# Supplementary material for: Mining protein networks for synthetic genetic interactions
Source: PubMed Central journal article supplement (PMC2577120; doi:10.1186/1471-2105-9-426), 2008-10-09
Supplement: 1471-2105-9-426-S1.pdf [file 1471-2105-9-426-S1.pdf]

## Supplementary Information

### Classifier performance comparison.

Comparison of the classification performance between the method used in this paper and that of Wong et al. [2] can be done in two ways. One approach is to apply the classification method used by Wong et al. on the SSL and non-SSL datasets used in this paper, but this could not be done as the authors did not report the values for the input features. The other approach is to apply the classification method used in this paper on the SSL and non-SSL used by Wong et al. So the analysis was redone using the SSL and non-SSL pairs from [1] alone. Unfortunately, an exact comparison is not possible even in this case as the classification method used in this paper requires the proteins corresponding to the input SSL and non-SSL pairs be present in literature curated (LC) protein interaction network used in this paper (from which the input centrality measures were calculated). After removal of pairs whose corresponding proteins are not represented in the LC protein interaction network along with repeats (A-B needs to be treated same as B-A) and pairs whose corresponding ORFs were found to be dubious, the genetic interaction dataset was reduced to 2681 unique SSL pairs and 223663 unique non-SSL pairs. A 4-fold cross validation (as in [2]) was then carried out by using balanced SSL and non-SSL training data for training but representative datasets for testing (similar to 10-fold cross validation in this paper). In each cross validation run, the classifier was trained using the training data and tested on the withheld data resulting in 4 different ROC curves for as many training sets. To assess the importance of 2Hop characteristics 4-fold cross validation was carried before and after the inclusion of 2Hop characteristics as was done in [2]. The ROC curves are reported in Supplementary Figure 1.

The accuracy metric reported in [2] was the sensitivity of the method at a false positive rate of 18%. This sensitivity was found to be 80% in [2] when 2Hop features were included. Further, from the ROC curves reported in [2], we estimated the sensitivity at 18% without 2Hop features to be about 35%, the area under the ROC curve (AUC) with 2Hop features to be about 0.87, and the AUC without 2Hop features to be about 0.70. In comparison, even though our method uses a more limited feature set, it performs better under both metrics (sensitivity at 18% FPR as well as AUC) with and without 2Hop features included, as is clear from Supplementary Table 1.

**Supplementary Table 1: Area under the ROC curves (AUC) and sensitivity at 18% False Positive Rate (S18FPR) across 4 cross validation runs.** Four fold cross validation was carried out with and without using 2Hop characteristics.

| No.  | AUC - w/o 2Hop | AUC - with 2Hop | S18FPR - w/o 2Hop | S18FPR - with 2Hop |
|------|----------------|-----------------|-------------------|--------------------|
| Run1 | 0.721          | 0.900           | 48.3%             | 85.7%              |
| Run2 | 0.727          | 0.896           | 52.4%             | 86.6%              |
| Run3 | 0.740          | 0.883           | 52.2%             | 84.3%              |
| Run4 | 0.726          | 0.893           | 52.1%             | 85.7%              |

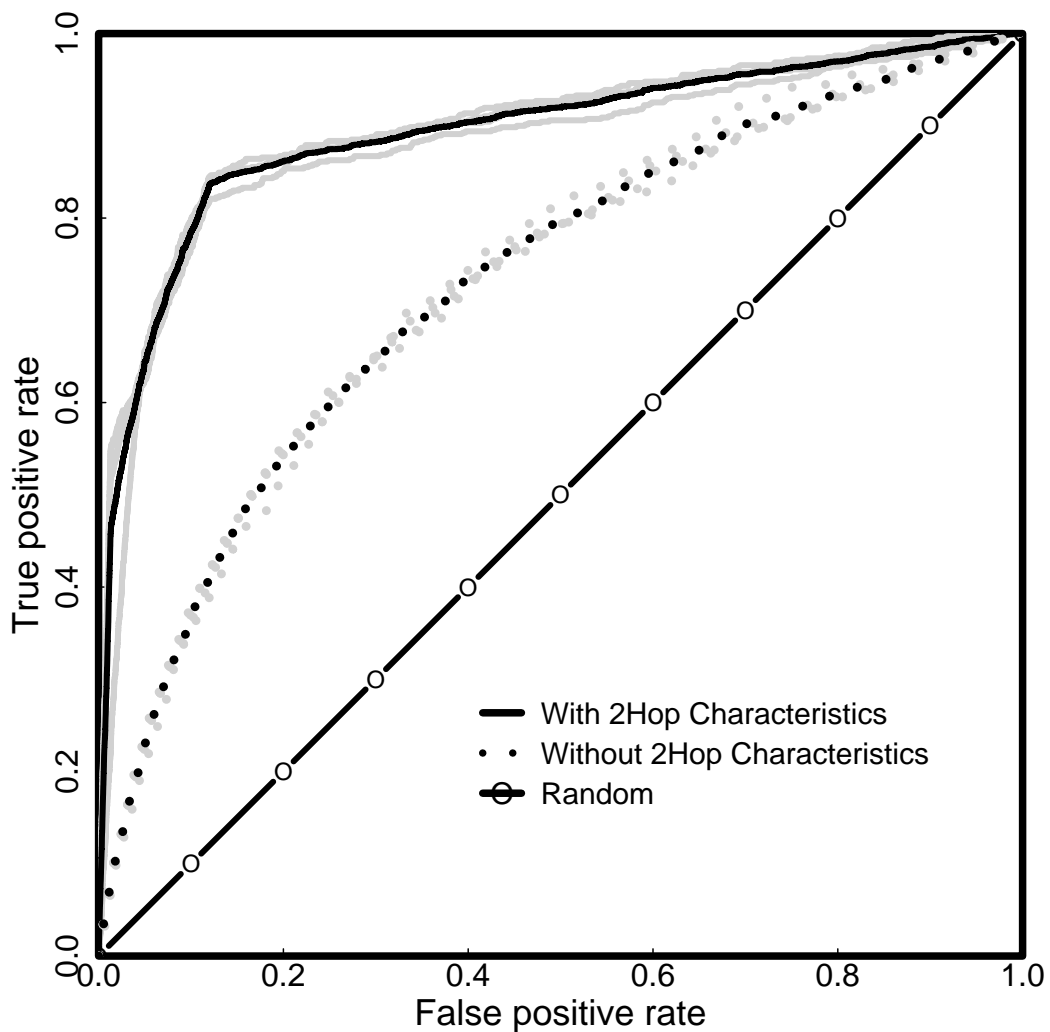

Supplementary Figure 1: Performance of the classifier in cross validation with and without using 2Hop Characteristics. The ROC curves for cross-validation runs (shown in grey) were overlaid by the vertical average curves.

## References

- [1] A.H.Y. Tong, G. Lesage, G.D. Bader, H Ding, H. Xu, X. Xin, J. Young, and etal. Global mapping of the yeast genetic interaction network. *Science*, 303:808–813, 2004.
- [2] S. L. Wong, L. V. Zhang, A. H. Tong, Z. Li, D. S. Goldberg, O. D. King, G. Lesage, M. Vidal, B. Andrews, H. Bussey, C. Boone, and F. P. Roth. Combining biological networks to predict genetic interactions. *Proc Natl Acad Sci U S A*, 101(44):15682–15687, November 2004.

## Predictions at different threshold levels

Since the predictions at each of the threshold levels were obtained by collecting the common predictions at that level of threshold across five different runs it is not possible to assign a unique score (propensity for being SSL) for each of the predictions. So we have reported the common predictions separately at each threshold level.

## Predicted pairs at a threshold level of 0.75

| Predictions at threshold level 0.75 |               |                         |               |
|-------------------------------------|---------------|-------------------------|---------------|
| Gene1 of predicted pair             |               | Gene2 of predicted pair |               |
| Systematic Name                     | Standard Name | Systematic Name         | Standard Name |
| YGL025C                             | PGD1          | YJR032W                 | CPR7          |
| YNL199C                             | GCR2          | YGR059W                 | SPR3          |
| YLR377C                             | FBP1          | YDR028C                 | REG1          |
| YDL116W                             | NUP84         | YNL236W                 | SIN4          |
| YNL054W                             | VAC7          | YDR378C                 | LSM6          |
| YKL038W                             | RGT1          | YOR047C                 | STD1          |
| YGR108W                             | CLB1          | YDL155W                 | CLB3          |
| YJL136C                             | RPS21B        | YJL095W                 | BCK1          |
| YMR095C                             | SNO1          | YNL032W                 | SIW14         |
| YLR435W                             | TSR2          | YGL019W                 | CKB1          |
| YHR111W                             | UBA4          | YGR270W                 | YTA7          |
| YBL102W                             | SFT2          | YJR040W                 | GEF1          |
| YBL008W                             | HIR1          | YML115C                 | VAN1          |
| YNR072W                             | HXT17         | YLR180W                 | SAM1          |
| YCR081W                             | SRB8          | YMR311C                 | GLC8          |
| YLR094C                             | GIS3          | YPL137C                 | GIP3          |
| YOR275C                             | RIM20         | YLR320W                 | MMS22         |
| YOR043W                             | WHI2          | YDL077C                 | VAM6          |
| YJL183W                             | MNN11         | YKL119C                 | VPH2          |
| YHR056C                             | RSC30         | YPR119W                 | CLB2          |
| YGR014W                             | MSB2          | YKL041W                 | VPS24         |

| Predictions at threshold level 0.75 continued... |               |                         |               |
|--------------------------------------------------|---------------|-------------------------|---------------|
| Gene1 of predicted pair                          |               | Gene2 of predicted pair |               |
| Systematic Name                                  | Standard Name | Systematic Name         | Standard Name |
| YEL027W                                          | CUP5          | YHR039C-A               | VMA10         |
| YBR131W                                          | CCZ1          | YBR041W                 | FAT1          |
| YFR031C-A                                        | RPL2A         | YHR081W                 | LRP1          |
| YFR036W                                          | CDC26         | YNL107W                 | YAF9          |
| YGL025C                                          | PGD1          | YBR289W                 | SNF5          |
| YDR137W                                          | RGP1          | YOR038C                 | HIR2          |
| YOR358W                                          | HAP5          | YAL002W                 | VPS8          |
| YBL051C                                          | PIN4          | YDR183W                 | PLP1          |
| YBL102W                                          | SFT2          | YNL291C                 | MID1          |
| YMR109W                                          | MYO5          | YLR233C                 | EST1          |
| YCR077C                                          | PAT1          | YGR188C                 | BUB1          |
| YER161C                                          | SPT2          | YDR440W                 | DOT1          |
| YMR080C                                          | NAM7          | YHR077C                 | NMD2          |
| YLR043C                                          | TRX1          | YDR423C                 | CAD1          |
| YDR456W                                          | NHX1          | YNL199C                 | GCR2          |
| YPL057C                                          | SUR1          | YBR019C                 | GAL10         |
| YDL161W                                          | ENT1          | YNR006W                 | VPS27         |
| YLR288C                                          | MEC3          | YML016C                 | PPZ1          |
| YLR018C                                          | POM34         | YDR207C                 | UME6          |
| YGL003C                                          | CDH1          | YMR214W                 | SCJ1          |
| YOR080W                                          | DIA2          | YDL047W                 | SIT4          |
| YMR205C                                          | PFK2          | YKR020W                 | VPS51         |
| YMR284W                                          | YKU70         | YER116C                 | SLX8          |
| YKR001C                                          | VPS1          | YLR182W                 | SWI6          |
| YHR108W                                          | GGA2          | YDL192W                 | ARF1          |
| YBR009C                                          | HHF1          | YOR064C                 | YNG1          |
| YOR270C                                          | VPH1          | YNL307C                 | MCK1          |
| YNL054W                                          | VAC7          | YJR060W                 | CBF1          |
| YPR072W                                          | NOT5          | YJR063W                 | RPA12         |

| Predictions at threshold level 0.75 continued... |               |                         |               |
|--------------------------------------------------|---------------|-------------------------|---------------|
| Gene1 of predicted pair                          |               | Gene2 of predicted pair |               |
| Systematic Name                                  | Standard Name | Systematic Name         | Standard Name |
| YLR292C                                          | SEC72         | YOR023C                 | AHC1          |
| YDR443C                                          | SSN2          | YBR019C                 | GAL10         |
| YDR507C                                          | GIN4          | YOR327C                 | SNC2          |
| YJL187C                                          | SWE1          | YCR086W                 | CSM1          |
| YLR360W                                          | VPS38         | YLR079W                 | SIC1          |
| YJL154C                                          | VPS35         | YDL192W                 | ARF1          |
| YGL163C                                          | RAD54         | YOR038C                 | HIR2          |
| YLR234W                                          | TOP3          | YNL206C                 | RTT106        |
| YBR258C                                          | SHG1          | YGL237C                 | HAP2          |
| YPL178W                                          | CBC2          | YKL068W                 | NUP100        |
| YGR071C                                          | YGR071C       | YGR188C                 | BUB1          |
| YLR386W                                          | VAC14         | YER116C                 | SLX8          |
| YBR042C                                          | CST26         | YDR358W                 | GGA1          |
| YBL079W                                          | NUP170        | YKR024C                 | DBP7          |
| YLR216C                                          | CPR6          | YFR036W                 | CDC26         |
| YHR056C                                          | RSC30         | YKL113C                 | RAD27         |
| YBR107C                                          | IML3          | YNL147W                 | LSM7          |
| YPR120C                                          | CLB5          | YLR315W                 | NKP2          |
| YBR173C                                          | UMP1          | YGL115W                 | SNF4          |
| YBR042C                                          | CST26         | YDR137W                 | RGP1          |
| YGR070W                                          | ROM1          | YOL081W                 | IRA2          |
| YEL065W                                          | SIT1          | YEL060C                 | PRB1          |
| YDR129C                                          | SAC6          | YDR310C                 | SUM1          |
| YMR198W                                          | CIK1          | YPL180W                 | TCO89         |
| YGL208W                                          | SIP2          | YJL187C                 | SWE1          |
| YBL103C                                          | RTG3          | YER040W                 | GLN3          |
| YOR270C                                          | VPH1          | YBR171W                 | SEC66         |
| YGL033W                                          | HOP2          | YDL192W                 | ARF1          |
| YOR337W                                          | TEA1          | YJL095W                 | BCK1          |

| Predictions at threshold level 0.75 continued... |               |                         |               |
|--------------------------------------------------|---------------|-------------------------|---------------|
| Gene1 of predicted pair                          |               | Gene2 of predicted pair |               |
| Systematic Name                                  | Standard Name | Systematic Name         | Standard Name |
| YJR063W                                          | RPA12         | YOR064C                 | YNG1          |
| YGR261C                                          | APL6          | YJL053W                 | PEP8          |
| YGL025C                                          | PGD1          | YOR327C                 | SNC2          |
| YJL124C                                          | LSM1          | YBL047C                 | EDE1          |
| YBR200W                                          | BEM1          | YBL021C                 | HAP3          |
| YJL006C                                          | CTK2          | YLR182W                 | SWI6          |
| YDR335W                                          | MSN5          | YDR318W                 | MCM21         |
| YPL105C                                          | YPL105C       | YOR327C                 | SNC2          |
| YOR080W                                          | DIA2          | YJR135C                 | MCM22         |
| YDR320C                                          | SWA2          | YGR105W                 | VMA21         |
| YDL020C                                          | RPN4          | YGR270W                 | YTA7          |
| YPL024W                                          | RMI1          | YPR036W                 | VMA13         |
| YBR274W                                          | CHK1          | YGR188C                 | BUB1          |
| YFR031C-A                                        | RPL2A         | YAL002W                 | VPS8          |
| YDR012W                                          | RPL4B         | YOR078W                 | BUD21         |
| YDL122W                                          | UBP1          | YOR124C                 | UBP2          |
| YOR127W                                          | RGA1          | YML001W                 | YPT7          |
| YDR260C                                          | SWM1          | YGR135W                 | PRE9          |
| YNL236W                                          | SIN4          | YER068W                 | MOT2          |
| YKL126W                                          | YPK1          | YGL212W                 | VAM7          |
| YOL018C                                          | TLG2          | YOR036W                 | PEP12         |
| YDR383C                                          | NKP1          | YJL006C                 | CTK2          |
| YNR052C                                          | POP2          | YLR315W                 | NKP2          |
| YNL087W                                          | TCB2          | YER144C                 | UBP5          |
| YER116C                                          | SLX8          | YPL037C                 | EGD1          |
| YLR079W                                          | SIC1          | YNL116W                 | DMA2          |
| YER044C                                          | ERG28         | YOR035C                 | SHE4          |
| YOR290C                                          | SNF2          | YBR019C                 | GAL10         |
| YDL223C                                          | HBT1          | YML071C                 | COG8          |

| Predictions at threshold level 0.75 continued... |               |                         |               |
|--------------------------------------------------|---------------|-------------------------|---------------|
| Gene1 of predicted pair                          |               | Gene2 of predicted pair |               |
| Systematic Name                                  | Standard Name | Systematic Name         | Standard Name |
| YPR017C                                          | DSS4          | YKR001C                 | VPS1          |
| YPL042C                                          | SSN3          | YOR038C                 | HIR2          |
| YNR072W                                          | HXT17         | YDL192W                 | ARF1          |
| YCR020C-A                                        | MAK31         | YNL238W                 | KEX2          |
| YIR003W                                          | YIR003W       | YPR119W                 | CLB2          |
| YBR194W                                          | SOY1          | YJL183W                 | MNN11         |
| YPL024W                                          | RMI1          | YDR358W                 | GGA1          |
| YDL020C                                          | RPN4          | YAL002W                 | VPS8          |
| YDR320C                                          | SWA2          | YCR066W                 | RAD18         |
| YBR173C                                          | UMP1          | YOR368W                 | RAD17         |
| YHL020C                                          | OPI1          | YNR032W                 | PPG1          |
| YBR030W                                          | YBR030W       | YOL121C                 | RPS19A        |
| YNL238W                                          | KEX2          | YHR108W                 | GGA2          |
| YDL013W                                          | SLX5          | YDL155W                 | CLB3          |
| YPL137C                                          | GIP3          | YER162C                 | RAD4          |
| YPL050C                                          | MNN9          | YCR088W                 | ABP1          |
| YER110C                                          | KAP123        | YPL246C                 | RBD2          |
| YJL117W                                          | PHO86         | YPL089C                 | RLM1          |
| YOL067C                                          | RTG1          | YAR014C                 | BUD14         |
| YOR039W                                          | CKB2          | YCR031C                 | RPS14A        |
| YML095C                                          | RAD10         | YDR318W                 | MCM21         |
| YNL054W                                          | VAC7          | YNL248C                 | RPA49         |
| YIL076W                                          | SEC28         | YDR320C                 | SWA2          |
| YLR240W                                          | VPS34         | YMR202W                 | ERG2          |
| YOR132W                                          | VPS17         | YPL234C                 | TFP3          |
| YBR017C                                          | KAP104        | YKL057C                 | NUP120        |
| YCL001W                                          | RER1          | YHR012W                 | VPS29         |
| YDR310C                                          | SUM1          | YNR032W                 | PPG1          |
| YMR224C                                          | MRE11         | YKR020W                 | VPS51         |



| Predictions at threshold level 0.75 continued... |               |                         |               |
|--------------------------------------------------|---------------|-------------------------|---------------|
| Gene1 of predicted pair                          |               | Gene2 of predicted pair |               |
| Systematic Name                                  | Standard Name | Systematic Name         | Standard Name |
| YNL087W                                          | TCB2          | YER040W                 | GLN3          |
| YPL042C                                          | SSN3          | YPL057C                 | SUR1          |
| YOR069W                                          | VPS5          | YJR032W                 | CPR7          |
| YAL056W                                          | GPB2          | YPR119W                 | CLB2          |
| YDL127W                                          | PCL2          | YDR289C                 | RTT103        |
| YML103C                                          | NUP188        | YPL018W                 | CTF19         |
| YIL053W                                          | RHR2          | YPL195W                 | APL5          |
| YCL027W                                          | FUS1          | YNL058C                 | YNL058C       |
| YBL078C                                          | ATG8          | YBR131W                 | CCZ1          |
| YDL065C                                          | PEX19         | YGL153W                 | PEX14         |
| YOL051W                                          | GAL11         | YBR010W                 | HHT1          |
| YIL036W                                          | CST6          | YLR399C                 | BDF1          |
| YER161C                                          | SPT2          | YDR310C                 | SUM1          |
| YMR199W                                          | CLN1          | YPR119W                 | CLB2          |
| YMR167W                                          | MLH1          | YPR119W                 | CLB2          |
| YNL054W                                          | VAC7          | YMR055C                 | BUB2          |
| YNL087W                                          | TCB2          | YJR084W                 | CSN12         |
| YOL121C                                          | RPS19A        | YOR035C                 | SHE4          |
| YBR111W-A                                        | SUS1          | YLR399C                 | BDF1          |
| YLR386W                                          | VAC14         | YGL212W                 | VAM7          |
| YMR284W                                          | YKU70         | YLR313C                 | SPH1          |
| YGL025C                                          | PGD1          | YOR066W                 | MSA1          |
| YOR109W                                          | INP53         | YDR207C                 | UME6          |
| YNL032W                                          | SIW14         | YMR016C                 | SOK2          |
| YGL133W                                          | ITC1          | YLR102C                 | APC9          |
| YMR224C                                          | MRE11         | YOR312C                 | RPL20B        |
| YHR039C-A                                        | VMA10         | YDL083C                 | RPS16B        |
| YEL065W                                          | SIT1          | YMR133W                 | REC114        |
| YPL105C                                          | YPL105C       | YNL051W                 | COG5          |

| Predictions at threshold level 0.75 continued... |               |                         |               |
|--------------------------------------------------|---------------|-------------------------|---------------|
| Gene1 of predicted pair                          |               | Gene2 of predicted pair |               |
| Systematic Name                                  | Standard Name | Systematic Name         | Standard Name |
| YDR378C                                          | LSM6          | YGL003C                 | CDH1          |
| YGR241C                                          | YAP1802       | YKL135C                 | APL2          |
| YMR273C                                          | ZDS1          | YML057W                 | CMP2          |
| YMR172W                                          | HOT1          | YNL288W                 | CAF40         |
| YKR020W                                          | VPS51         | YNL289W                 | PCL1          |
| YJR032W                                          | CPR7          | YOL018C                 | TLG2          |
| YKR099W                                          | BAS1          | YMR311C                 | GLC8          |
| YGL163C                                          | RAD54         | YHR115C                 | DMA1          |
| YDL155W                                          | CLB3          | YPL018W                 | CTF19         |
| YML099C                                          | ARG81         | YDR207C                 | UME6          |
| YGL212W                                          | VAM7          | YCL001W                 | RER1          |
| YKL032C                                          | IXR1          | YNL116W                 | DMA2          |
| YMR055C                                          | BUB2          | YPL152W                 | RRD2          |
| YDR440W                                          | DOT1          | YGL003C                 | CDH1          |
| YJR135C                                          | MCM22         | YER122C                 | GLO3          |
| YNL032W                                          | SIW14         | YPL057C                 | SUR1          |
| YDR225W                                          | HTA1          | YBL003C                 | HTA2          |
| YBR107C                                          | IML3          | YLR233C                 | EST1          |
| YKR035W-A                                        | DID2          | YEL060C                 | PRB1          |
| YGL115W                                          | SNF4          | YOL091W                 | SPO21         |
| YMR224C                                          | MRE11         | YKL126W                 | YPK1          |
| YLR381W                                          | CTF3          | YNL166C                 | BNI5          |
| YHR119W                                          | SET1          | YBR175W                 | SWD3          |
| YBR030W                                          | YBR030W       | YMR152W                 | YIM1          |
| YFR031C-A                                        | RPL2A         | YFR010W                 | UBP6          |
| YER115C                                          | SPR6          | YMR273C                 | ZDS1          |
| YCR020C-A                                        | MAK31         | YOR069W                 | VPS5          |
| YLR337C                                          | VRP1          | YGL124C                 | MON1          |
| YDL161W                                          | ENT1          | YJR125C                 | ENT3          |

| Predictions at threshold level 0.75 continued... |               |                         |               |
|--------------------------------------------------|---------------|-------------------------|---------------|
| Gene1 of predicted pair                          |               | Gene2 of predicted pair |               |
| Systematic Name                                  | Standard Name | Systematic Name         | Standard Name |
| YMR016C                                          | SOK2          | YLR370C                 | ARC18         |
| YEL065W                                          | SIT1          | YFR036W                 | CDC26         |
| YMR199W                                          | CLN1          | YBL087C                 | RPL23A        |
| YMR116C                                          | ASC1          | YGL153W                 | PEX14         |
| YDR080W                                          | VPS41         | YHR012W                 | VPS29         |
| YDR156W                                          | RPA14         | YOR275C                 | RIM20         |
| YDR004W                                          | RAD57         | YFR036W                 | CDC26         |
| YML038C                                          | YMD8          | YDR153C                 | ENT5          |
| YLR095C                                          | IOC2          | YDR310C                 | SUM1          |
| YLR079W                                          | SIC1          | YOR195W                 | SLK19         |
| YGR184C                                          | UBR1          | YDL013W                 | SLX5          |
| YDR395W                                          | SXM1          | YKL068W                 | NUP100        |
| YPR131C                                          | NAT3          | YDR192C                 | NUP42         |
| YIL159W                                          | BNR1          | YOR337W                 | TEA1          |
| YPL253C                                          | VIK1          | YHR115C                 | DMA1          |
| YER114C                                          | BOI2          | YHR061C                 | GIC1          |
| YDR320C                                          | SWA2          | YJR040W                 | GEF1          |
| YLR352W                                          | YLR352W       | YMR038C                 | CCS1          |
| YLR094C                                          | GIS3          | YGL003C                 | CDH1          |
| YFL047W                                          | RGD2          | YPL246C                 | RBD2          |
| YHR039C-A                                        | VMA10         | YDR207C                 | UME6          |
| YJL006C                                          | CTK2          | YOR141C                 | ARP8          |
| YGL078C                                          | DBP3          | YEL060C                 | PRB1          |
| YGR020C                                          | VMA7          | YER162C                 | RAD4          |
| YFR030W                                          | MET10         | YJL006C                 | CTK2          |
| YLR079W                                          | SIC1          | YMR199W                 | CLN1          |
| YER116C                                          | SLX8          | YLR093C                 | NYV1          |
| YJR056C                                          | YJR056C       | YGL003C                 | CDH1          |
| YPL046C                                          | ELC1          | YNL230C                 | ELA1          |

| Predictions at threshold level 0.75 continued... |               |                         |               |
|--------------------------------------------------|---------------|-------------------------|---------------|
| Gene1 of predicted pair                          |               | Gene2 of predicted pair |               |
| Systematic Name                                  | Standard Name | Systematic Name         | Standard Name |
| YLR423C                                          | ATG17         | YPR119W                 | CLB2          |
| YMR125W                                          | STO1          | YML057W                 | CMP2          |
| YDL020C                                          | RPN4          | YOR358W                 | HAP5          |
| YDL192W                                          | ARF1          | YEL042W                 | GDA1          |
| YHR052W                                          | CIC1          | YLR325C                 | RPL38         |
| YOR195W                                          | SLK19         | YMR055C                 | BUB2          |
| YPL105C                                          | YPL105C       | YLR309C                 | IMH1          |
| YLR119W                                          | SRN2          | YNL058C                 | YNL058C       |
| YJL138C                                          | TIF2          | YDR310C                 | SUM1          |
| YOR127W                                          | RGA1          | YDR144C                 | MKC7          |
| YIL103W                                          | DPH1          | YGR188C                 | BUB1          |
| YDL116W                                          | NUP84         | YLR313C                 | SPH1          |
| YNR052C                                          | POP2          | YMR038C                 | CCS1          |
| YBR036C                                          | CSG2          | YMR230W                 | RPS10B        |
| YDR385W                                          | EFT2          | YBL071W-A               | KTI11         |
| YMR095C                                          | SNO1          | YER040W                 | GLN3          |
| YPR030W                                          | CSR2          | YDR358W                 | GGA1          |
| YMR224C                                          | MRE11         | YGL252C                 | RTG2          |
| YBR171W                                          | SEC66         | YHR200W                 | RPN10         |
| YLR381W                                          | CTF3          | YJR060W                 | CBF1          |
| YBR164C                                          | ARL1          | YEL022W                 | GEA2          |
| YDR477W                                          | SNF1          | YBR171W                 | SEC66         |
| YLR399C                                          | BDF1          | YML112W                 | CTK3          |
| YFR031C-A                                        | RPL2A         | YFL023W                 | BUD27         |
| YDR363W-A                                        | SEM1          | YGR188C                 | BUB1          |
| YCR066W                                          | RAD18         | YAL015C                 | NTG1          |
| YOR127W                                          | RGA1          | YML095C                 | RAD10         |
| YBR057C                                          | MUM2          | YEL036C                 | ANP1          |
| YOR290C                                          | SNF2          | YKL109W                 | HAP4          |

| Predictions at threshold level 0.75 continued... |               |                         |               |
|--------------------------------------------------|---------------|-------------------------|---------------|
| Gene1 of predicted pair                          |               | Gene2 of predicted pair |               |
| Systematic Name                                  | Standard Name | Systematic Name         | Standard Name |
| YBL051C                                          | PIN4          | YLR447C                 | VMA6          |
| YKL101W                                          | HSL1          | YOL081W                 | IRA2          |
| YBL058W                                          | SHP1          | YMR133W                 | REC114        |
| YDR200C                                          | VPS64         | YKL114C                 | APN1          |
| YOR112W                                          | CEX1          | YPL037C                 | EGD1          |
| YBR030W                                          | YBR030W       | YHR039C-A               | VMA10         |
| YPR084W                                          | YPR084W       | YDR289C                 | RTT103        |
| YOR039W                                          | CKB2          | YGR252W                 | GCN5          |
| YHR157W                                          | REC104        | YGL213C                 | SKI8          |
| YPL147W                                          | PXA1          | YPL145C                 | KES1          |
| YOR094W                                          | ARF3          | YCL034W                 | LSB5          |
| YPR018W                                          | RLF2          | YCR086W                 | CSM1          |
| YEL065W                                          | SIT1          | YGR104C                 | SRB5          |
| YPL129W                                          | TAF14         | YBL075C                 | SSA3          |
| YGL212W                                          | VAM7          | YIL133C                 | RPL16A        |
| YLR381W                                          | CTF3          | YPL057C                 | SUR1          |
| YPR018W                                          | RLF2          | YDR181C                 | SAS4          |
| YMR055C                                          | BUB2          | YBR036C                 | CSG2          |
| YDL226C                                          | GCS1          | YKL114C                 | APN1          |
| YDL116W                                          | NUP84         | YDR076W                 | RAD55         |
| YCL037C                                          | SRO9          | YNL297C                 | MON2          |
| YDR443C                                          | SSN2          | YNL076W                 | MKS1          |
| YOR059C                                          | YOR059C       | YKL094W                 | YJU3          |
| YBL058W                                          | SHP1          | YNL307C                 | MCK1          |
| YJR060W                                          | CBF1          | YDL226C                 | GCS1          |
| YPL022W                                          | RAD1          | YML095C                 | RAD10         |
| YOL111C                                          | MDY2          | YMR214W                 | SCJ1          |
| YMR055C                                          | BUB2          | YOR014W                 | RTS1          |
| YPR040W                                          | TIP41         | YOR327C                 | SNC2          |

| Predictions at threshold level 0.75 continued... |               |                         |               |
|--------------------------------------------------|---------------|-------------------------|---------------|
| Gene1 of predicted pair                          |               | Gene2 of predicted pair |               |
| Systematic Name                                  | Standard Name | Systematic Name         | Standard Name |
| YGL200C                                          | EMP24         | YML012W                 | ERV25         |
| YML095C                                          | RAD10         | YJR135C                 | MCM22         |
| YER116C                                          | SLX8          | YHR010W                 | RPL27A        |
| YIL036W                                          | CST6          | YDL006W                 | PTC1          |
| YOL111C                                          | MDY2          | YDR261C                 | EXG2          |
| YBL101C                                          | ECM21         | YBL025W                 | RRN10         |
| YJR084W                                          | CSN12         | YDR310C                 | SUM1          |
| YGL124C                                          | MON1          | YCR053W                 | THR4          |
| YDR477W                                          | SNF1          | YER096W                 | SHC1          |
| YOR140W                                          | SFL1          | YDR207C                 | UME6          |
| YDR358W                                          | GGA1          | YMR214W                 | SCJ1          |
| YDL002C                                          | NHP10         | YEL013W                 | VAC8          |
| YPR018W                                          | RLF2          | YOR033C                 | EXO1          |
| YHR060W                                          | VMA22         | YNR032W                 | PPG1          |
| YKL048C                                          | ELM1          | YHR115C                 | DMA1          |
| YOL126C                                          | MDH2          | YKL117W                 | SBA1          |
| YDR101C                                          | ARX1          | YBR267W                 | REI1          |
| YNL215W                                          | IES2          | YDR254W                 | CHL4          |
| YPL037C                                          | EGD1          | YOR327C                 | SNC2          |
| YGL019W                                          | CKB1          | YLR350W                 | ORM2          |
| YKL110C                                          | KTI12         | YLR182W                 | SWI6          |
| YBL058W                                          | SHP1          | YOR035C                 | SHE4          |
| YLR043C                                          | TRX1          | YER042W                 | MXR1          |
| YNL307C                                          | MCK1          | YGR270W                 | YTA7          |
| YKL048C                                          | ELM1          | YKR035W-A               | DID2          |
| YHR039C-A                                        | VMA10         | YOR327C                 | SNC2          |
| YHR014W                                          | SPO13         | YIL002C                 | INP51         |
| YKL048C                                          | ELM1          | YML071C                 | COG8          |
| YDR484W                                          | VPS52         | YOR069W                 | VPS5          |

| Predictions at threshold level 0.75 continued... |               |                         |               |
|--------------------------------------------------|---------------|-------------------------|---------------|
| Gene1 of predicted pair                          |               | Gene2 of predicted pair |               |
| Systematic Name                                  | Standard Name | Systematic Name         | Standard Name |
| YPL024W                                          | RMI1          | YML115C                 | VAN1          |
| YHL031C                                          | GOS1          | YDR137W                 | RGP1          |
| YDL160C                                          | DHH1          | YKR095W                 | MLP1          |
| YOR337W                                          | TEA1          | YBR171W                 | SEC66         |
| YGR249W                                          | MGA1          | YLR452C                 | SST2          |
| YNL307C                                          | MCK1          | YOR043W                 | WHI2          |
| YBR107C                                          | IML3          | YGL252C                 | RTG2          |
| YPL037C                                          | EGD1          | YBL025W                 | RRN10         |
| YPR051W                                          | MAK3          | YKL048C                 | ELM1          |
| YPL042C                                          | SSN3          | YDL002C                 | NHP10         |
| YNR072W                                          | HXT17         | YER044C                 | ERG28         |
| YNL031C                                          | HHT2          | YBL002W                 | HTB2          |
| YDR254W                                          | CHL4          | YJR060W                 | CBF1          |
| YKR048C                                          | NAP1          | YBR010W                 | HHT1          |
| YOR066W                                          | MSA1          | YNL041C                 | COG6          |
| YMR199W                                          | CLN1          | YPL161C                 | BEM4          |
| YGR071C                                          | YGR071C       | YHR167W                 | THP2          |
| YMR224C                                          | MRE11         | YJL124C                 | LSM1          |
| YER122C                                          | GLO3          | YKR030W                 | GMH1          |
| YGL178W                                          | MPT5          | YBR171W                 | SEC66         |
| YLR386W                                          | VAC14         | YEL060C                 | PRB1          |
| YMR116C                                          | ASC1          | YJL117W                 | PHO86         |
| YJL127C                                          | SPT10         | YLR410W                 | VIP1          |
| YBL047C                                          | EDE1          | YJL006C                 | CTK2          |
| YGL223C                                          | COG1          | YEL043W                 | YEL043W       |
| YDL006W                                          | PTC1          | YOL018C                 | TLG2          |
| YGR105W                                          | VMA21         | YER122C                 | GLO3          |
| YGR019W                                          | UGA1          | YBR171W                 | SEC66         |
| YNL032W                                          | SIW14         | YER162C                 | RAD4          |

| Predictions at threshold level 0.75 continued... |               |                         |               |
|--------------------------------------------------|---------------|-------------------------|---------------|
| Gene1 of predicted pair                          |               | Gene2 of predicted pair |               |
| Systematic Name                                  | Standard Name | Systematic Name         | Standard Name |
| YBL008W                                          | HIR1          | YJL176C                 | SWI3          |
| YDL020C                                          | RPN4          | YNL206C                 | RTT106        |
| YDR484W                                          | VPS52         | YOR066W                 | MSA1          |
| YCR065W                                          | HCM1          | YOL081W                 | IRA2          |
| YNL106C                                          | INP52         | YML103C                 | NUP188        |
| YOR132W                                          | VPS17         | YHL002W                 | HSE1          |
| YNL087W                                          | TCB2          | YEL060C                 | PRB1          |
| YOR043W                                          | WHI2          | YOL081W                 | IRA2          |
| YAL024C                                          | LTE1          | YPL137C                 | GIP3          |
| YLL039C                                          | UBI4          | YPL213W                 | LEA1          |
| YBR173C                                          | UMP1          | YPL137C                 | GIP3          |
| YJR140C                                          | HIR3          | YDR363W-A               | SEM1          |
| YBR114W                                          | RAD16         | YNL107W                 | YAF9          |
| YNL069C                                          | RPL16B        | YJL036W                 | SNX4          |
| YMR199W                                          | CLN1          | YKL161C                 | YKL161C       |
| YAL024C                                          | LTE1          | YPL037C                 | EGD1          |
| YNL180C                                          | RHO5          | YPL240C                 | HSP82         |
| YJL095W                                          | BCK1          | YPR119W                 | CLB2          |
| YDR289C                                          | RTT103        | YLR254C                 | NDL1          |
| YLR094C                                          | GIS3          | YBR019C                 | GAL10         |
| YMR055C                                          | BUB2          | YLR315W                 | NKP2          |
| YPR029C                                          | APL4          | YDR153C                 | ENT5          |
| YNL127W                                          | FAR11         | YDR153C                 | ENT5          |
| YLR234W                                          | TOP3          | YGL163C                 | RAD54         |
| YDL223C                                          | HBT1          | YER040W                 | GLN3          |
| YKL139W                                          | CTK1          | YPL022W                 | RAD1          |
| YIL076W                                          | SEC28         | YOR043W                 | WHI2          |
| YAL030W                                          | SNC1          | YPR032W                 | SRO7          |
| YNL325C                                          | FIG4          | YBL025W                 | RRN10         |



| Predictions at threshold level 0.75 continued... |               |                         |               |
|--------------------------------------------------|---------------|-------------------------|---------------|
| Gene1 of predicted pair                          |               | Gene2 of predicted pair |               |
| Systematic Name                                  | Standard Name | Systematic Name         | Standard Name |
| YJL176C                                          | SWI3          | YGL215W                 | CLG1          |
| YLR362W                                          | STE11         | YBL085W                 | BOI1          |
| YPL042C                                          | SSN3          | YOL051W                 | GAL11         |
| YPL152W                                          | RRD2          | YGL163C                 | RAD54         |
| YBR036C                                          | CSG2          | YOL081W                 | IRA2          |
| YPL105C                                          | YPL105C       | YJR060W                 | CBF1          |
| YKR101W                                          | SIR1          | YDL042C                 | SIR2          |
| YLR398C                                          | SKI2          | YMR214W                 | SCJ1          |
| YHR178W                                          | STB5          | YNL107W                 | YAF9          |
| YMR199W                                          | CLN1          | YNL229C                 | URE2          |
| YOR337W                                          | TEA1          | YDR137W                 | RGP1          |
| YBR264C                                          | YPT10         | YNL044W                 | YIP3          |
| YDR310C                                          | SUM1          | YAL002W                 | VPS8          |
| YPL046C                                          | ELC1          | YBR114W                 | RAD16         |
| YPL129W                                          | TAF14         | YBR289W                 | SNF5          |
| YGR184C                                          | UBR1          | YDR363W-A               | SEM1          |
| YAL024C                                          | LTE1          | YLR234W                 | TOP3          |
| YGR108W                                          | CLB1          | YDR144C                 | MKC7          |
| YNL117W                                          | MLS1          | YJL095W                 | BCK1          |
| YPL161C                                          | BEM4          | YLR309C                 | IMH1          |
| YMR224C                                          | MRE11         | YOL111C                 | MDY2          |
| YMR109W                                          | MYO5          | YDR310C                 | SUM1          |
| YLR441C                                          | RPS1A         | YPL161C                 | BEM4          |
| YJL124C                                          | LSM1          | YNL016W                 | PUB1          |
| YDL223C                                          | HBT1          | YDR261C                 | EXG2          |
| YJR040W                                          | GEF1          | YNR032W                 | PPG1          |
| YLR320W                                          | MMS22         | YMR152W                 | YIM1          |
| YLR337C                                          | VRP1          | YDL155W                 | CLB3          |
| YNL069C                                          | RPL16B        | YKR001C                 | VPS1          |

| Predictions at threshold level 0.75 continued... |               |                         |               |
|--------------------------------------------------|---------------|-------------------------|---------------|
| Gene1 of predicted pair                          |               | Gene2 of predicted pair |               |
| Systematic Name                                  | Standard Name | Systematic Name         | Standard Name |
| YGL178W                                          | MPT5          | YMR263W                 | SAP30         |
| YDR483W                                          | KRE2          | YBR171W                 | SEC66         |
| YPR131C                                          | NAT3          | YNL236W                 | SIN4          |
| YKL139W                                          | CTK1          | YMR133W                 | REC114        |
| YJL124C                                          | LSM1          | YCL037C                 | SRO9          |
| YOR101W                                          | RAS1          | YNL079C                 | TPM1          |
| YGL200C                                          | EMP24         | YFL048C                 | EMP47         |
| YER162C                                          | RAD4          | YOL081W                 | IRA2          |
| YGL094C                                          | PAN2          | YKL114C                 | APN1          |
| YDR293C                                          | SSD1          | YJR032W                 | CPR7          |
| YNL215W                                          | IES2          | YGL151W                 | NUT1          |
| YMR054W                                          | STV1          | YEL051W                 | VMA8          |
| YOR069W                                          | VPS5          | YHL020C                 | OPI1          |
| YOL044W                                          | PEX15         | YGL153W                 | PEX14         |
| YER144C                                          | UBP5          | YPL195W                 | APL5          |
| YOR043W                                          | WHI2          | YGL115W                 | SNF4          |
| YBR274W                                          | CHK1          | YGL250W                 | RMR1          |
| YHR152W                                          | SPO12         | YKL032C                 | IXR1          |
| YBR217W                                          | ATG12         | YCR053W                 | THR4          |
| YDL077C                                          | VAM6          | YJR033C                 | RAV1          |
| YOR124C                                          | UBP2          | YLR182W                 | SWI6          |
| YKR014C                                          | YPT52         | YEL036C                 | ANP1          |
| YBR010W                                          | HHT1          | YNL030W                 | HHF2          |
| YCL001W                                          | RER1          | YEL053C                 | MAK10         |
| YNR052C                                          | POP2          | YLR182W                 | SWI6          |
| YOR132W                                          | VPS17         | YJR060W                 | CBF1          |
| YDR174W                                          | HMO1          | YJR135C                 | MCM22         |
| YMR095C                                          | SNO1          | YML115C                 | VAN1          |
| YOR023C                                          | AHC1          | YDR310C                 | SUM1          |

| Predictions at threshold level 0.75 continued... |               |                         |               |
|--------------------------------------------------|---------------|-------------------------|---------------|
| Gene1 of predicted pair                          |               | Gene2 of predicted pair |               |
| Systematic Name                                  | Standard Name | Systematic Name         | Standard Name |
| YDR108W                                          | GSG1          | YKR001C                 | VPS1          |
| YLR234W                                          | TOP3          | YBR200W                 | BEM1          |
| YBR274W                                          | CHK1          | YNL234W                 | YNL234W       |
| YEL065W                                          | SIT1          | YOR270C                 | VPH1          |
| YFR040W                                          | SAP155        | YLR452C                 | SST2          |
| YDR484W                                          | VPS52         | YDR207C                 | UME6          |
| YLR093C                                          | NYV1          | YOR327C                 | SNC2          |
| YCL067C                                          | HMLALPHA2     | YGR252W                 | GCN5          |
| YDR477W                                          | SNF1          | YMR016C                 | SOK2          |
| YOR043W                                          | WHI2          | YHR039C-A               | VMA10         |
| YBR228W                                          | SLX1          | YJL124C                 | LSM1          |
| YKR035W-A                                        | DID2          | YLR452C                 | SST2          |
| YGL212W                                          | VAM7          | YDL226C                 | GCS1          |
| YDR477W                                          | SNF1          | YIL076W                 | SEC28         |
| YNL307C                                          | MCK1          | YOR035C                 | SHE4          |
| YDR320C                                          | SWA2          | YPL234C                 | TFP3          |
| YLR309C                                          | IMH1          | YDR207C                 | UME6          |
| YKR072C                                          | SIS2          | YJR090C                 | GRR1          |
| YOR132W                                          | VPS17         | YMR004W                 | MVP1          |
| YBL103C                                          | RTG3          | YBR171W                 | SEC66         |
| YFL013C                                          | IES1          | YJL124C                 | LSM1          |
| YPR030W                                          | CSR2          | YJL095W                 | BCK1          |
| YKL126W                                          | YPK1          | YMR133W                 | REC114        |
| YPL022W                                          | RAD1          | YJL006C                 | CTK2          |
| YOR112W                                          | CEX1          | YOL108C                 | INO4          |
| YHR060W                                          | VMA22         | YKR020W                 | VPS51         |
| YLR090W                                          | XDJ1          | YFR031C-A               | RPL2A         |
| YGR054W                                          | YGR054W       | YOL067C                 | RTG1          |
| YML115C                                          | VAN1          | YPR046W                 | MCM16         |

| Predictions at threshold level 0.75 continued... |               |                         |               |
|--------------------------------------------------|---------------|-------------------------|---------------|
| Gene1 of predicted pair                          |               | Gene2 of predicted pair |               |
| Systematic Name                                  | Standard Name | Systematic Name         | Standard Name |
| YKR072C                                          | SIS2          | YJR035W                 | RAD26         |
| YJL154C                                          | VPS35         | YHL020C                 | OPI1          |
| YPL037C                                          | EGD1          | YOL081W                 | IRA2          |
| YDL184C                                          | RPL41A        | YOR035C                 | SHE4          |
| YML115C                                          | VAN1          | YCR031C                 | RPS14A        |
| YBR217W                                          | ATG12         | YJR084W                 | CSN12         |
| YGL033W                                          | HOP2          | YER139C                 | YER139C       |
| YMR216C                                          | SKY1          | YNL238W                 | KEX2          |
| YDL020C                                          | RPN4          | YDL059C                 | RAD59         |
| YJL124C                                          | LSM1          | YLR254C                 | NDL1          |
| YNL325C                                          | FIG4          | YPR030W                 | CSR2          |
| YNL087W                                          | TCB2          | YJL183W                 | MNN11         |
| YDR108W                                          | GSG1          | YAR014C                 | BUD14         |
| YOR132W                                          | VPS17         | YEL043W                 | YEL043W       |
| YCR086W                                          | CSM1          | YGL031C                 | RPL24A        |
| YER107C                                          | GLE2          | YMR223W                 | UBP8          |
| YDR123C                                          | INO2          | YHL020C                 | OPI1          |
| YOR096W                                          | RPS7A         | YOR078W                 | BUD21         |
| YER110C                                          | KAP123        | YDR310C                 | SUM1          |
| YOR127W                                          | RGA1          | YEL051W                 | VMA8          |
| YPL152W                                          | RRD2          | YPL018W                 | CTF19         |
| YLR360W                                          | VPS38         | YDR153C                 | ENT5          |
| YLR447C                                          | VMA6          | YJL095W                 | BCK1          |
| YMR224C                                          | MRE11         | YML103C                 | NUP188        |
| YHR039C-A                                        | VMA10         | YPL137C                 | GIP3          |
| YBL008W                                          | HIR1          | YHL025W                 | SNF6          |
| YHR013C                                          | ARD1          | YBR181C                 | RPS6B         |
| YDR137W                                          | RGP1          | YER044C                 | ERG28         |
| YGR020C                                          | VMA7          | YPL195W                 | APL5          |

| Predictions at threshold level 0.75 continued... |               |                         |               |
|--------------------------------------------------|---------------|-------------------------|---------------|
| Gene1 of predicted pair                          |               | Gene2 of predicted pair |               |
| Systematic Name                                  | Standard Name | Systematic Name         | Standard Name |
| YHR111W                                          | UBA4          | YPL161C                 | BEM4          |
| YLR006C                                          | SSK1          | YCR077C                 | PAT1          |
| YDL020C                                          | RPN4          | YLR288C                 | MEC3          |
| YNL117W                                          | MLS1          | YML028W                 | TSA1          |
| YMR164C                                          | MSS11         | YPL178W                 | CBC2          |
| YBL103C                                          | RTG3          | YNL076W                 | MKS1          |
| YDR443C                                          | SSN2          | YBL025W                 | RRN10         |
| YDR448W                                          | ADA2          | YFR034C                 | PHO4          |
| YDR254W                                          | CHL4          | YOL081W                 | IRA2          |
| YOR337W                                          | TEA1          | YPR036W                 | VMA13         |
| YCL024W                                          | KCC4          | YKL101W                 | HSL1          |
| YOR109W                                          | INP53         | YDR310C                 | SUM1          |
| YGL133W                                          | ITC1          | YOR127W                 | RGA1          |
| YBR200W                                          | BEM1          | YBR127C                 | VMA2          |
| YGL175C                                          | SAE2          | YMR231W                 | PEP5          |
| YGL115W                                          | SNF4          | YNL107W                 | YAF9          |
| YDR245W                                          | MNN10         | YHR108W                 | GGA2          |
| YLR399C                                          | BDF1          | YPR046W                 | MCM16         |
| YNL054W                                          | VAC7          | YLR315W                 | NKP2          |
| YOL086C                                          | ADH1          | YPR119W                 | CLB2          |
| YJL172W                                          | CPS1          | YKR035W-A               | DID2          |
| YGL078C                                          | DBP3          | YPL195W                 | APL5          |
| YFR036W                                          | CDC26         | YGL124C                 | MON1          |
| YPL024W                                          | RMI1          | YCR053W                 | THR4          |
| YPL253C                                          | VIK1          | YML112W                 | CTK3          |
| YEL027W                                          | CUP5          | YNL238W                 | KEX2          |
| YIL034C                                          | CAP2          | YLR429W                 | CRN1          |
| YJL095W                                          | BCK1          | YLR398C                 | SKI2          |
| YDR004W                                          | RAD57         | YKL068W                 | NUP100        |

| Predictions at threshold level 0.75 continued... |               |                         |               |
|--------------------------------------------------|---------------|-------------------------|---------------|
| Gene1 of predicted pair                          |               | Gene2 of predicted pair |               |
| Systematic Name                                  | Standard Name | Systematic Name         | Standard Name |
| YJR084W                                          | CSN12         | YCR053W                 | THR4          |
| YGR249W                                          | MGA1          | YBR036C                 | CSG2          |
| YJL154C                                          | VPS35         | YAR014C                 | BUD14         |
| YOR290C                                          | SNF2          | YPL137C                 | GIP3          |
| YMR026C                                          | PEX12         | YMR230W                 | RPS10B        |
| YHR073W                                          | OSH3          | YJR024C                 | MDE1          |
| YGL135W                                          | RPL1B         | YML071C                 | COG8          |
| YDR108W                                          | GSG1          | YEL051W                 | VMA8          |
| YDR171W                                          | HSP42         | YJR135C                 | MCM22         |
| YPR052C                                          | NHP6A         | YDR448W                 | ADA2          |
| YPR072W                                          | NOT5          | YGL094C                 | PAN2          |
| YNL325C                                          | FIG4          | YBR019C                 | GAL10         |
| YGL223C                                          | COG1          | YJL029C                 | VPS53         |
| YJL164C                                          | TPK1          | YAL030W                 | SNC1          |
| YER116C                                          | SLX8          | YJL172W                 | CPS1          |
| YMR016C                                          | SOK2          | YPR046W                 | MCM16         |
| YJL053W                                          | PEP8          | YDL226C                 | GCS1          |
| YJL187C                                          | SWE1          | YDL226C                 | GCS1          |
| YMR095C                                          | SNO1          | YBL058W                 | SHP1          |
| YJR060W                                          | CBF1          | YDR183W                 | PLP1          |
| YLR288C                                          | MEC3          | YNL297C                 | MON2          |
| YDL002C                                          | NHP10         | YLR350W                 | ORM2          |
| YER162C                                          | RAD4          | YLR309C                 | IMH1          |
| YGR249W                                          | MGA1          | YML071C                 | COG8          |
| YPL024W                                          | RMI1          | YBR108W                 | YBR108W       |
| YBL103C                                          | RTG3          | YPR046W                 | MCM16         |
| YDR358W                                          | GGA1          | YGL003C                 | CDH1          |
| YHR134W                                          | WSS1          | YDR144C                 | MKC7          |
| YJL078C                                          | PRY3          | YMR319C                 | FET4          |

| Predictions at threshold level 0.75 continued... |               |                         |               |
|--------------------------------------------------|---------------|-------------------------|---------------|
| Gene1 of predicted pair                          |               | Gene2 of predicted pair |               |
| Systematic Name                                  | Standard Name | Systematic Name         | Standard Name |
| YDR277C                                          | MTH1          | YPR119W                 | CLB2          |
| YGR217W                                          | CCH1          | YDL006W                 | PTC1          |
| YHR111W                                          | UBA4          | YJR135C                 | MCM22         |
| YBR173C                                          | UMP1          | YDL047W                 | SIT4          |
| YHR178W                                          | STB5          | YEL056W                 | HAT2          |
| YBL103C                                          | RTG3          | YDL083C                 | RPS16B        |
| YKR059W                                          | TIF1          | YJR140C                 | HIR3          |
| YPL161C                                          | BEM4          | YDR358W                 | GGA1          |
| YPL115C                                          | BEM3          | YLR386W                 | VAC14         |
| YML115C                                          | VAN1          | YPL195W                 | APL5          |
| YKR061W                                          | KTR2          | YML112W                 | CTK3          |
| YKL006W                                          | RPL14A        | YDR440W                 | DOT1          |
| YCR024C-A                                        | PMP1          | YPL246C                 | RBD2          |
| YLR234W                                          | TOP3          | YBR195C                 | MSI1          |
| YJR052W                                          | RAD7          | YOR028C                 | CIN5          |
| YMR016C                                          | SOK2          | YML001W                 | YPT7          |
| YDR254W                                          | CHL4          | YLR254C                 | NDL1          |
| YBL058W                                          | SHP1          | YJL183W                 | MNN11         |
| YPR036W                                          | VMA13         | YGL163C                 | RAD54         |
| YKL126W                                          | YPK1          | YLR180W                 | SAM1          |
| YEL065W                                          | SIT1          | YBR200W                 | BEM1          |
| YKL139W                                          | CTK1          | YPL137C                 | GIP3          |
| YGL212W                                          | VAM7          | YNL238W                 | KEX2          |
| YDR156W                                          | RPA14         | YKR020W                 | VPS51         |
| YKL010C                                          | UFD4          | YMR116C                 | ASC1          |
| YLR371W                                          | ROM2          | YBR019C                 | GAL10         |
| YLR337C                                          | VRP1          | YDR245W                 | MNN10         |
| YLR090W                                          | XDJ1          | YHR060W                 | VMA22         |
| YPL234C                                          | TFP3          | YER122C                 | GLO3          |

| Predictions at threshold level 0.75 continued... |               |                         |               |
|--------------------------------------------------|---------------|-------------------------|---------------|
| Gene1 of predicted pair                          |               | Gene2 of predicted pair |               |
| Systematic Name                                  | Standard Name | Systematic Name         | Standard Name |
| YDL020C                                          | RPN4          | YML115C                 | VAN1          |
| YHR178W                                          | STB5          | YJR140C                 | HIR3          |
| YNL041C                                          | COG6          | YDL077C                 | VAM6          |
| YMR116C                                          | ASC1          | YGL175C                 | SAE2          |
| YDR448W                                          | ADA2          | YOL051W                 | GAL11         |
| YML016C                                          | PPZ1          | YJL124C                 | LSM1          |
| YLR360W                                          | VPS38         | YOR106W                 | VAM3          |
| YNL058C                                          | YNL058C       | YOR035C                 | SHE4          |
| YEL013W                                          | VAC8          | YER122C                 | GLO3          |
| YOL030W                                          | GAS5          | YJL124C                 | LSM1          |
| YJR060W                                          | CBF1          | YPL234C                 | TFP3          |
| YMR055C                                          | BUB2          | YJR005W                 | APL1          |
| YJL036W                                          | SNX4          | YPL161C                 | BEM4          |
| YHR012W                                          | VPS29         | YEL036C                 | ANP1          |
| YDR155C                                          | CPR1          | YJL095W                 | BCK1          |
| YOR358W                                          | HAP5          | YGR059W                 | SPR3          |
| YGR249W                                          | MGA1          | YEL060C                 | PRB1          |
| YDR443C                                          | SSN2          | YER139C                 | YER139C       |
| YPR171W                                          | BSP1          | YBR126C                 | TPS1          |
| YGL175C                                          | SAE2          | YDR207C                 | UME6          |
| YLR234W                                          | TOP3          | YHR111W                 | UBA4          |
| YNL199C                                          | GCR2          | YHR012W                 | VPS29         |
| YBR215W                                          | HPC2          | YNL107W                 | YAF9          |
| YHR081W                                          | LRP1          | YML071C                 | COG8          |
| YIL076W                                          | SEC28         | YPL105C                 | YPL105C       |
| YLR337C                                          | VRP1          | YGR270W                 | YTA7          |
| YPR189W                                          | SKI3          | YLR398C                 | SKI2          |
| YML038C                                          | YMD8          | YNL107W                 | YAF9          |
| YIL076W                                          | SEC28         | YBR217W                 | ATG12         |



| Predictions at threshold level 0.75 continued... |               |                         |               |
|--------------------------------------------------|---------------|-------------------------|---------------|
| Gene1 of predicted pair                          |               | Gene2 of predicted pair |               |
| Systematic Name                                  | Standard Name | Systematic Name         | Standard Name |
| YGL163C                                          | RAD54         | YGL148W                 | ARO2          |
| YPL105C                                          | YPL105C       | YEL053C                 | MAK10         |
| YNL199C                                          | GCR2          | YPL246C                 | RBD2          |
| YBR089C-A                                        | NHP6B         | YPL248C                 | GAL4          |
| YKR099W                                          | BAS1          | YNL058C                 | YNL058C       |
| YMR313C                                          | TGL3          | YMR152W                 | YIM1          |
| YDR129C                                          | SAC6          | YJL029C                 | VPS53         |
| YKL126W                                          | YPK1          | YKR035W-A               | DID2          |
| YLR386W                                          | VAC14         | YLR254C                 | NDL1          |
| YJL006C                                          | CTK2          | YML112W                 | CTK3          |
| YDL083C                                          | RPS16B        | YEL060C                 | PRB1          |
| YDR379W                                          | RGA2          | YOR275C                 | RIM20         |
| YBL051C                                          | PIN4          | YOR023C                 | AHC1          |
| YNR052C                                          | POP2          | YDL155W                 | CLB3          |
| YEL053C                                          | MAK10         | YBR280C                 | SAF1          |
| YIR005W                                          | IST3          | YPL018W                 | CTF19         |
| YNL243W                                          | SLA2          | YCR009C                 | RVS161        |
| YIL076W                                          | SEC28         | YOR308C                 | SNU66         |
| YPL042C                                          | SSN3          | YDR363W-A               | SEM1          |
| YBR290W                                          | BSD2          | YJR032W                 | CPR7          |
| YOR275C                                          | RIM20         | YHR200W                 | RPN10         |
| YDL020C                                          | RPN4          | YLR024C                 | UBR2          |
| YLR452C                                          | SST2          | YGL115W                 | SNF4          |
| YJR056C                                          | YJR056C       | YGL124C                 | MON1          |
| YML001W                                          | YPT7          | YOR066W                 | MSA1          |
| YHR108W                                          | GGA2          | YLR306W                 | UBC12         |
| YHR060W                                          | VMA22         | YOR043W                 | WHI2          |
| YFR036W                                          | CDC26         | YBR019C                 | GAL10         |
| YPR084W                                          | YPR084W       | YMR004W                 | MVP1          |

| Predictions at threshold level 0.75 continued... |               |                         |               |
|--------------------------------------------------|---------------|-------------------------|---------------|
| Gene1 of predicted pair                          |               | Gene2 of predicted pair |               |
| Systematic Name                                  | Standard Name | Systematic Name         | Standard Name |
| YPL057C                                          | SUR1          | YCL037C                 | SRO9          |
| YMR224C                                          | MRE11         | YML112W                 | CTK3          |
| YIL076W                                          | SEC28         | YER040W                 | GLN3          |
| YML001W                                          | YPT7          | YMR054W                 | STV1          |
| YDL184C                                          | RPL41A        | YHR039C-A               | VMA10         |
| YGL078C                                          | DBP3          | YGL025C                 | PGD1          |
| YBR173C                                          | UMP1          | YBR030W                 | YBR030W       |
| YBL101C                                          | ECM21         | YMR089C                 | YTA12         |
| YBR019C                                          | GAL10         | YMR214W                 | SCJ1          |
| YNL201C                                          | PSY2          | YBR200W                 | BEM1          |
| YCL037C                                          | SRO9          | YEL013W                 | VAC8          |
| YOR140W                                          | SFL1          | YER049W                 | TPA1          |
| YMR116C                                          | ASC1          | YBR200W                 | BEM1          |
| YLR386W                                          | VAC14         | YJL190C                 | RPS22A        |
| YGL237C                                          | HAP2          | YPL161C                 | BEM4          |
| YHR156C                                          | LIN1          | YER122C                 | GLO3          |
| YPR120C                                          | CLB5          | YGL148W                 | ARO2          |
| YOR043W                                          | WHI2          | YGL163C                 | RAD54         |
| YOL111C                                          | MDY2          | YGL115W                 | SNF4          |
| YER116C                                          | SLX8          | YML071C                 | COG8          |
| YBR194W                                          | SOY1          | YOR038C                 | HIR2          |
| YIL159W                                          | BNR1          | YBL058W                 | SHP1          |
| YPL001W                                          | HAT1          | YGL148W                 | ARO2          |
| YMR116C                                          | ASC1          | YEL044W                 | IES6          |
| YMR055C                                          | BUB2          | YML112W                 | CTK3          |
| YIL076W                                          | SEC28         | YOR080W                 | DIA2          |
| YFR030W                                          | MET10         | YNL225C                 | CNM67         |
| YGL078C                                          | DBP3          | YHR200W                 | RPN10         |
| YJL210W                                          | PEX2          | YLR191W                 | PEX13         |

| Predictions at threshold level 0.75 continued... |               |                         |               |
|--------------------------------------------------|---------------|-------------------------|---------------|
| Gene1 of predicted pair                          |               | Gene2 of predicted pair |               |
| Systematic Name                                  | Standard Name | Systematic Name         | Standard Name |
| YPR052C                                          | NHP6A         | YNL031C                 | HHT2          |
| YAL024C                                          | LTE1          | YHR178W                 | STB5          |
| YHR013C                                          | ARD1          | YDL155W                 | CLB3          |
| YNL166C                                          | BNI5          | YIL008W                 | URM1          |
| YIL159W                                          | BNR1          | YJL183W                 | MNN11         |
| YKR020W                                          | VPS51         | YPL045W                 | VPS16         |
| YIL076W                                          | SEC28         | YMR311C                 | GLC8          |
| YOR337W                                          | TEA1          | YMR153W                 | NUP53         |
| YBR274W                                          | CHK1          | YMR055C                 | BUB2          |
| YKL126W                                          | YPK1          | YOL111C                 | MDY2          |
| YFL023W                                          | BUD27         | YBR036C                 | CSG2          |
| YIL159W                                          | BNR1          | YGR249W                 | MGA1          |
| YLR234W                                          | TOP3          | YMR055C                 | BUB2          |
| YNL054W                                          | VAC7          | YJL006C                 | CTK2          |
| YGL033W                                          | HOP2          | YFR010W                 | UBP6          |
| YGL060W                                          | YBP2          | YGL003C                 | CDH1          |
| YGL212W                                          | VAM7          | YPL120W                 | VPS30         |
| YLR399C                                          | BDF1          | YDR183W                 | PLP1          |
| YLR381W                                          | CTF3          | YNL116W                 | DMA2          |
| YDR225W                                          | HTA1          | YPL018W                 | CTF19         |
| YCR020C-A                                        | MAK31         | YHR012W                 | VPS29         |
| YHR013C                                          | ARD1          | YML028W                 | TSA1          |
| YNL288W                                          | CAF40         | YOR023C                 | AHC1          |
| YLL039C                                          | UBI4          | YHL002W                 | HSE1          |
| YMR284W                                          | YKU70         | YBL019W                 | APN2          |
| YPR049C                                          | ATG11         | YKL103C                 | LAP4          |
| YBR108W                                          | YBR108W       | YOR066W                 | MSA1          |
| YMR153W                                          | NUP53         | YLR094C                 | GIS3          |
| YDR378C                                          | LSM6          | YOL081W                 | IRA2          |

| Predictions at threshold level 0.75 continued... |               |                         |               |
|--------------------------------------------------|---------------|-------------------------|---------------|
| Gene1 of predicted pair                          |               | Gene2 of predicted pair |               |
| Systematic Name                                  | Standard Name | Systematic Name         | Standard Name |
| YBL047C                                          | EDE1          | YHR158C                 | KEL1          |
| YKL139W                                          | CTK1          | YGL025C                 | PGD1          |
| YLR386W                                          | VAC14         | YHR039C-A               | VMA10         |
| YCR020C-A                                        | MAK31         | YPL037C                 | EGD1          |
| YML095C                                          | RAD10         | YGR188C                 | BUB1          |
| YPL253C                                          | VIK1          | YJL190C                 | RPS22A        |
| YKR061W                                          | KTR2          | YBR107C                 | IML3          |
| YGL237C                                          | HAP2          | YPL018W                 | CTF19         |
| YDR103W                                          | STE5          | YGR152C                 | RSR1          |
| YEL065W                                          | SIT1          | YPL161C                 | BEM4          |
| YNL069C                                          | RPL16B        | YGR105W                 | VMA21         |
| YPL203W                                          | TPK2          | YIL033C                 | BCY1          |
| YMR004W                                          | MVP1          | YPL105C                 | YPL105C       |
| YGL147C                                          | RPL9A         | YGL003C                 | CDH1          |
| YHL031C                                          | GOS1          | YDR335W                 | MSN5          |
| YNL248C                                          | RPA49         | YDR335W                 | MSN5          |
| YLR410W                                          | VIP1          | YPL018W                 | CTF19         |
| YOR076C                                          | SKI7          | YGR071C                 | YGR071C       |
| YBR057C                                          | MUM2          | YBL047C                 | EDE1          |
| YLR386W                                          | VAC14         | YJR060W                 | CBF1          |
| YGL087C                                          | MMS2          | YLR360W                 | VPS38         |
| YJR140C                                          | HIR3          | YNL199C                 | GCR2          |
| YLR398C                                          | SKI2          | YBR280C                 | SAF1          |
| YJL078C                                          | PRY3          | YJR106W                 | ECM27         |
| YJR056C                                          | YJR056C       | YHR200W                 | RPN10         |
| YDR202C                                          | RAV2          | YER162C                 | RAD4          |
| YJR032W                                          | CPR7          | YDR358W                 | GGA1          |
| YNL032W                                          | SIW14         | YMR153W                 | NUP53         |
| YGR152C                                          | RSR1          | YDR310C                 | SUM1          |

| Predictions at threshold level 0.75 continued... |               |                         |               |
|--------------------------------------------------|---------------|-------------------------|---------------|
| Gene1 of predicted pair                          |               | Gene2 of predicted pair |               |
| Systematic Name                                  | Standard Name | Systematic Name         | Standard Name |
| YKR095W                                          | MLP1          | YMR273C                 | ZDS1          |
| YIL076W                                          | SEC28         | YJR033C                 | RAV1          |
| YHR134W                                          | WSS1          | YDR310C                 | SUM1          |
| YFR031C-A                                        | RPL2A         | YNL069C                 | RPL16B        |
| YJR063W                                          | RPA12         | YLR254C                 | NDL1          |
| YJL124C                                          | LSM1          | YHR111W                 | UBA4          |
| YDR484W                                          | VPS52         | YDL192W                 | ARF1          |
| YJL036W                                          | SNX4          | YNL107W                 | YAF9          |
| YNL264C                                          | PDR17         | YDR363W-A               | SEM1          |
| YJR125C                                          | ENT3          | YOR327C                 | SNC2          |
| YDR261C                                          | EXG2          | YBL025W                 | RRN10         |
| YNL079C                                          | TPM1          | YHL002W                 | HSE1          |
| YBR082C                                          | UBC4          | YAL002W                 | VPS8          |
| YNL215W                                          | IES2          | YLR399C                 | BDF1          |
| YNL201C                                          | PSY2          | YLR399C                 | BDF1          |
| YJL176C                                          | SWI3          | YNL106C                 | INP52         |
| YMR231W                                          | PEP5          | YGL095C                 | VPS45         |
| YBR126C                                          | TPS1          | YDR207C                 | UME6          |
| YGR270W                                          | YTA7          | YGL253W                 | HXK2          |
| YNL218W                                          | MGS1          | YOL090W                 | MSH2          |
| YLR410W                                          | VIP1          | YBR082C                 | UBC4          |
| YNL201C                                          | PSY2          | YLR079W                 | SIC1          |
| YGL147C                                          | RPL9A         | YJR032W                 | CPR7          |
| YDL047W                                          | SIT4          | YAL030W                 | SNC1          |
| YDR137W                                          | RGP1          | YAL055W                 | PEX22         |
| YNL094W                                          | APP1          | YBL106C                 | SRO77         |
| YPR046W                                          | MCM16         | YOL067C                 | RTG1          |
| YFR031C-A                                        | RPL2A         | YMR133W                 | REC114        |
| YOR023C                                          | AHC1          | YDR318W                 | MCM21         |

| Predictions at threshold level 0.75 continued... |               |                         |               |
|--------------------------------------------------|---------------|-------------------------|---------------|
| Gene1 of predicted pair                          |               | Gene2 of predicted pair |               |
| Systematic Name                                  | Standard Name | Systematic Name         | Standard Name |
| YHR039C-A                                        | VMA10         | YLR309C                 | IMH1          |
| YNL297C                                          | MON2          | YDR440W                 | DOT1          |
| YPR029C                                          | APL4          | YKL135C                 | APL2          |
| YIR005W                                          | IST3          | YEL013W                 | VAC8          |
| YLR273C                                          | PIG1          | YLR258W                 | GSY2          |
| YNL139C                                          | RLR1          | YKL139W                 | CTK1          |
| YLR410W                                          | VIP1          | YPR046W                 | MCM16         |
| YBL058W                                          | SHP1          | YBR019C                 | GAL10         |
| YBL058W                                          | SHP1          | YLR192C                 | HCR1          |
| YMR153W                                          | NUP53         | YMR230W                 | RPS10B        |
| YPR036W                                          | VMA13         | YJL183W                 | MNN11         |
| YLR410W                                          | VIP1          | YHR115C                 | DMA1          |
| YMR004W                                          | MVP1          | YER122C                 | GLO3          |
| YDR293C                                          | SSD1          | YCR077C                 | PAT1          |
| YOR043W                                          | WHI2          | YGL124C                 | MON1          |
| YDR202C                                          | RAV2          | YCL001W                 | RER1          |
| YLR386W                                          | VAC14         | YOL067C                 | RTG1          |
| YMR127C                                          | SAS2          | YHR012W                 | VPS29         |
| YOL111C                                          | MDY2          | YJR032W                 | CPR7          |
| YPL137C                                          | GIP3          | YOL081W                 | IRA2          |
| YHR205W                                          | SCH9          | YHR030C                 | SLT2          |
| YML016C                                          | PPZ1          | YDR378C                 | LSM6          |
| YBR057C                                          | MUM2          | YPL253C                 | VIK1          |
| YBR057C                                          | MUM2          | YHR013C                 | ARD1          |
| YJL187C                                          | SWE1          | YGL031C                 | RPL24A        |
| YNL031C                                          | HHT2          | YMR273C                 | ZDS1          |
| YKR057W                                          | RPS21A        | YKL032C                 | IXR1          |
| YHR111W                                          | UBA4          | YJL006C                 | CTK2          |
| YBR065C                                          | ECM2          | YGR006W                 | PRP18         |

| Predictions at threshold level 0.75 continued... |               |                         |               |
|--------------------------------------------------|---------------|-------------------------|---------------|
| Gene1 of predicted pair                          |               | Gene2 of predicted pair |               |
| Systematic Name                                  | Standard Name | Systematic Name         | Standard Name |
| YER049W                                          | TPA1          | YDR207C                 | UME6          |
| YPL256C                                          | CLN2          | YOR368W                 | RAD17         |
| YLR313C                                          | SPH1          | YML028W                 | TSA1          |
| YFR010W                                          | UBP6          | YLR370C                 | ARC18         |
| YPR051W                                          | MAK3          | YGR105W                 | VMA21         |
| YNR072W                                          | HXT17         | YLR320W                 | MMS22         |
| YGL147C                                          | RPL9A         | YDR484W                 | VPS52         |
| YGL135W                                          | RPL1B         | YAL055W                 | PEX22         |
| YNL044W                                          | YIP3          | YJR033C                 | RAV1          |
| YKR072C                                          | SIS2          | YBR195C                 | MSI1          |
| YER139C                                          | YER139C       | YLR350W                 | ORM2          |
| YDL160C                                          | DHH1          | YKL114C                 | APN1          |
| YBR108W                                          | YBR108W       | YDL077C                 | VAM6          |
| YMR153W                                          | NUP53         | YNR072W                 | HXT17         |
| YOR001W                                          | RRP6          | YPL018W                 | CTF19         |
| YBL102W                                          | SFT2          | YHL031C                 | GOS1          |
| YLR315W                                          | NKP2          | YOR124C                 | UBP2          |
| YLR119W                                          | SRN2          | YBR108W                 | YBR108W       |
| YDR363W-A                                        | SEM1          | YFR036W                 | CDC26         |
| YML097C                                          | VPS9          | YBR181C                 | RPS6B         |
| YDR448W                                          | ADA2          | YDR216W                 | ADR1          |
| YMR026C                                          | PEX12         | YGR249W                 | MGA1          |
| YER096W                                          | SHC1          | YMR055C                 | BUB2          |
| YBL102W                                          | SFT2          | YGL212W                 | VAM7          |
| YBL021C                                          | HAP3          | YPL253C                 | VIK1          |
| YDL184C                                          | RPL41A        | YPL195W                 | APL5          |
| YJL060W                                          | BNA3          | YNL236W                 | SIN4          |
| YDR137W                                          | RGP1          | YNL051W                 | COG5          |
| YDR293C                                          | SSD1          | YIL038C                 | NOT3          |

| Predictions at threshold level 0.75 continued... |               |                         |               |
|--------------------------------------------------|---------------|-------------------------|---------------|
| Gene1 of predicted pair                          |               | Gene2 of predicted pair |               |
| Systematic Name                                  | Standard Name | Systematic Name         | Standard Name |
| YPL022W                                          | RAD1          | YPL106C                 | SSE1          |
| YFR031C-A                                        | RPL2A         | YDL006W                 | PTC1          |
| YCR086W                                          | CSM1          | YNL225C                 | CNM67         |
| YLR090W                                          | XDJ1          | YOR035C                 | SHE4          |
| YOR023C                                          | AHC1          | YCR086W                 | CSM1          |
| YGL066W                                          | SGF73         | YLR102C                 | APC9          |
| YDR129C                                          | SAC6          | YER122C                 | GLO3          |
| YMR142C                                          | RPL13B        | YNL238W                 | KEX2          |
| YJL176C                                          | SWI3          | YDR440W                 | DOT1          |
| YGL174W                                          | BUD13         | YJR050W                 | ISY1          |
| YDL013W                                          | SLX5          | YOR368W                 | RAD17         |
| YKR001C                                          | VPS1          | YKR030W                 | GMH1          |
| YJR033C                                          | RAV1          | YAL002W                 | VPS8          |
| YML095C                                          | RAD10         | YJL006C                 | CTK2          |
| YNL106C                                          | INP52         | YHR167W                 | THP2          |
| YOR001W                                          | RRP6          | YDR289C                 | RTT103        |
| YDR456W                                          | NHX1          | YNL079C                 | TPM1          |
| YLR119W                                          | SRN2          | YOL111C                 | MDY2          |
| YNL087W                                          | TCB2          | YOL121C                 | RPS19A        |
| YJL136C                                          | RPS21B        | YGR135W                 | PRE9          |
| YPL024W                                          | RMI1          | YLR386W                 | VAC14         |
| YER144C                                          | UBP5          | YDL223C                 | HBT1          |
| YBR171W                                          | SEC66         | YLR371W                 | ROM2          |
| YML103C                                          | NUP188        | YHR115C                 | DMA1          |
| YML071C                                          | COG8          | YMR152W                 | YIM1          |
| YBR041W                                          | FAT1          | YKL048C                 | ELM1          |
| YAL024C                                          | LTE1          | YNL293W                 | MSB3          |
| YNL087W                                          | TCB2          | YJL172W                 | CPS1          |
| YNL229C                                          | URE2          | YNL116W                 | DMA2          |



| Predictions at threshold level 0.75 continued... |               |                         |               |
|--------------------------------------------------|---------------|-------------------------|---------------|
| Gene1 of predicted pair                          |               | Gene2 of predicted pair |               |
| Systematic Name                                  | Standard Name | Systematic Name         | Standard Name |
| YKR035W-A                                        | DID2          | YMR152W                 | YIM1          |
| YDR318W                                          | MCM21         | YGL252C                 | RTG2          |
| YJL172W                                          | CPS1          | YPL195W                 | APL5          |
| YNR052C                                          | POP2          | YNL307C                 | MCK1          |
| YDR080W                                          | VPS41         | YML071C                 | COG8          |
| YDR363W-A                                        | SEM1          | YGL003C                 | CDH1          |
| YLR441C                                          | RPS1A         | YER044C                 | ERG28         |
| YPL161C                                          | BEM4          | YMR089C                 | YTA12         |
| YLR381W                                          | CTF3          | YDR260C                 | SWM1          |
| YML103C                                          | NUP188        | YIL103W                 | DPH1          |
| YLR119W                                          | SRN2          | YNL307C                 | MCK1          |
| YNL058C                                          | YNL058C       | YDR261C                 | EXG2          |
| YMR004W                                          | MVP1          | YDR080W                 | VPS41         |
| YDR171W                                          | HSP42         | YPL018W                 | CTF19         |
| YHR178W                                          | STB5          | YER110C                 | KAP123        |
| YLR452C                                          | SST2          | YLR398C                 | SKI2          |
| YBR270C                                          | BIT2          | YIL105C                 | SLM1          |
| YHR200W                                          | RPN10         | YPR046W                 | MCM16         |
| YDR004W                                          | RAD57         | YER161C                 | SPT2          |
| YNL069C                                          | RPL16B        | YPR051W                 | MAK3          |
| YGR241C                                          | YAP1802       | YKR020W                 | VPS51         |
| YKL101W                                          | HSL1          | YGL003C                 | CDH1          |
| YBL058W                                          | SHP1          | YBL103C                 | RTG3          |
| YJL006C                                          | CTK2          | YGL003C                 | CDH1          |
| YEL065W                                          | SIT1          | YNL325C                 | FIG4          |
| YKR059W                                          | TIF1          | YML016C                 | PPZ1          |
| YDL116W                                          | NUP84         | YMR125W                 | STO1          |
| YGL174W                                          | BUD13         | YNL107W                 | YAF9          |
| YDR293C                                          | SSD1          | YHR086W                 | NAM8          |

| Predictions at threshold level 0.75 continued... |               |                         |               |
|--------------------------------------------------|---------------|-------------------------|---------------|
| Gene1 of predicted pair                          |               | Gene2 of predicted pair |               |
| Systematic Name                                  | Standard Name | Systematic Name         | Standard Name |
| YPL024W                                          | RMI1          | YOR035C                 | SHE4          |
| YOR327C                                          | SNC2          | YAR014C                 | BUD14         |
| YBR171W                                          | SEC66         | YPL050C                 | MNN9          |
| YPR049C                                          | ATG11         | YPR119W                 | CLB2          |
| YJL006C                                          | CTK2          | YJL183W                 | MNN11         |
| YLR320W                                          | MMS22         | YML071C                 | COG8          |
| YJL060W                                          | BNA3          | YLR079W                 | SIC1          |
| YMR039C                                          | SUB1          | YBR107C                 | IML3          |
| YBR020W                                          | GAL1          | YHR200W                 | RPN10         |
| YBL103C                                          | RTG3          | YPR036W                 | VMA13         |
| YPL161C                                          | BEM4          | YLR371W                 | ROM2          |
| YGR249W                                          | MGA1          | YKR099W                 | BAS1          |
| YDR293C                                          | SSD1          | YOR109W                 | INP53         |
| YJR024C                                          | MDE1          | YIL148W                 | RPL40A        |
| YPL057C                                          | SUR1          | YDR137W                 | RGP1          |
| YOR023C                                          | AHC1          | YPL248C                 | GAL4          |
| YDR192C                                          | NUP42         | YER110C                 | KAP123        |
| YNL264C                                          | PDR17         | YNL236W                 | SIN4          |
| YLR079W                                          | SIC1          | YLR381W                 | CTF3          |
| YPL158C                                          | YPL158C       | YHR158C                 | KEL1          |
| YJL124C                                          | LSM1          | YGL151W                 | NUT1          |
| YGL025C                                          | PGD1          | YJL095W                 | BCK1          |
| YNL307C                                          | MCK1          | YPL161C                 | BEM4          |
| YGR019W                                          | UGA1          | YHR114W                 | BZZ1          |
| YOR080W                                          | DIA2          | YCR086W                 | CSM1          |
| YML115C                                          | VAN1          | YML097C                 | VPS9          |
| YLR452C                                          | SST2          | YML001W                 | YPT7          |
| YPR051W                                          | MAK3          | YDR289C                 | RTT103        |
| YMR142C                                          | RPL13B        | YML001W                 | YPT7          |

| Predictions at threshold level 0.75 continued... |               |                         |               |
|--------------------------------------------------|---------------|-------------------------|---------------|
| Gene1 of predicted pair                          |               | Gene2 of predicted pair |               |
| Systematic Name                                  | Standard Name | Systematic Name         | Standard Name |
| YMR016C                                          | SOK2          | YGL124C                 | MON1          |
| YER044C                                          | ERG28         | YBL025W                 | RRN10         |
| YKL126W                                          | YPK1          | YDL083C                 | RPS16B        |
| YNL068C                                          | FKH2          | YIL008W                 | URM1          |
| YMR133W                                          | REC114        | YHL022C                 | SPO11         |
| YBR082C                                          | UBC4          | YBR181C                 | RPS6B         |
| YPR018W                                          | RLF2          | YLR381W                 | CTF3          |
| YML007W                                          | YAP1          | YER110C                 | KAP123        |
| YGL212W                                          | VAM7          | YNL051W                 | COG5          |
| YMR224C                                          | MRE11         | YJR035W                 | RAD26         |
| YDL059C                                          | RAD59         | YML028W                 | TSA1          |
| YNR072W                                          | HXT17         | YGL124C                 | MON1          |
| YPR084W                                          | YPR084W       | YKR001C                 | VPS1          |
| YLR381W                                          | CTF3          | YGL115W                 | SNF4          |
| YLR452C                                          | SST2          | YFR036W                 | CDC26         |
| YJL154C                                          | VPS35         | YNL127W                 | FAR11         |
| YJL210W                                          | PEX2          | YDR142C                 | PEX7          |
| YHR013C                                          | ARD1          | YOR014W                 | RTS1          |
| YER162C                                          | RAD4          | YPR032W                 | SRO7          |
| YOR080W                                          | DIA2          | YNL236W                 | SIN4          |
| YJL006C                                          | CTK2          | YHR115C                 | DMA1          |
| YJL127C                                          | SPT10         | YJR060W                 | CBF1          |
| YPL057C                                          | SUR1          | YNL297C                 | MON2          |
| YJL172W                                          | CPS1          | YJR056C                 | YJR056C       |
| YOR279C                                          | RFM1          | YDR310C                 | SUM1          |
| YPL253C                                          | VIK1          | YHR013C                 | ARD1          |
| YPR018W                                          | RLF2          | YDR260C                 | SWM1          |
| YGL025C                                          | PGD1          | YDL077C                 | VAM6          |
| YDL077C                                          | VAM6          | YBR036C                 | CSG2          |

| Predictions at threshold level 0.75 continued... |               |                         |               |
|--------------------------------------------------|---------------|-------------------------|---------------|
| Gene1 of predicted pair                          |               | Gene2 of predicted pair |               |
| Systematic Name                                  | Standard Name | Systematic Name         | Standard Name |
| YLR093C                                          | NYV1          | YPL195W                 | APL5          |
| YJR056C                                          | YJR056C       | YJR032W                 | CPR7          |
| YDR507C                                          | GIN4          | YDR335W                 | MSN5          |
| YGL009C                                          | LEU1          | YPR119W                 | CLB2          |
| YLR234W                                          | TOP3          | YOL090W                 | MSH2          |
| YDR174W                                          | HMO1          | YKL110C                 | KTI12         |
| YPL253C                                          | VIK1          | YMR038C                 | CCS1          |
| YOL147C                                          | PEX11         | YDL078C                 | MDH3          |
| YNL201C                                          | PSY2          | YKR061W                 | KTR2          |
| YNR072W                                          | HXT17         | YMR133W                 | REC114        |
| YKL006W                                          | RPL14A        | YBL101C                 | ECM21         |
| YMR039C                                          | SUB1          | YPL024W                 | RMI1          |
| YGR072W                                          | UPF3          | YPL195W                 | APL5          |
| YGR081C                                          | SLX9          | YPL022W                 | RAD1          |
| YHR039C-A                                        | VMA10         | YLR093C                 | NYV1          |
| YHR171W                                          | ATG7          | YNL223W                 | ATG4          |
| YKR039W                                          | GAP1          | YCL018W                 | LEU2          |
| YBR195C                                          | MSI1          | YGL148W                 | ARO2          |
| YLR234W                                          | TOP3          | YOR023C                 | AHC1          |
| YBR173C                                          | UMP1          | YNL238W                 | KEX2          |
| YIL034C                                          | CAP2          | YCR077C                 | PAT1          |
| YDR174W                                          | HMO1          | YNL054W                 | VAC7          |
| YMR224C                                          | MRE11         | YDL223C                 | HBT1          |
| YHR012W                                          | VPS29         | YOR208W                 | PTP2          |
| YKR099W                                          | BAS1          | YPL195W                 | APL5          |
| YKR020W                                          | VPS51         | YBR082C                 | UBC4          |
| YER002W                                          | NOP16         | YKL009W                 | MRT4          |
| YHR178W                                          | STB5          | YDR155C                 | CPR1          |
| YBL008W                                          | HIR1          | YBR274W                 | CHK1          |

| Predictions at threshold level 0.75 continued... |               |                         |               |
|--------------------------------------------------|---------------|-------------------------|---------------|
| Gene1 of predicted pair                          |               | Gene2 of predicted pair |               |
| Systematic Name                                  | Standard Name | Systematic Name         | Standard Name |
| YOR195W                                          | SLK19         | YNL116W                 | DMA2          |
| YER027C                                          | GAL83         | YGL179C                 | TOS3          |
| YMR004W                                          | MVP1          | YHL020C                 | OPI1          |
| YNL297C                                          | MON2          | YDR207C                 | UME6          |
| YHR156C                                          | LIN1          | YEL060C                 | PRB1          |
| YDR443C                                          | SSN2          | YMR199W                 | CLN1          |
| YGL115W                                          | SNF4          | YDR261C                 | EXG2          |
| YKR072C                                          | SIS2          | YFL023W                 | BUD27         |
| YGL178W                                          | MPT5          | YLR452C                 | SST2          |
| YKL048C                                          | ELM1          | YGR188C                 | BUB1          |
| YBR200W                                          | BEM1          | YHR152W                 | SPO12         |
| YDR176W                                          | NGG1          | YGL252C                 | RTG2          |
| YDR335W                                          | MSN5          | YLR410W                 | VIP1          |
| YPR051W                                          | MAK3          | YHR114W                 | BZZ1          |
| YPR036W                                          | VMA13         | YGL124C                 | MON1          |
| YML071C                                          | COG8          | YNL051W                 | COG5          |
| YML001W                                          | YPT7          | YPR046W                 | MCM16         |
| YLR095C                                          | IOC2          | YEL053C                 | MAK10         |
| YFR010W                                          | UBP6          | YNL199C                 | GCR2          |
| YIL159W                                          | BNR1          | YLR441C                 | RPS1A         |
| YGL078C                                          | DBP3          | YOR035C                 | SHE4          |
| YLR386W                                          | VAC14         | YDL083C                 | RPS16B        |
| YDR202C                                          | RAV2          | YJR040W                 | GEF1          |
| YFR031C-A                                        | RPL2A         | YDR202C                 | RAV2          |
| YDR439W                                          | LRS4          | YJR060W                 | CBF1          |
| YGL215W                                          | CLG1          | YLR131C                 | ACE2          |
| YER116C                                          | SLX8          | YNL238W                 | KEX2          |
| YER001W                                          | MNN1          | YOR035C                 | SHE4          |
| YGL124C                                          | MON1          | YDL192W                 | ARF1          |

| Predictions at threshold level 0.75 continued... |               |                         |               |
|--------------------------------------------------|---------------|-------------------------|---------------|
| Gene1 of predicted pair                          |               | Gene2 of predicted pair |               |
| Systematic Name                                  | Standard Name | Systematic Name         | Standard Name |
| YLR135W                                          | SLX4          | YLR313C                 | SPH1          |
| YNL238W                                          | KEX2          | YER040W                 | GLN3          |
| YEL053C                                          | MAK10         | YMR133W                 | REC114        |
| YCR066W                                          | RAD18         | YML071C                 | COG8          |
| YGL163C                                          | RAD54         | YLR182W                 | SWI6          |
| YOR080W                                          | DIA2          | YER139C                 | YER139C       |
| YBR057C                                          | MUM2          | YNL291C                 | MID1          |
| YCR077C                                          | PAT1          | YHR167W                 | THP2          |
| YDR383C                                          | NKP1          | YLR386W                 | VAC14         |
| YLR192C                                          | HCR1          | YJR032W                 | CPR7          |
| YAL024C                                          | LTE1          | YKR061W                 | KTR2          |
| YEL065W                                          | SIT1          | YBR030W                 | YBR030W       |
| YER116C                                          | SLX8          | YBL103C                 | RTG3          |
| YEL050C                                          | RML2          | YMR202W                 | ERG2          |
| YLL039C                                          | UBI4          | YBR083W                 | TEC1          |
| YGL212W                                          | VAM7          | YER139C                 | YER139C       |
| YOR106W                                          | VAM3          | YJL095W                 | BCK1          |
| YLR094C                                          | GIS3          | YOR327C                 | SNC2          |
| YJL151C                                          | SNA3          | YPL246C                 | RBD2          |
| YML012W                                          | ERV25         | YFL048C                 | EMP47         |
| YDR477W                                          | SNF1          | YNL238W                 | KEX2          |
| YMR016C                                          | SOK2          | YBR019C                 | GAL10         |
| YLR292C                                          | SEC72         | YJR135C                 | MCM22         |
| YDR293C                                          | SSD1          | YGL212W                 | VAM7          |
| YFR010W                                          | UBP6          | YMR142C                 | RPL13B        |
| YCL001W                                          | RER1          | YOL108C                 | INO4          |
| YGR275W                                          | RTT102        | YDR073W                 | SNF11         |
| YLR095C                                          | IOC2          | YDL083C                 | RPS16B        |
| YLR313C                                          | SPH1          | YDL223C                 | HBT1          |

| Predictions at threshold level 0.75 continued... |               |                         |               |
|--------------------------------------------------|---------------|-------------------------|---------------|
| Gene1 of predicted pair                          |               | Gene2 of predicted pair |               |
| Systematic Name                                  | Standard Name | Systematic Name         | Standard Name |
| YJL083W                                          | TAX4          | YIL002C                 | INP51         |
| YIL053W                                          | RHR2          | YLR119W                 | SRN2          |
| YKL139W                                          | CTK1          | YDR378C                 | LSM6          |
| YGR104C                                          | SRB5          | YLR425W                 | TUS1          |
| YLR191W                                          | PEX13         | YDL065C                 | PEX19         |
| YDR378C                                          | LSM6          | YLR425W                 | TUS1          |
| YKL114C                                          | APN1          | YLR032W                 | RAD5          |
| YKL117W                                          | SBA1          | YBL079W                 | NUP170        |
| YNL288W                                          | CAF40         | YHL002W                 | HSE1          |
| YMR192W                                          | GYL1          | YNL094W                 | APP1          |
| YBR173C                                          | UMP1          | YBR171W                 | SEC66         |
| YOR195W                                          | SLK19         | YNL248C                 | RPA49         |
| YIL103W                                          | DPH1          | YHR115C                 | DMA1          |
| YLL007C                                          | YLL007C       | YHR012W                 | VPS29         |
| YKL048C                                          | ELM1          | YNL229C                 | URE2          |
| YBL047C                                          | EDE1          | YKR048C                 | NAP1          |
| YMR224C                                          | MRE11         | YMR311C                 | GLC8          |
| YBR195C                                          | MSI1          | YER161C                 | SPT2          |
| YJL095W                                          | BCK1          | YOR014W                 | RTS1          |
| YOR080W                                          | DIA2          | YKL114C                 | APN1          |
| YPL042C                                          | SSN3          | YJR060W                 | CBF1          |
| YLR396C                                          | VPS33         | YPL195W                 | APL5          |
| YML001W                                          | YPT7          | YGL003C                 | CDH1          |
| YJL036W                                          | SNX4          | YGR020C                 | VMA7          |
| YDL020C                                          | RPN4          | YKL048C                 | ELM1          |
| YDR363W-A                                        | SEM1          | YDR264C                 | AKR1          |
| YBR030W                                          | YBR030W       | YLR370C                 | ARC18         |
| YGR104C                                          | SRB5          | YKL213C                 | DOA1          |
| YFR031C-A                                        | RPL2A         | YPL120W                 | VPS30         |

| Predictions at threshold level 0.75 continued... |               |                         |               |
|--------------------------------------------------|---------------|-------------------------|---------------|
| Gene1 of predicted pair                          |               | Gene2 of predicted pair |               |
| Systematic Name                                  | Standard Name | Systematic Name         | Standard Name |
| YNR052C                                          | POP2          | YML102W                 | CAC2          |
| YGL174W                                          | BUD13         | YPR101W                 | SNT309        |
| YNL025C                                          | SSN8          | YOR001W                 | RRP6          |
| YMR153W                                          | NUP53         | YDR137W                 | RGP1          |
| YGR040W                                          | KSS1          | YGL178W                 | MPT5          |
| YLR119W                                          | SRN2          | YBR173C                 | UMP1          |
| YPL057C                                          | SUR1          | YMR311C                 | GLC8          |
| YJL060W                                          | BNA3          | YJL006C                 | CTK2          |
| YMR153W                                          | NUP53         | YLR093C                 | NYV1          |
| YKL116C                                          | PRR1          | YBR036C                 | CSG2          |
| YDR192C                                          | NUP42         | YBL047C                 | EDE1          |
| YDR123C                                          | INO2          | YOL108C                 | INO4          |
| YBR030W                                          | YBR030W       | YDR207C                 | UME6          |
| YKL006W                                          | RPL14A        | YBL047C                 | EDE1          |
| YJL154C                                          | VPS35         | YER096W                 | SHC1          |
| YLR090W                                          | XDJ1          | YFR036W                 | CDC26         |
| YCR066W                                          | RAD18         | YOR368W                 | RAD17         |
| YPL057C                                          | SUR1          | YDL077C                 | VAM6          |
| YLR119W                                          | SRN2          | YKL139W                 | CTK1          |
| YLR360W                                          | VPS38         | YPL256C                 | CLN2          |
| YOR008C                                          | SLG1          | YNL079C                 | TPM1          |
| YPL024W                                          | RMI1          | YHR081W                 | LRP1          |
| YLR288C                                          | MEC3          | YBR195C                 | MSI1          |
| YPL042C                                          | SSN3          | YLR350W                 | ORM2          |
| YMR026C                                          | PEX12         | YOR043W                 | WHI2          |
| YKR072C                                          | SIS2          | YNL215W                 | IES2          |
| YMR004W                                          | MVP1          | YOR109W                 | INP53         |
| YIL140W                                          | AXL2          | YCR038C                 | BUD5          |
| YFR032C-A                                        | RPL29         | YLR371W                 | ROM2          |



| Predictions at threshold level 0.75 continued... |               |                         |               |
|--------------------------------------------------|---------------|-------------------------|---------------|
| Gene1 of predicted pair                          |               | Gene2 of predicted pair |               |
| Systematic Name                                  | Standard Name | Systematic Name         | Standard Name |
| YFL013C                                          | IES1          | YBR194W                 | SOY1          |
| YHR156C                                          | LIN1          | YKR035W-A               | DID2          |
| YOR112W                                          | CEX1          | YJL004C                 | SYS1          |
| YGR159C                                          | NSR1          | YOR375C                 | GDH1          |
| YBL047C                                          | EDE1          | YHL011C                 | PRS3          |
| YHR039C-A                                        | VMA10         | YNL051W                 | COG5          |
| YLR381W                                          | CTF3          | YDR310C                 | SUM1          |
| YML016C                                          | PPZ1          | YGR252W                 | GCN5          |
| YGR019W                                          | UGA1          | YLR381W                 | CTF3          |
| YCR081W                                          | SRB8          | YPL253C                 | VIK1          |
| YHL031C                                          | GOS1          | YNL127W                 | FAR11         |
| YML102W                                          | CAC2          | YLR352W                 | YLR352W       |
| YLR386W                                          | VAC14         | YKR099W                 | BAS1          |
| YLR315W                                          | NKP2          | YDR289C                 | RTT103        |
| YGL212W                                          | VAM7          | YNL079C                 | TPM1          |
| YKL139W                                          | CTK1          | YBR036C                 | CSG2          |
| YDR477W                                          | SNF1          | YER122C                 | GLO3          |
| YPR066W                                          | UBA3          | YJR099W                 | YUH1          |
| YFR036W                                          | CDC26         | YOL121C                 | RPS19A        |
| YJL060W                                          | BNA3          | YPL022W                 | RAD1          |
| YMR224C                                          | MRE11         | YDR192C                 | NUP42         |
| YIL036W                                          | CST6          | YDR378C                 | LSM6          |
| YDR225W                                          | HTA1          | YOR141C                 | ARP8          |
| YHR171W                                          | ATG7          | YNR049C                 | MSO1          |
| YDR176W                                          | NGG1          | YOL145C                 | CTR9          |
| YML115C                                          | VAN1          | YFL048C                 | EMP47         |
| YJL053W                                          | PEP8          | YJR040W                 | GEF1          |
| YOR127W                                          | RGA1          | YNL297C                 | MON2          |
| YMR139W                                          | RIM11         | YJL106W                 | IME2          |

| Predictions at threshold level 0.75 continued... |               |                         |               |
|--------------------------------------------------|---------------|-------------------------|---------------|
| Gene1 of predicted pair                          |               | Gene2 of predicted pair |               |
| Systematic Name                                  | Standard Name | Systematic Name         | Standard Name |
| YDR477W                                          | SNF1          | YHR205W                 | SCH9          |
| YMR054W                                          | STV1          | YDR310C                 | SUM1          |
| YML071C                                          | COG8          | YNR032W                 | PPG1          |
| YGL151W                                          | NUT1          | YDR310C                 | SUM1          |
| YLR119W                                          | SRN2          | YMR152W                 | YIM1          |
| YLR410W                                          | VIP1          | YIL103W                 | DPH1          |
| YOR127W                                          | RGA1          | YKR001C                 | VPS1          |
| YPL096C-A                                        | ERI1          | YDR388W                 | RVS167        |
| YDR254W                                          | CHL4          | YHR114W                 | BZZ1          |
| YNL288W                                          | CAF40         | YOR127W                 | RGA1          |
| YCL001W                                          | RER1          | YPL120W                 | VPS30         |
| YGL071W                                          | AFT1          | YPL240C                 | HSP82         |
| YGL115W                                          | SNF4          | YLR410W                 | VIP1          |
| YDL160C                                          | DHH1          | YGL190C                 | CDC55         |
| YOR066W                                          | MSA1          | YDL077C                 | VAM6          |
| YOR080W                                          | DIA2          | YDR440W                 | DOT1          |
| YFR010W                                          | UBP6          | YOR195W                 | SLK19         |
| YJL095W                                          | BCK1          | YLR370C                 | ARC18         |
| YOR043W                                          | WHI2          | YBL025W                 | RRN10         |
| YBR126C                                          | TPS1          | YKL204W                 | EAP1          |
| YNL166C                                          | BNI5          | YOR358W                 | HAP5          |
| YOR035C                                          | SHE4          | YCR053W                 | THR4          |
| YDR261C                                          | EXG2          | YDR358W                 | GGA1          |
| YNL307C                                          | MCK1          | YDL013W                 | SLX5          |
| YDL077C                                          | VAM6          | YMR311C                 | GLC8          |
| YGL200C                                          | EMP24         | YKR039W                 | GAP1          |
| YJL053W                                          | PEP8          | YJL204C                 | RCY1          |
| YDR171W                                          | HSP42         | YDL226C                 | GCS1          |
| YNL087W                                          | TCB2          | YDL192W                 | ARF1          |

| Predictions at threshold level 0.75 continued... |               |                         |               |
|--------------------------------------------------|---------------|-------------------------|---------------|
| Gene1 of predicted pair                          |               | Gene2 of predicted pair |               |
| Systematic Name                                  | Standard Name | Systematic Name         | Standard Name |
| YGL147C                                          | RPL9A         | YNL238W                 | KEX2          |
| YPL050C                                          | MNN9          | YOR312C                 | RPL20B        |
| YLR337C                                          | VRP1          | YNL107W                 | YAF9          |
| YOR001W                                          | RRP6          | YOR308C                 | SNU66         |
| YDR484W                                          | VPS52         | YDL226C                 | GCS1          |
| YBR215W                                          | HPC2          | YGL163C                 | RAD54         |
| YML028W                                          | TSA1          | YGR188C                 | BUB1          |
| YKL048C                                          | ELM1          | YGL179C                 | TOS3          |
| YJL151C                                          | SNA3          | YBR239C                 | YBR239C       |
| YJR024C                                          | MDE1          | YLR079W                 | SIC1          |
| YGR270W                                          | YTA7          | YLR410W                 | VIP1          |
| YHL020C                                          | OPI1          | YOL018C                 | TLG2          |
| YER115C                                          | SPR6          | YMR164C                 | MSS11         |
| YPL161C                                          | BEM4          | YLR425W                 | TUS1          |
| YGL163C                                          | RAD54         | YJL006C                 | CTK2          |
| YIL076W                                          | SEC28         | YDR289C                 | RTT103        |
| YKR035W-A                                        | DID2          | YEL053C                 | MAK10         |
| YHR108W                                          | GGA2          | YDL137W                 | ARF2          |
| YJR032W                                          | CPR7          | YDL077C                 | VAM6          |
| YDL116W                                          | NUP84         | YGR270W                 | YTA7          |
| YJL183W                                          | MNN11         | YHL002W                 | HSE1          |
| YDR004W                                          | RAD57         | YHR039C-A               | VMA10         |
| YJL004C                                          | SYS1          | YDL077C                 | VAM6          |
| YBR240C                                          | THI2          | YKL139W                 | CTK1          |
| YOR270C                                          | VPH1          | YJR033C                 | RAV1          |
| YDR477W                                          | SNF1          | YNL325C                 | FIG4          |
| YLR441C                                          | RPS1A         | YPL195W                 | APL5          |
| YHR156C                                          | LIN1          | YDR484W                 | VPS52         |
| YLR410W                                          | VIP1          | YCR086W                 | CSM1          |

| Predictions at threshold level 0.75 continued... |               |                         |               |
|--------------------------------------------------|---------------|-------------------------|---------------|
| Gene1 of predicted pair                          |               | Gene2 of predicted pair |               |
| Systematic Name                                  | Standard Name | Systematic Name         | Standard Name |
| YDR484W                                          | VPS52         | YLR094C                 | GIS3          |
| YDR004W                                          | RAD57         | YLR018C                 | POM34         |
| YGR133W                                          | PEX4          | YHR013C                 | ARD1          |
| YOR140W                                          | SFL1          | YNL199C                 | GCR2          |
| YMR224C                                          | MRE11         | YMR231W                 | PEP5          |
| YGL163C                                          | RAD54         | YGL031C                 | RPL24A        |
| YOR270C                                          | VPH1          | YDR137W                 | RGP1          |
| YMR026C                                          | PEX12         | YLR370C                 | ARC18         |
| YBR127C                                          | VMA2          | YLR396C                 | VPS33         |
| YGR261C                                          | APL6          | YAL002W                 | VPS8          |
| YMR022W                                          | UBC7          | YNL051W                 | COG5          |
| YJR024C                                          | MDE1          | YMR273C                 | ZDS1          |
| YPL161C                                          | BEM4          | YOL067C                 | RTG1          |
| YMR026C                                          | PEX12         | YDR477W                 | SNF1          |
| YPL057C                                          | SUR1          | YIR005W                 | IST3          |
| YJR140C                                          | HIR3          | YDR440W                 | DOT1          |
| YOL121C                                          | RPS19A        | YPR046W                 | MCM16         |
| YCR020C-A                                        | MAK31         | YGR261C                 | APL6          |
| YNL288W                                          | CAF40         | YBR108W                 | YBR108W       |
| YNL215W                                          | IES2          | YNL264C                 | PDR17         |
| YDR225W                                          | HTA1          | YPR119W                 | CLB2          |
| YHR200W                                          | RPN10         | YLR421C                 | RPN13         |
| YDL020C                                          | RPN4          | YGR054W                 | YGR054W       |
| YGR072W                                          | UPF3          | YOR127W                 | RGA1          |
| YBR200W                                          | BEM1          | YDR155C                 | CPR1          |
| YPL140C                                          | MKK2          | YOR208W                 | PTP2          |
| YNL291C                                          | MID1          | YHR200W                 | RPN10         |
| YGR249W                                          | MGA1          | YOR035C                 | SHE4          |
| YDR004W                                          | RAD57         | YDL020C                 | RPN4          |

| Predictions at threshold level 0.75 continued... |               |                         |               |
|--------------------------------------------------|---------------|-------------------------|---------------|
| Gene1 of predicted pair                          |               | Gene2 of predicted pair |               |
| Systematic Name                                  | Standard Name | Systematic Name         | Standard Name |
| YGL133W                                          | ITC1          | YNL206C                 | RTT106        |
| YMR311C                                          | GLC8          | YDR310C                 | SUM1          |
| YKL126W                                          | YPK1          | YCR053W                 | THR4          |
| YIL076W                                          | SEC28         | YDR261C                 | EXG2          |
| YOR312C                                          | RPL20B        | YNL079C                 | TPM1          |
| YBL058W                                          | SHP1          | YBR108W                 | YBR108W       |
| YLR227C                                          | ADY4          | YNL225C                 | CNM67         |
| YJR132W                                          | NMD5          | YPR119W                 | CLB2          |
| YDL065C                                          | PEX19         | YLR452C                 | SST2          |
| YIL034C                                          | CAP2          | YGL252C                 | RTG2          |
| YNL069C                                          | RPL16B        | YOR132W                 | VPS17         |
| YKR035W-A                                        | DID2          | YLR398C                 | SKI2          |
| YKR072C                                          | SIS2          | YGL148W                 | ARO2          |
| YMR004W                                          | MVP1          | YAL002W                 | VPS8          |
| YOR337W                                          | TEA1          | YEL053C                 | MAK10         |
| YOR327C                                          | SNC2          | YER122C                 | GLO3          |
| YBR019C                                          | GAL10         | YJL095W                 | BCK1          |
| YPL001W                                          | HAT1          | YKR001C                 | VPS1          |
| YFR021W                                          | ATG18         | YJR025C                 | BNA1          |
| YEL051W                                          | VMA8          | YAL002W                 | VPS8          |
| YML102W                                          | CAC2          | YMR038C                 | CCS1          |
| YOR112W                                          | CEX1          | YOR109W                 | INP53         |
| YFR031C-A                                        | RPL2A         | YJR040W                 | GEF1          |
| YDR439W                                          | LRS4          | YDR318W                 | MCM21         |
| YPL161C                                          | BEM4          | YER122C                 | GLO3          |
| YIL076W                                          | SEC28         | YEL013W                 | VAC8          |
| YML016C                                          | PPZ1          | YHR111W                 | UBA4          |
| YNL087W                                          | TCB2          | YER044C                 | ERG28         |
| YLR064W                                          | YLR064W       | YMR253C                 | YMR253C       |

| Predictions at threshold level 0.75 continued... |               |                         |               |
|--------------------------------------------------|---------------|-------------------------|---------------|
| Gene1 of predicted pair                          |               | Gene2 of predicted pair |               |
| Systematic Name                                  | Standard Name | Systematic Name         | Standard Name |
| YIL053W                                          | RHR2          | YAR014C                 | BUD14         |
| YNL297C                                          | MON2          | YDL192W                 | ARF1          |
| YJL060W                                          | BNA3          | YMR202W                 | ERG2          |
| YNL106C                                          | INP52         | YNL225C                 | CNM67         |
| YBL102W                                          | SFT2          | YLR309C                 | IMH1          |
| YBR108W                                          | YBR108W       | YGL124C                 | MON1          |
| YNL291C                                          | MID1          | YNL107W                 | YAF9          |
| YMR109W                                          | MYO5          | YPL161C                 | BEM4          |
| YLR079W                                          | SIC1          | YFR036W                 | CDC26         |
| YBR108W                                          | YBR108W       | YGR054W                 | YGR054W       |
| YJR140C                                          | HIR3          | YGR270W                 | YTA7          |
| YDL080C                                          | THI3          | YER139C                 | YER139C       |
| YIL076W                                          | SEC28         | YCL001W                 | RER1          |
| YDR477W                                          | SNF1          | YPR119W                 | CLB2          |
| YIR025W                                          | MND2          | YDR260C                 | SWM1          |
| YER161C                                          | SPT2          | YDR289C                 | RTT103        |
| YHR108W                                          | GGA2          | YOL081W                 | IRA2          |
| YIL156W                                          | UBP7          | YCR024C-A               | PMP1          |
| YLR119W                                          | SRN2          | YOR043W                 | WHI2          |
| YGL161C                                          | YIP5          | YEL056W                 | HAT2          |
| YBR041W                                          | FAT1          | YER044C                 | ERG28         |
| YOR275C                                          | RIM20         | YPL089C                 | RLM1          |
| YCR020C-A                                        | MAK31         | YKR001C                 | VPS1          |
| YPL057C                                          | SUR1          | YER040W                 | GLN3          |
| YDL184C                                          | RPL41A        | YGL212W                 | VAM7          |
| YMR199W                                          | CLN1          | YMR052W                 | FAR3          |
| YFR031C-A                                        | RPL2A         | YPR051W                 | MAK3          |
| YGL078C                                          | DBP3          | YOR043W                 | WHI2          |
| YHR185C                                          | PFS1          | YDL020C                 | RPN4          |

| Predictions at threshold level 0.75 continued... |               |                         |               |
|--------------------------------------------------|---------------|-------------------------|---------------|
| Gene1 of predicted pair                          |               | Gene2 of predicted pair |               |
| Systematic Name                                  | Standard Name | Systematic Name         | Standard Name |
| YKL101W                                          | HSL1          | YMR038C                 | CCS1          |
| YDL020C                                          | RPN4          | YPR051W                 | MAK3          |
| YDL184C                                          | RPL41A        | YDR484W                 | VPS52         |
| YBL103C                                          | RTG3          | YOR066W                 | MSA1          |
| YPR089W                                          | YPR089W       | YBR283C                 | SSH1          |
| YJL127C                                          | SPT10         | YLR381W                 | CTF3          |
| YMR055C                                          | BUB2          | YNL225C                 | CNM67         |
| YKL025C                                          | PAN3          | YLR234W                 | TOP3          |
| YMR250W                                          | GAD1          | YPR119W                 | CLB2          |
| YOR132W                                          | VPS17         | YGR270W                 | YTA7          |
| YDR245W                                          | MNN10         | YMR089C                 | YTA12         |
| YER144C                                          | UBP5          | YBL103C                 | RTG3          |
| YDR443C                                          | SSN2          | YMR224C                 | MRE11         |
| YFR010W                                          | UBP6          | YKL116C                 | PRR1          |
| YDR358W                                          | GGA1          | YDL192W                 | ARF1          |
| YOR018W                                          | ROD1          | YMR243C                 | ZRC1          |
| YMR202W                                          | ERG2          | YDR200C                 | VPS64         |
| YDL013W                                          | SLX5          | YHR013C                 | ARD1          |
| YDR484W                                          | VPS52         | YPR036W                 | VMA13         |
| YLL007C                                          | YLL007C       | YDL155W                 | CLB3          |
| YOR337W                                          | TEA1          | YPR046W                 | MCM16         |
| YMR202W                                          | ERG2          | YDR254W                 | CHL4          |
| YBR264C                                          | YPT10         | YER074W-A               | YOS1          |
| YMR224C                                          | MRE11         | YCR053W                 | THR4          |
| YBR217W                                          | ATG12         | YER044C                 | ERG28         |
| YNL166C                                          | BNI5          | YGL124C                 | MON1          |
| YPR030W                                          | CSR2          | YMR311C                 | GLC8          |
| YNL307C                                          | MCK1          | YNL116W                 | DMA2          |
| YKL010C                                          | UFD4          | YGR135W                 | PRE9          |

| Predictions at threshold level 0.75 continued... |               |                         |               |
|--------------------------------------------------|---------------|-------------------------|---------------|
| Gene1 of predicted pair                          |               | Gene2 of predicted pair |               |
| Systematic Name                                  | Standard Name | Systematic Name         | Standard Name |
| YNL127W                                          | FAR11         | YKR030W                 | GMH1          |
| YGR270W                                          | YTA7          | YKL110C                 | KTI12         |
| YDL013W                                          | SLX5          | YOL090W                 | MSH2          |
| YOR023C                                          | AHC1          | YGR252W                 | GCN5          |
| YBL047C                                          | EDE1          | YNL229C                 | URE2          |
| YER129W                                          | SAK1          | YPL256C                 | CLN2          |
| YNL201C                                          | PSY2          | YDL101C                 | DUN1          |
| YPR131C                                          | NAT3          | YPL018W                 | CTF19         |
| YFR010W                                          | UBP6          | YFR036W                 | CDC26         |
| YBR194W                                          | SOY1          | YKL213C                 | DOA1          |
| YCR065W                                          | HCM1          | YMR055C                 | BUB2          |
| YJL058C                                          | BIT61         | YDR318W                 | MCM21         |
| YKR101W                                          | SIR1          | YBR009C                 | HHF1          |
| YBL021C                                          | HAP3          | YEL053C                 | MAK10         |
| YLR094C                                          | GIS3          | YOR035C                 | SHE4          |
| YLR095C                                          | IOC2          | YBR173C                 | UMP1          |
| YER107C                                          | GLE2          | YML103C                 | NUP188        |
| YGL025C                                          | PGD1          | YDR207C                 | UME6          |
| YHR039C-A                                        | VMA10         | YMR230W                 | RPS10B        |
| YLR018C                                          | POM34         | YDR137W                 | RGP1          |
| YLR090W                                          | XDJ1          | YDL223C                 | HBT1          |
| YBL103C                                          | RTG3          | YMR152W                 | YIM1          |
| YNL215W                                          | IES2          | YEL056W                 | HAT2          |
| YBR126C                                          | TPS1          | YDL192W                 | ARF1          |
| YER120W                                          | SCS2          | YMR054W                 | STV1          |
| YDR448W                                          | ADA2          | YPL248C                 | GAL4          |
| YPR120C                                          | CLB5          | YDR318W                 | MCM21         |
| YHR205W                                          | SCH9          | YOR008C                 | SLG1          |
| YLR410W                                          | VIP1          | YOL081W                 | IRA2          |



| Predictions at threshold level 0.75 continued... |               |                         |               |
|--------------------------------------------------|---------------|-------------------------|---------------|
| Gene1 of predicted pair                          |               | Gene2 of predicted pair |               |
| Systematic Name                                  | Standard Name | Systematic Name         | Standard Name |
| YDR439W                                          | LRS4          | YJL124C                 | LSM1          |
| YJL004C                                          | SYS1          | YHR016C                 | YSC84         |
| YBL008W                                          | HIR1          | YGR252W                 | GCN5          |
| YBR131W                                          | CCZ1          | YMR231W                 | PEP5          |
| YLR315W                                          | NKP2          | YCR077C                 | PAT1          |
| YPL057C                                          | SUR1          | YMR055C                 | BUB2          |
| YLR320W                                          | MMS22         | YFR036W                 | CDC26         |
| YML103C                                          | NUP188        | YOL126C                 | MDH2          |
| YPR051W                                          | MAK3          | YAR014C                 | BUD14         |
| YLR292C                                          | SEC72         | YLR386W                 | VAC14         |
| YLR094C                                          | GIS3          | YGL115W                 | SNF4          |
| YGL178W                                          | MPT5          | YBR200W                 | BEM1          |
| YDL065C                                          | PEX19         | YGR077C                 | PEX8          |
| YLR090W                                          | XDJ1          | YPL037C                 | EGD1          |
| YJL095W                                          | BCK1          | YNL090W                 | RHO2          |
| YMR016C                                          | SOK2          | YMR230W                 | RPS10B        |
| YDR363W-A                                        | SEM1          | YHR115C                 | DMA1          |
| YDL161W                                          | ENT1          | YDL226C                 | GCS1          |
| YPR029C                                          | APL4          | YDL006W                 | PTC1          |
| YLR170C                                          | APS1          | YOR069W                 | VPS5          |
| YJR024C                                          | MDE1          | YNL199C                 | GCR2          |
| YPR189W                                          | SKI3          | YPR119W                 | CLB2          |
| YML071C                                          | COG8          | YEL042W                 | GDA1          |
| YMR055C                                          | BUB2          | YJR135C                 | MCM22         |
| YIL105C                                          | SLM1          | YJL058C                 | BIT61         |
| YDR293C                                          | SSD1          | YNL288W                 | CAF40         |
| YPL105C                                          | YPL105C       | YEL051W                 | VMA8          |
| YLR018C                                          | POM34         | YBR042C                 | CST26         |
| YCR086W                                          | CSM1          | YLR233C                 | EST1          |

| Predictions at threshold level 0.75 continued... |               |                         |               |
|--------------------------------------------------|---------------|-------------------------|---------------|
| Gene1 of predicted pair                          |               | Gene2 of predicted pair |               |
| Systematic Name                                  | Standard Name | Systematic Name         | Standard Name |
| YFR010W                                          | UBP6          | YGL025C                 | PGD1          |
| YMR224C                                          | MRE11         | YAR014C                 | BUD14         |
| YDR293C                                          | SSD1          | YJL190C                 | RPS22A        |
| YDR254W                                          | CHL4          | YGL124C                 | MON1          |
| YNL238W                                          | KEX2          | YJR033C                 | RAV1          |
| YBR200W                                          | BEM1          | YPL234C                 | TFP3          |
| YPL024W                                          | RMI1          | YGL151W                 | NUT1          |
| YOR337W                                          | TEA1          | YPL137C                 | GIP3          |
| YLR093C                                          | NYV1          | YFL048C                 | EMP47         |
| YMR026C                                          | PEX12         | YER122C                 | GLO3          |
| YBR200W                                          | BEM1          | YDR310C                 | SUM1          |
| YHR134W                                          | WSS1          | YGL175C                 | SAE2          |
| YMR054W                                          | STV1          | YDR153C                 | ENT5          |
| YPL234C                                          | TFP3          | YJL183W                 | MNN11         |
| YNL215W                                          | IES2          | YCL037C                 | SRO9          |
| YDR174W                                          | HMO1          | YNL116W                 | DMA2          |
| YFL023W                                          | BUD27         | YKL048C                 | ELM1          |
| YIL159W                                          | BNR1          | YBL051C                 | PIN4          |
| YHL020C                                          | OPI1          | YDL077C                 | VAM6          |
| YLR288C                                          | MEC3          | YJL138C                 | TIF2          |
| YLR254C                                          | NDL1          | YGL252C                 | RTG2          |
| YLR360W                                          | VPS38         | YOR109W                 | INP53         |
| YOL145C                                          | CTR9          | YGL025C                 | PGD1          |
| YJR063W                                          | RPA12         | YER068W                 | MOT2          |
| YDR156W                                          | RPA14         | YOR032C                 | HMS1          |
| YIL034C                                          | CAP2          | YGL212W                 | VAM7          |
| YGL135W                                          | RPL1B         | YBR042C                 | CST26         |
| YJL210W                                          | PEX2          | YAL055W                 | PEX22         |
| YJL136C                                          | RPS21B        | YDL047W                 | SIT4          |

| Predictions at threshold level 0.75 continued... |               |                         |               |
|--------------------------------------------------|---------------|-------------------------|---------------|
| Gene1 of predicted pair                          |               | Gene2 of predicted pair |               |
| Systematic Name                                  | Standard Name | Systematic Name         | Standard Name |
| YNL248C                                          | RPA49         | YKL048C                 | ELM1          |
| YBR260C                                          | RGD1          | YLR425W                 | TUS1          |
| YLR192C                                          | HCR1          | YDL184C                 | RPL41A        |
| YDR477W                                          | SNF1          | YBR260C                 | RGD1          |
| YGL147C                                          | RPL9A         | YIL159W                 | BNR1          |
| YDR484W                                          | VPS52         | YKR035W-A               | DID2          |
| YKR072C                                          | SIS2          | YOR368W                 | RAD17         |
| YDR080W                                          | VPS41         | YPL057C                 | SUR1          |
| YDR443C                                          | SSN2          | YGL124C                 | MON1          |
| YDR227W                                          | SIR4          | YHR061C                 | GIC1          |
| YFR010W                                          | UBP6          | YBR194W                 | SOY1          |
| YCL037C                                          | SRO9          | YOR308C                 | SNU66         |
| YDR293C                                          | SSD1          | YJL004C                 | SYS1          |
| YPL246C                                          | RBD2          | YKR030W                 | GMH1          |
| YPL049C                                          | DIG1          | YBR083W                 | TEC1          |
| YCR024C-A                                        | PMP1          | YMR125W                 | STO1          |
| YMR095C                                          | SNO1          | YDR358W                 | GGA1          |
| YBR107C                                          | IML3          | YIR005W                 | IST3          |
| YJR056C                                          | YJR056C       | YNL041C                 | COG6          |
| YOR270C                                          | VPH1          | YOR035C                 | SHE4          |
| YBR173C                                          | UMP1          | YOL111C                 | MDY2          |
| YDR202C                                          | RAV2          | YDR137W                 | RGP1          |
| YIL002C                                          | INP51         | YDL161W                 | ENT1          |
| YPL246C                                          | RBD2          | YOR284W                 | HUA2          |
| YPR119W                                          | CLB2          | YLR032W                 | RAD5          |
| YGL200C                                          | EMP24         | YLR131C                 | ACE2          |
| YGR188C                                          | BUB1          | YNL225C                 | CNM67         |
| YGL016W                                          | KAP122        | YKL068W                 | NUP100        |
| YER162C                                          | RAD4          | YDR358W                 | GGA1          |

| Predictions at threshold level 0.75 continued... |               |                         |               |
|--------------------------------------------------|---------------|-------------------------|---------------|
| Gene1 of predicted pair                          |               | Gene2 of predicted pair |               |
| Systematic Name                                  | Standard Name | Systematic Name         | Standard Name |
| YDL223C                                          | HBT1          | YJL095W                 | BCK1          |
| YDR137W                                          | RGP1          | YDL077C                 | VAM6          |
| YML109W                                          | ZDS2          | YNL030W                 | HHF2          |
| YML001W                                          | YPT7          | YBR280C                 | SAF1          |
| YDL002C                                          | NHP10         | YHR167W                 | THP2          |
| YBR194W                                          | SOY1          | YBR200W                 | BEM1          |
| YBR173C                                          | UMP1          | YOR035C                 | SHE4          |
| YPL161C                                          | BEM4          | YFL033C                 | RIM15         |
| YDR477W                                          | SNF1          | YPR036W                 | VMA13         |
| YLR360W                                          | VPS38         | YDR207C                 | UME6          |
| YOR332W                                          | VMA4          | YKL119C                 | VPH2          |
| YMR224C                                          | MRE11         | YDL155W                 | CLB3          |
| YNL288W                                          | CAF40         | YEL053C                 | MAK10         |
| YCR020C-A                                        | MAK31         | YOR132W                 | VPS17         |
| YPL022W                                          | RAD1          | YGL094C                 | PAN2          |
| YLR292C                                          | SEC72         | YAL002W                 | VPS8          |
| YPL152W                                          | RRD2          | YPR119W                 | CLB2          |
| YER139C                                          | YER139C       | YLR180W                 | SAM1          |
| YLR292C                                          | SEC72         | YJL095W                 | BCK1          |
| YBL102W                                          | SFT2          | YDR108W                 | GSG1          |
| YBR171W                                          | SEC66         | YPL037C                 | EGD1          |
| YJR056C                                          | YJR056C       | YHR039C-A               | VMA10         |
| YGR054W                                          | YGR054W       | YJR135C                 | MCM22         |
| YGL237C                                          | HAP2          | YMR055C                 | BUB2          |
| YMR311C                                          | GLC8          | YLR370C                 | ARC18         |
| YHR111W                                          | UBA4          | YJR032W                 | CPR7          |
| YPR018W                                          | RLF2          | YOL110W                 | SHR5          |
| YGL250W                                          | RMR1          | YPR046W                 | MCM16         |
| YJL176C                                          | SWI3          | YCR077C                 | PAT1          |

| Predictions at threshold level 0.75 continued... |               |                         |               |
|--------------------------------------------------|---------------|-------------------------|---------------|
| Gene1 of predicted pair                          |               | Gene2 of predicted pair |               |
| Systematic Name                                  | Standard Name | Systematic Name         | Standard Name |
| YGL115W                                          | SNF4          | YDL047W                 | SIT4          |
| YNL215W                                          | IES2          | YHL031C                 | GOS1          |
| YER139C                                          | YER139C       | YDL192W                 | ARF1          |
| YIL036W                                          | CST6          | YLR254C                 | NDL1          |
| YOR033C                                          | EXO1          | YJL124C                 | LSM1          |
| YML001W                                          | YPT7          | YMR230W                 | RPS10B        |
| YDR477W                                          | SNF1          | YDL077C                 | VAM6          |
| YDR383C                                          | NKP1          | YJR063W                 | RPA12         |
| YKL006W                                          | RPL14A        | YBL072C                 | RPS8A         |
| YFR031C-A                                        | RPL2A         | YER120W                 | SCS2          |
| YLR410W                                          | VIP1          | YNL107W                 | YAF9          |
| YER044C                                          | ERG28         | YEL053C                 | MAK10         |
| YCR088W                                          | ABP1          | YOR284W                 | HUA2          |
| YNL135C                                          | FPR1          | YDR155C                 | CPR1          |
| YPL001W                                          | HAT1          | YDL002C                 | NHP10         |
| YGL019W                                          | CKB1          | YPR119W                 | CLB2          |
| YLL039C                                          | UBI4          | YDR440W                 | DOT1          |
| YHL031C                                          | GOS1          | YBR215W                 | HPC2          |
| YFR031C-A                                        | RPL2A         | YPR032W                 | SRO7          |
| YFR010W                                          | UBP6          | YER161C                 | SPT2          |
| YGR135W                                          | PRE9          | YOR035C                 | SHE4          |
| YOR080W                                          | DIA2          | YGR105W                 | VMA21         |
| YHR039C-A                                        | VMA10         | YKL080W                 | VMA5          |
| YMR016C                                          | SOK2          | YOL081W                 | IRA2          |
| YOR038C                                          | HIR2          | YLR350W                 | ORM2          |
| YML103C                                          | NUP188        | YDR378C                 | LSM6          |
| YGL212W                                          | VAM7          | YBL047C                 | EDE1          |
| YIL033C                                          | BCY1          | YLR206W                 | ENT2          |
| YOR001W                                          | RRP6          | YDR440W                 | DOT1          |

| Predictions at threshold level 0.75 continued... |               |                         |               |
|--------------------------------------------------|---------------|-------------------------|---------------|
| Gene1 of predicted pair                          |               | Gene2 of predicted pair |               |
| Systematic Name                                  | Standard Name | Systematic Name         | Standard Name |
| YPR084W                                          | YPR084W       | YOR080W                 | DIA2          |
| YPL161C                                          | BEM4          | YJR032W                 | CPR7          |
| YMR179W                                          | SPT21         | YGL003C                 | CDH1          |
| YOR076C                                          | SKI7          | YPL024W                 | RMI1          |
| YCR020C-A                                        | MAK31         | YOR109W                 | INP53         |
| YDR156W                                          | RPA14         | YML117W                 | NAB6          |
| YPL253C                                          | VIK1          | YOR014W                 | RTS1          |
| YDL077C                                          | VAM6          | YKL119C                 | VPH2          |
| YIR005W                                          | IST3          | YJR135C                 | MCM22         |
| YNL041C                                          | COG6          | YLR309C                 | IMH1          |
| YOR270C                                          | VPH1          | YER139C                 | YER139C       |
| YLL039C                                          | UBI4          | YDR477W                 | SNF1          |
| YMR172W                                          | HOT1          | YLR234W                 | TOP3          |
| YHR134W                                          | WSS1          | YER110C                 | KAP123        |
| YGL060W                                          | YBP2          | YJL058C                 | BIT61         |
| YGL066W                                          | SGF73         | YBR107C                 | IML3          |
| YEL065W                                          | SIT1          | YBR171W                 | SEC66         |
| YCL037C                                          | SRO9          | YML071C                 | COG8          |
| YLR094C                                          | GIS3          | YPR046W                 | MCM16         |
| YDR443C                                          | SSN2          | YBR171W                 | SEC66         |
| YML041C                                          | VPS71         | YGL094C                 | PAN2          |
| YDR225W                                          | HTA1          | YLR399C                 | BDF1          |
| YGR261C                                          | APL6          | YCL001W                 | RER1          |
| YMR224C                                          | MRE11         | YOL090W                 | MSH2          |
| YPR171W                                          | BSP1          | YHR016C                 | YSC84         |
| YNL307C                                          | MCK1          | YKR035W-A               | DID2          |
| YJR040W                                          | GEF1          | YDL006W                 | PTC1          |
| YPR131C                                          | NAT3          | YML095C                 | RAD10         |
| YLR119W                                          | SRN2          | YNL087W                 | TCB2          |

| Predictions at threshold level 0.75 continued... |               |                         |               |
|--------------------------------------------------|---------------|-------------------------|---------------|
| Gene1 of predicted pair                          |               | Gene2 of predicted pair |               |
| Systematic Name                                  | Standard Name | Systematic Name         | Standard Name |
| YPL120W                                          | VPS30         | YNL107W                 | YAF9          |
| YFR031C-A                                        | RPL2A         | YOR112W                 | CEX1          |
| YML038C                                          | YMD8          | YEL051W                 | VMA8          |
| YGL115W                                          | SNF4          | YJR135C                 | MCM22         |
| YMR167W                                          | MLH1          | YNL082W                 | PMS1          |
| YGR268C                                          | HUA1          | YKR030W                 | GMH1          |
| YDR080W                                          | VPS41         | YEL053C                 | MAK10         |
| YOR327C                                          | SNC2          | YDR310C                 | SUM1          |
| YEL009C                                          | GCN4          | YNL025C                 | SSN8          |
| YDR443C                                          | SSN2          | YMR016C                 | SOK2          |
| YNL025C                                          | SSN8          | YNL199C                 | GCR2          |
| YLR234W                                          | TOP3          | YDR155C                 | CPR1          |
| YGL178W                                          | MPT5          | YER016W                 | BIM1          |
| YLR079W                                          | SIC1          | YDR335W                 | MSN5          |
| YGL208W                                          | SIP2          | YGL115W                 | SNF4          |
| YDL192W                                          | ARF1          | YER040W                 | GLN3          |
| YLR150W                                          | STM1          | YFR036W                 | CDC26         |
| YPR131C                                          | NAT3          | YLR381W                 | CTF3          |
| YML058W                                          | SML1          | YDR071C                 | PAA1          |
| YMR139W                                          | RIM11         | YJR094C                 | IME1          |
| YGR261C                                          | APL6          | YGL212W                 | VAM7          |
| YNL058C                                          | YNL058C       | YOL081W                 | IRA2          |
| YHR200W                                          | RPN10         | YLR093C                 | NYV1          |
| YGR081C                                          | SLX9          | YJR090C                 | GRR1          |
| YBL051C                                          | PIN4          | YDL155W                 | CLB3          |
| YGL087C                                          | MMS2          | YFR010W                 | UBP6          |
| YHR103W                                          | SBE22         | YFR021W                 | ATG18         |
| YGL135W                                          | RPL1B         | YLR061W                 | RPL22A        |
| YDR392W                                          | SPT3          | YER107C                 | GLE2          |

| Predictions at threshold level 0.75 continued... |               |                         |               |
|--------------------------------------------------|---------------|-------------------------|---------------|
| Gene1 of predicted pair                          |               | Gene2 of predicted pair |               |
| Systematic Name                                  | Standard Name | Systematic Name         | Standard Name |
| YJL036W                                          | SNX4          | YNL297C                 | MON2          |
| YGL208W                                          | SIP2          | YDR028C                 | REG1          |
| YLR337C                                          | VRP1          | YMR055C                 | BUB2          |
| YOR080W                                          | DIA2          | YPL057C                 | SUR1          |
| YJL176C                                          | SWI3          | YCL037C                 | SRO9          |
| YOR043W                                          | WHI2          | YPL256C                 | CLN2          |
| YLR119W                                          | SRN2          | YBR036C                 | CSG2          |
| YER161C                                          | SPT2          | YGL148W                 | ARO2          |
| YDR443C                                          | SSN2          | YKR035W-A               | DID2          |
| YBR274W                                          | CHK1          | YOL081W                 | IRA2          |
| YNL166C                                          | BNI5          | YDR318W                 | MCM21         |
| YDR295C                                          | HDA2          | YEL043W                 | YEL043W       |
| YFR010W                                          | UBP6          | YLR180W                 | SAM1          |
| YKL139W                                          | CTK1          | YLR399C                 | BDF1          |
| YLR192C                                          | HCR1          | YIL076W                 | SEC28         |
| YBR107C                                          | IML3          | YKL048C                 | ELM1          |
| YER144C                                          | UBP5          | YHR200W                 | RPN10         |
| YOR337W                                          | TEA1          | YLR441C                 | RPS1A         |
| YPL057C                                          | SUR1          | YCR077C                 | PAT1          |
| YLR234W                                          | TOP3          | YHR178W                 | STB5          |
| YDL155W                                          | CLB3          | YPR046W                 | MCM16         |
| YHR013C                                          | ARD1          | YKL041W                 | VPS24         |
| YLR386W                                          | VAC14         | YKL101W                 | HSL1          |
| YBR260C                                          | RGD1          | YNL079C                 | TPM1          |
| YPR018W                                          | RLF2          | YML102W                 | CAC2          |
| YIL036W                                          | CST6          | YPL253C                 | VIK1          |
| YGL115W                                          | SNF4          | YFR036W                 | CDC26         |
| YDR254W                                          | CHL4          | YLR370C                 | ARC18         |
| YLR018C                                          | POM34         | YER110C                 | KAP123        |



| Predictions at threshold level 0.75 continued... |               |                         |               |
|--------------------------------------------------|---------------|-------------------------|---------------|
| Gene1 of predicted pair                          |               | Gene2 of predicted pair |               |
| Systematic Name                                  | Standard Name | Systematic Name         | Standard Name |
| YGL124C                                          | MON1          | YHR115C                 | DMA1          |
| YCR065W                                          | HCM1          | YGL124C                 | MON1          |
| YLR337C                                          | VRP1          | YLR370C                 | ARC18         |
| YKL048C                                          | ELM1          | YOR275C                 | RIM20         |
| YKL116C                                          | PRR1          | YMR142C                 | RPL13B        |
| YEL053C                                          | MAK10         | YHL020C                 | OPI1          |
| YGL178W                                          | MPT5          | YLR182W                 | SWI6          |
| YDR289C                                          | RTT103        | YJL190C                 | RPS22A        |
| YOR290C                                          | SNF2          | YEL060C                 | PRB1          |
| YMR224C                                          | MRE11         | YGL078C                 | DBP3          |
| YPR051W                                          | MAK3          | YBR171W                 | SEC66         |
| YPR018W                                          | RLF2          | YPL018W                 | CTF19         |
| YHR111W                                          | UBA4          | YNL289W                 | PCL1          |
| YIL159W                                          | BNR1          | YMR224C                 | MRE11         |
| YER114C                                          | BOI2          | YER118C                 | SHO1          |
| YOR195W                                          | SLK19         | YML016C                 | PPZ1          |
| YJR135C                                          | MCM22         | YGL151W                 | NUT1          |
| YMR199W                                          | CLN1          | YGL175C                 | SAE2          |
| YDR225W                                          | HTA1          | YBL002W                 | HTB2          |
| YPL037C                                          | EGD1          | YBR019C                 | GAL10         |
| YLR083C                                          | EMP70         | YGR020C                 | VMA7          |
| YBR131W                                          | CCZ1          | YOL018C                 | TLG2          |
| YGL078C                                          | DBP3          | YKL048C                 | ELM1          |
| YBR194W                                          | SOY1          | YIL036W                 | CST6          |
| YHR200W                                          | RPN10         | YGR135W                 | PRE9          |
| YBR194W                                          | SOY1          | YLR350W                 | ORM2          |
| YJL036W                                          | SNX4          | YOR106W                 | VAM3          |
| YBR030W                                          | YBR030W       | YNL307C                 | MCK1          |
| YOR109W                                          | INP53         | YNL127W                 | FAR11         |

| Predictions at threshold level 0.75 continued... |               |                         |               |
|--------------------------------------------------|---------------|-------------------------|---------------|
| Gene1 of predicted pair                          |               | Gene2 of predicted pair |               |
| Systematic Name                                  | Standard Name | Systematic Name         | Standard Name |
| YIL159W                                          | BNR1          | YJL095W                 | BCK1          |
| YPL234C                                          | TFP3          | YLR309C                 | IMH1          |
| YHR052W                                          | CIC1          | YCR086W                 | CSM1          |
| YDR443C                                          | SSN2          | YER096W                 | SHC1          |
| YKR035W-A                                        | DID2          | YHR081W                 | LRP1          |
| YLR360W                                          | VPS38         | YDR245W                 | MNN10         |
| YNL166C                                          | BNI5          | YGL253W                 | HXK2          |
| YDR379W                                          | RGA2          | YGR152C                 | RSR1          |
| YKL048C                                          | ELM1          | YDL083C                 | RPS16B        |
| YPL001W                                          | HAT1          | YCR086W                 | CSM1          |
| YER087C-B                                        | SBH1          | YOR085W                 | OST3          |
| YNL201C                                          | PSY2          | YGR270W                 | YTA7          |
| YDR004W                                          | RAD57         | YDR254W                 | CHL4          |
| YGL066W                                          | SGF73         | YPR036W                 | VMA13         |
| YDR264C                                          | AKR1          | YNL116W                 | DMA2          |
| YDL020C                                          | RPN4          | YBL051C                 | PIN4          |
| YJL154C                                          | VPS35         | YLR396C                 | VPS33         |
| YKL110C                                          | KTI12         | YOL054W                 | PSH1          |
| YPL049C                                          | DIG1          | YHR084W                 | STE12         |
| YLR079W                                          | SIC1          | YHR111W                 | UBA4          |
| YJL177W                                          | RPL17B        | YPL240C                 | HSP82         |
| YNL253W                                          | TEX1          | YCL011C                 | GBP2          |
| YBR173C                                          | UMP1          | YHR156C                 | LIN1          |
| YJL154C                                          | VPS35         | YNL238W                 | KEX2          |
| YLL007C                                          | YLL007C       | YJR032W                 | CPR7          |
| YGL054C                                          | ERV14         | YAL002W                 | VPS8          |
| YDR335W                                          | MSN5          | YER161C                 | SPT2          |
| YJL157C                                          | FAR1          | YGL003C                 | CDH1          |
| YBR019C                                          | GAL10         | YMR311C                 | GLC8          |

| Predictions at threshold level 0.75 continued... |               |                         |               |
|--------------------------------------------------|---------------|-------------------------|---------------|
| Gene1 of predicted pair                          |               | Gene2 of predicted pair |               |
| Systematic Name                                  | Standard Name | Systematic Name         | Standard Name |
| YOR066W                                          | MSA1          | YDR358W                 | GGA1          |
| YOR066W                                          | MSA1          | YFR036W                 | CDC26         |
| YKR001C                                          | VPS1          | YPL112C                 | PEX25         |
| YDL155W                                          | CLB3          | YCR077C                 | PAT1          |
| YKR020W                                          | VPS51         | YDR309C                 | GIC2          |
| YKR001C                                          | VPS1          | YPR032W                 | SRO7          |
| YOR195W                                          | SLK19         | YNL054W                 | VAC7          |
| YGL223C                                          | COG1          | YPL120W                 | VPS30         |
| YDR245W                                          | MNN10         | YHR167W                 | THP2          |
| YMR026C                                          | PEX12         | YKR099W                 | BAS1          |
| YLR337C                                          | VRP1          | YBR082C                 | UBC4          |
| YDR137W                                          | RGP1          | YER139C                 | YER139C       |
| YBR057C                                          | MUM2          | YFR036W                 | CDC26         |
| YNL325C                                          | FIG4          | YOL081W                 | IRA2          |
| YBL047C                                          | EDE1          | YAL002W                 | VPS8          |
| YLR102C                                          | APC9          | YJL095W                 | BCK1          |
| YOR039W                                          | CKB2          | YJL138C                 | TIF2          |
| YNL291C                                          | MID1          | YNL307C                 | MCK1          |
| YNL307C                                          | MCK1          | YFR036W                 | CDC26         |
| YPL253C                                          | VIK1          | YAL002W                 | VPS8          |
| YPL253C                                          | VIK1          | YGR054W                 | YGR054W       |
| YER096W                                          | SHC1          | YPL161C                 | BEM4          |
| YBR030W                                          | YBR030W       | YML071C                 | COG8          |
| YCR024C-A                                        | PMP1          | YBL079W                 | NUP170        |
| YPL037C                                          | EGD1          | YJL095W                 | BCK1          |
| YAL024C                                          | LTE1          | YMR055C                 | BUB2          |
| YMR179W                                          | SPT21         | YML016C                 | PPZ1          |
| YMR224C                                          | MRE11         | YBL103C                 | RTG3          |
| YHR156C                                          | LIN1          | YBR108W                 | YBR108W       |

| Predictions at threshold level 0.75 continued... |               |                         |               |
|--------------------------------------------------|---------------|-------------------------|---------------|
| Gene1 of predicted pair                          |               | Gene2 of predicted pair |               |
| Systematic Name                                  | Standard Name | Systematic Name         | Standard Name |
| YKL139W                                          | CTK1          | YPL152W                 | RRD2          |
| YFR032C-A                                        | RPL29         | YBR131W                 | CCZ1          |
| YBR173C                                          | UMP1          | YLR032W                 | RAD5          |
| YDR443C                                          | SSN2          | YPL253C                 | VIK1          |
| YDR245W                                          | MNN10         | YOR141C                 | ARP8          |
| YDR439W                                          | LRS4          | YPL018W                 | CTF19         |
| YHL027W                                          | RIM101        | YLR370C                 | ARC18         |
| YPL057C                                          | SUR1          | YGL124C                 | MON1          |
| YLR079W                                          | SIC1          | YHR115C                 | DMA1          |
| YFR036W                                          | CDC26         | YLR370C                 | ARC18         |
| YML001W                                          | YPT7          | YEL060C                 | PRB1          |
| YHR060W                                          | VMA22         | YOL121C                 | RPS19A        |
| YKR001C                                          | VPS1          | YDR310C                 | SUM1          |
| YPR120C                                          | CLB5          | YBR036C                 | CSG2          |
| YLR234W                                          | TOP3          | YJR090C                 | GRR1          |
| YDR484W                                          | VPS52         | YLR398C                 | SKI2          |
| YNL032W                                          | SIW14         | YHL011C                 | PRS3          |
| YLR381W                                          | CTF3          | YNL147W                 | LSM7          |
| YPL024W                                          | RMI1          | YOL121C                 | RPS19A        |
| YMR205C                                          | PFK2          | YLR371W                 | ROM2          |
| YMR133W                                          | REC114        | YGL003C                 | CDH1          |
| YNR052C                                          | POP2          | YJL124C                 | LSM1          |
| YJL176C                                          | SWI3          | YDR137W                 | RGP1          |
| YJL183W                                          | MNN11         | YGL253W                 | HXK2          |
| YLR093C                                          | NYV1          | YNR007C                 | ATG3          |
| YGL223C                                          | COG1          | YAR014C                 | BUD14         |
| YDR289C                                          | RTT103        | YEL056W                 | HAT2          |
| YDL116W                                          | NUP84         | YOR195W                 | SLK19         |
| YGL147C                                          | RPL9A         | YBR108W                 | YBR108W       |

| Predictions at threshold level 0.75 continued... |               |                         |               |
|--------------------------------------------------|---------------|-------------------------|---------------|
| Gene1 of predicted pair                          |               | Gene2 of predicted pair |               |
| Systematic Name                                  | Standard Name | Systematic Name         | Standard Name |
| YBR200W                                          | BEM1          | YDR183W                 | PLP1          |
| YBR107C                                          | IML3          | YBR114W                 | RAD16         |
| YLL007C                                          | YLL007C       | YDR289C                 | RTT103        |
| YNL238W                                          | KEX2          | YLR306W                 | UBC12         |
| YDR245W                                          | MNN10         | YDR310C                 | SUM1          |
| YGR270W                                          | YTA7          | YJL006C                 | CTK2          |
| YPR171W                                          | BSP1          | YKL204W                 | EAP1          |
| YJL157C                                          | FAR1          | YDL047W                 | SIT4          |
| YDR254W                                          | CHL4          | YJL183W                 | MNN11         |
| YGL223C                                          | COG1          | YDL192W                 | ARF1          |
| YPL037C                                          | EGD1          | YPR046W                 | MCM16         |
| YDL006W                                          | PTC1          | YOL108C                 | INO4          |
| YOR109W                                          | INP53         | YHR039C-A               | VMA10         |
| YER044C                                          | ERG28         | YJL183W                 | MNN11         |
| YJR040W                                          | GEF1          | YHR060W                 | VMA22         |
| YHR013C                                          | ARD1          | YGL163C                 | RAD54         |
| YKR072C                                          | SIS2          | YDR146C                 | SWI5          |
| YMR172W                                          | HOT1          | YJR135C                 | MCM22         |
| YDR261C                                          | EXG2          | YLR370C                 | ARC18         |
| YPL256C                                          | CLN2          | YBL087C                 | RPL23A        |
| YGR072W                                          | UPF3          | YGR071C                 | YGR071C       |
| YMR224C                                          | MRE11         | YIR002C                 | MPH1          |
| YDL116W                                          | NUP84         | YAL024C                 | LTE1          |
| YDR265W                                          | PEX10         | YNL214W                 | PEX17         |
| YHR060W                                          | VMA22         | YPL120W                 | VPS30         |
| YIL159W                                          | BNR1          | YEL060C                 | PRB1          |
| YPR046W                                          | MCM16         | YAL002W                 | VPS8          |
| YGL033W                                          | HOP2          | YBL103C                 | RTG3          |
| YJR056C                                          | YJR056C       | YDR358W                 | GGA1          |

| Predictions at threshold level 0.75 continued... |               |                         |               |
|--------------------------------------------------|---------------|-------------------------|---------------|
| Gene1 of predicted pair                          |               | Gene2 of predicted pair |               |
| Systematic Name                                  | Standard Name | Systematic Name         | Standard Name |
| YBL008W                                          | HIR1          | YDR318W                 | MCM21         |
| YBL102W                                          | SFT2          | YCL037C                 | SRO9          |
| YML007W                                          | YAP1          | YGL208W                 | SIP2          |
| YNL117W                                          | MLS1          | YCR086W                 | CSM1          |
| YLR360W                                          | VPS38         | YPR051W                 | MAK3          |
| YBR171W                                          | SEC66         | YOR066W                 | MSA1          |
| YJR060W                                          | CBF1          | YDR318W                 | MCM21         |
| YDR137W                                          | RGP1          | YEL042W                 | GDA1          |
| YLR337C                                          | VRP1          | YKR014C                 | YPT52         |
| YDR129C                                          | SAC6          | YBL101C                 | ECM21         |
| YOR197W                                          | MCA1          | YPL112C                 | PEX25         |
| YBR108W                                          | YBR108W       | YLR381W                 | CTF3          |
| YPL096C-A                                        | ERI1          | YLR370C                 | ARC18         |
| YDL116W                                          | NUP84         | YNR052C                 | POP2          |
| YLR447C                                          | VMA6          | YGR054W                 | YGR054W       |
| YGL161C                                          | YIP5          | YOR213C                 | SAS5          |
| YLR018C                                          | POM34         | YMR153W                 | NUP53         |
| YFR031C-A                                        | RPL2A         | YLR094C                 | GIS3          |
| YLR006C                                          | SSK1          | YDR379W                 | RGA2          |
| YCR088W                                          | ABP1          | YKR001C                 | VPS1          |
| YBR173C                                          | UMP1          | YOR043W                 | WHI2          |
| YGR249W                                          | MGA1          | YDR137W                 | RGP1          |
| YFR010W                                          | UBP6          | YBR228W                 | SLX1          |
| YDL127W                                          | PCL2          | YFR034C                 | PHO4          |
| YKL139W                                          | CTK1          | YDR363W-A               | SEM1          |
| YGL198W                                          | YIP4          | YNR049C                 | MSO1          |
| YML071C                                          | COG8          | YJL095W                 | BCK1          |
| YJR035W                                          | RAD26         | YDR207C                 | UME6          |
| YOR043W                                          | WHI2          | YNL079C                 | TPM1          |

| Predictions at threshold level 0.75 continued... |               |                         |               |
|--------------------------------------------------|---------------|-------------------------|---------------|
| Gene1 of predicted pair                          |               | Gene2 of predicted pair |               |
| Systematic Name                                  | Standard Name | Systematic Name         | Standard Name |
| YKL048C                                          | ELM1          | YGL019W                 | CKB1          |
| YPL137C                                          | GIP3          | YPR030W                 | CSR2          |
| YBL103C                                          | RTG3          | YOL121C                 | RPS19A        |
| YGR268C                                          | HUA1          | YHR016C                 | YSC84         |
| YBR171W                                          | SEC66         | YNL107W                 | YAF9          |
| YGR020C                                          | VMA7          | YPL120W                 | VPS30         |
| YLR370C                                          | ARC18         | YDR310C                 | SUM1          |
| YML016C                                          | PPZ1          | YMR109W                 | MYO5          |
| YDR080W                                          | VPS41         | YJR040W                 | GEF1          |
| YIL076W                                          | SEC28         | YLR094C                 | GIS3          |
| YJL029C                                          | VPS53         | YGL198W                 | YIP4          |
| YJL124C                                          | LSM1          | YEL056W                 | HAT2          |
| YMR224C                                          | MRE11         | YIL036W                 | CST6          |
| YFR010W                                          | UBP6          | YEL053C                 | MAK10         |
| YPR051W                                          | MAK3          | YJL190C                 | RPS22A        |
| YNL139C                                          | RLR1          | YBR111W-A               | SUS1          |
| YLR381W                                          | CTF3          | YNL248C                 | RPA49         |
| YMR004W                                          | MVP1          | YJR060W                 | CBF1          |
| YPL253C                                          | VIK1          | YDR363W-A               | SEM1          |
| YGL212W                                          | VAM7          | YDR261C                 | EXG2          |
| YML115C                                          | VAN1          | YNL238W                 | KEX2          |
| YPR131C                                          | NAT3          | YMR199W                 | CLN1          |
| YGR108W                                          | CLB1          | YDR254W                 | CHL4          |
| YPR018W                                          | RLF2          | YDL155W                 | CLB3          |
| YML001W                                          | YPT7          | YNL051W                 | COG5          |
| YLR337C                                          | VRP1          | YGL153W                 | PEX14         |
| YIL007C                                          | NAS2          | YDL240W                 | LRG1          |
| YNL297C                                          | MON2          | YML038C                 | YMD8          |
| YKL116C                                          | PRR1          | YLR398C                 | SKI2          |

| Predictions at threshold level 0.75 continued... |               |                         |               |
|--------------------------------------------------|---------------|-------------------------|---------------|
| Gene1 of predicted pair                          |               | Gene2 of predicted pair |               |
| Systematic Name                                  | Standard Name | Systematic Name         | Standard Name |
| YHR060W                                          | VMA22         | YCL001W                 | RER1          |
| YOR033C                                          | EXO1          | YDR207C                 | UME6          |
| YOL126C                                          | MDH2          | YER115C                 | SPR6          |
| YPL057C                                          | SUR1          | YGL163C                 | RAD54         |
| YKL025C                                          | PAN3          | YPL115C                 | BEM3          |
| YLR292C                                          | SEC72         | YDR318W                 | MCM21         |
| YPR089W                                          | YPR089W       | YMR022W                 | UBC7          |
| YNR072W                                          | HXT17         | YDR261C                 | EXG2          |
| YHR134W                                          | WSS1          | YLR233C                 | EST1          |
| YCL037C                                          | SRO9          | YIR005W                 | IST3          |
| YOR312C                                          | RPL20B        | YEL036C                 | ANP1          |
| YBR200W                                          | BEM1          | YDR261C                 | EXG2          |
| YMR224C                                          | MRE11         | YGL153W                 | PEX14         |
| YDL101C                                          | DUN1          | YML028W                 | TSA1          |
| YDR146C                                          | SWI5          | YHR108W                 | GGA2          |
| YPL024W                                          | RMI1          | YER144C                 | UBP5          |
| YLR095C                                          | IOC2          | YGR249W                 | MGA1          |
| YCR066W                                          | RAD18         | YER162C                 | RAD4          |
| YDL020C                                          | RPN4          | YJR135C                 | MCM22         |
| YDR320C                                          | SWA2          | YHR039C-A               | VMA10         |
| YKR001C                                          | VPS1          | YGL115W                 | SNF4          |
| YNL032W                                          | SIW14         | YMR133W                 | REC114        |
| YLR083C                                          | EMP70         | YOR127W                 | RGA1          |
| YJR059W                                          | PTK2          | YMR125W                 | STO1          |
| YCL073C                                          | YCL073C       | YER098W                 | UBP9          |
| YLR093C                                          | NYV1          | YAL030W                 | SNC1          |
| YNL044W                                          | YIP3          | YNL293W                 | MSB3          |
| YDR293C                                          | SSD1          | YIL008W                 | URM1          |
| YLR094C                                          | GIS3          | YMR152W                 | YIM1          |



| Predictions at threshold level 0.75 continued... |               |                         |               |
|--------------------------------------------------|---------------|-------------------------|---------------|
| Gene1 of predicted pair                          |               | Gene2 of predicted pair |               |
| Systematic Name                                  | Standard Name | Systematic Name         | Standard Name |
| YER114C                                          | BOI2          | YHR012W                 | VPS29         |
| YDR200C                                          | VPS64         | YDL047W                 | SIT4          |
| YBL103C                                          | RTG3          | YGL252C                 | RTG2          |
| YLR192C                                          | HCR1          | YMR311C                 | GLC8          |
| YKL025C                                          | PAN3          | YPL022W                 | RAD1          |
| YPR051W                                          | MAK3          | YCR086W                 | CSM1          |
| YJR032W                                          | CPR7          | YPR119W                 | CLB2          |
| YMR214W                                          | SCJ1          | YDR207C                 | UME6          |
| YBR173C                                          | UMP1          | YER139C                 | YER139C       |
| YFL013C                                          | IES1          | YDR289C                 | RTT103        |
| YGL066W                                          | SGF73         | YML095C                 | RAD10         |
| YPL024W                                          | RMI1          | YDL077C                 | VAM6          |
| YEL013W                                          | VAC8          | YHR167W                 | THP2          |
| YLR288C                                          | MEC3          | YNL215W                 | IES2          |
| YDR477W                                          | SNF1          | YNL087W                 | TCB2          |
| YCR066W                                          | RAD18         | YMR055C                 | BUB2          |
| YLR234W                                          | TOP3          | YPL161C                 | BEM4          |
| YDR254W                                          | CHL4          | YHR200W                 | RPN10         |
| YPL042C                                          | SSN3          | YPR072W                 | NOT5          |
| YGR019W                                          | UGA1          | YOR127W                 | RGA1          |
| YFL013C                                          | IES1          | YFR010W                 | UBP6          |
| YCL037C                                          | SRO9          | YAR014C                 | BUD14         |
| YGR270W                                          | YTA7          | YGR188C                 | BUB1          |
| YMR109W                                          | MYO5          | YPR046W                 | MCM16         |
| YGR184C                                          | UBR1          | YGL163C                 | RAD54         |
| YOR197W                                          | MCA1          | YIL033C                 | BCY1          |
| YGL212W                                          | VAM7          | YNR032W                 | PPG1          |
| YGR252W                                          | GCN5          | YLR425W                 | TUS1          |
| YMR198W                                          | CIK1          | YPL234C                 | TFP3          |

| Predictions at threshold level 0.75 continued... |               |                         |               |
|--------------------------------------------------|---------------|-------------------------|---------------|
| Gene1 of predicted pair                          |               | Gene2 of predicted pair |               |
| Systematic Name                                  | Standard Name | Systematic Name         | Standard Name |
| YIL008W                                          | URM1          | YGR135W                 | PRE9          |
| YOR106W                                          | VAM3          | YFL033C                 | RIM15         |
| YOR001W                                          | RRP6          | YCL011C                 | GBP2          |
| YMR224C                                          | MRE11         | YJR021C                 | REC107        |
| YER001W                                          | MNN1          | YHL031C                 | GOS1          |
| YDR335W                                          | MSN5          | YDR363W-A               | SEM1          |
| YPR131C                                          | NAT3          | YLR370C                 | ARC18         |
| YGR105W                                          | VMA21         | YPR032W                 | SRO7          |
| YER144C                                          | UBP5          | YER162C                 | RAD4          |
| YPR131C                                          | NAT3          | YML103C                 | NUP188        |
| YBR111W-A                                        | SUS1          | YDR216W                 | ADR1          |
| YDR004W                                          | RAD57         | YBL079W                 | NUP170        |
| YMR116C                                          | ASC1          | YPL050C                 | MNN9          |
| YFR036W                                          | CDC26         | YMR311C                 | GLC8          |
| YNL201C                                          | PSY2          | YNL106C                 | INP52         |
| YPL129W                                          | TAF14         | YJR060W                 | CBF1          |
| YGR261C                                          | APL6          | YOR327C                 | SNC2          |
| YPR084W                                          | YPR084W       | YJR060W                 | CBF1          |
| YOR001W                                          | RRP6          | YCL037C                 | SRO9          |
| YIL008W                                          | URM1          | YJR032W                 | CPR7          |
| YNL206C                                          | RTT106        | YDR440W                 | DOT1          |
| YJR106W                                          | ECM27         | YPR149W                 | NCE102        |
| YOL031C                                          | SIL1          | YPR119W                 | CLB2          |
| YPR089W                                          | YPR089W       | YDR310C                 | SUM1          |
| YMR311C                                          | GLC8          | YLR425W                 | TUS1          |
| YBL102W                                          | SFT2          | YML071C                 | COG8          |
| YDR456W                                          | NHX1          | YLR371W                 | ROM2          |
| YML115C                                          | VAN1          | YLR447C                 | VMA6          |
| YMR142C                                          | RPL13B        | YPL161C                 | BEM4          |

| Predictions at threshold level 0.75 continued... |               |                         |               |
|--------------------------------------------------|---------------|-------------------------|---------------|
| Gene1 of predicted pair                          |               | Gene2 of predicted pair |               |
| Systematic Name                                  | Standard Name | Systematic Name         | Standard Name |
| YPL001W                                          | HAT1          | YKL032C                 | IXR1          |
| YEL065W                                          | SIT1          | YMR095C                 | SNO1          |
| YAL024C                                          | LTE1          | YML028W                 | TSA1          |
| YDR245W                                          | MNN10         | YLR182W                 | SWI6          |
| YBR200W                                          | BEM1          | YMR179W                 | SPT21         |
| YKL010C                                          | UFD4          | YDR378C                 | LSM6          |
| YLR381W                                          | CTF3          | YOL091W                 | SPO21         |
| YKR001C                                          | VPS1          | YGR105W                 | VMA21         |
| YCR020C-A                                        | MAK31         | YNL051W                 | COG5          |
| YDR320C                                          | SWA2          | YEL051W                 | VMA8          |
| YOR332W                                          | VMA4          | YJR033C                 | RAV1          |
| YPL161C                                          | BEM4          | YBR280C                 | SAF1          |
| YBR107C                                          | IML3          | YJL183W                 | MNN11         |
| YOR195W                                          | SLK19         | YER116C                 | SLX8          |
| YJR090C                                          | GRR1          | YJL190C                 | RPS22A        |
| YER116C                                          | SLX8          | YKL068W                 | NUP100        |
| YKL010C                                          | UFD4          | YOL081W                 | IRA2          |
| YFR036W                                          | CDC26         | YPR119W                 | CLB2          |
| YHR134W                                          | WSS1          | YML028W                 | TSA1          |
| YNL069C                                          | RPL16B        | YPR032W                 | SRO7          |
| YBR200W                                          | BEM1          | YHR200W                 | RPN10         |
| YDR137W                                          | RGP1          | YOR043W                 | WHI2          |
| YOR327C                                          | SNC2          | YBL025W                 | RRN10         |
| YBR030W                                          | YBR030W       | YHR060W                 | VMA22         |
| YNL041C                                          | COG6          | YNL238W                 | KEX2          |
| YHL031C                                          | GOS1          | YPL234C                 | TFP3          |
| YBL008W                                          | HIR1          | YDR254W                 | CHL4          |
| YMR153W                                          | NUP53         | YML071C                 | COG8          |
| YNL248C                                          | RPA49         | YGR188C                 | BUB1          |

| Predictions at threshold level 0.75 continued... |               |                         |               |
|--------------------------------------------------|---------------|-------------------------|---------------|
| Gene1 of predicted pair                          |               | Gene2 of predicted pair |               |
| Systematic Name                                  | Standard Name | Systematic Name         | Standard Name |
| YPL057C                                          | SUR1          | YOR308C                 | SNU66         |
| YHR156C                                          | LIN1          | YNL325C                 | FIG4          |
| YMR153W                                          | NUP53         | YKL048C                 | ELM1          |
| YCR077C                                          | PAT1          | YBL072C                 | RPS8A         |
| YPL045W                                          | VPS16         | YPL195W                 | APL5          |
| YJR060W                                          | CBF1          | YNL107W                 | YAF9          |
| YOR332W                                          | VMA4          | YGR105W                 | VMA21         |
| YJL006C                                          | CTK2          | YCR077C                 | PAT1          |
| YDL116W                                          | NUP84         | YGL031C                 | RPL24A        |
| YLR362W                                          | STE11         | YER124C                 | DSE1          |
| YER144C                                          | UBP5          | YLR371W                 | ROM2          |
| YGR081C                                          | SLX9          | YBL079W                 | NUP170        |
| YLR320W                                          | MMS22         | YDL192W                 | ARF1          |
| YIL036W                                          | CST6          | YLR410W                 | VIP1          |
| YCR065W                                          | HCM1          | YDR108W                 | GSG1          |
| YKL032C                                          | IXR1          | YLR370C                 | ARC18         |
| YOR290C                                          | SNF2          | YHR013C                 | ARD1          |
| YOR290C                                          | SNF2          | YDL192W                 | ARF1          |
| YHL031C                                          | GOS1          | YDL002C                 | NHP10         |
| YFR036W                                          | CDC26         | YDL077C                 | VAM6          |
| YCL032W                                          | STE50         | YDR309C                 | GIC2          |
| YBR194W                                          | SOY1          | YDR245W                 | MNN10         |
| YLR018C                                          | POM34         | YGR081C                 | SLX9          |
| YHR073W                                          | OSH3          | YFL047W                 | RGD2          |
| YDL002C                                          | NHP10         | YNL107W                 | YAF9          |
| YOR023C                                          | AHC1          | YGL151W                 | NUT1          |
| YPL001W                                          | HAT1          | YOR368W                 | RAD17         |
| YHR012W                                          | VPS29         | YER162C                 | RAD4          |
| YKR072C                                          | SIS2          | YJL187C                 | SWE1          |

| Predictions at threshold level 0.75 continued... |               |                         |               |
|--------------------------------------------------|---------------|-------------------------|---------------|
| Gene1 of predicted pair                          |               | Gene2 of predicted pair |               |
| Systematic Name                                  | Standard Name | Systematic Name         | Standard Name |
| YNL307C                                          | MCK1          | YOL090W                 | MSH2          |
| YLR083C                                          | EMP70         | YDR080W                 | VPS41         |
| YNL025C                                          | SSN8          | YLR350W                 | ORM2          |
| YPL137C                                          | GIP3          | YER122C                 | GLO3          |
| YLL007C                                          | YLL007C       | YBR114W                 | RAD16         |
| YPL129W                                          | TAF14         | YMR127C                 | SAS2          |
| YKL048C                                          | ELM1          | YDR289C                 | RTT103        |
| YCL035C                                          | GRX1          | YML007W                 | YAP1          |
| YMR224C                                          | MRE11         | YBL047C                 | EDE1          |
| YDL059C                                          | RAD59         | YNL307C                 | MCK1          |
| YDR080W                                          | VPS41         | YPL195W                 | APL5          |
| YBL103C                                          | RTG3          | YNL238W                 | KEX2          |
| YNL087W                                          | TCB2          | YBR019C                 | GAL10         |
| YDR443C                                          | SSN2          | YPL195W                 | APL5          |
| YGR261C                                          | APL6          | YNL291C                 | MID1          |
| YNL051W                                          | COG5          | YDR207C                 | UME6          |
| YJL190C                                          | RPS22A        | YBR114W                 | RAD16         |
| YLR410W                                          | VIP1          | YDR207C                 | UME6          |
| YCR077C                                          | PAT1          | YEL056W                 | HAT2          |
| YOR043W                                          | WHI2          | YOL121C                 | RPS19A        |
| YEL056W                                          | HAT2          | YBR036C                 | CSG2          |
| YOR106W                                          | VAM3          | YGR209C                 | TRX2          |
| YLR018C                                          | POM34         | YML057W                 | CMP2          |
| YOL126C                                          | MDH2          | YNL199C                 | GCR2          |
| YOL108C                                          | INO4          | YKR030W                 | GMH1          |
| YOR083W                                          | WHI5          | YLR370C                 | ARC18         |
| YGR104C                                          | SRB5          | YFR010W                 | UBP6          |
| YOR212W                                          | STE4          | YDR309C                 | GIC2          |
| YPL001W                                          | HAT1          | YBR009C                 | HHF1          |

| Predictions at threshold level 0.75 continued... |               |                         |               |
|--------------------------------------------------|---------------|-------------------------|---------------|
| Gene1 of predicted pair                          |               | Gene2 of predicted pair |               |
| Systematic Name                                  | Standard Name | Systematic Name         | Standard Name |
| YMR198W                                          | CIK1          | YKL041W                 | VPS24         |
| YJL154C                                          | VPS35         | YDR320C                 | SWA2          |
| YOR014W                                          | RTS1          | YPR119W                 | CLB2          |
| YJR032W                                          | CPR7          | YDR310C                 | SUM1          |
| YNL068C                                          | FKH2          | YNL206C                 | RTT106        |
| YEL053C                                          | MAK10         | YAL002W                 | VPS8          |
| YKL073W                                          | LHS1          | YMR214W                 | SCJ1          |
| YGL054C                                          | ERV14         | YDL077C                 | VAM6          |
| YGL003C                                          | CDH1          | YKL114C                 | APN1          |
| YGL163C                                          | RAD54         | YPL256C                 | CLN2          |
| YLR371W                                          | ROM2          | YMR230W                 | RPS10B        |
| YPL042C                                          | SSN3          | YLR386W                 | VAC14         |
| YLR102C                                          | APC9          | YHR200W                 | RPN10         |
| YJR140C                                          | HIR3          | YML016C                 | PPZ1          |
| YER001W                                          | MNN1          | YJL183W                 | MNN11         |
| YMR127C                                          | SAS2          | YOR023C                 | AHC1          |
| YPR036W                                          | VMA13         | YER044C                 | ERG28         |
| YOR132W                                          | VPS17         | YPL161C                 | BEM4          |
| YAL024C                                          | LTE1          | YJL154C                 | VPS35         |
| YOR023C                                          | AHC1          | YMR055C                 | BUB2          |
| YLR386W                                          | VAC14         | YAL010C                 | MDM10         |
| YDR137W                                          | RGP1          | YER040W                 | GLN3          |
| YDR293C                                          | SSD1          | YGR261C                 | APL6          |
| YMR109W                                          | MYO5          | YHR012W                 | VPS29         |
| YJR040W                                          | GEF1          | YKR020W                 | VPS51         |
| YGL054C                                          | ERV14         | YOR327C                 | SNC2          |
| YKR014C                                          | YPT52         | YNL049C                 | SFB2          |
| YDR443C                                          | SSN2          | YDR456W                 | NHX1          |
| YML115C                                          | VAN1          | YLR425W                 | TUS1          |

| Predictions at threshold level 0.75 continued... |               |                         |               |
|--------------------------------------------------|---------------|-------------------------|---------------|
| Gene1 of predicted pair                          |               | Gene2 of predicted pair |               |
| Systematic Name                                  | Standard Name | Systematic Name         | Standard Name |
| YDL116W                                          | NUP84         | YLR182W                 | SWI6          |
| YLR083C                                          | EMP70         | YOR112W                 | CEX1          |
| YDL161W                                          | ENT1          | YDR323C                 | PEP7          |
| YPR028W                                          | YOP1          | YNR049C                 | MSO1          |
| YLR090W                                          | XDJ1          | YEL053C                 | MAK10         |
| YDR183W                                          | PLP1          | YDR310C                 | SUM1          |
| YER144C                                          | UBP5          | YLR094C                 | GIS3          |
| YFR031C-A                                        | RPL2A         | YOR270C                 | VPH1          |
| YOR106W                                          | VAM3          | YEL053C                 | MAK10         |
| YDR320C                                          | SWA2          | YNL107W                 | YAF9          |
| YOR337W                                          | TEA1          | YNL041C                 | COG6          |
| YHR073W                                          | OSH3          | YKL068W                 | NUP100        |
| YLR240W                                          | VPS34         | YPL120W                 | VPS30         |
| YGL200C                                          | EMP24         | YNL049C                 | SFB2          |
| YML115C                                          | VAN1          | YEL036C                 | ANP1          |
| YBR228W                                          | SLX1          | YGL031C                 | RPL24A        |
| YLR083C                                          | EMP70         | YML001W                 | YPT7          |
| YDL149W                                          | ATG9          | YML059C                 | NTE1          |
| YMR311C                                          | GLC8          | YER040W                 | GLN3          |
| YJL172W                                          | CPS1          | YDR358W                 | GGA1          |
| YOR080W                                          | DIA2          | YOR308C                 | SNU66         |
| YMR319C                                          | FET4          | YOR071C                 | THI71         |
| YPL253C                                          | VIK1          | YJL006C                 | CTK2          |
| YHR134W                                          | WSS1          | YMR109W                 | MYO5          |
| YLR320W                                          | MMS22         | YOR327C                 | SNC2          |
| YBL021C                                          | HAP3          | YLR233C                 | EST1          |
| YLR456W                                          | YLR456W       | YIR009W                 | MSL1          |
| YDL042C                                          | SIR2          | YBR009C                 | HHF1          |
| YPL024W                                          | RMI1          | YFR036W                 | CDC26         |

| Predictions at threshold level 0.75 continued... |               |                         |               |
|--------------------------------------------------|---------------|-------------------------|---------------|
| Gene1 of predicted pair                          |               | Gene2 of predicted pair |               |
| Systematic Name                                  | Standard Name | Systematic Name         | Standard Name |
| YBR173C                                          | UMP1          | YPL057C                 | SUR1          |
| YMR054W                                          | STV1          | YML071C                 | COG8          |
| YLR386W                                          | VAC14         | YML095C                 | RAD10         |
| YIR005W                                          | IST3          | YGL252C                 | RTG2          |
| YIR009W                                          | MSL1          | YPR101W                 | SNT309        |
| YOR066W                                          | MSA1          | YBR036C                 | CSG2          |
| YHR056C                                          | RSC30         | YHR191C                 | CTF8          |
| YML095C                                          | RAD10         | YJR060W                 | CBF1          |
| YBR278W                                          | DPB3          | YOR304W                 | ISW2          |
| YLR079W                                          | SIC1          | YPL022W                 | RAD1          |
| YJL004C                                          | SYS1          | YKR030W                 | GMH1          |
| YGL237C                                          | HAP2          | YAL002W                 | VPS8          |
| YBR200W                                          | BEM1          | YJL136C                 | RPS21B        |
| YBL102W                                          | SFT2          | YDR202C                 | RAV2          |
| YLR288C                                          | MEC3          | YMR199W                 | CLN1          |
| YDR260C                                          | SWM1          | YDR254W                 | CHL4          |
| YOR191W                                          | RIS1          | YBR228W                 | SLX1          |
| YBR217W                                          | ATG12         | YNL087W                 | TCB2          |
| YDR507C                                          | GIN4          | YDR363W-A               | SEM1          |
| YGL212W                                          | VAM7          | YMR230W                 | RPS10B        |
| YDR293C                                          | SSD1          | YHR060W                 | VMA22         |
| YPL024W                                          | RMI1          | YPL253C                 | VIK1          |
| YGL237C                                          | HAP2          | YJR032W                 | CPR7          |
| YGR241C                                          | YAP1802       | YPL045W                 | VPS16         |
| YPR084W                                          | YPR084W       | YMR038C                 | CCS1          |
| YGL147C                                          | RPL9A         | YDL223C                 | HBT1          |
| YGL212W                                          | VAM7          | YGR020C                 | VMA7          |
| YJL004C                                          | SYS1          | YDR310C                 | SUM1          |
| YNL248C                                          | RPA49         | YLR254C                 | NDL1          |



| Predictions at threshold level 0.75 continued... |               |                         |               |
|--------------------------------------------------|---------------|-------------------------|---------------|
| Gene1 of predicted pair                          |               | Gene2 of predicted pair |               |
| Systematic Name                                  | Standard Name | Systematic Name         | Standard Name |
| YDL020C                                          | RPN4          | YPR046W                 | MCM16         |
| YFR010W                                          | UBP6          | YHL031C                 | GOS1          |
| YKR020W                                          | VPS51         | YNL079C                 | TPM1          |
| YIL159W                                          | BNR1          | YKR048C                 | NAP1          |
| YBL047C                                          | EDE1          | YBL072C                 | RPS8A         |
| YBR280C                                          | SAF1          | YDR310C                 | SUM1          |
| YHL002W                                          | HSE1          | YLR425W                 | TUS1          |
| YGR249W                                          | MGA1          | YER162C                 | RAD4          |
| YLR381W                                          | CTF3          | YGL237C                 | HAP2          |
| YDR097C                                          | MSH6          | YNL076W                 | MKS1          |
| YFR031C-A                                        | RPL2A         | YDL083C                 | RPS16B        |
| YGL252C                                          | RTG2          | YOL081W                 | IRA2          |
| YPL057C                                          | SUR1          | YHR039C-A               | VMA10         |
| YNL069C                                          | RPL16B        | YGL223C                 | COG1          |
| YNL215W                                          | IES2          | YDL006W                 | PTC1          |
| YOR132W                                          | VPS17         | YGL253W                 | HXK2          |
| YMR004W                                          | MVP1          | YEL043W                 | YEL043W       |
| YOL145C                                          | CTR9          | YPL057C                 | SUR1          |
| YKL048C                                          | ELM1          | YHR039C-A               | VMA10         |
| YBR173C                                          | UMP1          | YHR039C-A               | VMA10         |
| YLR216C                                          | CPR6          | YDR293C                 | SSD1          |
| YBR057C                                          | MUM2          | YMR038C                 | CCS1          |
| YJR106W                                          | ECM27         | YDR105C                 | TMS1          |
| YHR086W                                          | NAM8          | YDR378C                 | LSM6          |
| YKR072C                                          | SIS2          | YNL016W                 | PUB1          |
| YDL020C                                          | RPN4          | YDR207C                 | UME6          |
| YLR090W                                          | XDJ1          | YLR386W                 | VAC14         |
| YIL076W                                          | SEC28         | YOR270C                 | VPH1          |
| YGL078C                                          | DBP3          | YLR398C                 | SKI2          |

| Predictions at threshold level 0.75 continued... |               |                         |               |
|--------------------------------------------------|---------------|-------------------------|---------------|
| Gene1 of predicted pair                          |               | Gene2 of predicted pair |               |
| Systematic Name                                  | Standard Name | Systematic Name         | Standard Name |
| YMR133W                                          | REC114        | YJL183W                 | MNN11         |
| YHR200W                                          | RPN10         | YLR452C                 | SST2          |
| YNL243W                                          | SLA2          | YJL187C                 | SWE1          |
| YPL106C                                          | SSE1          | YJR032W                 | CPR7          |
| YDR477W                                          | SNF1          | YLR094C                 | GIS3          |
| YOR076C                                          | SKI7          | YPL057C                 | SUR1          |
| YPL253C                                          | VIK1          | YDL013W                 | SLX5          |
| YDR443C                                          | SSN2          | YKL139W                 | CTK1          |
| YNL032W                                          | SIW14         | YNL307C                 | MCK1          |
| YGL163C                                          | RAD54         | YPR046W                 | MCM16         |
| YIL053W                                          | RHR2          | YGL025C                 | PGD1          |
| YMR142C                                          | RPL13B        | YER044C                 | ERG28         |
| YDR076W                                          | RAD55         | YLR032W                 | RAD5          |
| YMR091C                                          | NPL6          | YLL026W                 | HSP104        |
| YPR036W                                          | VMA13         | YPR119W                 | CLB2          |
| YPR030W                                          | CSR2          | YMR230W                 | RPS10B        |
| YJR063W                                          | RPA12         | YLR410W                 | VIP1          |
| YNL307C                                          | MCK1          | YDR260C                 | SWM1          |
| YFL023W                                          | BUD27         | YPR046W                 | MCM16         |
| YGL060W                                          | YBP2          | YKL114C                 | APN1          |
| YNL206C                                          | RTT106        | YNL147W                 | LSM7          |
| YLR288C                                          | MEC3          | YDR146C                 | SWI5          |
| YJL172W                                          | CPS1          | YMR311C                 | GLC8          |
| YMR026C                                          | PEX12         | YPR046W                 | MCM16         |
| YER110C                                          | KAP123        | YKL048C                 | ELM1          |
| YLR216C                                          | CPR6          | YER114C                 | BOI2          |
| YDR293C                                          | SSD1          | YDR202C                 | RAV2          |
| YDL116W                                          | NUP84         | YMR284W                 | YKU70         |
| YLR093C                                          | NYV1          | YJL183W                 | MNN11         |

| Predictions at threshold level 0.75 continued... |               |                         |               |
|--------------------------------------------------|---------------|-------------------------|---------------|
| Gene1 of predicted pair                          |               | Gene2 of predicted pair |               |
| Systematic Name                                  | Standard Name | Systematic Name         | Standard Name |
| YGL212W                                          | VAM7          | YJR084W                 | CSN12         |
| YDR507C                                          | GIN4          | YPR040W                 | TIP41         |
| YDR254W                                          | CHL4          | YPL018W                 | CTF19         |
| YDR484W                                          | VPS52         | YCR053W                 | THR4          |
| YLL039C                                          | UBI4          | YOL044W                 | PEX15         |
| YLR191W                                          | PEX13         | YPR173C                 | VPS4          |
| YJL124C                                          | LSM1          | YIR005W                 | IST3          |
| YMR224C                                          | MRE11         | YLR093C                 | NYV1          |
| YDR176W                                          | NGG1          | YPR101W                 | SNT309        |
| YNL106C                                          | INP52         | YCL014W                 | BUD3          |
| YDL184C                                          | RPL41A        | YLR371W                 | ROM2          |
| YEL009C                                          | GCN4          | YDR146C                 | SWI5          |
| YMR055C                                          | BUB2          | YKL110C                 | KTI12         |
| YDR192C                                          | NUP42         | YKR095W                 | MLP1          |
| YBL101C                                          | ECM21         | YLR370C                 | ARC18         |
| YDL020C                                          | RPN4          | YLR292C                 | SEC72         |
| YJL124C                                          | LSM1          | YPL220W                 | RPL1A         |
| YDL052C                                          | SLC1          | YBR041W                 | FAT1          |
| YLR396C                                          | VPS33         | YGL198W                 | YIP4          |
| YMR153W                                          | NUP53         | YHR060W                 | VMA22         |
| YNL307C                                          | MCK1          | YLR254C                 | NDL1          |
| YBR274W                                          | CHK1          | YJL138C                 | TIF2          |
| YHR119W                                          | SET1          | YLR015W                 | BRE2          |
| YFR036W                                          | CDC26         | YML028W                 | TSA1          |
| YDR146C                                          | SWI5          | YOR140W                 | SFL1          |
| YPL024W                                          | RMI1          | YLR180W                 | SAM1          |
| YOR033C                                          | EXO1          | YMR231W                 | PEP5          |
| YBL008W                                          | HIR1          | YBR278W                 | DPB3          |
| YLR410W                                          | VIP1          | YGL252C                 | RTG2          |

| Predictions at threshold level 0.75 continued... |               |                         |               |
|--------------------------------------------------|---------------|-------------------------|---------------|
| Gene1 of predicted pair                          |               | Gene2 of predicted pair |               |
| Systematic Name                                  | Standard Name | Systematic Name         | Standard Name |
| YDL184C                                          | RPL41A        | YPL220W                 | RPL1A         |
| YGL060W                                          | YBP2          | YMR198W                 | CIK1          |
| YER129W                                          | SAK1          | YDR028C                 | REG1          |
| YLR386W                                          | VAC14         | YGL237C                 | HAP2          |
| YDR443C                                          | SSN2          | YMR311C                 | GLC8          |
| YPR046W                                          | MCM16         | YDR183W                 | PLP1          |
| YKL048C                                          | ELM1          | YJR135C                 | MCM22         |
| YHR079C                                          | IRE1          | YCR053W                 | THR4          |
| YPL022W                                          | RAD1          | YPR119W                 | CLB2          |
| YJL058C                                          | BIT61         | YJR035W                 | RAD26         |
| YKL139W                                          | CTK1          | YKR035W-A               | DID2          |
| YMR199W                                          | CLN1          | YMR231W                 | PEP5          |
| YBR108W                                          | YBR108W       | YGR188C                 | BUB1          |
| YDR108W                                          | GSG1          | YGR071C                 | YGR071C       |
| YNL201C                                          | PSY2          | YHR111W                 | UBA4          |
| YIL076W                                          | SEC28         | YOR106W                 | VAM3          |
| YHR073W                                          | OSH3          | YIL148W                 | RPL40A        |
| YDR395W                                          | SXM1          | YML103C                 | NUP188        |
| YHL031C                                          | GOS1          | YEL013W                 | VAC8          |
| YGR108W                                          | CLB1          | YML016C                 | PPZ1          |
| YGR014W                                          | MSB2          | YLR398C                 | SKI2          |
| YOR304W                                          | ISW2          | YMR042W                 | ARG80         |
| YMR216C                                          | SKY1          | YCL037C                 | SRO9          |
| YLR234W                                          | TOP3          | YJR035W                 | RAD26         |
| YCR084C                                          | TUP1          | YBR009C                 | HHF1          |
| YIL076W                                          | SEC28         | YOR109W                 | INP53         |
| YLR360W                                          | VPS38         | YPL234C                 | TFP3          |
| YLR441C                                          | RPS1A         | YML071C                 | COG8          |
| YLR079W                                          | SIC1          | YIL148W                 | RPL40A        |

| Predictions at threshold level 0.75 continued... |               |                         |               |
|--------------------------------------------------|---------------|-------------------------|---------------|
| Gene1 of predicted pair                          |               | Gene2 of predicted pair |               |
| Systematic Name                                  | Standard Name | Systematic Name         | Standard Name |
| YPL253C                                          | VIK1          | YHR114W                 | BZZ1          |
| YKL139W                                          | CTK1          | YLR381W                 | CTF3          |
| YER110C                                          | KAP123        | YMR125W                 | STO1          |
| YDR223W                                          | CRF1          | YJL141C                 | YAK1          |
| YBL047C                                          | EDE1          | YJL183W                 | MNN11         |
| YOR358W                                          | HAP5          | YPR046W                 | MCM16         |
| YBL051C                                          | PIN4          | YDR309C                 | GIC2          |
| YJR032W                                          | CPR7          | YPR030W                 | CSR2          |
| YAL024C                                          | LTE1          | YJR140C                 | HIR3          |
| YDR261C                                          | EXG2          | YCR053W                 | THR4          |
| YDR245W                                          | MNN10         | YER139C                 | YER139C       |
| YGR252W                                          | GCN5          | YNL079C                 | TPM1          |
| YKL025C                                          | PAN3          | YGR019W                 | UGA1          |
| YPL137C                                          | GIP3          | YJL183W                 | MNN11         |
| YKL048C                                          | ELM1          | YPR120C                 | CLB5          |
| YNL201C                                          | PSY2          | YML016C                 | PPZ1          |
| YJL124C                                          | LSM1          | YER122C                 | GLO3          |
| YKL116C                                          | PRR1          | YER144C                 | UBP5          |
| YDL116W                                          | NUP84         | YBR290W                 | BSD2          |
| YJL172W                                          | CPS1          | YMR214W                 | SCJ1          |
| YLR360W                                          | VPS38         | YJR032W                 | CPR7          |
| YPL042C                                          | SSN3          | YPL161C                 | BEM4          |
| YHR039C-A                                        | VMA10         | YER120W                 | SCS2          |
| YPL024W                                          | RMI1          | YBR019C                 | GAL10         |
| YLR441C                                          | RPS1A         | YER122C                 | GLO3          |
| YER110C                                          | KAP123        | YNL031C                 | HHT2          |
| YOR112W                                          | CEX1          | YNL107W                 | YAF9          |
| YBR195C                                          | MSI1          | YDR076W                 | RAD55         |
| YIL159W                                          | BNR1          | YLR094C                 | GIS3          |

| Predictions at threshold level 0.75 continued... |               |                         |               |
|--------------------------------------------------|---------------|-------------------------|---------------|
| Gene1 of predicted pair                          |               | Gene2 of predicted pair |               |
| Systematic Name                                  | Standard Name | Systematic Name         | Standard Name |
| YBR030W                                          | YBR030W       | YBR200W                 | BEM1          |
| YKR082W                                          | NUP133        | YER105C                 | NUP157        |
| YOR033C                                          | EXO1          | YDL013W                 | SLX5          |
| YJR040W                                          | GEF1          | YOR327C                 | SNC2          |
| YLR292C                                          | SEC72         | YOR132W                 | VPS17         |
| YIL053W                                          | RHR2          | YBL103C                 | RTG3          |
| YLR360W                                          | VPS38         | YDR456W                 | NHX1          |
| YFR010W                                          | UBP6          | YPL079W                 | RPL21B        |
| YLL007C                                          | YLL007C       | YLR381W                 | CTF3          |
| YDR477W                                          | SNF1          | YDR422C                 | SIP1          |
| YDR101C                                          | ARX1          | YLR325C                 | RPL38         |
| YNL094W                                          | APP1          | YPR154W                 | PIN3          |
| YGL115W                                          | SNF4          | YBL025W                 | RRN10         |
| YLR079W                                          | SIC1          | YJL006C                 | CTK2          |
| YOR212W                                          | STE4          | YGR152C                 | RSR1          |
| YMR167W                                          | MLH1          | YKL101W                 | HSL1          |
| YIL159W                                          | BNR1          | YFR010W                 | UBP6          |
| YBR030W                                          | YBR030W       | YPR030W                 | CSR2          |
| YLR150W                                          | STM1          | YNL307C                 | MCK1          |
| YHR156C                                          | LIN1          | YBL025W                 | RRN10         |
| YDL223C                                          | HBT1          | YNL238W                 | KEX2          |
| YCL063W                                          | VAC17         | YFR021W                 | ATG18         |
| YBR200W                                          | BEM1          | YOR035C                 | SHE4          |
| YOR106W                                          | VAM3          | YPR032W                 | SRO7          |
| YNL093W                                          | YPT53         | YNL044W                 | YIP3          |
| YNL041C                                          | COG6          | YBL025W                 | RRN10         |
| YMR311C                                          | GLC8          | YBR036C                 | CSG2          |
| YPL256C                                          | CLN2          | YER027C                 | GAL83         |
| YLR360W                                          | VPS38         | YOR140W                 | SFL1          |

| Predictions at threshold level 0.75 continued... |               |                         |               |
|--------------------------------------------------|---------------|-------------------------|---------------|
| Gene1 of predicted pair                          |               | Gene2 of predicted pair |               |
| Systematic Name                                  | Standard Name | Systematic Name         | Standard Name |
| YLR079W                                          | SIC1          | YOR312C                 | RPL20B        |
| YER144C                                          | UBP5          | YLR093C                 | NYV1          |
| YBR126C                                          | TPS1          | YOL081W                 | IRA2          |
| YDL155W                                          | CLB3          | YDR183W                 | PLP1          |
| YMR172W                                          | HOT1          | YDR318W                 | MCM21         |
| YDL002C                                          | NHP10         | YNL199C                 | GCR2          |
| YDR385W                                          | EFT2          | YGL200C                 | EMP24         |
| YBR083W                                          | TEC1          | YNR006W                 | VPS27         |
| YOL018C                                          | TLG2          | YNL051W                 | COG5          |
| YGL033W                                          | HOP2          | YKL139W                 | CTK1          |
| YLR043C                                          | TRX1          | YGL212W                 | VAM7          |
| YML115C                                          | VAN1          | YBL101C                 | ECM21         |
| YMR142C                                          | RPL13B        | YDR310C                 | SUM1          |
| YGL115W                                          | SNF4          | YGR105W                 | VMA21         |
| YCL001W                                          | RER1          | YPL161C                 | BEM4          |
| YBR200W                                          | BEM1          | YJL124C                 | LSM1          |
| YIL053W                                          | RHR2          | YPR030W                 | CSR2          |
| YNL225C                                          | CNM67         | YHR115C                 | DMA1          |
| YPL256C                                          | CLN2          | YPR119W                 | CLB2          |
| YNL116W                                          | DMA2          | YLR425W                 | TUS1          |
| YLR150W                                          | STM1          | YGL246C                 | RAI1          |
| YOL067C                                          | RTG1          | YHL002W                 | HSE1          |
| YNL218W                                          | MGS1          | YHR167W                 | THP2          |
| YJL154C                                          | VPS35         | YJL053W                 | PEP8          |
| YHR156C                                          | LIN1          | YKL048C                 | ELM1          |
| YPL057C                                          | SUR1          | YJL183W                 | MNN11         |
| YDR080W                                          | VPS41         | YGL223C                 | COG1          |
| YBR126C                                          | TPS1          | YNL032W                 | SIW14         |
| YPR036W                                          | VMA13         | YGL003C                 | CDH1          |

| Predictions at threshold level 0.75 continued... |               |                         |               |
|--------------------------------------------------|---------------|-------------------------|---------------|
| Gene1 of predicted pair                          |               | Gene2 of predicted pair |               |
| Systematic Name                                  | Standard Name | Systematic Name         | Standard Name |
| YNL041C                                          | COG6          | YBR036C                 | CSG2          |
| YPL079W                                          | RPL21B        | YHR077C                 | NMD2          |
| YPL024W                                          | RMI1          | YBL058W                 | SHP1          |
| YMR224C                                          | MRE11         | YDL013W                 | SLX5          |
| YNL068C                                          | FKH2          | YGL066W                 | SGF73         |
| YJL183W                                          | MNN11         | YOR327C                 | SNC2          |
| YKL160W                                          | ELF1          | YER139C                 | YER139C       |
| YLR150W                                          | STM1          | YGL163C                 | RAD54         |
| YBL058W                                          | SHP1          | YOR290C                 | SNF2          |
| YMR153W                                          | NUP53         | YJR032W                 | CPR7          |
| YER047C                                          | SAP1          | YPR119W                 | CLB2          |
| YJR024C                                          | MDE1          | YMR125W                 | STO1          |
| YFR040W                                          | SAP155        | YPL256C                 | CLN2          |
| YNL068C                                          | FKH2          | YMR199W                 | CLN1          |
| YDR108W                                          | GSG1          | YGL115W                 | SNF4          |
| YDR245W                                          | MNN10         | YGL153W                 | PEX14         |
| YMR224C                                          | MRE11         | YJL183W                 | MNN11         |
| YPL022W                                          | RAD1          | YLR032W                 | RAD5          |
| YPR051W                                          | MAK3          | YGL223C                 | COG1          |
| YLR360W                                          | VPS38         | YJL004C                 | SYS1          |
| YOR109W                                          | INP53         | YEL053C                 | MAK10         |
| YNL069C                                          | RPL16B        | YMR055C                 | BUB2          |
| YKR001C                                          | VPS1          | YPL195W                 | APL5          |
| YMR198W                                          | CIK1          | YDL047W                 | SIT4          |
| YKR061W                                          | KTR2          | YHR013C                 | ARD1          |
| YNL215W                                          | IES2          | YOR038C                 | HIR2          |
| YPL161C                                          | BEM4          | YNL229C                 | URE2          |
| YOR140W                                          | SFL1          | YER096W                 | SHC1          |
| YOR109W                                          | INP53         | YDL006W                 | PTC1          |



| Predictions at threshold level 0.75 continued... |               |                         |               |
|--------------------------------------------------|---------------|-------------------------|---------------|
| Gene1 of predicted pair                          |               | Gene2 of predicted pair |               |
| Systematic Name                                  | Standard Name | Systematic Name         | Standard Name |
| YGL033W                                          | HOP2          | YDL184C                 | RPL41A        |
| YJR059W                                          | PTK2          | YER115C                 | SPR6          |
| YML016C                                          | PPZ1          | YIL008W                 | URM1          |
| YJR140C                                          | HIR3          | YEL013W                 | VAC8          |
| YPL037C                                          | EGD1          | YMR054W                 | STV1          |
| YNL054W                                          | VAC7          | YJR135C                 | MCM22         |
| YOL148C                                          | SPT20         | YBR089C-A               | NHP6B         |
| YBR173C                                          | UMP1          | YMR311C                 | GLC8          |
| YMR004W                                          | MVP1          | YJR032W                 | CPR7          |
| YKL129C                                          | MYO3          | YLR370C                 | ARC18         |
| YBL103C                                          | RTG3          | YLR452C                 | SST2          |
| YOR132W                                          | VPS17         | YGR054W                 | YGR054W       |
| YPL234C                                          | TFP3          | YJR033C                 | RAV1          |
| YGR072W                                          | UPF3          | YOR069W                 | VPS5          |
| YOR127W                                          | RGA1          | YOR109W                 | INP53         |
| YMR153W                                          | NUP53         | YLR441C                 | RPS1A         |
| YGR135W                                          | PRE9          | YGR188C                 | BUB1          |
| YLR083C                                          | EMP70         | YEL043W                 | YEL043W       |
| YGR072W                                          | UPF3          | YJR060W                 | CBF1          |
| YDR378C                                          | LSM6          | YDR363W-A               | SEM1          |
| YPR018W                                          | RLF2          | YMR199W                 | CLN1          |
| YPR072W                                          | NOT5          | YJL164C                 | TPK1          |
| YNR052C                                          | POP2          | YGR270W                 | YTA7          |
| YNL054W                                          | VAC7          | YNL307C                 | MCK1          |
| YGR239C                                          | PEX21         | YIL160C                 | POT1          |
| YLR441C                                          | RPS1A         | YML001W                 | YPT7          |
| YLR370C                                          | ARC18         | YKL041W                 | VPS24         |
| YHR200W                                          | RPN10         | YDL077C                 | VAM6          |
| YGR054W                                          | YGR054W       | YBR114W                 | RAD16         |

| Predictions at threshold level 0.75 continued... |               |                         |               |
|--------------------------------------------------|---------------|-------------------------|---------------|
| Gene1 of predicted pair                          |               | Gene2 of predicted pair |               |
| Systematic Name                                  | Standard Name | Systematic Name         | Standard Name |
| YDR443C                                          | SSN2          | YDR484W                 | VPS52         |
| YLR192C                                          | HCR1          | YER044C                 | ERG28         |
| YLR360W                                          | VPS38         | YGL054C                 | ERV14         |
| YOR275C                                          | RIM20         | YGL163C                 | RAD54         |
| YOR337W                                          | TEA1          | YKR099W                 | BAS1          |
| YLR061W                                          | RPL22A        | YBR082C                 | UBC4          |
| YGL212W                                          | VAM7          | YHR060W                 | VMA22         |
| YKL006W                                          | RPL14A        | YKL032C                 | IXR1          |
| YPL240C                                          | HSP82         | YJR086W                 | STE18         |
| YJL183W                                          | MNN11         | YLR425W                 | TUS1          |
| YBR084C-A                                        | RPL19A        | YDR379W                 | RGA2          |
| YKL126W                                          | YPK1          | YNL076W                 | MKS1          |
| YPR046W                                          | MCM16         | YCR053W                 | THR4          |
| YML058W                                          | SML1          | YLR079W                 | SIC1          |
| YPL253C                                          | VIK1          | YDR289C                 | RTT103        |
| YMR142C                                          | RPL13B        | YFL023W                 | BUD27         |
| YDR146C                                          | SWI5          | YBR200W                 | BEM1          |
| YDR289C                                          | RTT103        | YMR038C                 | CCS1          |
| YLR292C                                          | SEC72         | YHL002W                 | HSE1          |
| YHR041C                                          | SRB2          | YBR089C-A               | NHP6B         |
| YMR016C                                          | SOK2          | YHR060W                 | VMA22         |
| YNR052C                                          | POP2          | YHR115C                 | DMA1          |
| YIL053W                                          | RHR2          | YDR477W                 | SNF1          |
| YOR080W                                          | DIA2          | YGL175C                 | SAE2          |
| YHR167W                                          | THP2          | YOR124C                 | UBP2          |
| YIL053W                                          | RHR2          | YDR484W                 | VPS52         |
| YOR043W                                          | WHI2          | YMR214W                 | SCJ1          |
| YNL087W                                          | TCB2          | YDR261C                 | EXG2          |
| YBL058W                                          | SHP1          | YGL003C                 | CDH1          |

| Predictions at threshold level 0.75 continued... |               |                         |               |
|--------------------------------------------------|---------------|-------------------------|---------------|
| Gene1 of predicted pair                          |               | Gene2 of predicted pair |               |
| Systematic Name                                  | Standard Name | Systematic Name         | Standard Name |
| YBL047C                                          | EDE1          | YLR370C                 | ARC18         |
| YBR127C                                          | VMA2          | YPL234C                 | TFP3          |
| YFR021W                                          | ATG18         | YLR431C                 | ATG23         |
| YBL101C                                          | ECM21         | YKL041W                 | VPS24         |
| YHR200W                                          | RPN10         | YNL107W                 | YAF9          |
| YHR134W                                          | WSS1          | YJL183W                 | MNN11         |
| YHR161C                                          | YAP1801       | YDR358W                 | GGA1          |
| YBR171W                                          | SEC66         | YER162C                 | RAD4          |
| YOR106W                                          | VAM3          | YLR396C                 | VPS33         |
| YDR076W                                          | RAD55         | YHR010W                 | RPL27A        |
| YHR012W                                          | VPS29         | YKL119C                 | VPH2          |
| YDR260C                                          | SWM1          | YGL003C                 | CDH1          |
| YPR185W                                          | ATG13         | YPR119W                 | CLB2          |
| YLR079W                                          | SIC1          | YDR171W                 | HSP42         |
| YER044C                                          | ERG28         | YCR053W                 | THR4          |
| YDL160C                                          | DHH1          | YDR448W                 | ADA2          |
| YOR001W                                          | RRP6          | YPR120C                 | CLB5          |
| YFR031C-A                                        | RPL2A         | YGL124C                 | MON1          |
| YIL159W                                          | BNR1          | YPR040W                 | TIP41         |
| YHR111W                                          | UBA4          | YIR005W                 | IST3          |
| YHR144C                                          | DCD1          | YPL022W                 | RAD1          |
| YLR418C                                          | CDC73         | YHR056C                 | RSC30         |
| YER110C                                          | KAP123        | YDR183W                 | PLP1          |
| YDR225W                                          | HTA1          | YBR010W                 | HHT1          |
| YAL024C                                          | LTE1          | YGL252C                 | RTG2          |
| YBL008W                                          | HIR1          | YPL253C                 | VIK1          |
| YLR381W                                          | CTF3          | YDR144C                 | MKC7          |
| YGL133W                                          | ITC1          | YNL229C                 | URE2          |
| YNL243W                                          | SLA2          | YNL271C                 | BNI1          |

| Predictions at threshold level 0.75 continued... |               |                         |               |
|--------------------------------------------------|---------------|-------------------------|---------------|
| Gene1 of predicted pair                          |               | Gene2 of predicted pair |               |
| Systematic Name                                  | Standard Name | Systematic Name         | Standard Name |
| YPL105C                                          | YPL105C       | YDR207C                 | UME6          |
| YJL053W                                          | PEP8          | YGL095C                 | VPS45         |
| YDL160C                                          | DHH1          | YNL147W                 | LSM7          |
| YDR080W                                          | VPS41         | YPL234C                 | TFP3          |
| YPL129W                                          | TAF14         | YBR112C                 | CYC8          |
| YLR370C                                          | ARC18         | YER040W                 | GLN3          |
| YLR093C                                          | NYV1          | YJL095W                 | BCK1          |
| YHL031C                                          | GOS1          | YDL077C                 | VAM6          |
| YDR225W                                          | HTA1          | YBR289W                 | SNF5          |
| YPL120W                                          | VPS30         | YPR032W                 | SRO7          |
| YJR063W                                          | RPA12         | YFR036W                 | CDC26         |
| YNL098C                                          | RAS2          | YIL033C                 | BCY1          |
| YNL087W                                          | TCB2          | YNL041C                 | COG6          |
| YIL076W                                          | SEC28         | YNL107W                 | YAF9          |
| YER144C                                          | UBP5          | YML001W                 | YPT7          |
| YBR108W                                          | YBR108W       | YHR114W                 | BZZ1          |
| YDR146C                                          | SWI5          | YOR106W                 | VAM3          |
| YML115C                                          | VAN1          | YMR038C                 | CCS1          |
| YHR111W                                          | UBA4          | YIL008W                 | URM1          |
| YLL039C                                          | UBI4          | YLR425W                 | TUS1          |
| YLR094C                                          | GIS3          | YJR084W                 | CSN12         |
| YML058W                                          | SML1          | YIL066C                 | RNR3          |
| YPR036W                                          | VMA13         | YJL095W                 | BCK1          |
| YHR167W                                          | THP2          | YAL002W                 | VPS8          |
| YPL018W                                          | CTF19         | YMR038C                 | CCS1          |
| YHL002W                                          | HSE1          | YAR014C                 | BUD14         |
| YBR030W                                          | YBR030W       | YOR290C                 | SNF2          |
| YOR001W                                          | RRP6          | YER041W                 | YEN1          |
| YNL288W                                          | CAF40         | YHR134W                 | WSS1          |

| Predictions at threshold level 0.75 continued... |               |                         |               |
|--------------------------------------------------|---------------|-------------------------|---------------|
| Gene1 of predicted pair                          |               | Gene2 of predicted pair |               |
| Systematic Name                                  | Standard Name | Systematic Name         | Standard Name |
| YGR072W                                          | UPF3          | YDR202C                 | RAV2          |
| YDR477W                                          | SNF1          | YNL032W                 | SIW14         |
| YNR052C                                          | POP2          | YBL079W                 | NUP170        |
| YDR378C                                          | LSM6          | YGL200C                 | EMP24         |
| YJL053W                                          | PEP8          | YMR054W                 | STV1          |
| YMR055C                                          | BUB2          | YGR270W                 | YTA7          |
| YDR443C                                          | SSN2          | YPL037C                 | EGD1          |
| YKR072C                                          | SIS2          | YDR293C                 | SSD1          |
| YGR135W                                          | PRE9          | YKL041W                 | VPS24         |
| YER116C                                          | SLX8          | YKR095W                 | MLP1          |
| YJL154C                                          | VPS35         | YER120W                 | SCS2          |
| YBR171W                                          | SEC66         | YLR233C                 | EST1          |
| YEL060C                                          | PRB1          | YLR180W                 | SAM1          |
| YNL032W                                          | SIW14         | YER044C                 | ERG28         |
| YDL160C                                          | DHH1          | YDR378C                 | LSM6          |
| YGL253W                                          | HXK2          | YDR310C                 | SUM1          |
| YJR056C                                          | YJR056C       | YDL192W                 | ARF1          |
| YML038C                                          | YMD8          | YGL054C                 | ERV14         |
| YFR010W                                          | UBP6          | YDR289C                 | RTT103        |
| YBR030W                                          | YBR030W       | YDR310C                 | SUM1          |
| YOR043W                                          | WHI2          | YDL192W                 | ARF1          |
| YDR264C                                          | AKR1          | YDL047W                 | SIT4          |
| YLR192C                                          | HCR1          | YLR360W                 | VPS38         |
| YNL243W                                          | SLA2          | YAL030W                 | SNC1          |
| YJR040W                                          | GEF1          | YPL105C                 | YPL105C       |
| YDL160C                                          | DHH1          | YJL187C                 | SWE1          |
| YHR079C                                          | IRE1          | YFL031W                 | HAC1          |
| YKL101W                                          | HSL1          | YDR310C                 | SUM1          |
| YER139C                                          | YER139C       | YCR053W                 | THR4          |

| Predictions at threshold level 0.75 continued... |               |                         |               |
|--------------------------------------------------|---------------|-------------------------|---------------|
| Gene1 of predicted pair                          |               | Gene2 of predicted pair |               |
| Systematic Name                                  | Standard Name | Systematic Name         | Standard Name |
| YGL212W                                          | VAM7          | YLR320W                 | MMS22         |
| YPL137C                                          | GIP3          | YOL121C                 | RPS19A        |
| YIL076W                                          | SEC28         | YER162C                 | RAD4          |
| YMR095C                                          | SNO1          | YGL003C                 | CDH1          |
| YAL024C                                          | LTE1          | YHR060W                 | VMA22         |
| YBL058W                                          | SHP1          | YJR032W                 | CPR7          |
| YGL115W                                          | SNF4          | YMR214W                 | SCJ1          |
| YMR026C                                          | PEX12         | YGR077C                 | PEX8          |
| YDR244W                                          | PEX5          | YAL055W                 | PEX22         |
| YMR199W                                          | CLN1          | YLR352W                 | YLR352W       |
| YGL190C                                          | CDC55         | YAL011W                 | SWC3          |
| YDL020C                                          | RPN4          | YKL119C                 | VPH2          |
| YMR016C                                          | SOK2          | YFR036W                 | CDC26         |
| YOR145C                                          | PNO1          | YPL240C                 | HSP82         |
| YOR035C                                          | SHE4          | YER139C                 | YER139C       |
| YDR129C                                          | SAC6          | YML071C                 | COG8          |
| YOR140W                                          | SFL1          | YJL095W                 | BCK1          |
| YOR106W                                          | VAM3          | YGL124C                 | MON1          |
| YJL060W                                          | BNA3          | YMR198W                 | CIK1          |
| YPR018W                                          | RLF2          | YGR188C                 | BUB1          |
| YMR055C                                          | BUB2          | YGL163C                 | RAD54         |
| YMR199W                                          | CLN1          | YJR090C                 | GRR1          |
| YDR245W                                          | MNN10         | YDL006W                 | PTC1          |
| YPL037C                                          | EGD1          | YOR066W                 | MSA1          |
| YGL208W                                          | SIP2          | YPR119W                 | CLB2          |
| YGL066W                                          | SGF73         | YOR290C                 | SNF2          |
| YJL176C                                          | SWI3          | YJR140C                 | HIR3          |
| YEL065W                                          | SIT1          | YJL095W                 | BCK1          |
| YPL161C                                          | BEM4          | YHR039C-A               | VMA10         |

| Predictions at threshold level 0.75 continued... |               |                         |               |
|--------------------------------------------------|---------------|-------------------------|---------------|
| Gene1 of predicted pair                          |               | Gene2 of predicted pair |               |
| Systematic Name                                  | Standard Name | Systematic Name         | Standard Name |
| YOR195W                                          | SLK19         | YOR080W                 | DIA2          |
| YNL236W                                          | SIN4          | YPL018W                 | CTF19         |
| YJR021C                                          | REC107        | YGL090W                 | LIF1          |
| YMR198W                                          | CIK1          | YPL106C                 | SSE1          |
| YOR327C                                          | SNC2          | YMR311C                 | GLC8          |
| YDR379W                                          | RGA2          | YIL008W                 | URM1          |
| YER107C                                          | GLE2          | YDR485C                 | VPS72         |
| YJL006C                                          | CTK2          | YPR119W                 | CLB2          |
| YFR021W                                          | ATG18         | YML059C                 | NTE1          |
| YBR057C                                          | MUM2          | YLR150W                 | STM1          |
| YPL022W                                          | RAD1          | YNL107W                 | YAF9          |
| YOR069W                                          | VPS5          | YER122C                 | GLO3          |
| YDL006W                                          | PTC1          | YBL101C                 | ECM21         |
| YLR381W                                          | CTF3          | YML112W                 | CTK3          |
| YNR052C                                          | POP2          | YPR120C                 | CLB5          |
| YDR004W                                          | RAD57         | YML028W                 | TSA1          |
| YGR019W                                          | UGA1          | YLR292C                 | SEC72         |
| YCR077C                                          | PAT1          | YNL079C                 | TPM1          |
| YBL103C                                          | RTG3          | YOL081W                 | IRA2          |
| YDR363W-A                                        | SEM1          | YDR071C                 | PAA1          |
| YOR005C                                          | DNL4          | YLR265C                 | NEJ1          |
| YGR184C                                          | UBR1          | YDL155W                 | CLB3          |
| YNL243W                                          | SLA2          | YNL238W                 | KEX2          |
| YMR139W                                          | RIM11         | YML099C                 | ARG81         |
| YNL032W                                          | SIW14         | YOR327C                 | SNC2          |
| YER087C-B                                        | SBH1          | YOR026W                 | BUB3          |
| YOL111C                                          | MDY2          | YHR039C-A               | VMA10         |
| YNL264C                                          | PDR17         | YBR194W                 | SOY1          |
| YPR017C                                          | DSS4          | YML001W                 | YPT7          |

| Predictions at threshold level 0.75 continued... |               |                         |               |
|--------------------------------------------------|---------------|-------------------------|---------------|
| Gene1 of predicted pair                          |               | Gene2 of predicted pair |               |
| Systematic Name                                  | Standard Name | Systematic Name         | Standard Name |
| YPL042C                                          | SSN3          | YJL124C                 | LSM1          |
| YAL024C                                          | LTE1          | YGR152C                 | RSR1          |
| YNL079C                                          | TPM1          | YER049W                 | TPA1          |
| YKR035W-A                                        | DID2          | YER040W                 | GLN3          |
| YDR329C                                          | PEX3          | YLR191W                 | PEX13         |
| YMR224C                                          | MRE11         | YGR270W                 | YTA7          |
| YLR441C                                          | RPS1A         | YOR078W                 | BUD21         |
| YBR084C-A                                        | RPL19A        | YGL163C                 | RAD54         |
| YNL309W                                          | STB1          | YDL047W                 | SIT4          |
| YPL213W                                          | LEA1          | YDL155W                 | CLB3          |
| YML109W                                          | ZDS2          | YMR032W                 | HOF1          |
| YMR016C                                          | SOK2          | YIL038C                 | NOT3          |
| YPL037C                                          | EGD1          | YJR060W                 | CBF1          |
| YMR133W                                          | REC114        | YMR311C                 | GLC8          |
| YJL172W                                          | CPS1          | YPL037C                 | EGD1          |
| YLR058C                                          | SHM2          | YBR200W                 | BEM1          |
| YIL034C                                          | CAP2          | YIL133C                 | RPL16A        |
| YOR033C                                          | EXO1          | YLR352W                 | YLR352W       |
| YEL043W                                          | YEL043W       | YOL108C                 | INO4          |
| YGL033W                                          | HOP2          | YNR072W                 | HXT17         |
| YJL124C                                          | LSM1          | YBL079W                 | NUP170        |
| YMR004W                                          | MVP1          | YEL051W                 | VMA8          |
| YDR484W                                          | VPS52         | YHR012W                 | VPS29         |
| YDL160C                                          | DHH1          | YDR507C                 | GIN4          |
| YLR093C                                          | NYV1          | YER040W                 | GLN3          |
| YNL069C                                          | RPL16B        | YJR040W                 | GEF1          |
| YLR095C                                          | IOC2          | YBR126C                 | TPS1          |
| YKL025C                                          | PAN3          | YGL094C                 | PAN2          |
| YKR048C                                          | NAP1          | YKL101W                 | HSL1          |



| Predictions at threshold level 0.75 continued... |               |                         |               |
|--------------------------------------------------|---------------|-------------------------|---------------|
| Gene1 of predicted pair                          |               | Gene2 of predicted pair |               |
| Systematic Name                                  | Standard Name | Systematic Name         | Standard Name |
| YJR032W                                          | CPR7          | YJR033C                 | RAV1          |
| YOR112W                                          | CEX1          | YPL120W                 | VPS30         |
| YHR098C                                          | SFB3          | YNL233W                 | BNI4          |
| YOR101W                                          | RAS1          | YGL025C                 | PGD1          |
| YER068W                                          | MOT2          | YGL094C                 | PAN2          |
| YBL102W                                          | SFT2          | YPL037C                 | EGD1          |
| YHL006C                                          | SHU1          | YLR376C                 | PSY3          |
| YDR156W                                          | RPA14         | YFR036W                 | CDC26         |
| YBR258C                                          | SHG1          | YHR115C                 | DMA1          |
| YFR031C-A                                        | RPL2A         | YEL053C                 | MAK10         |
| YML103C                                          | NUP188        | YMR125W                 | STO1          |
| YPR017C                                          | DSS4          | YHR012W                 | VPS29         |
| YMR224C                                          | MRE11         | YKL101W                 | HSL1          |
| YJL117W                                          | PHO86         | YMR038C                 | CCS1          |
| YBL102W                                          | SFT2          | YOR327C                 | SNC2          |
| YGR072W                                          | UPF3          | YNR032W                 | PPG1          |
| YNL227C                                          | JJJ1          | YBR119W                 | MUD1          |
| YGR019W                                          | UGA1          | YMR109W                 | MYO5          |
| YAL024C                                          | LTE1          | YNL054W                 | VAC7          |
| YPL115C                                          | BEM3          | YLR234W                 | TOP3          |
| YNL069C                                          | RPL16B        | YHR039C-A               | VMA10         |
| YMR231W                                          | PEP5          | YOR368W                 | RAD17         |
| YKL139W                                          | CTK1          | YOR308C                 | SNU66         |
| YLR064W                                          | YLR064W       | YCL034W                 | LSB5          |
| YBR057C                                          | MUM2          | YPR120C                 | CLB5          |
| YNL106C                                          | INP52         | YGL031C                 | RPL24A        |
| YDL020C                                          | RPN4          | YGL163C                 | RAD54         |
| YLR216C                                          | CPR6          | YAR014C                 | BUD14         |
| YJL138C                                          | TIF2          | YOL081W                 | IRA2          |

| Predictions at threshold level 0.75 continued... |               |                         |               |
|--------------------------------------------------|---------------|-------------------------|---------------|
| Gene1 of predicted pair                          |               | Gene2 of predicted pair |               |
| Systematic Name                                  | Standard Name | Systematic Name         | Standard Name |
| YIL156W                                          | UBP7          | YKL129C                 | MYO3          |
| YML115C                                          | VAN1          | YMR205C                 | PFK2          |
| YHR178W                                          | STB5          | YDL002C                 | NHP10         |
| YER116C                                          | SLX8          | YHR060W                 | VMA22         |
| YML071C                                          | COG8          | YBR181C                 | RPS6B         |
| YPR084W                                          | YPR084W       | YOL108C                 | INO4          |
| YML115C                                          | VAN1          | YKL080W                 | VMA5          |
| YER087C-B                                        | SBH1          | YGR152C                 | RSR1          |
| YMR172W                                          | HOT1          | YBR107C                 | IML3          |
| YBR171W                                          | SEC66         | YKL048C                 | ELM1          |
| YFR031C-A                                        | RPL2A         | YLR180W                 | SAM1          |
| YMR198W                                          | CIK1          | YGR014W                 | MSB2          |
| YPR051W                                          | MAK3          | YHR012W                 | VPS29         |
| YGR252W                                          | GCN5          | YIL038C                 | NOT3          |
| YOR106W                                          | VAM3          | YLR371W                 | ROM2          |
| YLR095C                                          | IOC2          | YNR072W                 | HXT17         |
| YOR132W                                          | VPS17         | YOR327C                 | SNC2          |
| YMR109W                                          | MYO5          | YJL183W                 | MNN11         |
| YMR199W                                          | CLN1          | YHR205W                 | SCH9          |
| YEL065W                                          | SIT1          | YNL236W                 | SIN4          |
| YNL215W                                          | IES2          | YOR001W                 | RRP6          |
| YMR080C                                          | NAM7          | YGR071C                 | YGR071C       |
| YLR337C                                          | VRP1          | YBR108W                 | YBR108W       |
| YOR127W                                          | RGA1          | YPL253C                 | VIK1          |
| YJL127C                                          | SPT10         | YPR120C                 | CLB5          |
| YLR360W                                          | VPS38         | YCL001W                 | RER1          |
| YKL025C                                          | PAN3          | YLR386W                 | VAC14         |
| YLR135W                                          | SLX4          | YCL037C                 | SRO9          |
| YOR127W                                          | RGA1          | YJL095W                 | BCK1          |

| Predictions at threshold level 0.75 continued... |               |                         |               |
|--------------------------------------------------|---------------|-------------------------|---------------|
| Gene1 of predicted pair                          |               | Gene2 of predicted pair |               |
| Systematic Name                                  | Standard Name | Systematic Name         | Standard Name |
| YJR032W                                          | CPR7          | YML071C                 | COG8          |
| YMR080C                                          | NAM7          | YJL176C                 | SWI3          |
| YBR131W                                          | CCZ1          | YER122C                 | GLO3          |
| YIL076W                                          | SEC28         | YBL025W                 | RRN10         |
| YPR036W                                          | VMA13         | YEL053C                 | MAK10         |
| YLR090W                                          | XDJ1          | YML071C                 | COG8          |
| YBL103C                                          | RTG3          | YOR043W                 | WHI2          |
| YDL020C                                          | RPN4          | YER116C                 | SLX8          |
| YOL051W                                          | GAL11         | YPL248C                 | GAL4          |
| YGL237C                                          | HAP2          | YDR289C                 | RTT103        |
| YER144C                                          | UBP5          | YNL238W                 | KEX2          |
| YNL291C                                          | MID1          | YNR032W                 | PPG1          |
| YOR080W                                          | DIA2          | YGL115W                 | SNF4          |
| YBL103C                                          | RTG3          | YEL053C                 | MAK10         |
| YBL021C                                          | HAP3          | YGL237C                 | HAP2          |
| YFR031C-A                                        | RPL2A         | YJL183W                 | MNN11         |
| YGL223C                                          | COG1          | YNR049C                 | MSO1          |
| YJL095W                                          | BCK1          | YAL002W                 | VPS8          |
| YPL042C                                          | SSN3          | YNL107W                 | YAF9          |
| YBR126C                                          | TPS1          | YNR072W                 | HXT17         |
| YLR441C                                          | RPS1A         | YOL121C                 | RPS19A        |
| YNL325C                                          | FIG4          | YPL137C                 | GIP3          |
| YMR224C                                          | MRE11         | YJR090C                 | GRR1          |
| YMR153W                                          | NUP53         | YOL111C                 | MDY2          |
| YMR224C                                          | MRE11         | YPL256C                 | CLN2          |
| YPL183C                                          | YPL183C       | YBR061C                 | TRM7          |
| YBL008W                                          | HIR1          | YDR363W-A               | SEM1          |
| YPL161C                                          | BEM4          | YGR188C                 | BUB1          |
| YPR120C                                          | CLB5          | YOR038C                 | HIR2          |

| Predictions at threshold level 0.75 continued... |               |                         |               |
|--------------------------------------------------|---------------|-------------------------|---------------|
| Gene1 of predicted pair                          |               | Gene2 of predicted pair |               |
| Systematic Name                                  | Standard Name | Systematic Name         | Standard Name |
| YPR018W                                          | RLF2          | YOL051W                 | GAL11         |
| YPL253C                                          | VIK1          | YLR399C                 | BDF1          |
| YDR225W                                          | HTA1          | YBR111W-A               | SUS1          |
| YGL178W                                          | MPT5          | YGR252W                 | GCN5          |
| YBR290W                                          | BSD2          | YPL246C                 | RBD2          |
| YDL223C                                          | HBT1          | YNR072W                 | HXT17         |
| YGL025C                                          | PGD1          | YNL058C                 | YNL058C       |
| YMR202W                                          | ERG2          | YGL003C                 | CDH1          |
| YEL043W                                          | YEL043W       | YNL107W                 | YAF9          |
| YJL176C                                          | SWI3          | YOR243C                 | PUS7          |
| YHR098C                                          | SFB3          | YGL054C                 | ERV14         |
| YMR116C                                          | ASC1          | YEL036C                 | ANP1          |
| YJL176C                                          | SWI3          | YDR385W                 | EFT2          |
| YEL053C                                          | MAK10         | YEL051W                 | VMA8          |
| YOR112W                                          | CEX1          | YCL001W                 | RER1          |
| YER114C                                          | BOI2          | YHR115C                 | DMA1          |
| YMR095C                                          | SNO1          | YKL048C                 | ELM1          |
| YJR063W                                          | RPA12         | YPR120C                 | CLB5          |
| YHR206W                                          | SKN7          | YOR208W                 | PTP2          |
| YOR127W                                          | RGA1          | YNL107W                 | YAF9          |
| YEL027W                                          | CUP5          | YEL051W                 | VMA8          |
| YOR337W                                          | TEA1          | YBL103C                 | RTG3          |
| YDR080W                                          | VPS41         | YLR093C                 | NYV1          |
| YBL047C                                          | EDE1          | YOL081W                 | IRA2          |
| YGL066W                                          | SGF73         | YKL048C                 | ELM1          |
| YFR032C-A                                        | RPL29         | YPL089C                 | RLM1          |
| YGR249W                                          | MGA1          | YIL033C                 | BCY1          |
| YGR105W                                          | VMA21         | YLR131C                 | ACE2          |
| YFR034C                                          | PHO4          | YNL289W                 | PCL1          |

| Predictions at threshold level 0.75 continued... |               |                         |               |
|--------------------------------------------------|---------------|-------------------------|---------------|
| Gene1 of predicted pair                          |               | Gene2 of predicted pair |               |
| Systematic Name                                  | Standard Name | Systematic Name         | Standard Name |
| YPL129W                                          | TAF14         | YNL236W                 | SIN4          |
| YMR164C                                          | MSS11         | YMR273C                 | ZDS1          |
| YML112W                                          | CTK3          | YAR014C                 | BUD14         |
| YFL013C                                          | IES1          | YCL037C                 | SRO9          |
| YDL185W                                          | TFP1          | YMR054W                 | STV1          |
| YGL100W                                          | SEH1          | YOR368W                 | RAD17         |
| YIL076W                                          | SEC28         | YDL077C                 | VAM6          |
| YDR076W                                          | RAD55         | YKL114C                 | APN1          |
| YPR131C                                          | NAT3          | YML102W                 | CAC2          |
| YDR293C                                          | SSD1          | YGR105W                 | VMA21         |
| YNL206C                                          | RTT106        | YKR048C                 | NAP1          |
| YGR188C                                          | BUB1          | YNL107W                 | YAF9          |
| YPL022W                                          | RAD1          | YLR370C                 | ARC18         |
| YMR199W                                          | CLN1          | YMR273C                 | ZDS1          |
| YBR030W                                          | YBR030W       | YML001W                 | YPT7          |
| YFR010W                                          | UBP6          | YCL037C                 | SRO9          |
| YDR477W                                          | SNF1          | YDL229W                 | SSB1          |
| YNR031C                                          | SSK2          | YPR119W                 | CLB2          |
| YNL087W                                          | TCB2          | YER162C                 | RAD4          |
| YGL175C                                          | SAE2          | YBR082C                 | UBC4          |
| YDR080W                                          | VPS41         | YJR060W                 | CBF1          |
| YMR016C                                          | SOK2          | YJL172W                 | CPS1          |
| YOR308C                                          | SNU66         | YML097C                 | VPS9          |
| YOR066W                                          | MSA1          | YBR280C                 | SAF1          |
| YMR224C                                          | MRE11         | YAL009W                 | SPO7          |
| YMR038C                                          | CCS1          | YKL114C                 | APN1          |
| YML103C                                          | NUP188        | YKL068W                 | NUP100        |
| YLR254C                                          | NDL1          | YOL081W                 | IRA2          |
| YBR009C                                          | HHF1          | YDR071C                 | PAA1          |

| Predictions at threshold level 0.75 continued... |               |                         |               |
|--------------------------------------------------|---------------|-------------------------|---------------|
| Gene1 of predicted pair                          |               | Gene2 of predicted pair |               |
| Systematic Name                                  | Standard Name | Systematic Name         | Standard Name |
| YLL039C                                          | UBI4          | YJL183W                 | MNN11         |
| YLR148W                                          | PEP3          | YML001W                 | YPT7          |
| YDL005C                                          | MED2          | YPL248C                 | GAL4          |
| YOR043W                                          | WHI2          | YLR452C                 | SST2          |
| YHR013C                                          | ARD1          | YJR135C                 | MCM22         |
| YGR104C                                          | SRB5          | YOR038C                 | HIR2          |
| YMR133W                                          | REC114        | YGL124C                 | MON1          |
| YAL024C                                          | LTE1          | YPL024W                 | RMI1          |
| YCR088W                                          | ABP1          | YGL095C                 | VPS45         |
| YGR270W                                          | YTA7          | YPL018W                 | CTF19         |
| YPL161C                                          | BEM4          | YBL101C                 | ECM21         |
| YDR293C                                          | SSD1          | YEL053C                 | MAK10         |
| YDR129C                                          | SAC6          | YPL050C                 | MNN9          |
| YNL016W                                          | PUB1          | YGL175C                 | SAE2          |
| YPL057C                                          | SUR1          | YDR335W                 | MSN5          |
| YFR030W                                          | MET10         | YOL054W                 | PSH1          |
| YER162C                                          | RAD4          | YCR053W                 | THR4          |
| YNL215W                                          | IES2          | YOR080W                 | DIA2          |
| YDR260C                                          | SWM1          | YHR200W                 | RPN10         |
| YER139C                                          | YER139C       | YGL124C                 | MON1          |
| YLR441C                                          | RPS1A         | YJL095W                 | BCK1          |
| YCL037C                                          | SRO9          | YOL108C                 | INO4          |
| YML115C                                          | VAN1          | YHR039C-A               | VMA10         |
| YOR069W                                          | VPS5          | YDR137W                 | RGP1          |
| YNL243W                                          | SLA2          | YLR332W                 | MID2          |
| YNL051W                                          | COG5          | YKR030W                 | GMH1          |
| YLR079W                                          | SIC1          | YGR270W                 | YTA7          |
| YOR106W                                          | VAM3          | YML028W                 | TSA1          |
| YMR153W                                          | NUP53         | YER040W                 | GLN3          |

| Predictions at threshold level 0.75 continued... |               |                         |               |
|--------------------------------------------------|---------------|-------------------------|---------------|
| Gene1 of predicted pair                          |               | Gene2 of predicted pair |               |
| Systematic Name                                  | Standard Name | Systematic Name         | Standard Name |
| YML115C                                          | VAN1          | YMR311C                 | GLC8          |
| YLR313C                                          | SPH1          | YGL031C                 | RPL24A        |
| YNL032W                                          | SIW14         | YDL223C                 | HBT1          |
| YOR023C                                          | AHC1          | YMR109W                 | MYO5          |
| YPL018W                                          | CTF19         | YHR115C                 | DMA1          |
| YDR110W                                          | FOB1          | YPR101W                 | SNT309        |
| YML013W                                          | UBX2          | YDR310C                 | SUM1          |
| YMR198W                                          | CIK1          | YKR001C                 | VPS1          |
| YOL121C                                          | RPS19A        | YLR370C                 | ARC18         |
| YDR484W                                          | VPS52         | YLR320W                 | MMS22         |
| YBR112C                                          | CYC8          | YGL035C                 | MIG1          |
| YBR228W                                          | SLX1          | YML028W                 | TSA1          |
| YOR127W                                          | RGA1          | YOR069W                 | VPS5          |
| YPR084W                                          | YPR084W       | YDL077C                 | VAM6          |
| YLR094C                                          | GIS3          | YNL041C                 | COG6          |
| YKR099W                                          | BAS1          | YPR046W                 | MCM16         |
| YLR079W                                          | SIC1          | YJR059W                 | PTK2          |
| YMR004W                                          | MVP1          | YML038C                 | YMD8          |
| YOR080W                                          | DIA2          | YMR179W                 | SPT21         |
| YDL013W                                          | SLX5          | YJR035W                 | RAD26         |
| YIR009W                                          | MSL1          | YGL031C                 | RPL24A        |
| YDR310C                                          | SUM1          | YLR182W                 | SWI6          |
| YDR484W                                          | VPS52         | YGL212W                 | VAM7          |
| YBR030W                                          | YBR030W       | YMR016C                 | SOK2          |
| YGR072W                                          | UPF3          | YPL105C                 | YPL105C       |
| YER143W                                          | DDI1          | YNR006W                 | VPS27         |
| YEL027W                                          | CUP5          | YGR105W                 | VMA21         |
| YJR040W                                          | GEF1          | YAL002W                 | VPS8          |
| YPL042C                                          | SSN3          | YOL145C                 | CTR9          |

| Predictions at threshold level 0.75 continued... |               |                         |               |
|--------------------------------------------------|---------------|-------------------------|---------------|
| Gene1 of predicted pair                          |               | Gene2 of predicted pair |               |
| Systematic Name                                  | Standard Name | Systematic Name         | Standard Name |
| YDR137W                                          | RGP1          | YLR131C                 | ACE2          |
| YHL031C                                          | GOS1          | YNR032W                 | PPG1          |
| YNL069C                                          | RPL16B        | YOR069W                 | VPS5          |
| YMR205C                                          | PFK2          | YBR041W                 | FAT1          |
| YLR083C                                          | EMP70         | YGR105W                 | VMA21         |
| YLL039C                                          | UBI4          | YPL248C                 | GAL4          |
| YHL020C                                          | OPI1          | YMR054W                 | STV1          |
| YLR386W                                          | VAC14         | YKR061W                 | KTR2          |
| YEL065W                                          | SIT1          | YKL116C                 | PRR1          |
| YGR081C                                          | SLX9          | YML102W                 | CAC2          |
| YDR443C                                          | SSN2          | YDR245W                 | MNN10         |
| YHR052W                                          | CIC1          | YER002W                 | NOP16         |
| YLR410W                                          | VIP1          | YGL175C                 | SAE2          |
| YML016C                                          | PPZ1          | YBR260C                 | RGD1          |
| YMR026C                                          | PEX12         | YOR035C                 | SHE4          |
| YBR274W                                          | CHK1          | YLR032W                 | RAD5          |
| YBR173C                                          | UMP1          | YOL121C                 | RPS19A        |
| YCR077C                                          | PAT1          | YPR046W                 | MCM16         |
| YFR031C-A                                        | RPL2A         | YNL076W                 | MKS1          |
| YEL053C                                          | MAK10         | YLR320W                 | MMS22         |
| YCL032W                                          | STE50         | YJR094C                 | IME1          |
| YEL065W                                          | SIT1          | YJL172W                 | CPS1          |
| YLR095C                                          | IOC2          | YLR370C                 | ARC18         |
| YLR083C                                          | EMP70         | YMR216C                 | SKY1          |
| YPL037C                                          | EGD1          | YHR039C-A               | VMA10         |
| YMR016C                                          | SOK2          | YDR310C                 | SUM1          |
| YOR043W                                          | WHI2          | YDL083C                 | RPS16B        |
| YBR173C                                          | UMP1          | YMR133W                 | REC114        |
| YMR055C                                          | BUB2          | YOL081W                 | IRA2          |



| Predictions at threshold level 0.75 continued... |               |                         |               |
|--------------------------------------------------|---------------|-------------------------|---------------|
| Gene1 of predicted pair                          |               | Gene2 of predicted pair |               |
| Systematic Name                                  | Standard Name | Systematic Name         | Standard Name |
| YHR200W                                          | RPN10         | YOR043W                 | WHI2          |
| YDR320C                                          | SWA2          | YOR109W                 | INP53         |
| YMR198W                                          | CIK1          | YOL091W                 | SPO21         |
| YIL053W                                          | RHR2          | YMR224C                 | MRE11         |
| YHR081W                                          | LRP1          | YDR310C                 | SUM1          |
| YHR156C                                          | LIN1          | YBR217W                 | ATG12         |
| YEL056W                                          | HAT2          | YDR310C                 | SUM1          |
| YKR020W                                          | VPS51         | YOL108C                 | INO4          |
| YDL223C                                          | HBT1          | YGR135W                 | PRE9          |
| YKR057W                                          | RPS21A        | YDR264C                 | AKR1          |
| YFL023W                                          | BUD27         | YLR370C                 | ARC18         |
| YKR001C                                          | VPS1          | YKL080W                 | VMA5          |
| YFR031C-A                                        | RPL2A         | YJR060W                 | CBF1          |
| YJR056C                                          | YJR056C       | YOL081W                 | IRA2          |
| YOR132W                                          | VPS17         | YDR080W                 | VPS41         |
| YDR108W                                          | GSG1          | YMR054W                 | STV1          |
| YPL022W                                          | RAD1          | YNL236W                 | SIN4          |
| YFR010W                                          | UBP6          | YDR137W                 | RGP1          |
| YNL201C                                          | PSY2          | YGL252C                 | RTG2          |
| YBR215W                                          | HPC2          | YJR060W                 | CBF1          |
| YLR216C                                          | CPR6          | YHR200W                 | RPN10         |
| YML001W                                          | YPT7          | YDR358W                 | GGA1          |
| YGL087C                                          | MMS2          | YMR055C                 | BUB2          |
| YJL176C                                          | SWI3          | YJL006C                 | CTK2          |
| YNL201C                                          | PSY2          | YAL024C                 | LTE1          |
| YMR068W                                          | AVO2          | YIL105C                 | SLM1          |
| YPR171W                                          | BSP1          | YDR310C                 | SUM1          |
| YFR040W                                          | SAP155        | YOR035C                 | SHE4          |
| YLL007C                                          | YLL007C       | YPL253C                 | VIK1          |

| Predictions at threshold level 0.75 continued... |               |                         |               |
|--------------------------------------------------|---------------|-------------------------|---------------|
| Gene1 of predicted pair                          |               | Gene2 of predicted pair |               |
| Systematic Name                                  | Standard Name | Systematic Name         | Standard Name |
| YOR290C                                          | SNF2          | YNL076W                 | MKS1          |
| YGR252W                                          | GCN5          | YPR120C                 | CLB5          |
| YJL036W                                          | SNX4          | YNL041C                 | COG6          |
| YPR017C                                          | DSS4          | YPL161C                 | BEM4          |
| YGL147C                                          | RPL9A         | YOR290C                 | SNF2          |
| YKR020W                                          | VPS51         | YFR036W                 | CDC26         |
| YOR039W                                          | CKB2          | YNL031C                 | HHT2          |
| YHR178W                                          | STB5          | YJR032W                 | CPR7          |
| YAL024C                                          | LTE1          | YCR053W                 | THR4          |
| YLR234W                                          | TOP3          | YHR114W                 | BZZ1          |
| YBL051C                                          | PIN4          | YPR051W                 | MAK3          |
| YPL057C                                          | SUR1          | YGL115W                 | SNF4          |
| YMR016C                                          | SOK2          | YER139C                 | YER139C       |
| YDR507C                                          | GIN4          | YPL161C                 | BEM4          |
| YPR018W                                          | RLF2          | YNL307C                 | MCK1          |
| YLR119W                                          | SRN2          | YCR053W                 | THR4          |
| YEL065W                                          | SIT1          | YGL147C                 | RPL9A         |
| YHR039C-A                                        | VMA10         | YDR358W                 | GGA1          |
| YIL103W                                          | DPH1          | YPL018W                 | CTF19         |
| YNL215W                                          | IES2          | YCR077C                 | PAT1          |
| YDR320C                                          | SWA2          | YEL053C                 | MAK10         |
| YDL047W                                          | SIT4          | YMR038C                 | CCS1          |
| YMR204C                                          | INP1          | YBR168W                 | PEX32         |
| YOR106W                                          | VAM3          | YPL195W                 | APL5          |
| YKR020W                                          | VPS51         | YEL036C                 | ANP1          |
| YLR234W                                          | TOP3          | YBR108W                 | YBR108W       |
| YKR035W-A                                        | DID2          | YHR200W                 | RPN10         |
| YKL006W                                          | RPL14A        | YKR020W                 | VPS51         |
| YNL218W                                          | MGS1          | YJL176C                 | SWI3          |

| Predictions at threshold level 0.75 continued... |               |                         |               |
|--------------------------------------------------|---------------|-------------------------|---------------|
| Gene1 of predicted pair                          |               | Gene2 of predicted pair |               |
| Systematic Name                                  | Standard Name | Systematic Name         | Standard Name |
| YNL087W                                          | TCB2          | YGL013C                 | PDR1          |
| YDL116W                                          | NUP84         | YMR179W                 | SPT21         |
| YIL036W                                          | CST6          | YLR381W                 | CTF3          |
| YML112W                                          | CTK3          | YLR182W                 | SWI6          |
| YOR290C                                          | SNF2          | YLR399C                 | BDF1          |
| YCR024C-A                                        | PMP1          | YPL178W                 | CBC2          |
| YNL201C                                          | PSY2          | YIR005W                 | IST3          |
| YBL021C                                          | HAP3          | YHR012W                 | VPS29         |
| YMR153W                                          | NUP53         | YJR056C                 | YJR056C       |
| YLR150W                                          | STM1          | YLR032W                 | RAD5          |
| YNR072W                                          | HXT17         | YDR207C                 | UME6          |
| YHR012W                                          | VPS29         | YNL238W                 | KEX2          |
| YNL238W                                          | KEX2          | YLR093C                 | NYV1          |
| YDR293C                                          | SSD1          | YDR289C                 | RTT103        |
| YEL009C                                          | GCN4          | YGL025C                 | PGD1          |
| YJR056C                                          | YJR056C       | YGL115W                 | SNF4          |
| YGL212W                                          | VAM7          | YGL252C                 | RTG2          |
| YLR452C                                          | SST2          | YMR052W                 | FAR3          |
| YCR097W                                          | HMRA1         | YCL067C                 | HMLALPHA2     |
| YBR200W                                          | BEM1          | YJR005W                 | APL1          |
| YHR200W                                          | RPN10         | YLR357W                 | RSC2          |
| YLR148W                                          | PEP3          | YOR106W                 | VAM3          |
| YOR195W                                          | SLK19         | YPL057C                 | SUR1          |
| YDR146C                                          | SWI5          | YOL081W                 | IRA2          |
| YDL135C                                          | RDI1          | YLR371W                 | ROM2          |
| YER116C                                          | SLX8          | YNL076W                 | MKS1          |
| YMR199W                                          | CLN1          | YJL157C                 | FAR1          |
| YBR108W                                          | YBR108W       | YNR072W                 | HXT17         |
| YDL184C                                          | RPL41A        | YMR016C                 | SOK2          |

| Predictions at threshold level 0.75 continued... |               |                         |               |
|--------------------------------------------------|---------------|-------------------------|---------------|
| Gene1 of predicted pair                          |               | Gene2 of predicted pair |               |
| Systematic Name                                  | Standard Name | Systematic Name         | Standard Name |
| YBR107C                                          | IML3          | YGR270W                 | YTA7          |
| YKR014C                                          | YPT52         | YML071C                 | COG8          |
| YOR033C                                          | EXO1          | YLR135W                 | SLX4          |
| YDL116W                                          | NUP84         | YKL110C                 | KTI12         |
| YMR199W                                          | CLN1          | YDL047W                 | SIT4          |
| YOR337W                                          | TEA1          | YDR207C                 | UME6          |
| YOR212W                                          | STE4          | YJR086W                 | STE18         |
| YGR252W                                          | GCN5          | YDR227W                 | SIR4          |
| YCR077C                                          | PAT1          | YOR368W                 | RAD17         |
| YGL087C                                          | MMS2          | YER110C                 | KAP123        |
| YDR383C                                          | NKP1          | YGL163C                 | RAD54         |
| YPL240C                                          | HSP82         | YNL086W                 | YNL086W       |
| YBR030W                                          | YBR030W       | YPL057C                 | SUR1          |
| YDL155W                                          | CLB3          | YLR425W                 | TUS1          |
| YBL058W                                          | SHP1          | YGL115W                 | SNF4          |
| YMR153W                                          | NUP53         | YER162C                 | RAD4          |
| YML115C                                          | VAN1          | YDR440W                 | DOT1          |
| YKR101W                                          | SIR1          | YFR036W                 | CDC26         |
| YML038C                                          | YMD8          | YAR014C                 | BUD14         |
| YGL147C                                          | RPL9A         | YMR311C                 | GLC8          |
| YGL066W                                          | SGF73         | YHR108W                 | GGA2          |
| YLR398C                                          | SKI2          | YDR207C                 | UME6          |
| YLR006C                                          | SSK1          | YNL293W                 | MSB3          |
| YNL087W                                          | TCB2          | YNL307C                 | MCK1          |
| YCR034W                                          | FEN1          | YBL008W                 | HIR1          |
| YBR239C                                          | YBR239C       | YHR016C                 | YSC84         |
| YPL256C                                          | CLN2          | YHR158C                 | KEL1          |
| YLR079W                                          | SIC1          | YHR152W                 | SPO12         |
| YDR156W                                          | RPA14         | YLR386W                 | VAC14         |

| Predictions at threshold level 0.75 continued... |               |                         |               |
|--------------------------------------------------|---------------|-------------------------|---------------|
| Gene1 of predicted pair                          |               | Gene2 of predicted pair |               |
| Systematic Name                                  | Standard Name | Systematic Name         | Standard Name |
| YBL103C                                          | RTG3          | YLR371W                 | ROM2          |
| YNL079C                                          | TPM1          | YGR135W                 | PRE9          |
| YGL078C                                          | DBP3          | YBR280C                 | SAF1          |
| YPL129W                                          | TAF14         | YIR009W                 | MSL1          |
| YLR090W                                          | XDJ1          | YGL115W                 | SNF4          |
| YGL135W                                          | RPL1B         | YDR137W                 | RGP1          |
| YDR137W                                          | RGP1          | YLR180W                 | SAM1          |
| YNL248C                                          | RPA49         | YNL307C                 | MCK1          |
| YLR337C                                          | VRP1          | YDR289C                 | RTT103        |
| YNL289W                                          | PCL1          | YKR048C                 | NAP1          |
| YDR004W                                          | RAD57         | YLR288C                 | MEC3          |
| YNL293W                                          | MSB3          | YNR049C                 | MSO1          |
| YIL036W                                          | CST6          | YPR120C                 | CLB5          |
| YMR199W                                          | CLN1          | YOR106W                 | VAM3          |
| YJR032W                                          | CPR7          | YGL003C                 | CDH1          |
| YGL174W                                          | BUD13         | YJL124C                 | LSM1          |
| YKR048C                                          | NAP1          | YGL124C                 | MON1          |
| YIL076W                                          | SEC28         | YGR270W                 | YTA7          |
| YHR134W                                          | WSS1          | YNL107W                 | YAF9          |
| YPL019C                                          | VTC3          | YER072W                 | VTC1          |
| YFR010W                                          | UBP6          | YOR368W                 | RAD17         |
| YKR057W                                          | RPS21A        | YIL008W                 | URM1          |
| YIL076W                                          | SEC28         | YDR335W                 | MSN5          |
| YDL020C                                          | RPN4          | YMR199W                 | CLN1          |
| YDR202C                                          | RAV2          | YKR030W                 | GMH1          |
| YJL004C                                          | SYS1          | YDR207C                 | UME6          |
| YGL212W                                          | VAM7          | YLR094C                 | GIS3          |
| YLR119W                                          | SRN2          | YMR016C                 | SOK2          |
| YDL116W                                          | NUP84         | YDR378C                 | LSM6          |

| Predictions at threshold level 0.75 continued... |               |                         |               |
|--------------------------------------------------|---------------|-------------------------|---------------|
| Gene1 of predicted pair                          |               | Gene2 of predicted pair |               |
| Systematic Name                                  | Standard Name | Systematic Name         | Standard Name |
| YKL025C                                          | PAN3          | YML058W                 | SML1          |
| YMR016C                                          | SOK2          | YPR030W                 | CSR2          |
| YPR131C                                          | NAT3          | YDL226C                 | GCS1          |
| YKL116C                                          | PRR1          | YMR153W                 | NUP53         |
| YBR057C                                          | MUM2          | YPL050C                 | MNN9          |
| YAL024C                                          | LTE1          | YDR293C                 | SSD1          |
| YOR270C                                          | VPH1          | YGL115W                 | SNF4          |
| YKL116C                                          | PRR1          | YOR043W                 | WHI2          |
| YBR009C                                          | HHF1          | YBR010W                 | HHT1          |
| YDR480W                                          | DIG2          | YDL159W                 | STE7          |
| YMR016C                                          | SOK2          | YNL041C                 | COG6          |
| YKL048C                                          | ELM1          | YLR320W                 | MMS22         |
| YDR108W                                          | GSG1          | YHL020C                 | OPI1          |
| YFR036W                                          | CDC26         | YDR310C                 | SUM1          |
| YPL180W                                          | TCO89         | YGL200C                 | EMP24         |
| YBR057C                                          | MUM2          | YNL307C                 | MCK1          |
| YDL184C                                          | RPL41A        | YEL053C                 | MAK10         |
| YGR133W                                          | PEX4          | YJL095W                 | BCK1          |
| YOR290C                                          | SNF2          | YLR441C                 | RPS1A         |
| YER162C                                          | RAD4          | YLR370C                 | ARC18         |
| YAL010C                                          | MDM10         | YOL081W                 | IRA2          |
| YBL051C                                          | PIN4          | YBL021C                 | HAP3          |
| YJL176C                                          | SWI3          | YKL109W                 | HAP4          |
| YAL020C                                          | ATS1          | YJL187C                 | SWE1          |
| YHL031C                                          | GOS1          | YER161C                 | SPT2          |
| YDR176W                                          | NGG1          | YOL051W                 | GAL11         |
| YDR174W                                          | HMO1          | YDR183W                 | PLP1          |
| YCR020C-A                                        | MAK31         | YDR108W                 | GSG1          |
| YGL087C                                          | MMS2          | YGL163C                 | RAD54         |

| Predictions at threshold level 0.75 continued... |               |                         |               |
|--------------------------------------------------|---------------|-------------------------|---------------|
| Gene1 of predicted pair                          |               | Gene2 of predicted pair |               |
| Systematic Name                                  | Standard Name | Systematic Name         | Standard Name |
| YGR249W                                          | MGA1          | YPR046W                 | MCM16         |
| YER044C                                          | ERG28         | YDR358W                 | GGA1          |
| YKL139W                                          | CTK1          | YJL124C                 | LSM1          |
| YNL288W                                          | CAF40         | YDL155W                 | CLB3          |
| YDR004W                                          | RAD57         | YPL018W                 | CTF19         |
| YGL190C                                          | CDC55         | YER027C                 | GAL83         |
| YDR443C                                          | SSN2          | YBR260C                 | RGD1          |
| YOR195W                                          | SLK19         | YPL106C                 | SSE1          |
| YLR148W                                          | PEP3          | YBR131W                 | CCZ1          |
| YGL066W                                          | SGF73         | YDL155W                 | CLB3          |
| YFR010W                                          | UBP6          | YEL013W                 | VAC8          |
| YHR200W                                          | RPN10         | YML001W                 | YPT7          |
| YFR030W                                          | MET10         | YIL103W                 | DPH1          |
| YMR004W                                          | MVP1          | YML001W                 | YPT7          |
| YKL139W                                          | CTK1          | YJL006C                 | CTK2          |
| YDR245W                                          | MNN10         | YPL256C                 | CLN2          |
| YGR100W                                          | MDR1          | YPR028W                 | YOP1          |
| YNL079C                                          | TPM1          | YOL081W                 | IRA2          |
| YMR243C                                          | ZRC1          | YPL058C                 | PDR12         |
| YPR084W                                          | YPR084W       | YAL002W                 | VPS8          |
| YGR133W                                          | PEX4          | YOR035C                 | SHE4          |
| YPR051W                                          | MAK3          | YGL253W                 | HXK2          |
| YJL006C                                          | CTK2          | YOL081W                 | IRA2          |
| YLR176C                                          | RFX1          | YLR399C                 | BDF1          |
| YJR032W                                          | CPR7          | YKL101W                 | HSL1          |
| YKR035W-A                                        | DID2          | YLR094C                 | GIS3          |
| YDR080W                                          | VPS41         | YAR014C                 | BUD14         |
| YOR132W                                          | VPS17         | YCR086W                 | CSM1          |
| YDR363W-A                                        | SEM1          | YNL107W                 | YAF9          |

| Predictions at threshold level 0.75 continued... |               |                         |               |
|--------------------------------------------------|---------------|-------------------------|---------------|
| Gene1 of predicted pair                          |               | Gene2 of predicted pair |               |
| Systematic Name                                  | Standard Name | Systematic Name         | Standard Name |
| YGR072W                                          | UPF3          | YNL291C                 | MID1          |
| YDL184C                                          | RPL41A        | YMR230W                 | RPS10B        |
| YDR379W                                          | RGA2          | YNL229C                 | URE2          |
| YJR024C                                          | MDE1          | YKL068W                 | NUP100        |
| YPL024W                                          | RMI1          | YGL025C                 | PGD1          |
| YHR013C                                          | ARD1          | YBR082C                 | UBC4          |
| YJR032W                                          | CPR7          | YER139C                 | YER139C       |
| YHR156C                                          | LIN1          | YJR056C                 | YJR056C       |
| YDR146C                                          | SWI5          | YGR089W                 | NNF2          |
| YDR202C                                          | RAV2          | YNL051W                 | COG5          |
| YPL240C                                          | HSP82         | YGR294W                 | PAU12         |
| YNL135C                                          | FPR1          | YHR012W                 | VPS29         |
| YIR005W                                          | IST3          | YHR167W                 | THP2          |
| YDL184C                                          | RPL41A        | YER139C                 | YER139C       |
| YGR249W                                          | MGA1          | YMR142C                 | RPL13B        |
| YCL037C                                          | SRO9          | YHR167W                 | THP2          |
| YNL289W                                          | PCL1          | YJL095W                 | BCK1          |
| YNL025C                                          | SSN8          | YDR440W                 | DOT1          |
| YFL013C                                          | IES1          | YKL139W                 | CTK1          |
| YDR439W                                          | LRS4          | YDR335W                 | MSN5          |
| YJL204C                                          | RCY1          | YAL030W                 | SNC1          |
| YAL024C                                          | LTE1          | YHR115C                 | DMA1          |
| YPL161C                                          | BEM4          | YCR077C                 | PAT1          |
| YGL115W                                          | SNF4          | YNL041C                 | COG6          |
| YPL024W                                          | RMI1          | YMR224C                 | MRE11         |
| YMR198W                                          | CIK1          | YJR135C                 | MCM22         |
| YBL071W-A                                        | KTI11         | YHR187W                 | IKI1          |
| YDR440W                                          | DOT1          | YOR141C                 | ARP8          |
| YEL044W                                          | IES6          | YBL047C                 | EDE1          |



| Predictions at threshold level 0.75 continued... |               |                         |               |
|--------------------------------------------------|---------------|-------------------------|---------------|
| Gene1 of predicted pair                          |               | Gene2 of predicted pair |               |
| Systematic Name                                  | Standard Name | Systematic Name         | Standard Name |
| YHL031C                                          | GOS1          | YJL124C                 | LSM1          |
| YDR174W                                          | HMO1          | YGL252C                 | RTG2          |
| YHR060W                                          | VMA22         | YGR105W                 | VMA21         |
| YNL068C                                          | FKH2          | YPL161C                 | BEM4          |
| YFR010W                                          | UBP6          | YKR099W                 | BAS1          |
| YFR031C-A                                        | RPL2A         | YOR066W                 | MSA1          |
| YBR200W                                          | BEM1          | YPL256C                 | CLN2          |
| YMR153W                                          | NUP53         | YDR207C                 | UME6          |
| YMR199W                                          | CLN1          | YPL178W                 | CBC2          |
| YBR200W                                          | BEM1          | YFL023W                 | BUD27         |
| YPL037C                                          | EGD1          | YER040W                 | GLN3          |
| YLR150W                                          | STM1          | YKL101W                 | HSL1          |
| YBR173C                                          | UMP1          | YOR327C                 | SNC2          |
| YBR065C                                          | ECM2          | YPL213W                 | LEA1          |
| YAL024C                                          | LTE1          | YMR133W                 | REC114        |
| YBR107C                                          | IML3          | YDR144C                 | MKC7          |
| YLR090W                                          | XDJ1          | YNR072W                 | HXT17         |
| YBR289W                                          | SNF5          | YNL030W                 | HHF2          |
| YDL065C                                          | PEX19         | YGR209C                 | TRX2          |
| YJL117W                                          | PHO86         | YDL006W                 | PTC1          |
| YMR224C                                          | MRE11         | YOL081W                 | IRA2          |
| YLL039C                                          | UBI4          | YDL161W                 | ENT1          |
| YNL127W                                          | FAR11         | YAR014C                 | BUD14         |
| YDL083C                                          | RPS16B        | YPR046W                 | MCM16         |
| YNL054W                                          | VAC7          | YIL103W                 | DPH1          |
| YJL154C                                          | VPS35         | YMR127C                 | SAS2          |
| YOR358W                                          | HAP5          | YBR114W                 | RAD16         |
| YKR020W                                          | VPS51         | YLR396C                 | VPS33         |
| YGL033W                                          | HOP2          | YKR035W-A               | DID2          |

| Predictions at threshold level 0.75 continued... |               |                         |               |
|--------------------------------------------------|---------------|-------------------------|---------------|
| Gene1 of predicted pair                          |               | Gene2 of predicted pair |               |
| Systematic Name                                  | Standard Name | Systematic Name         | Standard Name |
| YPL024W                                          | RMI1          | YMR016C                 | SOK2          |
| YPL178W                                          | CBC2          | YBL079W                 | NUP170        |
| YDR293C                                          | SSD1          | YLR182W                 | SWI6          |
| YML058W                                          | SML1          | YLR234W                 | TOP3          |
| YLL007C                                          | YLL007C       | YDR144C                 | MKC7          |
| YMR224C                                          | MRE11         | YOR270C                 | VPH1          |
| YGL078C                                          | DBP3          | YKL116C                 | PRR1          |
| YPR046W                                          | MCM16         | YDL192W                 | ARF1          |
| YLR079W                                          | SIC1          | YML095C                 | RAD10         |
| YER096W                                          | SHC1          | YGL031C                 | RPL24A        |
| YML117W                                          | NAB6          | YBR200W                 | BEM1          |
| YJL095W                                          | BCK1          | YOL067C                 | RTG1          |
| YLR006C                                          | SSK1          | YMR052W                 | FAR3          |
| YER144C                                          | UBP5          | YOR066W                 | MSA1          |
| YDR477W                                          | SNF1          | YLR093C                 | NYV1          |
| YFR010W                                          | UBP6          | YMR230W                 | RPS10B        |
| YMR224C                                          | MRE11         | YDR137W                 | RGP1          |
| YNL248C                                          | RPA49         | YGL252C                 | RTG2          |
| YDL160C                                          | DHH1          | YMR224C                 | MRE11         |
| YMR224C                                          | MRE11         | YPL161C                 | BEM4          |
| YOL067C                                          | RTG1          | YHR114W                 | BZZ1          |
| YDR195W                                          | REF2          | YOR179C                 | SYC1          |
| YNR023W                                          | SNF12         | YPL240C                 | HSP82         |
| YER139C                                          | YER139C       | YDR310C                 | SUM1          |
| YIL148W                                          | RPL40A        | YGR059W                 | SPR3          |
| YNL297C                                          | MON2          | YJR084W                 | CSN12         |
| YBR217W                                          | ATG12         | YOR270C                 | VPH1          |
| YKL139W                                          | CTK1          | YAR014C                 | BUD14         |
| YDR129C                                          | SAC6          | YPL161C                 | BEM4          |

| Predictions at threshold level 0.75 continued... |               |                         |               |
|--------------------------------------------------|---------------|-------------------------|---------------|
| Gene1 of predicted pair                          |               | Gene2 of predicted pair |               |
| Systematic Name                                  | Standard Name | Systematic Name         | Standard Name |
| YBL058W                                          | SHP1          | YNL076W                 | MKS1          |
| YIL036W                                          | CST6          | YHR111W                 | UBA4          |
| YIL008W                                          | URM1          | YBL087C                 | RPL23A        |
| YMR179W                                          | SPT21         | YDR254W                 | CHL4          |
| YLR234W                                          | TOP3          | YLR032W                 | RAD5          |
| YNL032W                                          | SIW14         | YML071C                 | COG8          |
| YOL090W                                          | MSH2          | YGR258C                 | RAD2          |
| YOR106W                                          | VAM3          | YMR216C                 | SKY1          |
| YDL020C                                          | RPN4          | YGR108W                 | CLB1          |
| YDR156W                                          | RPA14         | YFR032C-A               | RPL29         |
| YHR200W                                          | RPN10         | YGR232W                 | NAS6          |
| YKL010C                                          | UFD4          | YJL176C                 | SWI3          |
| YOR112W                                          | CEX1          | YAL002W                 | VPS8          |
| YHL031C                                          | GOS1          | YNL199C                 | GCR2          |
| YPL115C                                          | BEM3          | YHR111W                 | UBA4          |
| YIL036W                                          | CST6          | YML097C                 | VPS9          |
| YHR111W                                          | UBA4          | YPR120C                 | CLB5          |
| YOR308C                                          | SNU66         | YNL107W                 | YAF9          |
| YBR274W                                          | CHK1          | YOR043W                 | WHI2          |
| YMR139W                                          | RIM11         | YMR042W                 | ARG80         |
| YOR358W                                          | HAP5          | YGL016W                 | KAP122        |
| YDL160C                                          | DHH1          | YNL145W                 | MFA2          |
| YPL213W                                          | LEA1          | YNL079C                 | TPM1          |
| YIL036W                                          | CST6          | YFR030W                 | MET10         |
| YJL036W                                          | SNX4          | YGR105W                 | VMA21         |
| YER139C                                          | YER139C       | YDR207C                 | UME6          |
| YMR284W                                          | YKU70         | YDR227W                 | SIR4          |
| YLR381W                                          | CTF3          | YPL161C                 | BEM4          |
| YOL148C                                          | SPT20         | YDR216W                 | ADR1          |

| Predictions at threshold level 0.75 continued... |               |                         |               |
|--------------------------------------------------|---------------|-------------------------|---------------|
| Gene1 of predicted pair                          |               | Gene2 of predicted pair |               |
| Systematic Name                                  | Standard Name | Systematic Name         | Standard Name |
| YPR120C                                          | CLB5          | YNL225C                 | CNM67         |
| YNR023W                                          | SNF12         | YGL025C                 | PGD1          |
| YDR174W                                          | HMO1          | YML016C                 | PPZ1          |
| YDR146C                                          | SWI5          | YMR055C                 | BUB2          |
| YPR017C                                          | DSS4          | YCR066W                 | RAD18         |
| YKR099W                                          | BAS1          | YGL115W                 | SNF4          |
| YNL069C                                          | RPL16B        | YHL020C                 | OPI1          |
| YEL065W                                          | SIT1          | YFR010W                 | UBP6          |
| YNL297C                                          | MON2          | YPL037C                 | EGD1          |
| YGR129W                                          | SYF2          | YPR101W                 | SNT309        |
| YPL057C                                          | SUR1          | YER044C                 | ERG28         |
| YAL024C                                          | LTE1          | YOL081W                 | IRA2          |
| YJL183W                                          | MNN11         | YEL060C                 | PRB1          |
| YDR261C                                          | EXG2          | YDL077C                 | VAM6          |
| YMR039C                                          | SUB1          | YDR310C                 | SUM1          |
| YOR112W                                          | CEX1          | YNL238W                 | KEX2          |
| YGL105W                                          | ARC1          | YPR119W                 | CLB2          |
| YDL020C                                          | RPN4          | YEL053C                 | MAK10         |
| YKL126W                                          | YPK1          | YOL081W                 | IRA2          |
| YKR099W                                          | BAS1          | YEL053C                 | MAK10         |
| YDR108W                                          | GSG1          | YDR137W                 | RGP1          |
| YDL161W                                          | ENT1          | YMR231W                 | PEP5          |
| YGR249W                                          | MGA1          | YHR156C                 | LIN1          |
| YJL058C                                          | BIT61         | YJR135C                 | MCM22         |
| YGR249W                                          | MGA1          | YLR370C                 | ARC18         |
| YLR119W                                          | SRN2          | YLR452C                 | SST2          |
| YLR090W                                          | XDJ1          | YNL238W                 | KEX2          |
| YPR018W                                          | RLF2          | YPR120C                 | CLB5          |
| YFR010W                                          | UBP6          | YMR055C                 | BUB2          |

| Predictions at threshold level 0.75 continued... |               |                         |               |
|--------------------------------------------------|---------------|-------------------------|---------------|
| Gene1 of predicted pair                          |               | Gene2 of predicted pair |               |
| Systematic Name                                  | Standard Name | Systematic Name         | Standard Name |
| YMR199W                                          | CLN1          | YER049W                 | TPA1          |
| YOR069W                                          | VPS5          | YHR060W                 | VMA22         |
| YGL175C                                          | SAE2          | YLR352W                 | YLR352W       |
| YML117W                                          | NAB6          | YOR275C                 | RIM20         |
| YNL218W                                          | MGS1          | YHR134W                 | WSS1          |
| YBL051C                                          | PIN4          | YNL116W                 | DMA2          |
| YDR320C                                          | SWA2          | YGL212W                 | VAM7          |
| YPL129W                                          | TAF14         | YOR001W                 | RRP6          |
| YDR176W                                          | NGG1          | YNL107W                 | YAF9          |
| YLR410W                                          | VIP1          | YDR289C                 | RTT103        |
| YJR135C                                          | MCM22         | YHL002W                 | HSE1          |
| YNL201C                                          | PSY2          | YFR036W                 | CDC26         |
| YGR104C                                          | SRB5          | YER049W                 | TPA1          |
| YGR270W                                          | YTA7          | YPR120C                 | CLB5          |
| YMR092C                                          | AIP1          | YDR129C                 | SAC6          |
| YCL037C                                          | SRO9          | YCR066W                 | RAD18         |
| YDR477W                                          | SNF1          | YNR072W                 | HXT17         |
| YGL025C                                          | PGD1          | YLR370C                 | ARC18         |
| YNL025C                                          | SSN8          | YCR081W                 | SRB8          |
| YDR318W                                          | MCM21         | YDR289C                 | RTT103        |
| YBL058W                                          | SHP1          | YLR370C                 | ARC18         |
| YLR135W                                          | SLX4          | YOR080W                 | DIA2          |
| YJL004C                                          | SYS1          | YNL107W                 | YAF9          |
| YGL133W                                          | ITC1          | YDR507C                 | GIN4          |
| YDR108W                                          | GSG1          | YHR060W                 | VMA22         |
| YIL159W                                          | BNR1          | YJL172W                 | CPS1          |
| YDL013W                                          | SLX5          | YCR086W                 | CSM1          |
| YKR099W                                          | BAS1          | YBR280C                 | SAF1          |
| YJL060W                                          | BNA3          | YBR215W                 | HPC2          |

| Predictions at threshold level 0.75 continued... |               |                         |               |
|--------------------------------------------------|---------------|-------------------------|---------------|
| Gene1 of predicted pair                          |               | Gene2 of predicted pair |               |
| Systematic Name                                  | Standard Name | Systematic Name         | Standard Name |
| YGR054W                                          | YGR054W       | YJR090C                 | GRR1          |
| YML115C                                          | VAN1          | YML012W                 | ERV25         |
| YOL018C                                          | TLG2          | YDR153C                 | ENT5          |
| YPR084W                                          | YPR084W       | YGL212W                 | VAM7          |
| YBR171W                                          | SEC66         | YBL025W                 | RRN10         |
| YLR234W                                          | TOP3          | YNL117W                 | MLS1          |
| YJL124C                                          | LSM1          | YML112W                 | CTK3          |
| YLL007C                                          | YLL007C       | YJR135C                 | MCM22         |
| YHR060W                                          | VMA22         | YBL025W                 | RRN10         |
| YBR171W                                          | SEC66         | YEL036C                 | ANP1          |
| YGL115W                                          | SNF4          | YBR280C                 | SAF1          |
| YLR292C                                          | SEC72         | YEL053C                 | MAK10         |
| YGL060W                                          | YBP2          | YBR107C                 | IML3          |
| YLR381W                                          | CTF3          | YLR032W                 | RAD5          |
| YKR014C                                          | YPT52         | YOR035C                 | SHE4          |
| YPL256C                                          | CLN2          | YHR115C                 | DMA1          |
| YLR386W                                          | VAC14         | YPL161C                 | BEM4          |
| YML115C                                          | VAN1          | YJR084W                 | CSN12         |
| YNL016W                                          | PUB1          | YJR035W                 | RAD26         |
| YGL147C                                          | RPL9A         | YER116C                 | SLX8          |
| YKL213C                                          | DOA1          | YMR038C                 | CCS1          |
| YOR132W                                          | VPS17         | YNR032W                 | PPG1          |
| YGR249W                                          | MGA1          | YLR094C                 | GIS3          |
| YIR005W                                          | IST3          | YFR036W                 | CDC26         |
| YPR040W                                          | TIP41         | YPL152W                 | RRD2          |
| YNL215W                                          | IES2          | YHR039C-A               | VMA10         |
| YLR399C                                          | BDF1          | YKL110C                 | KTI12         |
| YMR080C                                          | NAM7          | YOR076C                 | SKI7          |
| YOR127W                                          | RGA1          | YOR275C                 | RIM20         |

| Predictions at threshold level 0.75 continued... |               |                         |               |
|--------------------------------------------------|---------------|-------------------------|---------------|
| Gene1 of predicted pair                          |               | Gene2 of predicted pair |               |
| Systematic Name                                  | Standard Name | Systematic Name         | Standard Name |
| YDL047W                                          | SIT4          | YKR030W                 | GMH1          |
| YHR013C                                          | ARD1          | YMR038C                 | CCS1          |
| YBL079W                                          | NUP170        | YML057W                 | CMP2          |
| YDR383C                                          | NKP1          | YLR254C                 | NDL1          |
| YER087C-B                                        | SBH1          | YDL006W                 | PTC1          |
| YIL076W                                          | SEC28         | YNL307C                 | MCK1          |
| YDL083C                                          | RPS16B        | YDL077C                 | VAM6          |
| YKR099W                                          | BAS1          | YBR036C                 | CSG2          |
| YGL226C-A                                        | OST5          | YEL036C                 | ANP1          |
| YDR260C                                          | SWM1          | YPL152W                 | RRD2          |
| YDR443C                                          | SSN2          | YOR270C                 | VPH1          |
| YAL024C                                          | LTE1          | YMR039C                 | SUB1          |
| YGL025C                                          | PGD1          | YNL079C                 | TPM1          |
| YLL007C                                          | YLL007C       | YGL124C                 | MON1          |
| YJR024C                                          | MDE1          | YGL016W                 | KAP122        |
| YBR126C                                          | TPS1          | YOR035C                 | SHE4          |
| YHR012W                                          | VPS29         | YOR327C                 | SNC2          |
| YGR104C                                          | SRB5          | YDR378C                 | LSM6          |
| YDL116W                                          | NUP84         | YHR013C                 | ARD1          |
| YLR381W                                          | CTF3          | YDR363W-A               | SEM1          |
| YGL147C                                          | RPL9A         | YOR270C                 | VPH1          |
| YEL053C                                          | MAK10         | YLR370C                 | ARC18         |
| YKR072C                                          | SIS2          | YGL031C                 | RPL24A        |
| YDR254W                                          | CHL4          | YPL152W                 | RRD2          |
| YLR095C                                          | IOC2          | YHR060W                 | VMA22         |
| YMR172W                                          | HOT1          | YCR086W                 | CSM1          |
| YHR205W                                          | SCH9          | YER096W                 | SHC1          |
| YHR157W                                          | REC104        | YMR133W                 | REC114        |
| YDR174W                                          | HMO1          | YOL054W                 | PSH1          |

| Predictions at threshold level 0.75 continued... |               |                         |               |
|--------------------------------------------------|---------------|-------------------------|---------------|
| Gene1 of predicted pair                          |               | Gene2 of predicted pair |               |
| Systematic Name                                  | Standard Name | Systematic Name         | Standard Name |
| YOR312C                                          | RPL20B        | YKL041W                 | VPS24         |
| YNL264C                                          | PDR17         | YJR035W                 | RAD26         |
| YHR134W                                          | WSS1          | YDR254W                 | CHL4          |
| YMR055C                                          | BUB2          | YDL006W                 | PTC1          |
| YJL154C                                          | VPS35         | YKL119C                 | VPH2          |
| YDR293C                                          | SSD1          | YLR360W                 | VPS38         |
| YNL215W                                          | IES2          | YDL002C                 | NHP10         |
| YOR109W                                          | INP53         | YJR058C                 | APS2          |
| YER110C                                          | KAP123        | YKR024C                 | DBP7          |
| YML016C                                          | PPZ1          | YDR200C                 | VPS64         |
| YPR131C                                          | NAT3          | YLR018C                 | POM34         |
| YDR507C                                          | GIN4          | YCL024W                 | KCC4          |
| YKL048C                                          | ELM1          | YGL124C                 | MON1          |
| YOR337W                                          | TEA1          | YNL058C                 | YNL058C       |
| YOR141C                                          | ARP8          | YOL081W                 | IRA2          |
| YOR368W                                          | RAD17         | YGR188C                 | BUB1          |
| YHR013C                                          | ARD1          | YJL006C                 | CTK2          |
| YPL022W                                          | RAD1          | YDR207C                 | UME6          |
| YPL046C                                          | ELC1          | YGL208W                 | SIP2          |
| YGR249W                                          | MGA1          | YNL041C                 | COG6          |
| YOR109W                                          | INP53         | YER120W                 | SCS2          |
| YLR192C                                          | HCR1          | YBR171W                 | SEC66         |
| YJL151C                                          | SNA3          | YLR144C                 | ACF2          |
| YER179W                                          | DMC1          | YLR219W                 | MSC3          |
| YPR120C                                          | CLB5          | YDR207C                 | UME6          |
| YLR206W                                          | ENT2          | YNR006W                 | VPS27         |
| YMR311C                                          | GLC8          | YEL060C                 | PRB1          |
| YLR094C                                          | GIS3          | YMR311C                 | GLC8          |
| YBL051C                                          | PIN4          | YNL107W                 | YAF9          |



| Predictions at threshold level 0.75 continued... |               |                         |               |
|--------------------------------------------------|---------------|-------------------------|---------------|
| Gene1 of predicted pair                          |               | Gene2 of predicted pair |               |
| Systematic Name                                  | Standard Name | Systematic Name         | Standard Name |
| YHR178W                                          | STB5          | YBR215W                 | HPC2          |
| YJR040W                                          | GEF1          | YPR032W                 | SRO7          |
| YDL192W                                          | ARF1          | YBR280C                 | SAF1          |
| YBR057C                                          | MUM2          | YMR116C                 | ASC1          |
| YLR240W                                          | VPS34         | YGL095C                 | VPS45         |
| YGL163C                                          | RAD54         | YLR370C                 | ARC18         |
| YPL024W                                          | RMI1          | YMR038C                 | CCS1          |
| YNL069C                                          | RPL16B        | YER122C                 | GLO3          |
| YPR036W                                          | VMA13         | YOR066W                 | MSA1          |
| YKR048C                                          | NAP1          | YJL187C                 | SWE1          |
| YLR093C                                          | NYV1          | YEL060C                 | PRB1          |
| YPR018W                                          | RLF2          | YPL256C                 | CLN2          |
| YDR245W                                          | MNN10         | YDR137W                 | RGP1          |
| YKL116C                                          | PRR1          | YDR207C                 | UME6          |
| YHR178W                                          | STB5          | YCR077C                 | PAT1          |
| YGL147C                                          | RPL9A         | YMR214W                 | SCJ1          |
| YHR108W                                          | GGA2          | YDR153C                 | ENT5          |
| YJR084W                                          | CSN12         | YLR180W                 | SAM1          |
| YHL006C                                          | SHU1          | YDR078C                 | SHU2          |
| YJL053W                                          | PEP8          | YOL018C                 | TLG2          |
| YGL212W                                          | VAM7          | YEL036C                 | ANP1          |
| YMR116C                                          | ASC1          | YDR440W                 | DOT1          |
| YLR292C                                          | SEC72         | YGR108W                 | CLB1          |
| YGR108W                                          | CLB1          | YHR111W                 | UBA4          |
| YLR079W                                          | SIC1          | YMR125W                 | STO1          |
| YNL248C                                          | RPA49         | YHR013C                 | ARD1          |
| YLR090W                                          | XDJ1          | YLR180W                 | SAM1          |
| YDR309C                                          | GIC2          | YPL256C                 | CLN2          |
| YGL163C                                          | RAD54         | YKL114C                 | APN1          |

| Predictions at threshold level 0.75 continued... |               |                         |               |
|--------------------------------------------------|---------------|-------------------------|---------------|
| Gene1 of predicted pair                          |               | Gene2 of predicted pair |               |
| Systematic Name                                  | Standard Name | Systematic Name         | Standard Name |
| YMR125W                                          | STO1          | YKL068W                 | NUP100        |
| YPR084W                                          | YPR084W       | YEL043W                 | YEL043W       |
| YDR293C                                          | SSD1          | YMR216C                 | SKY1          |
| YLR234W                                          | TOP3          | YPR046W                 | MCM16         |
| YDR137W                                          | RGP1          | YJL095W                 | BCK1          |
| YBR217W                                          | ATG12         | YOR035C                 | SHE4          |
| YNL093W                                          | YPT53         | YGL198W                 | YIP4          |
| YDL080C                                          | THI3          | YML097C                 | VPS9          |
| YLR006C                                          | SSK1          | YIL034C                 | CAP2          |
| YBR278W                                          | DPB3          | YDL002C                 | NHP10         |
| YLR292C                                          | SEC72         | YGL237C                 | HAP2          |
| YGR014W                                          | MSB2          | YDL006W                 | PTC1          |
| YDR004W                                          | RAD57         | YBR215W                 | HPC2          |
| YJL124C                                          | LSM1          | YPL152W                 | RRD2          |
| YFR040W                                          | SAP155        | YJR032W                 | CPR7          |
| YOR124C                                          | UBP2          | YLR350W                 | ORM2          |
| YLR384C                                          | IKI3          | YHR187W                 | IKI1          |
| YML115C                                          | VAN1          | YMR133W                 | REC114        |
| YDL065C                                          | PEX19         | YLR309C                 | IMH1          |
| YDR293C                                          | SSD1          | YOR069W                 | VPS5          |
| YDR293C                                          | SSD1          | YDR309C                 | GIC2          |
| YFR010W                                          | UBP6          | YGR135W                 | PRE9          |
| YKL116C                                          | PRR1          | YBR019C                 | GAL10         |
| YPL253C                                          | VIK1          | YPR046W                 | MCM16         |
| YOR127W                                          | RGA1          | YHL031C                 | GOS1          |
| YBR030W                                          | YBR030W       | YLR386W                 | VAC14         |
| YKR099W                                          | BAS1          | YDR310C                 | SUM1          |
| YGL147C                                          | RPL9A         | YDL184C                 | RPL41A        |
| YOL051W                                          | GAL11         | YLR399C                 | BDF1          |

| Predictions at threshold level 0.75 continued... |               |                         |               |
|--------------------------------------------------|---------------|-------------------------|---------------|
| Gene1 of predicted pair                          |               | Gene2 of predicted pair |               |
| Systematic Name                                  | Standard Name | Systematic Name         | Standard Name |
| YPL152W                                          | RRD2          | YIL103W                 | DPH1          |
| YOR109W                                          | INP53         | YOL018C                 | TLG2          |
| YML115C                                          | VAN1          | YCR053W                 | THR4          |
| YDL154W                                          | MSH5          | YGL249W                 | ZIP2          |
| YFL033C                                          | RIM15         | YDR310C                 | SUM1          |
| YLR079W                                          | SIC1          | YER110C                 | KAP123        |
| YOR195W                                          | SLK19         | YKL101W                 | HSL1          |
| YPL042C                                          | SSN3          | YHR115C                 | DMA1          |
| YGR159C                                          | NSR1          | YDR440W                 | DOT1          |
| YLR360W                                          | VPS38         | YMR054W                 | STV1          |
| YDL223C                                          | HBT1          | YJR032W                 | CPR7          |
| YPL115C                                          | BEM3          | YJL183W                 | MNN11         |
| YNL069C                                          | RPL16B        | YDR310C                 | SUM1          |
| YDR245W                                          | MNN10         | YHR012W                 | VPS29         |
| YDR080W                                          | VPS41         | YNL297C                 | MON2          |
| YIL034C                                          | CAP2          | YBR200W                 | BEM1          |
| YEL065W                                          | SIT1          | YER040W                 | GLN3          |
| YLR360W                                          | VPS38         | YBR127C                 | VMA2          |
| YML095C                                          | RAD10         | YDL059C                 | RAD59         |
| YMR153W                                          | NUP53         | YCR053W                 | THR4          |
| YKR020W                                          | VPS51         | YEL043W                 | YEL043W       |
| YJL154C                                          | VPS35         | YJR135C                 | MCM22         |
| YHR013C                                          | ARD1          | YNL107W                 | YAF9          |
| YBL103C                                          | RTG3          | YPR119W                 | CLB2          |
| YNL025C                                          | SSN8          | YCL037C                 | SRO9          |
| YLR337C                                          | VRP1          | YML071C                 | COG8          |
| YPL106C                                          | SSE1          | YLR370C                 | ARC18         |
| YNL307C                                          | MCK1          | YGL100W                 | SEH1          |
| YKL048C                                          | ELM1          | YJL006C                 | CTK2          |

| Predictions at threshold level 0.75 continued... |               |                         |               |
|--------------------------------------------------|---------------|-------------------------|---------------|
| Gene1 of predicted pair                          |               | Gene2 of predicted pair |               |
| Systematic Name                                  | Standard Name | Systematic Name         | Standard Name |
| YHL031C                                          | GOS1          | YDR378C                 | LSM6          |
| YJL095W                                          | BCK1          | YBL072C                 | RPS8A         |
| YNL291C                                          | MID1          | YHL031C                 | GOS1          |
| YLR102C                                          | APC9          | YKL032C                 | IXR1          |
| YJR056C                                          | YJR056C       | YDR310C                 | SUM1          |
| YMR201C                                          | RAD14         | YGR258C                 | RAD2          |
| YPL024W                                          | RMI1          | YJR140C                 | HIR3          |
| YBR217W                                          | ATG12         | YMR133W                 | REC114        |
| YPL129W                                          | TAF14         | YBR111W-A               | SUS1          |
| YEL065W                                          | SIT1          | YOR327C                 | SNC2          |
| YLR288C                                          | MEC3          | YER032W                 | FIR1          |
| YMR224C                                          | MRE11         | YKL006W                 | RPL14A        |
| YKL126W                                          | YPK1          | YDR358W                 | GGA1          |
| YDR440W                                          | DOT1          | YHL002W                 | HSE1          |
| YEL043W                                          | YEL043W       | YER120W                 | SCS2          |
| YBR107C                                          | IML3          | YLR452C                 | SST2          |
| YML016C                                          | PPZ1          | YDR318W                 | MCM21         |
| YHR060W                                          | VMA22         | YOL081W                 | IRA2          |
| YOR358W                                          | HAP5          | YHR111W                 | UBA4          |
| YDR129C                                          | SAC6          | YKL041W                 | VPS24         |
| YDR379W                                          | RGA2          | YDL047W                 | SIT4          |
| YMR026C                                          | PEX12         | YHR039C-A               | VMA10         |
| YLR148W                                          | PEP3          | YGL198W                 | YIP4          |
| YDR507C                                          | GIN4          | YJL136C                 | RPS21B        |
| YIR005W                                          | IST3          | YOR038C                 | HIR2          |
| YGL033W                                          | HOP2          | YGL212W                 | VAM7          |
| YOR132W                                          | VPS17         | YDL006W                 | PTC1          |
| YDR076W                                          | RAD55         | YLR352W                 | YLR352W       |
| YOR127W                                          | RGA1          | YBR108W                 | YBR108W       |

| Predictions at threshold level 0.75 continued... |               |                         |               |
|--------------------------------------------------|---------------|-------------------------|---------------|
| Gene1 of predicted pair                          |               | Gene2 of predicted pair |               |
| Systematic Name                                  | Standard Name | Systematic Name         | Standard Name |
| YIL036W                                          | CST6          | YML112W                 | CTK3          |
| YJR040W                                          | GEF1          | YGR105W                 | VMA21         |
| YOL054W                                          | PSH1          | YGL252C                 | RTG2          |
| YJL176C                                          | SWI3          | YOR035C                 | SHE4          |
| YOR132W                                          | VPS17         | YDR289C                 | RTT103        |
| YPR018W                                          | RLF2          | YBR195C                 | MSI1          |
| YLR216C                                          | CPR6          | YNL135C                 | FPR1          |
| YOR033C                                          | EXO1          | YPR120C                 | CLB5          |
| YLR309C                                          | IMH1          | YDR153C                 | ENT5          |
| YDR225W                                          | HTA1          | YMR055C                 | BUB2          |
| YGL190C                                          | CDC55         | YPR135W                 | CTF4          |
| YBR200W                                          | BEM1          | YHR060W                 | VMA22         |
| YOR059C                                          | YOR059C       | YMR313C                 | TGL3          |
| YNL201C                                          | PSY2          | YIL103W                 | DPH1          |
| YCR081W                                          | SRB8          | YLR079W                 | SIC1          |
| YOR290C                                          | SNF2          | YMR152W                 | YIM1          |
| YKR020W                                          | VPS51         | YHL020C                 | OPI1          |
| YMR152W                                          | YIM1          | YMR230W                 | RPS10B        |
| YCR066W                                          | RAD18         | YPL234C                 | TFP3          |
| YPR084W                                          | YPR084W       | YOL018C                 | TLG2          |
| YLR320W                                          | MMS22         | YMR230W                 | RPS10B        |
| YMR133W                                          | REC114        | YMR152W                 | YIM1          |
| YOR270C                                          | VPH1          | YNR072W                 | HXT17         |
| YKR020W                                          | VPS51         | YEL053C                 | MAK10         |
| YMR109W                                          | MYO5          | YGR054W                 | YGR054W       |
| YOR195W                                          | SLK19         | YPL152W                 | RRD2          |
| YDL184C                                          | RPL41A        | YKL126W                 | YPK1          |
| YNL236W                                          | SIN4          | YHR108W                 | GGA2          |
| YHR134W                                          | WSS1          | YJL187C                 | SWE1          |

| Predictions at threshold level 0.75 continued... |               |                         |               |
|--------------------------------------------------|---------------|-------------------------|---------------|
| Gene1 of predicted pair                          |               | Gene2 of predicted pair |               |
| Systematic Name                                  | Standard Name | Systematic Name         | Standard Name |
| YHR178W                                          | STB5          | YGL148W                 | ARO2          |
| YOR043W                                          | WHI2          | YNL041C                 | COG6          |
| YDR245W                                          | MNN10         | YJR035W                 | RAD26         |
| YOR001W                                          | RRP6          | YHL031C                 | GOS1          |
| YKL139W                                          | CTK1          | YLR410W                 | VIP1          |
| YGL208W                                          | SIP2          | YPL256C                 | CLN2          |
| YOR270C                                          | VPH1          | YPR030W                 | CSR2          |
| YBR107C                                          | IML3          | YDL226C                 | GCS1          |
| YBL008W                                          | HIR1          | YGL115W                 | SNF4          |
| YLR234W                                          | TOP3          | YBL079W                 | NUP170        |
| YNR072W                                          | HXT17         | YOL121C                 | RPS19A        |
| YOR080W                                          | DIA2          | YER122C                 | GLO3          |
| YJL172W                                          | CPS1          | YHR081W                 | LRP1          |
| YFR008W                                          | FAR7          | YMR029C                 | FAR8          |
| YMR039C                                          | SUB1          | YDL002C                 | NHP10         |
| YKR001C                                          | VPS1          | YEL053C                 | MAK10         |
| YBL087C                                          | RPL23A        | YGL031C                 | RPL24A        |
| YNL054W                                          | VAC7          | YGL252C                 | RTG2          |
| YIR005W                                          | IST3          | YLR182W                 | SWI6          |
| YLR083C                                          | EMP70         | YNR032W                 | PPG1          |
| YEL044W                                          | IES6          | YDR245W                 | MNN10         |
| YGL078C                                          | DBP3          | YBR171W                 | SEC66         |
| YDR443C                                          | SSN2          | YNL288W                 | CAF40         |
| YBR084C-A                                        | RPL19A        | YHR200W                 | RPN10         |
| YGR019W                                          | UGA1          | YLR360W                 | VPS38         |
| YFR031C-A                                        | RPL2A         | YOR035C                 | SHE4          |
| YJL183W                                          | MNN11         | YCR053W                 | THR4          |
| YNL264C                                          | PDR17         | YJL183W                 | MNN11         |
| YNL025C                                          | SSN8          | YDR137W                 | RGP1          |

| Predictions at threshold level 0.75 continued... |               |                         |               |
|--------------------------------------------------|---------------|-------------------------|---------------|
| Gene1 of predicted pair                          |               | Gene2 of predicted pair |               |
| Systematic Name                                  | Standard Name | Systematic Name         | Standard Name |
| YBR107C                                          | IML3          | YMR055C                 | BUB2          |
| YLR410W                                          | VIP1          | YJL006C                 | CTK2          |
| YAL020C                                          | ATS1          | YBR200W                 | BEM1          |
| YJR140C                                          | HIR3          | YOR124C                 | UBP2          |
| YBR019C                                          | GAL10         | YGL124C                 | MON1          |
| YDR245W                                          | MNN10         | YJL187C                 | SWE1          |
| YBR173C                                          | UMP1          | YGR184C                 | UBR1          |
| YOL030W                                          | GAS5          | YMR038C                 | CCS1          |
| YNL079C                                          | TPM1          | YHR158C                 | KEL1          |
| YGL178W                                          | MPT5          | YMR312W                 | ELP6          |
| YMR133W                                          | REC114        | YBR036C                 | CSG2          |
| YGR072W                                          | UPF3          | YHR060W                 | VMA22         |
| YDL101C                                          | DUN1          | YHR134W                 | WSS1          |
| YKL117W                                          | SBA1          | YKR024C                 | DBP7          |
| YIL053W                                          | RHR2          | YDL184C                 | RPL41A        |
| YPL129W                                          | TAF14         | YGL252C                 | RTG2          |
| YDR108W                                          | GSG1          | YNL044W                 | YIP3          |
| YPL161C                                          | BEM4          | YNL076W                 | MKS1          |
| YMR142C                                          | RPL13B        | YBR171W                 | SEC66         |
| YDR358W                                          | GGA1          | YER040W                 | GLN3          |
| YMR179W                                          | SPT21         | YKL101W                 | HSL1          |
| YLR018C                                          | POM34         | YOR358W                 | HAP5          |
| YDL184C                                          | RPL41A        | YBR280C                 | SAF1          |
| YCL027W                                          | FUS1          | YMR032W                 | HOF1          |
| YNL243W                                          | SLA2          | YPR135W                 | CTF4          |
| YDR293C                                          | SSD1          | YPR051W                 | MAK3          |
| YOR231W                                          | MKK1          | YDL006W                 | PTC1          |
| YML115C                                          | VAN1          | YDR456W                 | NHX1          |
| YMR038C                                          | CCS1          | YDR207C                 | UME6          |

| Predictions at threshold level 0.75 continued... |               |                         |               |
|--------------------------------------------------|---------------|-------------------------|---------------|
| Gene1 of predicted pair                          |               | Gene2 of predicted pair |               |
| Systematic Name                                  | Standard Name | Systematic Name         | Standard Name |
| YLR360W                                          | VPS38         | YGR020C                 | VMA7          |
| YPL037C                                          | EGD1          | YML001W                 | YPT7          |
| YOR312C                                          | RPL20B        | YJR035W                 | RAD26         |
| YER044C                                          | ERG28         | YOR066W                 | MSA1          |
| YPL137C                                          | GIP3          | YJR032W                 | CPR7          |
| YBR280C                                          | SAF1          | YOL081W                 | IRA2          |
| YMR198W                                          | CIK1          | YLR386W                 | VAC14         |
| YMR198W                                          | CIK1          | YKL032C                 | IXR1          |
| YOR106W                                          | VAM3          | YDL192W                 | ARF1          |
| YPR017C                                          | DSS4          | YOL112W                 | MSB4          |
| YJL095W                                          | BCK1          | YER040W                 | GLN3          |
| YBR082C                                          | UBC4          | YDR207C                 | UME6          |
| YJL029C                                          | VPS53         | YJL164C                 | TPK1          |
| YEL065W                                          | SIT1          | YDR207C                 | UME6          |
| YJR032W                                          | CPR7          | YEL042W                 | GDA1          |
| YLR447C                                          | VMA6          | YOL018C                 | TLG2          |
| YMR038C                                          | CCS1          | YLR032W                 | RAD5          |
| YPL024W                                          | RMI1          | YMR133W                 | REC114        |
| YLL039C                                          | UBI4          | YJR099W                 | YUH1          |
| YHR111W                                          | UBA4          | YDR309C                 | GIC2          |
| YML115C                                          | VAN1          | YBL103C                 | RTG3          |
| YJL154C                                          | VPS35         | YOR106W                 | VAM3          |
| YBR107C                                          | IML3          | YJR060W                 | CBF1          |
| YBR127C                                          | VMA2          | YGR105W                 | VMA21         |
| YLR288C                                          | MEC3          | YMR038C                 | CCS1          |
| YPR084W                                          | YPR084W       | YDR363W-A               | SEM1          |
| YHR111W                                          | UBA4          | YKL101W                 | HSL1          |
| YLL007C                                          | YLL007C       | YBR171W                 | SEC66         |
| YIL008W                                          | URM1          | YGR188C                 | BUB1          |



| Predictions at threshold level 0.75 continued... |               |                         |               |
|--------------------------------------------------|---------------|-------------------------|---------------|
| Gene1 of predicted pair                          |               | Gene2 of predicted pair |               |
| Systematic Name                                  | Standard Name | Systematic Name         | Standard Name |
| YPR046W                                          | MCM16         | YGL124C                 | MON1          |
| YML103C                                          | NUP188        | YGL252C                 | RTG2          |
| YDR103W                                          | STE5          | YLR362W                 | STE11         |
| YMR192W                                          | GYL1          | YPL249C                 | GYP5          |
| YOR132W                                          | VPS17         | YDR484W                 | VPS52         |
| YMR172W                                          | HOT1          | YOR023C                 | AHC1          |
| YGR105W                                          | VMA21         | YNL107W                 | YAF9          |
| YKL126W                                          | YPK1          | YML071C                 | COG8          |
| YFR010W                                          | UBP6          | YGL100W                 | SEH1          |
| YPL018W                                          | CTF19         | YBR114W                 | RAD16         |
| YLR447C                                          | VMA6          | YER122C                 | GLO3          |
| YDL116W                                          | NUP84         | YOR023C                 | AHC1          |
| YJL058C                                          | BIT61         | YPR046W                 | MCM16         |
| YDR507C                                          | GIN4          | YHR111W                 | UBA4          |
| YMR116C                                          | ASC1          | YJL006C                 | CTK2          |
| YBR200W                                          | BEM1          | YLR447C                 | VMA6          |
| YFR010W                                          | UBP6          | YNL325C                 | FIG4          |
| YDR507C                                          | GIN4          | YCL032W                 | STE50         |
| YML016C                                          | PPZ1          | YPL253C                 | VIK1          |
| YHR081W                                          | LRP1          | YOL081W                 | IRA2          |
| YEL065W                                          | SIT1          | YLR320W                 | MMS22         |
| YDR477W                                          | SNF1          | YOR035C                 | SHE4          |
| YJR035W                                          | RAD26         | YLR182W                 | SWI6          |
| YGL178W                                          | MPT5          | YDR334W                 | SWR1          |
| YPL057C                                          | SUR1          | YER161C                 | SPT2          |
| YLR095C                                          | IOC2          | YJR056C                 | YJR056C       |
| YDL006W                                          | PTC1          | YML097C                 | VPS9          |
| YDR155C                                          | CPR1          | YLR233C                 | EST1          |
| YDR254W                                          | CHL4          | YAL002W                 | VPS8          |

| Predictions at threshold level 0.75 continued... |               |                         |               |
|--------------------------------------------------|---------------|-------------------------|---------------|
| Gene1 of predicted pair                          |               | Gene2 of predicted pair |               |
| Systematic Name                                  | Standard Name | Systematic Name         | Standard Name |
| YBR010W                                          | HHT1          | YOR141C                 | ARP8          |
| YGL033W                                          | HOP2          | YIL076W                 | SEC28         |
| YPL042C                                          | SSN3          | YMR202W                 | ERG2          |
| YFR010W                                          | UBP6          | YJR032W                 | CPR7          |
| YBL058W                                          | SHP1          | YGL212W                 | VAM7          |
| YGL115W                                          | SNF4          | YJR060W                 | CBF1          |
| YPL024W                                          | RMI1          | YBL103C                 | RTG3          |
| YGR054W                                          | YGR054W       | YDR289C                 | RTT103        |
| YNL238W                                          | KEX2          | YBR280C                 | SAF1          |
| YHR012W                                          | VPS29         | YER049W                 | TPA1          |
| YKL116C                                          | PRR1          | YNL238W                 | KEX2          |
| YMR172W                                          | HOT1          | YMR127C                 | SAS2          |
| YGL190C                                          | CDC55         | YKL113C                 | RAD27         |
| YDR335W                                          | MSN5          | YGR270W                 | YTA7          |
| YAL024C                                          | LTE1          | YBR195C                 | MSI1          |
| YLR386W                                          | VAC14         | YDR469W                 | SDC1          |
| YOR132W                                          | VPS17         | YDL192W                 | ARF1          |
| YHR111W                                          | UBA4          | YLR254C                 | NDL1          |
| YER044C                                          | ERG28         | YPL161C                 | BEM4          |
| YEL050C                                          | RML2          | YPL018W                 | CTF19         |
| YJL124C                                          | LSM1          | YER139C                 | YER139C       |
| YPL057C                                          | SUR1          | YMR214W                 | SCJ1          |
| YML115C                                          | VAN1          | YBR036C                 | CSG2          |
| YLR234W                                          | TOP3          | YML115C                 | VAN1          |
| YER144C                                          | UBP5          | YNL307C                 | MCK1          |
| YJL172W                                          | CPS1          | YLR093C                 | NYV1          |
| YBR194W                                          | SOY1          | YJR135C                 | MCM22         |
| YML109W                                          | ZDS2          | YER124C                 | DSE1          |
| YGL163C                                          | RAD54         | YFR036W                 | CDC26         |

| Predictions at threshold level 0.75 continued... |               |                         |               |
|--------------------------------------------------|---------------|-------------------------|---------------|
| Gene1 of predicted pair                          |               | Gene2 of predicted pair |               |
| Systematic Name                                  | Standard Name | Systematic Name         | Standard Name |
| YKR014C                                          | YPT52         | YBR181C                 | RPS6B         |
| YFR031C-A                                        | RPL2A         | YCL037C                 | SRO9          |
| YMR026C                                          | PEX12         | YFR036W                 | CDC26         |
| YML115C                                          | VAN1          | YKR001C                 | VPS1          |
| YMR095C                                          | SNO1          | YGL033W                 | HOP2          |
| YBL058W                                          | SHP1          | YER040W                 | GLN3          |
| YGR249W                                          | MGA1          | YPL161C                 | BEM4          |
| YGL051W                                          | MST27         | YAR033W                 | MST28         |
| YOR132W                                          | VPS17         | YMR216C                 | SKY1          |
| YCL037C                                          | SRO9          | YOL018C                 | TLG2          |
| YLR370C                                          | ARC18         | YER122C                 | GLO3          |
| YEL009C                                          | GCN4          | YBR010W                 | HHT1          |
| YHR134W                                          | WSS1          | YGL237C                 | HAP2          |
| YHR200W                                          | RPN10         | YKR030W                 | GMH1          |
| YNL032W                                          | SIW14         | YPL161C                 | BEM4          |
| YML109W                                          | ZDS2          | YCR077C                 | PAT1          |
| YNL058C                                          | YNL058C       | YJL183W                 | MNN11         |
| YFR032C-A                                        | RPL29         | YMR205C                 | PFK2          |
| YGR252W                                          | GCN5          | YDR216W                 | ADR1          |
| YBR215W                                          | HPC2          | YGL175C                 | SAE2          |
| YGR241C                                          | YAP1802       | YNL238W                 | KEX2          |
| YLR292C                                          | SEC72         | YLR233C                 | EST1          |
| YPL129W                                          | TAF14         | YGR275W                 | RTT102        |
| YDR477W                                          | SNF1          | YNL076W                 | MKS1          |
| YJL117W                                          | PHO86         | YJL183W                 | MNN11         |
| YDL083C                                          | RPS16B        | YER040W                 | GLN3          |
| YDR379W                                          | RGA2          | YNL116W                 | DMA2          |
| YGL212W                                          | VAM7          | YDL077C                 | VAM6          |
| YNL139C                                          | RLR1          | YER063W                 | THO1          |

| Predictions at threshold level 0.75 continued... |               |                         |               |
|--------------------------------------------------|---------------|-------------------------|---------------|
| Gene1 of predicted pair                          |               | Gene2 of predicted pair |               |
| Systematic Name                                  | Standard Name | Systematic Name         | Standard Name |
| YHR060W                                          | VMA22         | YGL054C                 | ERV14         |
| YHR012W                                          | VPS29         | YJR135C                 | MCM22         |
| YDR496C                                          | PUF6          | YOL041C                 | NOP12         |
| YOR033C                                          | EXO1          | YMR055C                 | BUB2          |
| YGL003C                                          | CDH1          | YBR019C                 | GAL10         |
| YMR152W                                          | YIM1          | YBR280C                 | SAF1          |
| YDR439W                                          | LRS4          | YGL252C                 | RTG2          |
| YJL176C                                          | SWI3          | YBR009C                 | HHF1          |
| YBR084C-A                                        | RPL19A        | YPL256C                 | CLN2          |
| YNL106C                                          | INP52         | YGL212W                 | VAM7          |
| YGR252W                                          | GCN5          | YDR440W                 | DOT1          |
| YCL001W                                          | RER1          | YNL127W                 | FAR11         |
| YHR039C-A                                        | VMA10         | YNL041C                 | COG6          |
| YFL023W                                          | BUD27         | YKR035W-A               | DID2          |
| YML115C                                          | VAN1          | YNL307C                 | MCK1          |
| YMR199W                                          | CLN1          | YKL101W                 | HSL1          |
| YER001W                                          | MNN1          | YML071C                 | COG8          |
| YGR249W                                          | MGA1          | YLR398C                 | SKI2          |
| YFL033C                                          | RIM15         | YHL020C                 | OPI1          |
| YML109W                                          | ZDS2          | YOR043W                 | WHI2          |
| YPR084W                                          | YPR084W       | YAR014C                 | BUD14         |
| YBL008W                                          | HIR1          | YJL124C                 | LSM1          |
| YNR072W                                          | HXT17         | YNL076W                 | MKS1          |
| YMR198W                                          | CIK1          | YLR032W                 | RAD5          |
| YOR290C                                          | SNF2          | YPR046W                 | MCM16         |
| YDL184C                                          | RPL41A        | YER144C                 | UBP5          |
| YHR013C                                          | ARD1          | YLR032W                 | RAD5          |
| YJR058C                                          | APS2          | YOR327C                 | SNC2          |
| YMR230W                                          | RPS10B        | YOL081W                 | IRA2          |

| Predictions at threshold level 0.75 continued... |               |                         |               |
|--------------------------------------------------|---------------|-------------------------|---------------|
| Gene1 of predicted pair                          |               | Gene2 of predicted pair |               |
| Systematic Name                                  | Standard Name | Systematic Name         | Standard Name |
| YGR108W                                          | CLB1          | YIL008W                 | URM1          |
| YFR040W                                          | SAP155        | YPL234C                 | TFP3          |
| YHL031C                                          | GOS1          | YMR054W                 | STV1          |
| YGR019W                                          | UGA1          | YGR054W                 | YGR054W       |
| YNL206C                                          | RTT106        | YHR115C                 | DMA1          |
| YBR107C                                          | IML3          | YJR090C                 | GRR1          |
| YPR051W                                          | MAK3          | YJR090C                 | GRR1          |
| YDR103W                                          | STE5          | YDL159W                 | STE7          |
| YLR182W                                          | SWI6          | YNL225C                 | CNM67         |
| YNR052C                                          | POP2          | YER116C                 | SLX8          |
| YHR039C-A                                        | VMA10         | YER122C                 | GLO3          |
| YLR090W                                          | XDJ1          | YBR200W                 | BEM1          |
| YOL090W                                          | MSH2          | YJR035W                 | RAD26         |
| YIL159W                                          | BNR1          | YML115C                 | VAN1          |
| YOR069W                                          | VPS5          | YPL120W                 | VPS30         |
| YAL014C                                          | SYN8          | YHL031C                 | GOS1          |
| YKL048C                                          | ELM1          | YHR200W                 | RPN10         |
| YEL053C                                          | MAK10         | YJR135C                 | MCM22         |
| YGL212W                                          | VAM7          | YMR133W                 | REC114        |
| YJL060W                                          | BNA3          | YPR046W                 | MCM16         |
| YMR039C                                          | SUB1          | YCR077C                 | PAT1          |
| YBR171W                                          | SEC66         | YHL002W                 | HSE1          |
| YKL048C                                          | ELM1          | YJL190C                 | RPS22A        |
| YKL032C                                          | IXR1          | YBL101C                 | ECM21         |
| YMR224C                                          | MRE11         | YBR107C                 | IML3          |
| YML112W                                          | CTK3          | YNL225C                 | CNM67         |
| YKR057W                                          | RPS21A        | YNL116W                 | DMA2          |
| YKR061W                                          | KTR2          | YLR399C                 | BDF1          |
| YBR073W                                          | RDH54         | YBR107C                 | IML3          |

| Predictions at threshold level 0.75 continued... |               |                         |               |
|--------------------------------------------------|---------------|-------------------------|---------------|
| Gene1 of predicted pair                          |               | Gene2 of predicted pair |               |
| Systematic Name                                  | Standard Name | Systematic Name         | Standard Name |
| YPL019C                                          | VTC3          | YOR270C                 | VPH1          |
| YOR066W                                          | MSA1          | YOR327C                 | SNC2          |
| YBR200W                                          | BEM1          | YBL025W                 | RRN10         |
| YDR004W                                          | RAD57         | YEL056W                 | HAT2          |
| YJR010C-A                                        | SPC1          | YDL006W                 | PTC1          |
| YLR083C                                          | EMP70         | YOL108C                 | INO4          |
| YHL031C                                          | GOS1          | YOL108C                 | INO4          |
| YBR133C                                          | HSL7          | YKL101W                 | HSL1          |
| YGR108W                                          | CLB1          | YGL003C                 | CDH1          |
| YCL037C                                          | SRO9          | YKL160W                 | ELF1          |
| YIR005W                                          | IST3          | YNL225C                 | CNM67         |
| YNL106C                                          | INP52         | YPL152W                 | RRD2          |
| YJL176C                                          | SWI3          | YHL025W                 | SNF6          |
| YOR035C                                          | SHE4          | YDL192W                 | ARF1          |
| YMR055C                                          | BUB2          | YDR254W                 | CHL4          |
| YDR108W                                          | GSG1          | YDR310C                 | SUM1          |
| YGL066W                                          | SGF73         | YDR216W                 | ADR1          |
| YPL240C                                          | HSP82         | YJR136C                 | YJR136C       |
| YDR443C                                          | SSN2          | YNL236W                 | SIN4          |
| YGR184C                                          | UBR1          | YNL230C                 | ELA1          |
| YKL213C                                          | DOA1          | YAL002W                 | VPS8          |
| YDR378C                                          | LSM6          | YBL101C                 | ECM21         |
| YDR477W                                          | SNF1          | YDR310C                 | SUM1          |
| YMR004W                                          | MVP1          | YPL120W                 | VPS30         |
| YNL094W                                          | APP1          | YOR284W                 | HUA2          |
| YLR362W                                          | STE11         | YLR452C                 | SST2          |
| YPL158C                                          | YPL158C       | YOL081W                 | IRA2          |
| YDR192C                                          | NUP42         | YHR052W                 | CIC1          |
| YGR072W                                          | UPF3          | YHR039C-A               | VMA10         |

| Predictions at threshold level 0.75 continued... |               |                         |               |
|--------------------------------------------------|---------------|-------------------------|---------------|
| Gene1 of predicted pair                          |               | Gene2 of predicted pair |               |
| Systematic Name                                  | Standard Name | Systematic Name         | Standard Name |
| YLR386W                                          | VAC14         | YHR152W                 | SPO12         |
| YLR315W                                          | NKP2          | YAR014C                 | BUD14         |
| YIL008W                                          | URM1          | YHR114W                 | BZZ1          |
| YNL041C                                          | COG6          | YNL051W                 | COG5          |
| YOR327C                                          | SNC2          | YDR153C                 | ENT5          |
| YHR060W                                          | VMA22         | YDR261C                 | EXG2          |
| YKL025C                                          | PAN3          | YGL087C                 | MMS2          |
| YGR268C                                          | HUA1          | YLR144C                 | ACF2          |
| YIL053W                                          | RHR2          | YER040W                 | GLN3          |
| YPR036W                                          | VMA13         | YBR019C                 | GAL10         |
| YLR192C                                          | HCR1          | YKR035W-A               | DID2          |
| YER116C                                          | SLX8          | YGL212W                 | VAM7          |
| YER116C                                          | SLX8          | YDL083C                 | RPS16B        |
| YPL161C                                          | BEM4          | YJR033C                 | RAV1          |
| YDR484W                                          | VPS52         | YGL003C                 | CDH1          |
| YHR012W                                          | VPS29         | YGL124C                 | MON1          |
| YKL126W                                          | YPK1          | YPL137C                 | GIP3          |
| YHR152W                                          | SPO12         | YKR048C                 | NAP1          |
| YCR002C                                          | CDC10         | YNL078W                 | NIS1          |
| YFL013C                                          | IES1          | YDR363W-A               | SEM1          |
| YDR358W                                          | GGA1          | YER139C                 | YER139C       |
| YPL137C                                          | GIP3          | YJL095W                 | BCK1          |
| YIL076W                                          | SEC28         | YJL095W                 | BCK1          |
| YDR293C                                          | SSD1          | YPR072W                 | NOT5          |
| YNL206C                                          | RTT106        | YML028W                 | TSA1          |
| YNL288W                                          | CAF40         | YLR381W                 | CTF3          |
| YCL067C                                          | HMLALPHA2     | YMR042W                 | ARG80         |
| YJR060W                                          | CBF1          | YHR039C-A               | VMA10         |
| YFR030W                                          | MET10         | YAR014C                 | BUD14         |

| Predictions at threshold level 0.75 continued... |               |                         |               |
|--------------------------------------------------|---------------|-------------------------|---------------|
| Gene1 of predicted pair                          |               | Gene2 of predicted pair |               |
| Systematic Name                                  | Standard Name | Systematic Name         | Standard Name |
| YHR134W                                          | WSS1          | YBR171W                 | SEC66         |
| YGL115W                                          | SNF4          | YEL043W                 | YEL043W       |
| YNL032W                                          | SIW14         | YBR171W                 | SEC66         |
| YDR484W                                          | VPS52         | YEL060C                 | PRB1          |
| YOR076C                                          | SKI7          | YDR083W                 | RRP8          |
| YNL229C                                          | URE2          | YBL087C                 | RPL23A        |
| YHR060W                                          | VMA22         | YDL077C                 | VAM6          |
| YIL076W                                          | SEC28         | YKL160W                 | ELF1          |
| YDR477W                                          | SNF1          | YFR036W                 | CDC26         |
| YOL030W                                          | GAS5          | YNL016W                 | PUB1          |
| YHR200W                                          | RPN10         | YML028W                 | TSA1          |
| YNL288W                                          | CAF40         | YEL056W                 | HAT2          |
| YGL212W                                          | VAM7          | YOR036W                 | PEP12         |
| YIL036W                                          | CST6          | YGR188C                 | BUB1          |
| YDR156W                                          | RPA14         | YML062C                 | MFT1          |
| YKL139W                                          | CTK1          | YDR183W                 | PLP1          |
| YJL058C                                          | BIT61         | YPL018W                 | CTF19         |
| YDR225W                                          | HTA1          | YBR133C                 | HSL7          |
| YJR040W                                          | GEF1          | YOL018C                 | TLG2          |
| YPR131C                                          | NAT3          | YMR231W                 | PEP5          |
| YBR200W                                          | BEM1          | YNL289W                 | PCL1          |
| YLR192C                                          | HCR1          | YER116C                 | SLX8          |
| YJR056C                                          | YJR056C       | YOR035C                 | SHE4          |
| YDL184C                                          | RPL41A        | YPL161C                 | BEM4          |
| YML115C                                          | VAN1          | YHR205W                 | SCH9          |
| YBR111W-A                                        | SUS1          | YNL031C                 | HHT2          |
| YOR270C                                          | VPH1          | YER072W                 | VTC1          |
| YIL076W                                          | SEC28         | YNL325C                 | FIG4          |
| YFR021W                                          | ATG18         | YER162C                 | RAD4          |



| Predictions at threshold level 0.75 continued... |               |                         |               |
|--------------------------------------------------|---------------|-------------------------|---------------|
| Gene1 of predicted pair                          |               | Gene2 of predicted pair |               |
| Systematic Name                                  | Standard Name | Systematic Name         | Standard Name |
| YDR293C                                          | SSD1          | YJR090C                 | GRR1          |
| YNL087W                                          | TCB2          | YKR099W                 | BAS1          |
| YGR105W                                          | VMA21         | YNR032W                 | PPG1          |
| YOL111C                                          | MDY2          | YEL060C                 | PRB1          |
| YDR443C                                          | SSN2          | YDR137W                 | RGP1          |
| YDR078C                                          | SHU2          | YLR376C                 | PSY3          |
| YGL212W                                          | VAM7          | YAR014C                 | BUD14         |
| YHR156C                                          | LIN1          | YDL083C                 | RPS16B        |
| YDR477W                                          | SNF1          | YMR142C                 | RPL13B        |
| YLR119W                                          | SRN2          | YDL192W                 | ARF1          |
| YDR443C                                          | SSN2          | YGR104C                 | SRB5          |
| YPL129W                                          | TAF14         | YDR146C                 | SWI5          |
| YFR010W                                          | UBP6          | YOR080W                 | DIA2          |
| YDL020C                                          | RPN4          | YLR233C                 | EST1          |
| YOR270C                                          | VPH1          | YDR207C                 | UME6          |
| YOR127W                                          | RGA1          | YGR270W                 | YTA7          |
| YPR036W                                          | VMA13         | YKL101W                 | HSL1          |
| YMR039C                                          | SUB1          | YJL006C                 | CTK2          |
| YDL002C                                          | NHP10         | YML097C                 | VPS9          |
| YJL172W                                          | CPS1          | YOL121C                 | RPS19A        |
| YBL103C                                          | RTG3          | YKL048C                 | ELM1          |
| YLR396C                                          | VPS33         | YOR036W                 | PEP12         |
| YOR069W                                          | VPS5          | YLR447C                 | VMA6          |
| YDR477W                                          | SNF1          | YPL253C                 | VIK1          |
| YGL115W                                          | SNF4          | YOR066W                 | MSA1          |
| YDR310C                                          | SUM1          | YOL081W                 | IRA2          |
| YDL116W                                          | NUP84         | YNL054W                 | VAC7          |
| YOR112W                                          | CEX1          | YGL212W                 | VAM7          |
| YLR410W                                          | VIP1          | YJL140W                 | RPB4          |

| Predictions at threshold level 0.75 continued... |               |                         |               |
|--------------------------------------------------|---------------|-------------------------|---------------|
| Gene1 of predicted pair                          |               | Gene2 of predicted pair |               |
| Systematic Name                                  | Standard Name | Systematic Name         | Standard Name |
| YJR059W                                          | PTK2          | YNL199C                 | GCR2          |
| YBL047C                                          | EDE1          | YGL163C                 | RAD54         |
| YNL106C                                          | INP52         | YDL226C                 | GCS1          |
| YDL020C                                          | RPN4          | YGR072W                 | UPF3          |
| YLL039C                                          | UBI4          | YOR035C                 | SHE4          |
| YDL013W                                          | SLX5          | YFR036W                 | CDC26         |
| YGR270W                                          | YTA7          | YEL053C                 | MAK10         |
| YNL215W                                          | IES2          | YKL048C                 | ELM1          |
| YDL020C                                          | RPN4          | YGR188C                 | BUB1          |
| YLR095C                                          | IOC2          | YDL184C                 | RPL41A        |
| YHR098C                                          | SFB3          | YML041C                 | VPS71         |
| YPR101W                                          | SNT309        | YIR005W                 | IST3          |
| YKR035W-A                                        | DID2          | YCR053W                 | THR4          |
| YPR017C                                          | DSS4          | YDR080W                 | VPS41         |
| YKL110C                                          | KTI12         | YGR188C                 | BUB1          |
| YDR484W                                          | VPS52         | YNL041C                 | COG6          |
| YBR017C                                          | KAP104        | YKL068W                 | NUP100        |
| YBR200W                                          | BEM1          | YDR507C                 | GIN4          |
| YLR234W                                          | TOP3          | YGL003C                 | CDH1          |
| YGR249W                                          | MGA1          | YOR270C                 | VPH1          |
| YER144C                                          | UBP5          | YDL083C                 | RPS16B        |
| YOL112W                                          | MSB4          | YNR049C                 | MSO1          |
| YPL129W                                          | TAF14         | YOL148C                 | SPT20         |
| YHR206W                                          | SKN7          | YER118C                 | SHO1          |
| YDR146C                                          | SWI5          | YPL161C                 | BEM4          |
| YER087C-B                                        | SBH1          | YGR100W                 | MDR1          |
| YDR225W                                          | HTA1          | YJR135C                 | MCM22         |
| YBL058W                                          | SHP1          | YOR043W                 | WHI2          |
| YPR046W                                          | MCM16         | YNL225C                 | CNM67         |

| Predictions at threshold level 0.75 continued... |               |                         |               |
|--------------------------------------------------|---------------|-------------------------|---------------|
| Gene1 of predicted pair                          |               | Gene2 of predicted pair |               |
| Systematic Name                                  | Standard Name | Systematic Name         | Standard Name |
| YHL020C                                          | OPI1          | YHR012W                 | VPS29         |
| YLR090W                                          | XDJ1          | YIL159W                 | BNR1          |
| YDR076W                                          | RAD55         | YLR370C                 | ARC18         |
| YPR017C                                          | DSS4          | YDR310C                 | SUM1          |
| YGL223C                                          | COG1          | YJR035W                 | RAD26         |
| YER075C                                          | PTP3          | YOR231W                 | MKK1          |
| YLR216C                                          | CPR6          | YNL069C                 | RPL16B        |
| YPL115C                                          | BEM3          | YGR019W                 | UGA1          |
| YDR225W                                          | HTA1          | YER110C                 | KAP123        |
| YPR084W                                          | YPR084W       | YER161C                 | SPT2          |
| YLR119W                                          | SRN2          | YBR019C                 | GAL10         |
| YGR014W                                          | MSB2          | YPL180W                 | TCO89         |
| YMR004W                                          | MVP1          | YOR106W                 | VAM3          |
| YBR200W                                          | BEM1          | YLR371W                 | ROM2          |
| YML115C                                          | VAN1          | YBR082C                 | UBC4          |
| YKL116C                                          | PRR1          | YBR280C                 | SAF1          |
| YNL127W                                          | FAR11         | YNR032W                 | PPG1          |
| YDR202C                                          | RAV2          | YOL108C                 | INO4          |
| YGL078C                                          | DBP3          | YKR035W-A               | DID2          |
| YER116C                                          | SLX8          | YBR171W                 | SEC66         |
| YPL024W                                          | RMI1          | YBL025W                 | RRN10         |
| YPL152W                                          | RRD2          | YNL116W                 | DMA2          |
| YIL076W                                          | SEC28         | YLR182W                 | SWI6          |
| YDR254W                                          | CHL4          | YJR032W                 | CPR7          |
| YBR030W                                          | YBR030W       | YPL195W                 | APL5          |
| YLR386W                                          | VAC14         | YBR258C                 | SHG1          |
| YLR362W                                          | STE11         | YBL075C                 | SSA3          |
| YDR156W                                          | RPA14         | YGR188C                 | BUB1          |
| YEL043W                                          | YEL043W       | YDL006W                 | PTC1          |

| Predictions at threshold level 0.75 continued... |               |                         |               |
|--------------------------------------------------|---------------|-------------------------|---------------|
| Gene1 of predicted pair                          |               | Gene2 of predicted pair |               |
| Systematic Name                                  | Standard Name | Systematic Name         | Standard Name |
| YKL116C                                          | PRR1          | YKL048C                 | ELM1          |
| YJR040W                                          | GEF1          | YKR001C                 | VPS1          |
| YBR108W                                          | YBR108W       | YNL107W                 | YAF9          |
| YOR083W                                          | WHI5          | YPL022W                 | RAD1          |
| YMR054W                                          | STV1          | YER122C                 | GLO3          |
| YJL006C                                          | CTK2          | YDR289C                 | RTT103        |
| YBR084C-A                                        | RPL19A        | YBL087C                 | RPL23A        |
| YGL147C                                          | RPL9A         | YNL041C                 | COG6          |
| YHR200W                                          | RPN10         | YHR039C-A               | VMA10         |
| YGL237C                                          | HAP2          | YMR109W                 | MYO5          |
| YOR270C                                          | VPH1          | YPR119W                 | CLB2          |
| YDR171W                                          | HSP42         | YPR046W                 | MCM16         |
| YGL147C                                          | RPL9A         | YDR207C                 | UME6          |
| YLR079W                                          | SIC1          | YDR254W                 | CHL4          |
| YEL009C                                          | GCN4          | YPR072W                 | NOT5          |
| YLR102C                                          | APC9          | YHR115C                 | DMA1          |
| YML001W                                          | YPT7          | YML071C                 | COG8          |
| YLR095C                                          | IOC2          | YOL121C                 | RPS19A        |
| YGR261C                                          | APL6          | YPL057C                 | SUR1          |
| YNL106C                                          | INP52         | YDR080W                 | VPS41         |
| YGL043W                                          | DST1          | YGL178W                 | MPT5          |
| YOR023C                                          | AHC1          | YDR144C                 | MKC7          |
| YGR067C                                          | YGR067C       | YPL240C                 | HSP82         |
| YMR172W                                          | HOT1          | YPR046W                 | MCM16         |
| YHR108W                                          | GGA2          | YOR124C                 | UBP2          |
| YDL227C                                          | HO            | YML088W                 | UFO1          |
| YJL058C                                          | BIT61         | YDR200C                 | VPS64         |
| YMR026C                                          | PEX12         | YHR060W                 | VMA22         |
| YGL025C                                          | PGD1          | YDL083C                 | RPS16B        |

| Predictions at threshold level 0.75 continued... |               |                         |               |
|--------------------------------------------------|---------------|-------------------------|---------------|
| Gene1 of predicted pair                          |               | Gene2 of predicted pair |               |
| Systematic Name                                  | Standard Name | Systematic Name         | Standard Name |
| YPL234C                                          | TFP3          | YKL119C                 | VPH2          |
| YCR081W                                          | SRB8          | YKL139W                 | CTK1          |
| YAL014C                                          | SYN8          | YOR106W                 | VAM3          |
| YGL006W                                          | PMC1          | YLR093C                 | NYV1          |
| YOR327C                                          | SNC2          | YLR309C                 | IMH1          |
| YDR289C                                          | RTT103        | YNL225C                 | CNM67         |
| YOR327C                                          | SNC2          | YNL127W                 | FAR11         |
| YBR278W                                          | DPB3          | YJL124C                 | LSM1          |
| YNL329C                                          | PEX6          | YMR089C                 | YTA12         |
| YMR311C                                          | GLC8          | YLR398C                 | SKI2          |
| YGL078C                                          | DBP3          | YFL023W                 | BUD27         |
| YPR046W                                          | MCM16         | YLR180W                 | SAM1          |
| YDR443C                                          | SSN2          | YEL053C                 | MAK10         |
| YLR240W                                          | VPS34         | YDR129C                 | SAC6          |
| YLR435W                                          | TSR2          | YOL081W                 | IRA2          |
| YGL178W                                          | MPT5          | YBL061C                 | SKT5          |
| YHR098C                                          | SFB3          | YBL061C                 | SKT5          |
| YCR020C-A                                        | MAK31         | YDR320C                 | SWA2          |
| YPR036W                                          | VMA13         | YFR036W                 | CDC26         |
| YOR035C                                          | SHE4          | YPR119W                 | CLB2          |
| YDR443C                                          | SSN2          | YNL238W                 | KEX2          |
| YDR156W                                          | RPA14         | YGR217W                 | CCH1          |
| YNL135C                                          | FPR1          | YGL252C                 | RTG2          |
| YIL159W                                          | BNR1          | YGL115W                 | SNF4          |
| YLR292C                                          | SEC72         | YPL018W                 | CTF19         |
| YKL139W                                          | CTK1          | YPL248C                 | GAL4          |
| YDR245W                                          | MNN10         | YLR425W                 | TUS1          |
| YER096W                                          | SHC1          | YJL095W                 | BCK1          |
| YDR335W                                          | MSN5          | YHR013C                 | ARD1          |

| Predictions at threshold level 0.75 continued... |               |                         |               |
|--------------------------------------------------|---------------|-------------------------|---------------|
| Gene1 of predicted pair                          |               | Gene2 of predicted pair |               |
| Systematic Name                                  | Standard Name | Systematic Name         | Standard Name |
| YLR079W                                          | SIC1          | YHR205W                 | SCH9          |
| YGR275W                                          | RTT102        | YLR357W                 | RSC2          |
| YGR133W                                          | PEX4          | YBL047C                 | EDE1          |
| YLR441C                                          | RPS1A         | YOR066W                 | MSA1          |
| YER110C                                          | KAP123        | YHR114W                 | BZZ1          |
| YIL053W                                          | RHR2          | YHR081W                 | LRP1          |
| YNL291C                                          | MID1          | YER116C                 | SLX8          |
| YPL042C                                          | SSN3          | YBR194W                 | SOY1          |
| YHR039C-A                                        | VMA10         | YLR398C                 | SKI2          |
| YLR095C                                          | IOC2          | YEL060C                 | PRB1          |
| YOR023C                                          | AHC1          | YGR054W                 | YGR054W       |
| YGR239C                                          | PEX21         | YLR191W                 | PEX13         |
| YBL021C                                          | HAP3          | YKL109W                 | HAP4          |
| YBR195C                                          | MSI1          | YHR039C-A               | VMA10         |
| YDR108W                                          | GSG1          | YPL161C                 | BEM4          |
| YIL072W                                          | HOP1          | YOR351C                 | MEK1          |
| YHL031C                                          | GOS1          | YLR396C                 | VPS33         |
| YNL325C                                          | FIG4          | YOR270C                 | VPH1          |
| YPR084W                                          | YPR084W       | YML038C                 | YMD8          |
| YPR029C                                          | APL4          | YOR036W                 | PEP12         |
| YPL129W                                          | TAF14         | YKL109W                 | HAP4          |
| YDR163W                                          | CWC15         | YJR050W                 | ISY1          |
| YHR012W                                          | VPS29         | YJR090C                 | GRR1          |
| YJR040W                                          | GEF1          | YDR207C                 | UME6          |
| YIL036W                                          | CST6          | YJL124C                 | LSM1          |
| YCR088W                                          | ABP1          | YDR310C                 | SUM1          |
| YJL172W                                          | CPS1          | YNR072W                 | HXT17         |
| YLR386W                                          | VAC14         | YOL121C                 | RPS19A        |
| YLR095C                                          | IOC2          | YBR019C                 | GAL10         |

| Predictions at threshold level 0.75 continued... |               |                         |               |
|--------------------------------------------------|---------------|-------------------------|---------------|
| Gene1 of predicted pair                          |               | Gene2 of predicted pair |               |
| Systematic Name                                  | Standard Name | Systematic Name         | Standard Name |
| YNL106C                                          | INP52         | YJR060W                 | CBF1          |
| YER044C                                          | ERG28         | YMR133W                 | REC114        |
| YDR254W                                          | CHL4          | YPL161C                 | BEM4          |
| YPL024W                                          | RMI1          | YER122C                 | GLO3          |
| YGR249W                                          | MGA1          | YBL025W                 | RRN10         |
| YOR043W                                          | WHI2          | YOR035C                 | SHE4          |
| YLR083C                                          | EMP70         | YKR030W                 | GMH1          |
| YOR270C                                          | VPH1          | YLR180W                 | SAM1          |
| YDR507C                                          | GIN4          | YDR309C                 | GIC2          |
| YDR076W                                          | RAD55         | YPR119W                 | CLB2          |
| YPL129W                                          | TAF14         | YGR252W                 | GCN5          |
| YDR146C                                          | SWI5          | YHR205W                 | SCH9          |
| YNL288W                                          | CAF40         | YBL051C                 | PIN4          |
| YGR108W                                          | CLB1          | YDL226C                 | GCS1          |
| YKL007W                                          | CAP1          | YPR171W                 | BSP1          |
| YOR109W                                          | INP53         | YER162C                 | RAD4          |
| YER001W                                          | MNN1          | YGL223C                 | COG1          |
| YGL147C                                          | RPL9A         | YLR192C                 | HCR1          |
| YLL039C                                          | UBI4          | YPL050C                 | MNN9          |
| YJL154C                                          | VPS35         | YOR327C                 | SNC2          |
| YBL102W                                          | SFT2          | YDR153C                 | ENT5          |
| YDR174W                                          | HMO1          | YKR061W                 | KTR2          |
| YIL053W                                          | RHR2          | YOR337W                 | TEA1          |
| YGL087C                                          | MMS2          | YPL161C                 | BEM4          |
| YGL066W                                          | SGF73         | YJL140W                 | RPB4          |
| YER087C-B                                        | SBH1          | YDL232W                 | OST4          |
| YLR386W                                          | VAC14         | YER044C                 | ERG28         |
| YDR108W                                          | GSG1          | YNL297C                 | MON2          |
| YCR031C                                          | RPS14A        | YGR188C                 | BUB1          |

| Predictions at threshold level 0.75 continued... |               |                         |               |
|--------------------------------------------------|---------------|-------------------------|---------------|
| Gene1 of predicted pair                          |               | Gene2 of predicted pair |               |
| Systematic Name                                  | Standard Name | Systematic Name         | Standard Name |
| YGR261C                                          | APL6          | YNL051W                 | COG5          |
| YDR174W                                          | HMO1          | YLR135W                 | SLX4          |
| YGL100W                                          | SEH1          | YPL240C                 | HSP82         |
| YLR148W                                          | PEP3          | YBL078C                 | ATG8          |
| YLR061W                                          | RPL22A        | YGR133W                 | PEX4          |
| YIL034C                                          | CAP2          | YJR090C                 | GRR1          |
| YGL033W                                          | HOP2          | YBR019C                 | GAL10         |
| YPR046W                                          | MCM16         | YDR358W                 | GGA1          |
| YNL238W                                          | KEX2          | YOL121C                 | RPS19A        |
| YHR098C                                          | SFB3          | YER016W                 | BIM1          |
| YDR139C                                          | RUB1          | YLR128W                 | DCN1          |
| YMR224C                                          | MRE11         | YML058W                 | SML1          |
| YDR443C                                          | SSN2          | YGL003C                 | CDH1          |
| YLR273C                                          | PIG1          | YIL045W                 | PIG2          |
| YOR001W                                          | RRP6          | YOR038C                 | HIR2          |
| YLR079W                                          | SIC1          | YBR215W                 | HPC2          |
| YEL009C                                          | GCN4          | YPL042C                 | SSN3          |
| YMR038C                                          | CCS1          | YLR350W                 | ORM2          |
| YJL127C                                          | SPT10         | YOR001W                 | RRP6          |
| YDR144C                                          | MKC7          | YPR046W                 | MCM16         |
| YLR095C                                          | IOC2          | YLR386W                 | VAC14         |
| YPR036W                                          | VMA13         | YPL161C                 | BEM4          |
| YNL054W                                          | VAC7          | YNL107W                 | YAF9          |
| YML013W                                          | UBX2          | YPR089W                 | YPR089W       |
| YGR081C                                          | SLX9          | YMR038C                 | CCS1          |
| YGL135W                                          | RPL1B         | YMR198W                 | CIK1          |
| YEL050C                                          | RML2          | YBR200W                 | BEM1          |
| YML115C                                          | VAN1          | YMR016C                 | SOK2          |
| YPL115C                                          | BEM3          | YJL187C                 | SWE1          |



| Predictions at threshold level 0.75 continued... |               |                         |               |
|--------------------------------------------------|---------------|-------------------------|---------------|
| Gene1 of predicted pair                          |               | Gene2 of predicted pair |               |
| Systematic Name                                  | Standard Name | Systematic Name         | Standard Name |
| YNL238W                                          | KEX2          | YMR152W                 | YIM1          |
| YJL036W                                          | SNX4          | YHR039C-A               | VMA10         |
| YLR192C                                          | HCR1          | YKR014C                 | YPT52         |
| YPL057C                                          | SUR1          | YDR261C                 | EXG2          |
| YMR142C                                          | RPL13B        | YDL184C                 | RPL41A        |
| YBR215W                                          | HPC2          | YGL003C                 | CDH1          |
| YJL124C                                          | LSM1          | YOL054W                 | PSH1          |
| YMR004W                                          | MVP1          | YNR032W                 | PPG1          |
| YLR360W                                          | VPS38         | YML115C                 | VAN1          |
| YGL147C                                          | RPL9A         | YPL195W                 | APL5          |
| YOR080W                                          | DIA2          | YLR182W                 | SWI6          |
| YPL161C                                          | BEM4          | YDR469W                 | SDC1          |
| YBR215W                                          | HPC2          | YLR370C                 | ARC18         |
| YMR153W                                          | NUP53         | YHR081W                 | LRP1          |
| YNR052C                                          | POP2          | YML016C                 | PPZ1          |
| YDL116W                                          | NUP84         | YJR035W                 | RAD26         |
| YER116C                                          | SLX8          | YKR099W                 | BAS1          |
| YMR133W                                          | REC114        | YOR327C                 | SNC2          |
| YEL009C                                          | GCN4          | YLR176C                 | RFX1          |
| YOR023C                                          | AHC1          | YLR233C                 | EST1          |
| YNL087W                                          | TCB2          | YLR441C                 | RPS1A         |
| YKL126W                                          | YPK1          | YOR043W                 | WHI2          |
| YBR200W                                          | BEM1          | YJR084W                 | CSN12         |
| YNR032W                                          | PPG1          | YKR030W                 | GMH1          |
| YDR293C                                          | SSD1          | YGL151W                 | NUT1          |
| YMR224C                                          | MRE11         | YPR036W                 | VMA13         |
| YDR108W                                          | GSG1          | YJL004C                 | SYS1          |
| YLR170C                                          | APS1          | YOR036W                 | PEP12         |
| YBR173C                                          | UMP1          | YBR019C                 | GAL10         |

| Predictions at threshold level 0.75 continued... |               |                         |               |
|--------------------------------------------------|---------------|-------------------------|---------------|
| Gene1 of predicted pair                          |               | Gene2 of predicted pair |               |
| Systematic Name                                  | Standard Name | Systematic Name         | Standard Name |
| YBL047C                                          | EDE1          | YPR120C                 | CLB5          |
| YPR018W                                          | RLF2          | YGR081C                 | SLX9          |
| YML103C                                          | NUP188        | YPL246C                 | RBD2          |
| YMR109W                                          | MYO5          | YHR016C                 | YSC84         |
| YHR012W                                          | VPS29         | YOL018C                 | TLG2          |
| YPL129W                                          | TAF14         | YER161C                 | SPT2          |
| YJR040W                                          | GEF1          | YGL115W                 | SNF4          |
| YNL297C                                          | MON2          | YNR032W                 | PPG1          |
| YGL170C                                          | SPO74         | YOL091W                 | SPO21         |
| YNL041C                                          | COG6          | YDR153C                 | ENT5          |
| YNL291C                                          | MID1          | YPL105C                 | YPL105C       |
| YPR036W                                          | VMA13         | YLR371W                 | ROM2          |
| YDR108W                                          | GSG1          | YDL006W                 | PTC1          |
| YNL236W                                          | SIN4          | YLR306W                 | UBC12         |
| YHR060W                                          | VMA22         | YEL043W                 | YEL043W       |
| YML103C                                          | NUP188        | YKL117W                 | SBA1          |
| YEL065W                                          | SIT1          | YER116C                 | SLX8          |
| YDR004W                                          | RAD57         | YDL154W                 | MSH5          |
| YLR240W                                          | VPS34         | YDR323C                 | PEP7          |
| YDR202C                                          | RAV2          | YPL037C                 | EGD1          |
| YJR040W                                          | GEF1          | YMR054W                 | STV1          |
| YHR111W                                          | UBA4          | YGR152C                 | RSR1          |
| YDR108W                                          | GSG1          | YCR066W                 | RAD18         |
| YJR140C                                          | HIR3          | YBR089C-A               | NHP6B         |
| YGL237C                                          | HAP2          | YBR114W                 | RAD16         |
| YNR052C                                          | POP2          | YPL022W                 | RAD1          |
| YHR171W                                          | ATG7          | YOR327C                 | SNC2          |
| YML001W                                          | YPT7          | YLR180W                 | SAM1          |
| YLR292C                                          | SEC72         | YLR381W                 | CTF3          |

| Predictions at threshold level 0.75 continued... |               |                         |               |
|--------------------------------------------------|---------------|-------------------------|---------------|
| Gene1 of predicted pair                          |               | Gene2 of predicted pair |               |
| Systematic Name                                  | Standard Name | Systematic Name         | Standard Name |
| YNL288W                                          | CAF40         | YLR234W                 | TOP3          |
| YHL031C                                          | GOS1          | YAL030W                 | SNC1          |
| YDR378C                                          | LSM6          | YJL095W                 | BCK1          |
| YDR146C                                          | SWI5          | YDR310C                 | SUM1          |
| YGL163C                                          | RAD54         | YLR315W                 | NKP2          |
| YKL007W                                          | CAP1          | YNL243W                 | SLA2          |
| YOR337W                                          | TEA1          | YER162C                 | RAD4          |
| YEL027W                                          | CUP5          | YLR447C                 | VMA6          |
| YHR081W                                          | LRP1          | YMR152W                 | YIM1          |
| YGL003C                                          | CDH1          | YLR182W                 | SWI6          |
| YDR192C                                          | NUP42         | YLR131C                 | ACE2          |
| YNL229C                                          | URE2          | YDL047W                 | SIT4          |
| YLR191W                                          | PEX13         | YDR265W                 | PEX10         |
| YJL124C                                          | LSM1          | YJL006C                 | CTK2          |
| YOR033C                                          | EXO1          | YML028W                 | TSA1          |
| YPR084W                                          | YPR084W       | YJR140C                 | HIR3          |
| YOR106W                                          | VAM3          | YNR032W                 | PPG1          |
| YBR019C                                          | GAL10         | YBL025W                 | RRN10         |
| YFR010W                                          | UBP6          | YDL223C                 | HBT1          |
| YHR073W                                          | OSH3          | YMR153W                 | NUP53         |
| YDL116W                                          | NUP84         | YHR134W                 | WSS1          |
| YDR378C                                          | LSM6          | YML112W                 | CTK3          |
| YLR240W                                          | VPS34         | YLR360W                 | VPS38         |
| YDR443C                                          | SSN2          | YIL159W                 | BNR1          |
| YEL009C                                          | GCN4          | YGL252C                 | RTG2          |
| YBR173C                                          | UMP1          | YER044C                 | ERG28         |
| YKR095W                                          | MLP1          | YDR076W                 | RAD55         |
| YGL147C                                          | RPL9A         | YLR386W                 | VAC14         |
| YBR290W                                          | BSD2          | YKL068W                 | NUP100        |

| Predictions at threshold level 0.75 continued... |               |                         |               |
|--------------------------------------------------|---------------|-------------------------|---------------|
| Gene1 of predicted pair                          |               | Gene2 of predicted pair |               |
| Systematic Name                                  | Standard Name | Systematic Name         | Standard Name |
| YER116C                                          | SLX8          | YER040W                 | GLN3          |
| YCR077C                                          | PAT1          | YGR135W                 | PRE9          |
| YGR249W                                          | MGA1          | YLR192C                 | HCR1          |
| YMR224C                                          | MRE11         | YMR179W                 | SPT21         |
| YGR020C                                          | VMA7          | YJL095W                 | BCK1          |
| YKR048C                                          | NAP1          | YNL078W                 | NIS1          |
| YGL087C                                          | MMS2          | YJR032W                 | CPR7          |
| YMR055C                                          | BUB2          | YDL013W                 | SLX5          |
| YHR178W                                          | STB5          | YGL013C                 | PDR1          |
| YDR293C                                          | SSD1          | YJL095W                 | BCK1          |
| YNL087W                                          | TCB2          | YCR053W                 | THR4          |
| YNL236W                                          | SIN4          | YDL226C                 | GCS1          |
| YLR240W                                          | VPS34         | YLR396C                 | VPS33         |
| YBR108W                                          | YBR108W       | YMR152W                 | YIM1          |
| YEL065W                                          | SIT1          | YDR358W                 | GGA1          |
| YFR024C-A                                        | LSB3          | YJL004C                 | SYS1          |
| YPR131C                                          | NAT3          | YBR215W                 | HPC2          |
| YOR066W                                          | MSA1          | YLR371W                 | ROM2          |
| YKR099W                                          | BAS1          | YOR035C                 | SHE4          |
| YOR106W                                          | VAM3          | YHR115C                 | DMA1          |
| YLR090W                                          | XDJ1          | YMR142C                 | RPL13B        |
| YLR399C                                          | BDF1          | YBR107C                 | IML3          |
| YER042W                                          | MXR1          | YGR209C                 | TRX2          |
| YDR496C                                          | PUF6          | YKL130C                 | SHE2          |
| YOR327C                                          | SNC2          | YDL047W                 | SIT4          |
| YPR084W                                          | YPR084W       | YHL020C                 | OPI1          |
| YML115C                                          | VAN1          | YDR260C                 | SWM1          |
| YNL291C                                          | MID1          | YJR033C                 | RAV1          |
| YLR337C                                          | VRP1          | YKL006W                 | RPL14A        |

| Predictions at threshold level 0.75 continued... |               |                         |               |
|--------------------------------------------------|---------------|-------------------------|---------------|
| Gene1 of predicted pair                          |               | Gene2 of predicted pair |               |
| Systematic Name                                  | Standard Name | Systematic Name         | Standard Name |
| YMR039C                                          | SUB1          | YBR215W                 | HPC2          |
| YBR030W                                          | YBR030W       | YER116C                 | SLX8          |
| YOR083W                                          | WHI5          | YPR119W                 | CLB2          |
| YNL199C                                          | GCR2          | YDR363W-A               | SEM1          |
| YLR433C                                          | CNA1          | YGR006W                 | PRP18         |
| YPR084W                                          | YPR084W       | YLR360W                 | VPS38         |
| YLR292C                                          | SEC72         | YJR090C                 | GRR1          |
| YGL025C                                          | PGD1          | YNR072W                 | HXT17         |
| YDR171W                                          | HSP42         | YDR318W                 | MCM21         |
| YLR234W                                          | TOP3          | YJL138C                 | TIF2          |
| YNL307C                                          | MCK1          | YIR005W                 | IST3          |
| YEL043W                                          | YEL043W       | YLR309C                 | IMH1          |
| YMR224C                                          | MRE11         | YML071C                 | COG8          |
| YNL041C                                          | COG6          | YKR014C                 | YPT52         |
| YLR095C                                          | IOC2          | YHR081W                 | LRP1          |
| YEL043W                                          | YEL043W       | YML071C                 | COG8          |
| YDR079C-A                                        | TFB5          | YPL240C                 | HSP82         |
| YKL139W                                          | CTK1          | YCL011C                 | GBP2          |
| YKR099W                                          | BAS1          | YNL076W                 | MKS1          |
| YOR080W                                          | DIA2          | YPL018W                 | CTF19         |
| YOR127W                                          | RGA1          | YDL047W                 | SIT4          |
| YMR205C                                          | PFK2          | YBR131W                 | CCZ1          |
| YDL020C                                          | RPN4          | YJR035W                 | RAD26         |
| YPL240C                                          | HSP82         | YGR296W                 | YRF1-3        |
| YIL159W                                          | BNR1          | YKR099W                 | BAS1          |
| YDL184C                                          | RPL41A        | YFR036W                 | CDC26         |
| YCL027W                                          | FUS1          | YKL092C                 | BUD2          |
| YLR337C                                          | VRP1          | YNL079C                 | TPM1          |
| YLR441C                                          | RPS1A         | YER139C                 | YER139C       |

| Predictions at threshold level 0.75 continued... |               |                         |               |
|--------------------------------------------------|---------------|-------------------------|---------------|
| Gene1 of predicted pair                          |               | Gene2 of predicted pair |               |
| Systematic Name                                  | Standard Name | Systematic Name         | Standard Name |
| YNL218W                                          | MGS1          | YBR228W                 | SLX1          |
| YKR020W                                          | VPS51         | YHR039C-A               | VMA10         |
| YOL126C                                          | MDH2          | YMR164C                 | MSS11         |
| YMR284W                                          | YKU70         | YOL030W                 | GAS5          |
| YHR205W                                          | SCH9          | YNL271C                 | BNI1          |
| YOR243C                                          | PUS7          | YGR071C                 | YGR071C       |
| YDR245W                                          | MNN10         | YBL072C                 | RPS8A         |
| YCR020C-A                                        | MAK31         | YNL107W                 | YAF9          |
| YLR360W                                          | VPS38         | YAL002W                 | VPS8          |
| YBR030W                                          | YBR030W       | YJL183W                 | MNN11         |
| YGR054W                                          | YGR054W       | YAR014C                 | BUD14         |
| YBL003C                                          | HTA2          | YNL107W                 | YAF9          |
| YGL054C                                          | ERV14         | YKR030W                 | GMH1          |
| YJR032W                                          | CPR7          | YNL076W                 | MKS1          |
| YCR077C                                          | PAT1          | YBL101C                 | ECM21         |
| YDR146C                                          | SWI5          | YML016C                 | PPZ1          |
| YKR001C                                          | VPS1          | YJR060W                 | CBF1          |
| YKL139W                                          | CTK1          | YML001W                 | YPT7          |
| YFR010W                                          | UBP6          | YDR477W                 | SNF1          |
| YBR108W                                          | YBR108W       | YPL161C                 | BEM4          |
| YLR452C                                          | SST2          | YJL006C                 | CTK2          |
| YDL005C                                          | MED2          | YNL236W                 | SIN4          |
| YDL116W                                          | NUP84         | YML103C                 | NUP188        |
| YHR178W                                          | STB5          | YGL237C                 | HAP2          |
| YJR060W                                          | CBF1          | YER122C                 | GLO3          |
| YIL076W                                          | SEC28         | YPR046W                 | MCM16         |
| YHR039C-A                                        | VMA10         | YDL192W                 | ARF1          |
| YKL139W                                          | CTK1          | YMR089C                 | YTA12         |
| YPL115C                                          | BEM3          | YDR293C                 | SSD1          |

| Predictions at threshold level 0.75 continued... |               |                         |               |
|--------------------------------------------------|---------------|-------------------------|---------------|
| Gene1 of predicted pair                          |               | Gene2 of predicted pair |               |
| Systematic Name                                  | Standard Name | Systematic Name         | Standard Name |
| YGL087C                                          | MMS2          | YGR184C                 | UBR1          |
| YEL050C                                          | RML2          | YDR318W                 | MCM21         |
| YNL044W                                          | YIP3          | YJR032W                 | CPR7          |
| YOR127W                                          | RGA1          | YHR111W                 | UBA4          |
| YCR020C-A                                        | MAK31         | YJR033C                 | RAV1          |
| YKL116C                                          | PRR1          | YMR230W                 | RPS10B        |
| YBR231C                                          | SWC5          | YGL094C                 | PAN2          |
| YJR040W                                          | GEF1          | YPL120W                 | VPS30         |
| YNL325C                                          | FIG4          | YDL077C                 | VAM6          |
| YDR144C                                          | MKC7          | YDR310C                 | SUM1          |
| YBR200W                                          | BEM1          | YGL115W                 | SNF4          |
| YPL105C                                          | YPL105C       | YNR032W                 | PPG1          |
| YGL025C                                          | PGD1          | YPL248C                 | GAL4          |
| YFR031C-A                                        | RPL2A         | YJL004C                 | SYS1          |
| YNL236W                                          | SIN4          | YNL107W                 | YAF9          |
| YDL116W                                          | NUP84         | YKR061W                 | KTR2          |
| YML016C                                          | PPZ1          | YDR335W                 | MSN5          |
| YMR127C                                          | SAS2          | YNL166C                 | BNI5          |
| YPR131C                                          | NAT3          | YDR171W                 | HSP42         |
| YDR245W                                          | MNN10         | YKL041W                 | VPS24         |
| YMR109W                                          | MYO5          | YOR247W                 | SRL1          |
| YNL025C                                          | SSN8          | YKL213C                 | DOA1          |
| YLR083C                                          | EMP70         | YFR031C-A               | RPL2A         |
| YHR111W                                          | UBA4          | YOR327C                 | SNC2          |
| YOR112W                                          | CEX1          | YML071C                 | COG8          |
| YKL139W                                          | CTK1          | YMR016C                 | SOK2          |
| YOR132W                                          | VPS17         | YBR108W                 | YBR108W       |
| YGR104C                                          | SRB5          | YGL151W                 | NUT1          |
| YGL212W                                          | VAM7          | YGL200C                 | EMP24         |

| Predictions at threshold level 0.75 continued... |               |                         |               |
|--------------------------------------------------|---------------|-------------------------|---------------|
| Gene1 of predicted pair                          |               | Gene2 of predicted pair |               |
| Systematic Name                                  | Standard Name | Systematic Name         | Standard Name |
| YHR013C                                          | ARD1          | YKL160W                 | ELF1          |
| YML012W                                          | ERV25         | YNL238W                 | KEX2          |
| YHL025W                                          | SNF6          | YLR357W                 | RSC2          |
| YER052C                                          | HOM3          | YNL135C                 | FPR1          |
| YLR398C                                          | SKI2          | YLR180W                 | SAM1          |
| YLR315W                                          | NKP2          | YHR167W                 | THP2          |
| YOR337W                                          | TEA1          | YMR026C                 | PEX12         |
| YMR026C                                          | PEX12         | YOL121C                 | RPS19A        |
| YNL199C                                          | GCR2          | YLR350W                 | ORM2          |
| YHR013C                                          | ARD1          | YIR005W                 | IST3          |
| YOR156C                                          | NFI1          | YDR469W                 | SDC1          |
| YER120W                                          | SCS2          | YML071C                 | COG8          |
| YPL253C                                          | VIK1          | YJR060W                 | CBF1          |
| YEL053C                                          | MAK10         | YDL077C                 | VAM6          |
| YML115C                                          | VAN1          | YKL119C                 | VPH2          |
| YNL087W                                          | TCB2          | YMR152W                 | YIM1          |
| YBR171W                                          | SEC66         | YBL047C                 | EDE1          |
| YJL172W                                          | CPS1          | YDL192W                 | ARF1          |
| YDR477W                                          | SNF1          | YOR106W                 | VAM3          |
| YKR001C                                          | VPS1          | YMR204C                 | INP1          |
| YLR456W                                          | YLR456W       | YPR119W                 | CLB2          |
| YGR135W                                          | PRE9          | YAR014C                 | BUD14         |
| YAL016W                                          | TPD3          | YDL047W                 | SIT4          |
| YLR381W                                          | CTF3          | YJR063W                 | RPA12         |
| YDR137W                                          | RGP1          | YOL111C                 | MDY2          |
| YJL176C                                          | SWI3          | YHR134W                 | WSS1          |
| YNL054W                                          | VAC7          | YDR335W                 | MSN5          |
| YGL223C                                          | COG1          | YEL053C                 | MAK10         |
| YLR095C                                          | IOC2          | YPL161C                 | BEM4          |



| Predictions at threshold level 0.75 continued... |               |                         |               |
|--------------------------------------------------|---------------|-------------------------|---------------|
| Gene1 of predicted pair                          |               | Gene2 of predicted pair |               |
| Systematic Name                                  | Standard Name | Systematic Name         | Standard Name |
| YEL065W                                          | SIT1          | YMR142C                 | RPL13B        |
| YPR084W                                          | YPR084W       | YBL102W                 | SFT2          |
| YMR142C                                          | RPL13B        | YDR207C                 | UME6          |
| YCR065W                                          | HCM1          | YNL041C                 | COG6          |
| YLR216C                                          | CPR6          | YGL124C                 | MON1          |
| YIL034C                                          | CAP2          | YGL087C                 | MMS2          |
| YOR127W                                          | RGA1          | YHR012W                 | VPS29         |
| YPL161C                                          | BEM4          | YCR086W                 | CSM1          |
| YGR019W                                          | UGA1          | YPL018W                 | CTF19         |
| YGR104C                                          | SRB5          | YGL066W                 | SGF73         |
| YNL087W                                          | TCB2          | YPL161C                 | BEM4          |
| YMR192W                                          | GYL1          | YOR284W                 | HUA2          |
| YKL135C                                          | APL2          | YDR358W                 | GGA1          |
| YKR099W                                          | BAS1          | YOR327C                 | SNC2          |
| YBR107C                                          | IML3          | YOL054W                 | PSH1          |
| YLR386W                                          | VAC14         | YDR335W                 | MSN5          |
| YJL053W                                          | PEP8          | YPL037C                 | EGD1          |
| YOR080W                                          | DIA2          | YDR363W-A               | SEM1          |
| YBR215W                                          | HPC2          | YCR077C                 | PAT1          |
| YIL053W                                          | RHR2          | YNL325C                 | FIG4          |
| YBR217W                                          | ATG12         | YNL325C                 | FIG4          |
| YML112W                                          | CTK3          | YGL252C                 | RTG2          |
| YGR105W                                          | VMA21         | YDR358W                 | GGA1          |
| YEL065W                                          | SIT1          | YDL083C                 | RPS16B        |
| YOR112W                                          | CEX1          | YNL041C                 | COG6          |
| YHR013C                                          | ARD1          | YKR014C                 | YPT52         |
| YER019C-A                                        | SBH2          | YML019W                 | OST6          |
| YIL034C                                          | CAP2          | YDL155W                 | CLB3          |
| YLR119W                                          | SRN2          | YMR153W                 | NUP53         |

| Predictions at threshold level 0.75 continued... |               |                         |               |
|--------------------------------------------------|---------------|-------------------------|---------------|
| Gene1 of predicted pair                          |               | Gene2 of predicted pair |               |
| Systematic Name                                  | Standard Name | Systematic Name         | Standard Name |
| YNL325C                                          | FIG4          | YNR072W                 | HXT17         |
| YOR337W                                          | TEA1          | YBR019C                 | GAL10         |
| YBR131W                                          | CCZ1          | YBL101C                 | ECM21         |
| YPL037C                                          | EGD1          | YLR398C                 | SKI2          |
| YNL032W                                          | SIW14         | YMR273C                 | ZDS1          |
| YKR001C                                          | VPS1          | YML001W                 | YPT7          |
| YJL183W                                          | MNN11         | YNL076W                 | MKS1          |
| YOL051W                                          | GAL11         | YDR363W-A               | SEM1          |
| YNL243W                                          | SLA2          | YKL135C                 | APL2          |
| YOR290C                                          | SNF2          | YGL212W                 | VAM7          |
| YDR448W                                          | ADA2          | YPL042C                 | SSN3          |
| YLR301W                                          | YLR301W       | YPL240C                 | HSP82         |
| YJL176C                                          | SWI3          | YPL079W                 | RPL21B        |
| YGL087C                                          | MMS2          | YHL002W                 | HSE1          |
| YPL253C                                          | VIK1          | YGL115W                 | SNF4          |
| YMR116C                                          | ASC1          | YKL032C                 | IXR1          |
| YOR069W                                          | VPS5          | YPL037C                 | EGD1          |
| YMR095C                                          | SNO1          | YOR035C                 | SHE4          |
| YML001W                                          | YPT7          | YJL095W                 | BCK1          |
| YLR371W                                          | ROM2          | YPL195W                 | APL5          |
| YPR051W                                          | MAK3          | YHR060W                 | VMA22         |
| YLR192C                                          | HCR1          | YKL116C                 | PRR1          |
| YER161C                                          | SPT2          | YOR038C                 | HIR2          |
| YHR206W                                          | SKN7          | YJR074W                 | MOG1          |
| YEL065W                                          | SIT1          | YDR477W                 | SNF1          |
| YDR155C                                          | CPR1          | YNL107W                 | YAF9          |
| YDR171W                                          | HSP42         | YJR005W                 | APL1          |
| YJL154C                                          | VPS35         | YHR134W                 | WSS1          |
| YDL223C                                          | HBT1          | YNL076W                 | MKS1          |

| Predictions at threshold level 0.75 continued... |               |                         |               |
|--------------------------------------------------|---------------|-------------------------|---------------|
| Gene1 of predicted pair                          |               | Gene2 of predicted pair |               |
| Systematic Name                                  | Standard Name | Systematic Name         | Standard Name |
| YKL048C                                          | ELM1          | YEL060C                 | PRB1          |
| YGL147C                                          | RPL9A         | YNL058C                 | YNL058C       |
| YGR105W                                          | VMA21         | YKR030W                 | GMH1          |
| YOR270C                                          | VPH1          | YKL080W                 | VMA5          |
| YHR161C                                          | YAP1801       | YNR049C                 | MSO1          |
| YLR360W                                          | VPS38         | YKL048C                 | ELM1          |
| YDL223C                                          | HBT1          | YNL079C                 | TPM1          |
| YGL200C                                          | EMP24         | YKL041W                 | VPS24         |
| YDR469W                                          | SDC1          | YOR308C                 | SNU66         |
| YIL159W                                          | BNR1          | YNL032W                 | SIW14         |
| YJL089W                                          | SIP4          | YMR280C                 | CAT8          |
| YPL115C                                          | BEM3          | YLR006C                 | SSK1          |
| YHR200W                                          | RPN10         | YNL116W                 | DMA2          |
| YDR129C                                          | SAC6          | YDR389W                 | SAC7          |
| YKL025C                                          | PAN3          | YLR381W                 | CTF3          |
| YBR195C                                          | MSI1          | YGL163C                 | RAD54         |
| YPL022W                                          | RAD1          | YML102W                 | CAC2          |
| YJL053W                                          | PEP8          | YKR001C                 | VPS1          |
| YGL200C                                          | EMP24         | YBL072C                 | RPS8A         |
| YBR200W                                          | BEM1          | YDR171W                 | HSP42         |
| YPR018W                                          | RLF2          | YPL024W                 | RMI1          |
| YLR337C                                          | VRP1          | YHR111W                 | UBA4          |
| YLR234W                                          | TOP3          | YPR051W                 | MAK3          |
| YGL212W                                          | VAM7          | YAL030W                 | SNC1          |
| YAL010C                                          | MDM10         | YLR254C                 | NDL1          |
| YEL009C                                          | GCN4          | YBR111W-A               | SUS1          |
| YHR111W                                          | UBA4          | YGR054W                 | YGR054W       |
| YHR098C                                          | SFB3          | YJR075W                 | HOC1          |
| YBR200W                                          | BEM1          | YML016C                 | PPZ1          |

| Predictions at threshold level 0.75 continued... |               |                         |               |
|--------------------------------------------------|---------------|-------------------------|---------------|
| Gene1 of predicted pair                          |               | Gene2 of predicted pair |               |
| Systematic Name                                  | Standard Name | Systematic Name         | Standard Name |
| YBL051C                                          | PIN4          | YER110C                 | KAP123        |
| YPR036W                                          | VMA13         | YDL083C                 | RPS16B        |
| YHL027W                                          | RIM101        | YDR310C                 | SUM1          |
| YGL078C                                          | DBP3          | YDR477W                 | SNF1          |
| YML117W                                          | NAB6          | YBR131W                 | CCZ1          |
| YLR288C                                          | MEC3          | YDR076W                 | RAD55         |
| YDR440W                                          | DOT1          | YNL030W                 | HHF2          |
| YPR030W                                          | CSR2          | YJL183W                 | MNN11         |
| YNL309W                                          | STB1          | YLR452C                 | SST2          |
| YNL291C                                          | MID1          | YGL100W                 | SEH1          |
| YPL018W                                          | CTF19         | YOL091W                 | SPO21         |
| YLR234W                                          | TOP3          | YGR188C                 | BUB1          |
| YPL253C                                          | VIK1          | YKL048C                 | ELM1          |
| YLR441C                                          | RPS1A         | YLR452C                 | SST2          |
| YOR195W                                          | SLK19         | YLR032W                 | RAD5          |
| YPL001W                                          | HAT1          | YGL161C                 | YIP5          |
| YER116C                                          | SLX8          | YOR327C                 | SNC2          |
| YIL034C                                          | CAP2          | YBL021C                 | HAP3          |
| YGR270W                                          | YTA7          | YNL107W                 | YAF9          |
| YKL048C                                          | ELM1          | YLR425W                 | TUS1          |
| YAL024C                                          | LTE1          | YDR137W                 | RGP1          |
| YGR249W                                          | MGA1          | YJL172W                 | CPS1          |
| YBR173C                                          | UMP1          | YJL095W                 | BCK1          |
| YPR046W                                          | MCM16         | YGL151W                 | NUT1          |
| YKL116C                                          | PRR1          | YJL172W                 | CPS1          |
| YJL136C                                          | RPS21B        | YHR200W                 | RPN10         |
| YOR035C                                          | SHE4          | YOR327C                 | SNC2          |
| YGL253W                                          | HXK2          | YEL056W                 | HAT2          |
| YKL048C                                          | ELM1          | YMR133W                 | REC114        |

| Predictions at threshold level 0.75 continued... |               |                         |               |
|--------------------------------------------------|---------------|-------------------------|---------------|
| Gene1 of predicted pair                          |               | Gene2 of predicted pair |               |
| Systematic Name                                  | Standard Name | Systematic Name         | Standard Name |
| YFR010W                                          | UBP6          | YOR327C                 | SNC2          |
| YAL055W                                          | PEX22         | YKL041W                 | VPS24         |
| YOR337W                                          | TEA1          | YBR280C                 | SAF1          |
| YLR192C                                          | HCR1          | YMR142C                 | RPL13B        |
| YMR216C                                          | SKY1          | YGR105W                 | VMA21         |
| YNL201C                                          | PSY2          | YCR086W                 | CSM1          |
| YNL307C                                          | MCK1          | YER122C                 | GLO3          |
| YNL307C                                          | MCK1          | YJR084W                 | CSN12         |
| YCR002C                                          | CDC10         | YKL101W                 | HSL1          |
| YNL206C                                          | RTT106        | YML016C                 | PPZ1          |
| YER107C                                          | GLE2          | YOL012C                 | HTZ1          |
| YDR320C                                          | SWA2          | YEL042W                 | GDA1          |
| YNL201C                                          | PSY2          | YDL116W                 | NUP84         |
| YLR386W                                          | VAC14         | YOL081W                 | IRA2          |
| YJR032W                                          | CPR7          | YPR046W                 | MCM16         |
| YGL212W                                          | VAM7          | YGL115W                 | SNF4          |
| YLR094C                                          | GIS3          | YMR230W                 | RPS10B        |
| YOR066W                                          | MSA1          | YJR032W                 | CPR7          |
| YBR200W                                          | BEM1          | YNR072W                 | HXT17         |
| YDR137W                                          | RGP1          | YLR315W                 | NKP2          |
| YLR090W                                          | XDJ1          | YLR119W                 | SRN2          |
| YLR337C                                          | VRP1          | YPR046W                 | MCM16         |
| YOL147C                                          | PEX11         | YDL065C                 | PEX19         |
| YDR484W                                          | VPS52         | YLR180W                 | SAM1          |
| YKL025C                                          | PAN3          | YNL166C                 | BNI5          |
| YBR171W                                          | SEC66         | YPR120C                 | CLB5          |
| YMR016C                                          | SOK2          | YBR171W                 | SEC66         |
| YPL024W                                          | RMI1          | YML058W                 | SML1          |
| YKL025C                                          | PAN3          | YPL253C                 | VIK1          |

| Predictions at threshold level 0.75 continued... |               |                         |               |
|--------------------------------------------------|---------------|-------------------------|---------------|
| Gene1 of predicted pair                          |               | Gene2 of predicted pair |               |
| Systematic Name                                  | Standard Name | Systematic Name         | Standard Name |
| YLL022C                                          | HIF1          | YBR009C                 | HHF1          |
| YEL065W                                          | SIT1          | YIL053W                 | RHR2          |
| YPL161C                                          | BEM4          | YNL090W                 | RHO2          |
| YGL161C                                          | YIP5          | YDR289C                 | RTT103        |
| YJL036W                                          | SNX4          | YHR012W                 | VPS29         |
| YJL006C                                          | CTK2          | YGL252C                 | RTG2          |
| YNL297C                                          | MON2          | YNL051W                 | COG5          |
| YHR134W                                          | WSS1          | YBL079W                 | NUP170        |
| YBL078C                                          | ATG8          | YLR396C                 | VPS33         |
| YDR320C                                          | SWA2          | YOR127W                 | RGA1          |
| YOR132W                                          | VPS17         | YDR207C                 | UME6          |
| YMR179W                                          | SPT21         | YLR410W                 | VIP1          |
| YDL185W                                          | TFP1          | YJR033C                 | RAV1          |
| YPR018W                                          | RLF2          | YDL013W                 | SLX5          |
| YNL291C                                          | MID1          | YNL041C                 | COG6          |
| YHL031C                                          | GOS1          | YHR060W                 | VMA22         |
| YOR358W                                          | HAP5          | YJL095W                 | BCK1          |
| YOR001W                                          | RRP6          | YJR135C                 | MCM22         |
| YIL036W                                          | CST6          | YAR014C                 | BUD14         |
| YMR055C                                          | BUB2          | YER161C                 | SPT2          |
| YMR224C                                          | MRE11         | YKL110C                 | KTI12         |
| YDR245W                                          | MNN10         | YBR041W                 | FAT1          |
| YDR443C                                          | SSN2          | YBR173C                 | UMP1          |
| YDR192C                                          | NUP42         | YGL163C                 | RAD54         |
| YLR370C                                          | ARC18         | YNL107W                 | YAF9          |
| YIL156W                                          | UBP7          | YKL117W                 | SBA1          |
| YCL067C                                          | HMLALPHA2     | YCR084C                 | TUP1          |
| YOR195W                                          | SLK19         | YBL047C                 | EDE1          |
| YFR036W                                          | CDC26         | YKL041W                 | VPS24         |

| Predictions at threshold level 0.75 continued... |               |                         |               |
|--------------------------------------------------|---------------|-------------------------|---------------|
| Gene1 of predicted pair                          |               | Gene2 of predicted pair |               |
| Systematic Name                                  | Standard Name | Systematic Name         | Standard Name |
| YER107C                                          | GLE2          | YKR082W                 | NUP133        |
| YML094W                                          | GIM5          | YHR056C                 | RSC30         |
| YJL183W                                          | MNN11         | YEL036C                 | ANP1          |
| YOL044W                                          | PEX15         | YGR077C                 | PEX8          |
| YMR016C                                          | SOK2          | YBR200W                 | BEM1          |
| YER049W                                          | TPA1          | YOR014W                 | RTS1          |
| YGL115W                                          | SNF4          | YPL195W                 | APL5          |
| YMR142C                                          | RPL13B        | YOL121C                 | RPS19A        |
| YMR273C                                          | ZDS1          | YCR053W                 | THR4          |
| YDR137W                                          | RGP1          | YOR308C                 | SNU66         |
| YER001W                                          | MNN1          | YLR370C                 | ARC18         |
| YLL026W                                          | HSP104        | YLR357W                 | RSC2          |
| YMR198W                                          | CIK1          | YKR020W                 | VPS51         |
| YNL032W                                          | SIW14         | YNL087W                 | TCB2          |
| YNL087W                                          | TCB2          | YDR207C                 | UME6          |
| YGL223C                                          | COG1          | YJR040W                 | GEF1          |
| YPL129W                                          | TAF14         | YBL003C                 | HTA2          |
| YBR020W                                          | GAL1          | YGR135W                 | PRE9          |
| YPR051W                                          | MAK3          | YMR055C                 | BUB2          |
| YMR116C                                          | ASC1          | YDR245W                 | MNN10         |
| YPL057C                                          | SUR1          | YOL111C                 | MDY2          |
| YER144C                                          | UBP5          | YJL095W                 | BCK1          |
| YEL053C                                          | MAK10         | YOL018C                 | TLG2          |
| YBL025W                                          | RRN10         | YDR310C                 | SUM1          |
| YNL215W                                          | IES2          | YGL200C                 | EMP24         |
| YNL230C                                          | ELA1          | YCL014W                 | BUD3          |
| YNL206C                                          | RTT106        | YDR363W-A               | SEM1          |
| YJR032W                                          | CPR7          | YJL183W                 | MNN11         |
| YCR065W                                          | HCM1          | YDL047W                 | SIT4          |

| Predictions at threshold level 0.75 continued... |               |                         |               |
|--------------------------------------------------|---------------|-------------------------|---------------|
| Gene1 of predicted pair                          |               | Gene2 of predicted pair |               |
| Systematic Name                                  | Standard Name | Systematic Name         | Standard Name |
| YLR292C                                          | SEC72         | YMR109W                 | MYO5          |
| YKL116C                                          | PRR1          | YMR133W                 | REC114        |
| YJL053W                                          | PEP8          | YPL161C                 | BEM4          |
| YLR095C                                          | IOC2          | YBL103C                 | RTG3          |
| YGL003C                                          | CDH1          | YOR327C                 | SNC2          |
| YML016C                                          | PPZ1          | YNL079C                 | TPM1          |
| YKR057W                                          | RPS21A        | YNL229C                 | URE2          |
| YBR171W                                          | SEC66         | YDR183W                 | PLP1          |
| YLR441C                                          | RPS1A         | YHR060W                 | VMA22         |
| YPL057C                                          | SUR1          | YHR115C                 | DMA1          |
| YJL172W                                          | CPS1          | YPL137C                 | GIP3          |
| YOR001W                                          | RRP6          | YMR038C                 | CCS1          |
| YLR288C                                          | MEC3          | YDR207C                 | UME6          |
| YDR335W                                          | MSN5          | YBL079W                 | NUP170        |
| YMR224C                                          | MRE11         | YJL187C                 | SWE1          |
| YOR332W                                          | VMA4          | YJL095W                 | BCK1          |
| YPR018W                                          | RLF2          | YHR010W                 | RPL27A        |
| YDR480W                                          | DIG2          | YBL016W                 | FUS3          |
| YIL053W                                          | RHR2          | YPL137C                 | GIP3          |
| YBR200W                                          | BEM1          | YJR060W                 | CBF1          |
| YLR148W                                          | PEP3          | YPL195W                 | APL5          |
| YDR225W                                          | HTA1          | YNL206C                 | RTT106        |
| YMR224C                                          | MRE11         | YNL058C                 | YNL058C       |
| YDR103W                                          | STE5          | YDR254W                 | CHL4          |
| YBR127C                                          | VMA2          | YEL051W                 | VMA8          |
| YKR035W-A                                        | DID2          | YPL137C                 | GIP3          |
| YPL161C                                          | BEM4          | YPL256C                 | CLN2          |
| YGR020C                                          | VMA7          | YEL043W                 | YEL043W       |
| YML012W                                          | ERV25         | YML067C                 | ERV41         |



| Predictions at threshold level 0.75 continued... |               |                         |               |
|--------------------------------------------------|---------------|-------------------------|---------------|
| Gene1 of predicted pair                          |               | Gene2 of predicted pair |               |
| Systematic Name                                  | Standard Name | Systematic Name         | Standard Name |
| YLR093C                                          | NYV1          | YOR035C                 | SHE4          |
| YAL010C                                          | MDM10         | YOL054W                 | PSH1          |
| YMR109W                                          | MYO5          | YKL204W                 | EAP1          |
| YGL212W                                          | VAM7          | YLR370C                 | ARC18         |
| YGR270W                                          | YTA7          | YJR032W                 | CPR7          |
| YDR484W                                          | VPS52         | YLR093C                 | NYV1          |
| YOR304W                                          | ISW2          | YJR094C                 | IME1          |
| YOR127W                                          | RGA1          | YJL136C                 | RPS21B        |
| YKL139W                                          | CTK1          | YHR013C                 | ARD1          |
| YEL009C                                          | GCN4          | YGR275W                 | RTT102        |
| YPR184W                                          | GDB1          | YPR119W                 | CLB2          |
| YNL206C                                          | RTT106        | YBR200W                 | BEM1          |
| YCR084C                                          | TUP1          | YPR068C                 | HOS1          |
| YNL288W                                          | CAF40         | YCR086W                 | CSM1          |
| YKL007W                                          | CAP1          | YKR048C                 | NAP1          |
| YLR370C                                          | ARC18         | YHL002W                 | HSE1          |
| YLR386W                                          | VAC14         | YMR016C                 | SOK2          |
| YBL102W                                          | SFT2          | YIL076W                 | SEC28         |
| YGR104C                                          | SRB5          | YEL013W                 | VAC8          |
| YGL212W                                          | VAM7          | YEL013W                 | VAC8          |
| YNR072W                                          | HXT17         | YHR060W                 | VMA22         |
| YCR086W                                          | CSM1          | YAL002W                 | VPS8          |
| YNL107W                                          | YAF9          | YPR032W                 | SRO7          |
| YGL025C                                          | PGD1          | YLR452C                 | SST2          |
| YDR320C                                          | SWA2          | YNR032W                 | PPG1          |
| YBR289W                                          | SNF5          | YLR357W                 | RSC2          |
| YOR270C                                          | VPH1          | YLR093C                 | NYV1          |
| YDR507C                                          | GIN4          | YGL163C                 | RAD54         |
| YFL023W                                          | BUD27         | YPL057C                 | SUR1          |

| Predictions at threshold level 0.75 continued... |               |                         |               |
|--------------------------------------------------|---------------|-------------------------|---------------|
| Gene1 of predicted pair                          |               | Gene2 of predicted pair |               |
| Systematic Name                                  | Standard Name | Systematic Name         | Standard Name |
| YFR010W                                          | UBP6          | YHR077C                 | NMD2          |
| YGL100W                                          | SEH1          | YKL113C                 | RAD27         |
| YOR078W                                          | BUD21         | YBR048W                 | RPS11B        |
| YDL155W                                          | CLB3          | YML028W                 | TSA1          |
| YNL243W                                          | SLA2          | YLR262C                 | YPT6          |
| YNR052C                                          | POP2          | YLR381W                 | CTF3          |
| YBL102W                                          | SFT2          | YML001W                 | YPT7          |
| YDL161W                                          | ENT1          | YLR396C                 | VPS33         |
| YOR038C                                          | HIR2          | YDR440W                 | DOT1          |
| YDL013W                                          | SLX5          | YGL163C                 | RAD54         |
| YEL053C                                          | MAK10         | YGL115W                 | SNF4          |
| YBL103C                                          | RTG3          | YER044C                 | ERG28         |
| YOR275C                                          | RIM20         | YHL027W                 | RIM101        |
| YGL025C                                          | PGD1          | YLR180W                 | SAM1          |
| YBR173C                                          | UMP1          | YEL060C                 | PRB1          |
| YCL001W                                          | RER1          | YMR054W                 | STV1          |
| YPL253C                                          | VIK1          | YEL036C                 | ANP1          |
| YER144C                                          | UBP5          | YMR152W                 | YIM1          |
| YNL325C                                          | FIG4          | YOR035C                 | SHE4          |
| YLR386W                                          | VAC14         | YMR152W                 | YIM1          |
| YCR066W                                          | RAD18         | YCL001W                 | RER1          |
| YEL050C                                          | RML2          | YOR080W                 | DIA2          |
| YER116C                                          | SLX8          | YFL023W                 | BUD27         |
| YDL116W                                          | NUP84         | YFR030W                 | MET10         |
| YLR083C                                          | EMP70         | YDL077C                 | VAM6          |
| YIL076W                                          | SEC28         | YOR038C                 | HIR2          |
| YMR172W                                          | HOT1          | YAR014C                 | BUD14         |
| YCR086W                                          | CSM1          | YGL124C                 | MON1          |
| YOR026W                                          | BUB3          | YNL243W                 | SLA2          |

| Predictions at threshold level 0.75 continued... |               |                         |               |
|--------------------------------------------------|---------------|-------------------------|---------------|
| Gene1 of predicted pair                          |               | Gene2 of predicted pair |               |
| Systematic Name                                  | Standard Name | Systematic Name         | Standard Name |
| YDL080C                                          | THI3          | YHR200W                 | RPN10         |
| YLR313C                                          | SPH1          | YMR038C                 | CCS1          |
| YNL243W                                          | SLA2          | YKR030W                 | GMH1          |
| YKL139W                                          | CTK1          | YNR052C                 | POP2          |
| YOR358W                                          | HAP5          | YMR273C                 | ZDS1          |
| YJL095W                                          | BCK1          | YBR082C                 | UBC4          |
| YJR056C                                          | YJR056C       | YPL195W                 | APL5          |
| YGR054W                                          | YGR054W       | YEL053C                 | MAK10         |
| YML001W                                          | YPT7          | YLR309C                 | IMH1          |
| YCR020C-A                                        | MAK31         | YPR032W                 | SRO7          |
| YML016C                                          | PPZ1          | YDR144C                 | MKC7          |
| YJR032W                                          | CPR7          | YAL002W                 | VPS8          |
| YNL325C                                          | FIG4          | YLR398C                 | SKI2          |
| YBR108W                                          | YBR108W       | YGL115W                 | SNF4          |
| YLR292C                                          | SEC72         | YJL190C                 | RPS22A        |
| YBR274W                                          | CHK1          | YOR038C                 | HIR2          |
| YCR084C                                          | TUP1          | YBR010W                 | HHT1          |
| YDR244W                                          | PEX5          | YDR142C                 | PEX7          |
| YDR137W                                          | RGP1          | YOR035C                 | SHE4          |
| YOR290C                                          | SNF2          | YDL223C                 | HBT1          |
| YLR360W                                          | VPS38         | YHR039C-A               | VMA10         |
| YDR137W                                          | RGP1          | YLR094C                 | GIS3          |
| YJL006C                                          | CTK2          | YGR135W                 | PRE9          |
| YMR026C                                          | PEX12         | YCR053W                 | THR4          |
| YDR108W                                          | GSG1          | YGL174W                 | BUD13         |
| YIR005W                                          | IST3          | YJR050W                 | ISY1          |
| YOR132W                                          | VPS17         | YGR105W                 | VMA21         |
| YDR207C                                          | UME6          | YAL002W                 | VPS8          |
| YEL050C                                          | RML2          | YJR060W                 | CBF1          |

| Predictions at threshold level 0.75 continued... |               |                         |               |
|--------------------------------------------------|---------------|-------------------------|---------------|
| Gene1 of predicted pair                          |               | Gene2 of predicted pair |               |
| Systematic Name                                  | Standard Name | Systematic Name         | Standard Name |
| YKR035W-A                                        | DID2          | YMR230W                 | RPS10B        |
| YFR010W                                          | UBP6          | YKL101W                 | HSL1          |
| YER144C                                          | UBP5          | YFL023W                 | BUD27         |
| YGL033W                                          | HOP2          | YBR200W                 | BEM1          |
| YKR099W                                          | BAS1          | YNR072W                 | HXT17         |
| YOR231W                                          | MKK1          | YLR313C                 | SPH1          |
| YJR032W                                          | CPR7          | YLR350W                 | ORM2          |
| YPR030W                                          | CSR2          | YPL195W                 | APL5          |
| YMR016C                                          | SOK2          | YEL060C                 | PRB1          |
| YOR358W                                          | HAP5          | YML057W                 | CMP2          |
| YLR399C                                          | BDF1          | YNL225C                 | CNM67         |
| YBR215W                                          | HPC2          | YDL226C                 | GCS1          |
| YNL291C                                          | MID1          | YER162C                 | RAD4          |
| YOR304W                                          | ISW2          | YLR182W                 | SWI6          |
| YGL163C                                          | RAD54         | YNL225C                 | CNM67         |
| YPL115C                                          | BEM3          | YMR055C                 | BUB2          |
| YOR312C                                          | RPL20B        | YDR440W                 | DOT1          |
| YBR173C                                          | UMP1          | YNL076W                 | MKS1          |
| YKL116C                                          | PRR1          | YOR035C                 | SHE4          |
| YLR360W                                          | VPS38         | YHR013C                 | ARD1          |
| YBR107C                                          | IML3          | YHR200W                 | RPN10         |
| YLR337C                                          | VRP1          | YML115C                 | VAN1          |
| YBR173C                                          | UMP1          | YOL081W                 | IRA2          |
| YOR039W                                          | CKB2          | YDL006W                 | PTC1          |
| YDR144C                                          | MKC7          | YGL253W                 | HXK2          |
| YEL053C                                          | MAK10         | YDL083C                 | RPS16B        |
| YLR452C                                          | SST2          | YPR119W                 | CLB2          |
| YOR109W                                          | INP53         | YML071C                 | COG8          |
| YDL065C                                          | PEX19         | YPL112C                 | PEX25         |

| Predictions at threshold level 0.75 continued... |               |                         |               |
|--------------------------------------------------|---------------|-------------------------|---------------|
| Gene1 of predicted pair                          |               | Gene2 of predicted pair |               |
| Systematic Name                                  | Standard Name | Systematic Name         | Standard Name |
| YBR200W                                          | BEM1          | YNL058C                 | YNL058C       |
| YOR127W                                          | RGA1          | YGL115W                 | SNF4          |
| YLR148W                                          | PEP3          | YDL077C                 | VAM6          |
| YNL291C                                          | MID1          | YKL101W                 | HSL1          |
| YOR337W                                          | TEA1          | YFL023W                 | BUD27         |
| YER116C                                          | SLX8          | YPL256C                 | CLN2          |
| YAL024C                                          | LTE1          | YBR107C                 | IML3          |
| YGL200C                                          | EMP24         | YLR398C                 | SKI2          |
| YCL032W                                          | STE50         | YLR362W                 | STE11         |
| YDL006W                                          | PTC1          | YPL195W                 | APL5          |
| YPR131C                                          | NAT3          | YDR254W                 | CHL4          |
| YAL024C                                          | LTE1          | YNL032W                 | SIW14         |
| YLR090W                                          | XDJ1          | YER122C                 | GLO3          |
| YBL025W                                          | RRN10         | YEL060C                 | PRB1          |
| YJL006C                                          | CTK2          | YNL225C                 | CNM67         |
| YPR052C                                          | NHP6A         | YGL178W                 | MPT5          |
| YDR101C                                          | ARX1          | YER002W                 | NOP16         |
| YJL176C                                          | SWI3          | YBR289W                 | SNF5          |
| YER144C                                          | UBP5          | YLR452C                 | SST2          |
| YOR337W                                          | TEA1          | YKL139W                 | CTK1          |
| YDR261C                                          | EXG2          | YDR310C                 | SUM1          |
| YJL122W                                          | ALB1          | YHR052W                 | CIC1          |
| YLR094C                                          | GIS3          | YER162C                 | RAD4          |
| YCR086W                                          | CSM1          | YJR090C                 | GRR1          |
| YJL124C                                          | LSM1          | YDL226C                 | GCS1          |
| YLR102C                                          | APC9          | YDR363W-A               | SEM1          |
| YLR381W                                          | CTF3          | YBR107C                 | IML3          |
| YNL307C                                          | MCK1          | YER162C                 | RAD4          |
| YMR153W                                          | NUP53         | YOL081W                 | IRA2          |

| Predictions at threshold level 0.75 continued... |               |                         |               |
|--------------------------------------------------|---------------|-------------------------|---------------|
| Gene1 of predicted pair                          |               | Gene2 of predicted pair |               |
| Systematic Name                                  | Standard Name | Systematic Name         | Standard Name |
| YDR137W                                          | RGP1          | YDR335W                 | MSN5          |
| YBR108W                                          | YBR108W       | YPR051W                 | MAK3          |
| YGR192C                                          | TDH3          | YPR119W                 | CLB2          |
| YMR142C                                          | RPL13B        | YHR039C-A               | VMA10         |
| YLR192C                                          | HCR1          | YML001W                 | YPT7          |
| YLR095C                                          | IOC2          | YJL183W                 | MNN11         |
| YKL032C                                          | IXR1          | YKR048C                 | NAP1          |
| YML016C                                          | PPZ1          | YOR023C                 | AHC1          |
| YBR215W                                          | HPC2          | YDR363W-A               | SEM1          |
| YPR046W                                          | MCM16         | YER040W                 | GLN3          |
| YMR198W                                          | CIK1          | YML071C                 | COG8          |
| YNL307C                                          | MCK1          | YJL183W                 | MNN11         |
| YPR036W                                          | VMA13         | YDR137W                 | RGP1          |
| YJL128C                                          | PBS2          | YDL006W                 | PTC1          |
| YMR167W                                          | MLH1          | YLR350W                 | ORM2          |
| YPL253C                                          | VIK1          | YLR410W                 | VIP1          |
| YDR254W                                          | CHL4          | YJR090C                 | GRR1          |
| YBR020W                                          | GAL1          | YCL011C                 | GBP2          |
| YOL121C                                          | RPS19A        | YGL003C                 | CDH1          |
| YDR245W                                          | MNN10         | YOR038C                 | HIR2          |
| YBR217W                                          | ATG12         | YMR142C                 | RPL13B        |
| YDR443C                                          | SSN2          | YPL161C                 | BEM4          |
| YMR224C                                          | MRE11         | YMR038C                 | CCS1          |
| YGL124C                                          | MON1          | YJL190C                 | RPS22A        |
| YJR032W                                          | CPR7          | YFR036W                 | CDC26         |
| YGR184C                                          | UBR1          | YDR207C                 | UME6          |
| YPL024W                                          | RMI1          | YGL115W                 | SNF4          |
| YHR060W                                          | VMA22         | YDR358W                 | GGA1          |
| YHR200W                                          | RPN10         | YJR060W                 | CBF1          |

| Predictions at threshold level 0.75 continued... |               |                         |               |
|--------------------------------------------------|---------------|-------------------------|---------------|
| Gene1 of predicted pair                          |               | Gene2 of predicted pair |               |
| Systematic Name                                  | Standard Name | Systematic Name         | Standard Name |
| YDL020C                                          | RPN4          | YNL106C                 | INP52         |
| YGL200C                                          | EMP24         | YPL161C                 | BEM4          |
| YFR031C-A                                        | RPL2A         | YMR004W                 | MVP1          |
| YER144C                                          | UBP5          | YOL121C                 | RPS19A        |
| YGR108W                                          | CLB1          | YPR046W                 | MCM16         |
| YPL195W                                          | APL5          | YLR180W                 | SAM1          |
| YOR083W                                          | WHI5          | YNL107W                 | YAF9          |
| YLR061W                                          | RPL22A        | YKR014C                 | YPT52         |
| YGR020C                                          | VMA7          | YDL185W                 | TFP1          |
| YDR335W                                          | MSN5          | YOR368W                 | RAD17         |
| YPL253C                                          | VIK1          | YJR090C                 | GRR1          |
| YFL013C                                          | IES1          | YHR167W                 | THP2          |
| YNL206C                                          | RTT106        | YPL001W                 | HAT1          |
| YOR066W                                          | MSA1          | YDR207C                 | UME6          |
| YLR094C                                          | GIS3          | YHR081W                 | LRP1          |
| YIL076W                                          | SEC28         | YML115C                 | VAN1          |
| YGR249W                                          | MGA1          | YEL053C                 | MAK10         |
| YPL022W                                          | RAD1          | YCR086W                 | CSM1          |
| YKL006W                                          | RPL14A        | YCR077C                 | PAT1          |
| YER143W                                          | DDI1          | YOR327C                 | SNC2          |
| YBR228W                                          | SLX1          | YGL175C                 | SAE2          |
| YGR020C                                          | VMA7          | YHR039C-A               | VMA10         |
| YLR079W                                          | SIC1          | YOL126C                 | MDH2          |
| YOR312C                                          | RPL20B        | YPR120C                 | CLB5          |
| YDL116W                                          | NUP84         | YJR060W                 | CBF1          |
| YNL291C                                          | MID1          | YCR086W                 | CSM1          |
| YPR018W                                          | RLF2          | YGL163C                 | RAD54         |
| YNL032W                                          | SIW14         | YNL076W                 | MKS1          |
| YKL007W                                          | CAP1          | YDR310C                 | SUM1          |

| Predictions at threshold level 0.75 continued... |               |                         |               |
|--------------------------------------------------|---------------|-------------------------|---------------|
| Gene1 of predicted pair                          |               | Gene2 of predicted pair |               |
| Systematic Name                                  | Standard Name | Systematic Name         | Standard Name |
| YBR108W                                          | YBR108W       | YDR254W                 | CHL4          |
| YNL215W                                          | IES2          | YPL129W                 | TAF14         |
| YDR108W                                          | GSG1          | YEL042W                 | GDA1          |
| YOL151W                                          | GRE2          | YPR119W                 | CLB2          |
| YNL054W                                          | VAC7          | YLR410W                 | VIP1          |
| YKR061W                                          | KTR2          | YGL252C                 | RTG2          |
| YER107C                                          | GLE2          | YKL057C                 | NUP120        |
| YFL026W                                          | STE2          | YNR006W                 | VPS27         |
| YPL024W                                          | RMI1          | YGR071C                 | YGR071C       |
| YOR101W                                          | RAS1          | YIL033C                 | BCY1          |
| YBL102W                                          | SFT2          | YEL043W                 | YEL043W       |
| YGL153W                                          | PEX14         | YLR370C                 | ARC18         |
| YOR023C                                          | AHC1          | YJL095W                 | BCK1          |
| YNL079C                                          | TPM1          | YJL183W                 | MNN11         |
| YOR198C                                          | BFR1          | YPR119W                 | CLB2          |
| YFR031C-A                                        | RPL2A         | YMR142C                 | RPL13B        |
| YHR200W                                          | RPN10         | YDR310C                 | SUM1          |
| YLR399C                                          | BDF1          | YFR030W                 | MET10         |
| YLR148W                                          | PEP3          | YKR020W                 | VPS51         |
| YDR448W                                          | ADA2          | YGL025C                 | PGD1          |
| YNL054W                                          | VAC7          | YLR381W                 | CTF3          |
| YML016C                                          | PPZ1          | YJR032W                 | CPR7          |
| YGR019W                                          | UGA1          | YLR386W                 | VAC14         |
| YEL050C                                          | RML2          | YPL253C                 | VIK1          |
| YJL006C                                          | CTK2          | YDL226C                 | GCS1          |
| YHR012W                                          | VPS29         | YNL079C                 | TPM1          |
| YDL020C                                          | RPN4          | YMR231W                 | PEP5          |
| YOR083W                                          | WHI5          | YBR200W                 | BEM1          |
| YLR234W                                          | TOP3          | YDR076W                 | RAD55         |



| Predictions at threshold level 0.75 continued... |               |                         |               |
|--------------------------------------------------|---------------|-------------------------|---------------|
| Gene1 of predicted pair                          |               | Gene2 of predicted pair |               |
| Systematic Name                                  | Standard Name | Systematic Name         | Standard Name |
| YBR173C                                          | UMP1          | YER144C                 | UBP5          |
| YBR030W                                          | YBR030W       | YBL103C                 | RTG3          |
| YHR084W                                          | STE12         | YLR441C                 | RPS1A         |
| YDR156W                                          | RPA14         | YML115C                 | VAN1          |
| YGL078C                                          | DBP3          | YLR370C                 | ARC18         |
| YFL013C                                          | IES1          | YKL160W                 | ELF1          |
| YLR386W                                          | VAC14         | YDR507C                 | GIN4          |
| YBR258C                                          | SHG1          | YGL003C                 | CDH1          |
| YOR127W                                          | RGA1          | YCR086W                 | CSM1          |
| YMR224C                                          | MRE11         | YML102W                 | CAC2          |
| YGR252W                                          | GCN5          | YNL107W                 | YAF9          |
| YKR035W-A                                        | DID2          | YMR214W                 | SCJ1          |
| YLR386W                                          | VAC14         | YPL057C                 | SUR1          |
| YGL087C                                          | MMS2          | YBR107C                 | IML3          |
| YNL215W                                          | IES2          | YER118C                 | SHO1          |
| YOR109W                                          | INP53         | YGL124C                 | MON1          |
| YHR013C                                          | ARD1          | YGL252C                 | RTG2          |
| YDL020C                                          | RPN4          | YKR030W                 | GMH1          |
| YDR254W                                          | CHL4          | YML112W                 | CTK3          |
| YEL065W                                          | SIT1          | YGL066W                 | SGF73         |
| YNL068C                                          | FKH2          | YOR195W                 | SLK19         |
| YBR200W                                          | BEM1          | YDL077C                 | VAM6          |
| YOR195W                                          | SLK19         | YMR179W                 | SPT21         |
| YOR368W                                          | RAD17         | YLR350W                 | ORM2          |
| YOL051W                                          | GAL11         | YNL031C                 | HHT2          |
| YKL126W                                          | YPK1          | YLR370C                 | ARC18         |
| YNL325C                                          | FIG4          | YLR320W                 | MMS22         |
| YAL024C                                          | LTE1          | YFR031C-A               | RPL2A         |
| YPR046W                                          | MCM16         | YHL002W                 | HSE1          |

| Predictions at threshold level 0.75 continued... |               |                         |               |
|--------------------------------------------------|---------------|-------------------------|---------------|
| Gene1 of predicted pair                          |               | Gene2 of predicted pair |               |
| Systematic Name                                  | Standard Name | Systematic Name         | Standard Name |
| YKL048C                                          | ELM1          | YIL008W                 | URM1          |
| YBL021C                                          | HAP3          | YMR055C                 | BUB2          |
| YOR275C                                          | RIM20         | YHR108W                 | GGA2          |
| YKL139W                                          | CTK1          | YNL058C                 | YNL058C       |
| YHL031C                                          | GOS1          | YGR270W                 | YTA7          |
| YDL020C                                          | RPN4          | YHR010W                 | RPL27A        |
| YLR119W                                          | SRN2          | YGL115W                 | SNF4          |
| YOR156C                                          | NFI1          | YNL297C                 | MON2          |
| YCR088W                                          | ABP1          | YKL204W                 | EAP1          |
| YCR065W                                          | HCM1          | YBR036C                 | CSG2          |
| YIL076W                                          | SEC28         | YEL043W                 | YEL043W       |
| YPR120C                                          | CLB5          | YIL103W                 | DPH1          |
| YPL129W                                          | TAF14         | YDR073W                 | SNF11         |
| YBR030W                                          | YBR030W       | YMR230W                 | RPS10B        |
| YDL155W                                          | CLB3          | YOL081W                 | IRA2          |
| YNL041C                                          | COG6          | YOR035C                 | SHE4          |
| YJL058C                                          | BIT61         | YPR119W                 | CLB2          |
| YMR152W                                          | YIM1          | YGL124C                 | MON1          |
| YAL014C                                          | SYN8          | YDR080W                 | VPS41         |
| YPR046W                                          | MCM16         | YGL003C                 | CDH1          |
| YPL022W                                          | RAD1          | YOL030W                 | GAS5          |
| YNL215W                                          | IES2          | YDR363W-A               | SEM1          |
| YJR040W                                          | GEF1          | YJR033C                 | RAV1          |
| YGL163C                                          | RAD54         | YJR135C                 | MCM22         |
| YLR109W                                          | AHP1          | YIL008W                 | URM1          |
| YDR439W                                          | LRS4          | YLR182W                 | SWI6          |
| YGR135W                                          | PRE9          | YPL089C                 | RLM1          |
| YOR023C                                          | AHC1          | YDL155W                 | CLB3          |
| YBL017C                                          | PEP1          | YJL029C                 | VPS53         |

| Predictions at threshold level 0.75 continued... |               |                         |               |
|--------------------------------------------------|---------------|-------------------------|---------------|
| Gene1 of predicted pair                          |               | Gene2 of predicted pair |               |
| Systematic Name                                  | Standard Name | Systematic Name         | Standard Name |
| YLR435W                                          | TSR2          | YJL138C                 | TIF2          |
| YNL206C                                          | RTT106        | YGR188C                 | BUB1          |
| YDR293C                                          | SSD1          | YKL048C                 | ELM1          |
| YER044C                                          | ERG28         | YBR036C                 | CSG2          |
| YBR108W                                          | YBR108W       | YDL223C                 | HBT1          |
| YLR079W                                          | SIC1          | YLR131C                 | ACE2          |
| YJL172W                                          | CPS1          | YPR036W                 | VMA13         |
| YGL147C                                          | RPL9A         | YPL137C                 | GIP3          |
| YPR018W                                          | RLF2          | YBR010W                 | HHT1          |
| YKL006W                                          | RPL14A        | YGL200C                 | EMP24         |
| YPL140C                                          | MKK2          | YPR119W                 | CLB2          |
| YOR195W                                          | SLK19         | YPR046W                 | MCM16         |
| YMR172W                                          | HOT1          | YPR051W                 | MAK3          |
| YBR030W                                          | YBR030W       | YLR371W                 | ROM2          |
| YGL115W                                          | SNF4          | YJR032W                 | CPR7          |
| YHR178W                                          | STB5          | YLR447C                 | VMA6          |
| YNL201C                                          | PSY2          | YDR289C                 | RTT103        |
| YLR079W                                          | SIC1          | YOR080W                 | DIA2          |
| YNL307C                                          | MCK1          | YER040W                 | GLN3          |
| YDL116W                                          | NUP84         | YKR024C                 | DBP7          |
| YPR040W                                          | TIP41         | YDR309C                 | GIC2          |
| YJL154C                                          | VPS35         | YCR066W                 | RAD18         |
| YGR239C                                          | PEX21         | YOL044W                 | PEX15         |
| YFL023W                                          | BUD27         | YMR311C                 | GLC8          |
| YGR209C                                          | TRX2          | YDR423C                 | CAD1          |
| YOR132W                                          | VPS17         | YGR188C                 | BUB1          |
| YJR056C                                          | YJR056C       | YDL083C                 | RPS16B        |
| YPL115C                                          | BEM3          | YDR289C                 | RTT103        |
| YEL053C                                          | MAK10         | YPL120W                 | VPS30         |

| Predictions at threshold level 0.75 continued... |               |                         |               |
|--------------------------------------------------|---------------|-------------------------|---------------|
| Gene1 of predicted pair                          |               | Gene2 of predicted pair |               |
| Systematic Name                                  | Standard Name | Systematic Name         | Standard Name |
| YDR318W                                          | MCM21         | YOL067C                 | RTG1          |
| YEL065W                                          | SIT1          | YLR192C                 | HCR1          |
| YPR052C                                          | NHP6A         | YIL038C                 | NOT3          |
| YNL288W                                          | CAF40         | YPR072W                 | NOT5          |
| YML103C                                          | NUP188        | YML057W                 | CMP2          |
| YNL025C                                          | SSN8          | YGR104C                 | SRB5          |
| YNL218W                                          | MGS1          | YNR052C                 | POP2          |
| YLL039C                                          | UBI4          | YKR020W                 | VPS51         |
| YPR084W                                          | YPR084W       | YML071C                 | COG8          |
| YGR105W                                          | VMA21         | YOR327C                 | SNC2          |
| YAR014C                                          | BUD14         | YGR188C                 | BUB1          |
| YPR036W                                          | VMA13         | YOL111C                 | MDY2          |
| YDL116W                                          | NUP84         | YMR199W                 | CLN1          |
| YDR260C                                          | SWM1          | YMR038C                 | CCS1          |
| YGL212W                                          | VAM7          | YKR035W-A               | DID2          |
| YPL018W                                          | CTF19         | YJL183W                 | MNN11         |
| YBR030W                                          | YBR030W       | YLR093C                 | NYV1          |
| YMR199W                                          | CLN1          | YHR152W                 | SPO12         |
| YLR288C                                          | MEC3          | YDL013W                 | SLX5          |
| YOL111C                                          | MDY2          | YMR311C                 | GLC8          |
| YBL058W                                          | SHP1          | YDR207C                 | UME6          |
| YFR031C-A                                        | RPL2A         | YJR032W                 | CPR7          |
| YNR052C                                          | POP2          | YGR134W                 | CAF130        |
| YGL060W                                          | YBP2          | YGL115W                 | SNF4          |
| YGL033W                                          | HOP2          | YNL076W                 | MKS1          |
| YLL010C                                          | PSR1          | YOR043W                 | WHI2          |
| YDR289C                                          | RTT103        | YHR115C                 | DMA1          |
| YKL116C                                          | PRR1          | YNL307C                 | MCK1          |
| YOR358W                                          | HAP5          | YCR086W                 | CSM1          |

| Predictions at threshold level 0.75 continued... |               |                         |               |
|--------------------------------------------------|---------------|-------------------------|---------------|
| Gene1 of predicted pair                          |               | Gene2 of predicted pair |               |
| Systematic Name                                  | Standard Name | Systematic Name         | Standard Name |
| YLR337C                                          | VRP1          | YJL176C                 | SWI3          |
| YDR137W                                          | RGP1          | YIR005W                 | IST3          |
| YDR245W                                          | MNN10         | YER049W                 | TPA1          |
| YHR060W                                          | VMA22         | YMR214W                 | SCJ1          |
| YJR040W                                          | GEF1          | YHR039C-A               | VMA10         |
| YGL212W                                          | VAM7          | YDR310C                 | SUM1          |
| YBR030W                                          | YBR030W       | YNL041C                 | COG6          |
| YBR019C                                          | GAL10         | YDR207C                 | UME6          |
| YHR039C-A                                        | VMA10         | YJL004C                 | SYS1          |
| YML115C                                          | VAN1          | YMR142C                 | RPL13B        |
| YBR171W                                          | SEC66         | YER122C                 | GLO3          |
| YDR264C                                          | AKR1          | YHR115C                 | DMA1          |
| YMR224C                                          | MRE11         | YCR066W                 | RAD18         |
| YDR146C                                          | SWI5          | YLR371W                 | ROM2          |
| YLR441C                                          | RPS1A         | YER162C                 | RAD4          |
| YNL032W                                          | SIW14         | YEL053C                 | MAK10         |
| YML071C                                          | COG8          | YGL003C                 | CDH1          |
| YPL213W                                          | LEA1          | YGR135W                 | PRE9          |
| YBR194W                                          | SOY1          | YLR398C                 | SKI2          |
| YNR031C                                          | SSK2          | YCR073C                 | SSK22         |
| YIL076W                                          | SEC28         | YOR124C                 | UBP2          |
| YNL054W                                          | VAC7          | YGL163C                 | RAD54         |
| YMR202W                                          | ERG2          | YDL226C                 | GCS1          |
| YDR202C                                          | RAV2          | YGR105W                 | VMA21         |
| YPL057C                                          | SUR1          | YOR035C                 | SHE4          |
| YDR073W                                          | SNF11         | YKL109W                 | HAP4          |
| YDR378C                                          | LSM6          | YNL225C                 | CNM67         |
| YLR234W                                          | TOP3          | YNL135C                 | FPR1          |
| YBL051C                                          | PIN4          | YPR046W                 | MCM16         |

| Predictions at threshold level 0.75 continued... |               |                         |               |
|--------------------------------------------------|---------------|-------------------------|---------------|
| Gene1 of predicted pair                          |               | Gene2 of predicted pair |               |
| Systematic Name                                  | Standard Name | Systematic Name         | Standard Name |
| YHL031C                                          | GOS1          | YMR216C                 | SKY1          |
| YDR171W                                          | HSP42         | YJR060W                 | CBF1          |
| YLR119W                                          | SRN2          | YJR056C                 | YJR056C       |
| YNL291C                                          | MID1          | YLR309C                 | IMH1          |
| YLR234W                                          | TOP3          | YLR313C                 | SPH1          |
| YFR010W                                          | UBP6          | YPR119W                 | CLB2          |
| YKR057W                                          | RPS21A        | YDL047W                 | SIT4          |
| YBL072C                                          | RPS8A         | YEL036C                 | ANP1          |
| YBR126C                                          | TPS1          | YMR109W                 | MYO5          |
| YER162C                                          | RAD4          | YAL002W                 | VPS8          |
| YKL025C                                          | PAN3          | YJL095W                 | BCK1          |
| YGR071C                                          | YGR071C       | YPL079W                 | RPL21B        |
| YMR004W                                          | MVP1          | YAR014C                 | BUD14         |
| YER144C                                          | UBP5          | YJR056C                 | YJR056C       |
| YMR273C                                          | ZDS1          | YHL011C                 | PRS3          |
| YOR337W                                          | TEA1          | YML071C                 | COG8          |
| YLR061W                                          | RPL22A        | YML115C                 | VAN1          |
| YMR231W                                          | PEP5          | YPL256C                 | CLN2          |
| YNL291C                                          | MID1          | YKR001C                 | VPS1          |
| YML016C                                          | PPZ1          | YGL237C                 | HAP2          |
| YGL087C                                          | MMS2          | YJR090C                 | GRR1          |
| YPL253C                                          | VIK1          | YIR005W                 | IST3          |
| YNL243W                                          | SLA2          | YOR069W                 | VPS5          |
| YMR055C                                          | BUB2          | YEL053C                 | MAK10         |
| YOR109W                                          | INP53         | YOL108C                 | INO4          |
| YKL126W                                          | YPK1          | YOR327C                 | SNC2          |
| YHR134W                                          | WSS1          | YIL008W                 | URM1          |
| YML103C                                          | NUP188        | YJL124C                 | LSM1          |
| YGL223C                                          | COG1          | YCR066W                 | RAD18         |

| Predictions at threshold level 0.75 continued... |               |                         |               |
|--------------------------------------------------|---------------|-------------------------|---------------|
| Gene1 of predicted pair                          |               | Gene2 of predicted pair |               |
| Systematic Name                                  | Standard Name | Systematic Name         | Standard Name |
| YNL243W                                          | SLA2          | YPR046W                 | MCM16         |
| YCR034W                                          | FEN1          | YHR195W                 | NVJ1          |
| YNL297C                                          | MON2          | YOR368W                 | RAD17         |
| YPL024W                                          | RMI1          | YBR195C                 | MSI1          |
| YML117W                                          | NAB6          | YDR245W                 | MNN10         |
| YGL174W                                          | BUD13         | YIR005W                 | IST3          |
| YDR484W                                          | VPS52         | YJR056C                 | YJR056C       |
| YFR010W                                          | UBP6          | YML001W                 | YPT7          |
| YJR060W                                          | CBF1          | YJR005W                 | APL1          |
| YDR484W                                          | VPS52         | YPR030W                 | CSR2          |
| YPL045W                                          | VPS16         | YDR323C                 | PEP7          |
| YLL039C                                          | UBI4          | YEL036C                 | ANP1          |
| YMR205C                                          | PFK2          | YBR082C                 | UBC4          |
| YMR039C                                          | SUB1          | YCR086W                 | CSM1          |
| YDR439W                                          | LRS4          | YBR107C                 | IML3          |
| YNL236W                                          | SIN4          | YNL079C                 | TPM1          |
| YAL024C                                          | LTE1          | YER040W                 | GLN3          |
| YKL139W                                          | CTK1          | YMR153W                 | NUP53         |
| YKL025C                                          | PAN3          | YLR447C                 | VMA6          |
| YGL078C                                          | DBP3          | YML001W                 | YPT7          |
| YFR031C-A                                        | RPL2A         | YMR216C                 | SKY1          |
| YKR001C                                          | VPS1          | YNR032W                 | PPG1          |
| YBR057C                                          | MUM2          | YHR200W                 | RPN10         |
| YER110C                                          | KAP123        | YDR144C                 | MKC7          |
| YAL024C                                          | LTE1          | YIL103W                 | DPH1          |
| YER161C                                          | SPT2          | YOR308C                 | SNU66         |
| YOR127W                                          | RGA1          | YER120W                 | SCS2          |
| YMR201C                                          | RAD14         | YJR052W                 | RAD7          |
| YGL078C                                          | DBP3          | YDR137W                 | RGP1          |

| Predictions at threshold level 0.75 continued... |               |                         |               |
|--------------------------------------------------|---------------|-------------------------|---------------|
| Gene1 of predicted pair                          |               | Gene2 of predicted pair |               |
| Systematic Name                                  | Standard Name | Systematic Name         | Standard Name |
| YDL160C                                          | DHH1          | YML109W                 | ZDS2          |
| YNL058C                                          | YNL058C       | YLR452C                 | SST2          |
| YOR337W                                          | TEA1          | YPL195W                 | APL5          |
| YJL124C                                          | LSM1          | YPL018W                 | CTF19         |
| YKR059W                                          | TIF1          | YCR031C                 | RPS14A        |
| YPL253C                                          | VIK1          | YBR260C                 | RGD1          |
| YDR363W-A                                        | SEM1          | YKL041W                 | VPS24         |
| YAL024C                                          | LTE1          | YDL184C                 | RPL41A        |
| YLR433C                                          | CNA1          | YBR114W                 | RAD16         |
| YGR081C                                          | SLX9          | YDR076W                 | RAD55         |
| YLR357W                                          | RSC2          | YOR064C                 | YNG1          |
| YMR109W                                          | MYO5          | YOR035C                 | SHE4          |
| YPL161C                                          | BEM4          | YGR135W                 | PRE9          |
| YPL161C                                          | BEM4          | YHR114W                 | BZZ1          |
| YER044C                                          | ERG28         | YNL041C                 | COG6          |
| YLR095C                                          | IOC2          | YDL077C                 | VAM6          |
| YLR398C                                          | SKI2          | YBR036C                 | CSG2          |
| YPL057C                                          | SUR1          | YLR180W                 | SAM1          |
| YOR080W                                          | DIA2          | YDR385W                 | EFT2          |
| YKL117W                                          | SBA1          | YPL256C                 | CLN2          |
| YDR443C                                          | SSN2          | YFL023W                 | BUD27         |
| YMR133W                                          | REC114        | YDR207C                 | UME6          |
| YDL020C                                          | RPN4          | YLR447C                 | VMA6          |
| YIL034C                                          | CAP2          | YNL107W                 | YAF9          |
| YCL001W                                          | RER1          | YAR014C                 | BUD14         |
| YJL172W                                          | CPS1          | YPL057C                 | SUR1          |
| YBR057C                                          | MUM2          | YMR089C                 | YTA12         |
| YHR060W                                          | VMA22         | YER040W                 | GLN3          |
| YGL178W                                          | MPT5          | YOL051W                 | GAL11         |



| Predictions at threshold level 0.75 continued... |               |                         |               |
|--------------------------------------------------|---------------|-------------------------|---------------|
| Gene1 of predicted pair                          |               | Gene2 of predicted pair |               |
| Systematic Name                                  | Standard Name | Systematic Name         | Standard Name |
| YLR303W                                          | MET17         | YLR377C                 | FBP1          |
| YDL083C                                          | RPS16B        | YLR371W                 | ROM2          |
| YKR099W                                          | BAS1          | YHR200W                 | RPN10         |
| YPR029C                                          | APL4          | YPR119W                 | CLB2          |
| YPL129W                                          | TAF14         | YKL129C                 | MYO3          |
| YLR234W                                          | TOP3          | YNL107W                 | YAF9          |
| YML038C                                          | YMD8          | YNL051W                 | COG5          |
| YML103C                                          | NUP188        | YJR060W                 | CBF1          |
| YGR108W                                          | CLB1          | YKL048C                 | ELM1          |
| YBR130C                                          | SHE3          | YKL185W                 | ASH1          |
| YPR036W                                          | VMA13         | YOL081W                 | IRA2          |
| YGR241C                                          | YAP1802       | YOR035C                 | SHE4          |
| YEL053C                                          | MAK10         | YDR310C                 | SUM1          |
| YDL020C                                          | RPN4          | YKL041W                 | VPS24         |
| YGL147C                                          | RPL9A         | YOR035C                 | SHE4          |
| YJL154C                                          | VPS35         | YKR001C                 | VPS1          |
| YGL151W                                          | NUT1          | YGL148W                 | ARO2          |
| YLR148W                                          | PEP3          | YDR080W                 | VPS41         |
| YDR202C                                          | RAV2          | YDL006W                 | PTC1          |
| YMR142C                                          | RPL13B        | YER116C                 | SLX8          |
| YLR386W                                          | VAC14         | YLR452C                 | SST2          |
| YGL115W                                          | SNF4          | YOR035C                 | SHE4          |
| YKL139W                                          | CTK1          | YLR398C                 | SKI2          |
| YPR036W                                          | VMA13         | YER139C                 | YER139C       |
| YJL210W                                          | PEX2          | YGL153W                 | PEX14         |
| YFR024C-A                                        | LSB3          | YPL246C                 | RBD2          |
| YKR101W                                          | SIR1          | YMR273C                 | ZDS1          |
| YMR198W                                          | CIK1          | YDR200C                 | VPS64         |
| YIL159W                                          | BNR1          | YBR126C                 | TPS1          |

| Predictions at threshold level 0.75 continued... |               |                         |               |
|--------------------------------------------------|---------------|-------------------------|---------------|
| Gene1 of predicted pair                          |               | Gene2 of predicted pair |               |
| Systematic Name                                  | Standard Name | Systematic Name         | Standard Name |
| YLR102C                                          | APC9          | YBR195C                 | MSI1          |
| YHR156C                                          | LIN1          | YPR046W                 | MCM16         |
| YER161C                                          | SPT2          | YCR086W                 | CSM1          |
| YBR270C                                          | BIT2          | YJL058C                 | BIT61         |
| YPR084W                                          | YPR084W       | YEL013W                 | VAC8          |
| YBR228W                                          | SLX1          | YNR052C                 | POP2          |
| YOR284W                                          | HUA2          | YMR253C                 | YMR253C       |
| YBR030W                                          | YBR030W       | YDL184C                 | RPL41A        |
| YMR095C                                          | SNO1          | YNL087W                 | TCB2          |
| YDL127W                                          | PCL2          | YJL124C                 | LSM1          |
| YDR320C                                          | SWA2          | YPL195W                 | APL5          |
| YLR360W                                          | VPS38         | YIL008W                 | URM1          |
| YBL047C                                          | EDE1          | YDR440W                 | DOT1          |
| YNL087W                                          | TCB2          | YBR200W                 | BEM1          |
| YJL190C                                          | RPS22A        | YAR014C                 | BUD14         |
| YHR178W                                          | STB5          | YML115C                 | VAN1          |
| YDR425W                                          | SNX41         | YJL036W                 | SNX4          |
| YDR137W                                          | RGP1          | YLR452C                 | SST2          |
| YOL111C                                          | MDY2          | YER139C                 | YER139C       |
| YLR288C                                          | MEC3          | YJR084W                 | CSN12         |
| YKL139W                                          | CTK1          | YNL107W                 | YAF9          |
| YNL079C                                          | TPM1          | YDR207C                 | UME6          |
| YGL223C                                          | COG1          | YJR060W                 | CBF1          |
| YMR016C                                          | SOK2          | YDR261C                 | EXG2          |
| YHL031C                                          | GOS1          | YJR032W                 | CPR7          |
| YGL066W                                          | SGF73         | YDR207C                 | UME6          |
| YML115C                                          | VAN1          | YHL002W                 | HSE1          |
| YDR379W                                          | RGA2          | YDR264C                 | AKR1          |
| YNL054W                                          | VAC7          | YOL054W                 | PSH1          |

| Predictions at threshold level 0.75 continued... |               |                         |               |
|--------------------------------------------------|---------------|-------------------------|---------------|
| Gene1 of predicted pair                          |               | Gene2 of predicted pair |               |
| Systematic Name                                  | Standard Name | Systematic Name         | Standard Name |
| YJR033C                                          | RAV1          | YER122C                 | GLO3          |
| YCR077C                                          | PAT1          | YOL081W                 | IRA2          |
| YHR156C                                          | LIN1          | YDR310C                 | SUM1          |
| YJL124C                                          | LSM1          | YCR077C                 | PAT1          |
| YGR241C                                          | YAP1802       | YJL154C                 | VPS35         |
| YDR490C                                          | PKH1          | YPR119W                 | CLB2          |
| YBR200W                                          | BEM1          | YBR131W                 | CCZ1          |
| YGR184C                                          | UBR1          | YOR368W                 | RAD17         |
| YJR135C                                          | MCM22         | YML112W                 | CTK3          |
| YLR441C                                          | RPS1A         | YLR371W                 | ROM2          |
| YGL060W                                          | YBP2          | YNL107W                 | YAF9          |
| YPR131C                                          | NAT3          | YMR055C                 | BUB2          |
| YDR448W                                          | ADA2          | YIL038C                 | NOT3          |
| YDL184C                                          | RPL41A        | YBR019C                 | GAL10         |
| YPL037C                                          | EGD1          | YLR320W                 | MMS22         |
| YDR320C                                          | SWA2          | YGR020C                 | VMA7          |
| YOL082W                                          | ATG19         | YKL103C                 | LAP4          |
| YEL022W                                          | GEA2          | YER122C                 | GLO3          |
| YJL089W                                          | SIP4          | YER027C                 | GAL83         |
| YAL010C                                          | MDM10         | YFR030W                 | MET10         |
| YNR052C                                          | POP2          | YOR368W                 | RAD17         |
| YKL139W                                          | CTK1          | YDL192W                 | ARF1          |
| YNL291C                                          | MID1          | YOR195W                 | SLK19         |
| YMR219W                                          | ESC1          | YPR119W                 | CLB2          |
| YKL139W                                          | CTK1          | YHR167W                 | THP2          |
| YCR077C                                          | PAT1          | YMR038C                 | CCS1          |
| YBR200W                                          | BEM1          | YBL087C                 | RPL23A        |
| YOR270C                                          | VPH1          | YOL111C                 | MDY2          |
| YDR448W                                          | ADA2          | YJL140W                 | RPB4          |

| Predictions at threshold level 0.75 continued... |               |                         |               |
|--------------------------------------------------|---------------|-------------------------|---------------|
| Gene1 of predicted pair                          |               | Gene2 of predicted pair |               |
| Systematic Name                                  | Standard Name | Systematic Name         | Standard Name |
| YMR172W                                          | HOT1          | YGR188C                 | BUB1          |
| YPL024W                                          | RMI1          | YGL148W                 | ARO2          |
| YOR191W                                          | RIS1          | YJR140C                 | HIR3          |
| YBR215W                                          | HPC2          | YGR270W                 | YTA7          |
| YER162C                                          | RAD4          | YGL003C                 | CDH1          |
| YHL022C                                          | SPO11         | YGL003C                 | CDH1          |
| YNL243W                                          | SLA2          | YOL018C                 | TLG2          |
| YNL291C                                          | MID1          | YGL054C                 | ERV14         |
| YDR137W                                          | RGP1          | YPL195W                 | APL5          |
| YMR179W                                          | SPT21         | YDR378C                 | LSM6          |
| YBL027W                                          | RPL19B        | YMR055C                 | BUB2          |
| YOR112W                                          | CEX1          | YDR207C                 | UME6          |
| YMR026C                                          | PEX12         | YMR016C                 | SOK2          |
| YDR363W-A                                        | SEM1          | YJR135C                 | MCM22         |
| YOR132W                                          | VPS17         | YGL054C                 | ERV14         |
| YIL076W                                          | SEC28         | YNR072W                 | HXT17         |
| YLR079W                                          | SIC1          | YLR410W                 | VIP1          |
| YHR056C                                          | RSC30         | YLR200W                 | YKE2          |
| YML117W                                          | NAB6          | YBR041W                 | FAT1          |
| YPL161C                                          | BEM4          | YHL020C                 | OPI1          |
| YLR095C                                          | IOC2          | YJR032W                 | CPR7          |
| YHR134W                                          | WSS1          | YBR108W                 | YBR108W       |
| YER162C                                          | RAD4          | YJL183W                 | MNN11         |
| YGL133W                                          | ITC1          | YMR199W                 | CLN1          |
| YGR135W                                          | PRE9          | YBR082C                 | UBC4          |
| YLR360W                                          | VPS38         | YPL045W                 | VPS16         |
| YMR055C                                          | BUB2          | YJL095W                 | BCK1          |
| YLR337C                                          | VRP1          | YIL130W                 | ASG1          |
| YGL212W                                          | VAM7          | YBL025W                 | RRN10         |

| Predictions at threshold level 0.75 continued... |               |                         |               |
|--------------------------------------------------|---------------|-------------------------|---------------|
| Gene1 of predicted pair                          |               | Gene2 of predicted pair |               |
| Systematic Name                                  | Standard Name | Systematic Name         | Standard Name |
| YHR111W                                          | UBA4          | YPL152W                 | RRD2          |
| YOR195W                                          | SLK19         | YDR335W                 | MSN5          |
| YKL007W                                          | CAP1          | YIR003W                 | YIR003W       |
| YDR484W                                          | VPS52         | YKR020W                 | VPS51         |
| YNR072W                                          | HXT17         | YMR311C                 | GLC8          |
| YIL053W                                          | RHR2          | YKR035W-A               | DID2          |
| YDR378C                                          | LSM6          | YDL047W                 | SIT4          |
| YNL307C                                          | MCK1          | YDR363W-A               | SEM1          |
| YMR142C                                          | RPL13B        | YML071C                 | COG8          |
| YPL022W                                          | RAD1          | YHR200W                 | RPN10         |
| YDR261C                                          | EXG2          | YDL192W                 | ARF1          |
| YDR383C                                          | NKP1          | YCR086W                 | CSM1          |
| YCR065W                                          | HCM1          | YNL107W                 | YAF9          |
| YNL297C                                          | MON2          | YML028W                 | TSA1          |
| YGL133W                                          | ITC1          | YKR057W                 | RPS21A        |
| YFL023W                                          | BUD27         | YBR215W                 | HPC2          |
| YGR261C                                          | APL6          | YER120W                 | SCS2          |
| YGL115W                                          | SNF4          | YOL121C                 | RPS19A        |
| YMR095C                                          | SNO1          | YLR371W                 | ROM2          |
| YPL195W                                          | APL5          | YJR033C                 | RAV1          |
| YJR135C                                          | MCM22         | YBR114W                 | RAD16         |
| YLR119W                                          | SRN2          | YPL195W                 | APL5          |
| YLL007C                                          | YLL007C       | YLR292C                 | SEC72         |
| YGL250W                                          | RMR1          | YOR368W                 | RAD17         |
| YJR040W                                          | GEF1          | YOL108C                 | INO4          |
| YFR031C-A                                        | RPL2A         | YNL238W                 | KEX2          |
| YDR202C                                          | RAV2          | YCL037C                 | SRO9          |
| YHR134W                                          | WSS1          | YJL190C                 | RPS22A        |
| YPL240C                                          | HSP82         | YER074W-A               | YOS1          |

| Predictions at threshold level 0.75 continued... |               |                         |               |
|--------------------------------------------------|---------------|-------------------------|---------------|
| Gene1 of predicted pair                          |               | Gene2 of predicted pair |               |
| Systematic Name                                  | Standard Name | Systematic Name         | Standard Name |
| YKL048C                                          | ELM1          | YBR114W                 | RAD16         |
| YOR106W                                          | VAM3          | YKR001C                 | VPS1          |
| YBR084C-A                                        | RPL19A        | YNL116W                 | DMA2          |
| YFR010W                                          | UBP6          | YGL212W                 | VAM7          |
| YOR275C                                          | RIM20         | YPR173C                 | VPS4          |
| YER116C                                          | SLX8          | YOL090W                 | MSH2          |
| YCR031C                                          | RPS14A        | YOR368W                 | RAD17         |
| YFR010W                                          | UBP6          | YKL048C                 | ELM1          |
| YJL124C                                          | LSM1          | YCR086W                 | CSM1          |
| YFR010W                                          | UBP6          | YAR014C                 | BUD14         |
| YBR030W                                          | YBR030W       | YBR171W                 | SEC66         |
| YBL058W                                          | SHP1          | YML001W                 | YPT7          |
| YJR140C                                          | HIR3          | YOR039W                 | CKB2          |
| YJL154C                                          | VPS35         | YGR270W                 | YTA7          |
| YPL057C                                          | SUR1          | YPL018W                 | CTF19         |
| YJL060W                                          | BNA3          | YLR370C                 | ARC18         |
| YGL003C                                          | CDH1          | YNL076W                 | MKS1          |
| YPR173C                                          | VPS4          | YOL018C                 | TLG2          |
| YGR108W                                          | CLB1          | YJL190C                 | RPS22A        |
| YIL076W                                          | SEC28         | YCR066W                 | RAD18         |
| YNL087W                                          | TCB2          | YPL137C                 | GIP3          |
| YKR057W                                          | RPS21A        | YDR379W                 | RGA2          |
| YBL025W                                          | RRN10         | YDL077C                 | VAM6          |
| YDR245W                                          | MNN10         | YLR320W                 | MMS22         |
| YDR080W                                          | VPS41         | YER122C                 | GLO3          |
| YOR132W                                          | VPS17         | YPL253C                 | VIK1          |
| YNL243W                                          | SLA2          | YGR200C                 | ELP2          |
| YMR133W                                          | REC114        | YNL076W                 | MKS1          |
| YMR216C                                          | SKY1          | YML071C                 | COG8          |

| Predictions at threshold level 0.75 continued... |               |                         |               |
|--------------------------------------------------|---------------|-------------------------|---------------|
| Gene1 of predicted pair                          |               | Gene2 of predicted pair |               |
| Systematic Name                                  | Standard Name | Systematic Name         | Standard Name |
| YPL057C                                          | SUR1          | YLR032W                 | RAD5          |
| YOR270C                                          | VPH1          | YFR036W                 | CDC26         |
| YJL004C                                          | SYS1          | YGL124C                 | MON1          |
| YDL116W                                          | NUP84         | YBR215W                 | HPC2          |
| YLR083C                                          | EMP70         | YCL001W                 | RER1          |
| YLR234W                                          | TOP3          | YJL124C                 | LSM1          |
| YDR335W                                          | MSN5          | YNL116W                 | DMA2          |
| YPR036W                                          | VMA13         | YOR035C                 | SHE4          |
| YGR040W                                          | KSS1          | YDR480W                 | DIG2          |
| YMR026C                                          | PEX12         | YGL115W                 | SNF4          |
| YPR131C                                          | NAT3          | YLR234W                 | TOP3          |
| YML115C                                          | VAN1          | YPL096C-A               | ERI1          |
| YFR032C-A                                        | RPL29         | YBR041W                 | FAT1          |
| YLR119W                                          | SRN2          | YMR230W                 | RPS10B        |
| YKL032C                                          | IXR1          | YDR289C                 | RTT103        |
| YBL008W                                          | HIR1          | YPL001W                 | HAT1          |
| YIR005W                                          | IST3          | YIL103W                 | DPH1          |
| YPL234C                                          | TFP3          | YDR153C                 | ENT5          |
| YER174C                                          | GRX4          | YFR030W                 | MET10         |
| YEL044W                                          | IES6          | YEL036C                 | ANP1          |
| YPL024W                                          | RMI1          | YGR249W                 | MGA1          |
| YCL001W                                          | RER1          | YEL051W                 | VMA8          |
| YMR092C                                          | AIP1          | YOR035C                 | SHE4          |
| YHR193C                                          | EGD2          | YPL037C                 | EGD1          |
| YDR245W                                          | MNN10         | YKL161C                 | YKL161C       |
| YMR016C                                          | SOK2          | YDR358W                 | GGA1          |
| YGR105W                                          | VMA21         | YDR207C                 | UME6          |
| YPL057C                                          | SUR1          | YDR254W                 | CHL4          |
| YNL206C                                          | RTT106        | YNL031C                 | HHT2          |

| Predictions at threshold level 0.75 continued... |               |                         |               |
|--------------------------------------------------|---------------|-------------------------|---------------|
| Gene1 of predicted pair                          |               | Gene2 of predicted pair |               |
| Systematic Name                                  | Standard Name | Systematic Name         | Standard Name |
| YOR270C                                          | VPH1          | YJR056C                 | YJR056C       |
| YLR360W                                          | VPS38         | YPL253C                 | VIK1          |
| YJR040W                                          | GEF1          | YML038C                 | YMD8          |
| YDR477W                                          | SNF1          | YMR311C                 | GLC8          |
| YMR198W                                          | CIK1          | YGL161C                 | YIP5          |
| YEL044W                                          | IES6          | YOR312C                 | RPL20B        |
| YGR241C                                          | YAP1802       | YMR231W                 | PEP5          |
| YGR261C                                          | APL6          | YEL043W                 | YEL043W       |
| YML115C                                          | VAN1          | YDR245W                 | MNN10         |
| YJR032W                                          | CPR7          | YAR014C                 | BUD14         |
| YBR200W                                          | BEM1          | YPR040W                 | TIP41         |
| YHR178W                                          | STB5          | YMR109W                 | MYO5          |
| YLR150W                                          | STM1          | YPL018W                 | CTF19         |
| YDR244W                                          | PEX5          | YIL160C                 | POT1          |
| YMR026C                                          | PEX12         | YOR290C                 | SNF2          |
| YIL034C                                          | CAP2          | YLR337C                 | VRP1          |
| YER102W                                          | RPS8B         | YBL072C                 | RPS8A         |
| YLR248W                                          | RCK2          | YMR243C                 | ZRC1          |
| YDR153C                                          | ENT5          | YKR030W                 | GMH1          |
| YOL145C                                          | CTR9          | YGL003C                 | CDH1          |
| YDR443C                                          | SSN2          | YPR046W                 | MCM16         |
| YJL154C                                          | VPS35         | YHR205W                 | SCH9          |
| YML028W                                          | TSA1          | YOR014W                 | RTS1          |
| YLR095C                                          | IOC2          | YKR099W                 | BAS1          |
| YFR031C-A                                        | RPL2A         | YML071C                 | COG8          |
| YGL087C                                          | MMS2          | YDR254W                 | CHL4          |
| YNL325C                                          | FIG4          | YPL037C                 | EGD1          |
| YNL041C                                          | COG6          | YJR033C                 | RAV1          |
| YLR090W                                          | XDJ1          | YMR095C                 | SNO1          |



| Predictions at threshold level 0.75 continued... |               |                         |               |
|--------------------------------------------------|---------------|-------------------------|---------------|
| Gene1 of predicted pair                          |               | Gene2 of predicted pair |               |
| Systematic Name                                  | Standard Name | Systematic Name         | Standard Name |
| YMR159C                                          | ATG16         | YPL149W                 | ATG5          |
| YBL088C                                          | TEL1          | YDL059C                 | RAD59         |
| YNL079C                                          | TPM1          | YMR311C                 | GLC8          |
| YBR278W                                          | DPB3          | YEL056W                 | HAT2          |
| YKR014C                                          | YPT52         | YAL002W                 | VPS8          |
| YHR060W                                          | VMA22         | YMR152W                 | YIM1          |
| YDL116W                                          | NUP84         | YDR439W                 | LRS4          |
| YNL215W                                          | IES2          | YDR378C                 | LSM6          |
| YDL223C                                          | HBT1          | YOL081W                 | IRA2          |
| YBR107C                                          | IML3          | YFR036W                 | CDC26         |
| YNL201C                                          | PSY2          | YOR195W                 | SLK19         |
| YHR013C                                          | ARD1          | YPL152W                 | RRD2          |
| YKL025C                                          | PAN3          | YJL190C                 | RPS22A        |
| YPL161C                                          | BEM4          | YGL003C                 | CDH1          |
| YKL139W                                          | CTK1          | YLR182W                 | SWI6          |
| YBR030W                                          | YBR030W       | YLR094C                 | GIS3          |
| YKL048C                                          | ELM1          | YJL183W                 | MNN11         |
| YOR106W                                          | VAM3          | YPL256C                 | CLN2          |
| YNL215W                                          | IES2          | YMR055C                 | BUB2          |
| YMR055C                                          | BUB2          | YJL183W                 | MNN11         |
| YJR059W                                          | PTK2          | YPL178W                 | CBC2          |
| YDR439W                                          | LRS4          | YFR036W                 | CDC26         |
| YKR072C                                          | SIS2          | YBL079W                 | NUP170        |
| YMR016C                                          | SOK2          | YLR180W                 | SAM1          |
| YDR443C                                          | SSN2          | YGR252W                 | GCN5          |
| YER139C                                          | YER139C       | YML097C                 | VPS9          |
| YJL154C                                          | VPS35         | YCR086W                 | CSM1          |
| YCL027W                                          | FUS1          | YNL293W                 | MSB3          |
| YPL024W                                          | RMI1          | YOR038C                 | HIR2          |

| Predictions at threshold level 0.75 continued... |               |                         |               |
|--------------------------------------------------|---------------|-------------------------|---------------|
| Gene1 of predicted pair                          |               | Gene2 of predicted pair |               |
| Systematic Name                                  | Standard Name | Systematic Name         | Standard Name |
| YOR127W                                          | RGA1          | YKL048C                 | ELM1          |
| YOR112W                                          | CEX1          | YEL043W                 | YEL043W       |
| YMR164C                                          | MSS11         | YGR059W                 | SPR3          |
| YJR140C                                          | HIR3          | YBR274W                 | CHK1          |
| YGL087C                                          | MMS2          | YCR086W                 | CSM1          |
| YDL083C                                          | RPS16B        | YPL195W                 | APL5          |
| YMR095C                                          | SNO1          | YER139C                 | YER139C       |
| YPR046W                                          | MCM16         | YBR114W                 | RAD16         |
| YIL159W                                          | BNR1          | YKR020W                 | VPS51         |
| YLR398C                                          | SKI2          | YDR310C                 | SUM1          |
| YMR224C                                          | MRE11         | YHR010W                 | RPL27A        |
| YBR127C                                          | VMA2          | YAL030W                 | SNC1          |
| YBL103C                                          | RTG3          | YMR133W                 | REC114        |
| YMR133W                                          | REC114        | YPL137C                 | GIP3          |
| YJL060W                                          | BNA3          | YJR005W                 | APL1          |
| YEL065W                                          | SIT1          | YDL223C                 | HBT1          |
| YKR035W-A                                        | DID2          | YGL115W                 | SNF4          |
| YLR370C                                          | ARC18         | YMR214W                 | SCJ1          |
| YOR115C                                          | TRS33         | YEL022W                 | GEA2          |
| YJL154C                                          | VPS35         | YDR108W                 | GSG1          |
| YOR127W                                          | RGA1          | YER162C                 | RAD4          |
| YFR010W                                          | UBP6          | YDR310C                 | SUM1          |
| YDR004W                                          | RAD57         | YOR368W                 | RAD17         |
| YBR108W                                          | YBR108W       | YLR441C                 | RPS1A         |
| YOR127W                                          | RGA1          | YGL031C                 | RPL24A        |
| YMR250W                                          | GAD1          | YJL124C                 | LSM1          |
| YDR293C                                          | SSD1          | YBR114W                 | RAD16         |
| YER116C                                          | SLX8          | YER122C                 | GLO3          |
| YPL240C                                          | HSP82         | YER180C-A               | SLO1          |

| Predictions at threshold level 0.75 continued... |               |                         |               |
|--------------------------------------------------|---------------|-------------------------|---------------|
| Gene1 of predicted pair                          |               | Gene2 of predicted pair |               |
| Systematic Name                                  | Standard Name | Systematic Name         | Standard Name |
| YML103C                                          | NUP188        | YLR399C                 | BDF1          |
| YNL293W                                          | MSB3          | YPL256C                 | CLN2          |
| YBR171W                                          | SEC66         | YCL001W                 | RER1          |
| YNL069C                                          | RPL16B        | YML038C                 | YMD8          |
| YDL160C                                          | DHH1          | YMR273C                 | ZDS1          |
| YPR018W                                          | RLF2          | YBR057C                 | MUM2          |
| YBR217W                                          | ATG12         | YOL081W                 | IRA2          |
| YJR058C                                          | APS2          | YOR036W                 | PEP12         |
| YDL160C                                          | DHH1          | YDR071C                 | PAA1          |
| YFR036W                                          | CDC26         | YHR115C                 | DMA1          |
| YOR043W                                          | WHI2          | YDR310C                 | SUM1          |
| YBR020W                                          | GAL1          | YPL248C                 | GAL4          |
| YGR249W                                          | MGA1          | YHR200W                 | RPN10         |
| YBR171W                                          | SEC66         | YHR108W                 | GGA2          |
| YNL236W                                          | SIN4          | YBR089C-A               | NHP6B         |
| YKL048C                                          | ELM1          | YPL018W                 | CTF19         |
| YBR217W                                          | ATG12         | YNL238W                 | KEX2          |
| YKL139W                                          | CTK1          | YOR035C                 | SHE4          |
| YOR023C                                          | AHC1          | YAL002W                 | VPS8          |
| YEL051W                                          | VMA8          | YOL108C                 | INO4          |
| YML001W                                          | YPT7          | YNR032W                 | PPG1          |
| YDL116W                                          | NUP84         | YMR224C                 | MRE11         |
| YOR337W                                          | TEA1          | YOL111C                 | MDY2          |
| YBL051C                                          | PIN4          | YAR014C                 | BUD14         |
| YOR032C                                          | HMS1          | YCR077C                 | PAT1          |
| YPL018W                                          | CTF19         | YOL054W                 | PSH1          |
| YPL256C                                          | CLN2          | YLR352W                 | YLR352W       |
| YHR013C                                          | ARD1          | YNL236W                 | SIN4          |
| YLR399C                                          | BDF1          | YIR005W                 | IST3          |

| Predictions at threshold level 0.75 continued... |               |                         |               |
|--------------------------------------------------|---------------|-------------------------|---------------|
| Gene1 of predicted pair                          |               | Gene2 of predicted pair |               |
| Systematic Name                                  | Standard Name | Systematic Name         | Standard Name |
| YDL184C                                          | RPL41A        | YNL238W                 | KEX2          |
| YJR024C                                          | MDE1          | YCR024C-A               | PMP1          |
| YDR108W                                          | GSG1          | YER162C                 | RAD4          |
| YPL050C                                          | MNN9          | YNL049C                 | SFB2          |
| YKR001C                                          | VPS1          | YPL234C                 | TFP3          |
| YJR063W                                          | RPA12         | YBR010W                 | HHT1          |
| YGL212W                                          | VAM7          | YGL223C                 | COG1          |
| YGR270W                                          | YTA7          | YNL225C                 | CNM67         |
| YDR254W                                          | CHL4          | YPR120C                 | CLB5          |
| YHR200W                                          | RPN10         | YJR035W                 | RAD26         |
| YMR133W                                          | REC114        | YML001W                 | YPT7          |
| YKL117W                                          | SBA1          | YFL047W                 | RGD2          |
| YDR448W                                          | ADA2          | YBR289W                 | SNF5          |
| YLR418C                                          | CDC73         | YBR089C-A               | NHP6B         |
| YPL037C                                          | EGD1          | YMR133W                 | REC114        |
| YGL174W                                          | BUD13         | YLR182W                 | SWI6          |
| YML013W                                          | UBX2          | YBR283C                 | SSH1          |
| YLL039C                                          | UBI4          | YDL190C                 | UFD2          |
| YOR127W                                          | RGA1          | YMR055C                 | BUB2          |
| YBR217W                                          | ATG12         | YGL003C                 | CDH1          |
| YDR183W                                          | PLP1          | YAR014C                 | BUD14         |
| YIL076W                                          | SEC28         | YNL076W                 | MKS1          |
| YGL147C                                          | RPL9A         | YEL060C                 | PRB1          |
| YBR173C                                          | UMP1          | YCR066W                 | RAD18         |
| YFR010W                                          | UBP6          | YGR184C                 | UBR1          |
| YJR032W                                          | CPR7          | YDR318W                 | MCM21         |
| YIL159W                                          | BNR1          | YDR358W                 | GGA1          |
| YML095C                                          | RAD10         | YKL048C                 | ELM1          |
| YBL103C                                          | RTG3          | YLR093C                 | NYV1          |

| Predictions at threshold level 0.75 continued... |               |                         |               |
|--------------------------------------------------|---------------|-------------------------|---------------|
| Gene1 of predicted pair                          |               | Gene2 of predicted pair |               |
| Systematic Name                                  | Standard Name | Systematic Name         | Standard Name |
| YHR134W                                          | WSS1          | YDR318W                 | MCM21         |
| YOR023C                                          | AHC1          | YJR090C                 | GRR1          |
| YCR066W                                          | RAD18         | YGL115W                 | SNF4          |
| YLR360W                                          | VPS38         | YLR399C                 | BDF1          |
| YHR200W                                          | RPN10         | YOR327C                 | SNC2          |
| YOR195W                                          | SLK19         | YLR386W                 | VAC14         |
| YJL154C                                          | VPS35         | YNL079C                 | TPM1          |
| YDR171W                                          | HSP42         | YPR119W                 | CLB2          |
| YBR057C                                          | MUM2          | YLR370C                 | ARC18         |
| YBR107C                                          | IML3          | YLR370C                 | ARC18         |
| YBR215W                                          | HPC2          | YPR046W                 | MCM16         |
| YGL174W                                          | BUD13         | YAL002W                 | VPS8          |
| YER120W                                          | SCS2          | YAL002W                 | VPS8          |
| YLR320W                                          | MMS22         | YOL081W                 | IRA2          |
| YPR131C                                          | NAT3          | YOR080W                 | DIA2          |
| YFR024C-A                                        | LSB3          | YHR114W                 | BZZ1          |
| YPR051W                                          | MAK3          | YGR054W                 | YGR054W       |
| YLR135W                                          | SLX4          | YPL057C                 | SUR1          |
| YDR137W                                          | RGP1          | YLR370C                 | ARC18         |
| YBR217W                                          | ATG12         | YDL223C                 | HBT1          |
| YBL047C                                          | EDE1          | YBR082C                 | UBC4          |
| YGL163C                                          | RAD54         | YCR077C                 | PAT1          |
| YJR135C                                          | MCM22         | YKL114C                 | APN1          |
| YGR129W                                          | SYF2          | YPL213W                 | LEA1          |
| YGL087C                                          | MMS2          | YPL018W                 | CTF19         |
| YEL043W                                          | YEL043W       | YDL077C                 | VAM6          |
| YDL020C                                          | RPN4          | YLR337C                 | VRP1          |
| YNL218W                                          | MGS1          | YOL030W                 | GAS5          |
| YLR386W                                          | VAC14         | YJL124C                 | LSM1          |

| Predictions at threshold level 0.75 continued... |               |                         |               |
|--------------------------------------------------|---------------|-------------------------|---------------|
| Gene1 of predicted pair                          |               | Gene2 of predicted pair |               |
| Systematic Name                                  | Standard Name | Systematic Name         | Standard Name |
| YDL149W                                          | ATG9          | YER162C                 | RAD4          |
| YCR081W                                          | SRB8          | YPL256C                 | CLN2          |
| YDR156W                                          | RPA14         | YPL152W                 | RRD2          |
| YJR135C                                          | MCM22         | YLR032W                 | RAD5          |
| YDL083C                                          | RPS16B        | YBR019C                 | GAL10         |
| YHR161C                                          | YAP1801       | YBL106C                 | SRO77         |
| YNL087W                                          | TCB2          | YBR171W                 | SEC66         |
| YER116C                                          | SLX8          | YJL183W                 | MNN11         |
| YDR146C                                          | SWI5          | YNL199C                 | GCR2          |
| YMR109W                                          | MYO5          | YGL124C                 | MON1          |
| YDR174W                                          | HMO1          | YDR318W                 | MCM21         |
| YHR200W                                          | RPN10         | YPL152W                 | RRD2          |
| YDR202C                                          | RAV2          | YPL234C                 | TFP3          |
| YOR270C                                          | VPH1          | YBR127C                 | VMA2          |
| YGL163C                                          | RAD54         | YNL107W                 | YAF9          |
| YPR141C                                          | KAR3          | YIL033C                 | BCY1          |
| YDR378C                                          | LSM6          | YPL152W                 | RRD2          |
| YNR072W                                          | HXT17         | YNL041C                 | COG6          |
| YJL176C                                          | SWI3          | YDR245W                 | MNN10         |
| YLR288C                                          | MEC3          | YCR066W                 | RAD18         |
| YMR004W                                          | MVP1          | YPR051W                 | MAK3          |
| YJR040W                                          | GEF1          | YLR309C                 | IMH1          |
| YKR020W                                          | VPS51         | YNL127W                 | FAR11         |
| YDR004W                                          | RAD57         | YNL076W                 | MKS1          |
| YMR246W                                          | FAA4          | YKL094W                 | YJU3          |
| YCR065W                                          | HCM1          | YGL003C                 | CDH1          |
| YBR200W                                          | BEM1          | YEL027W                 | CUP5          |
| YNL041C                                          | COG6          | YMR152W                 | YIM1          |
| YKL135C                                          | APL2          | YNR006W                 | VPS27         |

| Predictions at threshold level 0.75 continued... |               |                         |               |
|--------------------------------------------------|---------------|-------------------------|---------------|
| Gene1 of predicted pair                          |               | Gene2 of predicted pair |               |
| Systematic Name                                  | Standard Name | Systematic Name         | Standard Name |
| YIL034C                                          | CAP2          | YDR293C                 | SSD1          |
| YDR225W                                          | HTA1          | YNL031C                 | HHT2          |
| YOR033C                                          | EXO1          | YPR131C                 | NAT3          |
| YLR079W                                          | SIC1          | YPL246C                 | RBD2          |
| YKR095W                                          | MLP1          | YAL009W                 | SPO7          |
| YNL238W                                          | KEX2          | YEL051W                 | VMA8          |
| YHR108W                                          | GGA2          | YLR425W                 | TUS1          |
| YOR069W                                          | VPS5          | YDL192W                 | ARF1          |
| YML095C                                          | RAD10         | YBR107C                 | IML3          |
| YGL115W                                          | SNF4          | YCR053W                 | THR4          |
| YIL053W                                          | RHR2          | YLR452C                 | SST2          |
| YPL042C                                          | SSN3          | YIR005W                 | IST3          |
| YLR441C                                          | RPS1A         | YGL115W                 | SNF4          |
| YOR332W                                          | VMA4          | YIL002C                 | INP51         |
| YMR055C                                          | BUB2          | YDR171W                 | HSP42         |
| YOR080W                                          | DIA2          | YLR410W                 | VIP1          |
| YNL218W                                          | MGS1          | YLR410W                 | VIP1          |
| YKR020W                                          | VPS51         | YPR173C                 | VPS4          |
| YLL039C                                          | UBI4          | YKL006W                 | RPL14A        |
| YHR061C                                          | GIC1          | YBL085W                 | BOI1          |
| YLR093C                                          | NYV1          | YOL018C                 | TLG2          |
| YPR131C                                          | NAT3          | YGL163C                 | RAD54         |
| YDR245W                                          | MNN10         | YDL226C                 | GCS1          |
| YLR083C                                          | EMP70         | YCR066W                 | RAD18         |
| YKL110C                                          | KTI12         | YFR036W                 | CDC26         |
| YGR261C                                          | APL6          | YPL195W                 | APL5          |
| YOR127W                                          | RGA1          | YEL043W                 | YEL043W       |
| YPR036W                                          | VMA13         | YEL051W                 | VMA8          |
| YNL215W                                          | IES2          | YLR182W                 | SWI6          |

| Predictions at threshold level 0.75 continued... |               |                         |               |
|--------------------------------------------------|---------------|-------------------------|---------------|
| Gene1 of predicted pair                          |               | Gene2 of predicted pair |               |
| Systematic Name                                  | Standard Name | Systematic Name         | Standard Name |
| YOR270C                                          | VPH1          | YHR081W                 | LRP1          |
| YGL066W                                          | SGF73         | YBR200W                 | BEM1          |
| YJR090C                                          | GRR1          | YOR368W                 | RAD17         |
| YER144C                                          | UBP5          | YLR320W                 | MMS22         |
| YMR224C                                          | MRE11         | YDR295C                 | HDA2          |
| YKL048C                                          | ELM1          | YIL103W                 | DPH1          |
| YNL166C                                          | BNI5          | YJR090C                 | GRR1          |
| YDR469W                                          | SDC1          | YDR318W                 | MCM21         |
| YDR146C                                          | SWI5          | YEL056W                 | HAT2          |
| YBR173C                                          | UMP1          | YER040W                 | GLN3          |
| YDR156W                                          | RPA14         | YNL215W                 | IES2          |
| YOR195W                                          | SLK19         | YDR254W                 | CHL4          |
| YLR337C                                          | VRP1          | YPL018W                 | CTF19         |
| YGL087C                                          | MMS2          | YLR447C                 | VMA6          |
| YFR010W                                          | UBP6          | YOR043W                 | WHI2          |
| YML115C                                          | VAN1          | YML067C                 | ERV41         |
| YMR116C                                          | ASC1          | YLR313C                 | SPH1          |
| YLR079W                                          | SIC1          | YGR059W                 | SPR3          |
| YFR010W                                          | UBP6          | YPL152W                 | RRD2          |
| YMR125W                                          | STO1          | YFL047W                 | RGD2          |
| YDR004W                                          | RAD57         | YPL001W                 | HAT1          |
| YJL176C                                          | SWI3          | YGL200C                 | EMP24         |
| YLR288C                                          | MEC3          | YLR032W                 | RAD5          |
| YNL199C                                          | GCR2          | YDR207C                 | UME6          |
| YKR020W                                          | VPS51         | YNL238W                 | KEX2          |
| YHR134W                                          | WSS1          | YLR447C                 | VMA6          |
| YKR099W                                          | BAS1          | YDR207C                 | UME6          |
| YHR119W                                          | SET1          | YOL145C                 | CTR9          |
| YOR066W                                          | MSA1          | YPL195W                 | APL5          |



| Predictions at threshold level 0.75 continued... |               |                         |               |
|--------------------------------------------------|---------------|-------------------------|---------------|
| Gene1 of predicted pair                          |               | Gene2 of predicted pair |               |
| Systematic Name                                  | Standard Name | Systematic Name         | Standard Name |
| YDR443C                                          | SSN2          | YGR134W                 | CAF130        |
| YPL106C                                          | SSE1          | YLR357W                 | RSC2          |
| YDR108W                                          | GSG1          | YGL054C                 | ERV14         |
| YGR108W                                          | CLB1          | YBR114W                 | RAD16         |
| YJL060W                                          | BNA3          | YPR119W                 | CLB2          |
| YDR071C                                          | PAA1          | YDR469W                 | SDC1          |
| YLR386W                                          | VAC14         | YAR014C                 | BUD14         |
| YOR275C                                          | RIM20         | YLR371W                 | ROM2          |
| YPL057C                                          | SUR1          | YFR036W                 | CDC26         |
| YBR171W                                          | SEC66         | YLR180W                 | SAM1          |
| YBL051C                                          | PIN4          | YJL095W                 | BCK1          |
| YKR001C                                          | VPS1          | YAL002W                 | VPS8          |
| YOL110W                                          | SHR5          | YLR246W                 | ERF2          |
| YEL065W                                          | SIT1          | YPL195W                 | APL5          |
| YPL024W                                          | RMI1          | YPR046W                 | MCM16         |
| YMR198W                                          | CIK1          | YDR310C                 | SUM1          |
| YHR060W                                          | VMA22         | YNL238W                 | KEX2          |
| YCL037C                                          | SRO9          | YDR363W-A               | SEM1          |
| YGR184C                                          | UBR1          | YDR076W                 | RAD55         |
| YPR036W                                          | VMA13         | YBR171W                 | SEC66         |
| YLR452C                                          | SST2          | YMR152W                 | YIM1          |
| YPR051W                                          | MAK3          | YDR254W                 | CHL4          |
| YPR120C                                          | CLB5          | YPL018W                 | CTF19         |
| YDR156W                                          | RPA14         | YKL110C                 | KTI12         |
| YPL178W                                          | CBC2          | YMR273C                 | ZDS1          |
| YMR004W                                          | MVP1          | YDR153C                 | ENT5          |
| YNL325C                                          | FIG4          | YEL060C                 | PRB1          |
| YDR320C                                          | SWA2          | YDL137W                 | ARF2          |
| YER040W                                          | GLN3          | YMR230W                 | RPS10B        |

| Predictions at threshold level 0.75 continued... |               |                         |               |
|--------------------------------------------------|---------------|-------------------------|---------------|
| Gene1 of predicted pair                          |               | Gene2 of predicted pair |               |
| Systematic Name                                  | Standard Name | Systematic Name         | Standard Name |
| YDR261C                                          | EXG2          | YJR032W                 | CPR7          |
| YDR443C                                          | SSN2          | YOR106W                 | VAM3          |
| YLL007C                                          | YLL007C       | YBL051C                 | PIN4          |
| YJR125C                                          | ENT3          | YEL013W                 | VAC8          |
| YDR318W                                          | MCM21         | YDR183W                 | PLP1          |
| YOR033C                                          | EXO1          | YNR052C                 | POP2          |
| YGR019W                                          | UGA1          | YOR023C                 | AHC1          |
| YIL036W                                          | CST6          | YGL200C                 | EMP24         |
| YER139C                                          | YER139C       | YLR182W                 | SWI6          |
| YDL083C                                          | RPS16B        | YER139C                 | YER139C       |
| YKR072C                                          | SIS2          | YDR207C                 | UME6          |
| YIL053W                                          | RHR2          | YPL024W                 | RMI1          |
| YGL163C                                          | RAD54         | YGL252C                 | RTG2          |
| YLR018C                                          | POM34         | YPL246C                 | RBD2          |
| YNL238W                                          | KEX2          | YPR046W                 | MCM16         |
| YML115C                                          | VAN1          | YKR020W                 | VPS51         |
| YMR198W                                          | CIK1          | YOR035C                 | SHE4          |
| YGL174W                                          | BUD13         | YNL041C                 | COG6          |
| YLR119W                                          | SRN2          | YLR386W                 | VAC14         |
| YPL045W                                          | VPS16         | YPR028W                 | YOP1          |
| YBR171W                                          | SEC66         | YNL293W                 | MSB3          |
| YLR320W                                          | MMS22         | YLR093C                 | NYV1          |
| YGL025C                                          | PGD1          | YDR358W                 | GGA1          |
| YGL147C                                          | RPL9A         | YJR084W                 | CSN12         |
| YOR109W                                          | INP53         | YJL004C                 | SYS1          |
| YIL034C                                          | CAP2          | YJL183W                 | MNN11         |
| YMR276W                                          | DSK2          | YHR108W                 | GGA2          |
| YBR200W                                          | BEM1          | YNL248C                 | RPA49         |
| YER096W                                          | SHC1          | YMR311C                 | GLC8          |

| Predictions at threshold level 0.75 continued... |               |                         |               |
|--------------------------------------------------|---------------|-------------------------|---------------|
| Gene1 of predicted pair                          |               | Gene2 of predicted pair |               |
| Systematic Name                                  | Standard Name | Systematic Name         | Standard Name |
| YDR363W-A                                        | SEM1          | YJL095W                 | BCK1          |
| YOR043W                                          | WHI2          | YEL056W                 | HAT2          |
| YMR026C                                          | PEX12         | YDR265W                 | PEX10         |
| YNL079C                                          | TPM1          | YBL072C                 | RPS8A         |
| YGL066W                                          | SGF73         | YNL236W                 | SIN4          |
| YOR033C                                          | EXO1          | YMR106C                 | YKU80         |
| YDR363W-A                                        | SEM1          | YKL213C                 | DOA1          |
| YDR443C                                          | SSN2          | YER068W                 | MOT2          |
| YBL003C                                          | HTA2          | YBR009C                 | HHF1          |
| YER143W                                          | DDI1          | YDL047W                 | SIT4          |
| YJL183W                                          | MNN11         | YJL095W                 | BCK1          |
| YDR245W                                          | MNN10         | YDR378C                 | LSM6          |
| YKR099W                                          | BAS1          | YER122C                 | GLO3          |
| YMR127C                                          | SAS2          | YML102W                 | CAC2          |
| YKL048C                                          | ELM1          | YIL038C                 | NOT3          |
| YDL002C                                          | NHP10         | YPL057C                 | SUR1          |
| YLR079W                                          | SIC1          | YKR001C                 | VPS1          |
| YBR111W-A                                        | SUS1          | YLR055C                 | SPT8          |
| YNL106C                                          | INP52         | YJL004C                 | SYS1          |
| YBL047C                                          | EDE1          | YKL101W                 | HSL1          |
| YLR119W                                          | SRN2          | YFR036W                 | CDC26         |
| YDR383C                                          | NKP1          | YIL103W                 | DPH1          |
| YDR261C                                          | EXG2          | YOR327C                 | SNC2          |
| YER162C                                          | RAD4          | YOL121C                 | RPS19A        |
| YEL065W                                          | SIT1          | YDL184C                 | RPL41A        |
| YLR324W                                          | PEX30         | YBR168W                 | PEX32         |
| YMR202W                                          | ERG2          | YMR055C                 | BUB2          |
| YOL111C                                          | MDY2          | YNL076W                 | MKS1          |
| YNL325C                                          | FIG4          | YNL076W                 | MKS1          |

| Predictions at threshold level 0.75 continued... |               |                         |               |
|--------------------------------------------------|---------------|-------------------------|---------------|
| Gene1 of predicted pair                          |               | Gene2 of predicted pair |               |
| Systematic Name                                  | Standard Name | Systematic Name         | Standard Name |
| YOR080W                                          | DIA2          | YDR358W                 | GGA1          |
| YDL184C                                          | RPL41A        | YCR053W                 | THR4          |
| YFR031C-A                                        | RPL2A         | YOR290C                 | SNF2          |
| YJR099W                                          | YUH1          | YNR006W                 | VPS27         |
| YPL259C                                          | APM1          | YAL030W                 | SNC1          |
| YHR134W                                          | WSS1          | YDR289C                 | RTT103        |
| YLR083C                                          | EMP70         | YJL036W                 | SNX4          |
| YPL086C                                          | ELP3          | YBR089C-A               | NHP6B         |
| YMR016C                                          | SOK2          | YML071C                 | COG8          |
| YPL253C                                          | VIK1          | YDR207C                 | UME6          |
| YPL115C                                          | BEM3          | YGL151W                 | NUT1          |
| YJL053W                                          | PEP8          | YBR127C                 | VMA2          |
| YMR153W                                          | NUP53         | YLR452C                 | SST2          |
| YMR116C                                          | ASC1          | YML028W                 | TSA1          |
| YLR452C                                          | SST2          | YLR182W                 | SWI6          |
| YNL106C                                          | INP52         | YKL139W                 | CTK1          |
| YBR171W                                          | SEC66         | YLR452C                 | SST2          |
| YLR135W                                          | SLX4          | YJL124C                 | LSM1          |
| YLL022C                                          | HIF1          | YEL056W                 | HAT2          |
| YML028W                                          | TSA1          | YGL031C                 | RPL24A        |
| YML016C                                          | PPZ1          | YGL019W                 | CKB1          |
| YGR270W                                          | YTA7          | YML112W                 | CTK3          |
| YNL288W                                          | CAF40         | YGL124C                 | MON1          |
| YHR152W                                          | SPO12         | YGR135W                 | PRE9          |
| YGR104C                                          | SRB5          | YPL161C                 | BEM4          |
| YPR072W                                          | NOT5          | YPL203W                 | TPK2          |
| YOR127W                                          | RGA1          | YLR447C                 | VMA6          |
| YBL102W                                          | SFT2          | YOL018C                 | TLG2          |
| YDL006W                                          | PTC1          | YPL259C                 | APM1          |

| Predictions at threshold level 0.75 continued... |               |                         |               |
|--------------------------------------------------|---------------|-------------------------|---------------|
| Gene1 of predicted pair                          |               | Gene2 of predicted pair |               |
| Systematic Name                                  | Standard Name | Systematic Name         | Standard Name |
| YLR102C                                          | APC9          | YBR200W                 | BEM1          |
| YLR452C                                          | SST2          | YJL095W                 | BCK1          |
| YOR059C                                          | YOR059C       | YKR046C                 | PET10         |
| YAL055W                                          | PEX22         | YLR131C                 | ACE2          |
| YLR410W                                          | VIP1          | YOL054W                 | PSH1          |
| YOR008C                                          | SLG1          | YER096W                 | SHC1          |
| YOR059C                                          | YOR059C       | YKL140W                 | TGL1          |
| YDR293C                                          | SSD1          | YDR389W                 | SAC7          |
| YJL138C                                          | TIF2          | YKL101W                 | HSL1          |
| YPL042C                                          | SSN3          | YLR381W                 | CTF3          |
| YIL034C                                          | CAP2          | YGR019W                 | UGA1          |
| YDR217C                                          | RAD9          | YGL190C                 | CDC55         |
| YOR368W                                          | RAD17         | YNL082W                 | PMS1          |
| YNL054W                                          | VAC7          | YPL018W                 | CTF19         |
| YJR056C                                          | YJR056C       | YKR035W-A               | DID2          |
| YLR371W                                          | ROM2          | YPL089C                 | RLM1          |
| YMR312W                                          | ELP6          | YHR187W                 | IKI1          |
| YFR010W                                          | UBP6          | YNL041C                 | COG6          |
| YBR108W                                          | YBR108W       | YLR398C                 | SKI2          |
| YMR198W                                          | CIK1          | YMR109W                 | MYO5          |
| YOR312C                                          | RPL20B        | YFR036W                 | CDC26         |
| YAL024C                                          | LTE1          | YBR171W                 | SEC66         |
| YPR030W                                          | CSR2          | YBR280C                 | SAF1          |
| YBR200W                                          | BEM1          | YKL041W                 | VPS24         |
| YJL053W                                          | PEP8          | YER162C                 | RAD4          |
| YDR244W                                          | PEX5          | YDL065C                 | PEX19         |
| YNL199C                                          | GCR2          | YKL160W                 | ELF1          |
| YLR292C                                          | SEC72         | YLR301W                 | YLR301W       |
| YGL124C                                          | MON1          | YDL077C                 | VAM6          |

| Predictions at threshold level 0.75 continued... |               |                         |               |
|--------------------------------------------------|---------------|-------------------------|---------------|
| Gene1 of predicted pair                          |               | Gene2 of predicted pair |               |
| Systematic Name                                  | Standard Name | Systematic Name         | Standard Name |
| YDR202C                                          | RAV2          | YER122C                 | GLO3          |
| YOL067C                                          | RTG1          | YAL002W                 | VPS8          |
| YKL139W                                          | CTK1          | YER122C                 | GLO3          |
| YBR200W                                          | BEM1          | YLR180W                 | SAM1          |
| YJR060W                                          | CBF1          | YIL103W                 | DPH1          |
| YER114C                                          | BOI2          | YNL307C                 | MCK1          |
| YOR290C                                          | SNF2          | YLR410W                 | VIP1          |
| YFR031C-A                                        | RPL2A         | YDL077C                 | VAM6          |
| YMR039C                                          | SUB1          | YLR452C                 | SST2          |
| YBL102W                                          | SFT2          | YGL115W                 | SNF4          |
| YDR363W-A                                        | SEM1          | YDR440W                 | DOT1          |
| YIL053W                                          | RHR2          | YHR060W                 | VMA22         |
| YMR016C                                          | SOK2          | YEL053C                 | MAK10         |
| YFR031C-A                                        | RPL2A         | YGR249W                 | MGA1          |
| YDR293C                                          | SSD1          | YHR111W                 | UBA4          |
| YNL054W                                          | VAC7          | YDR254W                 | CHL4          |
| YDR385W                                          | EFT2          | YAL055W                 | PEX22         |
| YPL120W                                          | VPS30         | YJR033C                 | RAV1          |
| YAL024C                                          | LTE1          | YNL307C                 | MCK1          |
| YBR107C                                          | IML3          | YGL124C                 | MON1          |
| YMR224C                                          | MRE11         | YMR016C                 | SOK2          |
| YML109W                                          | ZDS2          | YNL031C                 | HHT2          |
| YOL043C                                          | NTG2          | YCR066W                 | RAD18         |
| YHR060W                                          | VMA22         | YPR032W                 | SRO7          |
| YIL076W                                          | SEC28         | YKL048C                 | ELM1          |
| YLR386W                                          | VAC14         | YOR358W                 | HAP5          |
| YJR060W                                          | CBF1          | YGL003C                 | CDH1          |
| YJL004C                                          | SYS1          | YDL226C                 | GCS1          |
| YNL032W                                          | SIW14         | YBR019C                 | GAL10         |

| Predictions at threshold level 0.75 continued... |               |                         |               |
|--------------------------------------------------|---------------|-------------------------|---------------|
| Gene1 of predicted pair                          |               | Gene2 of predicted pair |               |
| Systematic Name                                  | Standard Name | Systematic Name         | Standard Name |
| YBL008W                                          | HIR1          | YMR055C                 | BUB2          |
| YKR072C                                          | SIS2          | YOR043W                 | WHI2          |
| YGL190C                                          | CDC55         | YDR422C                 | SIP1          |
| YEL065W                                          | SIT1          | YGL078C                 | DBP3          |
| YBL088C                                          | TEL1          | YIL038C                 | NOT3          |
| YOR275C                                          | RIM20         | YDL047W                 | SIT4          |
| YOR290C                                          | SNF2          | YBR010W                 | HHT1          |
| YOR023C                                          | AHC1          | YPL253C                 | VIK1          |
| YML001W                                          | YPT7          | YNL041C                 | COG6          |
| YMR224C                                          | MRE11         | YIL103W                 | DPH1          |
| YJL036W                                          | SNX4          | YLR309C                 | IMH1          |
| YLL007C                                          | YLL007C       | YEL056W                 | HAT2          |
| YBL021C                                          | HAP3          | YMR109W                 | MYO5          |
| YBR057C                                          | MUM2          | YBL072C                 | RPS8A         |
| YBL103C                                          | RTG3          | YMR214W                 | SCJ1          |
| YER144C                                          | UBP5          | YPR046W                 | MCM16         |
| YOR080W                                          | DIA2          | YEL013W                 | VAC8          |
| YPL161C                                          | BEM4          | YPR030W                 | CSR2          |
| YHR013C                                          | ARD1          | YIL103W                 | DPH1          |
| YPR052C                                          | NHP6A         | YKL160W                 | ELF1          |
| YGR249W                                          | MGA1          | YJR056C                 | YJR056C       |
| YAL024C                                          | LTE1          | YGL066W                 | SGF73         |
| YPR036W                                          | VMA13         | YLR094C                 | GIS3          |
| YPR120C                                          | CLB5          | YDL047W                 | SIT4          |
| YJL124C                                          | LSM1          | YDR254W                 | CHL4          |
| YCR084C                                          | TUP1          | YNL167C                 | SKO1          |
| YBL079W                                          | NUP170        | YJL187C                 | SWE1          |
| YHR161C                                          | YAP1801       | YDL161W                 | ENT1          |
| YKL048C                                          | ELM1          | YPR046W                 | MCM16         |

| Predictions at threshold level 0.75 continued... |               |                         |               |
|--------------------------------------------------|---------------|-------------------------|---------------|
| Gene1 of predicted pair                          |               | Gene2 of predicted pair |               |
| Systematic Name                                  | Standard Name | Systematic Name         | Standard Name |
| YAL051W                                          | OAF1          | YDR310C                 | SUM1          |
| YDR245W                                          | MNN10         | YLR370C                 | ARC18         |
| YGR261C                                          | APL6          | YDR108W                 | GSG1          |
| YOL145C                                          | CTR9          | YDR071C                 | PAA1          |
| YOL111C                                          | MDY2          | YPL195W                 | APL5          |
| YMR153W                                          | NUP53         | YKL126W                 | YPK1          |
| YIL076W                                          | SEC28         | YDR207C                 | UME6          |
| YPR046W                                          | MCM16         | YPR119W                 | CLB2          |
| YMR199W                                          | CLN1          | YLR182W                 | SWI6          |
| YLR386W                                          | VAC14         | YHL002W                 | HSE1          |
| YBR173C                                          | UMP1          | YER162C                 | RAD4          |
| YDR443C                                          | SSN2          | YDR207C                 | UME6          |
| YBR200W                                          | BEM1          | YKL114C                 | APN1          |
| YGR104C                                          | SRB5          | YDL005C                 | MED2          |
| YKL139W                                          | CTK1          | YDL223C                 | HBT1          |
| YFR010W                                          | UBP6          | YLR398C                 | SKI2          |
| YLR309C                                          | IMH1          | YER122C                 | GLO3          |
| YLR083C                                          | EMP70         | YNL051W                 | COG5          |
| YNR072W                                          | HXT17         | YML071C                 | COG8          |
| YHR012W                                          | VPS29         | YDL006W                 | PTC1          |
| YOR109W                                          | INP53         | YGL115W                 | SNF4          |
| YMR179W                                          | SPT21         | YLR381W                 | CTF3          |
| YDL192W                                          | ARF1          | YDR207C                 | UME6          |
| YHR200W                                          | RPN10         | YER139C                 | YER139C       |
| YBL052C                                          | SAS3          | YBR089C-A               | NHP6B         |
| YDR448W                                          | ADA2          | YKL109W                 | HAP4          |
| YOR109W                                          | INP53         | YAL030W                 | SNC1          |
| YAL024C                                          | LTE1          | YHR061C                 | GIC1          |
| YLR079W                                          | SIC1          | YMR153W                 | NUP53         |



| Predictions at threshold level 0.75 continued... |               |                         |               |
|--------------------------------------------------|---------------|-------------------------|---------------|
| Gene1 of predicted pair                          |               | Gene2 of predicted pair |               |
| Systematic Name                                  | Standard Name | Systematic Name         | Standard Name |
| YPL096C-A                                        | ERI1          | YMR089C                 | YTA12         |
| YMR095C                                          | SNO1          | YJR032W                 | CPR7          |
| YJL138C                                          | TIF2          | YCR031C                 | RPS14A        |
| YKL139W                                          | CTK1          | YER139C                 | YER139C       |
| YNL058C                                          | YNL058C       | YNL076W                 | MKS1          |
| YDL020C                                          | RPN4          | YML016C                 | PPZ1          |
| YMR284W                                          | YKU70         | YOL090W                 | MSH2          |
| YGL033W                                          | HOP2          | YHR039C-A               | VMA10         |
| YDL155W                                          | CLB3          | YGR188C                 | BUB1          |
| YDR448W                                          | ADA2          | YOL148C                 | SPT20         |
| YDL223C                                          | HBT1          | YJR084W                 | CSN12         |
| YOL051W                                          | GAL11         | YGL094C                 | PAN2          |
| YGL003C                                          | CDH1          | YNL107W                 | YAF9          |
| YKL025C                                          | PAN3          | YKL114C                 | APN1          |
| YBL085W                                          | BOI1          | YER158C                 | YER158C       |
| YJL124C                                          | LSM1          | YJL187C                 | SWE1          |
| YBR200W                                          | BEM1          | YNL199C                 | GCR2          |
| YHR152W                                          | SPO12         | YDR264C                 | AKR1          |
| YGR252W                                          | GCN5          | YDL006W                 | PTC1          |
| YPR046W                                          | MCM16         | YER139C                 | YER139C       |
| YBR290W                                          | BSD2          | YLR360W                 | VPS38         |
| YNR052C                                          | POP2          | YDR439W                 | LRS4          |
| YOR127W                                          | RGA1          | YKL101W                 | HSL1          |
| YPL096C-A                                        | ERI1          | YKL079W                 | SMY1          |
| YJL029C                                          | VPS53         | YPL045W                 | VPS16         |
| YIL008W                                          | URM1          | YEL056W                 | HAT2          |
| YGR184C                                          | UBR1          | YLR219W                 | MSC3          |
| YLR095C                                          | IOC2          | YLR441C                 | RPS1A         |
| YPL057C                                          | SUR1          | YDR363W-A               | SEM1          |

| Predictions at threshold level 0.75 continued... |               |                         |               |
|--------------------------------------------------|---------------|-------------------------|---------------|
| Gene1 of predicted pair                          |               | Gene2 of predicted pair |               |
| Systematic Name                                  | Standard Name | Systematic Name         | Standard Name |
| YOR109W                                          | INP53         | YPL259C                 | APM1          |
| YDR156W                                          | RPA14         | YCR077C                 | PAT1          |
| YLR006C                                          | SSK1          | YHR111W                 | UBA4          |
| YMR198W                                          | CIK1          | YMR089C                 | YTA12         |
| YDR245W                                          | MNN10         | YBR260C                 | RGD1          |
| YBR111W-A                                        | SUS1          | YGR252W                 | GCN5          |
| YAL024C                                          | LTE1          | YJR135C                 | MCM22         |
| YGR135W                                          | PRE9          | YBL072C                 | RPS8A         |
| YDR080W                                          | VPS41         | YOL018C                 | TLG2          |
| YJL183W                                          | MNN11         | YNL107W                 | YAF9          |
| YBR200W                                          | BEM1          | YPL037C                 | EGD1          |
| YKL116C                                          | PRR1          | YNL087W                 | TCB2          |
| YLR381W                                          | CTF3          | YPR051W                 | MAK3          |
| YGL003C                                          | CDH1          | YOR035C                 | SHE4          |
| YKL139W                                          | CTK1          | YNL041C                 | COG6          |
| YOR290C                                          | SNF2          | YBL025W                 | RRN10         |
| YFR021W                                          | ATG18         | YLR094C                 | GIS3          |
| YDL127W                                          | PCL2          | YGL161C                 | YIP5          |
| YDR156W                                          | RPA14         | YIL103W                 | DPH1          |
| YFR031C-A                                        | RPL2A         | YOL121C                 | RPS19A        |
| YKL101W                                          | HSL1          | YBL087C                 | RPL23A        |
| YJL053W                                          | PEP8          | YGL115W                 | SNF4          |
| YGR097W                                          | ASK10         | YPR119W                 | CLB2          |
| YPR101W                                          | SNT309        | YDR163W                 | CWC15         |
| YPR018W                                          | RLF2          | YDR004W                 | RAD57         |
| YHR060W                                          | VMA22         | YOL018C                 | TLG2          |
| YOR109W                                          | INP53         | YHR060W                 | VMA22         |
| YOR140W                                          | SFL1          | YOR014W                 | RTS1          |
| YER116C                                          | SLX8          | YER162C                 | RAD4          |

| Predictions at threshold level 0.75 continued... |               |                         |               |
|--------------------------------------------------|---------------|-------------------------|---------------|
| Gene1 of predicted pair                          |               | Gene2 of predicted pair |               |
| Systematic Name                                  | Standard Name | Systematic Name         | Standard Name |
| YDR439W                                          | LRS4          | YOL054W                 | PSH1          |
| YDR293C                                          | SSD1          | YDR155C                 | CPR1          |
| YML117W                                          | NAB6          | YPL161C                 | BEM4          |
| YLR320W                                          | MMS22         | YBR036C                 | CSG2          |
| YPR052C                                          | NHP6A         | YGL019W                 | CKB1          |
| YFR032C-A                                        | RPL29         | YMR038C                 | CCS1          |
| YOR195W                                          | SLK19         | YMR038C                 | CCS1          |
| YKL214C                                          | YRA2          | YNL004W                 | HRB1          |
| YPL120W                                          | VPS30         | YDR310C                 | SUM1          |
| YML062C                                          | MFT1          | YMR273C                 | ZDS1          |
| YJL124C                                          | LSM1          | YNL307C                 | MCK1          |
| YGR270W                                          | YTA7          | YHR114W                 | BZZ1          |
| YAL024C                                          | LTE1          | YGL115W                 | SNF4          |
| YHR108W                                          | GGA2          | YMR038C                 | CCS1          |
| YMR153W                                          | NUP53         | YPL195W                 | APL5          |
| YDR142C                                          | PEX7          | YGL205W                 | POX1          |
| YER044C                                          | ERG28         | YNL238W                 | KEX2          |
| YLR360W                                          | VPS38         | YML001W                 | YPT7          |
| YDR129C                                          | SAC6          | YHL002W                 | HSE1          |
| YGL078C                                          | DBP3          | YKL139W                 | CTK1          |
| YML001W                                          | YPT7          | YHR081W                 | LRP1          |
| YPR046W                                          | MCM16         | YJR090C                 | GRR1          |
| YIR003W                                          | YIR003W       | YMR109W                 | MYO5          |
| YNL325C                                          | FIG4          | YMR230W                 | RPS10B        |
| YLR410W                                          | VIP1          | YGL003C                 | CDH1          |
| YFR031C-A                                        | RPL2A         | YGL003C                 | CDH1          |
| YJL136C                                          | RPS21B        | YGL031C                 | RPL24A        |
| YLR083C                                          | EMP70         | YBL102W                 | SFT2          |
| YHR134W                                          | WSS1          | YDR207C                 | UME6          |

| Predictions at threshold level 0.75 continued... |               |                         |               |
|--------------------------------------------------|---------------|-------------------------|---------------|
| Gene1 of predicted pair                          |               | Gene2 of predicted pair |               |
| Systematic Name                                  | Standard Name | Systematic Name         | Standard Name |
| YMR231W                                          | PEP5          | YDR207C                 | UME6          |
| YHR073W                                          | OSH3          | YKL117W                 | SBA1          |
| YDR130C                                          | FIN1          | YPR119W                 | CLB2          |
| YLR216C                                          | CPR6          | YDR318W                 | MCM21         |
| YBR278W                                          | DPB3          | YHR039C-A               | VMA10         |
| YDL223C                                          | HBT1          | YGL200C                 | EMP24         |
| YCL037C                                          | SRO9          | YGR270W                 | YTA7          |
| YIL071C                                          | PCI8          | YKR026C                 | GCN3          |
| YMR095C                                          | SNO1          | YBL103C                 | RTG3          |
| YBL003C                                          | HTA2          | YKR048C                 | NAP1          |
| YDR383C                                          | NKP1          | YNL107W                 | YAF9          |
| YDR363W-A                                        | SEM1          | YOR368W                 | RAD17         |
| YJL053W                                          | PEP8          | YMR004W                 | MVP1          |
| YDR378C                                          | LSM6          | YLR182W                 | SWI6          |
| YDL232W                                          | OST4          | YJR010C-A               | SPC1          |
| YBL008W                                          | HIR1          | YJL140W                 | RPB4          |
| YMR089C                                          | YTA12         | YDR207C                 | UME6          |
| YBR194W                                          | SOY1          | YNL107W                 | YAF9          |
| YKL048C                                          | ELM1          | YMR214W                 | SCJ1          |
| YJL036W                                          | SNX4          | YPL234C                 | TFP3          |
| YHL002W                                          | HSE1          | YOL081W                 | IRA2          |
| YNL243W                                          | SLA2          | YMR224C                 | MRE11         |
| YLR240W                                          | VPS34         | YMR231W                 | PEP5          |
| YMR224C                                          | MRE11         | YNL016W                 | PUB1          |
| YLR090W                                          | XDJ1          | YBR126C                 | TPS1          |
| YNL215W                                          | IES2          | YOR043W                 | WHI2          |
| YDR469W                                          | SDC1          | YDR440W                 | DOT1          |
| YLR320W                                          | MMS22         | YMR038C                 | CCS1          |
| YLL007C                                          | YLL007C       | YAR014C                 | BUD14         |

| Predictions at threshold level 0.75 continued... |               |                         |               |
|--------------------------------------------------|---------------|-------------------------|---------------|
| Gene1 of predicted pair                          |               | Gene2 of predicted pair |               |
| Systematic Name                                  | Standard Name | Systematic Name         | Standard Name |
| YGL054C                                          | ERV14         | YJR033C                 | RAV1          |
| YGL003C                                          | CDH1          | YEL060C                 | PRB1          |
| YDR245W                                          | MNN10         | YGL163C                 | RAD54         |
| YJL095W                                          | BCK1          | YHR158C                 | KEL1          |
| YEL009C                                          | GCN4          | YCR084C                 | TUP1          |
| YNL238W                                          | KEX2          | YER162C                 | RAD4          |
| YGR108W                                          | CLB1          | YJR135C                 | MCM22         |
| YPR036W                                          | VMA13         | YML071C                 | COG8          |
| YPR018W                                          | RLF2          | YKL101W                 | HSL1          |
| YDL155W                                          | CLB3          | YBR283C                 | SSH1          |
| YDR293C                                          | SSD1          | YMR054W                 | STV1          |
| YOR195W                                          | SLK19         | YBR107C                 | IML3          |
| YHR156C                                          | LIN1          | YFR036W                 | CDC26         |
| YGL115W                                          | SNF4          | YER122C                 | GLO3          |
| YCR020W-B                                        | HTL1          | YPR120C                 | CLB5          |
| YPL240C                                          | HSP82         | YML132W                 | COS3          |
| YCR066W                                          | RAD18         | YJL004C                 | SYS1          |
| YHR098C                                          | SFB3          | YJL168C                 | SET2          |
| YMR153W                                          | NUP53         | YPL256C                 | CLN2          |
| YDL116W                                          | NUP84         | YDR101C                 | ARX1          |
| YIL159W                                          | BNR1          | YER139C                 | YER139C       |
| YLR337C                                          | VRP1          | YBR200W                 | BEM1          |
| YDR004W                                          | RAD57         | YGR081C                 | SLX9          |
| YLR119W                                          | SRN2          | YER040W                 | GLN3          |
| YOL051W                                          | GAL11         | YGR135W                 | PRE9          |
| YDR293C                                          | SSD1          | YDR335W                 | MSN5          |
| YML013W                                          | UBX2          | YMR022W                 | UBC7          |
| YOR080W                                          | DIA2          | YBR215W                 | HPC2          |
| YOL072W                                          | THP1          | YBR111W-A               | SUS1          |

| Predictions at threshold level 0.75 continued... |               |                         |               |
|--------------------------------------------------|---------------|-------------------------|---------------|
| Gene1 of predicted pair                          |               | Gene2 of predicted pair |               |
| Systematic Name                                  | Standard Name | Systematic Name         | Standard Name |
| YBL047C                                          | EDE1          | YHR111W                 | UBA4          |
| YLR095C                                          | IOC2          | YIL053W                 | RHR2          |
| YML001W                                          | YPT7          | YER122C                 | GLO3          |
| YNL049C                                          | SFB2          | YEL036C                 | ANP1          |
| YPL037C                                          | EGD1          | YNL051W                 | COG5          |
| YBL079W                                          | NUP170        | YDR076W                 | RAD55         |
| YMR055C                                          | BUB2          | YLR182W                 | SWI6          |
| YML016C                                          | PPZ1          | YEL053C                 | MAK10         |
| YNL068C                                          | FKH2          | YHR152W                 | SPO12         |
| YNL016W                                          | PUB1          | YBR082C                 | UBC4          |
| YGL174W                                          | BUD13         | YDR289C                 | RTT103        |
| YIL053W                                          | RHR2          | YHR039C-A               | VMA10         |
| YJL036W                                          | SNX4          | YLR423C                 | ATG17         |
| YDR202C                                          | RAV2          | YNL297C                 | MON2          |
| YHR064C                                          | SSZ1          | YGR285C                 | ZUO1          |
| YLR315W                                          | NKP2          | YJL006C                 | CTK2          |
| YDR383C                                          | NKP1          | YNL215W                 | IES2          |
| YKL126W                                          | YPK1          | YNL058C                 | YNL058C       |
| YMR172W                                          | HOT1          | YHR012W                 | VPS29         |
| YOR001W                                          | RRP6          | YCR086W                 | CSM1          |
| YMR224C                                          | MRE11         | YER162C                 | RAD4          |
| YMR004W                                          | MVP1          | YJR040W                 | GEF1          |
| YAR014C                                          | BUD14         | YNL107W                 | YAF9          |
| YDR192C                                          | NUP42         | YMR273C                 | ZDS1          |
| YMR198W                                          | CIK1          | YKL048C                 | ELM1          |
| YNL201C                                          | PSY2          | YNL248C                 | RPA49         |
| YPL024W                                          | RMI1          | YBR217W                 | ATG12         |
| YLR386W                                          | VAC14         | YJR032W                 | CPR7          |
| YLR079W                                          | SIC1          | YDR183W                 | PLP1          |

| Predictions at threshold level 0.75 continued... |               |                         |               |
|--------------------------------------------------|---------------|-------------------------|---------------|
| Gene1 of predicted pair                          |               | Gene2 of predicted pair |               |
| Systematic Name                                  | Standard Name | Systematic Name         | Standard Name |
| YBL103C                                          | RTG3          | YFL023W                 | BUD27         |
| YLR018C                                          | POM34         | YER115C                 | SPR6          |
| YMR127C                                          | SAS2          | YJL190C                 | RPS22A        |
| YHL002W                                          | HSE1          | YBR114W                 | RAD16         |
| YOR069W                                          | VPS5          | YAL030W                 | SNC1          |
| YFR031C-A                                        | RPL2A         | YLR192C                 | HCR1          |
| YLR399C                                          | BDF1          | YLR182W                 | SWI6          |
| YDR320C                                          | SWA2          | YGL115W                 | SNF4          |
| YFR010W                                          | UBP6          | YAL002W                 | VPS8          |
| YKL032C                                          | IXR1          | YNL229C                 | URE2          |
| YGL178W                                          | MPT5          | YDR388W                 | RVS167        |
| YGL178W                                          | MPT5          | YHR030C                 | SLT2          |
| YLR148W                                          | PEP3          | YDR323C                 | PEP7          |
| YKR028W                                          | SAP190        | YDL047W                 | SIT4          |
| YPL096C-A                                        | ERI1          | YCR009C                 | RVS161        |
| YBR200W                                          | BEM1          | YEL053C                 | MAK10         |
| YCR066W                                          | RAD18         | YPR119W                 | CLB2          |
| YPL137C                                          | GIP3          | YBL025W                 | RRN10         |
| YPL042C                                          | SSN3          | YJR135C                 | MCM22         |
| YDL113C                                          | ATG20         | YLR191W                 | PEX13         |
| YAL024C                                          | LTE1          | YPL152W                 | RRD2          |
| YNL079C                                          | TPM1          | YPL256C                 | CLN2          |
| YPL129W                                          | TAF14         | YMR037C                 | MSN2          |
| YNL243W                                          | SLA2          | YPR029C                 | APL4          |
| YPR018W                                          | RLF2          | YDL116W                 | NUP84         |
| YLR234W                                          | TOP3          | YOR038C                 | HIR2          |
| YGR105W                                          | VMA21         | YJL004C                 | SYS1          |
| YDL192W                                          | ARF1          | YLR180W                 | SAM1          |
| YDL160C                                          | DHH1          | YMR199W                 | CLN1          |

| Predictions at threshold level 0.75 continued... |               |                         |               |
|--------------------------------------------------|---------------|-------------------------|---------------|
| Gene1 of predicted pair                          |               | Gene2 of predicted pair |               |
| Systematic Name                                  | Standard Name | Systematic Name         | Standard Name |
| YHR156C                                          | LIN1          | YDL223C                 | HBT1          |
| YKL010C                                          | UFD4          | YKL041W                 | VPS24         |
| YBR194W                                          | SOY1          | YAL002W                 | VPS8          |
| YPL024W                                          | RMI1          | YML028W                 | TSA1          |
| YLR381W                                          | CTF3          | YIR005W                 | IST3          |
| YJR063W                                          | RPA12         | YIL103W                 | DPH1          |
| YPR046W                                          | MCM16         | YDR076W                 | RAD55         |
| YLR079W                                          | SIC1          | YDR318W                 | MCM21         |
| YOR069W                                          | VPS5          | YEL042W                 | GDA1          |
| YDR264C                                          | AKR1          | YGL031C                 | RPL24A        |
| YHR134W                                          | WSS1          | YMR284W                 | YKU70         |
| YBR200W                                          | BEM1          | YKR020W                 | VPS51         |
| YPR072W                                          | NOT5          | YNL030W                 | HHF2          |
| YLR234W                                          | TOP3          | YPL253C                 | VIK1          |
| YOR270C                                          | VPH1          | YEL053C                 | MAK10         |
| YPR036W                                          | VMA13         | YEL060C                 | PRB1          |
| YLR410W                                          | VIP1          | YDL226C                 | GCS1          |
| YGR104C                                          | SRB5          | YBR194W                 | SOY1          |
| YBL051C                                          | PIN4          | YJR090C                 | GRR1          |
| YPL213W                                          | LEA1          | YDR163W                 | CWC15         |
| YKR020W                                          | VPS51         | YAL002W                 | VPS8          |
| YLR119W                                          | SRN2          | YLR441C                 | RPS1A         |
| YPL050C                                          | MNN9          | YGR135W                 | PRE9          |
| YGR108W                                          | CLB1          | YPL161C                 | BEM4          |
| YDR155C                                          | CPR1          | YGR188C                 | BUB1          |
| YNL076W                                          | MKS1          | YGL252C                 | RTG2          |
| YDR129C                                          | SAC6          | YOR008C                 | SLG1          |
| YGL223C                                          | COG1          | YKR020W                 | VPS51         |
| YBL051C                                          | PIN4          | YEL053C                 | MAK10         |



| Predictions at threshold level 0.75 continued... |               |                         |               |
|--------------------------------------------------|---------------|-------------------------|---------------|
| Gene1 of predicted pair                          |               | Gene2 of predicted pair |               |
| Systematic Name                                  | Standard Name | Systematic Name         | Standard Name |
| YOR035C                                          | SHE4          | YHR114W                 | BZZ1          |
| YBR173C                                          | UMP1          | YDL192W                 | ARF1          |
| YFR010W                                          | UBP6          | YPR036W                 | VMA13         |
| YAL009W                                          | SPO7          | YDR207C                 | UME6          |
| YIL053W                                          | RHR2          | YDL223C                 | HBT1          |
| YDR363W-A                                        | SEM1          | YOR038C                 | HIR2          |
| YMR055C                                          | BUB2          | YHR039C-A               | VMA10         |
| YHR150W                                          | PEX28         | YBR168W                 | PEX32         |
| YOR275C                                          | RIM20         | YDR264C                 | AKR1          |
| YDR329C                                          | PEX3          | YGL153W                 | PEX14         |
| YLR452C                                          | SST2          | YLR093C                 | NYV1          |
| YDR225W                                          | HTA1          | YFR036W                 | CDC26         |
| YBR200W                                          | BEM1          | YJL117W                 | PHO86         |
| YLR079W                                          | SIC1          | YGL019W                 | CKB1          |
| YOR132W                                          | VPS17         | YPL195W                 | APL5          |
| YKL025C                                          | PAN3          | YNL288W                 | CAF40         |
| YKR001C                                          | VPS1          | YEL043W                 | YEL043W       |
| YHL031C                                          | GOS1          | YML071C                 | COG8          |
| YOR083W                                          | WHI5          | YGR104C                 | SRB5          |
| YOR001W                                          | RRP6          | YDL155W                 | CLB3          |
| YBR127C                                          | VMA2          | YBL047C                 | EDE1          |
| YKR001C                                          | VPS1          | YJL095W                 | BCK1          |
| YLR381W                                          | CTF3          | YDR183W                 | PLP1          |
| YDR448W                                          | ADA2          | YDR477W                 | SNF1          |
| YCR077C                                          | PAT1          | YLR182W                 | SWI6          |
| YBR194W                                          | SOY1          | YDR289C                 | RTT103        |
| YNL107W                                          | YAF9          | YPR119W                 | CLB2          |
| YLR192C                                          | HCR1          | YLR452C                 | SST2          |
| YOR132W                                          | VPS17         | YOR036W                 | PEP12         |

| Predictions at threshold level 0.75 continued... |               |                         |               |
|--------------------------------------------------|---------------|-------------------------|---------------|
| Gene1 of predicted pair                          |               | Gene2 of predicted pair |               |
| Systematic Name                                  | Standard Name | Systematic Name         | Standard Name |
| YLR093C                                          | NYV1          | YJR125C                 | ENT3          |
| YOR337W                                          | TEA1          | YKL116C                 | PRR1          |
| YDR183W                                          | PLP1          | YJL095W                 | BCK1          |
| YOR080W                                          | DIA2          | YJL006C                 | CTK2          |
| YPL161C                                          | BEM4          | YOL108C                 | INO4          |
| YKL048C                                          | ELM1          | YLR315W                 | NKP2          |
| YNL307C                                          | MCK1          | YMR311C                 | GLC8          |
| YJL154C                                          | VPS35         | YOL108C                 | INO4          |
| YMR055C                                          | BUB2          | YDL226C                 | GCS1          |
| YKR020W                                          | VPS51         | YMR022W                 | UBC7          |
| YHR111W                                          | UBA4          | YKR020W                 | VPS51         |
| YJR063W                                          | RPA12         | YNL030W                 | HHF2          |
| YER044C                                          | ERG28         | YML001W                 | YPT7          |
| YOR132W                                          | VPS17         | YOR035C                 | SHE4          |
| YML001W                                          | YPT7          | YDL077C                 | VAM6          |
| YMR055C                                          | BUB2          | YFR030W                 | MET10         |
| YDR477W                                          | SNF1          | YER049W                 | TPA1          |
| YGR054W                                          | YGR054W       | YJL190C                 | RPS22A        |
| YPL115C                                          | BEM3          | YLR292C                 | SEC72         |
| YJR056C                                          | YJR056C       | YER044C                 | ERG28         |
| YLR083C                                          | EMP70         | YER162C                 | RAD4          |
| YGR270W                                          | YTA7          | YJL095W                 | BCK1          |
| YLR352W                                          | YLR352W       | YDR207C                 | UME6          |
| YLR337C                                          | VRP1          | YGR188C                 | BUB1          |
| YDL083C                                          | RPS16B        | YBR280C                 | SAF1          |
| YHR073W                                          | OSH3          | YBL079W                 | NUP170        |
| YBR200W                                          | BEM1          | YLR370C                 | ARC18         |
| YGL174W                                          | BUD13         | YGR071C                 | YGR071C       |
| YLR119W                                          | SRN2          | YLR192C                 | HCR1          |

| Predictions at threshold level 0.75 continued... |               |                         |               |
|--------------------------------------------------|---------------|-------------------------|---------------|
| Gene1 of predicted pair                          |               | Gene2 of predicted pair |               |
| Systematic Name                                  | Standard Name | Systematic Name         | Standard Name |
| YFR031C-A                                        | RPL2A         | YNL325C                 | FIG4          |
| YMR095C                                          | SNO1          | YLR119W                 | SRN2          |
| YMR016C                                          | SOK2          | YDR137W                 | RGP1          |
| YPL115C                                          | BEM3          | YDR254W                 | CHL4          |
| YNR058W                                          | BIO3          | YDL149W                 | ATG9          |
| YCR065W                                          | HCM1          | YIR009W                 | MSL1          |
| YBL078C                                          | ATG8          | YML001W                 | YPT7          |
| YNR023W                                          | SNF12         | YDR073W                 | SNF11         |
| YJL157C                                          | FAR1          | YGR152C                 | RSR1          |
| YDR289C                                          | RTT103        | YEL013W                 | VAC8          |
| YDR318W                                          | MCM21         | YMR038C                 | CCS1          |
| YEL065W                                          | SIT1          | YOR035C                 | SHE4          |
| YIL034C                                          | CAP2          | YDL226C                 | GCS1          |
| YKR099W                                          | BAS1          | YBL025W                 | RRN10         |
| YNL307C                                          | MCK1          | YLR182W                 | SWI6          |
| YLR292C                                          | SEC72         | YBR114W                 | RAD16         |
| YBL067C                                          | UBP13         | YDR207C                 | UME6          |
| YNL054W                                          | VAC7          | YPL253C                 | VIK1          |
| YLR441C                                          | RPS1A         | YLR180W                 | SAM1          |
| YJL183W                                          | MNN11         | YLR180W                 | SAM1          |
| YLR386W                                          | VAC14         | YPR036W                 | VMA13         |
| YKL010C                                          | UFD4          | YBL072C                 | RPS8A         |
| YLR399C                                          | BDF1          | YMR055C                 | BUB2          |
| YNL248C                                          | RPA49         | YNL107W                 | YAF9          |
| YAL024C                                          | LTE1          | YNL041C                 | COG6          |
| YMR224C                                          | MRE11         | YLR370C                 | ARC18         |
| YPL227C                                          | ALG5          | YMR214W                 | SCJ1          |
| YLR234W                                          | TOP3          | YBR171W                 | SEC66         |
| YIL159W                                          | BNR1          | YFL023W                 | BUD27         |

| Predictions at threshold level 0.75 continued... |               |                         |               |
|--------------------------------------------------|---------------|-------------------------|---------------|
| Gene1 of predicted pair                          |               | Gene2 of predicted pair |               |
| Systematic Name                                  | Standard Name | Systematic Name         | Standard Name |
| YML095C                                          | RAD10         | YNL229C                 | URE2          |
| YDR174W                                          | HMO1          | YLR410W                 | VIP1          |
| YPL256C                                          | CLN2          | YEL036C                 | ANP1          |
| YFR031C-A                                        | RPL2A         | YBL103C                 | RTG3          |
| YBL021C                                          | HAP3          | YDR155C                 | CPR1          |
| YDL185W                                          | TFP1          | YEL051W                 | VMA8          |
| YDR320C                                          | SWA2          | YGL054C                 | ERV14         |
| YPR036W                                          | VMA13         | YGL212W                 | VAM7          |
| YIL034C                                          | CAP2          | YHR178W                 | STB5          |
| YKL007W                                          | CAP1          | YNL293W                 | MSB3          |
| YJR032W                                          | CPR7          | YPL195W                 | APL5          |
| YMR202W                                          | ERG2          | YPL018W                 | CTF19         |
| YFR034C                                          | PHO4          | YDR363W-A               | SEM1          |
| YMR026C                                          | PEX12         | YJR032W                 | CPR7          |
| YPL120W                                          | VPS30         | YOL018C                 | TLG2          |
| YDR320C                                          | SWA2          | YJL004C                 | SYS1          |
| YNL106C                                          | INP52         | YOR284W                 | HUA2          |
| YDL042C                                          | SIR2          | YML109W                 | ZDS2          |
| YLL007C                                          | YLL007C       | YJL095W                 | BCK1          |
| YJR135C                                          | MCM22         | YOR141C                 | ARP8          |
| YKL117W                                          | SBA1          | YGR059W                 | SPR3          |
| YHR200W                                          | RPN10         | YPL018W                 | CTF19         |
| YKL025C                                          | PAN3          | YHL002W                 | HSE1          |
| YCR086W                                          | CSM1          | YAR014C                 | BUD14         |
| YGL078C                                          | DBP3          | YNL076W                 | MKS1          |
| YPL018W                                          | CTF19         | YNL116W                 | DMA2          |
| YKL116C                                          | PRR1          | YLR320W                 | MMS22         |
| YPR084W                                          | YPR084W       | YOR327C                 | SNC2          |
| YDL160C                                          | DHH1          | YLR079W                 | SIC1          |

| Predictions at threshold level 0.75 continued... |               |                         |               |
|--------------------------------------------------|---------------|-------------------------|---------------|
| Gene1 of predicted pair                          |               | Gene2 of predicted pair |               |
| Systematic Name                                  | Standard Name | Systematic Name         | Standard Name |
| YGL054C                                          | ERV14         | YDL006W                 | PTC1          |
| YDR097C                                          | MSH6          | YFR010W                 | UBP6          |
| YDR439W                                          | LRS4          | YPR120C                 | CLB5          |
| YMR133W                                          | REC114        | YOL121C                 | RPS19A        |
| YML117W                                          | NAB6          | YJL183W                 | MNN11         |
| YOR069W                                          | VPS5          | YDR358W                 | GGA1          |
| YMR095C                                          | SNO1          | YNL307C                 | MCK1          |
| YER110C                                          | KAP123        | YGL151W                 | NUT1          |
| YPR036W                                          | VMA13         | YMR230W                 | RPS10B        |
| YOR195W                                          | SLK19         | YKR057W                 | RPS21A        |
| YBR290W                                          | BSD2          | YMR109W                 | MYO5          |
| YPR120C                                          | CLB5          | YDR310C                 | SUM1          |
| YGL033W                                          | HOP2          | YOL111C                 | MDY2          |
| YBL103C                                          | RTG3          | YNR072W                 | HXT17         |
| YEL053C                                          | MAK10         | YER122C                 | GLO3          |
| YLR447C                                          | VMA6          | YDR155C                 | CPR1          |
| YER144C                                          | UBP5          | YNL058C                 | YNL058C       |
| YCR077C                                          | PAT1          | YNL147W                 | LSM7          |
| YBR171W                                          | SEC66         | YPL195W                 | APL5          |
| YLR386W                                          | VAC14         | YMR214W                 | SCJ1          |
| YHR205W                                          | SCH9          | YMR311C                 | GLC8          |
| YPL057C                                          | SUR1          | YBR107C                 | IML3          |
| YDR443C                                          | SSN2          | YLR095C                 | IOC2          |
| YIL159W                                          | BNR1          | YPR046W                 | MCM16         |
| YDR358W                                          | GGA1          | YMR152W                 | YIM1          |
| YGL133W                                          | ITC1          | YDL047W                 | SIT4          |
| YMR231W                                          | PEP5          | YLR352W                 | YLR352W       |
| YOL126C                                          | MDH2          | YJR059W                 | PTK2          |
| YGR249W                                          | MGA1          | YKL116C                 | PRR1          |

| Predictions at threshold level 0.75 continued... |               |                         |               |
|--------------------------------------------------|---------------|-------------------------|---------------|
| Gene1 of predicted pair                          |               | Gene2 of predicted pair |               |
| Systematic Name                                  | Standard Name | Systematic Name         | Standard Name |
| YPR029C                                          | APL4          | YHR108W                 | GGA2          |
| YMR022W                                          | UBC7          | YDL047W                 | SIT4          |
| YOR109W                                          | INP53         | YAL002W                 | VPS8          |
| YDR174W                                          | HMO1          | YOR141C                 | ARP8          |
| YDL154W                                          | MSH5          | YHR079C-A               | SAE3          |
| YHL020C                                          | OPI1          | YKR030W                 | GMH1          |
| YOR290C                                          | SNF2          | YLR306W                 | UBC12         |
| YDR443C                                          | SSN2          | YLR398C                 | SKI2          |
| YOR033C                                          | EXO1          | YJL187C                 | SWE1          |
| YNL199C                                          | GCR2          | YDR440W                 | DOT1          |
| YML016C                                          | PPZ1          | YLR410W                 | VIP1          |
| YDR108W                                          | GSG1          | YNL127W                 | FAR11         |
| YBR112C                                          | CYC8          | YOR140W                 | SFL1          |
| YER144C                                          | UBP5          | YLR441C                 | RPS1A         |
| YMR116C                                          | ASC1          | YKL048C                 | ELM1          |
| YDL020C                                          | RPN4          | YDR137W                 | RGP1          |
| YCR077C                                          | PAT1          | YLR370C                 | ARC18         |
| YDR004W                                          | RAD57         | YML103C                 | NUP188        |
| YNL248C                                          | RPA49         | YJR063W                 | RPA12         |
| YOR290C                                          | SNF2          | YLR093C                 | NYV1          |
| YOR195W                                          | SLK19         | YJL136C                 | RPS21B        |
| YMR172W                                          | HOT1          | YDR293C                 | SSD1          |
| YDR137W                                          | RGP1          | YER122C                 | GLO3          |
| YIL159W                                          | BNR1          | YDL083C                 | RPS16B        |
| YGR019W                                          | UGA1          | YOL067C                 | RTG1          |
| YHR134W                                          | WSS1          | YDL013W                 | SLX5          |
| YPL234C                                          | TFP3          | YPL120W                 | VPS30         |
| YPL161C                                          | BEM4          | YGR054W                 | YGR054W       |
| YKR048C                                          | NAP1          | YDL047W                 | SIT4          |

| Predictions at threshold level 0.75 continued... |               |                         |               |
|--------------------------------------------------|---------------|-------------------------|---------------|
| Gene1 of predicted pair                          |               | Gene2 of predicted pair |               |
| Systematic Name                                  | Standard Name | Systematic Name         | Standard Name |
| YOR132W                                          | VPS17         | YHR114W                 | BZZ1          |
| YLR119W                                          | SRN2          | YEL053C                 | MAK10         |
| YJL124C                                          | LSM1          | YJR063W                 | RPA12         |
| YPL018W                                          | CTF19         | YAR014C                 | BUD14         |
| YPL161C                                          | BEM4          | YBR036C                 | CSG2          |
| YAL010C                                          | MDM10         | YHR115C                 | DMA1          |
| YLR452C                                          | SST2          | YPL137C                 | GIP3          |
| YLR192C                                          | HCR1          | YDR358W                 | GGA1          |
| YDL042C                                          | SIR2          | YDR440W                 | DOT1          |
| YGR072W                                          | UPF3          | YER162C                 | RAD4          |
| YAL024C                                          | LTE1          | YJL095W                 | BCK1          |
| YBR290W                                          | BSD2          | YJL190C                 | RPS22A        |
| YGL115W                                          | SNF4          | YAL002W                 | VPS8          |
| YJL136C                                          | RPS21B        | YBL047C                 | EDE1          |
| YNL215W                                          | IES2          | YLR410W                 | VIP1          |
| YLL039C                                          | UBI4          | YKL032C                 | IXR1          |
| YGL054C                                          | ERV14         | YAR014C                 | BUD14         |
| YOL111C                                          | MDY2          | YOR327C                 | SNC2          |
| YHR178W                                          | STB5          | YER139C                 | YER139C       |
| YDR202C                                          | RAV2          | YJR033C                 | RAV1          |
| YJL127C                                          | SPT10         | YDL226C                 | GCS1          |
| YNL229C                                          | URE2          | YGL163C                 | RAD54         |
| YDR202C                                          | RAV2          | YMR054W                 | STV1          |
| YER173W                                          | RAD24         | YGL100W                 | SEH1          |
| YBR217W                                          | ATG12         | YML001W                 | YPT7          |
| YNL106C                                          | INP52         | YDR378C                 | LSM6          |
| YOR270C                                          | VPH1          | YGL025C                 | PGD1          |
| YGR097W                                          | ASK10         | YNL025C                 | SSN8          |
| YDR289C                                          | RTT103        | YOR141C                 | ARP8          |

| Predictions at threshold level 0.75 continued... |               |                         |               |
|--------------------------------------------------|---------------|-------------------------|---------------|
| Gene1 of predicted pair                          |               | Gene2 of predicted pair |               |
| Systematic Name                                  | Standard Name | Systematic Name         | Standard Name |
| YDL077C                                          | VAM6          | YNL127W                 | FAR11         |
| YIR003W                                          | YIR003W       | YOR284W                 | HUA2          |
| YDL020C                                          | RPN4          | YJR140C                 | HIR3          |
| YLR079W                                          | SIC1          | YLR425W                 | TUS1          |
| YPR120C                                          | CLB5          | YLR254C                 | NDL1          |
| YBR173C                                          | UMP1          | YMR214W                 | SCJ1          |
| YCL067C                                          | HMLALPHA2     | YBR112C                 | CYC8          |
| YDR318W                                          | MCM21         | YLR370C                 | ARC18         |
| YPL024W                                          | RMI1          | YNL032W                 | SIW14         |
| YOR069W                                          | VPS5          | YER162C                 | RAD4          |
| YDR137W                                          | RGP1          | YBR171W                 | SEC66         |
| YDR174W                                          | HMO1          | YBR228W                 | SLX1          |
| YKL126W                                          | YPK1          | YNL238W                 | KEX2          |
| YMR055C                                          | BUB2          | YJR084W                 | CSN12         |
| YKL007W                                          | CAP1          | YIL034C                 | CAP2          |
| YHL022C                                          | SPO11         | YGL213C                 | SKI8          |
| YPL024W                                          | RMI1          | YDL002C                 | NHP10         |
| YPR046W                                          | MCM16         | YDR318W                 | MCM21         |
| YHR156C                                          | LIN1          | YJL172W                 | CPS1          |
| YDR443C                                          | SSN2          | YLR094C                 | GIS3          |
| YDL184C                                          | RPL41A        | YML001W                 | YPT7          |
| YFR010W                                          | UBP6          | YBR108W                 | YBR108W       |
| YDR443C                                          | SSN2          | YDL223C                 | HBT1          |
| YBR217W                                          | ATG12         | YPL037C                 | EGD1          |
| YDR443C                                          | SSN2          | YBL075C                 | SSA3          |
| YBR131W                                          | CCZ1          | YJL095W                 | BCK1          |
| YGL237C                                          | HAP2          | YCR086W                 | CSM1          |
| YER044C                                          | ERG28         | YPR046W                 | MCM16         |
| YPL161C                                          | BEM4          | YMR054W                 | STV1          |



| Predictions at threshold level 0.75 continued... |               |                         |               |
|--------------------------------------------------|---------------|-------------------------|---------------|
| Gene1 of predicted pair                          |               | Gene2 of predicted pair |               |
| Systematic Name                                  | Standard Name | Systematic Name         | Standard Name |
| YPL024W                                          | RMI1          | YPR120C                 | CLB5          |
| YLR337C                                          | VRP1          | YDR440W                 | DOT1          |
| YDR477W                                          | SNF1          | YMR133W                 | REC114        |
| YHR156C                                          | LIN1          | YNL076W                 | MKS1          |
| YLR234W                                          | TOP3          | YNL291C                 | MID1          |
| YMR142C                                          | RPL13B        | YLR371W                 | ROM2          |
| YGR249W                                          | MGA1          | YDL223C                 | HBT1          |
| YPL105C                                          | YPL105C       | YER122C                 | GLO3          |
| YCR020C-A                                        | MAK31         | YOR327C                 | SNC2          |
| YBL103C                                          | RTG3          | YJR084W                 | CSN12         |
| YER054C                                          | GIP2          | YIL045W                 | PIG2          |
| YIL076W                                          | SEC28         | YOR327C                 | SNC2          |
| YLL039C                                          | UBI4          | YJR125C                 | ENT3          |
| YLR093C                                          | NYV1          | YBR019C                 | GAL10         |
| YNL087W                                          | TCB2          | YJR056C                 | YJR056C       |
| YLR016C                                          | PML1          | YHR152W                 | SPO12         |
| YDR174W                                          | HMO1          | YDR378C                 | LSM6          |
| YPR017C                                          | DSS4          | YHL031C                 | GOS1          |
| YGL250W                                          | RMR1          | YGR188C                 | BUB1          |
| YCL032W                                          | STE50         | YER118C                 | SHO1          |
| YPL120W                                          | VPS30         | YPR119W                 | CLB2          |
| YOR001W                                          | RRP6          | YBR009C                 | HHF1          |
| YJL036W                                          | SNX4          | YEL051W                 | VMA8          |
| YHR073W                                          | OSH3          | YGR059W                 | SPR3          |
| YNL201C                                          | PSY2          | YML103C                 | NUP188        |
| YGL223C                                          | COG1          | YGL200C                 | EMP24         |
| YBR200W                                          | BEM1          | YDL223C                 | HBT1          |
| YLR170C                                          | APS1          | YAL030W                 | SNC1          |
| YOR080W                                          | DIA2          | YOL030W                 | GAS5          |

| Predictions at threshold level 0.75 continued... |               |                         |               |
|--------------------------------------------------|---------------|-------------------------|---------------|
| Gene1 of predicted pair                          |               | Gene2 of predicted pair |               |
| Systematic Name                                  | Standard Name | Systematic Name         | Standard Name |
| YMR109W                                          | MYO5          | YER122C                 | GLO3          |
| YPL195W                                          | APL5          | YLR370C                 | ARC18         |
| YLR292C                                          | SEC72         | YBR200W                 | BEM1          |
| YML102W                                          | CAC2          | YDR076W                 | RAD55         |
| YPR131C                                          | NAT3          | YKL068W                 | NUP100        |
| YKL048C                                          | ELM1          | YDR318W                 | MCM21         |
| YLR090W                                          | XDJ1          | YIL076W                 | SEC28         |
| YLR386W                                          | VAC14         | YGR270W                 | YTA7          |
| YGR105W                                          | VMA21         | YML071C                 | COG8          |
| YLR192C                                          | HCR1          | YDR129C                 | SAC6          |
| YPL045W                                          | VPS16         | YGL124C                 | MON1          |
| YPR051W                                          | MAK3          | YEL053C                 | MAK10         |
| YHR111W                                          | UBA4          | YLR182W                 | SWI6          |
| YDR477W                                          | SNF1          | YER116C                 | SLX8          |
| YBL058W                                          | SHP1          | YDR484W                 | VPS52         |
| YJL183W                                          | MNN11         | YKL080W                 | VMA5          |
| YDL116W                                          | NUP84         | YER115C                 | SPR6          |
| YFL023W                                          | BUD27         | YMR133W                 | REC114        |
| YJR140C                                          | HIR3          | YOL081W                 | IRA2          |
| YMR153W                                          | NUP53         | YMR133W                 | REC114        |
| YLR381W                                          | CTF3          | YML095C                 | RAD10         |
| YJL172W                                          | CPS1          | YDR137W                 | RGP1          |
| YLR083C                                          | EMP70         | YPR032W                 | SRO7          |
| YER044C                                          | ERG28         | YMR230W                 | RPS10B        |
| YLR192C                                          | HCR1          | YOR290C                 | SNF2          |
| YJL004C                                          | SYS1          | YER122C                 | GLO3          |
| YOR304W                                          | ISW2          | YMR139W                 | RIM11         |
| YML013W                                          | UBX2          | YGR188C                 | BUB1          |
| YDR289C                                          | RTT103        | YPL018W                 | CTF19         |

| Predictions at threshold level 0.75 continued... |               |                         |               |
|--------------------------------------------------|---------------|-------------------------|---------------|
| Gene1 of predicted pair                          |               | Gene2 of predicted pair |               |
| Systematic Name                                  | Standard Name | Systematic Name         | Standard Name |
| YGR270W                                          | YTA7          | YDR183W                 | PLP1          |
| YJL053W                                          | PEP8          | YLR309C                 | IMH1          |
| YHR134W                                          | WSS1          | YPR051W                 | MAK3          |
| YDR363W-A                                        | SEM1          | YCR077C                 | PAT1          |
| YOR290C                                          | SNF2          | YMR133W                 | REC114        |
| YPL161C                                          | BEM4          | YDR183W                 | PLP1          |
| YOR043W                                          | WHI2          | YLR180W                 | SAM1          |
| YGL135W                                          | RPL1B         | YOR080W                 | DIA2          |
| YNL087W                                          | TCB2          | YMR133W                 | REC114        |
| YFR010W                                          | UBP6          | YDL192W                 | ARF1          |
| YBL101C                                          | ECM21         | YOL081W                 | IRA2          |
| YBR041W                                          | FAT1          | YJL052W                 | TDH1          |
| YOR358W                                          | HAP5          | YDR289C                 | RTT103        |
| YOR290C                                          | SNF2          | YDL083C                 | RPS16B        |
| YMR231W                                          | PEP5          | YHR010W                 | RPL27A        |
| YBR173C                                          | UMP1          | YMR055C                 | BUB2          |
| YCR063W                                          | BUD31         | YPR101W                 | SNT309        |
| YLR119W                                          | SRN2          | YDL223C                 | HBT1          |
| YGR072W                                          | UPF3          | YGL212W                 | VAM7          |
| YJL036W                                          | SNX4          | YNR032W                 | PPG1          |
| YBR108W                                          | YBR108W       | YJR090C                 | GRR1          |
| YPR018W                                          | RLF2          | YDR254W                 | CHL4          |
| YML117W                                          | NAB6          | YLR371W                 | ROM2          |
| YNL243W                                          | SLA2          | YNL094W                 | APP1          |
| YML115C                                          | VAN1          | YOR270C                 | VPH1          |
| YML103C                                          | NUP188        | YDR289C                 | RTT103        |
| YLR090W                                          | XDJ1          | YPL024W                 | RMI1          |
| YDR076W                                          | RAD55         | YDR207C                 | UME6          |
| YDR293C                                          | SSD1          | YNL293W                 | MSB3          |

| Predictions at threshold level 0.75 continued... |               |                         |               |
|--------------------------------------------------|---------------|-------------------------|---------------|
| Gene1 of predicted pair                          |               | Gene2 of predicted pair |               |
| Systematic Name                                  | Standard Name | Systematic Name         | Standard Name |
| YPR189W                                          | SKI3          | YGL213C                 | SKI8          |
| YIR002C                                          | MPH1          | YPR119W                 | CLB2          |
| YDL155W                                          | CLB3          | YNL107W                 | YAF9          |
| YBL058W                                          | SHP1          | YFR010W                 | UBP6          |
| YPL253C                                          | VIK1          | YML028W                 | TSA1          |
| YBR030W                                          | YBR030W       | YGL003C                 | CDH1          |
| YDR137W                                          | RGP1          | YNL044W                 | YIP3          |
| YMR224C                                          | MRE11         | YNL206C                 | RTT106        |
| YBR019C                                          | GAL10         | YDL192W                 | ARF1          |
| YPL042C                                          | SSN3          | YGL003C                 | CDH1          |
| YGL190C                                          | CDC55         | YML094W                 | GIM5          |
| YHR098C                                          | SFB3          | YLR039C                 | RIC1          |
| YGL174W                                          | BUD13         | YEL013W                 | VAC8          |
| YIL076W                                          | SEC28         | YML071C                 | COG8          |
| YDL135C                                          | RDI1          | YPL112C                 | PEX25         |
| YBR131W                                          | CCZ1          | YLR371W                 | ROM2          |
| YHL031C                                          | GOS1          | YML038C                 | YMD8          |
| YDR507C                                          | GIN4          | YDR422C                 | SIP1          |
| YDR195W                                          | REF2          | YAR014C                 | BUD14         |
| YBL047C                                          | EDE1          | YEL036C                 | ANP1          |
| YMR039C                                          | SUB1          | YHR178W                 | STB5          |
| YNL238W                                          | KEX2          | YKL119C                 | VPH2          |
| YDR245W                                          | MNN10         | YPL158C                 | YPL158C       |
| YDR358W                                          | GGA1          | YER122C                 | GLO3          |
| YDR261C                                          | EXG2          | YBR036C                 | CSG2          |
| YLR095C                                          | IOC2          | YLR371W                 | ROM2          |
| YMR216C                                          | SKY1          | YER162C                 | RAD4          |
| YLR090W                                          | XDJ1          | YBL025W                 | RRN10         |
| YGR261C                                          | APL6          | YDR153C                 | ENT5          |

| Predictions at threshold level 0.75 continued... |               |                         |               |
|--------------------------------------------------|---------------|-------------------------|---------------|
| Gene1 of predicted pair                          |               | Gene2 of predicted pair |               |
| Systematic Name                                  | Standard Name | Systematic Name         | Standard Name |
| YDL160C                                          | DHH1          | YER027C                 | GAL83         |
| YJL036W                                          | SNX4          | YOL018C                 | TLG2          |
| YPL105C                                          | YPL105C       | YER162C                 | RAD4          |
| YPL161C                                          | BEM4          | YIL008W                 | URM1          |
| YGL087C                                          | MMS2          | YDR289C                 | RTT103        |
| YLR119W                                          | SRN2          | YMR224C                 | MRE11         |
| YJL030W                                          | MAD2          | YIL033C                 | BCY1          |
| YAL024C                                          | LTE1          | YDR289C                 | RTT103        |
| YLR083C                                          | EMP70         | YDL006W                 | PTC1          |
| YHR111W                                          | UBA4          | YDR318W                 | MCM21         |
| YLR441C                                          | RPS1A         | YLR398C                 | SKI2          |
| YER087C-B                                        | SBH1          | YNL044W                 | YIP3          |
| YAL024C                                          | LTE1          | YDR156W                 | RPA14         |
| YGR097W                                          | ASK10         | YGR104C                 | SRB5          |
| YBL047C                                          | EDE1          | YKR020W                 | VPS51         |
| YPL024W                                          | RMI1          | YKL101W                 | HSL1          |
| YOR127W                                          | RGA1          | YOR327C                 | SNC2          |
| YBR217W                                          | ATG12         | YFL023W                 | BUD27         |
| YOR127W                                          | RGA1          | YJR040W                 | GEF1          |
| YOL126C                                          | MDH2          | YER110C                 | KAP123        |
| YNR052C                                          | POP2          | YML028W                 | TSA1          |
| YIL159W                                          | BNR1          | YPL195W                 | APL5          |
| YNL243W                                          | SLA2          | YOR032C                 | HMS1          |
| YDL184C                                          | RPL41A        | YNR072W                 | HXT17         |
| YLR095C                                          | IOC2          | YHR200W                 | RPN10         |
| YNL218W                                          | MGS1          | YNL106C                 | INP52         |
| YMR039C                                          | SUB1          | YLR234W                 | TOP3          |
| YOR195W                                          | SLK19         | YPL253C                 | VIK1          |
| YAL024C                                          | LTE1          | YOR327C                 | SNC2          |

| Predictions at threshold level 0.75 continued... |               |                         |               |
|--------------------------------------------------|---------------|-------------------------|---------------|
| Gene1 of predicted pair                          |               | Gene2 of predicted pair |               |
| Systematic Name                                  | Standard Name | Systematic Name         | Standard Name |
| YDR293C                                          | SSD1          | YGR072W                 | UPF3          |
| YEL050C                                          | RML2          | YPR120C                 | CLB5          |
| YPL161C                                          | BEM4          | YDR207C                 | UME6          |
| YPR051W                                          | MAK3          | YDL155W                 | CLB3          |
| YKL129C                                          | MYO3          | YBR260C                 | RGD1          |
| YOR141C                                          | ARP8          | YOL091W                 | SPO21         |
| YBL102W                                          | SFT2          | YNL127W                 | FAR11         |
| YOR035C                                          | SHE4          | YJL095W                 | BCK1          |
| YJR140C                                          | HIR3          | YPR120C                 | CLB5          |
| YMR026C                                          | PEX12         | YMR152W                 | YIM1          |
| YJR135C                                          | MCM22         | YNL107W                 | YAF9          |
| YMR172W                                          | HOT1          | YMR109W                 | MYO5          |
| YBR173C                                          | UMP1          | YPR119W                 | CLB2          |
| YOR275C                                          | RIM20         | YBR082C                 | UBC4          |
| YBL021C                                          | HAP3          | YDR289C                 | RTT103        |
| YGL033W                                          | HOP2          | YDL083C                 | RPS16B        |
| YBR108W                                          | YBR108W       | YBL025W                 | RRN10         |
| YHR111W                                          | UBA4          | YJL183W                 | MNN11         |
| YNL199C                                          | GCR2          | YLR371W                 | ROM2          |
| YOR080W                                          | DIA2          | YDR245W                 | MNN10         |
| YDR183W                                          | PLP1          | YAL002W                 | VPS8          |
| YKL032C                                          | IXR1          | YNL079C                 | TPM1          |
| YLR234W                                          | TOP3          | YJL183W                 | MNN11         |
| YBR200W                                          | BEM1          | YER124C                 | DSE1          |
| YOR033C                                          | EXO1          | YGL163C                 | RAD54         |
| YFR031C-A                                        | RPL2A         | YKL116C                 | PRR1          |
| YNL031C                                          | HHT2          | YJL140W                 | RPB4          |
| YBR173C                                          | UMP1          | YPL037C                 | EGD1          |
| YOR308C                                          | SNU66         | YER122C                 | GLO3          |

| Predictions at threshold level 0.75 continued... |               |                         |               |
|--------------------------------------------------|---------------|-------------------------|---------------|
| Gene1 of predicted pair                          |               | Gene2 of predicted pair |               |
| Systematic Name                                  | Standard Name | Systematic Name         | Standard Name |
| YPR017C                                          | DSS4          | YPR032W                 | SRO7          |
| YHR081W                                          | LRP1          | YMR311C                 | GLC8          |
| YLR399C                                          | BDF1          | YBR010W                 | HHT1          |
| YDR289C                                          | RTT103        | YBR114W                 | RAD16         |
| YGL147C                                          | RPL9A         | YJL183W                 | MNN11         |
| YJL124C                                          | LSM1          | YDR335W                 | MSN5          |
| YHL031C                                          | GOS1          | YJR033C                 | RAV1          |
| YMR095C                                          | SNO1          | YGR249W                 | MGA1          |
| YOR375C                                          | GDH1          | YPL161C                 | BEM4          |
| YFR031C-A                                        | RPL2A         | YEL060C                 | PRB1          |
| YPL001W                                          | HAT1          | YDR310C                 | SUM1          |
| YKL007W                                          | CAP1          | YPR119W                 | CLB2          |
| YKR014C                                          | YPT52         | YML097C                 | VPS9          |
| YPL022W                                          | RAD1          | YJR005W                 | APL1          |
| YMR004W                                          | MVP1          | YHR039C-A               | VMA10         |
| YDR443C                                          | SSN2          | YGL147C                 | RPL9A         |
| YGR270W                                          | YTA7          | YGL163C                 | RAD54         |
| YNL236W                                          | SIN4          | YJL006C                 | CTK2          |
| YLR061W                                          | RPL22A        | YMR198W                 | CIK1          |
| YLR447C                                          | VMA6          | YHR111W                 | UBA4          |
| YJR056C                                          | YJR056C       | YPL037C                 | EGD1          |
| YFR031C-A                                        | RPL2A         | YGL147C                 | RPL9A         |
| YER115C                                          | SPR6          | YKR024C                 | DBP7          |
| YGL115W                                          | SNF4          | YPL234C                 | TFP3          |
| YPL161C                                          | BEM4          | YBL025W                 | RRN10         |
| YPR051W                                          | MAK3          | YOL108C                 | INO4          |
| YJR063W                                          | RPA12         | YGR270W                 | YTA7          |
| YDL160C                                          | DHH1          | YGL003C                 | CDH1          |
| YHR156C                                          | LIN1          | YER144C                 | UBP5          |

| Predictions at threshold level 0.75 continued... |               |                         |               |
|--------------------------------------------------|---------------|-------------------------|---------------|
| Gene1 of predicted pair                          |               | Gene2 of predicted pair |               |
| Systematic Name                                  | Standard Name | Systematic Name         | Standard Name |
| YFR031C-A                                        | RPL2A         | YPL161C                 | BEM4          |
| YKL116C                                          | PRR1          | YDR484W                 | VPS52         |
| YKR072C                                          | SIS2          | YML095C                 | RAD10         |
| YMR095C                                          | SNO1          | YOR043W                 | WHI2          |
| YJL124C                                          | LSM1          | YNL225C                 | CNM67         |
| YNL058C                                          | YNL058C       | YBR019C                 | GAL10         |
| YKL110C                                          | KTI12         | YDR183W                 | PLP1          |
| YKL048C                                          | ELM1          | YOR327C                 | SNC2          |
| YBR131W                                          | CCZ1          | YJL183W                 | MNN11         |
| YBL087C                                          | RPL23A        | YDL047W                 | SIT4          |
| YNL206C                                          | RTT106        | YBR009C                 | HHF1          |
| YOR039W                                          | CKB2          | YMR167W                 | MLH1          |
| YNL218W                                          | MGS1          | YDL101C                 | DUN1          |
| YMR016C                                          | SOK2          | YOL111C                 | MDY2          |
| YHR010W                                          | RPL27A        | YMR038C                 | CCS1          |
| YNL058C                                          | YNL058C       | YEL053C                 | MAK10         |
| YIL036W                                          | CST6          | YLR398C                 | SKI2          |
| YGR040W                                          | KSS1          | YBL016W                 | FUS3          |
| YOR080W                                          | DIA2          | YCL037C                 | SRO9          |
| YDR146C                                          | SWI5          | YPL256C                 | CLN2          |
| YHL020C                                          | OPI1          | YGL054C                 | ERV14         |
| YPR051W                                          | MAK3          | YER162C                 | RAD4          |
| YGL178W                                          | MPT5          | YML041C                 | VPS71         |
| YMR224C                                          | MRE11         | YDR358W                 | GGA1          |
| YOR035C                                          | SHE4          | YER040W                 | GLN3          |
| YJL154C                                          | VPS35         | YGR188C                 | BUB1          |
| YDL223C                                          | HBT1          | YEL053C                 | MAK10         |
| YOR043W                                          | WHI2          | YHR081W                 | LRP1          |
| YOR337W                                          | TEA1          | YOR290C                 | SNF2          |



| Predictions at threshold level 0.75 continued... |               |                         |               |
|--------------------------------------------------|---------------|-------------------------|---------------|
| Gene1 of predicted pair                          |               | Gene2 of predicted pair |               |
| Systematic Name                                  | Standard Name | Systematic Name         | Standard Name |
| YPL047W                                          | SGF11         | YER107C                 | GLE2          |
| YGR270W                                          | YTA7          | YOL067C                 | RTG1          |
| YOR290C                                          | SNF2          | YEL053C                 | MAK10         |
| YOL006C                                          | TOP1          | YGL095C                 | VPS45         |
| YLR396C                                          | VPS33         | YDR323C                 | PEP7          |
| YKL025C                                          | PAN3          | YDL020C                 | RPN4          |
| YNR072W                                          | HXT17         | YPL161C                 | BEM4          |
| YLR371W                                          | ROM2          | YLR324W                 | PEX30         |
| YGL087C                                          | MMS2          | YGR054W                 | YGR054W       |
| YKL025C                                          | PAN3          | YOL067C                 | RTG1          |
| YCR020W-B                                        | HTL1          | YGR275W                 | RTT102        |
| YKR059W                                          | TIF1          | YJL138C                 | TIF2          |
| YDL116W                                          | NUP84         | YIL103W                 | DPH1          |
| YPR017C                                          | DSS4          | YNL051W                 | COG5          |
| YDR448W                                          | ADA2          | YOR038C                 | HIR2          |
| YGL033W                                          | HOP2          | YML115C                 | VAN1          |
| YIL053W                                          | RHR2          | YBR108W                 | YBR108W       |
| YJR060W                                          | CBF1          | YGR135W                 | PRE9          |
| YPL057C                                          | SUR1          | YMR038C                 | CCS1          |
| YMR127C                                          | SAS2          | YGR054W                 | YGR054W       |
| YNL215W                                          | IES2          | YBR195C                 | MSI1          |
| YIL076W                                          | SEC28         | YJR040W                 | GEF1          |
| YOR132W                                          | VPS17         | YKL119C                 | VPH2          |
| YPR084W                                          | YPR084W       | YJR040W                 | GEF1          |
| YPR131C                                          | NAT3          | YDL059C                 | RAD59         |
| YOL145C                                          | CTR9          | YNL031C                 | HHT2          |
| YDL002C                                          | NHP10         | YDR310C                 | SUM1          |
| YAL024C                                          | LTE1          | YBR108W                 | YBR108W       |
| YDR395W                                          | SXM1          | YNL069C                 | RPL16B        |

| Predictions at threshold level 0.75 continued... |               |                         |               |
|--------------------------------------------------|---------------|-------------------------|---------------|
| Gene1 of predicted pair                          |               | Gene2 of predicted pair |               |
| Systematic Name                                  | Standard Name | Systematic Name         | Standard Name |
| YJR056C                                          | YJR056C       | YMR230W                 | RPS10B        |
| YMR026C                                          | PEX12         | YGL078C                 | DBP3          |
| YJL036W                                          | SNX4          | YAR014C                 | BUD14         |
| YMR116C                                          | ASC1          | YPL213W                 | LEA1          |
| YBR107C                                          | IML3          | YLR315W                 | NKP2          |
| YFL023W                                          | BUD27         | YER162C                 | RAD4          |
| YAL024C                                          | LTE1          | YPL001W                 | HAT1          |
| YEL053C                                          | MAK10         | YOL121C                 | RPS19A        |
| YOR337W                                          | TEA1          | YER139C                 | YER139C       |
| YNL032W                                          | SIW14         | YPL037C                 | EGD1          |
| YBR181C                                          | RPS6B         | YAL002W                 | VPS8          |
| YMR172W                                          | HOT1          | YBL051C                 | PIN4          |
| YDR484W                                          | VPS52         | YML071C                 | COG8          |
| YHR060W                                          | VMA22         | YHL020C                 | OPI1          |
| YBR260C                                          | RGD1          | YHR012W                 | VPS29         |
| YKL160W                                          | ELF1          | YER122C                 | GLO3          |
| YNL206C                                          | RTT106        | YNL116W                 | DMA2          |
| YDR443C                                          | SSN2          | YLR079W                 | SIC1          |
| YBR278W                                          | DPB3          | YDR310C                 | SUM1          |
| YCR002C                                          | CDC10         | YBL085W                 | BOI1          |
| YBR030W                                          | YBR030W       | YGL115W                 | SNF4          |
| YBR228W                                          | SLX1          | YLR135W                 | SLX4          |
| YPL018W                                          | CTF19         | YML112W                 | CTK3          |
| YDL042C                                          | SIR2          | YNL206C                 | RTT106        |
| YDL223C                                          | HBT1          | YBL067C                 | UBP13         |
| YDR293C                                          | SSD1          | YPR032W                 | SRO7          |
| YKL139W                                          | CTK1          | YOR195W                 | SLK19         |
| YFR010W                                          | UBP6          | YNL058C                 | YNL058C       |
| YHL031C                                          | GOS1          | YPL105C                 | YPL105C       |

| Predictions at threshold level 0.75 continued... |               |                         |               |
|--------------------------------------------------|---------------|-------------------------|---------------|
| Gene1 of predicted pair                          |               | Gene2 of predicted pair |               |
| Systematic Name                                  | Standard Name | Systematic Name         | Standard Name |
| YNL288W                                          | CAF40         | YLR233C                 | EST1          |
| YNR072W                                          | HXT17         | YLR094C                 | GIS3          |
| YPR036W                                          | VMA13         | YOR043W                 | WHI2          |
| YJR135C                                          | MCM22         | YJR005W                 | APL1          |
| YOR195W                                          | SLK19         | YPL022W                 | RAD1          |
| YGR104C                                          | SRB5          | YNL248C                 | RPA49         |
| YNL243W                                          | SLA2          | YLR268W                 | SEC22         |
| YDR137W                                          | RGP1          | YMR152W                 | YIM1          |
| YMR172W                                          | HOT1          | YEL053C                 | MAK10         |
| YHR060W                                          | VMA22         | YOL108C                 | INO4          |
| YKL139W                                          | CTK1          | YLR370C                 | ARC18         |
| YLR386W                                          | VAC14         | YBR280C                 | SAF1          |
| YNL116W                                          | DMA2          | YNL225C                 | CNM67         |
| YIL034C                                          | CAP2          | YJL154C                 | VPS35         |
| YPL042C                                          | SSN3          | YGL115W                 | SNF4          |
| YFR031C-A                                        | RPL2A         | YDR137W                 | RGP1          |
| YOR043W                                          | WHI2          | YJR032W                 | CPR7          |
| YPL057C                                          | SUR1          | YMR152W                 | YIM1          |
| YLR371W                                          | ROM2          | YLR398C                 | SKI2          |
| YNL180C                                          | RHO5          | YFL047W                 | RGD2          |
| YGL237C                                          | HAP2          | YGL253W                 | HXK2          |
| YER087C-B                                        | SBH1          | YLR292C                 | SEC72         |
| YML095C                                          | RAD10         | YDR155C                 | CPR1          |
| YPL240C                                          | HSP82         | YER102W                 | RPS8B         |
| YLR234W                                          | TOP3          | YDR310C                 | SUM1          |
| YJR060W                                          | CBF1          | YNL051W                 | COG5          |
| YNL087W                                          | TCB2          | YBL103C                 | RTG3          |
| YNL025C                                          | SSN8          | YEL013W                 | VAC8          |
| YGR261C                                          | APL6          | YBL102W                 | SFT2          |

| Predictions at threshold level 0.75 continued... |               |                         |               |
|--------------------------------------------------|---------------|-------------------------|---------------|
| Gene1 of predicted pair                          |               | Gene2 of predicted pair |               |
| Systematic Name                                  | Standard Name | Systematic Name         | Standard Name |
| YPL161C                                          | BEM4          | YML001W                 | YPT7          |
| YDR293C                                          | SSD1          | YGL252C                 | RTG2          |
| YDR146C                                          | SWI5          | YNL236W                 | SIN4          |
| YLR288C                                          | MEC3          | YOR038C                 | HIR2          |
| YBL088C                                          | TEL1          | YLR079W                 | SIC1          |
| YGL006W                                          | PMC1          | YLR043C                 | TRX1          |
| YGL115W                                          | SNF4          | YER162C                 | RAD4          |
| YFL013C                                          | IES1          | YPR119W                 | CLB2          |
| YGR217W                                          | CCH1          | YJL183W                 | MNN11         |
| YJR140C                                          | HIR3          | YHR039C-A               | VMA10         |
| YDR277C                                          | MTH1          | YDL138W                 | RGT2          |
| YNL025C                                          | SSN8          | YFL013C                 | IES1          |
| YNL238W                                          | KEX2          | YLR371W                 | ROM2          |
| YML103C                                          | NUP188        | YNR052C                 | POP2          |
| YGR019W                                          | UGA1          | YDL155W                 | CLB3          |
| YJL127C                                          | SPT10         | YDL155W                 | CLB3          |
| YMR080C                                          | NAM7          | YOR243C                 | PUS7          |
| YLR234W                                          | TOP3          | YJR032W                 | CPR7          |
| YBL047C                                          | EDE1          | YCR077C                 | PAT1          |
| YLR337C                                          | VRP1          | YBL101C                 | ECM21         |
| YDR456W                                          | NHX1          | YPL161C                 | BEM4          |
| YDR245W                                          | MNN10         | YHR200W                 | RPN10         |
| YMR142C                                          | RPL13B        | YEL053C                 | MAK10         |
| YJL124C                                          | LSM1          | YEL013W                 | VAC8          |
| YLR095C                                          | IOC2          | YKL126W                 | YPK1          |
| YDL160C                                          | DHH1          | YPR120C                 | CLB5          |
| YNL215W                                          | IES2          | YML103C                 | NUP188        |
| YEL065W                                          | SIT1          | YOR066W                 | MSA1          |
| YPL115C                                          | BEM3          | YGR152C                 | RSR1          |

| Predictions at threshold level 0.75 continued... |               |                         |               |
|--------------------------------------------------|---------------|-------------------------|---------------|
| Gene1 of predicted pair                          |               | Gene2 of predicted pair |               |
| Systematic Name                                  | Standard Name | Systematic Name         | Standard Name |
| YLR381W                                          | CTF3          | YJR090C                 | GRR1          |
| YJR135C                                          | MCM22         | YDR310C                 | SUM1          |
| YOR033C                                          | EXO1          | YNL016W                 | PUB1          |
| YKR020W                                          | VPS51         | YPL120W                 | VPS30         |
| YPR036W                                          | VMA13         | YLR180W                 | SAM1          |
| YNL069C                                          | RPL16B        | YNL127W                 | FAR11         |
| YJR040W                                          | GEF1          | YGL054C                 | ERV14         |
| YBR289W                                          | SNF5          | YBR009C                 | HHF1          |
| YDR484W                                          | VPS52         | YER162C                 | RAD4          |
| YML016C                                          | PPZ1          | YFR036W                 | CDC26         |
| YDR225W                                          | HTA1          | YPL253C                 | VIK1          |
| YDR004W                                          | RAD57         | YPR046W                 | MCM16         |
| YOR312C                                          | RPL20B        | YOR014W                 | RTS1          |
| YFL026W                                          | STE2          | YDR358W                 | GGA1          |
| YJL136C                                          | RPS21B        | YDR264C                 | AKR1          |
| YDR202C                                          | RAV2          | YPL161C                 | BEM4          |
| YLR006C                                          | SSK1          | YJL187C                 | SWE1          |
| YML095C                                          | RAD10         | YKL101W                 | HSL1          |
| YNL264C                                          | PDR17         | YKL041W                 | VPS24         |
| YGL078C                                          | DBP3          | YKL126W                 | YPK1          |
| YKL032C                                          | IXR1          | YGL200C                 | EMP24         |
| YIR005W                                          | IST3          | YER122C                 | GLO3          |
| YGR184C                                          | UBR1          | YPL253C                 | VIK1          |
| YDR137W                                          | RGP1          | YGR071C                 | YGR071C       |
| YOR066W                                          | MSA1          | YJL183W                 | MNN11         |
| YNL309W                                          | STB1          | YLR182W                 | SWI6          |
| YDR443C                                          | SSN2          | YJL154C                 | VPS35         |
| YMR198W                                          | CIK1          | YIL036W                 | CST6          |
| YBR217W                                          | ATG12         | YML071C                 | COG8          |

| Predictions at threshold level 0.75 continued... |               |                         |               |
|--------------------------------------------------|---------------|-------------------------|---------------|
| Gene1 of predicted pair                          |               | Gene2 of predicted pair |               |
| Systematic Name                                  | Standard Name | Systematic Name         | Standard Name |
| YKL025C                                          | PAN3          | YLR360W                 | VPS38         |
| YNL243W                                          | SLA2          | YJL030W                 | MAD2          |
| YOR109W                                          | INP53         | YOR036W                 | PEP12         |
| YML057W                                          | CMP2          | YPR119W                 | CLB2          |
| YML071C                                          | COG8          | YLR398C                 | SKI2          |
| YHR161C                                          | YAP1801       | YJL029C                 | VPS53         |
| YKR099W                                          | BAS1          | YLR180W                 | SAM1          |
| YMR198W                                          | CIK1          | YPR036W                 | VMA13         |
| YLR234W                                          | TOP3          | YCR066W                 | RAD18         |
| YLR429W                                          | CRN1          | YPR120C                 | CLB5          |
| YDR378C                                          | LSM6          | YNL116W                 | DMA2          |
| YLR292C                                          | SEC72         | YDR144C                 | MKC7          |
| YNL069C                                          | RPL16B        | YHL031C                 | GOS1          |
| YJR058C                                          | APS2          | YDR358W                 | GGA1          |
| YJL127C                                          | SPT10         | YBR200W                 | BEM1          |
| YJR090C                                          | GRR1          | YMR038C                 | CCS1          |
| YER116C                                          | SLX8          | YCR053W                 | THR4          |
| YDL002C                                          | NHP10         | YPR120C                 | CLB5          |
| YJR063W                                          | RPA12         | YPL152W                 | RRD2          |
| YNL238W                                          | KEX2          | YJL183W                 | MNN11         |
| YML095C                                          | RAD10         | YDR379W                 | RGA2          |
| YIL053W                                          | RHR2          | YDR310C                 | SUM1          |
| YML071C                                          | COG8          | YKR030W                 | GMH1          |
| YPL195W                                          | APL5          | YNL107W                 | YAF9          |
| YDR289C                                          | RTT103        | YER139C                 | YER139C       |
| YDR227W                                          | SIR4          | YBR010W                 | HHT1          |
| YDR261C                                          | EXG2          | YDR207C                 | UME6          |
| YNL031C                                          | HHT2          | YNL030W                 | HHT2          |
| YNL291C                                          | MID1          | YAR014C                 | BUD14         |

| Predictions at threshold level 0.75 continued... |               |                         |               |
|--------------------------------------------------|---------------|-------------------------|---------------|
| Gene1 of predicted pair                          |               | Gene2 of predicted pair |               |
| Systematic Name                                  | Standard Name | Systematic Name         | Standard Name |
| YGL253W                                          | HXK2          | YAR014C                 | BUD14         |
| YMR319C                                          | FET4          | YFL044C                 | OTU1          |
| YPR017C                                          | DSS4          | YGR020C                 | VMA7          |
| YPR120C                                          | CLB5          | YDR183W                 | PLP1          |
| YPL253C                                          | VIK1          | YBR114W                 | RAD16         |
| YNL106C                                          | INP52         | YFR030W                 | MET10         |
| YDR484W                                          | VPS52         | YER144C                 | UBP5          |
| YAL024C                                          | LTE1          | YLR452C                 | SST2          |
| YJR060W                                          | CBF1          | YNR032W                 | PPG1          |
| YLR148W                                          | PEP3          | YLR093C                 | NYV1          |
| YGR019W                                          | UGA1          | YKL048C                 | ELM1          |
| YFR040W                                          | SAP155        | YHL027W                 | RIM101        |
| YBR010W                                          | HHT1          | YNL107W                 | YAF9          |
| YPL253C                                          | VIK1          | YAL010C                 | MDM10         |
| YPL037C                                          | EGD1          | YNL107W                 | YAF9          |
| YMR198W                                          | CIK1          | YLR452C                 | SST2          |
| YOR312C                                          | RPL20B        | YBL101C                 | ECM21         |
| YDR144C                                          | MKC7          | YDR289C                 | RTT103        |
| YGL087C                                          | MMS2          | YJR035W                 | RAD26         |
| YPR084W                                          | YPR084W       | YDR320C                 | SWA2          |
| YKR001C                                          | VPS1          | YDL006W                 | PTC1          |
| YGL100W                                          | SEH1          | YNL273W                 | TOF1          |
| YGR261C                                          | APL6          | YPR119W                 | CLB2          |
| YHR073W                                          | OSH3          | YMR164C                 | MSS11         |
| YLR079W                                          | SIC1          | YNL107W                 | YAF9          |
| YNL218W                                          | MGS1          | YDR207C                 | UME6          |
| YLR337C                                          | VRP1          | YBL047C                 | EDE1          |
| YBL058W                                          | SHP1          | YKR099W                 | BAS1          |
| YNL223W                                          | ATG4          | YLR093C                 | NYV1          |

| Predictions at threshold level 0.75 continued... |               |                         |               |
|--------------------------------------------------|---------------|-------------------------|---------------|
| Gene1 of predicted pair                          |               | Gene2 of predicted pair |               |
| Systematic Name                                  | Standard Name | Systematic Name         | Standard Name |
| YNL106C                                          | INP52         | YPR120C                 | CLB5          |
| YML038C                                          | YMD8          | YER162C                 | RAD4          |
| YOL111C                                          | MDY2          | YMR133W                 | REC114        |
| YDL184C                                          | RPL41A        | YER044C                 | ERG28         |
| YBL047C                                          | EDE1          | YHR108W                 | GGA2          |
| YOR127W                                          | RGA1          | YBR114W                 | RAD16         |
| YDR456W                                          | NHX1          | YDR207C                 | UME6          |
| YMR205C                                          | PFK2          | YPL089C                 | RLM1          |
| YDR192C                                          | NUP42         | YJR090C                 | GRR1          |
| YKR020W                                          | VPS51         | YJR060W                 | CBF1          |
| YKL139W                                          | CTK1          | YJR135C                 | MCM22         |
| YPL195W                                          | APL5          | YBR036C                 | CSG2          |
| YNL307C                                          | MCK1          | YHR039C-A               | VMA10         |
| YBR200W                                          | BEM1          | YNL166C                 | BNI5          |
| YBR107C                                          | IML3          | YJR135C                 | MCM22         |
| YNL243W                                          | SLA2          | YKL079W                 | SMY1          |
| YMR133W                                          | REC114        | YBR280C                 | SAF1          |
| YDR137W                                          | RGP1          | YJR032W                 | CPR7          |
| YNL243W                                          | SLA2          | YCR077C                 | PAT1          |
| YBR108W                                          | YBR108W       | YPL246C                 | RBD2          |
| YKL110C                                          | KTI12         | YDR289C                 | RTT103        |
| YDL116W                                          | NUP84         | YBR228W                 | SLX1          |
| YJR010C-A                                        | SPC1          | YER019C-A               | SBH2          |
| YLR301W                                          | YLR301W       | YBR171W                 | SEC66         |
| YEL065W                                          | SIT1          | YMR153W                 | NUP53         |
| YBR108W                                          | YBR108W       | YDL192W                 | ARF1          |
| YHR084W                                          | STE12         | YER109C                 | FLO8          |
| YHR012W                                          | VPS29         | YOL067C                 | RTG1          |
| YMR216C                                          | SKY1          | YGL115W                 | SNF4          |



| Predictions at threshold level 0.75 continued... |               |                         |               |
|--------------------------------------------------|---------------|-------------------------|---------------|
| Gene1 of predicted pair                          |               | Gene2 of predicted pair |               |
| Systematic Name                                  | Standard Name | Systematic Name         | Standard Name |
| YIL076W                                          | SEC28         | YNL127W                 | FAR11         |
| YBR200W                                          | BEM1          | YLR381W                 | CTF3          |
| YNL166C                                          | BNI5          | YAL002W                 | VPS8          |
| YML095C                                          | RAD10         | YPR046W                 | MCM16         |
| YDR155C                                          | CPR1          | YHR115C                 | DMA1          |
| YBR108W                                          | YBR108W       | YHR012W                 | VPS29         |
| YPL253C                                          | VIK1          | YJL095W                 | BCK1          |
| YBR173C                                          | UMP1          | YKR099W                 | BAS1          |
| YDL020C                                          | RPN4          | YPR036W                 | VMA13         |
| YHR203C                                          | RPS4B         | YBL072C                 | RPS8A         |
| YKL025C                                          | PAN3          | YDR183W                 | PLP1          |
| YMR026C                                          | PEX12         | YPL057C                 | SUR1          |
| YBL088C                                          | TEL1          | YGL090W                 | LIF1          |
| YLR135W                                          | SLX4          | YGL175C                 | SAE2          |
| YDR485C                                          | VPS72         | YBR089C-A               | NHP6B         |
| YDR200C                                          | VPS64         | YDL226C                 | GCS1          |
| YDR335W                                          | MSN5          | YJR060W                 | CBF1          |
| YOR033C                                          | EXO1          | YBR215W                 | HPC2          |
| YKL126W                                          | YPK1          | YJL183W                 | MNN11         |
| YPL024W                                          | RMI1          | YBR030W                 | YBR030W       |
| YFR010W                                          | UBP6          | YML115C                 | VAN1          |
| YBL025W                                          | RRN10         | YMR230W                 | RPS10B        |
| YPR171W                                          | BSP1          | YJL095W                 | BCK1          |
| YDR144C                                          | MKC7          | YGL124C                 | MON1          |
| YMR127C                                          | SAS2          | YPL248C                 | GAL4          |
| YGR104C                                          | SRB5          | YJL140W                 | RPB4          |
| YCR081W                                          | SRB8          | YDR477W                 | SNF1          |
| YLR170C                                          | APS1          | YOR035C                 | SHE4          |
| YMR055C                                          | BUB2          | YGL148W                 | ARO2          |

| Predictions at threshold level 0.75 continued... |               |                         |               |
|--------------------------------------------------|---------------|-------------------------|---------------|
| Gene1 of predicted pair                          |               | Gene2 of predicted pair |               |
| Systematic Name                                  | Standard Name | Systematic Name         | Standard Name |
| YPR084W                                          | YPR084W       | YHL031C                 | GOS1          |
| YNL199C                                          | GCR2          | YGL016W                 | KAP122        |
| YML016C                                          | PPZ1          | YAL002W                 | VPS8          |
| YOR197W                                          | MCA1          | YLL017W                 | YLL017W       |
| YDR202C                                          | RAV2          | YLR447C                 | VMA6          |
| YGR104C                                          | SRB5          | YCR081W                 | SRB8          |
| YLR452C                                          | SST2          | YNL076W                 | MKS1          |
| YJR063W                                          | RPA12         | YCR086W                 | CSM1          |
| YBR107C                                          | IML3          | YGL253W                 | HXK2          |
| YNL166C                                          | BNI5          | YNL078W                 | NIS1          |
| YGR104C                                          | SRB5          | YDL106C                 | PHO2          |
| YFR010W                                          | UBP6          | YNL082W                 | PMS1          |
| YKR099W                                          | BAS1          | YDR358W                 | GGA1          |
| YNL236W                                          | SIN4          | YGL003C                 | CDH1          |
| YHR134W                                          | WSS1          | YPL161C                 | BEM4          |
| YCL037C                                          | SRO9          | YOR327C                 | SNC2          |
| YBR126C                                          | TPS1          | YDR261C                 | EXG2          |
| YLR240W                                          | VPS34         | YOR035C                 | SHE4          |
| YMR199W                                          | CLN1          | YOR275C                 | RIM20         |
| YDR080W                                          | VPS41         | YNL107W                 | YAF9          |
| YNL307C                                          | MCK1          | YBR036C                 | CSG2          |
| YDR323C                                          | PEP7          | YDL226C                 | GCS1          |
| YOR033C                                          | EXO1          | YMR116C                 | ASC1          |
| YDR108W                                          | GSG1          | YLR447C                 | VMA6          |
| YML016C                                          | PPZ1          | YPL152W                 | RRD2          |
| YNL068C                                          | FKH2          | YOR275C                 | RIM20         |
| YJR135C                                          | MCM22         | YMR038C                 | CCS1          |
| YDR335W                                          | MSN5          | YDR076W                 | RAD55         |
| YHR200W                                          | RPN10         | YKL101W                 | HSL1          |

| Predictions at threshold level 0.75 continued... |               |                         |               |
|--------------------------------------------------|---------------|-------------------------|---------------|
| Gene1 of predicted pair                          |               | Gene2 of predicted pair |               |
| Systematic Name                                  | Standard Name | Systematic Name         | Standard Name |
| YFL023W                                          | BUD27         | YOR327C                 | SNC2          |
| YPL022W                                          | RAD1          | YBL079W                 | NUP170        |
| YNL215W                                          | IES2          | YKL160W                 | ELF1          |
| YMR224C                                          | MRE11         | YHR134W                 | WSS1          |
| YLR095C                                          | IOC2          | YBL025W                 | RRN10         |
| YLR079W                                          | SIC1          | YNL054W                 | VAC7          |
| YJL095W                                          | BCK1          | YOL081W                 | IRA2          |
| YDR484W                                          | VPS52         | YCR088W                 | ABP1          |
| YHR060W                                          | VMA22         | YJR084W                 | CSN12         |
| YPL105C                                          | YPL105C       | YGR105W                 | VMA21         |
| YGR249W                                          | MGA1          | YNL307C                 | MCK1          |
| YDR245W                                          | MNN10         | YPR120C                 | CLB5          |
| YLR386W                                          | VAC14         | YOR290C                 | SNF2          |
| YIL159W                                          | BNR1          | YBR280C                 | SAF1          |
| YOR127W                                          | RGA1          | YKR048C                 | NAP1          |
| YML016C                                          | PPZ1          | YPL158C                 | YPL158C       |
| YLR191W                                          | PEX13         | YKL002W                 | DID4          |
| YNL243W                                          | SLA2          | YMR202W                 | ERG2          |
| YML103C                                          | NUP188        | YNL225C                 | CNM67         |
| YDL116W                                          | NUP84         | YPR120C                 | CLB5          |
| YGL223C                                          | COG1          | YNL107W                 | YAF9          |
| YOR358W                                          | HAP5          | YEL053C                 | MAK10         |
| YBR030W                                          | YBR030W       | YML115C                 | VAN1          |
| YKR001C                                          | VPS1          | YMR054W                 | STV1          |
| YOR076C                                          | SKI7          | YNR052C                 | POP2          |
| YKL007W                                          | CAP1          | YNL069C                 | RPL16B        |
| YDR079C-A                                        | TFB5          | YNL301C                 | RPL18B        |
| YLR090W                                          | XDJ1          | YOR066W                 | MSA1          |
| YER161C                                          | SPT2          | YAL002W                 | VPS8          |

| Predictions at threshold level 0.75 continued... |               |                         |               |
|--------------------------------------------------|---------------|-------------------------|---------------|
| Gene1 of predicted pair                          |               | Gene2 of predicted pair |               |
| Systematic Name                                  | Standard Name | Systematic Name         | Standard Name |
| YHR012W                                          | VPS29         | YPL195W                 | APL5          |
| YKL007W                                          | CAP1          | YPL050C                 | MNN9          |
| YKL191W                                          | DPH2          | YIL103W                 | DPH1          |
| YDR146C                                          | SWI5          | YDL155W                 | CLB3          |
| YPR046W                                          | MCM16         | YDL077C                 | VAM6          |
| YJR063W                                          | RPA12         | YAR014C                 | BUD14         |
| YDL013W                                          | SLX5          | YDR318W                 | MCM21         |
| YBR009C                                          | HHF1          | YEL056W                 | HAT2          |
| YKR072C                                          | SIS2          | YPL022W                 | RAD1          |
| YLR064W                                          | YLR064W       | YJL004C                 | SYS1          |
| YPR084W                                          | YPR084W       | YGL174W                 | BUD13         |
| YNL166C                                          | BNI5          | YHL002W                 | HSE1          |
| YLR288C                                          | MEC3          | YBR036C                 | CSG2          |
| YBR042C                                          | CST26         | YAL055W                 | PEX22         |
| YJL053W                                          | PEP8          | YPR032W                 | SRO7          |
| YDL223C                                          | HBT1          | YMR089C                 | YTA12         |
| YKL139W                                          | CTK1          | YNL199C                 | GCR2          |
| YMR032W                                          | HOF1          | YER118C                 | SHO1          |
| YGL178W                                          | MPT5          | YLL021W                 | SPA2          |
| YDR484W                                          | VPS52         | YGL025C                 | PGD1          |
| YDR174W                                          | HMO1          | YML103C                 | NUP188        |
| YDR289C                                          | RTT103        | YAL002W                 | VPS8          |
| YHR178W                                          | STB5          | YNL166C                 | BNI5          |
| YPL057C                                          | SUR1          | YHR081W                 | LRP1          |
| YKR059W                                          | TIF1          | YOL045W                 | PSK2          |
| YDL013W                                          | SLX5          | YBL079W                 | NUP170        |
| YBR171W                                          | SEC66         | YDL223C                 | HBT1          |
| YBR112C                                          | CYC8          | YGR252W                 | GCN5          |
| YML028W                                          | TSA1          | YKL114C                 | APN1          |

| Predictions at threshold level 0.75 continued... |               |                         |               |
|--------------------------------------------------|---------------|-------------------------|---------------|
| Gene1 of predicted pair                          |               | Gene2 of predicted pair |               |
| Systematic Name                                  | Standard Name | Systematic Name         | Standard Name |
| YMR091C                                          | NPL6          | YHL025W                 | SNF6          |
| YDR080W                                          | VPS41         | YNR032W                 | PPG1          |
| YIL159W                                          | BNR1          | YJR084W                 | CSN12         |
| YNL093W                                          | YPT53         | YBR264C                 | YPT10         |
| YHR039C-A                                        | VMA10         | YNL107W                 | YAF9          |
| YBR215W                                          | HPC2          | YJL006C                 | CTK2          |
| YDR108W                                          | GSG1          | YEL043W                 | YEL043W       |
| YCR063W                                          | BUD31         | YGL174W                 | BUD13         |
| YPR120C                                          | CLB5          | YJL157C                 | FAR1          |
| YDR293C                                          | SSD1          | YNL135C                 | FPR1          |
| YBR274W                                          | CHK1          | YEL056W                 | HAT2          |
| YGR072W                                          | UPF3          | YPL079W                 | RPL21B        |
| YGL078C                                          | DBP3          | YBR019C                 | GAL10         |
| YLR079W                                          | SIC1          | YNR052C                 | POP2          |
| YER116C                                          | SLX8          | YDR207C                 | UME6          |
| YPL057C                                          | SUR1          | YKL160W                 | ELF1          |
| YDR004W                                          | RAD57         | YDR192C                 | NUP42         |
| YLR094C                                          | GIS3          | YDR207C                 | UME6          |
| YLR109W                                          | AHP1          | YPR119W                 | CLB2          |
| YGR071C                                          | YGR071C       | YER122C                 | GLO3          |
| YFL023W                                          | BUD27         | YML028W                 | TSA1          |
| YDR245W                                          | MNN10         | YOR014W                 | RTS1          |
| YNL225C                                          | CNM67         | YOR177C                 | MPC54         |
| YER116C                                          | SLX8          | YNL248C                 | RPA49         |
| YHR086W                                          | NAM8          | YMR133W                 | REC114        |
| YEL065W                                          | SIT1          | YPL057C                 | SUR1          |
| YDR443C                                          | SSN2          | YDL184C                 | RPL41A        |
| YHR111W                                          | UBA4          | YFR036W                 | CDC26         |
| YPL161C                                          | BEM4          | YJL117W                 | PHO86         |

| Predictions at threshold level 0.75 continued... |               |                         |               |
|--------------------------------------------------|---------------|-------------------------|---------------|
| Gene1 of predicted pair                          |               | Gene2 of predicted pair |               |
| Systematic Name                                  | Standard Name | Systematic Name         | Standard Name |
| YJL176C                                          | SWI3          | YHL002W                 | HSE1          |
| YDR293C                                          | SSD1          | YBR107C                 | IML3          |
| YMR004W                                          | MVP1          | YHR060W                 | VMA22         |
| YDR183W                                          | PLP1          | YHL002W                 | HSE1          |
| YMR104C                                          | YPK2          | YOL100W                 | PKH2          |
| YGL025C                                          | PGD1          | YKL048C                 | ELM1          |
| YJL029C                                          | VPS53         | YER122C                 | GLO3          |
| YDR146C                                          | SWI5          | YOR008C                 | SLG1          |
| YGR239C                                          | PEX21         | YDL065C                 | PEX19         |
| YHL031C                                          | GOS1          | YPL057C                 | SUR1          |
| YDR484W                                          | VPS52         | YNR072W                 | HXT17         |
| YMR052W                                          | FAR3          | YDL047W                 | SIT4          |
| YGL133W                                          | ITC1          | YGL031C                 | RPL24A        |
| YDL116W                                          | NUP84         | YOR080W                 | DIA2          |
| YHR039C-A                                        | VMA10         | YPL120W                 | VPS30         |
| YOR033C                                          | EXO1          | YDR156W                 | RPA14         |
| YLR240W                                          | VPS34         | YKR020W                 | VPS51         |
| YBL008W                                          | HIR1          | YNL031C                 | HHT2          |
| YDR335W                                          | MSN5          | YLR350W                 | ORM2          |
| YOL018C                                          | TLG2          | YEL042W                 | GDA1          |
| YDL160C                                          | DHH1          | YGR054W                 | YGR054W       |
| YBR030W                                          | YBR030W       | YPR046W                 | MCM16         |
| YGL163C                                          | RAD54         | YPL018W                 | CTF19         |
| YIL076W                                          | SEC28         | YFL023W                 | BUD27         |
| YCR086W                                          | CSM1          | YHR115C                 | DMA1          |
| YNL206C                                          | RTT106        | YBL047C                 | EDE1          |
| YOR038C                                          | HIR2          | YNL107W                 | YAF9          |
| YHR134W                                          | WSS1          | YOL067C                 | RTG1          |
| YNR052C                                          | POP2          | YPL253C                 | VIK1          |

| Predictions at threshold level 0.75 continued... |               |                         |               |
|--------------------------------------------------|---------------|-------------------------|---------------|
| Gene1 of predicted pair                          |               | Gene2 of predicted pair |               |
| Systematic Name                                  | Standard Name | Systematic Name         | Standard Name |
| YDL190C                                          | UFD2          | YPR119W                 | CLB2          |
| YJR135C                                          | MCM22         | YJR035W                 | RAD26         |
| YOR358W                                          | HAP5          | YJL190C                 | RPS22A        |
| YDR155C                                          | CPR1          | YHL002W                 | HSE1          |
| YNL166C                                          | BNI5          | YEL056W                 | HAT2          |
| YPL137C                                          | GIP3          | YFR036W                 | CDC26         |
| YGL066W                                          | SGF73         | YLR410W                 | VIP1          |
| YDR335W                                          | MSN5          | YAL002W                 | VPS8          |
| YBR280C                                          | SAF1          | YEL060C                 | PRB1          |
| YOR069W                                          | VPS5          | YGR020C                 | VMA7          |
| YLR018C                                          | POM34         | YML115C                 | VAN1          |
| YDL077C                                          | VAM6          | YOL081W                 | IRA2          |
| YLR447C                                          | VMA6          | YJR032W                 | CPR7          |
| YDR484W                                          | VPS52         | YMR133W                 | REC114        |
| YPL024W                                          | RMI1          | YBR036C                 | CSG2          |
| YNL307C                                          | MCK1          | YNL076W                 | MKS1          |
| YOR039W                                          | CKB2          | YGL019W                 | CKB1          |
| YPL129W                                          | TAF14         | YDR477W                 | SNF1          |
| YOR290C                                          | SNF2          | YJR063W                 | RPA12         |
| YAL014C                                          | SYN8          | YLR093C                 | NYV1          |
| YPR131C                                          | NAT3          | YML028W                 | TSA1          |
| YLR018C                                          | POM34         | YGR059W                 | SPR3          |
| YOL111C                                          | MDY2          | YDL083C                 | RPS16B        |
| YJL176C                                          | SWI3          | YBL025W                 | RRN10         |
| YJR135C                                          | MCM22         | YHR115C                 | DMA1          |
| YDR443C                                          | SSN2          | YKL048C                 | ELM1          |
| YPR131C                                          | NAT3          | YBR107C                 | IML3          |
| YGL003C                                          | CDH1          | YLR131C                 | ACE2          |
| YOR127W                                          | RGA1          | YDR318W                 | MCM21         |

| Predictions at threshold level 0.75 continued... |               |                         |               |
|--------------------------------------------------|---------------|-------------------------|---------------|
| Gene1 of predicted pair                          |               | Gene2 of predicted pair |               |
| Systematic Name                                  | Standard Name | Systematic Name         | Standard Name |
| YDL223C                                          | HBT1          | YPL195W                 | APL5          |
| YOR032C                                          | HMS1          | YML062C                 | MFT1          |
| YGR019W                                          | UGA1          | YGL124C                 | MON1          |
| YLR292C                                          | SEC72         | YLR234W                 | TOP3          |
| YDL116W                                          | NUP84         | YJR135C                 | MCM22         |
| YOR054C                                          | VHS3          | YKL113C                 | RAD27         |
| YLR079W                                          | SIC1          | YBR194W                 | SOY1          |
| YOR043W                                          | WHI2          | YML001W                 | YPT7          |
| YGR184C                                          | UBR1          | YPL248C                 | GAL4          |
| YBR084C-A                                        | RPL19A        | YHR115C                 | DMA1          |
| YJL117W                                          | PHO86         | YBL101C                 | ECM21         |
| YMR224C                                          | MRE11         | YGL212W                 | VAM7          |
| YCR020C-A                                        | MAK31         | YMR216C                 | SKY1          |
| YLR337C                                          | VRP1          | YBR107C                 | IML3          |
| YOR132W                                          | VPS17         | YLR309C                 | IMH1          |
| YDL047W                                          | SIT4          | YOL091W                 | SPO21         |
| YHR178W                                          | STB5          | YOL081W                 | IRA2          |
| YNL054W                                          | VAC7          | YKL048C                 | ELM1          |
| YOR039W                                          | CKB2          | YIL008W                 | URM1          |
| YDR440W                                          | DOT1          | YOL081W                 | IRA2          |
| YER144C                                          | UBP5          | YGL124C                 | MON1          |
| YOR368W                                          | RAD17         | YLR032W                 | RAD5          |
| YDR293C                                          | SSD1          | YLR309C                 | IMH1          |
| YER139C                                          | YER139C       | YMR038C                 | CCS1          |
| YBR171W                                          | SEC66         | YPL018W                 | CTF19         |
| YDR004W                                          | RAD57         | YDR289C                 | RTT103        |
| YOR351C                                          | MEK1          | YLR263W                 | RED1          |
| YEL065W                                          | SIT1          | YBL103C                 | RTG3          |
| YLR360W                                          | VPS38         | YHR134W                 | WSS1          |



| Predictions at threshold level 0.75 continued... |               |                         |               |
|--------------------------------------------------|---------------|-------------------------|---------------|
| Gene1 of predicted pair                          |               | Gene2 of predicted pair |               |
| Systematic Name                                  | Standard Name | Systematic Name         | Standard Name |
| YML095C                                          | RAD10         | YML028W                 | TSA1          |
| YJL136C                                          | RPS21B        | YHR152W                 | SPO12         |
| YLR090W                                          | XDJ1          | YOL081W                 | IRA2          |
| YDL223C                                          | HBT1          | YER122C                 | GLO3          |
| YDL059C                                          | RAD59         | YKR001C                 | VPS1          |
| YJL183W                                          | MNN11         | YEL056W                 | HAT2          |
| YKR057W                                          | RPS21A        | YHR111W                 | UBA4          |
| YGR135W                                          | PRE9          | YHL002W                 | HSE1          |
| YDR293C                                          | SSD1          | YCR066W                 | RAD18         |
| YKR099W                                          | BAS1          | YDL083C                 | RPS16B        |
| YDR382W                                          | RPP2B         | YDL184C                 | RPL41A        |
| YOR337W                                          | TEA1          | YLR386W                 | VAC14         |
| YIL159W                                          | BNR1          | YNL076W                 | MKS1          |
| YLR452C                                          | SST2          | YMR133W                 | REC114        |
| YNR052C                                          | POP2          | YOL030W                 | GAS5          |
| YDR289C                                          | RTT103        | YGL031C                 | RPL24A        |
| YML016C                                          | PPZ1          | YDR363W-A               | SEM1          |
| YDR265W                                          | PEX10         | YPR119W                 | CLB2          |
| YNR072W                                          | HXT17         | YDL083C                 | RPS16B        |
| YFR010W                                          | UBP6          | YOL051W                 | GAL11         |
| YHR073W                                          | OSH3          | YER115C                 | SPR6          |
| YDR146C                                          | SWI5          | YBR036C                 | CSG2          |
| YAL020C                                          | ATS1          | YDR309C                 | GIC2          |
| YLR360W                                          | VPS38         | YPL105C                 | YPL105C       |
| YHR156C                                          | LIN1          | YKL139W                 | CTK1          |
| YLR381W                                          | CTF3          | YPL106C                 | SSE1          |
| YMR017W                                          | SPO20         | YOR036W                 | PEP12         |
| YIL034C                                          | CAP2          | YJL187C                 | SWE1          |
| YAL024C                                          | LTE1          | YLR399C                 | BDF1          |

| Predictions at threshold level 0.75 continued... |               |                         |               |
|--------------------------------------------------|---------------|-------------------------|---------------|
| Gene1 of predicted pair                          |               | Gene2 of predicted pair |               |
| Systematic Name                                  | Standard Name | Systematic Name         | Standard Name |
| YLR386W                                          | VAC14         | YLR381W                 | CTF3          |
| YMR116C                                          | ASC1          | YLR425W                 | TUS1          |
| YLR386W                                          | VAC14         | YLR399C                 | BDF1          |
| YOL030W                                          | GAS5          | YBL079W                 | NUP170        |
| YIL053W                                          | RHR2          | YBL058W                 | SHP1          |
| YNL215W                                          | IES2          | YOR195W                 | SLK19         |
| YLR094C                                          | GIS3          | YER122C                 | GLO3          |
| YGR056W                                          | RSC1          | YBR089C-A               | NHP6B         |
| YDR335W                                          | MSN5          | YOR308C                 | SNU66         |
| YMR039C                                          | SUB1          | YNL215W                 | IES2          |
| YOR290C                                          | SNF2          | YNR023W                 | SNF12         |
| YJR056C                                          | YJR056C       | YDL077C                 | VAM6          |
| YPR017C                                          | DSS4          | YJL004C                 | SYS1          |
| YHR111W                                          | UBA4          | YPL256C                 | CLN2          |
| YER162C                                          | RAD4          | YER139C                 | YER139C       |
| YMR032W                                          | HOF1          | YHR061C                 | GIC1          |
| YLR058C                                          | SHM2          | YPL018W                 | CTF19         |
| YOR270C                                          | VPH1          | YPL037C                 | EGD1          |
| YAL024C                                          | LTE1          | YLR320W                 | MMS22         |
| YOR327C                                          | SNC2          | YHR115C                 | DMA1          |
| YBR084C-A                                        | RPL19A        | YKL048C                 | ELM1          |
| YOR035C                                          | SHE4          | YBR082C                 | UBC4          |
| YKR020W                                          | VPS51         | YOR312C                 | RPL20B        |
| YPL022W                                          | RAD1          | YBR082C                 | UBC4          |
| YBR057C                                          | MUM2          | YOR195W                 | SLK19         |
| YIL034C                                          | CAP2          | YMR172W                 | HOT1          |
| YPR036W                                          | VMA13         | YML001W                 | YPT7          |
| YKL139W                                          | CTK1          | YJR084W                 | CSN12         |
| YCL001W                                          | RER1          | YML071C                 | COG8          |

| Predictions at threshold level 0.75 continued... |               |                         |               |
|--------------------------------------------------|---------------|-------------------------|---------------|
| Gene1 of predicted pair                          |               | Gene2 of predicted pair |               |
| Systematic Name                                  | Standard Name | Systematic Name         | Standard Name |
| YPR052C                                          | NHP6A         | YOR039W                 | CKB2          |
| YML016C                                          | PPZ1          | YGL250W                 | RMR1          |
| YGL200C                                          | EMP24         | YJL006C                 | CTK2          |
| YHR111W                                          | UBA4          | YNL293W                 | MSB3          |
| YNL291C                                          | MID1          | YDR202C                 | RAV2          |
| YMR039C                                          | SUB1          | YEL056W                 | HAT2          |
| YMR231W                                          | PEP5          | YPL045W                 | VPS16         |
| YBR171W                                          | SEC66         | YER044C                 | ERG28         |
| YPL042C                                          | SSN3          | YKL213C                 | DOA1          |
| YBR173C                                          | UMP1          | YOR290C                 | SNF2          |
| YDL101C                                          | DUN1          | YLR313C                 | SPH1          |
| YOR290C                                          | SNF2          | YKL048C                 | ELM1          |
| YGR019W                                          | UGA1          | YGL237C                 | HAP2          |
| YHR039C-A                                        | VMA10         | YKR030W                 | GMH1          |
| YDR293C                                          | SSD1          | YBL088C                 | TEL1          |
| YHR200W                                          | RPN10         | YBR082C                 | UBC4          |
| YBR217W                                          | ATG12         | YHR081W                 | LRP1          |
| YLR090W                                          | XDJ1          | YGL078C                 | DBP3          |
| YGL078C                                          | DBP3          | YNL307C                 | MCK1          |
| YPR017C                                          | DSS4          | YDR293C                 | SSD1          |
| YBR188C                                          | NTC20         | YIR009W                 | MSL1          |
| YPR018W                                          | RLF2          | YOR195W                 | SLK19         |
| YPL018W                                          | CTF19         | YPR119W                 | CLB2          |
| YKR001C                                          | VPS1          | YJR035W                 | RAD26         |
| YGR072W                                          | UPF3          | YDR320C                 | SWA2          |
| YBL051C                                          | PIN4          | YLR233C                 | EST1          |
| YOR023C                                          | AHC1          | YDR155C                 | CPR1          |
| YCR086W                                          | CSM1          | YGL148W                 | ARO2          |
| YPR029C                                          | APL4          | YAL030W                 | SNC1          |

| Predictions at threshold level 0.75 continued... |               |                         |               |
|--------------------------------------------------|---------------|-------------------------|---------------|
| Gene1 of predicted pair                          |               | Gene2 of predicted pair |               |
| Systematic Name                                  | Standard Name | Systematic Name         | Standard Name |
| YAL024C                                          | LTE1          | YBR173C                 | UMP1          |
| YOR195W                                          | SLK19         | YPL256C                 | CLN2          |
| YGL190C                                          | CDC55         | YLR200W                 | YKE2          |
| YPL256C                                          | CLN2          | YLR131C                 | ACE2          |
| YPL037C                                          | EGD1          | YMR311C                 | GLC8          |
| YDL116W                                          | NUP84         | YDR174W                 | HMO1          |
| YMR198W                                          | CIK1          | YHR012W                 | VPS29         |
| YHR060W                                          | VMA22         | YFR036W                 | CDC26         |
| YLR386W                                          | VAC14         | YER110C                 | KAP123        |
| YIL103W                                          | DPH1          | YFR036W                 | CDC26         |
| YOR337W                                          | TEA1          | YML115C                 | VAN1          |
| YPR084W                                          | YPR084W       | YOR124C                 | UBP2          |
| YFR030W                                          | MET10         | YML112W                 | CTK3          |
| YLL039C                                          | UBI4          | YOR312C                 | RPL20B        |
| YDR439W                                          | LRS4          | YGR188C                 | BUB1          |
| YKL139W                                          | CTK1          | YOR124C                 | UBP2          |
| YBR057C                                          | MUM2          | YMR055C                 | BUB2          |
| YJL154C                                          | VPS35         | YBL051C                 | PIN4          |
| YDR439W                                          | LRS4          | YJL006C                 | CTK2          |
| YDR244W                                          | PEX5          | YGR077C                 | PEX8          |
| YGL178W                                          | MPT5          | YPR119W                 | CLB2          |
| YOR195W                                          | SLK19         | YJL127C                 | SPT10         |
| YCR086W                                          | CSM1          | YLR032W                 | RAD5          |
| YBR131W                                          | CCZ1          | YDL077C                 | VAM6          |
| YDL006W                                          | PTC1          | YNL051W                 | COG5          |
| YNL032W                                          | SIW14         | YGL124C                 | MON1          |
| YNL044W                                          | YIP3          | YCL001W                 | RER1          |
| YPR051W                                          | MAK3          | YGR020C                 | VMA7          |
| YKL139W                                          | CTK1          | YLR315W                 | NKP2          |

| Predictions at threshold level 0.75 continued... |               |                         |               |
|--------------------------------------------------|---------------|-------------------------|---------------|
| Gene1 of predicted pair                          |               | Gene2 of predicted pair |               |
| Systematic Name                                  | Standard Name | Systematic Name         | Standard Name |
| YHR012W                                          | VPS29         | YDR310C                 | SUM1          |
| YNL068C                                          | FKH2          | YJL136C                 | RPS21B        |
| YPL253C                                          | VIK1          | YPR120C                 | CLB5          |
| YMR054W                                          | STV1          | YAR014C                 | BUD14         |
| YMR095C                                          | SNO1          | YLR320W                 | MMS22         |
| YGL025C                                          | PGD1          | YDR261C                 | EXG2          |
| YLR452C                                          | SST2          | YNL041C                 | COG6          |
| YBR036C                                          | CSG2          | YER122C                 | GLO3          |
| YDL083C                                          | RPS16B        | YPL137C                 | GIP3          |
| YGL115W                                          | SNF4          | YDR422C                 | SIP1          |
| YKL116C                                          | PRR1          | YHR039C-A               | VMA10         |
| YDR363W-A                                        | SEM1          | YIL008W                 | URM1          |
| YDR137W                                          | RGP1          | YJR033C                 | RAV1          |
| YDR289C                                          | RTT103        | YJR090C                 | GRR1          |
| YOR080W                                          | DIA2          | YBR082C                 | UBC4          |
| YIL148W                                          | RPL40A        | YOR358W                 | HAP5          |
| YMR095C                                          | SNO1          | YBR019C                 | GAL10         |
| YGR184C                                          | UBR1          | YPR036W                 | VMA13         |
| YLR410W                                          | VIP1          | YGL163C                 | RAD54         |
| YBR215W                                          | HPC2          | YGR252W                 | GCN5          |
| YMR095C                                          | SNO1          | YLR192C                 | HCR1          |
| YHL031C                                          | GOS1          | YAL002W                 | VPS8          |
| YDR385W                                          | EFT2          | YDR137W                 | RGP1          |
| YEL005C                                          | VAB2          | YEL013W                 | VAC8          |
| YLR119W                                          | SRN2          | YHR039C-A               | VMA10         |
| YHR178W                                          | STB5          | YHR114W                 | BZZ1          |
| YLR233C                                          | EST1          | YAL002W                 | VPS8          |
| YHR098C                                          | SFB3          | YOL012C                 | HTZ1          |
| YDR155C                                          | CPR1          | YGL003C                 | CDH1          |

| Predictions at threshold level 0.75 continued... |               |                         |               |
|--------------------------------------------------|---------------|-------------------------|---------------|
| Gene1 of predicted pair                          |               | Gene2 of predicted pair |               |
| Systematic Name                                  | Standard Name | Systematic Name         | Standard Name |
| YDL226C                                          | GCS1          | YDL137W                 | ARF2          |
| YOL111C                                          | MDY2          | YOR066W                 | MSA1          |
| YLR079W                                          | SIC1          | YBL079W                 | NUP170        |
| YDL184C                                          | RPL41A        | YJL095W                 | BCK1          |
| YIL036W                                          | CST6          | YDR363W-A               | SEM1          |
| YBR200W                                          | BEM1          | YMR038C                 | CCS1          |
| YNL307C                                          | MCK1          | YGL003C                 | CDH1          |
| YDL116W                                          | NUP84         | YHR073W                 | OSH3          |
| YPL024W                                          | RMI1          | YLR234W                 | TOP3          |
| YMR198W                                          | CIK1          | YJL095W                 | BCK1          |
| YCL037C                                          | SRO9          | YEL060C                 | PRB1          |
| YGR133W                                          | PEX4          | YKR014C                 | YPT52         |
| YLR148W                                          | PEP3          | YHR161C                 | YAP1801       |
| YDR477W                                          | SNF1          | YLR386W                 | VAC14         |
| YCR077C                                          | PAT1          | YGL148W                 | ARO2          |
| YBL021C                                          | HAP3          | YDR254W                 | CHL4          |
| YOR132W                                          | VPS17         | YHR111W                 | UBA4          |
| YPL037C                                          | EGD1          | YER139C                 | YER139C       |
| YPR028W                                          | YOP1          | YGL198W                 | YIP4          |
| YPR051W                                          | MAK3          | YGR188C                 | BUB1          |
| YCR024C-A                                        | PMP1          | YGL016W                 | KAP122        |
| YOR195W                                          | SLK19         | YDR264C                 | AKR1          |
| YKR072C                                          | SIS2          | YMR055C                 | BUB2          |
| YPR051W                                          | MAK3          | YCL037C                 | SRO9          |
| YHR152W                                          | SPO12         | YHR200W                 | RPN10         |
| YFR030W                                          | MET10         | YGR262C                 | BUD32         |
| YBR200W                                          | BEM1          | YBR215W                 | HPC2          |
| YIL053W                                          | RHR2          | YLR370C                 | ARC18         |
| YJR040W                                          | GEF1          | YNL238W                 | KEX2          |

| Predictions at threshold level 0.75 continued... |               |                         |               |
|--------------------------------------------------|---------------|-------------------------|---------------|
| Gene1 of predicted pair                          |               | Gene2 of predicted pair |               |
| Systematic Name                                  | Standard Name | Systematic Name         | Standard Name |
| YDR261C                                          | EXG2          | YJR084W                 | CSN12         |
| YOL126C                                          | MDH2          | YPL256C                 | CLN2          |
| YMR026C                                          | PEX12         | YDL223C                 | HBT1          |
| YFL023W                                          | BUD27         | YNL076W                 | MKS1          |
| YOR270C                                          | VPH1          | YDL223C                 | HBT1          |
| YHR156C                                          | LIN1          | YJL183W                 | MNN11         |
| YKL032C                                          | IXR1          | YLR425W                 | TUS1          |
| YNL238W                                          | KEX2          | YNL127W                 | FAR11         |
| YDR378C                                          | LSM6          | YLR410W                 | VIP1          |
| YJR032W                                          | CPR7          | YCR053W                 | THR4          |
| YOR106W                                          | VAM3          | YPL234C                 | TFP3          |
| YMR198W                                          | CIK1          | YMR038C                 | CCS1          |
| YHR060W                                          | VMA22         | YDR207C                 | UME6          |
| YDL155W                                          | CLB3          | YHR114W                 | BZZ1          |
| YDR318W                                          | MCM21         | YNL116W                 | DMA2          |
| YDL065C                                          | PEX19         | YOL044W                 | PEX15         |
| YPR040W                                          | TIP41         | YLR425W                 | TUS1          |
| YMR109W                                          | MYO5          | YJR090C                 | GRR1          |
| YOR043W                                          | WHI2          | YLR398C                 | SKI2          |
| YER075C                                          | PTP3          | YER089C                 | PTC2          |
| YLR090W                                          | XDJ1          | YPL057C                 | SUR1          |
| YOR327C                                          | SNC2          | YKR030W                 | GMH1          |
| YMR004W                                          | MVP1          | YNL127W                 | FAR11         |
| YMR116C                                          | ASC1          | YDL223C                 | HBT1          |
| YOR033C                                          | EXO1          | YNL076W                 | MKS1          |
| YLR381W                                          | CTF3          | YGR135W                 | PRE9          |
| YMR152W                                          | YIM1          | YDL077C                 | VAM6          |
| YBR200W                                          | BEM1          | YNL229C                 | URE2          |
| YFR031C-A                                        | RPL2A         | YLR370C                 | ARC18         |

| Predictions at threshold level 0.75 continued... |               |                         |               |
|--------------------------------------------------|---------------|-------------------------|---------------|
| Gene1 of predicted pair                          |               | Gene2 of predicted pair |               |
| Systematic Name                                  | Standard Name | Systematic Name         | Standard Name |
| YLR018C                                          | POM34         | YGL215W                 | CLG1          |
| YMR224C                                          | MRE11         | YNL291C                 | MID1          |
| YHR111W                                          | UBA4          | YHR200W                 | RPN10         |
| YFR024C-A                                        | LSB3          | YPR119W                 | CLB2          |
| YKR093W                                          | PTR2          | YPR149W                 | NCE102        |
| YLR135W                                          | SLX4          | YBR073W                 | RDH54         |
| YEL065W                                          | SIT1          | YNL058C                 | YNL058C       |
| YHR039C-A                                        | VMA10         | YPR032W                 | SRO7          |
| YER118C                                          | SHO1          | YER040W                 | GLN3          |
| YNL199C                                          | GCR2          | YOR014W                 | RTS1          |
| YPR084W                                          | YPR084W       | YNL291C                 | MID1          |
| YJR032W                                          | CPR7          | YNL051W                 | COG5          |
| YDL116W                                          | NUP84         | YKL139W                 | CTK1          |
| YGL163C                                          | RAD54         | YOR014W                 | RTS1          |
| YIL076W                                          | SEC28         | YKR020W                 | VPS51         |
| YLR079W                                          | SIC1          | YLR371W                 | ROM2          |
| YMR016C                                          | SOK2          | YPL037C                 | EGD1          |
| YGL212W                                          | VAM7          | YPL037C                 | EGD1          |
| YGR249W                                          | MGA1          | YHR060W                 | VMA22         |
| YFR031C-A                                        | RPL2A         | YNL307C                 | MCK1          |
| YGL087C                                          | MMS2          | YEL053C                 | MAK10         |
| YNL054W                                          | VAC7          | YJL124C                 | LSM1          |
| YNR052C                                          | POP2          | YML112W                 | CTK3          |
| YMR080C                                          | NAM7          | YNL106C                 | INP52         |
| YJR052W                                          | RAD7          | YBR114W                 | RAD16         |
| YJL176C                                          | SWI3          | YKL032C                 | IXR1          |
| YDR174W                                          | HMO1          | YFR036W                 | CDC26         |
| YJR135C                                          | MCM22         | YDR318W                 | MCM21         |
| YDL020C                                          | RPN4          | YPL234C                 | TFP3          |



| Predictions at threshold level 0.75 continued... |               |                         |               |
|--------------------------------------------------|---------------|-------------------------|---------------|
| Gene1 of predicted pair                          |               | Gene2 of predicted pair |               |
| Systematic Name                                  | Standard Name | Systematic Name         | Standard Name |
| YCR002C                                          | CDC10         | YDR309C                 | GIC2          |
| YPL042C                                          | SSN3          | YOR308C                 | SNU66         |
| YHR156C                                          | LIN1          | YLR452C                 | SST2          |
| YBR194W                                          | SOY1          | YKL114C                 | APN1          |
| YPL057C                                          | SUR1          | YHR167W                 | THP2          |
| YLR360W                                          | VPS38         | YBL051C                 | PIN4          |
| YPL037C                                          | EGD1          | YMR214W                 | SCJ1          |
| YML115C                                          | VAN1          | YLR180W                 | SAM1          |
| YDL080C                                          | THI3          | YNL107W                 | YAF9          |
| YNL087W                                          | TCB2          | YKL126W                 | YPK1          |
| YPL137C                                          | GIP3          | YLR180W                 | SAM1          |
| YER116C                                          | SLX8          | YPL253C                 | VIK1          |
| YPL253C                                          | VIK1          | YDR200C                 | VPS64         |
| YHR039C-A                                        | VMA10         | YNL076W                 | MKS1          |
| YML071C                                          | COG8          | YDR207C                 | UME6          |
| YLR192C                                          | HCR1          | YLR093C                 | NYV1          |
| YDR129C                                          | SAC6          | YDL161W                 | ENT1          |
| YOR018W                                          | ROD1          | YLR248W                 | RCK2          |
| YPR084W                                          | YPR084W       | YLR182W                 | SWI6          |
| YOR106W                                          | VAM3          | YKR030W                 | GMH1          |
| YLR313C                                          | SPH1          | YDL013W                 | SLX5          |
| YER110C                                          | KAP123        | YBR107C                 | IML3          |
| YKR099W                                          | BAS1          | YNL041C                 | COG6          |
| YDR443C                                          | SSN2          | YER044C                 | ERG28         |
| YDL013W                                          | SLX5          | YBR082C                 | UBC4          |
| YMR216C                                          | SKY1          | YEL053C                 | MAK10         |
| YPR018W                                          | RLF2          | YOR101W                 | RAS1          |
| YIL076W                                          | SEC28         | YHR167W                 | THP2          |
| YMR070W                                          | MOT3          | YOR035C                 | SHE4          |

| Predictions at threshold level 0.75 continued... |               |                         |               |
|--------------------------------------------------|---------------|-------------------------|---------------|
| Gene1 of predicted pair                          |               | Gene2 of predicted pair |               |
| Systematic Name                                  | Standard Name | Systematic Name         | Standard Name |
| YGL115W                                          | SNF4          | YLR320W                 | MMS22         |
| YDR080W                                          | VPS41         | YER120W                 | SCS2          |
| YAL024C                                          | LTE1          | YDR363W-A               | SEM1          |
| YFL003C                                          | MSH4          | YPR119W                 | CLB2          |
| YBR228W                                          | SLX1          | YMR116C                 | ASC1          |
| YMR054W                                          | STV1          | YNR032W                 | PPG1          |
| YOR106W                                          | VAM3          | YAR014C                 | BUD14         |
| YLR386W                                          | VAC14         | YGL253W                 | HXK2          |
| YKL139W                                          | CTK1          | YPL253C                 | VIK1          |
| YNL291C                                          | MID1          | YNL051W                 | COG5          |
| YLR360W                                          | VPS38         | YBR200W                 | BEM1          |
| YJL172W                                          | CPS1          | YOR290C                 | SNF2          |
| YLR381W                                          | CTF3          | YML028W                 | TSA1          |
| YOL067C                                          | RTG1          | YNL107W                 | YAF9          |
| YGL175C                                          | SAE2          | YOL090W                 | MSH2          |
| YGL087C                                          | MMS2          | YDL013W                 | SLX5          |
| YIL156W                                          | UBP7          | YKL068W                 | NUP100        |
| YML109W                                          | ZDS2          | YDR309C                 | GIC2          |
| YGR100W                                          | MDR1          | YNL293W                 | MSB3          |
| YMR004W                                          | MVP1          | YNL238W                 | KEX2          |
| YGR104C                                          | SRB5          | YNR052C                 | POP2          |
| YDR363W-A                                        | SEM1          | YJL183W                 | MNN11         |
| YDR254W                                          | CHL4          | YGL151W                 | NUT1          |
| YEL050C                                          | RML2          | YNL107W                 | YAF9          |
| YGR072W                                          | UPF3          | YFR010W                 | UBP6          |
| YGR071C                                          | YGR071C       | YNL041C                 | COG6          |
| YDR484W                                          | VPS52         | YJL172W                 | CPS1          |
| YGL087C                                          | MMS2          | YDR076W                 | RAD55         |
| YPL178W                                          | CBC2          | YFL047W                 | RGD2          |

| Predictions at threshold level 0.75 continued... |               |                         |               |
|--------------------------------------------------|---------------|-------------------------|---------------|
| Gene1 of predicted pair                          |               | Gene2 of predicted pair |               |
| Systematic Name                                  | Standard Name | Systematic Name         | Standard Name |
| YDR261C                                          | EXG2          | YNL076W                 | MKS1          |
| YGR105W                                          | VMA21         | YAL055W                 | PEX22         |
| YHR081W                                          | LRP1          | YMR214W                 | SCJ1          |
| YKL214C                                          | YRA2          | YBR111W-A               | SUS1          |
| YDR496C                                          | PUF6          | YHR052W                 | CIC1          |
| YBL058W                                          | SHP1          | YKL139W                 | CTK1          |
| YMR142C                                          | RPL13B        | YJR084W                 | CSN12         |
| YLR381W                                          | CTF3          | YOR023C                 | AHC1          |
| YFR031C-A                                        | RPL2A         | YPL105C                 | YPL105C       |
| YGL066W                                          | SGF73         | YBL047C                 | EDE1          |
| YMR231W                                          | PEP5          | YDL226C                 | GCS1          |
| YDR156W                                          | RPA14         | YDR335W                 | MSN5          |
| YPL057C                                          | SUR1          | YGR188C                 | BUB1          |
| YJR032W                                          | CPR7          | YOL081W                 | IRA2          |
| YJL154C                                          | VPS35         | YJR040W                 | GEF1          |
| YPL161C                                          | BEM4          | YER162C                 | RAD4          |
| YIL076W                                          | SEC28         | YNL032W                 | SIW14         |
| YOR290C                                          | SNF2          | YGL003C                 | CDH1          |
| YLR288C                                          | MEC3          | YBR274W                 | CHK1          |
| YFL023W                                          | BUD27         | YHR081W                 | LRP1          |
| YER116C                                          | SLX8          | YLR381W                 | CTF3          |
| YML016C                                          | PPZ1          | YNL147W                 | LSM7          |
| YKR020W                                          | VPS51         | YNL051W                 | COG5          |
| YLR292C                                          | SEC72         | YGL151W                 | NUT1          |
| YLR119W                                          | SRN2          | YPL137C                 | GIP3          |
| YML071C                                          | COG8          | YPR032W                 | SRO7          |
| YBL025W                                          | RRN10         | YLR398C                 | SKI2          |
| YML121W                                          | GTR1          | YKR007W                 | MEH1          |
| YNL243W                                          | SLA2          | YHR108W                 | GGA2          |

| Predictions at threshold level 0.75 continued... |               |                         |               |
|--------------------------------------------------|---------------|-------------------------|---------------|
| Gene1 of predicted pair                          |               | Gene2 of predicted pair |               |
| Systematic Name                                  | Standard Name | Systematic Name         | Standard Name |
| YPL253C                                          | VIK1          | YJR063W                 | RPA12         |
| YNL215W                                          | IES2          | YPL018W                 | CTF19         |
| YGR105W                                          | VMA21         | YJR033C                 | RAV1          |
| YGL066W                                          | SGF73         | YOR275C                 | RIM20         |
| YKR061W                                          | KTR2          | YMR055C                 | BUB2          |
| YLR119W                                          | SRN2          | YNR072W                 | HXT17         |
| YJR056C                                          | YJR056C       | YDR137W                 | RGP1          |
| YDR443C                                          | SSN2          | YMR230W                 | RPS10B        |
| YHR060W                                          | VMA22         | YEL053C                 | MAK10         |
| YJR140C                                          | HIR3          | YOR308C                 | SNU66         |
| YDR484W                                          | VPS52         | YOR043W                 | WHI2          |
| YLR102C                                          | APC9          | YNL116W                 | DMA2          |
| YPL115C                                          | BEM3          | YLR447C                 | VMA6          |
| YDR378C                                          | LSM6          | YDR183W                 | PLP1          |
| YMR016C                                          | SOK2          | YBR280C                 | SAF1          |
| YER044C                                          | ERG28         | YJR032W                 | CPR7          |
| YNL288W                                          | CAF40         | YGR108W                 | CLB1          |
| YBR030W                                          | YBR030W       | YJL172W                 | CPS1          |
| YDR245W                                          | MNN10         | YDR207C                 | UME6          |
| YLR093C                                          | NYV1          | YMR214W                 | SCJ1          |
| YKL116C                                          | PRR1          | YOR290C                 | SNF2          |
| YML038C                                          | YMD8          | YNR032W                 | PPG1          |
| YKL213C                                          | DOA1          | YER122C                 | GLO3          |
| YLR337C                                          | VRP1          | YGR108W                 | CLB1          |
| YGL237C                                          | HAP2          | YDR183W                 | PLP1          |
| YDR334W                                          | SWR1          | YGL190C                 | CDC55         |
| YJR140C                                          | HIR3          | YGR252W                 | GCN5          |
| YDR293C                                          | SSD1          | YDR310C                 | SUM1          |
| YJL154C                                          | VPS35         | YNL291C                 | MID1          |

| Predictions at threshold level 0.75 continued... |               |                         |               |
|--------------------------------------------------|---------------|-------------------------|---------------|
| Gene1 of predicted pair                          |               | Gene2 of predicted pair |               |
| Systematic Name                                  | Standard Name | Systematic Name         | Standard Name |
| YJL124C                                          | LSM1          | YHR115C                 | DMA1          |
| YJL137C                                          | GLG2          | YIL045W                 | PIG2          |
| YNL236W                                          | SIN4          | YLR370C                 | ARC18         |
| YMR109W                                          | MYO5          | YBL016W                 | FUS3          |
| YDR004W                                          | RAD57         | YMR224C                 | MRE11         |
| YDR080W                                          | VPS41         | YOR036W                 | PEP12         |
| YIL008W                                          | URM1          | YAL002W                 | VPS8          |
| YLR216C                                          | CPR6          | YJR135C                 | MCM22         |
| YGL115W                                          | SNF4          | YNL051W                 | COG5          |
| YBR127C                                          | VMA2          | YKR020W                 | VPS51         |
| YER087C-B                                        | SBH1          | YPL047W                 | SGF11         |
| YPL024W                                          | RMI1          | YBR215W                 | HPC2          |
| YDR378C                                          | LSM6          | YJR060W                 | CBF1          |
| YDR363W-A                                        | SEM1          | YOR312C                 | RPL20B        |
| YGL174W                                          | BUD13         | YDR378C                 | LSM6          |
| YDL184C                                          | RPL41A        | YBR171W                 | SEC66         |
| YPL057C                                          | SUR1          | YOR043W                 | WHI2          |
| YGR071C                                          | YGR071C       | YHR077C                 | NMD2          |
| YOR043W                                          | WHI2          | YJL183W                 | MNN11         |
| YNL032W                                          | SIW14         | YMR214W                 | SCJ1          |
| YBR108W                                          | YBR108W       | YPL037C                 | EGD1          |
| YLR119W                                          | SRN2          | YOR066W                 | MSA1          |
| YFR031C-A                                        | RPL2A         | YKR020W                 | VPS51         |
| YJR070C                                          | LIA1          | YEL022W                 | GEA2          |
| YBR274W                                          | CHK1          | YPR120C                 | CLB5          |
| YDR183W                                          | PLP1          | YML112W                 | CTK3          |
| YPR029C                                          | APL4          | YOR327C                 | SNC2          |
| YER001W                                          | MNN1          | YNL079C                 | TPM1          |
| YGL087C                                          | MMS2          | YLR150W                 | STM1          |

| Predictions at threshold level 0.75 continued... |               |                         |               |
|--------------------------------------------------|---------------|-------------------------|---------------|
| Gene1 of predicted pair                          |               | Gene2 of predicted pair |               |
| Systematic Name                                  | Standard Name | Systematic Name         | Standard Name |
| YPR131C                                          | NAT3          | YJR135C                 | MCM22         |
| YGL078C                                          | DBP3          | YLR371W                 | ROM2          |
| YNL069C                                          | RPL16B        | YIL076W                 | SEC28         |
| YMR026C                                          | PEX12         | YBR217W                 | ATG12         |
| YOR132W                                          | VPS17         | YHR060W                 | VMA22         |
| YBL058W                                          | SHP1          | YGL124C                 | MON1          |
| YER001W                                          | MNN1          | YFR036W                 | CDC26         |
| YPL018W                                          | CTF19         | YNL225C                 | CNM67         |
| YJL176C                                          | SWI3          | YDR129C                 | SAC6          |
| YER116C                                          | SLX8          | YMR133W                 | REC114        |
| YHL031C                                          | GOS1          | YGL095C                 | VPS45         |
| YOR290C                                          | SNF2          | YLR398C                 | SKI2          |
| YGL033W                                          | HOP2          | YLR180W                 | SAM1          |
| YJL127C                                          | SPT10         | YPL018W                 | CTF19         |
| YBR217W                                          | ATG12         | YDL077C                 | VAM6          |
| YMR039C                                          | SUB1          | YDR254W                 | CHL4          |
| YBR171W                                          | SEC66         | YDL006W                 | PTC1          |
| YGR104C                                          | SRB5          | YJR140C                 | HIR3          |
| YGR217W                                          | CCH1          | YBR041W                 | FAT1          |
| YBR030W                                          | YBR030W       | YNR072W                 | HXT17         |
| YGL078C                                          | DBP3          | YOR290C                 | SNF2          |
| YPR032W                                          | SRO7          | YAL002W                 | VPS8          |
| YLR386W                                          | VAC14         | YER122C                 | GLO3          |
| YMR039C                                          | SUB1          | YGL163C                 | RAD54         |
| YDR293C                                          | SSD1          | YML001W                 | YPT7          |
| YKL119C                                          | VPH2          | YKL041W                 | VPS24         |
| YCL037C                                          | SRO9          | YER162C                 | RAD4          |
| YIL036W                                          | CST6          | YDR289C                 | RTT103        |
| YDR137W                                          | RGP1          | YHR167W                 | THP2          |

| Predictions at threshold level 0.75 continued... |               |                         |               |
|--------------------------------------------------|---------------|-------------------------|---------------|
| Gene1 of predicted pair                          |               | Gene2 of predicted pair |               |
| Systematic Name                                  | Standard Name | Systematic Name         | Standard Name |
| YDR225W                                          | HTA1          | YPL129W                 | TAF14         |
| YNL201C                                          | PSY2          | YAR014C                 | BUD14         |
| YDR477W                                          | SNF1          | YPR030W                 | CSR2          |
| YLR079W                                          | SIC1          | YDR245W                 | MNN10         |
| YIL034C                                          | CAP2          | YDR183W                 | PLP1          |
| YDR358W                                          | GGA1          | YBL025W                 | RRN10         |
| YGL200C                                          | EMP24         | YOR141C                 | ARP8          |
| YGR135W                                          | PRE9          | YHR115C                 | DMA1          |
| YDL006W                                          | PTC1          | YDR310C                 | SUM1          |
| YER116C                                          | SLX8          | YBR215W                 | HPC2          |
| YIL034C                                          | CAP2          | YMR055C                 | BUB2          |
| YBR215W                                          | HPC2          | YNL236W                 | SIN4          |
| YPL024W                                          | RMI1          | YOR014W                 | RTS1          |
| YJR040W                                          | GEF1          | YPL234C                 | TFP3          |
| YMR109W                                          | MYO5          | YER118C                 | SHO1          |
| YPR051W                                          | MAK3          | YKR030W                 | GMH1          |
| YCL037C                                          | SRO9          | YOR038C                 | HIR2          |
| YER040W                                          | GLN3          | YOL081W                 | IRA2          |
| YER139C                                          | YER139C       | YOL081W                 | IRA2          |
| YDL116W                                          | NUP84         | YER116C                 | SLX8          |
| YJL172W                                          | CPS1          | YDL077C                 | VAM6          |
| YGL078C                                          | DBP3          | YHR060W                 | VMA22         |
| YOL111C                                          | MDY2          | YGL124C                 | MON1          |
| YAL024C                                          | LTE1          | YGL003C                 | CDH1          |
| YAL024C                                          | LTE1          | YDR358W                 | GGA1          |
| YCR039C                                          | MATALPHA2     | YPL240C                 | HSP82         |
| YGR108W                                          | CLB1          | YOR141C                 | ARP8          |
| YGR249W                                          | MGA1          | YBR217W                 | ATG12         |
| YDR318W                                          | MCM21         | YHR115C                 | DMA1          |

| Predictions at threshold level 0.75 continued... |               |                         |               |
|--------------------------------------------------|---------------|-------------------------|---------------|
| Gene1 of predicted pair                          |               | Gene2 of predicted pair |               |
| Systematic Name                                  | Standard Name | Systematic Name         | Standard Name |
| YHR079C                                          | IRE1          | YOL031C                 | SIL1          |
| YJR140C                                          | HIR3          | YML115C                 | VAN1          |
| YHR012W                                          | VPS29         | YGL252C                 | RTG2          |
| YIL008W                                          | URM1          | YNL079C                 | TPM1          |
| YPL024W                                          | RMI1          | YKR099W                 | BAS1          |
| YBR258C                                          | SHG1          | YDR155C                 | CPR1          |
| YPR030W                                          | CSR2          | YDL192W                 | ARF1          |
| YCR081W                                          | SRB8          | YCR084C                 | TUP1          |
| YNL248C                                          | RPA49         | YJL140W                 | RPB4          |
| YDL116W                                          | NUP84         | YPR131C                 | NAT3          |
| YMR080C                                          | NAM7          | YJR140C                 | HIR3          |
| YBL103C                                          | RTG3          | YJL183W                 | MNN11         |
| YOL091W                                          | SPO21         | YNL107W                 | YAF9          |
| YLR234W                                          | TOP3          | YGL148W                 | ARO2          |
| YLR119W                                          | SRN2          | YPL057C                 | SUR1          |
| YDR378C                                          | LSM6          | YPL213W                 | LEA1          |
| YGL033W                                          | HOP2          | YPL037C                 | EGD1          |
| YNL325C                                          | FIG4          | YOR066W                 | MSA1          |
| YER044C                                          | ERG28         | YKR035W-A               | DID2          |
| YDR320C                                          | SWA2          | YPR119W                 | CLB2          |
| YPR017C                                          | DSS4          | YPL120W                 | VPS30         |
| YGR133W                                          | PEX4          | YJR084W                 | CSN12         |
| YIL159W                                          | BNR1          | YGL124C                 | MON1          |
| YNL206C                                          | RTT106        | YMR179W                 | SPT21         |
| YJL124C                                          | LSM1          | YBR036C                 | CSG2          |
| YLR102C                                          | APC9          | YNL229C                 | URE2          |
| YJR140C                                          | HIR3          | YGL174W                 | BUD13         |
| YOR195W                                          | SLK19         | YOR101W                 | RAS1          |
| YLL007C                                          | YLL007C       | YJL190C                 | RPS22A        |



| Predictions at threshold level 0.75 continued... |               |                         |               |
|--------------------------------------------------|---------------|-------------------------|---------------|
| Gene1 of predicted pair                          |               | Gene2 of predicted pair |               |
| Systematic Name                                  | Standard Name | Systematic Name         | Standard Name |
| YGR217W                                          | CCH1          | YMR038C                 | CCS1          |
| YOR270C                                          | VPH1          | YPL161C                 | BEM4          |
| YER028C                                          | MIG3          | YPR119W                 | CLB2          |
| YLR360W                                          | VPS38         | YBR171W                 | SEC66         |
| YBL102W                                          | SFT2          | YHR012W                 | VPS29         |
| YLR216C                                          | CPR6          | YCR077C                 | PAT1          |
| YFR031C-A                                        | RPL2A         | YMR214W                 | SCJ1          |
| YLR386W                                          | VAC14         | YPL152W                 | RRD2          |
| YHR200W                                          | RPN10         | YGL124C                 | MON1          |
| YKL139W                                          | CTK1          | YLR093C                 | NYV1          |
| YGR019W                                          | UGA1          | YGR188C                 | BUB1          |
| YMR139W                                          | RIM11         | YDR207C                 | UME6          |
| YDR395W                                          | SXM1          | YER110C                 | KAP123        |
| YMR004W                                          | MVP1          | YLR309C                 | IMH1          |
| YPL001W                                          | HAT1          | YBR195C                 | MSI1          |
| YBL058W                                          | SHP1          | YML115C                 | VAN1          |
| YPL161C                                          | BEM4          | YDR318W                 | MCM21         |
| YML103C                                          | NUP188        | YAR014C                 | BUD14         |
| YML115C                                          | VAN1          | YER044C                 | ERG28         |
| YIL156W                                          | UBP7          | YML103C                 | NUP188        |
| YNL289W                                          | PCL1          | YOR327C                 | SNC2          |
| YMR224C                                          | MRE11         | YNR072W                 | HXT17         |
| YLR360W                                          | VPS38         | YKR030W                 | GMH1          |
| YOR033C                                          | EXO1          | YHR134W                 | WSS1          |
| YDR358W                                          | GGA1          | YJR125C                 | ENT3          |
| YOR276W                                          | CAF20         | YOL045W                 | PSK2          |
| YBR030W                                          | YBR030W       | YER040W                 | GLN3          |
| YPR131C                                          | NAT3          | YKL114C                 | APN1          |
| YLR360W                                          | VPS38         | YGL253W                 | HXK2          |

| Predictions at threshold level 0.75 continued... |               |                         |               |
|--------------------------------------------------|---------------|-------------------------|---------------|
| Gene1 of predicted pair                          |               | Gene2 of predicted pair |               |
| Systematic Name                                  | Standard Name | Systematic Name         | Standard Name |
| YHR152W                                          | SPO12         | YPL161C                 | BEM4          |
| YNL307C                                          | MCK1          | YBR019C                 | GAL10         |
| YPL253C                                          | VIK1          | YFR030W                 | MET10         |
| YPR017C                                          | DSS4          | YDR202C                 | RAV2          |
| YMR273C                                          | ZDS1          | YPL203W                 | TPK2          |
| YDR156W                                          | RPA14         | YML103C                 | NUP188        |
| YKL126W                                          | YPK1          | YBL047C                 | EDE1          |
| YKR072C                                          | SIS2          | YOR038C                 | HIR2          |
| YPL046C                                          | ELC1          | YGL115W                 | SNF4          |
| YHR167W                                          | THP2          | YNL107W                 | YAF9          |
| YKL213C                                          | DOA1          | YHL002W                 | HSE1          |
| YJL176C                                          | SWI3          | YKR014C                 | YPT52         |
| YPR102C                                          | RPL11A        | YGR100W                 | MDR1          |
| YFL023W                                          | BUD27         | YPR030W                 | CSR2          |
| YOL145C                                          | CTR9          | YDR155C                 | CPR1          |
| YKL139W                                          | CTK1          | YOR080W                 | DIA2          |
| YGL054C                                          | ERV14         | YEL051W                 | VMA8          |
| YFR031C-A                                        | RPL2A         | YDR320C                 | SWA2          |
| YMR273C                                          | ZDS1          | YGL016W                 | KAP122        |
| YHR160C                                          | PEX18         | YNL214W                 | PEX17         |
| YGR089W                                          | NNF2          | YCR086W                 | CSM1          |
| YNL201C                                          | PSY2          | YLR386W                 | VAC14         |
| YHR156C                                          | LIN1          | YJR084W                 | CSN12         |
| YFL023W                                          | BUD27         | YBR280C                 | SAF1          |
| YDR383C                                          | NKP1          | YJR060W                 | CBF1          |
| YNL076W                                          | MKS1          | YEL060C                 | PRB1          |
| YIR005W                                          | IST3          | YNL107W                 | YAF9          |
| YDL223C                                          | HBT1          | YHR081W                 | LRP1          |
| YMR198W                                          | CIK1          | YPL001W                 | HAT1          |

| Predictions at threshold level 0.75 continued... |               |                         |               |
|--------------------------------------------------|---------------|-------------------------|---------------|
| Gene1 of predicted pair                          |               | Gene2 of predicted pair |               |
| Systematic Name                                  | Standard Name | Systematic Name         | Standard Name |
| YBL008W                                          | HIR1          | YCR077C                 | PAT1          |
| YER179W                                          | DMC1          | YNL106C                 | INP52         |
| YKL116C                                          | PRR1          | YJR084W                 | CSN12         |
| YOR132W                                          | VPS17         | YJR090C                 | GRR1          |
| YDL160C                                          | DHH1          | YGR134W                 | CAF130        |
| YLR360W                                          | VPS38         | YDR080W                 | VPS41         |
| YMR039C                                          | SUB1          | YNL236W                 | SIN4          |
| YNL236W                                          | SIN4          | YDR318W                 | MCM21         |
| YEL065W                                          | SIT1          | YLR452C                 | SST2          |
| YDR181C                                          | SAS4          | YMR127C                 | SAS2          |
| YML103C                                          | NUP188        | YGR270W                 | YTA7          |
| YBR217W                                          | ATG12         | YPL195W                 | APL5          |
| YLR119W                                          | SRN2          | YDL077C                 | VAM6          |
| YHR156C                                          | LIN1          | YNL041C                 | COG6          |
| YBL058W                                          | SHP1          | YCR053W                 | THR4          |
| YBR107C                                          | IML3          | YJR005W                 | APL1          |
| YLR337C                                          | VRP1          | YHR013C                 | ARD1          |
| YMR142C                                          | RPL13B        | YKR035W-A               | DID2          |
| YDR108W                                          | GSG1          | YDL192W                 | ARF1          |
| YJL176C                                          | SWI3          | YLR360W                 | VPS38         |
| YHR178W                                          | STB5          | YBR200W                 | BEM1          |
| YPL161C                                          | BEM4          | YGL163C                 | RAD54         |
| YBR057C                                          | MUM2          | YLR381W                 | CTF3          |
| YDL047W                                          | SIT4          | YKL114C                 | APN1          |
| YGL115W                                          | SNF4          | YDL192W                 | ARF1          |
| YPL024W                                          | RMI1          | YKL139W                 | CTK1          |
| YBR171W                                          | SEC66         | YJL183W                 | MNN11         |
| YPL240C                                          | HSP82         | YBR089C-A               | NHP6B         |
| YPR120C                                          | CLB5          | YOR368W                 | RAD17         |

| Predictions at threshold level 0.75 continued... |               |                         |               |
|--------------------------------------------------|---------------|-------------------------|---------------|
| Gene1 of predicted pair                          |               | Gene2 of predicted pair |               |
| Systematic Name                                  | Standard Name | Systematic Name         | Standard Name |
| YLR192C                                          | HCR1          | YOL081W                 | IRA2          |
| YDR383C                                          | NKP1          | YPL253C                 | VIK1          |
| YKL010C                                          | UFD4          | YML115C                 | VAN1          |
| YDR129C                                          | SAC6          | YLR371W                 | ROM2          |
| YMR004W                                          | MVP1          | YJL004C                 | SYS1          |
| YDR477W                                          | SNF1          | YGL003C                 | CDH1          |
| YDL020C                                          | RPN4          | YJR032W                 | CPR7          |
| YPR018W                                          | RLF2          | YLR102C                 | APC9          |
| YGL163C                                          | RAD54         | YOR368W                 | RAD17         |
| YPR084W                                          | YPR084W       | YDR207C                 | UME6          |
| YBL008W                                          | HIR1          | YDL042C                 | SIR2          |
| YLR192C                                          | HCR1          | YMR198W                 | CIK1          |
| YLR234W                                          | TOP3          | YFR036W                 | CDC26         |
| YLR083C                                          | EMP70         | YHL020C                 | OPI1          |
| YJR090C                                          | GRR1          | YAL002W                 | VPS8          |
| YCL067C                                          | HMLALPHA2     | YCR039C                 | MATALPHA2     |
| YDR379W                                          | RGA2          | YJL095W                 | BCK1          |
| YDL013W                                          | SLX5          | YDR207C                 | UME6          |
| YPL024W                                          | RMI1          | YJL183W                 | MNN11         |
| YBL058W                                          | SHP1          | YPR030W                 | CSR2          |
| YLR102C                                          | APC9          | YIL008W                 | URM1          |
| YPR084W                                          | YPR084W       | YOR112W                 | CEX1          |
| YKL068W                                          | NUP100        | YDR076W                 | RAD55         |
| YMR199W                                          | CLN1          | YER027C                 | GAL83         |
| YJL006C                                          | CTK2          | YKL041W                 | VPS24         |
| YMR179W                                          | SPT21         | YPL253C                 | VIK1          |
| YNL201C                                          | PSY2          | YLR254C                 | NDL1          |
| YOR080W                                          | DIA2          | YDL002C                 | NHP10         |
| YJL154C                                          | VPS35         | YCR088W                 | ABP1          |

| Predictions at threshold level 0.75 continued... |               |                         |               |
|--------------------------------------------------|---------------|-------------------------|---------------|
| Gene1 of predicted pair                          |               | Gene2 of predicted pair |               |
| Systematic Name                                  | Standard Name | Systematic Name         | Standard Name |
| YIL076W                                          | SEC28         | YMR214W                 | SCJ1          |
| YNL079C                                          | TPM1          | YGL019W                 | CKB1          |
| YDL116W                                          | NUP84         | YPL042C                 | SSN3          |
| YJL183W                                          | MNN11         | YMR230W                 | RPS10B        |
| YLR381W                                          | CTF3          | YDR155C                 | CPR1          |
| YBR173C                                          | UMP1          | YPL022W                 | RAD1          |
| YER116C                                          | SLX8          | YNL087W                 | TCB2          |
| YMR004W                                          | MVP1          | YOL018C                 | TLG2          |
| YOR109W                                          | INP53         | YJR033C                 | RAV1          |
| YMR124W                                          | YMR124W       | YEL043W                 | YEL043W       |
| YKL139W                                          | CTK1          | YLR180W                 | SAM1          |
| YOR106W                                          | VAM3          | YNR007C                 | ATG3          |
| YMR202W                                          | ERG2          | YGL115W                 | SNF4          |
| YGL078C                                          | DBP3          | YDL184C                 | RPL41A        |
| YPL046C                                          | ELC1          | YER162C                 | RAD4          |
| YDR254W                                          | CHL4          | YPR119W                 | CLB2          |
| YBL017C                                          | PEP1          | YJR125C                 | ENT3          |
| YDL184C                                          | RPL41A        | YKR099W                 | BAS1          |
| YDR443C                                          | SSN2          | YER162C                 | RAD4          |
| YJR032W                                          | CPR7          | YLR398C                 | SKI2          |
| YMR142C                                          | RPL13B        | YGL115W                 | SNF4          |
| YJL004C                                          | SYS1          | YNL127W                 | FAR11         |
| YLR234W                                          | TOP3          | YBR036C                 | CSG2          |
| YER179W                                          | DMC1          | YBR073W                 | RDH54         |
| YPL024W                                          | RMI1          | YER139C                 | YER139C       |
| YGL025C                                          | PGD1          | YPL161C                 | BEM4          |
| YBR289W                                          | SNF5          | YKL109W                 | HAP4          |
| YKL139W                                          | CTK1          | YHR200W                 | RPN10         |
| YMR153W                                          | NUP53         | YGL003C                 | CDH1          |

| Predictions at threshold level 0.75 continued... |               |                         |               |
|--------------------------------------------------|---------------|-------------------------|---------------|
| Gene1 of predicted pair                          |               | Gene2 of predicted pair |               |
| Systematic Name                                  | Standard Name | Systematic Name         | Standard Name |
| YKL126W                                          | YPK1          | YER122C                 | GLO3          |
| YEL053C                                          | MAK10         | YDR261C                 | EXG2          |
| YOR127W                                          | RGA1          | YGR054W                 | YGR054W       |
| YBR009C                                          | HHF1          | YPL248C                 | GAL4          |
| YBR127C                                          | VMA2          | YJL183W                 | MNN11         |
| YHR160C                                          | PEX18         | YJL210W                 | PEX2          |
| YLR095C                                          | IOC2          | YKR035W-A               | DID2          |
| YEL053C                                          | MAK10         | YJR032W                 | CPR7          |
| YPL046C                                          | ELC1          | YOR028C                 | CIN5          |
| YEL027W                                          | CUP5          | YKR001C                 | VPS1          |
| YPL037C                                          | EGD1          | YKR035W-A               | DID2          |
| YOR127W                                          | RGA1          | YCL037C                 | SRO9          |
| YJL058C                                          | BIT61         | YPL180W                 | TCO89         |
| YOR106W                                          | VAM3          | YGL198W                 | YIP4          |
| YLR315W                                          | NKP2          | YDR440W                 | DOT1          |
| YNL051W                                          | COG5          | YNL107W                 | YAF9          |
| YKL139W                                          | CTK1          | YOR001W                 | RRP6          |
| YGR184C                                          | UBR1          | YCL014W                 | BUD3          |
| YIL159W                                          | BNR1          | YNL058C                 | YNL058C       |
| YJL036W                                          | SNX4          | YOR109W                 | INP53         |
| YOR195W                                          | SLK19         | YPR120C                 | CLB5          |
| YDL180W                                          | YDL180W       | YMR004W                 | MVP1          |
| YNL289W                                          | PCL1          | YNL116W                 | DMA2          |
| YER144C                                          | UBP5          | YDR207C                 | UME6          |
| YDL155W                                          | CLB3          | YOL067C                 | RTG1          |
| YGR252W                                          | GCN5          | YHR200W                 | RPN10         |
| YOR083W                                          | WHI5          | YJR005W                 | APL1          |
| YMR179W                                          | SPT21         | YDR200C                 | VPS64         |
| YBR009C                                          | HHF1          | YOR141C                 | ARP8          |

| Predictions at threshold level 0.75 continued... |               |                         |               |
|--------------------------------------------------|---------------|-------------------------|---------------|
| Gene1 of predicted pair                          |               | Gene2 of predicted pair |               |
| Systematic Name                                  | Standard Name | Systematic Name         | Standard Name |
| YOR001W                                          | RRP6          | YER139C                 | YER139C       |
| YDR320C                                          | SWA2          | YJR031C                 | GEA1          |
| YDR176W                                          | NGG1          | YJL140W                 | RPB4          |
| YLR337C                                          | VRP1          | YOR308C                 | SNU66         |
| YOR035C                                          | SHE4          | YDR207C                 | UME6          |
| YJL176C                                          | SWI3          | YER161C                 | SPT2          |
| YBL008W                                          | HIR1          | YDL002C                 | NHP10         |
| YOR069W                                          | VPS5          | YNL107W                 | YAF9          |
| YML016C                                          | PPZ1          | YBR107C                 | IML3          |
| YPL253C                                          | VIK1          | YPL152W                 | RRD2          |
| YLR386W                                          | VAC14         | YER162C                 | RAD4          |
| YFL023W                                          | BUD27         | YOR035C                 | SHE4          |
| YMR116C                                          | ASC1          | YMR205C                 | PFK2          |
| YBR030W                                          | YBR030W       | YKR035W-A               | DID2          |
| YOR083W                                          | WHI5          | YPR120C                 | CLB5          |
| YLR360W                                          | VPS38         | YGL200C                 | EMP24         |
| YDL184C                                          | RPL41A        | YER040W                 | GLN3          |
| YKR020W                                          | VPS51         | YNL107W                 | YAF9          |
| YDL006W                                          | PTC1          | YGR105W                 | VMA21         |
| YLR093C                                          | NYV1          | YOL081W                 | IRA2          |
| YOR140W                                          | SFL1          | YCR084C                 | TUP1          |
| YDL020C                                          | RPN4          | YMR224C                 | MRE11         |
| YNL147W                                          | LSM7          | YOL081W                 | IRA2          |
| YDR176W                                          | NGG1          | YLR182W                 | SWI6          |
| YGL200C                                          | EMP24         | YOR035C                 | SHE4          |
| YHR178W                                          | STB5          | YBR274W                 | CHK1          |
| YPL246C                                          | RBD2          | YKL068W                 | NUP100        |
| YOR001W                                          | RRP6          | YKL213C                 | DOA1          |
| YGR104C                                          | SRB5          | YBR089C-A               | NHP6B         |

| Predictions at threshold level 0.75 continued... |               |                         |               |
|--------------------------------------------------|---------------|-------------------------|---------------|
| Gene1 of predicted pair                          |               | Gene2 of predicted pair |               |
| Systematic Name                                  | Standard Name | Systematic Name         | Standard Name |
| YNL218W                                          | MGS1          | YMR284W                 | YKU70         |
| YHR060W                                          | VMA22         | YAL002W                 | VPS8          |
| YPL046C                                          | ELC1          | YER059W                 | PCL6          |
| YOR106W                                          | VAM3          | YOL018C                 | TLG2          |
| YMR273C                                          | ZDS1          | YBR009C                 | HHF1          |
| YDR383C                                          | NKP1          | YNL248C                 | RPA49         |
| YBR200W                                          | BEM1          | YJL187C                 | SWE1          |
| YGR019W                                          | UGA1          | YHR012W                 | VPS29         |
| YOR337W                                          | TEA1          | YDR477W                 | SNF1          |
| YGL212W                                          | VAM7          | YER040W                 | GLN3          |
| YKR035W-A                                        | DID2          | YPL195W                 | APL5          |
| YPL024W                                          | RMI1          | YBR278W                 | DPB3          |
| YGL054C                                          | ERV14         | YML067C                 | ERV41         |
| YDL155W                                          | CLB3          | YGL124C                 | MON1          |
| YNL325C                                          | FIG4          | YGL212W                 | VAM7          |
| YEL065W                                          | SIT1          | YFR031C-A               | RPL2A         |
| YDR137W                                          | RGP1          | YGL124C                 | MON1          |
| YER116C                                          | SLX8          | YDR076W                 | RAD55         |
| YBR127C                                          | VMA2          | YKL080W                 | VMA5          |
| YDL116W                                          | NUP84         | YML016C                 | PPZ1          |
| YLR083C                                          | EMP70         | YDR202C                 | RAV2          |
| YGL054C                                          | ERV14         | YJR060W                 | CBF1          |
| YDR363W-A                                        | SEM1          | YDL226C                 | GCS1          |
| YLR095C                                          | IOC2          | YOR337W                 | TEA1          |
| YNL325C                                          | FIG4          | YDL184C                 | RPL41A        |
| YIL053W                                          | RHR2          | YOR043W                 | WHI2          |
| YPL152W                                          | RRD2          | YPR046W                 | MCM16         |
| YOR080W                                          | DIA2          | YLR350W                 | ORM2          |
| YMR284W                                          | YKU70         | YPL022W                 | RAD1          |



| Predictions at threshold level 0.75 continued... |               |                         |               |
|--------------------------------------------------|---------------|-------------------------|---------------|
| Gene1 of predicted pair                          |               | Gene2 of predicted pair |               |
| Systematic Name                                  | Standard Name | Systematic Name         | Standard Name |
| YBR215W                                          | HPC2          | YBR195C                 | MSI1          |
| YDL116W                                          | NUP84         | YLR135W                 | SLX4          |
| YHR084W                                          | STE12         | YDR103W                 | STE5          |
| YLR386W                                          | VAC14         | YDR289C                 | RTT103        |
| YNL087W                                          | TCB2          | YPR046W                 | MCM16         |
| YGL078C                                          | DBP3          | YOR270C                 | VPH1          |
| YER115C                                          | SPR6          | YNL199C                 | GCR2          |
| YER144C                                          | UBP5          | YFR036W                 | CDC26         |
| YLR018C                                          | POM34         | YLR079W                 | SIC1          |
| YKR001C                                          | VPS1          | YPL161C                 | BEM4          |
| YKL032C                                          | IXR1          | YOL081W                 | IRA2          |
| YGR104C                                          | SRB5          | YLR399C                 | BDF1          |
| YLR386W                                          | VAC14         | YJL172W                 | CPS1          |
| YPL195W                                          | APL5          | YNR032W                 | PPG1          |
| YJR059W                                          | PTK2          | YMR153W                 | NUP53         |
| YGL175C                                          | SAE2          | YJR090C                 | GRR1          |
| YMR004W                                          | MVP1          | YER120W                 | SCS2          |
| YPL022W                                          | RAD1          | YDR363W-A               | SEM1          |
| YIL034C                                          | CAP2          | YDR318W                 | MCM21         |
| YJR063W                                          | RPA12         | YBR289W                 | SNF5          |
| YPL042C                                          | SSN3          | YFR010W                 | UBP6          |
| YEL044W                                          | IES6          | YDL223C                 | HBT1          |
| YIL008W                                          | URM1          | YOL067C                 | RTG1          |
| YML115C                                          | VAN1          | YLR032W                 | RAD5          |
| YBL103C                                          | RTG3          | YOL108C                 | INO4          |
| YER162C                                          | RAD4          | YPR119W                 | CLB2          |
| YHR012W                                          | VPS29         | YKR030W                 | GMH1          |
| YML095C                                          | RAD10         | YPR119W                 | CLB2          |
| YGR104C                                          | SRB5          | YPL042C                 | SSN3          |

| Predictions at threshold level 0.75 continued... |               |                         |               |
|--------------------------------------------------|---------------|-------------------------|---------------|
| Gene1 of predicted pair                          |               | Gene2 of predicted pair |               |
| Systematic Name                                  | Standard Name | Systematic Name         | Standard Name |
| YDR202C                                          | RAV2          | YPL195W                 | APL5          |
| YPL022W                                          | RAD1          | YJL058C                 | BIT61         |
| YLR006C                                          | SSK1          | YNR031C                 | SSK2          |
| YLR447C                                          | VMA6          | YER072W                 | VTC1          |
| YFR010W                                          | UBP6          | YNL087W                 | TCB2          |
| YLR441C                                          | RPS1A         | YDL083C                 | RPS16B        |
| YER096W                                          | SHC1          | YPL256C                 | CLN2          |
| YDL184C                                          | RPL41A        | YNL041C                 | COG6          |
| YKL116C                                          | PRR1          | YGL115W                 | SNF4          |
| YOR066W                                          | MSA1          | YMR230W                 | RPS10B        |
| YHR115C                                          | DMA1          | YGL252C                 | RTG2          |
| YJR056C                                          | YJR056C       | YMR133W                 | REC114        |
| YER114C                                          | BOI2          | YBL085W                 | BOI1          |
| YOR106W                                          | VAM3          | YPR028W                 | YOP1          |
| YPR018W                                          | RLF2          | YLR032W                 | RAD5          |
| YGR104C                                          | SRB5          | YHL031C                 | GOS1          |
| YLR360W                                          | VPS38         | YHR060W                 | VMA22         |
| YJL154C                                          | VPS35         | YDR153C                 | ENT5          |
| YBR195C                                          | MSI1          | YNL183C                 | NPR1          |
| YJR056C                                          | YJR056C       | YBR036C                 | CSG2          |
| YNL291C                                          | MID1          | YDR153C                 | ENT5          |
| YEL065W                                          | SIT1          | YBR036C                 | CSG2          |
| YOR145C                                          | PNO1          | YHR081W                 | LRP1          |
| YIL076W                                          | SEC28         | YNL087W                 | TCB2          |
| YER161C                                          | SPT2          | YMR038C                 | CCS1          |
| YIL034C                                          | CAP2          | YKL213C                 | DOA1          |
| YLR119W                                          | SRN2          | YNR006W                 | VPS27         |
| YJL060W                                          | BNA3          | YGL003C                 | CDH1          |
| YMR224C                                          | MRE11         | YGL003C                 | CDH1          |

| Predictions at threshold level 0.75 continued... |               |                         |               |
|--------------------------------------------------|---------------|-------------------------|---------------|
| Gene1 of predicted pair                          |               | Gene2 of predicted pair |               |
| Systematic Name                                  | Standard Name | Systematic Name         | Standard Name |
| YLR386W                                          | VAC14         | YJR135C                 | MCM22         |
| YPR051W                                          | MAK3          | YMR054W                 | STV1          |
| YHR200W                                          | RPN10         | YFL007W                 | BLM10         |
| YJL187C                                          | SWE1          | YOL090W                 | MSH2          |
| YLR288C                                          | MEC3          | YOR039W                 | CKB2          |
| YOR001W                                          | RRP6          | YLR350W                 | ORM2          |
| YKL032C                                          | IXR1          | YBL072C                 | RPS8A         |
| YAL024C                                          | LTE1          | YNL107W                 | YAF9          |
| YNL307C                                          | MCK1          | YER044C                 | ERG28         |
| YDR202C                                          | RAV2          | YKR001C                 | VPS1          |
| YML071C                                          | COG8          | YER040W                 | GLN3          |
| YKL010C                                          | UFD4          | YGL200C                 | EMP24         |
| YNL087W                                          | TCB2          | YNL076W                 | MKS1          |
| YGL163C                                          | RAD54         | YIL103W                 | DPH1          |
| YJL053W                                          | PEP8          | YOR106W                 | VAM3          |
| YDL185W                                          | TFP1          | YKL080W                 | VMA5          |
| YLR150W                                          | STM1          | YPR120C                 | CLB5          |
| YGR135W                                          | PRE9          | YGL031C                 | RPL24A        |
| YER116C                                          | SLX8          | YMR231W                 | PEP5          |
| YDL122W                                          | UBP1          | YPR119W                 | CLB2          |
| YDR137W                                          | RGP1          | YPR030W                 | CSR2          |
| YDR225W                                          | HTA1          | YKL101W                 | HSL1          |
| YLR148W                                          | PEP3          | YOR036W                 | PEP12         |
| YNL236W                                          | SIN4          | YOR141C                 | ARP8          |
| YBL008W                                          | HIR1          | YPR046W                 | MCM16         |
| YER162C                                          | RAD4          | YMR230W                 | RPS10B        |
| YJR106W                                          | ECM27         | YOR071C                 | THI71         |
| YPL115C                                          | BEM3          | YPL256C                 | CLN2          |
| YDR146C                                          | SWI5          | YOR038C                 | HIR2          |

| Predictions at threshold level 0.75 continued... |               |                         |               |
|--------------------------------------------------|---------------|-------------------------|---------------|
| Gene1 of predicted pair                          |               | Gene2 of predicted pair |               |
| Systematic Name                                  | Standard Name | Systematic Name         | Standard Name |
| YKL048C                                          | ELM1          | YGL252C                 | RTG2          |
| YPL057C                                          | SUR1          | YDL083C                 | RPS16B        |
| YMR172W                                          | HOT1          | YOR132W                 | VPS17         |
| YPR101W                                          | SNT309        | YBR114W                 | RAD16         |
| YPL115C                                          | BEM3          | YGL253W                 | HXK2          |
| YIL159W                                          | BNR1          | YFR036W                 | CDC26         |
| YPL045W                                          | VPS16         | YAL002W                 | VPS8          |
| YDR137W                                          | RGP1          | YDL223C                 | HBT1          |
| YLR288C                                          | MEC3          | YDL002C                 | NHP10         |
| YGL025C                                          | PGD1          | YHR200W                 | RPN10         |
| YDL155W                                          | CLB3          | YDR155C                 | CPR1          |
| YNL145W                                          | MFA2          | YKR026C                 | GCN3          |
| YBR041W                                          | FAT1          | YJL183W                 | MNN11         |
| YDR507C                                          | GIN4          | YBL087C                 | RPL23A        |
| YNL243W                                          | SLA2          | YIL002C                 | INP51         |
| YER144C                                          | UBP5          | YOL111C                 | MDY2          |
| YBR194W                                          | SOY1          | YEL013W                 | VAC8          |
| YKL010C                                          | UFD4          | YLR425W                 | TUS1          |
| YDR443C                                          | SSN2          | YOR014W                 | RTS1          |
| YBR217W                                          | ATG12         | YGL115W                 | SNF4          |
| YML016C                                          | PPZ1          | YHR108W                 | GGA2          |
| YLR119W                                          | SRN2          | YKR035W-A               | DID2          |
| YBR200W                                          | BEM1          | YOR212W                 | STE4          |
| YNL020C                                          | ARK1          | YCR088W                 | ABP1          |
| YJL190C                                          | RPS22A        | YAL002W                 | VPS8          |
| YML038C                                          | YMD8          | YEL053C                 | MAK10         |
| YKL185W                                          | ASH1          | YFR001W                 | LOC1          |
| YLR386W                                          | VAC14         | YDR264C                 | AKR1          |
| YMR142C                                          | RPL13B        | YDL192W                 | ARF1          |

| Predictions at threshold level 0.75 continued... |               |                         |               |
|--------------------------------------------------|---------------|-------------------------|---------------|
| Gene1 of predicted pair                          |               | Gene2 of predicted pair |               |
| Systematic Name                                  | Standard Name | Systematic Name         | Standard Name |
| YPL115C                                          | BEM3          | YJR135C                 | MCM22         |
| YFR031C-A                                        | RPL2A         | YHL031C                 | GOS1          |
| YOR112W                                          | CEX1          | YDL006W                 | PTC1          |
| YPL253C                                          | VIK1          | YLR182W                 | SWI6          |
| YLR386W                                          | VAC14         | YOR043W                 | WHI2          |
| YKR061W                                          | KTR2          | YDR289C                 | RTT103        |
| YNL068C                                          | FKH2          | YHR115C                 | DMA1          |
| YGL078C                                          | DBP3          | YOL111C                 | MDY2          |
| YDR469W                                          | SDC1          | YNL107W                 | YAF9          |
| YBR217W                                          | ATG12         | YBR036C                 | CSG2          |
| YPL234C                                          | TFP3          | YNL051W                 | COG5          |
| YPL246C                                          | RBD2          | YML057W                 | CMP2          |
| YDR261C                                          | EXG2          | YER122C                 | GLO3          |
| YDR108W                                          | GSG1          | YMR216C                 | SKY1          |
| YDL223C                                          | HBT1          | YOR312C                 | RPL20B        |
| YJL053W                                          | PEP8          | YHR060W                 | VMA22         |
| YKL032C                                          | IXR1          | YHR111W                 | UBA4          |
| YGR217W                                          | CCH1          | YBR131W                 | CCZ1          |
| YHR134W                                          | WSS1          | YLR386W                 | VAC14         |
| YPL057C                                          | SUR1          | YDR310C                 | SUM1          |
| YDL184C                                          | RPL41A        | YLR441C                 | RPS1A         |
| YDL077C                                          | VAM6          | YAL002W                 | VPS8          |
| YPL256C                                          | CLN2          | YJL187C                 | SWE1          |
| YJL172W                                          | CPS1          | YEL060C                 | PRB1          |
| YNL041C                                          | COG6          | YHR081W                 | LRP1          |
| YBR171W                                          | SEC66         | YOR358W                 | HAP5          |
| YBR112C                                          | CYC8          | YNL167C                 | SKO1          |
| YLL007C                                          | YLL007C       | YGR108W                 | CLB1          |
| YNL069C                                          | RPL16B        | YJL004C                 | SYS1          |

| Predictions at threshold level 0.75 continued... |               |                         |               |
|--------------------------------------------------|---------------|-------------------------|---------------|
| Gene1 of predicted pair                          |               | Gene2 of predicted pair |               |
| Systematic Name                                  | Standard Name | Systematic Name         | Standard Name |
| YKR020W                                          | VPS51         | YAL030W                 | SNC1          |
| YOL090W                                          | MSH2          | YOR368W                 | RAD17         |
| YLR079W                                          | SIC1          | YGL252C                 | RTG2          |
| YLR337C                                          | VRP1          | YPL234C                 | TFP3          |
| YFR036W                                          | CDC26         | YBL025W                 | RRN10         |
| YMR116C                                          | ASC1          | YOL030W                 | GAS5          |
| YKR061W                                          | KTR2          | YLR254C                 | NDL1          |
| YJL129C                                          | TRK1          | YGR262C                 | BUD32         |
| YFR031C-A                                        | RPL2A         | YDL184C                 | RPL41A        |
| YKR001C                                          | VPS1          | YOL018C                 | TLG2          |
| YGR014W                                          | MSB2          | YMR089C                 | YTA12         |
| YJR135C                                          | MCM22         | YDR183W                 | PLP1          |
| YJR063W                                          | RPA12         | YJR135C                 | MCM22         |
| YBR217W                                          | ATG12         | YDR207C                 | UME6          |
| YIL034C                                          | CAP2          | YDL020C                 | RPN4          |
| YHR200W                                          | RPN10         | YIL008W                 | URM1          |
| YMR224C                                          | MRE11         | YOR368W                 | RAD17         |
| YKR001C                                          | VPS1          | YKR020W                 | VPS51         |
| YPR017C                                          | DSS4          | YER120W                 | SCS2          |
| YGL078C                                          | DBP3          | YOR066W                 | MSA1          |
| YJL124C                                          | LSM1          | YKL048C                 | ELM1          |
| YHR156C                                          | LIN1          | YML115C                 | VAN1          |
| YKL048C                                          | ELM1          | YER162C                 | RAD4          |
| YNR072W                                          | HXT17         | YPL195W                 | APL5          |
| YDR439W                                          | LRS4          | YKL048C                 | ELM1          |
| YFR010W                                          | UBP6          | YMR153W                 | NUP53         |
| YHR156C                                          | LIN1          | YOR035C                 | SHE4          |
| YMR224C                                          | MRE11         | YER044C                 | ERG28         |
| YOR106W                                          | VAM3          | YDR207C                 | UME6          |

| Predictions at threshold level 0.75 continued... |               |                         |               |
|--------------------------------------------------|---------------|-------------------------|---------------|
| Gene1 of predicted pair                          |               | Gene2 of predicted pair |               |
| Systematic Name                                  | Standard Name | Systematic Name         | Standard Name |
| YPR051W                                          | MAK3          | YNL127W                 | FAR11         |
| YHR200W                                          | RPN10         | YMR311C                 | GLC8          |
| YKL032C                                          | IXR1          | YKR001C                 | VPS1          |
| YDL059C                                          | RAD59         | YHR010W                 | RPL27A        |
| YMR055C                                          | BUB2          | YJR060W                 | CBF1          |
| YOR127W                                          | RGA1          | YPL256C                 | CLN2          |
| YLR386W                                          | VAC14         | YNL079C                 | TPM1          |
| YER116C                                          | SLX8          | YOR043W                 | WHI2          |
| YML103C                                          | NUP188        | YML112W                 | CTK3          |
| YDR076W                                          | RAD55         | YML028W                 | TSA1          |
| YOR195W                                          | SLK19         | YGL163C                 | RAD54         |
| YDR383C                                          | NKP1          | YKL048C                 | ELM1          |
| YLR371W                                          | ROM2          | YER040W                 | GLN3          |
| YOR106W                                          | VAM3          | YGL054C                 | ERV14         |
| YKR057W                                          | RPS21A        | YOR275C                 | RIM20         |
| YPR084W                                          | YPR084W       | YLR309C                 | IMH1          |
| YGL078C                                          | DBP3          | YML115C                 | VAN1          |
| YDR507C                                          | GIN4          | YDR379W                 | RGA2          |
| YGL054C                                          | ERV14         | YLR309C                 | IMH1          |
| YMR179W                                          | SPT21         | YJL124C                 | LSM1          |
| YLR018C                                          | POM34         | YER116C                 | SLX8          |
| YPR084W                                          | YPR084W       | YFL013C                 | IES1          |
| YML016C                                          | PPZ1          | YPL018W                 | CTF19         |
| YGR159C                                          | NSR1          | YPL161C                 | BEM4          |
| YDR477W                                          | SNF1          | YJL095W                 | BCK1          |
| YER016W                                          | BIM1          | YGL094C                 | PAN2          |
| YKR101W                                          | SIR1          | YNL031C                 | HHT2          |
| YIL053W                                          | RHR2          | YDR137W                 | RGP1          |
| YCR020C-A                                        | MAK31         | YOR112W                 | CEX1          |

| Predictions at threshold level 0.75 continued... |               |                         |               |
|--------------------------------------------------|---------------|-------------------------|---------------|
| Gene1 of predicted pair                          |               | Gene2 of predicted pair |               |
| Systematic Name                                  | Standard Name | Systematic Name         | Standard Name |
| YFL023W                                          | BUD27         | YER122C                 | GLO3          |
| YNR052C                                          | POP2          | YDR289C                 | RTT103        |
| YOR140W                                          | SFL1          | YEL036C                 | ANP1          |
| YNL079C                                          | TPM1          | YOL110W                 | SHR5          |
| YER116C                                          | SLX8          | YCR086W                 | CSM1          |
| YDR310C                                          | SUM1          | YPR032W                 | SRO7          |
| YPR018W                                          | RLF2          | YFR010W                 | UBP6          |
| YOR001W                                          | RRP6          | YDL047W                 | SIT4          |
| YML115C                                          | VAN1          | YNL032W                 | SIW14         |
| YOR080W                                          | DIA2          | YMR038C                 | CCS1          |
| YDL020C                                          | RPN4          | YBR108W                 | YBR108W       |
| YNR052C                                          | POP2          | YJL141C                 | YAK1          |
| YOR127W                                          | RGA1          | YJR060W                 | CBF1          |
| YBR107C                                          | IML3          | YHR013C                 | ARD1          |
| YDL006W                                          | PTC1          | YHR158C                 | KEL1          |
| YOR337W                                          | TEA1          | YER144C                 | UBP5          |
| YBR173C                                          | UMP1          | YLR452C                 | SST2          |
| YDL160C                                          | DHH1          | YJL124C                 | LSM1          |
| YNL032W                                          | SIW14         | YHR081W                 | LRP1          |
| YOR109W                                          | INP53         | YFL033C                 | RIM15         |
| YLR386W                                          | VAC14         | YNL041C                 | COG6          |
| YDR383C                                          | NKP1          | YOR195W                 | SLK19         |
| YBL079W                                          | NUP170        | YJR090C                 | GRR1          |
| YDR156W                                          | RPA14         | YGL252C                 | RTG2          |
| YML062C                                          | MFT1          | YOL145C                 | CTR9          |
| YPL234C                                          | TFP3          | YML001W                 | YPT7          |
| YDR439W                                          | LRS4          | YAR014C                 | BUD14         |
| YHR203C                                          | RPS4B         | YER102W                 | RPS8B         |
| YBR289W                                          | SNF5          | YNL236W                 | SIN4          |



| Predictions at threshold level 0.75 continued... |               |                         |               |
|--------------------------------------------------|---------------|-------------------------|---------------|
| Gene1 of predicted pair                          |               | Gene2 of predicted pair |               |
| Systematic Name                                  | Standard Name | Systematic Name         | Standard Name |
| YLR234W                                          | TOP3          | YJR140C                 | HIR3          |
| YDR477W                                          | SNF1          | YCR084C                 | TUP1          |
| YER144C                                          | UBP5          | YER044C                 | ERG28         |
| YPR032W                                          | SRO7          | YDR207C                 | UME6          |
| YGR217W                                          | CCH1          | YJL117W                 | PHO86         |
| YBR173C                                          | UMP1          | YLR320W                 | MMS22         |
| YLR288C                                          | MEC3          | YJR140C                 | HIR3          |
| YKL116C                                          | PRR1          | YBR108W                 | YBR108W       |
| YLR381W                                          | CTF3          | YBL021C                 | HAP3          |
| YBR108W                                          | YBR108W       | YOR284W                 | HUA2          |
| YLR360W                                          | VPS38         | YGL095C                 | VPS45         |
| YDL184C                                          | RPL41A        | YEL060C                 | PRB1          |
| YER144C                                          | UBP5          | YDR310C                 | SUM1          |
| YDR192C                                          | NUP42         | YML103C                 | NUP188        |
| YDR108W                                          | GSG1          | YJR040W                 | GEF1          |
| YGL003C                                          | CDH1          | YLR180W                 | SAM1          |
| YKR026C                                          | GCN3          | YNL147W                 | LSM7          |
| YHR012W                                          | VPS29         | YDR207C                 | UME6          |
| YLR148W                                          | PEP3          | YKR001C                 | VPS1          |
| YEL051W                                          | VMA8          | YNL127W                 | FAR11         |
| YMR224C                                          | MRE11         | YBR173C                 | UMP1          |
| YER122C                                          | GLO3          | YLR180W                 | SAM1          |
| YDL223C                                          | HBT1          | YJL183W                 | MNN11         |
| YDR456W                                          | NHX1          | YER049W                 | TPA1          |
| YLR206W                                          | ENT2          | YIL079C                 | AIR1          |
| YKL025C                                          | PAN3          | YLL007C                 | YLL007C       |
| YDL160C                                          | DHH1          | YKR059W                 | TIF1          |
| YGL115W                                          | SNF4          | YJR084W                 | CSN12         |
| YGL147C                                          | RPL9A         | YMR133W                 | REC114        |

| Predictions at threshold level 0.75 continued... |               |                         |               |
|--------------------------------------------------|---------------|-------------------------|---------------|
| Gene1 of predicted pair                          |               | Gene2 of predicted pair |               |
| Systematic Name                                  | Standard Name | Systematic Name         | Standard Name |
| YGR188C                                          | BUB1          | YDR310C                 | SUM1          |
| YER162C                                          | RAD4          | YNL127W                 | FAR11         |
| YBR108W                                          | YBR108W       | YML001W                 | YPT7          |
| YHR039C-A                                        | VMA10         | YPL195W                 | APL5          |
| YHR013C                                          | ARD1          | YAL002W                 | VPS8          |
| YBL051C                                          | PIN4          | YML095C                 | RAD10         |
| YER116C                                          | SLX8          | YPL195W                 | APL5          |
| YBR131W                                          | CCZ1          | YOR275C                 | RIM20         |
| YJL095W                                          | BCK1          | YEL060C                 | PRB1          |
| YGR104C                                          | SRB5          | YFR034C                 | PHO4          |
| YOR039W                                          | CKB2          | YBR200W                 | BEM1          |
| YOR270C                                          | VPH1          | YJR084W                 | CSN12         |
| YDR490C                                          | PKH1          | YKL126W                 | YPK1          |
| YPR017C                                          | DSS4          | YOR132W                 | VPS17         |
| YIL076W                                          | SEC28         | YCR077C                 | PAT1          |
| YOL054W                                          | PSH1          | YLR182W                 | SWI6          |
| YDR225W                                          | HTA1          | YBR107C                 | IML3          |
| YMR052W                                          | FAR3          | YPR119W                 | CLB2          |
| YNL068C                                          | FKH2          | YDR264C                 | AKR1          |
| YHR081W                                          | LRP1          | YBR036C                 | CSG2          |
| YOR096W                                          | RPS7A         | YBL072C                 | RPS8A         |
| YEL065W                                          | SIT1          | YLR386W                 | VAC14         |
| YGL163C                                          | RAD54         | YDR183W                 | PLP1          |
| YDR129C                                          | SAC6          | YLR425W                 | TUS1          |
| YNL127W                                          | FAR11         | YNL107W                 | YAF9          |
| YBR127C                                          | VMA2          | YDR323C                 | PEP7          |
| YLR148W                                          | PEP3          | YGR241C                 | YAP1802       |
| YDL013W                                          | SLX5          | YPR119W                 | CLB2          |
| YDR439W                                          | LRS4          | YLR315W                 | NKP2          |

| Predictions at threshold level 0.75 continued... |               |                         |               |
|--------------------------------------------------|---------------|-------------------------|---------------|
| Gene1 of predicted pair                          |               | Gene2 of predicted pair |               |
| Systematic Name                                  | Standard Name | Systematic Name         | Standard Name |
| YOR195W                                          | SLK19         | YDL013W                 | SLX5          |
| YGL025C                                          | PGD1          | YJL183W                 | MNN11         |
| YNL068C                                          | FKH2          | YOR127W                 | RGA1          |
| YMR133W                                          | REC114        | YOL081W                 | IRA2          |
| YDR225W                                          | HTA1          | YDR448W                 | ADA2          |
| YGR019W                                          | UGA1          | YEL056W                 | HAT2          |
| YGR270W                                          | YTA7          | YDL155W                 | CLB3          |
| YGR249W                                          | MGA1          | YPR036W                 | VMA13         |
| YKL010C                                          | UFD4          | YKL006W                 | RPL14A        |
| YPL161C                                          | BEM4          | YML071C                 | COG8          |
| YDR156W                                          | RPA14         | YOR195W                 | SLK19         |
| YBR108W                                          | YBR108W       | YPL018W                 | CTF19         |
| YPR084W                                          | YPR084W       | YDR310C                 | SUM1          |
| YGL147C                                          | RPL9A         | YOL111C                 | MDY2          |
| YER122C                                          | GLO3          | YMR214W                 | SCJ1          |
| YLR170C                                          | APS1          | YJR058C                 | APS2          |
| YOR132W                                          | VPS17         | YAL030W                 | SNC1          |
| YIL159W                                          | BNR1          | YMR230W                 | RPS10B        |
| YNL215W                                          | IES2          | YPL057C                 | SUR1          |
| YPL152W                                          | RRD2          | YHR115C                 | DMA1          |
| YOR337W                                          | TEA1          | YMR133W                 | REC114        |
| YDL083C                                          | RPS16B        | YDR310C                 | SUM1          |
| YLR386W                                          | VAC14         | YBR171W                 | SEC66         |
| YHR052W                                          | CIC1          | YPR119W                 | CLB2          |
| YIL148W                                          | RPL40A        | YPL256C                 | CLN2          |
| YPR051W                                          | MAK3          | YOL067C                 | RTG1          |
| YLR360W                                          | VPS38         | YIL076W                 | SEC28         |
| YMR026C                                          | PEX12         | YJL095W                 | BCK1          |
| YMR224C                                          | MRE11         | YNL087W                 | TCB2          |

| Predictions at threshold level 0.75 continued... |               |                         |               |
|--------------------------------------------------|---------------|-------------------------|---------------|
| Gene1 of predicted pair                          |               | Gene2 of predicted pair |               |
| Systematic Name                                  | Standard Name | Systematic Name         | Standard Name |
| YNL291C                                          | MID1          | YDL006W                 | PTC1          |
| YJR084W                                          | CSN12         | YBR181C                 | RPS6B         |
| YDR153C                                          | ENT5          | YER122C                 | GLO3          |
| YER116C                                          | SLX8          | YBL079W                 | NUP170        |
| YMR055C                                          | BUB2          | YLR370C                 | ARC18         |
| YGR108W                                          | CLB1          | YEL050C                 | RML2          |
| YEL056W                                          | HAT2          | YHR114W                 | BZZ1          |
| YOR078W                                          | BUD21         | YDR025W                 | RPS11A        |
| YDL160C                                          | DHH1          | YPL024W                 | RMI1          |
| YDR443C                                          | SSN2          | YHR200W                 | RPN10         |
| YLR079W                                          | SIC1          | YJL095W                 | BCK1          |
| YJR060W                                          | CBF1          | YOL081W                 | IRA2          |
| YPL057C                                          | SUR1          | YOR014W                 | RTS1          |
| YNL031C                                          | HHT2          | YOR141C                 | ARP8          |
| YKL160W                                          | ELF1          | YJR060W                 | CBF1          |
| YPL024W                                          | RMI1          | YHR156C                 | LIN1          |
| YLR288C                                          | MEC3          | YHR039C-A               | VMA10         |
| YFR036W                                          | CDC26         | YEL060C                 | PRB1          |
| YML001W                                          | YPT7          | YBL025W                 | RRN10         |
| YKL057C                                          | NUP120        | YER105C                 | NUP157        |
| YGR261C                                          | APL6          | YOR112W                 | CEX1          |
| YJR060W                                          | CBF1          | YJR135C                 | MCM22         |
| YDR202C                                          | RAV2          | YGL054C                 | ERV14         |
| YPR051W                                          | MAK3          | YDR183W                 | PLP1          |
| YJL154C                                          | VPS35         | YLR360W                 | VPS38         |
| YDR318W                                          | MCM21         | YBR114W                 | RAD16         |
| YML012W                                          | ERV25         | YJL004C                 | SYS1          |
| YEL009C                                          | GCN4          | YOL051W                 | GAL11         |
| YNL201C                                          | PSY2          | YKL139W                 | CTK1          |

| Predictions at threshold level 0.75 continued... |               |                         |               |
|--------------------------------------------------|---------------|-------------------------|---------------|
| Gene1 of predicted pair                          |               | Gene2 of predicted pair |               |
| Systematic Name                                  | Standard Name | Systematic Name         | Standard Name |
| YGL147C                                          | RPL9A         | YDR477W                 | SNF1          |
| YMR139W                                          | RIM11         | YPR119W                 | CLB2          |
| YPR052C                                          | NHP6A         | YKL139W                 | CTK1          |
| YMR224C                                          | MRE11         | YDR076W                 | RAD55         |
| YLR090W                                          | XDJ1          | YMR311C                 | GLC8          |
| YKL181W                                          | PRS1          | YOR043W                 | WHI2          |
| YJL183W                                          | MNN11         | YER040W                 | GLN3          |
| YLR191W                                          | PEX13         | YAR042W                 | SWH1          |
| YGL215W                                          | CLG1          | YDR137W                 | RGP1          |
| YHR156C                                          | LIN1          | YLR441C                 | RPS1A         |
| YMR153W                                          | NUP53         | YEL060C                 | PRB1          |
| YJL127C                                          | SPT10         | YDR200C                 | VPS64         |
| YAL024C                                          | LTE1          | YPR119W                 | CLB2          |
| YJL124C                                          | LSM1          | YPL057C                 | SUR1          |
| YHR016C                                          | YSC84         | YKR030W                 | GMH1          |
| YLR441C                                          | RPS1A         | YDR137W                 | RGP1          |
| YDL185W                                          | TFP1          | YOL081W                 | IRA2          |
| YDR363W-A                                        | SEM1          | YJL140W                 | RPB4          |
| YPL253C                                          | VIK1          | YNL248C                 | RPA49         |
| YMR127C                                          | SAS2          | YJR032W                 | CPR7          |
| YBR258C                                          | SHG1          | YPL161C                 | BEM4          |
| YMR016C                                          | SOK2          | YMR311C                 | GLC8          |
| YFR010W                                          | UBP6          | YLR032W                 | RAD5          |
| YLR441C                                          | RPS1A         | YJL183W                 | MNN11         |
| YBR200W                                          | BEM1          | YGL025C                 | PGD1          |
| YOR312C                                          | RPL20B        | YBL025W                 | RRN10         |
| YNL307C                                          | MCK1          | YPL195W                 | APL5          |
| YMR153W                                          | NUP53         | YML007W                 | YAP1          |
| YML071C                                          | COG8          | YOR035C                 | SHE4          |

| Predictions at threshold level 0.75 continued... |               |                         |               |
|--------------------------------------------------|---------------|-------------------------|---------------|
| Gene1 of predicted pair                          |               | Gene2 of predicted pair |               |
| Systematic Name                                  | Standard Name | Systematic Name         | Standard Name |
| YNL330C                                          | RPD3          | YBR089C-A               | NHP6B         |
| YLR095C                                          | IOC2          | YLR094C                 | GIS3          |
| YJR060W                                          | CBF1          | YFR030W                 | MET10         |
| YEL027W                                          | CUP5          | YDL185W                 | TFP1          |
| YPR171W                                          | BSP1          | YPL050C                 | MNN9          |
| YDR293C                                          | SSD1          | YAL002W                 | VPS8          |
| YBR200W                                          | BEM1          | YEL036C                 | ANP1          |
| YDR310C                                          | SUM1          | YLR350W                 | ORM2          |
| YOR337W                                          | TEA1          | YDR310C                 | SUM1          |
| YOR001W                                          | RRP6          | YDR245W                 | MNN10         |
| YNL215W                                          | IES2          | YGL161C                 | YIP5          |
| YMR199W                                          | CLN1          | YLR452C                 | SST2          |
| YJL006C                                          | CTK2          | YCR086W                 | CSM1          |
| YEL065W                                          | SIT1          | YER139C                 | YER139C       |
| YDR507C                                          | GIN4          | YKL032C                 | IXR1          |
| YGL174W                                          | BUD13         | YBR036C                 | CSG2          |
| YNL069C                                          | RPL16B        | YHR060W                 | VMA22         |
| YLR288C                                          | MEC3          | YCR077C                 | PAT1          |
| YBR173C                                          | UMP1          | YMR153W                 | NUP53         |
| YDL020C                                          | RPN4          | YMR172W                 | HOT1          |
| YAL024C                                          | LTE1          | YMR142C                 | RPL13B        |
| YFR010W                                          | UBP6          | YDL077C                 | VAM6          |
| YDR443C                                          | SSN2          | YPL057C                 | SUR1          |
| YEL053C                                          | MAK10         | YOL108C                 | INO4          |
| YPL137C                                          | GIP3          | YBR280C                 | SAF1          |
| YDL155W                                          | CLB3          | YOR014W                 | RTS1          |
| YBL058W                                          | SHP1          | YDL192W                 | ARF1          |
| YBR264C                                          | YPT10         | YKR014C                 | YPT52         |
| YGR252W                                          | GCN5          | YOR038C                 | HIR2          |

| Predictions at threshold level 0.75 continued... |               |                         |               |
|--------------------------------------------------|---------------|-------------------------|---------------|
| Gene1 of predicted pair                          |               | Gene2 of predicted pair |               |
| Systematic Name                                  | Standard Name | Systematic Name         | Standard Name |
| YBL021C                                          | HAP3          | YGL253W                 | HXK2          |
| YER116C                                          | SLX8          | YOL111C                 | MDY2          |
| YLL039C                                          | UBI4          | YGR135W                 | PRE9          |
| YHR178W                                          | STB5          | YER161C                 | SPT2          |
| YML016C                                          | PPZ1          | YGL252C                 | RTG2          |
| YOR069W                                          | VPS5          | YCL037C                 | SRO9          |
| YGL178W                                          | MPT5          | YER068W                 | MOT2          |
| YBR126C                                          | TPS1          | YKL126W                 | YPK1          |
| YNR072W                                          | HXT17         | YKL048C                 | ELM1          |
| YMR224C                                          | MRE11         | YPR030W                 | CSR2          |
| YLR315W                                          | NKP2          | YGR188C                 | BUB1          |
| YBR274W                                          | CHK1          | YDL059C                 | RAD59         |
| YNL054W                                          | VAC7          | YPR120C                 | CLB5          |
| YPR018W                                          | RLF2          | YGL087C                 | MMS2          |
| YNL297C                                          | MON2          | YJR033C                 | RAV1          |
| YBR030W                                          | YBR030W       | YNL076W                 | MKS1          |
| YHR060W                                          | VMA22         | YGL003C                 | CDH1          |
| YAL014C                                          | SYN8          | YJL204C                 | RCY1          |
| YLR452C                                          | SST2          | YER139C                 | YER139C       |
| YGR135W                                          | PRE9          | YFR036W                 | CDC26         |
| YNR072W                                          | HXT17         | YDR310C                 | SUM1          |
| YDL185W                                          | TFP1          | YPR119W                 | CLB2          |
| YLR386W                                          | VAC14         | YOL111C                 | MDY2          |
| YMR224C                                          | MRE11         | YMR153W                 | NUP53         |
| YPL057C                                          | SUR1          | YGL237C                 | HAP2          |
| YHR111W                                          | UBA4          | YOL081W                 | IRA2          |
| YIL053W                                          | RHR2          | YMR142C                 | RPL13B        |
| YDR335W                                          | MSN5          | YKL068W                 | NUP100        |
| YOR039W                                          | CKB2          | YNL030W                 | HHF2          |

| Predictions at threshold level 0.75 continued... |               |                         |               |
|--------------------------------------------------|---------------|-------------------------|---------------|
| Gene1 of predicted pair                          |               | Gene2 of predicted pair |               |
| Systematic Name                                  | Standard Name | Systematic Name         | Standard Name |
| YBR111W-A                                        | SUS1          | YAR002W                 | NUP60         |
| YMR198W                                          | CIK1          | YDR076W                 | RAD55         |
| YPL001W                                          | HAT1          | YDR289C                 | RTT103        |
| YJL006C                                          | CTK2          | YDR183W                 | PLP1          |
| YEL053C                                          | MAK10         | YDL192W                 | ARF1          |
| YJL172W                                          | CPS1          | YML001W                 | YPT7          |
| YKR057W                                          | RPS21A        | YKR048C                 | NAP1          |
| YDL184C                                          | RPL41A        | YOL121C                 | RPS19A        |
| YLR192C                                          | HCR1          | YDR310C                 | SUM1          |
| YJL124C                                          | LSM1          | YNL116W                 | DMA2          |
| YJL176C                                          | SWI3          | YGR105W                 | VMA21         |
| YDR080W                                          | VPS41         | YHR039C-A               | VMA10         |
| YHR073W                                          | OSH3          | YML103C                 | NUP188        |
| YML112W                                          | CTK3          | YNL116W                 | DMA2          |
| YNL243W                                          | SLA2          | YOR106W                 | VAM3          |
| YIL156W                                          | UBP7          | YLR079W                 | SIC1          |
| YJL124C                                          | LSM1          | YHR013C                 | ARD1          |
| YDR484W                                          | VPS52         | YHR039C-A               | VMA10         |
| YBR093C                                          | PHO5          | YMR198W                 | CIK1          |
| YBR020W                                          | GAL1          | YJR060W                 | CBF1          |
| YDR443C                                          | SSN2          | YDR477W                 | SNF1          |
| YOR132W                                          | VPS17         | YIL008W                 | URM1          |
| YNL238W                                          | KEX2          | YJR125C                 | ENT3          |
| YLR288C                                          | MEC3          | YML013W                 | UBX2          |
| YKL139W                                          | CTK1          | YHR060W                 | VMA22         |
| YJL151C                                          | SNA3          | YNL094W                 | APP1          |
| YDR363W-A                                        | SEM1          | YPR046W                 | MCM16         |
| YMR198W                                          | CIK1          | YNL236W                 | SIN4          |
| YLR018C                                          | POM34         | YKL041W                 | VPS24         |



| Predictions at threshold level 0.75 continued... |               |                         |               |
|--------------------------------------------------|---------------|-------------------------|---------------|
| Gene1 of predicted pair                          |               | Gene2 of predicted pair |               |
| Systematic Name                                  | Standard Name | Systematic Name         | Standard Name |
| YOR039W                                          | CKB2          | YLR399C                 | BDF1          |
| YPL129W                                          | TAF14         | YOR140W                 | SFL1          |
| YOR066W                                          | MSA1          | YCR053W                 | THR4          |
| YLR192C                                          | HCR1          | YGL025C                 | PGD1          |
| YDR378C                                          | LSM6          | YHR115C                 | DMA1          |
| YHR012W                                          | VPS29         | YPR032W                 | SRO7          |
| YMR070W                                          | MOT3          | YBR127C                 | VMA2          |
| YIL008W                                          | URM1          | YDR318W                 | MCM21         |
| YLL007C                                          | YLL007C       | YGR019W                 | UGA1          |
| YLR337C                                          | VRP1          | YLR061W                 | RPL22A        |
| YLR090W                                          | XDJ1          | YEL060C                 | PRB1          |
| YMR172W                                          | HOT1          | YLR292C                 | SEC72         |
| YDR137W                                          | RGP1          | YKL080W                 | VMA5          |
| YGR054W                                          | YGR054W       | YDR310C                 | SUM1          |
| YLR119W                                          | SRN2          | YBR171W                 | SEC66         |
| YDR443C                                          | SSN2          | YER049W                 | TPA1          |
| YMR142C                                          | RPL13B        | YKL048C                 | ELM1          |
| YIL076W                                          | SEC28         | YOL108C                 | INO4          |
| YLR119W                                          | SRN2          | YOL081W                 | IRA2          |
| YBR200W                                          | BEM1          | YMR214W                 | SCJ1          |
| YGL066W                                          | SGF73         | YMR199W                 | CLN1          |
| YMR095C                                          | SNO1          | YER122C                 | GLO3          |
| YGL163C                                          | RAD54         | YDR207C                 | UME6          |
| YJR140C                                          | HIR3          | YER161C                 | SPT2          |
| YMR224C                                          | MRE11         | YMR230W                 | RPS10B        |
| YNL094W                                          | APP1          | YLR429W                 | CRN1          |
| YMR224C                                          | MRE11         | YPL057C                 | SUR1          |
| YDR443C                                          | SSN2          | YFR031C-A               | RPL2A         |
| YDR319C                                          | YDR319C       | YDL186W                 | YDL186W       |

| Predictions at threshold level 0.75 continued... |               |                         |               |
|--------------------------------------------------|---------------|-------------------------|---------------|
| Gene1 of predicted pair                          |               | Gene2 of predicted pair |               |
| Systematic Name                                  | Standard Name | Systematic Name         | Standard Name |
| YDR192C                                          | NUP42         | YER116C                 | SLX8          |
| YGR072W                                          | UPF3          | YDR080W                 | VPS41         |
| YPR017C                                          | DSS4          | YNL127W                 | FAR11         |
| YHR060W                                          | VMA22         | YLR452C                 | SST2          |
| YCL029C                                          | BIK1          | YGL190C                 | CDC55         |
| YOR312C                                          | RPL20B        | YOR368W                 | RAD17         |
| YNL069C                                          | RPL16B        | YPL120W                 | VPS30         |
| YOR008C                                          | SLG1          | YER049W                 | TPA1          |
| YPR120C                                          | CLB5          | YPL152W                 | RRD2          |
| YPR051W                                          | MAK3          | YJL095W                 | BCK1          |
| YLR192C                                          | HCR1          | YGR133W                 | PEX4          |
| YFR030W                                          | MET10         | YJR135C                 | MCM22         |
| YBR030W                                          | YBR030W       | YER044C                 | ERG28         |
| YKL007W                                          | CAP1          | YOR208W                 | PTP2          |
| YGL087C                                          | MMS2          | YMR038C                 | CCS1          |
| YHR156C                                          | LIN1          | YBR171W                 | SEC66         |
| YJL154C                                          | VPS35         | YPL037C                 | EGD1          |
| YOR270C                                          | VPH1          | YPL057C                 | SUR1          |
| YML117W                                          | NAB6          | YKL048C                 | ELM1          |
| YBL102W                                          | SFT2          | YEL051W                 | VMA8          |
| YBR290W                                          | BSD2          | YGL124C                 | MON1          |
| YKL139W                                          | CTK1          | YBR200W                 | BEM1          |
| YJR056C                                          | YJR056C       | YPR030W                 | CSR2          |
| YNL201C                                          | PSY2          | YPR046W                 | MCM16         |
| YPL161C                                          | BEM4          | YKL080W                 | VMA5          |
| YOR337W                                          | TEA1          | YNL087W                 | TCB2          |
| YIL053W                                          | RHR2          | YER116C                 | SLX8          |
| YOR033C                                          | EXO1          | YLR313C                 | SPH1          |
| YGR019W                                          | UGA1          | YDR155C                 | CPR1          |

| Predictions at threshold level 0.75 continued... |               |                         |               |
|--------------------------------------------------|---------------|-------------------------|---------------|
| Gene1 of predicted pair                          |               | Gene2 of predicted pair |               |
| Systematic Name                                  | Standard Name | Systematic Name         | Standard Name |
| YOR332W                                          | VMA4          | YBR200W                 | BEM1          |
| YLR240W                                          | VPS34         | YJL053W                 | PEP8          |
| YPL129W                                          | TAF14         | YGL246C                 | RAI1          |
| YMR116C                                          | ASC1          | YGL212W                 | VAM7          |
| YOR023C                                          | AHC1          | YDR183W                 | PLP1          |
| YAL024C                                          | LTE1          | YAL002W                 | VPS8          |
| YER110C                                          | KAP123        | YPL256C                 | CLN2          |
| YMR224C                                          | MRE11         | YHR178W                 | STB5          |
| YLR090W                                          | XDJ1          | YHR081W                 | LRP1          |
| YGL066W                                          | SGF73         | YBL087C                 | RPL23A        |
| YPR018W                                          | RLF2          | YLR288C                 | MEC3          |
| YHR060W                                          | VMA22         | YNL051W                 | COG5          |
| YNL032W                                          | SIW14         | YPR030W                 | CSR2          |
| YMR055C                                          | BUB2          | YHL002W                 | HSE1          |
| YDR004W                                          | RAD57         | YJR140C                 | HIR3          |
| YDR171W                                          | HSP42         | YNL236W                 | SIN4          |
| YDL154W                                          | MSH5          | YPL178W                 | CBC2          |
| YDR080W                                          | VPS41         | YDL077C                 | VAM6          |
| YHR013C                                          | ARD1          | YHR115C                 | DMA1          |
| YBR200W                                          | BEM1          | YCR088W                 | ABP1          |
| YLR399C                                          | BDF1          | YIL103W                 | DPH1          |
| YDR080W                                          | VPS41         | YMR054W                 | STV1          |
| YML038C                                          | YMD8          | YPR032W                 | SRO7          |
| YIL034C                                          | CAP2          | YBR290W                 | BSD2          |
| YJL053W                                          | PEP8          | YPL120W                 | VPS30         |
| YHR012W                                          | VPS29         | YER122C                 | GLO3          |
| YOL126C                                          | MDH2          | YCR024C-A               | PMP1          |
| YPR084W                                          | YPR084W       | YOR127W                 | RGA1          |
| YDR496C                                          | PUF6          | YDR101C                 | ARX1          |

| Predictions at threshold level 0.75 continued... |               |                         |               |
|--------------------------------------------------|---------------|-------------------------|---------------|
| Gene1 of predicted pair                          |               | Gene2 of predicted pair |               |
| Systematic Name                                  | Standard Name | Systematic Name         | Standard Name |
| YOR195W                                          | SLK19         | YIL033C                 | BCY1          |
| YGL147C                                          | RPL9A         | YLR119W                 | SRN2          |
| YLR079W                                          | SIC1          | YHR013C                 | ARD1          |
| YGL147C                                          | RPL9A         | YKL126W                 | YPK1          |
| YPL037C                                          | EGD1          | YDR261C                 | EXG2          |
| YBL051C                                          | PIN4          | YDR254W                 | CHL4          |
| YGR249W                                          | MGA1          | YDL192W                 | ARF1          |
| YJL124C                                          | LSM1          | YGR188C                 | BUB1          |
| YER044C                                          | ERG28         | YGL115W                 | SNF4          |
| YFL013C                                          | IES1          | YNL107W                 | YAF9          |
| YDL006W                                          | PTC1          | YKR030W                 | GMH1          |
| YDR318W                                          | MCM21         | YBR036C                 | CSG2          |
| YBR171W                                          | SEC66         | YPR046W                 | MCM16         |
| YGL078C                                          | DBP3          | YGR159C                 | NSR1          |
| YDR507C                                          | GIN4          | YKR057W                 | RPS21A        |
| YPL024W                                          | RMI1          | YLR452C                 | SST2          |
| YDR137W                                          | RGP1          | YKR035W-A               | DID2          |
| YNL025C                                          | SSN8          | YNL107W                 | YAF9          |
| YJL154C                                          | VPS35         | YLR386W                 | VAC14         |
| YIL034C                                          | CAP2          | YIL008W                 | URM1          |
| YBL021C                                          | HAP3          | YBR107C                 | IML3          |
| YMR109W                                          | MYO5          | YGL253W                 | HXK2          |
| YBR171W                                          | SEC66         | YPR119W                 | CLB2          |
| YDR293C                                          | SSD1          | YGR108W                 | CLB1          |
| YOL111C                                          | MDY2          | YEL053C                 | MAK10         |
| YLR410W                                          | VIP1          | YJL187C                 | SWE1          |
| YAL056W                                          | GPB2          | YJL106W                 | IME2          |
| YEL051W                                          | VMA8          | YKL080W                 | VMA5          |
| YNL291C                                          | MID1          | YLR032W                 | RAD5          |

| Predictions at threshold level 0.75 continued... |               |                         |               |
|--------------------------------------------------|---------------|-------------------------|---------------|
| Gene1 of predicted pair                          |               | Gene2 of predicted pair |               |
| Systematic Name                                  | Standard Name | Systematic Name         | Standard Name |
| YNL058C                                          | YNL058C       | YMR230W                 | RPS10B        |
| YNL206C                                          | RTT106        | YBR010W                 | HHT1          |
| YLL007C                                          | YLL007C       | YMR172W                 | HOT1          |
| YDR293C                                          | SSD1          | YPL180W                 | TCO89         |
| YNL199C                                          | GCR2          | YBR260C                 | RGD1          |
| YMR199W                                          | CLN1          | YHR010W                 | RPL27A        |
| YEL053C                                          | MAK10         | YNL107W                 | YAF9          |
| YMR055C                                          | BUB2          | YER162C                 | RAD4          |
| YER144C                                          | UBP5          | YGL115W                 | SNF4          |
| YPL115C                                          | BEM3          | YGL124C                 | MON1          |
| YOR043W                                          | WHI2          | YDR318W                 | MCM21         |
| YNL293W                                          | MSB3          | YDR310C                 | SUM1          |
| YNL215W                                          | IES2          | YDR289C                 | RTT103        |
| YDR129C                                          | SAC6          | YOR036W                 | PEP12         |
| YKL025C                                          | PAN3          | YJL183W                 | MNN11         |
| YMR198W                                          | CIK1          | YDR171W                 | HSP42         |
| YIR002C                                          | MPH1          | YGL163C                 | RAD54         |
| YPL152W                                          | RRD2          | YJL187C                 | SWE1          |
| YNL238W                                          | KEX2          | YOR035C                 | SHE4          |
| YCR020C-A                                        | MAK31         | YNL291C                 | MID1          |
| YDL160C                                          | DHH1          | YGR252W                 | GCN5          |
| YDR171W                                          | HSP42         | YGL003C                 | CDH1          |
| YLR058C                                          | SHM2          | YMR055C                 | BUB2          |
| YPL037C                                          | EGD1          | YKL048C                 | ELM1          |
| YJL004C                                          | SYS1          | YLR144C                 | ACF2          |
| YLR148W                                          | PEP3          | YLR240W                 | VPS34         |
| YHR039C-A                                        | VMA10         | YLR370C                 | ARC18         |
| YBR017C                                          | KAP104        | YDR335W                 | MSN5          |
| YMR224C                                          | MRE11         | YAL002W                 | VPS8          |

| Predictions at threshold level 0.75 continued... |               |                         |               |
|--------------------------------------------------|---------------|-------------------------|---------------|
| Gene1 of predicted pair                          |               | Gene2 of predicted pair |               |
| Systematic Name                                  | Standard Name | Systematic Name         | Standard Name |
| YDR080W                                          | VPS41         | YMR231W                 | PEP5          |
| YDL116W                                          | NUP84         | YKR072C                 | SIS2          |
| YFR010W                                          | UBP6          | YBR280C                 | SAF1          |
| YLR320W                                          | MMS22         | YBR019C                 | GAL10         |
| YDR225W                                          | HTA1          | YPL248C                 | GAL4          |
| YOR033C                                          | EXO1          | YFR010W                 | UBP6          |
| YIL053W                                          | RHR2          | YLR386W                 | VAC14         |
| YDR293C                                          | SSD1          | YKL119C                 | VPH2          |
| YHR200W                                          | RPN10         | YGL163C                 | RAD54         |
| YPR046W                                          | MCM16         | YML028W                 | TSA1          |
| YOR290C                                          | SNF2          | YGL115W                 | SNF4          |
| YPL024W                                          | RMI1          | YLR370C                 | ARC18         |
| YNL307C                                          | MCK1          | YOR327C                 | SNC2          |
| YCR081W                                          | SRB8          | YNL079C                 | TPM1          |
| YGR108W                                          | CLB1          | YPL018W                 | CTF19         |
| YPL045W                                          | VPS16         | YDL226C                 | GCS1          |
| YHR156C                                          | LIN1          | YOL111C                 | MDY2          |
| YBR083W                                          | TEC1          | YDL159W                 | STE7          |
| YGL115W                                          | SNF4          | YPL106C                 | SSE1          |
| YBR200W                                          | BEM1          | YGR134W                 | CAF130        |
| YHR200W                                          | RPN10         | YMR214W                 | SCJ1          |
| YPL037C                                          | EGD1          | YNL127W                 | FAR11         |
| YOR127W                                          | RGA1          | YML109W                 | ZDS2          |
| YPL024W                                          | RMI1          | YOR043W                 | WHI2          |
| YLR423C                                          | ATG17         | YPR185W                 | ATG13         |
| YGR081C                                          | SLX9          | YGL175C                 | SAE2          |
| YGL060W                                          | YBP2          | YPL022W                 | RAD1          |
| YBR215W                                          | HPC2          | YKL114C                 | APN1          |
| YOR043W                                          | WHI2          | YPR120C                 | CLB5          |

| Predictions at threshold level 0.75 continued... |               |                         |               |
|--------------------------------------------------|---------------|-------------------------|---------------|
| Gene1 of predicted pair                          |               | Gene2 of predicted pair |               |
| Systematic Name                                  | Standard Name | Systematic Name         | Standard Name |
| YBR217W                                          | ATG12         | YMR230W                 | RPS10B        |
| YER144C                                          | UBP5          | YOR327C                 | SNC2          |
| YLR094C                                          | GIS3          | YER040W                 | GLN3          |
| YOR195W                                          | SLK19         | YDL047W                 | SIT4          |
| YIL076W                                          | SEC28         | YGL003C                 | CDH1          |
| YOR270C                                          | VPH1          | YER162C                 | RAD4          |
| YDR245W                                          | MNN10         | YPL253C                 | VIK1          |
| YLR320W                                          | MMS22         | YOL121C                 | RPS19A        |
| YML115C                                          | VAN1          | YJL095W                 | BCK1          |
| YDR108W                                          | GSG1          | YGR188C                 | BUB1          |
| YOR096W                                          | RPS7A         | YDR378C                 | LSM6          |
| YMR199W                                          | CLN1          | YJL095W                 | BCK1          |
| YPL137C                                          | GIP3          | YOR327C                 | SNC2          |
| YLR234W                                          | TOP3          | YJR084W                 | CSN12         |
| YDR378C                                          | LSM6          | YKR020W                 | VPS51         |
| YBR173C                                          | UMP1          | YJR056C                 | YJR056C       |
| YFL023W                                          | BUD27         | YML001W                 | YPT7          |
| YBR173C                                          | UMP1          | YDL184C                 | RPL41A        |
| YMR142C                                          | RPL13B        | YLR441C                 | RPS1A         |
| YAL042W                                          | ERV46         | YPR119W                 | CLB2          |
| YDR456W                                          | NHX1          | YOR014W                 | RTS1          |
| YBR108W                                          | YBR108W       | YER122C                 | GLO3          |
| YPR036W                                          | VMA13         | YKR099W                 | BAS1          |
| YIL103W                                          | DPH1          | YLR182W                 | SWI6          |
| YDL116W                                          | NUP84         | YMR038C                 | CCS1          |
| YLR079W                                          | SIC1          | YOR008C                 | SLG1          |
| YGR209C                                          | TRX2          | YML028W                 | TSA1          |
| YMR070W                                          | MOT3          | YDL161W                 | ENT1          |
| YPL057C                                          | SUR1          | YEL013W                 | VAC8          |

| Predictions at threshold level 0.75 continued... |               |                         |               |
|--------------------------------------------------|---------------|-------------------------|---------------|
| Gene1 of predicted pair                          |               | Gene2 of predicted pair |               |
| Systematic Name                                  | Standard Name | Systematic Name         | Standard Name |
| YER161C                                          | SPT2          | YHR167W                 | THP2          |
| YOR109W                                          | INP53         | YEL043W                 | YEL043W       |
| YER001W                                          | MNN1          | YGL200C                 | EMP24         |
| YBL102W                                          | SFT2          | YPL195W                 | APL5          |
| YGL078C                                          | DBP3          | YER122C                 | GLO3          |
| YHR012W                                          | VPS29         | YPR046W                 | MCM16         |
| YGR097W                                          | ASK10         | YPL129W                 | TAF14         |
| YBL058W                                          | SHP1          | YOR327C                 | SNC2          |
| YNL309W                                          | STB1          | YMR052W                 | FAR3          |
| YNL069C                                          | RPL16B        | YER114C                 | BOI2          |
| YCR077C                                          | PAT1          | YNL107W                 | YAF9          |
| YHR200W                                          | RPN10         | YPR120C                 | CLB5          |
| YCR020C-A                                        | MAK31         | YJR040W                 | GEF1          |
| YOR358W                                          | HAP5          | YJR032W                 | CPR7          |
| YML038C                                          | YMD8          | YJL004C                 | SYS1          |
| YGR262C                                          | BUD32         | YML056C                 | IMD4          |
| YGL078C                                          | DBP3          | YDR358W                 | GGA1          |
| YKL048C                                          | ELM1          | YCR086W                 | CSM1          |
| YOR069W                                          | VPS5          | YNL051W                 | COG5          |
| YPR046W                                          | MCM16         | YML071C                 | COG8          |
| YBR030W                                          | YBR030W       | YCR053W                 | THR4          |
| YIL034C                                          | CAP2          | YLR360W                 | VPS38         |
| YBR173C                                          | UMP1          | YMR142C                 | RPL13B        |
| YJL176C                                          | SWI3          | YOR312C                 | RPL20B        |
| YDL059C                                          | RAD59         | YBL047C                 | EDE1          |
| YBR108W                                          | YBR108W       | YJL190C                 | RPS22A        |
| YJL124C                                          | LSM1          | YJR135C                 | MCM22         |
| YPL256C                                          | CLN2          | YGR059W                 | SPR3          |
| YNL016W                                          | PUB1          | YLR410W                 | VIP1          |



| Predictions at threshold level 0.75 continued... |               |                         |               |
|--------------------------------------------------|---------------|-------------------------|---------------|
| Gene1 of predicted pair                          |               | Gene2 of predicted pair |               |
| Systematic Name                                  | Standard Name | Systematic Name         | Standard Name |
| YGL095C                                          | VPS45         | YDL226C                 | GCS1          |
| YEL013W                                          | VAC8          | YLR182W                 | SWI6          |
| YBL008W                                          | HIR1          | YMR179W                 | SPT21         |
| YHR156C                                          | LIN1          | YOL121C                 | RPS19A        |
| YKL116C                                          | PRR1          | YCR053W                 | THR4          |
| YLR102C                                          | APC9          | YDR260C                 | SWM1          |
| YLR094C                                          | GIS3          | YER139C                 | YER139C       |
| YBL021C                                          | HAP3          | YHR187W                 | IKI1          |
| YLL039C                                          | UBI4          | YMR116C                 | ASC1          |
| YJL154C                                          | VPS35         | YKR030W                 | GMH1          |
| YGL066W                                          | SGF73         | YHR200W                 | RPN10         |
| YMR142C                                          | RPL13B        | YJL095W                 | BCK1          |
| YNL166C                                          | BNI5          | YJL095W                 | BCK1          |
| YNL041C                                          | COG6          | YAR014C                 | BUD14         |
| YPL137C                                          | GIP3          | YMR311C                 | GLC8          |
| YLR337C                                          | VRP1          | YGR133W                 | PEX4          |
| YGL115W                                          | SNF4          | YPL018W                 | CTF19         |
| YKL007W                                          | CAP1          | YCR077C                 | PAT1          |
| YHL031C                                          | GOS1          | YGL223C                 | COG1          |
| YLR386W                                          | VAC14         | YER144C                 | UBP5          |
| YDR245W                                          | MNN10         | YLR350W                 | ORM2          |
| YKL048C                                          | ELM1          | YNL238W                 | KEX2          |
| YLR119W                                          | SRN2          | YLR370C                 | ARC18         |
| YLR058C                                          | SHM2          | YML095C                 | RAD10         |
| YCL001W                                          | RER1          | YHR039C-A               | VMA10         |
| YGR184C                                          | UBR1          | YFR036W                 | CDC26         |
| YLR058C                                          | SHM2          | YDR254W                 | CHL4          |
| YHL030W                                          | ECM29         | YPR119W                 | CLB2          |
| YPL253C                                          | VIK1          | YNL199C                 | GCR2          |

| Predictions at threshold level 0.75 continued... |               |                         |               |
|--------------------------------------------------|---------------|-------------------------|---------------|
| Gene1 of predicted pair                          |               | Gene2 of predicted pair |               |
| Systematic Name                                  | Standard Name | Systematic Name         | Standard Name |
| YOL051W                                          | GAL11         | YBR289W                 | SNF5          |
| YOR112W                                          | CEX1          | YHL031C                 | GOS1          |
| YDR443C                                          | SSN2          | YGL033W                 | HOP2          |
| YLR381W                                          | CTF3          | YJR005W                 | APL1          |
| YJR032W                                          | CPR7          | YDR289C                 | RTT103        |
| YBL088C                                          | TEL1          | YDR253C                 | MET32         |
| YNL058C                                          | YNL058C       | YLR370C                 | ARC18         |
| YMR153W                                          | NUP53         | YBR171W                 | SEC66         |
| YGL213C                                          | SKI8          | YLR398C                 | SKI2          |
| YDR443C                                          | SSN2          | YMR026C                 | PEX12         |
| YBL051C                                          | PIN4          | YPR040W                 | TIP41         |
| YAL009W                                          | SPO7          | YMR165C                 | PAH1          |
| YLR360W                                          | VPS38         | YNL079C                 | TPM1          |
| YNL243W                                          | SLA2          | YDR245W                 | MNN10         |
| YLR386W                                          | VAC14         | YLR094C                 | GIS3          |
| YPL042C                                          | SSN3          | YPL106C                 | SSE1          |
| YMR004W                                          | MVP1          | YDR207C                 | UME6          |
| YPL057C                                          | SUR1          | YLR093C                 | NYV1          |
| YLR360W                                          | VPS38         | YER049W                 | TPA1          |
| YCR063W                                          | BUD31         | YJR050W                 | ISY1          |
| YDR477W                                          | SNF1          | YDL223C                 | HBT1          |
| YBR111W-A                                        | SUS1          | YHR167W                 | THP2          |
| YMR172W                                          | HOT1          | YBR114W                 | RAD16         |
| YMR202W                                          | ERG2          | YBR107C                 | IML3          |
| YLR234W                                          | TOP3          | YMR198W                 | CIK1          |
| YBL003C                                          | HTA2          | YGL241W                 | KAP114        |
| YDR137W                                          | RGP1          | YGR105W                 | VMA21         |
| YBR126C                                          | TPS1          | YGL033W                 | HOP2          |
| YPL057C                                          | SUR1          | YPR046W                 | MCM16         |

| Predictions at threshold level 0.75 continued... |               |                         |               |
|--------------------------------------------------|---------------|-------------------------|---------------|
| Gene1 of predicted pair                          |               | Gene2 of predicted pair |               |
| Systematic Name                                  | Standard Name | Systematic Name         | Standard Name |
| YMR109W                                          | MYO5          | YGR270W                 | YTA7          |
| YBL051C                                          | PIN4          | YMR109W                 | MYO5          |
| YMR055C                                          | BUB2          | YML028W                 | TSA1          |
| YBR112C                                          | CYC8          | YHL027W                 | RIM101        |
| YJL137C                                          | GLG2          | YLR273C                 | PIG1          |
| YMR273C                                          | ZDS1          | YGR059W                 | SPR3          |
| YPL115C                                          | BEM3          | YGL038C                 | OCH1          |
| YHL031C                                          | GOS1          | YEL053C                 | MAK10         |
| YDR108W                                          | GSG1          | YNR032W                 | PPG1          |
| YKL116C                                          | PRR1          | YJL183W                 | MNN11         |
| YDR225W                                          | HTA1          | YCL010C                 | SGF29         |
| YCL037C                                          | SRO9          | YER161C                 | SPT2          |
| YOL090W                                          | MSH2          | YMR038C                 | CCS1          |
| YDR254W                                          | CHL4          | YJL095W                 | BCK1          |
| YKR072C                                          | SIS2          | YBR036C                 | CSG2          |
| YOR195W                                          | SLK19         | YPL018W                 | CTF19         |
| YML112W                                          | CTK3          | YHR115C                 | DMA1          |
| YLR452C                                          | SST2          | YOR035C                 | SHE4          |
| YFL047W                                          | RGD2          | YGR059W                 | SPR3          |
| YGR239C                                          | PEX21         | YAR042W                 | SWH1          |
| YJL124C                                          | LSM1          | YMR038C                 | CCS1          |
| YPR084W                                          | YPR084W       | YHR012W                 | VPS29         |
| YDR363W-A                                        | SEM1          | YNL229C                 | URE2          |
| YBR107C                                          | IML3          | YDL013W                 | SLX5          |
| YGR105W                                          | VMA21         | YOL018C                 | TLG2          |
| YIL034C                                          | CAP2          | YHR114W                 | BZZ1          |
| YNR052C                                          | POP2          | YGL175C                 | SAE2          |
| YMR224C                                          | MRE11         | YGR184C                 | UBR1          |
| YMR116C                                          | ASC1          | YLR320W                 | MMS22         |

| Predictions at threshold level 0.75 continued... |               |                         |               |
|--------------------------------------------------|---------------|-------------------------|---------------|
| Gene1 of predicted pair                          |               | Gene2 of predicted pair |               |
| Systematic Name                                  | Standard Name | Systematic Name         | Standard Name |
| YER116C                                          | SLX8          | YBR280C                 | SAF1          |
| YHR156C                                          | LIN1          | YMR311C                 | GLC8          |
| YER019C-A                                        | SBH2          | YGL226C-A               | OST5          |
| YGR081C                                          | SLX9          | YOR368W                 | RAD17         |
| YDR004W                                          | RAD57         | YNL291C                 | MID1          |
| YCR086W                                          | CSM1          | YDR207C                 | UME6          |
| YKL126W                                          | YPK1          | YNL307C                 | MCK1          |
| YBL051C                                          | PIN4          | YHR115C                 | DMA1          |
| YIL034C                                          | CAP2          | YMR127C                 | SAS2          |
| YDR318W                                          | MCM21         | YOL054W                 | PSH1          |
| YDL116W                                          | NUP84         | YLR410W                 | VIP1          |
| YPR017C                                          | DSS4          | YGL054C                 | ERV14         |
| YPL024W                                          | RMI1          | YJR032W                 | CPR7          |
| YGR261C                                          | APL6          | YJL004C                 | SYS1          |
| YHR081W                                          | LRP1          | YJL183W                 | MNN11         |
| YPL050C                                          | MNN9          | YPR154W                 | PIN3          |
| YDR137W                                          | RGP1          | YGR270W                 | YTA7          |
| YNL215W                                          | IES2          | YER122C                 | GLO3          |
| YOR066W                                          | MSA1          | YDR310C                 | SUM1          |
| YBR107C                                          | IML3          | YOR358W                 | HAP5          |
| YIR005W                                          | IST3          | YHR115C                 | DMA1          |
| YLR192C                                          | HCR1          | YMR133W                 | REC114        |
| YNL054W                                          | VAC7          | YIR005W                 | IST3          |
| YOR290C                                          | SNF2          | YCR053W                 | THR4          |
| YML115C                                          | VAN1          | YGR188C                 | BUB1          |
| YBL017C                                          | PEP1          | YHR108W                 | GGA2          |
| YBR200W                                          | BEM1          | YPL195W                 | APL5          |
| YBR073W                                          | RDH54         | YDR254W                 | CHL4          |
| YHR013C                                          | ARD1          | YOL054W                 | PSH1          |

| Predictions at threshold level 0.75 continued... |               |                         |               |
|--------------------------------------------------|---------------|-------------------------|---------------|
| Gene1 of predicted pair                          |               | Gene2 of predicted pair |               |
| Systematic Name                                  | Standard Name | Systematic Name         | Standard Name |
| YKR035W-A                                        | DID2          | YOR327C                 | SNC2          |
| YBR131W                                          | CCZ1          | YMR038C                 | CCS1          |
| YNL087W                                          | TCB2          | YDL077C                 | VAM6          |
| YML001W                                          | YPT7          | YOL018C                 | TLG2          |
| YDL013W                                          | SLX5          | YJR135C                 | MCM22         |
| YBR171W                                          | SEC66         | YJL095W                 | BCK1          |
| YDR443C                                          | SSN2          | YAL024C                 | LTE1          |
| YNL058C                                          | YNL058C       | YGL003C                 | CDH1          |
| YHR060W                                          | VMA22         | YER122C                 | GLO3          |
| YDL116W                                          | NUP84         | YLR079W                 | SIC1          |
| YIL034C                                          | CAP2          | YDR144C                 | MKC7          |
| YNL218W                                          | MGS1          | YMR038C                 | CCS1          |
| YOR332W                                          | VMA4          | YPR119W                 | CLB2          |
| YPR051W                                          | MAK3          | YBR107C                 | IML3          |
| YJL172W                                          | CPS1          | YJL095W                 | BCK1          |
| YOR112W                                          | CEX1          | YNR032W                 | PPG1          |
| YJR031C                                          | GEA1          | YER122C                 | GLO3          |
| YOR327C                                          | SNC2          | YBR280C                 | SAF1          |
| YMR224C                                          | MRE11         | YML115C                 | VAN1          |
| YJL029C                                          | VPS53         | YDL047W                 | SIT4          |
| YGR108W                                          | CLB1          | YNL107W                 | YAF9          |
| YLR248W                                          | RCK2          | YPR119W                 | CLB2          |
| YGR249W                                          | MGA1          | YBR200W                 | BEM1          |
| YKR001C                                          | VPS1          | YJR033C                 | RAV1          |
| YLR371W                                          | ROM2          | YBR036C                 | CSG2          |
| YLR381W                                          | CTF3          | YPL253C                 | VIK1          |
| YPL057C                                          | SUR1          | YNL107W                 | YAF9          |
| YGL215W                                          | CLG1          | YDR358W                 | GGA1          |
| YMR198W                                          | CIK1          | YHR013C                 | ARD1          |

| Predictions at threshold level 0.75 continued... |               |                         |               |
|--------------------------------------------------|---------------|-------------------------|---------------|
| Gene1 of predicted pair                          |               | Gene2 of predicted pair |               |
| Systematic Name                                  | Standard Name | Systematic Name         | Standard Name |
| YML115C                                          | VAN1          | YJR056C                 | YJR056C       |
| YNL087W                                          | TCB2          | YPL037C                 | EGD1          |
| YOR275C                                          | RIM20         | YPL256C                 | CLN2          |
| YOR132W                                          | VPS17         | YML038C                 | YMD8          |
| YBR108W                                          | YBR108W       | YMR055C                 | BUB2          |
| YPL161C                                          | BEM4          | YLR182W                 | SWI6          |
| YOL126C                                          | MDH2          | YKL068W                 | NUP100        |
| YDR383C                                          | NKP1          | YGR188C                 | BUB1          |
| YGL147C                                          | RPL9A         | YMR095C                 | SNO1          |
| YKR072C                                          | SIS2          | YDL059C                 | RAD59         |
| YOR337W                                          | TEA1          | YER040W                 | GLN3          |
| YPL195W                                          | APL5          | YBR019C                 | GAL10         |
| YDR245W                                          | MNN10         | YCL037C                 | SRO9          |
| YPL161C                                          | BEM4          | YOR014W                 | RTS1          |
| YDR443C                                          | SSN2          | YEL060C                 | PRB1          |
| YHR156C                                          | LIN1          | YPR036W                 | VMA13         |
| YDL116W                                          | NUP84         | YMR080C                 | NAM7          |
| YDR254W                                          | CHL4          | YOR014W                 | RTS1          |
| YKL181W                                          | PRS1          | YHR030C                 | SLT2          |
| YMR179W                                          | SPT21         | YDL155W                 | CLB3          |
| YJL154C                                          | VPS35         | YDR207C                 | UME6          |
| YNL236W                                          | SIN4          | YPR119W                 | CLB2          |
| YOR106W                                          | VAM3          | YDR440W                 | DOT1          |
| YLR102C                                          | APC9          | YGR135W                 | PRE9          |
| YGR081C                                          | SLX9          | YDR207C                 | UME6          |
| YIL159W                                          | BNR1          | YHR081W                 | LRP1          |
| YER162C                                          | RAD4          | YOL018C                 | TLG2          |
| YPL129W                                          | TAF14         | YMR201C                 | RAD14         |
| YNR052C                                          | POP2          | YKL048C                 | ELM1          |

| Predictions at threshold level 0.75 continued... |               |                         |               |
|--------------------------------------------------|---------------|-------------------------|---------------|
| Gene1 of predicted pair                          |               | Gene2 of predicted pair |               |
| Systematic Name                                  | Standard Name | Systematic Name         | Standard Name |
| YBR194W                                          | SOY1          | YIR005W                 | IST3          |
| YHR134W                                          | WSS1          | YNR052C                 | POP2          |
| YPL001W                                          | HAT1          | YJL124C                 | LSM1          |
| YFR010W                                          | UBP6          | YJL124C                 | LSM1          |
| YBL047C                                          | EDE1          | YDL006W                 | PTC1          |
| YNL209W                                          | SSB2          | YPL240C                 | HSP82         |
| YNL106C                                          | INP52         | YLR254C                 | NDL1          |
| YDR378C                                          | LSM6          | YBL047C                 | EDE1          |
| YLR381W                                          | CTF3          | YLR254C                 | NDL1          |
| YDR477W                                          | SNF1          | YER040W                 | GLN3          |
| YJL127C                                          | SPT10         | YDR318W                 | MCM21         |
| YJL172W                                          | CPS1          | YMR133W                 | REC114        |
| YDR254W                                          | CHL4          | YJR005W                 | APL1          |
| YBR274W                                          | CHK1          | YCR077C                 | PAT1          |
| YAL024C                                          | LTE1          | YPL256C                 | CLN2          |
| YLR090W                                          | XDJ1          | YHR156C                 | LIN1          |
| YDR378C                                          | LSM6          | YER122C                 | GLO3          |
| YDR443C                                          | SSN2          | YMR133W                 | REC114        |
| YGL033W                                          | HOP2          | YPL057C                 | SUR1          |
| YNL218W                                          | MGS1          | YJL124C                 | LSM1          |
| YJL176C                                          | SWI3          | YJL095W                 | BCK1          |
| YJR056C                                          | YJR056C       | YOR327C                 | SNC2          |
| YGR072W                                          | UPF3          | YPL057C                 | SUR1          |
| YBL102W                                          | SFT2          | YJL053W                 | PEP8          |
| YLR320W                                          | MMS22         | YNL238W                 | KEX2          |
| YGL133W                                          | ITC1          | YDR264C                 | AKR1          |
| YER110C                                          | KAP123        | YML057W                 | CMP2          |
| YLR386W                                          | VAC14         | YMR311C                 | GLC8          |
| YMR153W                                          | NUP53         | YHR039C-A               | VMA10         |

| Predictions at threshold level 0.75 continued... |               |                         |               |
|--------------------------------------------------|---------------|-------------------------|---------------|
| Gene1 of predicted pair                          |               | Gene2 of predicted pair |               |
| Systematic Name                                  | Standard Name | Systematic Name         | Standard Name |
| YBR009C                                          | HHF1          | YKR048C                 | NAP1          |
| YKL007W                                          | CAP1          | YER114C                 | BOI2          |
| YDR156W                                          | RPA14         | YLR381W                 | CTF3          |
| YNL291C                                          | MID1          | YER122C                 | GLO3          |
| YDL155W                                          | CLB3          | YMR022W                 | UBC7          |
| YBL102W                                          | SFT2          | YHR060W                 | VMA22         |
| YJL172W                                          | CPS1          | YKR099W                 | BAS1          |
| YJR092W                                          | BUD4          | YPR122W                 | AXL1          |
| YEL065W                                          | SIT1          | YNR072W                 | HXT17         |
| YJL172W                                          | CPS1          | YBL025W                 | RRN10         |
| YOL054W                                          | PSH1          | YNL225C                 | CNM67         |
| YBR057C                                          | MUM2          | YEL044W                 | IES6          |
| YNL297C                                          | MON2          | YHR039C-A               | VMA10         |
| YGL147C                                          | RPL9A         | YBR019C                 | GAL10         |
| YEL009C                                          | GCN4          | YDR448W                 | ADA2          |
| YLR381W                                          | CTF3          | YHR012W                 | VPS29         |
| YGR261C                                          | APL6          | YLR093C                 | NYV1          |
| YER143W                                          | DDI1          | YPR032W                 | SRO7          |
| YOR270C                                          | VPH1          | YLR441C                 | RPS1A         |
| YNL044W                                          | YIP3          | YJL029C                 | VPS53         |
| YDR254W                                          | CHL4          | YLR315W                 | NKP2          |
| YGL115W                                          | SNF4          | YNR032W                 | PPG1          |
| YFR031C-A                                        | RPL2A         | YNL051W                 | COG5          |
| YKL116C                                          | PRR1          | YLR370C                 | ARC18         |
| YOR106W                                          | VAM3          | YDR202C                 | RAV2          |
| YGL200C                                          | EMP24         | YPL213W                 | LEA1          |
| YDL155W                                          | CLB3          | YOR141C                 | ARP8          |
| YNL106C                                          | INP52         | YPL079W                 | RPL21B        |
| YGL175C                                          | SAE2          | YJL187C                 | SWE1          |



| Predictions at threshold level 0.75 continued... |               |                         |               |
|--------------------------------------------------|---------------|-------------------------|---------------|
| Gene1 of predicted pair                          |               | Gene2 of predicted pair |               |
| Systematic Name                                  | Standard Name | Systematic Name         | Standard Name |
| YHL031C                                          | GOS1          | YKL213C                 | DOA1          |
| YDR443C                                          | SSN2          | YHR081W                 | LRP1          |
| YGR054W                                          | YGR054W       | YDL155W                 | CLB3          |
| YJL140W                                          | RPB4          | YOR064C                 | YNG1          |
| YDR309C                                          | GIC2          | YJL095W                 | BCK1          |
| YOR127W                                          | RGA1          | YPL018W                 | CTF19         |
| YDR439W                                          | LRS4          | YNL225C                 | CNM67         |
| YLR337C                                          | VRP1          | YML097C                 | VPS9          |
| YKL129C                                          | MYO3          | YHR061C                 | GIC1          |
| YDL184C                                          | RPL41A        | YKR035W-A               | DID2          |
| YDR176W                                          | NGG1          | YKR048C                 | NAP1          |
| YER116C                                          | SLX8          | YPR046W                 | MCM16         |
| YAL024C                                          | LTE1          | YEL056W                 | HAT2          |
| YIL053W                                          | RHR2          | YOR270C                 | VPH1          |
| YEL009C                                          | GCN4          | YOL148C                 | SPT20         |
| YAL024C                                          | LTE1          | YLR119W                 | SRN2          |
| YLR360W                                          | VPS38         | YDR477W                 | SNF1          |
| YMR202W                                          | ERG2          | YJR060W                 | CBF1          |
| YOR270C                                          | VPH1          | YEL027W                 | CUP5          |
| YMR224C                                          | MRE11         | YGL175C                 | SAE2          |
| YMR127C                                          | SAS2          | YJL095W                 | BCK1          |
| YKR001C                                          | VPS1          | YDL226C                 | GCS1          |
| YML115C                                          | VAN1          | YDL184C                 | RPL41A        |
| YDR335W                                          | MSN5          | YPL161C                 | BEM4          |
| YMR205C                                          | PFK2          | YBL101C                 | ECM21         |
| YHR039C-A                                        | VMA10         | YDR261C                 | EXG2          |
| YJL176C                                          | SWI3          | YNL329C                 | PEX6          |
| YFR010W                                          | UBP6          | YPL248C                 | GAL4          |
| YJR063W                                          | RPA12         | YBR009C                 | HHF1          |

| Predictions at threshold level 0.75 continued... |               |                         |               |
|--------------------------------------------------|---------------|-------------------------|---------------|
| Gene1 of predicted pair                          |               | Gene2 of predicted pair |               |
| Systematic Name                                  | Standard Name | Systematic Name         | Standard Name |
| YNL087W                                          | TCB2          | YER139C                 | YER139C       |
| YDL155W                                          | CLB3          | YNL079C                 | TPM1          |
| YGL147C                                          | RPL9A         | YNL032W                 | SIW14         |
| YLR386W                                          | VAC14         | YMR133W                 | REC114        |
| YLR447C                                          | VMA6          | YNL238W                 | KEX2          |
| YEL059C-A                                        | SOM1          | YMR035W                 | IMP2          |
| YDL020C                                          | RPN4          | YOR023C                 | AHC1          |
| YGL078C                                          | DBP3          | YPL057C                 | SUR1          |
| YLR079W                                          | SIC1          | YMR273C                 | ZDS1          |
| YDL013W                                          | SLX5          | YPL018W                 | CTF19         |
| YBR200W                                          | BEM1          | YKL032C                 | IXR1          |
| YML016C                                          | PPZ1          | YDL155W                 | CLB3          |
| YKL126W                                          | YPK1          | YLR093C                 | NYV1          |
| YBR171W                                          | SEC66         | YLR093C                 | NYV1          |
| YLR447C                                          | VMA6          | YDR144C                 | MKC7          |
| YDR245W                                          | MNN10         | YOR367W                 | SCP1          |
| YLR399C                                          | BDF1          | YNL116W                 | DMA2          |
| YDR245W                                          | MNN10         | YBL067C                 | UBP13         |
| YDR071C                                          | PAA1          | YER068W                 | MOT2          |
| YPL022W                                          | RAD1          | YJR090C                 | GRR1          |
| YDR174W                                          | HMO1          | YBR073W                 | RDH54         |
| YFR010W                                          | UBP6          | YMR167W                 | MLH1          |
| YJL060W                                          | BNA3          | YJR135C                 | MCM22         |
| YDL125C                                          | HNT1          | YDL047W                 | SIT4          |
| YDR363W-A                                        | SEM1          | YGR232W                 | NAS6          |
| YMR224C                                          | MRE11         | YGR275W                 | RTT102        |
| YMR216C                                          | SKY1          | YPL120W                 | VPS30         |
| YBL058W                                          | SHP1          | YPL195W                 | APL5          |
| YIL159W                                          | BNR1          | YLR093C                 | NYV1          |

| Predictions at threshold level 0.75 continued... |               |                         |               |
|--------------------------------------------------|---------------|-------------------------|---------------|
| Gene1 of predicted pair                          |               | Gene2 of predicted pair |               |
| Systematic Name                                  | Standard Name | Systematic Name         | Standard Name |
| YLR337C                                          | VRP1          | YGL212W                 | VAM7          |
| YHR200W                                          | RPN10         | YER162C                 | RAD4          |
| YKL048C                                          | ELM1          | YMR311C                 | GLC8          |
| YBR171W                                          | SEC66         | YMR214W                 | SCJ1          |
| YBL103C                                          | RTG3          | YFR036W                 | CDC26         |
| YKL160W                                          | ELF1          | YGR135W                 | PRE9          |
| YGL078C                                          | DBP3          | YGL033W                 | HOP2          |
| YKL025C                                          | PAN3          | YBR274W                 | CHK1          |
| YLR018C                                          | POM34         | YGL016W                 | KAP122        |
| YJR060W                                          | CBF1          | YPR046W                 | MCM16         |
| YER161C                                          | SPT2          | YLR315W                 | NKP2          |
| YOR132W                                          | VPS17         | YPR046W                 | MCM16         |
| YDL223C                                          | HBT1          | YFR036W                 | CDC26         |
| YMR095C                                          | SNO1          | YPR030W                 | CSR2          |
| YLR095C                                          | IOC2          | YMR142C                 | RPL13B        |
| YJL183W                                          | MNN11         | YER122C                 | GLO3          |
| YBR173C                                          | UMP1          | YDR335W                 | MSN5          |
| YIL076W                                          | SEC28         | YOR069W                 | VPS5          |
| YDR477W                                          | SNF1          | YBR108W                 | YBR108W       |
| YIL076W                                          | SEC28         | YLR309C                 | IMH1          |
| YPL152W                                          | RRD2          | YOL081W                 | IRA2          |
| YDR443C                                          | SSN2          | YLR093C                 | NYV1          |
| YLR441C                                          | RPS1A         | YGL003C                 | CDH1          |
| YNL058C                                          | YNL058C       | YML001W                 | YPT7          |
| YBR133C                                          | HSL7          | YJL187C                 | SWE1          |
| YLR192C                                          | HCR1          | YGL115W                 | SNF4          |
| YGR184C                                          | UBR1          | YJR135C                 | MCM22         |
| YLR337C                                          | VRP1          | YKL032C                 | IXR1          |
| YKR072C                                          | SIS2          | YBR278W                 | DPB3          |

| Predictions at threshold level 0.75 continued... |               |                         |               |
|--------------------------------------------------|---------------|-------------------------|---------------|
| Gene1 of predicted pair                          |               | Gene2 of predicted pair |               |
| Systematic Name                                  | Standard Name | Systematic Name         | Standard Name |
| YJL127C                                          | SPT10         | YDR335W                 | MSN5          |
| YOR038C                                          | HIR2          | YFR036W                 | CDC26         |
| YML016C                                          | PPZ1          | YIL103W                 | DPH1          |
| YNL041C                                          | COG6          | YMR311C                 | GLC8          |
| YOR083W                                          | WHI5          | YOR195W                 | SLK19         |
| YNL032W                                          | SIW14         | YER040W                 | GLN3          |
| YDR320C                                          | SWA2          | YNL238W                 | KEX2          |
| YNL229C                                          | URE2          | YJL095W                 | BCK1          |
| YKL116C                                          | PRR1          | YGL124C                 | MON1          |
| YNL264C                                          | PDR17         | YGL200C                 | EMP24         |
| YJR056C                                          | YJR056C       | YEL060C                 | PRB1          |
| YJL053W                                          | PEP8          | YHL020C                 | OPI1          |
| YLR206W                                          | ENT2          | YJR125C                 | ENT3          |
| YNL236W                                          | SIN4          | YGL094C                 | PAN2          |
| YOR270C                                          | VPH1          | YMR054W                 | STV1          |
| YNR052C                                          | POP2          | YNL248C                 | RPA49         |
| YPR051W                                          | MAK3          | YAL002W                 | VPS8          |
| YDL006W                                          | PTC1          | YDL077C                 | VAM6          |
| YBR128C                                          | ATG14         | YPL120W                 | VPS30         |
| YLR441C                                          | RPS1A         | YBR036C                 | CSG2          |
| YCR020C-A                                        | MAK31         | YPR051W                 | MAK3          |
| YDL232W                                          | OST4          | YIL162W                 | SUC2          |
| YML103C                                          | NUP188        | YBR200W                 | BEM1          |
| YPL161C                                          | BEM4          | YDL240W                 | LRG1          |
| YGL200C                                          | EMP24         | YLR425W                 | TUS1          |
| YPL050C                                          | MNN9          | YGL200C                 | EMP24         |
| YDR174W                                          | HMO1          | YHR111W                 | UBA4          |
| YEL043W                                          | YEL043W       | YAR014C                 | BUD14         |
| YPL161C                                          | BEM4          | YOR327C                 | SNC2          |

| Predictions at threshold level 0.75 continued... |               |                         |               |
|--------------------------------------------------|---------------|-------------------------|---------------|
| Gene1 of predicted pair                          |               | Gene2 of predicted pair |               |
| Systematic Name                                  | Standard Name | Systematic Name         | Standard Name |
| YBR173C                                          | UMP1          | YPL253C                 | VIK1          |
| YHR108W                                          | GGA2          | YHL011C                 | PRS3          |
| YLR337C                                          | VRP1          | YGL135W                 | RPL1B         |
| YKL139W                                          | CTK1          | YIR005W                 | IST3          |
| YHR012W                                          | VPS29         | YMR311C                 | GLC8          |
| YOR195W                                          | SLK19         | YLR410W                 | VIP1          |
| YDL160C                                          | DHH1          | YCR077C                 | PAT1          |
| YDR103W                                          | STE5          | YBR107C                 | IML3          |
| YBR173C                                          | UMP1          | YER116C                 | SLX8          |
| YBR274W                                          | CHK1          | YBR036C                 | CSG2          |
| YDL020C                                          | RPN4          | YER110C                 | KAP123        |
| YML062C                                          | MFT1          | YHR081W                 | LRP1          |
| YMR026C                                          | PEX12         | YDR261C                 | EXG2          |
| YOR195W                                          | SLK19         | YDR171W                 | HSP42         |
| YFR036W                                          | CDC26         | YLR182W                 | SWI6          |
| YPL018W                                          | CTF19         | YJR090C                 | GRR1          |
| YAL024C                                          | LTE1          | YNL106C                 | INP52         |
| YPL161C                                          | BEM4          | YJR060W                 | CBF1          |
| YMR194W                                          | RPL36A        | YGL246C                 | RAI1          |
| YPL096C-A                                        | ERI1          | YOR312C                 | RPL20B        |
| YMR026C                                          | PEX12         | YFR010W                 | UBP6          |
| YGL087C                                          | MMS2          | YDR183W                 | PLP1          |
| YLR441C                                          | RPS1A         | YKR035W-A               | DID2          |
| YMR109W                                          | MYO5          | YJL190C                 | RPS22A        |
| YMR224C                                          | MRE11         | YNL238W                 | KEX2          |
| YLR381W                                          | CTF3          | YOR014W                 | RTS1          |
| YCL001W                                          | RER1          | YJL004C                 | SYS1          |
| YDR080W                                          | VPS41         | YML001W                 | YPT7          |
| YBR107C                                          | IML3          | YML028W                 | TSA1          |

| Predictions at threshold level 0.75 continued... |               |                         |               |
|--------------------------------------------------|---------------|-------------------------|---------------|
| Gene1 of predicted pair                          |               | Gene2 of predicted pair |               |
| Systematic Name                                  | Standard Name | Systematic Name         | Standard Name |
| YGR019W                                          | UGA1          | YNL107W                 | YAF9          |
| YFL013C                                          | IES1          | YMR038C                 | CCS1          |
| YNL135C                                          | FPR1          | YNL023C                 | FAP1          |
| YKL117W                                          | SBA1          | YKL068W                 | NUP100        |
| YKR001C                                          | VPS1          | YDR289C                 | RTT103        |
| YFL033C                                          | RIM15         | YLR309C                 | IMH1          |
| YDL232W                                          | OST4          | YEL036C                 | ANP1          |
| YMR016C                                          | SOK2          | YDL083C                 | RPS16B        |
| YBR171W                                          | SEC66         | YGR270W                 | YTA7          |
| YPL018W                                          | CTF19         | YGL253W                 | HXK2          |
| YHR134W                                          | WSS1          | YHR077C                 | NMD2          |
| YDR108W                                          | GSG1          | YKR030W                 | GMH1          |
| YHR039C-A                                        | VMA10         | YOL108C                 | INO4          |
| YBR030W                                          | YBR030W       | YOL081W                 | IRA2          |
| YLR216C                                          | CPR6          | YKL117W                 | SBA1          |
| YLL039C                                          | UBI4          | YDL137W                 | ARF2          |
| YML115C                                          | VAN1          | YBR171W                 | SEC66         |
| YOR096W                                          | RPS7A         | YPL081W                 | RPS9A         |
| YDR137W                                          | RGP1          | YML001W                 | YPT7          |
| YDR176W                                          | NGG1          | YDR469W                 | SDC1          |
| YKL135C                                          | APL2          | YOR036W                 | PEP12         |
| YBR111W-A                                        | SUS1          | YOR001W                 | RRP6          |
| YBR126C                                          | TPS1          | YPL037C                 | EGD1          |
| YML038C                                          | YMD8          | YPL234C                 | TFP3          |
| YBR171W                                          | SEC66         | YKL161C                 | YKL161C       |
| YCR065W                                          | HCM1          | YOR308C                 | SNU66         |
| YHR012W                                          | VPS29         | YBR114W                 | RAD16         |
| YOR001W                                          | RRP6          | YOR141C                 | ARP8          |
| YBR290W                                          | BSD2          | YMR127C                 | SAS2          |

| Predictions at threshold level 0.75 continued... |               |                         |               |
|--------------------------------------------------|---------------|-------------------------|---------------|
| Gene1 of predicted pair                          |               | Gene2 of predicted pair |               |
| Systematic Name                                  | Standard Name | Systematic Name         | Standard Name |
| YIL036W                                          | CST6          | YIR005W                 | IST3          |
| YJR060W                                          | CBF1          | YJR033C                 | RAV1          |
| YGL223C                                          | COG1          | YAL002W                 | VPS8          |
| YJL176C                                          | SWI3          | YLR131C                 | ACE2          |
| YGL060W                                          | YBP2          | YPL018W                 | CTF19         |
| YER120W                                          | SCS2          | YNL051W                 | COG5          |
| YOR112W                                          | CEX1          | YHR039C-A               | VMA10         |
| YBR030W                                          | YBR030W       | YLR320W                 | MMS22         |
| YLR094C                                          | GIS3          | YLR370C                 | ARC18         |
| YLR079W                                          | SIC1          | YOR368W                 | RAD17         |
| YHR060W                                          | VMA22         | YLR309C                 | IMH1          |
| YGL066W                                          | SGF73         | YKR048C                 | NAP1          |
| YBR200W                                          | BEM1          | YOL121C                 | RPS19A        |
| YBR030W                                          | YBR030W       | YGL124C                 | MON1          |
| YBR030W                                          | YBR030W       | YOR270C                 | VPH1          |
| YDL116W                                          | NUP84         | YBL079W                 | NUP170        |
| YIL076W                                          | SEC28         | YER139C                 | YER139C       |
| YMR198W                                          | CIK1          | YER114C                 | BOI2          |
| YLR095C                                          | IOC2          | YMR230W                 | RPS10B        |
| YGL147C                                          | RPL9A         | YMR016C                 | SOK2          |
| YOR337W                                          | TEA1          | YOL081W                 | IRA2          |
| YOR127W                                          | RGA1          | YNL229C                 | URE2          |
| YDL116W                                          | NUP84         | YFL047W                 | RGD2          |
| YDR477W                                          | SNF1          | YLR371W                 | ROM2          |
| YLR452C                                          | SST2          | YDR261C                 | EXG2          |
| YLR386W                                          | VAC14         | YGL019W                 | CKB1          |
| YIL005W                                          | EPS1          | YPL106C                 | SSE1          |
| YHR134W                                          | WSS1          | YMR038C                 | CCS1          |
| YGR261C                                          | APL6          | YBL078C                 | ATG8          |

| Predictions at threshold level 0.75 continued... |               |                         |               |
|--------------------------------------------------|---------------|-------------------------|---------------|
| Gene1 of predicted pair                          |               | Gene2 of predicted pair |               |
| Systematic Name                                  | Standard Name | Systematic Name         | Standard Name |
| YDR195W                                          | REF2          | YER032W                 | FIR1          |
| YCR088W                                          | ABP1          | YDR323C                 | PEP7          |
| YBL058W                                          | SHP1          | YPL137C                 | GIP3          |
| YLR360W                                          | VPS38         | YGL223C                 | COG1          |
| YLR432W                                          | IMD3          | YML056C                 | IMD4          |
| YGL035C                                          | MIG1          | YPR119W                 | CLB2          |
| YGR108W                                          | CLB1          | YCR086W                 | CSM1          |
| YPL057C                                          | SUR1          | YPL037C                 | EGD1          |
| YMR198W                                          | CIK1          | YJL183W                 | MNN11         |
| YOR083W                                          | WHI5          | YDL226C                 | GCS1          |
| YDL020C                                          | RPN4          | YGR104C                 | SRB5          |
| YML062C                                          | MFT1          | YER063W                 | THO1          |
| YPL253C                                          | VIK1          | YNL307C                 | MCK1          |
| YLR192C                                          | HCR1          | YDL192W                 | ARF1          |
| YKL094W                                          | YJU3          | YKL140W                 | TGL1          |
| YMR055C                                          | BUB2          | YLR447C                 | VMA6          |
| YPL042C                                          | SSN3          | YDR477W                 | SNF1          |
| YPL037C                                          | EGD1          | YHL020C                 | OPI1          |
| YDL192W                                          | ARF1          | YNL076W                 | MKS1          |
| YLR192C                                          | HCR1          | YBL047C                 | EDE1          |
| YLR292C                                          | SEC72         | YKL048C                 | ELM1          |
| YLL026W                                          | HSP104        | YGR275W                 | RTT102        |
| YML071C                                          | COG8          | YOR327C                 | SNC2          |
| YJR058C                                          | APS2          | YPL259C                 | APM1          |
| YNL041C                                          | COG6          | YOL121C                 | RPS19A        |
| YDR080W                                          | VPS41         | YDL192W                 | ARF1          |
| YOR191W                                          | RIS1          | YGR071C                 | YGR071C       |
| YOL018C                                          | TLG2          | YAR014C                 | BUD14         |
| YBR195C                                          | MSI1          | YFR036W                 | CDC26         |



| Predictions at threshold level 0.75 continued... |               |                         |               |
|--------------------------------------------------|---------------|-------------------------|---------------|
| Gene1 of predicted pair                          |               | Gene2 of predicted pair |               |
| Systematic Name                                  | Standard Name | Systematic Name         | Standard Name |
| YBR057C                                          | MUM2          | YNL079C                 | TPM1          |
| YPL024W                                          | RMI1          | YDL059C                 | RAD59         |
| YMR127C                                          | SAS2          | YOR213C                 | SAS5          |
| YMR026C                                          | PEX12         | YJL183W                 | MNN11         |
| YKR072C                                          | SIS2          | YPR120C                 | CLB5          |
| YBL106C                                          | SRO77         | YOR327C                 | SNC2          |
| YAL010C                                          | MDM10         | YLR315W                 | NKP2          |
| YDR363W-A                                        | SEM1          | YDL047W                 | SIT4          |
| YCR065W                                          | HCM1          | YER096W                 | SHC1          |
| YGL066W                                          | SGF73         | YLR234W                 | TOP3          |
| YDR335W                                          | MSN5          | YKL048C                 | ELM1          |
| YDL116W                                          | NUP84         | YDR289C                 | RTT103        |
| YNL325C                                          | FIG4          | YER040W                 | GLN3          |
| YIL053W                                          | RHR2          | YIL159W                 | BNR1          |
| YIL148W                                          | RPL40A        | YPL178W                 | CBC2          |
| YER161C                                          | SPT2          | YLR182W                 | SWI6          |
| YBL103C                                          | RTG3          | YBR036C                 | CSG2          |
| YDR439W                                          | LRS4          | YKR061W                 | KTR2          |
| YDL006W                                          | PTC1          | YNR032W                 | PPG1          |
| YDL184C                                          | RPL41A        | YLR320W                 | MMS22         |
| YGR072W                                          | UPF3          | YHL031C                 | GOS1          |
| YML095C                                          | RAD10         | YHR115C                 | DMA1          |
| YLR452C                                          | SST2          | YPL018W                 | CTF19         |
| YMR153W                                          | NUP53         | YNL199C                 | GCR2          |
| YGL078C                                          | DBP3          | YOL081W                 | IRA2          |
| YNR052C                                          | POP2          | YOL081W                 | IRA2          |
| YDR101C                                          | ARX1          | YOR312C                 | RPL20B        |
| YJR059W                                          | PTK2          | YML057W                 | CMP2          |
| YLR386W                                          | VAC14         | YNL116W                 | DMA2          |

| Predictions at threshold level 0.75 continued... |               |                         |               |
|--------------------------------------------------|---------------|-------------------------|---------------|
| Gene1 of predicted pair                          |               | Gene2 of predicted pair |               |
| Systematic Name                                  | Standard Name | Systematic Name         | Standard Name |
| YOR275C                                          | RIM20         | YDL155W                 | CLB3          |
| YOL091W                                          | SPO21         | YDL226C                 | GCS1          |
| YNR052C                                          | POP2          | YPR046W                 | MCM16         |
| YLR386W                                          | VAC14         | YNL238W                 | KEX2          |
| YPL042C                                          | SSN3          | YLR079W                 | SIC1          |
| YPR046W                                          | MCM16         | YPL195W                 | APL5          |
| YDR378C                                          | LSM6          | YDL155W                 | CLB3          |
| YGL161C                                          | YIP5          | YPR119W                 | CLB2          |
| YBR017C                                          | KAP104        | YBL079W                 | NUP170        |
| YJL095W                                          | BCK1          | YGR188C                 | BUB1          |
| YGL237C                                          | HAP2          | YGL003C                 | CDH1          |
| YHR178W                                          | STB5          | YDR144C                 | MKC7          |
| YDR108W                                          | GSG1          | YDR469W                 | SDC1          |
| YLR192C                                          | HCR1          | YDR207C                 | UME6          |
| YDL020C                                          | RPN4          | YDR076W                 | RAD55         |
| YKL139W                                          | CTK1          | YNL236W                 | SIN4          |
| YPR036W                                          | VMA13         | YKL080W                 | VMA5          |
| YLR094C                                          | GIS3          | YML059C                 | NTE1          |
| YDR097C                                          | MSH6          | YOR368W                 | RAD17         |
| YBR107C                                          | IML3          | YDR289C                 | RTT103        |
| YLR093C                                          | NYV1          | YMR152W                 | YIM1          |
| YOR358W                                          | HAP5          | YDR254W                 | CHL4          |
| YNL229C                                          | URE2          | YHR115C                 | DMA1          |
| YML012W                                          | ERV25         | YNL041C                 | COG6          |
| YBR108W                                          | YBR108W       | YPR046W                 | MCM16         |
| YDR261C                                          | EXG2          | YMR152W                 | YIM1          |
| YIL159W                                          | BNR1          | YER162C                 | RAD4          |
| YDL047W                                          | SIT4          | YNL116W                 | DMA2          |
| YHR079C                                          | IRE1          | YOR036W                 | PEP12         |

| Predictions at threshold level 0.75 continued... |               |                         |               |
|--------------------------------------------------|---------------|-------------------------|---------------|
| Gene1 of predicted pair                          |               | Gene2 of predicted pair |               |
| Systematic Name                                  | Standard Name | Systematic Name         | Standard Name |
| YFL033C                                          | RIM15         | YNL238W                 | KEX2          |
| YML103C                                          | NUP188        | YLR386W                 | VAC14         |
| YDR108W                                          | GSG1          | YNL051W                 | COG5          |
| YOR358W                                          | HAP5          | YJL183W                 | MNN11         |
| YKR099W                                          | BAS1          | YFR036W                 | CDC26         |
| YMR224C                                          | MRE11         | YNL107W                 | YAF9          |
| YKL006W                                          | RPL14A        | YLR425W                 | TUS1          |
| YNL291C                                          | MID1          | YGR105W                 | VMA21         |
| YMR016C                                          | SOK2          | YNL307C                 | MCK1          |
| YNL201C                                          | PSY2          | YPL253C                 | VIK1          |
| YDL101C                                          | DUN1          | YMR224C                 | MRE11         |
| YJL176C                                          | SWI3          | YPL129W                 | TAF14         |
| YER044C                                          | ERG28         | YER139C                 | YER139C       |
| YGL078C                                          | DBP3          | YNL087W                 | TCB2          |
| YHR205W                                          | SCH9          | YER111C                 | SWI4          |
| YLR043C                                          | TRX1          | YML028W                 | TSA1          |
| YLR234W                                          | TOP3          | YCR086W                 | CSM1          |
| YDR004W                                          | RAD57         | YAL024C                 | LTE1          |
| YKL139W                                          | CTK1          | YJR032W                 | CPR7          |
| YFR010W                                          | UBP6          | YLR094C                 | GIS3          |
| YLR452C                                          | SST2          | YHR039C-A               | VMA10         |
| YJL187C                                          | SWE1          | YGL019W                 | CKB1          |
| YJL172W                                          | CPS1          | YER122C                 | GLO3          |
| YMR095C                                          | SNO1          | YLR398C                 | SKI2          |
| YML115C                                          | VAN1          | YDR484W                 | VPS52         |
| YJR060W                                          | CBF1          | YAL002W                 | VPS8          |
| YDR358W                                          | GGA1          | YGL124C                 | MON1          |
| YBL103C                                          | RTG3          | YOR327C                 | SNC2          |
| YLR441C                                          | RPS1A         | YER040W                 | GLN3          |

| Predictions at threshold level 0.75 continued... |               |                         |               |
|--------------------------------------------------|---------------|-------------------------|---------------|
| Gene1 of predicted pair                          |               | Gene2 of predicted pair |               |
| Systematic Name                                  | Standard Name | Systematic Name         | Standard Name |
| YNL069C                                          | RPL16B        | YJL053W                 | PEP8          |
| YFL023W                                          | BUD27         | YOL081W                 | IRA2          |
| YPL161C                                          | BEM4          | YML038C                 | YMD8          |
| YBR173C                                          | UMP1          | YLR180W                 | SAM1          |
| YDL184C                                          | RPL41A        | YDR137W                 | RGP1          |
| YNL058C                                          | YNL058C       | YLR093C                 | NYV1          |
| YGR261C                                          | APL6          | YOR069W                 | VPS5          |
| YMR224C                                          | MRE11         | YBL025W                 | RRN10         |
| YLR095C                                          | IOC2          | YNL325C                 | FIG4          |
| YBR217W                                          | ATG12         | YNR007C                 | ATG3          |
| YDR137W                                          | RGP1          | YGL003C                 | CDH1          |
| YGL115W                                          | SNF4          | YHR012W                 | VPS29         |
| YDR443C                                          | SSN2          | YOR140W                 | SFL1          |
| YIL053W                                          | RHR2          | YPR046W                 | MCM16         |
| YER116C                                          | SLX8          | YMR199W                 | CLN1          |
| YOR001W                                          | RRP6          | YBR010W                 | HHT1          |
| YMR142C                                          | RPL13B        | YPR046W                 | MCM16         |
| YHR081W                                          | LRP1          | YBR280C                 | SAF1          |
| YBR030W                                          | YBR030W       | YHR200W                 | RPN10         |
| YJL176C                                          | SWI3          | YLR370C                 | ARC18         |
| YJR056C                                          | YJR056C       | YJR084W                 | CSN12         |
| YNL025C                                          | SSN8          | YLR315W                 | NKP2          |
| YLR043C                                          | TRX1          | YPL195W                 | APL5          |
| YER059W                                          | PCL6          | YOR028C                 | CIN5          |
| YKL048C                                          | ELM1          | YMR152W                 | YIM1          |
| YKR001C                                          | VPS1          | YNL238W                 | KEX2          |
| YMR142C                                          | RPL13B        | YKL126W                 | YPK1          |
| YIL156W                                          | UBP7          | YMR199W                 | CLN1          |
| YPL057C                                          | SUR1          | YER139C                 | YER139C       |

| Predictions at threshold level 0.75 continued... |               |                         |               |
|--------------------------------------------------|---------------|-------------------------|---------------|
| Gene1 of predicted pair                          |               | Gene2 of predicted pair |               |
| Systematic Name                                  | Standard Name | Systematic Name         | Standard Name |
| YMR026C                                          | PEX12         | YDR358W                 | GGA1          |
| YMR205C                                          | PFK2          | YJL095W                 | BCK1          |
| YJL176C                                          | SWI3          | YLR192C                 | HCR1          |
| YMR224C                                          | MRE11         | YDR477W                 | SNF1          |
| YOR112W                                          | CEX1          | YDR080W                 | VPS41         |
| YML103C                                          | NUP188        | YNL248C                 | RPA49         |
| YDR318W                                          | MCM21         | YLR254C                 | NDL1          |
| YLR396C                                          | VPS33         | YDL226C                 | GCS1          |
| YPL057C                                          | SUR1          | YLR094C                 | GIS3          |
| YLR360W                                          | VPS38         | YLR309C                 | IMH1          |
| YDR202C                                          | RAV2          | YOR109W                 | INP53         |
| YKL139W                                          | CTK1          | YNL248C                 | RPA49         |
| YMR224C                                          | MRE11         | YMR026C                 | PEX12         |
| YML095C                                          | RAD10         | YPL018W                 | CTF19         |
| YDR335W                                          | MSN5          | YNL107W                 | YAF9          |
| YMR199W                                          | CLN1          | YBR260C                 | RGD1          |
| YNL218W                                          | MGS1          | YER116C                 | SLX8          |
| YML016C                                          | PPZ1          | YKL161C                 | YKL161C       |
| YEL022W                                          | GEA2          | YDL226C                 | GCS1          |
| YLR452C                                          | SST2          | YLR371W                 | ROM2          |
| YAL024C                                          | LTE1          | YKL116C                 | PRR1          |
| YML097C                                          | VPS9          | YAL002W                 | VPS8          |
| YNL025C                                          | SSN8          | YGR270W                 | YTA7          |
| YGR159C                                          | NSR1          | YDR245W                 | MNN10         |
| YJR056C                                          | YJR056C       | YLR371W                 | ROM2          |
| YKL101W                                          | HSL1          | YNL116W                 | DMA2          |
| YNL087W                                          | TCB2          | YPL057C                 | SUR1          |
| YMR109W                                          | MYO5          | YDR318W                 | MCM21         |
| YDR378C                                          | LSM6          | YLR315W                 | NKP2          |

| Predictions at threshold level 0.75 continued... |               |                         |               |
|--------------------------------------------------|---------------|-------------------------|---------------|
| Gene1 of predicted pair                          |               | Gene2 of predicted pair |               |
| Systematic Name                                  | Standard Name | Systematic Name         | Standard Name |
| YKL117W                                          | SBA1          | YMR125W                 | STO1          |
| YBL072C                                          | RPS8A         | YKL041W                 | VPS24         |
| YOR078W                                          | BUD21         | YHR203C                 | RPS4B         |
| YNL288W                                          | CAF40         | YHR114W                 | BZZ1          |
| YBR173C                                          | UMP1          | YMR152W                 | YIM1          |
| YNL068C                                          | FKH2          | YLR102C                 | APC9          |
| YBR173C                                          | UMP1          | YMR038C                 | CCS1          |
| YJR140C                                          | HIR3          | YMR038C                 | CCS1          |
| YIR005W                                          | IST3          | YOR308C                 | SNU66         |
| YHL031C                                          | GOS1          | YER122C                 | GLO3          |
| YDR129C                                          | SAC6          | YBL067C                 | UBP13         |
| YOR078W                                          | BUD21         | YGR100W                 | MDR1          |
| YLR090W                                          | XDJ1          | YLR094C                 | GIS3          |
| YHL020C                                          | OPI1          | YGR105W                 | VMA21         |
| YOR112W                                          | CEX1          | YEL051W                 | VMA8          |
| YBR200W                                          | BEM1          | YKR099W                 | BAS1          |
| YLR090W                                          | XDJ1          | YBR108W                 | YBR108W       |
| YLR079W                                          | SIC1          | YDR456W                 | NHX1          |
| YGL078C                                          | DBP3          | YLR094C                 | GIS3          |
| YNL325C                                          | FIG4          | YER139C                 | YER139C       |
| YDR264C                                          | AKR1          | YKL178C                 | STE3          |
| YPL024W                                          | RMI1          | YGR184C                 | UBR1          |
| YGL200C                                          | EMP24         | YCR077C                 | PAT1          |
| YKL139W                                          | CTK1          | YBR171W                 | SEC66         |
| YOR195W                                          | SLK19         | YKL110C                 | KTI12         |
| YDR293C                                          | SSD1          | YLR120C                 | YPS1          |
| YER116C                                          | SLX8          | YBR107C                 | IML3          |
| YNL215W                                          | IES2          | YOR308C                 | SNU66         |
| YNL214W                                          | PEX17         | YGR077C                 | PEX8          |

| Predictions at threshold level 0.75 continued... |               |                         |               |
|--------------------------------------------------|---------------|-------------------------|---------------|
| Gene1 of predicted pair                          |               | Gene2 of predicted pair |               |
| Systematic Name                                  | Standard Name | Systematic Name         | Standard Name |
| YDR293C                                          | SSD1          | YAR014C                 | BUD14         |
| YMR142C                                          | RPL13B        | YMR230W                 | RPS10B        |
| YBR041W                                          | FAT1          | YKR020W                 | VPS51         |
| YDR293C                                          | SSD1          | YGL223C                 | COG1          |
| YLR192C                                          | HCR1          | YBR200W                 | BEM1          |
| YLR095C                                          | IOC2          | YOL111C                 | MDY2          |
| YFR031C-A                                        | RPL2A         | YGR105W                 | VMA21         |
| YEL065W                                          | SIT1          | YPL024W                 | RMI1          |
| YJR056C                                          | YJR056C       | YER139C                 | YER139C       |
| YJR032W                                          | CPR7          | YPL018W                 | CTF19         |
| YBR009C                                          | HHF1          | YJL140W                 | RPB4          |
| YKL139W                                          | CTK1          | YER044C                 | ERG28         |
| YOR178C                                          | GAC1          | YLR258W                 | GSY2          |
| YDR097C                                          | MSH6          | YNL291C                 | MID1          |
| YEL015W                                          | EDC3          | YDR378C                 | LSM6          |
| YEL013W                                          | VAC8          | YGR262C                 | BUD32         |
| YGL133W                                          | ITC1          | YKR048C                 | NAP1          |
| YGR249W                                          | MGA1          | YHR039C-A               | VMA10         |
| YCR077C                                          | PAT1          | YGL031C                 | RPL24A        |
| YML016C                                          | PPZ1          | YJL138C                 | TIF2          |
| YCL037C                                          | SRO9          | YDR153C                 | ENT5          |
| YBL025W                                          | RRN10         | YDL192W                 | ARF1          |
| YNL307C                                          | MCK1          | YDL155W                 | CLB3          |
| YGL066W                                          | SGF73         | YDR507C                 | GIN4          |
| YLR386W                                          | VAC14         | YML016C                 | PPZ1          |
| YER161C                                          | SPT2          | YEL056W                 | HAT2          |
| YHR084W                                          | STE12         | YPL042C                 | SSN3          |
| YDL184C                                          | RPL41A        | YLR452C                 | SST2          |
| YHR161C                                          | YAP1801       | YOR036W                 | PEP12         |

| Predictions at threshold level 0.75 continued... |               |                         |               |
|--------------------------------------------------|---------------|-------------------------|---------------|
| Gene1 of predicted pair                          |               | Gene2 of predicted pair |               |
| Systematic Name                                  | Standard Name | Systematic Name         | Standard Name |
| YEL065W                                          | SIT1          | YIL159W                 | BNR1          |
| YDL020C                                          | RPN4          | YJR090C                 | GRR1          |
| YDL116W                                          | NUP84         | YDR318W                 | MCM21         |
| YLR435W                                          | TSR2          | YGL250W                 | RMR1          |
| YNL106C                                          | INP52         | YPL057C                 | SUR1          |
| YGR100W                                          | MDR1          | YJL029C                 | VPS53         |
| YOR109W                                          | INP53         | YHR012W                 | VPS29         |
| YNL106C                                          | INP52         | YLR410W                 | VIP1          |
| YGL124C                                          | MON1          | YBR280C                 | SAF1          |
| YFR031C-A                                        | RPL2A         | YDR207C                 | UME6          |
| YML100W                                          | TSL1          | YMR261C                 | TPS3          |
| YLR109W                                          | AHP1          | YHR111W                 | UBA4          |
| YCR020C-A                                        | MAK31         | YNL069C                 | RPL16B        |
| YEL009C                                          | GCN4          | YKL109W                 | HAP4          |
| YAL010C                                          | MDM10         | YHR111W                 | UBA4          |
| YBL003C                                          | HTA2          | YNL031C                 | HHT2          |
| YNL206C                                          | RTT106        | YBR084C-A               | RPL19A        |
| YPL234C                                          | TFP3          | YAL002W                 | VPS8          |
| YLR234W                                          | TOP3          | YLR150W                 | STM1          |
| YNL215W                                          | IES2          | YCR086W                 | CSM1          |
| YJL124C                                          | LSM1          | YGL003C                 | CDH1          |
| YMR199W                                          | CLN1          | YKL117W                 | SBA1          |
| YDR439W                                          | LRS4          | YNL107W                 | YAF9          |
| YNR072W                                          | HXT17         | YPR030W                 | CSR2          |
| YBR200W                                          | BEM1          | YLR410W                 | VIP1          |
| YPL024W                                          | RMI1          | YDR146C                 | SWI5          |
| YOR195W                                          | SLK19         | YML112W                 | CTK3          |
| YNL032W                                          | SIW14         | YEL060C                 | PRB1          |
| YOR375C                                          | GDH1          | YFR036W                 | CDC26         |



| Predictions at threshold level 0.75 continued... |               |                         |               |
|--------------------------------------------------|---------------|-------------------------|---------------|
| Gene1 of predicted pair                          |               | Gene2 of predicted pair |               |
| Systematic Name                                  | Standard Name | Systematic Name         | Standard Name |
| YFL023W                                          | BUD27         | YMR038C                 | CCS1          |
| YDR293C                                          | SSD1          | YDR318W                 | MCM21         |
| YGL066W                                          | SGF73         | YOL148C                 | SPT20         |
| YPR120C                                          | CLB5          | YHL011C                 | PRS3          |
| YGL025C                                          | PGD1          | YDR335W                 | MSN5          |
| YHR178W                                          | STB5          | YGR270W                 | YTA7          |
| YOL145C                                          | CTR9          | YOR106W                 | VAM3          |
| YDR254W                                          | CHL4          | YGR188C                 | BUB1          |
| YML001W                                          | YPT7          | YPL137C                 | GIP3          |
| YIL053W                                          | RHR2          | YLR398C                 | SKI2          |
| YLR381W                                          | CTF3          | YGL151W                 | NUT1          |
| YER116C                                          | SLX8          | YDR484W                 | VPS52         |
| YJL095W                                          | BCK1          | YMR311C                 | GLC8          |
| YML001W                                          | YPT7          | YGL198W                 | YIP4          |
| YJR140C                                          | HIR3          | YGL151W                 | NUT1          |
| YDR156W                                          | RPA14         | YLR315W                 | NKP2          |
| YBL025W                                          | RRN10         | YBR280C                 | SAF1          |
| YHR134W                                          | WSS1          | YBR107C                 | IML3          |
| YHR060W                                          | VMA22         | YER162C                 | RAD4          |
| YNL309W                                          | STB1          | YMR199W                 | CLN1          |
| YDR129C                                          | SAC6          | YKL048C                 | ELM1          |
| YLR102C                                          | APC9          | YBR084C-A               | RPL19A        |
| YNL199C                                          | GCR2          | YER139C                 | YER139C       |
| YNL307C                                          | MCK1          | YJR060W                 | CBF1          |
| YCR020W-B                                        | HTL1          | YHR056C                 | RSC30         |
| YLR090W                                          | XDJ1          | YPL137C                 | GIP3          |
| YBL102W                                          | SFT2          | YMR216C                 | SKY1          |
| YBL008W                                          | HIR1          | YOL081W                 | IRA2          |
| YGL033W                                          | HOP2          | YOL081W                 | IRA2          |

| Predictions at threshold level 0.75 continued... |               |                         |               |
|--------------------------------------------------|---------------|-------------------------|---------------|
| Gene1 of predicted pair                          |               | Gene2 of predicted pair |               |
| Systematic Name                                  | Standard Name | Systematic Name         | Standard Name |
| YGL058W                                          | RAD6          | YHR056C                 | RSC30         |
| YLR381W                                          | CTF3          | YKL101W                 | HSL1          |
| YDL020C                                          | RPN4          | YDR310C                 | SUM1          |
| YNL068C                                          | FKH2          | YKL048C                 | ELM1          |
| YMR224C                                          | MRE11         | YKR035W-A               | DID2          |
| YLR288C                                          | MEC3          | YEL056W                 | HAT2          |
| YKR014C                                          | YPT52         | YER074W-A               | YOS1          |
| YGR135W                                          | PRE9          | YNL107W                 | YAF9          |
| YBR036C                                          | CSG2          | YBR161W                 | CSH1          |
| YKL139W                                          | CTK1          | YLR432W                 | IMD3          |
| YBL078C                                          | ATG8          | YPL195W                 | APL5          |
| YIL159W                                          | BNR1          | YMR214W                 | SCJ1          |
| YJL172W                                          | CPS1          | YHR200W                 | RPN10         |
| YIL002C                                          | INP51         | YJL004C                 | SYS1          |
| YCL001W                                          | RER1          | YML067C                 | ERV41         |
| YBL102W                                          | SFT2          | YDR080W                 | VPS41         |
| YJR135C                                          | MCM22         | YOL067C                 | RTG1          |
| YMR026C                                          | PEX12         | YDR310C                 | SUM1          |
| YGR270W                                          | YTA7          | YOR038C                 | HIR2          |
| YOR080W                                          | DIA2          | YJR005W                 | APL1          |
| YGR105W                                          | VMA21         | YKL041W                 | VPS24         |
| YAL024C                                          | LTE1          | YLR192C                 | HCR1          |
| YGR108W                                          | CLB1          | YDR378C                 | LSM6          |
| YNL076W                                          | MKS1          | YLR180W                 | SAM1          |
| YDR004W                                          | RAD57         | YLR381W                 | CTF3          |
| YLR240W                                          | VPS34         | YOR106W                 | VAM3          |
| YMR026C                                          | PEX12         | YDL184C                 | RPL41A        |
| YNL032W                                          | SIW14         | YJL183W                 | MNN11         |
| YOR080W                                          | DIA2          | YJL058C                 | BIT61         |

| Predictions at threshold level 0.75 continued... |               |                         |               |
|--------------------------------------------------|---------------|-------------------------|---------------|
| Gene1 of predicted pair                          |               | Gene2 of predicted pair |               |
| Systematic Name                                  | Standard Name | Systematic Name         | Standard Name |
| YMR311C                                          | GLC8          | YLR180W                 | SAM1          |
| YGR072W                                          | UPF3          | YLR360W                 | VPS38         |
| YDR253C                                          | MET32         | YML095C                 | RAD10         |
| YMR142C                                          | RPL13B        | YOR066W                 | MSA1          |
| YNL243W                                          | SLA2          | YOR109W                 | INP53         |
| YIL053W                                          | RHR2          | YER144C                 | UBP5          |
| YDR080W                                          | VPS41         | YPL161C                 | BEM4          |
| YNL215W                                          | IES2          | YJL006C                 | CTK2          |
| YHL011C                                          | PRS3          | YLR425W                 | TUS1          |
| YIL159W                                          | BNR1          | YPR030W                 | CSR2          |
| YLR386W                                          | VAC14         | YKR057W                 | RPS21A        |
| YJL136C                                          | RPS21B        | YIL008W                 | URM1          |
| YPR084W                                          | YPR084W       | YNL238W                 | KEX2          |
| YMR095C                                          | SNO1          | YBR217W                 | ATG12         |
| YBR290W                                          | BSD2          | YML103C                 | NUP188        |
| YDR448W                                          | ADA2          | YOR039W                 | CKB2          |
| YGR249W                                          | MGA1          | YNR072W                 | HXT17         |
| YOR112W                                          | CEX1          | YMR054W                 | STV1          |
| YPL037C                                          | EGD1          | YCL001W                 | RER1          |
| YOR132W                                          | VPS17         | YHL020C                 | OPI1          |
| YLR216C                                          | CPR6          | YLR381W                 | CTF3          |
| YLR234W                                          | TOP3          | YKR095W                 | MLP1          |
| YDR293C                                          | SSD1          | YGR020C                 | VMA7          |
| YGR019W                                          | UGA1          | YLR447C                 | VMA6          |
| YLR371W                                          | ROM2          | YLR180W                 | SAM1          |
| YNL291C                                          | MID1          | YOR132W                 | VPS17         |
| YPL018W                                          | CTF19         | YHL002W                 | HSE1          |
| YGR104C                                          | SRB5          | YBR215W                 | HPC2          |
| YBL102W                                          | SFT2          | YHL020C                 | OPI1          |

| Predictions at threshold level 0.75 continued... |               |                         |               |
|--------------------------------------------------|---------------|-------------------------|---------------|
| Gene1 of predicted pair                          |               | Gene2 of predicted pair |               |
| Systematic Name                                  | Standard Name | Systematic Name         | Standard Name |
| YMR026C                                          | PEX12         | YLR371W                 | ROM2          |
| YMR016C                                          | SOK2          | YDL077C                 | VAM6          |
| YLR441C                                          | RPS1A         | YMR311C                 | GLC8          |
| YLR216C                                          | CPR6          | YBR107C                 | IML3          |
| YML095C                                          | RAD10         | YGL175C                 | SAE2          |
| YLR119W                                          | SRN2          | YNL325C                 | FIG4          |
| YNL106C                                          | INP52         | YCR077C                 | PAT1          |
| YBR131W                                          | CCZ1          | YKR001C                 | VPS1          |
| YMR231W                                          | PEP5          | YML028W                 | TSA1          |
| YCL010C                                          | SGF29         | YBR111W-A               | SUS1          |
| YKR072C                                          | SIS2          | YOL090W                 | MSH2          |
| YHR052W                                          | CIC1          | YOL041C                 | NOP12         |
| YDL077C                                          | VAM6          | YGL198W                 | YIP4          |
| YCR081W                                          | SRB8          | YER068W                 | MOT2          |
| YIL076W                                          | SEC28         | YHL020C                 | OPI1          |
| YDR202C                                          | RAV2          | YMR216C                 | SKY1          |
| YNL288W                                          | CAF40         | YBR200W                 | BEM1          |
| YKL048C                                          | ELM1          | YOL081W                 | IRA2          |
| YBR194W                                          | SOY1          | YDR137W                 | RGP1          |
| YFR010W                                          | UBP6          | YMR038C                 | CCS1          |
| YMR127C                                          | SAS2          | YOR038C                 | HIR2          |
| YLL007C                                          | YLL007C       | YNL166C                 | BNI5          |
| YLR381W                                          | CTF3          | YDR289C                 | RTT103        |
| YDR174W                                          | HMO1          | YKL139W                 | CTK1          |
| YLR079W                                          | SIC1          | YOR358W                 | HAP5          |
| YOR038C                                          | HIR2          | YGL151W                 | NUT1          |
| YDL185W                                          | TFP1          | YDR318W                 | MCM21         |
| YPL253C                                          | VIK1          | YDR076W                 | RAD55         |
| YEL065W                                          | SIT1          | YHR200W                 | RPN10         |

| Predictions at threshold level 0.75 continued... |               |                         |               |
|--------------------------------------------------|---------------|-------------------------|---------------|
| Gene1 of predicted pair                          |               | Gene2 of predicted pair |               |
| Systematic Name                                  | Standard Name | Systematic Name         | Standard Name |
| YJL060W                                          | BNA3          | YNL107W                 | YAF9          |
| YGL223C                                          | COG1          | YML012W                 | ERV25         |
| YFR010W                                          | UBP6          | YNL107W                 | YAF9          |
| YBL047C                                          | EDE1          | YOR312C                 | RPL20B        |
| YMR039C                                          | SUB1          | YGL151W                 | NUT1          |
| YOR332W                                          | VMA4          | YKL041W                 | VPS24         |
| YPL161C                                          | BEM4          | YNL127W                 | FAR11         |
| YML115C                                          | VAN1          | YOR312C                 | RPL20B        |
| YKR057W                                          | RPS21A        | YHR200W                 | RPN10         |
| YGL033W                                          | HOP2          | YDR261C                 | EXG2          |
| YDL223C                                          | HBT1          | YOL111C                 | MDY2          |
| YKL007W                                          | CAP1          | YDR309C                 | GIC2          |
| YBR200W                                          | BEM1          | YJL095W                 | BCK1          |
| YML103C                                          | NUP188        | YNL054W                 | VAC7          |
| YDR137W                                          | RGP1          | YDR469W                 | SDC1          |
| YNL291C                                          | MID1          | YNL127W                 | FAR11         |
| YDR192C                                          | NUP42         | YDR101C                 | ARX1          |
| YPL024W                                          | RMI1          | YHR077C                 | NMD2          |
| YFR031C-A                                        | RPL2A         | YOR109W                 | INP53         |
| YLR192C                                          | HCR1          | YNL032W                 | SIW14         |
| YNL069C                                          | RPL16B        | YMR216C                 | SKY1          |
| YDR320C                                          | SWA2          | YBL017C                 | PEP1          |
| YOL145C                                          | CTR9          | YBR010W                 | HHT1          |
| YIL076W                                          | SEC28         | YDR358W                 | GGA1          |
| YBR131W                                          | CCZ1          | YJL117W                 | PHO86         |
| YDR080W                                          | VPS41         | YKR020W                 | VPS51         |
| YAL024C                                          | LTE1          | YGL161C                 | YIP5          |
| YDR378C                                          | LSM6          | YGR188C                 | BUB1          |
| YLR192C                                          | HCR1          | YNL325C                 | FIG4          |

| Predictions at threshold level 0.75 continued... |               |                         |               |
|--------------------------------------------------|---------------|-------------------------|---------------|
| Gene1 of predicted pair                          |               | Gene2 of predicted pair |               |
| Systematic Name                                  | Standard Name | Systematic Name         | Standard Name |
| YNL325C                                          | FIG4          | YBL103C                 | RTG3          |
| YMR224C                                          | MRE11         | YOR195W                 | SLK19         |
| YBR108W                                          | YBR108W       | YPL137C                 | GIP3          |
| YGR040W                                          | KSS1          | YHR084W                 | STE12         |
| YGL115W                                          | SNF4          | YPR030W                 | CSR2          |
| YNL206C                                          | RTT106        | YPR119W                 | CLB2          |
| YEL051W                                          | VMA8          | YOL018C                 | TLG2          |
| YNL041C                                          | COG6          | YER122C                 | GLO3          |
| YER116C                                          | SLX8          | YJR084W                 | CSN12         |
| YDR379W                                          | RGA2          | YKL032C                 | IXR1          |
| YBL058W                                          | SHP1          | YLR306W                 | UBC12         |
| YCR024C-A                                        | PMP1          | YKL117W                 | SBA1          |
| YDR320C                                          | SWA2          | YMR216C                 | SKY1          |
| YOR332W                                          | VMA4          | YHR039C-A               | VMA10         |
| YJL053W                                          | PEP8          | YDR108W                 | GSG1          |
| YKL025C                                          | PAN3          | YHR114W                 | BZZ1          |
| YOR033C                                          | EXO1          | YNL082W                 | PMS1          |
| YBR200W                                          | BEM1          | YBR107C                 | IML3          |
| YMR016C                                          | SOK2          | YKR035W-A               | DID2          |
| YGR108W                                          | CLB1          | YDR318W                 | MCM21         |
| YER122C                                          | GLO3          | YAL002W                 | VPS8          |
| YFR010W                                          | UBP6          | YJR060W                 | CBF1          |
| YOR141C                                          | ARP8          | YDL226C                 | GCS1          |
| YPR120C                                          | CLB5          | YKL101W                 | HSL1          |
| YJR106W                                          | ECM27         | YFL044C                 | OTU1          |
| YIL076W                                          | SEC28         | YJR140C                 | HIR3          |
| YBR131W                                          | CCZ1          | YNL041C                 | COG6          |
| YLR441C                                          | RPS1A         | YKR099W                 | BAS1          |
| YHR134W                                          | WSS1          | YHR012W                 | VPS29         |

| Predictions at threshold level 0.75 continued... |               |                         |               |
|--------------------------------------------------|---------------|-------------------------|---------------|
| Gene1 of predicted pair                          |               | Gene2 of predicted pair |               |
| Systematic Name                                  | Standard Name | Systematic Name         | Standard Name |
| YOR156C                                          | NFI1          | YDR155C                 | CPR1          |
| YHR160C                                          | PEX18         | YDL065C                 | PEX19         |
| YPL106C                                          | SSE1          | YPR046W                 | MCM16         |
| YMR198W                                          | CIK1          | YBR082C                 | UBC4          |
| YNL127W                                          | FAR11         | YER122C                 | GLO3          |
| YFR032C-A                                        | RPL29         | YDL006W                 | PTC1          |
| YOR096W                                          | RPS7A         | YER102W                 | RPS8B         |
| YOR083W                                          | WHI5          | YDR335W                 | MSN5          |
| YNL032W                                          | SIW14         | YML001W                 | YPT7          |
| YPL129W                                          | TAF14         | YMR109W                 | MYO5          |
| YPL024W                                          | RMI1          | YDR318W                 | MCM21         |
| YGL135W                                          | RPL1B         | YBR181C                 | RPS6B         |
| YPL024W                                          | RMI1          | YHR200W                 | RPN10         |
| YBR195C                                          | MSI1          | YCR077C                 | PAT1          |
| YMR026C                                          | PEX12         | YPL137C                 | GIP3          |
| YLR337C                                          | VRP1          | YBL051C                 | PIN4          |
| YJL136C                                          | RPS21B        | YGL163C                 | RAD54         |
| YBL102W                                          | SFT2          | YOR127W                 | RGA1          |
| YML115C                                          | VAN1          | YER162C                 | RAD4          |
| YML103C                                          | NUP188        | YFR030W                 | MET10         |
| YNL166C                                          | BNI5          | YDR289C                 | RTT103        |
| YLR058C                                          | SHM2          | YNL236W                 | SIN4          |
| YJL128C                                          | PBS2          | YER118C                 | SHO1          |
| YLR337C                                          | VRP1          | YBR057C                 | MUM2          |
| YER122C                                          | GLO3          | YLR182W                 | SWI6          |
| YGR072W                                          | UPF3          | YML071C                 | COG8          |
| YDR443C                                          | SSN2          | YNL058C                 | YNL058C       |
| YOR083W                                          | WHI5          | YGL003C                 | CDH1          |
| YKR072C                                          | SIS2          | YJR140C                 | HIR3          |

| Predictions at threshold level 0.75 continued... |               |                         |               |
|--------------------------------------------------|---------------|-------------------------|---------------|
| Gene1 of predicted pair                          |               | Gene2 of predicted pair |               |
| Systematic Name                                  | Standard Name | Systematic Name         | Standard Name |
| YBR041W                                          | FAT1          | YDL006W                 | PTC1          |
| YFR031C-A                                        | RPL2A         | YOL081W                 | IRA2          |
| YDR289C                                          | RTT103        | YOR308C                 | SNU66         |
| YJL172W                                          | CPS1          | YOL111C                 | MDY2          |
| YHR152W                                          | SPO12         | YNL229C                 | URE2          |
| YDL116W                                          | NUP84         | YER110C                 | KAP123        |
| YAL024C                                          | LTE1          | YLR182W                 | SWI6          |
| YPR120C                                          | CLB5          | YJR060W                 | CBF1          |
| YMR231W                                          | PEP5          | YDR076W                 | RAD55         |
| YPL050C                                          | MNN9          | YMR089C                 | YTA12         |
| YNL253W                                          | TEX1          | YNL004W                 | HRB1          |
| YFR032C-A                                        | RPL29         | YGR217W                 | CCH1          |
| YMR055C                                          | BUB2          | YPL106C                 | SSE1          |
| YGL003C                                          | CDH1          | YJR035W                 | RAD26         |
| YML001W                                          | YPT7          | YAL002W                 | VPS8          |
| YDR225W                                          | HTA1          | YLR032W                 | RAD5          |
| YCR020C-A                                        | MAK31         | YJL004C                 | SYS1          |
| YLR371W                                          | ROM2          | YMR038C                 | CCS1          |
| YDR137W                                          | RGP1          | YHR081W                 | LRP1          |
| YLR337C                                          | VRP1          | YPL213W                 | LEA1          |
| YCR086W                                          | CSM1          | YGL253W                 | HXK2          |
| YOL030W                                          | GAS5          | YJL187C                 | SWE1          |
| YMR231W                                          | PEP5          | YGL198W                 | YIP4          |
| YDR101C                                          | ARX1          | YOL041C                 | NOP12         |
| YJL176C                                          | SWI3          | YBL101C                 | ECM21         |
| YNL238W                                          | KEX2          | YCR053W                 | THR4          |
| YER107C                                          | GLE2          | YLR055C                 | SPT8          |
| YEL050C                                          | RML2          | YDL226C                 | GCS1          |
| YBR200W                                          | BEM1          | YDR264C                 | AKR1          |



| Predictions at threshold level 0.75 continued... |               |                         |               |
|--------------------------------------------------|---------------|-------------------------|---------------|
| Gene1 of predicted pair                          |               | Gene2 of predicted pair |               |
| Systematic Name                                  | Standard Name | Systematic Name         | Standard Name |
| YJR135C                                          | MCM22         | YGL252C                 | RTG2          |
| YML071C                                          | COG8          | YBR036C                 | CSG2          |
| YLR090W                                          | XDJ1          | YOL111C                 | MDY2          |
| YGR020C                                          | VMA7          | YGL054C                 | ERV14         |
| YJL210W                                          | PEX2          | YDL065C                 | PEX19         |
| YNL238W                                          | KEX2          | YLR398C                 | SKI2          |
| YNL041C                                          | COG6          | YNR032W                 | PPG1          |
| YLR135W                                          | SLX4          | YOL090W                 | MSH2          |
| YOL054W                                          | PSH1          | YOL081W                 | IRA2          |
| YCR053W                                          | THR4          | YDR207C                 | UME6          |
| YMR255W                                          | GFD1          | YBR017C                 | KAP104        |
| YKL048C                                          | ELM1          | YOL111C                 | MDY2          |
| YPR017C                                          | DSS4          | YNR032W                 | PPG1          |
| YOR275C                                          | RIM20         | YIL008W                 | URM1          |
| YPL037C                                          | EGD1          | YDR153C                 | ENT5          |
| YFR030W                                          | MET10         | YDR183W                 | PLP1          |
| YFR031C-A                                        | RPL2A         | YBR171W                 | SEC66         |
| YLR131C                                          | ACE2          | YKL041W                 | VPS24         |
| YCL037C                                          | SRO9          | YOL045W                 | PSK2          |
| YLR441C                                          | RPS1A         | YHR039C-A               | VMA10         |
| YFL023W                                          | BUD27         | YGL175C                 | SAE2          |
| YIL159W                                          | BNR1          | YMR152W                 | YIM1          |
| YPL161C                                          | BEM4          | YLR370C                 | ARC18         |
| YLR360W                                          | VPS38         | YNR032W                 | PPG1          |
| YDR496C                                          | PUF6          | YKL185W                 | ASH1          |
| YJL154C                                          | VPS35         | YJL036W                 | SNX4          |
| YLR079W                                          | SIC1          | YDR289C                 | RTT103        |
| YNL325C                                          | FIG4          | YJR056C                 | YJR056C       |
| YLR148W                                          | PEP3          | YLR043C                 | TRX1          |

| Predictions at threshold level 0.75 continued... |               |                         |               |
|--------------------------------------------------|---------------|-------------------------|---------------|
| Gene1 of predicted pair                          |               | Gene2 of predicted pair |               |
| Systematic Name                                  | Standard Name | Systematic Name         | Standard Name |
| YMR216C                                          | SKY1          | YJR040W                 | GEF1          |
| YLR095C                                          | IOC2          | YHR039C-A               | VMA10         |
| YOR270C                                          | VPH1          | YNL058C                 | YNL058C       |
| YER162C                                          | RAD4          | YOR035C                 | SHE4          |
| YBL027W                                          | RPL19B        | YER096W                 | SHC1          |
| YBR200W                                          | BEM1          | YDR207C                 | UME6          |
| YBR194W                                          | SOY1          | YML028W                 | TSA1          |
| YNR052C                                          | POP2          | YNL016W                 | PUB1          |
| YDR225W                                          | HTA1          | YPL057C                 | SUR1          |
| YKR020W                                          | VPS51         | YDR323C                 | PEP7          |
| YOR038C                                          | HIR2          | YDR310C                 | SUM1          |
| YNL288W                                          | CAF40         | YBR171W                 | SEC66         |
| YOR043W                                          | WHI2          | YEL060C                 | PRB1          |
| YBR200W                                          | BEM1          | YOL081W                 | IRA2          |
| YDL223C                                          | HBT1          | YHR200W                 | RPN10         |
| YPR030W                                          | CSR2          | YER040W                 | GLN3          |
| YLR447C                                          | VMA6          | YGL124C                 | MON1          |
| YHR156C                                          | LIN1          | YML071C                 | COG8          |
| YLR441C                                          | RPS1A         | YNR072W                 | HXT17         |
| YJL151C                                          | SNA3          | YGR268C                 | HUA1          |
| YPL105C                                          | YPL105C       | YDL006W                 | PTC1          |
| YJL058C                                          | BIT61         | YNL229C                 | URE2          |
| YLR370C                                          | ARC18         | YJR035W                 | RAD26         |
| YPL115C                                          | BEM3          | YMR172W                 | HOT1          |
| YHR012W                                          | VPS29         | YDR153C                 | ENT5          |
| YDL002C                                          | NHP10         | YDR440W                 | DOT1          |
| YDR137W                                          | RGP1          | YNL041C                 | COG6          |
| YER161C                                          | SPT2          | YER139C                 | YER139C       |
| YBR171W                                          | SEC66         | YHR012W                 | VPS29         |

| Predictions at threshold level 0.75 continued... |               |                         |               |
|--------------------------------------------------|---------------|-------------------------|---------------|
| Gene1 of predicted pair                          |               | Gene2 of predicted pair |               |
| Systematic Name                                  | Standard Name | Systematic Name         | Standard Name |
| YER116C                                          | SLX8          | YNL058C                 | YNL058C       |
| YDL005C                                          | MED2          | YNL079C                 | TPM1          |
| YDR335W                                          | MSN5          | YHR167W                 | THP2          |
| YDR142C                                          | PEX7          | YNL214W                 | PEX17         |
| YMR016C                                          | SOK2          | YOR327C                 | SNC2          |
| YNL314W                                          | DAL82         | YIR023W                 | DAL81         |
| YBL008W                                          | HIR1          | YGL148W                 | ARO2          |
| YLR386W                                          | VAC14         | YKL032C                 | IXR1          |
| YOR001W                                          | RRP6          | YDR378C                 | LSM6          |
| YKR020W                                          | VPS51         | YDL192W                 | ARF1          |
| YGL135W                                          | RPL1B         | YML097C                 | VPS9          |
| YBR126C                                          | TPS1          | YHR156C                 | LIN1          |
| YPR084W                                          | YPR084W       | YML001W                 | YPT7          |
| YOR275C                                          | RIM20         | YBR283C                 | SSH1          |
| YER110C                                          | KAP123        | YJR135C                 | MCM22         |
| YKL160W                                          | ELF1          | YOR308C                 | SNU66         |
| YHR178W                                          | STB5          | YGR188C                 | BUB1          |
| YDR156W                                          | RPA14         | YLR079W                 | SIC1          |
| YAL020C                                          | ATS1          | YBL051C                 | PIN4          |
| YLR381W                                          | CTF3          | YFR030W                 | MET10         |
| YEL065W                                          | SIT1          | YHR013C                 | ARD1          |
| YIL053W                                          | RHR2          | YDR358W                 | GGA1          |
| YMR026C                                          | PEX12         | YDL192W                 | ARF1          |
| YAL024C                                          | LTE1          | YLR180W                 | SAM1          |
| YMR224C                                          | MRE11         | YJL095W                 | BCK1          |
| YNL243W                                          | SLA2          | YBR200W                 | BEM1          |
| YLR337C                                          | VRP1          | YPL253C                 | VIK1          |
| YMR080C                                          | NAM7          | YLR135W                 | SLX4          |
| YDR261C                                          | EXG2          | YER139C                 | YER139C       |

| Predictions at threshold level 0.75 continued... |               |                         |               |
|--------------------------------------------------|---------------|-------------------------|---------------|
| Gene1 of predicted pair                          |               | Gene2 of predicted pair |               |
| Systematic Name                                  | Standard Name | Systematic Name         | Standard Name |
| YBR041W                                          | FAT1          | YGR135W                 | PRE9          |
| YPL180W                                          | TCO89         | YLR398C                 | SKI2          |
| YOR076C                                          | SKI7          | YOR191W                 | RIS1          |
| YMR179W                                          | SPT21         | YGR188C                 | BUB1          |
| YJR060W                                          | CBF1          | YOL108C                 | INO4          |
| YDR137W                                          | RGP1          | YNL297C                 | MON2          |
| YDR358W                                          | GGA1          | YAL055W                 | PEX22         |
| YHR111W                                          | UBA4          | YGL124C                 | MON1          |
| YDR108W                                          | GSG1          | YOR109W                 | INP53         |
| YPL001W                                          | HAT1          | YMR055C                 | BUB2          |
| YNL041C                                          | COG6          | YMR214W                 | SCJ1          |
| YOR106W                                          | VAM3          | YPR051W                 | MAK3          |
| YPL057C                                          | SUR1          | YML001W                 | YPT7          |
| YAL024C                                          | LTE1          | YHR111W                 | UBA4          |
| YDL223C                                          | HBT1          | YOR066W                 | MSA1          |
| YPR084W                                          | YPR084W       | YJL154C                 | VPS35         |
| YJR040W                                          | GEF1          | YEL053C                 | MAK10         |
| YDR439W                                          | LRS4          | YPL152W                 | RRD2          |
| YLR386W                                          | VAC14         | YGL151W                 | NUT1          |
| YNL297C                                          | MON2          | YOR109W                 | INP53         |
| YOR039W                                          | CKB2          | YNL206C                 | RTT106        |
| YPL106C                                          | SSE1          | YDL047W                 | SIT4          |
| YGR072W                                          | UPF3          | YKR001C                 | VPS1          |
| YMR216C                                          | SKY1          | YPL037C                 | EGD1          |
| YNL058C                                          | YNL058C       | YMR152W                 | YIM1          |
| YKL160W                                          | ELF1          | YLR410W                 | VIP1          |
| YML001W                                          | YPT7          | YJR033C                 | RAV1          |
| YBR084C-A                                        | RPL19A        | YJL095W                 | BCK1          |
| YNL243W                                          | SLA2          | YLR330W                 | CHS5          |

| Predictions at threshold level 0.75 continued... |               |                         |               |
|--------------------------------------------------|---------------|-------------------------|---------------|
| Gene1 of predicted pair                          |               | Gene2 of predicted pair |               |
| Systematic Name                                  | Standard Name | Systematic Name         | Standard Name |
| YJR059W                                          | PTK2          | YER110C                 | KAP123        |
| YOR290C                                          | SNF2          | YDR469W                 | SDC1          |
| YPR017C                                          | DSS4          | YEL043W                 | YEL043W       |
| YLR090W                                          | XDJ1          | YKL126W                 | YPK1          |
| YPL058C                                          | PDR12         | YDR423C                 | CAD1          |
| YOR080W                                          | DIA2          | YDR318W                 | MCM21         |
| YBL008W                                          | HIR1          | YPR120C                 | CLB5          |
| YBR171W                                          | SEC66         | YCR053W                 | THR4          |
| YER120W                                          | SCS2          | YPR032W                 | SRO7          |
| YPL024W                                          | RMI1          | YPR030W                 | CSR2          |
| YLR102C                                          | APC9          | YGL031C                 | RPL24A        |
| YKL025C                                          | PAN3          | YML016C                 | PPZ1          |
| YIL076W                                          | SEC28         | YPL161C                 | BEM4          |
| YBR215W                                          | HPC2          | YMR055C                 | BUB2          |
| YNL297C                                          | MON2          | YPL234C                 | TFP3          |
| YDR477W                                          | SNF1          | YML071C                 | COG8          |
| YLR315W                                          | NKP2          | YLR350W                 | ORM2          |
| YDL013W                                          | SLX5          | YGL031C                 | RPL24A        |
| YPL042C                                          | SSN3          | YMR037C                 | MSN2          |
| YHR060W                                          | VMA22         | YBR280C                 | SAF1          |
| YMR092C                                          | AIP1          | YDR389W                 | SAC7          |
| YLR083C                                          | EMP70         | YPR051W                 | MAK3          |
| YBR171W                                          | SEC66         | YHR114W                 | BZZ1          |
| YMR202W                                          | ERG2          | YJL095W                 | BCK1          |
| YMR199W                                          | CLN1          | YBL047C                 | EDE1          |
| YOR191W                                          | RIS1          | YOR243C                 | PUS7          |
| YGL175C                                          | SAE2          | YML028W                 | TSA1          |
| YEL043W                                          | YEL043W       | YOR327C                 | SNC2          |
| YDL059C                                          | RAD59         | YGL175C                 | SAE2          |

| Predictions at threshold level 0.75 continued... |               |                         |               |
|--------------------------------------------------|---------------|-------------------------|---------------|
| Gene1 of predicted pair                          |               | Gene2 of predicted pair |               |
| Systematic Name                                  | Standard Name | Systematic Name         | Standard Name |
| YOR127W                                          | RGA1          | YPR051W                 | MAK3          |
| YAL024C                                          | LTE1          | YFR030W                 | MET10         |
| YML095C                                          | RAD10         | YBR084C-A               | RPL19A        |
| YBR290W                                          | BSD2          | YMR273C                 | ZDS1          |
| YDR076W                                          | RAD55         | YJR035W                 | RAD26         |
| YFL023W                                          | BUD27         | YEL053C                 | MAK10         |
| YNL069C                                          | RPL16B        | YDL077C                 | VAM6          |
| YDR245W                                          | MNN10         | YJL006C                 | CTK2          |
| YGL087C                                          | MMS2          | YLR381W                 | CTF3          |
| YKR099W                                          | BAS1          | YLR093C                 | NYV1          |
| YBR127C                                          | VMA2          | YNL238W                 | KEX2          |
| YPL042C                                          | SSN3          | YGR252W                 | GCN5          |
| YBL058W                                          | SHP1          | YHR081W                 | LRP1          |
| YML095C                                          | RAD10         | YMR201C                 | RAD14         |
| YPL195W                                          | APL5          | YMR230W                 | RPS10B        |
| YMR224C                                          | MRE11         | YMR214W                 | SCJ1          |
| YJR056C                                          | YJR056C       | YML001W                 | YPT7          |
| YDR108W                                          | GSG1          | YJR060W                 | CBF1          |
| YMR199W                                          | CLN1          | YFL023W                 | BUD27         |
| YGL066W                                          | SGF73         | YPR046W                 | MCM16         |
| YGR239C                                          | PEX21         | YNL214W                 | PEX17         |
| YOR132W                                          | VPS17         | YER122C                 | GLO3          |
| YBL088C                                          | TEL1          | YML095C                 | RAD10         |
| YLR083C                                          | EMP70         | YJR060W                 | CBF1          |
| YJL095W                                          | BCK1          | YDL077C                 | VAM6          |
| YMR095C                                          | SNO1          | YMR230W                 | RPS10B        |
| YBR010W                                          | HHT1          | YLR357W                 | RSC2          |
| YGR104C                                          | SRB5          | YGR270W                 | YTA7          |
| YJL154C                                          | VPS35         | YCL037C                 | SRO9          |

| Predictions at threshold level 0.75 continued... |               |                         |               |
|--------------------------------------------------|---------------|-------------------------|---------------|
| Gene1 of predicted pair                          |               | Gene2 of predicted pair |               |
| Systematic Name                                  | Standard Name | Systematic Name         | Standard Name |
| YMR224C                                          | MRE11         | YML062C                 | MFT1          |
| YDL002C                                          | NHP10         | YOR213C                 | SAS5          |
| YGL054C                                          | ERV14         | YHR012W                 | VPS29         |
| YJR140C                                          | HIR3          | YPL057C                 | SUR1          |
| YDR260C                                          | SWM1          | YCR086W                 | CSM1          |
| YER096W                                          | SHC1          | YOR014W                 | RTS1          |
| YDL161W                                          | ENT1          | YCR088W                 | ABP1          |
| YPR030W                                          | CSR2          | YDR207C                 | UME6          |
| YDR383C                                          | NKP1          | YMR224C                 | MRE11         |
| YDR137W                                          | RGP1          | YJL183W                 | MNN11         |
| YJL006C                                          | CTK2          | YNL079C                 | TPM1          |
| YNL069C                                          | RPL16B        | YHR012W                 | VPS29         |
| YJL124C                                          | LSM1          | YOR141C                 | ARP8          |
| YDR507C                                          | GIN4          | YHR200W                 | RPN10         |
| YDL116W                                          | NUP84         | YGL175C                 | SAE2          |
| YOR358W                                          | HAP5          | YKL109W                 | HAP4          |
| YKR001C                                          | VPS1          | YDL192W                 | ARF1          |
| YLR095C                                          | IOC2          | YBR171W                 | SEC66         |
| YBR019C                                          | GAL10         | YBR280C                 | SAF1          |
| YDL020C                                          | RPN4          | YML095C                 | RAD10         |
| YEL065W                                          | SIT1          | YLR095C                 | IOC2          |
| YJR032W                                          | CPR7          | YMR152W                 | YIM1          |
| YDL101C                                          | DUN1          | YGL175C                 | SAE2          |
| YEL065W                                          | SIT1          | YML001W                 | YPT7          |
| YHR157W                                          | REC104        | YJR021C                 | REC107        |
| YIL002C                                          | INP51         | YPR173C                 | VPS4          |
| YML115C                                          | VAN1          | YBL025W                 | RRN10         |
| YPL024W                                          | RMI1          | YLR320W                 | MMS22         |
| YMR153W                                          | NUP53         | YKL117W                 | SBA1          |

| Predictions at threshold level 0.75 continued... |               |                         |               |
|--------------------------------------------------|---------------|-------------------------|---------------|
| Gene1 of predicted pair                          |               | Gene2 of predicted pair |               |
| Systematic Name                                  | Standard Name | Systematic Name         | Standard Name |
| YML001W                                          | YPT7          | YMR231W                 | PEP5          |
| YDR174W                                          | HMO1          | YBR200W                 | BEM1          |
| YML095C                                          | RAD10         | YPL161C                 | BEM4          |
| YEL044W                                          | IES6          | YPL050C                 | MNN9          |
| YDL180W                                          | YDL180W       | YDR319C                 | YDR319C       |
| YPR084W                                          | YPR084W       | YMR054W                 | STV1          |
| YOR337W                                          | TEA1          | YMR152W                 | YIM1          |
| YKL160W                                          | ELF1          | YNL107W                 | YAF9          |
| YMR095C                                          | SNO1          | YOR337W                 | TEA1          |
| YMR026C                                          | PEX12         | YBR173C                 | UMP1          |
| YBR108W                                          | YBR108W       | YGR268C                 | HUA1          |
| YPL240C                                          | HSP82         | YPR118W                 | MRI1          |
| YDR477W                                          | SNF1          | YNL199C                 | GCR2          |
| YGL066W                                          | SGF73         | YLR032W                 | RAD5          |
| YGR133W                                          | PEX4          | YML097C                 | VPS9          |
| YLR083C                                          | EMP70         | YDR153C                 | ENT5          |
| YJL006C                                          | CTK2          | YFR036W                 | CDC26         |
| YJR032W                                          | CPR7          | YMR311C                 | GLC8          |
| YER116C                                          | SLX8          | YGL003C                 | CDH1          |
| YFR031C-A                                        | RPL2A         | YNL058C                 | YNL058C       |
| YGL066W                                          | SGF73         | YOR014W                 | RTS1          |
| YHR115C                                          | DMA1          | YGL031C                 | RPL24A        |
| YNL058C                                          | YNL058C       | YJR084W                 | CSN12         |
| YDL020C                                          | RPN4          | YGL253W                 | HXK2          |
| YBR107C                                          | IML3          | YGL163C                 | RAD54         |
| YNL291C                                          | MID1          | YDL077C                 | VAM6          |
| YLR234W                                          | TOP3          | YDL059C                 | RAD59         |
| YLL039C                                          | UBI4          | YER143W                 | DDI1          |
| YJR140C                                          | HIR3          | YPL001W                 | HAT1          |



| Predictions at threshold level 0.75 continued... |               |                         |               |
|--------------------------------------------------|---------------|-------------------------|---------------|
| Gene1 of predicted pair                          |               | Gene2 of predicted pair |               |
| Systematic Name                                  | Standard Name | Systematic Name         | Standard Name |
| YMR224C                                          | MRE11         | YGL031C                 | RPL24A        |
| YGL033W                                          | HOP2          | YFL023W                 | BUD27         |
| YBL047C                                          | EDE1          | YLR425W                 | TUS1          |
| YDR108W                                          | GSG1          | YOR308C                 | SNU66         |
| YGR104C                                          | SRB5          | YBR260C                 | RGD1          |
| YER179W                                          | DMC1          | YPL121C                 | MEI5          |
| YER116C                                          | SLX8          | YBR073W                 | RDH54         |
| YJL095W                                          | BCK1          | YKL161C                 | YKL161C       |
| YOR038C                                          | HIR2          | YOR308C                 | SNU66         |
| YPL037C                                          | EGD1          | YAR014C                 | BUD14         |
| YJR135C                                          | MCM22         | YOL091W                 | SPO21         |
| YER110C                                          | KAP123        | YJR032W                 | CPR7          |
| YGL147C                                          | RPL9A         | YGL025C                 | PGD1          |
| YOR083W                                          | WHI5          | YJR035W                 | RAD26         |
| YHR081W                                          | LRP1          | YGL124C                 | MON1          |
| YDR245W                                          | MNN10         | YKR020W                 | VPS51         |
| YBR107C                                          | IML3          | YDR260C                 | SWM1          |
| YOR033C                                          | EXO1          | YML062C                 | MFT1          |
| YCR066W                                          | RAD18         | YKL114C                 | APN1          |
| YNL238W                                          | KEX2          | YER122C                 | GLO3          |
| YGL147C                                          | RPL9A         | YPL024W                 | RMI1          |
| YLR360W                                          | VPS38         | YDL161W                 | ENT1          |
| YNL031C                                          | HHT2          | YJR063W                 | RPA12         |
| YNL058C                                          | YNL058C       | YGL124C                 | MON1          |
| YJL128C                                          | PBS2          | YCR073C                 | SSK22         |
| YDR176W                                          | NGG1          | YKL139W                 | CTK1          |
| YMR054W                                          | STV1          | YJR032W                 | CPR7          |
| YAL024C                                          | LTE1          | YGL212W                 | VAM7          |
| YLR083C                                          | EMP70         | YPL195W                 | APL5          |

| Predictions at threshold level 0.75 continued... |               |                         |               |
|--------------------------------------------------|---------------|-------------------------|---------------|
| Gene1 of predicted pair                          |               | Gene2 of predicted pair |               |
| Systematic Name                                  | Standard Name | Systematic Name         | Standard Name |
| YGL060W                                          | YBP2          | YMR202W                 | ERG2          |
| YKL139W                                          | CTK1          | YLR306W                 | UBC12         |
| YPL105C                                          | YPL105C       | YML038C                 | YMD8          |
| YPR051W                                          | MAK3          | YPR032W                 | SRO7          |
| YBL072C                                          | RPS8A         | YHL002W                 | HSE1          |
| YHR111W                                          | UBA4          | YBR114W                 | RAD16         |
| YKR020W                                          | VPS51         | YGL054C                 | ERV14         |
| YJL036W                                          | SNX4          | YPL195W                 | APL5          |
| YPR040W                                          | TIP41         | YDL047W                 | SIT4          |
| YKR072C                                          | SIS2          | YCR077C                 | PAT1          |
| YNL051W                                          | COG5          | YPR032W                 | SRO7          |
| YPL096C-A                                        | ERI1          | YGR135W                 | PRE9          |
| YGL212W                                          | VAM7          | YOL121C                 | RPS19A        |
| YLR192C                                          | HCR1          | YJL095W                 | BCK1          |
| YPR017C                                          | DSS4          | YNL291C                 | MID1          |
| YPR017C                                          | DSS4          | YGR105W                 | VMA21         |
| YLR018C                                          | POM34         | YNL199C                 | GCR2          |
| YML058W                                          | SML1          | YDR253C                 | MET32         |
| YDR146C                                          | SWI5          | YOR275C                 | RIM20         |
| YAR014C                                          | BUD14         | YLR182W                 | SWI6          |
| YMR142C                                          | RPL13B        | YNR072W                 | HXT17         |
| YKL139W                                          | CTK1          | YGL124C                 | MON1          |
| YOR312C                                          | RPL20B        | YLR182W                 | SWI6          |
| YIL159W                                          | BNR1          | YNR072W                 | HXT17         |
| YHR178W                                          | STB5          | YDL155W                 | CLB3          |
| YHR200W                                          | RPN10         | YML071C                 | COG8          |
| YDL160C                                          | DHH1          | YML058W                 | SML1          |
| YLR410W                                          | VIP1          | YJR035W                 | RAD26         |
| YGL212W                                          | VAM7          | YJR040W                 | GEF1          |

| Predictions at threshold level 0.75 continued... |               |                         |               |
|--------------------------------------------------|---------------|-------------------------|---------------|
| Gene1 of predicted pair                          |               | Gene2 of predicted pair |               |
| Systematic Name                                  | Standard Name | Systematic Name         | Standard Name |
| YPR051W                                          | MAK3          | YBR114W                 | RAD16         |
| YGL237C                                          | HAP2          | YKL048C                 | ELM1          |
| YPL024W                                          | RMI1          | YKL048C                 | ELM1          |
| YER174C                                          | GRX4          | YJL129C                 | TRK1          |
| YMR224C                                          | MRE11         | YDR310C                 | SUM1          |
| YKR020W                                          | VPS51         | YPL089C                 | RLM1          |
| YKL126W                                          | YPK1          | YLR371W                 | ROM2          |
| YMR133W                                          | REC114        | YPR030W                 | CSR2          |
| YHR052W                                          | CIC1          | YDR312W                 | SSF2          |
| YEL053C                                          | MAK10         | YER040W                 | GLN3          |
| YPL024W                                          | RMI1          | YLR094C                 | GIS3          |
| YJR056C                                          | YJR056C       | YLR320W                 | MMS22         |
| YDR137W                                          | RGP1          | YDL083C                 | RPS16B        |
| YNL218W                                          | MGS1          | YBL079W                 | NUP170        |
| YKL048C                                          | ELM1          | YFR030W                 | MET10         |
| YAL024C                                          | LTE1          | YKR035W-A               | DID2          |
| YIL053W                                          | RHR2          | YGL147C                 | RPL9A         |
| YDR202C                                          | RAV2          | YEL053C                 | MAK10         |
| YBR290W                                          | BSD2          | YIL156W                 | UBP7          |
| YDR254W                                          | CHL4          | YJR063W                 | RPA12         |
| YLR079W                                          | SIC1          | YLR254C                 | NDL1          |
| YMR216C                                          | SKY1          | YDR153C                 | ENT5          |
| YNL229C                                          | URE2          | YER040W                 | GLN3          |
| YLR095C                                          | IOC2          | YER044C                 | ERG28         |
| YDL216C                                          | RRI1          | YOL117W                 | RRI2          |
| YDR392W                                          | SPT3          | YBR111W-A               | SUS1          |
| YMR068W                                          | AVO2          | YNL229C                 | URE2          |
| YFR010W                                          | UBP6          | YDR318W                 | MCM21         |
| YGR184C                                          | UBR1          | YNL307C                 | MCK1          |

| Predictions at threshold level 0.75 continued... |               |                         |               |
|--------------------------------------------------|---------------|-------------------------|---------------|
| Gene1 of predicted pair                          |               | Gene2 of predicted pair |               |
| Systematic Name                                  | Standard Name | Systematic Name         | Standard Name |
| YMR127C                                          | SAS2          | YBR107C                 | IML3          |
| YKL139W                                          | CTK1          | YOL111C                 | MDY2          |
| YNR049C                                          | MSO1          | YPR032W                 | SRO7          |
| YDL020C                                          | RPN4          | YPL018W                 | CTF19         |
| YBR217W                                          | ATG12         | YPR036W                 | VMA13         |
| YKR035W-A                                        | DID2          | YJL095W                 | BCK1          |
| YJL154C                                          | VPS35         | YDL161W                 | ENT1          |
| YLR337C                                          | VRP1          | YHR200W                 | RPN10         |
| YIL103W                                          | DPH1          | YCR086W                 | CSM1          |
| YOR358W                                          | HAP5          | YGR188C                 | BUB1          |
| YMR032W                                          | HOF1          | YBL085W                 | BOI1          |
| YDR378C                                          | LSM6          | YPR046W                 | MCM16         |
| YFR010W                                          | UBP6          | YPL037C                 | EGD1          |
| YOR026W                                          | BUB3          | YHR205W                 | SCH9          |
| YKL048C                                          | ELM1          | YDL194W                 | SNF3          |
| YNL025C                                          | SSN8          | YJL124C                 | LSM1          |
| YGR270W                                          | YTA7          | YHR167W                 | THP2          |
| YAL024C                                          | LTE1          | YER144C                 | UBP5          |
| YAL015C                                          | NTG1          | YKL114C                 | APN1          |
| YDR245W                                          | MNN10         | YBR215W                 | HPC2          |
| YOR337W                                          | TEA1          | YMR139W                 | RIM11         |
| YLR288C                                          | MEC3          | YOR368W                 | RAD17         |
| YNL087W                                          | TCB2          | YOR043W                 | WHI2          |
| YBR194W                                          | SOY1          | YJR060W                 | CBF1          |
| YML001W                                          | YPT7          | YLR371W                 | ROM2          |
| YNL218W                                          | MGS1          | YOR243C                 | PUS7          |
| YDR329C                                          | PEX3          | YJL210W                 | PEX2          |
| YOL062C                                          | APM4          | YPL259C                 | APM1          |
| YJR059W                                          | PTK2          | YGR059W                 | SPR3          |

| Predictions at threshold level 0.75 continued... |               |                         |               |
|--------------------------------------------------|---------------|-------------------------|---------------|
| Gene1 of predicted pair                          |               | Gene2 of predicted pair |               |
| Systematic Name                                  | Standard Name | Systematic Name         | Standard Name |
| YLR181C                                          | VTA1          | YPR173C                 | VPS4          |
| YJL060W                                          | BNA3          | YML095C                 | RAD10         |
| YMR199W                                          | CLN1          | YGR135W                 | PRE9          |
| YLR337C                                          | VRP1          | YLR447C                 | VMA6          |
| YDR507C                                          | GIN4          | YGL208W                 | SIP2          |
| YAL024C                                          | LTE1          | YER139C                 | YER139C       |
| YOR083W                                          | WHI5          | YMR198W                 | CIK1          |
| YDR245W                                          | MNN10         | YEL013W                 | VAC8          |
| YGR072W                                          | UPF3          | YMR054W                 | STV1          |
| YGR104C                                          | SRB5          | YBL075C                 | SSA3          |
| YKR020W                                          | VPS51         | YOL018C                 | TLG2          |
| YAL024C                                          | LTE1          | YHR039C-A               | VMA10         |
| YPR036W                                          | VMA13         | YNR072W                 | HXT17         |
| YNL032W                                          | SIW14         | YGL115W                 | SNF4          |
| YNR023W                                          | SNF12         | YER161C                 | SPT2          |
| YAL024C                                          | LTE1          | YDL223C                 | HBT1          |
| YOR112W                                          | CEX1          | YMR216C                 | SKY1          |
| YHL031C                                          | GOS1          | YOR036W                 | PEP12         |
| YLR234W                                          | TOP3          | YJR135C                 | MCM22         |
| YDR363W-A                                        | SEM1          | YDR469W                 | SDC1          |
| YBL058W                                          | SHP1          | YJL095W                 | BCK1          |
| YHR052W                                          | CIC1          | YKR057W                 | RPS21A        |
| YOR106W                                          | VAM3          | YER042W                 | MXR1          |
| YMR224C                                          | MRE11         | YGR081C                 | SLX9          |
| YER116C                                          | SLX8          | YLR398C                 | SKI2          |
| YKL006W                                          | RPL14A        | YJL006C                 | CTK2          |
| YDL077C                                          | VAM6          | YNR032W                 | PPG1          |
| YBR200W                                          | BEM1          | YKL129C                 | MYO3          |
| YCR065W                                          | HCM1          | YPL042C                 | SSN3          |

| Predictions at threshold level 0.75 continued... |               |                         |               |
|--------------------------------------------------|---------------|-------------------------|---------------|
| Gene1 of predicted pair                          |               | Gene2 of predicted pair |               |
| Systematic Name                                  | Standard Name | Systematic Name         | Standard Name |
| YMR127C                                          | SAS2          | YHR111W                 | UBA4          |
| YNL288W                                          | CAF40         | YOL067C                 | RTG1          |
| YDR477W                                          | SNF1          | YBR217W                 | ATG12         |
| YPL240C                                          | HSP82         | YER105C                 | NUP157        |
| YAL051W                                          | OAF1          | YMR198W                 | CIK1          |
| YHR178W                                          | STB5          | YOL067C                 | RTG1          |
| YEL050C                                          | RML2          | YOR001W                 | RRP6          |
| YHR079C                                          | IRE1          | YGL223C                 | COG1          |
| YMR172W                                          | HOT1          | YJL154C                 | VPS35         |
| YNL054W                                          | VAC7          | YNL116W                 | DMA2          |
| YJL053W                                          | PEP8          | YDR310C                 | SUM1          |
| YHR081W                                          | LRP1          | YBR019C                 | GAL10         |
| YPR131C                                          | NAT3          | YJR005W                 | APL1          |
| YMR224C                                          | MRE11         | YHR156C                 | LIN1          |
| YDR440W                                          | DOT1          | YEL013W                 | VAC8          |
| YOR290C                                          | SNF2          | YOR064C                 | YNG1          |
| YML058W                                          | SML1          | YGL115W                 | SNF4          |
| YFR031C-A                                        | RPL2A         | YNR032W                 | PPG1          |
| YBR126C                                          | TPS1          | YFL033C                 | RIM15         |
| YJL036W                                          | SNX4          | YMR054W                 | STV1          |
| YDL020C                                          | RPN4          | YHR012W                 | VPS29         |
| YNL243W                                          | SLA2          | YNL153C                 | GIM3          |
| YBR215W                                          | HPC2          | YPL256C                 | CLN2          |
| YGL178W                                          | MPT5          | YLR418C                 | CDC73         |
| YNR052C                                          | POP2          | YJL164C                 | TPK1          |
| YPR052C                                          | NHP6A         | YDL160C                 | DHH1          |
| YDR477W                                          | SNF1          | YCR053W                 | THR4          |
| YOL090W                                          | MSH2          | YNL076W                 | MKS1          |
| YHL031C                                          | GOS1          | YCL037C                 | SRO9          |

| Predictions at threshold level 0.75 continued... |               |                         |               |
|--------------------------------------------------|---------------|-------------------------|---------------|
| Gene1 of predicted pair                          |               | Gene2 of predicted pair |               |
| Systematic Name                                  | Standard Name | Systematic Name         | Standard Name |
| YMR039C                                          | SUB1          | YML016C                 | PPZ1          |
| YLR094C                                          | GIS3          | YBL025W                 | RRN10         |
| YKL032C                                          | IXR1          | YDR264C                 | AKR1          |
| YMR016C                                          | SOK2          | YNL076W                 | MKS1          |
| YMR198W                                          | CIK1          | YGR133W                 | PEX4          |
| YKR001C                                          | VPS1          | YER120W                 | SCS2          |
| YHR081W                                          | LRP1          | YPL195W                 | APL5          |
| YBR107C                                          | IML3          | YJL095W                 | BCK1          |
| YDR202C                                          | RAV2          | YNL127W                 | FAR11         |
| YLR386W                                          | VAC14         | YPR030W                 | CSR2          |
| YJL095W                                          | BCK1          | YEL036C                 | ANP1          |
| YAL024C                                          | LTE1          | YKL139W                 | CTK1          |
| YNL107W                                          | YAF9          | YNL225C                 | CNM67         |
| YJL006C                                          | CTK2          | YNL107W                 | YAF9          |
| YPR051W                                          | MAK3          | YFL033C                 | RIM15         |
| YOR195W                                          | SLK19         | YDR207C                 | UME6          |
| YPR084W                                          | YPR084W       | YPL195W                 | APL5          |
| YNL264C                                          | PDR17         | YGR014W                 | MSB2          |
| YOR127W                                          | RGA1          | YML071C                 | COG8          |
| YIR003W                                          | YIR003W       | YDR245W                 | MNN10         |
| YPR036W                                          | VMA13         | YCR053W                 | THR4          |
| YFR010W                                          | UBP6          | YMR016C                 | SOK2          |
| YMR172W                                          | HOT1          | YGL253W                 | HXK2          |
| YLR079W                                          | SIC1          | YMR164C                 | MSS11         |
| YOR033C                                          | EXO1          | YLR234W                 | TOP3          |
| YPL115C                                          | BEM3          | YOR127W                 | RGA1          |
| YDR261C                                          | EXG2          | YMR214W                 | SCJ1          |
| YNR072W                                          | HXT17         | YHR081W                 | LRP1          |
| YMR116C                                          | ASC1          | YLR410W                 | VIP1          |

| Predictions at threshold level 0.75 continued... |               |                         |               |
|--------------------------------------------------|---------------|-------------------------|---------------|
| Gene1 of predicted pair                          |               | Gene2 of predicted pair |               |
| Systematic Name                                  | Standard Name | Systematic Name         | Standard Name |
| YLR093C                                          | NYV1          | YDR207C                 | UME6          |
| YFR036W                                          | CDC26         | YNL225C                 | CNM67         |
| YNL297C                                          | MON2          | YEL053C                 | MAK10         |
| YBL102W                                          | SFT2          | YER162C                 | RAD4          |
| YFL023W                                          | BUD27         | YML102W                 | CAC2          |
| YCR088W                                          | ABP1          | YPL045W                 | VPS16         |
| YMR054W                                          | STV1          | YOL108C                 | INO4          |
| YGL246C                                          | RAI1          | YIL133C                 | RPL16A        |
| YBL071W-A                                        | KTI11         | YOL121C                 | RPS19A        |
| YPR171W                                          | BSP1          | YMR109W                 | MYO5          |
| YDR245W                                          | MNN10         | YDL002C                 | NHP10         |
| YLR425W                                          | TUS1          | YDR207C                 | UME6          |
| YLR452C                                          | SST2          | YJR032W                 | CPR7          |
| YBR171W                                          | SEC66         | YBR019C                 | GAL10         |
| YOR290C                                          | SNF2          | YLR180W                 | SAM1          |
| YBR171W                                          | SEC66         | YDR358W                 | GGA1          |
| YDR137W                                          | RGP1          | YAL002W                 | VPS8          |
| YIL053W                                          | RHR2          | YGL078C                 | DBP3          |
| YHR060W                                          | VMA22         | YER139C                 | YER139C       |
| YPL115C                                          | BEM3          | YOR132W                 | VPS17         |
| YML115C                                          | VAN1          | YLR094C                 | GIS3          |
| YDR448W                                          | ADA2          | YBL002W                 | HTB2          |
| YML115C                                          | VAN1          | YER144C                 | UBP5          |
| YJR063W                                          | RPA12         | YDR318W                 | MCM21         |
| YOR083W                                          | WHI5          | YBR107C                 | IML3          |
| YOR124C                                          | UBP2          | YML099C                 | ARG81         |
| YDR254W                                          | CHL4          | YLR429W                 | CRN1          |
| YDR129C                                          | SAC6          | YJR032W                 | CPR7          |
| YKR020W                                          | VPS51         | YER120W                 | SCS2          |



| Predictions at threshold level 0.75 continued... |               |                         |               |
|--------------------------------------------------|---------------|-------------------------|---------------|
| Gene1 of predicted pair                          |               | Gene2 of predicted pair |               |
| Systematic Name                                  | Standard Name | Systematic Name         | Standard Name |
| YNL218W                                          | MGS1          | YOR191W                 | RIS1          |
| YDR207C                                          | UME6          | YKR030W                 | GMH1          |
| YPL106C                                          | SSE1          | YDR318W                 | MCM21         |
| YLR370C                                          | ARC18         | YLR425W                 | TUS1          |
| YIL156W                                          | UBP7          | YBL079W                 | NUP170        |
| YFL023W                                          | BUD27         | YLR398C                 | SKI2          |
| YBR217W                                          | ATG12         | YDR137W                 | RGP1          |
| YPR084W                                          | YPR084W       | YDL002C                 | NHP10         |
| YOR290C                                          | SNF2          | YLR370C                 | ARC18         |
| YGR249W                                          | MGA1          | YOR066W                 | MSA1          |
| YNL201C                                          | PSY2          | YLR410W                 | VIP1          |
| YGR249W                                          | MGA1          | YBR108W                 | YBR108W       |
| YMR246W                                          | FAA4          | YMR313C                 | TGL3          |
| YMR273C                                          | ZDS1          | YPL161C                 | BEM4          |
| YDL083C                                          | RPS16B        | YER122C                 | GLO3          |
| YPL115C                                          | BEM3          | YEL056W                 | HAT2          |
| YPL096C-A                                        | ERI1          | YGL212W                 | VAM7          |
| YOR156C                                          | NFI1          | YGL237C                 | HAP2          |
| YGL025C                                          | PGD1          | YML071C                 | COG8          |
| YIL008W                                          | URM1          | YJL190C                 | RPS22A        |
| YOR191W                                          | RIS1          | YHR077C                 | NMD2          |
| YML103C                                          | NUP188        | YNL199C                 | GCR2          |
| YGR020C                                          | VMA7          | YAR014C                 | BUD14         |
| YDR484W                                          | VPS52         | YOL018C                 | TLG2          |
| YIL034C                                          | CAP2          | YDR155C                 | CPR1          |
| YJL124C                                          | LSM1          | YML028W                 | TSA1          |
| YLR234W                                          | TOP3          | YOR039W                 | CKB2          |
| YPL195W                                          | APL5          | YOR327C                 | SNC2          |
| YOL121C                                          | RPS19A        | YMR214W                 | SCJ1          |

| Predictions at threshold level 0.75 continued... |               |                         |               |
|--------------------------------------------------|---------------|-------------------------|---------------|
| Gene1 of predicted pair                          |               | Gene2 of predicted pair |               |
| Systematic Name                                  | Standard Name | Systematic Name         | Standard Name |
| YJL183W                                          | MNN11         | YLR398C                 | SKI2          |
| YOL117W                                          | RRI2          | YJR084W                 | CSN12         |
| YMR198W                                          | CIK1          | YBR194W                 | SOY1          |
| YML115C                                          | VAN1          | YKR099W                 | BAS1          |
| YNL243W                                          | SLA2          | YML094W                 | GIM5          |
| YGR261C                                          | APL6          | YNL238W                 | KEX2          |
| YJR135C                                          | MCM22         | YDL226C                 | GCS1          |
| YFR010W                                          | UBP6          | YHR013C                 | ARD1          |
| YNL243W                                          | SLA2          | YJL148W                 | RPA34         |
| YPL024W                                          | RMI1          | YML071C                 | COG8          |
| YML058W                                          | SML1          | YPR120C                 | CLB5          |
| YDR443C                                          | SSN2          | YOR008C                 | SLG1          |
| YLR234W                                          | TOP3          | YML013W                 | UBX2          |
| YHR161C                                          | YAP1801       | YOR035C                 | SHE4          |
| YDR443C                                          | SSN2          | YMR142C                 | RPL13B        |
| YMR004W                                          | MVP1          | YGR020C                 | VMA7          |
| YJR106W                                          | ECM27         | YMR319C                 | FET4          |
| YKL116C                                          | PRR1          | YMR311C                 | GLC8          |
| YMR095C                                          | SNO1          | YJR084W                 | CSN12         |
| YKL080W                                          | VMA5          | YJL095W                 | BCK1          |
| YLR083C                                          | EMP70         | YNL069C                 | RPL16B        |
| YKR095W                                          | MLP1          | YKL068W                 | NUP100        |
| YGR100W                                          | MDR1          | YHR203C                 | RPS4B         |
| YHR200W                                          | RPN10         | YKR048C                 | NAP1          |
| YDL184C                                          | RPL41A        | YMR153W                 | NUP53         |
| YDR071C                                          | PAA1          | YJL140W                 | RPB4          |
| YDL175C                                          | AIR2          | YNL147W                 | LSM7          |
| YHL020C                                          | OPI1          | YER120W                 | SCS2          |
| YNL291C                                          | MID1          | YJR060W                 | CBF1          |

| Predictions at threshold level 0.75 continued... |               |                         |               |
|--------------------------------------------------|---------------|-------------------------|---------------|
| Gene1 of predicted pair                          |               | Gene2 of predicted pair |               |
| Systematic Name                                  | Standard Name | Systematic Name         | Standard Name |
| YJL057C                                          | IKS1          | YPR119W                 | CLB2          |
| YOR083W                                          | WHI5          | YDR254W                 | CHL4          |
| YGR184C                                          | UBR1          | YLR032W                 | RAD5          |
| YHR039C-A                                        | VMA10         | YER040W                 | GLN3          |
| YBL008W                                          | HIR1          | YLR320W                 | MMS22         |
| YFL013C                                          | IES1          | YLR315W                 | NKP2          |
| YNL079C                                          | TPM1          | YBL067C                 | UBP13         |
| YJR059W                                          | PTK2          | YIL148W                 | RPL40A        |
| YGL250W                                          | RMR1          | YLR350W                 | ORM2          |
| YOR023C                                          | AHC1          | YEL056W                 | HAT2          |
| YGR072W                                          | UPF3          | YPR032W                 | SRO7          |
| YJL060W                                          | BNA3          | YLR058C                 | SHM2          |
| YNR072W                                          | HXT17         | YLR371W                 | ROM2          |
| YOR132W                                          | VPS17         | YHR012W                 | VPS29         |
| YLR192C                                          | HCR1          | YMR214W                 | SCJ1          |
| YKL126W                                          | YPK1          | YPR046W                 | MCM16         |
| YKR035W-A                                        | DID2          | YBR019C                 | GAL10         |
| YLR135W                                          | SLX4          | YGR071C                 | YGR071C       |
| YNL325C                                          | FIG4          | YLR370C                 | ARC18         |
| YBL058W                                          | SHP1          | YBR030W                 | YBR030W       |
| YMR224C                                          | MRE11         | YER116C                 | SLX8          |
| YMR153W                                          | NUP53         | YDL077C                 | VAM6          |
| YIL076W                                          | SEC28         | YDL184C                 | RPL41A        |
| YMR038C                                          | CCS1          | YOR014W                 | RTS1          |
| YLR234W                                          | TOP3          | YMR199W                 | CLN1          |
| YDR439W                                          | LRS4          | YJR063W                 | RPA12         |
| YDR110W                                          | FOB1          | YBR119W                 | MUD1          |
| YGR054W                                          | YGR054W       | YGR188C                 | BUB1          |
| YML001W                                          | YPT7          | YDR261C                 | EXG2          |

| Predictions at threshold level 0.75 continued... |               |                         |               |
|--------------------------------------------------|---------------|-------------------------|---------------|
| Gene1 of predicted pair                          |               | Gene2 of predicted pair |               |
| Systematic Name                                  | Standard Name | Systematic Name         | Standard Name |
| YLR399C                                          | BDF1          | YML074C                 | FPR3          |
| YMR224C                                          | MRE11         | YMR284W                 | YKU70         |
| YMR152W                                          | YIM1          | YOR327C                 | SNC2          |
| YDL192W                                          | ARF1          | YDL077C                 | VAM6          |
| YLR234W                                          | TOP3          | YBL021C                 | HAP3          |
| YDR137W                                          | RGP1          | YOL081W                 | IRA2          |
| YEL027W                                          | CUP5          | YJL095W                 | BCK1          |
| YNL325C                                          | FIG4          | YKR035W-A               | DID2          |
| YDR004W                                          | RAD57         | YLR234W                 | TOP3          |
| YDR310C                                          | SUM1          | YKR030W                 | GMH1          |
| YER116C                                          | SLX8          | YPL137C                 | GIP3          |
| YJL127C                                          | SPT10         | YDR378C                 | LSM6          |
| YBR107C                                          | IML3          | YDR183W                 | PLP1          |
| YOR080W                                          | DIA2          | YBR200W                 | BEM1          |
| YLR386W                                          | VAC14         | YNL307C                 | MCK1          |
| YPL178W                                          | CBC2          | YKR024C                 | DBP7          |
| YPL042C                                          | SSN3          | YLR315W                 | NKP2          |
| YKL139W                                          | CTK1          | YHR108W                 | GGA2          |
| YDR137W                                          | RGP1          | YHR060W                 | VMA22         |
| YDR225W                                          | HTA1          | YEL056W                 | HAT2          |
| YJL060W                                          | BNA3          | YDR254W                 | CHL4          |
| YDR293C                                          | SSD1          | YGL237C                 | HAP2          |
| YAL051W                                          | OAF1          | YDR076W                 | RAD55         |
| YBR200W                                          | BEM1          | YDR254W                 | CHL4          |
| YAL024C                                          | LTE1          | YKL126W                 | YPK1          |
| YPL057C                                          | SUR1          | YAL002W                 | VPS8          |
| YJL172W                                          | CPS1          | YDR261C                 | EXG2          |
| YNL307C                                          | MCK1          | YBR280C                 | SAF1          |
| YOR195W                                          | SLK19         | YLR058C                 | SHM2          |

| Predictions at threshold level 0.75 continued... |               |                         |               |
|--------------------------------------------------|---------------|-------------------------|---------------|
| Gene1 of predicted pair                          |               | Gene2 of predicted pair |               |
| Systematic Name                                  | Standard Name | Systematic Name         | Standard Name |
| YNL248C                                          | RPA49         | YOL054W                 | PSH1          |
| YNL288W                                          | CAF40         | YDR183W                 | PLP1          |
| YER107C                                          | GLE2          | YPR119W                 | CLB2          |
| YHL031C                                          | GOS1          | YOR038C                 | HIR2          |
| YDR363W-A                                        | SEM1          | YDR318W                 | MCM21         |
| YJL036W                                          | SNX4          | YDR153C                 | ENT5          |
| YFR010W                                          | UBP6          | YDL047W                 | SIT4          |
| YLL007C                                          | YLL007C       | YDR293C                 | SSD1          |
| YOR368W                                          | RAD17         | YJR035W                 | RAD26         |
| YFR010W                                          | UBP6          | YBL103C                 | RTG3          |
| YPL213W                                          | LEA1          | YJL006C                 | CTK2          |
| YOL051W                                          | GAL11         | YCR084C                 | TUP1          |
| YPL057C                                          | SUR1          | YNL238W                 | KEX2          |
| YGL124C                                          | MON1          | YDL226C                 | GCS1          |
| YPL037C                                          | EGD1          | YJR084W                 | CSN12         |
| YBR200W                                          | BEM1          | YGL253W                 | HXK2          |
| YKL048C                                          | ELM1          | YDR310C                 | SUM1          |
| YJL183W                                          | MNN11         | YBL072C                 | RPS8A         |
| YDR254W                                          | CHL4          | YOR141C                 | ARP8          |
| YNL107W                                          | YAF9          | YHR115C                 | DMA1          |
| YGR142W                                          | BTN2          | YER074W-A               | YOS1          |
| YKR001C                                          | VPS1          | YBR283C                 | SSH1          |
| YPL234C                                          | TFP3          | YNL107W                 | YAF9          |
| YBL102W                                          | SFT2          | YCR066W                 | RAD18         |
| YDL223C                                          | HBT1          | YKL048C                 | ELM1          |
| YOR127W                                          | RGA1          | YDR289C                 | RTT103        |
| YOR195W                                          | SLK19         | YKR061W                 | KTR2          |
| YIL053W                                          | RHR2          | YGL115W                 | SNF4          |
| YBR215W                                          | HPC2          | YLR320W                 | MMS22         |

| Predictions at threshold level 0.75 continued... |               |                         |               |
|--------------------------------------------------|---------------|-------------------------|---------------|
| Gene1 of predicted pair                          |               | Gene2 of predicted pair |               |
| Systematic Name                                  | Standard Name | Systematic Name         | Standard Name |
| YLR083C                                          | EMP70         | YOR106W                 | VAM3          |
| YPL129W                                          | TAF14         | YEL044W                 | IES6          |
| YBR173C                                          | UMP1          | YPL195W                 | APL5          |
| YJL154C                                          | VPS35         | YEL036C                 | ANP1          |
| YDR293C                                          | SSD1          | YER162C                 | RAD4          |
| YNL087W                                          | TCB2          | YOL081W                 | IRA2          |
| YGR055W                                          | MUP1          | YPL240C                 | HSP82         |
| YDR137W                                          | RGP1          | YPL161C                 | BEM4          |
| YGR249W                                          | MGA1          | YMR230W                 | RPS10B        |
| YIL034C                                          | CAP2          | YLR292C                 | SEC72         |
| YPR040W                                          | TIP41         | YPL161C                 | BEM4          |
| YBR111W-A                                        | SUS1          | YPL248C                 | GAL4          |
| YBL021C                                          | HAP3          | YOR358W                 | HAP5          |
| YAL024C                                          | LTE1          | YDL002C                 | NHP10         |
| YCL037C                                          | SRO9          | YPL195W                 | APL5          |
| YOR023C                                          | AHC1          | YPR051W                 | MAK3          |
| YIL159W                                          | BNR1          | YLR386W                 | VAC14         |
| YNL297C                                          | MON2          | YNL238W                 | KEX2          |
| YOR275C                                          | RIM20         | YJL095W                 | BCK1          |
| YER044C                                          | ERG28         | YDL192W                 | ARF1          |
| YBR030W                                          | YBR030W       | YMR133W                 | REC114        |
| YJR084W                                          | CSN12         | YML097C                 | VPS9          |
| YDR335W                                          | MSN5          | YER105C                 | NUP157        |
| YJL157C                                          | FAR1          | YJL187C                 | SWE1          |
| YDL184C                                          | RPL41A        | YBR036C                 | CSG2          |
| YDR293C                                          | SSD1          | YDL077C                 | VAM6          |
| YDR144C                                          | MKC7          | YJL095W                 | BCK1          |
| YPL178W                                          | CBC2          | YOR358W                 | HAP5          |
| YLR192C                                          | HCR1          | YDR261C                 | EXG2          |

| Predictions at threshold level 0.75 continued... |               |                         |               |
|--------------------------------------------------|---------------|-------------------------|---------------|
| Gene1 of predicted pair                          |               | Gene2 of predicted pair |               |
| Systematic Name                                  | Standard Name | Systematic Name         | Standard Name |
| YMR224C                                          | MRE11         | YDL077C                 | VAM6          |
| YJR140C                                          | HIR3          | YNL107W                 | YAF9          |
| YDR283C                                          | GCN2          | YPR119W                 | CLB2          |
| YMR153W                                          | NUP53         | YER139C                 | YER139C       |
| YGL200C                                          | EMP24         | YJL095W                 | BCK1          |
| YEL009C                                          | GCN4          | YBL008W                 | HIR1          |
| YDL020C                                          | RPN4          | YDR293C                 | SSD1          |
| YGL163C                                          | RAD54         | YDR289C                 | RTT103        |
| YFR010W                                          | UBP6          | YNR072W                 | HXT17         |
| YLR441C                                          | RPS1A         | YDR261C                 | EXG2          |
| YLR386W                                          | VAC14         | YML115C                 | VAN1          |
| YBR031W                                          | RPL4A         | YGL246C                 | RAI1          |
| YPL121C                                          | MEI5          | YHR079C-A               | SAE3          |
| YMR199W                                          | CLN1          | YOR008C                 | SLG1          |
| YGL163C                                          | RAD54         | YBR036C                 | CSG2          |
| YOR327C                                          | SNC2          | YOL081W                 | IRA2          |
| YKL010C                                          | UFD4          | YBL047C                 | EDE1          |
| YGL115W                                          | SNF4          | YDL006W                 | PTC1          |
| YMR039C                                          | SUB1          | YPR120C                 | CLB5          |
| YPR084W                                          | YPR084W       | YDR245W                 | MNN10         |
| YER116C                                          | SLX8          | YHR081W                 | LRP1          |
| YGL215W                                          | CLG1          | YKL041W                 | VPS24         |
| YGL147C                                          | RPL9A         | YPL037C                 | EGD1          |
| YNL069C                                          | RPL16B        | YOR327C                 | SNC2          |
| YOR112W                                          | CEX1          | YGL223C                 | COG1          |
| YKR057W                                          | RPS21A        | YJL095W                 | BCK1          |
| YGL148W                                          | ARO2          | YDR310C                 | SUM1          |
| YML095C                                          | RAD10         | YHR200W                 | RPN10         |
| YLR292C                                          | SEC72         | YOR127W                 | RGA1          |

| Predictions at threshold level 0.75 continued... |               |                         |               |
|--------------------------------------------------|---------------|-------------------------|---------------|
| Gene1 of predicted pair                          |               | Gene2 of predicted pair |               |
| Systematic Name                                  | Standard Name | Systematic Name         | Standard Name |
| YJL124C                                          | LSM1          | YDL002C                 | NHP10         |
| YPL253C                                          | VIK1          | YMR109W                 | MYO5          |
| YKL126W                                          | YPK1          | YPL057C                 | SUR1          |
| YGL078C                                          | DBP3          | YNL032W                 | SIW14         |
| YBR108W                                          | YBR108W       | YJR135C                 | MCM22         |
| YPL253C                                          | VIK1          | YDR378C                 | LSM6          |
| YLR371W                                          | ROM2          | YMR214W                 | SCJ1          |
| YKR061W                                          | KTR2          | YPL152W                 | RRD2          |
| YDL184C                                          | RPL41A        | YBL103C                 | RTG3          |
| YDR378C                                          | LSM6          | YGR135W                 | PRE9          |
| YKR001C                                          | VPS1          | YOR014W                 | RTS1          |
| YJL058C                                          | BIT61         | YBR215W                 | HPC2          |
| YGL025C                                          | PGD1          | YPR046W                 | MCM16         |
| YMR179W                                          | SPT21         | YLR429W                 | CRN1          |
| YBR107C                                          | IML3          | YJR032W                 | CPR7          |
| YJR125C                                          | ENT3          | YNR006W                 | VPS27         |
| YLR360W                                          | VPS38         | YDL077C                 | VAM6          |
| YDL154W                                          | MSH5          | YPR119W                 | CLB2          |
| YDR156W                                          | RPA14         | YNL106C                 | INP52         |
| YNL243W                                          | SLA2          | YIL034C                 | CAP2          |
| YOR043W                                          | WHI2          | YEL053C                 | MAK10         |
| YMR172W                                          | HOT1          | YHR178W                 | STB5          |
| YDR477W                                          | SNF1          | YPL195W                 | APL5          |
| YLR288C                                          | MEC3          | YLR435W                 | TSR2          |
| YLR381W                                          | CTF3          | YGL003C                 | CDH1          |
| YNL106C                                          | INP52         | YJR063W                 | RPA12         |
| YHR178W                                          | STB5          | YIL008W                 | URM1          |
| YGR108W                                          | CLB1          | YDR310C                 | SUM1          |
| YLR254C                                          | NDL1          | YML112W                 | CTK3          |



| Predictions at threshold level 0.75 continued... |               |                         |               |
|--------------------------------------------------|---------------|-------------------------|---------------|
| Gene1 of predicted pair                          |               | Gene2 of predicted pair |               |
| Systematic Name                                  | Standard Name | Systematic Name         | Standard Name |
| YOR038C                                          | HIR2          | YOR368W                 | RAD17         |
| YOR337W                                          | TEA1          | YMR230W                 | RPS10B        |
| YLR292C                                          | SEC72         | YGR188C                 | BUB1          |
| YFR043C                                          | IRC6          | YLR248W                 | RCK2          |
| YGL212W                                          | VAM7          | YLR398C                 | SKI2          |
| YFL003C                                          | MSH4          | YDL154W                 | MSH5          |
| YPR046W                                          | MCM16         | YLR032W                 | RAD5          |
| YBL019W                                          | APN2          | YMR038C                 | CCS1          |
| YLL026W                                          | HSP104        | YNL041C                 | COG6          |
| YBR131W                                          | CCZ1          | YMR004W                 | MVP1          |
| YGL151W                                          | NUT1          | YGL124C                 | MON1          |
| YIL159W                                          | BNR1          | YBR030W                 | YBR030W       |
| YNL032W                                          | SIW14         | YDR310C                 | SUM1          |
| YMR142C                                          | RPL13B        | YER162C                 | RAD4          |
| YDL101C                                          | DUN1          | YNL016W                 | PUB1          |
| YKL139W                                          | CTK1          | YDR318W                 | MCM21         |
| YNL054W                                          | VAC7          | YLR182W                 | SWI6          |
| YNL087W                                          | TCB2          | YGL115W                 | SNF4          |
| YML103C                                          | NUP188        | YJR059W                 | PTK2          |
| YPL129W                                          | TAF14         | YOL018C                 | TLG2          |
| YPL001W                                          | HAT1          | YDR076W                 | RAD55         |
| YGL147C                                          | RPL9A         | YER139C                 | YER139C       |
| YPL120W                                          | VPS30         | YER122C                 | GLO3          |
| YDR202C                                          | RAV2          | YNL107W                 | YAF9          |
| YBL102W                                          | SFT2          | YOR106W                 | VAM3          |
| YDR507C                                          | GIN4          | YHR152W                 | SPO12         |
| YHR012W                                          | VPS29         | YBR283C                 | SSH1          |
| YPL115C                                          | BEM3          | YGL087C                 | MMS2          |
| YBR194W                                          | SOY1          | YHL031C                 | GOS1          |

| Predictions at threshold level 0.75 continued... |               |                         |               |
|--------------------------------------------------|---------------|-------------------------|---------------|
| Gene1 of predicted pair                          |               | Gene2 of predicted pair |               |
| Systematic Name                                  | Standard Name | Systematic Name         | Standard Name |
| YDR146C                                          | SWI5          | YOL051W                 | GAL11         |
| YJL124C                                          | LSM1          | YOR368W                 | RAD17         |
| YPL137C                                          | GIP3          | YDL077C                 | VAM6          |
| YBL047C                                          | EDE1          | YKR001C                 | VPS1          |
| YNL041C                                          | COG6          | YOL018C                 | TLG2          |
| YNL206C                                          | RTT106        | YKL101W                 | HSL1          |
| YBR173C                                          | UMP1          | YGL003C                 | CDH1          |
| YJR058C                                          | APS2          | YOR035C                 | SHE4          |
| YHR081W                                          | LRP1          | YJL095W                 | BCK1          |
| YGL087C                                          | MMS2          | YGR270W                 | YTA7          |
| YIL034C                                          | CAP2          | YBR114W                 | RAD16         |
| YLR234W                                          | TOP3          | YJL190C                 | RPS22A        |
| YBR057C                                          | MUM2          | YOR035C                 | SHE4          |
| YJL176C                                          | SWI3          | YOL081W                 | IRA2          |
| YMR142C                                          | RPL13B        | YBR280C                 | SAF1          |
| YCR084C                                          | TUP1          | YKL181W                 | PRS1          |
| YMR016C                                          | SOK2          | YOR066W                 | MSA1          |
| YLR429W                                          | CRN1          | YPL018W                 | CTF19         |
| YNL201C                                          | PSY2          | YNL215W                 | IES2          |
| YBR228W                                          | SLX1          | YPL079W                 | RPL21B        |
| YDR477W                                          | SNF1          | YML062C                 | MFT1          |
| YDL020C                                          | RPN4          | YNL291C                 | MID1          |
| YDR192C                                          | NUP42         | YBL079W                 | NUP170        |
| YCR020C-A                                        | MAK31         | YMR004W                 | MVP1          |
| YDR320C                                          | SWA2          | YOL018C                 | TLG2          |
| YMR199W                                          | CLN1          | YOR358W                 | HAP5          |
| YHL031C                                          | GOS1          | YJR060W                 | CBF1          |
| YDR507C                                          | GIN4          | YBR267W                 | REI1          |
| YNL223W                                          | ATG4          | YPR119W                 | CLB2          |

| Predictions at threshold level 0.75 continued... |               |                         |               |
|--------------------------------------------------|---------------|-------------------------|---------------|
| Gene1 of predicted pair                          |               | Gene2 of predicted pair |               |
| Systematic Name                                  | Standard Name | Systematic Name         | Standard Name |
| YLR292C                                          | SEC72         | YLR360W                 | VPS38         |
| YKR072C                                          | SIS2          | YBR082C                 | UBC4          |
| YGL147C                                          | RPL9A         | YHR060W                 | VMA22         |
| YPR018W                                          | RLF2          | YDR227W                 | SIR4          |
| YBL067C                                          | UBP13         | YLR425W                 | TUS1          |
| YDR146C                                          | SWI5          | YOR014W                 | RTS1          |
| YBL051C                                          | PIN4          | YMR127C                 | SAS2          |
| YPL161C                                          | BEM4          | YJR090C                 | GRR1          |
| YDL223C                                          | HBT1          | YBL047C                 | EDE1          |
| YJL124C                                          | LSM1          | YDR200C                 | VPS64         |
| YER087C-B                                        | SBH1          | YLR055C                 | SPT8          |
| YMR202W                                          | ERG2          | YJL006C                 | CTK2          |
| YBR228W                                          | SLX1          | YBR082C                 | UBC4          |
| YOR080W                                          | DIA2          | YNL107W                 | YAF9          |
| YEL042W                                          | GDA1          | YDR310C                 | SUM1          |
| YBL079W                                          | NUP170        | YKL068W                 | NUP100        |
| YPL037C                                          | EGD1          | YMR230W                 | RPS10B        |
| YDR335W                                          | MSN5          | YFR030W                 | MET10         |
| YMR026C                                          | PEX12         | YDL083C                 | RPS16B        |
| YNL307C                                          | MCK1          | YNL041C                 | COG6          |
| YLR119W                                          | SRN2          | YLR320W                 | MMS22         |
| YDR507C                                          | GIN4          | YER027C                 | GAL83         |
| YBR274W                                          | CHK1          | YBR195C                 | MSI1          |
| YMR004W                                          | MVP1          | YNL051W                 | COG5          |
| YOR195W                                          | SLK19         | YDL226C                 | GCS1          |
| YBR108W                                          | YBR108W       | YLR447C                 | VMA6          |
| YPL253C                                          | VIK1          | YNL225C                 | CNM67         |
| YNL325C                                          | FIG4          | YOR290C                 | SNF2          |
| YLR360W                                          | VPS38         | YNL051W                 | COG5          |

| Predictions at threshold level 0.75 continued... |               |                         |               |
|--------------------------------------------------|---------------|-------------------------|---------------|
| Gene1 of predicted pair                          |               | Gene2 of predicted pair |               |
| Systematic Name                                  | Standard Name | Systematic Name         | Standard Name |
| YDR080W                                          | VPS41         | YDR323C                 | PEP7          |
| YBR173C                                          | UMP1          | YBL103C                 | RTG3          |
| YBL102W                                          | SFT2          | YNL238W                 | KEX2          |
| YDL184C                                          | RPL41A        | YDL077C                 | VAM6          |
| YDR378C                                          | LSM6          | YNL107W                 | YAF9          |
| YJR035W                                          | RAD26         | YOR014W                 | RTS1          |
| YKL160W                                          | ELF1          | YNL236W                 | SIN4          |
| YLR170C                                          | APS1          | YPR029C                 | APL4          |
| YAL024C                                          | LTE1          | YGR270W                 | YTA7          |
| YDL020C                                          | RPN4          | YBR290W                 | BSD2          |
| YDR440W                                          | DOT1          | YNL107W                 | YAF9          |
| YHR039C-A                                        | VMA10         | YNL238W                 | KEX2          |
| YBR036C                                          | CSG2          | YMR214W                 | SCJ1          |
| YDL005C                                          | MED2          | YKR048C                 | NAP1          |
| YMR026C                                          | PEX12         | YKR035W-A               | DID2          |
| YER158C                                          | YER158C       | YAR014C                 | BUD14         |
| YBR030W                                          | YBR030W       | YER162C                 | RAD4          |
| YEL050C                                          | RML2          | YDR200C                 | VPS64         |
| YML115C                                          | VAN1          | YDL192W                 | ARF1          |
| YCR034W                                          | FEN1          | YMR167W                 | MLH1          |
| YPL046C                                          | ELC1          | YJR052W                 | RAD7          |
| YMR311C                                          | GLC8          | YOR014W                 | RTS1          |
| YBL021C                                          | HAP3          | YKL048C                 | ELM1          |
| YDR137W                                          | RGP1          | YKL160W                 | ELF1          |
| YKR020W                                          | VPS51         | YBL072C                 | RPS8A         |
| YGL087C                                          | MMS2          | YJR135C                 | MCM22         |
| YPR036W                                          | VMA13         | YHR081W                 | LRP1          |
| YGL003C                                          | CDH1          | YDL226C                 | GCS1          |
| YPL042C                                          | SSN3          | YEL050C                 | RML2          |

| Predictions at threshold level 0.75 continued... |               |                         |               |
|--------------------------------------------------|---------------|-------------------------|---------------|
| Gene1 of predicted pair                          |               | Gene2 of predicted pair |               |
| Systematic Name                                  | Standard Name | Systematic Name         | Standard Name |
| YPL057C                                          | SUR1          | YHR200W                 | RPN10         |
| YJR056C                                          | YJR056C       | YNL238W                 | KEX2          |
| YDR156W                                          | RPA14         | YNL307C                 | MCK1          |
| YPR051W                                          | MAK3          | YEL056W                 | HAT2          |
| YMR127C                                          | SAS2          | YJR135C                 | MCM22         |
| YPR017C                                          | DSS4          | YCL037C                 | SRO9          |
| YKL116C                                          | PRR1          | YER139C                 | YER139C       |
| YNL297C                                          | MON2          | YMR054W                 | STV1          |
| YKR099W                                          | BAS1          | YLR452C                 | SST2          |
| YPL022W                                          | RAD1          | YJL124C                 | LSM1          |
| YGL147C                                          | RPL9A         | YJL172W                 | CPS1          |
| YNL329C                                          | PEX6          | YBL101C                 | ECM21         |
| YDR469W                                          | SDC1          | YJL140W                 | RPB4          |
| YLR090W                                          | XDJ1          | YER144C                 | UBP5          |
| YBR126C                                          | TPS1          | YJL172W                 | CPS1          |
| YGR270W                                          | YTA7          | YIR005W                 | IST3          |
| YDR153C                                          | ENT5          | YDL137W                 | ARF2          |
| YML028W                                          | TSA1          | YBR082C                 | UBC4          |
| YER144C                                          | UBP5          | YMR133W                 | REC114        |
| YER116C                                          | SLX8          | YPL057C                 | SUR1          |
| YJL183W                                          | MNN11         | YMR214W                 | SCJ1          |
| YEL027W                                          | CUP5          | YJL183W                 | MNN11         |
| YDL002C                                          | NHP10         | YGL151W                 | NUT1          |
| YCR020C-A                                        | MAK31         | YKR020W                 | VPS51         |
| YPL105C                                          | YPL105C       | YJL004C                 | SYS1          |
| YBL088C                                          | TEL1          | YJL106W                 | IME2          |
| YGL174W                                          | BUD13         | YDR469W                 | SDC1          |
| YHR061C                                          | GIC1          | YCR086W                 | CSM1          |
| YGR270W                                          | YTA7          | YFR036W                 | CDC26         |

| Predictions at threshold level 0.75 continued... |               |                         |               |
|--------------------------------------------------|---------------|-------------------------|---------------|
| Gene1 of predicted pair                          |               | Gene2 of predicted pair |               |
| Systematic Name                                  | Standard Name | Systematic Name         | Standard Name |
| YLR079W                                          | SIC1          | YJL124C                 | LSM1          |
| YKL025C                                          | PAN3          | YBR200W                 | BEM1          |
| YCR020C-A                                        | MAK31         | YBL102W                 | SFT2          |
| YJR099W                                          | YUH1          | YLR306W                 | UBC12         |
| YLR079W                                          | SIC1          | YKL139W                 | CTK1          |
| YLR386W                                          | VAC14         | YDR155C                 | CPR1          |
| YOR047C                                          | STD1          | YDR477W                 | SNF1          |
| YML102W                                          | CAC2          | YGL163C                 | RAD54         |
| YCR020C-A                                        | MAK31         | YEL051W                 | VMA8          |
| YDL184C                                          | RPL41A        | YDR358W                 | GGA1          |
| YOR337W                                          | TEA1          | YEL060C                 | PRB1          |
| YIL076W                                          | SEC28         | YHR200W                 | RPN10         |
| YLR058C                                          | SHM2          | YBR107C                 | IML3          |
| YLR324W                                          | PEX30         | YMR204C                 | INP1          |
| YLR381W                                          | CTF3          | YJL183W                 | MNN11         |
| YBR108W                                          | YBR108W       | YLR370C                 | ARC18         |
| YMR205C                                          | PFK2          | YDR245W                 | MNN10         |
| YHR012W                                          | VPS29         | YCR086W                 | CSM1          |
| YBR131W                                          | CCZ1          | YPL161C                 | BEM4          |
| YER143W                                          | DDI1          | YOL018C                 | TLG2          |
| YLR094C                                          | GIS3          | YLR093C                 | NYV1          |
| YOL030W                                          | GAS5          | YJR035W                 | RAD26         |
| YJL154C                                          | VPS35         | YDL155W                 | CLB3          |
| YBR173C                                          | UMP1          | YMR230W                 | RPS10B        |
| YDR329C                                          | PEX3          | YDR265W                 | PEX10         |
| YKL116C                                          | PRR1          | YGL003C                 | CDH1          |
| YLR370C                                          | ARC18         | YDL226C                 | GCS1          |
| YMR198W                                          | CIK1          | YDR254W                 | CHL4          |
| YGL060W                                          | YBP2          | YPL106C                 | SSE1          |

| Predictions at threshold level 0.75 continued... |               |                         |               |
|--------------------------------------------------|---------------|-------------------------|---------------|
| Gene1 of predicted pair                          |               | Gene2 of predicted pair |               |
| Systematic Name                                  | Standard Name | Systematic Name         | Standard Name |
| YOR043W                                          | WHI2          | YDL006W                 | PTC1          |
| YEL044W                                          | IES6          | YMR089C                 | YTA12         |
| YKR001C                                          | VPS1          | YHR039C-A               | VMA10         |
| YOL111C                                          | MDY2          | YDL077C                 | VAM6          |
| YBL103C                                          | RTG3          | YIL133C                 | RPL16A        |
| YBR057C                                          | MUM2          | YPL057C                 | SUR1          |
| YHR012W                                          | VPS29         | YGR188C                 | BUB1          |
| YML095C                                          | RAD10         | YBL087C                 | RPL23A        |
| YGL025C                                          | PGD1          | YER122C                 | GLO3          |
| YPR084W                                          | YPR084W       | YNL025C                 | SSN8          |
| YDR137W                                          | RGP1          | YDR207C                 | UME6          |
| YBR019C                                          | GAL10         | YER122C                 | GLO3          |
| YBL008W                                          | HIR1          | YDR225W                 | HTA1          |
| YLR399C                                          | BDF1          | YDR289C                 | RTT103        |
| YLR095C                                          | IOC2          | YDR137W                 | RGP1          |
| YOR080W                                          | DIA2          | YML095C                 | RAD10         |
| YNL025C                                          | SSN8          | YER139C                 | YER139C       |
| YPL057C                                          | SUR1          | YBR036C                 | CSG2          |
| YDL223C                                          | HBT1          | YNL307C                 | MCK1          |
| YPL022W                                          | RAD1          | YLR381W                 | CTF3          |
| YJL176C                                          | SWI3          | YHR167W                 | THP2          |
| YBR107C                                          | IML3          | YCR086W                 | CSM1          |
| YDL175C                                          | AIR2          | YDR378C                 | LSM6          |
| YLR452C                                          | SST2          | YOL081W                 | IRA2          |
| YLR371W                                          | ROM2          | YOR014W                 | RTS1          |
| YFR031C-A                                        | RPL2A         | YHR060W                 | VMA22         |
| YLR234W                                          | TOP3          | YER162C                 | RAD4          |
| YDL052C                                          | SLC1          | YOR059C                 | YOR059C       |
| YOR083W                                          | WHI5          | YML095C                 | RAD10         |

| Predictions at threshold level 0.75 continued... |               |                         |               |
|--------------------------------------------------|---------------|-------------------------|---------------|
| Gene1 of predicted pair                          |               | Gene2 of predicted pair |               |
| Systematic Name                                  | Standard Name | Systematic Name         | Standard Name |
| YDL006W                                          | PTC1          | YDL192W                 | ARF1          |
| YML012W                                          | ERV25         | YKR014C                 | YPT52         |
| YPR131C                                          | NAT3          | YGL003C                 | CDH1          |
| YGR188C                                          | BUB1          | YPR119W                 | CLB2          |
| YOR195W                                          | SLK19         | YDR260C                 | SWM1          |
| YLL039C                                          | UBI4          | YJL006C                 | CTK2          |
| YGL135W                                          | RPL1B         | YKR014C                 | YPT52         |
| YDR448W                                          | ADA2          | YNL107W                 | YAF9          |
| YKL048C                                          | ELM1          | YDR254W                 | CHL4          |
| YIL151C                                          | YIL151C       | YPL240C                 | HSP82         |
| YPL024W                                          | RMI1          | YDL155W                 | CLB3          |
| YJL149W                                          | YJL149W       | YML088W                 | UFO1          |
| YMR055C                                          | BUB2          | YGL253W                 | HXK2          |
| YNL297C                                          | MON2          | YPL161C                 | BEM4          |
| YIL053W                                          | RHR2          | YMR153W                 | NUP53         |
| YKL002W                                          | DID4          | YKL041W                 | VPS24         |
| YLR090W                                          | XDJ1          | YLR093C                 | NYV1          |
| YNL016W                                          | PUB1          | YCR086W                 | CSM1          |
| YMR004W                                          | MVP1          | YDL077C                 | VAM6          |
| YLR399C                                          | BDF1          | YOL054W                 | PSH1          |
| YPL213W                                          | LEA1          | YJL183W                 | MNN11         |
| YDR004W                                          | RAD57         | YDR146C                 | SWI5          |
| YMR192W                                          | GYL1          | YBR108W                 | YBR108W       |
| YKL116C                                          | PRR1          | YPR046W                 | MCM16         |
| YKL032C                                          | IXR1          | YIL008W                 | URM1          |
| YMR198W                                          | CIK1          | YOR141C                 | ARP8          |
| YDR137W                                          | RGP1          | YNL307C                 | MCK1          |
| YLR119W                                          | SRN2          | YER139C                 | YER139C       |
| YBR290W                                          | BSD2          | YMR055C                 | BUB2          |



| Predictions at threshold level 0.75 continued... |               |                         |               |
|--------------------------------------------------|---------------|-------------------------|---------------|
| Gene1 of predicted pair                          |               | Gene2 of predicted pair |               |
| Systematic Name                                  | Standard Name | Systematic Name         | Standard Name |
| YKL117W                                          | SBA1          | YML057W                 | CMP2          |
| YMR026C                                          | PEX12         | YMR142C                 | RPL13B        |
| YPL024W                                          | RMI1          | YGL066W                 | SGF73         |
| YFR031C-A                                        | RPL2A         | YOR132W                 | VPS17         |
| YLR337C                                          | VRP1          | YAR014C                 | BUD14         |
| YHR081W                                          | LRP1          | YOL121C                 | RPS19A        |
| YLR410W                                          | VIP1          | YLR306W                 | UBC12         |
| YIL148W                                          | RPL40A        | YNL199C                 | GCR2          |
| YGR188C                                          | BUB1          | YDR207C                 | UME6          |
| YLR090W                                          | XDJ1          | YOL121C                 | RPS19A        |
| YER144C                                          | UBP5          | YCR053W                 | THR4          |
| YJL004C                                          | SYS1          | YNL051W                 | COG5          |
| YMR224C                                          | MRE11         | YHR200W                 | RPN10         |
| YBR200W                                          | BEM1          | YMR199W                 | CLN1          |
| YFR010W                                          | UBP6          | YPL253C                 | VIK1          |
| YMR038C                                          | CCS1          | YML028W                 | TSA1          |
| YDR004W                                          | RAD57         | YMR039C                 | SUB1          |
| YDR176W                                          | NGG1          | YPL248C                 | GAL4          |
| YGL212W                                          | VAM7          | YJR033C                 | RAV1          |
| YER040W                                          | GLN3          | YDR207C                 | UME6          |
| YNL215W                                          | IES2          | YOR213C                 | SAS5          |
| YJL154C                                          | VPS35         | YOR035C                 | SHE4          |
| YOR069W                                          | VPS5          | YPL161C                 | BEM4          |
| YJL124C                                          | LSM1          | YOR043W                 | WHI2          |
| YPR051W                                          | MAK3          | YDR153C                 | ENT5          |
| YLR381W                                          | CTF3          | YOR358W                 | HAP5          |
| YBR108W                                          | YBR108W       | YKL126W                 | YPK1          |
| YLR447C                                          | VMA6          | YKR020W                 | VPS51         |
| YPR036W                                          | VMA13         | YKL048C                 | ELM1          |

| Predictions at threshold level 0.75 continued... |               |                         |               |
|--------------------------------------------------|---------------|-------------------------|---------------|
| Gene1 of predicted pair                          |               | Gene2 of predicted pair |               |
| Systematic Name                                  | Standard Name | Systematic Name         | Standard Name |
| YOL051W                                          | GAL11         | YNR023W                 | SNF12         |
| YKL010C                                          | UFD4          | YPL161C                 | BEM4          |
| YMR199W                                          | CLN1          | YGR059W                 | SPR3          |
| YLR337C                                          | VRP1          | YER139C                 | YER139C       |
| YJL183W                                          | MNN11         | YBL025W                 | RRN10         |
| YLR234W                                          | TOP3          | YMR167W                 | MLH1          |
| YBR112C                                          | CYC8          | YCR084C                 | TUP1          |
| YOR195W                                          | SLK19         | YBL087C                 | RPL23A        |
| YGR261C                                          | APL6          | YHR039C-A               | VMA10         |
| YJL036W                                          | SNX4          | YOL108C                 | INO4          |
| YNL025C                                          | SSN8          | YER122C                 | GLO3          |
| YMR198W                                          | CIK1          | YBL047C                 | EDE1          |
| YER161C                                          | SPT2          | YER122C                 | GLO3          |
| YGR105W                                          | VMA21         | YPL120W                 | VPS30         |
| YOR080W                                          | DIA2          | YJL187C                 | SWE1          |
| YDR146C                                          | SWI5          | YBR260C                 | RGD1          |
| YBR200W                                          | BEM1          | YER044C                 | ERG28         |
| YBL079W                                          | NUP170        | YGL016W                 | KAP122        |
| YHR157W                                          | REC104        | YHL022C                 | SPO11         |
| YJR084W                                          | CSN12         | YJL095W                 | BCK1          |
| YPR120C                                          | CLB5          | YGL252C                 | RTG2          |
| YDR293C                                          | SSD1          | YNL044W                 | YIP3          |
| YMR202W                                          | ERG2          | YDR318W                 | MCM21         |
| YPL253C                                          | VIK1          | YLR371W                 | ROM2          |
| YLL007C                                          | YLL007C       | YER110C                 | KAP123        |
| YOR076C                                          | SKI7          | YLR398C                 | SKI2          |
| YBR107C                                          | IML3          | YAR014C                 | BUD14         |
| YPL115C                                          | BEM3          | YBR171W                 | SEC66         |
| YER044C                                          | ERG28         | YLR180W                 | SAM1          |

| Predictions at threshold level 0.75 continued... |               |                         |               |
|--------------------------------------------------|---------------|-------------------------|---------------|
| Gene1 of predicted pair                          |               | Gene2 of predicted pair |               |
| Systematic Name                                  | Standard Name | Systematic Name         | Standard Name |
| YNR052C                                          | POP2          | YKL110C                 | KTI12         |
| YKR020W                                          | VPS51         | YHR115C                 | DMA1          |
| YPR036W                                          | VMA13         | YLR320W                 | MMS22         |
| YMR133W                                          | REC114        | YDL192W                 | ARF1          |
| YLR337C                                          | VRP1          | YEL036C                 | ANP1          |
| YMR016C                                          | SOK2          | YNR072W                 | HXT17         |
| YDR245W                                          | MNN10         | YPL089C                 | RLM1          |
| YNL201C                                          | PSY2          | YLR381W                 | CTF3          |
| YIL034C                                          | CAP2          | YDR389W                 | SAC7          |
| YML115C                                          | VAN1          | YFR036W                 | CDC26         |
| YJR059W                                          | PTK2          | YMR273C                 | ZDS1          |
| YLR386W                                          | VAC14         | YOR035C                 | SHE4          |
| YHR084W                                          | STE12         | YBL016W                 | FUS3          |
| YDL101C                                          | DUN1          | YBL088C                 | TEL1          |
| YGL250W                                          | RMR1          | YGL019W                 | CKB1          |
| YCR024C-A                                        | PMP1          | YMR273C                 | ZDS1          |
| YLR119W                                          | SRN2          | YMR133W                 | REC114        |
| YDR378C                                          | LSM6          | YJL183W                 | MNN11         |
| YMR109W                                          | MYO5          | YCR086W                 | CSM1          |
| YMR198W                                          | CIK1          | YJL006C                 | CTK2          |
| YHR134W                                          | WSS1          | YGL253W                 | HXK2          |
| YJR033C                                          | RAV1          | YDR207C                 | UME6          |
| YOR213C                                          | SAS5          | YER139C                 | YER139C       |
| YPL220W                                          | RPL1A         | YKR026C                 | GCN3          |
| YDR363W-A                                        | SEM1          | YNL236W                 | SIN4          |
| YHR039C-A                                        | VMA10         | YGL124C                 | MON1          |
| YLR288C                                          | MEC3          | YGR081C                 | SLX9          |
| YFR010W                                          | UBP6          | YLR182W                 | SWI6          |
| YCL037C                                          | SRO9          | YEL053C                 | MAK10         |

| Predictions at threshold level 0.75 continued... |               |                         |               |
|--------------------------------------------------|---------------|-------------------------|---------------|
| Gene1 of predicted pair                          |               | Gene2 of predicted pair |               |
| Systematic Name                                  | Standard Name | Systematic Name         | Standard Name |
| YLR192C                                          | HCR1          | YHR081W                 | LRP1          |
| YGR020C                                          | VMA7          | YJR060W                 | CBF1          |
| YBR171W                                          | SEC66         | YCR086W                 | CSM1          |
| YJR140C                                          | HIR3          | YJR032W                 | CPR7          |
| YOR069W                                          | VPS5          | YDR202C                 | RAV2          |
| YKL032C                                          | IXR1          | YKL041W                 | VPS24         |
| YCR024C-A                                        | PMP1          | YML057W                 | CMP2          |
| YOR132W                                          | VPS17         | YLR381W                 | CTF3          |
| YBR171W                                          | SEC66         | YNL041C                 | COG6          |
| YBR108W                                          | YBR108W       | YHR200W                 | RPN10         |
| YPL234C                                          | TFP3          | YNL041C                 | COG6          |
| YLR170C                                          | APS1          | YHL019C                 | APM2          |
| YMR224C                                          | MRE11         | YER122C                 | GLO3          |
| YGL237C                                          | HAP2          | YEL053C                 | MAK10         |
| YHR134W                                          | WSS1          | YOL030W                 | GAS5          |
| YCR020C-A                                        | MAK31         | YJL053W                 | PEP8          |
| YKL048C                                          | ELM1          | YER122C                 | GLO3          |
| YLR288C                                          | MEC3          | YGL148W                 | ARO2          |
| YBR200W                                          | BEM1          | YMR311C                 | GLC8          |
| YLR079W                                          | SIC1          | YKR061W                 | KTR2          |
| YGL190C                                          | CDC55         | YPL152W                 | RRD2          |
| YKR059W                                          | TIF1          | YGL019W                 | CKB1          |
| YKR099W                                          | BAS1          | YER040W                 | GLN3          |
| YBR131W                                          | CCZ1          | YGR135W                 | PRE9          |
| YER114C                                          | BOI2          | YDR309C                 | GIC2          |
| YOR112W                                          | CEX1          | YCR066W                 | RAD18         |
| YPL024W                                          | RMI1          | YNL076W                 | MKS1          |
| YMR142C                                          | RPL13B        | YHR200W                 | RPN10         |
| YOR332W                                          | VMA4          | YDR137W                 | RGP1          |

| Predictions at threshold level 0.75 continued... |               |                         |               |
|--------------------------------------------------|---------------|-------------------------|---------------|
| Gene1 of predicted pair                          |               | Gene2 of predicted pair |               |
| Systematic Name                                  | Standard Name | Systematic Name         | Standard Name |
| YGL095C                                          | VPS45         | YJL164C                 | TPK1          |
| YKR099W                                          | BAS1          | YDL192W                 | ARF1          |
| YFL026W                                          | STE2          | YOR109W                 | INP53         |
| YAR014C                                          | BUD14         | YDR207C                 | UME6          |
| YML115C                                          | VAN1          | YEL060C                 | PRB1          |
| YCL037C                                          | SRO9          | YER120W                 | SCS2          |
| YGR275W                                          | RTT102        | YOR290C                 | SNF2          |
| YOL018C                                          | TLG2          | YDR207C                 | UME6          |
| YJL154C                                          | VPS35         | YGR261C                 | APL6          |
| YHR052W                                          | CIC1          | YER105C                 | NUP157        |
| YFR036W                                          | CDC26         | YML071C                 | COG8          |
| YDR329C                                          | PEX3          | YDR142C                 | PEX7          |
| YMR224C                                          | MRE11         | YKR095W                 | MLP1          |
| YDR080W                                          | VPS41         | YGL124C                 | MON1          |
| YHR156C                                          | LIN1          | YER044C                 | ERG28         |
| YBR278W                                          | DPB3          | YBR274W                 | CHK1          |
| YLR337C                                          | VRP1          | YKL126W                 | YPK1          |
| YFR031C-A                                        | RPL2A         | YPL234C                 | TFP3          |
| YKL101W                                          | HSL1          | YGL031C                 | RPL24A        |
| YHR013C                                          | ARD1          | YPR046W                 | MCM16         |
| YHR156C                                          | LIN1          | YPL195W                 | APL5          |
| YKL139W                                          | CTK1          | YNL225C                 | CNM67         |
| YBR126C                                          | TPS1          | YMR152W                 | YIM1          |
| YNL248C                                          | RPA49         | YGR270W                 | YTA7          |
| YJL154C                                          | VPS35         | YBR260C                 | RGD1          |
| YDR004W                                          | RAD57         | YJR090C                 | GRR1          |
| YPL037C                                          | EGD1          | YEL053C                 | MAK10         |
| YLR192C                                          | HCR1          | YLR398C                 | SKI2          |
| YMR016C                                          | SOK2          | YPL161C                 | BEM4          |

| Predictions at threshold level 0.75 continued... |               |                         |               |
|--------------------------------------------------|---------------|-------------------------|---------------|
| Gene1 of predicted pair                          |               | Gene2 of predicted pair |               |
| Systematic Name                                  | Standard Name | Systematic Name         | Standard Name |
| YOR106W                                          | VAM3          | YER096W                 | SHC1          |
| YMR095C                                          | SNO1          | YPL037C                 | EGD1          |
| YLR064W                                          | YLR064W       | YHR114W                 | BZZ1          |
| YHR111W                                          | UBA4          | YNL079C                 | TPM1          |
| YHR060W                                          | VMA22         | YNL076W                 | MKS1          |
| YGL066W                                          | SGF73         | YJR135C                 | MCM22         |
| YBR290W                                          | BSD2          | YAL002W                 | VPS8          |
| YJL124C                                          | LSM1          | YOL090W                 | MSH2          |
| YHR178W                                          | STB5          | YPL253C                 | VIK1          |
| YBL058W                                          | SHP1          | YDR477W                 | SNF1          |
| YNL058C                                          | YNL058C       | YOR066W                 | MSA1          |
| YDR174W                                          | HMO1          | YHR013C                 | ARD1          |
| YDR254W                                          | CHL4          | YDR318W                 | MCM21         |
| YGL060W                                          | YBP2          | YPR131C                 | NAT3          |
| YPR084W                                          | YPR084W       | YPL037C                 | EGD1          |
| YOL111C                                          | MDY2          | YPL137C                 | GIP3          |
| YGL115W                                          | SNF4          | YOR327C                 | SNC2          |
| YEL065W                                          | SIT1          | YOR337W                 | TEA1          |
| YBR173C                                          | UMP1          | YKR035W-A               | DID2          |
| YJR056C                                          | YJR056C       | YBL085W                 | BOI1          |
| YBR108W                                          | YBR108W       | YMR230W                 | RPS10B        |
| YNL215W                                          | IES2          | YPL253C                 | VIK1          |
| YGL212W                                          | VAM7          | YNL076W                 | MKS1          |
| YOR358W                                          | HAP5          | YPL246C                 | RBD2          |
| YMR026C                                          | PEX12         | YEL053C                 | MAK10         |
| YJR056C                                          | YJR056C       | YMR152W                 | YIM1          |
| YFR010W                                          | UBP6          | YHR060W                 | VMA22         |
| YBL088C                                          | TEL1          | YPR072W                 | NOT5          |
| YDR443C                                          | SSN2          | YKR099W                 | BAS1          |

| Predictions at threshold level 0.75 continued... |               |                         |               |
|--------------------------------------------------|---------------|-------------------------|---------------|
| Gene1 of predicted pair                          |               | Gene2 of predicted pair |               |
| Systematic Name                                  | Standard Name | Systematic Name         | Standard Name |
| YPR120C                                          | CLB5          | YLR425W                 | TUS1          |
| YFR031C-A                                        | RPL2A         | YEL051W                 | VMA8          |
| YLR313C                                          | SPH1          | YLR362W                 | STE11         |
| YER162C                                          | RAD4          | YGL124C                 | MON1          |
| YOR195W                                          | SLK19         | YMR202W                 | ERG2          |
| YBL078C                                          | ATG8          | YEL013W                 | VAC8          |
| YMR205C                                          | PFK2          | YPL161C                 | BEM4          |
| YDR309C                                          | GIC2          | YGR152C                 | RSR1          |
| YAR014C                                          | BUD14         | YKR030W                 | GMH1          |
| YHR012W                                          | VPS29         | YLR371W                 | ROM2          |
| YDR108W                                          | GSG1          | YHR012W                 | VPS29         |
| YGL133W                                          | ITC1          | YDR363W-A               | SEM1          |
| YOR080W                                          | DIA2          | YGL031C                 | RPL24A        |
| YPL120W                                          | VPS30         | YNL051W                 | COG5          |
| YGL178W                                          | MPT5          | YNL271C                 | BNI1          |
| YPR017C                                          | DSS4          | YEL053C                 | MAK10         |
| YDR137W                                          | RGP1          | YDL192W                 | ARF1          |
| YNL218W                                          | MGS1          | YLR313C                 | SPH1          |
| YGR081C                                          | SLX9          | YFL023W                 | BUD27         |
| YNL243W                                          | SLA2          | YLR200W                 | YKE2          |
| YJL124C                                          | LSM1          | YDR076W                 | RAD55         |
| YBR200W                                          | BEM1          | YLR399C                 | BDF1          |
| YJR005W                                          | APL1          | YDL226C                 | GCS1          |
| YNL069C                                          | RPL16B        | YOR106W                 | VAM3          |
| YGR105W                                          | VMA21         | YLR309C                 | IMH1          |
| YDR176W                                          | NGG1          | YOR023C                 | AHC1          |
| YBL051C                                          | PIN4          | YIL008W                 | URM1          |
| YGR104C                                          | SRB5          | YBR200W                 | BEM1          |
| YDR335W                                          | MSN5          | YNL236W                 | SIN4          |

| Predictions at threshold level 0.75 continued... |               |                         |               |
|--------------------------------------------------|---------------|-------------------------|---------------|
| Gene1 of predicted pair                          |               | Gene2 of predicted pair |               |
| Systematic Name                                  | Standard Name | Systematic Name         | Standard Name |
| YBR031W                                          | RPL4A         | YOR078W                 | BUD21         |
| YKR035W-A                                        | DID2          | YLR180W                 | SAM1          |
| YOR327C                                          | SNC2          | YGL124C                 | MON1          |
| YMR016C                                          | SOK2          | YLR093C                 | NYV1          |
| YBR260C                                          | RGD1          | YHR114W                 | BZZ1          |
| YER087C-B                                        | SBH1          | YJR010C-A               | SPC1          |
| YOL111C                                          | MDY2          | YLR180W                 | SAM1          |
| YJR135C                                          | MCM22         | YCR086W                 | CSM1          |
| YMR055C                                          | BUB2          | YJL187C                 | SWE1          |
| YER115C                                          | SPR6          | YCR024C-A               | PMP1          |
| YBL047C                                          | EDE1          | YOR043W                 | WHI2          |
| YMR319C                                          | FET4          | YDR105C                 | TMS1          |
| YCL037C                                          | SRO9          | YHL020C                 | OPI1          |
| YLR095C                                          | IOC2          | YNL058C                 | YNL058C       |
| YNR072W                                          | HXT17         | YDL077C                 | VAM6          |
| YOR270C                                          | VPH1          | YGL124C                 | MON1          |
| YFL026W                                          | STE2          | YJR125C                 | ENT3          |
| YLR135W                                          | SLX4          | YMR038C                 | CCS1          |
| YJL151C                                          | SNA3          | YBR108W                 | YBR108W       |
| YLR083C                                          | EMP70         | YCR020C-A               | MAK31         |
| YGL174W                                          | BUD13         | YER161C                 | SPT2          |
| YOR327C                                          | SNC2          | YLR370C                 | ARC18         |
| YDR358W                                          | GGA1          | YDL077C                 | VAM6          |
| YKL110C                                          | KTI12         | YCR086W                 | CSM1          |
| YHR111W                                          | UBA4          | YDR155C                 | CPR1          |
| YLR216C                                          | CPR6          | YBL103C                 | RTG3          |
| YMR054W                                          | STV1          | YKL119C                 | VPH2          |
| YOR195W                                          | SLK19         | YLR381W                 | CTF3          |
| YNL058C                                          | YNL058C       | YPL195W                 | APL5          |



| Predictions at threshold level 0.75 continued... |               |                         |               |
|--------------------------------------------------|---------------|-------------------------|---------------|
| Gene1 of predicted pair                          |               | Gene2 of predicted pair |               |
| Systematic Name                                  | Standard Name | Systematic Name         | Standard Name |
| YER162C                                          | RAD4          | YNL076W                 | MKS1          |
| YDR129C                                          | SAC6          | YDR323C                 | PEP7          |
| YMR127C                                          | SAS2          | YGR252W                 | GCN5          |
| YGR270W                                          | YTA7          | YDR144C                 | MKC7          |
| YDR363W-A                                        | SEM1          | YDL155W                 | CLB3          |
| YCR066W                                          | RAD18         | YPL120W                 | VPS30         |
| YGR108W                                          | CLB1          | YOL091W                 | SPO21         |
| YOR096W                                          | RPS7A         | YBR189W                 | RPS9B         |
| YPL018W                                          | CTF19         | YOR141C                 | ARP8          |
| YGL156W                                          | AMS1          | YKL103C                 | LAP4          |
| YBR290W                                          | BSD2          | YER115C                 | SPR6          |
| YHR161C                                          | YAP1801       | YKR001C                 | VPS1          |
| YKL116C                                          | PRR1          | YMR152W                 | YIM1          |
| YKL214C                                          | YRA2          | YOR001W                 | RRP6          |
| YMR095C                                          | SNO1          | YML071C                 | COG8          |
| YIL076W                                          | SEC28         | YDL083C                 | RPS16B        |
| YOR008C                                          | SLG1          | YJL095W                 | BCK1          |
| YDR129C                                          | SAC6          | YEL036C                 | ANP1          |
| YER011W                                          | TIR1          | YPL178W                 | CBC2          |
| YHR200W                                          | RPN10         | YLR032W                 | RAD5          |
| YOR112W                                          | CEX1          | YHL020C                 | OPI1          |
| YAL024C                                          | LTE1          | YFR036W                 | CDC26         |
| YLR180W                                          | SAM1          | YDR207C                 | UME6          |
| YAL024C                                          | LTE1          | YDR383C                 | NKP1          |
| YPR017C                                          | DSS4          | YDL077C                 | VAM6          |
| YDL160C                                          | DHH1          | YOR368W                 | RAD17         |
| YAL024C                                          | LTE1          | YMR179W                 | SPT21         |
| YER143W                                          | DDI1          | YNR049C                 | MSO1          |
| YGR104C                                          | SRB5          | YNL215W                 | IES2          |

| Predictions at threshold level 0.75 continued... |               |                         |               |
|--------------------------------------------------|---------------|-------------------------|---------------|
| Gene1 of predicted pair                          |               | Gene2 of predicted pair |               |
| Systematic Name                                  | Standard Name | Systematic Name         | Standard Name |
| YOR101W                                          | RAS1          | YDL005C                 | MED2          |
| YJL036W                                          | SNX4          | YDR080W                 | VPS41         |
| YLR043C                                          | TRX1          | YIL008W                 | URM1          |
| YJL187C                                          | SWE1          | YJL095W                 | BCK1          |
| YAL024C                                          | LTE1          | YMR311C                 | GLC8          |
| YOR337W                                          | TEA1          | YJR084W                 | CSN12         |
| YPL120W                                          | VPS30         | YOR327C                 | SNC2          |
| YJR063W                                          | RPA12         | YOL081W                 | IRA2          |
| YDR443C                                          | SSN2          | YML071C                 | COG8          |
| YOR039W                                          | CKB2          | YLR435W                 | TSR2          |
| YNL041C                                          | COG6          | YPL120W                 | VPS30         |
| YDR183W                                          | PLP1          | YHR115C                 | DMA1          |
| YGL212W                                          | VAM7          | YLR452C                 | SST2          |
| YCR053W                                          | THR4          | YBR280C                 | SAF1          |
| YBR171W                                          | SEC66         | YOR035C                 | SHE4          |
| YJL124C                                          | LSM1          | YKR001C                 | VPS1          |
| YBL051C                                          | PIN4          | YKL048C                 | ELM1          |
| YMR055C                                          | BUB2          | YJL138C                 | TIF2          |
| YMR311C                                          | GLC8          | YMR230W                 | RPS10B        |
| YFR010W                                          | UBP6          | YOR035C                 | SHE4          |
| YGR249W                                          | MGA1          | YDR261C                 | EXG2          |
| YHR098C                                          | SFB3          | YOR036W                 | PEP12         |
| YKR035W-A                                        | DID2          | YJR032W                 | CPR7          |
| YGR252W                                          | GCN5          | YNL236W                 | SIN4          |
| YGL250W                                          | RMR1          | YPL018W                 | CTF19         |
| YJR063W                                          | RPA12         | YDR183W                 | PLP1          |
| YAL024C                                          | LTE1          | YPL253C                 | VIK1          |
| YJL172W                                          | CPS1          | YER139C                 | YER139C       |
| YGL033W                                          | HOP2          | YDR207C                 | UME6          |

| Predictions at threshold level 0.75 continued... |               |                         |               |
|--------------------------------------------------|---------------|-------------------------|---------------|
| Gene1 of predicted pair                          |               | Gene2 of predicted pair |               |
| Systematic Name                                  | Standard Name | Systematic Name         | Standard Name |
| YEL065W                                          | SIT1          | YBR108W                 | YBR108W       |
| YGR072W                                          | UPF3          | YOL108C                 | INO4          |
| YIL034C                                          | CAP2          | YLR233C                 | EST1          |
| YBL058W                                          | SHP1          | YDL077C                 | VAM6          |
| YLR254C                                          | NDL1          | YNL116W                 | DMA2          |
| YJR024C                                          | MDE1          | YMR164C                 | MSS11         |
| YCR065W                                          | HCM1          | YOR080W                 | DIA2          |
| YOR023C                                          | AHC1          | YHL002W                 | HSE1          |
| YCL001W                                          | RER1          | YAL002W                 | VPS8          |
| YNL206C                                          | RTT106        | YDR227W                 | SIR4          |
| YLR192C                                          | HCR1          | YBR036C                 | CSG2          |
| YAR014C                                          | BUD14         | YPR119W                 | CLB2          |
| YKR020W                                          | VPS51         | YJR032W                 | CPR7          |
| YGL135W                                          | RPL1B         | YGR133W                 | PEX4          |
| YLR386W                                          | VAC14         | YCR086W                 | CSM1          |
| YIL076W                                          | SEC28         | YPL234C                 | TFP3          |
| YMR116C                                          | ASC1          | YML115C                 | VAN1          |
| YJL095W                                          | BCK1          | YJL190C                 | RPS22A        |
| YOR039W                                          | CKB2          | YGL250W                 | RMR1          |
| YIL103W                                          | DPH1          | YAR014C                 | BUD14         |
| YGL147C                                          | RPL9A         | YIL076W                 | SEC28         |
| YKL116C                                          | PRR1          | YGL212W                 | VAM7          |
| YDL192W                                          | ARF1          | YLR370C                 | ARC18         |
| YKR072C                                          | SIS2          | YLR313C                 | SPH1          |
| YBR194W                                          | SOY1          | YOR001W                 | RRP6          |
| YPL253C                                          | VIK1          | YDR318W                 | MCM21         |
| YOR080W                                          | DIA2          | YDR378C                 | LSM6          |
| YGL087C                                          | MMS2          | YGL253W                 | HXK2          |
| YKL048C                                          | ELM1          | YGR270W                 | YTA7          |

| Predictions at threshold level 0.75 continued... |               |                         |               |
|--------------------------------------------------|---------------|-------------------------|---------------|
| Gene1 of predicted pair                          |               | Gene2 of predicted pair |               |
| Systematic Name                                  | Standard Name | Systematic Name         | Standard Name |
| YDR176W                                          | NGG1          | YLR357W                 | RSC2          |
| YBR171W                                          | SEC66         | YLR447C                 | VMA6          |
| YHR086W                                          | NAM8          | YBR119W                 | MUD1          |
| YIL159W                                          | BNR1          | YDL192W                 | ARF1          |
| YCR081W                                          | SRB8          | YOR014W                 | RTS1          |
| YGL095C                                          | VPS45         | YOR327C                 | SNC2          |
| YDR320C                                          | SWA2          | YHL031C                 | GOS1          |
| YNL325C                                          | FIG4          | YDR137W                 | RGP1          |
| YOR066W                                          | MSA1          | YMR311C                 | GLC8          |
| YKL032C                                          | IXR1          | YJL183W                 | MNN11         |
| YOR066W                                          | MSA1          | YDR261C                 | EXG2          |
| YLR360W                                          | VPS38         | YNL107W                 | YAF9          |
| YMR142C                                          | RPL13B        | YDR358W                 | GGA1          |
| YLR119W                                          | SRN2          | YKR099W                 | BAS1          |
| YBR217W                                          | ATG12         | YMR016C                 | SOK2          |
| YLR150W                                          | STM1          | YJR135C                 | MCM22         |
| YOR106W                                          | VAM3          | YHR060W                 | VMA22         |
| YJR005W                                          | APL1          | YPR046W                 | MCM16         |
| YLR135W                                          | SLX4          | YDL013W                 | SLX5          |
| YLR119W                                          | SRN2          | YPR036W                 | VMA13         |
| YHR111W                                          | UBA4          | YHR114W                 | BZZ1          |
| YFR043C                                          | IRC6          | YMR243C                 | ZRC1          |
| YJL095W                                          | BCK1          | YDR310C                 | SUM1          |
| YDR144C                                          | MKC7          | YDR183W                 | PLP1          |
| YLR234W                                          | TOP3          | YOR127W                 | RGA1          |
| YPR072W                                          | NOT5          | YLR357W                 | RSC2          |
| YBL008W                                          | HIR1          | YCR086W                 | CSM1          |
| YNL215W                                          | IES2          | YML112W                 | CTK3          |
| YLR119W                                          | SRN2          | YMR311C                 | GLC8          |

| Predictions at threshold level 0.75 continued... |               |                         |               |
|--------------------------------------------------|---------------|-------------------------|---------------|
| Gene1 of predicted pair                          |               | Gene2 of predicted pair |               |
| Systematic Name                                  | Standard Name | Systematic Name         | Standard Name |
| YJL020C                                          | BBC1          | YGL095C                 | VPS45         |
| YJR063W                                          | RPA12         | YNL116W                 | DMA2          |
| YGL066W                                          | SGF73         | YDL013W                 | SLX5          |
| YOR033C                                          | EXO1          | YCR077C                 | PAT1          |
| YPL057C                                          | SUR1          | YPL195W                 | APL5          |
| YBR173C                                          | UMP1          | YGL025C                 | PGD1          |
| YNL288W                                          | CAF40         | YLR360W                 | VPS38         |
| YDR484W                                          | VPS52         | YBL103C                 | RTG3          |
| YBR217W                                          | ATG12         | YDL083C                 | RPS16B        |
| YGL087C                                          | MMS2          | YJL124C                 | LSM1          |
| YLL007C                                          | YLL007C       | YJL154C                 | VPS35         |
| YLR109W                                          | AHP1          | YER042W                 | MXR1          |
| YJL183W                                          | MNN11         | YJL190C                 | RPS22A        |
| YLR095C                                          | IOC2          | YML115C                 | VAN1          |
| YCL067C                                          | HMLALPHA2     | YPL240C                 | HSP82         |
| YLR090W                                          | XDJ1          | YBL103C                 | RTG3          |
| YML103C                                          | NUP188        | YKL048C                 | ELM1          |
| YMR106C                                          | YKU80         | YML028W                 | TSA1          |
| YFR031C-A                                        | RPL2A         | YPR046W                 | MCM16         |
| YDR469W                                          | SDC1          | YDR155C                 | CPR1          |
| YPR046W                                          | MCM16         | YDR155C                 | CPR1          |
| YFR010W                                          | UBP6          | YML028W                 | TSA1          |
| YCR034W                                          | FEN1          | YGL250W                 | RMR1          |
| YDR477W                                          | SNF1          | YPL256C                 | CLN2          |
| YOR127W                                          | RGA1          | YDL006W                 | PTC1          |
| YJL029C                                          | VPS53         | YGL095C                 | VPS45         |
| YHL031C                                          | GOS1          | YNL041C                 | COG6          |
| YHR013C                                          | ARD1          | YDR183W                 | PLP1          |
| YER116C                                          | SLX8          | YLR410W                 | VIP1          |

| Predictions at threshold level 0.75 continued... |               |                         |               |
|--------------------------------------------------|---------------|-------------------------|---------------|
| Gene1 of predicted pair                          |               | Gene2 of predicted pair |               |
| Systematic Name                                  | Standard Name | Systematic Name         | Standard Name |
| YNL307C                                          | MCK1          | YML071C                 | COG8          |
| YPL240C                                          | HSP82         | YER100W                 | UBC6          |
| YDR225W                                          | HTA1          | YNR072W                 | HXT17         |
| YNL206C                                          | RTT106        | YEL056W                 | HAT2          |
| YPL161C                                          | BEM4          | YDL192W                 | ARF1          |
| YBR260C                                          | RGD1          | YJL095W                 | BCK1          |
| YHR052W                                          | CIC1          | YLR150W                 | STM1          |
| YPL042C                                          | SSN3          | YJL127C                 | SPT10         |
| YKL110C                                          | KTI12         | YBL071W-A               | KTI11         |
| YHR160C                                          | PEX18         | YLR191W                 | PEX13         |
| YIL159W                                          | BNR1          | YDR137W                 | RGP1          |
| YPL129W                                          | TAF14         | YNL031C                 | HHT2          |
| YPL050C                                          | MNN9          | YOR035C                 | SHE4          |
| YHL031C                                          | GOS1          | YJL004C                 | SYS1          |
| YDR004W                                          | RAD57         | YMR231W                 | PEP5          |
| YDR318W                                          | MCM21         | YGL003C                 | CDH1          |
| YIL036W                                          | CST6          | YNL307C                 | MCK1          |
| YEL053C                                          | MAK10         | YEL056W                 | HAT2          |
| YBL008W                                          | HIR1          | YMR167W                 | MLH1          |
| YGR249W                                          | MGA1          | YMR214W                 | SCJ1          |
| YPR072W                                          | NOT5          | YDR071C                 | PAA1          |
| YNL307C                                          | MCK1          | YML028W                 | TSA1          |
| YDR245W                                          | MNN10         | YDR456W                 | NHX1          |
| YHR039C-A                                        | VMA10         | YOR038C                 | HIR2          |
| YBR200W                                          | BEM1          | YBL103C                 | RTG3          |
| YLR292C                                          | SEC72         | YMR055C                 | BUB2          |
| YDR293C                                          | SSD1          | YOR127W                 | RGA1          |
| YLR192C                                          | HCR1          | YLR370C                 | ARC18         |
| YNL307C                                          | MCK1          | YOL111C                 | MDY2          |

| Predictions at threshold level 0.75 continued... |               |                         |               |
|--------------------------------------------------|---------------|-------------------------|---------------|
| Gene1 of predicted pair                          |               | Gene2 of predicted pair |               |
| Systematic Name                                  | Standard Name | Systematic Name         | Standard Name |
| YGL178W                                          | MPT5          | YCR009C                 | RVS161        |
| YLR093C                                          | NYV1          | YML071C                 | COG8          |
| YPL253C                                          | VIK1          | YGR270W                 | YTA7          |
| YPR120C                                          | CLB5          | YKL161C                 | YKL161C       |
| YOR132W                                          | VPS17         | YPL037C                 | EGD1          |
| YOL044W                                          | PEX15         | YAL055W                 | PEX22         |
| YPL057C                                          | SUR1          | YLR315W                 | NKP2          |
| YPR029C                                          | APL4          | YJR125C                 | ENT3          |
| YGL212W                                          | VAM7          | YCL037C                 | SRO9          |
| YNL291C                                          | MID1          | YPR120C                 | CLB5          |
| YDR225W                                          | HTA1          | YLR381W                 | CTF3          |
| YFR031C-A                                        | RPL2A         | YGL223C                 | COG1          |
| YMR080C                                          | NAM7          | YNL218W                 | MGS1          |
| YDR309C                                          | GIC2          | YOR327C                 | SNC2          |
| YJR135C                                          | MCM22         | YJR032W                 | CPR7          |
| YJL183W                                          | MNN11         | YLR233C                 | EST1          |
| YCR077C                                          | PAT1          | YLR350W                 | ORM2          |
| YMR224C                                          | MRE11         | YBR228W                 | SLX1          |
| YER116C                                          | SLX8          | YHR013C                 | ARD1          |
| YLR337C                                          | VRP1          | YPL050C                 | MNN9          |
| YDL184C                                          | RPL41A        | YBR200W                 | BEM1          |
| YNR072W                                          | HXT17         | YOR043W                 | WHI2          |
| YBL071W-A                                        | KTI11         | YIL103W                 | DPH1          |
| YOL111C                                          | MDY2          | YKR035W-A               | DID2          |
| YOR043W                                          | WHI2          | YDR469W                 | SDC1          |
| YJL127C                                          | SPT10         | YJL124C                 | LSM1          |
| YAL024C                                          | LTE1          | YDR335W                 | MSN5          |
| YPL018W                                          | CTF19         | YKL114C                 | APN1          |
| YLR119W                                          | SRN2          | YPR046W                 | MCM16         |

| Predictions at threshold level 0.75 continued... |               |                         |               |
|--------------------------------------------------|---------------|-------------------------|---------------|
| Gene1 of predicted pair                          |               | Gene2 of predicted pair |               |
| Systematic Name                                  | Standard Name | Systematic Name         | Standard Name |
| YDR080W                                          | VPS41         | YHR060W                 | VMA22         |
| YBR107C                                          | IML3          | YDR254W                 | CHL4          |
| YIL156W                                          | UBP7          | YNL199C                 | GCR2          |
| YJR060W                                          | CBF1          | YHR012W                 | VPS29         |
| YDL083C                                          | RPS16B        | YHR081W                 | LRP1          |
| YHR156C                                          | LIN1          | YLR398C                 | SKI2          |
| YBR042C                                          | CST26         | YGL215W                 | CLG1          |
| YLR254C                                          | NDL1          | YAR014C                 | BUD14         |
| YER114C                                          | BOI2          | YBR200W                 | BEM1          |
| YJL172W                                          | CPS1          | YNL041C                 | COG6          |
| YOR043W                                          | WHI2          | YHR158C                 | KEL1          |
| YJL176C                                          | SWI3          | YGR275W                 | RTT102        |
| YBR194W                                          | SOY1          | YPL018W                 | CTF19         |
| YDR443C                                          | SSN2          | YPL042C                 | SSN3          |
| YOR043W                                          | WHI2          | YBR280C                 | SAF1          |
| YCR066W                                          | RAD18         | YHR012W                 | VPS29         |
| YLR079W                                          | SIC1          | YPR046W                 | MCM16         |
| YKL025C                                          | PAN3          | YBL021C                 | HAP3          |
| YNL054W                                          | VAC7          | YGR188C                 | BUB1          |
| YDR295C                                          | HDA2          | YDR318W                 | MCM21         |
| YPL024W                                          | RMI1          | YMR055C                 | BUB2          |
| YOR290C                                          | SNF2          | YML001W                 | YPT7          |
| YLR095C                                          | IOC2          | YPL037C                 | EGD1          |
| YLL007C                                          | YLL007C       | YOL067C                 | RTG1          |
| YKR099W                                          | BAS1          | YLR370C                 | ARC18         |
| YBR127C                                          | VMA2          | YKL041W                 | VPS24         |
| YIL053W                                          | RHR2          | YML071C                 | COG8          |
| YDR379W                                          | RGA2          | YHR111W                 | UBA4          |
| YFR036W                                          | CDC26         | YGL003C                 | CDH1          |



| Predictions at threshold level 0.75 continued... |               |                         |               |
|--------------------------------------------------|---------------|-------------------------|---------------|
| Gene1 of predicted pair                          |               | Gene2 of predicted pair |               |
| Systematic Name                                  | Standard Name | Systematic Name         | Standard Name |
| YCR086W                                          | CSM1          | YEL056W                 | HAT2          |
| YER144C                                          | UBP5          | YOR035C                 | SHE4          |
| YBR111W-A                                        | SUS1          | YNL030W                 | HHF2          |
| YMR224C                                          | MRE11         | YMR199W                 | CLN1          |
| YGL033W                                          | HOP2          | YMR153W                 | NUP53         |
| YNL069C                                          | RPL16B        | YKR030W                 | GMH1          |
| YLR094C                                          | GIS3          | YDR358W                 | GGA1          |
| YDR245W                                          | MNN10         | YGL200C                 | EMP24         |
| YKL025C                                          | PAN3          | YPL161C                 | BEM4          |
| YKL139W                                          | CTK1          | YKR099W                 | BAS1          |
| YFR010W                                          | UBP6          | YDR261C                 | EXG2          |
| YPL057C                                          | SUR1          | YHR077C                 | NMD2          |
| YMR080C                                          | NAM7          | YBR228W                 | SLX1          |
| YJL154C                                          | VPS35         | YEL043W                 | YEL043W       |
| YFR010W                                          | UBP6          | YGL163C                 | RAD54         |
| YDR108W                                          | GSG1          | YBR131W                 | CCZ1          |
| YPR046W                                          | MCM16         | YMR214W                 | SCJ1          |
| YFR010W                                          | UBP6          | YBR020W                 | GAL1          |
| YPL112C                                          | PEX25         | YAL055W                 | PEX22         |
| YOR014W                                          | RTS1          | YLR182W                 | SWI6          |
| YKL139W                                          | CTK1          | YBR107C                 | IML3          |
| YOR023C                                          | AHC1          | YJR032W                 | CPR7          |
| YGL133W                                          | ITC1          | YKL048C                 | ELM1          |
| YGL174W                                          | BUD13         | YGR270W                 | YTA7          |
| YNL289W                                          | PCL1          | YHR115C                 | DMA1          |
| YHL027W                                          | RIM101        | YPR173C                 | VPS4          |
| YPL137C                                          | GIP3          | YBR019C                 | GAL10         |
| YPL129W                                          | TAF14         | YOR156C                 | NFI1          |
| YPL024W                                          | RMI1          | YER044C                 | ERG28         |

| Predictions at threshold level 0.75 continued... |               |                         |               |
|--------------------------------------------------|---------------|-------------------------|---------------|
| Gene1 of predicted pair                          |               | Gene2 of predicted pair |               |
| Systematic Name                                  | Standard Name | Systematic Name         | Standard Name |
| YLR234W                                          | TOP3          | YBR114W                 | RAD16         |
| YNL325C                                          | FIG4          | YNL238W                 | KEX2          |
| YER144C                                          | UBP5          | YOL081W                 | IRA2          |
| YGL033W                                          | HOP2          | YJR084W                 | CSN12         |
| YLR288C                                          | MEC3          | YER161C                 | SPT2          |
| YJL060W                                          | BNA3          | YJR060W                 | CBF1          |
| YGL147C                                          | RPL9A         | YLR320W                 | MMS22         |
| YDR378C                                          | LSM6          | YKL110C                 | KTI12         |
| YGR108W                                          | CLB1          | YHL002W                 | HSE1          |
| YDR318W                                          | MCM21         | YNL107W                 | YAF9          |
| YBR107C                                          | IML3          | YHL002W                 | HSE1          |
| YDR264C                                          | AKR1          | YJR086W                 | STE18         |
| YCL067C                                          | HMLALPHA2     | YDL005C                 | MED2          |
| YNL215W                                          | IES2          | YAL002W                 | VPS8          |
| YGR104C                                          | SRB5          | YDR477W                 | SNF1          |
| YDL020C                                          | RPN4          | YGR081C                 | SLX9          |
| YJL053W                                          | PEP8          | YAR014C                 | BUD14         |
| YEL053C                                          | MAK10         | YLR180W                 | SAM1          |
| YBR194W                                          | SOY1          | YMR038C                 | CCS1          |
| YNL031C                                          | HHT2          | YOR064C                 | YNG1          |
| YGL095C                                          | VPS45         | YOR036W                 | PEP12         |
| YPL240C                                          | HSP82         | YJL184W                 | GON7          |
| YDR254W                                          | CHL4          | YLR233C                 | EST1          |
| YDR108W                                          | GSG1          | YDR153C                 | ENT5          |
| YMR055C                                          | BUB2          | YDR200C                 | VPS64         |
| YOR112W                                          | CEX1          | YPL234C                 | TFP3          |
| YOR043W                                          | WHI2          | YNL076W                 | MKS1          |
| YDL020C                                          | RPN4          | YNL307C                 | MCK1          |
| YOR043W                                          | WHI2          | YBR019C                 | GAL10         |

| Predictions at threshold level 0.75 continued... |               |                         |               |
|--------------------------------------------------|---------------|-------------------------|---------------|
| Gene1 of predicted pair                          |               | Gene2 of predicted pair |               |
| Systematic Name                                  | Standard Name | Systematic Name         | Standard Name |
| YGR019W                                          | UGA1          | YDR293C                 | SSD1          |
| YDL116W                                          | NUP84         | YGL163C                 | RAD54         |
| YHL027W                                          | RIM101        | YJL095W                 | BCK1          |
| YMR284W                                          | YKU70         | YOR080W                 | DIA2          |
| YML097C                                          | VPS9          | YMR089C                 | YTA12         |
| YPL057C                                          | SUR1          | YGL003C                 | CDH1          |
| YDR213W                                          | UPC2          | YMR070W                 | MOT3          |
| YDR358W                                          | GGA1          | YOL081W                 | IRA2          |
| YML117W                                          | NAB6          | YBR082C                 | UBC4          |
| YJL136C                                          | RPS21B        | YKR048C                 | NAP1          |
| YDR484W                                          | VPS52         | YML001W                 | YPT7          |
| YMR224C                                          | MRE11         | YDR260C                 | SWM1          |
| YNL041C                                          | COG6          | YLR398C                 | SKI2          |
| YDL042C                                          | SIR2          | YLR399C                 | BDF1          |
| YGR270W                                          | YTA7          | YLR350W                 | ORM2          |
| YDR080W                                          | VPS41         | YCR066W                 | RAD18         |
| YGR054W                                          | YGR054W       | YGL253W                 | HXK2          |
| YGL025C                                          | PGD1          | YBR171W                 | SEC66         |
| YKL129C                                          | MYO3          | YOR035C                 | SHE4          |
| YMR026C                                          | PEX12         | YBR280C                 | SAF1          |
| YDL116W                                          | NUP84         | YHR111W                 | UBA4          |
| YPR017C                                          | DSS4          | YCL001W                 | RER1          |
| YPR036W                                          | VMA13         | YOL121C                 | RPS19A        |
| YBR173C                                          | UMP1          | YDL223C                 | HBT1          |
| YBL102W                                          | SFT2          | YLR360W                 | VPS38         |
| YLR386W                                          | VAC14         | YFR036W                 | CDC26         |
| YHR156C                                          | LIN1          | YMR214W                 | SCJ1          |
| YDR080W                                          | VPS41         | YPR032W                 | SRO7          |
| YOR038C                                          | HIR2          | YER139C                 | YER139C       |

| Predictions at threshold level 0.75 continued... |               |                         |               |
|--------------------------------------------------|---------------|-------------------------|---------------|
| Gene1 of predicted pair                          |               | Gene2 of predicted pair |               |
| Systematic Name                                  | Standard Name | Systematic Name         | Standard Name |
| YLR192C                                          | HCR1          | YBR082C                 | UBC4          |
| YOR290C                                          | SNF2          | YKR035W-A               | DID2          |
| YNL243W                                          | SLA2          | YDL006W                 | PTC1          |
| YHL031C                                          | GOS1          | YEL036C                 | ANP1          |
| YEL065W                                          | SIT1          | YJR084W                 | CSN12         |
| YLR192C                                          | HCR1          | YBR280C                 | SAF1          |
| YNL307C                                          | MCK1          | YLR032W                 | RAD5          |
| YHR134W                                          | WSS1          | YHR167W                 | THP2          |
| YDR329C                                          | PEX3          | YDL065C                 | PEX19         |
| YER161C                                          | SPT2          | YHR039C-A               | VMA10         |
| YLR315W                                          | NKP2          | YNL107W                 | YAF9          |
| YNR072W                                          | HXT17         | YJL183W                 | MNN11         |
| YLR309C                                          | IMH1          | YNR032W                 | PPG1          |
| YJR056C                                          | YJR056C       | YOR043W                 | WHI2          |
| YLR095C                                          | IOC2          | YER144C                 | UBP5          |
| YLR337C                                          | VRP1          | YLR292C                 | SEC72         |
| YOR337W                                          | TEA1          | YPR030W                 | CSR2          |
| YGL124C                                          | MON1          | YER122C                 | GLO3          |
| YML038C                                          | YMD8          | YHR012W                 | VPS29         |
| YLR353W                                          | BUD8          | YOR301W                 | RAX1          |
| YLR119W                                          | SRN2          | YGL078C                 | DBP3          |
| YNL087W                                          | TCB2          | YOR327C                 | SNC2          |
| YDR363W-A                                        | SEM1          | YHR167W                 | THP2          |
| YNL079C                                          | TPM1          | YPR119W                 | CLB2          |
| YIL053W                                          | RHR2          | YBR173C                 | UMP1          |
| YJL176C                                          | SWI3          | YBR082C                 | UBC4          |
| YFR036W                                          | CDC26         | YNL076W                 | MKS1          |
| YNL215W                                          | IES2          | YDR335W                 | MSN5          |
| YMR224C                                          | MRE11         | YOR213C                 | SAS5          |

| Predictions at threshold level 0.75 continued... |               |                         |               |
|--------------------------------------------------|---------------|-------------------------|---------------|
| Gene1 of predicted pair                          |               | Gene2 of predicted pair |               |
| Systematic Name                                  | Standard Name | Systematic Name         | Standard Name |
| YHR073W                                          | OSH3          | YPL178W                 | CBC2          |
| YLR320W                                          | MMS22         | YDR261C                 | EXG2          |
| YDR108W                                          | GSG1          | YKL119C                 | VPH2          |
| YER116C                                          | SLX8          | YDR318W                 | MCM21         |
| YMR152W                                          | YIM1          | YNL076W                 | MKS1          |
| YML038C                                          | YMD8          | YJR033C                 | RAV1          |
| YDR378C                                          | LSM6          | YKR026C                 | GCN3          |
| YJL124C                                          | LSM1          | YBR215W                 | HPC2          |
| YHL020C                                          | OPI1          | YFL031W                 | HAC1          |
| YNL218W                                          | MGS1          | YOR076C                 | SKI7          |
| YER096W                                          | SHC1          | YLR425W                 | TUS1          |
| YKL160W                                          | ELF1          | YLR306W                 | UBC12         |
| YMR038C                                          | CCS1          | YGL031C                 | RPL24A        |
| YJL176C                                          | SWI3          | YGR072W                 | UPF3          |
| YKL025C                                          | PAN3          | YJR032W                 | CPR7          |
| YGL147C                                          | RPL9A         | YLR370C                 | ARC18         |
| YGR108W                                          | CLB1          | YLR429W                 | CRN1          |
| YIL053W                                          | RHR2          | YEL060C                 | PRB1          |
| YBR215W                                          | HPC2          | YPR119W                 | CLB2          |
| YDR443C                                          | SSN2          | YOR066W                 | MSA1          |
| YDL077C                                          | VAM6          | YLR309C                 | IMH1          |
| YPL158C                                          | YPL158C       | YJL095W                 | BCK1          |
| YGL087C                                          | MMS2          | YLR032W                 | RAD5          |
| YBL051C                                          | PIN4          | YGR270W                 | YTA7          |
| YDR071C                                          | PAA1          | YNL107W                 | YAF9          |
| YPR084W                                          | YPR084W       | YCR077C                 | PAT1          |
| YEL053C                                          | MAK10         | YEL043W                 | YEL043W       |
| YDR080W                                          | VPS41         | YKR001C                 | VPS1          |
| YBR200W                                          | BEM1          | YPL057C                 | SUR1          |

| Predictions at threshold level 0.75 continued... |               |                         |               |
|--------------------------------------------------|---------------|-------------------------|---------------|
| Gene1 of predicted pair                          |               | Gene2 of predicted pair |               |
| Systematic Name                                  | Standard Name | Systematic Name         | Standard Name |
| YDR443C                                          | SSN2          | YOL051W                 | GAL11         |
| YML095C                                          | RAD10         | YJL190C                 | RPS22A        |
| YGL060W                                          | YBP2          | YLR381W                 | CTF3          |
| YLR150W                                          | STM1          | YHR200W                 | RPN10         |
| YOR109W                                          | INP53         | YPR032W                 | SRO7          |
| YJR059W                                          | PTK2          | YMR199W                 | CLN1          |
| YDL101C                                          | DUN1          | YCR086W                 | CSM1          |
| YDR245W                                          | MNN10         | YOR275C                 | RIM20         |
| YLR094C                                          | GIS3          | YJR032W                 | CPR7          |
| YPL195W                                          | APL5          | YPL120W                 | VPS30         |
| YMR095C                                          | SNO1          | YHR060W                 | VMA22         |
| YMR109W                                          | MYO5          | YHL027W                 | RIM101        |
| YOL126C                                          | MDH2          | YML057W                 | CMP2          |
| YNR052C                                          | POP2          | YDR378C                 | LSM6          |
| YKL048C                                          | ELM1          | YDR144C                 | MKC7          |
| YLR094C                                          | GIS3          | YOR066W                 | MSA1          |
| YNL051W                                          | COG5          | YAL002W                 | VPS8          |
| YMR055C                                          | BUB2          | YKL101W                 | HSL1          |
| YIL050W                                          | PCL7          | YPL219W                 | PCL8          |
| YLR381W                                          | CTF3          | YKR061W                 | KTR2          |
| YPL024W                                          | RMI1          | YBR194W                 | SOY1          |
| YBR260C                                          | RGD1          | YOR035C                 | SHE4          |
| YNL031C                                          | HHT2          | YEL056W                 | HAT2          |
| YKL048C                                          | ELM1          | YLR410W                 | VIP1          |
| YFL023W                                          | BUD27         | YER044C                 | ERG28         |
| YPL022W                                          | RAD1          | YER116C                 | SLX8          |
| YMR224C                                          | MRE11         | YDL192W                 | ARF1          |
| YKL139W                                          | CTK1          | YNL116W                 | DMA2          |
| YBR111W-A                                        | SUS1          | YOL148C                 | SPT20         |

| Predictions at threshold level 0.75 continued... |               |                         |               |
|--------------------------------------------------|---------------|-------------------------|---------------|
| Gene1 of predicted pair                          |               | Gene2 of predicted pair |               |
| Systematic Name                                  | Standard Name | Systematic Name         | Standard Name |
| YGL066W                                          | SGF73         | YPL161C                 | BEM4          |
| YBR107C                                          | IML3          | YJL190C                 | RPS22A        |
| YGR104C                                          | SRB5          | YKL139W                 | CTK1          |
| YNL325C                                          | FIG4          | YDR484W                 | VPS52         |
| YJR032W                                          | CPR7          | YDR183W                 | PLP1          |
| YNL215W                                          | IES2          | YBR215W                 | HPC2          |
| YOR145C                                          | PNO1          | YKL143W                 | LTV1          |
| YJL176C                                          | SWI3          | YBR010W                 | HHT1          |
| YDL116W                                          | NUP84         | YOR358W                 | HAP5          |
| YMR224C                                          | MRE11         | YFR036W                 | CDC26         |
| YPR131C                                          | NAT3          | YDR207C                 | UME6          |
| YBR200W                                          | BEM1          | YER162C                 | RAD4          |
| YML103C                                          | NUP188        | YBR017C                 | KAP104        |
| YKR069W                                          | MET1          | YKL129C                 | MYO3          |
| YNL291C                                          | MID1          | YPR051W                 | MAK3          |
| YOR253W                                          | NAT5          | YHR013C                 | ARD1          |
| YBR057C                                          | MUM2          | YGL212W                 | VAM7          |
| YGL066W                                          | SGF73         | YGR252W                 | GCN5          |
| YBR041W                                          | FAT1          | YBL101C                 | ECM21         |
| YDR146C                                          | SWI5          | YFR034C                 | PHO4          |
| YDR108W                                          | GSG1          | YAL002W                 | VPS8          |
| YLR095C                                          | IOC2          | YGL115W                 | SNF4          |
| YDL116W                                          | NUP84         | YNL307C                 | MCK1          |
| YEL053C                                          | MAK10         | YDL006W                 | PTC1          |
| YEL050C                                          | RML2          | YDR378C                 | LSM6          |
| YIL076W                                          | SEC28         | YDR080W                 | VPS41         |
| YHR156C                                          | LIN1          | YOL081W                 | IRA2          |
| YDR156W                                          | RPA14         | YKL048C                 | ELM1          |
| YDR137W                                          | RGP1          | YPL234C                 | TFP3          |

| Predictions at threshold level 0.75 continued... |               |                         |               |
|--------------------------------------------------|---------------|-------------------------|---------------|
| Gene1 of predicted pair                          |               | Gene2 of predicted pair |               |
| Systematic Name                                  | Standard Name | Systematic Name         | Standard Name |
| YNL307C                                          | MCK1          | YOR312C                 | RPL20B        |
| YDL122W                                          | UBP1          | YJR099W                 | YUH1          |
| YBL008W                                          | HIR1          | YGR108W                 | CLB1          |
| YDR456W                                          | NHX1          | YLR425W                 | TUS1          |
| YGL147C                                          | RPL9A         | YMR230W                 | RPS10B        |
| YMR116C                                          | ASC1          | YBL047C                 | EDE1          |
| YLR083C                                          | EMP70         | YLR309C                 | IMH1          |
| YDR320C                                          | SWA2          | YKR001C                 | VPS1          |
| YNL288W                                          | CAF40         | YDR310C                 | SUM1          |
| YKL032C                                          | IXR1          | YCR077C                 | PAT1          |
| YGL161C                                          | YIP5          | YML097C                 | VPS9          |
| YOR141C                                          | ARP8          | YLR182W                 | SWI6          |
| YPL256C                                          | CLN2          | YJR090C                 | GRR1          |
| YML095C                                          | RAD10         | YKR048C                 | NAP1          |
| YNL243W                                          | SLA2          | YBL061C                 | SKT5          |
| YKR035W-A                                        | DID2          | YJR084W                 | CSN12         |
| YER179W                                          | DMC1          | YNL230C                 | ELA1          |
| YDR293C                                          | SSD1          | YPL037C                 | EGD1          |
| YML115C                                          | VAN1          | YGL200C                 | EMP24         |
| YLR288C                                          | MEC3          | YDR289C                 | RTT103        |
| YHR052W                                          | CIC1          | YGL246C                 | RAI1          |
| YBL051C                                          | PIN4          | YMR055C                 | BUB2          |
| YDR309C                                          | GIC2          | YOL112W                 | MSB4          |
| YDR484W                                          | VPS52         | YHR060W                 | VMA22         |
| YIL159W                                          | BNR1          | YDL184C                 | RPL41A        |
| YCR065W                                          | HCM1          | YPR119W                 | CLB2          |
| YMR224C                                          | MRE11         | YNL248C                 | RPA49         |
| YGR252W                                          | GCN5          | YHR108W                 | GGA2          |
| YDR137W                                          | RGP1          | YPL037C                 | EGD1          |



| Predictions at threshold level 0.75 continued... |               |                         |               |
|--------------------------------------------------|---------------|-------------------------|---------------|
| Gene1 of predicted pair                          |               | Gene2 of predicted pair |               |
| Systematic Name                                  | Standard Name | Systematic Name         | Standard Name |
| YOR127W                                          | RGA1          | YNL206C                 | RTT106        |
| YBL058W                                          | SHP1          | YBR280C                 | SAF1          |
| YLR192C                                          | HCR1          | YJL183W                 | MNN11         |
| YIL034C                                          | CAP2          | YBR108W                 | YBR108W       |
| YDR117C                                          | TMA64         | YHR203C                 | RPS4B         |
| YOR083W                                          | WHI5          | YMR055C                 | BUB2          |
| YJL053W                                          | PEP8          | YDL161W                 | ENT1          |
| YER162C                                          | RAD4          | YJL095W                 | BCK1          |
| YJR060W                                          | CBF1          | YMR054W                 | STV1          |
| YLR135W                                          | SLX4          | YML028W                 | TSA1          |
| YLR315W                                          | NKP2          | YER139C                 | YER139C       |
| YNL047C                                          | SLM2          | YNL229C                 | URE2          |
| YHR060W                                          | VMA22         | YHR012W                 | VPS29         |
| YML016C                                          | PPZ1          | YJR060W                 | CBF1          |
| YKL139W                                          | CTK1          | YMR214W                 | SCJ1          |
| YLR090W                                          | XDJ1          | YLR398C                 | SKI2          |
| YDR443C                                          | SSN2          | YPL024W                 | RMI1          |
| YJR056C                                          | YJR056C       | YPR046W                 | MCM16         |
| YDR004W                                          | RAD57         | YMR055C                 | BUB2          |
| YPL140C                                          | MKK2          | YJL095W                 | BCK1          |
| YHR108W                                          | GGA2          | YHR158C                 | KEL1          |
| YLR119W                                          | SRN2          | YKL116C                 | PRR1          |
| YNL206C                                          | RTT106        | YGR252W                 | GCN5          |
| YDR443C                                          | SSN2          | YNL307C                 | MCK1          |
| YPR036W                                          | VMA13         | YDR261C                 | EXG2          |
| YLR148W                                          | PEP3          | YAL002W                 | VPS8          |
| YJL053W                                          | PEP8          | YNR032W                 | PPG1          |
| YDR484W                                          | VPS52         | YOR327C                 | SNC2          |
| YPL248C                                          | GAL4          | YKL109W                 | HAP4          |

| Predictions at threshold level 0.75 continued... |               |                         |               |
|--------------------------------------------------|---------------|-------------------------|---------------|
| Gene1 of predicted pair                          |               | Gene2 of predicted pair |               |
| Systematic Name                                  | Standard Name | Systematic Name         | Standard Name |
| YDR071C                                          | PAA1          | YGR135W                 | PRE9          |
| YMR127C                                          | SAS2          | YGR188C                 | BUB1          |
| YIL053W                                          | RHR2          | YNL087W                 | TCB2          |
| YDR309C                                          | GIC2          | YBL085W                 | BOI1          |
| YDR176W                                          | NGG1          | YNL236W                 | SIN4          |
| YNL215W                                          | IES2          | YNL199C                 | GCR2          |
| YPL253C                                          | VIK1          | YBR107C                 | IML3          |
| YFR010W                                          | UBP6          | YGL141W                 | HUL5          |
| YFR010W                                          | UBP6          | YNL032W                 | SIW14         |
| YBR108W                                          | YBR108W       | YKR035W-A               | DID2          |
| YGL163C                                          | RAD54         | YJR035W                 | RAD26         |
| YOR141C                                          | ARP8          | YNL107W                 | YAF9          |
| YNL032W                                          | SIW14         | YKL126W                 | YPK1          |
| YGR105W                                          | VMA21         | YJR032W                 | CPR7          |
| YHR134W                                          | WSS1          | YJR135C                 | MCM22         |
| YDR477W                                          | SNF1          | YBR010W                 | HHT1          |
| YKR020W                                          | VPS51         | YCR077C                 | PAT1          |
| YMR127C                                          | SAS2          | YPR051W                 | MAK3          |
| YCL001W                                          | RER1          | YDL077C                 | VAM6          |
| YNL032W                                          | SIW14         | YMR152W                 | YIM1          |
| YDR293C                                          | SSD1          | YPL018W                 | CTF19         |
| YGL054C                                          | ERV14         | YNL107W                 | YAF9          |
| YDR392W                                          | SPT3          | YGL178W                 | MPT5          |
| YKR072C                                          | SIS2          | YEL056W                 | HAT2          |
| YOR127W                                          | RGA1          | YGL054C                 | ERV14         |
| YOR083W                                          | WHI5          | YDR171W                 | HSP42         |
| YMR095C                                          | SNO1          | YGL212W                 | VAM7          |
| YNL206C                                          | RTT106        | YKL074C                 | MUD2          |
| YDR137W                                          | RGP1          | YDR440W                 | DOT1          |

| Predictions at threshold level 0.75 continued... |               |                         |               |
|--------------------------------------------------|---------------|-------------------------|---------------|
| Gene1 of predicted pair                          |               | Gene2 of predicted pair |               |
| Systematic Name                                  | Standard Name | Systematic Name         | Standard Name |
| YDR379W                                          | RGA2          | YKR048C                 | NAP1          |
| YGL124C                                          | MON1          | YMR311C                 | GLC8          |
| YBR217W                                          | ATG12         | YLL042C                 | ATG10         |
| YGR252W                                          | GCN5          | YKL160W                 | ELF1          |
| YOR197W                                          | MCA1          | YNL094W                 | APP1          |
| YDR293C                                          | SSD1          | YJL183W                 | MNN11         |
| YDR202C                                          | RAV2          | YPL105C                 | YPL105C       |
| YOR069W                                          | VPS5          | YNL127W                 | FAR11         |
| YHR060W                                          | VMA22         | YEL051W                 | VMA8          |
| YPL037C                                          | EGD1          | YEL043W                 | YEL043W       |
| YNL307C                                          | MCK1          | YNL082W                 | PMS1          |
| YDR335W                                          | MSN5          | YDR183W                 | PLP1          |
| YMR224C                                          | MRE11         | YGL115W                 | SNF4          |
| YDR320C                                          | SWA2          | YGL223C                 | COG1          |
| YGL033W                                          | HOP2          | YLR371W                 | ROM2          |
| YDL116W                                          | NUP84         | YNL199C                 | GCR2          |
| YGL175C                                          | SAE2          | YGL163C                 | RAD54         |
| YIL159W                                          | BNR1          | YGL003C                 | CDH1          |
| YHR111W                                          | UBA4          | YDR310C                 | SUM1          |
| YDR383C                                          | NKP1          | YDR183W                 | PLP1          |
| YMR142C                                          | RPL13B        | YBR200W                 | BEM1          |
| YGL200C                                          | EMP24         | YBL047C                 | EDE1          |
| YDR477W                                          | SNF1          | YGL212W                 | VAM7          |
| YGR204W                                          | ADE3          | YEL046C                 | GLY1          |
| YKL161C                                          | YKL161C       | YHR158C                 | KEL1          |
| YBR020W                                          | GAL1          | YNL004W                 | HRB1          |
| YNL116W                                          | DMA2          | YOL081W                 | IRA2          |
| YGL060W                                          | YBP2          | YOR080W                 | DIA2          |
| YMR224C                                          | MRE11         | YGL033W                 | HOP2          |

| Predictions at threshold level 0.75 continued... |               |                         |               |
|--------------------------------------------------|---------------|-------------------------|---------------|
| Gene1 of predicted pair                          |               | Gene2 of predicted pair |               |
| Systematic Name                                  | Standard Name | Systematic Name         | Standard Name |
| YFL033C                                          | RIM15         | YOL018C                 | TLG2          |
| YKL116C                                          | PRR1          | YER122C                 | GLO3          |
| YJL154C                                          | VPS35         | YBL102W                 | SFT2          |
| YGR019W                                          | UGA1          | YEL053C                 | MAK10         |
| YHR060W                                          | VMA22         | YNL127W                 | FAR11         |
| YDR144C                                          | MKC7          | YNL107W                 | YAF9          |
| YGL147C                                          | RPL9A         | YDL192W                 | ARF1          |
| YML103C                                          | NUP188        | YKR095W                 | MLP1          |
| YDR363W-A                                        | SEM1          | YGL115W                 | SNF4          |
| YJL095W                                          | BCK1          | YCR053W                 | THR4          |
| YKL126W                                          | YPK1          | YJR032W                 | CPR7          |
| YOR140W                                          | SFL1          | YLR425W                 | TUS1          |
| YOR109W                                          | INP53         | YPL161C                 | BEM4          |
| YBL103C                                          | RTG3          | YPL161C                 | BEM4          |
| YGL153W                                          | PEX14         | YJL006C                 | CTK2          |
| YJR032W                                          | CPR7          | YBR036C                 | CSG2          |
| YBR108W                                          | YBR108W       | YJR056C                 | YJR056C       |
| YDR477W                                          | SNF1          | YFL023W                 | BUD27         |
| YHR167W                                          | THP2          | YHR077C                 | NMD2          |
| YBL008W                                          | HIR1          | YOL091W                 | SPO21         |
| YAL024C                                          | LTE1          | YHR158C                 | KEL1          |
| YPL096C-A                                        | ERI1          | YDL223C                 | HBT1          |
| YLR216C                                          | CPR6          | YNL307C                 | MCK1          |
| YEL043W                                          | YEL043W       | YPL120W                 | VPS30         |
| YCR084C                                          | TUP1          | YNL236W                 | SIN4          |
| YBR173C                                          | UMP1          | YKL048C                 | ELM1          |
| YDR443C                                          | SSN2          | YML001W                 | YPT7          |
| YDR383C                                          | NKP1          | YNL116W                 | DMA2          |
| YLR362W                                          | STE11         | YDR309C                 | GIC2          |

| Predictions at threshold level 0.75 continued... |               |                         |               |
|--------------------------------------------------|---------------|-------------------------|---------------|
| Gene1 of predicted pair                          |               | Gene2 of predicted pair |               |
| Systematic Name                                  | Standard Name | Systematic Name         | Standard Name |
| YAL024C                                          | LTE1          | YGL163C                 | RAD54         |
| YHR079C                                          | IRE1          | YOR023C                 | AHC1          |
| YGL223C                                          | COG1          | YHR060W                 | VMA22         |
| YOR337W                                          | TEA1          | YBR200W                 | BEM1          |
| YMR095C                                          | SNO1          | YDR477W                 | SNF1          |
| YPL057C                                          | SUR1          | YKR035W-A               | DID2          |
| YER116C                                          | SLX8          | YKL101W                 | HSL1          |
| YDL002C                                          | NHP10         | YAL002W                 | VPS8          |
| YLR371W                                          | ROM2          | YER162C                 | RAD4          |
| YKL204W                                          | EAP1          | YDR310C                 | SUM1          |
| YPR120C                                          | CLB5          | YGL003C                 | CDH1          |
| YER116C                                          | SLX8          | YJR090C                 | GRR1          |
| YLR381W                                          | CTF3          | YNL307C                 | MCK1          |
| YKR072C                                          | SIS2          | YNR052C                 | POP2          |
| YLR119W                                          | SRN2          | YOR327C                 | SNC2          |
| YBR194W                                          | SOY1          | YLR381W                 | CTF3          |
| YPL024W                                          | RMI1          | YER040W                 | GLN3          |
| YDR080W                                          | VPS41         | YDL006W                 | PTC1          |
| YDR245W                                          | MNN10         | YGL212W                 | VAM7          |
| YIL076W                                          | SEC28         | YEL051W                 | VMA8          |
| YNL288W                                          | CAF40         | YBR107C                 | IML3          |
| YJL154C                                          | VPS35         | YPL161C                 | BEM4          |
| YOR001W                                          | RRP6          | YDR335W                 | MSN5          |
| YLR381W                                          | CTF3          | YGL252C                 | RTG2          |
| YDL020C                                          | RPN4          | YBR215W                 | HPC2          |
| YML016C                                          | PPZ1          | YJR135C                 | MCM22         |
| YDL116W                                          | NUP84         | YMR164C                 | MSS11         |
| YBR108W                                          | YBR108W       | YNL166C                 | BNI5          |
| YAL024C                                          | LTE1          | YJL183W                 | MNN11         |

| Predictions at threshold level 0.75 continued... |               |                         |               |
|--------------------------------------------------|---------------|-------------------------|---------------|
| Gene1 of predicted pair                          |               | Gene2 of predicted pair |               |
| Systematic Name                                  | Standard Name | Systematic Name         | Standard Name |
| YJR084W                                          | CSN12         | YLR032W                 | RAD5          |
| YIL034C                                          | CAP2          | YAR014C                 | BUD14         |
| YDR289C                                          | RTT103        | YOL081W                 | IRA2          |
| YGR241C                                          | YAP1802       | YNR006W                 | VPS27         |
| YDR254W                                          | CHL4          | YLR182W                 | SWI6          |
| YGL174W                                          | BUD13         | YBR215W                 | HPC2          |
| YLR192C                                          | HCR1          | YKR020W                 | VPS51         |
| YNL032W                                          | SIW14         | YOL121C                 | RPS19A        |
| YLR386W                                          | VAC14         | YDL184C                 | RPL41A        |
| YGL054C                                          | ERV14         | YPL234C                 | TFP3          |
| YBL102W                                          | SFT2          | YKR020W                 | VPS51         |
| YDR484W                                          | VPS52         | YPL195W                 | APL5          |
| YEL053C                                          | MAK10         | YGL253W                 | HXK2          |
| YGL066W                                          | SGF73         | YNL307C                 | MCK1          |
| YDR378C                                          | LSM6          | YDL226C                 | GCS1          |
| YNL297C                                          | MON2          | YJR040W                 | GEF1          |
| YJL110C                                          | GZF3          | YPR119W                 | CLB2          |
| YBR050C                                          | REG2          | YER027C                 | GAL83         |
| YGL133W                                          | ITC1          | YBL087C                 | RPL23A        |
| YHL031C                                          | GOS1          | YPL050C                 | MNN9          |
| YOR290C                                          | SNF2          | YKL126W                 | YPK1          |
| YGL124C                                          | MON1          | YBR036C                 | CSG2          |
| YOR290C                                          | SNF2          | YPL161C                 | BEM4          |
| YIL034C                                          | CAP2          | YPL253C                 | VIK1          |
| YOR270C                                          | VPH1          | YPL137C                 | GIP3          |
| YAL024C                                          | LTE1          | YBR036C                 | CSG2          |
| YMR224C                                          | MRE11         | YOR043W                 | WHI2          |
| YBR171W                                          | SEC66         | YFR036W                 | CDC26         |
| YPL178W                                          | CBC2          | YHR079C-A               | SAE3          |

| Predictions at threshold level 0.75 continued... |               |                         |               |
|--------------------------------------------------|---------------|-------------------------|---------------|
| Gene1 of predicted pair                          |               | Gene2 of predicted pair |               |
| Systematic Name                                  | Standard Name | Systematic Name         | Standard Name |
| YBR290W                                          | BSD2          | YLR337C                 | VRP1          |
| YHR200W                                          | RPN10         | YCR053W                 | THR4          |
| YNL199C                                          | GCR2          | YMR125W                 | STO1          |
| YGL115W                                          | SNF4          | YDL083C                 | RPS16B        |
| YBR217W                                          | ATG12         | YPL161C                 | BEM4          |
| YGL212W                                          | VAM7          | YPR046W                 | MCM16         |
| YLR337C                                          | VRP1          | YGR135W                 | PRE9          |
| YIL034C                                          | CAP2          | YPL018W                 | CTF19         |
| YPL253C                                          | VIK1          | YER049W                 | TPA1          |
| YFR031C-A                                        | RPL2A         | YOR043W                 | WHI2          |
| YFR031C-A                                        | RPL2A         | YJL154C                 | VPS35         |
| YOR337W                                          | TEA1          | YNL076W                 | MKS1          |
| YGR270W                                          | YTA7          | YDR155C                 | CPR1          |
| YDR439W                                          | LRS4          | YHR013C                 | ARD1          |
| YHL031C                                          | GOS1          | YMR038C                 | CCS1          |
| YMR273C                                          | ZDS1          | YFL047W                 | RGD2          |
| YJL053W                                          | PEP8          | YKR030W                 | GMH1          |
| YNL238W                                          | KEX2          | YJL140W                 | RPB4          |
| YDR448W                                          | ADA2          | YDR469W                 | SDC1          |
| YML071C                                          | COG8          | YMR214W                 | SCJ1          |
| YOR132W                                          | VPS17         | YGL115W                 | SNF4          |
| YLR064W                                          | YLR064W       | YPL246C                 | RBD2          |
| YDR363W-A                                        | SEM1          | YER139C                 | YER139C       |
| YDR108W                                          | GSG1          | YER120W                 | SCS2          |
| YOL067C                                          | RTG1          | YBR114W                 | RAD16         |
| YDR293C                                          | SSD1          | YKR020W                 | VPS51         |
| YDR335W                                          | MSN5          | YPR046W                 | MCM16         |
| YLR386W                                          | VAC14         | YOR066W                 | MSA1          |
| YGR108W                                          | CLB1          | YDL047W                 | SIT4          |

| Predictions at threshold level 0.75 continued... |               |                         |               |
|--------------------------------------------------|---------------|-------------------------|---------------|
| Gene1 of predicted pair                          |               | Gene2 of predicted pair |               |
| Systematic Name                                  | Standard Name | Systematic Name         | Standard Name |
| YPL057C                                          | SUR1          | YDR289C                 | RTT103        |
| YDL080C                                          | THI3          | YOR213C                 | SAS5          |
| YKR048C                                          | NAP1          | YLR182W                 | SWI6          |
| YOR033C                                          | EXO1          | YMR199W                 | CLN1          |
| YFR010W                                          | UBP6          | YKL126W                 | YPK1          |
| YGR270W                                          | YTA7          | YAL002W                 | VPS8          |
| YOL126C                                          | MDH2          | YBL079W                 | NUP170        |
| YLL007C                                          | YLL007C       | YML095C                 | RAD10         |
| YBR108W                                          | YBR108W       | YDR484W                 | VPS52         |
| YLR018C                                          | POM34         | YBL079W                 | NUP170        |
| YFR031C-A                                        | RPL2A         | YDL192W                 | ARF1          |
| YHR144C                                          | DCD1          | YMR201C                 | RAD14         |
| YDR363W-A                                        | SEM1          | YBL087C                 | RPL23A        |
| YJR063W                                          | RPA12         | YDR071C                 | PAA1          |
| YLR396C                                          | VPS33         | YPL045W                 | VPS16         |
| YJR090C                                          | GRR1          | YGL252C                 | RTG2          |
| YLR093C                                          | NYV1          | YBR036C                 | CSG2          |
| YGL095C                                          | VPS45         | YDR323C                 | PEP7          |
| YPL256C                                          | CLN2          | YGL031C                 | RPL24A        |
| YGR020C                                          | VMA7          | YDR153C                 | ENT5          |
| YBR042C                                          | CST26         | YGR105W                 | VMA21         |
| YDR363W-A                                        | SEM1          | YDR260C                 | SWM1          |
| YOR076C                                          | SKI7          | YOR145C                 | PNO1          |
| YBR194W                                          | SOY1          | YDL226C                 | GCS1          |
| YHR013C                                          | ARD1          | YNL238W                 | KEX2          |
| YML071C                                          | COG8          | YCR053W                 | THR4          |
| YOR023C                                          | AHC1          | YPL161C                 | BEM4          |
| YHR134W                                          | WSS1          | YGL151W                 | NUT1          |
| YDL184C                                          | RPL41A        | YPR030W                 | CSR2          |



| Predictions at threshold level 0.75 continued... |               |                         |               |
|--------------------------------------------------|---------------|-------------------------|---------------|
| Gene1 of predicted pair                          |               | Gene2 of predicted pair |               |
| Systematic Name                                  | Standard Name | Systematic Name         | Standard Name |
| YJL036W                                          | SNX4          | YJR060W                 | CBF1          |
| YHR156C                                          | LIN1          | YHR134W                 | WSS1          |
| YNL107W                                          | YAF9          | YOL081W                 | IRA2          |
| YBR215W                                          | HPC2          | YDR335W                 | MSN5          |
| YEL060C                                          | PRB1          | YMR230W                 | RPS10B        |
| YBR131W                                          | CCZ1          | YGR105W                 | VMA21         |
| YLR079W                                          | SIC1          | YML057W                 | CMP2          |
| YNL032W                                          | SIW14         | YDL192W                 | ARF1          |
| YGL178W                                          | MPT5          | YDL056W                 | MBP1          |
| YPL253C                                          | VIK1          | YAR014C                 | BUD14         |
| YLR234W                                          | TOP3          | YML103C                 | NUP188        |
| YMR127C                                          | SAS2          | YFR036W                 | CDC26         |
| YBR278W                                          | DPB3          | YBR036C                 | CSG2          |
| YML103C                                          | NUP188        | YDR254W                 | CHL4          |
| YHR205W                                          | SCH9          | YPL161C                 | BEM4          |
| YOR035C                                          | SHE4          | YJR084W                 | CSN12         |
| YLR371W                                          | ROM2          | YEL036C                 | ANP1          |
| YBR107C                                          | IML3          | YFR030W                 | MET10         |
| YDL101C                                          | DUN1          | YCR066W                 | RAD18         |
| YPR018W                                          | RLF2          | YPR131C                 | NAT3          |
| YOR127W                                          | RGA1          | YOR112W                 | CEX1          |
| YJL136C                                          | RPS21B        | YML095C                 | RAD10         |
| YOR035C                                          | SHE4          | YBR181C                 | RPS6B         |
| YOR337W                                          | TEA1          | YER116C                 | SLX8          |
| YMR216C                                          | SKY1          | YDL077C                 | VAM6          |
| YDL184C                                          | RPL41A        | YOL111C                 | MDY2          |
| YPL037C                                          | EGD1          | YPL105C                 | YPL105C       |
| YER001W                                          | MNN1          | YMR089C                 | YTA12         |
| YDR379W                                          | RGA2          | YGL038C                 | OCH1          |

| Predictions at threshold level 0.75 continued... |               |                         |               |
|--------------------------------------------------|---------------|-------------------------|---------------|
| Gene1 of predicted pair                          |               | Gene2 of predicted pair |               |
| Systematic Name                                  | Standard Name | Systematic Name         | Standard Name |
| YKL006W                                          | RPL14A        | YJL095W                 | BCK1          |
| YJR032W                                          | CPR7          | YJL190C                 | RPS22A        |
| YNR064C                                          | YNR064C       | YOR344C                 | TYE7          |
| YBR111W-A                                        | SUS1          | YMR273C                 | ZDS1          |
| YHR156C                                          | LIN1          | YMR230W                 | RPS10B        |
| YKL135C                                          | APL2          | YJR005W                 | APL1          |
| YKR048C                                          | NAP1          | YPL256C                 | CLN2          |
| YMR142C                                          | RPL13B        | YJL172W                 | CPS1          |
| YDR174W                                          | HMO1          | YCR086W                 | CSM1          |
| YLR435W                                          | TSR2          | YKL101W                 | HSL1          |
| YPL137C                                          | GIP3          | YMR214W                 | SCJ1          |
| YMR026C                                          | PEX12         | YNL032W                 | SIW14         |
| YMR216C                                          | SKY1          | YOL108C                 | INO4          |
| YGL078C                                          | DBP3          | YPL037C                 | EGD1          |
| YOR069W                                          | VPS5          | YKR030W                 | GMH1          |
| YOR112W                                          | CEX1          | YDR153C                 | ENT5          |
| YLR234W                                          | TOP3          | YBR194W                 | SOY1          |
| YJL124C                                          | LSM1          | YFR030W                 | MET10         |
| YLR079W                                          | SIC1          | YPL152W                 | RRD2          |
| YFR010W                                          | UBP6          | YLR386W                 | VAC14         |
| YCR065W                                          | HCM1          | YNL236W                 | SIN4          |
| YNL116W                                          | DMA2          | YLR182W                 | SWI6          |
| YKL126W                                          | YPK1          | YHR200W                 | RPN10         |
| YKL139W                                          | CTK1          | YDR261C                 | EXG2          |
| YLR381W                                          | CTF3          | YJR135C                 | MCM22         |
| YGR241C                                          | YAP1802       | YLR206W                 | ENT2          |
| YBR274W                                          | CHK1          | YCR086W                 | CSM1          |
| YNL291C                                          | MID1          | YGL163C                 | RAD54         |
| YGL124C                                          | MON1          | YNL076W                 | MKS1          |

| Predictions at threshold level 0.75 continued... |               |                         |               |
|--------------------------------------------------|---------------|-------------------------|---------------|
| Gene1 of predicted pair                          |               | Gene2 of predicted pair |               |
| Systematic Name                                  | Standard Name | Systematic Name         | Standard Name |
| YMR133W                                          | REC114        | YNL238W                 | KEX2          |
| YNL215W                                          | IES2          | YPL152W                 | RRD2          |
| YNL325C                                          | FIG4          | YPR036W                 | VMA13         |
| YML103C                                          | NUP188        | YOR358W                 | HAP5          |
| YDR260C                                          | SWM1          | YLR032W                 | RAD5          |
| YGL212W                                          | VAM7          | YOL108C                 | INO4          |
| YLR441C                                          | RPS1A         | YNL076W                 | MKS1          |
| YML115C                                          | VAN1          | YGL025C                 | PGD1          |
| YGL178W                                          | MPT5          | YBR231C                 | SWC5          |
| YDR477W                                          | SNF1          | YDL184C                 | RPL41A        |
| YJR056C                                          | YJR056C       | YBR019C                 | GAL10         |
| YPL057C                                          | SUR1          | YDR207C                 | UME6          |
| YGL060W                                          | YBP2          | YJR035W                 | RAD26         |
| YMR198W                                          | CIK1          | YML095C                 | RAD10         |
| YJL172W                                          | CPS1          | YOR066W                 | MSA1          |
| YPR017C                                          | DSS4          | YPR051W                 | MAK3          |
| YPL018W                                          | CTF19         | YHR114W                 | BZZ1          |
| YLR386W                                          | VAC14         | YFL023W                 | BUD27         |
| YNL069C                                          | RPL16B        | YOL108C                 | INO4          |
| YBR057C                                          | MUM2          | YGL200C                 | EMP24         |
| YDR137W                                          | RGP1          | YCL037C                 | SRO9          |
| YNL032W                                          | SIW14         | YDL083C                 | RPS16B        |
| YGR019W                                          | UGA1          | YDR310C                 | SUM1          |
| YKR035W-A                                        | DID2          | YDL077C                 | VAM6          |
| YOR001W                                          | RRP6          | YER063W                 | THO1          |
| YGL133W                                          | ITC1          | YHR200W                 | RPN10         |
| YFL013C                                          | IES1          | YOR001W                 | RRP6          |
| YNL106C                                          | INP52         | YBR228W                 | SLX1          |
| YEL050C                                          | RML2          | YDR254W                 | CHL4          |

| Predictions at threshold level 0.75 continued... |               |                         |               |
|--------------------------------------------------|---------------|-------------------------|---------------|
| Gene1 of predicted pair                          |               | Gene2 of predicted pair |               |
| Systematic Name                                  | Standard Name | Systematic Name         | Standard Name |
| YBR057C                                          | MUM2          | YER001W                 | MNN1          |
| YBL058W                                          | SHP1          | YPR046W                 | MCM16         |
| YOR337W                                          | TEA1          | YFR010W                 | UBP6          |
| YHR013C                                          | ARD1          | YLR410W                 | VIP1          |
| YJR140C                                          | HIR3          | YCR031C                 | RPS14A        |
| YIL159W                                          | BNR1          | YLR371W                 | ROM2          |
| YPL022W                                          | RAD1          | YOL090W                 | MSH2          |
| YMR216C                                          | SKY1          | YHL020C                 | OPI1          |
| YHR039C-A                                        | VMA10         | YBR036C                 | CSG2          |
| YLR090W                                          | XDJ1          | YNL076W                 | MKS1          |
| YLR292C                                          | SEC72         | YPL253C                 | VIK1          |
| YJR063W                                          | RPA12         | YLR357W                 | RSC2          |
| YER144C                                          | UBP5          | YER139C                 | YER139C       |
| YPL152W                                          | RRD2          | YJL006C                 | CTK2          |
| YDL020C                                          | RPN4          | YGR135W                 | PRE9          |
| YMR004W                                          | MVP1          | YJR033C                 | RAV1          |
| YBL058W                                          | SHP1          | YEL060C                 | PRB1          |
| YCR086W                                          | CSM1          | YMR038C                 | CCS1          |
| YMR026C                                          | PEX12         | YAL055W                 | PEX22         |
| YLR192C                                          | HCR1          | YLR180W                 | SAM1          |
| YML071C                                          | COG8          | YLR180W                 | SAM1          |
| YJL154C                                          | VPS35         | YLR371W                 | ROM2          |
| YLR090W                                          | XDJ1          | YOR043W                 | WHI2          |
| YHR119W                                          | SET1          | YBR279W                 | PAF1          |
| YDL083C                                          | RPS16B        | YOR066W                 | MSA1          |
| YBR131W                                          | CCZ1          | YMR054W                 | STV1          |
| YLR337C                                          | VRP1          | YGR019W                 | UGA1          |
| YER110C                                          | KAP123        | YPL018W                 | CTF19         |
| YJR135C                                          | MCM22         | YJL183W                 | MNN11         |

| Predictions at threshold level 0.75 continued... |               |                         |               |
|--------------------------------------------------|---------------|-------------------------|---------------|
| Gene1 of predicted pair                          |               | Gene2 of predicted pair |               |
| Systematic Name                                  | Standard Name | Systematic Name         | Standard Name |
| YML115C                                          | VAN1          | YPR119W                 | CLB2          |
| YGR054W                                          | YGR054W       | YJL095W                 | BCK1          |
| YMR198W                                          | CIK1          | YOR080W                 | DIA2          |
| YML109W                                          | ZDS2          | YHR061C                 | GIC1          |
| YBR030W                                          | YBR030W       | YDR261C                 | EXG2          |
| YDR004W                                          | RAD57         | YFL003C                 | MSH4          |
| YOR069W                                          | VPS5          | YER120W                 | SCS2          |
| YMR004W                                          | MVP1          | YGL054C                 | ERV14         |
| YPR084W                                          | YPR084W       | YPL234C                 | TFP3          |
| YJR135C                                          | MCM22         | YIL103W                 | DPH1          |
| YPR141C                                          | KAR3          | YHR056C                 | RSC30         |
| YOR005C                                          | DNL4          | YGL090W                 | LIF1          |
| YDR146C                                          | SWI5          | YER096W                 | SHC1          |
| YLR102C                                          | APC9          | YGL163C                 | RAD54         |
| YOR127W                                          | RGA1          | YMR199W                 | CLN1          |
| YPL057C                                          | SUR1          | YML071C                 | COG8          |
| YJL154C                                          | VPS35         | YPR032W                 | SRO7          |
| YDR507C                                          | GIN4          | YDR264C                 | AKR1          |
| YOL090W                                          | MSH2          | YML028W                 | TSA1          |
| YBR108W                                          | YBR108W       | YJL095W                 | BCK1          |
| YEL053C                                          | MAK10         | YCR086W                 | CSM1          |
| YGL212W                                          | VAM7          | YMR152W                 | YIM1          |
| YJL172W                                          | CPS1          | YGL003C                 | CDH1          |
| YOR069W                                          | VPS5          | YGR105W                 | VMA21         |
| YAL021C                                          | CCR4          | YHR056C                 | RSC30         |
| YLR386W                                          | VAC14         | YDR137W                 | RGP1          |
| YDR335W                                          | MSN5          | YKL160W                 | ELF1          |
| YJL030W                                          | MAD2          | YGL190C                 | CDC55         |
| YBL103C                                          | RTG3          | YDL223C                 | HBT1          |

| Predictions at threshold level 0.75 continued... |               |                         |               |
|--------------------------------------------------|---------------|-------------------------|---------------|
| Gene1 of predicted pair                          |               | Gene2 of predicted pair |               |
| Systematic Name                                  | Standard Name | Systematic Name         | Standard Name |
| YOL121C                                          | RPS19A        | YGL124C                 | MON1          |
| YJL124C                                          | LSM1          | YLR362W                 | STE11         |
| YML103C                                          | NUP188        | YGR188C                 | BUB1          |
| YNL248C                                          | RPA49         | YFR036W                 | CDC26         |
| YDR378C                                          | LSM6          | YGL115W                 | SNF4          |
| YCL063W                                          | VAC17         | YEL013W                 | VAC8          |
| YKR009C                                          | FOX2          | YOL147C                 | PEX11         |
| YDR293C                                          | SSD1          | YIL076W                 | SEC28         |
| YLR292C                                          | SEC72         | YDL155W                 | CLB3          |
| YNL307C                                          | MCK1          | YMR230W                 | RPS10B        |
| YKR020W                                          | VPS51         | YGL115W                 | SNF4          |
| YAL024C                                          | LTE1          | YDR318W                 | MCM21         |
| YMR004W                                          | MVP1          | YHR012W                 | VPS29         |
| YJR056C                                          | YJR056C       | YDR207C                 | UME6          |
| YLR018C                                          | POM34         | YDR358W                 | GGA1          |
| YLR292C                                          | SEC72         | YPR051W                 | MAK3          |
| YER116C                                          | SLX8          | YOL030W                 | GAS5          |
| YHR171W                                          | ATG7          | YLL042C                 | ATG10         |
| YPL195W                                          | APL5          | YOL108C                 | INO4          |
| YMR153W                                          | NUP53         | YBL079W                 | NUP170        |
| YOR127W                                          | RGA1          | YBR171W                 | SEC66         |
| YLR399C                                          | BDF1          | YFR036W                 | CDC26         |
| YIL053W                                          | RHR2          | YLR371W                 | ROM2          |
| YPL057C                                          | SUR1          | YDR076W                 | RAD55         |
| YKL117W                                          | SBA1          | YNL199C                 | GCR2          |
| YJL029C                                          | VPS53         | YAL030W                 | SNC1          |
| YGL087C                                          | MMS2          | YKR001C                 | VPS1          |
| YGR135W                                          | PRE9          | YOL054W                 | PSH1          |
| YDR496C                                          | PUF6          | YFR001W                 | LOC1          |

| Predictions at threshold level 0.75 continued... |               |                         |               |
|--------------------------------------------------|---------------|-------------------------|---------------|
| Gene1 of predicted pair                          |               | Gene2 of predicted pair |               |
| Systematic Name                                  | Standard Name | Systematic Name         | Standard Name |
| YMR313C                                          | TGL3          | YKL140W                 | TGL1          |
| YDL020C                                          | RPN4          | YDR225W                 | HTA1          |
| YGR020C                                          | VMA7          | YJR040W                 | GEF1          |
| YNR072W                                          | HXT17         | YCR053W                 | THR4          |
| YNL307C                                          | MCK1          | YPL037C                 | EGD1          |
| YJL172W                                          | CPS1          | YLR094C                 | GIS3          |
| YJL154C                                          | VPS35         | YDR183W                 | PLP1          |
| YHL031C                                          | GOS1          | YPL120W                 | VPS30         |
| YKR061W                                          | KTR2          | YFR036W                 | CDC26         |
| YIR009W                                          | MSL1          | YPR119W                 | CLB2          |
| YHR012W                                          | VPS29         | YLR309C                 | IMH1          |
| YLR119W                                          | SRN2          | YHR060W                 | VMA22         |
| YLR452C                                          | SST2          | YDR207C                 | UME6          |
| YHR134W                                          | WSS1          | YDL155W                 | CLB3          |
| YGL226C-A                                        | OST5          | YML019W                 | OST6          |
| YOR023C                                          | AHC1          | YGL237C                 | HAP2          |
| YPL246C                                          | RBD2          | YJL004C                 | SYS1          |
| YBR131W                                          | CCZ1          | YLR320W                 | MMS22         |
| YDR443C                                          | SSN2          | YDR146C                 | SWI5          |
| YGL147C                                          | RPL9A         | YPR046W                 | MCM16         |
| YBR200W                                          | BEM1          | YGL003C                 | CDH1          |
| YGR072W                                          | UPF3          | YEL043W                 | YEL043W       |
| YOR069W                                          | VPS5          | YHR012W                 | VPS29         |
| YDL116W                                          | NUP84         | YGL100W                 | SEH1          |
| YEL065W                                          | SIT1          | YHR039C-A               | VMA10         |
| YNL288W                                          | CAF40         | YBL021C                 | HAP3          |
| YFL023W                                          | BUD27         | YJR056C                 | YJR056C       |
| YKR020W                                          | VPS51         | YMR231W                 | PEP5          |
| YGR108W                                          | CLB1          | YNL166C                 | BNI5          |

| Predictions at threshold level 0.75 continued... |               |                         |               |
|--------------------------------------------------|---------------|-------------------------|---------------|
| Gene1 of predicted pair                          |               | Gene2 of predicted pair |               |
| Systematic Name                                  | Standard Name | Systematic Name         | Standard Name |
| YLR006C                                          | SSK1          | YOR127W                 | RGA1          |
| YGR249W                                          | MGA1          | YER144C                 | UBP5          |
| YBR200W                                          | BEM1          | YDR245W                 | MNN10         |
| YMR016C                                          | SOK2          | YLR371W                 | ROM2          |
| YLR182W                                          | SWI6          | YLR350W                 | ORM2          |
| YLR192C                                          | HCR1          | YGL003C                 | CDH1          |
| YKR099W                                          | BAS1          | YJR032W                 | CPR7          |
| YLR386W                                          | VAC14         | YGL115W                 | SNF4          |
| YNL325C                                          | FIG4          | YDL223C                 | HBT1          |
| YLR234W                                          | TOP3          | YGR270W                 | YTA7          |
| YPL129W                                          | TAF14         | YGR270W                 | YTA7          |
| YNL106C                                          | INP52         | YER096W                 | SHC1          |
| YLR234W                                          | TOP3          | YOR132W                 | VPS17         |
| YML103C                                          | NUP188        | YMR153W                 | NUP53         |
| YHR200W                                          | RPN10         | YDL192W                 | ARF1          |
| YGL174W                                          | BUD13         | YKL160W                 | ELF1          |
| YBR057C                                          | MUM2          | YGR188C                 | BUB1          |
| YDL059C                                          | RAD59         | YBR215W                 | HPC2          |
| YOR078W                                          | BUD21         | YBL072C                 | RPS8A         |
| YGL060W                                          | YBP2          | YLR079W                 | SIC1          |
| YBL103C                                          | RTG3          | YDR358W                 | GGA1          |
| YGL134W                                          | PCL10         | YPL219W                 | PCL8          |
| YGL124C                                          | MON1          | YGL253W                 | HXK2          |
| YJL149W                                          | YJL149W       | YDR139C                 | RUB1          |
| YLR083C                                          | EMP70         | YNL127W                 | FAR11         |
| YHR073W                                          | OSH3          | YMR125W                 | STO1          |
| YMR022W                                          | UBC7          | YPR119W                 | CLB2          |
| YDR383C                                          | NKP1          | YDR439W                 | LRS4          |
| YML103C                                          | NUP188        | YPL178W                 | CBC2          |



| Predictions at threshold level 0.75 continued... |               |                         |               |
|--------------------------------------------------|---------------|-------------------------|---------------|
| Gene1 of predicted pair                          |               | Gene2 of predicted pair |               |
| Systematic Name                                  | Standard Name | Systematic Name         | Standard Name |
| YML071C                                          | COG8          | YDR153C                 | ENT5          |
| YGR249W                                          | MGA1          | YBR171W                 | SEC66         |
| YPL042C                                          | SSN3          | YDL226C                 | GCS1          |
| YCR081W                                          | SRB8          | YJL154C                 | VPS35         |
| YIL148W                                          | RPL40A        | YCR024C-A               | PMP1          |
| YHL031C                                          | GOS1          | YEL042W                 | GDA1          |
| YHR052W                                          | CIC1          | YKL009W                 | MRT4          |
| YNL041C                                          | COG6          | YOR308C                 | SNU66         |
| YNL044W                                          | YIP3          | YNL041C                 | COG6          |
| YMR224C                                          | MRE11         | YBR280C                 | SAF1          |
| YDR004W                                          | RAD57         | YPL022W                 | RAD1          |
| YBR108W                                          | YBR108W       | YHR111W                 | UBA4          |
| YOR132W                                          | VPS17         | YJR040W                 | GEF1          |
| YGL115W                                          | SNF4          | YEL060C                 | PRB1          |
| YJL172W                                          | CPS1          | YMR152W                 | YIM1          |
| YMR284W                                          | YKU70         | YNL016W                 | PUB1          |
| YDR135C                                          | YCF1          | YGL181W                 | GTS1          |
| YDR443C                                          | SSN2          | YHR039C-A               | VMA10         |
| YCR088W                                          | ABP1          | YJL187C                 | SWE1          |
| YNL325C                                          | FIG4          | YMR016C                 | SOK2          |
| YOR156C                                          | NFI1          | YNL078W                 | NIS1          |
| YER115C                                          | SPR6          | YMR125W                 | STO1          |
| YPL024W                                          | RMI1          | YOR368W                 | RAD17         |
| YGR104C                                          | SRB5          | YDR289C                 | RTT103        |
| YJR056C                                          | YJR056C       | YPR036W                 | VMA13         |
| YIL034C                                          | CAP2          | YLR234W                 | TOP3          |
| YDR156W                                          | RPA14         | YMR205C                 | PFK2          |
| YLR090W                                          | XDJ1          | YKR099W                 | BAS1          |
| YMR179W                                          | SPT21         | YJR060W                 | CBF1          |

| Predictions at threshold level 0.75 continued... |               |                         |               |
|--------------------------------------------------|---------------|-------------------------|---------------|
| Gene1 of predicted pair                          |               | Gene2 of predicted pair |               |
| Systematic Name                                  | Standard Name | Systematic Name         | Standard Name |
| YBR200W                                          | BEM1          | YHR081W                 | LRP1          |
| YDR378C                                          | LSM6          | YCR077C                 | PAT1          |
| YOR270C                                          | VPH1          | YLR094C                 | GIS3          |
| YMR224C                                          | MRE11         | YNL106C                 | INP52         |
| YPR120C                                          | CLB5          | YNL107W                 | YAF9          |
| YPR030W                                          | CSR2          | YER162C                 | RAD4          |
| YOR043W                                          | WHI2          | YBR195C                 | MSI1          |
| YML115C                                          | VAN1          | YML028W                 | TSA1          |
| YER116C                                          | SLX8          | YMR311C                 | GLC8          |
| YDR293C                                          | SSD1          | YBL103C                 | RTG3          |
| YMR199W                                          | CLN1          | YHL011C                 | PRS3          |
| YLR386W                                          | VAC14         | YDL192W                 | ARF1          |
| YOR069W                                          | VPS5          | YJR033C                 | RAV1          |
| YDR156W                                          | RPA14         | YGR135W                 | PRE9          |
| YPL115C                                          | BEM3          | YPR051W                 | MAK3          |
| YDR440W                                          | DOT1          | YHR115C                 | DMA1          |
| YNL199C                                          | GCR2          | YER122C                 | GLO3          |
| YDR146C                                          | SWI5          | YOR290C                 | SNF2          |
| YKR020W                                          | VPS51         | YML001W                 | YPT7          |
| YHR060W                                          | VMA22         | YOL111C                 | MDY2          |
| YDR137W                                          | RGP1          | YEL027W                 | CUP5          |
| YKL007W                                          | CAP1          | YKL213C                 | DOA1          |
| YNL051W                                          | COG5          | YKL119C                 | VPH2          |
| YNR052C                                          | POP2          | YNL107W                 | YAF9          |
| YGL078C                                          | DBP3          | YBR200W                 | BEM1          |
| YFR024C-A                                        | LSB3          | YBR108W                 | YBR108W       |
| YDL020C                                          | RPN4          | YKL139W                 | CTK1          |
| YIR025W                                          | MND2          | YGL003C                 | CDH1          |
| YJL176C                                          | SWI3          | YDR378C                 | LSM6          |

| Predictions at threshold level 0.75 continued... |               |                         |               |
|--------------------------------------------------|---------------|-------------------------|---------------|
| Gene1 of predicted pair                          |               | Gene2 of predicted pair |               |
| Systematic Name                                  | Standard Name | Systematic Name         | Standard Name |
| YCL001W                                          | RER1          | YNL107W                 | YAF9          |
| YDL116W                                          | NUP84         | YKL048C                 | ELM1          |
| YBR290W                                          | BSD2          | YHR114W                 | BZZ1          |
| YGR135W                                          | PRE9          | YBL101C                 | ECM21         |
| YCR031C                                          | RPS14A        | YGL019W                 | CKB1          |
| YLR360W                                          | VPS38         | YDR318W                 | MCM21         |
| YPL042C                                          | SSN3          | YNL297C                 | MON2          |
| YER068W                                          | MOT2          | YLR357W                 | RSC2          |
| YLR192C                                          | HCR1          | YLR371W                 | ROM2          |
| YMR004W                                          | MVP1          | YKR030W                 | GMH1          |
| YFR036W                                          | CDC26         | YKL101W                 | HSL1          |
| YDL184C                                          | RPL41A        | YJR032W                 | CPR7          |
| YGR003W                                          | CUL3          | YLR306W                 | UBC12         |
| YGR135W                                          | PRE9          | YKL101W                 | HSL1          |
| YJL053W                                          | PEP8          | YJR060W                 | CBF1          |
| YLR360W                                          | VPS38         | YMR311C                 | GLC8          |
| YBR126C                                          | TPS1          | YKL139W                 | CTK1          |
| YBR200W                                          | BEM1          | YLR320W                 | MMS22         |
| YDL116W                                          | NUP84         | YBR200W                 | BEM1          |
| YPL137C                                          | GIP3          | YHR081W                 | LRP1          |
| YAL024C                                          | LTE1          | YOR035C                 | SHE4          |
| YNL087W                                          | TCB2          | YHR060W                 | VMA22         |
| YNL166C                                          | BNI5          | YPR046W                 | MCM16         |
| YGL003C                                          | CDH1          | YMR311C                 | GLC8          |
| YPR154W                                          | PIN3          | YHR016C                 | YSC84         |
| YHR129C                                          | ARP1          | YHR098C                 | SFB3          |
| YLR119W                                          | SRN2          | YMR026C                 | PEX12         |
| YLL007C                                          | YLL007C       | YOR023C                 | AHC1          |
| YKL139W                                          | CTK1          | YOL051W                 | GAL11         |

| Predictions at threshold level 0.75 continued... |               |                         |               |
|--------------------------------------------------|---------------|-------------------------|---------------|
| Gene1 of predicted pair                          |               | Gene2 of predicted pair |               |
| Systematic Name                                  | Standard Name | Systematic Name         | Standard Name |
| YBR009C                                          | HHF1          | YER068W                 | MOT2          |
| YOR112W                                          | CEX1          | YDR310C                 | SUM1          |
| YPL125W                                          | KAP120        | YBL079W                 | NUP170        |
| YCR020C-A                                        | MAK31         | YJL154C                 | VPS35         |
| YDR318W                                          | MCM21         | YPR119W                 | CLB2          |
| YDR130C                                          | FIN1          | YCR086W                 | CSM1          |
| YLR337C                                          | VRP1          | YOR213C                 | SAS5          |
| YJL154C                                          | VPS35         | YMR004W                 | MVP1          |
| YDR183W                                          | PLP1          | YNL225C                 | CNM67         |
| YMR142C                                          | RPL13B        | YOR035C                 | SHE4          |
| YML038C                                          | YMD8          | YPL120W                 | VPS30         |
| YNL264C                                          | PDR17         | YPL180W                 | TCO89         |
| YLR362W                                          | STE11         | YJL128C                 | PBS2          |
| YOR035C                                          | SHE4          | YAL002W                 | VPS8          |
| YLR386W                                          | VAC14         | YIR005W                 | IST3          |
| YPL161C                                          | BEM4          | YMR311C                 | GLC8          |
| YER016W                                          | BIM1          | YHR056C                 | RSC30         |
| YDR244W                                          | PEX5          | YAR042W                 | SWH1          |
| YDR477W                                          | SNF1          | YLR180W                 | SAM1          |
| YDR129C                                          | SAC6          | YOR312C                 | RPL20B        |
| YBR131W                                          | CCZ1          | YNL044W                 | YIP3          |
| YMR224C                                          | MRE11         | YDR289C                 | RTT103        |
| YDR484W                                          | VPS52         | YPL037C                 | EGD1          |
| YOR069W                                          | VPS5          | YPL234C                 | TFP3          |
| YGL115W                                          | SNF4          | YDL155W                 | CLB3          |
| YNL087W                                          | TCB2          | YEL053C                 | MAK10         |
| YLR370C                                          | ARC18         | YBR036C                 | CSG2          |
| YDL116W                                          | NUP84         | YCR086W                 | CSM1          |
| YLR386W                                          | VAC14         | YPL137C                 | GIP3          |

| Predictions at threshold level 0.75 continued... |               |                         |               |
|--------------------------------------------------|---------------|-------------------------|---------------|
| Gene1 of predicted pair                          |               | Gene2 of predicted pair |               |
| Systematic Name                                  | Standard Name | Systematic Name         | Standard Name |
| YER110C                                          | KAP123        | YGR270W                 | YTA7          |
| YGL066W                                          | SGF73         | YKL101W                 | HSL1          |
| YBR200W                                          | BEM1          | YGR270W                 | YTA7          |
| YBR200W                                          | BEM1          | YEL056W                 | HAT2          |
| YGR249W                                          | MGA1          | YDR207C                 | UME6          |
| YHR060W                                          | VMA22         | YJL004C                 | SYS1          |
| YNL094W                                          | APP1          | YKL129C                 | MYO3          |
| YOR001W                                          | RRP6          | YKL160W                 | ELF1          |
| YGR217W                                          | CCH1          | YBR082C                 | UBC4          |
| YOR290C                                          | SNF2          | YJL140W                 | RPB4          |
| YEL065W                                          | SIT1          | YDR443C                 | SSN2          |
| YEL051W                                          | VMA8          | YDL077C                 | VAM6          |
| YBR200W                                          | BEM1          | YDL006W                 | PTC1          |
| YBR200W                                          | BEM1          | YHR013C                 | ARD1          |
| YLR234W                                          | TOP3          | YCR077C                 | PAT1          |
| YJR060W                                          | CBF1          | YGR105W                 | VMA21         |
| YDL020C                                          | RPN4          | YBR107C                 | IML3          |
| YDR137W                                          | RGP1          | YBL025W                 | RRN10         |
| YER116C                                          | SLX8          | YDL184C                 | RPL41A        |
| YOR197W                                          | MCA1          | YHR161C                 | YAP1801       |
| YDL020C                                          | RPN4          | YMR127C                 | SAS2          |
| YLR083C                                          | EMP70         | YOR109W                 | INP53         |
| YPL161C                                          | BEM4          | YOR066W                 | MSA1          |
| YDL013W                                          | SLX5          | YDR076W                 | RAD55         |
| YNL288W                                          | CAF40         | YLR447C                 | VMA6          |
| YKL139W                                          | CTK1          | YGL115W                 | SNF4          |
| YOL051W                                          | GAL11         | YHR200W                 | RPN10         |
| YMR026C                                          | PEX12         | YNL325C                 | FIG4          |
| YBL102W                                          | SFT2          | YPL105C                 | YPL105C       |

| Predictions at threshold level 0.75 continued... |               |                         |               |
|--------------------------------------------------|---------------|-------------------------|---------------|
| Gene1 of predicted pair                          |               | Gene2 of predicted pair |               |
| Systematic Name                                  | Standard Name | Systematic Name         | Standard Name |
| YNL032W                                          | SIW14         | YER122C                 | GLO3          |
| YGL178W                                          | MPT5          | YGR229C                 | SMI1          |
| YDL083C                                          | RPS16B        | YMR152W                 | YIM1          |
| YBR108W                                          | YBR108W       | YPL253C                 | VIK1          |
| YPL240C                                          | HSP82         | YDR545W                 | YRF1-1        |
| YDL116W                                          | NUP84         | YNL248C                 | RPA49         |
| YLR337C                                          | VRP1          | YHR134W                 | WSS1          |
| YDL116W                                          | NUP84         | YPL253C                 | VIK1          |
| YLR216C                                          | CPR6          | YOR195W                 | SLK19         |
| YPR018W                                          | RLF2          | YLR150W                 | STM1          |
| YAL020C                                          | ATS1          | YKR020W                 | VPS51         |
| YLR102C                                          | APC9          | YBL047C                 | EDE1          |
| YDR202C                                          | RAV2          | YGL115W                 | SNF4          |
| YPR036W                                          | VMA13         | YGR105W                 | VMA21         |
| YPL022W                                          | RAD1          | YLR320W                 | MMS22         |
| YNL291C                                          | MID1          | YOR127W                 | RGA1          |
| YFR030W                                          | MET10         | YLR182W                 | SWI6          |
| YIL159W                                          | BNR1          | YBR200W                 | BEM1          |
| YDR320C                                          | SWA2          | YKR020W                 | VPS51         |
| YGR249W                                          | MGA1          | YBR280C                 | SAF1          |
| YMR127C                                          | SAS2          | YAL002W                 | VPS8          |
| YMR224C                                          | MRE11         | YMR152W                 | YIM1          |
| YBR030W                                          | YBR030W       | YFL023W                 | BUD27         |
| YPL253C                                          | VIK1          | YOL054W                 | PSH1          |
| YDR253C                                          | MET32         | YPR120C                 | CLB5          |
| YBR019C                                          | GAL10         | YBR036C                 | CSG2          |
| YCR097W                                          | HMRA1         | YPL240C                 | HSP82         |
| YLR452C                                          | SST2          | YCR053W                 | THR4          |
| YHL025W                                          | SNF6          | YOR038C                 | HIR2          |

| Predictions at threshold level 0.75 continued... |               |                         |               |
|--------------------------------------------------|---------------|-------------------------|---------------|
| Gene1 of predicted pair                          |               | Gene2 of predicted pair |               |
| Systematic Name                                  | Standard Name | Systematic Name         | Standard Name |
| YDR383C                                          | NKP1          | YPL152W                 | RRD2          |
| YGL212W                                          | VAM7          | YKL041W                 | VPS24         |
| YPR036W                                          | VMA13         | YLR452C                 | SST2          |
| YDR507C                                          | GIN4          | YBL047C                 | EDE1          |
| YDR260C                                          | SWM1          | YDR318W                 | MCM21         |
| YLR410W                                          | VIP1          | YDR200C                 | VPS64         |
| YBL058W                                          | SHP1          | YER144C                 | UBP5          |
| YIL036W                                          | CST6          | YOL054W                 | PSH1          |
| YML062C                                          | MFT1          | YCL011C                 | GBP2          |
| YCL010C                                          | SGF29         | YPL248C                 | GAL4          |
| YDR137W                                          | RGP1          | YML071C                 | COG8          |
| YPR089W                                          | YPR089W       | YKR001C                 | VPS1          |
| YOR156C                                          | NFI1          | YOL145C                 | CTR9          |
| YGR105W                                          | VMA21         | YDR310C                 | SUM1          |
| YBR019C                                          | GAL10         | YCR053W                 | THR4          |
| YMR039C                                          | SUB1          | YJR060W                 | CBF1          |
| YLR441C                                          | RPS1A         | YGL025C                 | PGD1          |
| YBR173C                                          | UMP1          | YJR084W                 | CSN12         |
| YHR178W                                          | STB5          | YPL001W                 | HAT1          |
| YDR225W                                          | HTA1          | YOR023C                 | AHC1          |
| YDR103W                                          | STE5          | YJL157C                 | FAR1          |
| YLR386W                                          | VAC14         | YOR156C                 | NFI1          |
| YKL048C                                          | ELM1          | YOL054W                 | PSH1          |
| YBR171W                                          | SEC66         | YDR310C                 | SUM1          |
| YLR447C                                          | VMA6          | YGR270W                 | YTA7          |
| YOL136C                                          | PFK27         | YGR209C                 | TRX2          |
| YPL234C                                          | TFP3          | YJL095W                 | BCK1          |
| YPR052C                                          | NHP6A         | YBR240C                 | THI2          |
| YGL054C                                          | ERV14         | YER122C                 | GLO3          |

| Predictions at threshold level 0.75 continued... |               |                         |               |
|--------------------------------------------------|---------------|-------------------------|---------------|
| Gene1 of predicted pair                          |               | Gene2 of predicted pair |               |
| Systematic Name                                  | Standard Name | Systematic Name         | Standard Name |
| YMR153W                                          | NUP53         | YGL016W                 | KAP122        |
| YGL175C                                          | SAE2          | YOR368W                 | RAD17         |
| YLR090W                                          | XDJ1          | YOR290C                 | SNF2          |
| YDR260C                                          | SWM1          | YML028W                 | TSA1          |
| YCR086W                                          | CSM1          | YLR254C                 | NDL1          |
| YIL159W                                          | BNR1          | YDR309C                 | GIC2          |
| YPR120C                                          | CLB5          | YHR158C                 | KEL1          |
| YOR290C                                          | SNF2          | YMR214W                 | SCJ1          |
| YLR288C                                          | MEC3          | YNL291C                 | MID1          |
| YGR249W                                          | MGA1          | YPL137C                 | GIP3          |
| YNL297C                                          | MON2          | YEL043W                 | YEL043W       |
| YHL031C                                          | GOS1          | YDR440W                 | DOT1          |
| YBR215W                                          | HPC2          | YHR167W                 | THP2          |
| YJL124C                                          | LSM1          | YHR039C-A               | VMA10         |
| YDL223C                                          | HBT1          | YLR093C                 | NYV1          |
| YOR124C                                          | UBP2          | YNL107W                 | YAF9          |
| YIL053W                                          | RHR2          | YPL057C                 | SUR1          |
| YBL047C                                          | EDE1          | YHR115C                 | DMA1          |
| YCR031C                                          | RPS14A        | YDR310C                 | SUM1          |
| YFR031C-A                                        | RPL2A         | YBR217W                 | ATG12         |
| YLR381W                                          | CTF3          | YLR447C                 | VMA6          |
| YER116C                                          | SLX8          | YLR320W                 | MMS22         |
| YDR254W                                          | CHL4          | YOL054W                 | PSH1          |
| YKR020W                                          | VPS51         | YKR030W                 | GMH1          |
| YBL002W                                          | HTB2          | YNL030W                 | HHF2          |
| YDR254W                                          | CHL4          | YPL106C                 | SSE1          |
| YDR363W-A                                        | SEM1          | YJR060W                 | CBF1          |
| YBR126C                                          | TPS1          | YMR142C                 | RPL13B        |
| YGL066W                                          | SGF73         | YNL238W                 | KEX2          |



| Predictions at threshold level 0.75 continued... |               |                         |               |
|--------------------------------------------------|---------------|-------------------------|---------------|
| Gene1 of predicted pair                          |               | Gene2 of predicted pair |               |
| Systematic Name                                  | Standard Name | Systematic Name         | Standard Name |
| YJL053W                                          | PEP8          | YPL234C                 | TFP3          |
| YMR004W                                          | MVP1          | YPL037C                 | EGD1          |
| YLR337C                                          | VRP1          | YMR116C                 | ASC1          |
| YJL154C                                          | VPS35         | YPL234C                 | TFP3          |
| YPL106C                                          | SSE1          | YGL003C                 | CDH1          |
| YLR399C                                          | BDF1          | YJL006C                 | CTK2          |
| YBR215W                                          | HPC2          | YJR090C                 | GRR1          |
| YJR032W                                          | CPR7          | YLR180W                 | SAM1          |
| YHR178W                                          | STB5          | YDR310C                 | SUM1          |
| YER110C                                          | KAP123        | YOL067C                 | RTG1          |
| YPL024W                                          | RMI1          | YLR398C                 | SKI2          |
| YHR114W                                          | BZZ1          | YKR030W                 | GMH1          |
| YBL051C                                          | PIN4          | YGL237C                 | HAP2          |
| YGR104C                                          | SRB5          | YCL037C                 | SRO9          |
| YOR327C                                          | SNC2          | YJR033C                 | RAV1          |
| YBR126C                                          | TPS1          | YPL161C                 | BEM4          |
| YDR146C                                          | SWI5          | YGR252W                 | GCN5          |
| YGL115W                                          | SNF4          | YNL230C                 | ELA1          |
| YML115C                                          | VAN1          | YOR327C                 | SNC2          |
| YDR146C                                          | SWI5          | YMR311C                 | GLC8          |
| YOR195W                                          | SLK19         | YLR182W                 | SWI6          |
| YBR195C                                          | MSI1          | YPR119W                 | CLB2          |
| YDR477W                                          | SNF1          | YJR090C                 | GRR1          |
| YDR137W                                          | RGP1          | YJR135C                 | MCM22         |
| YFL023W                                          | BUD27         | YNL238W                 | KEX2          |
| YLR360W                                          | VPS38         | YDL006W                 | PTC1          |
| YBR107C                                          | IML3          | YGL003C                 | CDH1          |
| YIL008W                                          | URM1          | YDL047W                 | SIT4          |
| YPR051W                                          | MAK3          | YNL238W                 | KEX2          |

| Predictions at threshold level 0.75 continued... |               |                         |               |
|--------------------------------------------------|---------------|-------------------------|---------------|
| Gene1 of predicted pair                          |               | Gene2 of predicted pair |               |
| Systematic Name                                  | Standard Name | Systematic Name         | Standard Name |
| YDR071C                                          | PAA1          | YOR368W                 | RAD17         |
| YLR381W                                          | CTF3          | YLR315W                 | NKP2          |
| YBL021C                                          | HAP3          | YDR144C                 | MKC7          |
| YDR156W                                          | RPA14         | YLR399C                 | BDF1          |
| YNL325C                                          | FIG4          | YMR133W                 | REC114        |
| YDR183W                                          | PLP1          | YGL124C                 | MON1          |
| YDL042C                                          | SIR2          | YDR110W                 | FOB1          |
| YDR293C                                          | SSD1          | YOL018C                 | TLG2          |
| YLR441C                                          | RPS1A         | YBR019C                 | GAL10         |
| YML067C                                          | ERV41         | YLR093C                 | NYV1          |
| YOR337W                                          | TEA1          | YKL048C                 | ELM1          |
| YKR001C                                          | VPS1          | YNL041C                 | COG6          |
| YCR020C-A                                        | MAK31         | YHR039C-A               | VMA10         |
| YCL037C                                          | SRO9          | YNL107W                 | YAF9          |
| YMR116C                                          | ASC1          | YCR077C                 | PAT1          |
| YGR275W                                          | RTT102        | YBR289W                 | SNF5          |
| YFR010W                                          | UBP6          | YLR234W                 | TOP3          |
| YBR215W                                          | HPC2          | YGL151W                 | NUT1          |
| YER116C                                          | SLX8          | YBR082C                 | UBC4          |
| YKL139W                                          | CTK1          | YOR038C                 | HIR2          |
| YDR080W                                          | VPS41         | YOR109W                 | INP53         |
| YGL087C                                          | MMS2          | YGL237C                 | HAP2          |
| YHR134W                                          | WSS1          | YLR135W                 | SLX4          |
| YGR100W                                          | MDR1          | YNR049C                 | MSO1          |
| YDR395W                                          | SXM1          | YDR335W                 | MSN5          |
| YPR017C                                          | DSS4          | YER162C                 | RAD4          |
| YAL024C                                          | LTE1          | YIL159W                 | BNR1          |
| YHR039C-A                                        | VMA10         | YAL002W                 | VPS8          |
| YBR057C                                          | MUM2          | YKR020W                 | VPS51         |

| Predictions at threshold level 0.75 continued... |               |                         |               |
|--------------------------------------------------|---------------|-------------------------|---------------|
| Gene1 of predicted pair                          |               | Gene2 of predicted pair |               |
| Systematic Name                                  | Standard Name | Systematic Name         | Standard Name |
| YJL176C                                          | SWI3          | YPL057C                 | SUR1          |
| YNR052C                                          | POP2          | YLR386W                 | VAC14         |
| YOR106W                                          | VAM3          | YGR105W                 | VMA21         |
| YPL213W                                          | LEA1          | YIR005W                 | IST3          |
| YPL120W                                          | VPS30         | YAR014C                 | BUD14         |
| YNL307C                                          | MCK1          | YAR014C                 | BUD14         |
| YML115C                                          | VAN1          | YMR214W                 | SCJ1          |
| YPL137C                                          | GIP3          | YGL003C                 | CDH1          |
| YLR398C                                          | SKI2          | YKL041W                 | VPS24         |
| YPL161C                                          | BEM4          | YJL183W                 | MNN11         |
| YOR106W                                          | VAM3          | YGL212W                 | VAM7          |
| YPL203W                                          | TPK2          | YER068W                 | MOT2          |
| YDR439W                                          | LRS4          | YIR005W                 | IST3          |
| YAL024C                                          | LTE1          | YOR308C                 | SNU66         |
| YDR293C                                          | SSD1          | YHR114W                 | BZZ1          |
| YLR119W                                          | SRN2          | YHR081W                 | LRP1          |
| YGL087C                                          | MMS2          | YDR225W                 | HTA1          |
| YGL033W                                          | HOP2          | YPL161C                 | BEM4          |
| YPR046W                                          | MCM16         | YDR310C                 | SUM1          |
| YGR104C                                          | SRB5          | YIR005W                 | IST3          |
| YDL020C                                          | RPN4          | YDR289C                 | RTT103        |
| YFR036W                                          | CDC26         | YML112W                 | CTK3          |
| YLR083C                                          | EMP70         | YEL051W                 | VMA8          |
| YJL036W                                          | SNX4          | YPL037C                 | EGD1          |
| YIL034C                                          | CAP2          | YNL288W                 | CAF40         |
| YMR095C                                          | SNO1          | YKL139W                 | CTK1          |
| YDL116W                                          | NUP84         | YNL218W                 | MGS1          |
| YJL172W                                          | CPS1          | YJL183W                 | MNN11         |
| YDL223C                                          | HBT1          | YPL050C                 | MNN9          |

| Predictions at threshold level 0.75 continued... |               |                         |               |
|--------------------------------------------------|---------------|-------------------------|---------------|
| Gene1 of predicted pair                          |               | Gene2 of predicted pair |               |
| Systematic Name                                  | Standard Name | Systematic Name         | Standard Name |
| YBR200W                                          | BEM1          | YDR378C                 | LSM6          |
| YDL020C                                          | RPN4          | YFL023W                 | BUD27         |
| YER118C                                          | SHO1          | YLR398C                 | SKI2          |
| YOR275C                                          | RIM20         | YPL161C                 | BEM4          |
| YNL032W                                          | SIW14         | YBL103C                 | RTG3          |
| YMR133W                                          | REC114        | YPR046W                 | MCM16         |
| YKL116C                                          | PRR1          | YIL076W                 | SEC28         |
| YIL034C                                          | CAP2          | YEL053C                 | MAK10         |
| YDR225W                                          | HTA1          | YJR060W                 | CBF1          |
| YBR200W                                          | BEM1          | YKL119C                 | VPH2          |
| YPL198W                                          | RPL7B         | YER102W                 | RPS8B         |
| YKR035W-A                                        | DID2          | YML001W                 | YPT7          |
| YDR200C                                          | VPS64         | YPR119W                 | CLB2          |
| YLR148W                                          | PEP3          | YBR127C                 | VMA2          |
| YNL325C                                          | FIG4          | YLR371W                 | ROM2          |
| YML103C                                          | NUP188        | YGR059W                 | SPR3          |
| YMR224C                                          | MRE11         | YLR094C                 | GIS3          |
| YOR106W                                          | VAM3          | YOR008C                 | SLG1          |
| YMR142C                                          | RPL13B        | YBL103C                 | RTG3          |
| YBR217W                                          | ATG12         | YHR060W                 | VMA22         |
| YHL020C                                          | OPI1          | YHR039C-A               | VMA10         |
| YML016C                                          | PPZ1          | YBR171W                 | SEC66         |
| YGL135W                                          | RPL1B         | YHR013C                 | ARD1          |
| YGL087C                                          | MMS2          | YOR127W                 | RGA1          |
| YLR043C                                          | TRX1          | YKR001C                 | VPS1          |
| YLR254C                                          | NDL1          | YNL225C                 | CNM67         |
| YDR004W                                          | RAD57         | YGL151W                 | NUT1          |
| YDR507C                                          | GIN4          | YGL031C                 | RPL24A        |
| YHL011C                                          | PRS3          | YHR158C                 | KEL1          |

| Predictions at threshold level 0.75 continued... |               |                         |               |
|--------------------------------------------------|---------------|-------------------------|---------------|
| Gene1 of predicted pair                          |               | Gene2 of predicted pair |               |
| Systematic Name                                  | Standard Name | Systematic Name         | Standard Name |
| YPR032W                                          | SRO7          | YKR030W                 | GMH1          |
| YPR046W                                          | MCM16         | YLR233C                 | EST1          |
| YDR443C                                          | SSN2          | YDR310C                 | SUM1          |
| YGR249W                                          | MGA1          | YLR371W                 | ROM2          |
| YER044C                                          | ERG28         | YHR200W                 | RPN10         |
| YIL159W                                          | BNR1          | YHR111W                 | UBA4          |
| YOR043W                                          | WHI2          | YPR030W                 | CSR2          |
| YML012W                                          | ERV25         | YNL049C                 | SFB2          |
| YLR337C                                          | VRP1          | YBR171W                 | SEC66         |
| YNL106C                                          | INP52         | YDR318W                 | MCM21         |
| YFL023W                                          | BUD27         | YOL111C                 | MDY2          |
| YOR337W                                          | TEA1          | YGL078C                 | DBP3          |
| YPR084W                                          | YPR084W       | YGR105W                 | VMA21         |
| YDR448W                                          | ADA2          | YNR052C                 | POP2          |
| YLR083C                                          | EMP70         | YHR039C-A               | VMA10         |
| YLR292C                                          | SEC72         | YDR155C                 | CPR1          |
| YGL153W                                          | PEX14         | YKR020W                 | VPS51         |
| YML115C                                          | VAN1          | YHR013C                 | ARD1          |
| YCR020C-A                                        | MAK31         | YJR060W                 | CBF1          |
| YDR448W                                          | ADA2          | YNL206C                 | RTT106        |
| YBR280C                                          | SAF1          | YLR180W                 | SAM1          |
| YDL239C                                          | ADY3          | YOR177C                 | MPC54         |
| YHR171W                                          | ATG7          | YPL149W                 | ATG5          |
| YDL002C                                          | NHP10         | YER139C                 | YER139C       |
| YBL051C                                          | PIN4          | YEL056W                 | HAT2          |
| YLR079W                                          | SIC1          | YKL117W                 | SBA1          |
| YIL159W                                          | BNR1          | YKL139W                 | CTK1          |
| YDR103W                                          | STE5          | YBL016W                 | FUS3          |
| YHR039C-A                                        | VMA10         | YEL056W                 | HAT2          |

| Predictions at threshold level 0.75 continued... |               |                         |               |
|--------------------------------------------------|---------------|-------------------------|---------------|
| Gene1 of predicted pair                          |               | Gene2 of predicted pair |               |
| Systematic Name                                  | Standard Name | Systematic Name         | Standard Name |
| YEL065W                                          | SIT1          | YGL124C                 | MON1          |
| YMR153W                                          | NUP53         | YDR358W                 | GGA1          |
| YGL163C                                          | RAD54         | YMR231W                 | PEP5          |
| YGL250W                                          | RMR1          | YJR032W                 | CPR7          |
| YFR010W                                          | UBP6          | YOL111C                 | MDY2          |
| YEL065W                                          | SIT1          | YKR035W-A               | DID2          |
| YLR064W                                          | YLR064W       | YNL238W                 | KEX2          |
| YOL054W                                          | PSH1          | YNL107W                 | YAF9          |
| YMR095C                                          | SNO1          | YLR386W                 | VAC14         |
| YPL037C                                          | EGD1          | YLR094C                 | GIS3          |
| YBR200W                                          | BEM1          | YPL161C                 | BEM4          |
| YIL007C                                          | NAS2          | YLR324W                 | PEX30         |
| YLR138W                                          | NHA1          | YML132W                 | COS3          |
| YJL052W                                          | TDH1          | YPR119W                 | CLB2          |
| YMR055C                                          | BUB2          | YNL079C                 | TPM1          |
| YPR029C                                          | APL4          | YPL259C                 | APM1          |
| YDR144C                                          | MKC7          | YJR090C                 | GRR1          |
| YGL147C                                          | RPL9A         | YKR099W                 | BAS1          |
| YPR084W                                          | YPR084W       | YER122C                 | GLO3          |
| YLR083C                                          | EMP70         | YLR360W                 | VPS38         |
| YBR107C                                          | IML3          | YOR141C                 | ARP8          |
| YOR043W                                          | WHI2          | YMR230W                 | RPS10B        |
| YGL250W                                          | RMR1          | YJR135C                 | MCM22         |
| YML001W                                          | YPT7          | YDR153C                 | ENT5          |
| YIL159W                                          | BNR1          | YOR035C                 | SHE4          |
| YPL256C                                          | CLN2          | YLR182W                 | SWI6          |
| YJR140C                                          | HIR3          | YOR080W                 | DIA2          |
| YBL103C                                          | RTG3          | YBL025W                 | RRN10         |
| YER116C                                          | SLX8          | YER139C                 | YER139C       |

| Predictions at threshold level 0.75 continued... |               |                         |               |
|--------------------------------------------------|---------------|-------------------------|---------------|
| Gene1 of predicted pair                          |               | Gene2 of predicted pair |               |
| Systematic Name                                  | Standard Name | Systematic Name         | Standard Name |
| YPL161C                                          | BEM4          | YCR053W                 | THR4          |
| YML109W                                          | ZDS2          | YKR095W                 | MLP1          |
| YML115C                                          | VAN1          | YJL006C                 | CTK2          |
| YER122C                                          | GLO3          | YPR032W                 | SRO7          |
| YOL111C                                          | MDY2          | YLR398C                 | SKI2          |
| YLL039C                                          | UBI4          | YDR378C                 | LSM6          |
| YAL024C                                          | LTE1          | YPL018W                 | CTF19         |
| YBR082C                                          | UBC4          | YJR035W                 | RAD26         |
| YFL023W                                          | BUD27         | YJL095W                 | BCK1          |
| YGR249W                                          | MGA1          | YML115C                 | VAN1          |
| YMR004W                                          | MVP1          | YMR054W                 | STV1          |
| YDR076W                                          | RAD55         | YDR310C                 | SUM1          |
| YDR382W                                          | RPP2B         | YDR378C                 | LSM6          |
| YGR104C                                          | SRB5          | YER068W                 | MOT2          |
| YPR084W                                          | YPR084W       | YIR005W                 | IST3          |
| YDR129C                                          | SAC6          | YGR133W                 | PEX4          |
| YJL124C                                          | LSM1          | YPR119W                 | CLB2          |
| YHR039C-A                                        | VMA10         | YGL148W                 | ARO2          |
| YNL206C                                          | RTT106        | YNL229C                 | URE2          |
| YAR014C                                          | BUD14         | YNL225C                 | CNM67         |
| YLR371W                                          | ROM2          | YMR152W                 | YIM1          |
| YNL069C                                          | RPL16B        | YDR202C                 | RAV2          |
| YBL106C                                          | SRO77         | YNL090W                 | RHO2          |
| YBL008W                                          | HIR1          | YNL206C                 | RTT106        |
| YDR382W                                          | RPP2B         | YNL145W                 | MFA2          |
| YLR320W                                          | MMS22         | YBL101C                 | ECM21         |
| YGL147C                                          | RPL9A         | YLR371W                 | ROM2          |
| YNL206C                                          | RTT106        | YML102W                 | CAC2          |
| YLR360W                                          | VPS38         | YDL226C                 | GCS1          |

| Predictions at threshold level 0.75 continued... |               |                         |               |
|--------------------------------------------------|---------------|-------------------------|---------------|
| Gene1 of predicted pair                          |               | Gene2 of predicted pair |               |
| Systematic Name                                  | Standard Name | Systematic Name         | Standard Name |
| YKL126W                                          | YPK1          | YDR261C                 | EXG2          |
| YKL139W                                          | CTK1          | YBL101C                 | ECM21         |
| YMR199W                                          | CLN1          | YHR200W                 | RPN10         |
| YPL129W                                          | TAF14         | YOR189W                 | IES4          |
| YLR410W                                          | VIP1          | YMR038C                 | CCS1          |
| YPL115C                                          | BEM3          | YPR046W                 | MCM16         |
| YLR093C                                          | NYV1          | YDL077C                 | VAM6          |
| YEL053C                                          | MAK10         | YGL054C                 | ERV14         |
| YPL024W                                          | RMI1          | YLR192C                 | HCR1          |
| YDR254W                                          | CHL4          | YJL006C                 | CTK2          |
| YOR375C                                          | GDH1          | YJL095W                 | BCK1          |
| YGR249W                                          | MGA1          | YDR358W                 | GGA1          |
| YLR102C                                          | APC9          | YGL003C                 | CDH1          |
| YOR069W                                          | VPS5          | YKL119C                 | VPH2          |
| YDL127W                                          | PCL2          | YGR233C                 | PHO81         |
| YLR441C                                          | RPS1A         | YPL057C                 | SUR1          |
| YDR335W                                          | MSN5          | YJL157C                 | FAR1          |
| YLR192C                                          | HCR1          | YJL172W                 | CPS1          |
| YLR079W                                          | SIC1          | YMR198W                 | CIK1          |
| YGL135W                                          | RPL1B         | YBR082C                 | UBC4          |
| YKR099W                                          | BAS1          | YOR043W                 | WHI2          |
| YPL137C                                          | GIP3          | YBR036C                 | CSG2          |
| YMR224C                                          | MRE11         | YLR394W                 | CST9          |
| YDR378C                                          | LSM6          | YOR320C                 | GNT1          |
| YBR274W                                          | CHK1          | YBR215W                 | HPC2          |
| YJR099W                                          | YUH1          | YOR124C                 | UBP2          |
| YFL023W                                          | BUD27         | YKL126W                 | YPK1          |
| YLR083C                                          | EMP70         | YGL054C                 | ERV14         |
| YLR064W                                          | YLR064W       | YLR144C                 | ACF2          |



| Predictions at threshold level 0.75 continued... |               |                         |               |
|--------------------------------------------------|---------------|-------------------------|---------------|
| Gene1 of predicted pair                          |               | Gene2 of predicted pair |               |
| Systematic Name                                  | Standard Name | Systematic Name         | Standard Name |
| YDL006W                                          | PTC1          | YAL002W                 | VPS8          |
| YFR031C-A                                        | RPL2A         | YER040W                 | GLN3          |
| YNL106C                                          | INP52         | YFR036W                 | CDC26         |
| YNL201C                                          | PSY2          | YOR141C                 | ARP8          |
| YPL022W                                          | RAD1          | YJR060W                 | CBF1          |
| YNR052C                                          | POP2          | YJR035W                 | RAD26         |
| YLL007C                                          | YLL007C       | YAL002W                 | VPS8          |
| YGL033W                                          | HOP2          | YNL325C                 | FIG4          |
| YDL020C                                          | RPN4          | YGL175C                 | SAE2          |
| YBR107C                                          | IML3          | YGR188C                 | BUB1          |
| YGR104C                                          | SRB5          | YCR077C                 | PAT1          |
| YBR171W                                          | SEC66         | YGL151W                 | NUT1          |
| YLR320W                                          | MMS22         | YDR310C                 | SUM1          |
| YMR004W                                          | MVP1          | YNL044W                 | YIP3          |
| YKR048C                                          | NAP1          | YOR327C                 | SNC2          |
| YBR171W                                          | SEC66         | YGR252W                 | GCN5          |
| YPR018W                                          | RLF2          | YDR207C                 | UME6          |
| YLR292C                                          | SEC72         | YBR107C                 | IML3          |
| YCR081W                                          | SRB8          | YBR260C                 | RGD1          |
| YHR200W                                          | RPN10         | YLR370C                 | ARC18         |
| YDR443C                                          | SSN2          | YGR249W                 | MGA1          |
| YGL054C                                          | ERV14         | YPL120W                 | VPS30         |
| YHR111W                                          | UBA4          | YJR060W                 | CBF1          |
| YKL126W                                          | YPK1          | YDL223C                 | HBT1          |
| YHR152W                                          | SPO12         | YJL095W                 | BCK1          |
| YLR337C                                          | VRP1          | YMR127C                 | SAS2          |
| YLR288C                                          | MEC3          | YPR120C                 | CLB5          |
| YOR308C                                          | SNU66         | YOR124C                 | UBP2          |
| YIL053W                                          | RHR2          | YER122C                 | GLO3          |

| Predictions at threshold level 0.75 continued... |               |                         |               |
|--------------------------------------------------|---------------|-------------------------|---------------|
| Gene1 of predicted pair                          |               | Gene2 of predicted pair |               |
| Systematic Name                                  | Standard Name | Systematic Name         | Standard Name |
| YDR108W                                          | GSG1          | YCL001W                 | RER1          |
| YIL053W                                          | RHR2          | YJR032W                 | CPR7          |
| YBR216C                                          | YBP1          | YML007W                 | YAP1          |
| YMR017W                                          | SPO20         | YNR049C                 | MSO1          |
| YOR290C                                          | SNF2          | YHR108W                 | GGA2          |
| YDR320C                                          | SWA2          | YDR137W                 | RGP1          |
| YGL223C                                          | COG1          | YNL041C                 | COG6          |
| YMR095C                                          | SNO1          | YLR180W                 | SAM1          |
| YOR195W                                          | SLK19         | YKL114C                 | APN1          |
| YLR018C                                          | POM34         | YDL059C                 | RAD59         |
| YKL116C                                          | PRR1          | YER040W                 | GLN3          |
| YOR106W                                          | VAM3          | YLR309C                 | IMH1          |
| YFR010W                                          | UBP6          | YIL076W                 | SEC28         |
| YLR399C                                          | BDF1          | YPR072W                 | NOT5          |
| YMR199W                                          | CLN1          | YKR048C                 | NAP1          |
| YKR061W                                          | KTR2          | YIR005W                 | IST3          |
| YNR072W                                          | HXT17         | YBR019C                 | GAL10         |
| YNL307C                                          | MCK1          | YGR188C                 | BUB1          |
| YDR080W                                          | VPS41         | YCL001W                 | RER1          |
| YHR098C                                          | SFB3          | YGR229C                 | SMI1          |
| YOR076C                                          | SKI7          | YJR140C                 | HIR3          |
| YDR443C                                          | SSN2          | YER122C                 | GLO3          |
| YDR289C                                          | RTT103        | YHR114W                 | BZZ1          |
| YKL006W                                          | RPL14A        | YKL041W                 | VPS24         |
| YPR051W                                          | MAK3          | YDR318W                 | MCM21         |
| YJR056C                                          | YJR056C       | YOR066W                 | MSA1          |
| YFR040W                                          | SAP155        | YJL095W                 | BCK1          |
| YPL115C                                          | BEM3          | YMR273C                 | ZDS1          |
| YNL297C                                          | MON2          | YLR032W                 | RAD5          |

| Predictions at threshold level 0.75 continued... |               |                         |               |
|--------------------------------------------------|---------------|-------------------------|---------------|
| Gene1 of predicted pair                          |               | Gene2 of predicted pair |               |
| Systematic Name                                  | Standard Name | Systematic Name         | Standard Name |
| YLR090W                                          | XDJ1          | YDR477W                 | SNF1          |
| YJR135C                                          | MCM22         | YJL190C                 | RPS22A        |
| YHL031C                                          | GOS1          | YER162C                 | RAD4          |
| YGL212W                                          | VAM7          | YLR309C                 | IMH1          |
| YGL087C                                          | MMS2          | YEL056W                 | HAT2          |
| YCR020C-A                                        | MAK31         | YCR066W                 | RAD18         |
| YDL184C                                          | RPL41A        | YOR290C                 | SNF2          |
| YNL307C                                          | MCK1          | YPL018W                 | CTF19         |
| YOR076C                                          | SKI7          | YHR167W                 | THP2          |
| YPL137C                                          | GIP3          | YMR230W                 | RPS10B        |
| YOR127W                                          | RGA1          | YBL021C                 | HAP3          |
| YBR108W                                          | YBR108W       | YKR099W                 | BAS1          |
| YDR310C                                          | SUM1          | YMR230W                 | RPS10B        |
| YBL078C                                          | ATG8          | YHL031C                 | GOS1          |
| YKR020W                                          | VPS51         | YJL004C                 | SYS1          |
| YLR337C                                          | VRP1          | YFR036W                 | CDC26         |
| YPR066W                                          | UBA3          | YDR139C                 | RUB1          |
| YHL031C                                          | GOS1          | YJL036W                 | SNX4          |
| YPR131C                                          | NAT3          | YHR010W                 | RPL27A        |
| YMR054W                                          | STV1          | YNL051W                 | COG5          |
| YGL200C                                          | EMP24         | YKR014C                 | YPT52         |
| YEL013W                                          | VAC8          | YAL002W                 | VPS8          |
| YOR035C                                          | SHE4          | YJL183W                 | MNN11         |
| YOR069W                                          | VPS5          | YJR040W                 | GEF1          |
| YNL325C                                          | FIG4          | YBR280C                 | SAF1          |
| YMR199W                                          | CLN1          | YGL190C                 | CDC55         |
| YER116C                                          | SLX8          | YMR153W                 | NUP53         |
| YPL249C-A                                        | RPL36B        | YCR009C                 | RVS161        |
| YBL008W                                          | HIR1          | YNL236W                 | SIN4          |

| Predictions at threshold level 0.75 continued... |               |                         |               |
|--------------------------------------------------|---------------|-------------------------|---------------|
| Gene1 of predicted pair                          |               | Gene2 of predicted pair |               |
| Systematic Name                                  | Standard Name | Systematic Name         | Standard Name |
| YBR126C                                          | TPS1          | YLR320W                 | MMS22         |
| YOR043W                                          | WHI2          | YMR152W                 | YIM1          |
| YDR320C                                          | SWA2          | YNR006W                 | VPS27         |
| YDL185W                                          | TFP1          | YNL107W                 | YAF9          |
| YMR026C                                          | PEX12         | YDR142C                 | PEX7          |
| YPL037C                                          | EGD1          | YFL033C                 | RIM15         |
| YPR046W                                          | MCM16         | YJR035W                 | RAD26         |
| YML058W                                          | SML1          | YGL094C                 | PAN2          |
| YNL215W                                          | IES2          | YGR270W                 | YTA7          |
| YPL253C                                          | VIK1          | YDR155C                 | CPR1          |
| YDR358W                                          | GGA1          | YLR398C                 | SKI2          |
| YLR320W                                          | MMS22         | YGR188C                 | BUB1          |
| YCR065W                                          | HCM1          | YJL006C                 | CTK2          |
| YNL253W                                          | TEX1          | YBR020W                 | GAL1          |
| YBR171W                                          | SEC66         | YDL083C                 | RPS16B        |
| YPL022W                                          | RAD1          | YOR368W                 | RAD17         |
| YKL116C                                          | PRR1          | YBR171W                 | SEC66         |
| YMR172W                                          | HOT1          | YGR054W                 | YGR054W       |
| YPL096C-A                                        | ERI1          | YER111C                 | SWI4          |
| YKL139W                                          | CTK1          | YKL110C                 | KTI12         |
| YNL087W                                          | TCB2          | YFR036W                 | CDC26         |
| YDR004W                                          | RAD57         | YPL178W                 | CBC2          |
| YDL184C                                          | RPL41A        | YDL083C                 | RPS16B        |
| YPL022W                                          | RAD1          | YGL163C                 | RAD54         |
| YHR178W                                          | STB5          | YAL002W                 | VPS8          |
| YOR127W                                          | RGA1          | YJR135C                 | MCM22         |
| YOL051W                                          | GAL11         | YER068W                 | MOT2          |
| YPL001W                                          | HAT1          | YCR077C                 | PAT1          |
| YOR290C                                          | SNF2          | YLR371W                 | ROM2          |

| Predictions at threshold level 0.75 continued... |               |                         |               |
|--------------------------------------------------|---------------|-------------------------|---------------|
| Gene1 of predicted pair                          |               | Gene2 of predicted pair |               |
| Systematic Name                                  | Standard Name | Systematic Name         | Standard Name |
| YOR076C                                          | SKI7          | YHR077C                 | NMD2          |
| YAL024C                                          | LTE1          | YNL076W                 | MKS1          |
| YOR039W                                          | CKB2          | YNL079C                 | TPM1          |
| YJL036W                                          | SNX4          | YKR030W                 | GMH1          |
| YNL248C                                          | RPA49         | YPR120C                 | CLB5          |
| YMR224C                                          | MRE11         | YDL083C                 | RPS16B        |
| YNL106C                                          | INP52         | YLR079W                 | SIC1          |
| YHR178W                                          | STB5          | YBL021C                 | HAP3          |
| YDL083C                                          | RPS16B        | YGL124C                 | MON1          |
| YFR036W                                          | CDC26         | YOL054W                 | PSH1          |
| YDL082W                                          | RPL13A        | YGL246C                 | RAI1          |
| YDR004W                                          | RAD57         | YKL101W                 | HSL1          |
| YDR378C                                          | LSM6          | YNL079C                 | TPM1          |
| YBL071W-A                                        | KTI11         | YKL191W                 | DPH2          |
| YML071C                                          | COG8          | YPL120W                 | VPS30         |
| YML016C                                          | PPZ1          | YKL101W                 | HSL1          |
| YLR094C                                          | GIS3          | YOL081W                 | IRA2          |
| YDL116W                                          | NUP84         | YDL059C                 | RAD59         |
| YBL047C                                          | EDE1          | YHL002W                 | HSE1          |
| YJL036W                                          | SNX4          | YDL077C                 | VAM6          |
| YDR254W                                          | CHL4          | YNL236W                 | SIN4          |
| YGL078C                                          | DBP3          | YIL076W                 | SEC28         |
| YNL058C                                          | YNL058C       | YER122C                 | GLO3          |
| YOR243C                                          | PUS7          | YCL037C                 | SRO9          |
| YML095C                                          | RAD10         | YML102W                 | CAC2          |
| YJL138C                                          | TIF2          | YGL019W                 | CKB1          |
| YDR137W                                          | RGP1          | YFR036W                 | CDC26         |
| YNL090W                                          | RHO2          | YDL240W                 | LRG1          |
| YER115C                                          | SPR6          | YMR199W                 | CLN1          |

| Predictions at threshold level 0.75 continued... |               |                         |               |
|--------------------------------------------------|---------------|-------------------------|---------------|
| Gene1 of predicted pair                          |               | Gene2 of predicted pair |               |
| Systematic Name                                  | Standard Name | Systematic Name         | Standard Name |
| YLR337C                                          | VRP1          | YPL096C-A               | ERI1          |
| YOR035C                                          | SHE4          | YLR180W                 | SAM1          |
| YIL156W                                          | UBP7          | YOL126C                 | MDH2          |
| YKL048C                                          | ELM1          | YDL077C                 | VAM6          |
| YLR079W                                          | SIC1          | YKL213C                 | DOA1          |
| YLR309C                                          | IMH1          | YAR014C                 | BUD14         |
| YER144C                                          | UBP5          | YEL060C                 | PRB1          |
| YAL051W                                          | OAF1          | YEL056W                 | HAT2          |
| YKR057W                                          | RPS21A        | YKL048C                 | ELM1          |
| YKL048C                                          | ELM1          | YLR370C                 | ARC18         |
| YLR234W                                          | TOP3          | YNL297C                 | MON2          |
| YDL116W                                          | NUP84         | YDL013W                 | SLX5          |
| YER118C                                          | SHO1          | YJL183W                 | MNN11         |
| YDR383C                                          | NKP1          | YOL054W                 | PSH1          |
| YOR109W                                          | INP53         | YCR066W                 | RAD18         |
| YDR137W                                          | RGP1          | YJR084W                 | CSN12         |
| YNL044W                                          | YIP3          | YKR020W                 | VPS51         |
| YNL325C                                          | FIG4          | YBR036C                 | CSG2          |
| YGR108W                                          | CLB1          | YBL051C                 | PIN4          |
| YPR051W                                          | MAK3          | YKR020W                 | VPS51         |
| YLR095C                                          | IOC2          | YMR311C                 | GLC8          |
| YNL032W                                          | SIW14         | YLR370C                 | ARC18         |
| YKR048C                                          | NAP1          | YGL031C                 | RPL24A        |
| YBR108W                                          | YBR108W       | YJL183W                 | MNN11         |
| YJR032W                                          | CPR7          | YHR081W                 | LRP1          |
| YGR200C                                          | ELP2          | YBL071W-A               | KTI11         |
| YNL215W                                          | IES2          | YER161C                 | SPT2          |
| YNL291C                                          | MID1          | YJR135C                 | MCM22         |
| YKL116C                                          | PRR1          | YNL058C                 | YNL058C       |

| Predictions at threshold level 0.75 continued... |               |                         |               |
|--------------------------------------------------|---------------|-------------------------|---------------|
| Gene1 of predicted pair                          |               | Gene2 of predicted pair |               |
| Systematic Name                                  | Standard Name | Systematic Name         | Standard Name |
| YDR477W                                          | SNF1          | YDR358W                 | GGA1          |
| YOR337W                                          | TEA1          | YPL161C                 | BEM4          |
| YPL253C                                          | VIK1          | YNL107W                 | YAF9          |
| YEL065W                                          | SIT1          | YHR060W                 | VMA22         |
| YCR097W                                          | HMRA1         | YCR039C                 | MATALPHA2     |
| YMR095C                                          | SNO1          | YOL081W                 | IRA2          |
| YLR119W                                          | SRN2          | YBR217W                 | ATG12         |
| YIL076W                                          | SEC28         | YKR099W                 | BAS1          |
| YMR152W                                          | YIM1          | YER139C                 | YER139C       |
| YPL001W                                          | HAT1          | YBR274W                 | CHK1          |
| YPR120C                                          | CLB5          | YOL091W                 | SPO21         |
| YNL106C                                          | INP52         | YML016C                 | PPZ1          |
| YGL153W                                          | PEX14         | YJL095W                 | BCK1          |
| YML117W                                          | NAB6          | YMR038C                 | CCS1          |
| YPL115C                                          | BEM3          | YCR086W                 | CSM1          |
| YOR066W                                          | MSA1          | YBR019C                 | GAL10         |
| YCL001W                                          | RER1          | YNL238W                 | KEX2          |
| YOR197W                                          | MCA1          | YBL106C                 | SRO77         |
| YIL076W                                          | SEC28         | YEL053C                 | MAK10         |
| YLR360W                                          | VPS38         | YMR199W                 | CLN1          |
| YDR363W-A                                        | SEM1          | YGR252W                 | GCN5          |
| YPR017C                                          | DSS4          | YER122C                 | GLO3          |
| YDR443C                                          | SSN2          | YGL115W                 | SNF4          |
| YLR360W                                          | VPS38         | YER162C                 | RAD4          |
| YMR199W                                          | CLN1          | YEL036C                 | ANP1          |
| YGL147C                                          | RPL9A         | YER122C                 | GLO3          |
| YNL068C                                          | FKH2          | YNL229C                 | URE2          |
| YLR135W                                          | SLX4          | YCR086W                 | CSM1          |
| YDR245W                                          | MNN10         | YPL213W                 | LEA1          |

| Predictions at threshold level 0.75 continued... |               |                         |               |
|--------------------------------------------------|---------------|-------------------------|---------------|
| Gene1 of predicted pair                          |               | Gene2 of predicted pair |               |
| Systematic Name                                  | Standard Name | Systematic Name         | Standard Name |
| YGL133W                                          | ITC1          | YIL008W                 | URM1          |
| YER068W                                          | MOT2          | YGR134W                 | CAF130        |
| YER110C                                          | KAP123        | YBR171W                 | SEC66         |
| YGL212W                                          | VAM7          | YDR080W                 | VPS41         |
| YMR055C                                          | BUB2          | YPR046W                 | MCM16         |
| YNL325C                                          | FIG4          | YNL307C                 | MCK1          |
| YNL297C                                          | MON2          | YGR105W                 | VMA21         |
| YBR200W                                          | BEM1          | YDR200C                 | VPS64         |
| YMR224C                                          | MRE11         | YHR115C                 | DMA1          |
| YGR020C                                          | VMA7          | YOL018C                 | TLG2          |
| YKL032C                                          | IXR1          | YDL155W                 | CLB3          |
| YGL078C                                          | DBP3          | YDL077C                 | VAM6          |
| YDR146C                                          | SWI5          | YDR207C                 | UME6          |
| YNL107W                                          | YAF9          | YLR182W                 | SWI6          |
| YOR270C                                          | VPH1          | YMR152W                 | YIM1          |
| YOL121C                                          | RPS19A        | YMR311C                 | GLC8          |
| YPL042C                                          | SSN3          | YOR080W                 | DIA2          |
| YMR164C                                          | MSS11         | YKL068W                 | NUP100        |
| YMR231W                                          | PEP5          | YLR093C                 | NYV1          |
| YOR127W                                          | RGA1          | YJL183W                 | MNN11         |
| YHR012W                                          | VPS29         | YJL095W                 | BCK1          |
| YBL072C                                          | RPS8A         | YOL081W                 | IRA2          |
| YER144C                                          | UBP5          | YJR084W                 | CSN12         |
| YDR103W                                          | STE5          | YCL032W                 | STE50         |
| YLR386W                                          | VAC14         | YBR200W                 | BEM1          |
| YFL048C                                          | EMP47         | YEL036C                 | ANP1          |
| YLR234W                                          | TOP3          | YNL016W                 | PUB1          |
| YBL103C                                          | RTG3          | YOL067C                 | RTG1          |
| YJL078C                                          | PRY3          | YFL044C                 | OTU1          |



| Predictions at threshold level 0.75 continued... |               |                         |               |
|--------------------------------------------------|---------------|-------------------------|---------------|
| Gene1 of predicted pair                          |               | Gene2 of predicted pair |               |
| Systematic Name                                  | Standard Name | Systematic Name         | Standard Name |
| YKR072C                                          | SIS2          | YPL001W                 | HAT1          |
| YMR199W                                          | CLN1          | YMR311C                 | GLC8          |
| YOR001W                                          | RRP6          | YLR182W                 | SWI6          |
| YIL159W                                          | BNR1          | YPL037C                 | EGD1          |
| YBR108W                                          | YBR108W       | YER139C                 | YER139C       |
| YHR161C                                          | YAP1801       | YAL030W                 | SNC1          |
| YLR234W                                          | TOP3          | YMR038C                 | CCS1          |
| YJL036W                                          | SNX4          | YPR049C                 | ATG11         |
| YKL139W                                          | CTK1          | YNL325C                 | FIG4          |
| YOR275C                                          | RIM20         | YKR048C                 | NAP1          |
| YPL253C                                          | VIK1          | YOL067C                 | RTG1          |
| YDL116W                                          | NUP84         | YMR198W                 | CIK1          |
| YMR224C                                          | MRE11         | YLR441C                 | RPS1A         |
| YER044C                                          | ERG28         | YML071C                 | COG8          |
| YLR079W                                          | SIC1          | YJR063W                 | RPA12         |
| YAL014C                                          | SYN8          | YOR036W                 | PEP12         |
| YNL106C                                          | INP52         | YPL018W                 | CTF19         |
| YMR224C                                          | MRE11         | YMR055C                 | BUB2          |
| YPL253C                                          | VIK1          | YHR111W                 | UBA4          |
| YBL008W                                          | HIR1          | YGL003C                 | CDH1          |
| YDL006W                                          | PTC1          | YBR082C                 | UBC4          |
| YLR006C                                          | SSK1          | YGL038C                 | OCH1          |
| YPR072W                                          | NOT5          | YOR064C                 | YNG1          |
| YFR036W                                          | CDC26         | YLR398C                 | SKI2          |
| YLR360W                                          | VPS38         | YOR035C                 | SHE4          |
| YHR178W                                          | STB5          | YMR055C                 | BUB2          |
| YHR013C                                          | ARD1          | YBL025W                 | RRN10         |
| YDR071C                                          | PAA1          | YKL114C                 | APN1          |
| YMR224C                                          | MRE11         | YHR111W                 | UBA4          |

| Predictions at threshold level 0.75 continued... |               |                         |               |
|--------------------------------------------------|---------------|-------------------------|---------------|
| Gene1 of predicted pair                          |               | Gene2 of predicted pair |               |
| Systematic Name                                  | Standard Name | Systematic Name         | Standard Name |
| YIL036W                                          | CST6          | YGR270W                 | YTA7          |
| YKL048C                                          | ELM1          | YJL117W                 | PHO86         |
| YCL037C                                          | SRO9          | YKR020W                 | VPS51         |
| YBR108W                                          | YBR108W       | YHL002W                 | HSE1          |
| YHR084W                                          | STE12         | YHR052W                 | CIC1          |
| YML112W                                          | CTK3          | YOL054W                 | PSH1          |
| YPR072W                                          | NOT5          | YGR134W                 | CAF130        |
| YBL051C                                          | PIN4          | YOL067C                 | RTG1          |
| YGR104C                                          | SRB5          | YBR289W                 | SNF5          |
| YPR084W                                          | YPR084W       | YOR069W                 | VPS5          |
| YOR035C                                          | SHE4          | YMR089C                 | YTA12         |
| YDR363W-A                                        | SEM1          | YNL116W                 | DMA2          |
| YKL007W                                          | CAP1          | YCR088W                 | ABP1          |
| YOR112W                                          | CEX1          | YPL105C                 | YPL105C       |
| YDR225W                                          | HTA1          | YDR227W                 | SIR4          |
| YFR031C-A                                        | RPL2A         | YDR080W                 | VPS41         |
| YOR144C                                          | ELG1          | YHR056C                 | RSC30         |
| YBR065C                                          | ECM2          | YBR188C                 | NTC20         |
| YPL115C                                          | BEM3          | YLR381W                 | CTF3          |
| YBR194W                                          | SOY1          | YMR202W                 | ERG2          |
| YNL054W                                          | VAC7          | YOL081W                 | IRA2          |
| YDL101C                                          | DUN1          | YER116C                 | SLX8          |
| YOR066W                                          | MSA1          | YJR084W                 | CSN12         |
| YGR105W                                          | VMA21         | YDL192W                 | ARF1          |
| YLR182W                                          | SWI6          | YOL081W                 | IRA2          |
| YLR357W                                          | RSC2          | YNL107W                 | YAF9          |
| YDL065C                                          | PEX19         | YAL055W                 | PEX22         |
| YKL007W                                          | CAP1          | YLR006C                 | SSK1          |
| YHR111W                                          | UBA4          | YJR063W                 | RPA12         |

| Predictions at threshold level 0.75 continued... |               |                         |               |
|--------------------------------------------------|---------------|-------------------------|---------------|
| Gene1 of predicted pair                          |               | Gene2 of predicted pair |               |
| Systematic Name                                  | Standard Name | Systematic Name         | Standard Name |
| YOR043W                                          | WHI2          | YLR094C                 | GIS3          |
| YLR447C                                          | VMA6          | YEL051W                 | VMA8          |
| YIL159W                                          | BNR1          | YOR043W                 | WHI2          |
| YMR095C                                          | SNO1          | YNL333W                 | SNZ2          |
| YHL027W                                          | RIM101        | YMR032W                 | HOF1          |
| YOR106W                                          | VAM3          | YAL002W                 | VPS8          |
| YJL006C                                          | CTK2          | YJR035W                 | RAD26         |
| YNL297C                                          | MON2          | YKL119C                 | VPH2          |
| YMR133W                                          | REC114        | YJL095W                 | BCK1          |
| YOR375C                                          | GDH1          | YOR141C                 | ARP8          |
| YAL024C                                          | LTE1          | YOR066W                 | MSA1          |
| YDR440W                                          | DOT1          | YHR167W                 | THP2          |
| YOL018C                                          | TLG2          | YNL107W                 | YAF9          |
| YPL253C                                          | VIK1          | YLR032W                 | RAD5          |
| YKR095W                                          | MLP1          | YJR090C                 | GRR1          |
| YDL059C                                          | RAD59         | YMR231W                 | PEP5          |
| YKR059W                                          | TIF1          | YOL081W                 | IRA2          |
| YNL032W                                          | SIW14         | YBR200W                 | BEM1          |
| YOL062C                                          | APM4          | YJR005W                 | APL1          |
| YBL051C                                          | PIN4          | YDR507C                 | GIN4          |
| YCR034W                                          | FEN1          | YGL019W                 | CKB1          |
| YGR072W                                          | UPF3          | YEL051W                 | VMA8          |
| YIL159W                                          | BNR1          | YDR261C                 | EXG2          |
| YOR290C                                          | SNF2          | YGL025C                 | PGD1          |
| YOR043W                                          | WHI2          | YMR133W                 | REC114        |
| YLR325C                                          | RPL38         | YIL133C                 | RPL16A        |
| YLR234W                                          | TOP3          | YML062C                 | MFT1          |
| YPR131C                                          | NAT3          | YFL023W                 | BUD27         |
| YGR241C                                          | YAP1802       | YJR035W                 | RAD26         |

| Predictions at threshold level 0.75 continued... |               |                         |               |
|--------------------------------------------------|---------------|-------------------------|---------------|
| Gene1 of predicted pair                          |               | Gene2 of predicted pair |               |
| Systematic Name                                  | Standard Name | Systematic Name         | Standard Name |
| YJL154C                                          | VPS35         | YJL004C                 | SYS1          |
| YMR142C                                          | RPL13B        | YMR311C                 | GLC8          |
| YBR173C                                          | UMP1          | YPL161C                 | BEM4          |
| YPL161C                                          | BEM4          | YKL101W                 | HSL1          |
| YDL116W                                          | NUP84         | YJL127C                 | SPT10         |
| YLR095C                                          | IOC2          | YPL024W                 | RMI1          |
| YDR004W                                          | RAD57         | YDL013W                 | SLX5          |
| YFR036W                                          | CDC26         | YLR093C                 | NYV1          |
| YLR452C                                          | SST2          | YOR327C                 | SNC2          |
| YER110C                                          | KAP123        | YAL002W                 | VPS8          |
| YMR016C                                          | SOK2          | YJR032W                 | CPR7          |
| YMR004W                                          | MVP1          | YFL033C                 | RIM15         |
| YDR318W                                          | MCM21         | YGL124C                 | MON1          |
| YEL051W                                          | VMA8          | YPL120W                 | VPS30         |
| YMR109W                                          | MYO5          | YGR192C                 | TDH3          |
| YER087C-B                                        | SBH1          | YGL244W                 | RTF1          |
| YEL050C                                          | RML2          | YGL115W                 | SNF4          |
| YBR173C                                          | UMP1          | YBR108W                 | YBR108W       |
| YLR399C                                          | BDF1          | YGR270W                 | YTA7          |
| YJR090C                                          | GRR1          | YDR139C                 | RUB1          |
| YNL291C                                          | MID1          | YHR060W                 | VMA22         |
| YNL325C                                          | FIG4          | YHR039C-A               | VMA10         |
| YDR293C                                          | SSD1          | YKR030W                 | GMH1          |
| YOR327C                                          | SNC2          | YNL076W                 | MKS1          |
| YDR004W                                          | RAD57         | YOR038C                 | HIR2          |
| YMR029C                                          | FAR8          | YMR052W                 | FAR3          |
| YDR245W                                          | MNN10         | YHL011C                 | PRS3          |
| YDR225W                                          | HTA1          | YOL148C                 | SPT20         |
| YNL041C                                          | COG6          | YPR032W                 | SRO7          |

| Predictions at threshold level 0.75 continued... |               |                         |               |
|--------------------------------------------------|---------------|-------------------------|---------------|
| Gene1 of predicted pair                          |               | Gene2 of predicted pair |               |
| Systematic Name                                  | Standard Name | Systematic Name         | Standard Name |
| YGL163C                                          | RAD54         | YFR030W                 | MET10         |
| YIR003W                                          | YIR003W       | YNL020C                 | ARK1          |
| YLR119W                                          | SRN2          | YBR280C                 | SAF1          |
| YDR108W                                          | GSG1          | YMR004W                 | MVP1          |
| YOR195W                                          | SLK19         | YDR378C                 | LSM6          |
| YKL048C                                          | ELM1          | YDL047W                 | SIT4          |
| YOR001W                                          | RRP6          | YNL236W                 | SIN4          |
| YGR019W                                          | UGA1          | YPL253C                 | VIK1          |
| YBR200W                                          | BEM1          | YNL041C                 | COG6          |
| YBR108W                                          | YBR108W       | YKL048C                 | ELM1          |
| YDR174W                                          | HMO1          | YDR439W                 | LRS4          |
| YCL037C                                          | SRO9          | YJR060W                 | CBF1          |
| YPL137C                                          | GIP3          | YLR370C                 | ARC18         |
| YCL037C                                          | SRO9          | YDR378C                 | LSM6          |
| YGL212W                                          | VAM7          | YJR032W                 | CPR7          |
| YNL236W                                          | SIN4          | YGL151W                 | NUT1          |
| YLR181C                                          | VTA1          | YKL002W                 | DID4          |
| YMR026C                                          | PEX12         | YLR320W                 | MMS22         |
| YIL159W                                          | BNR1          | YJR032W                 | CPR7          |
| YDR225W                                          | HTA1          | YOR008C                 | SLG1          |
| YGL200C                                          | EMP24         | YLR370C                 | ARC18         |
| YEL053C                                          | MAK10         | YJL190C                 | RPS22A        |
| YMR055C                                          | BUB2          | YDR289C                 | RTT103        |
| YNL297C                                          | MON2          | YNL041C                 | COG6          |
| YGL033W                                          | HOP2          | YDR477W                 | SNF1          |
| YCR020C-A                                        | MAK31         | YAR014C                 | BUD14         |
| YJR099W                                          | YUH1          | YLR128W                 | DCN1          |
| YHR039C-A                                        | VMA10         | YGL163C                 | RAD54         |
| YDR156W                                          | RPA14         | YMR038C                 | CCS1          |

| Predictions at threshold level 0.75 continued... |               |                         |               |
|--------------------------------------------------|---------------|-------------------------|---------------|
| Gene1 of predicted pair                          |               | Gene2 of predicted pair |               |
| Systematic Name                                  | Standard Name | Systematic Name         | Standard Name |
| YNR072W                                          | HXT17         | YMR214W                 | SCJ1          |
| YIL034C                                          | CAP2          | YHR012W                 | VPS29         |
| YML103C                                          | NUP188        | YLR079W                 | SIC1          |
| YER162C                                          | RAD4          | YLR398C                 | SKI2          |
| YOR337W                                          | TEA1          | YNL238W                 | KEX2          |
| YER116C                                          | SLX8          | YMR230W                 | RPS10B        |
| YMR142C                                          | RPL13B        | YPL057C                 | SUR1          |
| YDR225W                                          | HTA1          | YDR176W                 | NGG1          |
| YJR024C                                          | MDE1          | YPL256C                 | CLN2          |
| YMR026C                                          | PEX12         | YOL081W                 | IRA2          |
| YPR171W                                          | BSP1          | YHL002W                 | HSE1          |
| YER096W                                          | SHC1          | YBR260C                 | RGD1          |
| YCR034W                                          | FEN1          | YLR435W                 | TSR2          |
| YDR137W                                          | RGP1          | YCR053W                 | THR4          |
| YHR119W                                          | SET1          | YDR469W                 | SDC1          |
| YKR001C                                          | VPS1          | YOR035C                 | SHE4          |
| YGL237C                                          | HAP2          | YKL109W                 | HAP4          |
| YGL163C                                          | RAD54         | YAR014C                 | BUD14         |
| YKL126W                                          | YPK1          | YEL060C                 | PRB1          |
| YML112W                                          | CTK3          | YOL081W                 | IRA2          |
| YPL037C                                          | EGD1          | YHR081W                 | LRP1          |
| YIL053W                                          | RHR2          | YNL041C                 | COG6          |
| YJR140C                                          | HIR3          | YDR245W                 | MNN10         |
| YKL048C                                          | ELM1          | YDR264C                 | AKR1          |
| YMR127C                                          | SAS2          | YDL155W                 | CLB3          |
| YNL214W                                          | PEX17         | YAL055W                 | PEX22         |
| YDR174W                                          | HMO1          | YLR254C                 | NDL1          |
| YOR080W                                          | DIA2          | YDR137W                 | RGP1          |
| YER116C                                          | SLX8          | YLR094C                 | GIS3          |

| Predictions at threshold level 0.75 continued... |               |                         |               |
|--------------------------------------------------|---------------|-------------------------|---------------|
| Gene1 of predicted pair                          |               | Gene2 of predicted pair |               |
| Systematic Name                                  | Standard Name | Systematic Name         | Standard Name |
| YHR134W                                          | WSS1          | YPL018W                 | CTF19         |
| YEL053C                                          | MAK10         | YHR039C-A               | VMA10         |
| YOL067C                                          | RTG1          | YDR310C                 | SUM1          |
| YLR386W                                          | VAC14         | YNR072W                 | HXT17         |
| YKR099W                                          | BAS1          | YPR030W                 | CSR2          |
| YLR315W                                          | NKP2          | YOL054W                 | PSH1          |
| YOR039W                                          | CKB2          | YBR009C                 | HHF1          |
| YMR095C                                          | SNO1          | YKL116C                 | PRR1          |
| YHR200W                                          | RPN10         | YNL238W                 | KEX2          |
| YNR052C                                          | POP2          | YGR188C                 | BUB1          |
| YLR119W                                          | SRN2          | YER044C                 | ERG28         |
| YLR234W                                          | TOP3          | YLR350W                 | ORM2          |
| YLR357W                                          | RSC2          | YNL030W                 | HHF2          |
| YJR032W                                          | CPR7          | YOL121C                 | RPS19A        |
| YBR217W                                          | ATG12         | YDR484W                 | VPS52         |
| YBR042C                                          | CST26         | YGL200C                 | EMP24         |
| YJL095W                                          | BCK1          | YGL253W                 | HXK2          |
| YFR010W                                          | UBP6          | YHR039C-A               | VMA10         |
| YPL161C                                          | BEM4          | YDR155C                 | CPR1          |
| YPL234C                                          | TFP3          | YOL108C                 | INO4          |
| YKR061W                                          | KTR2          | YJR060W                 | CBF1          |
| YLR386W                                          | VAC14         | YGL252C                 | RTG2          |
| YNL127W                                          | FAR11         | YNL051W                 | COG5          |
| YBR217W                                          | ATG12         | YER139C                 | YER139C       |
| YHL011C                                          | PRS3          | YOL081W                 | IRA2          |
| YDL192W                                          | ARF1          | YMR311C                 | GLC8          |
| YLR288C                                          | MEC3          | YOR363C                 | PIP2          |
| YGL134W                                          | PCL10         | YPL240C                 | HSP82         |
| YGL060W                                          | YBP2          | YOR083W                 | WHI5          |

| Predictions at threshold level 0.75 continued... |               |                         |               |
|--------------------------------------------------|---------------|-------------------------|---------------|
| Gene1 of predicted pair                          |               | Gene2 of predicted pair |               |
| Systematic Name                                  | Standard Name | Systematic Name         | Standard Name |
| YLR090W                                          | XDJ1          | YJL183W                 | MNN11         |
| YDR153C                                          | ENT5          | YOL108C                 | INO4          |
| YOR035C                                          | SHE4          | YDL077C                 | VAM6          |
| YNL225C                                          | CNM67         | YOL081W                 | IRA2          |
| YPR084W                                          | YPR084W       | YCR020C-A               | MAK31         |
| YHR041C                                          | SRB2          | YNR023W                 | SNF12         |
| YJL060W                                          | BNA3          | YDR171W                 | HSP42         |
| YIL159W                                          | BNR1          | YDL077C                 | VAM6          |
| YDR080W                                          | VPS41         | YDR310C                 | SUM1          |
| YKL048C                                          | ELM1          | YJR032W                 | CPR7          |
| YFR010W                                          | UBP6          | YJR140C                 | HIR3          |
| YMR095C                                          | SNO1          | YPL137C                 | GIP3          |
| YNL032W                                          | SIW14         | YFR036W                 | CDC26         |
| YIL034C                                          | CAP2          | YJL095W                 | BCK1          |
| YOR109W                                          | INP53         | YNR006W                 | VPS27         |
| YDR137W                                          | RGP1          | YBR280C                 | SAF1          |
| YDR456W                                          | NHX1          | YJL095W                 | BCK1          |
| YMR294W                                          | JNM1          | YGL190C                 | CDC55         |
| YGR105W                                          | VMA21         | YKL119C                 | VPH2          |
| YHR178W                                          | STB5          | YDR254W                 | CHL4          |
| YDR004W                                          | RAD57         | YBL008W                 | HIR1          |
| YMR026C                                          | PEX12         | YNL041C                 | COG6          |
| YMR276W                                          | DSK2          | YJR099W                 | YUH1          |
| YMR142C                                          | RPL13B        | YPR030W                 | CSR2          |
| YHR012W                                          | VPS29         | YJL004C                 | SYS1          |
| YHR200W                                          | RPN10         | YMR230W                 | RPS10B        |
| YBR258C                                          | SHG1          | YPL057C                 | SUR1          |
| YDL155W                                          | CLB3          | YBL101C                 | ECM21         |
| YFR040W                                          | SAP155        | YER122C                 | GLO3          |



| Predictions at threshold level 0.75 continued... |               |                         |               |
|--------------------------------------------------|---------------|-------------------------|---------------|
| Gene1 of predicted pair                          |               | Gene2 of predicted pair |               |
| Systematic Name                                  | Standard Name | Systematic Name         | Standard Name |
| YMR216C                                          | SKY1          | YPR032W                 | SRO7          |
| YBR171W                                          | SEC66         | YPL161C                 | BEM4          |
| YEL009C                                          | GCN4          | YLR399C                 | BDF1          |
| YNL201C                                          | PSY2          | YOL081W                 | IRA2          |
| YPR018W                                          | RLF2          | YGR252W                 | GCN5          |
| YBR215W                                          | HPC2          | YBR036C                 | CSG2          |
| YNL291C                                          | MID1          | YML028W                 | TSA1          |
| YMR026C                                          | PEX12         | YER162C                 | RAD4          |
| YFR010W                                          | UBP6          | YER139C                 | YER139C       |
| YLR254C                                          | NDL1          | YLR182W                 | SWI6          |
| YPL234C                                          | TFP3          | YAR014C                 | BUD14         |
| YIL008W                                          | URM1          | YAR014C                 | BUD14         |
| YOR270C                                          | VPH1          | YOL081W                 | IRA2          |
| YHR060W                                          | VMA22         | YLR398C                 | SKI2          |
| YAL024C                                          | LTE1          | YGR135W                 | PRE9          |
| YOR275C                                          | RIM20         | YJL117W                 | PHO86         |
| YMR109W                                          | MYO5          | YDR254W                 | CHL4          |
| YIL008W                                          | URM1          | YDR183W                 | PLP1          |
| YLR381W                                          | CTF3          | YGL124C                 | MON1          |
| YMR224C                                          | MRE11         | YBR019C                 | GAL10         |
| YOR195W                                          | SLK19         | YDR076W                 | RAD55         |
| YDR379W                                          | RGA2          | YPL161C                 | BEM4          |
| YML016C                                          | PPZ1          | YOL081W                 | IRA2          |
| YNL307C                                          | MCK1          | YOL121C                 | RPS19A        |
| YIL036W                                          | CST6          | YPL152W                 | RRD2          |
| YGL033W                                          | HOP2          | YLR441C                 | RPS1A         |
| YGR133W                                          | PEX4          | YAL055W                 | PEX22         |
| YOR270C                                          | VPH1          | YLR371W                 | ROM2          |
| YPR046W                                          | MCM16         | YJR084W                 | CSN12         |

| Predictions at threshold level 0.75 continued... |               |                         |               |
|--------------------------------------------------|---------------|-------------------------|---------------|
| Gene1 of predicted pair                          |               | Gene2 of predicted pair |               |
| Systematic Name                                  | Standard Name | Systematic Name         | Standard Name |
| YJR135C                                          | MCM22         | YPR119W                 | CLB2          |
| YLR095C                                          | IOC2          | YOR043W                 | WHI2          |
| YKR001C                                          | VPS1          | YJR058C                 | APS2          |
| YOL121C                                          | RPS19A        | YJR084W                 | CSN12         |
| YDL020C                                          | RPN4          | YNL238W                 | KEX2          |
| YPL253C                                          | VIK1          | YGL003C                 | CDH1          |
| YJL176C                                          | SWI3          | YBL047C                 | EDE1          |
| YDL135C                                          | RDI1          | YDL240W                 | LRG1          |
| YHR119W                                          | SET1          | YLR288C                 | MEC3          |
| YDR202C                                          | RAV2          | YNL238W                 | KEX2          |
| YIL159W                                          | BNR1          | YNL307C                 | MCK1          |
| YAL024C                                          | LTE1          | YKR072C                 | SIS2          |
| YOR127W                                          | RGA1          | YDR155C                 | CPR1          |
| YJL124C                                          | LSM1          | YDR318W                 | MCM21         |
| YJR032W                                          | CPR7          | YGL151W                 | NUT1          |
| YLR234W                                          | TOP3          | YIL008W                 | URM1          |
| YHR206W                                          | SKN7          | YNL027W                 | CRZ1          |
| YFL023W                                          | BUD27         | YDL083C                 | RPS16B        |
| YNL106C                                          | INP52         | YMR055C                 | BUB2          |
| YER110C                                          | KAP123        | YJL190C                 | RPS22A        |
| YPL042C                                          | SSN3          | YBR107C                 | IML3          |
| YPL096C-A                                        | ERI1          | YHR030C                 | SLT2          |
| YHR039C-A                                        | VMA10         | YAR014C                 | BUD14         |
| YNL215W                                          | IES2          | YKL139W                 | CTK1          |
| YER001W                                          | MNN1          | YNL051W                 | COG5          |
| YMR224C                                          | MRE11         | YGL161C                 | YIP5          |
| YOR275C                                          | RIM20         | YHR012W                 | VPS29         |
| YGR135W                                          | PRE9          | YEL036C                 | ANP1          |
| YLR429W                                          | CRN1          | YDL226C                 | GCS1          |

| Predictions at threshold level 0.75 continued... |               |                         |               |
|--------------------------------------------------|---------------|-------------------------|---------------|
| Gene1 of predicted pair                          |               | Gene2 of predicted pair |               |
| Systematic Name                                  | Standard Name | Systematic Name         | Standard Name |
| YMR153W                                          | NUP53         | YPL137C                 | GIP3          |
| YDL006W                                          | PTC1          | YOR036W                 | PEP12         |
| YMR016C                                          | SOK2          | YLR441C                 | RPS1A         |
| YNL206C                                          | RTT106        | YHR111W                 | UBA4          |
| YDR379W                                          | RGA2          | YGL163C                 | RAD54         |
| YDR443C                                          | SSN2          | YMR153W                 | NUP53         |
| YDR323C                                          | PEP7          | YOR036W                 | PEP12         |
| YJL124C                                          | LSM1          | YDR310C                 | SUM1          |
| YFL023W                                          | BUD27         | YNL307C                 | MCK1          |
| YKL080W                                          | VMA5          | YKL041W                 | VPS24         |
| YNL307C                                          | MCK1          | YJR135C                 | MCM22         |
| YDL101C                                          | DUN1          | YMR055C                 | BUB2          |
| YPL105C                                          | YPL105C       | YML001W                 | YPT7          |
| YBR171W                                          | SEC66         | YIL008W                 | URM1          |
| YHR039C-A                                        | VMA10         | YPR030W                 | CSR2          |
| YDL116W                                          | NUP84         | YLR381W                 | CTF3          |
| YDL020C                                          | RPN4          | YPL079W                 | RPL21B        |
| YOR127W                                          | RGA1          | YBR084C-A               | RPL19A        |
| YDR254W                                          | CHL4          | YNL147W                 | LSM7          |
| YBR274W                                          | CHK1          | YLR320W                 | MMS22         |
| YGR159C                                          | NSR1          | YOR141C                 | ARP8          |
| YPL037C                                          | EGD1          | YER044C                 | ERG28         |
| YGR104C                                          | SRB5          | YDL002C                 | NHP10         |
| YGR104C                                          | SRB5          | YDR363W-A               | SEM1          |
| YDR129C                                          | SAC6          | YKR020W                 | VPS51         |
| YBR217W                                          | ATG12         | YMR152W                 | YIM1          |
| YPL057C                                          | SUR1          | YOR124C                 | UBP2          |
| YHR010W                                          | RPL27A        | YOR368W                 | RAD17         |
| YOR001W                                          | RRP6          | YOR124C                 | UBP2          |

| Predictions at threshold level 0.75 continued... |               |                         |               |
|--------------------------------------------------|---------------|-------------------------|---------------|
| Gene1 of predicted pair                          |               | Gene2 of predicted pair |               |
| Systematic Name                                  | Standard Name | Systematic Name         | Standard Name |
| YGR020C                                          | VMA7          | YML001W                 | YPT7          |
| YDR156W                                          | RPA14         | YJL095W                 | BCK1          |
| YLR192C                                          | HCR1          | YLR386W                 | VAC14         |
| YNL238W                                          | KEX2          | YPR030W                 | CSR2          |
| YGR249W                                          | MGA1          | YMR152W                 | YIM1          |
| YDR439W                                          | LRS4          | YGL163C                 | RAD54         |
| YLR094C                                          | GIS3          | YCR053W                 | THR4          |
| YDL161W                                          | ENT1          | YJL029C                 | VPS53         |
| YJL172W                                          | CPS1          | YBR019C                 | GAL10         |
| YOR001W                                          | RRP6          | YPL178W                 | CBC2          |
| YAL024C                                          | LTE1          | YHR081W                 | LRP1          |
| YJR083C                                          | ACF4          | YOR284W                 | HUA2          |
| YJL124C                                          | LSM1          | YDL155W                 | CLB3          |
| YKL048C                                          | ELM1          | YIR005W                 | IST3          |
| YGL163C                                          | RAD54         | YJL095W                 | BCK1          |
| YFL031W                                          | HAC1          | YDR207C                 | UME6          |
| YML088W                                          | UFO1          | YDR139C                 | RUB1          |
| YGL147C                                          | RPL9A         | YGL212W                 | VAM7          |
| YER139C                                          | YER139C       | YJR084W                 | CSN12         |
| YPL253C                                          | VIK1          | YJL183W                 | MNN11         |
| YMR038C                                          | CCS1          | YNL107W                 | YAF9          |
| YPL129W                                          | TAF14         | YNL030W                 | HHF2          |
| YBR108W                                          | YBR108W       | YMR016C                 | SOK2          |
| YMR167W                                          | MLH1          | YNL076W                 | MKS1          |
| YGR108W                                          | CLB1          | YGR054W                 | YGR054W       |
| YEL009C                                          | GCN4          | YMR091C                 | NPL6          |
| YLR337C                                          | VRP1          | YKR020W                 | VPS51         |
| YMR016C                                          | SOK2          | YGL003C                 | CDH1          |
| YPL161C                                          | BEM4          | YJR084W                 | CSN12         |

| Predictions at threshold level 0.75 continued... |               |                         |               |
|--------------------------------------------------|---------------|-------------------------|---------------|
| Gene1 of predicted pair                          |               | Gene2 of predicted pair |               |
| Systematic Name                                  | Standard Name | Systematic Name         | Standard Name |
| YDR334W                                          | SWR1          | YBR089C-A               | NHP6B         |
| YMR231W                                          | PEP5          | YDL077C                 | VAM6          |
| YLR234W                                          | TOP3          | YOL081W                 | IRA2          |
| YLR453C                                          | RIF2          | YER098W                 | UBP9          |
| YDR137W                                          | RGP1          | YMR054W                 | STV1          |
| YCR066W                                          | RAD18         | YER122C                 | GLO3          |
| YAL056W                                          | GPB2          | YOR107W                 | RGS2          |
| YNL068C                                          | FKH2          | YDL047W                 | SIT4          |
| YPL018W                                          | CTF19         | YEL056W                 | HAT2          |
| YGL212W                                          | VAM7          | YDR153C                 | ENT5          |
| YML016C                                          | PPZ1          | YLR429W                 | CRN1          |
| YDL006W                                          | PTC1          | YDR153C                 | ENT5          |
| YJL136C                                          | RPS21B        | YDR379W                 | RGA2          |
| YCR065W                                          | HCM1          | YER114C                 | BOI2          |
| YIL159W                                          | BNR1          | YBR019C                 | GAL10         |
| YBL008W                                          | HIR1          | YKR072C                 | SIS2          |
| YHR060W                                          | VMA22         | YML001W                 | YPT7          |
| YNL307C                                          | MCK1          | YPR120C                 | CLB5          |
| YOR290C                                          | SNF2          | YNR072W                 | HXT17         |
| YLR386W                                          | VAC14         | YNL225C                 | CNM67         |
| YNL288W                                          | CAF40         | YGR134W                 | CAF130        |
| YML016C                                          | PPZ1          | YOR358W                 | HAP5          |
| YCR077C                                          | PAT1          | YAL002W                 | VPS8          |
| YJL176C                                          | SWI3          | YBR057C                 | MUM2          |
| YDR477W                                          | SNF1          | YLR370C                 | ARC18         |
| YML001W                                          | YPT7          | YCR053W                 | THR4          |
| YMR224C                                          | MRE11         | YDR439W                 | LRS4          |
| YOR132W                                          | VPS17         | YBR171W                 | SEC66         |
| YLR288C                                          | MEC3          | YER162C                 | RAD4          |

| Predictions at threshold level 0.75 continued... |               |                         |               |
|--------------------------------------------------|---------------|-------------------------|---------------|
| Gene1 of predicted pair                          |               | Gene2 of predicted pair |               |
| Systematic Name                                  | Standard Name | Systematic Name         | Standard Name |
| YLR234W                                          | TOP3          | YGR184C                 | UBR1          |
| YDR422C                                          | SIP1          | YJR090C                 | GRR1          |
| YOR275C                                          | RIM20         | YKL041W                 | VPS24         |
| YKL116C                                          | PRR1          | YBL103C                 | RTG3          |
| YER110C                                          | KAP123        | YGR054W                 | YGR054W       |
| YBL008W                                          | HIR1          | YJR032W                 | CPR7          |
| YER116C                                          | SLX8          | YOR290C                 | SNF2          |
| YJL210W                                          | PEX2          | YGR077C                 | PEX8          |
| YMR273C                                          | ZDS1          | YPL256C                 | CLN2          |
| YOR035C                                          | SHE4          | YLR370C                 | ARC18         |
| YCR081W                                          | SRB8          | YLR371W                 | ROM2          |
| YBR171W                                          | SEC66         | YLR398C                 | SKI2          |
| YML094W                                          | GIM5          | YEL022W                 | GEA2          |
| YBL102W                                          | SFT2          | YOR069W                 | VPS5          |
| YNL264C                                          | PDR17         | YGL025C                 | PGD1          |
| YEL027W                                          | CUP5          | YHR060W                 | VMA22         |
| YHR134W                                          | WSS1          | YHR111W                 | UBA4          |
| YMR026C                                          | PEX12         | YBL103C                 | RTG3          |
| YKR020W                                          | VPS51         | YER122C                 | GLO3          |
| YPL234C                                          | TFP3          | YPR032W                 | SRO7          |
| YDR108W                                          | GSG1          | YPR051W                 | MAK3          |
| YIL162W                                          | SUC2          | YEL036C                 | ANP1          |
| YGR249W                                          | MGA1          | YNL238W                 | KEX2          |
| YDR103W                                          | STE5          | YDR309C                 | GIC2          |
| YMR199W                                          | CLN1          | YPL158C                 | YPL158C       |
| YNL248C                                          | RPA49         | YNL116W                 | DMA2          |
| YLR094C                                          | GIS3          | YMR214W                 | SCJ1          |
| YGL025C                                          | PGD1          | YOL121C                 | RPS19A        |
| YPR131C                                          | NAT3          | YPL106C                 | SSE1          |

| Predictions at threshold level 0.75 continued... |               |                         |               |
|--------------------------------------------------|---------------|-------------------------|---------------|
| Gene1 of predicted pair                          |               | Gene2 of predicted pair |               |
| Systematic Name                                  | Standard Name | Systematic Name         | Standard Name |
| YLR386W                                          | VAC14         | YOR270C                 | VPH1          |
| YNL025C                                          | SSN8          | YBL075C                 | SSA3          |
| YMR142C                                          | RPL13B        | YFR036W                 | CDC26         |
| YGL095C                                          | VPS45         | YDL047W                 | SIT4          |
| YGL087C                                          | MMS2          | YJL190C                 | RPS22A        |
| YBR290W                                          | BSD2          | YDR289C                 | RTT103        |
| YMR253C                                          | YMR253C       | YHR114W                 | BZZ1          |
| YDR448W                                          | ADA2          | YBL003C                 | HTA2          |
| YBR171W                                          | SEC66         | YPL137C                 | GIP3          |
| YKL204W                                          | EAP1          | YKL213C                 | DOA1          |
| YOR106W                                          | VAM3          | YGL223C                 | COG1          |
| YBR200W                                          | BEM1          | YJL058C                 | BIT61         |
| YJL053W                                          | PEP8          | YPL195W                 | APL5          |
| YCR053W                                          | THR4          | YEL060C                 | PRB1          |
| YMR142C                                          | RPL13B        | YOL081W                 | IRA2          |
| YDL116W                                          | NUP84         | YNL016W                 | PUB1          |
| YMR199W                                          | CLN1          | YJL136C                 | RPS21B        |
| YBR127C                                          | VMA2          | YGL095C                 | VPS45         |
| YOR043W                                          | WHI2          | YER122C                 | GLO3          |
| YDL002C                                          | NHP10         | YCR086W                 | CSM1          |
| YML115C                                          | VAN1          | YDR137W                 | RGP1          |
| YOR141C                                          | ARP8          | YAR014C                 | BUD14         |
| YPR018W                                          | RLF2          | YKL160W                 | ELF1          |
| YPR120C                                          | CLB5          | YPL158C                 | YPL158C       |
| YOR312C                                          | RPL20B        | YDR310C                 | SUM1          |
| YER129W                                          | SAK1          | YMR199W                 | CLN1          |
| YML117W                                          | NAB6          | YLR320W                 | MMS22         |
| YDR245W                                          | MNN10         | YMR109W                 | MYO5          |
| YBR200W                                          | BEM1          | YDL226C                 | GCS1          |

| Predictions at threshold level 0.75 continued... |               |                         |               |
|--------------------------------------------------|---------------|-------------------------|---------------|
| Gene1 of predicted pair                          |               | Gene2 of predicted pair |               |
| Systematic Name                                  | Standard Name | Systematic Name         | Standard Name |
| YNL288W                                          | CAF40         | YBR114W                 | RAD16         |
| YKL139W                                          | CTK1          | YAL002W                 | VPS8          |
| YLR360W                                          | VPS38         | YJL053W                 | PEP8          |
| YMR153W                                          | NUP53         | YGL124C                 | MON1          |
| YNL106C                                          | INP52         | YNL215W                 | IES2          |
| YHR086W                                          | NAM8          | YPR101W                 | SNT309        |
| YDR202C                                          | RAV2          | YPR036W                 | VMA13         |
| YDR443C                                          | SSN2          | YOR290C                 | SNF2          |
| YNL307C                                          | MCK1          | YMR167W                 | MLH1          |
| YIL076W                                          | SEC28         | YGL124C                 | MON1          |
| YJL124C                                          | LSM1          | YOL081W                 | IRA2          |
| YPL161C                                          | BEM4          | YPL234C                 | TFP3          |
| YFL031W                                          | HAC1          | YCR053W                 | THR4          |
| YKR020W                                          | VPS51         | YMR038C                 | CCS1          |
| YML103C                                          | NUP188        | YCR024C-A               | PMP1          |
| YOR332W                                          | VMA4          | YML115C                 | VAN1          |
| YOR066W                                          | MSA1          | YJL095W                 | BCK1          |
| YPR029C                                          | APL4          | YOR132W                 | VPS17         |
| YMR172W                                          | HOT1          | YHR111W                 | UBA4          |
| YHR060W                                          | VMA22         | YNL041C                 | COG6          |
| YPL037C                                          | EGD1          | YOL111C                 | MDY2          |
| YLR386W                                          | VAC14         | YDL006W                 | PTC1          |
| YML102W                                          | CAC2          | YJR090C                 | GRR1          |
| YMR199W                                          | CLN1          | YHR158C                 | KEL1          |
| YOR132W                                          | VPS17         | YDR310C                 | SUM1          |
| YMR133W                                          | REC114        | YEL060C                 | PRB1          |
| YDR108W                                          | GSG1          | YPR032W                 | SRO7          |
| YOR127W                                          | RGA1          | YDR363W-A               | SEM1          |
| YPL022W                                          | RAD1          | YMR199W                 | CLN1          |



| Predictions at threshold level 0.75 continued... |               |                         |               |
|--------------------------------------------------|---------------|-------------------------|---------------|
| Gene1 of predicted pair                          |               | Gene2 of predicted pair |               |
| Systematic Name                                  | Standard Name | Systematic Name         | Standard Name |
| YHR200W                                          | RPN10         | YMR276W                 | DSK2          |
| YNL307C                                          | MCK1          | YOR014W                 | RTS1          |
| YBR200W                                          | BEM1          | YOR001W                 | RRP6          |
| YML016C                                          | PPZ1          | YNL307C                 | MCK1          |
| YIL034C                                          | CAP2          | YPL050C                 | MNN9          |
| YBR217W                                          | ATG12         | YNL041C                 | COG6          |
| YLR191W                                          | PEX13         | YIL160C                 | POT1          |
| YNL238W                                          | KEX2          | YMR038C                 | CCS1          |
| YOR195W                                          | SLK19         | YKR048C                 | NAP1          |
| YGL115W                                          | SNF4          | YOL108C                 | INO4          |
| YNL025C                                          | SSN8          | YDR245W                 | MNN10         |
| YMR127C                                          | SAS2          | YPL253C                 | VIK1          |
| YNL201C                                          | PSY2          | YPR120C                 | CLB5          |
| YOR132W                                          | VPS17         | YOR112W                 | CEX1          |
| YOR337W                                          | TEA1          | YNL307C                 | MCK1          |
| YDR260C                                          | SWM1          | YPR119W                 | CLB2          |
| YHR134W                                          | WSS1          | YGR188C                 | BUB1          |
| YLR119W                                          | SRN2          | YGL003C                 | CDH1          |
| YJL029C                                          | VPS53         | YPR028W                 | YOP1          |
| YDR137W                                          | RGP1          | YDR310C                 | SUM1          |
| YNL069C                                          | RPL16B        | YGR020C                 | VMA7          |
| YOR332W                                          | VMA4          | YMR070W                 | MOT3          |
| YKL025C                                          | PAN3          | YPL018W                 | CTF19         |
| YMR253C                                          | YMR253C       | YPR119W                 | CLB2          |
| YOR023C                                          | AHC1          | YGL253W                 | HXK2          |
| YHR200W                                          | RPN10         | YAR014C                 | BUD14         |
| YKR014C                                          | YPT52         | YPR028W                 | YOP1          |
| YLR337C                                          | VRP1          | YCR086W                 | CSM1          |
| YMR224C                                          | MRE11         | YLR150W                 | STM1          |

| Predictions at threshold level 0.75 continued... |               |                         |               |
|--------------------------------------------------|---------------|-------------------------|---------------|
| Gene1 of predicted pair                          |               | Gene2 of predicted pair |               |
| Systematic Name                                  | Standard Name | Systematic Name         | Standard Name |
| YIL148W                                          | RPL40A        | YMR125W                 | STO1          |
| YFR031C-A                                        | RPL2A         | YML038C                 | YMD8          |
| YOR290C                                          | SNF2          | YNL041C                 | COG6          |
| YMR172W                                          | HOT1          | YJL095W                 | BCK1          |
| YOL126C                                          | MDH2          | YFL047W                 | RGD2          |
| YDR146C                                          | SWI5          | YLR425W                 | TUS1          |
| YFR010W                                          | UBP6          | YBR030W                 | YBR030W       |
| YMR224C                                          | MRE11         | YLR410W                 | VIP1          |
| YFL013C                                          | IES1          | YIL076W                 | SEC28         |
| YJL124C                                          | LSM1          | YGL175C                 | SAE2          |
| YKL032C                                          | IXR1          | YPL161C                 | BEM4          |
| YER044C                                          | ERG28         | YOR043W                 | WHI2          |
| YPL115C                                          | BEM3          | YJR032W                 | CPR7          |
| YHL020C                                          | OPI1          | YEL051W                 | VMA8          |
| YER110C                                          | KAP123        | YNL166C                 | BNI5          |
| YHR160C                                          | PEX18         | YGR077C                 | PEX8          |
| YBR030W                                          | YBR030W       | YBR280C                 | SAF1          |
| YNL215W                                          | IES2          | YJL183W                 | MNN11         |
| YBR194W                                          | SOY1          | YDR363W-A               | SEM1          |
| YLR386W                                          | VAC14         | YMR142C                 | RPL13B        |
| YFR010W                                          | UBP6          | YKR030W                 | GMH1          |
| YJR056C                                          | YJR056C       | YMR214W                 | SCJ1          |
| YNL297C                                          | MON2          | YHR115C                 | DMA1          |
| YGR104C                                          | SRB5          | YGR135W                 | PRE9          |
| YHR039C-A                                        | VMA10         | YJL095W                 | BCK1          |
| YDR477W                                          | SNF1          | YDR207C                 | UME6          |
| YLR360W                                          | VPS38         | YNL166C                 | BNI5          |
| YDL020C                                          | RPN4          | YNL107W                 | YAF9          |
| YBR108W                                          | YBR108W       | YNL307C                 | MCK1          |

| Predictions at threshold level 0.75 continued... |               |                         |               |
|--------------------------------------------------|---------------|-------------------------|---------------|
| Gene1 of predicted pair                          |               | Gene2 of predicted pair |               |
| Systematic Name                                  | Standard Name | Systematic Name         | Standard Name |
| YMR216C                                          | SKY1          | YKR001C                 | VPS1          |
| YDR101C                                          | ARX1          | YBR017C                 | KAP104        |
| YNL236W                                          | SIN4          | YJR005W                 | APL1          |
| YNL087W                                          | TCB2          | YDR358W                 | GGA1          |
| YCR065W                                          | HCM1          | YML016C                 | PPZ1          |
| YGL033W                                          | HOP2          | YBR173C                 | UMP1          |
| YIR005W                                          | IST3          | YOR124C                 | UBP2          |
| YJR084W                                          | CSN12         | YGR188C                 | BUB1          |
| YPL256C                                          | CLN2          | YHL011C                 | PRS3          |
| YOR064C                                          | YNG1          | YNL030W                 | HHF2          |
| YHR156C                                          | LIN1          | YLR320W                 | MMS22         |
| YPL024W                                          | RMI1          | YEL053C                 | MAK10         |
| YDL160C                                          | DHH1          | YPL256C                 | CLN2          |
| YPL115C                                          | BEM3          | YJR090C                 | GRR1          |
| YNL201C                                          | PSY2          | YNL054W                 | VAC7          |
| YHR111W                                          | UBA4          | YJL190C                 | RPS22A        |
| YDR448W                                          | ADA2          | YDR146C                 | SWI5          |
| YGR072W                                          | UPF3          | YNL107W                 | YAF9          |
| YPR051W                                          | MAK3          | YGL115W                 | SNF4          |
| YML095C                                          | RAD10         | YGR135W                 | PRE9          |
| YPR017C                                          | DSS4          | YML038C                 | YMD8          |
| YNL307C                                          | MCK1          | YMR133W                 | REC114        |
| YKL126W                                          | YPK1          | YPR030W                 | CSR2          |
| YHR156C                                          | LIN1          | YER162C                 | RAD4          |
| YER162C                                          | RAD4          | YDL077C                 | VAM6          |
| YDR477W                                          | SNF1          | YPL248C                 | GAL4          |
| YBR173C                                          | UMP1          | YLR398C                 | SKI2          |
| YML016C                                          | PPZ1          | YGL115W                 | SNF4          |
| YHR200W                                          | RPN10         | YDR469W                 | SDC1          |

| Predictions at threshold level 0.75 continued... |               |                         |               |
|--------------------------------------------------|---------------|-------------------------|---------------|
| Gene1 of predicted pair                          |               | Gene2 of predicted pair |               |
| Systematic Name                                  | Standard Name | Systematic Name         | Standard Name |
| YDR254W                                          | CHL4          | YHR115C                 | DMA1          |
| YBR057C                                          | MUM2          | YGL163C                 | RAD54         |
| YDR443C                                          | SSN2          | YDR358W                 | GGA1          |
| YDR004W                                          | RAD57         | YPL057C                 | SUR1          |
| YLR095C                                          | IOC2          | YPL137C                 | GIP3          |
| YFR010W                                          | UBP6          | YMR214W                 | SCJ1          |
| YBR290W                                          | BSD2          | YER110C                 | KAP123        |
| YIL076W                                          | SEC28         | YNR032W                 | PPG1          |
| YKR099W                                          | BAS1          | YLR398C                 | SKI2          |
| YNL291C                                          | MID1          | YGL115W                 | SNF4          |
| YMR224C                                          | MRE11         | YOR014W                 | RTS1          |
| YMR026C                                          | PEX12         | YBR108W                 | YBR108W       |
| YOR270C                                          | VPH1          | YKL126W                 | YPK1          |
| YPL057C                                          | SUR1          | YKL048C                 | ELM1          |
| YLR234W                                          | TOP3          | YPL057C                 | SUR1          |
| YDL005C                                          | MED2          | YLR182W                 | SWI6          |
| YMR026C                                          | PEX12         | YOL044W                 | PEX15         |
| YKL007W                                          | CAP1          | YAL024C                 | LTE1          |
| YCL001W                                          | RER1          | YER162C                 | RAD4          |
| YMR142C                                          | RPL13B        | YDR484W                 | VPS52         |
| YNL291C                                          | MID1          | YOR109W                 | INP53         |
| YEL060C                                          | PRB1          | YDR310C                 | SUM1          |
| YOR023C                                          | AHC1          | YBL021C                 | HAP3          |
| YLR315W                                          | NKP2          | YOL081W                 | IRA2          |
| YLR381W                                          | CTF3          | YEL056W                 | HAT2          |
| YDR156W                                          | RPA14         | YMR224C                 | MRE11         |
| YGR252W                                          | GCN5          | YOL148C                 | SPT20         |
| YNL307C                                          | MCK1          | YKR001C                 | VPS1          |
| YDR192C                                          | NUP42         | YBR017C                 | KAP104        |

| Predictions at threshold level 0.75 continued... |               |                         |               |
|--------------------------------------------------|---------------|-------------------------|---------------|
| Gene1 of predicted pair                          |               | Gene2 of predicted pair |               |
| Systematic Name                                  | Standard Name | Systematic Name         | Standard Name |
| YDL101C                                          | DUN1          | YOL090W                 | MSH2          |
| YNL288W                                          | CAF40         | YNR052C                 | POP2          |
| YMR016C                                          | SOK2          | YLR320W                 | MMS22         |
| YKL116C                                          | PRR1          | YER044C                 | ERG28         |
| YPR051W                                          | MAK3          | YML038C                 | YMD8          |
| YNL041C                                          | COG6          | YJL095W                 | BCK1          |
| YOR112W                                          | CEX1          | YEL053C                 | MAK10         |
| YOL030W                                          | GAS5          | YBR082C                 | UBC4          |
| YDR329C                                          | PEX3          | YOL147C                 | PEX11         |
| YPL024W                                          | RMI1          | YOL111C                 | MDY2          |
| YHR060W                                          | VMA22         | YDL083C                 | RPS16B        |
| YDR108W                                          | GSG1          | YJL036W                 | SNX4          |
| YOR001W                                          | RRP6          | YCR077C                 | PAT1          |
| YHR134W                                          | WSS1          | YNL016W                 | PUB1          |
| YFR010W                                          | UBP6          | YOR124C                 | UBP2          |
| YHL020C                                          | OPI1          | YNL051W                 | COG5          |
| YBR217W                                          | ATG12         | YLR386W                 | VAC14         |
| YNL116W                                          | DMA2          | YGL031C                 | RPL24A        |
| YMR055C                                          | BUB2          | YCR086W                 | CSM1          |
| YNL238W                                          | KEX2          | YBR036C                 | CSG2          |
| YLR090W                                          | XDJ1          | YLR320W                 | MMS22         |
| YIL034C                                          | CAP2          | YLR216C                 | CPR6          |
| YOR368W                                          | RAD17         | YNL107W                 | YAF9          |
| YBL008W                                          | HIR1          | YLR079W                 | SIC1          |
| YNL032W                                          | SIW14         | YER139C                 | YER139C       |
| YMR198W                                          | CIK1          | YPR119W                 | CLB2          |
| YNL087W                                          | TCB2          | YJL095W                 | BCK1          |
| YER115C                                          | SPR6          | YPL178W                 | CBC2          |
| YIR009W                                          | MSL1          | YDR184C                 | ATC1          |

| Predictions at threshold level 0.75 continued... |               |                         |               |
|--------------------------------------------------|---------------|-------------------------|---------------|
| Gene1 of predicted pair                          |               | Gene2 of predicted pair |               |
| Systematic Name                                  | Standard Name | Systematic Name         | Standard Name |
| YFL013C                                          | IES1          | YOR124C                 | UBP2          |
| YBL008W                                          | HIR1          | YNL107W                 | YAF9          |
| YBL058W                                          | SHP1          | YBR036C                 | CSG2          |
| YDR484W                                          | VPS52         | YOL111C                 | MDY2          |
| YMR198W                                          | CIK1          | YLR058C                 | SHM2          |
| YFL023W                                          | BUD27         | YPL256C                 | CLN2          |
| YEL053C                                          | MAK10         | YGR188C                 | BUB1          |
| YLR377C                                          | FBP1          | YNR065C                 | YNR065C       |
| YOR069W                                          | VPS5          | YKR020W                 | VPS51         |
| YLR079W                                          | SIC1          | YGL115W                 | SNF4          |
| YDL083C                                          | RPS16B        | YFR036W                 | CDC26         |
| YLR119W                                          | SRN2          | YMR142C                 | RPL13B        |
| YEL065W                                          | SIT1          | YOL121C                 | RPS19A        |
| YBR171W                                          | SEC66         | YPL227C                 | ALG5          |
| YFR010W                                          | UBP6          | YLR371W                 | ROM2          |
| YHR084W                                          | STE12         | YDL159W                 | STE7          |
| YJR135C                                          | MCM22         | YLR370C                 | ARC18         |
| YLR452C                                          | SST2          | YDR289C                 | RTT103        |
| YHR056C                                          | RSC30         | YCL061C                 | MRC1          |
| YOR127W                                          | RGA1          | YCL001W                 | RER1          |
| YMR055C                                          | BUB2          | YPR119W                 | CLB2          |
| YDR289C                                          | RTT103        | YML112W                 | CTK3          |
| YGR188C                                          | BUB1          | YAL002W                 | VPS8          |
| YGR252W                                          | GCN5          | YEL056W                 | HAT2          |
| YBR200W                                          | BEM1          | YFR036W                 | CDC26         |
| YFL013C                                          | IES1          | YAL002W                 | VPS8          |
| YJR135C                                          | MCM22         | YJL095W                 | BCK1          |
| YOL111C                                          | MDY2          | YJL183W                 | MNN11         |
| YDR335W                                          | MSN5          | YCR077C                 | PAT1          |

| Predictions at threshold level 0.75 continued... |               |                         |               |
|--------------------------------------------------|---------------|-------------------------|---------------|
| Gene1 of predicted pair                          |               | Gene2 of predicted pair |               |
| Systematic Name                                  | Standard Name | Systematic Name         | Standard Name |
| YDR225W                                          | HTA1          | YDL155W                 | CLB3          |
| YDR320C                                          | SWA2          | YOL108C                 | INO4          |
| YPL234C                                          | TFP3          | YMR054W                 | STV1          |
| YGL078C                                          | DBP3          | YJL172W                 | CPS1          |
| YHR156C                                          | LIN1          | YOR327C                 | SNC2          |
| YJL136C                                          | RPS21B        | YOR275C                 | RIM20         |
| YOR033C                                          | EXO1          | YDR076W                 | RAD55         |
| YJL154C                                          | VPS35         | YKL048C                 | ELM1          |
| YNL106C                                          | INP52         | YCR088W                 | ABP1          |
| YLR399C                                          | BDF1          | YCR086W                 | CSM1          |
| YDR457W                                          | TOM1          | YLL039C                 | UBI4          |
| YLR119W                                          | SRN2          | YKL126W                 | YPK1          |
| YML115C                                          | VAN1          | YMR230W                 | RPS10B        |
| YFR010W                                          | UBP6          | YGR232W                 | NAS6          |
| YHR012W                                          | VPS29         | YJL183W                 | MNN11         |
| YGR105W                                          | VMA21         | YJL183W                 | MNN11         |
| YPL024W                                          | RMI1          | YOR337W                 | TEA1          |
| YLR058C                                          | SHM2          | YDL226C                 | GCS1          |
| YLR148W                                          | PEP3          | YDL161W                 | ENT1          |
| YMR224C                                          | MRE11         | YDL002C                 | NHP10         |
| YPL086C                                          | ELP3          | YHR187W                 | IKI1          |
| YPR018W                                          | RLF2          | YLR352W                 | YLR352W       |
| YEL053C                                          | MAK10         | YHR012W                 | VPS29         |
| YDR245W                                          | MNN10         | YPL161C                 | BEM4          |
| YPR051W                                          | MAK3          | YNL107W                 | YAF9          |
| YJL183W                                          | MNN11         | YDR207C                 | UME6          |
| YLR360W                                          | VPS38         | YJR084W                 | CSN12         |
| YMR153W                                          | NUP53         | YBR036C                 | CSG2          |
| YBL102W                                          | SFT2          | YOR112W                 | CEX1          |

| Predictions at threshold level 0.75 continued... |               |                         |               |
|--------------------------------------------------|---------------|-------------------------|---------------|
| Gene1 of predicted pair                          |               | Gene2 of predicted pair |               |
| Systematic Name                                  | Standard Name | Systematic Name         | Standard Name |
| YOR270C                                          | VPH1          | YBR036C                 | CSG2          |
| YPL195W                                          | APL5          | YNL076W                 | MKS1          |
| YLR095C                                          | IOC2          | YDR477W                 | SNF1          |
| YCR077C                                          | PAT1          | YEL013W                 | VAC8          |
| YBL058W                                          | SHP1          | YDL083C                 | RPS16B        |
| YPR046W                                          | MCM16         | YLR370C                 | ARC18         |
| YCL037C                                          | SRO9          | YKL213C                 | DOA1          |
| YHL020C                                          | OPI1          | YML071C                 | COG8          |
| YLR191W                                          | PEX13         | YKL041W                 | VPS24         |
| YIL002C                                          | INP51         | YMR070W                 | MOT3          |
| YOR026W                                          | BUB3          | YGL190C                 | CDC55         |
| YOR023C                                          | AHC1          | YPL018W                 | CTF19         |
| YCR065W                                          | HCM1          | YBR200W                 | BEM1          |
| YBR030W                                          | YBR030W       | YDR137W                 | RGP1          |
| YKL126W                                          | YPK1          | YER044C                 | ERG28         |
| YDL192W                                          | ARF1          | YLR398C                 | SKI2          |
| YBR030W                                          | YBR030W       | YLR441C                 | RPS1A         |
| YIL053W                                          | RHR2          | YBL025W                 | RRN10         |
| YLR452C                                          | SST2          | YBR280C                 | SAF1          |
| YDR443C                                          | SSN2          | YFL028C                 | CAF16         |
| YLR447C                                          | VMA6          | YGR188C                 | BUB1          |
| YOR106W                                          | VAM3          | YDR310C                 | SUM1          |
| YEL027W                                          | CUP5          | YPL234C                 | TFP3          |
| YHR010W                                          | RPL27A        | YJL190C                 | RPS22A        |
| YGR105W                                          | VMA21         | YEL051W                 | VMA8          |
| YLR360W                                          | VPS38         | YOR112W                 | CEX1          |
| YMR224C                                          | MRE11         | YNL225C                 | CNM67         |
| YNL032W                                          | SIW14         | YNL238W                 | KEX2          |
| YLR094C                                          | GIS3          | YHR039C-A               | VMA10         |



| Predictions at threshold level 0.75 continued... |               |                         |               |
|--------------------------------------------------|---------------|-------------------------|---------------|
| Gene1 of predicted pair                          |               | Gene2 of predicted pair |               |
| Systematic Name                                  | Standard Name | Systematic Name         | Standard Name |
| YLR102C                                          | APC9          | YFR036W                 | CDC26         |
| YNL106C                                          | INP52         | YKL048C                 | ELM1          |
| YJL140W                                          | RPB4          | YNL030W                 | HHF2          |
| YNR052C                                          | POP2          | YDR318W                 | MCM21         |
| YNL199C                                          | GCR2          | YGR270W                 | YTA7          |
| YBR108W                                          | YBR108W       | YLR180W                 | SAM1          |
| YDL101C                                          | DUN1          | YNR052C                 | POP2          |
| YPL194W                                          | DDC1          | YGL100W                 | SEH1          |
| YKR046C                                          | PET10         | YMR152W                 | YIM1          |
| YDR443C                                          | SSN2          | YCR053W                 | THR4          |
| YLR381W                                          | CTF3          | YPR046W                 | MCM16         |
| YEL056W                                          | HAT2          | YAL002W                 | VPS8          |
| YDR200C                                          | VPS64         | YJR035W                 | RAD26         |
| YHR200W                                          | RPN10         | YMR133W                 | REC114        |
| YIL076W                                          | SEC28         | YER144C                 | UBP5          |
| YLR398C                                          | SKI2          | YMR230W                 | RPS10B        |
| YML013W                                          | UBX2          | YLR032W                 | RAD5          |
| YOR358W                                          | HAP5          | YHR012W                 | VPS29         |
| YDR129C                                          | SAC6          | YDR440W                 | DOT1          |
| YOR140W                                          | SFL1          | YNL236W                 | SIN4          |
| YLR095C                                          | IOC2          | YDR358W                 | GGA1          |
| YAL024C                                          | LTE1          | YJL006C                 | CTK2          |
| YKL139W                                          | CTK1          | YDL002C                 | NHP10         |
| YIR005W                                          | IST3          | YDR318W                 | MCM21         |
| YLR429W                                          | CRN1          | YOL091W                 | SPO21         |
| YPR051W                                          | MAK3          | YHR039C-A               | VMA10         |
| YKL101W                                          | HSL1          | YDL047W                 | SIT4          |
| YOL126C                                          | MDH2          | YMR125W                 | STO1          |
| YER144C                                          | UBP5          | YGL003C                 | CDH1          |

| Predictions at threshold level 0.75 continued... |               |                         |               |
|--------------------------------------------------|---------------|-------------------------|---------------|
| Gene1 of predicted pair                          |               | Gene2 of predicted pair |               |
| Systematic Name                                  | Standard Name | Systematic Name         | Standard Name |
| YLR090W                                          | XDJ1          | YJL172W                 | CPS1          |
| YLR234W                                          | TOP3          | YKL114C                 | APN1          |
| YDR477W                                          | SNF1          | YDR261C                 | EXG2          |
| YPL024W                                          | RMI1          | YPL018W                 | CTF19         |
| YLR399C                                          | BDF1          | YPL018W                 | CTF19         |
| YBR217W                                          | ATG12         | YLR370C                 | ARC18         |
| YPR046W                                          | MCM16         | YDR200C                 | VPS64         |
| YNL106C                                          | INP52         | YOL081W                 | IRA2          |
| YPL024W                                          | RMI1          | YKR035W-A               | DID2          |
| YAL024C                                          | LTE1          | YNL215W                 | IES2          |
| YPR131C                                          | NAT3          | YBR200W                 | BEM1          |
| YLR191W                                          | PEX13         | YOL044W                 | PEX15         |
| YPL042C                                          | SSN3          | YCR077C                 | PAT1          |
| YLR095C                                          | IOC2          | YER139C                 | YER139C       |
| YPL042C                                          | SSN3          | YMR198W                 | CIK1          |
| YKL048C                                          | ELM1          | YDR130C                 | FIN1          |
| YDL185W                                          | TFP1          | YLR452C                 | SST2          |
| YIL008W                                          | URM1          | YJR135C                 | MCM22         |
| YJR032W                                          | CPR7          | YER040W                 | GLN3          |
| YLR452C                                          | SST2          | YER162C                 | RAD4          |
| YKR046C                                          | PET10         | YKL140W                 | TGL1          |
| YDR254W                                          | CHL4          | YGR270W                 | YTA7          |
| YDR383C                                          | NKP1          | YOL081W                 | IRA2          |
| YAR042W                                          | SWH1          | YHR195W                 | NVJ1          |
| YGL163C                                          | RAD54         | YEL056W                 | HAT2          |
| YJR024C                                          | MDE1          | YER110C                 | KAP123        |
| YLR093C                                          | NYV1          | YDR358W                 | GGA1          |
| YPR072W                                          | NOT5          | YBR009C                 | HHF1          |
| YFR030W                                          | MET10         | YDR289C                 | RTT103        |

| Predictions at threshold level 0.75 continued... |               |                         |               |
|--------------------------------------------------|---------------|-------------------------|---------------|
| Gene1 of predicted pair                          |               | Gene2 of predicted pair |               |
| Systematic Name                                  | Standard Name | Systematic Name         | Standard Name |
| YBR200W                                          | BEM1          | YNL236W                 | SIN4          |
| YDR245W                                          | MNN10         | YER096W                 | SHC1          |
| YER110C                                          | KAP123        | YDL155W                 | CLB3          |
| YGL147C                                          | RPL9A         | YJR056C                 | YJR056C       |
| YOR332W                                          | VMA4          | YNL238W                 | KEX2          |
| YDR484W                                          | VPS52         | YBR036C                 | CSG2          |
| YNL087W                                          | TCB2          | YLR093C                 | NYV1          |
| YOR290C                                          | SNF2          | YOL081W                 | IRA2          |
| YDR379W                                          | RGA2          | YGL031C                 | RPL24A        |
| YIL076W                                          | SEC28         | YDR245W                 | MNN10         |
| YPL024W                                          | RMI1          | YGL087C                 | MMS2          |
| YKL126W                                          | YPK1          | YML001W                 | YPT7          |
| YDR137W                                          | RGP1          | YNR072W                 | HXT17         |
| YHR082C                                          | KSP1          | YPR119W                 | CLB2          |
| YHL031C                                          | GOS1          | YNL051W                 | COG5          |
| YDR261C                                          | EXG2          | YER162C                 | RAD4          |
| YGR019W                                          | UGA1          | YIL008W                 | URM1          |
| YML095C                                          | RAD10         | YOL090W                 | MSH2          |
| YBL019W                                          | APN2          | YCR066W                 | RAD18         |
| YPR120C                                          | CLB5          | YOR014W                 | RTS1          |
| YKL025C                                          | PAN3          | YOR358W                 | HAP5          |
| YCR086W                                          | CSM1          | YPL018W                 | CTF19         |
| YLR381W                                          | CTF3          | YER110C                 | KAP123        |
| YLR337C                                          | VRP1          | YDL223C                 | HBT1          |
| YLR386W                                          | VAC14         | YGL163C                 | RAD54         |
| YDR383C                                          | NKP1          | YAR014C                 | BUD14         |
| YBR019C                                          | GAL10         | YDR310C                 | SUM1          |
| YLR288C                                          | MEC3          | YGL003C                 | CDH1          |
| YLR006C                                          | SSK1          | YCR073C                 | SSK22         |

| Predictions at threshold level 0.75 continued... |               |                         |               |
|--------------------------------------------------|---------------|-------------------------|---------------|
| Gene1 of predicted pair                          |               | Gene2 of predicted pair |               |
| Systematic Name                                  | Standard Name | Systematic Name         | Standard Name |
| YEL065W                                          | SIT1          | YDR484W                 | VPS52         |
| YBR030W                                          | YBR030W       | YFR036W                 | CDC26         |
| YHL031C                                          | GOS1          | YFL048C                 | EMP47         |
| YBR057C                                          | MUM2          | YDR363W-A               | SEM1          |
| YLR182W                                          | SWI6          | YGL252C                 | RTG2          |
| YLR399C                                          | BDF1          | YDR227W                 | SIR4          |
| YFR040W                                          | SAP155        | YDL047W                 | SIT4          |
| YJR140C                                          | HIR3          | YLR435W                 | TSR2          |
| YNL248C                                          | RPA49         | YDR183W                 | PLP1          |
| YJL095W                                          | BCK1          | YDR207C                 | UME6          |
| YKL048C                                          | ELM1          | YLR398C                 | SKI2          |
| YBR173C                                          | UMP1          | YDR207C                 | UME6          |
| YHR134W                                          | WSS1          | YOL090W                 | MSH2          |
| YCL001W                                          | RER1          | YKR030W                 | GMH1          |
| YKL116C                                          | PRR1          | YDL184C                 | RPL41A        |
| YER144C                                          | UBP5          | YLR398C                 | SKI2          |
| YJL154C                                          | VPS35         | YGL054C                 | ERV14         |
| YOL111C                                          | MDY2          | YOL081W                 | IRA2          |
| YKL139W                                          | CTK1          | YNL253W                 | TEX1          |
| YEL009C                                          | GCN4          | YDR176W                 | NGG1          |
| YEL053C                                          | MAK10         | YMR311C                 | GLC8          |
| YGR104C                                          | SRB5          | YGR252W                 | GCN5          |
| YDL155W                                          | CLB3          | YKL041W                 | VPS24         |
| YBL103C                                          | RTG3          | YDL077C                 | VAM6          |
| YNL021W                                          | HDA1          | YPR119W                 | CLB2          |
| YMR026C                                          | PEX12         | YDR137W                 | RGP1          |
| YDR137W                                          | RGP1          | YNL238W                 | KEX2          |
| YLR360W                                          | VPS38         | YLR425W                 | TUS1          |
| YPL037C                                          | EGD1          | YPL120W                 | VPS30         |

| Predictions at threshold level 0.75 continued... |               |                         |               |
|--------------------------------------------------|---------------|-------------------------|---------------|
| Gene1 of predicted pair                          |               | Gene2 of predicted pair |               |
| Systematic Name                                  | Standard Name | Systematic Name         | Standard Name |
| YDR080W                                          | VPS41         | YAL002W                 | VPS8          |
| YMR284W                                          | YKU70         | YLR410W                 | VIP1          |
| YCR081W                                          | SRB8          | YJL095W                 | BCK1          |
| YGL174W                                          | BUD13         | YCR077C                 | PAT1          |
| YPL180W                                          | TCO89         | YJL183W                 | MNN11         |
| YBR171W                                          | SEC66         | YKR014C                 | YPT52         |
| YGL223C                                          | COG1          | YML071C                 | COG8          |
| YLR441C                                          | RPS1A         | YLR320W                 | MMS22         |
| YJR005W                                          | APL1          | YDR200C                 | VPS64         |
| YLR447C                                          | VMA6          | YPL018W                 | CTF19         |
| YOR035C                                          | SHE4          | YMR230W                 | RPS10B        |
| YHL031C                                          | GOS1          | YJR040W                 | GEF1          |
| YDR245W                                          | MNN10         | YOR375C                 | GDH1          |
| YHR156C                                          | LIN1          | YHR039C-A               | VMA10         |
| YHL031C                                          | GOS1          | YDR310C                 | SUM1          |
| YFL023W                                          | BUD27         | YML071C                 | COG8          |
| YNL054W                                          | VAC7          | YBR107C                 | IML3          |
| YJR056C                                          | YJR056C       | YML071C                 | COG8          |
| YEL065W                                          | SIT1          | YDR137W                 | RGP1          |
| YHR114W                                          | BZZ1          | YAR014C                 | BUD14         |
| YLR435W                                          | TSR2          | YMR167W                 | MLH1          |
| YGL115W                                          | SNF4          | YLR398C                 | SKI2          |
| YKR099W                                          | BAS1          | YBR019C                 | GAL10         |
| YDR378C                                          | LSM6          | YGL252C                 | RTG2          |
| YKL160W                                          | ELF1          | YAL002W                 | VPS8          |
| YMR224C                                          | MRE11         | YLR315W                 | NKP2          |
| YCR077C                                          | PAT1          | YKL041W                 | VPS24         |
| YDL116W                                          | NUP84         | YIL036W                 | CST6          |
| YBR200W                                          | BEM1          | YPR120C                 | CLB5          |

| Predictions at threshold level 0.75 continued... |               |                         |               |
|--------------------------------------------------|---------------|-------------------------|---------------|
| Gene1 of predicted pair                          |               | Gene2 of predicted pair |               |
| Systematic Name                                  | Standard Name | Systematic Name         | Standard Name |
| YDR382W                                          | RPP2B         | YKR026C                 | GCN3          |
| YDR202C                                          | RAV2          | YGL212W                 | VAM7          |
| YLR119W                                          | SRN2          | YOR337W                 | TEA1          |
| YKR020W                                          | VPS51         | YKL041W                 | VPS24         |
| YER139C                                          | YER139C       | YMR311C                 | GLC8          |
| YKL032C                                          | IXR1          | YHR115C                 | DMA1          |
| YGR252W                                          | GCN5          | YBL002W                 | HTB2          |
| YOR043W                                          | WHI2          | YDR358W                 | GGA1          |
| YNL069C                                          | RPL16B        | YCR066W                 | RAD18         |
| YDL020C                                          | RPN4          | YLR386W                 | VAC14         |
| YMR224C                                          | MRE11         | YKR072C                 | SIS2          |
| YBR171W                                          | SEC66         | YBR107C                 | IML3          |
| YML016C                                          | PPZ1          | YOR275C                 | RIM20         |
| YKL126W                                          | YPK1          | YOR066W                 | MSA1          |
| YKR072C                                          | SIS2          | YGL163C                 | RAD54         |
| YPR007C                                          | REC8          | YPR119W                 | CLB2          |
| YBR228W                                          | SLX1          | YHR077C                 | NMD2          |
| YER162C                                          | RAD4          | YBR036C                 | CSG2          |
| YGL135W                                          | RPL1B         | YLR018C                 | POM34         |
| YBR126C                                          | TPS1          | YER139C                 | YER139C       |
| YML016C                                          | PPZ1          | YMR055C                 | BUB2          |
| YML088W                                          | UFO1          | YJL204C                 | RCY1          |
| YJL004C                                          | SYS1          | YNR032W                 | PPG1          |
| YAL024C                                          | LTE1          | YGL151W                 | NUT1          |
| YJL124C                                          | LSM1          | YKL213C                 | DOA1          |
| YDR101C                                          | ARX1          | YKR048C                 | NAP1          |
| YMR116C                                          | ASC1          | YGL200C                 | EMP24         |
| YML071C                                          | COG8          | YDL192W                 | ARF1          |
| YER116C                                          | SLX8          | YML013W                 | UBX2          |

| Predictions at threshold level 0.75 continued... |               |                         |               |
|--------------------------------------------------|---------------|-------------------------|---------------|
| Gene1 of predicted pair                          |               | Gene2 of predicted pair |               |
| Systematic Name                                  | Standard Name | Systematic Name         | Standard Name |
| YOR106W                                          | VAM3          | YER120W                 | SCS2          |
| YGL115W                                          | SNF4          | YHR039C-A               | VMA10         |
| YLR192C                                          | HCR1          | YDL223C                 | HBT1          |
| YMR142C                                          | RPL13B        | YJL183W                 | MNN11         |
| YPL256C                                          | CLN2          | YOL081W                 | IRA2          |
| YMR142C                                          | RPL13B        | YNL076W                 | MKS1          |
| YKL116C                                          | PRR1          | YJL095W                 | BCK1          |
| YMR202W                                          | ERG2          | YER044C                 | ERG28         |
| YMR116C                                          | ASC1          | YMR038C                 | CCS1          |
| YGL178W                                          | MPT5          | YDR485C                 | VPS72         |
| YLR094C                                          | GIS3          | YDL149W                 | ATG9          |
| YHR161C                                          | YAP1801       | YLR396C                 | VPS33         |
| YIL034C                                          | CAP2          | YKL204W                 | EAP1          |
| YHL020C                                          | OPI1          | YER162C                 | RAD4          |
| YDR174W                                          | HMO1          | YDR289C                 | RTT103        |
| YLR018C                                          | POM34         | YMR273C                 | ZDS1          |
| YDR484W                                          | VPS52         | YJL204C                 | RCY1          |
| YMR198W                                          | CIK1          | YJR035W                 | RAD26         |
| YDR080W                                          | VPS41         | YPL037C                 | EGD1          |
| YPL024W                                          | RMI1          | YDR261C                 | EXG2          |
| YBL058W                                          | SHP1          | YOL121C                 | RPS19A        |
| YGR078C                                          | PAC10         | YHR056C                 | RSC30         |
| YPR036W                                          | VMA13         | YMR214W                 | SCJ1          |
| YMR153W                                          | NUP53         | YBR108W                 | YBR108W       |
| YJR040W                                          | GEF1          | YER122C                 | GLO3          |
| YNL087W                                          | TCB2          | YOL111C                 | MDY2          |
| YPR017C                                          | DSS4          | YGR072W                 | UPF3          |
| YBR126C                                          | TPS1          | YBR030W                 | YBR030W       |
| YDL155W                                          | CLB3          | YDR440W                 | DOT1          |

| Predictions at threshold level 0.75 continued... |               |                         |               |
|--------------------------------------------------|---------------|-------------------------|---------------|
| Gene1 of predicted pair                          |               | Gene2 of predicted pair |               |
| Systematic Name                                  | Standard Name | Systematic Name         | Standard Name |
| YBR107C                                          | IML3          | YDR171W                 | HSP42         |
| YLR337C                                          | VRP1          | YOR127W                 | RGA1          |
| YMR016C                                          | SOK2          | YJR084W                 | CSN12         |
| YJL154C                                          | VPS35         | YGL253W                 | HXK2          |
| YPR046W                                          | MCM16         | YJL183W                 | MNN11         |
| YCR020C-A                                        | MAK31         | YAL002W                 | VPS8          |
| YPL253C                                          | VIK1          | YLR254C                 | NDL1          |
| YNL288W                                          | CAF40         | YPL042C                 | SSN3          |
| YDR382W                                          | RPP2B         | YPL220W                 | RPL1A         |
| YJR135C                                          | MCM22         | YAR014C                 | BUD14         |
| YOR001W                                          | RRP6          | YDR137W                 | RGP1          |
| YDR129C                                          | SAC6          | YAL002W                 | VPS8          |
| YDL116W                                          | NUP84         | YCR024C-A               | PMP1          |
| YMR142C                                          | RPL13B        | YER040W                 | GLN3          |
| YJL176C                                          | SWI3          | YJR084W                 | CSN12         |
| YJL060W                                          | BNA3          | YDL226C                 | GCS1          |
| YMR055C                                          | BUB2          | YFR036W                 | CDC26         |
| YER120W                                          | SCS2          | YLR309C                 | IMH1          |
| YBR260C                                          | RGD1          | YNL090W                 | RHO2          |
| YBR215W                                          | HPC2          | YCL037C                 | SRO9          |
| YJL029C                                          | VPS53         | YDL226C                 | GCS1          |
| YGR020C                                          | VMA7          | YDR310C                 | SUM1          |
| YBL102W                                          | SFT2          | YHR039C-A               | VMA10         |
| YBL078C                                          | ATG8          | YNL223W                 | ATG4          |
| YNL288W                                          | CAF40         | YAL002W                 | VPS8          |
| YLR254C                                          | NDL1          | YPL038W                 | MET31         |
| YEL050C                                          | RML2          | YPL106C                 | SSE1          |
| YBR126C                                          | TPS1          | YMR311C                 | GLC8          |
| YDR245W                                          | MNN10         | YFL048C                 | EMP47         |



| Predictions at threshold level 0.75 continued... |               |                         |               |
|--------------------------------------------------|---------------|-------------------------|---------------|
| Gene1 of predicted pair                          |               | Gene2 of predicted pair |               |
| Systematic Name                                  | Standard Name | Systematic Name         | Standard Name |
| YJL154C                                          | VPS35         | YPL253C                 | VIK1          |
| YDR293C                                          | SSD1          | YNL166C                 | BNI5          |
| YNL238W                                          | KEX2          | YGL003C                 | CDH1          |
| YLR360W                                          | VPS38         | YGL151W                 | NUT1          |
| YIL159W                                          | BNR1          | YDR310C                 | SUM1          |
| YOL145C                                          | CTR9          | YDR440W                 | DOT1          |
| YJL172W                                          | CPS1          | YER162C                 | RAD4          |
| YDR004W                                          | RAD57         | YMR198W                 | CIK1          |
| YJL154C                                          | VPS35         | YNL297C                 | MON2          |
| YNL031C                                          | HHT2          | YDR227W                 | SIR4          |
| YOR195W                                          | SLK19         | YNL307C                 | MCK1          |
| YPR030W                                          | CSR2          | YER139C                 | YER139C       |
| YKL139W                                          | CTK1          | YJR140C                 | HIR3          |
| YBR171W                                          | SEC66         | YML071C                 | COG8          |
| YPR052C                                          | NHP6A         | YBR215W                 | HPC2          |
| YPL057C                                          | SUR1          | YLR371W                 | ROM2          |
| YER162C                                          | RAD4          | YMR152W                 | YIM1          |
| YLR385C                                          | SWC7          | YLR399C                 | BDF1          |
| YNL215W                                          | IES2          | YBR036C                 | CSG2          |
| YHR060W                                          | VMA22         | YKL041W                 | VPS24         |
| YOR076C                                          | SKI7          | YPR189W                 | SKI3          |
| YIR005W                                          | IST3          | YNL116W                 | DMA2          |
| YKL048C                                          | ELM1          | YGL115W                 | SNF4          |
| YBR107C                                          | IML3          | YEL053C                 | MAK10         |
| YDL160C                                          | DHH1          | YJR090C                 | GRR1          |
| YKR061W                                          | KTR2          | YDR335W                 | MSN5          |
| YJL172W                                          | CPS1          | YLR180W                 | SAM1          |
| YBR019C                                          | GAL10         | YLR370C                 | ARC18         |
| YNL079C                                          | TPM1          | YLR371W                 | ROM2          |

| Predictions at threshold level 0.75 continued... |               |                         |               |
|--------------------------------------------------|---------------|-------------------------|---------------|
| Gene1 of predicted pair                          |               | Gene2 of predicted pair |               |
| Systematic Name                                  | Standard Name | Systematic Name         | Standard Name |
| YBR200W                                          | BEM1          | YCR086W                 | CSM1          |
| YEL065W                                          | SIT1          | YOL081W                 | IRA2          |
| YDR484W                                          | VPS52         | YKL048C                 | ELM1          |
| YCR020C-A                                        | MAK31         | YDL006W                 | PTC1          |
| YGL133W                                          | ITC1          | YGR135W                 | PRE9          |
| YOR375C                                          | GDH1          | YDR440W                 | DOT1          |
| YKL160W                                          | ELF1          | YLR182W                 | SWI6          |
| YLR337C                                          | VRP1          | YOL067C                 | RTG1          |
| YPR051W                                          | MAK3          | YHL002W                 | HSE1          |
| YDR289C                                          | RTT103        | YLR350W                 | ORM2          |
| YCR092C                                          | MSH3          | YOL090W                 | MSH2          |
| YKL006W                                          | RPL14A        | YGR135W                 | PRE9          |
| YGL212W                                          | VAM7          | YKR048C                 | NAP1          |
| YKL139W                                          | CTK1          | YOR270C                 | VPH1          |
| YJR060W                                          | CBF1          | YLR309C                 | IMH1          |
| YMR055C                                          | BUB2          | YDR260C                 | SWM1          |
| YOR275C                                          | RIM20         | YBL087C                 | RPL23A        |
| YBR126C                                          | TPS1          | YMR224C                 | MRE11         |
| YGL003C                                          | CDH1          | YDL047W                 | SIT4          |
| YPL105C                                          | YPL105C       | YPL120W                 | VPS30         |
| YLR234W                                          | TOP3          | YBR057C                 | MUM2          |
| YNL243W                                          | SLA2          | YLR337C                 | VRP1          |
| YML115C                                          | VAN1          | YOR275C                 | RIM20         |
| YDR363W-A                                        | SEM1          | YLR421C                 | RPN13         |
| YDR358W                                          | GGA1          | YMR311C                 | GLC8          |
| YDR507C                                          | GIN4          | YHR061C                 | GIC1          |
| YKL025C                                          | PAN3          | YGL253W                 | HXK2          |
| YPR018W                                          | RLF2          | YDL059C                 | RAD59         |
| YOR290C                                          | SNF2          | YKL160W                 | ELF1          |

| Predictions at threshold level 0.75 continued... |               |                         |               |
|--------------------------------------------------|---------------|-------------------------|---------------|
| Gene1 of predicted pair                          |               | Gene2 of predicted pair |               |
| Systematic Name                                  | Standard Name | Systematic Name         | Standard Name |
| YMR273C                                          | ZDS1          | YKR024C                 | DBP7          |
| YMR004W                                          | MVP1          | YNL107W                 | YAF9          |
| YDR477W                                          | SNF1          | YOL081W                 | IRA2          |
| YMR080C                                          | NAM7          | YHR134W                 | WSS1          |
| YLR452C                                          | SST2          | YJR084W                 | CSN12         |
| YML013W                                          | UBX2          | YMR055C                 | BUB2          |
| YOR358W                                          | HAP5          | YBL079W                 | NUP170        |
| YNL199C                                          | GCR2          | YNL107W                 | YAF9          |
| YPL161C                                          | BEM4          | YHR061C                 | GIC1          |
| YKL139W                                          | CTK1          | YDR254W                 | CHL4          |
| YOL111C                                          | MDY2          | YER040W                 | GLN3          |
| YDR320C                                          | SWA2          | YDR310C                 | SUM1          |
| YPL022W                                          | RAD1          | YNL016W                 | PUB1          |
| YJL176C                                          | SWI3          | YGL153W                 | PEX14         |
| YBR171W                                          | SEC66         | YHR111W                 | UBA4          |
| YDR320C                                          | SWA2          | YMR004W                 | MVP1          |
| YFR010W                                          | UBP6          | YPL195W                 | APL5          |
| YML001W                                          | YPT7          | YLR093C                 | NYV1          |
| YKL116C                                          | PRR1          | YPR030W                 | CSR2          |
| YGL078C                                          | DBP3          | YMR153W                 | NUP53         |
| YKR099W                                          | BAS1          | YHR039C-A               | VMA10         |
| YBR073W                                          | RDH54         | YPL018W                 | CTF19         |
| YKR001C                                          | VPS1          | YOR312C                 | RPL20B        |
| YHR060W                                          | VMA22         | YPR046W                 | MCM16         |
| YKL006W                                          | RPL14A        | YPL161C                 | BEM4          |
| YOR127W                                          | RGA1          | YHR060W                 | VMA22         |
| YGL174W                                          | BUD13         | YOR043W                 | WHI2          |
| YPL259C                                          | APM1          | YOR327C                 | SNC2          |
| YHR098C                                          | SFB3          | YPR135W                 | CTF4          |

| Predictions at threshold level 0.75 continued... |               |                         |               |
|--------------------------------------------------|---------------|-------------------------|---------------|
| Gene1 of predicted pair                          |               | Gene2 of predicted pair |               |
| Systematic Name                                  | Standard Name | Systematic Name         | Standard Name |
| YNL058C                                          | YNL058C       | YHR081W                 | LRP1          |
| YGL038C                                          | OCH1          | YMR052W                 | FAR3          |
| YPL086C                                          | ELP3          | YBR111W-A               | SUS1          |
| YDL020C                                          | RPN4          | YHR039C-A               | VMA10         |
| YPL240C                                          | HSP82         | YDL246C                 | SOR2          |
| YMR202W                                          | ERG2          | YJL187C                 | SWE1          |
| YIL034C                                          | CAP2          | YPR046W                 | MCM16         |
| YGL078C                                          | DBP3          | YMR016C                 | SOK2          |
| YMR038C                                          | CCS1          | YER122C                 | GLO3          |
| YKL139W                                          | CTK1          | YMR038C                 | CCS1          |
| YNL199C                                          | GCR2          | YDR289C                 | RTT103        |
| YLR429W                                          | CRN1          | YOR141C                 | ARP8          |
| YEL044W                                          | IES6          | YOR035C                 | SHE4          |
| YIL103W                                          | DPH1          | YOL081W                 | IRA2          |
| YEL005C                                          | VAB2          | YHR195W                 | NVJ1          |
| YDL113C                                          | ATG20         | YDR142C                 | PEX7          |
| YKR099W                                          | BAS1          | YMR152W                 | YIM1          |
| YHL031C                                          | GOS1          | YGL212W                 | VAM7          |
| YOR106W                                          | VAM3          | YKR020W                 | VPS51         |
| YLR083C                                          | EMP70         | YNL107W                 | YAF9          |
| YDR202C                                          | RAV2          | YHR060W                 | VMA22         |
| YOR023C                                          | AHC1          | YHR111W                 | UBA4          |
| YLR360W                                          | VPS38         | YCR086W                 | CSM1          |
| YJR060W                                          | CBF1          | YEL051W                 | VMA8          |
| YPL119C                                          | DBP1          | YPR119W                 | CLB2          |
| YLR423C                                          | ATG17         | YNL090W                 | RHO2          |
| YIL133C                                          | RPL16A        | YGL252C                 | RTG2          |
| YMR198W                                          | CIK1          | YPL018W                 | CTF19         |
| YGR252W                                          | GCN5          | YGL252C                 | RTG2          |

| Predictions at threshold level 0.75 continued... |               |                         |               |
|--------------------------------------------------|---------------|-------------------------|---------------|
| Gene1 of predicted pair                          |               | Gene2 of predicted pair |               |
| Systematic Name                                  | Standard Name | Systematic Name         | Standard Name |
| YHR200W                                          | RPN10         | YML097C                 | VPS9          |
| YPL024W                                          | RMI1          | YDL192W                 | ARF1          |
| YMR142C                                          | RPL13B        | YPL137C                 | GIP3          |
| YGL174W                                          | BUD13         | YDL002C                 | NHP10         |
| YIL034C                                          | CAP2          | YOL067C                 | RTG1          |
| YOR109W                                          | INP53         | YPL105C                 | YPL105C       |
| YDR507C                                          | GIN4          | YJL187C                 | SWE1          |
| YML016C                                          | PPZ1          | YLR425W                 | TUS1          |
| YOL145C                                          | CTR9          | YJL140W                 | RPB4          |
| YJL154C                                          | VPS35         | YDR080W                 | VPS41         |
| YBR200W                                          | BEM1          | YKL080W                 | VMA5          |
| YBR017C                                          | KAP104        | YGL100W                 | SEH1          |
| YDR103W                                          | STE5          | YOR212W                 | STE4          |
| YDR363W-A                                        | SEM1          | YGL163C                 | RAD54         |
| YPL037C                                          | EGD1          | YNL041C                 | COG6          |
| YPL024W                                          | RMI1          | YFL023W                 | BUD27         |
| YMR152W                                          | YIM1          | YJR084W                 | CSN12         |
| YLR094C                                          | GIS3          | YPL195W                 | APL5          |
| YIL008W                                          | URM1          | YGL253W                 | HXK2          |
| YJR043C                                          | POL32         | YGL100W                 | SEH1          |
| YDR137W                                          | RGP1          | YGL025C                 | PGD1          |
| YLR386W                                          | VAC14         | YBL087C                 | RPL23A        |
| YMR055C                                          | BUB2          | YGR054W                 | YGR054W       |
| YJL117W                                          | PHO86         | YLR371W                 | ROM2          |
| YLR083C                                          | EMP70         | YGR261C                 | APL6          |
| YBR200W                                          | BEM1          | YDL047W                 | SIT4          |
| YDR192C                                          | NUP42         | YGR081C                 | SLX9          |
| YIL034C                                          | CAP2          | YOR132W                 | VPS17         |
| YFR032C-A                                        | RPL29         | YKL048C                 | ELM1          |

| Predictions at threshold level 0.75 continued... |               |                         |               |
|--------------------------------------------------|---------------|-------------------------|---------------|
| Gene1 of predicted pair                          |               | Gene2 of predicted pair |               |
| Systematic Name                                  | Standard Name | Systematic Name         | Standard Name |
| YLR371W                                          | ROM2          | YLR093C                 | NYV1          |
| YBR084C-A                                        | RPL19A        | YHR152W                 | SPO12         |
| YBR030W                                          | YBR030W       | YLR398C                 | SKI2          |
| YGR249W                                          | MGA1          | YGL003C                 | CDH1          |
| YGL066W                                          | SGF73         | YGR135W                 | PRE9          |
| YER107C                                          | GLE2          | YML041C                 | VPS71         |
| YLR119W                                          | SRN2          | YLR371W                 | ROM2          |
| YMR224C                                          | MRE11         | YLR032W                 | RAD5          |
| YJL124C                                          | LSM1          | YFR036W                 | CDC26         |
| YNR072W                                          | HXT17         | YFR036W                 | CDC26         |
| YNL068C                                          | FKH2          | YKR057W                 | RPS21A        |
| YPR141C                                          | KAR3          | YGL190C                 | CDC55         |
| YCR081W                                          | SRB8          | YLR425W                 | TUS1          |
| YLR360W                                          | VPS38         | YJL029C                 | VPS53         |
| YGR217W                                          | CCH1          | YMR205C                 | PFK2          |
| YBR031W                                          | RPL4A         | YER102W                 | RPS8B         |
| YHR156C                                          | LIN1          | YNL058C                 | YNL058C       |
| YLR234W                                          | TOP3          | YHR013C                 | ARD1          |
| YLR410W                                          | VIP1          | YHR108W                 | GGA2          |
| YLR240W                                          | VPS34         | YJL029C                 | VPS53         |
| YBR171W                                          | SEC66         | YDL056W                 | MBP1          |
| YAL024C                                          | LTE1          | YHL022C                 | SPO11         |
| YDR335W                                          | MSN5          | YIL103W                 | DPH1          |
| YNL069C                                          | RPL16B        | YER162C                 | RAD4          |
| YBL058W                                          | SHP1          | YNL058C                 | YNL058C       |
| YNL325C                                          | FIG4          | YOR327C                 | SNC2          |
| YDR383C                                          | NKP1          | YLR381W                 | CTF3          |
| YLR079W                                          | SIC1          | YDR378C                 | LSM6          |
| YHR060W                                          | VMA22         | YGL115W                 | SNF4          |

| Predictions at threshold level 0.75 continued... |               |                         |               |
|--------------------------------------------------|---------------|-------------------------|---------------|
| Gene1 of predicted pair                          |               | Gene2 of predicted pair |               |
| Systematic Name                                  | Standard Name | Systematic Name         | Standard Name |
| YPL042C                                          | SSN3          | YBR215W                 | HPC2          |
| YER116C                                          | SLX8          | YEL060C                 | PRB1          |
| YJL187C                                          | SWE1          | YML028W                 | TSA1          |
| YDL065C                                          | PEX19         | YGL205W                 | POX1          |
| YNL307C                                          | MCK1          | YGL124C                 | MON1          |
| YDR261C                                          | EXG2          | YBR280C                 | SAF1          |
| YPL152W                                          | RRD2          | YDR318W                 | MCM21         |
| YGR217W                                          | CCH1          | YPL089C                 | RLM1          |
| YBR107C                                          | IML3          | YDR155C                 | CPR1          |
| YLR386W                                          | VAC14         | YHR013C                 | ARD1          |
| YLR090W                                          | XDJ1          | YMR214W                 | SCJ1          |
| YER110C                                          | KAP123        | YGR059W                 | SPR3          |
| YMR025W                                          | CSI1          | YJR084W                 | CSN12         |
| YLR313C                                          | SPH1          | YLR410W                 | VIP1          |
| YKR001C                                          | VPS1          | YER162C                 | RAD4          |
| YDR477W                                          | SNF1          | YPR046W                 | MCM16         |
| YDR176W                                          | NGG1          | YBR089C-A               | NHP6B         |
| YPL037C                                          | EGD1          | YFR036W                 | CDC26         |
| YLR337C                                          | VRP1          | YDR183W                 | PLP1          |
| YDR245W                                          | MNN10         | YCR077C                 | PAT1          |
| YPL213W                                          | LEA1          | YCR077C                 | PAT1          |
| YHL031C                                          | GOS1          | YMR004W                 | MVP1          |
| YNR072W                                          | HXT17         | YNL238W                 | KEX2          |
| YDR477W                                          | SNF1          | YMR153W                 | NUP53         |
| YHR012W                                          | VPS29         | YAR014C                 | BUD14         |
| YIL076W                                          | SEC28         | YMR004W                 | MVP1          |
| YBL071W-A                                        | KTI11         | YPL101W                 | ELP4          |
| YGR270W                                          | YTA7          | YGL252C                 | RTG2          |
| YMR055C                                          | BUB2          | YHR013C                 | ARD1          |

| Predictions at threshold level 0.75 continued... |               |                         |               |
|--------------------------------------------------|---------------|-------------------------|---------------|
| Gene1 of predicted pair                          |               | Gene2 of predicted pair |               |
| Systematic Name                                  | Standard Name | Systematic Name         | Standard Name |
| YGR135W                                          | PRE9          | YPL256C                 | CLN2          |
| YMR026C                                          | PEX12         | YIL076W                 | SEC28         |
| YOL051W                                          | GAL11         | YLR357W                 | RSC2          |
| YGR019W                                          | UGA1          | YBL051C                 | PIN4          |
| YLR410W                                          | VIP1          | YAR014C                 | BUD14         |
| YLR399C                                          | BDF1          | YFR034C                 | PHO4          |
| YBL047C                                          | EDE1          | YKL048C                 | ELM1          |
| YDR382W                                          | RPP2B         | YNL147W                 | LSM7          |
| YML115C                                          | VAN1          | YMR199W                 | CLN1          |
| YIR003W                                          | YIR003W       | YPL050C                 | MNN9          |
| YHR081W                                          | LRP1          | YER040W                 | GLN3          |
| YDL226C                                          | GCS1          | YOR036W                 | PEP12         |
| YFR031C-A                                        | RPL2A         | YNL107W                 | YAF9          |
| YKL068W                                          | NUP100        | YJR090C                 | GRR1          |
| YJR090C                                          | GRR1          | YNL107W                 | YAF9          |
| YDR254W                                          | CHL4          | YJR035W                 | RAD26         |
| YOR039W                                          | CKB2          | YJL187C                 | SWE1          |
| YPR029C                                          | APL4          | YKR001C                 | VPS1          |
| YER116C                                          | SLX8          | YOR066W                 | MSA1          |
| YBR107C                                          | IML3          | YDR310C                 | SUM1          |
| YPR036W                                          | VMA13         | YNL076W                 | MKS1          |
| YIL053W                                          | RHR2          | YGR249W                 | MGA1          |
| YGL078C                                          | DBP3          | YDR207C                 | UME6          |
| YMR116C                                          | ASC1          | YKL139W                 | CTK1          |
| YDR156W                                          | RPA14         | YHR200W                 | RPN10         |
| YDR137W                                          | RGP1          | YOL018C                 | TLG2          |
| YOR106W                                          | VAM3          | YML071C                 | COG8          |
| YMR109W                                          | MYO5          | YDR289C                 | RTT103        |
| YAL024C                                          | LTE1          | YDL083C                 | RPS16B        |



| Predictions at threshold level 0.75 continued... |               |                         |               |
|--------------------------------------------------|---------------|-------------------------|---------------|
| Gene1 of predicted pair                          |               | Gene2 of predicted pair |               |
| Systematic Name                                  | Standard Name | Systematic Name         | Standard Name |
| YNL032W                                          | SIW14         | YOR270C                 | VPH1          |
| YBR194W                                          | SOY1          | YER122C                 | GLO3          |
| YOR230W                                          | WTM1          | YOR229W                 | WTM2          |
| YPR046W                                          | MCM16         | YNL076W                 | MKS1          |
| YBL102W                                          | SFT2          | YMR004W                 | MVP1          |
| YGR173W                                          | RBG2          | YDR152W                 | GIR2          |
| YLR381W                                          | CTF3          | YGR054W                 | YGR054W       |
| YNL238W                                          | KEX2          | YMR311C                 | GLC8          |
| YNL069C                                          | RPL16B        | YCL001W                 | RER1          |
| YDR245W                                          | MNN10         | YOR124C                 | UBP2          |
| YLR288C                                          | MEC3          | YHR010W                 | RPL27A        |
| YHR200W                                          | RPN10         | YEL060C                 | PRB1          |
| YJL172W                                          | CPS1          | YCR053W                 | THR4          |
| YML115C                                          | VAN1          | YMR153W                 | NUP53         |
| YLL007C                                          | YLL007C       | YGL253W                 | HXK2          |
| YPL022W                                          | RAD1          | YPL256C                 | CLN2          |
| YCL001W                                          | RER1          | YPL234C                 | TFP3          |
| YIL053W                                          | RHR2          | YBR126C                 | TPS1          |
| YML117W                                          | NAB6          | YGR135W                 | PRE9          |
| YKR099W                                          | BAS1          | YLR094C                 | GIS3          |
| YNL079C                                          | TPM1          | YDR440W                 | DOT1          |
| YJL172W                                          | CPS1          | YFL023W                 | BUD27         |
| YDR137W                                          | RGP1          | YLR371W                 | ROM2          |
| YGL212W                                          | VAM7          | YDR207C                 | UME6          |
| YBR290W                                          | BSD2          | YCR086W                 | CSM1          |
| YOR109W                                          | INP53         | YNL238W                 | KEX2          |
| YLL039C                                          | UBI4          | YBL072C                 | RPS8A         |
| YBL058W                                          | SHP1          | YLR386W                 | VAC14         |
| YBR274W                                          | CHK1          | YKL114C                 | APN1          |

| Predictions at threshold level 0.75 continued... |               |                         |               |
|--------------------------------------------------|---------------|-------------------------|---------------|
| Gene1 of predicted pair                          |               | Gene2 of predicted pair |               |
| Systematic Name                                  | Standard Name | Systematic Name         | Standard Name |
| YJR035W                                          | RAD26         | YKL054C                 | DEF1          |
| YGL212W                                          | VAM7          | YGL095C                 | VPS45         |
| YPL213W                                          | LEA1          | YLR425W                 | TUS1          |
| YNL041C                                          | COG6          | YDR358W                 | GGA1          |
| YMR026C                                          | PEX12         | YGL124C                 | MON1          |
| YEL050C                                          | RML2          | YJR135C                 | MCM22         |
| YKL139W                                          | CTK1          | YDL077C                 | VAM6          |
| YPR120C                                          | CLB5          | YCR077C                 | PAT1          |
| YKL139W                                          | CTK1          | YGL252C                 | RTG2          |
| YLR090W                                          | XDJ1          | YER040W                 | GLN3          |
| YEL053C                                          | MAK10         | YBR019C                 | GAL10         |
| YGR072W                                          | UPF3          | YDL006W                 | PTC1          |
| YER116C                                          | SLX8          | YEL053C                 | MAK10         |
| YBL103C                                          | RTG3          | YDL192W                 | ARF1          |
| YBL008W                                          | HIR1          | YLR350W                 | ORM2          |
| YEL013W                                          | VAC8          | YPR185W                 | ATG13         |
| YLR320W                                          | MMS22         | YDL006W                 | PTC1          |
| YLR386W                                          | VAC14         | YPL253C                 | VIK1          |
| YNL058C                                          | YNL058C       | YDL077C                 | VAM6          |
| YDR477W                                          | SNF1          | YBL103C                 | RTG3          |
| YHR039C-A                                        | VMA10         | YOR066W                 | MSA1          |
| YHR167W                                          | THP2          | YLR350W                 | ORM2          |
| YNL215W                                          | IES2          | YFR030W                 | MET10         |
| YOL044W                                          | PEX15         | YNL214W                 | PEX17         |
| YBR200W                                          | BEM1          | YML112W                 | CTK3          |
| YGL163C                                          | RAD54         | YIR005W                 | IST3          |
| YFR010W                                          | UBP6          | YKL139W                 | CTK1          |
| YDR477W                                          | SNF1          | YMR152W                 | YIM1          |
| YBR108W                                          | YBR108W       | YBL103C                 | RTG3          |

| Predictions at threshold level 0.75 continued... |               |                         |               |
|--------------------------------------------------|---------------|-------------------------|---------------|
| Gene1 of predicted pair                          |               | Gene2 of predicted pair |               |
| Systematic Name                                  | Standard Name | Systematic Name         | Standard Name |
| YPR036W                                          | VMA13         | YER005W                 | YND1          |
| YDR293C                                          | SSD1          | YEL056W                 | HAT2          |
| YGR270W                                          | YTA7          | YOL054W                 | PSH1          |
| YCR066W                                          | RAD18         | YHL020C                 | OPI1          |
| YMR109W                                          | MYO5          | YDR155C                 | CPR1          |
| YPL057C                                          | SUR1          | YNL076W                 | MKS1          |
| YOR080W                                          | DIA2          | YPR119W                 | CLB2          |
| YMR142C                                          | RPL13B        | YOR270C                 | VPH1          |
| YBR215W                                          | HPC2          | YOL081W                 | IRA2          |
| YBL021C                                          | HAP3          | YDR310C                 | SUM1          |
| YMR199W                                          | CLN1          | YDR379W                 | RGA2          |
| YGR081C                                          | SLX9          | YBR215W                 | HPC2          |
| YBR030W                                          | YBR030W       | YNL238W                 | KEX2          |
| YGL025C                                          | PGD1          | YML001W                 | YPT7          |
| YML016C                                          | PPZ1          | YGL003C                 | CDH1          |
| YLR447C                                          | VMA6          | YAL002W                 | VPS8          |
| YOR106W                                          | VAM3          | YDR469W                 | SDC1          |
| YBR215W                                          | HPC2          | YDR171W                 | HSP42         |
| YAL024C                                          | LTE1          | YMR198W                 | CIK1          |
| YJL004C                                          | SYS1          | YJR033C                 | RAV1          |
| YCR088W                                          | ABP1          | YKL213C                 | DOA1          |
| YDR484W                                          | VPS52         | YJL029C                 | VPS53         |
| YNL206C                                          | RTT106        | YBR107C                 | IML3          |
| YOR096W                                          | RPS7A         | YLR441C                 | RPS1A         |
| YPL050C                                          | MNN9          | YPL112C                 | PEX25         |
| YLL007C                                          | YLL007C       | YHR111W                 | UBA4          |
| YNL025C                                          | SSN8          | YKL139W                 | CTK1          |
| YKR101W                                          | SIR1          | YBR010W                 | HHT1          |
| YDR129C                                          | SAC6          | YJR084W                 | CSN12         |

| Predictions at threshold level 0.75 continued... |               |                         |               |
|--------------------------------------------------|---------------|-------------------------|---------------|
| Gene1 of predicted pair                          |               | Gene2 of predicted pair |               |
| Systematic Name                                  | Standard Name | Systematic Name         | Standard Name |
| YNL069C                                          | RPL16B        | YLR309C                 | IMH1          |
| YJL154C                                          | VPS35         | YOR014W                 | RTS1          |
| YML016C                                          | PPZ1          | YDR183W                 | PLP1          |
| YOR337W                                          | TEA1          | YPL037C                 | EGD1          |
| YFL047W                                          | RGD2          | YGL016W                 | KAP122        |
| YFR036W                                          | CDC26         | YOR368W                 | RAD17         |
| YHR013C                                          | ARD1          | YDR289C                 | RTT103        |
| YNL058C                                          | YNL058C       | YPR046W                 | MCM16         |
| YBR057C                                          | MUM2          | YGR135W                 | PRE9          |
| YPL037C                                          | EGD1          | YHR012W                 | VPS29         |
| YHR134W                                          | WSS1          | YOR023C                 | AHC1          |
| YLR083C                                          | EMP70         | YHR060W                 | VMA22         |
| YDR363W-A                                        | SEM1          | YPL161C                 | BEM4          |
| YNL297C                                          | MON2          | YHL020C                 | OPI1          |
| YDR156W                                          | RPA14         | YPL018W                 | CTF19         |
| YPL057C                                          | SUR1          | YEL053C                 | MAK10         |
| YML038C                                          | YMD8          | YER120W                 | SCS2          |
| YLR109W                                          | AHP1          | YOL151W                 | GRE2          |
| YGR270W                                          | YTA7          | YDR310C                 | SUM1          |
| YLR447C                                          | VMA6          | YOL067C                 | RTG1          |
| YDR225W                                          | HTA1          | YLR234W                 | TOP3          |
| YGL237C                                          | HAP2          | YNL107W                 | YAF9          |
| YKR099W                                          | BAS1          | YMR214W                 | SCJ1          |
| YOR083W                                          | WHI5          | YBR194W                 | SOY1          |
| YGR261C                                          | APL6          | YDL006W                 | PTC1          |
| YEL051W                                          | VMA8          | YNL107W                 | YAF9          |
| YBR084C-A                                        | RPL19A        | YHR111W                 | UBA4          |
| YHR200W                                          | RPN10         | YDL047W                 | SIT4          |
| YER144C                                          | UBP5          | YDL077C                 | VAM6          |

| Predictions at threshold level 0.75 continued... |               |                         |               |
|--------------------------------------------------|---------------|-------------------------|---------------|
| Gene1 of predicted pair                          |               | Gene2 of predicted pair |               |
| Systematic Name                                  | Standard Name | Systematic Name         | Standard Name |
| YGR159C                                          | NSR1          | YLR410W                 | VIP1          |
| YFR010W                                          | UBP6          | YDR484W                 | VPS52         |
| YCL037C                                          | SRO9          | YML038C                 | YMD8          |
| YML016C                                          | PPZ1          | YPR120C                 | CLB5          |
| YPL042C                                          | SSN3          | YKL160W                 | ELF1          |
| YGR108W                                          | CLB1          | YDR289C                 | RTT103        |
| YLR148W                                          | PEP3          | YMR231W                 | PEP5          |
| YNL041C                                          | COG6          | YER040W                 | GLN3          |
| YCL010C                                          | SGF29         | YDR216W                 | ADR1          |
| YMR224C                                          | MRE11         | YLR182W                 | SWI6          |
| YNL127W                                          | FAR11         | YAL002W                 | VPS8          |
| YCR086W                                          | CSM1          | YDR183W                 | PLP1          |
| YJL053W                                          | PEP8          | YHR161C                 | YAP1801       |
| YNL032W                                          | SIW14         | YLR180W                 | SAM1          |
| YGR020C                                          | VMA7          | YER122C                 | GLO3          |
| YPR030W                                          | CSR2          | YCR053W                 | THR4          |
| YNL106C                                          | INP52         | YHR111W                 | UBA4          |
| YLR447C                                          | VMA6          | YKL080W                 | VMA5          |
| YOR132W                                          | VPS17         | YNL127W                 | FAR11         |
| YOR337W                                          | TEA1          | YKL126W                 | YPK1          |
| YDR378C                                          | LSM6          | YOL091W                 | SPO21         |
| YHR111W                                          | UBA4          | YBL087C                 | RPL23A        |
| YMR224C                                          | MRE11         | YPL195W                 | APL5          |
| YGL078C                                          | DBP3          | YLR452C                 | SST2          |
| YNL076W                                          | MKS1          | YDR310C                 | SUM1          |
| YNL032W                                          | SIW14         | YNL041C                 | COG6          |
| YIR025W                                          | MND2          | YFR036W                 | CDC26         |
| YAL024C                                          | LTE1          | YBR278W                 | DPB3          |
| YHR156C                                          | LIN1          | YER116C                 | SLX8          |

| Predictions at threshold level 0.75 continued... |               |                         |               |
|--------------------------------------------------|---------------|-------------------------|---------------|
| Gene1 of predicted pair                          |               | Gene2 of predicted pair |               |
| Systematic Name                                  | Standard Name | Systematic Name         | Standard Name |
| YDL006W                                          | PTC1          | YPL089C                 | RLM1          |
| YOR195W                                          | SLK19         | YOR127W                 | RGA1          |
| YGL006W                                          | PMC1          | YBL078C                 | ATG8          |
| YNL041C                                          | COG6          | YEL036C                 | ANP1          |
| YDR176W                                          | NGG1          | YCL010C                 | SGF29         |
| YIL159W                                          | BNR1          | YLR425W                 | TUS1          |
| YGL250W                                          | RMR1          | YKL101W                 | HSL1          |
| YKR095W                                          | MLP1          | YBL079W                 | NUP170        |
| YNL325C                                          | FIG4          | YKL126W                 | YPK1          |
| YNL058C                                          | YNL058C       | YNL238W                 | KEX2          |
| YER144C                                          | UBP5          | YPL161C                 | BEM4          |
| YDR310C                                          | SUM1          | YOR014W                 | RTS1          |
| YDR004W                                          | RAD57         | YKR072C                 | SIS2          |
| YDR484W                                          | VPS52         | YNL058C                 | YNL058C       |
| YMR199W                                          | CLN1          | YDR076W                 | RAD55         |
| YGL178W                                          | MPT5          | YPL101W                 | ELP4          |
| YLR396C                                          | VPS33         | YAL002W                 | VPS8          |
| YDR484W                                          | VPS52         | YLR370C                 | ARC18         |
| YNL291C                                          | MID1          | YMR038C                 | CCS1          |
| YGL066W                                          | SGF73         | YPL248C                 | GAL4          |
| YNL117W                                          | MLS1          | YLR032W                 | RAD5          |
| YGR108W                                          | CLB1          | YBR200W                 | BEM1          |
| YER116C                                          | SLX8          | YLR370C                 | ARC18         |
| YLR170C                                          | APS1          | YOR132W                 | VPS17         |
| YBR194W                                          | SOY1          | YOR124C                 | UBP2          |
| YLR119W                                          | SRN2          | YDL083C                 | RPS16B        |
| YMR026C                                          | PEX12         | YKL048C                 | ELM1          |
| YMR216C                                          | SKY1          | YCR066W                 | RAD18         |
| YDL155W                                          | CLB3          | YGL253W                 | HXK2          |

| Predictions at threshold level 0.75 continued... |               |                         |               |
|--------------------------------------------------|---------------|-------------------------|---------------|
| Gene1 of predicted pair                          |               | Gene2 of predicted pair |               |
| Systematic Name                                  | Standard Name | Systematic Name         | Standard Name |
| YPR017C                                          | DSS4          | YOR112W                 | CEX1          |
| YMR284W                                          | YKU70         | YLR135W                 | SLX4          |
| YML038C                                          | YMD8          | YML001W                 | YPT7          |
| YGL100W                                          | SEH1          | YKR082W                 | NUP133        |
| YPL256C                                          | CLN2          | YLR425W                 | TUS1          |
| YHR157W                                          | REC104        | YER044C-A               | MEI4          |
| YBR290W                                          | BSD2          | YOR358W                 | HAP5          |
| YLR043C                                          | TRX1          | YDR080W                 | VPS41         |
| YOR270C                                          | VPH1          | YHR200W                 | RPN10         |
| YPL037C                                          | EGD1          | YEL060C                 | PRB1          |
| YNR052C                                          | POP2          | YBR089C-A               | NHP6B         |
| YCR086W                                          | CSM1          | YHR114W                 | BZZ1          |
| YPL018W                                          | CTF19         | YGL151W                 | NUT1          |
| YJL154C                                          | VPS35         | YER122C                 | GLO3          |
| YHR205W                                          | SCH9          | YPL253C                 | VIK1          |
| YGR270W                                          | YTA7          | YGR054W                 | YGR054W       |
| YNL106C                                          | INP52         | YOR195W                 | SLK19         |
| YPL253C                                          | VIK1          | YHR200W                 | RPN10         |
| YDR146C                                          | SWI5          | YBL047C                 | EDE1          |
| YDL083C                                          | RPS16B        | YML071C                 | COG8          |
| YBR200W                                          | BEM1          | YJR035W                 | RAD26         |
| YFR031C-A                                        | RPL2A         | YMR230W                 | RPS10B        |
| YDL239C                                          | ADY3          | YNL225C                 | CNM67         |
| YBR200W                                          | BEM1          | YER040W                 | GLN3          |
| YMR224C                                          | MRE11         | YMR142C                 | RPL13B        |
| YBR278W                                          | DPB3          | YOR043W                 | WHI2          |
| YJL029C                                          | VPS53         | YER143W                 | DDI1          |
| YGL066W                                          | SGF73         | YKL160W                 | ELF1          |
| YML115C                                          | VAN1          | YLR398C                 | SKI2          |

| Predictions at threshold level 0.75 continued... |               |                         |               |
|--------------------------------------------------|---------------|-------------------------|---------------|
| Gene1 of predicted pair                          |               | Gene2 of predicted pair |               |
| Systematic Name                                  | Standard Name | Systematic Name         | Standard Name |
| YGR089W                                          | NNF2          | YHL010C                 | YHL010C       |
| YNL264C                                          | PDR17         | YLR398C                 | SKI2          |
| YHR156C                                          | LIN1          | YGL025C                 | PGD1          |
| YGL025C                                          | PGD1          | YLR398C                 | SKI2          |
| YHR073W                                          | OSH3          | YOL126C                 | MDH2          |
| YBR108W                                          | YBR108W       | YLR452C                 | SST2          |
| YIL159W                                          | BNR1          | YPL161C                 | BEM4          |
| YLR095C                                          | IOC2          | YLR119W                 | SRN2          |
| YML062C                                          | MFT1          | YNL004W                 | HRB1          |
| YHR200W                                          | RPN10         | YPL256C                 | CLN2          |
| YGR261C                                          | APL6          | YGL115W                 | SNF4          |
| YML095C                                          | RAD10         | YGL163C                 | RAD54         |
| YOR014W                                          | RTS1          | YLR425W                 | TUS1          |
| YOR270C                                          | VPH1          | YNL041C                 | COG6          |
| YML016C                                          | PPZ1          | YFR030W                 | MET10         |
| YOR035C                                          | SHE4          | YML097C                 | VPS9          |
| YDR443C                                          | SSN2          | YLR192C                 | HCR1          |
| YBR215W                                          | HPC2          | YBR107C                 | IML3          |
| YDL127W                                          | PCL2          | YEL056W                 | HAT2          |
| YNL297C                                          | MON2          | YAR014C                 | BUD14         |
| YBR215W                                          | HPC2          | YDR378C                 | LSM6          |
| YGL066W                                          | SGF73         | YPR120C                 | CLB5          |
| YPR046W                                          | MCM16         | YOL091W                 | SPO21         |
| YDL160C                                          | DHH1          | YMR125W                 | STO1          |
| YAL024C                                          | LTE1          | YCR086W                 | CSM1          |
| YOR212W                                          | STE4          | YCL032W                 | STE50         |
| YER144C                                          | UBP5          | YDL192W                 | ARF1          |
| YIL076W                                          | SEC28         | YAL002W                 | VPS8          |
| YLR447C                                          | VMA6          | YKL041W                 | VPS24         |



| Predictions at threshold level 0.75 continued... |               |                         |               |
|--------------------------------------------------|---------------|-------------------------|---------------|
| Gene1 of predicted pair                          |               | Gene2 of predicted pair |               |
| Systematic Name                                  | Standard Name | Systematic Name         | Standard Name |
| YER107C                                          | GLE2          | YBR231C                 | SWC5          |
| YNL068C                                          | FKH2          | YLR386W                 | VAC14         |
| YKL110C                                          | KTI12         | YLR254C                 | NDL1          |
| YGR020C                                          | VMA7          | YHL020C                 | OPI1          |
| YNL218W                                          | MGS1          | YLR234W                 | TOP3          |
| YDR129C                                          | SAC6          | YHR013C                 | ARD1          |
| YDR484W                                          | VPS52         | YDR137W                 | RGP1          |
| YOR043W                                          | WHI2          | YLR425W                 | TUS1          |
| YML117W                                          | NAB6          | YJL095W                 | BCK1          |
| YHR060W                                          | VMA22         | YHR039C-A               | VMA10         |
| YGR104C                                          | SRB5          | YER161C                 | SPT2          |
| YPL096C-A                                        | ERI1          | YJL148W                 | RPA34         |
| YLR399C                                          | BDF1          | YHR013C                 | ARD1          |
| YBR200W                                          | BEM1          | YNL225C                 | CNM67         |
| YDR484W                                          | VPS52         | YMR152W                 | YIM1          |
| YKR020W                                          | VPS51         | YDL006W                 | PTC1          |
| YDR146C                                          | SWI5          | YDL006W                 | PTC1          |
| YAL024C                                          | LTE1          | YBL103C                 | RTG3          |
| YGR249W                                          | MGA1          | YBL103C                 | RTG3          |
| YBR108W                                          | YBR108W       | YOR270C                 | VPH1          |
| YLR381W                                          | CTF3          | YPR119W                 | CLB2          |
| YJR024C                                          | MDE1          | YMR153W                 | NUP53         |
| YDR318W                                          | MCM21         | YJR035W                 | RAD26         |
| YLR119W                                          | SRN2          | YLR398C                 | SKI2          |
| YCR081W                                          | SRB8          | YDR146C                 | SWI5          |
| YMR172W                                          | HOT1          | YIL008W                 | URM1          |
| YPL042C                                          | SSN3          | YNR052C                 | POP2          |
| YNL058C                                          | YNL058C       | YDL192W                 | ARF1          |
| YGR241C                                          | YAP1802       | YFL026W                 | STE2          |

| Predictions at threshold level 0.75 continued... |               |                         |               |
|--------------------------------------------------|---------------|-------------------------|---------------|
| Gene1 of predicted pair                          |               | Gene2 of predicted pair |               |
| Systematic Name                                  | Standard Name | Systematic Name         | Standard Name |
| YGL095C                                          | VPS45         | YOR035C                 | SHE4          |
| YDR004W                                          | RAD57         | YER162C                 | RAD4          |
| YHR178W                                          | STB5          | YMR127C                 | SAS2          |
| YDR004W                                          | RAD57         | YOL090W                 | MSH2          |
| YBR111W-A                                        | SUS1          | YBR009C                 | HHF1          |
| YGL078C                                          | DBP3          | YPL161C                 | BEM4          |
| YBR131W                                          | CCZ1          | YNL051W                 | COG5          |
| YOR106W                                          | VAM3          | YDL077C                 | VAM6          |
| YBR200W                                          | BEM1          | YFR030W                 | MET10         |
| YHR134W                                          | WSS1          | YHR178W                 | STB5          |
| YMR055C                                          | BUB2          | YGR188C                 | BUB1          |
| YJL124C                                          | LSM1          | YPR120C                 | CLB5          |
| YCR081W                                          | SRB8          | YOL051W                 | GAL11         |
| YDR080W                                          | VPS41         | YKR030W                 | GMH1          |
| YCL037C                                          | SRO9          | YPR032W                 | SRO7          |
| YMR216C                                          | SKY1          | YNR032W                 | PPG1          |
| YNR072W                                          | HXT17         | YJR084W                 | CSN12         |
| YPL037C                                          | EGD1          | YDR252W                 | BTT1          |
| YJR084W                                          | CSN12         | YEL060C                 | PRB1          |
| YDR507C                                          | GIN4          | YJL095W                 | BCK1          |
| YNL041C                                          | COG6          | YNL076W                 | MKS1          |
| YDR293C                                          | SSD1          | YJL053W                 | PEP8          |
| YKL025C                                          | PAN3          | YOR127W                 | RGA1          |
| YPR017C                                          | DSS4          | YML071C                 | COG8          |
| YER016W                                          | BIM1          | YBR089C-A               | NHP6B         |
| YPL042C                                          | SSN3          | YMR038C                 | CCS1          |
| YDR202C                                          | RAV2          | YJR032W                 | CPR7          |
| YHR013C                                          | ARD1          | YJR084W                 | CSN12         |
| YGR239C                                          | PEX21         | YDR142C                 | PEX7          |

| Predictions at threshold level 0.75 continued... |               |                         |               |
|--------------------------------------------------|---------------|-------------------------|---------------|
| Gene1 of predicted pair                          |               | Gene2 of predicted pair |               |
| Systematic Name                                  | Standard Name | Systematic Name         | Standard Name |
| YLR254C                                          | NDL1          | YOR141C                 | ARP8          |
| YNL206C                                          | RTT106        | YMR199W                 | CLN1          |
| YDL047W                                          | SIT4          | YLR182W                 | SWI6          |
| YCR020C-A                                        | MAK31         | YNL297C                 | MON2          |
| YJR032W                                          | CPR7          | YBR114W                 | RAD16         |
| YLR381W                                          | CTF3          | YJL006C                 | CTK2          |
| YEL065W                                          | SIT1          | YLR180W                 | SAM1          |
| YKL139W                                          | CTK1          | YNL054W                 | VAC7          |
| YEL043W                                          | YEL043W       | YGR105W                 | VMA21         |
| YGR072W                                          | UPF3          | YOR109W                 | INP53         |
| YOR023C                                          | AHC1          | YEL053C                 | MAK10         |
| YBL079W                                          | NUP170        | YGL163C                 | RAD54         |
| YNL230C                                          | ELA1          | YLR219W                 | MSC3          |
| YKL048C                                          | ELM1          | YLR094C                 | GIS3          |
| YHL031C                                          | GOS1          | YHL020C                 | OPI1          |
| YBR112C                                          | CYC8          | YGL025C                 | PGD1          |
| YBR200W                                          | BEM1          | YOR290C                 | SNF2          |
| YKR072C                                          | SIS2          | YHR178W                 | STB5          |
| YJL138C                                          | TIF2          | YPR119W                 | CLB2          |
| YPL022W                                          | RAD1          | YGR135W                 | PRE9          |
| YDR293C                                          | SSD1          | YPL195W                 | APL5          |
| YNL307C                                          | MCK1          | YLR180W                 | SAM1          |
| YLR381W                                          | CTF3          | YHR114W                 | BZZ1          |
| YKR020W                                          | VPS51         | YBL025W                 | RRN10         |
| YBR217W                                          | ATG12         | YOR327C                 | SNC2          |
| YGL237C                                          | HAP2          | YDR440W                 | DOT1          |
| YLR360W                                          | VPS38         | YHR012W                 | VPS29         |
| YCL001W                                          | RER1          | YGL115W                 | SNF4          |
| YER054C                                          | GIP2          | YPR119W                 | CLB2          |

| Predictions at threshold level 0.75 continued... |               |                         |               |
|--------------------------------------------------|---------------|-------------------------|---------------|
| Gene1 of predicted pair                          |               | Gene2 of predicted pair |               |
| Systematic Name                                  | Standard Name | Systematic Name         | Standard Name |
| YDL184C                                          | RPL41A        | YLR094C                 | GIS3          |
| YDR309C                                          | GIC2          | YLR425W                 | TUS1          |
| YMR095C                                          | SNO1          | YBR171W                 | SEC66         |
| YCR034W                                          | FEN1          | YJL138C                 | TIF2          |
| YDR293C                                          | SSD1          | YBR171W                 | SEC66         |
| YLR094C                                          | GIS3          | YLR320W                 | MMS22         |
| YLR371W                                          | ROM2          | YML071C                 | COG8          |
| YKL048C                                          | ELM1          | YBL101C                 | ECM21         |
| YFR031C-A                                        | RPL2A         | YLR360W                 | VPS38         |
| YIL036W                                          | CST6          | YJL183W                 | MNN11         |
| YDL020C                                          | RPN4          | YGR020C                 | VMA7          |
| YIL053W                                          | RHR2          | YML001W                 | YPT7          |
| YDL101C                                          | DUN1          | YOR080W                 | DIA2          |
| YBR084C-A                                        | RPL19A        | YIL008W                 | URM1          |
| YIL036W                                          | CST6          | YJR060W                 | CBF1          |
| YER087C-B                                        | SBH1          | YLR418C                 | CDC73         |
| YBL008W                                          | HIR1          | YBR200W                 | BEM1          |
| YBL008W                                          | HIR1          | YOR368W                 | RAD17         |
| YML103C                                          | NUP188        | YOR195W                 | SLK19         |
| YLR396C                                          | VPS33         | YGL095C                 | VPS45         |
| YML006C                                          | GIS4          | YGL115W                 | SNF4          |
| YLR090W                                          | XDJ1          | YMR153W                 | NUP53         |
| YPR030W                                          | CSR2          | YLR370C                 | ARC18         |
| YOR112W                                          | CEX1          | YML001W                 | YPT7          |
| YPR036W                                          | VMA13         | YER122C                 | GLO3          |
| YEL065W                                          | SIT1          | YOR043W                 | WHI2          |
| YBL102W                                          | SFT2          | YDR310C                 | SUM1          |
| YOR195W                                          | SLK19         | YNL206C                 | RTT106        |
| YLR288C                                          | MEC3          | YCR031C                 | RPS14A        |

| Predictions at threshold level 0.75 continued... |               |                         |               |
|--------------------------------------------------|---------------|-------------------------|---------------|
| Gene1 of predicted pair                          |               | Gene2 of predicted pair |               |
| Systematic Name                                  | Standard Name | Systematic Name         | Standard Name |
| YJL154C                                          | VPS35         | YLR292C                 | SEC72         |
| YNL206C                                          | RTT106        | YIL008W                 | URM1          |
| YLR061W                                          | RPL22A        | YHR013C                 | ARD1          |
| YDR507C                                          | GIN4          | YNL116W                 | DMA2          |
| YLR238W                                          | FAR10         | YMR052W                 | FAR3          |
| YDR507C                                          | GIN4          | YNL078W                 | NIS1          |
| YJR140C                                          | HIR3          | YOR243C                 | PUS7          |
| YGR261C                                          | APL6          | YJL036W                 | SNX4          |
| YDL013W                                          | SLX5          | YPR046W                 | MCM16         |
| YMR055C                                          | BUB2          | YJR032W                 | CPR7          |
| YPL161C                                          | BEM4          | YLR180W                 | SAM1          |
| YMR080C                                          | NAM7          | YPL079W                 | RPL21B        |
| YNL307C                                          | MCK1          | YBL025W                 | RRN10         |
| YFR036W                                          | CDC26         | YLR180W                 | SAM1          |
| YKL025C                                          | PAN3          | YBR107C                 | IML3          |
| YNL069C                                          | RPL16B        | YNR032W                 | PPG1          |
| YDR484W                                          | VPS52         | YLR452C                 | SST2          |
| YDL223C                                          | HBT1          | YOL121C                 | RPS19A        |
| YML103C                                          | NUP188        | YFL047W                 | RGD2          |
| YIR005W                                          | IST3          | YAR014C                 | BUD14         |
| YBR107C                                          | IML3          | YPL018W                 | CTF19         |
| YJL127C                                          | SPT10         | YNL107W                 | YAF9          |
| YNL325C                                          | FIG4          | YCR053W                 | THR4          |
| YMR026C                                          | PEX12         | YFL023W                 | BUD27         |
| YML016C                                          | PPZ1          | YLR182W                 | SWI6          |
| YMR095C                                          | SNO1          | YDR207C                 | UME6          |
| YLR425W                                          | TUS1          | YEL036C                 | ANP1          |
| YHL020C                                          | OPI1          | YER122C                 | GLO3          |
| YML115C                                          | VAN1          | YER049W                 | TPA1          |

| Predictions at threshold level 0.75 continued... |               |                         |               |
|--------------------------------------------------|---------------|-------------------------|---------------|
| Gene1 of predicted pair                          |               | Gene2 of predicted pair |               |
| Systematic Name                                  | Standard Name | Systematic Name         | Standard Name |
| YDR174W                                          | HMO1          | YPR120C                 | CLB5          |
| YPR120C                                          | CLB5          | YOL054W                 | PSH1          |
| YBL103C                                          | RTG3          | YGL115W                 | SNF4          |
| YHR134W                                          | WSS1          | YMR055C                 | BUB2          |
| YBL058W                                          | SHP1          | YLR094C                 | GIS3          |
| YHR134W                                          | WSS1          | YMR127C                 | SAS2          |
| YJL154C                                          | VPS35         | YPL256C                 | CLN2          |
| YML067C                                          | ERV41         | YKR014C                 | YPT52         |
| YFR010W                                          | UBP6          | YMR198W                 | CIK1          |
| YDL042C                                          | SIR2          | YGR252W                 | GCN5          |
| YMR026C                                          | PEX12         | YLR191W                 | PEX13         |
| YLR288C                                          | MEC3          | YGL019W                 | CKB1          |
| YNL054W                                          | VAC7          | YBR200W                 | BEM1          |
| YDL116W                                          | NUP84         | YLR429W                 | CRN1          |
| YLR337C                                          | VRP1          | YOR332W                 | VMA4          |
| YDR207C                                          | UME6          | YMR230W                 | RPS10B        |
| YKL126W                                          | YPK1          | YBR036C                 | CSG2          |
| YDR477W                                          | SNF1          | YER144C                 | UBP5          |
| YLR425W                                          | TUS1          | YHR115C                 | DMA1          |
| YFR032C-A                                        | RPL29         | YML115C                 | VAN1          |
| YMR142C                                          | RPL13B        | YLR398C                 | SKI2          |
| YDR289C                                          | RTT103        | YNL147W                 | LSM7          |
| YIL034C                                          | CAP2          | YJR135C                 | MCM22         |
| YNL264C                                          | PDR17         | YER118C                 | SHO1          |
| YDL223C                                          | HBT1          | YMR311C                 | GLC8          |
| YEL065W                                          | SIT1          | YKL139W                 | CTK1          |
| YDR309C                                          | GIC2          | YJL157C                 | FAR1          |
| YBR107C                                          | IML3          | YMR038C                 | CCS1          |
| YPL234C                                          | TFP3          | YHR039C-A               | VMA10         |

| Predictions at threshold level 0.75 continued... |               |                         |               |
|--------------------------------------------------|---------------|-------------------------|---------------|
| Gene1 of predicted pair                          |               | Gene2 of predicted pair |               |
| Systematic Name                                  | Standard Name | Systematic Name         | Standard Name |
| YJR056C                                          | YJR056C       | YLR452C                 | SST2          |
| YBR217W                                          | ATG12         | YLR398C                 | SKI2          |
| YPL161C                                          | BEM4          | YKL041W                 | VPS24         |
| YKL025C                                          | PAN3          | YBR171W                 | SEC66         |
| YHR013C                                          | ARD1          | YLR306W                 | UBC12         |
| YDR443C                                          | SSN2          | YGL025C                 | PGD1          |
| YHR114W                                          | BZZ1          | YGR188C                 | BUB1          |
| YJL204C                                          | RCY1          | YGL249W                 | ZIP2          |
| YAL024C                                          | LTE1          | YOR043W                 | WHI2          |
| YPL240C                                          | HSP82         | YLR419W                 | YLR419W       |
| YKL032C                                          | IXR1          | YGL031C                 | RPL24A        |
| YNL215W                                          | IES2          | YLR234W                 | TOP3          |
| YNL243W                                          | SLA2          | YLR206W                 | ENT2          |
| YGL076C                                          | RPL7A         | YGL246C                 | RAI1          |
| YLR337C                                          | VRP1          | YJL095W                 | BCK1          |
| YMR172W                                          | HOT1          | YLR386W                 | VAC14         |
| YDR202C                                          | RAV2          | YHR039C-A               | VMA10         |
| YIL076W                                          | SEC28         | YJR056C                 | YJR056C       |
| YFR032C-A                                        | RPL29         | YJL183W                 | MNN11         |
| YHR079C                                          | IRE1          | YHR098C                 | SFB3          |
| YDR507C                                          | GIN4          | YJL157C                 | FAR1          |
| YER001W                                          | MNN1          | YEL036C                 | ANP1          |
| YLR254C                                          | NDL1          | YDR183W                 | PLP1          |
| YKL007W                                          | CAP1          | YNL307C                 | MCK1          |
| YCR077C                                          | PAT1          | YJL095W                 | BCK1          |
| YGL078C                                          | DBP3          | YJR084W                 | CSN12         |
| YCR066W                                          | RAD18         | YNL051W                 | COG5          |
| YAL024C                                          | LTE1          | YLR216C                 | CPR6          |
| YAL014C                                          | SYN8          | YJR125C                 | ENT3          |

| Predictions at threshold level 0.75 continued... |               |                         |               |
|--------------------------------------------------|---------------|-------------------------|---------------|
| Gene1 of predicted pair                          |               | Gene2 of predicted pair |               |
| Systematic Name                                  | Standard Name | Systematic Name         | Standard Name |
| YMR224C                                          | MRE11         | YFL023W                 | BUD27         |
| YNL025C                                          | SSN8          | YIL076W                 | SEC28         |
| YOR195W                                          | SLK19         | YJR063W                 | RPA12         |
| YLR386W                                          | VAC14         | YNL325C                 | FIG4          |
| YPL256C                                          | CLN2          | YDR310C                 | SUM1          |
| YNL243W                                          | SLA2          | YMR022W                 | UBC7          |
| YPL140C                                          | MKK2          | YDL159W                 | STE7          |
| YLL007C                                          | YLL007C       | YDR318W                 | MCM21         |
| YKR061W                                          | KTR2          | YLR410W                 | VIP1          |
| YKL139W                                          | CTK1          | YKL041W                 | VPS24         |
| YML115C                                          | VAN1          | YKL126W                 | YPK1          |
| YKL160W                                          | ELF1          | YIR005W                 | IST3          |
| YGR108W                                          | CLB1          | YLR079W                 | SIC1          |
| YMR224C                                          | MRE11         | YFR030W                 | MET10         |
| YPR046W                                          | MCM16         | YJL095W                 | BCK1          |
| YOR132W                                          | VPS17         | YLR386W                 | VAC14         |
| YOL111C                                          | MDY2          | YMR152W                 | YIM1          |
| YJL058C                                          | BIT61         | YDR254W                 | CHL4          |
| YHL031C                                          | GOS1          | YEL051W                 | VMA8          |
| YBR108W                                          | YBR108W       | YOL081W                 | IRA2          |
| YMR004W                                          | MVP1          | YGL212W                 | VAM7          |
| YNL166C                                          | BNI5          | YDR310C                 | SUM1          |
| YHR010W                                          | RPL27A        | YJR090C                 | GRR1          |
| YLL039C                                          | UBI4          | YMR276W                 | DSK2          |
| YMR039C                                          | SUB1          | YOL145C                 | CTR9          |
| YCR077C                                          | PAT1          | YCR086W                 | CSM1          |
| YOR290C                                          | SNF2          | YNL058C                 | YNL058C       |
| YBR215W                                          | HPC2          | YOR368W                 | RAD17         |
| YHR052W                                          | CIC1          | YGL189C                 | RPS26A        |



| Predictions at threshold level 0.75 continued... |               |                         |               |
|--------------------------------------------------|---------------|-------------------------|---------------|
| Gene1 of predicted pair                          |               | Gene2 of predicted pair |               |
| Systematic Name                                  | Standard Name | Systematic Name         | Standard Name |
| YPR018W                                          | RLF2          | YDL042C                 | SIR2          |
| YGL237C                                          | HAP2          | YPR046W                 | MCM16         |
| YBR215W                                          | HPC2          | YDR076W                 | RAD55         |
| YNL206C                                          | RTT106        | YCR084C                 | TUP1          |
| YMR039C                                          | SUB1          | YJL124C                 | LSM1          |
| YKL048C                                          | ELM1          | YBR019C                 | GAL10         |
| YHR013C                                          | ARD1          | YGR135W                 | PRE9          |
| YKL048C                                          | ELM1          | YNL076W                 | MKS1          |
| YDL155W                                          | CLB3          | YMR038C                 | CCS1          |
| YOR080W                                          | DIA2          | YOL090W                 | MSH2          |
| YJL124C                                          | LSM1          | YNL147W                 | LSM7          |
| YLR381W                                          | CTF3          | YIL103W                 | DPH1          |
| YML095C                                          | RAD10         | YDL047W                 | SIT4          |
| YLR386W                                          | VAC14         | YJR063W                 | RPA12         |
| YLR119W                                          | SRN2          | YGL212W                 | VAM7          |
| YGL163C                                          | RAD54         | YMR038C                 | CCS1          |
| YMR199W                                          | CLN1          | YER110C                 | KAP123        |
| YMR092C                                          | AIP1          | YIL034C                 | CAP2          |
| YGR004W                                          | PEX31         | YLR324W                 | PEX30         |
| YJR084W                                          | CSN12         | YMR230W                 | RPS10B        |
| YNL206C                                          | RTT106        | YDR289C                 | RTT103        |
| YBR093C                                          | PHO5          | YNL107W                 | YAF9          |
| YPR046W                                          | MCM16         | YEL056W                 | HAT2          |
| YHR152W                                          | SPO12         | YBL047C                 | EDE1          |
| YNL166C                                          | BNI5          | YAR014C                 | BUD14         |
| YIR003W                                          | YIR003W       | YIL034C                 | CAP2          |
| YGL178W                                          | MPT5          | YBR089C-A               | NHP6B         |
| YJR060W                                          | CBF1          | YHR115C                 | DMA1          |
| YNR072W                                          | HXT17         | YER162C                 | RAD4          |

| Predictions at threshold level 0.75 continued... |               |                         |               |
|--------------------------------------------------|---------------|-------------------------|---------------|
| Gene1 of predicted pair                          |               | Gene2 of predicted pair |               |
| Systematic Name                                  | Standard Name | Systematic Name         | Standard Name |
| YNL087W                                          | TCB2          | YNL238W                 | KEX2          |
| YDR335W                                          | MSN5          | YMR038C                 | CCS1          |
| YLR079W                                          | SIC1          | YOR039W                 | CKB2          |
| YGR261C                                          | APL6          | YHR060W                 | VMA22         |
| YGR071C                                          | YGR071C       | YDR318W                 | MCM21         |
| YLR360W                                          | VPS38         | YHR161C                 | YAP1801       |
| YAL024C                                          | LTE1          | YLR381W                 | CTF3          |
| YIL034C                                          | CAP2          | YLR447C                 | VMA6          |
| YGR014W                                          | MSB2          | YJL183W                 | MNN11         |
| YGR249W                                          | MGA1          | YBR019C                 | GAL10         |
| YLL007C                                          | YLL007C       | YHR178W                 | STB5          |
| YGL174W                                          | BUD13         | YKL074C                 | MUD2          |
| YGR072W                                          | UPF3          | YPL234C                 | TFP3          |
| YMR055C                                          | BUB2          | YDR144C                 | MKC7          |
| YJR052W                                          | RAD7          | YGL115W                 | SNF4          |
| YKL213C                                          | DOA1          | YLR182W                 | SWI6          |
| YHR205W                                          | SCH9          | YOR027W                 | STI1          |
| YPL024W                                          | RMI1          | YGL003C                 | CDH1          |
| YKL048C                                          | ELM1          | YDL192W                 | ARF1          |
| YMR179W                                          | SPT21         | YMR038C                 | CCS1          |
| YBL003C                                          | HTA2          | YPL248C                 | GAL4          |
| YBR131W                                          | CCZ1          | YML071C                 | COG8          |
| YHR134W                                          | WSS1          | YBL021C                 | HAP3          |
| YCR077C                                          | PAT1          | YOR308C                 | SNU66         |
| YKL139W                                          | CTK1          | YHR111W                 | UBA4          |
| YKR020W                                          | VPS51         | YDR153C                 | ENT5          |
| YER116C                                          | SLX8          | YBR036C                 | CSG2          |
| YPR102C                                          | RPL11A        | YER102W                 | RPS8B         |
| YHR134W                                          | WSS1          | YCL037C                 | SRO9          |

| Predictions at threshold level 0.75 continued... |               |                         |               |
|--------------------------------------------------|---------------|-------------------------|---------------|
| Gene1 of predicted pair                          |               | Gene2 of predicted pair |               |
| Systematic Name                                  | Standard Name | Systematic Name         | Standard Name |
| YJL036W                                          | SNX4          | YMR216C                 | SKY1          |
| YMR038C                                          | CCS1          | YAL002W                 | VPS8          |
| YKL139W                                          | CTK1          | YMR055C                 | BUB2          |
| YLR371W                                          | ROM2          | YLR370C                 | ARC18         |
| YKL007W                                          | CAP1          | YHR111W                 | UBA4          |
| YPR046W                                          | MCM16         | YDR207C                 | UME6          |
| YGL087C                                          | MMS2          | YDR155C                 | CPR1          |
| YMR231W                                          | PEP5          | YPR028W                 | YOP1          |
| YKR020W                                          | VPS51         | YJR033C                 | RAV1          |
| YMR224C                                          | MRE11         | YLR425W                 | TUS1          |
| YNL215W                                          | IES2          | YNR052C                 | POP2          |
| YMR055C                                          | BUB2          | YHR200W                 | RPN10         |
| YGL190C                                          | CDC55         | YNL250W                 | RAD50         |
| YNL051W                                          | COG5          | YNR032W                 | PPG1          |
| YDL101C                                          | DUN1          | YDR207C                 | UME6          |
| YAL024C                                          | LTE1          | YLR410W                 | VIP1          |
| YPR046W                                          | MCM16         | YLR398C                 | SKI2          |
| YNL025C                                          | SSN8          | YIR005W                 | IST3          |
| YMR199W                                          | CLN1          | YLR371W                 | ROM2          |
| YNL264C                                          | PDR17         | YNL107W                 | YAF9          |
| YJL176C                                          | SWI3          | YFR010W                 | UBP6          |
| YLR079W                                          | SIC1          | YLR370C                 | ARC18         |
| YGL033W                                          | HOP2          | YOR290C                 | SNF2          |
| YLR192C                                          | HCR1          | YPL195W                 | APL5          |
| YAL024C                                          | LTE1          | YDL192W                 | ARF1          |
| YGL124C                                          | MON1          | YHR114W                 | BZZ1          |
| YBR127C                                          | VMA2          | YPR119W                 | CLB2          |
| YKL032C                                          | IXR1          | YPR046W                 | MCM16         |
| YML095C                                          | RAD10         | YJR032W                 | CPR7          |

| Predictions at threshold level 0.75 continued... |               |                         |               |
|--------------------------------------------------|---------------|-------------------------|---------------|
| Gene1 of predicted pair                          |               | Gene2 of predicted pair |               |
| Systematic Name                                  | Standard Name | Systematic Name         | Standard Name |
| YEL050C                                          | RML2          | YDL047W                 | SIT4          |
| YGL200C                                          | EMP24         | YML097C                 | VPS9          |
| YDR295C                                          | HDA2          | YPR179C                 | HDA3          |
| YLR386W                                          | VAC14         | YGR135W                 | PRE9          |
| YDR363W-A                                        | SEM1          | YPR120C                 | CLB5          |
| YJL089W                                          | SIP4          | YPL248C                 | GAL4          |
| YNL041C                                          | COG6          | YJR084W                 | CSN12         |
| YDR477W                                          | SNF1          | YML115C                 | VAN1          |
| YGL215W                                          | CLG1          | YOR080W                 | DIA2          |
| YOR066W                                          | MSA1          | YPR046W                 | MCM16         |
| YDR105C                                          | TMS1          | YPR149W                 | NCE102        |
| YNL032W                                          | SIW14         | YJR056C                 | YJR056C       |
| YOR106W                                          | VAM3          | YER049W                 | TPA1          |
| YHR187W                                          | IKI1          | YDL047W                 | SIT4          |
| YBR215W                                          | HPC2          | YLR182W                 | SWI6          |
| YGL200C                                          | EMP24         | YCL001W                 | RER1          |
| YOR066W                                          | MSA1          | YMR214W                 | SCJ1          |
| YDR293C                                          | SSD1          | YOR358W                 | HAP5          |
| YGR070W                                          | ROM1          | YLR425W                 | TUS1          |
| YGR054W                                          | YGR054W       | YHR012W                 | VPS29         |
| YMR026C                                          | PEX12         | YPL161C                 | BEM4          |
| YLR337C                                          | VRP1          | YJL190C                 | RPS22A        |
| YDR293C                                          | SSD1          | YOR023C                 | AHC1          |
| YNL025C                                          | SSN8          | YHR167W                 | THP2          |
| YMR055C                                          | BUB2          | YCR077C                 | PAT1          |
| YER044C-A                                        | MEI4          | YMR133W                 | REC114        |
| YNL201C                                          | PSY2          | YJR135C                 | MCM22         |
| YHL020C                                          | OPI1          | YJR033C                 | RAV1          |
| YPL024W                                          | RMI1          | YJR084W                 | CSN12         |

| Predictions at threshold level 0.75 continued... |               |                         |               |
|--------------------------------------------------|---------------|-------------------------|---------------|
| Gene1 of predicted pair                          |               | Gene2 of predicted pair |               |
| Systematic Name                                  | Standard Name | Systematic Name         | Standard Name |
| YGR108W                                          | CLB1          | YGL115W                 | SNF4          |
| YLR386W                                          | VAC14         | YPR051W                 | MAK3          |
| YDR142C                                          | PEX7          | YGL153W                 | PEX14         |
| YPL024W                                          | RMI1          | YCL037C                 | SRO9          |
| YLR083C                                          | EMP70         | YPL234C                 | TFP3          |
| YBR111W-A                                        | SUS1          | YBR010W                 | HHT1          |
| YDR103W                                          | STE5          | YDR335W                 | MSN5          |
| YHR156C                                          | LIN1          | YNL032W                 | SIW14         |
| YJL124C                                          | LSM1          | YJR060W                 | CBF1          |
| YIL159W                                          | BNR1          | YMR016C                 | SOK2          |
| YNL307C                                          | MCK1          | YOR066W                 | MSA1          |
| YCR020C-A                                        | MAK31         | YGR020C                 | VMA7          |
| YDR469W                                          | SDC1          | YHR115C                 | DMA1          |
| YBR107C                                          | IML3          | YKL114C                 | APN1          |
| YGR241C                                          | YAP1802       | YDR358W                 | GGA1          |
| YPL256C                                          | CLN2          | YJL095W                 | BCK1          |
| YMR224C                                          | MRE11         | YGR249W                 | MGA1          |
| YDR137W                                          | RGP1          | YER161C                 | SPT2          |
| YGR129W                                          | SYF2          | YCR063W                 | BUD31         |
| YDR477W                                          | SNF1          | YNL041C                 | COG6          |
| YDR383C                                          | NKP1          | YKL139W                 | CTK1          |
| YGL124C                                          | MON1          | YNL116W                 | DMA2          |
| YLR192C                                          | HCR1          | YML071C                 | COG8          |
| YGR081C                                          | SLX9          | YGL163C                 | RAD54         |
| YGL025C                                          | PGD1          | YKR048C                 | NAP1          |
| YLR248W                                          | RCK2          | YGL158W                 | RCK1          |
| YMR243C                                          | ZRC1          | YGL158W                 | RCK1          |
| YGL078C                                          | DBP3          | YFR010W                 | UBP6          |
| YGL178W                                          | MPT5          | YLR330W                 | CHS5          |

| Predictions at threshold level 0.75 continued... |               |                         |               |
|--------------------------------------------------|---------------|-------------------------|---------------|
| Gene1 of predicted pair                          |               | Gene2 of predicted pair |               |
| Systematic Name                                  | Standard Name | Systematic Name         | Standard Name |
| YGL078C                                          | DBP3          | YHR039C-A               | VMA10         |
| YPL161C                                          | BEM4          | YER040W                 | GLN3          |
| YOR043W                                          | WHI2          | YOR038C                 | HIR2          |
| YOL018C                                          | TLG2          | YDL047W                 | SIT4          |
| YOR069W                                          | VPS5          | YPL105C                 | YPL105C       |
| YKL116C                                          | PRR1          | YDR310C                 | SUM1          |
| YDR335W                                          | MSN5          | YOR141C                 | ARP8          |
| YLR234W                                          | TOP3          | YOR014W                 | RTS1          |
| YML071C                                          | COG8          | YAR014C                 | BUD14         |
| YKL116C                                          | PRR1          | YNL032W                 | SIW14         |
| YHL031C                                          | GOS1          | YKR001C                 | VPS1          |
| YGR261C                                          | APL6          | YCR066W                 | RAD18         |
| YDR363W-A                                        | SEM1          | YOR141C                 | ARP8          |
| YDR108W                                          | GSG1          | YNL238W                 | KEX2          |
| YDL184C                                          | RPL41A        | YHR081W                 | LRP1          |
| YPR154W                                          | PIN3          | YBL106C                 | SRO77         |
| YGL025C                                          | PGD1          | YER162C                 | RAD4          |
| YLR192C                                          | HCR1          | YNL307C                 | MCK1          |
| YEL009C                                          | GCN4          | YOR290C                 | SNF2          |
| YOR290C                                          | SNF2          | YNL236W                 | SIN4          |
| YPR017C                                          | DSS4          | YDR207C                 | UME6          |
| YBR045C                                          | GIP1          | YDR103W                 | STE5          |
| YHR160C                                          | PEX18         | YOL044W                 | PEX15         |
| YLR360W                                          | VPS38         | YDR144C                 | MKC7          |
| YDR440W                                          | DOT1          | YLR182W                 | SWI6          |
| YBR215W                                          | HPC2          | YJR005W                 | APL1          |
| YNL087W                                          | TCB2          | YOR270C                 | VPH1          |
| YNL044W                                          | YIP3          | YER122C                 | GLO3          |
| YDR146C                                          | SWI5          | YPL253C                 | VIK1          |

| Predictions at threshold level 0.75 continued... |               |                         |               |
|--------------------------------------------------|---------------|-------------------------|---------------|
| Gene1 of predicted pair                          |               | Gene2 of predicted pair |               |
| Systematic Name                                  | Standard Name | Systematic Name         | Standard Name |
| YDR293C                                          | SSD1          | YBL102W                 | SFT2          |
| YPL037C                                          | EGD1          | YLR370C                 | ARC18         |
| YFL013C                                          | IES1          | YGL174W                 | BUD13         |
| YNL106C                                          | INP52         | YBL027W                 | RPL19B        |
| YKL139W                                          | CTK1          | YER068W                 | MOT2          |
| YIL008W                                          | URM1          | YJL187C                 | SWE1          |
| YDR261C                                          | EXG2          | YOL121C                 | RPS19A        |
| YGR270W                                          | YTA7          | YGL151W                 | NUT1          |
| YGR020C                                          | VMA7          | YLR447C                 | VMA6          |
| YER001W                                          | MNN1          | YFL048C                 | EMP47         |
| YOR112W                                          | CEX1          | YMR004W                 | MVP1          |
| YHR073W                                          | OSH3          | YOR358W                 | HAP5          |
| YNL229C                                          | URE2          | YDR264C                 | AKR1          |
| YDR264C                                          | AKR1          | YDR183W                 | PLP1          |
| YKR020W                                          | VPS51         | YEL051W                 | VMA8          |
| YML095C                                          | RAD10         | YDR076W                 | RAD55         |
| YGL066W                                          | SGF73         | YLR386W                 | VAC14         |
| YCL037C                                          | SRO9          | YHR039C-A               | VMA10         |
| YDR293C                                          | SSD1          | YER120W                 | SCS2          |
| YJL127C                                          | SPT10         | YBR171W                 | SEC66         |
| YMR004W                                          | MVP1          | YDR319C                 | YDR319C       |
| YBR171W                                          | SEC66         | YPL158C                 | YPL158C       |
| YMR224C                                          | MRE11         | YKL116C                 | PRR1          |
| YHR012W                                          | VPS29         | YNR032W                 | PPG1          |
| YJL006C                                          | CTK2          | YPL018W                 | CTF19         |
| YNL041C                                          | COG6          | YEL060C                 | PRB1          |
| YJR033C                                          | RAV1          | YDR310C                 | SUM1          |
| YGR105W                                          | VMA21         | YMR054W                 | STV1          |
| YDL013W                                          | SLX5          | YPR120C                 | CLB5          |

| Predictions at threshold level 0.75 continued... |               |                         |               |
|--------------------------------------------------|---------------|-------------------------|---------------|
| Gene1 of predicted pair                          |               | Gene2 of predicted pair |               |
| Systematic Name                                  | Standard Name | Systematic Name         | Standard Name |
| YDL116W                                          | NUP84         | YFL023W                 | BUD27         |
| YAL024C                                          | LTE1          | YBR274W                 | CHK1          |
| YGR129W                                          | SYF2          | YGL174W                 | BUD13         |
| YMR199W                                          | CLN1          | YGL208W                 | SIP2          |
| YLL039C                                          | UBI4          | YBL101C                 | ECM21         |
| YLR079W                                          | SIC1          | YKR024C                 | DBP7          |
| YGR104C                                          | SRB5          | YBR009C                 | HHF1          |
| YMR095C                                          | SNO1          | YPL161C                 | BEM4          |
| YOR033C                                          | EXO1          | YOL090W                 | MSH2          |
| YGL013C                                          | PDR1          | YPR119W                 | CLB2          |
| YOL111C                                          | MDY2          | YPR046W                 | MCM16         |
| YBL106C                                          | SRO77         | YGL198W                 | YIP4          |
| YOR109W                                          | INP53         | YAR014C                 | BUD14         |
| YJL172W                                          | CPS1          | YLR441C                 | RPS1A         |
| YFR031C-A                                        | RPL2A         | YER162C                 | RAD4          |
| YER139C                                          | YER139C       | YMR230W                 | RPS10B        |
| YKL048C                                          | ELM1          | YJR084W                 | CSN12         |
| YBL103C                                          | RTG3          | YPL195W                 | APL5          |
| YDR383C                                          | NKP1          | YNR052C                 | POP2          |
| YIL076W                                          | SEC28         | YOR112W                 | CEX1          |
| YJL176C                                          | SWI3          | YNL079C                 | TPM1          |
| YDR156W                                          | RPA14         | YDR439W                 | LRS4          |
| YHR039C-A                                        | VMA10         | YOR368W                 | RAD17         |
| YLR452C                                          | SST2          | YDR310C                 | SUM1          |
| YPR120C                                          | CLB5          | YGR188C                 | BUB1          |
| YNL025C                                          | SSN8          | YDR378C                 | LSM6          |
| YNL047C                                          | SLM2          | YJL058C                 | BIT61         |
| YEL065W                                          | SIT1          | YGL003C                 | CDH1          |
| YBL051C                                          | PIN4          | YJL187C                 | SWE1          |



| Predictions at threshold level 0.75 continued... |               |                         |               |
|--------------------------------------------------|---------------|-------------------------|---------------|
| Gene1 of predicted pair                          |               | Gene2 of predicted pair |               |
| Systematic Name                                  | Standard Name | Systematic Name         | Standard Name |
| YMR133W                                          | REC114        | YDR358W                 | GGA1          |
| YDL077C                                          | VAM6          | YEL042W                 | GDA1          |
| YCL001W                                          | RER1          | YGL054C                 | ERV14         |
| YGR020C                                          | VMA7          | YNL297C                 | MON2          |
| YNL051W                                          | COG5          | YDR153C                 | ENT5          |
| YBR290W                                          | BSD2          | YJR135C                 | MCM22         |
| YLR410W                                          | VIP1          | YDL047W                 | SIT4          |
| YKL139W                                          | CTK1          | YCR086W                 | CSM1          |
| YBR194W                                          | SOY1          | YIL076W                 | SEC28         |
| YDR156W                                          | RPA14         | YOR141C                 | ARP8          |
| YNL025C                                          | SSN8          | YKL160W                 | ELF1          |
| YNL106C                                          | INP52         | YDR439W                 | LRS4          |
| YIL008W                                          | URM1          | YDR289C                 | RTT103        |
| YHR010W                                          | RPL27A        | YGL246C                 | RAI1          |
| YLR447C                                          | VMA6          | YGR105W                 | VMA21         |
| YBR215W                                          | HPC2          | YER139C                 | YER139C       |
| YKR035W-A                                        | DID2          | YOR035C                 | SHE4          |
| YMR116C                                          | ASC1          | YBL025W                 | RRN10         |
| YLR337C                                          | VRP1          | YOR023C                 | AHC1          |
| YDR293C                                          | SSD1          | YER110C                 | KAP123        |
| YJR040W                                          | GEF1          | YCL001W                 | RER1          |
| YLR452C                                          | SST2          | YDL083C                 | RPS16B        |
| YDR245W                                          | MNN10         | YOR308C                 | SNU66         |
| YLR192C                                          | HCR1          | YMR230W                 | RPS10B        |
| YOR195W                                          | SLK19         | YDR439W                 | LRS4          |
| YEL027W                                          | CUP5          | YKL119C                 | VPH2          |
| YDR129C                                          | SAC6          | YDL155W                 | CLB3          |
| YMR039C                                          | SUB1          | YKR072C                 | SIS2          |
| YJR140C                                          | HIR3          | YCL037C                 | SRO9          |

| Predictions at threshold level 0.75 continued... |               |                         |               |
|--------------------------------------------------|---------------|-------------------------|---------------|
| Gene1 of predicted pair                          |               | Gene2 of predicted pair |               |
| Systematic Name                                  | Standard Name | Systematic Name         | Standard Name |
| YKL048C                                          | ELM1          | YNL225C                 | CNM67         |
| YMR039C                                          | SUB1          | YNL107W                 | YAF9          |
| YGL178W                                          | MPT5          | YPL031C                 | PHO85         |
| YBR073W                                          | RDH54         | YPR046W                 | MCM16         |
| YGL087C                                          | MMS2          | YHR012W                 | VPS29         |
| YPL240C                                          | HSP82         | YMR165C                 | PAH1          |
| YPR072W                                          | NOT5          | YNL236W                 | SIN4          |
| YML115C                                          | VAN1          | YOR035C                 | SHE4          |
| YMR246W                                          | FAA4          | YOR059C                 | YOR059C       |
| YML038C                                          | YMD8          | YEL043W                 | YEL043W       |
| YMR224C                                          | MRE11         | YIL076W                 | SEC28         |
| YOR195W                                          | SLK19         | YGR188C                 | BUB1          |
| YKL139W                                          | CTK1          | YPR120C                 | CLB5          |
| YPR084W                                          | YPR084W       | YEL051W                 | VMA8          |
| YMR039C                                          | SUB1          | YDR146C                 | SWI5          |
| YHR111W                                          | UBA4          | YIL103W                 | DPH1          |
| YGR241C                                          | YAP1802       | YDL161W                 | ENT1          |
| YMR026C                                          | PEX12         | YLR441C                 | RPS1A         |
| YDR225W                                          | HTA1          | YOR368W                 | RAD17         |
| YDL116W                                          | NUP84         | YNL107W                 | YAF9          |
| YKL032C                                          | IXR1          | YHL002W                 | HSE1          |
| YML115C                                          | VAN1          | YER139C                 | YER139C       |
| YKL010C                                          | UFD4          | YGR184C                 | UBR1          |
| YML115C                                          | VAN1          | YNL076W                 | MKS1          |
| YDR477W                                          | SNF1          | YBL025W                 | RRN10         |
| YML001W                                          | YPT7          | YEL051W                 | VMA8          |
| YLR441C                                          | RPS1A         | YEL060C                 | PRB1          |
| YGL161C                                          | YIP5          | YDR076W                 | RAD55         |
| YPR120C                                          | CLB5          | YGL175C                 | SAE2          |

| Predictions at threshold level 0.75 continued... |               |                         |               |
|--------------------------------------------------|---------------|-------------------------|---------------|
| Gene1 of predicted pair                          |               | Gene2 of predicted pair |               |
| Systematic Name                                  | Standard Name | Systematic Name         | Standard Name |
| YGL200C                                          | EMP24         | YOR327C                 | SNC2          |
| YDR477W                                          | SNF1          | YJL172W                 | CPS1          |
| YOR141C                                          | ARP8          | YNL225C                 | CNM67         |
| YHR060W                                          | VMA22         | YGL124C                 | MON1          |
| YPL105C                                          | YPL105C       | YPR032W                 | SRO7          |
| YBL058W                                          | SHP1          | YEL053C                 | MAK10         |
| YCR020C-A                                        | MAK31         | YHL020C                 | OPI1          |
| YLR006C                                          | SSK1          | YGR152C                 | RSR1          |
| YNL238W                                          | KEX2          | YJR032W                 | CPR7          |
| YDR443C                                          | SSN2          | YOR043W                 | WHI2          |
| YGR108W                                          | CLB1          | YOL067C                 | RTG1          |
| YGR135W                                          | PRE9          | YLR370C                 | ARC18         |
| YPL050C                                          | MNN9          | YFR036W                 | CDC26         |
| YNL025C                                          | SSN8          | YOR038C                 | HIR2          |
| YMR055C                                          | BUB2          | YHR115C                 | DMA1          |
| YML103C                                          | NUP188        | YIL036W                 | CST6          |
| YIR009W                                          | MSL1          | YKR099W                 | BAS1          |
| YHR156C                                          | LIN1          | YFL023W                 | BUD27         |
| YJL124C                                          | LSM1          | YLR399C                 | BDF1          |
| YDR507C                                          | GIN4          | YLR425W                 | TUS1          |
| YMR004W                                          | MVP1          | YDL186W                 | YDL186W       |
| YKL010C                                          | UFD4          | YLL039C                 | UBI4          |
| YPL042C                                          | SSN3          | YBR112C                 | CYC8          |
| YPL042C                                          | SSN3          | YLR410W                 | VIP1          |
| YHR134W                                          | WSS1          | YHR114W                 | BZZ1          |
| YJL154C                                          | VPS35         | YPL120W                 | VPS30         |
| YMR164C                                          | MSS11         | YMR199W                 | CLN1          |
| YER087C-B                                        | SBH1          | YDR392W                 | SPT3          |
| YHL031C                                          | GOS1          | YOR327C                 | SNC2          |

| Predictions at threshold level 0.75 continued... |               |                         |               |
|--------------------------------------------------|---------------|-------------------------|---------------|
| Gene1 of predicted pair                          |               | Gene2 of predicted pair |               |
| Systematic Name                                  | Standard Name | Systematic Name         | Standard Name |
| YPR017C                                          | DSS4          | YDR108W                 | GSG1          |
| YLR386W                                          | VAC14         | YER040W                 | GLN3          |
| YLR441C                                          | RPS1A         | YNL307C                 | MCK1          |
| YNL329C                                          | PEX6          | YDR440W                 | DOT1          |
| YAL024C                                          | LTE1          | YML016C                 | PPZ1          |
| YDL006W                                          | PTC1          | YDR358W                 | GGA1          |
| YMR216C                                          | SKY1          | YJL004C                 | SYS1          |
| YIL103W                                          | DPH1          | YML112W                 | CTK3          |
| YKL116C                                          | PRR1          | YPL161C                 | BEM4          |
| YNR072W                                          | HXT17         | YMR152W                 | YIM1          |
| YKR001C                                          | VPS1          | YCL001W                 | RER1          |
| YDR202C                                          | RAV2          | YEL043W                 | YEL043W       |
| YFL003C                                          | MSH4          | YGL249W                 | ZIP2          |
| YJL154C                                          | VPS35         | YML038C                 | YMD8          |
| YMR172W                                          | HOT1          | YGR108W                 | CLB1          |
| YPR017C                                          | DSS4          | YJR033C                 | RAV1          |
| YNL243W                                          | SLA2          | YJR058C                 | APS2          |
| YML012W                                          | ERV25         | YLR093C                 | NYV1          |
| YER110C                                          | KAP123        | YBR009C                 | HHF1          |
| YLR095C                                          | IOC2          | YOR290C                 | SNF2          |
| YCL037C                                          | SRO9          | YPL079W                 | RPL21B        |
| YJL210W                                          | PEX2          | YDR244W                 | PEX5          |
| YAL024C                                          | LTE1          | YER162C                 | RAD4          |
| YGL003C                                          | CDH1          | YER122C                 | GLO3          |
| YDR422C                                          | SIP1          | YGL179C                 | TOS3          |
| YPL106C                                          | SSE1          | YJL006C                 | CTK2          |
| YCR081W                                          | SRB8          | YER096W                 | SHC1          |
| YLR399C                                          | BDF1          | YNL031C                 | HHT2          |
| YNL238W                                          | KEX2          | YPL195W                 | APL5          |

| Predictions at threshold level 0.75 continued... |               |                         |               |
|--------------------------------------------------|---------------|-------------------------|---------------|
| Gene1 of predicted pair                          |               | Gene2 of predicted pair |               |
| Systematic Name                                  | Standard Name | Systematic Name         | Standard Name |
| YPR046W                                          | MCM16         | YER122C                 | GLO3          |
| YER144C                                          | UBP5          | YBR280C                 | SAF1          |
| YHR205W                                          | SCH9          | YBR260C                 | RGD1          |
| YDR004W                                          | RAD57         | YHR013C                 | ARD1          |
| YDL020C                                          | RPN4          | YBR228W                 | SLX1          |
| YNL243W                                          | SLA2          | YPL031C                 | PHO85         |
| YHR098C                                          | SFB3          | YFL031W                 | HAC1          |
| YIL036W                                          | CST6          | YGL252C                 | RTG2          |
| YLR386W                                          | VAC14         | YLR102C                 | APC9          |
| YDL020C                                          | RPN4          | YGL237C                 | HAP2          |
| YLR095C                                          | IOC2          | YOR066W                 | MSA1          |
| YOL136C                                          | PFK27         | YLR043C                 | TRX1          |
| YMR224C                                          | MRE11         | YGL163C                 | RAD54         |
| YFR024C-A                                        | LSB3          | YMR253C                 | YMR253C       |
| YEL051W                                          | VMA8          | YLR309C                 | IMH1          |
| YIL076W                                          | SEC28         | YBR171W                 | SEC66         |
| YGL178W                                          | MPT5          | YPR072W                 | NOT5          |
| YEL053C                                          | MAK10         | YAR014C                 | BUD14         |
| YKL178C                                          | STE3          | YJR086W                 | STE18         |
| YLR095C                                          | IOC2          | YOL081W                 | IRA2          |
| YLR399C                                          | BDF1          | YNL236W                 | SIN4          |
| YDR378C                                          | LSM6          | YDR254W                 | CHL4          |
| YMR004W                                          | MVP1          | YDR137W                 | RGP1          |
| YOR033C                                          | EXO1          | YKL114C                 | APN1          |
| YLR320W                                          | MMS22         | YBR280C                 | SAF1          |
| YOR035C                                          | SHE4          | YOR036W                 | PEP12         |
| YPR084W                                          | YPR084W       | YGL223C                 | COG1          |
| YDR174W                                          | HMO1          | YJL124C                 | LSM1          |
| YML103C                                          | NUP188        | YOR141C                 | ARP8          |

| Predictions at threshold level 0.75 continued... |               |                         |               |
|--------------------------------------------------|---------------|-------------------------|---------------|
| Gene1 of predicted pair                          |               | Gene2 of predicted pair |               |
| Systematic Name                                  | Standard Name | Systematic Name         | Standard Name |
| YNL243W                                          | SLA2          | YMR109W                 | MYO5          |
| YHR056C                                          | RSC30         | YKR082W                 | NUP133        |
| YDR293C                                          | SSD1          | YMR127C                 | SAS2          |
| YBR290W                                          | BSD2          | YOR023C                 | AHC1          |
| YPR051W                                          | MAK3          | YDL006W                 | PTC1          |
| YNL054W                                          | VAC7          | YAR014C                 | BUD14         |
| YPL037C                                          | EGD1          | YJL004C                 | SYS1          |
| YHR079C                                          | IRE1          | YNR049C                 | MSO1          |
| YPL115C                                          | BEM3          | YAR014C                 | BUD14         |
| YMR199W                                          | CLN1          | YNL079C                 | TPM1          |
| YDR245W                                          | MNN10         | YNL107W                 | YAF9          |
| YFR032C-A                                        | RPL29         | YLR320W                 | MMS22         |
| YGR261C                                          | APL6          | YJR033C                 | RAV1          |
| YBR010W                                          | HHT1          | YDR216W                 | ADR1          |
| YOR332W                                          | VMA4          | YJL183W                 | MNN11         |
| YGL124C                                          | MON1          | YNL107W                 | YAF9          |
| YOR109W                                          | INP53         | YOR327C                 | SNC2          |
| YCR081W                                          | SRB8          | YPL161C                 | BEM4          |
| YOR132W                                          | VPS17         | YDR358W                 | GGA1          |
| YMR026C                                          | PEX12         | YMR133W                 | REC114        |
| YDR254W                                          | CHL4          | YDR310C                 | SUM1          |
| YOR035C                                          | SHE4          | YMR214W                 | SCJ1          |
| YGL025C                                          | PGD1          | YPR120C                 | CLB5          |
| YGR019W                                          | UGA1          | YPR046W                 | MCM16         |
| YOR132W                                          | VPS17         | YAR014C                 | BUD14         |
| YGR159C                                          | NSR1          | YKL041W                 | VPS24         |
| YDR176W                                          | NGG1          | YOL148C                 | SPT20         |
| YBR057C                                          | MUM2          | YKL139W                 | CTK1          |
| YLR452C                                          | SST2          | YML071C                 | COG8          |

| Predictions at threshold level 0.75 continued... |               |                         |               |
|--------------------------------------------------|---------------|-------------------------|---------------|
| Gene1 of predicted pair                          |               | Gene2 of predicted pair |               |
| Systematic Name                                  | Standard Name | Systematic Name         | Standard Name |
| YLR386W                                          | VAC14         | YLR180W                 | SAM1          |
| YOR035C                                          | SHE4          | YOL081W                 | IRA2          |
| YDR320C                                          | SWA2          | YPR051W                 | MAK3          |
| YMR016C                                          | SOK2          | YJR056C                 | YJR056C       |
| YDL080C                                          | THI3          | YLR337C                 | VRP1          |
| YKL139W                                          | CTK1          | YML115C                 | VAN1          |
| YBR042C                                          | CST26         | YOR080W                 | DIA2          |
| YMR109W                                          | MYO5          | YHL002W                 | HSE1          |
| YKL032C                                          | IXR1          | YKL101W                 | HSL1          |
| YGL115W                                          | SNF4          | YPR046W                 | MCM16         |
| YBR171W                                          | SEC66         | YAL002W                 | VPS8          |
| YPR051W                                          | MAK3          | YML071C                 | COG8          |
| YDR137W                                          | RGP1          | YLR398C                 | SKI2          |
| YDR293C                                          | SSD1          | YHL031C                 | GOS1          |
| YML001W                                          | YPT7          | YMR214W                 | SCJ1          |
| YKL032C                                          | IXR1          | YDR076W                 | RAD55         |
| YFR010W                                          | UBP6          | YMR133W                 | REC114        |
| YIL053W                                          | RHR2          | YBR200W                 | BEM1          |
| YOR332W                                          | VMA4          | YMR054W                 | STV1          |
| YPL024W                                          | RMI1          | YCR031C                 | RPS14A        |
| YGL078C                                          | DBP3          | YER116C                 | SLX8          |
| YMR133W                                          | REC114        | YNL041C                 | COG6          |
| YLL007C                                          | YLL007C       | YEL053C                 | MAK10         |
| YJL176C                                          | SWI3          | YLR357W                 | RSC2          |
| YGL066W                                          | SGF73         | YNL229C                 | URE2          |
| YLR150W                                          | STM1          | YBR107C                 | IML3          |
| YJL154C                                          | VPS35         | YDL006W                 | PTC1          |
| YHR161C                                          | YAP1801       | YPL045W                 | VPS16         |
| YBL008W                                          | HIR1          | YDL047W                 | SIT4          |

| Predictions at threshold level 0.75 continued... |               |                         |               |
|--------------------------------------------------|---------------|-------------------------|---------------|
| Gene1 of predicted pair                          |               | Gene2 of predicted pair |               |
| Systematic Name                                  | Standard Name | Systematic Name         | Standard Name |
| YLR320W                                          | MMS22         | YDL077C                 | VAM6          |
| YLR234W                                          | TOP3          | YAR014C                 | BUD14         |
| YBR270C                                          | BIT2          | YPR119W                 | CLB2          |
| YBL008W                                          | HIR1          | YBR089C-A               | NHP6B         |
| YBR073W                                          | RDH54         | YNL248C                 | RPA49         |
| YOR039W                                          | CKB2          | YKL048C                 | ELM1          |
| YHR200W                                          | RPN10         | YER122C                 | GLO3          |
| YDR080W                                          | VPS41         | YEL013W                 | VAC8          |
| YPL115C                                          | BEM3          | YOR358W                 | HAP5          |
| YDR477W                                          | SNF1          | YHR039C-A               | VMA10         |
| YLR102C                                          | APC9          | YDR379W                 | RGA2          |
| YGL153W                                          | PEX14         | YBL101C                 | ECM21         |
| YDR254W                                          | CHL4          | YDL047W                 | SIT4          |
| YMR319C                                          | FET4          | YPR149W                 | NCE102        |
| YKR020W                                          | VPS51         | YOR036W                 | PEP12         |
| YMR029C                                          | FAR8          | YPR119W                 | CLB2          |
| YLR360W                                          | VPS38         | YGR188C                 | BUB1          |
| YJR140C                                          | HIR3          | YDR310C                 | SUM1          |
| YJL136C                                          | RPS21B        | YBR084C-A               | RPL19A        |
| YMR198W                                          | CIK1          | YML016C                 | PPZ1          |
| YFR036W                                          | CDC26         | YPL018W                 | CTF19         |
| YDR378C                                          | LSM6          | YJR135C                 | MCM22         |
| YDL005C                                          | MED2          | YNL031C                 | HHT2          |
| YFR010W                                          | UBP6          | YJL172W                 | CPS1          |
| YHR012W                                          | VPS29         | YOR014W                 | RTS1          |
| YKL010C                                          | UFD4          | YGL153W                 | PEX14         |
| YBR173C                                          | UMP1          | YLR371W                 | ROM2          |
| YDL116W                                          | NUP84         | YLR315W                 | NKP2          |
| YKL092C                                          | BUD2          | YGR152C                 | RSR1          |



| Predictions at threshold level 0.75 continued... |               |                         |               |
|--------------------------------------------------|---------------|-------------------------|---------------|
| Gene1 of predicted pair                          |               | Gene2 of predicted pair |               |
| Systematic Name                                  | Standard Name | Systematic Name         | Standard Name |
| YEL056W                                          | HAT2          | YOL067C                 | RTG1          |
| YLR018C                                          | POM34         | YKL068W                 | NUP100        |
| YMR004W                                          | MVP1          | YPL234C                 | TFP3          |
| YLR371W                                          | ROM2          | YPR046W                 | MCM16         |
| YGL033W                                          | HOP2          | YLR093C                 | NYV1          |
| YLR083C                                          | EMP70         | YGL223C                 | COG1          |
| YHR012W                                          | VPS29         | YDR183W                 | PLP1          |
| YPR154W                                          | PIN3          | YHR114W                 | BZZ1          |
| YNL325C                                          | FIG4          | YBR108W                 | YBR108W       |
| YPL213W                                          | LEA1          | YKL041W                 | VPS24         |
| YLR083C                                          | EMP70         | YGL212W                 | VAM7          |
| YLR234W                                          | TOP3          | YGR108W                 | CLB1          |
| YDR153C                                          | ENT5          | YPR032W                 | SRO7          |
| YLL039C                                          | UBI4          | YGL153W                 | PEX14         |
| YLR337C                                          | VRP1          | YMR032W                 | HOF1          |
| YOL121C                                          | RPS19A        | YDR358W                 | GGA1          |
| YML058W                                          | SML1          | YKL139W                 | CTK1          |
| YAL051W                                          | OAF1          | YOR363C                 | PIP2          |
| YIL002C                                          | INP51         | YDR358W                 | GGA1          |
| YNL291C                                          | MID1          | YEL053C                 | MAK10         |
| YPL024W                                          | RMI1          | YLR381W                 | CTF3          |
| YML071C                                          | COG8          | YBR019C                 | GAL10         |
| YIL076W                                          | SEC28         | YNL058C                 | YNL058C       |
| YGR270W                                          | YTA7          | YPR046W                 | MCM16         |
| YGL147C                                          | RPL9A         | YGL033W                 | HOP2          |
| YER116C                                          | SLX8          | YLR441C                 | RPS1A         |
| YDL161W                                          | ENT1          | YKR020W                 | VPS51         |
| YLR371W                                          | ROM2          | YFR036W                 | CDC26         |
| YBR030W                                          | YBR030W       | YMR311C                 | GLC8          |

| Predictions at threshold level 0.75 continued... |               |                         |               |
|--------------------------------------------------|---------------|-------------------------|---------------|
| Gene1 of predicted pair                          |               | Gene2 of predicted pair |               |
| Systematic Name                                  | Standard Name | Systematic Name         | Standard Name |
| YML095C                                          | RAD10         | YNL116W                 | DMA2          |
| YGL178W                                          | MPT5          | YNL236W                 | SIN4          |
| YBR107C                                          | IML3          | YGL115W                 | SNF4          |
| YNL215W                                          | IES2          | YOL054W                 | PSH1          |
| YKL139W                                          | CTK1          | YGL163C                 | RAD54         |
| YML095C                                          | RAD10         | YDR363W-A               | SEM1          |
| YDR080W                                          | VPS41         | YNL127W                 | FAR11         |
| YEL043W                                          | YEL043W       | YNL051W                 | COG5          |
| YOR069W                                          | VPS5          | YPL195W                 | APL5          |
| YML001W                                          | YPT7          | YJL004C                 | SYS1          |
| YDR283C                                          | GCN2          | YKR026C                 | GCN3          |
| YDR129C                                          | SAC6          | YBR181C                 | RPS6B         |
| YHR156C                                          | LIN1          | YBR280C                 | SAF1          |
| YLR095C                                          | IOC2          | YER122C                 | GLO3          |
| YPL240C                                          | HSP82         | YHL050C                 | YHL050C       |
| YFR010W                                          | UBP6          | YIR005W                 | IST3          |
| YDR137W                                          | RGP1          | YKL041W                 | VPS24         |
| YML071C                                          | COG8          | YKL119C                 | VPH2          |
| YNL218W                                          | MGS1          | YBR082C                 | UBC4          |
| YHR178W                                          | STB5          | YBL051C                 | PIN4          |
| YPL234C                                          | TFP3          | YDL077C                 | VAM6          |
| YNL025C                                          | SSN8          | YPL248C                 | GAL4          |
| YBR131W                                          | CCZ1          | YML001W                 | YPT7          |
| YDR192C                                          | NUP42         | YDR076W                 | RAD55         |
| YMR224C                                          | MRE11         | YEL060C                 | PRB1          |
| YML001W                                          | YPT7          | YPL045W                 | VPS16         |
| YOR195W                                          | SLK19         | YGL031C                 | RPL24A        |
| YGL237C                                          | HAP2          | YBR171W                 | SEC66         |
| YER044C                                          | ERG28         | YPL137C                 | GIP3          |

| Predictions at threshold level 0.75 continued... |               |                         |               |
|--------------------------------------------------|---------------|-------------------------|---------------|
| Gene1 of predicted pair                          |               | Gene2 of predicted pair |               |
| Systematic Name                                  | Standard Name | Systematic Name         | Standard Name |
| YPL174C                                          | NIP100        | YIL033C                 | BCY1          |
| YHR111W                                          | UBA4          | YPR046W                 | MCM16         |
| YHR205W                                          | SCH9          | YEL036C                 | ANP1          |
| YJR135C                                          | MCM22         | YNL116W                 | DMA2          |
| YKL139W                                          | CTK1          | YOL081W                 | IRA2          |
| YBL102W                                          | SFT2          | YJL036W                 | SNX4          |
| YNL307C                                          | MCK1          | YLR398C                 | SKI2          |
| YMR116C                                          | ASC1          | YLR135W                 | SLX4          |
| YPR032W                                          | SRO7          | YOL108C                 | INO4          |
| YOR069W                                          | VPS5          | YPL259C                 | APM1          |
| YOR127W                                          | RGA1          | YAL002W                 | VPS8          |
| YNL069C                                          | RPL16B        | YPL105C                 | YPL105C       |
| YMR095C                                          | SNO1          | YMR153W                 | NUP53         |
| YKL214C                                          | YRA2          | YNL253W                 | TEX1          |
| YDR146C                                          | SWI5          | YER161C                 | SPT2          |
| YLR191W                                          | PEX13         | YDR142C                 | PEX7          |
| YCL027W                                          | FUS1          | YER118C                 | SHO1          |
| YKR024C                                          | DBP7          | YML057W                 | CMP2          |
| YBR200W                                          | BEM1          | YBL051C                 | PIN4          |
| YPL042C                                          | SSN3          | YPR046W                 | MCM16         |
| YER116C                                          | SLX8          | YDL059C                 | RAD59         |
| YER116C                                          | SLX8          | YDL155W                 | CLB3          |
| YNL087W                                          | TCB2          | YOR035C                 | SHE4          |
| YNL069C                                          | RPL16B        | YOL018C                 | TLG2          |
| YPR131C                                          | NAT3          | YMR224C                 | MRE11         |
| YBR194W                                          | SOY1          | YGR014W                 | MSB2          |
| YNL291C                                          | MID1          | YPL195W                 | APL5          |
| YGL212W                                          | VAM7          | YNL307C                 | MCK1          |
| YGL054C                                          | ERV14         | YML001W                 | YPT7          |

| Predictions at threshold level 0.75 continued... |               |                         |               |
|--------------------------------------------------|---------------|-------------------------|---------------|
| Gene1 of predicted pair                          |               | Gene2 of predicted pair |               |
| Systematic Name                                  | Standard Name | Systematic Name         | Standard Name |
| YNL243W                                          | SLA2          | YLL021W                 | SPA2          |
| YMR224C                                          | MRE11         | YGR188C                 | BUB1          |
| YER110C                                          | KAP123        | YGL016W                 | KAP122        |
| YPR040W                                          | TIP41         | YKL048C                 | ELM1          |
| YGL163C                                          | RAD54         | YNL116W                 | DMA2          |
| YOR080W                                          | DIA2          | YPR120C                 | CLB5          |
| YJR056C                                          | YJR056C       | YJL183W                 | MNN11         |
| YBL051C                                          | PIN4          | YOR358W                 | HAP5          |
| YLR396C                                          | VPS33         | YMR231W                 | PEP5          |
| YDR004W                                          | RAD57         | YKR095W                 | MLP1          |
| YDR383C                                          | NKP1          | YFR030W                 | MET10         |
| YDR484W                                          | VPS52         | YOR036W                 | PEP12         |
| YMR095C                                          | SNO1          | YBL025W                 | RRN10         |
| YAL020C                                          | ATS1          | YDR507C                 | GIN4          |
| YNL041C                                          | COG6          | YKR030W                 | GMH1          |
| YDR264C                                          | AKR1          | YKR048C                 | NAP1          |
| YDR245W                                          | MNN10         | YJL183W                 | MNN11         |
| YGL237C                                          | HAP2          | YGR188C                 | BUB1          |
| YLR018C                                          | POM34         | YIL148W                 | RPL40A        |
| YBR107C                                          | IML3          | YDR363W-A               | SEM1          |
| YHR134W                                          | WSS1          | YKL048C                 | ELM1          |
| YLR337C                                          | VRP1          | YER001W                 | MNN1          |
| YCR066W                                          | RAD18         | YJR060W                 | CBF1          |
| YGL066W                                          | SGF73         | YDR264C                 | AKR1          |
| YGL147C                                          | RPL9A         | YOR066W                 | MSA1          |
| YMR055C                                          | BUB2          | YOR038C                 | HIR2          |
| YHL020C                                          | OPI1          | YPL234C                 | TFP3          |
| YKL116C                                          | PRR1          | YOL111C                 | MDY2          |
| YBR200W                                          | BEM1          | YAR014C                 | BUD14         |

| Predictions at threshold level 0.75 continued... |               |                         |               |
|--------------------------------------------------|---------------|-------------------------|---------------|
| Gene1 of predicted pair                          |               | Gene2 of predicted pair |               |
| Systematic Name                                  | Standard Name | Systematic Name         | Standard Name |
| YBR289W                                          | SNF5          | YBR010W                 | HHT1          |
| YLR433C                                          | CNA1          | YIR009W                 | MSL1          |
| YMR055C                                          | BUB2          | YLR233C                 | EST1          |
| YDR320C                                          | SWA2          | YFL026W                 | STE2          |
| YDR422C                                          | SIP1          | YPL256C                 | CLN2          |
| YDR245W                                          | MNN10         | YOR368W                 | RAD17         |
| YNL243W                                          | SLA2          | YBR164C                 | ARL1          |
| YKL135C                                          | APL2          | YDL006W                 | PTC1          |
| YGL163C                                          | RAD54         | YGL151W                 | NUT1          |
| YNL041C                                          | COG6          | YBR280C                 | SAF1          |
| YGL115W                                          | SNF4          | YER027C                 | GAL83         |
| YPR167C                                          | MET16         | YLR093C                 | NYV1          |
| YOR035C                                          | SHE4          | YBR036C                 | CSG2          |
| YJL124C                                          | LSM1          | YML088W                 | UFO1          |
| YDR289C                                          | RTT103        | YOL067C                 | RTG1          |
| YJL140W                                          | RPB4          | YNL107W                 | YAF9          |
| YDR129C                                          | SAC6          | YKL032C                 | IXR1          |
| YDR484W                                          | VPS52         | YFL023W                 | BUD27         |
| YMR055C                                          | BUB2          | YDL155W                 | CLB3          |
| YDL020C                                          | RPN4          | YHR111W                 | UBA4          |
| YDR202C                                          | RAV2          | YCR066W                 | RAD18         |
| YMR199W                                          | CLN1          | YML028W                 | TSA1          |
| YIR005W                                          | IST3          | YML112W                 | CTK3          |
| YCR081W                                          | SRB8          | YEL036C                 | ANP1          |
| YNL069C                                          | RPL16B        | YCR077C                 | PAT1          |
| YLR386W                                          | VAC14         | YMR153W                 | NUP53         |
| YOR112W                                          | CEX1          | YNL297C                 | MON2          |
| YHR167W                                          | THP2          | YLR182W                 | SWI6          |
| YGL200C                                          | EMP24         | YER118C                 | SHO1          |

| Predictions at threshold level 0.75 continued... |               |                         |               |
|--------------------------------------------------|---------------|-------------------------|---------------|
| Gene1 of predicted pair                          |               | Gene2 of predicted pair |               |
| Systematic Name                                  | Standard Name | Systematic Name         | Standard Name |
| YIL053W                                          | RHR2          | YHR200W                 | RPN10         |
| YIL034C                                          | CAP2          | YPL161C                 | BEM4          |
| YPL057C                                          | SUR1          | YBL025W                 | RRN10         |
| YPR036W                                          | VMA13         | YNL238W                 | KEX2          |
| YBL047C                                          | EDE1          | YOR368W                 | RAD17         |
| YLR102C                                          | APC9          | YNL206C                 | RTT106        |
| YPL112C                                          | PEX25         | YPR119W                 | CLB2          |
| YFR010W                                          | UBP6          | YLR320W                 | MMS22         |
| YOR080W                                          | DIA2          | YHR167W                 | THP2          |
| YJL172W                                          | CPS1          | YFR036W                 | CDC26         |
| YDR004W                                          | RAD57         | YGR188C                 | BUB1          |
| YPL024W                                          | RMI1          | YDR245W                 | MNN10         |
| YEL015W                                          | EDC3          | YJR140C                 | HIR3          |
| YPL180W                                          | TCO89         | YML097C                 | VPS9          |
| YGL078C                                          | DBP3          | YJL095W                 | BCK1          |
| YPL042C                                          | SSN3          | YOR156C                 | NFI1          |
| YGR184C                                          | UBR1          | YBR107C                 | IML3          |
| YOR368W                                          | RAD17         | YBR036C                 | CSG2          |
| YLL007C                                          | YLL007C       | YKL048C                 | ELM1          |
| YPL024W                                          | RMI1          | YPL161C                 | BEM4          |
| YLR386W                                          | VAC14         | YDR310C                 | SUM1          |
| YKL139W                                          | CTK1          | YOR141C                 | ARP8          |
| YPL129W                                          | TAF14         | YNR023W                 | SNF12         |
| YMR004W                                          | MVP1          | YKR020W                 | VPS51         |
| YNL058C                                          | YNL058C       | YFR036W                 | CDC26         |
| YBR107C                                          | IML3          | YHR111W                 | UBA4          |
| YBR274W                                          | CHK1          | YGL163C                 | RAD54         |
| YOR270C                                          | VPH1          | YLR452C                 | SST2          |
| YPL253C                                          | VIK1          | YOL081W                 | IRA2          |

| Predictions at threshold level 0.75 continued... |               |                         |               |
|--------------------------------------------------|---------------|-------------------------|---------------|
| Gene1 of predicted pair                          |               | Gene2 of predicted pair |               |
| Systematic Name                                  | Standard Name | Systematic Name         | Standard Name |
| YGL054C                                          | ERV14         | YDR207C                 | UME6          |
| YBL051C                                          | PIN4          | YPL253C                 | VIK1          |
| YGR020C                                          | VMA7          | YCL001W                 | RER1          |
| YPR018W                                          | RLF2          | YJR135C                 | MCM22         |
| YPL057C                                          | SUR1          | YGR071C                 | YGR071C       |
| YKR035W-A                                        | DID2          | YER122C                 | GLO3          |
| YPL024W                                          | RMI1          | YKL126W                 | YPK1          |
| YGR241C                                          | YAP1802       | YCR088W                 | ABP1          |
| YML038C                                          | YMD8          | YLR309C                 | IMH1          |
| YDR484W                                          | VPS52         | YBR019C                 | GAL10         |
| YDL101C                                          | DUN1          | YML095C                 | RAD10         |
| YDR144C                                          | MKC7          | YAR014C                 | BUD14         |
| YGR097W                                          | ASK10         | YPL248C                 | GAL4          |
| YJR032W                                          | CPR7          | YNL107W                 | YAF9          |
| YPR017C                                          | DSS4          | YNL107W                 | YAF9          |
| YHR205W                                          | SCH9          | YOR014W                 | RTS1          |
| YDL116W                                          | NUP84         | YPL246C                 | RBD2          |
| YBL047C                                          | EDE1          | YKL161C                 | YKL161C       |
| YGR261C                                          | APL6          | YPL105C                 | YPL105C       |
| YML071C                                          | COG8          | YNL107W                 | YAF9          |
| YCL037C                                          | SRO9          | YDR207C                 | UME6          |
| YPL001W                                          | HAT1          | YNL031C                 | HHT2          |
| YBR041W                                          | FAT1          | YPL161C                 | BEM4          |
| YOR071C                                          | THI71         | YPR149W                 | NCE102        |
| YNL288W                                          | CAF40         | YDR254W                 | CHL4          |
| YLR095C                                          | IOC2          | YGL147C                 | RPL9A         |
| YKR020W                                          | VPS51         | YPL213W                 | LEA1          |
| YNL032W                                          | SIW14         | YMR311C                 | GLC8          |
| YOR358W                                          | HAP5          | YDR318W                 | MCM21         |

| Predictions at threshold level 0.75 continued... |               |                         |               |
|--------------------------------------------------|---------------|-------------------------|---------------|
| Gene1 of predicted pair                          |               | Gene2 of predicted pair |               |
| Systematic Name                                  | Standard Name | Systematic Name         | Standard Name |
| YGR249W                                          | MGA1          | YPL195W                 | APL5          |
| YBR274W                                          | CHK1          | YJR032W                 | CPR7          |
| YLR240W                                          | VPS34         | YCR088W                 | ABP1          |
| YJL106W                                          | IME2          | YJR094C                 | IME1          |
| YDR378C                                          | LSM6          | YMR038C                 | CCS1          |
| YGL223C                                          | COG1          | YDL006W                 | PTC1          |
| YOR080W                                          | DIA2          | YJR060W                 | CBF1          |
| YHR156C                                          | LIN1          | YLR180W                 | SAM1          |
| YLR386W                                          | VAC14         | YDR358W                 | GGA1          |
| YOR038C                                          | HIR2          | YGL148W                 | ARO2          |
| YGL033W                                          | HOP2          | YNL041C                 | COG6          |
| YER162C                                          | RAD4          | YER122C                 | GLO3          |
| YJL006C                                          | CTK2          | YNL116W                 | DMA2          |
| YOR080W                                          | DIA2          | YLR370C                 | ARC18         |
| YGR019W                                          | UGA1          | YBR108W                 | YBR108W       |
| YHR081W                                          | LRP1          | YER122C                 | GLO3          |
| YOR005C                                          | DNL4          | YCR014C                 | POL4          |
| YNL087W                                          | TCB2          | YOR290C                 | SNF2          |
| YPR084W                                          | YPR084W       | YCL037C                 | SRO9          |
| YLR079W                                          | SIC1          | YML112W                 | CTK3          |
| YBL102W                                          | SFT2          | YAL002W                 | VPS8          |
| YDR129C                                          | SAC6          | YBR171W                 | SEC66         |
| YLR079W                                          | SIC1          | YMR179W                 | SPT21         |
| YNL206C                                          | RTT106        | YOR275C                 | RIM20         |
| YDL244W                                          | THI13         | YPL240C                 | HSP82         |
| YML095C                                          | RAD10         | YHR010W                 | RPL27A        |
| YLR090W                                          | XDJ1          | YBR030W                 | YBR030W       |
| YBR217W                                          | ATG12         | YJL095W                 | BCK1          |
| YML115C                                          | VAN1          | YER040W                 | GLN3          |



| Predictions at threshold level 0.75 continued... |               |                         |               |
|--------------------------------------------------|---------------|-------------------------|---------------|
| Gene1 of predicted pair                          |               | Gene2 of predicted pair |               |
| Systematic Name                                  | Standard Name | Systematic Name         | Standard Name |
| YLR360W                                          | VPS38         | YDR254W                 | CHL4          |
| YNL094W                                          | APP1          | YKR030W                 | GMH1          |
| YDR363W-A                                        | SEM1          | YAL002W                 | VPS8          |
| YBR131W                                          | CCZ1          | YPL089C                 | RLM1          |
| YKR061W                                          | KTR2          | YJR135C                 | MCM22         |
| YFR024C-A                                        | LSB3          | YKR030W                 | GMH1          |
| YPL024W                                          | RMI1          | YGL163C                 | RAD54         |
| YER019C-A                                        | SBH2          | YDL006W                 | PTC1          |
| YPL096C-A                                        | ERI1          | YJL095W                 | BCK1          |
| YMR172W                                          | HOT1          | YOL067C                 | RTG1          |
| YJL176C                                          | SWI3          | YBL072C                 | RPS8A         |
| YML038C                                          | YMD8          | YDL186W                 | YDL186W       |
| YMR179W                                          | SPT21         | YJR135C                 | MCM22         |
| YBR107C                                          | IML3          | YAL002W                 | VPS8          |
| YLR386W                                          | VAC14         | YAL002W                 | VPS8          |
| YGL147C                                          | RPL9A         | YER044C                 | ERG28         |
| YEL044W                                          | IES6          | YBL072C                 | RPS8A         |
| YNL058C                                          | YNL058C       | YER139C                 | YER139C       |
| YPL022W                                          | RAD1          | YLR410W                 | VIP1          |
| YJR024C                                          | MDE1          | YJR059W                 | PTK2          |
| YGL078C                                          | DBP3          | YMR133W                 | REC114        |
| YLR320W                                          | MMS22         | YPR030W                 | CSR2          |
| YDR004W                                          | RAD57         | YJL124C                 | LSM1          |
| YMR224C                                          | MRE11         | YNL307C                 | MCK1          |
| YLR079W                                          | SIC1          | YDL047W                 | SIT4          |
| YBR217W                                          | ATG12         | YER122C                 | GLO3          |
| YNL166C                                          | BNI5          | YPL018W                 | CTF19         |
| YBR200W                                          | BEM1          | YMR230W                 | RPS10B        |
| YMR054W                                          | STV1          | YPL120W                 | VPS30         |

| Predictions at threshold level 0.75 continued... |               |                         |               |
|--------------------------------------------------|---------------|-------------------------|---------------|
| Gene1 of predicted pair                          |               | Gene2 of predicted pair |               |
| Systematic Name                                  | Standard Name | Systematic Name         | Standard Name |
| YGL212W                                          | VAM7          | YER162C                 | RAD4          |
| YGR249W                                          | MGA1          | YDR477W                 | SNF1          |
| YDR477W                                          | SNF1          | YEL053C                 | MAK10         |
| YDR395W                                          | SXM1          | YBL079W                 | NUP170        |
| YGL161C                                          | YIP5          | YDR310C                 | SUM1          |
| YDR254W                                          | CHL4          | YOL067C                 | RTG1          |
| YBR131W                                          | CCZ1          | YDL192W                 | ARF1          |
| YMR202W                                          | ERG2          | YDR507C                 | GIN4          |
| YDR289C                                          | RTT103        | YDR155C                 | CPR1          |
| YLR090W                                          | XDJ1          | YBR217W                 | ATG12         |
| YNL116W                                          | DMA2          | YGL252C                 | RTG2          |
| YDR137W                                          | RGP1          | YEL013W                 | VAC8          |
| YBL017C                                          | PEP1          | YKR020W                 | VPS51         |
| YGL135W                                          | RPL1B         | YLR360W                 | VPS38         |
| YLR410W                                          | VIP1          | YFR036W                 | CDC26         |
| YML115C                                          | VAN1          | YBR041W                 | FAT1          |
| YBR171W                                          | SEC66         | YEL053C                 | MAK10         |
| YGL060W                                          | YBP2          | YJL006C                 | CTK2          |
| YPL042C                                          | SSN3          | YJL089W                 | SIP4          |
| YLR399C                                          | BDF1          | YOR141C                 | ARP8          |
| YGL250W                                          | RMR1          | YDR310C                 | SUM1          |
| YDL184C                                          | RPL41A        | YPR036W                 | VMA13         |
| YOR035C                                          | SHE4          | YBL072C                 | RPS8A         |
| YOR337W                                          | TEA1          | YDR261C                 | EXG2          |
| YGR105W                                          | VMA21         | YKL080W                 | VMA5          |
| YDL020C                                          | RPN4          | YIL008W                 | URM1          |
| YNL307C                                          | MCK1          | YGR135W                 | PRE9          |
| YBR200W                                          | BEM1          | YLR425W                 | TUS1          |
| YLR447C                                          | VMA6          | YPL234C                 | TFP3          |

| Predictions at threshold level 0.75 continued... |               |                         |               |
|--------------------------------------------------|---------------|-------------------------|---------------|
| Gene1 of predicted pair                          |               | Gene2 of predicted pair |               |
| Systematic Name                                  | Standard Name | Systematic Name         | Standard Name |
| YDR309C                                          | GIC2          | YNL116W                 | DMA2          |
| YNL243W                                          | SLA2          | YNL020C                 | ARK1          |
| YGR072W                                          | UPF3          | YDR153C                 | ENT5          |
| YKL116C                                          | PRR1          | YER162C                 | RAD4          |
| YDL116W                                          | NUP84         | YKL117W                 | SBA1          |
| YEL009C                                          | GCN4          | YOR298C-A               | MBF1          |
| YOR127W                                          | RGA1          | YOL018C                 | TLG2          |
| YOR337W                                          | TEA1          | YLR370C                 | ARC18         |
| YLR370C                                          | ARC18         | YPR119W                 | CLB2          |
| YBR215W                                          | HPC2          | YDR440W                 | DOT1          |
| YPL045W                                          | VPS16         | YGL198W                 | YIP4          |
| YKR072C                                          | SIS2          | YOR080W                 | DIA2          |
| YGR108W                                          | CLB1          | YEL056W                 | HAT2          |
| YOR132W                                          | VPS17         | YJR058C                 | APS2          |
| YDR440W                                          | DOT1          | YDR155C                 | CPR1          |
| YOR358W                                          | HAP5          | YGL253W                 | HXK2          |
| YPR046W                                          | MCM16         | YOR035C                 | SHE4          |
| YDL116W                                          | NUP84         | YJL006C                 | CTK2          |
| YOR069W                                          | VPS5          | YDL006W                 | PTC1          |
| YGL223C                                          | COG1          | YML001W                 | YPT7          |
| YBR217W                                          | ATG12         | YPL137C                 | GIP3          |
| YPL057C                                          | SUR1          | YHR013C                 | ARD1          |
| YNL199C                                          | GCR2          | YKL068W                 | NUP100        |
| YGR217W                                          | CCH1          | YGR135W                 | PRE9          |
| YFR010W                                          | UBP6          | YNL117W                 | MLS1          |
| YPL042C                                          | SSN3          | YDR289C                 | RTT103        |
| YGR270W                                          | YTA7          | YHR115C                 | DMA1          |
| YBR194W                                          | SOY1          | YLR058C                 | SHM2          |
| YOR270C                                          | VPH1          | YDL192W                 | ARF1          |

| Predictions at threshold level 0.75 continued... |               |                         |               |
|--------------------------------------------------|---------------|-------------------------|---------------|
| Gene1 of predicted pair                          |               | Gene2 of predicted pair |               |
| Systematic Name                                  | Standard Name | Systematic Name         | Standard Name |
| YFL023W                                          | BUD27         | YPR036W                 | VMA13         |
| YGL241W                                          | KAP114        | YBR010W                 | HHT1          |
| YKL101W                                          | HSL1          | YGR188C                 | BUB1          |
| YBL087C                                          | RPL23A        | YHR115C                 | DMA1          |
| YAR014C                                          | BUD14         | YER122C                 | GLO3          |
| YPL161C                                          | BEM4          | YDR289C                 | RTT103        |
| YNL259C                                          | ATX1          | YDR270W                 | CCC2          |
| YML095C                                          | RAD10         | YJR090C                 | GRR1          |
| YOR001W                                          | RRP6          | YGL174W                 | BUD13         |
| YPL253C                                          | VIK1          | YPL018W                 | CTF19         |
| YBR217W                                          | ATG12         | YNL076W                 | MKS1          |
| YER110C                                          | KAP123        | YPR051W                 | MAK3          |
| YMR055C                                          | BUB2          | YOR043W                 | WHI2          |
| YJR084W                                          | CSN12         | YER040W                 | GLN3          |
| YMR224C                                          | MRE11         | YHR013C                 | ARD1          |
| YBL058W                                          | SHP1          | YER162C                 | RAD4          |
| YCR065W                                          | HCM1          | YGL031C                 | RPL24A        |
| YBR108W                                          | YBR108W       | YOL111C                 | MDY2          |
| YER120W                                          | SCS2          | YDR310C                 | SUM1          |
| YLR320W                                          | MMS22         | YHR039C-A               | VMA10         |
| YGR135W                                          | PRE9          | YDR318W                 | MCM21         |
| YML001W                                          | YPT7          | YNL107W                 | YAF9          |
| YIL076W                                          | SEC28         | YLR441C                 | RPS1A         |
| YLR337C                                          | VRP1          | YLR234W                 | TOP3          |
| YBR228W                                          | SLX1          | YCL037C                 | SRO9          |
| YGR249W                                          | MGA1          | YER139C                 | YER139C       |
| YOR033C                                          | EXO1          | YGL175C                 | SAE2          |
| YIL053W                                          | RHR2          | YMR133W                 | REC114        |
| YNL307C                                          | MCK1          | YFR030W                 | MET10         |

| Predictions at threshold level 0.75 continued... |               |                         |               |
|--------------------------------------------------|---------------|-------------------------|---------------|
| Gene1 of predicted pair                          |               | Gene2 of predicted pair |               |
| Systematic Name                                  | Standard Name | Systematic Name         | Standard Name |
| YCR086W                                          | CSM1          | YBR036C                 | CSG2          |
| YLR337C                                          | VRP1          | YBR114W                 | RAD16         |
| YPL057C                                          | SUR1          | YOR038C                 | HIR2          |
| YML115C                                          | VAN1          | YOL081W                 | IRA2          |
| YGL095C                                          | VPS45         | YAL030W                 | SNC1          |
| YBR057C                                          | MUM2          | YLR032W                 | RAD5          |
| YJL187C                                          | SWE1          | YDR207C                 | UME6          |
| YGR072W                                          | UPF3          | YLR135W                 | SLX4          |
| YGR270W                                          | YTA7          | YCR077C                 | PAT1          |
| YOR127W                                          | RGA1          | YMR054W                 | STV1          |
| YDR080W                                          | VPS41         | YJR033C                 | RAV1          |
| YIL159W                                          | BNR1          | YJR056C                 | YJR056C       |
| YGL078C                                          | DBP3          | YJR056C                 | YJR056C       |
| YOR145C                                          | PNO1          | YOR078W                 | BUD21         |
| YKR001C                                          | VPS1          | YOR368W                 | RAD17         |
| YDL116W                                          | NUP84         | YDR156W                 | RPA14         |
| YLR399C                                          | BDF1          | YNL248C                 | RPA49         |
| YML103C                                          | NUP188        | YKL110C                 | KTI12         |
| YMR198W                                          | CIK1          | YAL002W                 | VPS8          |
| YPR101W                                          | SNT309        | YJR050W                 | ISY1          |
| YKR072C                                          | SIS2          | YMR038C                 | CCS1          |
| YDR225W                                          | HTA1          | YMR153W                 | NUP53         |
| YLR234W                                          | TOP3          | YML016C                 | PPZ1          |
| YIL008W                                          | URM1          | YGL163C                 | RAD54         |
| YOR069W                                          | VPS5          | YDR310C                 | SUM1          |
| YNL291C                                          | MID1          | YPL161C                 | BEM4          |
| YMR224C                                          | MRE11         | YKR001C                 | VPS1          |
| YLR452C                                          | SST2          | YER122C                 | GLO3          |
| YDR176W                                          | NGG1          | YBL005W                 | PDR3          |

| Predictions at threshold level 0.75 continued... |               |                         |               |
|--------------------------------------------------|---------------|-------------------------|---------------|
| Gene1 of predicted pair                          |               | Gene2 of predicted pair |               |
| Systematic Name                                  | Standard Name | Systematic Name         | Standard Name |
| YGL147C                                          | RPL9A         | YDL083C                 | RPS16B        |
| YFR010W                                          | UBP6          | YBR200W                 | BEM1          |
| YBL019W                                          | APN2          | YMR055C                 | BUB2          |
| YGR261C                                          | APL6          | YER162C                 | RAD4          |
| YDR484W                                          | VPS52         | YJR084W                 | CSN12         |
| YDR097C                                          | MSH6          | YGL100W                 | SEH1          |
| YMR224C                                          | MRE11         | YMR116C                 | ASC1          |
| YBR030W                                          | YBR030W       | YJR084W                 | CSN12         |
| YNL329C                                          | PEX6          | YKL041W                 | VPS24         |
| YPL105C                                          | YPL105C       | YKR030W                 | GMH1          |
| YGR261C                                          | APL6          | YLR309C                 | IMH1          |
| YDR335W                                          | MSN5          | YMR055C                 | BUB2          |
| YAL020C                                          | ATS1          | YKL048C                 | ELM1          |
| YJL154C                                          | VPS35         | YIL008W                 | URM1          |
| YLR094C                                          | GIS3          | YJL095W                 | BCK1          |
| YDR202C                                          | RAV2          | YDL192W                 | ARF1          |
| YPL105C                                          | YPL105C       | YKR020W                 | VPS51         |
| YKL139W                                          | CTK1          | YDR310C                 | SUM1          |
| YBR290W                                          | BSD2          | YJL095W                 | BCK1          |
| YKR072C                                          | SIS2          | YHR010W                 | RPL27A        |
| YOR132W                                          | VPS17         | YJL190C                 | RPS22A        |
| YNL016W                                          | PUB1          | YMR038C                 | CCS1          |
| YNL025C                                          | SSN8          | YNL236W                 | SIN4          |
| YKL032C                                          | IXR1          | YDR310C                 | SUM1          |
| YFL023W                                          | BUD27         | YGL124C                 | MON1          |
| YGR129W                                          | SYF2          | YKL074C                 | MUD2          |
| YKL007W                                          | CAP1          | YLR216C                 | CPR6          |
| YNL248C                                          | RPA49         | YDR289C                 | RTT103        |
| YGL253W                                          | HXK2          | YAL002W                 | VPS8          |

| Predictions at threshold level 0.75 continued... |               |                         |               |
|--------------------------------------------------|---------------|-------------------------|---------------|
| Gene1 of predicted pair                          |               | Gene2 of predicted pair |               |
| Systematic Name                                  | Standard Name | Systematic Name         | Standard Name |
| YDR477W                                          | SNF1          | YDR456W                 | NHX1          |
| YPL050C                                          | MNN9          | YNL041C                 | COG6          |
| YJR135C                                          | MCM22         | YOR014W                 | RTS1          |
| YGR072W                                          | UPF3          | YBL102W                 | SFT2          |
| YOR069W                                          | VPS5          | YCR066W                 | RAD18         |
| YMR142C                                          | RPL13B        | YHR081W                 | LRP1          |
| YJL124C                                          | LSM1          | YDR289C                 | RTT103        |
| YNL135C                                          | FPR1          | YBL103C                 | RTG3          |
| YOR156C                                          | NFI1          | YPL057C                 | SUR1          |
| YML095C                                          | RAD10         | YGL031C                 | RPL24A        |
| YMR153W                                          | NUP53         | YBL103C                 | RTG3          |
| YNL307C                                          | MCK1          | YJL095W                 | BCK1          |
| YBL102W                                          | SFT2          | YDR207C                 | UME6          |
| YLR234W                                          | TOP3          | YGL019W                 | CKB1          |
| YPL246C                                          | RBD2          | YHR016C                 | YSC84         |
| YLR399C                                          | BDF1          | YNL107W                 | YAF9          |
| YNL215W                                          | IES2          | YGL163C                 | RAD54         |
| YCR034W                                          | FEN1          | YML016C                 | PPZ1          |
| YBR173C                                          | UMP1          | YHR081W                 | LRP1          |
| YPL050C                                          | MNN9          | YMR109W                 | MYO5          |
| YML071C                                          | COG8          | YER139C                 | YER139C       |
| YDR165W                                          | TRM82         | YDL201W                 | TRM8          |
| YGL135W                                          | RPL1B         | YML115C                 | VAN1          |
| YHR060W                                          | VMA22         | YPL234C                 | TFP3          |
| YDR137W                                          | RGP1          | YOR124C                 | UBP2          |
| YMR224C                                          | MRE11         | YLR288C                 | MEC3          |
| YKL025C                                          | PAN3          | YEL053C                 | MAK10         |
| YGR072W                                          | UPF3          | YOR327C                 | SNC2          |
| YKR099W                                          | BAS1          | YKL048C                 | ELM1          |

| Predictions at threshold level 0.75 continued... |               |                         |               |
|--------------------------------------------------|---------------|-------------------------|---------------|
| Gene1 of predicted pair                          |               | Gene2 of predicted pair |               |
| Systematic Name                                  | Standard Name | Systematic Name         | Standard Name |
| YLR192C                                          | HCR1          | YCR053W                 | THR4          |
| YCR020C-A                                        | MAK31         | YMR054W                 | STV1          |
| YER162C                                          | RAD4          | YLR180W                 | SAM1          |
| YJR135C                                          | MCM22         | YHR114W                 | BZZ1          |
| YLR119W                                          | SRN2          | YNL032W                 | SIW14         |
| YDR309C                                          | GIC2          | YDR227W                 | SIR4          |
| YLR083C                                          | EMP70         | YER122C                 | GLO3          |
| YMR142C                                          | RPL13B        | YDL077C                 | VAM6          |
| YPL240C                                          | HSP82         | YJL103C                 | GSM1          |
| YBL087C                                          | RPL23A        | YNL116W                 | DMA2          |
| YJR140C                                          | HIR3          | YCR077C                 | PAT1          |
| YKL130C                                          | SHE2          | YKL185W                 | ASH1          |
| YDL213C                                          | NOP6          | YOR078W                 | BUD21         |
| YBR200W                                          | BEM1          | YMR109W                 | MYO5          |
| YML016C                                          | PPZ1          | YPL256C                 | CLN2          |
| YKL048C                                          | ELM1          | YHR060W                 | VMA22         |
| YDR155C                                          | CPR1          | YPL018W                 | CTF19         |
| YPL129W                                          | TAF14         | YLR176C                 | RFX1          |
| YDR320C                                          | SWA2          | YDL226C                 | GCS1          |
| YLR095C                                          | IOC2          | YOR270C                 | VPH1          |
| YGR270W                                          | YTA7          | YKL160W                 | ELF1          |
| YIL159W                                          | BNR1          | YEL053C                 | MAK10         |
| YJR059W                                          | PTK2          | YMR164C                 | MSS11         |
| YPL195W                                          | APL5          | YEL013W                 | VAC8          |
| YLR386W                                          | VAC14         | YKR035W-A               | DID2          |
| YDR080W                                          | VPS41         | YGR105W                 | VMA21         |
| YGL054C                                          | ERV14         | YGR105W                 | VMA21         |
| YDR260C                                          | SWM1          | YPL018W                 | CTF19         |
| YBL007C                                          | SLA1          | YGL095C                 | VPS45         |



| Predictions at threshold level 0.75 continued... |               |                         |               |
|--------------------------------------------------|---------------|-------------------------|---------------|
| Gene1 of predicted pair                          |               | Gene2 of predicted pair |               |
| Systematic Name                                  | Standard Name | Systematic Name         | Standard Name |
| YML095C                                          | RAD10         | YLR352W                 | YLR352W       |
| YBR200W                                          | BEM1          | YBR171W                 | SEC66         |
| YGL087C                                          | MMS2          | YNL166C                 | BNI5          |
| YFL023W                                          | BUD27         | YPL137C                 | GIP3          |
| YLR313C                                          | SPH1          | YBR082C                 | UBC4          |
| YBR138C                                          | YBR138C       | YGR223C                 | HSV2          |
| YKR048C                                          | NAP1          | YLR425W                 | TUS1          |
| YCR077C                                          | PAT1          | YGR152C                 | RSR1          |
| YBR127C                                          | VMA2          | YMR054W                 | STV1          |
| YPL256C                                          | CLN2          | YKL101W                 | HSL1          |
| YAL024C                                          | LTE1          | YHR200W                 | RPN10         |
| YOR290C                                          | SNF2          | YML071C                 | COG8          |
| YMR133W                                          | REC114        | YBL025W                 | RRN10         |
| YJR135C                                          | MCM22         | YDR289C                 | RTT103        |
| YNL032W                                          | SIW14         | YHR200W                 | RPN10         |
| YBR215W                                          | HPC2          | YCR086W                 | CSM1          |
| YPR018W                                          | RLF2          | YMR038C                 | CCS1          |
| YDR202C                                          | RAV2          | YDR207C                 | UME6          |
| YER162C                                          | RAD4          | YLR093C                 | NYV1          |
| YGL223C                                          | COG1          | YEL036C                 | ANP1          |
| YHR013C                                          | ARD1          | YAR014C                 | BUD14         |
| YKL126W                                          | YPK1          | YOL121C                 | RPS19A        |
| YNL307C                                          | MCK1          | YEL053C                 | MAK10         |
| YAL024C                                          | LTE1          | YOL111C                 | MDY2          |
| YNL325C                                          | FIG4          | YPL057C                 | SUR1          |
| YGL087C                                          | MMS2          | YAR014C                 | BUD14         |
| YLR386W                                          | VAC14         | YNL076W                 | MKS1          |
| YGL066W                                          | SGF73         | YDR254W                 | CHL4          |
| YGL115W                                          | SNF4          | YHR081W                 | LRP1          |

| Predictions at threshold level 0.75 continued... |               |                         |               |
|--------------------------------------------------|---------------|-------------------------|---------------|
| Gene1 of predicted pair                          |               | Gene2 of predicted pair |               |
| Systematic Name                                  | Standard Name | Systematic Name         | Standard Name |
| YGR152C                                          | RSR1          | YNL090W                 | RHO2          |
| YLR386W                                          | VAC14         | YDR261C                 | EXG2          |
| YDR358W                                          | GGA1          | YOR035C                 | SHE4          |
| YEL053C                                          | MAK10         | YLR309C                 | IMH1          |
| YLR090W                                          | XDJ1          | YDR358W                 | GGA1          |
| YDR320C                                          | SWA2          | YML038C                 | YMD8          |
| YHR134W                                          | WSS1          | YOR080W                 | DIA2          |
| YNL004W                                          | HRB1          | YCL011C                 | GBP2          |
| YDR363W-A                                        | SEM1          | YJR035W                 | RAD26         |
| YBR107C                                          | IML3          | YDL155W                 | CLB3          |
| YLR090W                                          | XDJ1          | YDR137W                 | RGP1          |
| YOR368W                                          | RAD17         | YKL114C                 | APN1          |
| YDR004W                                          | RAD57         | YBR195C                 | MSI1          |
| YKL025C                                          | PAN3          | YIL034C                 | CAP2          |
| YJR135C                                          | MCM22         | YGR135W                 | PRE9          |
| YPR051W                                          | MAK3          | YJR135C                 | MCM22         |
| YOR069W                                          | VPS5          | YOR106W                 | VAM3          |
| YOR195W                                          | SLK19         | YJR005W                 | APL1          |
| YOL111C                                          | MDY2          | YJR084W                 | CSN12         |
| YGL237C                                          | HAP2          | YJL190C                 | RPS22A        |
| YJR140C                                          | HIR3          | YMR055C                 | BUB2          |
| YNL206C                                          | RTT106        | YOR141C                 | ARP8          |
| YKL160W                                          | ELF1          | YHR167W                 | THP2          |
| YER116C                                          | SLX8          | YAL009W                 | SPO7          |
| YJL036W                                          | SNX4          | YPR119W                 | CLB2          |
| YGL161C                                          | YIP5          | YNL107W                 | YAF9          |
| YGL033W                                          | HOP2          | YER040W                 | GLN3          |
| YEL053C                                          | MAK10         | YJL004C                 | SYS1          |
| YHR152W                                          | SPO12         | YDL047W                 | SIT4          |

| Predictions at threshold level 0.75 continued... |               |                         |               |
|--------------------------------------------------|---------------|-------------------------|---------------|
| Gene1 of predicted pair                          |               | Gene2 of predicted pair |               |
| Systematic Name                                  | Standard Name | Systematic Name         | Standard Name |
| YGR239C                                          | PEX21         | YGL153W                 | PEX14         |
| YDR293C                                          | SSD1          | YPR120C                 | CLB5          |
| YOR337W                                          | TEA1          | YHR039C-A               | VMA10         |
| YHR200W                                          | RPN10         | YPL137C                 | GIP3          |
| YLR452C                                          | SST2          | YPR046W                 | MCM16         |
| YBL051C                                          | PIN4          | YML016C                 | PPZ1          |
| YLR192C                                          | HCR1          | YLR441C                 | RPS1A         |
| YGL066W                                          | SGF73         | YDR379W                 | RGA2          |
| YIL053W                                          | RHR2          | YMR230W                 | RPS10B        |
| YMR116C                                          | ASC1          | YBL079W                 | NUP170        |
| YPR084W                                          | YPR084W       | YPL057C                 | SUR1          |
| YJL124C                                          | LSM1          | YGL031C                 | RPL24A        |
| YMR127C                                          | SAS2          | YDR183W                 | PLP1          |
| YLR095C                                          | IOC2          | YNL307C                 | MCK1          |
| YMR224C                                          | MRE11         | YEL053C                 | MAK10         |
| YPL024W                                          | RMI1          | YPL001W                 | HAT1          |
| YOR106W                                          | VAM3          | YDL006W                 | PTC1          |
| YHL031C                                          | GOS1          | YDR080W                 | VPS41         |
| YOR270C                                          | VPH1          | YML071C                 | COG8          |
| YDR260C                                          | SWM1          | YKL101W                 | HSL1          |
| YGR133W                                          | PEX4          | YML071C                 | COG8          |
| YGL151W                                          | NUT1          | YAL002W                 | VPS8          |
| YLR119W                                          | SRN2          | YEL060C                 | PRB1          |
| YGL147C                                          | RPL9A         | YBR171W                 | SEC66         |
| YDR293C                                          | SSD1          | YNL238W                 | KEX2          |
| YPL137C                                          | GIP3          | YDR207C                 | UME6          |
| YIL034C                                          | CAP2          | YAL002W                 | VPS8          |
| YFR036W                                          | CDC26         | YER122C                 | GLO3          |
| YGL087C                                          | MMS2          | YMR109W                 | MYO5          |

| Predictions at threshold level 0.75 continued... |               |                         |               |
|--------------------------------------------------|---------------|-------------------------|---------------|
| Gene1 of predicted pair                          |               | Gene2 of predicted pair |               |
| Systematic Name                                  | Standard Name | Systematic Name         | Standard Name |
| YCL037C                                          | SRO9          | YNR032W                 | PPG1          |
| YBR127C                                          | VMA2          | YEL027W                 | CUP5          |
| YMR055C                                          | BUB2          | YHR012W                 | VPS29         |
| YLR386W                                          | VAC14         | YOR023C                 | AHC1          |
| YGR108W                                          | CLB1          | YDR363W-A               | SEM1          |
| YNL054W                                          | VAC7          | YHR115C                 | DMA1          |
| YHR200W                                          | RPN10         | YJR084W                 | CSN12         |
| YML001W                                          | YPT7          | YHR012W                 | VPS29         |
| YGL124C                                          | MON1          | YGR188C                 | BUB1          |
| YLL042C                                          | ATG10         | YPL149W                 | ATG5          |
| YBL047C                                          | EDE1          | YDL047W                 | SIT4          |
| YBR260C                                          | RGD1          | YOR014W                 | RTS1          |
| YLR192C                                          | HCR1          | YKL139W                 | CTK1          |
| YIR009W                                          | MSL1          | YGR188C                 | BUB1          |
| YKR057W                                          | RPS21A        | YBL087C                 | RPL23A        |
| YNL243W                                          | SLA2          | YMR294W                 | JNM1          |
| YNL288W                                          | CAF40         | YIL008W                 | URM1          |
| YCR086W                                          | CSM1          | YDR289C                 | RTT103        |
| YLR102C                                          | APC9          | YKR048C                 | NAP1          |
| YPL120W                                          | VPS30         | YKR030W                 | GMH1          |
| YJR032W                                          | CPR7          | YGR188C                 | BUB1          |
| YKL181W                                          | PRS1          | YPR119W                 | CLB2          |
| YDR225W                                          | HTA1          | YGL163C                 | RAD54         |
| YPR135W                                          | CTF4          | YBR089C-A               | NHP6B         |
| YEL044W                                          | IES6          | YGL212W                 | VAM7          |
| YFR010W                                          | UBP6          | YDR076W                 | RAD55         |
| YNL297C                                          | MON2          | YAL002W                 | VPS8          |
| YOR290C                                          | SNF2          | YFR034C                 | PHO4          |
| YLR360W                                          | VPS38         | YER120W                 | SCS2          |

| Predictions at threshold level 0.75 continued... |               |                         |               |
|--------------------------------------------------|---------------|-------------------------|---------------|
| Gene1 of predicted pair                          |               | Gene2 of predicted pair |               |
| Systematic Name                                  | Standard Name | Systematic Name         | Standard Name |
| YDR253C                                          | MET32         | YGR285C                 | ZUO1          |
| YNL058C                                          | YNL058C       | YER040W                 | GLN3          |
| YIL053W                                          | RHR2          | YLR320W                 | MMS22         |
| YMR026C                                          | PEX12         | YOR270C                 | VPH1          |
| YGL087C                                          | MMS2          | YDR310C                 | SUM1          |
| YOR106W                                          | VAM3          | YHR039C-A               | VMA10         |
| YJR059W                                          | PTK2          | YKL117W                 | SBA1          |
| YLR150W                                          | STM1          | YHR013C                 | ARD1          |
| YPL022W                                          | RAD1          | YDR318W                 | MCM21         |
| YGR104C                                          | SRB5          | YDR440W                 | DOT1          |
| YHR060W                                          | VMA22         | YHR081W                 | LRP1          |
| YLR095C                                          | IOC2          | YDL223C                 | HBT1          |
| YPL195W                                          | APL5          | YCR053W                 | THR4          |
| YIR005W                                          | IST3          | YPR046W                 | MCM16         |
| YJL036W                                          | SNX4          | YAL030W                 | SNC1          |
| YPL042C                                          | SSN3          | YOL091W                 | SPO21         |
| YMR109W                                          | MYO5          | YKL213C                 | DOA1          |
| YDR092W                                          | UBC13         | YLR032W                 | RAD5          |
| YMR153W                                          | NUP53         | YNL238W                 | KEX2          |
| YKL161C                                          | YKL161C       | YLR425W                 | TUS1          |
| YJL124C                                          | LSM1          | YOR312C                 | RPL20B        |
| YER001W                                          | MNN1          | YKL041W                 | VPS24         |
| YIL159W                                          | BNR1          | YMR026C                 | PEX12         |
| YDR379W                                          | RGA2          | YBL087C                 | RPL23A        |
| YBR228W                                          | SLX1          | YBR073W                 | RDH54         |
| YLR119W                                          | SRN2          | YPL037C                 | EGD1          |
| YCR020C-A                                        | MAK31         | YPL161C                 | BEM4          |
| YMR273C                                          | ZDS1          | YHR061C                 | GIC1          |
| YFR036W                                          | CDC26         | YOR327C                 | SNC2          |

| Predictions at threshold level 0.75 continued... |               |                         |               |
|--------------------------------------------------|---------------|-------------------------|---------------|
| Gene1 of predicted pair                          |               | Gene2 of predicted pair |               |
| Systematic Name                                  | Standard Name | Systematic Name         | Standard Name |
| YGL153W                                          | PEX14         | YGL200C                 | EMP24         |
| YCL037C                                          | SRO9          | YEL051W                 | VMA8          |
| YBL047C                                          | EDE1          | YLR182W                 | SWI6          |
| YMR153W                                          | NUP53         | YNL076W                 | MKS1          |
| YPL234C                                          | TFP3          | YOR327C                 | SNC2          |
| YDL184C                                          | RPL41A        | YPR046W                 | MCM16         |
| YHR178W                                          | STB5          | YOR038C                 | HIR2          |
| YGL163C                                          | RAD54         | YDR076W                 | RAD55         |
| YKR048C                                          | NAP1          | YNL116W                 | DMA2          |
| YAL024C                                          | LTE1          | YOR368W                 | RAD17         |
| YBR030W                                          | YBR030W       | YOR327C                 | SNC2          |
| YOR132W                                          | VPS17         | YMR054W                 | STV1          |
| YGR159C                                          | NSR1          | YGL200C                 | EMP24         |
| YNL031C                                          | HHT2          | YDR071C                 | PAA1          |
| YBL103C                                          | RTG3          | YNL058C                 | YNL058C       |
| YPL161C                                          | BEM4          | YBL087C                 | RPL23A        |
| YER116C                                          | SLX8          | YKR035W-A               | DID2          |
| YPR017C                                          | DSS4          | YEL051W                 | VMA8          |
| YAL024C                                          | LTE1          | YEL060C                 | PRB1          |
| YDR144C                                          | MKC7          | YBR114W                 | RAD16         |
| YMR198W                                          | CIK1          | YJL127C                 | SPT10         |
| YER087C-B                                        | SBH1          | YBR279W                 | PAF1          |
| YER044C                                          | ERG28         | YMR311C                 | GLC8          |
| YBR107C                                          | IML3          | YOL081W                 | IRA2          |
| YGL124C                                          | MON1          | YEL060C                 | PRB1          |
| YAL024C                                          | LTE1          | YKL048C                 | ELM1          |
| YCR097W                                          | HMRA1         | YCR084C                 | TUP1          |
| YPL037C                                          | EGD1          | YNR072W                 | HXT17         |
| YNL243W                                          | SLA2          | YPL024W                 | RMI1          |

| Predictions at threshold level 0.75 continued... |               |                         |               |
|--------------------------------------------------|---------------|-------------------------|---------------|
| Gene1 of predicted pair                          |               | Gene2 of predicted pair |               |
| Systematic Name                                  | Standard Name | Systematic Name         | Standard Name |
| YGL033W                                          | HOP2          | YLR192C                 | HCR1          |
| YDR123C                                          | INO2          | YPL248C                 | GAL4          |
| YAL024C                                          | LTE1          | YJR063W                 | RPA12         |
| YBL008W                                          | HIR1          | YDR378C                 | LSM6          |
| YPL050C                                          | MNN9          | YNL079C                 | TPM1          |
| YDR142C                                          | PEX7          | YDL065C                 | PEX19         |
| YLR095C                                          | IOC2          | YDR207C                 | UME6          |
| YGL175C                                          | SAE2          | YJR035W                 | RAD26         |
| YER110C                                          | KAP123        | YGL124C                 | MON1          |
| YKL139W                                          | CTK1          | YLR320W                 | MMS22         |
| YJR035W                                          | RAD26         | YNL107W                 | YAF9          |
| YOR112W                                          | CEX1          | YOL018C                 | TLG2          |
| YKL025C                                          | PAN3          | YOR132W                 | VPS17         |
| YLR119W                                          | SRN2          | YJR032W                 | CPR7          |
| YAL024C                                          | LTE1          | YPL195W                 | APL5          |
| YBR278W                                          | DPB3          | YOR038C                 | HIR2          |
| YDR244W                                          | PEX5          | YOL044W                 | PEX15         |
| YIL034C                                          | CAP2          | YHL002W                 | HSE1          |
| YBR171W                                          | SEC66         | YDR207C                 | UME6          |
| YCL010C                                          | SGF29         | YGR252W                 | GCN5          |
| YMR055C                                          | BUB2          | YDR183W                 | PLP1          |
| YNR072W                                          | HXT17         | YDR358W                 | GGA1          |
| YGR249W                                          | MGA1          | YCR053W                 | THR4          |
| YPL022W                                          | RAD1          | YGL031C                 | RPL24A        |
| YDR440W                                          | DOT1          | YKL041W                 | VPS24         |
| YDL155W                                          | CLB3          | YLR131C                 | ACE2          |
| YHR161C                                          | YAP1801       | YOR327C                 | SNC2          |
| YPL256C                                          | CLN2          | YNL116W                 | DMA2          |
| YPL042C                                          | SSN3          | YDR318W                 | MCM21         |

| Predictions at threshold level 0.75 continued... |               |                         |               |
|--------------------------------------------------|---------------|-------------------------|---------------|
| Gene1 of predicted pair                          |               | Gene2 of predicted pair |               |
| Systematic Name                                  | Standard Name | Systematic Name         | Standard Name |
| YDR289C                                          | RTT103        | YOR368W                 | RAD17         |
| YDL116W                                          | NUP84         | YML112W                 | CTK3          |
| YBR200W                                          | BEM1          | YMR032W                 | HOF1          |
| YDR254W                                          | CHL4          | YLR032W                 | RAD5          |
| YJR084W                                          | CSN12         | YOR368W                 | RAD17         |
| YDL116W                                          | NUP84         | YPL178W                 | CBC2          |
| YPL161C                                          | BEM4          | YHL002W                 | HSE1          |
| YGR105W                                          | VMA21         | YAL002W                 | VPS8          |
| YDR101C                                          | ARX1          | YKL068W                 | NUP100        |
| YDL160C                                          | DHH1          | YML095C                 | RAD10         |
| YPL018W                                          | CTF19         | YJR035W                 | RAD26         |
| YIL008W                                          | URM1          | YPL018W                 | CTF19         |
| YBR171W                                          | SEC66         | YGR188C                 | BUB1          |
| YBR215W                                          | HPC2          | YDR200C                 | VPS64         |
| YPR017C                                          | DSS4          | YOL018C                 | TLG2          |
| YDR105C                                          | TMS1          | YFL044C                 | OTU1          |
| YKL048C                                          | ELM1          | YJL157C                 | FAR1          |
| YPL115C                                          | BEM3          | YDL155W                 | CLB3          |
| YHR185C                                          | PFS1          | YIL007C                 | NAS2          |
| YDL005C                                          | MED2          | YCR084C                 | TUP1          |
| YDR293C                                          | SSD1          | YDR183W                 | PLP1          |
| YLR360W                                          | VPS38         | YOR036W                 | PEP12         |
| YPR084W                                          | YPR084W       | YKL213C                 | DOA1          |
| YJR084W                                          | CSN12         | YMR214W                 | SCJ1          |
| YER116C                                          | SLX8          | YLR150W                 | STM1          |
| YJL176C                                          | SWI3          | YKL041W                 | VPS24         |
| YJR090C                                          | GRR1          | YER027C                 | GAL83         |
| YDR254W                                          | CHL4          | YEL056W                 | HAT2          |
| YFL003C                                          | MSH4          | YLR394W                 | CST9          |



| Predictions at threshold level 0.75 continued... |               |                         |               |
|--------------------------------------------------|---------------|-------------------------|---------------|
| Gene1 of predicted pair                          |               | Gene2 of predicted pair |               |
| Systematic Name                                  | Standard Name | Systematic Name         | Standard Name |
| YOL121C                                          | RPS19A        | YLR093C                 | NYV1          |
| YGR019W                                          | UGA1          | YHR178W                 | STB5          |
| YOR132W                                          | VPS17         | YKR030W                 | GMH1          |
| YFR031C-A                                        | RPL2A         | YPR017C                 | DSS4          |
| YOR001W                                          | RRP6          | YLR429W                 | CRN1          |
| YCR086W                                          | CSM1          | YGR188C                 | BUB1          |
| YPL022W                                          | RAD1          | YKR030W                 | GMH1          |
| YMR224C                                          | MRE11         | YNL116W                 | DMA2          |
| YNL116W                                          | DMA2          | YHR115C                 | DMA1          |
| YJR024C                                          | MDE1          | YOR358W                 | HAP5          |
| YOR106W                                          | VAM3          | YNL079C                 | TPM1          |
| YPL195W                                          | APL5          | YMR214W                 | SCJ1          |
| YOL090W                                          | MSH2          | YGL031C                 | RPL24A        |
| YER087C-B                                        | SBH1          | YBR200W                 | BEM1          |
| YDL184C                                          | RPL41A        | YNL307C                 | MCK1          |
| YER116C                                          | SLX8          | YPL161C                 | BEM4          |
| YCR002C                                          | CDC10         | YDR507C                 | GIN4          |
| YMR004W                                          | MVP1          | YER162C                 | RAD4          |
| YDL160C                                          | DHH1          | YDR253C                 | MET32         |
| YER044C                                          | ERG28         | YDL077C                 | VAM6          |
| YMR153W                                          | NUP53         | YHR200W                 | RPN10         |
| YGL124C                                          | MON1          | YMR230W                 | RPS10B        |
| YPL120W                                          | VPS30         | YDR207C                 | UME6          |
| YLR292C                                          | SEC72         | YML095C                 | RAD10         |
| YJR084W                                          | CSN12         | YDL077C                 | VAM6          |
| YHR060W                                          | VMA22         | YER120W                 | SCS2          |
| YOL147C                                          | PEX11         | YNL117W                 | MLS1          |
| YDL223C                                          | HBT1          | YOR035C                 | SHE4          |
| YDR245W                                          | MNN10         | YKL126W                 | YPK1          |

| Predictions at threshold level 0.75 continued... |               |                         |               |
|--------------------------------------------------|---------------|-------------------------|---------------|
| Gene1 of predicted pair                          |               | Gene2 of predicted pair |               |
| Systematic Name                                  | Standard Name | Systematic Name         | Standard Name |
| YDR358W                                          | GGA1          | YBR280C                 | SAF1          |
| YGL078C                                          | DBP3          | YGL003C                 | CDH1          |
| YLR181C                                          | VTA1          | YKR035W-A               | DID2          |
| YNL032W                                          | SIW14         | YLR398C                 | SKI2          |
| YHR205W                                          | SCH9          | YDR388W                 | RVS167        |
| YPR167C                                          | MET16         | YML028W                 | TSA1          |
| YGR217W                                          | CCH1          | YKR020W                 | VPS51         |
| YOR035C                                          | SHE4          | YKL041W                 | VPS24         |
| YPR052C                                          | NHP6A         | YGR275W                 | RTT102        |
| YJL190C                                          | RPS22A        | YGR188C                 | BUB1          |
| YKL032C                                          | IXR1          | YDR440W                 | DOT1          |
| YDR156W                                          | RPA14         | YNR052C                 | POP2          |
| YMR224C                                          | MRE11         | YJL172W                 | CPS1          |
| YLR079W                                          | SIC1          | YBL047C                 | EDE1          |
| YDR153C                                          | ENT5          | YDR207C                 | UME6          |
| YDL006W                                          | PTC1          | YEL051W                 | VMA8          |
| YJL127C                                          | SPT10         | YLR429W                 | CRN1          |
| YPL152W                                          | RRD2          | YJR135C                 | MCM22         |
| YDL116W                                          | NUP84         | YJR063W                 | RPA12         |
| YMR153W                                          | NUP53         | YMR016C                 | SOK2          |
| YOR290C                                          | SNF2          | YJR032W                 | CPR7          |
| YOR083W                                          | WHI5          | YJR135C                 | MCM22         |
| YNL087W                                          | TCB2          | YDR137W                 | RGP1          |
| YJR106W                                          | ECM27         | YKR093W                 | PTR2          |
| YGL190C                                          | CDC55         | YJL187C                 | SWE1          |
| YBR200W                                          | BEM1          | YNL307C                 | MCK1          |
| YKL139W                                          | CTK1          | YGL212W                 | VAM7          |
| YBR093C                                          | PHO5          | YOR368W                 | RAD17         |
| YGL212W                                          | VAM7          | YCR053W                 | THR4          |

| Predictions at threshold level 0.75 continued... |               |                         |               |
|--------------------------------------------------|---------------|-------------------------|---------------|
| Gene1 of predicted pair                          |               | Gene2 of predicted pair |               |
| Systematic Name                                  | Standard Name | Systematic Name         | Standard Name |
| YLR399C                                          | BDF1          | YPL152W                 | RRD2          |
| YNL291C                                          | MID1          | YJL095W                 | BCK1          |
| YCR086W                                          | CSM1          | YNL116W                 | DMA2          |
| YMR016C                                          | SOK2          | YJL183W                 | MNN11         |
| YLR309C                                          | IMH1          | YKR030W                 | GMH1          |
| YHR111W                                          | UBA4          | YOR275C                 | RIM20         |
| YMR172W                                          | HOT1          | YAL002W                 | VPS8          |
| YCL037C                                          | SRO9          | YJL004C                 | SYS1          |
| YER120W                                          | SCS2          | YEL051W                 | VMA8          |
| YFR010W                                          | UBP6          | YDR245W                 | MNN10         |
| YGL060W                                          | YBP2          | YML095C                 | RAD10         |
| YEL043W                                          | YEL043W       | YEL051W                 | VMA8          |
| YOR298C-A                                        | MBF1          | YPR119W                 | CLB2          |
| YLR079W                                          | SIC1          | YAR014C                 | BUD14         |
| YLR337C                                          | VRP1          | YPR051W                 | MAK3          |
| YJL006C                                          | CTK2          | YLR425W                 | TUS1          |
| YGR104C                                          | SRB5          | YJL124C                 | LSM1          |
| YLR191W                                          | PEX13         | YDR244W                 | PEX5          |
| YGL060W                                          | YBP2          | YJR005W                 | APL1          |
| YBL067C                                          | UBP13         | YOR035C                 | SHE4          |
| YOR023C                                          | AHC1          | YJR135C                 | MCM22         |
| YGR270W                                          | YTA7          | YHR012W                 | VPS29         |
| YHR016C                                          | YSC84         | YPL249C                 | GYP5          |
| YMR133W                                          | REC114        | YDL083C                 | RPS16B        |
| YPL129W                                          | TAF14         | YHL025W                 | SNF6          |
| YDR378C                                          | LSM6          | YKL048C                 | ELM1          |
| YMR311C                                          | GLC8          | YCR053W                 | THR4          |
| YJR005W                                          | APL1          | YPL018W                 | CTF19         |
| YMR055C                                          | BUB2          | YGL019W                 | CKB1          |

| Predictions at threshold level 0.75 continued... |               |                         |               |
|--------------------------------------------------|---------------|-------------------------|---------------|
| Gene1 of predicted pair                          |               | Gene2 of predicted pair |               |
| Systematic Name                                  | Standard Name | Systematic Name         | Standard Name |
| YEL065W                                          | SIT1          | YJR032W                 | CPR7          |
| YMR153W                                          | NUP53         | YOR043W                 | WHI2          |
| YBR215W                                          | HPC2          | YML102W                 | CAC2          |
| YGR241C                                          | YAP1802       | YBL047C                 | EDE1          |
| YFL023W                                          | BUD27         | YDR207C                 | UME6          |
| YNR052C                                          | POP2          | YIL036W                 | CST6          |
| YHR060W                                          | VMA22         | YDL006W                 | PTC1          |
| YGL087C                                          | MMS2          | YDR363W-A               | SEM1          |
| YOL145C                                          | CTR9          | YNL107W                 | YAF9          |
| YNL243W                                          | SLA2          | YNL098C                 | RAS2          |
| YKL006W                                          | RPL14A        | YOL081W                 | IRA2          |
| YDR335W                                          | MSN5          | YOL054W                 | PSH1          |
| YGR252W                                          | GCN5          | YDR469W                 | SDC1          |
| YPR018W                                          | RLF2          | YDL005C                 | MED2          |
| YMR198W                                          | CIK1          | YML097C                 | VPS9          |
| YGL078C                                          | DBP3          | YPL137C                 | GIP3          |
| YDR004W                                          | RAD57         | YPR036W                 | VMA13         |
| YKL025C                                          | PAN3          | YDR318W                 | MCM21         |
| YOR337W                                          | TEA1          | YGL212W                 | VAM7          |
| YBR200W                                          | BEM1          | YBR114W                 | RAD16         |
| YDR156W                                          | RPA14         | YNL054W                 | VAC7          |
| YOR043W                                          | WHI2          | YFR036W                 | CDC26         |
| YBR108W                                          | YBR108W       | YIL008W                 | URM1          |
| YHR111W                                          | UBA4          | YJR090C                 | GRR1          |
| YKR061W                                          | KTR2          | YJL006C                 | CTK2          |
| YKL135C                                          | APL2          | YJR058C                 | APS2          |
| YNR064C                                          | YNR064C       | YOL108C                 | INO4          |
| YPL022W                                          | RAD1          | YMR231W                 | PEP5          |
| YBR171W                                          | SEC66         | YDR335W                 | MSN5          |

| Predictions at threshold level 0.75 continued... |               |                         |               |
|--------------------------------------------------|---------------|-------------------------|---------------|
| Gene1 of predicted pair                          |               | Gene2 of predicted pair |               |
| Systematic Name                                  | Standard Name | Systematic Name         | Standard Name |
| YER044C                                          | ERG28         | YLR398C                 | SKI2          |
| YNL087W                                          | TCB2          | YKR035W-A               | DID2          |
| YIL156W                                          | UBP7          | YMR164C                 | MSS11         |
| YLR234W                                          | TOP3          | YAL015C                 | NTG1          |
| YMR153W                                          | NUP53         | YDL083C                 | RPS16B        |
| YNL058C                                          | YNL058C       | YML071C                 | COG8          |
| YGL178W                                          | MPT5          | YAL040C                 | CLN3          |
| YDR363W-A                                        | SEM1          | YLR410W                 | VIP1          |
| YGL161C                                          | YIP5          | YKR001C                 | VPS1          |
| YOR080W                                          | DIA2          | YDR289C                 | RTT103        |
| YPL253C                                          | VIK1          | YKL101W                 | HSL1          |
| YLR410W                                          | VIP1          | YGL031C                 | RPL24A        |
| YKL032C                                          | IXR1          | YJL006C                 | CTK2          |
| YMR026C                                          | PEX12         | YHR200W                 | RPN10         |
| YBL008W                                          | HIR1          | YOR080W                 | DIA2          |
| YHL031C                                          | GOS1          | YGR020C                 | VMA7          |
| YGR252W                                          | GCN5          | YJL095W                 | BCK1          |
| YDL002C                                          | NHP10         | YOR308C                 | SNU66         |
| YLR360W                                          | VPS38         | YPL161C                 | BEM4          |
| YMR224C                                          | MRE11         | YNL117W                 | MLS1          |
| YGL133W                                          | ITC1          | YHR152W                 | SPO12         |
| YOR001W                                          | RRP6          | YMR125W                 | STO1          |
| YDR156W                                          | RPA14         | YMR055C                 | BUB2          |
| YNL041C                                          | COG6          | YML071C                 | COG8          |
| YPL037C                                          | EGD1          | YKR030W                 | GMH1          |
| YLR337C                                          | VRP1          | YDR155C                 | CPR1          |
| YIL036W                                          | CST6          | YHR115C                 | DMA1          |
| YMR153W                                          | NUP53         | YLR180W                 | SAM1          |
| YPL115C                                          | BEM3          | YPL018W                 | CTF19         |

| Predictions at threshold level 0.75 continued... |               |                         |               |
|--------------------------------------------------|---------------|-------------------------|---------------|
| Gene1 of predicted pair                          |               | Gene2 of predicted pair |               |
| Systematic Name                                  | Standard Name | Systematic Name         | Standard Name |
| YDR379W                                          | RGA2          | YJL187C                 | SWE1          |
| YEL043W                                          | YEL043W       | YJL004C                 | SYS1          |
| YLR371W                                          | ROM2          | YER049W                 | TPA1          |
| YKR020W                                          | VPS51         | YAR014C                 | BUD14         |
| YFL023W                                          | BUD27         | YDL077C                 | VAM6          |
| YNL325C                                          | FIG4          | YKL048C                 | ELM1          |
| YDR174W                                          | HMO1          | YEL027W                 | CUP5          |
| YOR080W                                          | DIA2          | YNL016W                 | PUB1          |
| YGR072W                                          | UPF3          | YNL041C                 | COG6          |
| YPL161C                                          | BEM4          | YMR038C                 | CCS1          |
| YDR101C                                          | ARX1          | YER110C                 | KAP123        |
| YIR009W                                          | MSL1          | YCR077C                 | PAT1          |
| YER110C                                          | KAP123        | YHR111W                 | UBA4          |
| YOR290C                                          | SNF2          | YER044C                 | ERG28         |
| YPL240C                                          | HSP82         | YGL096W                 | TOS8          |
| YDL101C                                          | DUN1          | YOL030W                 | GAS5          |
| YOR156C                                          | NFI1          | YLR357W                 | RSC2          |
| YJL154C                                          | VPS35         | YOR140W                 | SFL1          |
| YFR036W                                          | CDC26         | YMR038C                 | CCS1          |
| YKL160W                                          | ELF1          | YCR077C                 | PAT1          |
| YGL200C                                          | EMP24         | YOL081W                 | IRA2          |
| YHR200W                                          | RPN10         | YGL115W                 | SNF4          |
| YFL013C                                          | IES1          | YHL031C                 | GOS1          |
| YDR363W-A                                        | SEM1          | YKL101W                 | HSL1          |
| YHR114W                                          | BZZ1          | YHL002W                 | HSE1          |
| YPL024W                                          | RMI1          | YDR137W                 | RGP1          |
| YLR362W                                          | STE11         | YDL159W                 | STE7          |
| YHL031C                                          | GOS1          | YDR245W                 | MNN10         |
| YDR004W                                          | RAD57         | YML013W                 | UBX2          |

| Predictions at threshold level 0.75 continued... |               |                         |               |
|--------------------------------------------------|---------------|-------------------------|---------------|
| Gene1 of predicted pair                          |               | Gene2 of predicted pair |               |
| Systematic Name                                  | Standard Name | Systematic Name         | Standard Name |
| YPR120C                                          | CLB5          | YDL155W                 | CLB3          |
| YMR198W                                          | CIK1          | YHL027W                 | RIM101        |
| YER110C                                          | KAP123        | YLR399C                 | BDF1          |
| YOR038C                                          | HIR2          | YLR182W                 | SWI6          |
| YDR079C-A                                        | TFB5          | YGL009C                 | LEU1          |
| YPR029C                                          | APL4          | YOR069W                 | VPS5          |
| YLR094C                                          | GIS3          | YNL076W                 | MKS1          |
| YKL048C                                          | ELM1          | YNL289W                 | PCL1          |
| YPL112C                                          | PEX25         | YLR371W                 | ROM2          |
| YIL076W                                          | SEC28         | YER161C                 | SPT2          |
| YKL139W                                          | CTK1          | YBR215W                 | HPC2          |
| YLR381W                                          | CTF3          | YEL053C                 | MAK10         |
| YNL291C                                          | MID1          | YPL037C                 | EGD1          |
| YMR091C                                          | NPL6          | YLR357W                 | RSC2          |
| YMR080C                                          | NAM7          | YBL079W                 | NUP170        |
| YOL013C                                          | HRD1          | YMR022W                 | UBC7          |
| YLR234W                                          | TOP3          | YOR043W                 | WHI2          |
| YPR131C                                          | NAT3          | YOR195W                 | SLK19         |
| YKL006W                                          | RPL14A        | YJL183W                 | MNN11         |
| YOR212W                                          | STE4          | YDR183W                 | PLP1          |
| YOR337W                                          | TEA1          | YLR192C                 | HCR1          |
| YJR021C                                          | REC107        | YMR133W                 | REC114        |
| YDL020C                                          | RPN4          | YJR060W                 | CBF1          |
| YOR106W                                          | VAM3          | YJR060W                 | CBF1          |
| YDL002C                                          | NHP10         | YOR124C                 | UBP2          |
| YIL034C                                          | CAP2          | YOR358W                 | HAP5          |
| YMR153W                                          | NUP53         | YER115C                 | SPR6          |
| YMR172W                                          | HOT1          | YBR108W                 | YBR108W       |
| YLR234W                                          | TOP3          | YMR231W                 | PEP5          |

| Predictions at threshold level 0.75 continued... |               |                         |               |
|--------------------------------------------------|---------------|-------------------------|---------------|
| Gene1 of predicted pair                          |               | Gene2 of predicted pair |               |
| Systematic Name                                  | Standard Name | Systematic Name         | Standard Name |
| YCL032W                                          | STE50         | YCR086W                 | CSM1          |
| YGR133W                                          | PEX4          | YKR020W                 | VPS51         |
| YNL243W                                          | SLA2          | YNL250W                 | RAD50         |
| YHR156C                                          | LIN1          | YDL192W                 | ARF1          |
| YJL078C                                          | PRY3          | YPR149W                 | NCE102        |
| YLR090W                                          | XDJ1          | YPR030W                 | CSR2          |
| YJR056C                                          | YJR056C       | YPL137C                 | GIP3          |
| YKL048C                                          | ELM1          | YHR012W                 | VPS29         |
| YPL022W                                          | RAD1          | YDL226C                 | GCS1          |
| YMR109W                                          | MYO5          | YGL151W                 | NUT1          |
| YFR010W                                          | UBP6          | YDR335W                 | MSN5          |
| YCL037C                                          | SRO9          | YPL120W                 | VPS30         |
| YOL061W                                          | PRS5          | YOR043W                 | WHI2          |
| YML013W                                          | UBX2          | YER162C                 | RAD4          |
| YMR179W                                          | SPT21         | YDL047W                 | SIT4          |
| YEL065W                                          | SIT1          | YPR046W                 | MCM16         |
| YGL003C                                          | CDH1          | YLR370C                 | ARC18         |
| YBR194W                                          | SOY1          | YCR077C                 | PAT1          |
| YLR320W                                          | MMS22         | YJL183W                 | MNN11         |
| YPL105C                                          | YPL105C       | YEL043W                 | YEL043W       |
| YFR036W                                          | CDC26         | YBR036C                 | CSG2          |
| YLR192C                                          | HCR1          | YKL126W                 | YPK1          |
| YFR021W                                          | ATG18         | YPR119W                 | CLB2          |
| YPL096C-A                                        | ERI1          | YEL036C                 | ANP1          |
| YMR109W                                          | MYO5          | YAL002W                 | VPS8          |
| YHR039C-A                                        | VMA10         | YDR153C                 | ENT5          |
| YLR360W                                          | VPS38         | YPL018W                 | CTF19         |
| YLR360W                                          | VPS38         | YOR008C                 | SLG1          |
| YDR261C                                          | EXG2          | YFR036W                 | CDC26         |



| Predictions at threshold level 0.75 continued... |               |                         |               |
|--------------------------------------------------|---------------|-------------------------|---------------|
| Gene1 of predicted pair                          |               | Gene2 of predicted pair |               |
| Systematic Name                                  | Standard Name | Systematic Name         | Standard Name |
| YML071C                                          | COG8          | YJR084W                 | CSN12         |
| YBL103C                                          | RTG3          | YER139C                 | YER139C       |
| YNL106C                                          | INP52         | YNL054W                 | VAC7          |
| YPR171W                                          | BSP1          | YKR030W                 | GMH1          |
| YIL156W                                          | UBP7          | YJR059W                 | PTK2          |
| YHR178W                                          | STB5          | YKL048C                 | ELM1          |
| YGR054W                                          | YGR054W       | YHL002W                 | HSE1          |
| YOR080W                                          | DIA2          | YCR077C                 | PAT1          |
| YFR036W                                          | CDC26         | YDR440W                 | DOT1          |
| YIL159W                                          | BNR1          | YLR191W                 | PEX13         |
| YCL001W                                          | RER1          | YLR309C                 | IMH1          |
| YML103C                                          | NUP188        | YGL163C                 | RAD54         |
| YGL025C                                          | PGD1          | YNL307C                 | MCK1          |
| YOR368W                                          | RAD17         | YDR207C                 | UME6          |
| YJL187C                                          | SWE1          | YBR082C                 | UBC4          |
| YOR127W                                          | RGA1          | YEL053C                 | MAK10         |
| YOR106W                                          | VAM3          | YMR204C                 | INP1          |
| YGL223C                                          | COG1          | YML067C                 | ERV41         |
| YLL007C                                          | YLL007C       | YLR234W                 | TOP3          |
| YBR107C                                          | IML3          | YIL008W                 | URM1          |
| YLR192C                                          | HCR1          | YDR137W                 | RGP1          |
| YDR225W                                          | HTA1          | YNL030W                 | HHF2          |
| YBL078C                                          | ATG8          | YNR007C                 | ATG3          |
| YDR477W                                          | SNF1          | YJR056C                 | YJR056C       |
| YLR221C                                          | RSA3          | YKR024C                 | DBP7          |
| YMR202W                                          | ERG2          | YJR135C                 | MCM22         |
| YGR108W                                          | CLB1          | YMR109W                 | MYO5          |
| YMR199W                                          | CLN1          | YDR264C                 | AKR1          |
| YJL154C                                          | VPS35         | YBR200W                 | BEM1          |

| Predictions at threshold level 0.75 continued... |               |                         |               |
|--------------------------------------------------|---------------|-------------------------|---------------|
| Gene1 of predicted pair                          |               | Gene2 of predicted pair |               |
| Systematic Name                                  | Standard Name | Systematic Name         | Standard Name |
| YDR108W                                          | GSG1          | YJR135C                 | MCM22         |
| YML117W                                          | NAB6          | YGR217W                 | CCH1          |
| YJL124C                                          | LSM1          | YIL103W                 | DPH1          |
| YJL138C                                          | TIF2          | YLR350W                 | ORM2          |
| YFR024C-A                                        | LSB3          | YGR268C                 | HUA1          |
| YMR016C                                          | SOK2          | YDR207C                 | UME6          |
| YER087C-B                                        | SBH1          | YGL226C-A               | OST5          |
| YFR031C-A                                        | RPL2A         | YNR072W                 | HXT17         |
| YMR016C                                          | SOK2          | YKR099W                 | BAS1          |
| YPL018W                                          | CTF19         | YNL147W                 | LSM7          |
| YNL206C                                          | RTT106        | YDR264C                 | AKR1          |
| YNL106C                                          | INP52         | YHR108W                 | GGA2          |
| YDR156W                                          | RPA14         | YML016C                 | PPZ1          |
| YKL025C                                          | PAN3          | YGL237C                 | HAP2          |
| YDR192C                                          | NUP42         | YDR207C                 | UME6          |
| YDR484W                                          | VPS52         | YJR032W                 | CPR7          |
| YMR142C                                          | RPL13B        | YDR137W                 | RGP1          |
| YML038C                                          | YMD8          | YPL195W                 | APL5          |
| YKL116C                                          | PRR1          | YLR371W                 | ROM2          |
| YBR200W                                          | BEM1          | YIL008W                 | URM1          |
| YPL022W                                          | RAD1          | YJL187C                 | SWE1          |
| YDR392W                                          | SPT3          | YBR089C-A               | NHP6B         |
| YGL212W                                          | VAM7          | YKR020W                 | VPS51         |
| YOR001W                                          | RRP6          | YML016C                 | PPZ1          |
| YNL288W                                          | CAF40         | YMR109W                 | MYO5          |
| YLR170C                                          | APS1          | YKL135C                 | APL2          |
| YML103C                                          | NUP188        | YLR182W                 | SWI6          |
| YBR171W                                          | SEC66         | YEL056W                 | HAT2          |
| YMR199W                                          | CLN1          | YGL163C                 | RAD54         |

| Predictions at threshold level 0.75 continued... |               |                         |               |
|--------------------------------------------------|---------------|-------------------------|---------------|
| Gene1 of predicted pair                          |               | Gene2 of predicted pair |               |
| Systematic Name                                  | Standard Name | Systematic Name         | Standard Name |
| YLR386W                                          | VAC14         | YBR084C-A               | RPL19A        |
| YKL025C                                          | PAN3          | YPR046W                 | MCM16         |
| YDL042C                                          | SIR2          | YDR227W                 | SIR4          |
| YER116C                                          | SLX8          | YER044C                 | ERG28         |
| YER114C                                          | BOI2          | YGR014W                 | MSB2          |
| YEL065W                                          | SIT1          | YBR280C                 | SAF1          |
| YPL057C                                          | SUR1          | YKL101W                 | HSL1          |
| YNL288W                                          | CAF40         | YPL253C                 | VIK1          |
| YOR106W                                          | VAM3          | YJR040W                 | GEF1          |
| YLR398C                                          | SKI2          | YER040W                 | GLN3          |
| YDR146C                                          | SWI5          | YBR215W                 | HPC2          |
| YNL206C                                          | RTT106        | YDL185W                 | TFP1          |
| YLR360W                                          | VPS38         | YOR069W                 | VPS5          |
| YPL018W                                          | CTF19         | YGL252C                 | RTG2          |
| YLR381W                                          | CTF3          | YNL236W                 | SIN4          |
| YLR292C                                          | SEC72         | YHR134W                 | WSS1          |
| YLR192C                                          | HCR1          | YHR060W                 | VMA22         |
| YMR224C                                          | MRE11         | YJR084W                 | CSN12         |
| YDL223C                                          | HBT1          | YNL041C                 | COG6          |
| YFR010W                                          | UBP6          | YOR066W                 | MSA1          |
| YLR441C                                          | RPS1A         | YOR035C                 | SHE4          |
| YNL215W                                          | IES2          | YLR398C                 | SKI2          |
| YJL154C                                          | VPS35         | YNL199C                 | GCR2          |
| YJL172W                                          | CPS1          | YPL161C                 | BEM4          |
| YDR137W                                          | RGP1          | YNL107W                 | YAF9          |
| YCR038C                                          | BUD5          | YPR119W                 | CLB2          |
| YHR111W                                          | UBA4          | YAL002W                 | VPS8          |
| YLR144C                                          | ACF2          | YOR284W                 | HUA2          |
| YJL172W                                          | CPS1          | YGL115W                 | SNF4          |

| Predictions at threshold level 0.75 continued... |               |                         |               |
|--------------------------------------------------|---------------|-------------------------|---------------|
| Gene1 of predicted pair                          |               | Gene2 of predicted pair |               |
| Systematic Name                                  | Standard Name | Systematic Name         | Standard Name |
| YOR140W                                          | SFL1          | YNL079C                 | TPM1          |
| YDR130C                                          | FIN1          | YLR254C                 | NDL1          |
| YOR290C                                          | SNF2          | YNL107W                 | YAF9          |
| YDR439W                                          | LRS4          | YDR378C                 | LSM6          |
| YJR031C                                          | GEA1          | YDL137W                 | ARF2          |
| YGL087C                                          | MMS2          | YHR178W                 | STB5          |
| YPL161C                                          | BEM4          | YHR012W                 | VPS29         |
| YER144C                                          | UBP5          | YPR030W                 | CSR2          |
| YMR026C                                          | PEX12         | YJR056C                 | YJR056C       |
| YHR134W                                          | WSS1          | YBR200W                 | BEM1          |
| YGL087C                                          | MMS2          | YGR188C                 | BUB1          |
| YER110C                                          | KAP123        | YPL253C                 | VIK1          |
| YMR224C                                          | MRE11         | YML095C                 | RAD10         |
| YLR360W                                          | VPS38         | YMR231W                 | PEP5          |
| YDL135C                                          | RDI1          | YLR324W                 | PEX30         |
| YLR150W                                          | STM1          | YDR254W                 | CHL4          |
| YOR106W                                          | VAM3          | YHL020C                 | OPI1          |
| YDL223C                                          | HBT1          | YLR320W                 | MMS22         |
| YOL111C                                          | MDY2          | YBR019C                 | GAL10         |
| YGR129W                                          | SYF2          | YBR065C                 | ECM2          |
| YOR337W                                          | TEA1          | YLR371W                 | ROM2          |
| YPL018W                                          | CTF19         | YDL226C                 | GCS1          |
| YDR484W                                          | VPS52         | YNL238W                 | KEX2          |
| YHR200W                                          | RPN10         | YDL006W                 | PTC1          |
| YNL166C                                          | BNI5          | YGR188C                 | BUB1          |
| YBL103C                                          | RTG3          | YCR053W                 | THR4          |
| YBR112C                                          | CYC8          | YPR068C                 | HOS1          |
| YMR224C                                          | MRE11         | YPL022W                 | RAD1          |
| YDR378C                                          | LSM6          | YPR120C                 | CLB5          |

| Predictions at threshold level 0.75 continued... |               |                         |               |
|--------------------------------------------------|---------------|-------------------------|---------------|
| Gene1 of predicted pair                          |               | Gene2 of predicted pair |               |
| Systematic Name                                  | Standard Name | Systematic Name         | Standard Name |
| YDL155W                                          | CLB3          | YKL101W                 | HSL1          |
| YFR010W                                          | UBP6          | YCR086W                 | CSM1          |
| YBR217W                                          | ATG12         | YLR180W                 | SAM1          |
| YDL116W                                          | NUP84         | YPL152W                 | RRD2          |
| YOR270C                                          | VPH1          | YKR099W                 | BAS1          |
| YGL043W                                          | DST1          | YHR056C                 | RSC30         |
| YBL058W                                          | SHP1          | YOL081W                 | IRA2          |
| YNL253W                                          | TEX1          | YHR167W                 | THP2          |
| YNL333W                                          | SNZ2          | YMR096W                 | SNZ1          |
| YDL125C                                          | HNT1          | YNL236W                 | SIN4          |
| YDR080W                                          | VPS41         | YPR173C                 | VPS4          |
| YKR035W-A                                        | DID2          | YLR371W                 | ROM2          |
| YEL050C                                          | RML2          | YGL003C                 | CDH1          |
| YGL033W                                          | HOP2          | YDR484W                 | VPS52         |
| YDL002C                                          | NHP10         | YHR200W                 | RPN10         |
| YDL077C                                          | VAM6          | YLR398C                 | SKI2          |
| YJR010C-A                                        | SPC1          | YOR085W                 | OST3          |
| YNL199C                                          | GCR2          | YMR038C                 | CCS1          |
| YML038C                                          | YMD8          | YKR030W                 | GMH1          |
| YDR285W                                          | ZIP1          | YLR394W                 | CST9          |
| YKL139W                                          | CTK1          | YLR254C                 | NDL1          |
| YDR245W                                          | MNN10         | YDR289C                 | RTT103        |
| YLR381W                                          | CTF3          | YKL048C                 | ELM1          |
| YDR484W                                          | VPS52         | YHR200W                 | RPN10         |
| YOR035C                                          | SHE4          | YBR280C                 | SAF1          |
| YLR058C                                          | SHM2          | YGL003C                 | CDH1          |
| YIL053W                                          | RHR2          | YGL033W                 | HOP2          |
| YDR137W                                          | RGP1          | YGL200C                 | EMP24         |
| YAL024C                                          | LTE1          | YNR052C                 | POP2          |

| Predictions at threshold level 0.75 continued... |               |                         |               |
|--------------------------------------------------|---------------|-------------------------|---------------|
| Gene1 of predicted pair                          |               | Gene2 of predicted pair |               |
| Systematic Name                                  | Standard Name | Systematic Name         | Standard Name |
| YKL116C                                          | PRR1          | YNL076W                 | MKS1          |
| YHR128W                                          | FUR1          | YPL240C                 | HSP82         |
| YDL192W                                          | ARF1          | YDR310C                 | SUM1          |
| YLR083C                                          | EMP70         | YPL037C                 | EGD1          |
| YJR135C                                          | MCM22         | YGL003C                 | CDH1          |
| YPL057C                                          | SUR1          | YDR440W                 | DOT1          |
| YNL215W                                          | IES2          | YGR014W                 | MSB2          |
| YMR255W                                          | GFD1          | YIL033C                 | BCY1          |
| YER114C                                          | BOI2          | YNL116W                 | DMA2          |
| YMR199W                                          | CLN1          | YDR245W                 | MNN10         |
| YER001W                                          | MNN1          | YEL044W                 | IES6          |
| YKR001C                                          | VPS1          | YPL105C                 | YPL105C       |
| YLL007C                                          | YLL007C       | YHR134W                 | WSS1          |
| YPR017C                                          | DSS4          | YKR020W                 | VPS51         |
| YHR152W                                          | SPO12         | YNL116W                 | DMA2          |
| YHR084W                                          | STE12         | YLR362W                 | STE11         |
| YHR060W                                          | VMA22         | YLR320W                 | MMS22         |
| YBR215W                                          | HPC2          | YPL106C                 | SSE1          |
| YHR039C-A                                        | VMA10         | YBL025W                 | RRN10         |
| YNL058C                                          | YNL058C       | YNR072W                 | HXT17         |
| YNL243W                                          | SLA2          | YNR051C                 | BRE5          |
| YDR202C                                          | RAV2          | YNL044W                 | YIP3          |
| YDR363W-A                                        | SEM1          | YLR182W                 | SWI6          |
| YDR183W                                          | PLP1          | YLR182W                 | SWI6          |
| YFR010W                                          | UBP6          | YLR192C                 | HCR1          |
| YAL020C                                          | ATS1          | YLR425W                 | TUS1          |
| YBR200W                                          | BEM1          | YBR084C-A               | RPL19A        |
| YMR153W                                          | NUP53         | YNL058C                 | YNL058C       |
| YJL154C                                          | VPS35         | YML001W                 | YPT7          |

| Predictions at threshold level 0.75 continued... |               |                         |               |
|--------------------------------------------------|---------------|-------------------------|---------------|
| Gene1 of predicted pair                          |               | Gene2 of predicted pair |               |
| Systematic Name                                  | Standard Name | Systematic Name         | Standard Name |
| YBR200W                                          | BEM1          | YOR140W                 | SFL1          |
| YPR017C                                          | DSS4          | YOR127W                 | RGA1          |
| YOR127W                                          | RGA1          | YGR105W                 | VMA21         |
| YML103C                                          | NUP188        | YMR273C                 | ZDS1          |
| YDR335W                                          | MSN5          | YML112W                 | CTK3          |
| YPL161C                                          | BEM4          | YBL085W                 | BOI1          |
| YLR083C                                          | EMP70         | YGL115W                 | SNF4          |
| YBR030W                                          | YBR030W       | YNL087W                 | TCB2          |
| YMR224C                                          | MRE11         | YOR337W                 | TEA1          |
| YGL066W                                          | SGF73         | YHR013C                 | ARD1          |
| YBL047C                                          | EDE1          | YDR264C                 | AKR1          |
| YNL206C                                          | RTT106        | YJL141C                 | YAK1          |
| YMR198W                                          | CIK1          | YBR171W                 | SEC66         |
| YHR056C                                          | RSC30         | YKL057C                 | NUP120        |
| YMR089C                                          | YTA12         | YEL036C                 | ANP1          |
| YHR178W                                          | STB5          | YOR358W                 | HAP5          |
| YCL001W                                          | RER1          | YDR310C                 | SUM1          |
| YLR090W                                          | XDJ1          | YMR224C                 | MRE11         |
| YEL053C                                          | MAK10         | YLR371W                 | ROM2          |
| YPL042C                                          | SSN3          | YEL013W                 | VAC8          |
| YFR010W                                          | UBP6          | YBR171W                 | SEC66         |
| YCR020C-A                                        | MAK31         | YDR293C                 | SSD1          |
| YCR024C-A                                        | PMP1          | YKR024C                 | DBP7          |
| YJL183W                                          | MNN11         | YKL041W                 | VPS24         |
| YMR224C                                          | MRE11         | YGL200C                 | EMP24         |
| YOR106W                                          | VAM3          | YER122C                 | GLO3          |
| YFR031C-A                                        | RPL2A         | YJR033C                 | RAV1          |
| YDR507C                                          | GIN4          | YGR135W                 | PRE9          |
| YFL023W                                          | BUD27         | YML095C                 | RAD10         |

| Predictions at threshold level 0.75 continued... |               |                         |               |
|--------------------------------------------------|---------------|-------------------------|---------------|
| Gene1 of predicted pair                          |               | Gene2 of predicted pair |               |
| Systematic Name                                  | Standard Name | Systematic Name         | Standard Name |
| YLR320W                                          | MMS22         | YPL089C                 | RLM1          |
| YNL218W                                          | MGS1          | YMR116C                 | ASC1          |
| YMR311C                                          | GLC8          | YPR119W                 | CLB2          |
| YGR104C                                          | SRB5          | YBR020W                 | GAL1          |
| YML112W                                          | CTK3          | YNL107W                 | YAF9          |
| YHL031C                                          | GOS1          | YML001W                 | YPT7          |
| YJR140C                                          | HIR3          | YEL056W                 | HAT2          |
| YOR106W                                          | VAM3          | YEL051W                 | VMA8          |
| YDR439W                                          | LRS4          | YOL081W                 | IRA2          |
| YER144C                                          | UBP5          | YBR019C                 | GAL10         |
| YPL195W                                          | APL5          | YDR207C                 | UME6          |
| YDR358W                                          | GGA1          | YLR206W                 | ENT2          |
| YJL122W                                          | ALB1          | YDR101C                 | ARX1          |
| YJL176C                                          | SWI3          | YML097C                 | VPS9          |
| YBL008W                                          | HIR1          | YML016C                 | PPZ1          |
| YBR215W                                          | HPC2          | YEL013W                 | VAC8          |
| YLR360W                                          | VPS38         | YDL155W                 | CLB3          |
| YER116C                                          | SLX8          | YBR108W                 | YBR108W       |
| YJL154C                                          | VPS35         | YBR108W                 | YBR108W       |
| YPR017C                                          | DSS4          | YNR049C                 | MSO1          |
| YGL147C                                          | RPL9A         | YOL121C                 | RPS19A        |
| YNL069C                                          | RPL16B        | YBL102W                 | SFT2          |
| YNL238W                                          | KEX2          | YHR081W                 | LRP1          |
| YDR146C                                          | SWI5          | YEL036C                 | ANP1          |
| YGL078C                                          | DBP3          | YDR484W                 | VPS52         |
| YPL195W                                          | APL5          | YDR153C                 | ENT5          |
| YML115C                                          | VAN1          | YAL002W                 | VPS8          |
| YBL047C                                          | EDE1          | YPL256C                 | CLN2          |
| YKR059W                                          | TIF1          | YGR188C                 | BUB1          |



| Predictions at threshold level 0.75 continued... |               |                         |               |
|--------------------------------------------------|---------------|-------------------------|---------------|
| Gene1 of predicted pair                          |               | Gene2 of predicted pair |               |
| Systematic Name                                  | Standard Name | Systematic Name         | Standard Name |
| YIL133C                                          | RPL16A        | YOR208W                 | PTP2          |
| YNL041C                                          | COG6          | YNL127W                 | FAR11         |
| YLL039C                                          | UBI4          | YGL200C                 | EMP24         |
| YIL148W                                          | RPL40A        | YGL016W                 | KAP122        |
| YNL238W                                          | KEX2          | YDR207C                 | UME6          |
| YFR031C-A                                        | RPL2A         | YER144C                 | UBP5          |
| YMR231W                                          | PEP5          | YOR035C                 | SHE4          |
| YLR441C                                          | RPS1A         | YKL048C                 | ELM1          |
| YNL215W                                          | IES2          | YIL036W                 | CST6          |
| YLR360W                                          | VPS38         | YMR127C                 | SAS2          |
| YMR095C                                          | SNO1          | YLR094C                 | GIS3          |
| YFL013C                                          | IES1          | YDR137W                 | RGP1          |
| YFR031C-A                                        | RPL2A         | YNL032W                 | SIW14         |
| YJR094C                                          | IME1          | YDR207C                 | UME6          |
| YDR225W                                          | HTA1          | YNL215W                 | IES2          |
| YBL102W                                          | SFT2          | YGL223C                 | COG1          |
| YAL024C                                          | LTE1          | YGL038C                 | OCH1          |
| YMR004W                                          | MVP1          | YOR327C                 | SNC2          |
| YER044C                                          | ERG28         | YGL003C                 | CDH1          |
| YGL066W                                          | SGF73         | YPL256C                 | CLN2          |
| YLR006C                                          | SSK1          | YDR293C                 | SSD1          |
| YDL020C                                          | RPN4          | YMR198W                 | CIK1          |
| YGR285C                                          | ZUO1          | YPL038W                 | MET31         |
| YER116C                                          | SLX8          | YLR032W                 | RAD5          |
| YOR043W                                          | WHI2          | YER040W                 | GLN3          |
| YER120W                                          | SCS2          | YML001W                 | YPT7          |
| YLR090W                                          | XDJ1          | YKR035W-A               | DID2          |
| YDR129C                                          | SAC6          | YCR077C                 | PAT1          |
| YDR225W                                          | HTA1          | YDR318W                 | MCM21         |

| Predictions at threshold level 0.75 continued... |               |                         |               |
|--------------------------------------------------|---------------|-------------------------|---------------|
| Gene1 of predicted pair                          |               | Gene2 of predicted pair |               |
| Systematic Name                                  | Standard Name | Systematic Name         | Standard Name |
| YOR008C                                          | SLG1          | YEL036C                 | ANP1          |
| YDR477W                                          | SNF1          | YJR084W                 | CSN12         |
| YLR233C                                          | EST1          | YGR188C                 | BUB1          |
| YGL135W                                          | RPL1B         | YDR129C                 | SAC6          |
| YPL022W                                          | RAD1          | YLR352W                 | YLR352W       |
| YCR077C                                          | PAT1          | YOR038C                 | HIR2          |
| YHR156C                                          | LIN1          | YNL307C                 | MCK1          |
| YKR035W-A                                        | DID2          | YER139C                 | YER139C       |
| YKL139W                                          | CTK1          | YDL083C                 | RPS16B        |
| YNL107W                                          | YAF9          | YAL002W                 | VPS8          |
| YMR214W                                          | SCJ1          | YLR180W                 | SAM1          |
| YHR010W                                          | RPL27A        | YML028W                 | TSA1          |
| YGR019W                                          | UGA1          | YMR127C                 | SAS2          |
| YPR036W                                          | VMA13         | YBL025W                 | RRN10         |
| YGL163C                                          | RAD54         | YCR086W                 | CSM1          |
| YKR101W                                          | SIR1          | YPR119W                 | CLB2          |
| YDL006W                                          | PTC1          | YER118C                 | SHO1          |
| YKL025C                                          | PAN3          | YGL151W                 | NUT1          |
| YDR363W-A                                        | SEM1          | YER161C                 | SPT2          |
| YDR108W                                          | GSG1          | YPL037C                 | EGD1          |
| YIL132C                                          | CSM2          | YHL006C                 | SHU1          |
| YOR270C                                          | VPH1          | YGR020C                 | VMA7          |
| YHR108W                                          | GGA2          | YJL095W                 | BCK1          |
| YML115C                                          | VAN1          | YAL055W                 | PEX22         |
| YNL087W                                          | TCB2          | YMR214W                 | SCJ1          |
| YHR161C                                          | YAP1801       | YGL095C                 | VPS45         |
| YBR173C                                          | UMP1          | YKL126W                 | YPK1          |
| YLR288C                                          | MEC3          | YLR320W                 | MMS22         |
| YNL297C                                          | MON2          | YMR038C                 | CCS1          |

| Predictions at threshold level 0.75 continued... |               |                         |               |
|--------------------------------------------------|---------------|-------------------------|---------------|
| Gene1 of predicted pair                          |               | Gene2 of predicted pair |               |
| Systematic Name                                  | Standard Name | Systematic Name         | Standard Name |
| YDL020C                                          | RPN4          | YOR243C                 | PUS7          |
| YBR194W                                          | SOY1          | YDL006W                 | PTC1          |
| YOR327C                                          | SNC2          | YMR214W                 | SCJ1          |
| YNL291C                                          | MID1          | YPR046W                 | MCM16         |
| YGL033W                                          | HOP2          | YJL095W                 | BCK1          |
| YGL100W                                          | SEH1          | YMR048W                 | CSM3          |
| YGR108W                                          | CLB1          | YAR014C                 | BUD14         |
| YJL058C                                          | BIT61         | YJL006C                 | CTK2          |
| YGL212W                                          | VAM7          | YBR171W                 | SEC66         |
| YOR127W                                          | RGA1          | YDR379W                 | RGA2          |
| YGL212W                                          | VAM7          | YJL004C                 | SYS1          |
| YJR084W                                          | CSN12         | YLR398C                 | SKI2          |
| YKR020W                                          | VPS51         | YJL117W                 | PHO86         |
| YCL027W                                          | FUS1          | YPR119W                 | CLB2          |
| YNL044W                                          | YIP3          | YFL048C                 | EMP47         |
| YOL121C                                          | RPS19A        | YML071C                 | COG8          |
| YKL213C                                          | DOA1          | YOR124C                 | UBP2          |
| YGR104C                                          | SRB5          | YPL129W                 | TAF14         |
| YDR108W                                          | GSG1          | YOR327C                 | SNC2          |
| YML012W                                          | ERV25         | YOR327C                 | SNC2          |
| YHR039C-A                                        | VMA10         | YKL041W                 | VPS24         |
| YPR030W                                          | CSR2          | YPR046W                 | MCM16         |
| YNL307C                                          | MCK1          | YDL192W                 | ARF1          |
| YPL057C                                          | SUR1          | YJR032W                 | CPR7          |
| YBR108W                                          | YBR108W       | YEL060C                 | PRB1          |
| YER139C                                          | YER139C       | YOR327C                 | SNC2          |
| YMR042W                                          | ARG80         | YDR207C                 | UME6          |
| YKR048C                                          | NAP1          | YHR115C                 | DMA1          |
| YPR051W                                          | MAK3          | YPR046W                 | MCM16         |

| Predictions at threshold level 0.75 continued... |               |                         |               |
|--------------------------------------------------|---------------|-------------------------|---------------|
| Gene1 of predicted pair                          |               | Gene2 of predicted pair |               |
| Systematic Name                                  | Standard Name | Systematic Name         | Standard Name |
| YCR053W                                          | THR4          | YBR036C                 | CSG2          |
| YOR039W                                          | CKB2          | YML074C                 | FPR3          |
| YGR019W                                          | UGA1          | YBR114W                 | RAD16         |
| YMR109W                                          | MYO5          | YKL048C                 | ELM1          |
| YLR381W                                          | CTF3          | YHR111W                 | UBA4          |
| YMR224C                                          | MRE11         | YFR010W                 | UBP6          |
| YHR205W                                          | SCH9          | YER049W                 | TPA1          |
| YML115C                                          | VAN1          | YDL077C                 | VAM6          |
| YPR120C                                          | CLB5          | YKL114C                 | APN1          |
| YER087C-B                                        | SBH1          | YGL058W                 | RAD6          |
| YGR270W                                          | YTA7          | YIL103W                 | DPH1          |
| YMR016C                                          | SOK2          | YER040W                 | GLN3          |
| YLR399C                                          | BDF1          | YAR014C                 | BUD14         |
| YLR337C                                          | VRP1          | YNL166C                 | BNI5          |
| YBR217W                                          | ATG12         | YPR030W                 | CSR2          |
| YGL078C                                          | DBP3          | YER144C                 | UBP5          |
| YOR358W                                          | HAP5          | YMR055C                 | BUB2          |
| YBR200W                                          | BEM1          | YLR094C                 | GIS3          |
| YJL053W                                          | PEP8          | YOR036W                 | PEP12         |
| YJR140C                                          | HIR3          | YGR071C                 | YGR071C       |
| YLR386W                                          | VAC14         | YKL048C                 | ELM1          |
| YGR019W                                          | UGA1          | YBL021C                 | HAP3          |
| YGR270W                                          | YTA7          | YMR038C                 | CCS1          |
| YNL243W                                          | SLA2          | YOR132W                 | VPS17         |
| YGL147C                                          | RPL9A         | YKL116C                 | PRR1          |
| YDR004W                                          | RAD57         | YPL024W                 | RMI1          |
| YMR284W                                          | YKU70         | YDL013W                 | SLX5          |
| YLR083C                                          | EMP70         | YJR033C                 | RAV1          |
| YCL037C                                          | SRO9          | YGR071C                 | YGR071C       |

| Predictions at threshold level 0.75 continued... |               |                         |               |
|--------------------------------------------------|---------------|-------------------------|---------------|
| Gene1 of predicted pair                          |               | Gene2 of predicted pair |               |
| Systematic Name                                  | Standard Name | Systematic Name         | Standard Name |
| YML115C                                          | VAN1          | YPL089C                 | RLM1          |
| YNR072W                                          | HXT17         | YEL053C                 | MAK10         |
| YBR200W                                          | BEM1          | YFR040W                 | SAP155        |
| YLR441C                                          | RPS1A         | YOR043W                 | WHI2          |
| YOR132W                                          | VPS17         | YOL108C                 | INO4          |
| YBL058W                                          | SHP1          | YDR310C                 | SUM1          |
| YMR026C                                          | PEX12         | YDR207C                 | UME6          |
| YDL006W                                          | PTC1          | YAL030W                 | SNC1          |
| YNL106C                                          | INP52         | YGR072W                 | UPF3          |
| YKL139W                                          | CTK1          | YKL048C                 | ELM1          |
| YLR043C                                          | TRX1          | YOR106W                 | VAM3          |
| YDR335W                                          | MSN5          | YDR378C                 | LSM6          |
| YGL078C                                          | DBP3          | YML071C                 | COG8          |
| YKR001C                                          | VPS1          | YJL004C                 | SYS1          |
| YIL076W                                          | SEC28         | YLR452C                 | SST2          |
| YFR010W                                          | UBP6          | YGL115W                 | SNF4          |
| YKR095W                                          | MLP1          | YDR207C                 | UME6          |
| YOR195W                                          | SLK19         | YCR086W                 | CSM1          |
| YHR178W                                          | STB5          | YGL163C                 | RAD54         |
| YJL078C                                          | PRY3          | YOR071C                 | THI71         |
| YDR137W                                          | RGP1          | YBR127C                 | VMA2          |
| YJR056C                                          | YJR056C       | YKR099W                 | BAS1          |
| YGR217W                                          | CCH1          | YHR200W                 | RPN10         |
| YLR386W                                          | VAC14         | YGL003C                 | CDH1          |
| YOR008C                                          | SLG1          | YNL030W                 | HHF2          |
| YLR090W                                          | XDJ1          | YER116C                 | SLX8          |
| YDR080W                                          | VPS41         | YGL054C                 | ERV14         |
| YJL089W                                          | SIP4          | YPR119W                 | CLB2          |
| YLR095C                                          | IOC2          | YFR036W                 | CDC26         |

| Predictions at threshold level 0.75 continued... |               |                         |               |
|--------------------------------------------------|---------------|-------------------------|---------------|
| Gene1 of predicted pair                          |               | Gene2 of predicted pair |               |
| Systematic Name                                  | Standard Name | Systematic Name         | Standard Name |
| YDL020C                                          | RPN4          | YEL056W                 | HAT2          |
| YOR337W                                          | TEA1          | YJR094C                 | IME1          |
| YML115C                                          | VAN1          | YBL047C                 | EDE1          |
| YLR079W                                          | SIC1          | YER049W                 | TPA1          |
| YML115C                                          | VAN1          | YNR072W                 | HXT17         |
| YDR225W                                          | HTA1          | YMR038C                 | CCS1          |
| YDR379W                                          | RGA2          | YHR200W                 | RPN10         |
| YMR026C                                          | PEX12         | YNL214W                 | PEX17         |
| YNL153C                                          | GIM3          | YHR056C                 | RSC30         |
| YBR200W                                          | BEM1          | YBR260C                 | RGD1          |
| YKL032C                                          | IXR1          | YDL047W                 | SIT4          |
| YBL051C                                          | PIN4          | YHR114W                 | BZZ1          |
| YNL206C                                          | RTT106        | YGL163C                 | RAD54         |
| YJL060W                                          | BNA3          | YOR080W                 | DIA2          |
| YGL212W                                          | VAM7          | YDL223C                 | HBT1          |
| YOR001W                                          | RRP6          | YNL107W                 | YAF9          |
| YDR383C                                          | NKP1          | YDR156W                 | RPA14         |
| YDR156W                                          | RPA14         | YBR200W                 | BEM1          |
| YCR020C-A                                        | MAK31         | YCL001W                 | RER1          |
| YGR108W                                          | CLB1          | YOR001W                 | RRP6          |
| YPR040W                                          | TIP41         | YHR115C                 | DMA1          |
| YPR171W                                          | BSP1          | YDR245W                 | MNN10         |
| YLR148W                                          | PEP3          | YJL029C                 | VPS53         |
| YMR205C                                          | PFK2          | YDL006W                 | PTC1          |
| YPL195W                                          | APL5          | YDL192W                 | ARF1          |
| YER096W                                          | SHC1          | YEL036C                 | ANP1          |
| YDR245W                                          | MNN10         | YCR088W                 | ABP1          |
| YDR245W                                          | MNN10         | YBR131W                 | CCZ1          |
| YHR013C                                          | ARD1          | YFR030W                 | MET10         |

| Predictions at threshold level 0.75 continued... |               |                         |               |
|--------------------------------------------------|---------------|-------------------------|---------------|
| Gene1 of predicted pair                          |               | Gene2 of predicted pair |               |
| Systematic Name                                  | Standard Name | Systematic Name         | Standard Name |
| YML038C                                          | YMD8          | YML071C                 | COG8          |
| YDR156W                                          | RPA14         | YKL139W                 | CTK1          |
| YML038C                                          | YMD8          | YDL077C                 | VAM6          |
| YPL240C                                          | HSP82         | YBL071W-A               | KTI11         |
| YLR320W                                          | MMS22         | YJR084W                 | CSN12         |
| YFR031C-A                                        | RPL2A         | YGL054C                 | ERV14         |
| YAL024C                                          | LTE1          | YLR095C                 | IOC2          |
| YOR033C                                          | EXO1          | YML102W                 | CAC2          |
| YHR156C                                          | LIN1          | YDR358W                 | GGA1          |
| YBR107C                                          | IML3          | YLR032W                 | RAD5          |
| YOR275C                                          | RIM20         | YDL006W                 | PTC1          |
| YMR026C                                          | PEX12         | YLR094C                 | GIS3          |
| YML095C                                          | RAD10         | YLR447C                 | VMA6          |
| YER161C                                          | SPT2          | YIR005W                 | IST3          |
| YBR188C                                          | NTC20         | YPL213W                 | LEA1          |
| YDL116W                                          | NUP84         | YFR036W                 | CDC26         |
| YPL161C                                          | BEM4          | YGR152C                 | RSR1          |
| YLR192C                                          | HCR1          | YLR094C                 | GIS3          |
| YBL019W                                          | APN2          | YOL043C                 | NTG2          |
| YPL001W                                          | HAT1          | YBR036C                 | CSG2          |
| YKL048C                                          | ELM1          | YHR013C                 | ARD1          |
| YPL161C                                          | BEM4          | YDR310C                 | SUM1          |
| YDR335W                                          | MSN5          | YLR254C                 | NDL1          |
| YMR199W                                          | CLN1          | YER096W                 | SHC1          |
| YKR057W                                          | RPS21A        | YHR115C                 | DMA1          |
| YAL024C                                          | LTE1          | YIL076W                 | SEC28         |
| YJL127C                                          | SPT10         | YLR182W                 | SWI6          |
| YDL002C                                          | NHP10         | YEL056W                 | HAT2          |
| YML001W                                          | YPT7          | YNL127W                 | FAR11         |

| Predictions at threshold level 0.75 continued... |               |                         |               |
|--------------------------------------------------|---------------|-------------------------|---------------|
| Gene1 of predicted pair                          |               | Gene2 of predicted pair |               |
| Systematic Name                                  | Standard Name | Systematic Name         | Standard Name |
| YFR031C-A                                        | RPL2A         | YML001W                 | YPT7          |
| YJR033C                                          | RAV1          | YLR309C                 | IMH1          |
| YKL139W                                          | CTK1          | YDR440W                 | DOT1          |
| YIL076W                                          | SEC28         | YER122C                 | GLO3          |
| YCR088W                                          | ABP1          | YLR396C                 | VPS33         |
| YDL020C                                          | RPN4          | YKL101W                 | HSL1          |
| YNL248C                                          | RPA49         | YDR378C                 | LSM6          |
| YMR224C                                          | MRE11         | YBR171W                 | SEC66         |
| YKL213C                                          | DOA1          | YNL107W                 | YAF9          |
| YJL095W                                          | BCK1          | YEL056W                 | HAT2          |
| YER144C                                          | UBP5          | YKR035W-A               | DID2          |
| YPL024W                                          | RMI1          | YMR230W                 | RPS10B        |
| YBR107C                                          | IML3          | YNL307C                 | MCK1          |
| YNL288W                                          | CAF40         | YDR318W                 | MCM21         |
| YIL156W                                          | UBP7          | YLR064W                 | YLR064W       |
| YDL190C                                          | UFD2          | YMR276W                 | DSK2          |
| YOR358W                                          | HAP5          | YEL056W                 | HAT2          |
| YLR090W                                          | XDJ1          | YDR310C                 | SUM1          |
| YPL024W                                          | RMI1          | YCR086W                 | CSM1          |
| YGL147C                                          | RPL9A         | YOR327C                 | SNC2          |
| YMR133W                                          | REC114        | YDR261C                 | EXG2          |
| YGL212W                                          | VAM7          | YGL054C                 | ERV14         |
| YKL007W                                          | CAP1          | YGL124C                 | MON1          |
| YOR195W                                          | SLK19         | YDR200C                 | VPS64         |
| YDR389W                                          | SAC7          | YLR429W                 | CRN1          |
| YCL010C                                          | SGF29         | YPR072W                 | NOT5          |
| YDR484W                                          | VPS52         | YJL095W                 | BCK1          |
| YDR004W                                          | RAD57         | YNL297C                 | MON2          |
| YML095C                                          | RAD10         | YOR368W                 | RAD17         |



| Predictions at threshold level 0.75 continued... |               |                         |               |
|--------------------------------------------------|---------------|-------------------------|---------------|
| Gene1 of predicted pair                          |               | Gene2 of predicted pair |               |
| Systematic Name                                  | Standard Name | Systematic Name         | Standard Name |
| YDL083C                                          | RPS16B        | YOR327C                 | SNC2          |
| YLR386W                                          | VAC14         | YJL183W                 | MNN11         |
| YDR146C                                          | SWI5          | YPR111W                 | DBF20         |
| YNR032W                                          | PPG1          | YAL002W                 | VPS8          |
| YHR039C-A                                        | VMA10         | YEL060C                 | PRB1          |
| YKL139W                                          | CTK1          | YOL054W                 | PSH1          |
| YGL163C                                          | RAD54         | YGR188C                 | BUB1          |
| YBR194W                                          | SOY1          | YPR046W                 | MCM16         |
| YMR172W                                          | HOT1          | YDR183W                 | PLP1          |
| YPL024W                                          | RMI1          | YMR152W                 | YIM1          |
| YKL139W                                          | CTK1          | YML006C                 | GIS4          |
| YLR192C                                          | HCR1          | YNR072W                 | HXT17         |
| YMR026C                                          | PEX12         | YPL037C                 | EGD1          |
| YEL009C                                          | GCN4          | YER161C                 | SPT2          |
| YNL243W                                          | SLA2          | YKL113C                 | RAD27         |
| YDR507C                                          | GIN4          | YNL229C                 | URE2          |
| YDL116W                                          | NUP84         | YJL124C                 | LSM1          |
| YFR040W                                          | SAP155        | YMR109W                 | MYO5          |
| YOR327C                                          | SNC2          | YER040W                 | GLN3          |
| YNR052C                                          | POP2          | YPL152W                 | RRD2          |
| YNL079C                                          | TPM1          | YOR014W                 | RTS1          |
| YCL001W                                          | RER1          | YKR020W                 | VPS51         |
| YLR429W                                          | CRN1          | YDL047W                 | SIT4          |
| YGL200C                                          | EMP24         | YNL041C                 | COG6          |
| YER116C                                          | SLX8          | YDR335W                 | MSN5          |
| YGL147C                                          | RPL9A         | YMR152W                 | YIM1          |
| YPR120C                                          | CLB5          | YJL095W                 | BCK1          |
| YJL183W                                          | MNN11         | YFL048C                 | EMP47         |
| YML013W                                          | UBX2          | YKR001C                 | VPS1          |

| Predictions at threshold level 0.75 continued... |               |                         |               |
|--------------------------------------------------|---------------|-------------------------|---------------|
| Gene1 of predicted pair                          |               | Gene2 of predicted pair |               |
| Systematic Name                                  | Standard Name | Systematic Name         | Standard Name |
| YER122C                                          | GLO3          | YMR230W                 | RPS10B        |
| YBR057C                                          | MUM2          | YOL054W                 | PSH1          |
| YLR079W                                          | SIC1          | YPL178W                 | CBC2          |
| YER115C                                          | SPR6          | YFL047W                 | RGD2          |
| YOR270C                                          | VPH1          | YNL076W                 | MKS1          |
| YNL307C                                          | MCK1          | YML112W                 | CTK3          |
| YPL115C                                          | BEM3          | YGR108W                 | CLB1          |
| YCR066W                                          | RAD18         | YLR309C                 | IMH1          |
| YGL003C                                          | CDH1          | YBR280C                 | SAF1          |
| YDR293C                                          | SSD1          | YDL056W                 | MBP1          |
| YMR068W                                          | AVO2          | YBR270C                 | BIT2          |
| YDR144C                                          | MKC7          | YDR318W                 | MCM21         |
| YCR038C                                          | BUD5          | YPR122W                 | AXL1          |
| YJL124C                                          | LSM1          | YGL115W                 | SNF4          |
| YHR178W                                          | STB5          | YJL124C                 | LSM1          |
| YIL103W                                          | DPH1          | YGL252C                 | RTG2          |
| YDR293C                                          | SSD1          | YJL036W                 | SNX4          |
| YOL018C                                          | TLG2          | YAL002W                 | VPS8          |
| YPL024W                                          | RMI1          | YDR225W                 | HTA1          |
| YJL172W                                          | CPS1          | YLR370C                 | ARC18         |
| YJR090C                                          | GRR1          | YDR207C                 | UME6          |
| YIL113W                                          | SDP1          | YOR208W                 | PTP2          |
| YBR273C                                          | UBX7          | YPR119W                 | CLB2          |
| YPR036W                                          | VMA13         | YMR133W                 | REC114        |
| YPL024W                                          | RMI1          | YPL137C                 | GIP3          |
| YMR199W                                          | CLN1          | YOR014W                 | RTS1          |
| YGR108W                                          | CLB1          | YMR198W                 | CIK1          |
| YDR176W                                          | NGG1          | YGR252W                 | GCN5          |
| YDR293C                                          | SSD1          | YDR254W                 | CHL4          |

| Predictions at threshold level 0.75 continued... |               |                         |               |
|--------------------------------------------------|---------------|-------------------------|---------------|
| Gene1 of predicted pair                          |               | Gene2 of predicted pair |               |
| Systematic Name                                  | Standard Name | Systematic Name         | Standard Name |
| YBR126C                                          | TPS1          | YNL325C                 | FIG4          |
| YLR386W                                          | VAC14         | YEL056W                 | HAT2          |
| YOR043W                                          | WHI2          | YDR207C                 | UME6          |
| YPL129W                                          | TAF14         | YBR009C                 | HHF1          |
| YCL037C                                          | SRO9          | YCR077C                 | PAT1          |
| YLR119W                                          | SRN2          | YFR010W                 | UBP6          |
| YDR156W                                          | RPA14         | YLR234W                 | TOP3          |
| YDR245W                                          | MNN10         | YBL101C                 | ECM21         |
| YPL234C                                          | TFP3          | YPL195W                 | APL5          |
| YNL087W                                          | TCB2          | YMR016C                 | SOK2          |
| YDR293C                                          | SSD1          | YKR001C                 | VPS1          |
| YNL264C                                          | PDR17         | YMR089C                 | YTA12         |
| YHR178W                                          | STB5          | YBR278W                 | DPB3          |
| YBL047C                                          | EDE1          | YGR135W                 | PRE9          |
| YLR192C                                          | HCR1          | YEL060C                 | PRB1          |
| YAL024C                                          | LTE1          | YPL161C                 | BEM4          |
| YPR018W                                          | RLF2          | YPL253C                 | VIK1          |
| YPR131C                                          | NAT3          | YLR288C                 | MEC3          |
| YJR140C                                          | HIR3          | YLR135W                 | SLX4          |
| YNL288W                                          | CAF40         | YJR135C                 | MCM22         |
| YPR052C                                          | NHP6A         | YGR252W                 | GCN5          |
| YGR184C                                          | UBR1          | YKL101W                 | HSL1          |
| YCL037C                                          | SRO9          | YDL192W                 | ARF1          |
| YCR086W                                          | CSM1          | YOL090W                 | MSH2          |
| YGL115W                                          | SNF4          | YOL018C                 | TLG2          |
| YMR055C                                          | BUB2          | YOL067C                 | RTG1          |
| YLR360W                                          | VPS38         | YCL037C                 | SRO9          |
| YDL155W                                          | CLB3          | YLR032W                 | RAD5          |
| YKL006W                                          | RPL14A        | YDL155W                 | CLB3          |

| Predictions at threshold level 0.75 continued... |               |                         |               |
|--------------------------------------------------|---------------|-------------------------|---------------|
| Gene1 of predicted pair                          |               | Gene2 of predicted pair |               |
| Systematic Name                                  | Standard Name | Systematic Name         | Standard Name |
| YGR054W                                          | YGR054W       | YPR046W                 | MCM16         |
| YLR371W                                          | ROM2          | YBR280C                 | SAF1          |
| YLR035C                                          | MLH2          | YMR167W                 | MLH1          |
| YMR202W                                          | ERG2          | YLR425W                 | TUS1          |
| YGL078C                                          | DBP3          | YMR311C                 | GLC8          |
| YNL145W                                          | MFA2          | YCR077C                 | PAT1          |
| YPR030W                                          | CSR2          | YDR310C                 | SUM1          |
| YJR040W                                          | GEF1          | YER162C                 | RAD4          |
| YMR039C                                          | SUB1          | YDL185W                 | TFP1          |
| YPR017C                                          | DSS4          | YAR014C                 | BUD14         |
| YDL192W                                          | ARF1          | YMR214W                 | SCJ1          |
| YHR013C                                          | ARD1          | YFR036W                 | CDC26         |
| YLR337C                                          | VRP1          | YDR318W                 | MCM21         |
| YLR095C                                          | IOC2          | YMR133W                 | REC114        |
| YDR101C                                          | ARX1          | YHR052W                 | CIC1          |
| YML109W                                          | ZDS2          | YPR119W                 | CLB2          |
| YHR039C-A                                        | VMA10         | YOL018C                 | TLG2          |
| YBL021C                                          | HAP3          | YAL002W                 | VPS8          |
| YJR033C                                          | RAV1          | YPR032W                 | SRO7          |
| YDR108W                                          | GSG1          | YOL108C                 | INO4          |
| YNL078W                                          | NIS1          | YCL024W                 | KCC4          |
| YIL036W                                          | CST6          | YKL110C                 | KTI12         |
| YFR031C-A                                        | RPL2A         | YHR039C-A               | VMA10         |
| YFR040W                                          | SAP155        | YJL183W                 | MNN11         |
| YCL037C                                          | SRO9          | YER139C                 | YER139C       |
| YLR371W                                          | ROM2          | YCR053W                 | THR4          |
| YLR090W                                          | XDJ1          | YPR046W                 | MCM16         |
| YIR005W                                          | IST3          | YMR038C                 | CCS1          |
| YFL033C                                          | RIM15         | YKR030W                 | GMH1          |

| Predictions at threshold level 0.75 continued... |               |                         |               |
|--------------------------------------------------|---------------|-------------------------|---------------|
| Gene1 of predicted pair                          |               | Gene2 of predicted pair |               |
| Systematic Name                                  | Standard Name | Systematic Name         | Standard Name |
| YML006C                                          | GIS4          | YJR090C                 | GRR1          |
| YKL116C                                          | PRR1          | YDR358W                 | GGA1          |
| YBR171W                                          | SEC66         | YJL190C                 | RPS22A        |
| YDR443C                                          | SSN2          | YDL077C                 | VAM6          |
| YOR066W                                          | MSA1          | YDL192W                 | ARF1          |
| YHR156C                                          | LIN1          | YJL095W                 | BCK1          |
| YNL297C                                          | MON2          | YJL004C                 | SYS1          |
| YKR072C                                          | SIS2          | YER161C                 | SPT2          |
| YBR108W                                          | YBR108W       | YER040W                 | GLN3          |
| YDR004W                                          | RAD57         | YPL256C                 | CLN2          |
| YLR083C                                          | EMP70         | YDR293C                 | SSD1          |
| YGL147C                                          | RPL9A         | YCR053W                 | THR4          |
| YPR052C                                          | NHP6A         | YGR104C                 | SRB5          |
| YIL076W                                          | SEC28         | YDR484W                 | VPS52         |
| YMR172W                                          | HOT1          | YGL124C                 | MON1          |
| YGL200C                                          | EMP24         | YOR312C                 | RPL20B        |
| YFR024C-A                                        | LSB3          | YHR016C                 | YSC84         |
| YLR306W                                          | UBC12         | YDR139C                 | RUB1          |
| YLR216C                                          | CPR6          | YMR055C                 | BUB2          |
| YNL297C                                          | MON2          | YKR030W                 | GMH1          |
| YGL033W                                          | HOP2          | YHR200W                 | RPN10         |
| YNL215W                                          | IES2          | YKL213C                 | DOA1          |
| YKL101W                                          | HSL1          | YLR032W                 | RAD5          |
| YMR216C                                          | SKY1          | YPL195W                 | APL5          |
| YIL036W                                          | CST6          | YDR318W                 | MCM21         |
| YJR052W                                          | RAD7          | YNL230C                 | ELA1          |
| YDR176W                                          | NGG1          | YGL066W                 | SGF73         |
| YNL025C                                          | SSN8          | YDR289C                 | RTT103        |
| YOR023C                                          | AHC1          | YAR014C                 | BUD14         |

| Predictions at threshold level 0.75 continued... |               |                         |               |
|--------------------------------------------------|---------------|-------------------------|---------------|
| Gene1 of predicted pair                          |               | Gene2 of predicted pair |               |
| Systematic Name                                  | Standard Name | Systematic Name         | Standard Name |
| YDL059C                                          | RAD59         | YLR182W                 | SWI6          |
| YML115C                                          | VAN1          | YOR066W                 | MSA1          |
| YPL253C                                          | VIK1          | YNL236W                 | SIN4          |
| YNL206C                                          | RTT106        | YLR381W                 | CTF3          |
| YER144C                                          | UBP5          | YPL037C                 | EGD1          |
| YFL023W                                          | BUD27         | YHR010W                 | RPL27A        |
| YMR116C                                          | ASC1          | YDL006W                 | PTC1          |
| YNL291C                                          | MID1          | YDR254W                 | CHL4          |
| YNL243W                                          | SLA2          | YDR388W                 | RVS167        |
| YLR090W                                          | XDJ1          | YHR039C-A               | VMA10         |
| YDR225W                                          | HTA1          | YKL068W                 | NUP100        |
| YLR360W                                          | VPS38         | YNL297C                 | MON2          |
| YNL206C                                          | RTT106        | YML095C                 | RAD10         |
| YDL184C                                          | RPL41A        | YMR214W                 | SCJ1          |
| YPL129W                                          | TAF14         | YPR072W                 | NOT5          |
| YOR308C                                          | SNU66         | YLR350W                 | ORM2          |
| YFL013C                                          | IES1          | YPL057C                 | SUR1          |
| YJR063W                                          | RPA12         | YKL110C                 | KTI12         |
| YNL307C                                          | MCK1          | YGL252C                 | RTG2          |
| YFR030W                                          | MET10         | YOL081W                 | IRA2          |
| YBR200W                                          | BEM1          | YIR005W                 | IST3          |
| YAL024C                                          | LTE1          | YKR099W                 | BAS1          |
| YMR055C                                          | BUB2          | YHR111W                 | UBA4          |
| YEL065W                                          | SIT1          | YHR081W                 | LRP1          |
| YOL030W                                          | GAS5          | YCR086W                 | CSM1          |
| YLR119W                                          | SRN2          | YDR477W                 | SNF1          |
| YER044C-A                                        | MEI4          | YHR086W                 | NAM8          |
| YGL215W                                          | CLG1          | YGR105W                 | VMA21         |
| YOR106W                                          | VAM3          | YBR260C                 | RGD1          |

| Predictions at threshold level 0.75 continued... |               |                         |               |
|--------------------------------------------------|---------------|-------------------------|---------------|
| Gene1 of predicted pair                          |               | Gene2 of predicted pair |               |
| Systematic Name                                  | Standard Name | Systematic Name         | Standard Name |
| YGR217W                                          | CCH1          | YDR245W                 | MNN10         |
| YNL054W                                          | VAC7          | YPL152W                 | RRD2          |
| YER096W                                          | SHC1          | YDR207C                 | UME6          |
| YGL223C                                          | COG1          | YPL234C                 | TFP3          |
| YPL161C                                          | BEM4          | YPR046W                 | MCM16         |
| YOR132W                                          | VPS17         | YDR320C                 | SWA2          |
| YPR101W                                          | SNT309        | YDR378C                 | LSM6          |
| YGL025C                                          | PGD1          | YBR019C                 | GAL10         |
| YJL172W                                          | CPS1          | YKL048C                 | ELM1          |
| YGL060W                                          | YBP2          | YJL127C                 | SPT10         |
| YDR318W                                          | MCM21         | YKL101W                 | HSL1          |
| YBL047C                                          | EDE1          | YGL031C                 | RPL24A        |
| YPL234C                                          | TFP3          | YEL051W                 | VMA8          |
| YGR040W                                          | KSS1          | YDR103W                 | STE5          |
| YML103C                                          | NUP188        | YDR183W                 | PLP1          |
| YMR142C                                          | RPL13B        | YJR032W                 | CPR7          |
| YGR135W                                          | PRE9          | YOL081W                 | IRA2          |
| YLR410W                                          | VIP1          | YPL152W                 | RRD2          |
| YPL246C                                          | RBD2          | YGL016W                 | KAP122        |
| YNL068C                                          | FKH2          | YDR379W                 | RGA2          |
| YNL307C                                          | MCK1          | YPL152W                 | RRD2          |
| YAL024C                                          | LTE1          | YGL078C                 | DBP3          |
| YPR046W                                          | MCM16         | YBR036C                 | CSG2          |
| YFR010W                                          | UBP6          | YLR350W                 | ORM2          |
| YPR131C                                          | NAT3          | YBR194W                 | SOY1          |
| YDR146C                                          | SWI5          | YBR274W                 | CHK1          |
| YLR234W                                          | TOP3          | YLR320W                 | MMS22         |
| YMR224C                                          | MRE11         | YCR086W                 | CSM1          |
| YDR156W                                          | RPA14         | YML112W                 | CTK3          |

| Predictions at threshold level 0.75 continued... |               |                         |               |
|--------------------------------------------------|---------------|-------------------------|---------------|
| Gene1 of predicted pair                          |               | Gene2 of predicted pair |               |
| Systematic Name                                  | Standard Name | Systematic Name         | Standard Name |
| YGL237C                                          | HAP2          | YJL095W                 | BCK1          |
| YHR134W                                          | WSS1          | YBR114W                 | RAD16         |
| YKR099W                                          | BAS1          | YER162C                 | RAD4          |
| YMR172W                                          | HOT1          | YPL253C                 | VIK1          |
| YLR192C                                          | HCR1          | YDR484W                 | VPS52         |
| YMR026C                                          | PEX12         | YPR030W                 | CSR2          |
| YML102W                                          | CAC2          | YDR207C                 | UME6          |
| YDR469W                                          | SDC1          | YGR188C                 | BUB1          |
| YLR320W                                          | MMS22         | YEL060C                 | PRB1          |
| YMR142C                                          | RPL13B        | YLR452C                 | SST2          |
| YER118C                                          | SHO1          | YML097C                 | VPS9          |
| YOR290C                                          | SNF2          | YDR071C                 | PAA1          |
| YPL161C                                          | BEM4          | YAL002W                 | VPS8          |
| YOR337W                                          | TEA1          | YMR311C                 | GLC8          |
| YPR046W                                          | MCM16         | YML112W                 | CTK3          |
| YHR108W                                          | GGA2          | YJL140W                 | RPB4          |
| YML016C                                          | PPZ1          | YDL047W                 | SIT4          |
| YPR017C                                          | DSS4          | YNL041C                 | COG6          |
| YFR031C-A                                        | RPL2A         | YBL058W                 | SHP1          |
| YLR192C                                          | HCR1          | YBR030W                 | YBR030W       |
| YOR127W                                          | RGA1          | YJR090C                 | GRR1          |
| YMR172W                                          | HOT1          | YLR447C                 | VMA6          |
| YNL218W                                          | MGS1          | YJR035W                 | RAD26         |
| YIR003W                                          | YIR003W       | YKL213C                 | DOA1          |
| YPL057C                                          | SUR1          | YJR084W                 | CSN12         |
| YDR146C                                          | SWI5          | YBR171W                 | SEC66         |
| YNL248C                                          | RPA49         | YBR107C                 | IML3          |
| YHR161C                                          | YAP1801       | YHR108W                 | GGA2          |
| YDL083C                                          | RPS16B        | YER162C                 | RAD4          |



| Predictions at threshold level 0.75 continued... |               |                         |               |
|--------------------------------------------------|---------------|-------------------------|---------------|
| Gene1 of predicted pair                          |               | Gene2 of predicted pair |               |
| Systematic Name                                  | Standard Name | Systematic Name         | Standard Name |
| YDL184C                                          | RPL41A        | YHR200W                 | RPN10         |
| YBR188C                                          | NTC20         | YGL174W                 | BUD13         |
| YJL154C                                          | VPS35         | YMR231W                 | PEP5          |
| YOR290C                                          | SNF2          | YNL030W                 | HHF2          |
| YNL107W                                          | YAF9          | YDR207C                 | UME6          |
| YJR063W                                          | RPA12         | YML112W                 | CTK3          |
| YOR106W                                          | VAM3          | YMR054W                 | STV1          |
| YBR217W                                          | ATG12         | YER116C                 | SLX8          |
| YLR079W                                          | SIC1          | YDL226C                 | GCS1          |
| YBL058W                                          | SHP1          | YDR137W                 | RGP1          |
| YIL076W                                          | SEC28         | YBR019C                 | GAL10         |
| YNL069C                                          | RPL16B        | YNL291C                 | MID1          |
| YOR127W                                          | RGA1          | YJL157C                 | FAR1          |
| YHL027W                                          | RIM101        | YPL234C                 | TFP3          |
| YMR311C                                          | GLC8          | YNL076W                 | MKS1          |
| YGL078C                                          | DBP3          | YBL025W                 | RRN10         |
| YGR081C                                          | SLX9          | YDL059C                 | RAD59         |
| YMR016C                                          | SOK2          | YKL126W                 | YPK1          |
| YDR293C                                          | SSD1          | YOL108C                 | INO4          |
| YBL017C                                          | PEP1          | YHR161C                 | YAP1801       |
| YDL059C                                          | RAD59         | YMR038C                 | CCS1          |
| YNL094W                                          | APP1          | YGR136W                 | LSB1          |
| YGR072W                                          | UPF3          | YOR112W                 | CEX1          |
| YMR039C                                          | SUB1          | YBL008W                 | HIR1          |
| YHR081W                                          | LRP1          | YGL003C                 | CDH1          |
| YAL024C                                          | LTE1          | YHR013C                 | ARD1          |
| YDR225W                                          | HTA1          | YMR284W                 | YKU70         |
| YLR386W                                          | VAC14         | YHR012W                 | VPS29         |
| YCR020C-A                                        | MAK31         | YML038C                 | YMD8          |

| Predictions at threshold level 0.75 continued... |               |                         |               |
|--------------------------------------------------|---------------|-------------------------|---------------|
| Gene1 of predicted pair                          |               | Gene2 of predicted pair |               |
| Systematic Name                                  | Standard Name | Systematic Name         | Standard Name |
| YNL238W                                          | KEX2          | YPR032W                 | SRO7          |
| YNL329C                                          | PEX6          | YKR020W                 | VPS51         |
| YBR171W                                          | SEC66         | YAR014C                 | BUD14         |
| YNL206C                                          | RTT106        | YJL095W                 | BCK1          |
| YIL159W                                          | BNR1          | YGL078C                 | DBP3          |
| YIL159W                                          | BNR1          | YER118C                 | SHO1          |
| YML095C                                          | RAD10         | YGR270W                 | YTA7          |
| YFL013C                                          | IES1          | YOR038C                 | HIR2          |
| YFL023W                                          | BUD27         | YGL003C                 | CDH1          |
| YMR216C                                          | SKY1          | YMR054W                 | STV1          |
| YLR079W                                          | SIC1          | YLR386W                 | VAC14         |
| YLR090W                                          | XDJ1          | YLR192C                 | HCR1          |
| YNL215W                                          | IES2          | YPL180W                 | TCO89         |
| YOR290C                                          | SNF2          | YFL023W                 | BUD27         |
| YOR080W                                          | DIA2          | YMR202W                 | ERG2          |
| YOL018C                                          | TLG2          | YKL119C                 | VPH2          |
| YBR083W                                          | TEC1          | YDR358W                 | GGA1          |
| YDR363W-A                                        | SEM1          | YAR014C                 | BUD14         |
| YNL044W                                          | YIP3          | YGR105W                 | VMA21         |
| YJR056C                                          | YJR056C       | YCR053W                 | THR4          |
| YHR013C                                          | ARD1          | YMR089C                 | YTA12         |
| YPL195W                                          | APL5          | YOL018C                 | TLG2          |
| YIL076W                                          | SEC28         | YGL174W                 | BUD13         |
| YML001W                                          | YPT7          | YER162C                 | RAD4          |
| YLL039C                                          | UBI4          | YNR006W                 | VPS27         |
| YLR447C                                          | VMA6          | YIL008W                 | URM1          |
| YOR270C                                          | VPH1          | YKR035W-A               | DID2          |
| YGL033W                                          | HOP2          | YBR036C                 | CSG2          |
| YPL024W                                          | RMI1          | YNL307C                 | MCK1          |

| Predictions at threshold level 0.75 continued... |               |                         |               |
|--------------------------------------------------|---------------|-------------------------|---------------|
| Gene1 of predicted pair                          |               | Gene2 of predicted pair |               |
| Systematic Name                                  | Standard Name | Systematic Name         | Standard Name |
| YDR146C                                          | SWI5          | YOR368W                 | RAD17         |
| YPL042C                                          | SSN3          | YOR124C                 | UBP2          |
| YNL054W                                          | VAC7          | YNL225C                 | CNM67         |
| YAL020C                                          | ATS1          | YNL116W                 | DMA2          |
| YLR216C                                          | CPR6          | YDR254W                 | CHL4          |
| YGL033W                                          | HOP2          | YDL223C                 | HBT1          |
| YFR024C-A                                        | LSB3          | YLR144C                 | ACF2          |
| YPL024W                                          | RMI1          | YJR135C                 | MCM22         |
| YAL024C                                          | LTE1          | YNL058C                 | YNL058C       |
| YOR109W                                          | INP53         | YPL234C                 | TFP3          |
| YML103C                                          | NUP188        | YDR318W                 | MCM21         |
| YMR026C                                          | PEX12         | YML001W                 | YPT7          |
| YNL297C                                          | MON2          | YJR060W                 | CBF1          |
| YMR026C                                          | PEX12         | YNR072W                 | HXT17         |
| YMR055C                                          | BUB2          | YGL151W                 | NUT1          |
| YPR017C                                          | DSS4          | YNL293W                 | MSB3          |
| YDR129C                                          | SAC6          | YJL006C                 | CTK2          |
| YML115C                                          | VAN1          | YBR280C                 | SAF1          |
| YPL096C-A                                        | ERI1          | YBL007C                 | SLA1          |
| YLR337C                                          | VRP1          | YHR016C                 | YSC84         |
| YMR153W                                          | NUP53         | YPL037C                 | EGD1          |
| YMR224C                                          | MRE11         | YGL066W                 | SGF73         |
| YMR153W                                          | NUP53         | YGL025C                 | PGD1          |
| YPL024W                                          | RMI1          | YDR289C                 | RTT103        |
| YDL155W                                          | CLB3          | YDR318W                 | MCM21         |
| YPL253C                                          | VIK1          | YBR171W                 | SEC66         |
| YML071C                                          | COG8          | YDR310C                 | SUM1          |
| YGL087C                                          | MMS2          | YBL051C                 | PIN4          |
| YLR064W                                          | YLR064W       | YKR030W                 | GMH1          |

| Predictions at threshold level 0.75 continued... |               |                         |               |
|--------------------------------------------------|---------------|-------------------------|---------------|
| Gene1 of predicted pair                          |               | Gene2 of predicted pair |               |
| Systematic Name                                  | Standard Name | Systematic Name         | Standard Name |
| YDR108W                                          | GSG1          | YBR036C                 | CSG2          |
| YDL116W                                          | NUP84         | YDL155W                 | CLB3          |
| YDR004W                                          | RAD57         | YCR077C                 | PAT1          |
| YDL020C                                          | RPN4          | YOR368W                 | RAD17         |
| YAL024C                                          | LTE1          | YLR386W                 | VAC14         |
| YMR216C                                          | SKY1          | YLR309C                 | IMH1          |
| YMR109W                                          | MYO5          | YOR358W                 | HAP5          |
| YIL036W                                          | CST6          | YBR107C                 | IML3          |
| YLR337C                                          | VRP1          | YDR293C                 | SSD1          |
| YDR004W                                          | RAD57         | YBR274W                 | CHK1          |
| YDR293C                                          | SSD1          | YGL003C                 | CDH1          |
| YDR171W                                          | HSP42         | YJR035W                 | RAD26         |
| YBL078C                                          | ATG8          | YGL212W                 | VAM7          |
| YOR358W                                          | HAP5          | YPL018W                 | CTF19         |
| YKR072C                                          | SIS2          | YDR076W                 | RAD55         |
| YPL042C                                          | SSN3          | YDL005C                 | MED2          |
| YCR031C                                          | RPS14A        | YOL081W                 | IRA2          |
| YML103C                                          | NUP188        | YMR164C                 | MSS11         |
| YHR012W                                          | VPS29         | YHR114W                 | BZZ1          |
| YEL065W                                          | SIT1          | YHR156C                 | LIN1          |
| YGL133W                                          | ITC1          | YJL095W                 | BCK1          |
| YLR170C                                          | APS1          | YOR109W                 | INP53         |
| YLR441C                                          | RPS1A         | YDR207C                 | UME6          |
| YPL129W                                          | TAF14         | YJR140C                 | HIR3          |
| YFR030W                                          | MET10         | YLR254C                 | NDL1          |
| YBR057C                                          | MUM2          | YDL223C                 | HBT1          |
| YNL166C                                          | BNI5          | YJL190C                 | RPS22A        |
| YJR084W                                          | CSN12         | YNL076W                 | MKS1          |
| YNL199C                                          | GCR2          | YPL256C                 | CLN2          |

| Predictions at threshold level 0.75 continued... |               |                         |               |
|--------------------------------------------------|---------------|-------------------------|---------------|
| Gene1 of predicted pair                          |               | Gene2 of predicted pair |               |
| Systematic Name                                  | Standard Name | Systematic Name         | Standard Name |
| YMR284W                                          | YKU70         | YCR066W                 | RAD18         |
| YPL240C                                          | HSP82         | YEL022W                 | GEA2          |
| YJL154C                                          | VPS35         | YDR245W                 | MNN10         |
| YNL069C                                          | RPL16B        | YDR207C                 | UME6          |
| YMR198W                                          | CIK1          | YDR378C                 | LSM6          |
| YBR073W                                          | RDH54         | YDL013W                 | SLX5          |
| YDR129C                                          | SAC6          | YMR198W                 | CIK1          |
| YPR051W                                          | MAK3          | YPL018W                 | CTF19         |
| YLR360W                                          | VPS38         | YBR108W                 | YBR108W       |
| YJL151C                                          | SNA3          | YLR064W                 | YLR064W       |
| YNL058C                                          | YNL058C       | YBL025W                 | RRN10         |
| YOR270C                                          | VPH1          | YPL234C                 | TFP3          |
| YER144C                                          | UBP5          | YER040W                 | GLN3          |
| YGR054W                                          | YGR054W       | YPR163C                 | TIF3          |
| YNL307C                                          | MCK1          | YLR452C                 | SST2          |
| YLR102C                                          | APC9          | YPL256C                 | CLN2          |
| YPL037C                                          | EGD1          | YDL083C                 | RPS16B        |
| YIL076W                                          | SEC28         | YOR066W                 | MSA1          |
| YPR052C                                          | NHP6A         | YLR357W                 | RSC2          |
| YBR215W                                          | HPC2          | YAL002W                 | VPS8          |
| YDR293C                                          | SSD1          | YHR178W                 | STB5          |
| YOR043W                                          | WHI2          | YCR086W                 | CSM1          |
| YGL223C                                          | COG1          | YDR153C                 | ENT5          |
| YOR290C                                          | SNF2          | YJR084W                 | CSN12         |
| YLR119W                                          | SRN2          | YFL023W                 | BUD27         |
| YDL155W                                          | CLB3          | YHL002W                 | HSE1          |
| YBL102W                                          | SFT2          | YPL120W                 | VPS30         |
| YFR032C-A                                        | RPL29         | YJL117W                 | PHO86         |
| YDL077C                                          | VAM6          | YNL076W                 | MKS1          |

| Predictions at threshold level 0.75 continued... |               |                         |               |
|--------------------------------------------------|---------------|-------------------------|---------------|
| Gene1 of predicted pair                          |               | Gene2 of predicted pair |               |
| Systematic Name                                  | Standard Name | Systematic Name         | Standard Name |
| YNL069C                                          | RPL16B        | YML001W                 | YPT7          |
| YLR386W                                          | VAC14         | YMR055C                 | BUB2          |
| YKL025C                                          | PAN3          | YBR108W                 | YBR108W       |
| YPR017C                                          | DSS4          | YDL006W                 | PTC1          |
| YOR275C                                          | RIM20         | YHR158C                 | KEL1          |
| YFL023W                                          | BUD27         | YEL060C                 | PRB1          |
| YLR313C                                          | SPH1          | YJR035W                 | RAD26         |
| YHR161C                                          | YAP1801       | YJR125C                 | ENT3          |
| YDR174W                                          | HMO1          | YIL103W                 | DPH1          |
| YGR261C                                          | APL6          | YNL297C                 | MON2          |
| YGL212W                                          | VAM7          | YJL095W                 | BCK1          |
| YML016C                                          | PPZ1          | YJL006C                 | CTK2          |
| YPL057C                                          | SUR1          | YDL192W                 | ARF1          |
| YJL172W                                          | CPS1          | YLR452C                 | SST2          |
| YBR009C                                          | HHF1          | YDR440W                 | DOT1          |
| YLR234W                                          | TOP3          | YBR215W                 | HPC2          |
| YBR200W                                          | BEM1          | YKL110C                 | KTI12         |
| YOL111C                                          | MDY2          | YDL192W                 | ARF1          |
| YPL253C                                          | VIK1          | YNL079C                 | TPM1          |
| YML071C                                          | COG8          | YDL077C                 | VAM6          |
| YDR443C                                          | SSN2          | YOR337W                 | TEA1          |
| YFL033C                                          | RIM15         | YPR032W                 | SRO7          |
| YKR072C                                          | SIS2          | YLR352W                 | YLR352W       |
| YBR171W                                          | SEC66         | YOL111C                 | MDY2          |
| YMR026C                                          | PEX12         | YBR030W                 | YBR030W       |
| YHR149C                                          | SKG6          | YPL240C                 | HSP82         |
| YFR031C-A                                        | RPL2A         | YGR020C                 | VMA7          |
| YDR293C                                          | SSD1          | YDL155W                 | CLB3          |
| YKL126W                                          | YPK1          | YJR056C                 | YJR056C       |

| Predictions at threshold level 0.75 continued... |               |                         |               |
|--------------------------------------------------|---------------|-------------------------|---------------|
| Gene1 of predicted pair                          |               | Gene2 of predicted pair |               |
| Systematic Name                                  | Standard Name | Systematic Name         | Standard Name |
| YDR363W-A                                        | SEM1          | YML097C                 | VPS9          |
| YPR084W                                          | YPR084W       | YPL161C                 | BEM4          |
| YKR035W-A                                        | DID2          | YPL161C                 | BEM4          |
| YPL161C                                          | BEM4          | YKR020W                 | VPS51         |
| YFL023W                                          | BUD27         | YGL115W                 | SNF4          |
| YKL006W                                          | RPL14A        | YDR245W                 | MNN10         |
| YJL095W                                          | BCK1          | YNL116W                 | DMA2          |
| YLR371W                                          | ROM2          | YBL025W                 | RRN10         |
| YML115C                                          | VAN1          | YJL117W                 | PHO86         |
| YPR120C                                          | CLB5          | YCR086W                 | CSM1          |
| YNL248C                                          | RPA49         | YLR182W                 | SWI6          |
| YLR360W                                          | VPS38         | YMR109W                 | MYO5          |
| YJR056C                                          | YJR056C       | YNL307C                 | MCK1          |
| YNL041C                                          | COG6          | YPL137C                 | GIP3          |
| YDL155W                                          | CLB3          | YJR090C                 | GRR1          |
| YNL044W                                          | YIP3          | YPR028W                 | YOP1          |
| YNL248C                                          | RPA49         | YGL163C                 | RAD54         |
| YLR371W                                          | ROM2          | YDL077C                 | VAM6          |
| YFL033C                                          | RIM15         | YML001W                 | YPT7          |
| YNR052C                                          | POP2          | YDR335W                 | MSN5          |
| YER120W                                          | SCS2          | YPL195W                 | APL5          |
| YPL024W                                          | RMI1          | YOR195W                 | SLK19         |
| YJL183W                                          | MNN11         | YOL081W                 | IRA2          |
| YBR200W                                          | BEM1          | YNL293W                 | MSB3          |
| YGL237C                                          | HAP2          | YDR155C                 | CPR1          |
| YLL039C                                          | UBI4          | YKL041W                 | VPS24         |
| YER143W                                          | DDI1          | YOR036W                 | PEP12         |
| YJR084W                                          | CSN12         | YOL081W                 | IRA2          |
| YMR116C                                          | ASC1          | YBL101C                 | ECM21         |

| Predictions at threshold level 0.75 continued... |               |                         |               |
|--------------------------------------------------|---------------|-------------------------|---------------|
| Gene1 of predicted pair                          |               | Gene2 of predicted pair |               |
| Systematic Name                                  | Standard Name | Systematic Name         | Standard Name |
| YPL037C                                          | EGD1          | YDR310C                 | SUM1          |
| YPR036W                                          | VMA13         | YMR054W                 | STV1          |
| YGR108W                                          | CLB1          | YEL053C                 | MAK10         |
| YDR156W                                          | RPA14         | YNL116W                 | DMA2          |
| YBR215W                                          | HPC2          | YJR135C                 | MCM22         |
| YLR095C                                          | IOC2          | YKL116C                 | PRR1          |
| YOR337W                                          | TEA1          | YMR042W                 | ARG80         |
| YKR072C                                          | SIS2          | YER116C                 | SLX8          |
| YGL115W                                          | SNF4          | YML001W                 | YPT7          |
| YPR030W                                          | CSR2          | YOR035C                 | SHE4          |
| YBR107C                                          | IML3          | YPR120C                 | CLB5          |
| YNL186W                                          | UBP10         | YPR119W                 | CLB2          |
| YDR144C                                          | MKC7          | YEL056W                 | HAT2          |
| YBR171W                                          | SEC66         | YOR043W                 | WHI2          |
| YGL066W                                          | SGF73         | YMR055C                 | BUB2          |
| YDL223C                                          | HBT1          | YML001W                 | YPT7          |
| YGL124C                                          | MON1          | YOL081W                 | IRA2          |
| YDL020C                                          | RPN4          | YMR055C                 | BUB2          |
| YDR137W                                          | RGP1          | YGR188C                 | BUB1          |
| YNL215W                                          | IES2          | YDR146C                 | SWI5          |
| YJL036W                                          | SNX4          | YPR051W                 | MAK3          |
| YOR080W                                          | DIA2          | YDR254W                 | CHL4          |
| YDR378C                                          | LSM6          | YDR289C                 | RTT103        |
| YLL039C                                          | UBI4          | YDL155W                 | CLB3          |
| YLR360W                                          | VPS38         | YCR088W                 | ABP1          |
| YNL094W                                          | APP1          | YCR088W                 | ABP1          |
| YNL215W                                          | IES2          | YKL041W                 | VPS24         |
| YER116C                                          | SLX8          | YOR368W                 | RAD17         |
| YDL013W                                          | SLX5          | YJL187C                 | SWE1          |



| Predictions at threshold level 0.75 continued... |               |                         |               |
|--------------------------------------------------|---------------|-------------------------|---------------|
| Gene1 of predicted pair                          |               | Gene2 of predicted pair |               |
| Systematic Name                                  | Standard Name | Systematic Name         | Standard Name |
| YCL032W                                          | STE50         | YDL159W                 | STE7          |
| YKR072C                                          | SIS2          | YLR135W                 | SLX4          |
| YGR249W                                          | MGA1          | YOR327C                 | SNC2          |
| YJL095W                                          | BCK1          | YMR089C                 | YTA12         |
| YNL243W                                          | SLA2          | YML062C                 | MFT1          |
| YMR109W                                          | MYO5          | YDR183W                 | PLP1          |
| YDR265W                                          | PEX10         | YOL044W                 | PEX15         |
| YMR202W                                          | ERG2          | YOR327C                 | SNC2          |
| YLR441C                                          | RPS1A         | YOL081W                 | IRA2          |
| YDR156W                                          | RPA14         | YNL225C                 | CNM67         |
| YNL025C                                          | SSN8          | YDR477W                 | SNF1          |
| YER087C-B                                        | SBH1          | YML019W                 | OST6          |
| YLR288C                                          | MEC3          | YPL256C                 | CLN2          |
| YOR033C                                          | EXO1          | YGL100W                 | SEH1          |
| YBL058W                                          | SHP1          | YMR152W                 | YIM1          |
| YCR066W                                          | RAD18         | YKR020W                 | VPS51         |
| YOR290C                                          | SNF2          | YHR039C-A               | VMA10         |
| YCR086W                                          | CSM1          | YDR155C                 | CPR1          |
| YLR360W                                          | VPS38         | YDR323C                 | PEP7          |
| YOR106W                                          | VAM3          | YGR020C                 | VMA7          |
| YGL003C                                          | CDH1          | YGL124C                 | MON1          |
| YJR140C                                          | HIR3          | YOR043W                 | WHI2          |
| YLR135W                                          | SLX4          | YPL079W                 | RPL21B        |
| YOR112W                                          | CEX1          | YJL036W                 | SNX4          |
| YNL238W                                          | KEX2          | YNL051W                 | COG5          |
| YHR178W                                          | STB5          | YOR368W                 | RAD17         |
| YKL139W                                          | CTK1          | YKR030W                 | GMH1          |
| YNL106C                                          | INP52         | YNL307C                 | MCK1          |
| YLR386W                                          | VAC14         | YNL248C                 | RPA49         |

| Predictions at threshold level 0.75 continued... |               |                         |               |
|--------------------------------------------------|---------------|-------------------------|---------------|
| Gene1 of predicted pair                          |               | Gene2 of predicted pair |               |
| Systematic Name                                  | Standard Name | Systematic Name         | Standard Name |
| YDR383C                                          | NKP1          | YML103C                 | NUP188        |
| YBR215W                                          | HPC2          | YMR038C                 | CCS1          |
| YBL103C                                          | RTG3          | YHR081W                 | LRP1          |
| YEL053C                                          | MAK10         | YER120W                 | SCS2          |
| YLR315W                                          | NKP2          | YIL103W                 | DPH1          |
| YLR079W                                          | SIC1          | YKL048C                 | ELM1          |
| YCL037C                                          | SRO9          | YDR440W                 | DOT1          |
| YBR289W                                          | SNF5          | YOR038C                 | HIR2          |
| YPR051W                                          | MAK3          | YMR109W                 | MYO5          |
| YLR399C                                          | BDF1          | YDR254W                 | CHL4          |
| YFR031C-A                                        | RPL2A         | YJL053W                 | PEP8          |
| YER144C                                          | UBP5          | YHR060W                 | VMA22         |
| YBL102W                                          | SFT2          | YGR020C                 | VMA7          |
| YJL095W                                          | BCK1          | YMR214W                 | SCJ1          |
| YJR040W                                          | GEF1          | YEL051W                 | VMA8          |
| YLR119W                                          | SRN2          | YBR200W                 | BEM1          |
| YPR030W                                          | CSR2          | YBL025W                 | RRN10         |
| YGR108W                                          | CLB1          | YAL002W                 | VPS8          |
| YMR055C                                          | BUB2          | YDR363W-A               | SEM1          |
| YML012W                                          | ERV25         | YKR039W                 | GAP1          |
| YLL007C                                          | YLL007C       | YLR447C                 | VMA6          |
| YOR358W                                          | HAP5          | YGR054W                 | YGR054W       |
| YBR108W                                          | YBR108W       | YNL058C                 | YNL058C       |
| YBR171W                                          | SEC66         | YNL166C                 | BNI5          |
| YBR057C                                          | MUM2          | YML028W                 | TSA1          |
| YCR066W                                          | RAD18         | YGL054C                 | ERV14         |
| YOR083W                                          | WHI5          | YPL018W                 | CTF19         |
| YOR195W                                          | SLK19         | YNR052C                 | POP2          |
| YLR090W                                          | XDJ1          | YNL325C                 | FIG4          |

| Predictions at threshold level 0.75 continued... |               |                         |               |
|--------------------------------------------------|---------------|-------------------------|---------------|
| Gene1 of predicted pair                          |               | Gene2 of predicted pair |               |
| Systematic Name                                  | Standard Name | Systematic Name         | Standard Name |
| YLR135W                                          | SLX4          | YGL031C                 | RPL24A        |
| YMR224C                                          | MRE11         | YKL032C                 | IXR1          |
| YLR234W                                          | TOP3          | YHL002W                 | HSE1          |
| YMR116C                                          | ASC1          | YGR135W                 | PRE9          |
| YPL180W                                          | TCO89         | YDR363W-A               | SEM1          |
| YML071C                                          | COG8          | YMR230W                 | RPS10B        |
| YOR127W                                          | RGA1          | YNL238W                 | KEX2          |
| YDR484W                                          | VPS52         | YOL121C                 | RPS19A        |
| YDL020C                                          | RPN4          | YGL003C                 | CDH1          |
| YHL020C                                          | OPI1          | YDR153C                 | ENT5          |
| YDR225W                                          | HTA1          | YNL291C                 | MID1          |
| YJR084W                                          | CSN12         | YBR280C                 | SAF1          |
| YLL007C                                          | YLL007C       | YJL183W                 | MNN11         |
| YKL007W                                          | CAP1          | YGR152C                 | RSR1          |
| YKL020C                                          | SPT23         | YPR119W                 | CLB2          |
| YNL248C                                          | RPA49         | YNL225C                 | CNM67         |
| YJL154C                                          | VPS35         | YEL053C                 | MAK10         |
| YKL010C                                          | UFD4          | YBL101C                 | ECM21         |
| YDR443C                                          | SSN2          | YNL079C                 | TPM1          |
| YLR094C                                          | GIS3          | YJL183W                 | MNN11         |
| YBR041W                                          | FAT1          | YKR046C                 | PET10         |
| YLR381W                                          | CTF3          | YBR215W                 | HPC2          |
| YOL148C                                          | SPT20         | YPL248C                 | GAL4          |
| YBR107C                                          | IML3          | YOL067C                 | RTG1          |
| YMR199W                                          | CLN1          | YOL081W                 | IRA2          |
| YKL007W                                          | CAP1          | YKL204W                 | EAP1          |
| YNR058W                                          | BIO3          | YJR025C                 | BNA1          |
| YMR199W                                          | CLN1          | YMR038C                 | CCS1          |
| YBR171W                                          | SEC66         | YBR280C                 | SAF1          |

| Predictions at threshold level 0.75 continued... |               |                         |               |
|--------------------------------------------------|---------------|-------------------------|---------------|
| Gene1 of predicted pair                          |               | Gene2 of predicted pair |               |
| Systematic Name                                  | Standard Name | Systematic Name         | Standard Name |
| YDL002C                                          | NHP10         | YOR141C                 | ARP8          |
| YPL105C                                          | YPL105C       | YML071C                 | COG8          |
| YER110C                                          | KAP123        | YNL107W                 | YAF9          |
| YEL065W                                          | SIT1          | YDL077C                 | VAM6          |
| YLR410W                                          | VIP1          | YLR315W                 | NKP2          |
| YBR107C                                          | IML3          | YGR135W                 | PRE9          |
| YBL008W                                          | HIR1          | YKL101W                 | HSL1          |
| YGL033W                                          | HOP2          | YJL172W                 | CPS1          |
| YCL037C                                          | SRO9          | YDR289C                 | RTT103        |
| YDL020C                                          | RPN4          | YML102W                 | CAC2          |
| YMR095C                                          | SNO1          | YMR152W                 | YIM1          |
| YBR273C                                          | UBX7          | YJL048C                 | UBX6          |
| YLL039C                                          | UBI4          | YBL047C                 | EDE1          |
| YLR119W                                          | SRN2          | YBR030W                 | YBR030W       |
| YER116C                                          | SLX8          | YDL192W                 | ARF1          |
| YJL176C                                          | SWI3          | YOR290C                 | SNF2          |
| YFL023W                                          | BUD27         | YDR076W                 | RAD55         |
| YER087C-B                                        | SBH1          | YAR003W                 | SWD1          |
| YNL215W                                          | IES2          | YDR245W                 | MNN10         |
| YIL076W                                          | SEC28         | YPL057C                 | SUR1          |
| YIL076W                                          | SEC28         | YOL018C                 | TLG2          |
| YMR133W                                          | REC114        | YER040W                 | GLN3          |
| YNL058C                                          | YNL058C       | YMR311C                 | GLC8          |
| YMR153W                                          | NUP53         | YDR310C                 | SUM1          |
| YDL154W                                          | MSH5          | YMR167W                 | MLH1          |
| YHR056C                                          | RSC30         | YLR357W                 | RSC2          |
| YKL110C                                          | KTI12         | YFR030W                 | MET10         |
| YFR031C-A                                        | RPL2A         | YLR441C                 | RPS1A         |
| YKR099W                                          | BAS1          | YHR081W                 | LRP1          |

| Predictions at threshold level 0.75 continued... |               |                         |               |
|--------------------------------------------------|---------------|-------------------------|---------------|
| Gene1 of predicted pair                          |               | Gene2 of predicted pair |               |
| Systematic Name                                  | Standard Name | Systematic Name         | Standard Name |
| YDR289C                                          | RTT103        | YNL116W                 | DMA2          |
| YDL020C                                          | RPN4          | YBL021C                 | HAP3          |
| YBR171W                                          | SEC66         | YKR035W-A               | DID2          |
| YHR013C                                          | ARD1          | YJL140W                 | RPB4          |
| YLR381W                                          | CTF3          | YJL124C                 | LSM1          |
| YLR337C                                          | VRP1          | YEL056W                 | HAT2          |
| YMR224C                                          | MRE11         | YML001W                 | YPT7          |
| YMR142C                                          | RPL13B        | YGL003C                 | CDH1          |
| YOL121C                                          | RPS19A        | YDL192W                 | ARF1          |
| YPL253C                                          | VIK1          | YGL237C                 | HAP2          |
| YDL020C                                          | RPN4          | YPL057C                 | SUR1          |
| YGL100W                                          | SEH1          | YKL068W                 | NUP100        |
| YGL124C                                          | MON1          | YDR310C                 | SUM1          |
| YKL032C                                          | IXR1          | YBL047C                 | EDE1          |
| YOR001W                                          | RRP6          | YGR270W                 | YTA7          |
| YAL024C                                          | LTE1          | YER116C                 | SLX8          |
| YPR084W                                          | YPR084W       | YNR032W                 | PPG1          |
| YNL307C                                          | MCK1          | YNR072W                 | HXT17         |
| YHR178W                                          | STB5          | YBR108W                 | YBR108W       |
| YNL025C                                          | SSN8          | YDR363W-A               | SEM1          |
| YDR142C                                          | PEX7          | YLL061W                 | MMP1          |
| YMR216C                                          | SKY1          | YHR012W                 | VPS29         |
| YBR057C                                          | MUM2          | YGR184C                 | UBR1          |
| YDR254W                                          | CHL4          | YGR135W                 | PRE9          |
| YDR080W                                          | VPS41         | YNL051W                 | COG5          |
| YJL124C                                          | LSM1          | YDL059C                 | RAD59         |
| YNL051W                                          | COG5          | YEL042W                 | GDA1          |
| YMR095C                                          | SNO1          | YNR072W                 | HXT17         |
| YBR278W                                          | DPB3          | YCR077C                 | PAT1          |

| Predictions at threshold level 0.75 continued... |               |                         |               |
|--------------------------------------------------|---------------|-------------------------|---------------|
| Gene1 of predicted pair                          |               | Gene2 of predicted pair |               |
| Systematic Name                                  | Standard Name | Systematic Name         | Standard Name |
| YPL161C                                          | BEM4          | YDL083C                 | RPS16B        |
| YNR072W                                          | HXT17         | YMR038C                 | CCS1          |
| YNL288W                                          | CAF40         | YPL161C                 | BEM4          |
| YGR217W                                          | CCH1          | YKL048C                 | ELM1          |
| YMR198W                                          | CIK1          | YLR398C                 | SKI2          |
| YMR055C                                          | BUB2          | YPL161C                 | BEM4          |
| YPL089C                                          | RLM1          | YJL183W                 | MNN11         |
| YFR010W                                          | UBP6          | YOL081W                 | IRA2          |
| YBR278W                                          | DPB3          | YBR215W                 | HPC2          |
| YEL036C                                          | ANP1          | YDR207C                 | UME6          |
| YDL223C                                          | HBT1          | YBR019C                 | GAL10         |
| YLR058C                                          | SHM2          | YPL106C                 | SSE1          |
| YJR056C                                          | YJR056C       | YBR171W                 | SEC66         |
| YBL051C                                          | PIN4          | YJL183W                 | MNN11         |
| YJL176C                                          | SWI3          | YPL161C                 | BEM4          |
| YHR073W                                          | OSH3          | YMR273C                 | ZDS1          |
| YBL058W                                          | SHP1          | YBR171W                 | SEC66         |
| YHR060W                                          | VMA22         | YBR036C                 | CSG2          |
| YDR146C                                          | SWI5          | YCR086W                 | CSM1          |
| YGL178W                                          | MPT5          | YGL003C                 | CDH1          |
| YPR084W                                          | YPR084W       | YPR017C                 | DSS4          |
| YLR292C                                          | SEC72         | YJR032W                 | CPR7          |
| YNL215W                                          | IES2          | YLR079W                 | SIC1          |
| YGR054W                                          | YGR054W       | YNL107W                 | YAF9          |
| YLR234W                                          | TOP3          | YHR200W                 | RPN10         |
| YGL060W                                          | YBP2          | YNL236W                 | SIN4          |
| YPL037C                                          | EGD1          | YDL006W                 | PTC1          |
| YAR042W                                          | SWH1          | YDL065C                 | PEX19         |
| YDR443C                                          | SSN2          | YBR108W                 | YBR108W       |

| Predictions at threshold level 0.75 continued... |               |                         |               |
|--------------------------------------------------|---------------|-------------------------|---------------|
| Gene1 of predicted pair                          |               | Gene2 of predicted pair |               |
| Systematic Name                                  | Standard Name | Systematic Name         | Standard Name |
| YER161C                                          | SPT2          | YBR009C                 | HHF1          |
| YGL019W                                          | CKB1          | YOL081W                 | IRA2          |
| YFR030W                                          | MET10         | YPL018W                 | CTF19         |
| YIL156W                                          | UBP7          | YPL178W                 | CBC2          |
| YDR389W                                          | SAC7          | YBR200W                 | BEM1          |
| YDL080C                                          | THI3          | YMR224C                 | MRE11         |
| YKL126W                                          | YPK1          | YDR207C                 | UME6          |
| YGL190C                                          | CDC55         | YNL271C                 | BNI1          |
| YLR386W                                          | VAC14         | YDL223C                 | HBT1          |
| YGL190C                                          | CDC55         | YGL208W                 | SIP2          |
| YOL111C                                          | MDY2          | YOR035C                 | SHE4          |
| YDR129C                                          | SAC6          | YHL027W                 | RIM101        |
| YDR085C                                          | AFR1          | YBL085W                 | BOI1          |
| YCR081W                                          | SRB8          | YGL025C                 | PGD1          |
| YMR125W                                          | STO1          | YBL079W                 | NUP170        |
| YPR017C                                          | DSS4          | YOL108C                 | INO4          |
| YGL147C                                          | RPL9A         | YLR180W                 | SAM1          |
| YJL154C                                          | VPS35         | YOR069W                 | VPS5          |
| YBR127C                                          | VMA2          | YHR060W                 | VMA22         |
| YJL060W                                          | BNA3          | YPL018W                 | CTF19         |
| YOR337W                                          | TEA1          | YJL183W                 | MNN11         |
| YNL041C                                          | COG6          | YJR135C                 | MCM22         |
| YPL024W                                          | RMI1          | YBR173C                 | UMP1          |
| YMR179W                                          | SPT21         | YGL115W                 | SNF4          |
| YLR083C                                          | EMP70         | YJR040W                 | GEF1          |
| YLL007C                                          | YLL007C       | YDL020C                 | RPN4          |
| YJL124C                                          | LSM1          | YDR363W-A               | SEM1          |
| YBL102W                                          | SFT2          | YPR051W                 | MAK3          |
| YIL076W                                          | SEC28         | YDL002C                 | NHP10         |

| Predictions at threshold level 0.75 continued... |               |                         |               |
|--------------------------------------------------|---------------|-------------------------|---------------|
| Gene1 of predicted pair                          |               | Gene2 of predicted pair |               |
| Systematic Name                                  | Standard Name | Systematic Name         | Standard Name |
| YMR095C                                          | SNO1          | YGL115W                 | SNF4          |
| YKR099W                                          | BAS1          | YDL223C                 | HBT1          |
| YPL115C                                          | BEM3          | YBL051C                 | PIN4          |
| YBR111W-A                                        | SUS1          | YDR159W                 | SAC3          |
| YMR116C                                          | ASC1          | YBR041W                 | FAT1          |
| YLR094C                                          | GIS3          | YDL077C                 | VAM6          |
| YDR293C                                          | SSD1          | YML071C                 | COG8          |
| YGR249W                                          | MGA1          | YPL203W                 | TPK2          |
| YJL154C                                          | VPS35         | YMR216C                 | SKY1          |
| YGR072W                                          | UPF3          | YOR106W                 | VAM3          |
| YDL223C                                          | HBT1          | YDL192W                 | ARF1          |
| YLR337C                                          | VRP1          | YLR192C                 | HCR1          |
| YJL154C                                          | VPS35         | YLR309C                 | IMH1          |
| YKL025C                                          | PAN3          | YLR337C                 | VRP1          |
| YOR127W                                          | RGA1          | YKR030W                 | GMH1          |
| YCL001W                                          | RER1          | YPL195W                 | APL5          |
| YBL051C                                          | PIN4          | YHR012W                 | VPS29         |
| YLR095C                                          | IOC2          | YOR035C                 | SHE4          |
| YFR010W                                          | UBP6          | YCR077C                 | PAT1          |
| YPL090C                                          | RPS6A         | YOR078W                 | BUD21         |
| YKL139W                                          | CTK1          | YFR030W                 | MET10         |
| YMR172W                                          | HOT1          | YPL161C                 | BEM4          |
| YMR224C                                          | MRE11         | YBR030W                 | YBR030W       |
| YML115C                                          | VAN1          | YER116C                 | SLX8          |
| YLR119W                                          | SRN2          | YJL172W                 | CPS1          |
| YER115C                                          | SPR6          | YBL079W                 | NUP170        |
| YDR261C                                          | EXG2          | YGL003C                 | CDH1          |
| YJR060W                                          | CBF1          | YPR032W                 | SRO7          |
| YOR337W                                          | TEA1          | YNL032W                 | SIW14         |



| Predictions at threshold level 0.75 continued... |               |                         |               |
|--------------------------------------------------|---------------|-------------------------|---------------|
| Gene1 of predicted pair                          |               | Gene2 of predicted pair |               |
| Systematic Name                                  | Standard Name | Systematic Name         | Standard Name |
| YMR273C                                          | ZDS1          | YPL246C                 | RBD2          |
| YLR371W                                          | ROM2          | YEL060C                 | PRB1          |
| YFR024C-A                                        | LSB3          | YOR284W                 | HUA2          |
| YDR108W                                          | GSG1          | YFL033C                 | RIM15         |
| YHR086W                                          | NAM8          | YJR021C                 | REC107        |
| YIL076W                                          | SEC28         | YPR032W                 | SRO7          |
| YPL195W                                          | APL5          | YDL077C                 | VAM6          |
| YFL066C                                          | YFL066C       | YNL147W                 | LSM7          |
| YDR202C                                          | RAV2          | YOL018C                 | TLG2          |
| YGL003C                                          | CDH1          | YCR053W                 | THR4          |
| YDR484W                                          | VPS52         | YPR028W                 | YOP1          |
| YOR156C                                          | NFI1          | YNL107W                 | YAF9          |
| YDR293C                                          | SSD1          | YJR135C                 | MCM22         |
| YHR013C                                          | ARD1          | YLR315W                 | NKP2          |
| YMR125W                                          | STO1          | YPL256C                 | CLN2          |
| YGR275W                                          | RTT102        | YOR156C                 | NFI1          |
| YOR080W                                          | DIA2          | YGL200C                 | EMP24         |
| YJL172W                                          | CPS1          | YOL081W                 | IRA2          |
| YOR270C                                          | VPH1          | YDR310C                 | SUM1          |
| YDR440W                                          | DOT1          | YBR010W                 | HHT1          |
| YGR003W                                          | CUL3          | YJL204C                 | RCY1          |
| YDR293C                                          | SSD1          | YBL051C                 | PIN4          |
| YNL054W                                          | VAC7          | YKL110C                 | KTI12         |
| YHR156C                                          | LIN1          | YGL115W                 | SNF4          |
| YPL115C                                          | BEM3          | YMR127C                 | SAS2          |
| YNL069C                                          | RPL16B        | YDL006W                 | PTC1          |
| YLR119W                                          | SRN2          | YGL124C                 | MON1          |
| YLR398C                                          | SKI2          | YOL081W                 | IRA2          |
| YLR381W                                          | CTF3          | YGL250W                 | RMR1          |

| Predictions at threshold level 0.75 continued... |               |                         |               |
|--------------------------------------------------|---------------|-------------------------|---------------|
| Gene1 of predicted pair                          |               | Gene2 of predicted pair |               |
| Systematic Name                                  | Standard Name | Systematic Name         | Standard Name |
| YER044C                                          | ERG28         | YLR371W                 | ROM2          |
| YPR018W                                          | RLF2          | YLR234W                 | TOP3          |
| YBR258C                                          | SHG1          | YOL145C                 | CTR9          |
| YHR039C-A                                        | VMA10         | YBR280C                 | SAF1          |
| YAL024C                                          | LTE1          | YPR046W                 | MCM16         |
| YMR199W                                          | CLN1          | YML095C                 | RAD10         |
| YHR119W                                          | SET1          | YBR258C                 | SHG1          |
| YML016C                                          | PPZ1          | YLR350W                 | ORM2          |
| YGL115W                                          | SNF4          | YGL054C                 | ERV14         |
| YHR200W                                          | RPN10         | YJR135C                 | MCM22         |
| YGL200C                                          | EMP24         | YAL055W                 | PEX22         |
| YKR072C                                          | SIS2          | YGL175C                 | SAE2          |
| YLR093C                                          | NYV1          | YER139C                 | YER139C       |
| YHR156C                                          | LIN1          | YGL212W                 | VAM7          |
| YGL246C                                          | RAI1          | YDR025W                 | RPS11A        |
| YGL025C                                          | PGD1          | YPR030W                 | CSR2          |
| YER116C                                          | SLX8          | YDR310C                 | SUM1          |
| YJL154C                                          | VPS35         | YMR054W                 | STV1          |
| YDR260C                                          | SWM1          | YOL054W                 | PSH1          |
| YOR195W                                          | SLK19         | YLR315W                 | NKP2          |
| YNL199C                                          | GCR2          | YIR005W                 | IST3          |
| YPL161C                                          | BEM4          | YBR082C                 | UBC4          |
| YLL007C                                          | YLL007C       | YJR090C                 | GRR1          |
| YIL053W                                          | RHR2          | YBR036C                 | CSG2          |
| YNL054W                                          | VAC7          | YML016C                 | PPZ1          |
| YHR098C                                          | SFB3          | YBR231C                 | SWC5          |
| YBL046W                                          | PSY4          | YPR040W                 | TIP41         |
| YDR174W                                          | HMO1          | YLR182W                 | SWI6          |
| YDL116W                                          | NUP84         | YJR059W                 | PTK2          |

| Predictions at threshold level 0.75 continued... |               |                         |               |
|--------------------------------------------------|---------------|-------------------------|---------------|
| Gene1 of predicted pair                          |               | Gene2 of predicted pair |               |
| Systematic Name                                  | Standard Name | Systematic Name         | Standard Name |
| YGL003C                                          | CDH1          | YLR398C                 | SKI2          |
| YER162C                                          | RAD4          | YPL120W                 | VPS30         |
| YFL033C                                          | RIM15         | YJR060W                 | CBF1          |
| YJL053W                                          | PEP8          | YML001W                 | YPT7          |
| YBR030W                                          | YBR030W       | YPL137C                 | GIP3          |
| YDR309C                                          | GIC2          | YKR048C                 | NAP1          |
| YBR019C                                          | GAL10         | YNL076W                 | MKS1          |
| YHR134W                                          | WSS1          | YOR132W                 | VPS17         |
| YHR205W                                          | SCH9          | YGR063C                 | SPT4          |
| YLR313C                                          | SPH1          | YGL175C                 | SAE2          |
| YLL039C                                          | UBI4          | YHR108W                 | GGA2          |
| YIL036W                                          | CST6          | YJL006C                 | CTK2          |
| YER179W                                          | DMC1          | YLR044C                 | PDC1          |
| YBR200W                                          | BEM1          | YBR019C                 | GAL10         |
| YDL013W                                          | SLX5          | YGR188C                 | BUB1          |
| YDR439W                                          | LRS4          | YPL253C                 | VIK1          |
| YOR106W                                          | VAM3          | YGL237C                 | HAP2          |
| YLR043C                                          | TRX1          | YPL057C                 | SUR1          |
| YDR507C                                          | GIN4          | YDL047W                 | SIT4          |
| YOR033C                                          | EXO1          | YJR090C                 | GRR1          |
| YCR020C-A                                        | MAK31         | YIL076W                 | SEC28         |
| YML115C                                          | VAN1          | YER001W                 | MNN1          |
| YDR477W                                          | SNF1          | YPL057C                 | SUR1          |
| YDR202C                                          | RAV2          | YDL077C                 | VAM6          |
| YGL078C                                          | DBP3          | YGR249W                 | MGA1          |
| YLR150W                                          | STM1          | YMR038C                 | CCS1          |
| YML013W                                          | UBX2          | YNL297C                 | MON2          |
| YJL176C                                          | SWI3          | YLR425W                 | TUS1          |
| YDR156W                                          | RPA14         | YDR183W                 | PLP1          |

| Predictions at threshold level 0.75 continued... |               |                         |               |
|--------------------------------------------------|---------------|-------------------------|---------------|
| Gene1 of predicted pair                          |               | Gene2 of predicted pair |               |
| Systematic Name                                  | Standard Name | Systematic Name         | Standard Name |
| YPR131C                                          | NAT3          | YGR081C                 | SLX9          |
| YOR127W                                          | RGA1          | YKL032C                 | IXR1          |
| YLR234W                                          | TOP3          | YFL023W                 | BUD27         |
| YBR173C                                          | UMP1          | YLR192C                 | HCR1          |
| YBR108W                                          | YBR108W       | YDR183W                 | PLP1          |
| YIL159W                                          | BNR1          | YPL024W                 | RMI1          |
| YIL076W                                          | SEC28         | YJR060W                 | CBF1          |
| YGR020C                                          | VMA7          | YDL077C                 | VAM6          |
| YLR360W                                          | VPS38         | YDR183W                 | PLP1          |
| YIL159W                                          | BNR1          | YML071C                 | COG8          |
| YNL288W                                          | CAF40         | YML016C                 | PPZ1          |
| YGL180W                                          | ATG1          | YPR185W                 | ATG13         |
| YML016C                                          | PPZ1          | YGR188C                 | BUB1          |
| YIL076W                                          | SEC28         | YDR137W                 | RGP1          |
| YML038C                                          | YMD8          | YNL127W                 | FAR11         |
| YGL190C                                          | CDC55         | YKL114C                 | APN1          |
| YJL154C                                          | VPS35         | YDR456W                 | NHX1          |
| YHR013C                                          | ARD1          | YPR120C                 | CLB5          |
| YER120W                                          | SCS2          | YNR032W                 | PPG1          |
| YGL147C                                          | RPL9A         | YDR310C                 | SUM1          |
| YBR173C                                          | UMP1          | YLR234W                 | TOP3          |
| YGR104C                                          | SRB5          | YGL174W                 | BUD13         |
| YDL223C                                          | HBT1          | YLR425W                 | TUS1          |
| YOR132W                                          | VPS17         | YKR001C                 | VPS1          |
| YHR060W                                          | VMA22         | YPL161C                 | BEM4          |
| YOR001W                                          | RRP6          | YGL115W                 | SNF4          |
| YNR006W                                          | VPS27         | YLR128W                 | DCN1          |
| YMR054W                                          | STV1          | YER162C                 | RAD4          |
| YBR258C                                          | SHG1          | YOR156C                 | NFI1          |

| Predictions at threshold level 0.75 continued... |               |                         |               |
|--------------------------------------------------|---------------|-------------------------|---------------|
| Gene1 of predicted pair                          |               | Gene2 of predicted pair |               |
| Systematic Name                                  | Standard Name | Systematic Name         | Standard Name |
| YEL043W                                          | YEL043W       | YNR032W                 | PPG1          |
| YDR202C                                          | RAV2          | YDR080W                 | VPS41         |
| YJR040W                                          | GEF1          | YHR012W                 | VPS29         |
| YMR133W                                          | REC114        | YJR032W                 | CPR7          |
| YBR290W                                          | BSD2          | YDL155W                 | CLB3          |
| YHR200W                                          | RPN10         | YNL229C                 | URE2          |
| YLR441C                                          | RPS1A         | YMR133W                 | REC114        |
| YIL130W                                          | ASG1          | YDL156W                 | YDL156W       |
| YKL048C                                          | ELM1          | YDL006W                 | PTC1          |
| YBR138C                                          | YBR138C       | YMR022W                 | UBC7          |
| YOR109W                                          | INP53         | YPL037C                 | EGD1          |
| YML001W                                          | YPT7          | YPR030W                 | CSR2          |
| YKL135C                                          | APL2          | YOR069W                 | VPS5          |
| YER115C                                          | SPR6          | YML109W                 | ZDS2          |
| YMR133W                                          | REC114        | YMR214W                 | SCJ1          |
| YMR055C                                          | BUB2          | YHR114W                 | BZZ1          |
| YBR036C                                          | CSG2          | YDR310C                 | SUM1          |
| YML103C                                          | NUP188        | YMR199W                 | CLN1          |
| YML103C                                          | NUP188        | YJR090C                 | GRR1          |
| YDL184C                                          | RPL41A        | YFL023W                 | BUD27         |
| YLR320W                                          | MMS22         | YOR035C                 | SHE4          |
| YML058W                                          | SML1          | YBL088C                 | TEL1          |
| YBL103C                                          | RTG3          | YHR039C-A               | VMA10         |
| YPR049C                                          | ATG11         | YGL180W                 | ATG1          |
| YOR290C                                          | SNF2          | YPL057C                 | SUR1          |
| YJR135C                                          | MCM22         | YBR036C                 | CSG2          |
| YOR069W                                          | VPS5          | YJR060W                 | CBF1          |
| YIL036W                                          | CST6          | YNL116W                 | DMA2          |
| YGL223C                                          | COG1          | YOR327C                 | SNC2          |

| Predictions at threshold level 0.75 continued... |               |                         |               |
|--------------------------------------------------|---------------|-------------------------|---------------|
| Gene1 of predicted pair                          |               | Gene2 of predicted pair |               |
| Systematic Name                                  | Standard Name | Systematic Name         | Standard Name |
| YDL184C                                          | RPL41A        | YHR060W                 | VMA22         |
| YER114C                                          | BOI2          | YGL124C                 | MON1          |
| YDL116W                                          | NUP84         | YLR386W                 | VAC14         |
| YLR315W                                          | NKP2          | YAL002W                 | VPS8          |
| YHR200W                                          | RPN10         | YHR081W                 | LRP1          |
| YNL307C                                          | MCK1          | YMR055C                 | BUB2          |
| YJL060W                                          | BNA3          | YJL058C                 | BIT61         |
| YGL115W                                          | SNF4          | YDL226C                 | GCS1          |
| YPR046W                                          | MCM16         | YDL047W                 | SIT4          |
| YER116C                                          | SLX8          | YNL297C                 | MON2          |
| YBR131W                                          | CCZ1          | YLR043C                 | TRX1          |
| YFL013C                                          | IES1          | YPL129W                 | TAF14         |
| YDL227C                                          | HO            | YLL013C                 | PUF3          |
| YNL297C                                          | MON2          | YER120W                 | SCS2          |
| YGR135W                                          | PRE9          | YJL183W                 | MNN11         |
| YML058W                                          | SML1          | YKL114C                 | APN1          |
| YNL325C                                          | FIG4          | YOR043W                 | WHI2          |
| YLR386W                                          | VAC14         | YDR378C                 | LSM6          |
| YEL051W                                          | VMA8          | YER122C                 | GLO3          |
| YOR096W                                          | RPS7A         | YDR025W                 | RPS11A        |
| YPL161C                                          | BEM4          | YER120W                 | SCS2          |
| YFR010W                                          | UBP6          | YDR378C                 | LSM6          |
| YEL065W                                          | SIT1          | YMR214W                 | SCJ1          |
| YLR315W                                          | NKP2          | YMR038C                 | CCS1          |
| YJR010C-A                                        | SPC1          | YML019W                 | OST6          |
| YDR004W                                          | RAD57         | YCR086W                 | CSM1          |
| YBR030W                                          | YBR030W       | YNL058C                 | YNL058C       |
| YFL031W                                          | HAC1          | YOR036W                 | PEP12         |
| YGR019W                                          | UGA1          | YPR051W                 | MAK3          |

| Predictions at threshold level 0.75 continued... |               |                         |               |
|--------------------------------------------------|---------------|-------------------------|---------------|
| Gene1 of predicted pair                          |               | Gene2 of predicted pair |               |
| Systematic Name                                  | Standard Name | Systematic Name         | Standard Name |
| YGR072W                                          | UPF3          | YAR014C                 | BUD14         |
| YPL105C                                          | YPL105C       | YGL054C                 | ERV14         |
| YMR198W                                          | CIK1          | YGR188C                 | BUB1          |
| YOR112W                                          | CEX1          | YOR106W                 | VAM3          |
| YBL102W                                          | SFT2          | YER122C                 | GLO3          |
| YBR171W                                          | SEC66         | YNR072W                 | HXT17         |
| YJR032W                                          | CPR7          | YEL060C                 | PRB1          |
| YBR215W                                          | HPC2          | YER122C                 | GLO3          |
| YEL065W                                          | SIT1          | YNL307C                 | MCK1          |
| YBR215W                                          | HPC2          | YGL148W                 | ARO2          |
| YNL215W                                          | IES2          | YHR167W                 | THP2          |
| YGL031C                                          | RPL24A        | YDR207C                 | UME6          |
| YPR101W                                          | SNT309        | YPL213W                 | LEA1          |
| YOR195W                                          | SLK19         | YBR200W                 | BEM1          |
| YDR004W                                          | RAD57         | YML102W                 | CAC2          |
| YJR140C                                          | HIR3          | YER122C                 | GLO3          |
| YOR270C                                          | VPH1          | YCR053W                 | THR4          |
| YML103C                                          | NUP188        | YDR439W                 | LRS4          |
| YJL127C                                          | SPT10         | YPL161C                 | BEM4          |
| YHR134W                                          | WSS1          | YPL057C                 | SUR1          |
| YNL166C                                          | BNI5          | YMR055C                 | BUB2          |
| YGR104C                                          | SRB5          | YHR108W                 | GGA2          |
| YJR140C                                          | HIR3          | YLR350W                 | ORM2          |
| YMR198W                                          | CIK1          | YMR202W                 | ERG2          |
| YFR010W                                          | UBP6          | YPR120C                 | CLB5          |
| YDL020C                                          | RPN4          | YPL161C                 | BEM4          |
| YMR026C                                          | PEX12         | YNL238W                 | KEX2          |
| YDR137W                                          | RGP1          | YMR311C                 | GLC8          |
| YGL161C                                          | YIP5          | YJL124C                 | LSM1          |

| Predictions at threshold level 0.75 continued... |               |                         |               |
|--------------------------------------------------|---------------|-------------------------|---------------|
| Gene1 of predicted pair                          |               | Gene2 of predicted pair |               |
| Systematic Name                                  | Standard Name | Systematic Name         | Standard Name |
| YNL325C                                          | FIG4          | YER144C                 | UBP5          |
| YDR363W-A                                        | SEM1          | YOR308C                 | SNU66         |
| YDR293C                                          | SSD1          | YGR152C                 | RSR1          |
| YBR158W                                          | AMN1          | YLR309C                 | IMH1          |
| YDR144C                                          | MKC7          | YOL067C                 | RTG1          |
| YGL212W                                          | VAM7          | YMR311C                 | GLC8          |
| YKL110C                                          | KTI12         | YGL252C                 | RTG2          |
| YHR119W                                          | SET1          | YGR166W                 | KRE11         |
| YPR120C                                          | CLB5          | YOL081W                 | IRA2          |
| YPL115C                                          | BEM3          | YDR379W                 | RGA2          |
| YGR135W                                          | PRE9          | YLR425W                 | TUS1          |
| YLR386W                                          | VAC14         | YLR233C                 | EST1          |
| YBL102W                                          | SFT2          | YER120W                 | SCS2          |
| YMR224C                                          | MRE11         | YOR066W                 | MSA1          |
| YLR018C                                          | POM34         | YKR095W                 | MLP1          |
| YJR084W                                          | CSN12         | YDR207C                 | UME6          |
| YDR004W                                          | RAD57         | YJR084W                 | CSN12         |
| YNL069C                                          | RPL16B        | YNL107W                 | YAF9          |
| YNL199C                                          | GCR2          | YNL079C                 | TPM1          |
| YDR071C                                          | PAA1          | YBR010W                 | HHT1          |
| YGR108W                                          | CLB1          | YMR055C                 | BUB2          |
| YML103C                                          | NUP188        | YKL139W                 | CTK1          |
| YOR033C                                          | EXO1          | YMR224C                 | MRE11         |
| YOR127W                                          | RGA1          | YLR233C                 | EST1          |
| YHR111W                                          | UBA4          | YEL056W                 | HAT2          |
| YBR107C                                          | IML3          | YGR054W                 | YGR054W       |
| YKR035W-A                                        | DID2          | YDR261C                 | EXG2          |
| YIL005W                                          | EPS1          | YHR200W                 | RPN10         |
| YGL025C                                          | PGD1          | YDL005C                 | MED2          |



| Predictions at threshold level 0.75 continued... |               |                         |               |
|--------------------------------------------------|---------------|-------------------------|---------------|
| Gene1 of predicted pair                          |               | Gene2 of predicted pair |               |
| Systematic Name                                  | Standard Name | Systematic Name         | Standard Name |
| YJL004C                                          | SYS1          | YOR327C                 | SNC2          |
| YOR197W                                          | MCA1          | YPR154W                 | PIN3          |
| YLR447C                                          | VMA6          | YPR046W                 | MCM16         |
| YNL325C                                          | FIG4          | YML001W                 | YPT7          |
| YMR224C                                          | MRE11         | YOL054W                 | PSH1          |
| YPL024W                                          | RMI1          | YBR107C                 | IML3          |
| YGL253W                                          | HXK2          | YLR233C                 | EST1          |
| YER139C                                          | YER139C       | YLR398C                 | SKI2          |
| YER059W                                          | PCL6          | YPL219W                 | PCL8          |
| YJL176C                                          | SWI3          | YAL002W                 | VPS8          |
| YGR184C                                          | UBR1          | YDR335W                 | MSN5          |
| YLR148W                                          | PEP3          | YLR360W                 | VPS38         |
| YML095C                                          | RAD10         | YIL008W                 | URM1          |
| YHR205W                                          | SCH9          | YGR078C                 | PAC10         |
| YPR131C                                          | NAT3          | YLR079W                 | SIC1          |
| YFR010W                                          | UBP6          | YHR156C                 | LIN1          |
| YNL031C                                          | HHT2          | YBR009C                 | HHF1          |
| YOR109W                                          | INP53         | YDL077C                 | VAM6          |
| YNL291C                                          | MID1          | YDR320C                 | SWA2          |
| YML016C                                          | PPZ1          | YGR270W                 | YTA7          |
| YJR031C                                          | GEA1          | YDL226C                 | GCS1          |
| YGL174W                                          | BUD13         | YDR440W                 | DOT1          |
| YLR234W                                          | TOP3          | YLR381W                 | CTF3          |
| YGR108W                                          | CLB1          | YPL253C                 | VIK1          |
| YBR200W                                          | BEM1          | YDR137W                 | RGP1          |
| YGL147C                                          | RPL9A         | YFR010W                 | UBP6          |
| YAL024C                                          | LTE1          | YML001W                 | YPT7          |
| YDR176W                                          | NGG1          | YBL003C                 | HTA2          |
| YBR041W                                          | FAT1          | YBR082C                 | UBC4          |

| Predictions at threshold level 0.75 continued... |               |                         |               |
|--------------------------------------------------|---------------|-------------------------|---------------|
| Gene1 of predicted pair                          |               | Gene2 of predicted pair |               |
| Systematic Name                                  | Standard Name | Systematic Name         | Standard Name |
| YGR072W                                          | UPF3          | YDR108W                 | GSG1          |
| YER162C                                          | RAD4          | YNL051W                 | COG5          |
| YOR337W                                          | TEA1          | YFR036W                 | CDC26         |
| YFL023W                                          | BUD27         | YMR230W                 | RPS10B        |
| YKL048C                                          | ELM1          | YPL152W                 | RRD2          |
| YGR184C                                          | UBR1          | YHR013C                 | ARD1          |
| YGL025C                                          | PGD1          | YNL076W                 | MKS1          |
| YOL062C                                          | APM4          | YJR058C                 | APS2          |
| YDR254W                                          | CHL4          | YIR005W                 | IST3          |
| YGL115W                                          | SNF4          | YDR153C                 | ENT5          |
| YJL117W                                          | PHO86         | YGR135W                 | PRE9          |
| YBR057C                                          | MUM2          | YML115C                 | VAN1          |
| YOR132W                                          | VPS17         | YBR114W                 | RAD16         |
| YBR057C                                          | MUM2          | YDR260C                 | SWM1          |
| YBR108W                                          | YBR108W       | YMR127C                 | SAS2          |
| YLR043C                                          | TRX1          | YLR396C                 | VPS33         |
| YDR443C                                          | SSN2          | YCR084C                 | TUP1          |
| YDL184C                                          | RPL41A        | YKR026C                 | GCN3          |
| YLR058C                                          | SHM2          | YDR171W                 | HSP42         |
| YDR202C                                          | RAV2          | YKL119C                 | VPH2          |
| YPL256C                                          | CLN2          | YKL161C                 | YKL161C       |
| YGR072W                                          | UPF3          | YJL036W                 | SNX4          |
| YHR161C                                          | YAP1801       | YMR017W                 | SPO20         |
| YDL116W                                          | NUP84         | YHR010W                 | RPL27A        |
| YNL106C                                          | INP52         | YGR270W                 | YTA7          |
| YNL106C                                          | INP52         | YOR141C                 | ARP8          |
| YMR312W                                          | ELP6          | YBL071W-A               | KTI11         |
| YDR477W                                          | SNF1          | YKR035W-A               | DID2          |
| YGL212W                                          | VAM7          | YOR208W                 | PTP2          |

| Predictions at threshold level 0.75 continued... |               |                         |               |
|--------------------------------------------------|---------------|-------------------------|---------------|
| Gene1 of predicted pair                          |               | Gene2 of predicted pair |               |
| Systematic Name                                  | Standard Name | Systematic Name         | Standard Name |
| YBR019C                                          | GAL10         | YEL060C                 | PRB1          |
| YOR197W                                          | MCA1          | YLR206W                 | ENT2          |
| YDR320C                                          | SWA2          | YJR125C                 | ENT3          |
| YKR020W                                          | VPS51         | YDR310C                 | SUM1          |
| YML115C                                          | VAN1          | YHR200W                 | RPN10         |
| YOR290C                                          | SNF2          | YHR081W                 | LRP1          |
| YMR055C                                          | BUB2          | YDR155C                 | CPR1          |
| YBR108W                                          | YBR108W       | YNL238W                 | KEX2          |
| YKL139W                                          | CTK1          | YBR019C                 | GAL10         |
| YBR114W                                          | RAD16         | YDR310C                 | SUM1          |
| YOR270C                                          | VPH1          | YNL238W                 | KEX2          |
| YEL056W                                          | HAT2          | YNL107W                 | YAF9          |
| YMR224C                                          | MRE11         | YML097C                 | VPS9          |
| YHR052W                                          | CIC1          | YIL133C                 | RPL16A        |
| YEL009C                                          | GCN4          | YHR079C                 | IRE1          |
| YHL020C                                          | OPI1          | YGL115W                 | SNF4          |
| YNL032W                                          | SIW14         | YDL184C                 | RPL41A        |
| YMR142C                                          | RPL13B        | YOL111C                 | MDY2          |
| YDR469W                                          | SDC1          | YER122C                 | GLO3          |
| YKR059W                                          | TIF1          | YLR234W                 | TOP3          |
| YNL215W                                          | IES2          | YHR111W                 | UBA4          |
| YBR217W                                          | ATG12         | YPL149W                 | ATG5          |
| YBR195C                                          | MSI1          | YGL151W                 | NUT1          |
| YPR167C                                          | MET16         | YGR209C                 | TRX2          |
| YLR079W                                          | SIC1          | YJR005W                 | APL1          |
| YBR057C                                          | MUM2          | YJL095W                 | BCK1          |
| YOR033C                                          | EXO1          | YBR082C                 | UBC4          |
| YDR320C                                          | SWA2          | YNL127W                 | FAR11         |
| YKR001C                                          | VPS1          | YNL127W                 | FAR11         |

| Predictions at threshold level 0.75 continued... |               |                         |               |
|--------------------------------------------------|---------------|-------------------------|---------------|
| Gene1 of predicted pair                          |               | Gene2 of predicted pair |               |
| Systematic Name                                  | Standard Name | Systematic Name         | Standard Name |
| YIL076W                                          | SEC28         | YEL060C                 | PRB1          |
| YJR083C                                          | ACF4          | YLR144C                 | ACF2          |
| YNL139C                                          | RLR1          | YNL004W                 | HRB1          |
| YNL025C                                          | SSN8          | YLR182W                 | SWI6          |
| YGL033W                                          | HOP2          | YGR249W                 | MGA1          |
| YFL023W                                          | BUD27         | YHR039C-A               | VMA10         |
| YBL058W                                          | SHP1          | YNL032W                 | SIW14         |
| YNL032W                                          | SIW14         | YBR108W                 | YBR108W       |
| YLR441C                                          | RPS1A         | YDL223C                 | HBT1          |
| YBR200W                                          | BEM1          | YEL043W                 | YEL043W       |
| YLR216C                                          | CPR6          | YHR013C                 | ARD1          |
| YIL159W                                          | BNR1          | YLR192C                 | HCR1          |
| YMR224C                                          | MRE11         | YLR352W                 | YLR352W       |
| YPL152W                                          | RRD2          | YOR141C                 | ARP8          |
| YBR217W                                          | ATG12         | YNR072W                 | HXT17         |
| YGL153W                                          | PEX14         | YNL079C                 | TPM1          |
| YML038C                                          | YMD8          | YDR207C                 | UME6          |
| YJR140C                                          | HIR3          | YDR378C                 | LSM6          |
| YFR010W                                          | UBP6          | YDR254W                 | CHL4          |
| YKL010C                                          | UFD4          | YFR010W                 | UBP6          |
| YMR224C                                          | MRE11         | YDR254W                 | CHL4          |
| YOR337W                                          | TEA1          | YNR072W                 | HXT17         |
| YDR080W                                          | VPS41         | YML038C                 | YMD8          |
| YLR119W                                          | SRN2          | YJL095W                 | BCK1          |
| YAL024C                                          | LTE1          | YEL053C                 | MAK10         |
| YBR200W                                          | BEM1          | YDR363W-A               | SEM1          |
| YLR093C                                          | NYV1          | YEL036C                 | ANP1          |
| YLR079W                                          | SIC1          | YFL047W                 | RGD2          |
| YPL240C                                          | HSP82         | YHR071W                 | PCL5          |

| Predictions at threshold level 0.75 continued... |               |                         |               |
|--------------------------------------------------|---------------|-------------------------|---------------|
| Gene1 of predicted pair                          |               | Gene2 of predicted pair |               |
| Systematic Name                                  | Standard Name | Systematic Name         | Standard Name |
| YPL140C                                          | MKK2          | YLR313C                 | SPH1          |
| YIL076W                                          | SEC28         | YBL103C                 | RTG3          |
| YML074C                                          | FPR3          | YGL019W                 | CKB1          |
| YGL147C                                          | RPL9A         | YML115C                 | VAN1          |
| YNL044W                                          | YIP3          | YDL192W                 | ARF1          |
| YJR056C                                          | YJR056C       | YGL212W                 | VAM7          |
| YEL050C                                          | RML2          | YLR429W                 | CRN1          |
| YNL206C                                          | RTT106        | YNL107W                 | YAF9          |
| YGR072W                                          | UPF3          | YIL076W                 | SEC28         |
| YLR083C                                          | EMP70         | YPR084W                 | YPR084W       |
| YDR245W                                          | MNN10         | YPL057C                 | SUR1          |
| YJR140C                                          | HIR3          | YFR021W                 | ATG18         |
| YDR156W                                          | RPA14         | YAR014C                 | BUD14         |
| YNL218W                                          | MGS1          | YOR033C                 | EXO1          |
| YDL223C                                          | HBT1          | YEL036C                 | ANP1          |
| YDL223C                                          | HBT1          | YER139C                 | YER139C       |
| YLR095C                                          | IOC2          | YPR036W                 | VMA13         |
| YDR320C                                          | SWA2          | YKR030W                 | GMH1          |
| YPR051W                                          | MAK3          | YPL105C                 | YPL105C       |
| YMR224C                                          | MRE11         | YJL176C                 | SWI3          |
| YJL204C                                          | RCY1          | YNR049C                 | MSO1          |
| YNL291C                                          | MID1          | YJL004C                 | SYS1          |
| YOR043W                                          | WHI2          | YLR320W                 | MMS22         |
| YDL020C                                          | RPN4          | YGL087C                 | MMS2          |
| YOR132W                                          | VPS17         | YOR023C                 | AHC1          |
| YPL096C-A                                        | ERI1          | YGR229C                 | SMI1          |
| YFR031C-A                                        | RPL2A         | YPR030W                 | CSR2          |
| YCR020C-A                                        | MAK31         | YPL105C                 | YPL105C       |
| YGL212W                                          | VAM7          | YNL058C                 | YNL058C       |

| Predictions at threshold level 0.75 continued... |               |                         |               |
|--------------------------------------------------|---------------|-------------------------|---------------|
| Gene1 of predicted pair                          |               | Gene2 of predicted pair |               |
| Systematic Name                                  | Standard Name | Systematic Name         | Standard Name |
| YDR004W                                          | RAD57         | YLR352W                 | YLR352W       |
| YLR095C                                          | IOC2          | YML071C                 | COG8          |
| YHR216W                                          | IMD2          | YGR262C                 | BUD32         |
| YLR315W                                          | NKP2          | YPL018W                 | CTF19         |
| YLR360W                                          | VPS38         | YKR014C                 | YPT52         |
| YOR127W                                          | RGA1          | YGL003C                 | CDH1          |
| YOR337W                                          | TEA1          | YOR304W                 | ISW2          |
| YPL129W                                          | TAF14         | YNL027W                 | CRZ1          |
| YDR181C                                          | SAS4          | YOR213C                 | SAS5          |
| YDR484W                                          | VPS52         | YDL083C                 | RPS16B        |
| YDR289C                                          | RTT103        | YDR183W                 | PLP1          |
| YGR020C                                          | VMA7          | YMR054W                 | STV1          |
| YKL139W                                          | CTK1          | YDR358W                 | GGA1          |
| YEL009C                                          | GCN4          | YDL005C                 | MED2          |
| YML016C                                          | PPZ1          | YIR005W                 | IST3          |
| YDR254W                                          | CHL4          | YLR410W                 | VIP1          |
| YDR440W                                          | DOT1          | YLR425W                 | TUS1          |
| YDR422C                                          | SIP1          | YPR119W                 | CLB2          |
| YBR200W                                          | BEM1          | YLR120C                 | YPS1          |
| YBR107C                                          | IML3          | YPR119W                 | CLB2          |
| YGL190C                                          | CDC55         | YPL256C                 | CLN2          |
| YBR215W                                          | HPC2          | YDR137W                 | RGP1          |
| YDR004W                                          | RAD57         | YHR178W                 | STB5          |
| YBR200W                                          | BEM1          | YJL172W                 | CPS1          |
| YPL253C                                          | VIK1          | YER096W                 | SHC1          |
| YMR142C                                          | RPL13B        | YEL060C                 | PRB1          |
| YBR200W                                          | BEM1          | YHL031C                 | GOS1          |
| YGL147C                                          | RPL9A         | YBR036C                 | CSG2          |
| YLR234W                                          | TOP3          | YML095C                 | RAD10         |

| Predictions at threshold level 0.75 continued... |               |                         |               |
|--------------------------------------------------|---------------|-------------------------|---------------|
| Gene1 of predicted pair                          |               | Gene2 of predicted pair |               |
| Systematic Name                                  | Standard Name | Systematic Name         | Standard Name |
| YHR205W                                          | SCH9          | YGL086W                 | MAD1          |
| YBR173C                                          | UMP1          | YJR032W                 | CPR7          |
| YNL041C                                          | COG6          | YMR054W                 | STV1          |
| YLR292C                                          | SEC72         | YAR014C                 | BUD14         |
| YKL139W                                          | CTK1          | YHL031C                 | GOS1          |
| YLR337C                                          | VRP1          | YBL021C                 | HAP3          |
| YGL178W                                          | MPT5          | YPR120C                 | CLB5          |
| YKL116C                                          | PRR1          | YDL077C                 | VAM6          |
| YDL020C                                          | RPN4          | YOR132W                 | VPS17         |
| YGL174W                                          | BUD13         | YOR124C                 | UBP2          |
| YBL051C                                          | PIN4          | YGL124C                 | MON1          |
| YBR019C                                          | GAL10         | YLR398C                 | SKI2          |
| YNL291C                                          | MID1          | YML038C                 | YMD8          |
| YNL215W                                          | IES2          | YOR124C                 | UBP2          |
| YLR360W                                          | VPS38         | YGR054W                 | YGR054W       |
| YGR104C                                          | SRB5          | YNL107W                 | YAF9          |
| YDL216C                                          | RRI1          | YMR025W                 | CSI1          |
| YOR106W                                          | VAM3          | YDR153C                 | ENT5          |
| YDR254W                                          | CHL4          | YLR452C                 | SST2          |
| YDR335W                                          | MSN5          | YBR107C                 | IML3          |
| YPL024W                                          | RMI1          | YJR056C                 | YJR056C       |
| YDR383C                                          | NKP1          | YIL036W                 | CST6          |
| YDR174W                                          | HMO1          | YAR014C                 | BUD14         |
| YJL053W                                          | PEP8          | YER120W                 | SCS2          |
| YMR153W                                          | NUP53         | YLR398C                 | SKI2          |
| YJR040W                                          | GEF1          | YPL195W                 | APL5          |
| YNL288W                                          | CAF40         | YNL166C                 | BNI5          |
| YPR084W                                          | YPR084W       | YNL069C                 | RPL16B        |
| YDL002C                                          | NHP10         | YLR315W                 | NKP2          |

| Predictions at threshold level 0.75 continued... |               |                         |               |
|--------------------------------------------------|---------------|-------------------------|---------------|
| Gene1 of predicted pair                          |               | Gene2 of predicted pair |               |
| Systematic Name                                  | Standard Name | Systematic Name         | Standard Name |
| YEL053C                                          | MAK10         | YOR066W                 | MSA1          |
| YPR046W                                          | MCM16         | YOR014W                 | RTS1          |
| YGL115W                                          | SNF4          | YAR014C                 | BUD14         |
| YDR245W                                          | MNN10         | YIR005W                 | IST3          |
| YDL042C                                          | SIR2          | YHR061C                 | GIC1          |
| YPL253C                                          | VIK1          | YNL166C                 | BNI5          |
| YOR032C                                          | HMS1          | YLR234W                 | TOP3          |
| YPL195W                                          | APL5          | YAR014C                 | BUD14         |
| YAL024C                                          | LTE1          | YLR254C                 | NDL1          |
| YKL116C                                          | PRR1          | YMR016C                 | SOK2          |
| YDR183W                                          | PLP1          | YGL151W                 | NUT1          |
| YNL068C                                          | FKH2          | YBL087C                 | RPL23A        |
| YOR112W                                          | CEX1          | YPR051W                 | MAK3          |
| YPL129W                                          | TAF14         | YLR357W                 | RSC2          |
| YDR183W                                          | PLP1          | YHR114W                 | BZZ1          |
| YOR290C                                          | SNF2          | YOL111C                 | MDY2          |
| YCL037C                                          | SRO9          | YHR060W                 | VMA22         |
| YNL215W                                          | IES2          | YHR200W                 | RPN10         |
| YDL116W                                          | NUP84         | YMR153W                 | NUP53         |
| YIL036W                                          | CST6          | YNL225C                 | CNM67         |
| YMR202W                                          | ERG2          | YNL107W                 | YAF9          |
| YML013W                                          | UBX2          | YOR368W                 | RAD17         |
| YPL115C                                          | BEM3          | YDR309C                 | GIC2          |
| YNL297C                                          | MON2          | YGR188C                 | BUB1          |
| YPR120C                                          | CLB5          | YNL236W                 | SIN4          |
| YBR217W                                          | ATG12         | YOL121C                 | RPS19A        |
| YEL050C                                          | RML2          | YMR198W                 | CIK1          |
| YDL223C                                          | HBT1          | YDR207C                 | UME6          |
| YDR318W                                          | MCM21         | YDL226C                 | GCS1          |



| Predictions at threshold level 0.75 continued... |               |                         |               |
|--------------------------------------------------|---------------|-------------------------|---------------|
| Gene1 of predicted pair                          |               | Gene2 of predicted pair |               |
| Systematic Name                                  | Standard Name | Systematic Name         | Standard Name |
| YPR101W                                          | SNT309        | YGR006W                 | PRP18         |
| YNL032W                                          | SIW14         | YPL137C                 | GIP3          |
| YBL008W                                          | HIR1          | YOR043W                 | WHI2          |
| YDR108W                                          | GSG1          | YDR080W                 | VPS41         |
| YGL066W                                          | SGF73         | YMR198W                 | CIK1          |
| YJR059W                                          | PTK2          | YGL016W                 | KAP122        |
| YER001W                                          | MNN1          | YPL050C                 | MNN9          |
| YMR153W                                          | NUP53         | YGL115W                 | SNF4          |
| YOR043W                                          | WHI2          | YOR308C                 | SNU66         |
| YLR234W                                          | TOP3          | YBR278W                 | DPB3          |
| YMR172W                                          | HOT1          | YOR127W                 | RGA1          |
| YMR054W                                          | STV1          | YPL195W                 | APL5          |
| YOL126C                                          | MDH2          | YGR059W                 | SPR3          |
| YMR216C                                          | SKY1          | YPL234C                 | TFP3          |
| YLL007C                                          | YLL007C       | YGR054W                 | YGR054W       |
| YGL174W                                          | BUD13         | YPL213W                 | LEA1          |
| YHR039C-A                                        | VMA10         | YMR152W                 | YIM1          |
| YDR318W                                          | MCM21         | YJL095W                 | BCK1          |
| YFR010W                                          | UBP6          | YOL121C                 | RPS19A        |
| YPR046W                                          | MCM16         | YMR038C                 | CCS1          |
| YOR069W                                          | VPS5          | YGL054C                 | ERV14         |
| YOR127W                                          | RGA1          | YHR114W                 | BZZ1          |
| YGL115W                                          | SNF4          | YJR033C                 | RAV1          |
| YDR477W                                          | SNF1          | YER139C                 | YER139C       |
| YML115C                                          | VAN1          | YDL155W                 | CLB3          |
| YBR127C                                          | VMA2          | YMR231W                 | PEP5          |
| YNL054W                                          | VAC7          | YHR111W                 | UBA4          |
| YGL223C                                          | COG1          | YFL031W                 | HAC1          |
| YDR108W                                          | GSG1          | YOR043W                 | WHI2          |

| Predictions at threshold level 0.75 continued... |               |                         |               |
|--------------------------------------------------|---------------|-------------------------|---------------|
| Gene1 of predicted pair                          |               | Gene2 of predicted pair |               |
| Systematic Name                                  | Standard Name | Systematic Name         | Standard Name |
| YGL161C                                          | YIP5          | YKR014C                 | YPT52         |
| YPL105C                                          | YPL105C       | YGL115W                 | SNF4          |
| YMR179W                                          | SPT21         | YDL226C                 | GCS1          |
| YDR289C                                          | RTT103        | YDR310C                 | SUM1          |
| YLR292C                                          | SEC72         | YGL124C                 | MON1          |
| YNL325C                                          | FIG4          | YPL195W                 | APL5          |
| YGR249W                                          | MGA1          | YKL126W                 | YPK1          |
| YPL120W                                          | VPS30         | YDL077C                 | VAM6          |
| YAL056W                                          | GPB2          | YOR371C                 | GPB1          |
| YFR031C-A                                        | RPL2A         | YBR108W                 | YBR108W       |
| YBR108W                                          | YBR108W       | YBR107C                 | IML3          |
| YGL115W                                          | SNF4          | YLR093C                 | NYV1          |
| YPR036W                                          | VMA13         | YPR120C                 | CLB5          |
| YNL215W                                          | IES2          | YFR010W                 | UBP6          |
| YKL126W                                          | YPK1          | YLR452C                 | SST2          |
| YKL007W                                          | CAP1          | YBL103C                 | RTG3          |
| YLR061W                                          | RPL22A        | YLR192C                 | HCR1          |
| YBR274W                                          | CHK1          | YGL094C                 | PAN2          |
| YBL058W                                          | SHP1          | YMR016C                 | SOK2          |
| YGL060W                                          | YBP2          | YML007W                 | YAP1          |
| YLR337C                                          | VRP1          | YEL044W                 | IES6          |
| YNL058C                                          | YNL058C       | YDR358W                 | GGA1          |
| YNL307C                                          | MCK1          | YIL103W                 | DPH1          |
| YDL083C                                          | RPS16B        | YJR032W                 | CPR7          |
| YBR200W                                          | BEM1          | YJR063W                 | RPA12         |
| YHR134W                                          | WSS1          | YHL002W                 | HSE1          |
| YPL024W                                          | RMI1          | YHR039C-A               | VMA10         |
| YLR148W                                          | PEP3          | YPR028W                 | YOP1          |
| YLR150W                                          | STM1          | YDL013W                 | SLX5          |

| Predictions at threshold level 0.75 continued... |               |                         |               |
|--------------------------------------------------|---------------|-------------------------|---------------|
| Gene1 of predicted pair                          |               | Gene2 of predicted pair |               |
| Systematic Name                                  | Standard Name | Systematic Name         | Standard Name |
| YKR020W                                          | VPS51         | YML097C                 | VPS9          |
| YBL047C                                          | EDE1          | YOR275C                 | RIM20         |
| YBR194W                                          | SOY1          | YMR055C                 | BUB2          |
| YNL329C                                          | PEX6          | YBL025W                 | RRN10         |
| YMR224C                                          | MRE11         | YPL018W                 | CTF19         |
| YOL148C                                          | SPT20         | YNL107W                 | YAF9          |
| YBR019C                                          | GAL10         | YOL081W                 | IRA2          |
| YMR224C                                          | MRE11         | YPR046W                 | MCM16         |
| YDR146C                                          | SWI5          | YCR077C                 | PAT1          |
| YJL095W                                          | BCK1          | YML028W                 | TSA1          |
| YFR010W                                          | UBP6          | YBL025W                 | RRN10         |
| YGR270W                                          | YTA7          | YLR182W                 | SWI6          |
| YDR320C                                          | SWA2          | YAR014C                 | BUD14         |
| YBR200W                                          | BEM1          | YKR061W                 | KTR2          |
| YBR258C                                          | SHG1          | YOR106W                 | VAM3          |
| YMR164C                                          | MSS11         | YPL256C                 | CLN2          |
| YNL041C                                          | COG6          | YGR105W                 | VMA21         |
| YGR104C                                          | SRB5          | YOL145C                 | CTR9          |
| YOR069W                                          | VPS5          | YEL053C                 | MAK10         |
| YNL069C                                          | RPL16B        | YPL195W                 | APL5          |
| YHR012W                                          | VPS29         | YJL190C                 | RPS22A        |
| YOR106W                                          | VAM3          | YOR109W                 | INP53         |
| YMR224C                                          | MRE11         | YLR386W                 | VAC14         |
| YKR014C                                          | YPT52         | YBL106C                 | SRO77         |
| YOL018C                                          | TLG2          | YNR032W                 | PPG1          |
| YLL039C                                          | UBI4          | YLR370C                 | ARC18         |
| YDR320C                                          | SWA2          | YER162C                 | RAD4          |
| YOR195W                                          | SLK19         | YDR289C                 | RTT103        |
| YLR441C                                          | RPS1A         | YMR152W                 | YIM1          |

| Predictions at threshold level 0.75 continued... |               |                         |               |
|--------------------------------------------------|---------------|-------------------------|---------------|
| Gene1 of predicted pair                          |               | Gene2 of predicted pair |               |
| Systematic Name                                  | Standard Name | Systematic Name         | Standard Name |
| YPL024W                                          | RMI1          | YPL057C                 | SUR1          |
| YKL139W                                          | CTK1          | YCR077C                 | PAT1          |
| YDR309C                                          | GIC2          | YNL293W                 | MSB3          |
| YBR173C                                          | UMP1          | YDL077C                 | VAM6          |
| YPL161C                                          | BEM4          | YPL120W                 | VPS30         |
| YHR203C                                          | RPS4B         | YBR189W                 | RPS9B         |
| YJL058C                                          | BIT61         | YBR107C                 | IML3          |
| YMR026C                                          | PEX12         | YER040W                 | GLN3          |
| YOR076C                                          | SKI7          | YOR001W                 | RRP6          |
| YKR061W                                          | KTR2          | YOR141C                 | ARP8          |
| YGL025C                                          | PGD1          | YNL031C                 | HHT2          |
| YLR061W                                          | RPL22A        | YLR360W                 | VPS38         |
| YJR099W                                          | YUH1          | YDR358W                 | GGA1          |
| YDL106C                                          | PHO2          | YDR146C                 | SWI5          |
| YNL041C                                          | COG6          | YNL107W                 | YAF9          |
| YDL020C                                          | RPN4          | YLR182W                 | SWI6          |
| YIL156W                                          | UBP7          | YIL148W                 | RPL40A        |
| YEL050C                                          | RML2          | YOR195W                 | SLK19         |
| YJL124C                                          | LSM1          | YER161C                 | SPT2          |
| YLR090W                                          | XDJ1          | YBR036C                 | CSG2          |
| YDL116W                                          | NUP84         | YLL026W                 | HSP104        |
| YDR448W                                          | ADA2          | YBR111W-A               | SUS1          |
| YDL216C                                          | RRI1          | YJR084W                 | CSN12         |
| YKL116C                                          | PRR1          | YOL081W                 | IRA2          |
| YML071C                                          | COG8          | YJL183W                 | MNN11         |
| YDR439W                                          | LRS4          | YDR289C                 | RTT103        |
| YKL048C                                          | ELM1          | YGL003C                 | CDH1          |
| YJL172W                                          | CPS1          | YPR030W                 | CSR2          |
| YPL042C                                          | SSN3          | YOR106W                 | VAM3          |

| Predictions at threshold level 0.75 continued... |               |                         |               |
|--------------------------------------------------|---------------|-------------------------|---------------|
| Gene1 of predicted pair                          |               | Gene2 of predicted pair |               |
| Systematic Name                                  | Standard Name | Systematic Name         | Standard Name |
| YNL215W                                          | IES2          | YPR046W                 | MCM16         |
| YHR013C                                          | ARD1          | YOR035C                 | SHE4          |
| YBR278W                                          | DPB3          | YDR146C                 | SWI5          |
| YPL161C                                          | BEM4          | YJL004C                 | SYS1          |
| YJL187C                                          | SWE1          | YOR327C                 | SNC2          |
| YKR072C                                          | SIS2          | YHR134W                 | WSS1          |
| YBR030W                                          | YBR030W       | YKL048C                 | ELM1          |
| YEL009C                                          | GCN4          | YDR225W                 | HTA1          |
| YNR052C                                          | POP2          | YNL206C                 | RTT106        |
| YKR059W                                          | TIF1          | YBR215W                 | HPC2          |
| YJL154C                                          | VPS35         | YDL226C                 | GCS1          |
| YGL175C                                          | SAE2          | YCR086W                 | CSM1          |
| YCR020C-A                                        | MAK31         | YKR030W                 | GMH1          |
| YGL174W                                          | BUD13         | YCL037C                 | SRO9          |
| YPL115C                                          | BEM3          | YHR061C                 | GIC1          |
| YDR448W                                          | ADA2          | YBR010W                 | HHT1          |
| YPL089C                                          | RLM1          | YBL101C                 | ECM21         |
| YDR477W                                          | SNF1          | YDL083C                 | RPS16B        |
| YPR017C                                          | DSS4          | YLR360W                 | VPS38         |
| YDR129C                                          | SAC6          | YMR116C                 | ASC1          |
| YPR046W                                          | MCM16         | YPL018W                 | CTF19         |
| YEL065W                                          | SIT1          | YPR030W                 | CSR2          |
| YMR224C                                          | MRE11         | YKL048C                 | ELM1          |
| YGL054C                                          | ERV14         | YDR310C                 | SUM1          |
| YJR040W                                          | GEF1          | YNL051W                 | COG5          |
| YLL007C                                          | YLL007C       | YGL087C                 | MMS2          |
| YNL307C                                          | MCK1          | YPR030W                 | CSR2          |
| YEL065W                                          | SIT1          | YJL183W                 | MNN11         |
| YPL037C                                          | EGD1          | YGL054C                 | ERV14         |

| Predictions at threshold level 0.75 continued... |               |                         |               |
|--------------------------------------------------|---------------|-------------------------|---------------|
| Gene1 of predicted pair                          |               | Gene2 of predicted pair |               |
| Systematic Name                                  | Standard Name | Systematic Name         | Standard Name |
| YDR004W                                          | RAD57         | YGL100W                 | SEH1          |
| YLR079W                                          | SIC1          | YMR202W                 | ERG2          |
| YNL054W                                          | VAC7          | YDR183W                 | PLP1          |
| YMR153W                                          | NUP53         | YMR125W                 | STO1          |
| YJR032W                                          | CPR7          | YLR371W                 | ROM2          |
| YFR036W                                          | CDC26         | YJL183W                 | MNN11         |
| YLR061W                                          | RPL22A        | YBL047C                 | EDE1          |
| YJR032W                                          | CPR7          | YGL253W                 | HXK2          |
| YAL024C                                          | LTE1          | YER044C                 | ERG28         |
| YNL041C                                          | COG6          | YLR180W                 | SAM1          |
| YBR171W                                          | SEC66         | YHR039C-A               | VMA10         |
| YOR270C                                          | VPH1          | YOR066W                 | MSA1          |
| YBR107C                                          | IML3          | YDL185W                 | TFP1          |
| YGL003C                                          | CDH1          | YGR188C                 | BUB1          |
| YLR083C                                          | EMP70         | YML038C                 | YMD8          |
| YOR284W                                          | HUA2          | YKR030W                 | GMH1          |
| YPL120W                                          | VPS30         | YOL108C                 | INO4          |
| YBR172C                                          | SMY2          | YKL074C                 | MUD2          |
| YMR142C                                          | RPL13B        | YNL041C                 | COG6          |
| YDR320C                                          | SWA2          | YCL001W                 | RER1          |
| YPR084W                                          | YPR084W       | YDR137W                 | RGP1          |
| YAL024C                                          | LTE1          | YGL148W                 | ARO2          |
| YDR448W                                          | ADA2          | YNL030W                 | HHF2          |
| YPL018W                                          | CTF19         | YAL002W                 | VPS8          |
| YDR261C                                          | EXG2          | YPL195W                 | APL5          |
| YHL025W                                          | SNF6          | YER161C                 | SPT2          |
| YNL297C                                          | MON2          | YER122C                 | GLO3          |
| YNL032W                                          | SIW14         | YPR046W                 | MCM16         |
| YOR132W                                          | VPS17         | YBL051C                 | PIN4          |

| Predictions at threshold level 0.75 continued... |               |                         |               |
|--------------------------------------------------|---------------|-------------------------|---------------|
| Gene1 of predicted pair                          |               | Gene2 of predicted pair |               |
| Systematic Name                                  | Standard Name | Systematic Name         | Standard Name |
| YNL218W                                          | MGS1          | YLR135W                 | SLX4          |
| YML016C                                          | PPZ1          | YJL095W                 | BCK1          |
| YGR249W                                          | MGA1          | YDL083C                 | RPS16B        |
| YIR005W                                          | IST3          | YCR077C                 | PAT1          |
| YMR152W                                          | YIM1          | YJL183W                 | MNN11         |
| YBL008W                                          | HIR1          | YEL056W                 | HAT2          |
| YCL037C                                          | SRO9          | YGR105W                 | VMA21         |
| YGR270W                                          | YTA7          | YOR124C                 | UBP2          |
| YOR127W                                          | RGA1          | YBL047C                 | EDE1          |
| YBL021C                                          | HAP3          | YHR111W                 | UBA4          |
| YOR043W                                          | WHI2          | YMR037C                 | MSN2          |
| YNL201C                                          | PSY2          | YDR383C                 | NKP1          |
| YJL154C                                          | VPS35         | YOR127W                 | RGA1          |
| YFR024C-A                                        | LSB3          | YPR171W                 | BSP1          |
| YHR098C                                          | SFB3          | YNL107W                 | YAF9          |
| YIR009W                                          | MSL1          | YBR114W                 | RAD16         |
| YGR105W                                          | VMA21         | YOL108C                 | INO4          |
| YDR245W                                          | MNN10         | YNL199C                 | GCR2          |
| YDR309C                                          | GIC2          | YCR086W                 | CSM1          |
| YIL076W                                          | SEC28         | YJL036W                 | SNX4          |
| YMR199W                                          | CLN1          | YBR084C-A               | RPL19A        |
| YOR014W                                          | RTS1          | YEL036C                 | ANP1          |
| YKL130C                                          | SHE2          | YBR130C                 | SHE3          |
| YPR154W                                          | PIN3          | YPR119W                 | CLB2          |
| YPR084W                                          | YPR084W       | YBR215W                 | HPC2          |
| YEL015W                                          | EDC3          | YBL066C                 | SEF1          |
| YGL134W                                          | PCL10         | YIL050W                 | PCL7          |
| YDR484W                                          | VPS52         | YOL081W                 | IRA2          |
| YBR127C                                          | VMA2          | YNL259C                 | ATX1          |

| Predictions at threshold level 0.75 continued... |               |                         |               |
|--------------------------------------------------|---------------|-------------------------|---------------|
| Gene1 of predicted pair                          |               | Gene2 of predicted pair |               |
| Systematic Name                                  | Standard Name | Systematic Name         | Standard Name |
| YMR153W                                          | NUP53         | YML001W                 | YPT7          |
| YBR200W                                          | BEM1          | YER096W                 | SHC1          |
| YOR023C                                          | AHC1          | YBR114W                 | RAD16         |
| YOR083W                                          | WHI5          | YDR318W                 | MCM21         |
| YJL154C                                          | VPS35         | YMR109W                 | MYO5          |
| YKL197C                                          | PEX1          | YNL329C                 | PEX6          |
| YBR036C                                          | CSG2          | YER040W                 | GLN3          |
| YGR100W                                          | MDR1          | YNL044W                 | YIP3          |
| YMR070W                                          | MOT3          | YBL047C                 | EDE1          |
| YNL218W                                          | MGS1          | YPL057C                 | SUR1          |
| YGR249W                                          | MGA1          | YFR036W                 | CDC26         |
| YJR032W                                          | CPR7          | YGL019W                 | CKB1          |
| YPR173C                                          | VPS4          | YJL004C                 | SYS1          |
| YNL058C                                          | YNL058C       | YLR180W                 | SAM1          |
| YPL246C                                          | RBD2          | YMR253C                 | YMR253C       |
| YPR029C                                          | APL4          | YDL192W                 | ARF1          |
| YPL001W                                          | HAT1          | YGL163C                 | RAD54         |
| YMR216C                                          | SKY1          | YGR020C                 | VMA7          |
| YGL135W                                          | RPL1B         | YLR192C                 | HCR1          |
| YGL223C                                          | COG1          | YCR053W                 | THR4          |
| YMR179W                                          | SPT21         | YML028W                 | TSA1          |
| YHR039C-A                                        | VMA10         | YGL151W                 | NUT1          |
| YPR051W                                          | MAK3          | YGL054C                 | ERV14         |
| YDL184C                                          | RPL41A        | YJL124C                 | LSM1          |
| YOR270C                                          | VPH1          | YLR320W                 | MMS22         |
| YOR270C                                          | VPH1          | YFL023W                 | BUD27         |
| YER042W                                          | MXR1          | YML028W                 | TSA1          |
| YGL200C                                          | EMP24         | YDR363W-A               | SEM1          |
| YLR095C                                          | IOC2          | YHR156C                 | LIN1          |



| Predictions at threshold level 0.75 continued... |               |                         |               |
|--------------------------------------------------|---------------|-------------------------|---------------|
| Gene1 of predicted pair                          |               | Gene2 of predicted pair |               |
| Systematic Name                                  | Standard Name | Systematic Name         | Standard Name |
| YJL053W                                          | PEP8          | YMR231W                 | PEP5          |
| YJR056C                                          | YJR056C       | YHR060W                 | VMA22         |
| YBL103C                                          | RTG3          | YDR310C                 | SUM1          |
| YPL152W                                          | RRD2          | YLR182W                 | SWI6          |
| YML115C                                          | VAN1          | YOL121C                 | RPS19A        |
| YDR137W                                          | RGP1          | YMR214W                 | SCJ1          |
| YMR026C                                          | PEX12         | YGR239C                 | PEX21         |
| YML013W                                          | UBX2          | YOR275C                 | RIM20         |
| YNL238W                                          | KEX2          | YDR153C                 | ENT5          |
| YBL101C                                          | ECM21         | YBL072C                 | RPS8A         |
| YOR270C                                          | VPH1          | YML001W                 | YPT7          |
| YPL050C                                          | MNN9          | YEL036C                 | ANP1          |
| YML112W                                          | CTK3          | YOR141C                 | ARP8          |
| YDR004W                                          | RAD57         | YFR010W                 | UBP6          |
| YJR032W                                          | CPR7          | YBR019C                 | GAL10         |
| YAL024C                                          | LTE1          | YDL020C                 | RPN4          |
| YDR293C                                          | SSD1          | YNL297C                 | MON2          |
| YKL025C                                          | PAN3          | YHR178W                 | STB5          |
| YGL066W                                          | SGF73         | YDL047W                 | SIT4          |
| YOR080W                                          | DIA2          | YKL041W                 | VPS24         |
| YPL178W                                          | CBC2          | YGR059W                 | SPR3          |
| YKL007W                                          | CAP1          | YJL187C                 | SWE1          |
| YFR031C-A                                        | RPL2A         | YBR173C                 | UMP1          |
| YFR010W                                          | UBP6          | YOR290C                 | SNF2          |
| YMR179W                                          | SPT21         | YGR184C                 | UBR1          |
| YPL057C                                          | SUR1          | YPL161C                 | BEM4          |
| YBR200W                                          | BEM1          | YOR327C                 | SNC2          |
| YMR199W                                          | CLN1          | YHR111W                 | UBA4          |
| YGL147C                                          | RPL9A         | YPL161C                 | BEM4          |

| Predictions at threshold level 0.75 continued... |               |                         |               |
|--------------------------------------------------|---------------|-------------------------|---------------|
| Gene1 of predicted pair                          |               | Gene2 of predicted pair |               |
| Systematic Name                                  | Standard Name | Systematic Name         | Standard Name |
| YNL025C                                          | SSN8          | YHL031C                 | GOS1          |
| YNL069C                                          | RPL16B        | YPL234C                 | TFP3          |
| YLR360W                                          | VPS38         | YMR198W                 | CIK1          |
| YJL036W                                          | SNX4          | YJL004C                 | SYS1          |
| YKR001C                                          | VPS1          | YGL054C                 | ERV14         |
| YKL139W                                          | CTK1          | YOR312C                 | RPL20B        |
| YNL069C                                          | RPL16B        | YEL053C                 | MAK10         |
| YOR132W                                          | VPS17         | YOR127W                 | RGA1          |
| YGR270W                                          | YTA7          | YEL013W                 | VAC8          |
| YNR072W                                          | HXT17         | YJL095W                 | BCK1          |
| YGR188C                                          | BUB1          | YGL252C                 | RTG2          |
| YDR108W                                          | GSG1          | YGR020C                 | VMA7          |
| YLR058C                                          | SHM2          | YJL058C                 | BIT61         |
| YDR335W                                          | MSN5          | YOL081W                 | IRA2          |
| YPR154W                                          | PIN3          | YPL249C                 | GYP5          |
| YOR327C                                          | SNC2          | YLR425W                 | TUS1          |
| YOR066W                                          | MSA1          | YPL137C                 | GIP3          |
| YIL034C                                          | CAP2          | YER114C                 | BOI2          |
| YLR079W                                          | SIC1          | YJR035W                 | RAD26         |
| YIL076W                                          | SEC28         | YIR005W                 | IST3          |
| YIL053W                                          | RHR2          | YOR066W                 | MSA1          |
| YGR261C                                          | APL6          | YPL037C                 | EGD1          |
| YJR140C                                          | HIR3          | YCR086W                 | CSM1          |
| YML115C                                          | VAN1          | YGL212W                 | VAM7          |
| YEL009C                                          | GCN4          | YHL025W                 | SNF6          |
| YLR360W                                          | VPS38         | YGR270W                 | YTA7          |
| YNL243W                                          | SLA2          | YPL240C                 | HSP82         |
| YGR261C                                          | APL6          | YOR132W                 | VPS17         |
| YGR270W                                          | YTA7          | YIL008W                 | URM1          |

| Predictions at threshold level 0.75 continued... |               |                         |               |
|--------------------------------------------------|---------------|-------------------------|---------------|
| Gene1 of predicted pair                          |               | Gene2 of predicted pair |               |
| Systematic Name                                  | Standard Name | Systematic Name         | Standard Name |
| YGL249W                                          | ZIP2          | YPR119W                 | CLB2          |
| YLR410W                                          | VIP1          | YNL225C                 | CNM67         |
| YLR170C                                          | APS1          | YDL192W                 | ARF1          |
| YOR039W                                          | CKB2          | YMR055C                 | BUB2          |
| YOR001W                                          | RRP6          | YDR363W-A               | SEM1          |
| YHR178W                                          | STB5          | YPL161C                 | BEM4          |
| YDL002C                                          | NHP10         | YDR363W-A               | SEM1          |
| YKL214C                                          | YRA2          | YML062C                 | MFT1          |
| YOR270C                                          | VPH1          | YDL185W                 | TFP1          |
| YFL023W                                          | BUD27         | YLR093C                 | NYV1          |
| YMR311C                                          | GLC8          | YAR014C                 | BUD14         |
| YGR019W                                          | UGA1          | YNL288W                 | CAF40         |
| YNL325C                                          | FIG4          | YJR032W                 | CPR7          |
| YBL102W                                          | SFT2          | YFL033C                 | RIM15         |
| YKR035W-A                                        | DID2          | YML071C                 | COG8          |
| YHR016C                                          | YSC84         | YHR114W                 | BZZ1          |
| YNL106C                                          | INP52         | YLR399C                 | BDF1          |
| YLR360W                                          | VPS38         | YDR146C                 | SWI5          |
| YIL159W                                          | BNR1          | YMR032W                 | HOF1          |
| YNL032W                                          | SIW14         | YJR084W                 | CSN12         |
| YCL029C                                          | BIK1          | YIL033C                 | BCY1          |
| YDL035C                                          | GPR1          | YGL121C                 | GPG1          |
| YGL115W                                          | SNF4          | YNL076W                 | MKS1          |
| YDL006W                                          | PTC1          | YLR309C                 | IMH1          |
| YJL004C                                          | SYS1          | YOL018C                 | TLG2          |
| YEL065W                                          | SIT1          | YER144C                 | UBP5          |
| YPR018W                                          | RLF2          | YMR231W                 | PEP5          |
| YNL307C                                          | MCK1          | YJR035W                 | RAD26         |
| YPR084W                                          | YPR084W       | YGR072W                 | UPF3          |

| Predictions at threshold level 0.75 continued... |               |                         |               |
|--------------------------------------------------|---------------|-------------------------|---------------|
| Gene1 of predicted pair                          |               | Gene2 of predicted pair |               |
| Systematic Name                                  | Standard Name | Systematic Name         | Standard Name |
| YPR036W                                          | VMA13         | YHR060W                 | VMA22         |
| YMR284W                                          | YKU70         | YBL079W                 | NUP170        |
| YMR026C                                          | PEX12         | YML071C                 | COG8          |
| YOL054W                                          | PSH1          | YGR188C                 | BUB1          |
| YPL057C                                          | SUR1          | YHR060W                 | VMA22         |
| YML016C                                          | PPZ1          | YDR155C                 | CPR1          |
| YDR076W                                          | RAD55         | YMR038C                 | CCS1          |
| YNL025C                                          | SSN8          | YBR215W                 | HPC2          |
| YBR108W                                          | YBR108W       | YOR043W                 | WHI2          |
| YOR141C                                          | ARP8          | YNL059C                 | ARP5          |
| YMR164C                                          | MSS11         | YFL047W                 | RGD2          |
| YDR443C                                          | SSN2          | YEL036C                 | ANP1          |
| YJR040W                                          | GEF1          | YNL107W                 | YAF9          |
| YDR320C                                          | SWA2          | YPL105C                 | YPL105C       |
| YPL096C-A                                        | ERI1          | YPL240C                 | HSP82         |
| YKL048C                                          | ELM1          | YLR182W                 | SWI6          |
| YKR020W                                          | VPS51         | YOR327C                 | SNC2          |
| YDR310C                                          | SUM1          | YLR180W                 | SAM1          |
| YPL246C                                          | RBD2          | YHR114W                 | BZZ1          |
| YDR378C                                          | LSM6          | YLR254C                 | NDL1          |
| YIL148W                                          | RPL40A        | YKL117W                 | SBA1          |
| YGL200C                                          | EMP24         | YHL002W                 | HSE1          |
| YJL053W                                          | PEP8          | YEL053C                 | MAK10         |
| YHR178W                                          | STB5          | YHR200W                 | RPN10         |
| YKR048C                                          | NAP1          | YJL095W                 | BCK1          |
| YLR381W                                          | CTF3          | YDL047W                 | SIT4          |
| YHR205W                                          | SCH9          | YJR075W                 | HOC1          |
| YGL033W                                          | HOP2          | YMR214W                 | SCJ1          |
| YKR099W                                          | BAS1          | YBR171W                 | SEC66         |

| Predictions at threshold level 0.75 continued... |               |                         |               |
|--------------------------------------------------|---------------|-------------------------|---------------|
| Gene1 of predicted pair                          |               | Gene2 of predicted pair |               |
| Systematic Name                                  | Standard Name | Systematic Name         | Standard Name |
| YGR135W                                          | PRE9          | YJL140W                 | RPB4          |
| YNL329C                                          | PEX6          | YOR312C                 | RPL20B        |
| YGL078C                                          | DBP3          | YNL041C                 | COG6          |
| YGR270W                                          | YTA7          | YPL161C                 | BEM4          |
| YDL223C                                          | HBT1          | YPL037C                 | EGD1          |
| YDL083C                                          | RPS16B        | YDL192W                 | ARF1          |
| YPR051W                                          | MAK3          | YOL018C                 | TLG2          |
| YMR198W                                          | CIK1          | YLR381W                 | CTF3          |
| YKL116C                                          | PRR1          | YDR137W                 | RGP1          |
| YLR018C                                          | POM34         | YGR105W                 | VMA21         |
| YGR056W                                          | RSC1          | YHR056C                 | RSC30         |
| YBL019W                                          | APN2          | YAL015C                 | NTG1          |
| YDR155C                                          | CPR1          | YGL253W                 | HXK2          |
| YNL291C                                          | MID1          | YMR216C                 | SKY1          |
| YNL087W                                          | TCB2          | YDR310C                 | SUM1          |
| YNL139C                                          | RLR1          | YMR273C                 | ZDS1          |
| YHR178W                                          | STB5          | YHR039C-A               | VMA10         |
| YBR108W                                          | YBR108W       | YLR371W                 | ROM2          |
| YBL103C                                          | RTG3          | YNL041C                 | COG6          |
| YOR033C                                          | EXO1          | YLR410W                 | VIP1          |
| YGL174W                                          | BUD13         | YER122C                 | GLO3          |
| YNL106C                                          | INP52         | YPR046W                 | MCM16         |
| YNL243W                                          | SLA2          | YOR332W                 | VMA4          |
| YBR171W                                          | SEC66         | YOL121C                 | RPS19A        |
| YMR198W                                          | CIK1          | YER122C                 | GLO3          |
| YNL307C                                          | MCK1          | YEL060C                 | PRB1          |
| YER120W                                          | SCS2          | YOR327C                 | SNC2          |
| YNR072W                                          | HXT17         | YBL025W                 | RRN10         |
| YIL053W                                          | RHR2          | YDL192W                 | ARF1          |

| Predictions at threshold level 0.75 continued... |               |                         |               |
|--------------------------------------------------|---------------|-------------------------|---------------|
| Gene1 of predicted pair                          |               | Gene2 of predicted pair |               |
| Systematic Name                                  | Standard Name | Systematic Name         | Standard Name |
| YBR200W                                          | BEM1          | YJL006C                 | CTK2          |
| YMR016C                                          | SOK2          | YER162C                 | RAD4          |
| YPL234C                                          | TFP3          | YOL018C                 | TLG2          |
| YBR126C                                          | TPS1          | YEL060C                 | PRB1          |
| YBL008W                                          | HIR1          | YJL127C                 | SPT10         |
| YMR142C                                          | RPL13B        | YNL325C                 | FIG4          |
| YPR051W                                          | MAK3          | YPL195W                 | APL5          |
| YBR280C                                          | SAF1          | YER040W                 | GLN3          |
| YML102W                                          | CAC2          | YMR231W                 | PEP5          |
| YDR484W                                          | VPS52         | YPL045W                 | VPS16         |
| YLL039C                                          | UBI4          | YJL157C                 | FAR1          |
| YAL024C                                          | LTE1          | YNL248C                 | RPA49         |
| YMR153W                                          | NUP53         | YFL023W                 | BUD27         |
| YBR274W                                          | CHK1          | YGL019W                 | CKB1          |
| YBL058W                                          | SHP1          | YGL078C                 | DBP3          |
| YGR261C                                          | APL6          | YDR202C                 | RAV2          |
| YML095C                                          | RAD10         | YBR171W                 | SEC66         |
| YDR443C                                          | SSN2          | YLR425W                 | TUS1          |
| YPL253C                                          | VIK1          | YOR358W                 | HAP5          |
| YHR060W                                          | VMA22         | YMR311C                 | GLC8          |
| YLR095C                                          | IOC2          | YNL087W                 | TCB2          |
| YKL025C                                          | PAN3          | YMR172W                 | HOT1          |
| YGL054C                                          | ERV14         | YAL007C                 | ERP2          |
| YGL147C                                          | RPL9A         | YHR200W                 | RPN10         |
| YBR195C                                          | MSI1          | YBR036C                 | CSG2          |
| YNL201C                                          | PSY2          | YGL163C                 | RAD54         |
| YNL218W                                          | MGS1          | YNL016W                 | PUB1          |
| YHR200W                                          | RPN10         | YJL183W                 | MNN11         |
| YHR200W                                          | RPN10         | YPR030W                 | CSR2          |

| Predictions at threshold level 0.75 continued... |               |                         |               |
|--------------------------------------------------|---------------|-------------------------|---------------|
| Gene1 of predicted pair                          |               | Gene2 of predicted pair |               |
| Systematic Name                                  | Standard Name | Systematic Name         | Standard Name |
| YKL139W                                          | CTK1          | YJL095W                 | BCK1          |
| YGR072W                                          | UPF3          | YOL018C                 | TLG2          |
| YMR109W                                          | MYO5          | YGR188C                 | BUB1          |
| YIL036W                                          | CST6          | YPR046W                 | MCM16         |
| YHL031C                                          | GOS1          | YPR032W                 | SRO7          |
| YDR245W                                          | MNN10         | YER122C                 | GLO3          |
| YDR358W                                          | GGA1          | YLR180W                 | SAM1          |
| YHR178W                                          | STB5          | YGL161C                 | YIP5          |
| YGL163C                                          | RAD54         | YJR090C                 | GRR1          |
| YGL060W                                          | YBP2          | YDR171W                 | HSP42         |
| YML016C                                          | PPZ1          | YEL056W                 | HAT2          |
| YBR127C                                          | VMA2          | YLR447C                 | VMA6          |
| YNL106C                                          | INP52         | YKL110C                 | KTI12         |
| YNL307C                                          | MCK1          | YLR410W                 | VIP1          |
| YLR381W                                          | CTF3          | YBR171W                 | SEC66         |
| YBR215W                                          | HPC2          | YPR120C                 | CLB5          |
| YPL178W                                          | CBC2          | YML057W                 | CMP2          |
| YGL060W                                          | YBP2          | YPL042C                 | SSN3          |
| YCL010C                                          | SGF29         | YGL252C                 | RTG2          |
| YLR386W                                          | VAC14         | YDR318W                 | MCM21         |
| YBL025W                                          | RRN10         | YBR036C                 | CSG2          |
| YER001W                                          | MNN1          | YDL223C                 | HBT1          |
| YLR315W                                          | NKP2          | YOR308C                 | SNU66         |
| YNL068C                                          | FKH2          | YNL116W                 | DMA2          |
| YOR047C                                          | STD1          | YGL252C                 | RTG2          |
| YAL024C                                          | LTE1          | YCR065W                 | HCM1          |
| YBR194W                                          | SOY1          | YDR200C                 | VPS64         |
| YBR030W                                          | YBR030W       | YKL126W                 | YPK1          |
| YLR452C                                          | SST2          | YMR230W                 | RPS10B        |

| Predictions at threshold level 0.75 continued... |               |                         |               |
|--------------------------------------------------|---------------|-------------------------|---------------|
| Gene1 of predicted pair                          |               | Gene2 of predicted pair |               |
| Systematic Name                                  | Standard Name | Systematic Name         | Standard Name |
| YGR072W                                          | UPF3          | YHR134W                 | WSS1          |
| YLR337C                                          | VRP1          | YGR054W                 | YGR054W       |
| YDR254W                                          | CHL4          | YGL250W                 | RMR1          |
| YNL016W                                          | PUB1          | YBL079W                 | NUP170        |
| YKR014C                                          | YPT52         | YOR327C                 | SNC2          |
| YMR095C                                          | SNO1          | YJL095W                 | BCK1          |
| YOR109W                                          | INP53         | YMR054W                 | STV1          |
| YOR035C                                          | SHE4          | YNL076W                 | MKS1          |
| YGL060W                                          | YBP2          | YJL060W                 | BNA3          |
| YOR127W                                          | RGA1          | YDR254W                 | CHL4          |
| YNL307C                                          | MCK1          | YOR368W                 | RAD17         |
| YBR107C                                          | IML3          | YLR447C                 | VMA6          |
| YNL054W                                          | VAC7          | YDR289C                 | RTT103        |
| YMR231W                                          | PEP5          | YPL195W                 | APL5          |
| YPL161C                                          | BEM4          | YJL190C                 | RPS22A        |
| YNL215W                                          | IES2          | YOR141C                 | ARP8          |
| YBL008W                                          | HIR1          | YOR290C                 | SNF2          |
| YDR378C                                          | LSM6          | YKL041W                 | VPS24         |
| YFR031C-A                                        | RPL2A         | YLR093C                 | NYV1          |
| YGR252W                                          | GCN5          | YPL158C                 | YPL158C       |
| YBL008W                                          | HIR1          | YDR310C                 | SUM1          |
| YMR153W                                          | NUP53         | YMR273C                 | ZDS1          |
| YDR293C                                          | SSD1          | YBL021C                 | HAP3          |
| YCR020C-A                                        | MAK31         | YNL041C                 | COG6          |
| YHL031C                                          | GOS1          | YLR093C                 | NYV1          |
| YNL291C                                          | MID1          | YBR107C                 | IML3          |
| YHR081W                                          | LRP1          | YLR398C                 | SKI2          |
| YDL116W                                          | NUP84         | YOL081W                 | IRA2          |
| YNL236W                                          | SIN4          | YLR410W                 | VIP1          |



| Predictions at threshold level 0.75 continued... |               |                         |               |
|--------------------------------------------------|---------------|-------------------------|---------------|
| Gene1 of predicted pair                          |               | Gene2 of predicted pair |               |
| Systematic Name                                  | Standard Name | Systematic Name         | Standard Name |
| YPL037C                                          | EGD1          | YPR030W                 | CSR2          |
| YOR270C                                          | VPH1          | YOR327C                 | SNC2          |
| YDR477W                                          | SNF1          | YOR008C                 | SLG1          |
| YBR194W                                          | SOY1          | YJL006C                 | CTK2          |
| YJL006C                                          | CTK2          | YOL054W                 | PSH1          |
| YBL058W                                          | SHP1          | YDL223C                 | HBT1          |
| YJL136C                                          | RPS21B        | YKL032C                 | IXR1          |
| YJR135C                                          | MCM22         | YDR076W                 | RAD55         |
| YER162C                                          | RAD4          | YBR280C                 | SAF1          |
| YDL116W                                          | NUP84         | YBR017C                 | KAP104        |
| YML115C                                          | VAN1          | YEL044W                 | IES6          |
| YPL161C                                          | BEM4          | YMR214W                 | SCJ1          |
| YPR120C                                          | CLB5          | YDR071C                 | PAA1          |
| YKL139W                                          | CTK1          | YPL018W                 | CTF19         |
| YBL016W                                          | FUS3          | YBR083W                 | TEC1          |
| YER116C                                          | SLX8          | YOL081W                 | IRA2          |
| YDL077C                                          | VAM6          | YNL107W                 | YAF9          |
| YBL067C                                          | UBP13         | YMR089C                 | YTA12         |
| YPR046W                                          | MCM16         | YAR014C                 | BUD14         |
| YKL139W                                          | CTK1          | YHR115C                 | DMA1          |
| YPR089W                                          | YPR089W       | YHR012W                 | VPS29         |
| YDL077C                                          | VAM6          | YAR014C                 | BUD14         |
| YHR039C-A                                        | VMA10         | YDR289C                 | RTT103        |
| YGR104C                                          | SRB5          | YOR308C                 | SNU66         |
| YOR001W                                          | RRP6          | YPL057C                 | SUR1          |
| YIL034C                                          | CAP2          | YPL256C                 | CLN2          |
| YBR200W                                          | BEM1          | YOR043W                 | WHI2          |
| YFR008W                                          | FAR7          | YNL127W                 | FAR11         |
| YCL037C                                          | SRO9          | YKR001C                 | VPS1          |

| Predictions at threshold level 0.75 continued... |               |                         |               |
|--------------------------------------------------|---------------|-------------------------|---------------|
| Gene1 of predicted pair                          |               | Gene2 of predicted pair |               |
| Systematic Name                                  | Standard Name | Systematic Name         | Standard Name |
| YPR036W                                          | VMA13         | YDL013W                 | SLX5          |
| YDR484W                                          | VPS52         | YNL076W                 | MKS1          |
| YNL087W                                          | TCB2          | YLR371W                 | ROM2          |
| YPL024W                                          | RMI1          | YNL297C                 | MON2          |
| YPL161C                                          | BEM4          | YLR398C                 | SKI2          |
| YDL223C                                          | HBT1          | YDR310C                 | SUM1          |
| YDR144C                                          | MKC7          | YPL018W                 | CTF19         |
| YGL094C                                          | PAN2          | YLR085C                 | ARP6          |
| YDL185W                                          | TFP1          | YPL018W                 | CTF19         |
| YLR216C                                          | CPR6          | YPR046W                 | MCM16         |
| YIL148W                                          | RPL40A        | YBL079W                 | NUP170        |
| YGL200C                                          | EMP24         | YJL183W                 | MNN11         |
| YPL259C                                          | APM1          | YOR036W                 | PEP12         |
| YOR112W                                          | CEX1          | YGR020C                 | VMA7          |
| YPL161C                                          | BEM4          | YGL124C                 | MON1          |
| YBR107C                                          | IML3          | YEL056W                 | HAT2          |
| YGL087C                                          | MMS2          | YBR200W                 | BEM1          |
| YMR039C                                          | SUB1          | YLR288C                 | MEC3          |
| YPL115C                                          | BEM3          | YNL166C                 | BNI5          |
| YOL030W                                          | GAS5          | YLR313C                 | SPH1          |
| YOR275C                                          | RIM20         | YOL081W                 | IRA2          |
| YIL076W                                          | SEC28         | YMR153W                 | NUP53         |
| YKR061W                                          | KTR2          | YDR318W                 | MCM21         |
| YKL213C                                          | DOA1          | YER139C                 | YER139C       |
| YGL223C                                          | COG1          | YCL037C                 | SRO9          |
| YBR020W                                          | GAL1          | YDR363W-A               | SEM1          |
| YLL026W                                          | HSP104        | YJR032W                 | CPR7          |
| YJL124C                                          | LSM1          | YKL110C                 | KTI12         |
| YMR172W                                          | HOT1          | YHL002W                 | HSE1          |

| Predictions at threshold level 0.75 continued... |               |                         |               |
|--------------------------------------------------|---------------|-------------------------|---------------|
| Gene1 of predicted pair                          |               | Gene2 of predicted pair |               |
| Systematic Name                                  | Standard Name | Systematic Name         | Standard Name |
| YMR055C                                          | BUB2          | YDR318W                 | MCM21         |
| YLR079W                                          | SIC1          | YBR200W                 | BEM1          |
| YNL025C                                          | SSN8          | YFR010W                 | UBP6          |
| YHR200W                                          | RPN10         | YFR036W                 | CDC26         |
| YNL032W                                          | SIW14         | YLR093C                 | NYV1          |
| YBR171W                                          | SEC66         | YMR311C                 | GLC8          |
| YER144C                                          | UBP5          | YPL057C                 | SUR1          |
| YLR337C                                          | VRP1          | YBL067C                 | UBP13         |
| YDL226C                                          | GCS1          | YNL107W                 | YAF9          |
| YCR077C                                          | PAT1          | YDR310C                 | SUM1          |
| YKR020W                                          | VPS51         | YKR048C                 | NAP1          |
| YKL139W                                          | CTK1          | YOR290C                 | SNF2          |
| YOL145C                                          | CTR9          | YPL161C                 | BEM4          |
| YOL018C                                          | TLG2          | YNL127W                 | FAR11         |
| YBR215W                                          | HPC2          | YHR010W                 | RPL27A        |
| YDR137W                                          | RGP1          | YLR093C                 | NYV1          |
| YNR052C                                          | POP2          | YIL103W                 | DPH1          |
| YGL087C                                          | MMS2          | YBR171W                 | SEC66         |
| YDR477W                                          | SNF1          | YMR140W                 | SIP5          |
| YPR017C                                          | DSS4          | YGL115W                 | SNF4          |
| YHR134W                                          | WSS1          | YLR381W                 | CTF3          |
| YBR173C                                          | UMP1          | YLR094C                 | GIS3          |
| YMR116C                                          | ASC1          | YJL183W                 | MNN11         |
| YOR332W                                          | VMA4          | YDR202C                 | RAV2          |
| YDR448W                                          | ADA2          | YGL252C                 | RTG2          |
| YCR081W                                          | SRB8          | YOR140W                 | SFL1          |
| YGL158W                                          | RCK1          | YPL058C                 | PDR12         |
| YOR043W                                          | WHI2          | YGL003C                 | CDH1          |
| YDR358W                                          | GGA1          | YLR128W                 | DCN1          |

| Predictions at threshold level 0.75 continued... |               |                         |               |
|--------------------------------------------------|---------------|-------------------------|---------------|
| Gene1 of predicted pair                          |               | Gene2 of predicted pair |               |
| Systematic Name                                  | Standard Name | Systematic Name         | Standard Name |
| YDL013W                                          | SLX5          | YKL101W                 | HSL1          |
| YOR327C                                          | SNC2          | YBR036C                 | CSG2          |
| YHL027W                                          | RIM101        | YJL183W                 | MNN11         |
| YLR452C                                          | SST2          | YNL107W                 | YAF9          |
| YDL116W                                          | NUP84         | YDR207C                 | UME6          |
| YDR477W                                          | SNF1          | YOR270C                 | VPH1          |
| YGL147C                                          | RPL9A         | YBR200W                 | BEM1          |
| YGL066W                                          | SGF73         | YLR150W                 | STM1          |
| YNL264C                                          | PDR17         | YOR101W                 | RAS1          |
| YMR153W                                          | NUP53         | YDR261C                 | EXG2          |
| YKL139W                                          | CTK1          | YNL238W                 | KEX2          |
| YPR046W                                          | MCM16         | YNL116W                 | DMA2          |
| YOR270C                                          | VPH1          | YPL195W                 | APL5          |
| YML071C                                          | COG8          | YGL124C                 | MON1          |
| YML001W                                          | YPT7          | YAR014C                 | BUD14         |
| YFR010W                                          | UBP6          | YNL291C                 | MID1          |
| YGR003W                                          | CUL3          | YPR066W                 | UBA3          |
| YMR216C                                          | SKY1          | YKR020W                 | VPS51         |
| YDR207C                                          | UME6          | YOL081W                 | IRA2          |
| YML103C                                          | NUP188        | YGR081C                 | SLX9          |
| YDR383C                                          | NKP1          | YFR036W                 | CDC26         |
| YMR152W                                          | YIM1          | YER122C                 | GLO3          |
| YFR036W                                          | CDC26         | YMR214W                 | SCJ1          |
| YDL155W                                          | CLB3          | YOL091W                 | SPO21         |
| YML112W                                          | CTK3          | YPR119W                 | CLB2          |
| YBR215W                                          | HPC2          | YCR031C                 | RPS14A        |
| YBR200W                                          | BEM1          | YER122C                 | GLO3          |
| YMR224C                                          | MRE11         | YNL079C                 | TPM1          |
| YFL023W                                          | BUD27         | YOR066W                 | MSA1          |

| Predictions at threshold level 0.75 continued... |               |                         |               |
|--------------------------------------------------|---------------|-------------------------|---------------|
| Gene1 of predicted pair                          |               | Gene2 of predicted pair |               |
| Systematic Name                                  | Standard Name | Systematic Name         | Standard Name |
| YBR200W                                          | BEM1          | YDL056W                 | MBP1          |
| YGL066W                                          | SGF73         | YJL095W                 | BCK1          |
| YLR386W                                          | VAC14         | YJL006C                 | CTK2          |
| YOR080W                                          | DIA2          | YBR107C                 | IML3          |
| YLR384C                                          | IKI3          | YBL071W-A               | KTI11         |
| YAL024C                                          | LTE1          | YMR038C                 | CCS1          |
| YIL156W                                          | UBP7          | YFL047W                 | RGD2          |
| YKR048C                                          | NAP1          | YIL133C                 | RPL16A        |
| YOR069W                                          | VPS5          | YMR054W                 | STV1          |
| YDL192W                                          | ARF1          | YOL081W                 | IRA2          |
| YML095C                                          | RAD10         | YLR370C                 | ARC18         |
| YDR318W                                          | MCM21         | YGL151W                 | NUT1          |
| YBL072C                                          | RPS8A         | YLR370C                 | ARC18         |
| YJL036W                                          | SNX4          | YAL002W                 | VPS8          |
| YOR140W                                          | SFL1          | YGL025C                 | PGD1          |
| YER161C                                          | SPT2          | YLR350W                 | ORM2          |
| YJL172W                                          | CPS1          | YBL103C                 | RTG3          |
| YNL031C                                          | HHT2          | YER068W                 | MOT2          |
| YOR109W                                          | INP53         | YDL192W                 | ARF1          |
| YBR200W                                          | BEM1          | YDR144C                 | MKC7          |
| YGR241C                                          | YAP1802       | YJL029C                 | VPS53         |
| YGR020C                                          | VMA7          | YER120W                 | SCS2          |
| YKR061W                                          | KTR2          | YLR315W                 | NKP2          |
| YMR224C                                          | MRE11         | YKR099W                 | BAS1          |
| YOR371C                                          | GPB1          | YGL121C                 | GPG1          |
| YLR079W                                          | SIC1          | YOL091W                 | SPO21         |
| YBL051C                                          | PIN4          | YNL166C                 | BNI5          |
| YDR296W                                          | MHR1          | YPL248C                 | GAL4          |
| YNL218W                                          | MGS1          | YPL022W                 | RAD1          |

| Predictions at threshold level 0.75 continued... |               |                         |               |
|--------------------------------------------------|---------------|-------------------------|---------------|
| Gene1 of predicted pair                          |               | Gene2 of predicted pair |               |
| Systematic Name                                  | Standard Name | Systematic Name         | Standard Name |
| YNL069C                                          | RPL16B        | YOR127W                 | RGA1          |
| YML103C                                          | NUP188        | YPL152W                 | RRD2          |
| YGL212W                                          | VAM7          | YPL050C                 | MNN9          |
| YMR125W                                          | STO1          | YPL246C                 | RBD2          |
| YGR020C                                          | VMA7          | YCL037C                 | SRO9          |
| YLR399C                                          | BDF1          | YJR060W                 | CBF1          |
| YLR058C                                          | SHM2          | YJR135C                 | MCM22         |
| YML095C                                          | RAD10         | YMR109W                 | MYO5          |
| YLR083C                                          | EMP70         | YJL154C                 | VPS35         |
| YOL111C                                          | MDY2          | YOL121C                 | RPS19A        |
| YCR081W                                          | SRB8          | YDR245W                 | MNN10         |
| YBR228W                                          | SLX1          | YJR035W                 | RAD26         |
| YLR119W                                          | SRN2          | YDR484W                 | VPS52         |
| YNL288W                                          | CAF40         | YKL048C                 | ELM1          |
| YOR132W                                          | VPS17         | YEL042W                 | GDA1          |
| YKL139W                                          | CTK1          | YOR043W                 | WHI2          |
| YNL307C                                          | MCK1          | YDR207C                 | UME6          |
| YFR036W                                          | CDC26         | YER139C                 | YER139C       |
| YHR156C                                          | LIN1          | YPL137C                 | GIP3          |
| YCR088W                                          | ABP1          | YOR367W                 | SCP1          |
| YAL024C                                          | LTE1          | YIR005W                 | IST3          |
| YCL001W                                          | RER1          | YJR033C                 | RAV1          |
| YLR320W                                          | MMS22         | YMR133W                 | REC114        |
| YER162C                                          | RAD4          | YKR030W                 | GMH1          |
| YGL135W                                          | RPL1B         | YGL215W                 | CLG1          |
| YPL022W                                          | RAD1          | YJR052W                 | RAD7          |
| YKR057W                                          | RPS21A        | YPL161C                 | BEM4          |
| YNL016W                                          | PUB1          | YGL031C                 | RPL24A        |
| YNL201C                                          | PSY2          | YFR030W                 | MET10         |

| Predictions at threshold level 0.75 continued... |               |                         |               |
|--------------------------------------------------|---------------|-------------------------|---------------|
| Gene1 of predicted pair                          |               | Gene2 of predicted pair |               |
| Systematic Name                                  | Standard Name | Systematic Name         | Standard Name |
| YML001W                                          | YPT7          | YNL238W                 | KEX2          |
| YML095C                                          | RAD10         | YDL155W                 | CLB3          |
| YOR076C                                          | SKI7          | YNL106C                 | INP52         |
| YHR200W                                          | RPN10         | YAL002W                 | VPS8          |
| YLR386W                                          | VAC14         | YCR053W                 | THR4          |
| YMR142C                                          | RPL13B        | YER122C                 | GLO3          |
| YHR160C                                          | PEX18         | YGL153W                 | PEX14         |
| YGL115W                                          | SNF4          | YLR370C                 | ARC18         |
| YNR052C                                          | POP2          | YAR014C                 | BUD14         |
| YDR477W                                          | SNF1          | YLR441C                 | RPS1A         |
| YHR060W                                          | VMA22         | YML038C                 | YMD8          |
| YDR443C                                          | SSN2          | YJL172W                 | CPS1          |
| YPR017C                                          | DSS4          | YJL053W                 | PEP8          |
| YGL212W                                          | VAM7          | YNL041C                 | COG6          |
| YFR031C-A                                        | RPL2A         | YDL223C                 | HBT1          |
| YLR452C                                          | SST2          | YNL147W                 | LSM7          |
| YAL051W                                          | OAF1          | YJL124C                 | LSM1          |
| YDR484W                                          | VPS52         | YPL137C                 | GIP3          |
| YCL001W                                          | RER1          | YEL043W                 | YEL043W       |
| YHR178W                                          | STB5          | YAR014C                 | BUD14         |
| YNL288W                                          | CAF40         | YGL151W                 | NUT1          |
| YEL009C                                          | GCN4          | YPL129W                 | TAF14         |
| YKL116C                                          | PRR1          | YLR180W                 | SAM1          |
| YDL160C                                          | DHH1          | YBR089C-A               | NHP6B         |
| YBR131W                                          | CCZ1          | YBR082C                 | UBC4          |
| YJL154C                                          | VPS35         | YGR105W                 | VMA21         |
| YPL037C                                          | EGD1          | YPL234C                 | TFP3          |
| YOR109W                                          | INP53         | YNL107W                 | YAF9          |
| YOR337W                                          | TEA1          | YLR320W                 | MMS22         |

| Predictions at threshold level 0.75 continued... |               |                         |               |
|--------------------------------------------------|---------------|-------------------------|---------------|
| Gene1 of predicted pair                          |               | Gene2 of predicted pair |               |
| Systematic Name                                  | Standard Name | Systematic Name         | Standard Name |
| YPL246C                                          | RBD2          | YPL256C                 | CLN2          |
| YML115C                                          | VAN1          | YBR181C                 | RPS6B         |
| YDR253C                                          | MET32         | YPL022W                 | RAD1          |
| YLR435W                                          | TSR2          | YDR310C                 | SUM1          |
| YDR129C                                          | SAC6          | YGL095C                 | VPS45         |
| YML071C                                          | COG8          | YNL076W                 | MKS1          |
| YLR441C                                          | RPS1A         | YPR030W                 | CSR2          |
| YER109C                                          | FLO8          | YBR083W                 | TEC1          |
| YMR199W                                          | CLN1          | YML057W                 | CMP2          |
| YNL087W                                          | TCB2          | YOR066W                 | MSA1          |
| YOR290C                                          | SNF2          | YPR036W                 | VMA13         |
| YNL215W                                          | IES2          | YLR254C                 | NDL1          |
| YIL034C                                          | CAP2          | YDR309C                 | GIC2          |
| YLR441C                                          | RPS1A         | YHR200W                 | RPN10         |
| YOR290C                                          | SNF2          | YPL195W                 | APL5          |
| YCR020C-A                                        | MAK31         | YGL115W                 | SNF4          |
| YIL076W                                          | SEC28         | YKR035W-A               | DID2          |
| YLR292C                                          | SEC72         | YLR447C                 | VMA6          |
| YBR171W                                          | SEC66         | YLR425W                 | TUS1          |
| YDR174W                                          | HMO1          | YMR224C                 | MRE11         |
| YGR270W                                          | YTA7          | YJR060W                 | CBF1          |
| YGL016W                                          | KAP122        | YKR024C                 | DBP7          |
| YMR026C                                          | PEX12         | YLR452C                 | SST2          |
| YLR234W                                          | TOP3          | YKL068W                 | NUP100        |
| YAL024C                                          | LTE1          | YPR120C                 | CLB5          |
| YCL037C                                          | SRO9          | YGL054C                 | ERV14         |
| YML058W                                          | SML1          | YGL175C                 | SAE2          |
| YDR129C                                          | SAC6          | YJL183W                 | MNN11         |
| YGL153W                                          | PEX14         | YDL155W                 | CLB3          |



| Predictions at threshold level 0.75 continued... |               |                         |               |
|--------------------------------------------------|---------------|-------------------------|---------------|
| Gene1 of predicted pair                          |               | Gene2 of predicted pair |               |
| Systematic Name                                  | Standard Name | Systematic Name         | Standard Name |
| YIL072W                                          | HOP1          | YLR263W                 | RED1          |
| YPL137C                                          | GIP3          | YGL124C                 | MON1          |
| YEL050C                                          | RML2          | YDL155W                 | CLB3          |
| YCR066W                                          | RAD18         | YMR038C                 | CCS1          |
| YBL027W                                          | RPL19B        | YIR009W                 | MSL1          |
| YGR249W                                          | MGA1          | YOL111C                 | MDY2          |
| YKL032C                                          | IXR1          | YMR055C                 | BUB2          |
| YCR020C-A                                        | MAK31         | YEL053C                 | MAK10         |
| YEL051W                                          | VMA8          | YPR032W                 | SRO7          |
| YLR360W                                          | VPS38         | YEL051W                 | VMA8          |
| YJR140C                                          | HIR3          | YGL019W                 | CKB1          |
| YLR386W                                          | VAC14         | YPR120C                 | CLB5          |
| YHR178W                                          | STB5          | YBR036C                 | CSG2          |
| YGR072W                                          | UPF3          | YCR066W                 | RAD18         |
| YPL195W                                          | APL5          | YAL002W                 | VPS8          |
| YNL106C                                          | INP52         | YDR183W                 | PLP1          |
| YDR225W                                          | HTA1          | YPR120C                 | CLB5          |
| YFR030W                                          | MET10         | YCR086W                 | CSM1          |
| YLR079W                                          | SIC1          | YDL059C                 | RAD59         |
| YLR360W                                          | VPS38         | YJR135C                 | MCM22         |
| YPL105C                                          | YPL105C       | YNL041C                 | COG6          |
| YJL095W                                          | BCK1          | YKL119C                 | VPH2          |
| YKR072C                                          | SIS2          | YML102W                 | CAC2          |
| YDR378C                                          | LSM6          | YOR308C                 | SNU66         |
| YMR179W                                          | SPT21         | YNL107W                 | YAF9          |
| YER144C                                          | UBP5          | YNL041C                 | COG6          |
| YDR192C                                          | NUP42         | YMR255W                 | GFD1          |
| YMR216C                                          | SKY1          | YDR310C                 | SUM1          |
| YNL291C                                          | MID1          | YOR368W                 | RAD17         |

| Predictions at threshold level 0.75 continued... |               |                         |               |
|--------------------------------------------------|---------------|-------------------------|---------------|
| Gene1 of predicted pair                          |               | Gene2 of predicted pair |               |
| Systematic Name                                  | Standard Name | Systematic Name         | Standard Name |
| YBR194W                                          | SOY1          | YLR370C                 | ARC18         |
| YPL256C                                          | CLN2          | YKL068W                 | NUP100        |
| YLR386W                                          | VAC14         | YLR410W                 | VIP1          |
| YFL026W                                          | STE2          | YHR108W                 | GGA2          |
| YGL078C                                          | DBP3          | YDL083C                 | RPS16B        |
| YKL116C                                          | PRR1          | YOR066W                 | MSA1          |
| YLR150W                                          | STM1          | YML028W                 | TSA1          |
| YPL161C                                          | BEM4          | YHR081W                 | LRP1          |
| YNL329C                                          | PEX6          | YOL044W                 | PEX15         |
| YOR109W                                          | INP53         | YNL051W                 | COG5          |
| YAL024C                                          | LTE1          | YMR230W                 | RPS10B        |
| YLR288C                                          | MEC3          | YML095C                 | RAD10         |
| YLR018C                                          | POM34         | YIL156W                 | UBP7          |
| YDR507C                                          | GIN4          | YKR048C                 | NAP1          |
| YHR060W                                          | VMA22         | YAR014C                 | BUD14         |
| YOR078W                                          | BUD21         | YHR052W                 | CIC1          |
| YGL087C                                          | MMS2          | YPR046W                 | MCM16         |
| YPL115C                                          | BEM3          | YBR108W                 | YBR108W       |
| YBL016W                                          | FUS3          | YLR452C                 | SST2          |
| YDR318W                                          | MCM21         | YOR308C                 | SNU66         |
| YGR249W                                          | MGA1          | YNL325C                 | FIG4          |
| YLR381W                                          | CTF3          | YDL226C                 | GCS1          |
| YGR188C                                          | BUB1          | YOL081W                 | IRA2          |
| YLR452C                                          | SST2          | YHR158C                 | KEL1          |
| YOR127W                                          | RGA1          | YDR202C                 | RAV2          |
| YGL223C                                          | COG1          | YJL004C                 | SYS1          |
| YOR026W                                          | BUB3          | YIL033C                 | BCY1          |
| YGR059W                                          | SPR3          | YKR024C                 | DBP7          |
| YPL161C                                          | BEM4          | YDR144C                 | MKC7          |

| Predictions at threshold level 0.75 continued... |               |                         |               |
|--------------------------------------------------|---------------|-------------------------|---------------|
| Gene1 of predicted pair                          |               | Gene2 of predicted pair |               |
| Systematic Name                                  | Standard Name | Systematic Name         | Standard Name |
| YGL124C                                          | MON1          | YIL133C                 | RPL16A        |
| YER044C                                          | ERG28         | YNL076W                 | MKS1          |
| YNL201C                                          | PSY2          | YBR107C                 | IML3          |
| YDL223C                                          | HBT1          | YLR398C                 | SKI2          |
| YAL024C                                          | LTE1          | YJR060W                 | CBF1          |
| YBR019C                                          | GAL10         | YJL183W                 | MNN11         |
| YLR381W                                          | CTF3          | YPL152W                 | RRD2          |
| YPR017C                                          | DSS4          | YPR028W                 | YOP1          |
| YER001W                                          | MNN1          | YJL095W                 | BCK1          |
| YLR234W                                          | TOP3          | YDR260C                 | SWM1          |
| YNL206C                                          | RTT106        | YJL136C                 | RPS21B        |
| YLR135W                                          | SLX4          | YNL016W                 | PUB1          |
| YML062C                                          | MFT1          | YBR111W-A               | SUS1          |
| YPL057C                                          | SUR1          | YOL121C                 | RPS19A        |
| YOR076C                                          | SKI7          | YGR072W                 | UPF3          |
| YNL041C                                          | COG6          | YEL042W                 | GDA1          |
| YPL019C                                          | VTC3          | YFL004W                 | VTC2          |
| YNL325C                                          | FIG4          | YLR093C                 | NYV1          |
| YBL058W                                          | SHP1          | YPR036W                 | VMA13         |
| YGL033W                                          | HOP2          | YGL115W                 | SNF4          |
| YLR447C                                          | VMA6          | YGL253W                 | HXK2          |
| YNL206C                                          | RTT106        | YER110C                 | KAP123        |
| YKL074C                                          | MUD2          | YNL091W                 | NST1          |
| YNR072W                                          | HXT17         | YKR035W-A               | DID2          |
| YGR249W                                          | MGA1          | YJR032W                 | CPR7          |
| YFL023W                                          | BUD27         | YPL161C                 | BEM4          |
| YOR001W                                          | RRP6          | YNL297C                 | MON2          |
| YGR188C                                          | BUB1          | YOR014W                 | RTS1          |
| YOR290C                                          | SNF2          | YER139C                 | YER139C       |

| Predictions at threshold level 0.75 continued... |               |                         |               |
|--------------------------------------------------|---------------|-------------------------|---------------|
| Gene1 of predicted pair                          |               | Gene2 of predicted pair |               |
| Systematic Name                                  | Standard Name | Systematic Name         | Standard Name |
| YLR192C                                          | HCR1          | YOR035C                 | SHE4          |
| YMR095C                                          | SNO1          | YPL195W                 | APL5          |
| YER044C                                          | ERG28         | YER162C                 | RAD4          |
| YDR484W                                          | VPS52         | YOR035C                 | SHE4          |
| YBR010W                                          | HHT1          | YLR182W                 | SWI6          |
| YBR194W                                          | SOY1          | YER139C                 | YER139C       |
| YMR142C                                          | RPL13B        | YMR153W                 | NUP53         |
| YFR010W                                          | UBP6          | YKL213C                 | DOA1          |
| YCR034W                                          | FEN1          | YOL081W                 | IRA2          |
| YMR202W                                          | ERG2          | YLR370C                 | ARC18         |
| YHL031C                                          | GOS1          | YDR289C                 | RTT103        |
| YDR080W                                          | VPS41         | YGR020C                 | VMA7          |
| YMR039C                                          | SUB1          | YGL148W                 | ARO2          |
| YGR135W                                          | PRE9          | YJR035W                 | RAD26         |
| YBR126C                                          | TPS1          | YOL111C                 | MDY2          |
| YOR106W                                          | VAM3          | YNL041C                 | COG6          |
| YLR018C                                          | POM34         | YKL117W                 | SBA1          |
| YIL053W                                          | RHR2          | YJR084W                 | CSN12         |
| YPL115C                                          | BEM3          | YBR290W                 | BSD2          |
| YGR270W                                          | YTA7          | YDR289C                 | RTT103        |
| YLR315W                                          | NKP2          | YDR318W                 | MCM21         |
| YFR031C-A                                        | RPL2A         | YKR035W-A               | DID2          |
| YBR200W                                          | BEM1          | YPL089C                 | RLM1          |
| YJL106W                                          | IME2          | YPR119W                 | CLB2          |
| YMR133W                                          | REC114        | YHR039C-A               | VMA10         |
| YHR195W                                          | NVJ1          | YEL013W                 | VAC8          |
| YMR127C                                          | SAS2          | YLR399C                 | BDF1          |
| YIL008W                                          | URM1          | YGL019W                 | CKB1          |
| YMR205C                                          | PFK2          | YGR135W                 | PRE9          |

| Predictions at threshold level 0.75 continued... |               |                         |               |
|--------------------------------------------------|---------------|-------------------------|---------------|
| Gene1 of predicted pair                          |               | Gene2 of predicted pair |               |
| Systematic Name                                  | Standard Name | Systematic Name         | Standard Name |
| YMR224C                                          | MRE11         | YNL041C                 | COG6          |
| YEL050C                                          | RML2          | YBR107C                 | IML3          |
| YFR031C-A                                        | RPL2A         | YGR072W                 | UPF3          |
| YGL090W                                          | LIF1          | YCR014C                 | POL4          |
| YBR171W                                          | SEC66         | YMR133W                 | REC114        |
| YDR329C                                          | PEX3          | YHR160C                 | PEX18         |
| YDR496C                                          | PUF6          | YKL009W                 | MRT4          |
| YGL087C                                          | MMS2          | YLR386W                 | VAC14         |
| YER162C                                          | RAD4          | YDR153C                 | ENT5          |
| YDR129C                                          | SAC6          | YLR429W                 | CRN1          |
| YAR014C                                          | BUD14         | YOL081W                 | IRA2          |
| YOR112W                                          | CEX1          | YKR030W                 | GMH1          |
| YBR131W                                          | CCZ1          | YPL045W                 | VPS16         |
| YDL002C                                          | NHP10         | YHR039C-A               | VMA10         |
| YLR083C                                          | EMP70         | YML071C                 | COG8          |
| YPL253C                                          | VIK1          | YLR150W                 | STM1          |
| YER116C                                          | SLX8          | YMR152W                 | YIM1          |
| YDR142C                                          | PEX7          | YOL044W                 | PEX15         |
| YDL154W                                          | MSH5          | YLR234W                 | TOP3          |
| YCR020C-A                                        | MAK31         | YLR309C                 | IMH1          |
| YGR249W                                          | MGA1          | YLR180W                 | SAM1          |
| YLR337C                                          | VRP1          | YGL253W                 | HXK2          |
| YNL087W                                          | TCB2          | YJR032W                 | CPR7          |
| YGL200C                                          | EMP24         | YGR135W                 | PRE9          |
| YLR192C                                          | HCR1          | YOL111C                 | MDY2          |
| YLR058C                                          | SHM2          | YJL006C                 | CTK2          |
| YMR216C                                          | SKY1          | YOR327C                 | SNC2          |
| YOR127W                                          | RGA1          | YHR152W                 | SPO12         |
| YLR381W                                          | CTF3          | YDR378C                 | LSM6          |

| Predictions at threshold level 0.75 continued... |               |                         |               |
|--------------------------------------------------|---------------|-------------------------|---------------|
| Gene1 of predicted pair                          |               | Gene2 of predicted pair |               |
| Systematic Name                                  | Standard Name | Systematic Name         | Standard Name |
| YDR383C                                          | NKP1          | YMR055C                 | BUB2          |
| YPL024W                                          | RMI1          | YHR134W                 | WSS1          |
| YNL291C                                          | MID1          | YER120W                 | SCS2          |
| YBL102W                                          | SFT2          | YJR060W                 | CBF1          |
| YLR386W                                          | VAC14         | YBR036C                 | CSG2          |
| YPL125W                                          | KAP120        | YKL068W                 | NUP100        |
| YJR005W                                          | APL1          | YGL003C                 | CDH1          |
| YPL120W                                          | VPS30         | YAL002W                 | VPS8          |
| YNL032W                                          | SIW14         | YDR207C                 | UME6          |
| YGL043W                                          | DST1          | YGL094C                 | PAN2          |
| YFL023W                                          | BUD27         | YBR171W                 | SEC66         |
| YGL054C                                          | ERV14         | YNL051W                 | COG5          |
| YOR308C                                          | SNU66         | YER139C                 | YER139C       |
| YEL043W                                          | YEL043W       | YER162C                 | RAD4          |
| YOR191W                                          | RIS1          | YCL037C                 | SRO9          |
| YAL024C                                          | LTE1          | YLR441C                 | RPS1A         |
| YOR080W                                          | DIA2          | YKL160W                 | ELF1          |
| YDL083C                                          | RPS16B        | YPR030W                 | CSR2          |
| YGL223C                                          | COG1          | YDL077C                 | VAM6          |
| YKR099W                                          | BAS1          | YNL238W                 | KEX2          |
| YLR386W                                          | VAC14         | YPL018W                 | CTF19         |
| YKL007W                                          | CAP1          | YDR293C                 | SSD1          |
| YOL018C                                          | TLG2          | YLR309C                 | IMH1          |
| YER040W                                          | GLN3          | YLR180W                 | SAM1          |
| YFL013C                                          | IES1          | YDR378C                 | LSM6          |
| YKR001C                                          | VPS1          | YHR060W                 | VMA22         |
| YOR141C                                          | ARP8          | YNL116W                 | DMA2          |
| YBR200W                                          | BEM1          | YGL019W                 | CKB1          |
| YLR234W                                          | TOP3          | YNR052C                 | POP2          |

| Predictions at threshold level 0.75 continued... |               |                         |               |
|--------------------------------------------------|---------------|-------------------------|---------------|
| Gene1 of predicted pair                          |               | Gene2 of predicted pair |               |
| Systematic Name                                  | Standard Name | Systematic Name         | Standard Name |
| YDR137W                                          | RGP1          | YNL076W                 | MKS1          |
| YPR084W                                          | YPR084W       | YHR039C-A               | VMA10         |
| YBR217W                                          | ATG12         | YKL126W                 | YPK1          |
| YKL025C                                          | PAN3          | YLR233C                 | EST1          |
| YML038C                                          | YMD8          | YMR054W                 | STV1          |
| YDR358W                                          | GGA1          | YJL183W                 | MNN11         |
| YPL140C                                          | MKK2          | YIL113W                 | SDP1          |
| YFL033C                                          | RIM15         | YOR327C                 | SNC2          |
| YDR457W                                          | TOM1          | YPR119W                 | CLB2          |
| YKL110C                                          | KTI12         | YPR046W                 | MCM16         |
| YJL036W                                          | SNX4          | YML071C                 | COG8          |
| YFR036W                                          | CDC26         | YJL164C                 | TPK1          |
| YDR108W                                          | GSG1          | YOR069W                 | VPS5          |
| YHR111W                                          | UBA4          | YGL252C                 | RTG2          |
| YCR020C-A                                        | MAK31         | YGL223C                 | COG1          |
| YKL139W                                          | CTK1          | YDR245W                 | MNN10         |
| YFR030W                                          | MET10         | YHR115C                 | DMA1          |
| YLR191W                                          | PEX13         | YNL214W                 | PEX17         |
| YOR076C                                          | SKI7          | YJL176C                 | SWI3          |
| YGR252W                                          | GCN5          | YKR048C                 | NAP1          |
| YPL161C                                          | BEM4          | YGL054C                 | ERV14         |
| YOR270C                                          | VPH1          | YMR133W                 | REC114        |
| YMR273C                                          | ZDS1          | YBR010W                 | HHT1          |
| YCR020C-A                                        | MAK31         | YNL127W                 | FAR11         |
| YAL024C                                          | LTE1          | YDL013W                 | SLX5          |
| YBR217W                                          | ATG12         | YBR200W                 | BEM1          |
| YFL013C                                          | IES1          | YGR270W                 | YTA7          |
| YGR261C                                          | APL6          | YEL053C                 | MAK10         |
| YDL116W                                          | NUP84         | YML102W                 | CAC2          |

| Predictions at threshold level 0.75 continued... |               |                         |               |
|--------------------------------------------------|---------------|-------------------------|---------------|
| Gene1 of predicted pair                          |               | Gene2 of predicted pair |               |
| Systematic Name                                  | Standard Name | Systematic Name         | Standard Name |
| YJL127C                                          | SPT10         | YBR107C                 | IML3          |
| YGL208W                                          | SIP2          | YGL179C                 | TOS3          |
| YEL053C                                          | MAK10         | YMR152W                 | YIM1          |
| YDL020C                                          | RPN4          | YOR332W                 | VMA4          |
| YGR241C                                          | YAP1802       | YDR320C                 | SWA2          |
| YNL199C                                          | GCR2          | YLR315W                 | NKP2          |
| YDR108W                                          | GSG1          | YHR039C-A               | VMA10         |
| YAL024C                                          | LTE1          | YML103C                 | NUP188        |
| YIL076W                                          | SEC28         | YER120W                 | SCS2          |
| YCR053W                                          | THR4          | YER040W                 | GLN3          |
| YJL176C                                          | SWI3          | YML115C                 | VAN1          |
| YGL078C                                          | DBP3          | YLR093C                 | NYV1          |
| YGL115W                                          | SNF4          | YPL137C                 | GIP3          |
| YLR360W                                          | VPS38         | YML097C                 | VPS9          |
| YPL115C                                          | BEM3          | YER110C                 | KAP123        |
| YGL003C                                          | CDH1          | YJL183W                 | MNN11         |
| YDR443C                                          | SSN2          | YDL083C                 | RPS16B        |
| YJR135C                                          | MCM22         | YDR155C                 | CPR1          |
| YHR178W                                          | STB5          | YPL018W                 | CTF19         |
| YIR017C                                          | MET28         | YDR318W                 | MCM21         |
| YDR156W                                          | RPA14         | YPR120C                 | CLB5          |
| YGR019W                                          | UGA1          | YOR358W                 | HAP5          |
| YPL037C                                          | EGD1          | YML038C                 | YMD8          |
| YPR120C                                          | CLB5          | YLR410W                 | VIP1          |
| YPL042C                                          | SSN3          | YDR335W                 | MSN5          |
| YFL013C                                          | IES1          | YLR182W                 | SWI6          |
| YBR057C                                          | MUM2          | YPL152W                 | RRD2          |
| YIL076W                                          | SEC28         | YCL037C                 | SRO9          |
| YFR031C-A                                        | RPL2A         | YNL291C                 | MID1          |



| Predictions at threshold level 0.75 continued... |               |                         |               |
|--------------------------------------------------|---------------|-------------------------|---------------|
| Gene1 of predicted pair                          |               | Gene2 of predicted pair |               |
| Systematic Name                                  | Standard Name | Systematic Name         | Standard Name |
| YML095C                                          | RAD10         | YCR086W                 | CSM1          |
| YER059W                                          | PCL6          | YNL230C                 | ELA1          |
| YJL095W                                          | BCK1          | YHR114W                 | BZZ1          |
| YMR224C                                          | MRE11         | YBL088C                 | TEL1          |
| YNL087W                                          | TCB2          | YLR094C                 | GIS3          |
| YPL152W                                          | RRD2          | YDR183W                 | PLP1          |
| YLR360W                                          | VPS38         | YPL195W                 | APL5          |
| YLR135W                                          | SLX4          | YPL022W                 | RAD1          |
| YKL139W                                          | CTK1          | YER116C                 | SLX8          |
| YOR368W                                          | RAD17         | YNL076W                 | MKS1          |
| YPR084W                                          | YPR084W       | YKL160W                 | ELF1          |
| YMR095C                                          | SNO1          | YOL121C                 | RPS19A        |
| YPL161C                                          | BEM4          | YMR152W                 | YIM1          |
| YKL048C                                          | ELM1          | YDR261C                 | EXG2          |
| YDR254W                                          | CHL4          | YOL091W                 | SPO21         |
| YMR224C                                          | MRE11         | YNL076W                 | MKS1          |
| YBR194W                                          | SOY1          | YML095C                 | RAD10         |
| YMR216C                                          | SKY1          | YER122C                 | GLO3          |
| YOR083W                                          | WHI5          | YLR058C                 | SHM2          |
| YPR072W                                          | NOT5          | YJL140W                 | RPB4          |
| YHR187W                                          | IKI1          | YPL101W                 | ELP4          |
| YMR095C                                          | SNO1          | YKL126W                 | YPK1          |
| YAL024C                                          | LTE1          | YGR188C                 | BUB1          |
| YLR119W                                          | SRN2          | YDR261C                 | EXG2          |
| YNR052C                                          | POP2          | YMR055C                 | BUB2          |
| YDR174W                                          | HMO1          | YLR386W                 | VAC14         |
| YKR072C                                          | SIS2          | YJL124C                 | LSM1          |
| YML103C                                          | NUP188        | YHR111W                 | UBA4          |
| YGL025C                                          | PGD1          | YGR252W                 | GCN5          |

| Predictions at threshold level 0.75 continued... |               |                         |               |
|--------------------------------------------------|---------------|-------------------------|---------------|
| Gene1 of predicted pair                          |               | Gene2 of predicted pair |               |
| Systematic Name                                  | Standard Name | Systematic Name         | Standard Name |
| YJL095W                                          | BCK1          | YER122C                 | GLO3          |
| YPL024W                                          | RMI1          | YHR167W                 | THP2          |
| YLR216C                                          | CPR6          | YFR010W                 | UBP6          |
| YGL163C                                          | RAD54         | YOL081W                 | IRA2          |
| YJL124C                                          | LSM1          | YDR378C                 | LSM6          |
| YPL129W                                          | TAF14         | YGL025C                 | PGD1          |
| YBR173C                                          | UMP1          | YBL025W                 | RRN10         |
| YOR023C                                          | AHC1          | YLR447C                 | VMA6          |
| YML115C                                          | VAN1          | YLR320W                 | MMS22         |
| YER120W                                          | SCS2          | YDR153C                 | ENT5          |
| YGL003C                                          | CDH1          | YDR310C                 | SUM1          |
| YLR399C                                          | BDF1          | YPL248C                 | GAL4          |
| YDL192W                                          | ARF1          | YFL048C                 | EMP47         |
| YDR245W                                          | MNN10         | YNL079C                 | TPM1          |
| YDR335W                                          | MSN5          | YLR032W                 | RAD5          |
| YDR378C                                          | LSM6          | YLR370C                 | ARC18         |
| YKL126W                                          | YPK1          | YJR084W                 | CSN12         |
| YGL033W                                          | HOP2          | YMR230W                 | RPS10B        |
| YHR200W                                          | RPN10         | YJR032W                 | CPR7          |
| YOR195W                                          | SLK19         | YFR036W                 | CDC26         |
| YLR447C                                          | VMA6          | YDL192W                 | ARF1          |
| YPL105C                                          | YPL105C       | YPL234C                 | TFP3          |
| YKL020C                                          | SPT23         | YOR124C                 | UBP2          |
| YDR261C                                          | EXG2          | YER040W                 | GLN3          |
| YDR004W                                          | RAD57         | YER116C                 | SLX8          |
| YJL006C                                          | CTK2          | YKL114C                 | APN1          |
| YGL066W                                          | SGF73         | YOR195W                 | SLK19         |
| YLR234W                                          | TOP3          | YBR082C                 | UBC4          |
| YBR200W                                          | BEM1          | YGL163C                 | RAD54         |

| Predictions at threshold level 0.75 continued... |               |                         |               |
|--------------------------------------------------|---------------|-------------------------|---------------|
| Gene1 of predicted pair                          |               | Gene2 of predicted pair |               |
| Systematic Name                                  | Standard Name | Systematic Name         | Standard Name |
| YAL024C                                          | LTE1          | YNL225C                 | CNM67         |
| YPL024W                                          | RMI1          | YDR156W                 | RPA14         |
| YHR134W                                          | WSS1          | YGR071C                 | YGR071C       |
| YKR020W                                          | VPS51         | YGR105W                 | VMA21         |
| YDR202C                                          | RAV2          | YPR032W                 | SRO7          |
| YIL050W                                          | PCL7          | YGR233C                 | PHO81         |
| YHR013C                                          | ARD1          | YDR076W                 | RAD55         |
| YGR104C                                          | SRB5          | YPL256C                 | CLN2          |
| YBR171W                                          | SEC66         | YDL192W                 | ARF1          |
| YLR120C                                          | YPS1          | YPL161C                 | BEM4          |
| YDL223C                                          | HBT1          | YLR180W                 | SAM1          |
| YJR063W                                          | RPA12         | YJR060W                 | CBF1          |
| YOR275C                                          | RIM20         | YPR119W                 | CLB2          |
| YKR099W                                          | BAS1          | YGL003C                 | CDH1          |
| YMR224C                                          | MRE11         | YJR056C                 | YJR056C       |
| YBR111W-A                                        | SUS1          | YPR072W                 | NOT5          |
| YBR019C                                          | GAL10         | YOR327C                 | SNC2          |
| YPL057C                                          | SUR1          | YLR398C                 | SKI2          |
| YOR358W                                          | HAP5          | YLR447C                 | VMA6          |
| YJR032W                                          | CPR7          | YOR035C                 | SHE4          |
| YMR095C                                          | SNO1          | YLR452C                 | SST2          |
| YHR081W                                          | LRP1          | YDR207C                 | UME6          |
| YOL091W                                          | SPO21         | YNL225C                 | CNM67         |
| YDL080C                                          | THI3          | YBR240C                 | THI2          |
| YGL212W                                          | VAM7          | YLR396C                 | VPS33         |
| YOR290C                                          | SNF2          | YLR320W                 | MMS22         |
| YIL103W                                          | DPH1          | YLR254C                 | NDL1          |
| YEL054C                                          | RPL12A        | YGL246C                 | RAI1          |
| YLR360W                                          | VPS38         | YHR205W                 | SCH9          |

| Predictions at threshold level 0.75 continued... |               |                         |               |
|--------------------------------------------------|---------------|-------------------------|---------------|
| Gene1 of predicted pair                          |               | Gene2 of predicted pair |               |
| Systematic Name                                  | Standard Name | Systematic Name         | Standard Name |
| YCR081W                                          | SRB8          | YOR106W                 | VAM3          |
| YPL057C                                          | SUR1          | YOL081W                 | IRA2          |
| YKR035W-A                                        | DID2          | YLR320W                 | MMS22         |
| YPL057C                                          | SUR1          | YGR270W                 | YTA7          |
| YLR254C                                          | NDL1          | YOL054W                 | PSH1          |
| YMR152W                                          | YIM1          | YPL195W                 | APL5          |
| YIL076W                                          | SEC28         | YNL199C                 | GCR2          |
| YPR051W                                          | MAK3          | YGR270W                 | YTA7          |
| YBR290W                                          | BSD2          | YJL183W                 | MNN11         |
| YBR171W                                          | SEC66         | YHR158C                 | KEL1          |
| YNL325C                                          | FIG4          | YMR311C                 | GLC8          |
| YMR055C                                          | BUB2          | YJR063W                 | RPA12         |
| YML001W                                          | YPT7          | YOL108C                 | INO4          |
| YBL102W                                          | SFT2          | YGR105W                 | VMA21         |
| YIL053W                                          | RHR2          | YOR035C                 | SHE4          |
| YPL079W                                          | RPL21B        | YHR167W                 | THP2          |
| YJR032W                                          | CPR7          | YOL067C                 | RTG1          |
| YCR053W                                          | THR4          | YLR398C                 | SKI2          |
| YGL115W                                          | SNF4          | YDR318W                 | MCM21         |
| YNL242W                                          | ATG2          | YLR431C                 | ATG23         |
| YLR083C                                          | EMP70         | YKR020W                 | VPS51         |
| YOR023C                                          | AHC1          | YIL008W                 | URM1          |
| YMR224C                                          | MRE11         | YDR261C                 | EXG2          |
| YIL005W                                          | EPS1          | YBR170C                 | NPL4          |
| YJL006C                                          | CTK2          | YDR318W                 | MCM21         |
| YER116C                                          | SLX8          | YDR358W                 | GGA1          |
| YHR111W                                          | UBA4          | YOL067C                 | RTG1          |
| YMR095C                                          | SNO1          | YEL060C                 | PRB1          |
| YPR084W                                          | YPR084W       | YNL041C                 | COG6          |

| Predictions at threshold level 0.75 continued... |               |                         |               |
|--------------------------------------------------|---------------|-------------------------|---------------|
| Gene1 of predicted pair                          |               | Gene2 of predicted pair |               |
| Systematic Name                                  | Standard Name | Systematic Name         | Standard Name |
| YBR200W                                          | BEM1          | YGR020C                 | VMA7          |
| YOR106W                                          | VAM3          | YNL051W                 | COG5          |
| YMR199W                                          | CLN1          | YGR252W                 | GCN5          |
| YLR292C                                          | SEC72         | YBL021C                 | HAP3          |
| YNL087W                                          | TCB2          | YDL223C                 | HBT1          |
| YOR080W                                          | DIA2          | YLR315W                 | NKP2          |
| YDR254W                                          | CHL4          | YDL185W                 | TFP1          |
| YHR200W                                          | RPN10         | YPL089C                 | RLM1          |
| YNL307C                                          | MCK1          | YDL077C                 | VAM6          |
| YPL057C                                          | SUR1          | YER162C                 | RAD4          |
| YBR171W                                          | SEC66         | YJR084W                 | CSN12         |
| YLR094C                                          | GIS3          | YDL083C                 | RPS16B        |
| YGL135W                                          | RPL1B         | YAL002W                 | VPS8          |
| YML038C                                          | YMD8          | YGR105W                 | VMA21         |
| YGR020C                                          | VMA7          | YBR127C                 | VMA2          |
| YDL020C                                          | RPN4          | YPL022W                 | RAD1          |
| YPL018W                                          | CTF19         | YDR310C                 | SUM1          |
| YBR126C                                          | TPS1          | YBL103C                 | RTG3          |
| YHR086W                                          | NAM8          | YPL213W                 | LEA1          |
| YLR216C                                          | CPR6          | YPL152W                 | RRD2          |
| YDR484W                                          | VPS52         | YAL030W                 | SNC1          |
| YNL264C                                          | PDR17         | YMR198W                 | CIK1          |
| YBR217W                                          | ATG12         | YBR108W                 | YBR108W       |
| YDR439W                                          | LRS4          | YLR254C                 | NDL1          |
| YKL110C                                          | KTI12         | YDR318W                 | MCM21         |
| YLR079W                                          | SIC1          | YBR107C                 | IML3          |
| YBR171W                                          | SEC66         | YCR077C                 | PAT1          |
| YDR378C                                          | LSM6          | YNL236W                 | SIN4          |
| YOR033C                                          | EXO1          | YOR032C                 | HMS1          |

| Predictions at threshold level 0.75 continued... |               |                         |               |
|--------------------------------------------------|---------------|-------------------------|---------------|
| Gene1 of predicted pair                          |               | Gene2 of predicted pair |               |
| Systematic Name                                  | Standard Name | Systematic Name         | Standard Name |
| YLR447C                                          | VMA6          | YML071C                 | COG8          |
| YBL021C                                          | HAP3          | YGR270W                 | YTA7          |
| YML012W                                          | ERV25         | YEL036C                 | ANP1          |
| YDR156W                                          | RPA14         | YJR060W                 | CBF1          |
| YPR120C                                          | CLB5          | YDR076W                 | RAD55         |
| YKR061W                                          | KTR2          | YAR014C                 | BUD14         |
| YPR084W                                          | YPR084W       | YCR066W                 | RAD18         |
| YIL034C                                          | CAP2          | YGR270W                 | YTA7          |
| YDR335W                                          | MSN5          | YDR289C                 | RTT103        |
| YGL133W                                          | ITC1          | YHR111W                 | UBA4          |
| YNL032W                                          | SIW14         | YMR230W                 | RPS10B        |
| YOR080W                                          | DIA2          | YDL013W                 | SLX5          |
| YDL116W                                          | NUP84         | YBR107C                 | IML3          |
| YPR167C                                          | MET16         | YOR106W                 | VAM3          |
| YGR241C                                          | YAP1802       | YKR001C                 | VPS1          |
| YMR109W                                          | MYO5          | YHR111W                 | UBA4          |
| YPL115C                                          | BEM3          | YHR178W                 | STB5          |
| YLR386W                                          | VAC14         | YFR030W                 | MET10         |
| YNL307C                                          | MCK1          | YOL054W                 | PSH1          |
| YPL086C                                          | ELP3          | YBL071W-A               | KTI11         |
| YPR036W                                          | VMA13         | YPL234C                 | TFP3          |
| YOR368W                                          | RAD17         | YGL148W                 | ARO2          |
| YDL116W                                          | NUP84         | YOL090W                 | MSH2          |
| YLR320W                                          | MMS22         | YLR370C                 | ARC18         |
| YMR216C                                          | SKY1          | YNL107W                 | YAF9          |
| YNL307C                                          | MCK1          | YDR289C                 | RTT103        |
| YBR030W                                          | YBR030W       | YJR032W                 | CPR7          |
| YML115C                                          | VAN1          | YGR133W                 | PEX4          |
| YBR200W                                          | BEM1          | YDR309C                 | GIC2          |

| Predictions at threshold level 0.75 continued... |               |                         |               |
|--------------------------------------------------|---------------|-------------------------|---------------|
| Gene1 of predicted pair                          |               | Gene2 of predicted pair |               |
| Systematic Name                                  | Standard Name | Systematic Name         | Standard Name |
| YFR031C-A                                        | RPL2A         | YKR030W                 | GMH1          |
| YNL264C                                          | PDR17         | YOL051W                 | GAL11         |
| YPL050C                                          | MNN9          | YJL183W                 | MNN11         |
| YHR060W                                          | VMA22         | YLR093C                 | NYV1          |
| YMR224C                                          | MRE11         | YBR073W                 | RDH54         |
| YNL127W                                          | FAR11         | YLR309C                 | IMH1          |
| YMR026C                                          | PEX12         | YJR084W                 | CSN12         |
| YLR381W                                          | CTF3          | YDR318W                 | MCM21         |
| YNL087W                                          | TCB2          | YLR452C                 | SST2          |
| YKL126W                                          | YPK1          | YMR089C                 | YTA12         |
| YJR033C                                          | RAV1          | YAR014C                 | BUD14         |
| YBR290W                                          | BSD2          | YGR188C                 | BUB1          |
| YMR153W                                          | NUP53         | YOR290C                 | SNF2          |
| YEL050C                                          | RML2          | YOR141C                 | ARP8          |
| YGL212W                                          | VAM7          | YML001W                 | YPT7          |
| YBR171W                                          | SEC66         | YLR320W                 | MMS22         |
| YOR127W                                          | RGA1          | YOR358W                 | HAP5          |
| YGL066W                                          | SGF73         | YNL206C                 | RTT106        |
| YBR171W                                          | SEC66         | YMR109W                 | MYO5          |
| YGR104C                                          | SRB5          | YOR290C                 | SNF2          |
| YFR031C-A                                        | RPL2A         | YDR108W                 | GSG1          |
| YMR179W                                          | SPT21         | YPL018W                 | CTF19         |
| YLR079W                                          | SIC1          | YER096W                 | SHC1          |
| YJR024C                                          | MDE1          | YFL047W                 | RGD2          |
| YNL058C                                          | YNL058C       | YLR371W                 | ROM2          |
| YML103C                                          | NUP188        | YJR135C                 | MCM22         |
| YKR046C                                          | PET10         | YKL094W                 | YJU3          |
| YOR195W                                          | SLK19         | YGL003C                 | CDH1          |
| YDR378C                                          | LSM6          | YNL307C                 | MCK1          |

| Predictions at threshold level 0.75 continued... |               |                         |               |
|--------------------------------------------------|---------------|-------------------------|---------------|
| Gene1 of predicted pair                          |               | Gene2 of predicted pair |               |
| Systematic Name                                  | Standard Name | Systematic Name         | Standard Name |
| YER144C                                          | UBP5          | YKR099W                 | BAS1          |
| YPL240C                                          | HSP82         | YGL076C                 | RPL7A         |
| YMR199W                                          | CLN1          | YML102W                 | CAC2          |
| YML016C                                          | PPZ1          | YKL048C                 | ELM1          |
| YDR202C                                          | RAV2          | YJL004C                 | SYS1          |
| YML095C                                          | RAD10         | YHR152W                 | SPO12         |
| YIL076W                                          | SEC28         | YGL212W                 | VAM7          |
| YIL036W                                          | CST6          | YDR183W                 | PLP1          |
| YMR202W                                          | ERG2          | YKR020W                 | VPS51         |
| YMR095C                                          | SNO1          | YMR016C                 | SOK2          |
| YMR116C                                          | ASC1          | YBR082C                 | UBC4          |
| YML115C                                          | VAN1          | YGL003C                 | CDH1          |
| YNR052C                                          | POP2          | YCR086W                 | CSM1          |
| YEL027W                                          | CUP5          | YKL041W                 | VPS24         |
| YOL111C                                          | MDY2          | YOR043W                 | WHI2          |
| YLR234W                                          | TOP3          | YJL095W                 | BCK1          |
| YPL057C                                          | SUR1          | YLR350W                 | ORM2          |
| YNL166C                                          | BNI5          | YJL183W                 | MNN11         |
| YLR337C                                          | VRP1          | YCR077C                 | PAT1          |
| YMR198W                                          | CIK1          | YJR032W                 | CPR7          |
| YBR057C                                          | MUM2          | YOR312C                 | RPL20B        |
| YPL042C                                          | SSN3          | YER122C                 | GLO3          |
| YGR261C                                          | APL6          | YKR020W                 | VPS51         |
| YOL051W                                          | GAL11         | YGR252W                 | GCN5          |
| YNL291C                                          | MID1          | YOL018C                 | TLG2          |
| YJL183W                                          | MNN11         | YLR370C                 | ARC18         |
| YBR108W                                          | YBR108W       | YLR320W                 | MMS22         |
| YMR095C                                          | SNO1          | YER044C                 | ERG28         |
| YNL307C                                          | MCK1          | YDR358W                 | GGA1          |



| Predictions at threshold level 0.75 continued... |               |                         |               |
|--------------------------------------------------|---------------|-------------------------|---------------|
| Gene1 of predicted pair                          |               | Gene2 of predicted pair |               |
| Systematic Name                                  | Standard Name | Systematic Name         | Standard Name |
| YNL291C                                          | MID1          | YNL076W                 | MKS1          |
| YHR013C                                          | ARD1          | YLR182W                 | SWI6          |
| YPL024W                                          | RMI1          | YGL078C                 | DBP3          |
| YMR026C                                          | PEX12         | YDR244W                 | PEX5          |
| YPR029C                                          | APL4          | YNR006W                 | VPS27         |
| YHR205W                                          | SCH9          | YDR456W                 | NHX1          |
| YHR052W                                          | CIC1          | YKL068W                 | NUP100        |
| YLR192C                                          | HCR1          | YML115C                 | VAN1          |
| YNR052C                                          | POP2          | YDR183W                 | PLP1          |
| YDR484W                                          | VPS52         | YPL161C                 | BEM4          |
| YMR179W                                          | SPT21         | YPR036W                 | VMA13         |
| YIL045W                                          | PIG2          | YMR071C                 | TVP18         |
| YGL200C                                          | EMP24         | YDR358W                 | GGA1          |
| YIL156W                                          | UBP7          | YKR024C                 | DBP7          |
| YJL187C                                          | SWE1          | YLR425W                 | TUS1          |
| YLR119W                                          | SRN2          | YOL121C                 | RPS19A        |
| YKR020W                                          | VPS51         | YJL204C                 | RCY1          |
| YHR034C                                          | PIH1          | YCR060W                 | TAH1          |
| YML095C                                          | RAD10         | YBR215W                 | HPC2          |
| YMR055C                                          | BUB2          | YIL008W                 | URM1          |
| YHR156C                                          | LIN1          | YLR093C                 | NYV1          |
| YGR071C                                          | YGR071C       | YDR469W                 | SDC1          |
| YDR378C                                          | LSM6          | YHL002W                 | HSE1          |
| YOR127W                                          | RGA1          | YDR309C                 | GIC2          |
| YPL018W                                          | CTF19         | YNL107W                 | YAF9          |
| YDR318W                                          | MCM21         | YDR310C                 | SUM1          |
| YPR046W                                          | MCM16         | YCR086W                 | CSM1          |
| YGL212W                                          | VAM7          | YJR060W                 | CBF1          |
| YLR079W                                          | SIC1          | YPL161C                 | BEM4          |

| Predictions at threshold level 0.75 continued... |               |                         |               |
|--------------------------------------------------|---------------|-------------------------|---------------|
| Gene1 of predicted pair                          |               | Gene2 of predicted pair |               |
| Systematic Name                                  | Standard Name | Systematic Name         | Standard Name |
| YNL264C                                          | PDR17         | YIL036W                 | CST6          |
| YLR313C                                          | SPH1          | YPR119W                 | CLB2          |
| YDL125C                                          | HNT1          | YMR039C                 | SUB1          |
| YLR435W                                          | TSR2          | YOR368W                 | RAD17         |
| YFR010W                                          | UBP6          | YMR152W                 | YIM1          |
| YGR261C                                          | APL6          | YLR043C                 | TRX1          |
| YNL215W                                          | IES2          | YDR318W                 | MCM21         |
| YNL094W                                          | APP1          | YPL249C                 | GYP5          |
| YFR031C-A                                        | RPL2A         | YGL078C                 | DBP3          |
| YDR320C                                          | SWA2          | YLR309C                 | IMH1          |
| YNL058C                                          | YNL058C       | YER044C                 | ERG28         |
| YHR200W                                          | RPN10         | YPL195W                 | APL5          |
| YPL022W                                          | RAD1          | YLR313C                 | SPH1          |
| YDR378C                                          | LSM6          | YNL199C                 | GCR2          |
| YOR195W                                          | SLK19         | YGR270W                 | YTA7          |
| YBL008W                                          | HIR1          | YHR039C-A               | VMA10         |
| YHR156C                                          | LIN1          | YHR081W                 | LRP1          |
| YKL160W                                          | ELF1          | YOR124C                 | UBP2          |
| YDR358W                                          | GGA1          | YNL076W                 | MKS1          |
| YDR395W                                          | SXM1          | YDL075W                 | RPL31A        |
| YNL288W                                          | CAF40         | YGL237C                 | HAP2          |
| YKR099W                                          | BAS1          | YER139C                 | YER139C       |
| YGR268C                                          | HUA1          | YOR284W                 | HUA2          |
| YHR156C                                          | LIN1          | YOR043W                 | WHI2          |
| YEL053C                                          | MAK10         | YDR153C                 | ENT5          |
| YGL147C                                          | RPL9A         | YHR039C-A               | VMA10         |
| YBL008W                                          | HIR1          | YJR060W                 | CBF1          |
| YNL307C                                          | MCK1          | YAL010C                 | MDM10         |
| YNL087W                                          | TCB2          | YML071C                 | COG8          |

| Predictions at threshold level 0.75 continued... |               |                         |               |
|--------------------------------------------------|---------------|-------------------------|---------------|
| Gene1 of predicted pair                          |               | Gene2 of predicted pair |               |
| Systematic Name                                  | Standard Name | Systematic Name         | Standard Name |
| YLR083C                                          | EMP70         | YNL238W                 | KEX2          |
| YBR283C                                          | SSH1          | YMR022W                 | UBC7          |
| YKL213C                                          | DOA1          | YOR038C                 | HIR2          |
| YBL058W                                          | SHP1          | YKL048C                 | ELM1          |
| YJR090C                                          | GRR1          | YHL002W                 | HSE1          |
| YDR174W                                          | HMO1          | YER116C                 | SLX8          |
| YDL006W                                          | PTC1          | YER122C                 | GLO3          |
| YJR135C                                          | MCM22         | YML028W                 | TSA1          |
| YNL325C                                          | FIG4          | YHR081W                 | LRP1          |
| YMR224C                                          | MRE11         | YJR135C                 | MCM22         |
| YFR010W                                          | UBP6          | YDL184C                 | RPL41A        |
| YBR194W                                          | SOY1          | YJL058C                 | BIT61         |
| YGL115W                                          | SNF4          | YDR358W                 | GGA1          |
| YCR081W                                          | SRB8          | YER049W                 | TPA1          |
| YBR278W                                          | DPB3          | YER161C                 | SPT2          |
| YCL037C                                          | SRO9          | YMR054W                 | STV1          |
| YOR367W                                          | SCP1          | YJL187C                 | SWE1          |
| YBR194W                                          | SOY1          | YGL003C                 | CDH1          |
| YBR127C                                          | VMA2          | YCR088W                 | ABP1          |
| YNL325C                                          | FIG4          | YDL083C                 | RPS16B        |
| YDR080W                                          | VPS41         | YPR051W                 | MAK3          |
| YHR200W                                          | RPN10         | YBL101C                 | ECM21         |
| YJL176C                                          | SWI3          | YMR198W                 | CIK1          |
| YLR447C                                          | VMA6          | YJL183W                 | MNN11         |
| YPR046W                                          | MCM16         | YGL252C                 | RTG2          |
| YNL106C                                          | INP52         | YJL124C                 | LSM1          |
| YBR215W                                          | HPC2          | YML028W                 | TSA1          |
| YOR212W                                          | STE4          | YDR335W                 | MSN5          |
| YPL022W                                          | RAD1          | YGL003C                 | CDH1          |

| Predictions at threshold level 0.75 continued... |               |                         |               |
|--------------------------------------------------|---------------|-------------------------|---------------|
| Gene1 of predicted pair                          |               | Gene2 of predicted pair |               |
| Systematic Name                                  | Standard Name | Systematic Name         | Standard Name |
| YIR017C                                          | MET28         | YJR060W                 | CBF1          |
| YMR153W                                          | NUP53         | YJR084W                 | CSN12         |
| YBR108W                                          | YBR108W       | YPL195W                 | APL5          |
| YGR020C                                          | VMA7          | YJR033C                 | RAV1          |
| YPL120W                                          | VPS30         | YLR309C                 | IMH1          |
| YGR104C                                          | SRB5          | YMR109W                 | MYO5          |
| YLR192C                                          | HCR1          | YFL023W                 | BUD27         |
| YER049W                                          | TPA1          | YEL036C                 | ANP1          |
| YPR018W                                          | RLF2          | YJL095W                 | BCK1          |
| YDL065C                                          | PEX19         | YMR204C                 | INP1          |
| YOR035C                                          | SHE4          | YLR425W                 | TUS1          |
| YER116C                                          | SLX8          | YNL307C                 | MCK1          |
| YJL190C                                          | RPS22A        | YLR233C                 | EST1          |
| YGL033W                                          | HOP2          | YLR370C                 | ARC18         |
| YDR293C                                          | SSD1          | YCR086W                 | CSM1          |
| YOR290C                                          | SNF2          | YNL307C                 | MCK1          |
| YPR052C                                          | NHP6A         | YPL042C                 | SSN3          |
| YDR289C                                          | RTT103        | YLR233C                 | EST1          |
| YOR358W                                          | HAP5          | YMR125W                 | STO1          |
| YNL297C                                          | MON2          | YMR055C                 | BUB2          |
| YPR052C                                          | NHP6A         | YBL008W                 | HIR1          |
| YLR192C                                          | HCR1          | YPL037C                 | EGD1          |
| YHR178W                                          | STB5          | YOR023C                 | AHC1          |
| YOR109W                                          | INP53         | YCL001W                 | RER1          |
| YAL051W                                          | OAF1          | YPR119W                 | CLB2          |
| YKR084C                                          | HBS1          | YNL001W                 | DOM34         |
| YBL003C                                          | HTA2          | YBL002W                 | HTB2          |
| YFL023W                                          | BUD27         | YMR152W                 | YIM1          |
| YPR084W                                          | YPR084W       | YDR440W                 | DOT1          |

| Predictions at threshold level 0.75 continued... |               |                         |               |
|--------------------------------------------------|---------------|-------------------------|---------------|
| Gene1 of predicted pair                          |               | Gene2 of predicted pair |               |
| Systematic Name                                  | Standard Name | Systematic Name         | Standard Name |
| YBL047C                                          | EDE1          | YOR035C                 | SHE4          |
| YLR337C                                          | VRP1          | YBR181C                 | RPS6B         |
| YLR234W                                          | TOP3          | YKL048C                 | ELM1          |
| YDL116W                                          | NUP84         | YGR188C                 | BUB1          |
| YDL056W                                          | MBP1          | YDR335W                 | MSN5          |
| YKL110C                                          | KTI12         | YPL152W                 | RRD2          |
| YNL243W                                          | SLA2          | YOR367W                 | SCP1          |
| YGL223C                                          | COG1          | YLR093C                 | NYV1          |
| YBR108W                                          | YBR108W       | YDR144C                 | MKC7          |
| YPL022W                                          | RAD1          | YDR171W                 | HSP42         |
| YEL065W                                          | SIT1          | YAL024C                 | LTE1          |
| YOR109W                                          | INP53         | YJR060W                 | CBF1          |
| YMR055C                                          | BUB2          | YGL124C                 | MON1          |
| YPL115C                                          | BEM3          | YBR114W                 | RAD16         |
| YEL009C                                          | GCN4          | YOL018C                 | TLG2          |
| YOR043W                                          | WHI2          | YBR036C                 | CSG2          |
| YOR069W                                          | VPS5          | YPR032W                 | SRO7          |
| YLR410W                                          | VIP1          | YLR182W                 | SWI6          |
| YDR004W                                          | RAD57         | YOR195W                 | SLK19         |
| YGL078C                                          | DBP3          | YKR099W                 | BAS1          |
| YER116C                                          | SLX8          | YJR056C                 | YJR056C       |
| YOL086C                                          | ADH1          | YOL151W                 | GRE2          |
| YGL003C                                          | CDH1          | YBL025W                 | RRN10         |
| YHL031C                                          | GOS1          | YGL174W                 | BUD13         |
| YGL003C                                          | CDH1          | YDR207C                 | UME6          |
| YNL288W                                          | CAF40         | YNL107W                 | YAF9          |
| YLR094C                                          | GIS3          | YDR310C                 | SUM1          |
| YMR224C                                          | MRE11         | YJR060W                 | CBF1          |
| YMR127C                                          | SAS2          | YEL053C                 | MAK10         |

| Predictions at threshold level 0.75 continued... |               |                         |               |
|--------------------------------------------------|---------------|-------------------------|---------------|
| Gene1 of predicted pair                          |               | Gene2 of predicted pair |               |
| Systematic Name                                  | Standard Name | Systematic Name         | Standard Name |
| YDR456W                                          | NHX1          | YPL256C                 | CLN2          |
| YPL161C                                          | BEM4          | YPR120C                 | CLB5          |
| YEL051W                                          | VMA8          | YAR014C                 | BUD14         |
| YJR033C                                          | RAV1          | YKL119C                 | VPH2          |
| YOR132W                                          | VPS17         | YJL004C                 | SYS1          |
| YMR038C                                          | CCS1          | YBR082C                 | UBC4          |
| YGL212W                                          | VAM7          | YPR173C                 | VPS4          |
| YHR161C                                          | YAP1801       | YCR088W                 | ABP1          |
| YPL256C                                          | CLN2          | YMR038C                 | CCS1          |
| YGL066W                                          | SGF73         | YFR010W                 | UBP6          |
| YNL025C                                          | SSN8          | YGL025C                 | PGD1          |
| YGR249W                                          | MGA1          | YPL057C                 | SUR1          |
| YER162C                                          | RAD4          | YDR310C                 | SUM1          |
| YJR084W                                          | CSN12         | YBR036C                 | CSG2          |
| YNL032W                                          | SIW14         | YOL081W                 | IRA2          |
| YLR192C                                          | HCR1          | YDR477W                 | SNF1          |
| YJL154C                                          | VPS35         | YGR054W                 | YGR054W       |
| YLR079W                                          | SIC1          | YNL248C                 | RPA49         |
| YHR081W                                          | LRP1          | YLR093C                 | NYV1          |
| YOR023C                                          | AHC1          | YJL183W                 | MNN11         |
| YNL248C                                          | RPA49         | YOR141C                 | ARP8          |
| YMR142C                                          | RPL13B        | YMR133W                 | REC114        |
| YOL043C                                          | NTG2          | YKL114C                 | APN1          |
| YDR144C                                          | MKC7          | YAL002W                 | VPS8          |
| YPR017C                                          | DSS4          | YOR109W                 | INP53         |
| YBR126C                                          | TPS1          | YBL058W                 | SHP1          |
| YLR079W                                          | SIC1          | YDR200C                 | VPS64         |
| YJL136C                                          | RPS21B        | YHR111W                 | UBA4          |
| YPR051W                                          | MAK3          | YDR207C                 | UME6          |

| Predictions at threshold level 0.75 continued... |               |                         |               |
|--------------------------------------------------|---------------|-------------------------|---------------|
| Gene1 of predicted pair                          |               | Gene2 of predicted pair |               |
| Systematic Name                                  | Standard Name | Systematic Name         | Standard Name |
| YKR099W                                          | BAS1          | YJR084W                 | CSN12         |
| YGL033W                                          | HOP2          | YOR035C                 | SHE4          |
| YNL058C                                          | YNL058C       | YGL115W                 | SNF4          |
| YMR095C                                          | SNO1          | YDR261C                 | EXG2          |
| YGL087C                                          | MMS2          | YHR200W                 | RPN10         |
| YOR127W                                          | RGA1          | YDL077C                 | VAM6          |
| YPL253C                                          | VIK1          | YDL047W                 | SIT4          |
| YIL076W                                          | SEC28         | YJR084W                 | CSN12         |
| YGL133W                                          | ITC1          | YNL116W                 | DMA2          |
| YDR363W-A                                        | SEM1          | YKR030W                 | GMH1          |
| YBR127C                                          | VMA2          | YKR001C                 | VPS1          |
| YDR245W                                          | MNN10         | YBR171W                 | SEC66         |
| YIL076W                                          | SEC28         | YOL081W                 | IRA2          |
| YIL076W                                          | SEC28         | YLR350W                 | ORM2          |
| YKL139W                                          | CTK1          | YDL184C                 | RPL41A        |
| YNL325C                                          | FIG4          | YPL161C                 | BEM4          |
| YKL007W                                          | CAP1          | YMR055C                 | BUB2          |
| YLR399C                                          | BDF1          | YKR048C                 | NAP1          |
| YPR131C                                          | NAT3          | YMR038C                 | CCS1          |
| YDR245W                                          | MNN10         | YDR440W                 | DOT1          |
| YOR039W                                          | CKB2          | YLR350W                 | ORM2          |
| YBR094W                                          | PBY1          | YGL100W                 | SEH1          |
| YGL060W                                          | YBP2          | YBR200W                 | BEM1          |
| YML016C                                          | PPZ1          | YOR043W                 | WHI2          |
| YMR016C                                          | SOK2          | YOR043W                 | WHI2          |
| YLR381W                                          | CTF3          | YJR032W                 | CPR7          |
| YIL036W                                          | CST6          | YHR013C                 | ARD1          |
| YLR360W                                          | VPS38         | YJL095W                 | BCK1          |
| YKR072C                                          | SIS2          | YDR310C                 | SUM1          |

| Predictions at threshold level 0.75 continued... |               |                         |               |
|--------------------------------------------------|---------------|-------------------------|---------------|
| Gene1 of predicted pair                          |               | Gene2 of predicted pair |               |
| Systematic Name                                  | Standard Name | Systematic Name         | Standard Name |
| YNL215W                                          | IES2          | YML016C                 | PPZ1          |
| YJR091C                                          | JSN1          | YLR370C                 | ARC18         |
| YAR042W                                          | SWH1          | YOL044W                 | PEX15         |
| YKR001C                                          | VPS1          | YLR064W                 | YLR064W       |
| YDR156W                                          | RPA14         | YDL006W                 | PTC1          |
| YNL291C                                          | MID1          | YPL234C                 | TFP3          |
| YPL001W                                          | HAT1          | YHR039C-A               | VMA10         |
| YML001W                                          | YPT7          | YDR310C                 | SUM1          |
| YLR095C                                          | IOC2          | YGL212W                 | VAM7          |
| YEL065W                                          | SIT1          | YNL041C                 | COG6          |
| YDL083C                                          | RPS16B        | YDR358W                 | GGA1          |
| YNL218W                                          | MGS1          | YGL175C                 | SAE2          |
| YDL161W                                          | ENT1          | YPL045W                 | VPS16         |
| YDR192C                                          | NUP42         | YPR119W                 | CLB2          |
| YKR059W                                          | TIF1          | YLR320W                 | MMS22         |
| YML103C                                          | NUP188        | YNL116W                 | DMA2          |
| YGR209C                                          | TRX2          | YDL138W                 | RGT2          |
| YDL155W                                          | CLB3          | YEL056W                 | HAT2          |
| YLR396C                                          | VPS33         | YGL124C                 | MON1          |
| YNL106C                                          | INP52         | YJR135C                 | MCM22         |
| YOR069W                                          | VPS5          | YGL212W                 | VAM7          |
| YBR173C                                          | UMP1          | YNL032W                 | SIW14         |
| YPL106C                                          | SSE1          | YPL018W                 | CTF19         |
| YDR254W                                          | CHL4          | YAR014C                 | BUD14         |
| YOR191W                                          | RIS1          | YLR135W                 | SLX4          |
| YBR173C                                          | UMP1          | YDR310C                 | SUM1          |
| YJR032W                                          | CPR7          | YDL192W                 | ARF1          |
| YPL253C                                          | VIK1          | YML095C                 | RAD10         |
| YIL140W                                          | AXL2          | YGL054C                 | ERV14         |



| Predictions at threshold level 0.75 continued... |               |                         |               |
|--------------------------------------------------|---------------|-------------------------|---------------|
| Gene1 of predicted pair                          |               | Gene2 of predicted pair |               |
| Systematic Name                                  | Standard Name | Systematic Name         | Standard Name |
| YNL307C                                          | MCK1          | YMR214W                 | SCJ1          |
| YMR153W                                          | NUP53         | YKR035W-A               | DID2          |
| YNL291C                                          | MID1          | YDR207C                 | UME6          |
| YOR008C                                          | SLG1          | YOR014W                 | RTS1          |
| YKL048C                                          | ELM1          | YBL087C                 | RPL23A        |
| YNL041C                                          | COG6          | YFR036W                 | CDC26         |
| YPL121C                                          | MEI5          | YPR119W                 | CLB2          |
| YDR071C                                          | PAA1          | YLR357W                 | RSC2          |
| YPL057C                                          | SUR1          | YCR053W                 | THR4          |
| YDL226C                                          | GCS1          | YJR035W                 | RAD26         |
| YHR161C                                          | YAP1801       | YBR127C                 | VMA2          |
| YGL124C                                          | MON1          | YGL252C                 | RTG2          |
| YNL079C                                          | TPM1          | YFR036W                 | CDC26         |
| YDR448W                                          | ADA2          | YBR009C                 | HHF1          |
| YNL031C                                          | HHT2          | YBR010W                 | HHT1          |
| YFL023W                                          | BUD27         | YLR320W                 | MMS22         |
| YJL029C                                          | VPS53         | YOR035C                 | SHE4          |
| YBL106C                                          | SRO77         | YLR423C                 | ATG17         |
| YLR381W                                          | CTF3          | YKL110C                 | KTI12         |
| YGL153W                                          | PEX14         | YGR077C                 | PEX8          |
| YLR216C                                          | CPR6          | YPL018W                 | CTF19         |
| YNL215W                                          | IES2          | YDR137W                 | RGP1          |
| YDL083C                                          | RPS16B        | YOR035C                 | SHE4          |
| YNR072W                                          | HXT17         | YBR280C                 | SAF1          |
| YGL025C                                          | PGD1          | YNL238W                 | KEX2          |
| YNL025C                                          | SSN8          | YMR038C                 | CCS1          |
| YKL139W                                          | CTK1          | YBR217W                 | ATG12         |
| YDR225W                                          | HTA1          | YDR335W                 | MSN5          |
| YHL019C                                          | APM2          | YKL135C                 | APL2          |

| Predictions at threshold level 0.75 continued... |               |                         |               |
|--------------------------------------------------|---------------|-------------------------|---------------|
| Gene1 of predicted pair                          |               | Gene2 of predicted pair |               |
| Systematic Name                                  | Standard Name | Systematic Name         | Standard Name |
| YGL174W                                          | BUD13         | YOR038C                 | HIR2          |
| YIL002C                                          | INP51         | YBL047C                 | EDE1          |
| YGL253W                                          | HXK2          | YOL067C                 | RTG1          |
| YOR195W                                          | SLK19         | YHR111W                 | UBA4          |
| YGL087C                                          | MMS2          | YGR108W                 | CLB1          |
| YDL184C                                          | RPL41A        | YDR207C                 | UME6          |
| YPL057C                                          | SUR1          | YPR030W                 | CSR2          |
| YKL068W                                          | NUP100        | YKR024C                 | DBP7          |
| YER122C                                          | GLO3          | YDR207C                 | UME6          |
| YLR441C                                          | RPS1A         | YGL124C                 | MON1          |
| YKL126W                                          | YPK1          | YLR441C                 | RPS1A         |
| YDR254W                                          | CHL4          | YKL101W                 | HSL1          |
| YGL151W                                          | NUT1          | YGR188C                 | BUB1          |
| YJR056C                                          | YJR056C       | YMR311C                 | GLC8          |
| YDR439W                                          | LRS4          | YOR141C                 | ARP8          |
| YER110C                                          | KAP123        | YBL079W                 | NUP170        |
| YER116C                                          | SLX8          | YDL223C                 | HBT1          |
| YIL036W                                          | CST6          | YKL041W                 | VPS24         |
| YJL154C                                          | VPS35         | YJL095W                 | BCK1          |
| YMR055C                                          | BUB2          | YOL054W                 | PSH1          |
| YOR066W                                          | MSA1          | YER040W                 | GLN3          |
| YER129W                                          | SAK1          | YGL190C                 | CDC55         |
| YOR275C                                          | RIM20         | YOR043W                 | WHI2          |
| YBR200W                                          | BEM1          | YMR133W                 | REC114        |
| YKL116C                                          | PRR1          | YGL025C                 | PGD1          |
| YNL199C                                          | GCR2          | YFL047W                 | RGD2          |
| YDR335W                                          | MSN5          | YKL110C                 | KTI12         |
| YBR107C                                          | IML3          | YDL047W                 | SIT4          |
| YJL053W                                          | PEP8          | YHR012W                 | VPS29         |

| Predictions at threshold level 0.75 continued... |               |                         |               |
|--------------------------------------------------|---------------|-------------------------|---------------|
| Gene1 of predicted pair                          |               | Gene2 of predicted pair |               |
| Systematic Name                                  | Standard Name | Systematic Name         | Standard Name |
| YBR171W                                          | SEC66         | YBR036C                 | CSG2          |
| YEL050C                                          | RML2          | YJL127C                 | SPT10         |
| YBR057C                                          | MUM2          | YKL101W                 | HSL1          |
| YDR293C                                          | SSD1          | YBR200W                 | BEM1          |
| YHL002W                                          | HSE1          | YGR188C                 | BUB1          |
| YEL053C                                          | MAK10         | YPL137C                 | GIP3          |
| YER162C                                          | RAD4          | YJR033C                 | RAV1          |
| YLR234W                                          | TOP3          | YHR012W                 | VPS29         |
| YDR293C                                          | SSD1          | YNR032W                 | PPG1          |
| YJR083C                                          | ACF4          | YDR507C                 | GIN4          |
| YCR020C-A                                        | MAK31         | YPL234C                 | TFP3          |
| YGR019W                                          | UGA1          | YCR086W                 | CSM1          |
| YJR005W                                          | APL1          | YPL259C                 | APM1          |
| YER162C                                          | RAD4          | YDL192W                 | ARF1          |
| YDR001C                                          | NTH1          | YPR119W                 | CLB2          |
| YLR360W                                          | VPS38         | YML038C                 | YMD8          |
| YMR223W                                          | UBP8          | YBR111W-A               | SUS1          |
| YHR178W                                          | STB5          | YPR051W                 | MAK3          |
| YDL223C                                          | HBT1          | YPR046W                 | MCM16         |
| YMR016C                                          | SOK2          | YGL212W                 | VAM7          |
| YOR043W                                          | WHI2          | YOR066W                 | MSA1          |
| YPR018W                                          | RLF2          | YGL175C                 | SAE2          |
| YPL024W                                          | RMI1          | YDL083C                 | RPS16B        |
| YML103C                                          | NUP188        | YGL016W                 | KAP122        |
| YKR020W                                          | VPS51         | YHL002W                 | HSE1          |
| YNL325C                                          | FIG4          | YER116C                 | SLX8          |
| YML115C                                          | VAN1          | YML071C                 | COG8          |
| YBR114W                                          | RAD16         | YLR233C                 | EST1          |
| YNL027W                                          | CRZ1          | YJL164C                 | TPK1          |

| Predictions at threshold level 0.75 continued... |               |                         |               |
|--------------------------------------------------|---------------|-------------------------|---------------|
| Gene1 of predicted pair                          |               | Gene2 of predicted pair |               |
| Systematic Name                                  | Standard Name | Systematic Name         | Standard Name |
| YBR171W                                          | SEC66         | YMR230W                 | RPS10B        |
| YJR005W                                          | APL1          | YLR370C                 | ARC18         |
| YBL025W                                          | RRN10         | YER040W                 | GLN3          |
| YOR043W                                          | WHI2          | YPR046W                 | MCM16         |
| YLR090W                                          | XDJ1          | YBL058W                 | SHP1          |
| YER116C                                          | SLX8          | YBL025W                 | RRN10         |
| YDL006W                                          | PTC1          | YHL011C                 | PRS3          |
| YJL176C                                          | SWI3          | YOR080W                 | DIA2          |
| YJL036W                                          | SNX4          | YKR020W                 | VPS51         |
| YMR054W                                          | STV1          | YNL127W                 | FAR11         |
| YMR199W                                          | CLN1          | YDR207C                 | UME6          |
| YOL121C                                          | RPS19A        | YMR230W                 | RPS10B        |
| YHR205W                                          | SCH9          | YLR425W                 | TUS1          |
| YLR180W                                          | SAM1          | YMR230W                 | RPS10B        |
| YOR083W                                          | WHI5          | YCR065W                 | HCM1          |
| YAL024C                                          | LTE1          | YJL172W                 | CPS1          |
| YIL076W                                          | SEC28         | YMR230W                 | RPS10B        |
| YDL006W                                          | PTC1          | YLR371W                 | ROM2          |
| YKL048C                                          | ELM1          | YPL089C                 | RLM1          |
| YMR039C                                          | SUB1          | YLR381W                 | CTF3          |
| YGL060W                                          | YBP2          | YPR046W                 | MCM16         |
| YBR200W                                          | BEM1          | YMR202W                 | ERG2          |
| YDL020C                                          | RPN4          | YMR109W                 | MYO5          |
| YLL039C                                          | UBI4          | YDR129C                 | SAC6          |
| YBR057C                                          | MUM2          | YPL018W                 | CTF19         |
| YCL001W                                          | RER1          | YGR105W                 | VMA21         |
| YHR073W                                          | OSH3          | YPL246C                 | RBD2          |
| YHR178W                                          | STB5          | YBR114W                 | RAD16         |
| YKL025C                                          | PAN3          | YKL048C                 | ELM1          |

| Predictions at threshold level 0.75 continued... |               |                         |               |
|--------------------------------------------------|---------------|-------------------------|---------------|
| Gene1 of predicted pair                          |               | Gene2 of predicted pair |               |
| Systematic Name                                  | Standard Name | Systematic Name         | Standard Name |
| YCR066W                                          | RAD18         | YOL018C                 | TLG2          |
| YGR270W                                          | YTA7          | YHL002W                 | HSE1          |
| YHR178W                                          | STB5          | YLR320W                 | MMS22         |
| YBR200W                                          | BEM1          | YLR233C                 | EST1          |
| YDL002C                                          | NHP10         | YDR289C                 | RTT103        |
| YDR254W                                          | CHL4          | YGR054W                 | YGR054W       |
| YLR320W                                          | MMS22         | YER122C                 | GLO3          |
| YGL025C                                          | PGD1          | YJL140W                 | RPB4          |
| YFR009W                                          | GCN20         | YJL189W                 | RPL39         |
| YCL001W                                          | RER1          | YHL020C                 | OPI1          |
| YNR072W                                          | HXT17         | YHR200W                 | RPN10         |
| YIL034C                                          | CAP2          | YER110C                 | KAP123        |
| YOR033C                                          | EXO1          | YPL256C                 | CLN2          |
| YLR083C                                          | EMP70         | YNL297C                 | MON2          |
| YNL068C                                          | FKH2          | YDR507C                 | GIN4          |
| YNL079C                                          | TPM1          | YEL036C                 | ANP1          |
| YOR195W                                          | SLK19         | YOR368W                 | RAD17         |
| YNL201C                                          | PSY2          | YPL152W                 | RRD2          |
| YFR030W                                          | MET10         | YGR188C                 | BUB1          |
| YLR452C                                          | SST2          | YER040W                 | GLN3          |
| YCR020C-A                                        | MAK31         | YER162C                 | RAD4          |
| YBR215W                                          | HPC2          | YOR038C                 | HIR2          |
| YEL053C                                          | MAK10         | YPL018W                 | CTF19         |
| YLR422W                                          | YLR422W       | YNR064C                 | YNR064C       |
| YKR072C                                          | SIS2          | YDL002C                 | NHP10         |
| YAL016W                                          | TPD3          | YPR040W                 | TIP41         |
| YHR134W                                          | WSS1          | YJR035W                 | RAD26         |
| YGR081C                                          | SLX9          | YOR001W                 | RRP6          |
| YGL250W                                          | RMR1          | YOL081W                 | IRA2          |

| Predictions at threshold level 0.75 continued... |               |                         |               |
|--------------------------------------------------|---------------|-------------------------|---------------|
| Gene1 of predicted pair                          |               | Gene2 of predicted pair |               |
| Systematic Name                                  | Standard Name | Systematic Name         | Standard Name |
| YBR194W                                          | SOY1          | YER118C                 | SHO1          |
| YJL172W                                          | CPS1          | YKL126W                 | YPK1          |
| YJL058C                                          | BIT61         | YPL106C                 | SSE1          |
| YPL096C-A                                        | ERI1          | YEL044W                 | IES6          |
| YPL037C                                          | EGD1          | YOL121C                 | RPS19A        |
| YGR261C                                          | APL6          | YHR012W                 | VPS29         |
| YLR452C                                          | SST2          | YDR318W                 | MCM21         |
| YML115C                                          | VAN1          | YML016C                 | PPZ1          |
| YHR178W                                          | STB5          | YML016C                 | PPZ1          |
| YER144C                                          | UBP5          | YKL048C                 | ELM1          |
| YAL010C                                          | MDM10         | YIL103W                 | DPH1          |
| YKL161C                                          | YKL161C       | YOL081W                 | IRA2          |
| YHR152W                                          | SPO12         | YOR275C                 | RIM20         |
| YBR031W                                          | RPL4A         | YHR203C                 | RPS4B         |
| YMR054W                                          | STV1          | YKR030W                 | GMH1          |
| YLR234W                                          | TOP3          | YOL043C                 | NTG2          |
| YNL243W                                          | SLA2          | YJR125C                 | ENT3          |
| YBR108W                                          | YBR108W       | YMR311C                 | GLC8          |
| YNR072W                                          | HXT17         | YLR370C                 | ARC18         |
| YCL037C                                          | SRO9          | YAL002W                 | VPS8          |
| YPL018W                                          | CTF19         | YGL003C                 | CDH1          |
| YDR174W                                          | HMO1          | YPL022W                 | RAD1          |
| YHR134W                                          | WSS1          | YNL248C                 | RPA49         |
| YDL002C                                          | NHP10         | YCL037C                 | SRO9          |
| YBR200W                                          | BEM1          | YDR484W                 | VPS52         |
| YOL121C                                          | RPS19A        | YER122C                 | GLO3          |
| YMR224C                                          | MRE11         | YKL139W                 | CTK1          |
| YKL007W                                          | CAP1          | YDL226C                 | GCS1          |
| YDR129C                                          | SAC6          | YBR127C                 | VMA2          |

| Predictions at threshold level 0.75 continued... |               |                         |               |
|--------------------------------------------------|---------------|-------------------------|---------------|
| Gene1 of predicted pair                          |               | Gene2 of predicted pair |               |
| Systematic Name                                  | Standard Name | Systematic Name         | Standard Name |
| YPR018W                                          | RLF2          | YPL022W                 | RAD1          |
| YOL044W                                          | PEX15         | YJL095W                 | BCK1          |
| YNL094W                                          | APP1          | YHR114W                 | BZZ1          |
| YGL060W                                          | YBP2          | YJR060W                 | CBF1          |
| YPL129W                                          | TAF14         | YLR182W                 | SWI6          |
| YDR129C                                          | SAC6          | YKR001C                 | VPS1          |
| YIR005W                                          | IST3          | YCR086W                 | CSM1          |
| YBR260C                                          | RGD1          | YDR207C                 | UME6          |
| YDR225W                                          | HTA1          | YGL241W                 | KAP114        |
| YBL051C                                          | PIN4          | YDR155C                 | CPR1          |
| YDR142C                                          | PEX7          | YDR265W                 | PEX10         |
| YGL212W                                          | VAM7          | YOL111C                 | MDY2          |
| YKL116C                                          | PRR1          | YDL083C                 | RPS16B        |
| YKL025C                                          | PAN3          | YGR188C                 | BUB1          |
| YGR081C                                          | SLX9          | YML095C                 | RAD10         |
| YBR108W                                          | YBR108W       | YBR036C                 | CSG2          |
| YJL127C                                          | SPT10         | YJR135C                 | MCM22         |
| YEL065W                                          | SIT1          | YMR038C                 | CCS1          |
| YNL106C                                          | INP52         | YCR086W                 | CSM1          |
| YHR016C                                          | YSC84         | YOR284W                 | HUA2          |
| YLR170C                                          | APS1          | YKR001C                 | VPS1          |
| YAL024C                                          | LTE1          | YDR254W                 | CHL4          |
| YMR224C                                          | MRE11         | YOR080W                 | DIA2          |
| YOR141C                                          | ARP8          | YOL054W                 | PSH1          |
| YDR244W                                          | PEX5          | YGL153W                 | PEX14         |
| YML001W                                          | YPT7          | YLR370C                 | ARC18         |
| YKL126W                                          | YPK1          | YKR099W                 | BAS1          |
| YGL147C                                          | RPL9A         | YHR156C                 | LIN1          |
| YBL021C                                          | HAP3          | YBR171W                 | SEC66         |

| Predictions at threshold level 0.75 continued... |               |                         |               |
|--------------------------------------------------|---------------|-------------------------|---------------|
| Gene1 of predicted pair                          |               | Gene2 of predicted pair |               |
| Systematic Name                                  | Standard Name | Systematic Name         | Standard Name |
| YML095C                                          | RAD10         | YPL106C                 | SSE1          |
| YML109W                                          | ZDS2          | YCL032W                 | STE50         |
| YPL024W                                          | RMI1          | YFR010W                 | UBP6          |
| YER096W                                          | SHC1          | YHR012W                 | VPS29         |
| YJL154C                                          | VPS35         | YDR310C                 | SUM1          |
| YLR181C                                          | VTA1          | YDR486C                 | VPS60         |
| YHR012W                                          | VPS29         | YPL256C                 | CLN2          |
| YMR004W                                          | MVP1          | YPL195W                 | APL5          |
| YNL166C                                          | BNI5          | YGL151W                 | NUT1          |
| YNL032W                                          | SIW14         | YHR060W                 | VMA22         |
| YKL139W                                          | CTK1          | YHR081W                 | LRP1          |
| YDR156W                                          | RPA14         | YHR115C                 | DMA1          |
| YOR112W                                          | CEX1          | YGR105W                 | VMA21         |
| YDL116W                                          | NUP84         | YOR033C                 | EXO1          |
| YPL057C                                          | SUR1          | YPL137C                 | GIP3          |
| YHR030C                                          | SLT2          | YER099C                 | PRS2          |
| YIL076W                                          | SEC28         | YNL238W                 | KEX2          |
| YDR265W                                          | PEX10         | YDL065C                 | PEX19         |
| YJL183W                                          | MNN11         | YBL101C                 | ECM21         |
| YLR079W                                          | SIC1          | YFR034C                 | PHO4          |
| YBR195C                                          | MSI1          | YEL056W                 | HAT2          |
| YBR200W                                          | BEM1          | YOR106W                 | VAM3          |
| YDL101C                                          | DUN1          | YDL013W                 | SLX5          |
| YJL006C                                          | CTK2          | YLR254C                 | NDL1          |
| YER144C                                          | UBP5          | YDR358W                 | GGA1          |
| YBR127C                                          | VMA2          | YOR036W                 | PEP12         |
| YHR171W                                          | ATG7          | YHR161C                 | YAP1801       |
| YBR194W                                          | SOY1          | YNL199C                 | GCR2          |
| YPL129W                                          | TAF14         | YNL059C                 | ARP5          |



| Predictions at threshold level 0.75 continued... |               |                         |               |
|--------------------------------------------------|---------------|-------------------------|---------------|
| Gene1 of predicted pair                          |               | Gene2 of predicted pair |               |
| Systematic Name                                  | Standard Name | Systematic Name         | Standard Name |
| YFL013C                                          | IES1          | YKL213C                 | DOA1          |
| YLR148W                                          | PEP3          | YPL045W                 | VPS16         |
| YDR202C                                          | RAV2          | YML038C                 | YMD8          |
| YLR058C                                          | SHM2          | YLR370C                 | ARC18         |
| YJL127C                                          | SPT10         | YGL003C                 | CDH1          |
| YLR093C                                          | NYV1          | YER122C                 | GLO3          |
| YNL032W                                          | SIW14         | YBR036C                 | CSG2          |
| YCR065W                                          | HCM1          | YLR079W                 | SIC1          |
| YMR039C                                          | SUB1          | YPL018W                 | CTF19         |
| YAL051W                                          | OAF1          | YPL001W                 | HAT1          |
| YCR020C-A                                        | MAK31         | YHL031C                 | GOS1          |
| YLR386W                                          | VAC14         | YPL195W                 | APL5          |
| YHR114W                                          | BZZ1          | YNL107W                 | YAF9          |
| YLR148W                                          | PEP3          | YGL124C                 | MON1          |
| YLR083C                                          | EMP70         | YPR017C                 | DSS4          |
| YOR332W                                          | VMA4          | YHR060W                 | VMA22         |
| YDL184C                                          | RPL41A        | YER122C                 | GLO3          |
| YLR292C                                          | SEC72         | YCL001W                 | RER1          |
| YML115C                                          | VAN1          | YGL215W                 | CLG1          |
| YML016C                                          | PPZ1          | YBL047C                 | EDE1          |
| YDR265W                                          | PEX10         | YGR077C                 | PEX8          |
| YGR040W                                          | KSS1          | YBR083W                 | TEC1          |
| YOR066W                                          | MSA1          | YLR398C                 | SKI2          |
| YLR441C                                          | RPS1A         | YNL058C                 | YNL058C       |
| YPR018W                                          | RLF2          | YOR014W                 | RTS1          |
| YML001W                                          | YPT7          | YPL120W                 | VPS30         |
| YCL037C                                          | SRO9          | YNL238W                 | KEX2          |
| YPL024W                                          | RMI1          | YBR171W                 | SEC66         |
| YDR318W                                          | MCM21         | YGR188C                 | BUB1          |

| Predictions at threshold level 0.75 continued... |               |                         |               |
|--------------------------------------------------|---------------|-------------------------|---------------|
| Gene1 of predicted pair                          |               | Gene2 of predicted pair |               |
| Systematic Name                                  | Standard Name | Systematic Name         | Standard Name |
| YOR132W                                          | VPS17         | YJL095W                 | BCK1          |
| YBR171W                                          | SEC66         | YLR182W                 | SWI6          |
| YGL223C                                          | COG1          | YLR309C                 | IMH1          |
| YLL007C                                          | YLL007C       | YHL002W                 | HSE1          |
| YNL215W                                          | IES2          | YDR440W                 | DOT1          |
| YMR216C                                          | SKY1          | YNL041C                 | COG6          |
| YKL139W                                          | CTK1          | YER161C                 | SPT2          |
| YFR024C-A                                        | LSB3          | YNL094W                 | APP1          |
| YDL116W                                          | NUP84         | YNL106C                 | INP52         |
| YER144C                                          | UBP5          | YKL126W                 | YPK1          |
| YPL157W                                          | TGS1          | YPR119W                 | CLB2          |
| YKR001C                                          | VPS1          | YPR120C                 | CLB5          |
| YIL159W                                          | BNR1          | YHR200W                 | RPN10         |
| YDR245W                                          | MNN10         | YKL160W                 | ELF1          |
| YNL291C                                          | MID1          | YFL033C                 | RIM15         |
| YNL215W                                          | IES2          | YDR310C                 | SUM1          |
| YBR108W                                          | YBR108W       | YDR207C                 | UME6          |
| YGR283C                                          | YGR283C       | YMR310C                 | YMR310C       |
| YLR095C                                          | IOC2          | YGL003C                 | CDH1          |
| YJR032W                                          | CPR7          | YOR368W                 | RAD17         |
| YBL003C                                          | HTA2          | YGR275W                 | RTT102        |
| YFL023W                                          | BUD27         | YLR352W                 | YLR352W       |
| YPL115C                                          | BEM3          | YHR114W                 | BZZ1          |
| YDR363W-A                                        | SEM1          | YLR306W                 | UBC12         |
| YHR134W                                          | WSS1          | YDR183W                 | PLP1          |
| YDL059C                                          | RAD59         | YML102W                 | CAC2          |
| YOR195W                                          | SLK19         | YPL161C                 | BEM4          |
| YKL010C                                          | UFD4          | YLR370C                 | ARC18         |
| YBR030W                                          | YBR030W       | YBR019C                 | GAL10         |

| Predictions at threshold level 0.75 continued... |               |                         |               |
|--------------------------------------------------|---------------|-------------------------|---------------|
| Gene1 of predicted pair                          |               | Gene2 of predicted pair |               |
| Systematic Name                                  | Standard Name | Systematic Name         | Standard Name |
| YOR141C                                          | ARP8          | YKL041W                 | VPS24         |
| YBR030W                                          | YBR030W       | YMR214W                 | SCJ1          |
| YDR153C                                          | ENT5          | YNL107W                 | YAF9          |
| YKR061W                                          | KTR2          | YHR111W                 | UBA4          |
| YNL291C                                          | MID1          | YCL037C                 | SRO9          |
| YLR234W                                          | TOP3          | YMR106C                 | YKU80         |
| YIL159W                                          | BNR1          | YOL121C                 | RPS19A        |
| YOR195W                                          | SLK19         | YGL115W                 | SNF4          |
| YBL102W                                          | SFT2          | YGL054C                 | ERV14         |
| YGR019W                                          | UGA1          | YGR270W                 | YTA7          |
| YHR084W                                          | STE12         | YBR127C                 | VMA2          |
| YOR001W                                          | RRP6          | YDL226C                 | GCS1          |
| YLR429W                                          | CRN1          | YOR035C                 | SHE4          |
| YGL087C                                          | MMS2          | YNL107W                 | YAF9          |
| YLR095C                                          | IOC2          | YCR053W                 | THR4          |
| YML016C                                          | PPZ1          | YCR031C                 | RPS14A        |
| YHR200W                                          | RPN10         | YJL117W                 | PHO86         |
| YPR084W                                          | YPR084W       | YLR350W                 | ORM2          |
| YBL008W                                          | HIR1          | YKR059W                 | TIF1          |
| YPL037C                                          | EGD1          | YLR452C                 | SST2          |
| YJR135C                                          | MCM22         | YJR090C                 | GRR1          |
| YOR127W                                          | RGA1          | YPL037C                 | EGD1          |
| YOR069W                                          | VPS5          | YOL018C                 | TLG2          |
| YPL037C                                          | EGD1          | YJL183W                 | MNN11         |
| YGL223C                                          | COG1          | YDR310C                 | SUM1          |
| YLR381W                                          | CTF3          | YMR202W                 | ERG2          |
| YPL018W                                          | CTF19         | YLR182W                 | SWI6          |
| YOR001W                                          | RRP6          | YPL253C                 | VIK1          |
| YBR126C                                          | TPS1          | YNL238W                 | KEX2          |

| Predictions at threshold level 0.75 continued... |               |                         |               |
|--------------------------------------------------|---------------|-------------------------|---------------|
| Gene1 of predicted pair                          |               | Gene2 of predicted pair |               |
| Systematic Name                                  | Standard Name | Systematic Name         | Standard Name |
| YER144C                                          | UBP5          | YOR290C                 | SNF2          |
| YDR443C                                          | SSN2          | YJL183W                 | MNN11         |
| YER116C                                          | SLX8          | YPR036W                 | VMA13         |
| YGL016W                                          | KAP122        | YML057W                 | CMP2          |
| YBR158W                                          | AMN1          | YGL003C                 | CDH1          |
| YGR054W                                          | YGR054W       | YIL008W                 | URM1          |
| YLR119W                                          | SRN2          | YML071C                 | COG8          |
| YHR060W                                          | VMA22         | YLR180W                 | SAM1          |
| YML062C                                          | MFT1          | YHR167W                 | THP2          |
| YDR156W                                          | RPA14         | YJL183W                 | MNN11         |
| YLR095C                                          | IOC2          | YNL041C                 | COG6          |
| YLR079W                                          | SIC1          | YJL058C                 | BIT61         |
| YHR079C                                          | IRE1          | YDR448W                 | ADA2          |
| YNL307C                                          | MCK1          | YMR038C                 | CCS1          |
| YHR200W                                          | RPN10         | YDR261C                 | EXG2          |
| YOR337W                                          | TEA1          | YOR066W                 | MSA1          |
| YML115C                                          | VAN1          | YBR260C                 | RGD1          |
| YPL018W                                          | CTF19         | YJL095W                 | BCK1          |
| YLR234W                                          | TOP3          | YDR289C                 | RTT103        |
| YML103C                                          | NUP188        | YIR005W                 | IST3          |
| YDR108W                                          | GSG1          | YGR105W                 | VMA21         |
| YGR133W                                          | PEX4          | YBR181C                 | RPS6B         |
| YER116C                                          | SLX8          | YPL018W                 | CTF19         |
| YGL174W                                          | BUD13         | YDR363W-A               | SEM1          |
| YNL325C                                          | FIG4          | YDR261C                 | EXG2          |
| YCL001W                                          | RER1          | YOR327C                 | SNC2          |
| YNL248C                                          | RPA49         | YJL006C                 | CTK2          |
| YGR054W                                          | YGR054W       | YGL124C                 | MON1          |
| YHR161C                                          | YAP1801       | YNL238W                 | KEX2          |

| Predictions at threshold level 0.75 continued... |               |                         |               |
|--------------------------------------------------|---------------|-------------------------|---------------|
| Gene1 of predicted pair                          |               | Gene2 of predicted pair |               |
| Systematic Name                                  | Standard Name | Systematic Name         | Standard Name |
| YBL008W                                          | HIR1          | YMR198W                 | CIK1          |
| YBR215W                                          | HPC2          | YNL199C                 | GCR2          |
| YLR234W                                          | TOP3          | YGR054W                 | YGR054W       |
| YGL147C                                          | RPL9A         | YEL053C                 | MAK10         |
| YGL241W                                          | KAP114        | YBR009C                 | HHF1          |
| YJR140C                                          | HIR3          | YBR215W                 | HPC2          |
| YDR383C                                          | NKP1          | YDR174W                 | HMO1          |
| YPR049C                                          | ATG11         | YOL082W                 | ATG19         |
| YJL060W                                          | BNA3          | YOR195W                 | SLK19         |
| YML115C                                          | VAN1          | YNL058C                 | YNL058C       |
| YNL289W                                          | PCL1          | YLR258W                 | GSY2          |
| YHR081W                                          | LRP1          | YFR036W                 | CDC26         |
| YGR108W                                          | CLB1          | YJR060W                 | CBF1          |
| YLR119W                                          | SRN2          | YDR137W                 | RGP1          |
| YDL083C                                          | RPS16B        | YDR261C                 | EXG2          |
| YDR484W                                          | VPS52         | YHR161C                 | YAP1801       |
| YNL201C                                          | PSY2          | YDR254W                 | CHL4          |
| YGL025C                                          | PGD1          | YGL003C                 | CDH1          |
| YDL116W                                          | NUP84         | YML028W                 | TSA1          |
| YPL050C                                          | MNN9          | YNL238W                 | KEX2          |
| YPR084W                                          | YPR084W       | YOR132W                 | VPS17         |
| YLR119W                                          | SRN2          | YPR030W                 | CSR2          |
| YDR363W-A                                        | SEM1          | YOR124C                 | UBP2          |
| YOR106W                                          | VAM3          | YHR012W                 | VPS29         |
| YMR068W                                          | AVO2          | YNL135C                 | FPR1          |
| YMR224C                                          | MRE11         | YLR398C                 | SKI2          |
| YMR224C                                          | MRE11         | YBR057C                 | MUM2          |
| YOR358W                                          | HAP5          | YNL107W                 | YAF9          |
| YJL006C                                          | CTK2          | YHL002W                 | HSE1          |

| Predictions at threshold level 0.75 continued... |               |                         |               |
|--------------------------------------------------|---------------|-------------------------|---------------|
| Gene1 of predicted pair                          |               | Gene2 of predicted pair |               |
| Systematic Name                                  | Standard Name | Systematic Name         | Standard Name |
| YPL042C                                          | SSN3          | YNL199C                 | GCR2          |
| YGR252W                                          | GCN5          | YPL256C                 | CLN2          |
| YMR202W                                          | ERG2          | YPL161C                 | BEM4          |
| YLR315W                                          | NKP2          | YIR005W                 | IST3          |
| YLR234W                                          | TOP3          | YER161C                 | SPT2          |
| YHR134W                                          | WSS1          | YCR086W                 | CSM1          |
| YPL037C                                          | EGD1          | YNL076W                 | MKS1          |
| YPL178W                                          | CBC2          | YPL256C                 | CLN2          |
| YGL151W                                          | NUT1          | YOL067C                 | RTG1          |
| YFR010W                                          | UBP6          | YGL124C                 | MON1          |
| YBR107C                                          | IML3          | YKL101W                 | HSL1          |
| YOR140W                                          | SFL1          | YOR008C                 | SLG1          |
| YLR090W                                          | XDJ1          | YCR053W                 | THR4          |
| YNL288W                                          | CAF40         | YJL183W                 | MNN11         |
| YDR004W                                          | RAD57         | YGL175C                 | SAE2          |
| YDR378C                                          | LSM6          | YEL013W                 | VAC8          |
| YOR290C                                          | SNF2          | YLR176C                 | RFX1          |
| YOR337W                                          | TEA1          | YOL121C                 | RPS19A        |
| YGL147C                                          | RPL9A         | YOL081W                 | IRA2          |
| YPL037C                                          | EGD1          | YLR180W                 | SAM1          |
| YDR244W                                          | PEX5          | YDL078C                 | MDH3          |
| YBR217W                                          | ATG12         | YPR046W                 | MCM16         |
| YNL243W                                          | SLA2          | YIL084C                 | SDS3          |
| YGL078C                                          | DBP3          | YBR108W                 | YBR108W       |
| YCR020C-A                                        | MAK31         | YDR202C                 | RAV2          |
| YMR116C                                          | ASC1          | YFR036W                 | CDC26         |
| YMR224C                                          | MRE11         | YER040W                 | GLN3          |
| YNR072W                                          | HXT17         | YPR046W                 | MCM16         |
| YLR386W                                          | VAC14         | YPR046W                 | MCM16         |

| Predictions at threshold level 0.75 continued... |               |                         |               |
|--------------------------------------------------|---------------|-------------------------|---------------|
| Gene1 of predicted pair                          |               | Gene2 of predicted pair |               |
| Systematic Name                                  | Standard Name | Systematic Name         | Standard Name |
| YDR378C                                          | LSM6          | YOR124C                 | UBP2          |
| YGR104C                                          | SRB5          | YMR199W                 | CLN1          |
| YDR108W                                          | GSG1          | YML001W                 | YPT7          |
| YPL256C                                          | CLN2          | YGR152C                 | RSR1          |
| YMR025W                                          | CSI1          | YOL117W                 | RRI2          |
| YGR072W                                          | UPF3          | YNL051W                 | COG5          |
| YER110C                                          | KAP123        | YPR046W                 | MCM16         |
| YBR217W                                          | ATG12         | YKR035W-A               | DID2          |
| YDL101C                                          | DUN1          | YAL015C                 | NTG1          |
| YMR224C                                          | MRE11         | YOL121C                 | RPS19A        |
| YMR022W                                          | UBC7          | YDR310C                 | SUM1          |
| YDL077C                                          | VAM6          | YLR370C                 | ARC18         |
| YLR320W                                          | MMS22         | YNL041C                 | COG6          |
| YGL212W                                          | VAM7          | YPL161C                 | BEM4          |
| YDR379W                                          | RGA2          | YKL101W                 | HSL1          |
| YCR065W                                          | HCM1          | YLR370C                 | ARC18         |
| YLR094C                                          | GIS3          | YJR025C                 | BNA1          |
| YDL192W                                          | ARF1          | YMR230W                 | RPS10B        |
| YOR141C                                          | ARP8          | YGL252C                 | RTG2          |
| YKR099W                                          | BAS1          | YPL137C                 | GIP3          |
| YNR052C                                          | POP2          | YGR252W                 | GCN5          |
| YBR126C                                          | TPS1          | YNL087W                 | TCB2          |
| YMR016C                                          | SOK2          | YJL095W                 | BCK1          |
| YLR234W                                          | TOP3          | YLR452C                 | SST2          |
| YNL145W                                          | MFA2          | YNL147W                 | LSM7          |
| YLR292C                                          | SEC72         | YML016C                 | PPZ1          |
| YMR133W                                          | REC114        | YLR398C                 | SKI2          |
| YIL034C                                          | CAP2          | YGL253W                 | HXK2          |
| YLR095C                                          | IOC2          | YLR452C                 | SST2          |

| Predictions at threshold level 0.75 continued... |               |                         |               |
|--------------------------------------------------|---------------|-------------------------|---------------|
| Gene1 of predicted pair                          |               | Gene2 of predicted pair |               |
| Systematic Name                                  | Standard Name | Systematic Name         | Standard Name |
| YBR084C-A                                        | RPL19A        | YDR363W-A               | SEM1          |
| YDR137W                                          | RGP1          | YNL199C                 | GCR2          |
| YDR293C                                          | SSD1          | YMR004W                 | MVP1          |
| YBR239C                                          | YBR239C       | YGR268C                 | HUA1          |
| YGL134W                                          | PCL10         | YLR258W                 | GSY2          |
| YLR192C                                          | HCR1          | YKL048C                 | ELM1          |
| YFR010W                                          | UBP6          | YMR311C                 | GLC8          |
| YAL024C                                          | LTE1          | YMR153W                 | NUP53         |
| YDR318W                                          | MCM21         | YLR182W                 | SWI6          |
| YER162C                                          | RAD4          | YER040W                 | GLN3          |
| YDR004W                                          | RAD57         | YGL087C                 | MMS2          |
| YIL159W                                          | BNR1          | YBL025W                 | RRN10         |
| YHR039C-A                                        | VMA10         | YER139C                 | YER139C       |
| YNL058C                                          | YNL058C       | YJR032W                 | CPR7          |
| YJL124C                                          | LSM1          | YGL163C                 | RAD54         |
| YPL105C                                          | YPL105C       | YDR153C                 | ENT5          |
| YBR194W                                          | SOY1          | YJR140C                 | HIR3          |
| YKR059W                                          | TIF1          | YDR310C                 | SUM1          |
| YNL259C                                          | ATX1          | YBL047C                 | EDE1          |
| YBL058W                                          | SHP1          | YPL037C                 | EGD1          |
| YPL037C                                          | EGD1          | YBR036C                 | CSG2          |
| YHR161C                                          | YAP1801       | YDR323C                 | PEP7          |
| YER162C                                          | RAD4          | YGR188C                 | BUB1          |
| YNL069C                                          | RPL16B        | YDR320C                 | SWA2          |
| YPL180W                                          | TCO89         | YDL006W                 | PTC1          |
| YBR200W                                          | BEM1          | YHR039C-A               | VMA10         |
| YIL076W                                          | SEC28         | YOL111C                 | MDY2          |
| YDR389W                                          | SAC7          | YPL161C                 | BEM4          |
| YHR156C                                          | LIN1          | YPL057C                 | SUR1          |



| Predictions at threshold level 0.75 continued... |               |                         |               |
|--------------------------------------------------|---------------|-------------------------|---------------|
| Gene1 of predicted pair                          |               | Gene2 of predicted pair |               |
| Systematic Name                                  | Standard Name | Systematic Name         | Standard Name |
| YIL053W                                          | RHR2          | YML115C                 | VAN1          |
| YGL087C                                          | MMS2          | YGR019W                 | UGA1          |
| YMR198W                                          | CIK1          | YGL003C                 | CDH1          |
| YAL024C                                          | LTE1          | YMR016C                 | SOK2          |
| YCL037C                                          | SRO9          | YNL127W                 | FAR11         |
| YBL058W                                          | SHP1          | YLR371W                 | ROM2          |
| YHL031C                                          | GOS1          | YCL001W                 | RER1          |
| YDR379W                                          | RGA2          | YBL047C                 | EDE1          |
| YOL043C                                          | NTG2          | YMR055C                 | BUB2          |
| YBR041W                                          | FAT1          | YMR313C                 | TGL3          |
| YIL076W                                          | SEC28         | YLR370C                 | ARC18         |
| YKL048C                                          | ELM1          | YPL137C                 | GIP3          |
| YMR004W                                          | MVP1          | YPR032W                 | SRO7          |
| YGR261C                                          | APL6          | YMR004W                 | MVP1          |
| YPL022W                                          | RAD1          | YJR035W                 | RAD26         |
| YMR243C                                          | ZRC1          | YDL047W                 | SIT4          |
| YOR043W                                          | WHI2          | YCR077C                 | PAT1          |
| YPR030W                                          | CSR2          | YFR036W                 | CDC26         |
| YKL129C                                          | MYO3          | YHR114W                 | BZZ1          |
| YOR008C                                          | SLG1          | YHR012W                 | VPS29         |
| YBR215W                                          | HPC2          | YOR043W                 | WHI2          |
| YAL024C                                          | LTE1          | YNL238W                 | KEX2          |
| YMR224C                                          | MRE11         | YNL054W                 | VAC7          |
| YMR106C                                          | YKU80         | YLR233C                 | EST1          |
| YML115C                                          | VAN1          | YBR127C                 | VMA2          |
| YDR174W                                          | HMO1          | YBR107C                 | IML3          |
| YKL135C                                          | APL2          | YOR035C                 | SHE4          |
| YBR194W                                          | SOY1          | YJR035W                 | RAD26         |
| YAL024C                                          | LTE1          | YLR337C                 | VRP1          |

| Predictions at threshold level 0.75 continued... |               |                         |               |
|--------------------------------------------------|---------------|-------------------------|---------------|
| Gene1 of predicted pair                          |               | Gene2 of predicted pair |               |
| Systematic Name                                  | Standard Name | Systematic Name         | Standard Name |
| YBR200W                                          | BEM1          | YKL048C                 | ELM1          |
| YLR381W                                          | CTF3          | YOR141C                 | ARP8          |
| YEL065W                                          | SIT1          | YKR099W                 | BAS1          |
| YNL307C                                          | MCK1          | YJR063W                 | RPA12         |
| YHR178W                                          | STB5          | YOR043W                 | WHI2          |
| YOR127W                                          | RGA1          | YMR109W                 | MYO5          |
| YPL037C                                          | EGD1          | YGR105W                 | VMA21         |
| YJL154C                                          | VPS35         | YOR023C                 | AHC1          |
| YCR039C                                          | MATALPHA2     | YCR084C                 | TUP1          |
| YMR055C                                          | BUB2          | YGL003C                 | CDH1          |
| YAL051W                                          | OAF1          | YKR001C                 | VPS1          |
| YMR273C                                          | ZDS1          | YDR440W                 | DOT1          |
| YPR036W                                          | VMA13         | YLR093C                 | NYV1          |
| YMR016C                                          | SOK2          | YHR039C-A               | VMA10         |
| YGR108W                                          | CLB1          | YBR107C                 | IML3          |
| YNL307C                                          | MCK1          | YDR261C                 | EXG2          |
| YPR018W                                          | RLF2          | YPL057C                 | SUR1          |
| YCR020C-A                                        | MAK31         | YER122C                 | GLO3          |
| YBR030W                                          | YBR030W       | YDR358W                 | GGA1          |
| YNR032W                                          | PPG1          | YNL107W                 | YAF9          |
| YMR008C                                          | PLB1          | YMR127C                 | SAS2          |
| YPL152W                                          | RRD2          | YGL252C                 | RTG2          |
| YHR171W                                          | ATG7          | YAL030W                 | SNC1          |
| YDL116W                                          | NUP84         | YPR046W                 | MCM16         |
| YKL048C                                          | ELM1          | YDR183W                 | PLP1          |
| YDR129C                                          | SAC6          | YML115C                 | VAN1          |
| YDR477W                                          | SNF1          | YDR484W                 | VPS52         |
| YFL033C                                          | RIM15         | YEL043W                 | YEL043W       |
| YGL078C                                          | DBP3          | YLR441C                 | RPS1A         |

| Predictions at threshold level 0.75 continued... |               |                         |               |
|--------------------------------------------------|---------------|-------------------------|---------------|
| Gene1 of predicted pair                          |               | Gene2 of predicted pair |               |
| Systematic Name                                  | Standard Name | Systematic Name         | Standard Name |
| YOR358W                                          | HAP5          | YIL008W                 | URM1          |
| YMR224C                                          | MRE11         | YNL325C                 | FIG4          |
| YDR146C                                          | SWI5          | YGL163C                 | RAD54         |
| YOR127W                                          | RGA1          | YDR310C                 | SUM1          |
| YJR005W                                          | APL1          | YJR035W                 | RAD26         |
| YKR001C                                          | VPS1          | YAR014C                 | BUD14         |
| YLL007C                                          | YLL007C       | YDR254W                 | CHL4          |
| YOR008C                                          | SLG1          | YLR425W                 | TUS1          |
| YIL076W                                          | SEC28         | YGL025C                 | PGD1          |
| YGR249W                                          | MGA1          | YLR320W                 | MMS22         |
| YPL129W                                          | TAF14         | YBR200W                 | BEM1          |
| YDR293C                                          | SSD1          | YBR119W                 | MUD1          |
| YGL060W                                          | YBP2          | YMR055C                 | BUB2          |
| YOR106W                                          | VAM3          | YLR093C                 | NYV1          |
| YGR209C                                          | TRX2          | YLR309C                 | IMH1          |
| YDL223C                                          | HBT1          | YLR094C                 | GIS3          |
| YIL053W                                          | RHR2          | YLR094C                 | GIS3          |
| YDR383C                                          | NKP1          | YHR115C                 | DMA1          |
| YNL288W                                          | CAF40         | YDR289C                 | RTT103        |
| YPR018W                                          | RLF2          | YBR215W                 | HPC2          |
| YFR010W                                          | UBP6          | YPL022W                 | RAD1          |
| YJR032W                                          | CPR7          | YHR114W                 | BZZ1          |
| YGR135W                                          | PRE9          | YLR371W                 | ROM2          |
| YNL087W                                          | TCB2          | YER122C                 | GLO3          |
| YLR381W                                          | CTF3          | YML016C                 | PPZ1          |
| YDR363W-A                                        | SEM1          | YEL013W                 | VAC8          |
| YLR452C                                          | SST2          | YLR320W                 | MMS22         |
| YDR443C                                          | SSN2          | YER116C                 | SLX8          |
| YMR127C                                          | SAS2          | YGL253W                 | HXK2          |

| Predictions at threshold level 0.75 continued... |               |                         |               |
|--------------------------------------------------|---------------|-------------------------|---------------|
| Gene1 of predicted pair                          |               | Gene2 of predicted pair |               |
| Systematic Name                                  | Standard Name | Systematic Name         | Standard Name |
| YNL291C                                          | MID1          | YHR012W                 | VPS29         |
| YMR026C                                          | PEX12         | YML115C                 | VAN1          |
| YMR153W                                          | NUP53         | YNL307C                 | MCK1          |
| YKL032C                                          | IXR1          | YKL048C                 | ELM1          |
| YOR101W                                          | RAS1          | YPL018W                 | CTF19         |
| YOR043W                                          | WHI2          | YDR261C                 | EXG2          |
| YBL103C                                          | RTG3          | YML071C                 | COG8          |
| YHR205W                                          | SCH9          | YLR371W                 | ROM2          |
| YOL121C                                          | RPS19A        | YJL095W                 | BCK1          |
| YNL325C                                          | FIG4          | YMR153W                 | NUP53         |
| YNL297C                                          | MON2          | YPR032W                 | SRO7          |
| YPL037C                                          | EGD1          | YGL124C                 | MON1          |
| YER110C                                          | KAP123        | YOR358W                 | HAP5          |
| YKL139W                                          | CTK1          | YER040W                 | GLN3          |
| YNL297C                                          | MON2          | YCR066W                 | RAD18         |
| YPR167C                                          | MET16         | YLR043C                 | TRX1          |
| YHR039C-A                                        | VMA10         | YNR032W                 | PPG1          |
| YEL065W                                          | SIT1          | YML115C                 | VAN1          |
| YJR024C                                          | MDE1          | YPL246C                 | RBD2          |
| YJL124C                                          | LSM1          | YOR320C                 | GNT1          |
| YOR156C                                          | NFI1          | YHR115C                 | DMA1          |
| YGL190C                                          | CDC55         | YML124C                 | TUB3          |
| YPL037C                                          | EGD1          | YML071C                 | COG8          |
| YKR020W                                          | VPS51         | YLR425W                 | TUS1          |
| YEL065W                                          | SIT1          | YGL025C                 | PGD1          |
| YPL022W                                          | RAD1          | YGL175C                 | SAE2          |
| YPL057C                                          | SUR1          | YLR452C                 | SST2          |
| YBR194W                                          | SOY1          | YGR270W                 | YTA7          |
| YPL213W                                          | LEA1          | YJR050W                 | ISY1          |

| Predictions at threshold level 0.75 continued... |               |                         |               |
|--------------------------------------------------|---------------|-------------------------|---------------|
| Gene1 of predicted pair                          |               | Gene2 of predicted pair |               |
| Systematic Name                                  | Standard Name | Systematic Name         | Standard Name |
| YBR171W                                          | SEC66         | YLR094C                 | GIS3          |
| YMR116C                                          | ASC1          | YDR207C                 | UME6          |
| YBL008W                                          | HIR1          | YPL018W                 | CTF19         |
| YOR038C                                          | HIR2          | YCR086W                 | CSM1          |
| YBL079W                                          | NUP170        | YGR059W                 | SPR3          |
| YML115C                                          | VAN1          | YML001W                 | YPT7          |
| YLR370C                                          | ARC18         | YLR180W                 | SAM1          |
| YNL236W                                          | SIN4          | YNL238W                 | KEX2          |
| YOL147C                                          | PEX11         | YDR244W                 | PEX5          |
| YFR032C-A                                        | RPL29         | YBR082C                 | UBC4          |
| YPR084W                                          | YPR084W       | YGR270W                 | YTA7          |
| YNL016W                                          | PUB1          | YDR207C                 | UME6          |
| YML038C                                          | YMD8          | YFL033C                 | RIM15         |
| YER161C                                          | SPT2          | YKL160W                 | ELF1          |
| YOR127W                                          | RGA1          | YBR107C                 | IML3          |
| YDL059C                                          | RAD59         | YPR120C                 | CLB5          |
| YLR320W                                          | MMS22         | YCR053W                 | THR4          |
| YJL172W                                          | CPS1          | YLR320W                 | MMS22         |
| YMR127C                                          | SAS2          | YOL067C                 | RTG1          |
| YJR040W                                          | GEF1          | YDL077C                 | VAM6          |
| YOR080W                                          | DIA2          | YPL022W                 | RAD1          |
| YNL291C                                          | MID1          | YIL076W                 | SEC28         |
| YDR004W                                          | RAD57         | YOR033C                 | EXO1          |
| YBR217W                                          | ATG12         | YEL060C                 | PRB1          |
| YOR270C                                          | VPH1          | YBR280C                 | SAF1          |
| YDL101C                                          | DUN1          | YGL031C                 | RPL24A        |
| YPL161C                                          | BEM4          | YJL006C                 | CTK2          |
| YHR013C                                          | ARD1          | YDR318W                 | MCM21         |
| YBL003C                                          | HTA2          | YDR254W                 | CHL4          |

| Predictions at threshold level 0.75 continued... |               |                         |               |
|--------------------------------------------------|---------------|-------------------------|---------------|
| Gene1 of predicted pair                          |               | Gene2 of predicted pair |               |
| Systematic Name                                  | Standard Name | Systematic Name         | Standard Name |
| YPL152W                                          | RRD2          | YIR005W                 | IST3          |
| YAL024C                                          | LTE1          | YDR310C                 | SUM1          |
| YLR006C                                          | SSK1          | YDR310C                 | SUM1          |
| YBL103C                                          | RTG3          | YLR320W                 | MMS22         |
| YDR378C                                          | LSM6          | YGR270W                 | YTA7          |
| YMR095C                                          | SNO1          | YMR026C                 | PEX12         |
| YGL135W                                          | RPL1B         | YKR020W                 | VPS51         |
| YML103C                                          | NUP188        | YPR046W                 | MCM16         |
| YDL006W                                          | PTC1          | YNL107W                 | YAF9          |
| YMR142C                                          | RPL13B        | YER139C                 | YER139C       |
| YOR270C                                          | VPH1          | YER122C                 | GLO3          |
| YDR245W                                          | MNN10         | YKL032C                 | IXR1          |
| YKR001C                                          | VPS1          | YLR093C                 | NYV1          |
| YIL008W                                          | URM1          | YJL095W                 | BCK1          |
| YNL238W                                          | KEX2          | YBL025W                 | RRN10         |
| YBR200W                                          | BEM1          | YGR135W                 | PRE9          |
| YHL027W                                          | RIM101        | YJR032W                 | CPR7          |
| YHR115C                                          | DMA1          | YOL081W                 | IRA2          |
| YEL056W                                          | HAT2          | YAR014C                 | BUD14         |
| YHR111W                                          | UBA4          | YHL002W                 | HSE1          |
| YPL161C                                          | BEM4          | YDL077C                 | VAM6          |
| YOR069W                                          | VPS5          | YDR080W                 | VPS41         |
| YOR127W                                          | RGA1          | YGL237C                 | HAP2          |
| YHL031C                                          | GOS1          | YNL238W                 | KEX2          |
| YLR058C                                          | SHM2          | YPR046W                 | MCM16         |
| YIL159W                                          | BNR1          | YKL048C                 | ELM1          |
| YJR090C                                          | GRR1          | YBR114W                 | RAD16         |
| YOR212W                                          | STE4          | YFL026W                 | STE2          |
| YDR293C                                          | SSD1          | YOL067C                 | RTG1          |

| Predictions at threshold level 0.75 continued... |               |                         |               |
|--------------------------------------------------|---------------|-------------------------|---------------|
| Gene1 of predicted pair                          |               | Gene2 of predicted pair |               |
| Systematic Name                                  | Standard Name | Systematic Name         | Standard Name |
| YML115C                                          | VAN1          | YJL172W                 | CPS1          |
| YLR292C                                          | SEC72         | YDR293C                 | SSD1          |
| YDL101C                                          | DUN1          | YBL019W                 | APN2          |
| YLR399C                                          | BDF1          | YLR410W                 | VIP1          |
| YLR018C                                          | POM34         | YMR125W                 | STO1          |
| YJR060W                                          | CBF1          | YDL006W                 | PTC1          |
| YPR120C                                          | CLB5          | YJR135C                 | MCM22         |
| YPL057C                                          | SUR1          | YDR469W                 | SDC1          |
| YCR066W                                          | RAD18         | YHR056C                 | RSC30         |
| YIL076W                                          | SEC28         | YDL006W                 | PTC1          |
| YMR311C                                          | GLC8          | YBR280C                 | SAF1          |
| YOR106W                                          | VAM3          | YPL037C                 | EGD1          |
| YKR020W                                          | VPS51         | YLR320W                 | MMS22         |
| YPL037C                                          | EGD1          | YPL161C                 | BEM4          |
| YDR289C                                          | RTT103        | YLR182W                 | SWI6          |
| YOL018C                                          | TLG2          | YDL077C                 | VAM6          |
| YOR195W                                          | SLK19         | YLR370C                 | ARC18         |
| YNL044W                                          | YIP3          | YKL119C                 | VPH2          |
| YIL159W                                          | BNR1          | YHR156C                 | LIN1          |
| YOL121C                                          | RPS19A        | YER139C                 | YER139C       |
| YDR477W                                          | SNF1          | YGL124C                 | MON1          |
| YDR443C                                          | SSN2          | YLR452C                 | SST2          |
| YOR290C                                          | SNF2          | YHL025W                 | SNF6          |
| YBL027W                                          | RPL19B        | YDR289C                 | RTT103        |
| YIR009W                                          | MSL1          | YMR125W                 | STO1          |
| YBR283C                                          | SSH1          | YDR310C                 | SUM1          |
| YBR126C                                          | TPS1          | YER144C                 | UBP5          |
| YDR484W                                          | VPS52         | YDL161W                 | ENT1          |
| YPL234C                                          | TFP3          | YDR207C                 | UME6          |

| Predictions at threshold level 0.75 continued... |               |                         |               |
|--------------------------------------------------|---------------|-------------------------|---------------|
| Gene1 of predicted pair                          |               | Gene2 of predicted pair |               |
| Systematic Name                                  | Standard Name | Systematic Name         | Standard Name |
| YKL101W                                          | HSL1          | YDR207C                 | UME6          |
| YPR051W                                          | MAK3          | YNL297C                 | MON2          |
| YHR134W                                          | WSS1          | YJL124C                 | LSM1          |
| YOR140W                                          | SFL1          | YOR106W                 | VAM3          |
| YNL201C                                          | PSY2          | YLR315W                 | NKP2          |
| YFL026W                                          | STE2          | YPL187W                 | MF(ALPHA)1    |
| YBL047C                                          | EDE1          | YDR310C                 | SUM1          |
| YOR358W                                          | HAP5          | YDL155W                 | CLB3          |
| YOR035C                                          | SHE4          | YEL060C                 | PRB1          |
| YCR081W                                          | SRB8          | YML115C                 | VAN1          |
| YNL291C                                          | MID1          | YLR150W                 | STM1          |
| YOR270C                                          | VPH1          | YEL060C                 | PRB1          |
| YDR443C                                          | SSN2          | YLR119W                 | SRN2          |
| YBR194W                                          | SOY1          | YBR215W                 | HPC2          |
| YJR125C                                          | ENT3          | YHR108W                 | GGA2          |
| YMR054W                                          | STV1          | YOR327C                 | SNC2          |
| YNL325C                                          | FIG4          | YLR441C                 | RPS1A         |
| YER110C                                          | KAP123        | YDR335W                 | MSN5          |
| YPL152W                                          | RRD2          | YOL054W                 | PSH1          |
| YPL253C                                          | VIK1          | YDR456W                 | NHX1          |
| YBR278W                                          | DPB3          | YOR368W                 | RAD17         |
| YBL103C                                          | RTG3          | YER162C                 | RAD4          |
| YOR132W                                          | VPS17         | YER120W                 | SCS2          |
| YPL024W                                          | RMI1          | YOL081W                 | IRA2          |
| YFR010W                                          | UBP6          | YBR019C                 | GAL10         |
| YDR318W                                          | MCM21         | YOL081W                 | IRA2          |
| YFR031C-A                                        | RPL2A         | YLR320W                 | MMS22         |
| YGR241C                                          | YAP1802       | YOR036W                 | PEP12         |
| YLR399C                                          | BDF1          | YOL081W                 | IRA2          |



| Predictions at threshold level 0.75 continued... |               |                         |               |
|--------------------------------------------------|---------------|-------------------------|---------------|
| Gene1 of predicted pair                          |               | Gene2 of predicted pair |               |
| Systematic Name                                  | Standard Name | Systematic Name         | Standard Name |
| YDL077C                                          | VAM6          | YDR310C                 | SUM1          |
| YDR076W                                          | RAD55         | YKL101W                 | HSL1          |
| YIL076W                                          | SEC28         | YCR053W                 | THR4          |
| YHR111W                                          | UBA4          | YAR014C                 | BUD14         |
| YGL078C                                          | DBP3          | YDR310C                 | SUM1          |
| YBR267W                                          | REI1          | YKR048C                 | NAP1          |
| YML115C                                          | VAN1          | YBR019C                 | GAL10         |
| YDL184C                                          | RPL41A        | YNL087W                 | TCB2          |
| YOR195W                                          | SLK19         | YPR036W                 | VMA13         |
| YDR320C                                          | SWA2          | YML071C                 | COG8          |
| YMR116C                                          | ASC1          | YDL155W                 | CLB3          |
| YOR127W                                          | RGA1          | YGL253W                 | HXK2          |
| YNL307C                                          | MCK1          | YMR152W                 | YIM1          |
| YMR231W                                          | PEP5          | YDR323C                 | PEP7          |
| YML016C                                          | PPZ1          | YJL183W                 | MNN11         |
| YHR073W                                          | OSH3          | YMR199W                 | CLN1          |
| YOL061W                                          | PRS5          | YER099C                 | PRS2          |
| YPL161C                                          | BEM4          | YFR036W                 | CDC26         |
| YOR038C                                          | HIR2          | YEL013W                 | VAC8          |
| YBR173C                                          | UMP1          | YMR284W                 | YKU70         |
| YGL147C                                          | RPL9A         | YBR173C                 | UMP1          |
| YIL162W                                          | SUC2          | YOR085W                 | OST3          |
| YCL001W                                          | RER1          | YDR207C                 | UME6          |
| YBR290W                                          | BSD2          | YDR318W                 | MCM21         |
| YOR127W                                          | RGA1          | YPR046W                 | MCM16         |
| YCR081W                                          | SRB8          | YNL236W                 | SIN4          |
| YBL103C                                          | RTG3          | YBR019C                 | GAL10         |
| YGL115W                                          | SNF4          | YDR200C                 | VPS64         |
| YMR026C                                          | PEX12         | YDR484W                 | VPS52         |

| Predictions at threshold level 0.75 continued... |               |                         |               |
|--------------------------------------------------|---------------|-------------------------|---------------|
| Gene1 of predicted pair                          |               | Gene2 of predicted pair |               |
| Systematic Name                                  | Standard Name | Systematic Name         | Standard Name |
| YNL291C                                          | MID1          | YFR036W                 | CDC26         |
| YOR076C                                          | SKI7          | YFR010W                 | UBP6          |
| YPL137C                                          | GIP3          | YPL195W                 | APL5          |
| YDL020C                                          | RPN4          | YPL253C                 | VIK1          |
| YPL213W                                          | LEA1          | YBL101C                 | ECM21         |
| YPL115C                                          | BEM3          | YNL107W                 | YAF9          |
| YJR060W                                          | CBF1          | YLR254C                 | NDL1          |
| YNL166C                                          | BNI5          | YLR447C                 | VMA6          |
| YDL077C                                          | VAM6          | YPR032W                 | SRO7          |
| YML016C                                          | PPZ1          | YLR254C                 | NDL1          |
| YER087C-B                                        | SBH1          | YMR223W                 | UBP8          |
| YGR261C                                          | APL6          | YMR216C                 | SKY1          |
| YNL079C                                          | TPM1          | YOR035C                 | SHE4          |
| YMR231W                                          | PEP5          | YJR090C                 | GRR1          |
| YHR010W                                          | RPL27A        | YLR352W                 | YLR352W       |
| YIL076W                                          | SEC28         | YPL120W                 | VPS30         |
| YNL307C                                          | MCK1          | YHR200W                 | RPN10         |
| YBR200W                                          | BEM1          | YLR093C                 | NYV1          |
| YDR137W                                          | RGP1          | YER162C                 | RAD4          |
| YDR329C                                          | PEX3          | YAL055W                 | PEX22         |
| YOR132W                                          | VPS17         | YEL053C                 | MAK10         |
| YOR127W                                          | RGA1          | YHL002W                 | HSE1          |
| YBR126C                                          | TPS1          | YML001W                 | YPT7          |
| YPL256C                                          | CLN2          | YHR010W                 | RPL27A        |
| YMR284W                                          | YKU70         | YGL163C                 | RAD54         |
| YIL053W                                          | RHR2          | YER139C                 | YER139C       |
| YMR284W                                          | YKU70         | YNR052C                 | POP2          |
| YOR112W                                          | CEX1          | YER122C                 | GLO3          |
| YJL036W                                          | SNX4          | YPR032W                 | SRO7          |

| Predictions at threshold level 0.75 continued... |               |                         |               |
|--------------------------------------------------|---------------|-------------------------|---------------|
| Gene1 of predicted pair                          |               | Gene2 of predicted pair |               |
| Systematic Name                                  | Standard Name | Systematic Name         | Standard Name |
| YGR270W                                          | YTA7          | YLR233C                 | EST1          |
| YML109W                                          | ZDS2          | YCR086W                 | CSM1          |
| YMR202W                                          | ERG2          | YPR046W                 | MCM16         |
| YMR109W                                          | MYO5          | YDR144C                 | MKC7          |
| YLR192C                                          | HCR1          | YER144C                 | UBP5          |
| YLR043C                                          | TRX1          | YLR093C                 | NYV1          |
| YMR004W                                          | MVP1          | YKL119C                 | VPH2          |
| YLR309C                                          | IMH1          | YOL108C                 | INO4          |
| YDL083C                                          | RPS16B        | YLR180W                 | SAM1          |
| YDR076W                                          | RAD55         | YJR090C                 | GRR1          |
| YML115C                                          | VAN1          | YLR370C                 | ARC18         |
| YNL041C                                          | COG6          | YDR207C                 | UME6          |
| YMR095C                                          | SNO1          | YLR093C                 | NYV1          |
| YOR069W                                          | VPS5          | YLR309C                 | IMH1          |
| YFL013C                                          | IES1          | YER139C                 | YER139C       |
| YKR020W                                          | VPS51         | YBR181C                 | RPS6B         |
| YBR200W                                          | BEM1          | YNL079C                 | TPM1          |
| YNL041C                                          | COG6          | YPL195W                 | APL5          |
| YJR032W                                          | CPR7          | YLR233C                 | EST1          |
| YML038C                                          | YMD8          | YER122C                 | GLO3          |
| YDR484W                                          | VPS52         | YPR046W                 | MCM16         |
| YBR108W                                          | YBR108W       | YBR280C                 | SAF1          |
| YOR327C                                          | SNC2          | YFL048C                 | EMP47         |
| YKL048C                                          | ELM1          | YML112W                 | CTK3          |
| YER144C                                          | UBP5          | YGL212W                 | VAM7          |
| YNL135C                                          | FPR1          | YOR208W                 | PTP2          |
| YHR178W                                          | STB5          | YJL183W                 | MNN11         |
| YFL013C                                          | IES1          | YDR440W                 | DOT1          |
| YKR020W                                          | VPS51         | YEL042W                 | GDA1          |

| Predictions at threshold level 0.75 continued... |               |                         |               |
|--------------------------------------------------|---------------|-------------------------|---------------|
| Gene1 of predicted pair                          |               | Gene2 of predicted pair |               |
| Systematic Name                                  | Standard Name | Systematic Name         | Standard Name |
| YGR072W                                          | UPF3          | YHR167W                 | THP2          |
| YBR171W                                          | SEC66         | YOR327C                 | SNC2          |
| YHR084W                                          | STE12         | YMR164C                 | MSS11         |
| YNL021W                                          | HDA1          | YPR179C                 | HDA3          |
| YMR026C                                          | PEX12         | YJL172W                 | CPS1          |
| YNL044W                                          | YIP3          | YLR447C                 | VMA6          |
| YPR017C                                          | DSS4          | YPL195W                 | APL5          |
| YMR016C                                          | SOK2          | YJL164C                 | TPK1          |
| YDL002C                                          | NHP10         | YGR270W                 | YTA7          |
| YPR051W                                          | MAK3          | YHR111W                 | UBA4          |
| YOR132W                                          | VPS17         | YJL053W                 | PEP8          |
| YKL139W                                          | CTK1          | YNL076W                 | MKS1          |
| YHR156C                                          | LIN1          | YLR386W                 | VAC14         |
| YGR135W                                          | PRE9          | YLR182W                 | SWI6          |
| YGR019W                                          | UGA1          | YDR183W                 | PLP1          |
| YIL036W                                          | CST6          | YMR089C                 | YTA12         |
| YDR440W                                          | DOT1          | YER122C                 | GLO3          |
| YDR225W                                          | HTA1          | YGR184C                 | UBR1          |
| YDL020C                                          | RPN4          | YDR183W                 | PLP1          |
| YHR134W                                          | WSS1          | YJR140C                 | HIR3          |
| YLR102C                                          | APC9          | YML095C                 | RAD10         |
| YBR108W                                          | YBR108W       | YFR036W                 | CDC26         |
| YIL132C                                          | CSM2          | YLR376C                 | PSY3          |
| YGL163C                                          | RAD54         | YKL101W                 | HSL1          |
| YOR270C                                          | VPH1          | YJL183W                 | MNN11         |
| YBR200W                                          | BEM1          | YBR280C                 | SAF1          |
| YGL190C                                          | CDC55         | YPL269W                 | KAR9          |
| YMR026C                                          | PEX12         | YER139C                 | YER139C       |
| YEL051W                                          | VMA8          | YNR032W                 | PPG1          |

| Predictions at threshold level 0.75 continued... |               |                         |               |
|--------------------------------------------------|---------------|-------------------------|---------------|
| Gene1 of predicted pair                          |               | Gene2 of predicted pair |               |
| Systematic Name                                  | Standard Name | Systematic Name         | Standard Name |
| YER144C                                          | UBP5          | YLR370C                 | ARC18         |
| YNL297C                                          | MON2          | YCR086W                 | CSM1          |
| YGL133W                                          | ITC1          | YOR304W                 | ISW2          |
| YPL024W                                          | RMI1          | YNL106C                 | INP52         |
| YDR318W                                          | MCM21         | YJL183W                 | MNN11         |
| YJR032W                                          | CPR7          | YJR090C                 | GRR1          |
| YCR020C-A                                        | MAK31         | YGR105W                 | VMA21         |
| YLR288C                                          | MEC3          | YFL023W                 | BUD27         |
| YJR135C                                          | MCM22         | YLR233C                 | EST1          |
| YJL004C                                          | SYS1          | YDR153C                 | ENT5          |
| YDL002C                                          | NHP10         | YOR368W                 | RAD17         |
| YLR192C                                          | HCR1          | YLR320W                 | MMS22         |
| YKL126W                                          | YPK1          | YGL124C                 | MON1          |
| YNR072W                                          | HXT17         | YOR066W                 | MSA1          |
| YBR057C                                          | MUM2          | YDL013W                 | SLX5          |
| YLR320W                                          | MMS22         | YPR046W                 | MCM16         |
| YDR137W                                          | RGP1          | YDR289C                 | RTT103        |
| YMR095C                                          | SNO1          | YMR096W                 | SNZ1          |
| YMR179W                                          | SPT21         | YOL091W                 | SPO21         |
| YGL237C                                          | HAP2          | YJL183W                 | MNN11         |
| YML095C                                          | RAD10         | YGL003C                 | CDH1          |
| YDR383C                                          | NKP1          | YML016C                 | PPZ1          |
| YML001W                                          | YPT7          | YDL083C                 | RPS16B        |
| YEL043W                                          | YEL043W       | YJR060W                 | CBF1          |
| YDR318W                                          | MCM21         | YLR032W                 | RAD5          |
| YIL053W                                          | RHR2          | YBR171W                 | SEC66         |
| YMR142C                                          | RPL13B        | YOR290C                 | SNF2          |
| YEL065W                                          | SIT1          | YDR310C                 | SUM1          |
| YLR018C                                          | POM34         | YGL163C                 | RAD54         |

| Predictions at threshold level 0.75 continued... |               |                         |               |
|--------------------------------------------------|---------------|-------------------------|---------------|
| Gene1 of predicted pair                          |               | Gene2 of predicted pair |               |
| Systematic Name                                  | Standard Name | Systematic Name         | Standard Name |
| YML109W                                          | ZDS2          | YBR009C                 | HHF1          |
| YHL031C                                          | GOS1          | YKL119C                 | VPH2          |
| YDR484W                                          | VPS52         | YER040W                 | GLN3          |
| YPR046W                                          | MCM16         | YDR289C                 | RTT103        |
| YMR095C                                          | SNO1          | YPR036W                 | VMA13         |
| YFR010W                                          | UBP6          | YHR167W                 | THP2          |
| YKL116C                                          | PRR1          | YMR214W                 | SCJ1          |
| YHR039C-A                                        | VMA10         | YDL077C                 | VAM6          |
| YFR031C-A                                        | RPL2A         | YJL036W                 | SNX4          |
| YDR440W                                          | DOT1          | YJL095W                 | BCK1          |
| YMR095C                                          | SNO1          | YER162C                 | RAD4          |
| YML115C                                          | VAN1          | YJL183W                 | MNN11         |
| YDR192C                                          | NUP42         | YOR185C                 | GSP2          |
| YOR332W                                          | VMA4          | YGR020C                 | VMA7          |
| YPR046W                                          | MCM16         | YBL025W                 | RRN10         |
| YJR060W                                          | CBF1          | YDR153C                 | ENT5          |
| YKL025C                                          | PAN3          | YDR289C                 | RTT103        |
| YML115C                                          | VAN1          | YBR274W                 | CHK1          |
| YPR029C                                          | APL4          | YOR035C                 | SHE4          |
| YIL053W                                          | RHR2          | YOL111C                 | MDY2          |
| YMR224C                                          | MRE11         | YDR335W                 | MSN5          |
| YDL101C                                          | DUN1          | YMR038C                 | CCS1          |
| YGR020C                                          | VMA7          | YJL183W                 | MNN11         |
| YOR138C                                          | RUP1          | YOR124C                 | UBP2          |
| YLR058C                                          | SHM2          | YBR215W                 | HPC2          |
| YGR270W                                          | YTA7          | YDR318W                 | MCM21         |
| YDR225W                                          | HTA1          | YBR173C                 | UMP1          |
| YAL024C                                          | LTE1          | YOL121C                 | RPS19A        |
| YPL001W                                          | HAT1          | YGR252W                 | GCN5          |

| Predictions at threshold level 0.75 continued... |               |                         |               |
|--------------------------------------------------|---------------|-------------------------|---------------|
| Gene1 of predicted pair                          |               | Gene2 of predicted pair |               |
| Systematic Name                                  | Standard Name | Systematic Name         | Standard Name |
| YLR079W                                          | SIC1          | YOR106W                 | VAM3          |
| YER161C                                          | SPT2          | YKL213C                 | DOA1          |
| YMR142C                                          | RPL13B        | YDL223C                 | HBT1          |
| YER116C                                          | SLX8          | YJR032W                 | CPR7          |
| YDR484W                                          | VPS52         | YBR127C                 | VMA2          |
| YKL048C                                          | ELM1          | YKL110C                 | KTI12         |
| YNL106C                                          | INP52         | YGL124C                 | MON1          |
| YNR023W                                          | SNF12         | YBR289W                 | SNF5          |
| YHR111W                                          | UBA4          | YJL095W                 | BCK1          |
| YMR095C                                          | SNO1          | YML001W                 | YPT7          |
| YOR033C                                          | EXO1          | YDL101C                 | DUN1          |
| YBR065C                                          | ECM2          | YIR009W                 | MSL1          |
| YBL051C                                          | PIN4          | YLR425W                 | TUS1          |
| YOR368W                                          | RAD17         | YDR310C                 | SUM1          |
| YLR080W                                          | EMP46         | YEL036C                 | ANP1          |
| YIL076W                                          | SEC28         | YPL195W                 | APL5          |
| YIL036W                                          | CST6          | YNL054W                 | VAC7          |
| YDR440W                                          | DOT1          | YMR089C                 | YTA12         |
| YFR031C-A                                        | RPL2A         | YLR309C                 | IMH1          |
| YMR199W                                          | CLN1          | YDR456W                 | NHX1          |
| YLR386W                                          | VAC14         | YEL053C                 | MAK10         |
| YEL065W                                          | SIT1          | YKL160W                 | ELF1          |
| YGL121C                                          | GPG1          | YJL106W                 | IME2          |
| YKR072C                                          | SIS2          | YBR215W                 | HPC2          |
| YPR052C                                          | NHP6A         | YDR176W                 | NGG1          |
| YFR031C-A                                        | RPL2A         | YDR293C                 | SSD1          |
| YBL016W                                          | FUS3          | YDL159W                 | STE7          |
| YBR108W                                          | YBR108W       | YAL002W                 | VPS8          |
| YCR020C-A                                        | MAK31         | YDR153C                 | ENT5          |

| Predictions at threshold level 0.75 continued... |               |                         |               |
|--------------------------------------------------|---------------|-------------------------|---------------|
| Gene1 of predicted pair                          |               | Gene2 of predicted pair |               |
| Systematic Name                                  | Standard Name | Systematic Name         | Standard Name |
| YML095C                                          | RAD10         | YGL253W                 | HXK2          |
| YLR216C                                          | CPR6          | YGR188C                 | BUB1          |
| YKR101W                                          | SIR1          | YCL027W                 | FUS1          |
| YKL139W                                          | CTK1          | YML071C                 | COG8          |
| YMR026C                                          | PEX12         | YPR036W                 | VMA13         |
| YBL047C                                          | EDE1          | YML097C                 | VPS9          |
| YNL206C                                          | RTT106        | YPL256C                 | CLN2          |
| YLR234W                                          | TOP3          | YBR274W                 | CHK1          |
| YKL139W                                          | CTK1          | YDR335W                 | MSN5          |
| YIL053W                                          | RHR2          | YKL116C                 | PRR1          |
| YBR171W                                          | SEC66         | YHR060W                 | VMA22         |
| YHR134W                                          | WSS1          | YLR313C                 | SPH1          |
| YDL116W                                          | NUP84         | YDR004W                 | RAD57         |
| YLR176C                                          | RFX1          | YCR084C                 | TUP1          |
| YGL133W                                          | ITC1          | YKL032C                 | IXR1          |
| YDR103W                                          | STE5          | YBR200W                 | BEM1          |
| YIL076W                                          | SEC28         | YNL051W                 | COG5          |
| YFR031C-A                                        | RPL2A         | YGL025C                 | PGD1          |
| YJR060W                                          | CBF1          | YDL155W                 | CLB3          |
| YDR174W                                          | HMO1          | YDL013W                 | SLX5          |
| YNL032W                                          | SIW14         | YBR280C                 | SAF1          |
| YDR129C                                          | SAC6          | YDL223C                 | HBT1          |
| YLR102C                                          | APC9          | YOR127W                 | RGA1          |
| YMR095C                                          | SNO1          | YHR039C-A               | VMA10         |
| YKL116C                                          | PRR1          | YOR270C                 | VPH1          |
| YGR261C                                          | APL6          | YPL234C                 | TFP3          |
| YDR192C                                          | NUP42         | YLR234W                 | TOP3          |
| YGL087C                                          | MMS2          | YOR358W                 | HAP5          |
| YOR195W                                          | SLK19         | YDL155W                 | CLB3          |



| Predictions at threshold level 0.75 continued... |               |                         |               |
|--------------------------------------------------|---------------|-------------------------|---------------|
| Gene1 of predicted pair                          |               | Gene2 of predicted pair |               |
| Systematic Name                                  | Standard Name | Systematic Name         | Standard Name |
| YNL215W                                          | IES2          | YEL013W                 | VAC8          |
| YDL180W                                          | YDL180W       | YDL186W                 | YDL186W       |
| YPL049C                                          | DIG1          | YGR040W                 | KSS1          |
| YAL024C                                          | LTE1          | YIR009W                 | MSL1          |
| YIL159W                                          | BNR1          | YKR035W-A               | DID2          |
| YKL139W                                          | CTK1          | YKR020W                 | VPS51         |
| YKL126W                                          | YPK1          | YPL037C                 | EGD1          |
| YDR383C                                          | NKP1          | YLR399C                 | BDF1          |
| YBL103C                                          | RTG3          | YMR230W                 | RPS10B        |
| YGL147C                                          | RPL9A         | YKL139W                 | CTK1          |
| YBR194W                                          | SOY1          | YLR182W                 | SWI6          |
| YLR090W                                          | XDJ1          | YDR207C                 | UME6          |
| YBL088C                                          | TEL1          | YER068W                 | MOT2          |
| YMR095C                                          | SNO1          | YMR224C                 | MRE11         |
| YPR018W                                          | RLF2          | YKR072C                 | SIS2          |
| YJL172W                                          | CPS1          | YDR207C                 | UME6          |
| YDR264C                                          | AKR1          | YGR135W                 | PRE9          |
| YOR033C                                          | EXO1          | YDL059C                 | RAD59         |
| YDR254W                                          | CHL4          | YNL116W                 | DMA2          |
| YNL087W                                          | TCB2          | YGL212W                 | VAM7          |
| YMR026C                                          | PEX12         | YDL077C                 | VAM6          |
| YLR452C                                          | SST2          | YDL047W                 | SIT4          |
| YPL105C                                          | YPL105C       | YER120W                 | SCS2          |
| YDR144C                                          | MKC7          | YCR086W                 | CSM1          |
| YOR337W                                          | TEA1          | YIL076W                 | SEC28         |
| YFR010W                                          | UBP6          | YHR081W                 | LRP1          |
| YBL102W                                          | SFT2          | YOR132W                 | VPS17         |
| YPR084W                                          | YPR084W       | YOR109W                 | INP53         |
| YIL159W                                          | BNR1          | YNL116W                 | DMA2          |

| Predictions at threshold level 0.75 continued... |               |                         |               |
|--------------------------------------------------|---------------|-------------------------|---------------|
| Gene1 of predicted pair                          |               | Gene2 of predicted pair |               |
| Systematic Name                                  | Standard Name | Systematic Name         | Standard Name |
| YNR072W                                          | HXT17         | YEL060C                 | PRB1          |
| YJL172W                                          | CPS1          | YOR043W                 | WHI2          |
| YPR119W                                          | CLB2          | YDR131C                 | YDR131C       |
| YLR095C                                          | IOC2          | YLR398C                 | SKI2          |
| YDR137W                                          | RGP1          | YDR358W                 | GGA1          |
| YHR152W                                          | SPO12         | YKL101W                 | HSL1          |
| YBR200W                                          | BEM1          | YMR055C                 | BUB2          |
| YJL124C                                          | LSM1          | YKL032C                 | IXR1          |
| YFR031C-A                                        | RPL2A         | YDR310C                 | SUM1          |
| YCR020C-A                                        | MAK31         | YNR032W                 | PPG1          |
| YLR135W                                          | SLX4          | YJR035W                 | RAD26         |
| YAL024C                                          | LTE1          | YER122C                 | GLO3          |
| YPL042C                                          | SSN3          | YAL002W                 | VPS8          |
| YPR018W                                          | RLF2          | YOR368W                 | RAD17         |
| YOR059C                                          | YOR059C       | YMR152W                 | YIM1          |
| YHR060W                                          | VMA22         | YJR032W                 | CPR7          |
| YNL291C                                          | MID1          | YCL001W                 | RER1          |
| YJR060W                                          | CBF1          | YNL041C                 | COG6          |
| YHR206W                                          | SKN7          | YDL056W                 | MBP1          |
| YJL154C                                          | VPS35         | YNR032W                 | PPG1          |
| YGR020C                                          | VMA7          | YKR020W                 | VPS51         |
| YGL115W                                          | SNF4          | YDR207C                 | UME6          |
| YBR200W                                          | BEM1          | YER144C                 | UBP5          |
| YPR046W                                          | MCM16         | YLR182W                 | SWI6          |
| YNL307C                                          | MCK1          | YLR093C                 | NYV1          |
| YDR378C                                          | LSM6          | YOR141C                 | ARP8          |
| YDR443C                                          | SSN2          | YBL103C                 | RTG3          |
| YHR195W                                          | NVJ1          | YPR185W                 | ATG13         |
| YNL264C                                          | PDR17         | YDL005C                 | MED2          |

| Predictions at threshold level 0.75 continued... |               |                         |               |
|--------------------------------------------------|---------------|-------------------------|---------------|
| Gene1 of predicted pair                          |               | Gene2 of predicted pair |               |
| Systematic Name                                  | Standard Name | Systematic Name         | Standard Name |
| YPL253C                                          | VIK1          | YMR311C                 | GLC8          |
| YBR108W                                          | YBR108W       | YHR060W                 | VMA22         |
| YLR360W                                          | VPS38         | YDR202C                 | RAV2          |
| YNL078W                                          | NIS1          | YKL101W                 | HSL1          |
| YNL215W                                          | IES2          | YMR038C                 | CCS1          |
| YLR079W                                          | SIC1          | YDR207C                 | UME6          |
| YML016C                                          | PPZ1          | YNL248C                 | RPA49         |
| YHR052W                                          | CIC1          | YJL047C                 | RTT101        |
| YEL050C                                          | RML2          | YNL236W                 | SIN4          |
| YOR212W                                          | STE4          | YJL157C                 | FAR1          |
| YBR194W                                          | SOY1          | YCL037C                 | SRO9          |
| YGR019W                                          | UGA1          | YDR144C                 | MKC7          |
| YDR293C                                          | SSD1          | YOR112W                 | CEX1          |
| YLR386W                                          | VAC14         | YHR200W                 | RPN10         |
| YHR012W                                          | VPS29         | YGR105W                 | VMA21         |
| YLR398C                                          | SKI2          | YER122C                 | GLO3          |
| YJL136C                                          | RPS21B        | YKL101W                 | HSL1          |
| YEL053C                                          | MAK10         | YML001W                 | YPT7          |
| YKL110C                                          | KTI12         | YNL107W                 | YAF9          |
| YGR104C                                          | SRB5          | YOL018C                 | TLG2          |
| YBR200W                                          | BEM1          | YKR057W                 | RPS21A        |
| YKL139W                                          | CTK1          | YGR270W                 | YTA7          |
| YLR360W                                          | VPS38         | YLR447C                 | VMA6          |
| YDL006W                                          | PTC1          | YGL019W                 | CKB1          |
| YMR205C                                          | PFK2          | YHR200W                 | RPN10         |
| YPR173C                                          | VPS4          | YGL124C                 | MON1          |
| YMR198W                                          | CIK1          | YDR289C                 | RTT103        |
| YNL209W                                          | SSB2          | YDR028C                 | REG1          |
| YMR153W                                          | NUP53         | YMR214W                 | SCJ1          |

| Predictions at threshold level 0.75 continued... |               |                         |               |
|--------------------------------------------------|---------------|-------------------------|---------------|
| Gene1 of predicted pair                          |               | Gene2 of predicted pair |               |
| Systematic Name                                  | Standard Name | Systematic Name         | Standard Name |
| YDR176W                                          | NGG1          | YDR216W                 | ADR1          |
| YGL223C                                          | COG1          | YHR039C-A               | VMA10         |
| YPL037C                                          | EGD1          | YGL115W                 | SNF4          |
| YGR249W                                          | MGA1          | YDR484W                 | VPS52         |
| YLR090W                                          | XDJ1          | YDL077C                 | VAM6          |
| YAL024C                                          | LTE1          | YJR032W                 | CPR7          |
| YJL127C                                          | SPT10         | YGL115W                 | SNF4          |
| YFR036W                                          | CDC26         | YEL036C                 | ANP1          |
| YLR337C                                          | VRP1          | YKL041W                 | VPS24         |
| YHR060W                                          | VMA22         | YDR310C                 | SUM1          |
| YAL024C                                          | LTE1          | YGR238C                 | KEL2          |
| YEL060C                                          | PRB1          | YOL081W                 | IRA2          |
| YBL079W                                          | NUP170        | YCR086W                 | CSM1          |
| YKL135C                                          | APL2          | YOR109W                 | INP53         |
| YNL206C                                          | RTT106        | YBL087C                 | RPL23A        |
| YDR171W                                          | HSP42         | YNL107W                 | YAF9          |
| YMR091C                                          | NPL6          | YCR020W-B               | HTL1          |
| YBL102W                                          | SFT2          | YJR033C                 | RAV1          |
| YER116C                                          | SLX8          | YDL077C                 | VAM6          |
| YGL147C                                          | RPL9A         | YER144C                 | UBP5          |
| YKL007W                                          | CAP1          | YDR245W                 | MNN10         |
| YML103C                                          | NUP188        | YKR061W                 | KTR2          |
| YDL184C                                          | RPL41A        | YOR066W                 | MSA1          |
| YEL056W                                          | HAT2          | YBR114W                 | RAD16         |
| YJR135C                                          | MCM22         | YOL081W                 | IRA2          |
| YGL147C                                          | RPL9A         | YLR441C                 | RPS1A         |
| YPL234C                                          | TFP3          | YHR012W                 | VPS29         |
| YBR108W                                          | YBR108W       | YGL003C                 | CDH1          |
| YJL080C                                          | SCP160        | YFL026W                 | STE2          |

| Predictions at threshold level 0.75 continued... |               |                         |               |
|--------------------------------------------------|---------------|-------------------------|---------------|
| Gene1 of predicted pair                          |               | Gene2 of predicted pair |               |
| Systematic Name                                  | Standard Name | Systematic Name         | Standard Name |
| YIL034C                                          | CAP2          | YGR080W                 | TWF1          |
| YFR032C-A                                        | RPL29         | YBR200W                 | BEM1          |
| YBL051C                                          | PIN4          | YDR318W                 | MCM21         |
| YJL197W                                          | UBP12         | YFL026W                 | STE2          |
| YGR241C                                          | YAP1802       | YJL053W                 | PEP8          |
| YLR192C                                          | HCR1          | YKR099W                 | BAS1          |
| YDL116W                                          | NUP84         | YJR024C                 | MDE1          |
| YDR254W                                          | CHL4          | YDR155C                 | CPR1          |
| YJR063W                                          | RPA12         | YGL163C                 | RAD54         |
| YER129W                                          | SAK1          | YJL187C                 | SWE1          |
| YLR079W                                          | SIC1          | YLR429W                 | CRN1          |
| YOL051W                                          | GAL11         | YKR048C                 | NAP1          |
| YGL163C                                          | RAD54         | YLR032W                 | RAD5          |
| YNL201C                                          | PSY2          | YLR182W                 | SWI6          |
| YGL174W                                          | BUD13         | YJR135C                 | MCM22         |
| YBL058W                                          | SHP1          | YMR230W                 | RPS10B        |
| YMR172W                                          | HOT1          | YEL056W                 | HAT2          |
| YLR313C                                          | SPH1          | YDR207C                 | UME6          |
| YBR194W                                          | SOY1          | YGL200C                 | EMP24         |
| YMR055C                                          | BUB2          | YNL236W                 | SIN4          |
| YGL134W                                          | PCL10         | YPL031C                 | PHO85         |
| YJR032W                                          | CPR7          | YGL124C                 | MON1          |
| YNL032W                                          | SIW14         | YJL095W                 | BCK1          |
| YGR229C                                          | SMI1          | YHR205W                 | SCH9          |
| YNL264C                                          | PDR17         | YBL078C                 | ATG8          |
| YNL106C                                          | INP52         | YKR061W                 | KTR2          |
| YBL008W                                          | HIR1          | YLR435W                 | TSR2          |
| YOR023C                                          | AHC1          | YGR270W                 | YTA7          |
| YPR084W                                          | YPR084W       | YNL127W                 | FAR11         |

| Predictions at threshold level 0.75 continued... |               |                         |               |
|--------------------------------------------------|---------------|-------------------------|---------------|
| Gene1 of predicted pair                          |               | Gene2 of predicted pair |               |
| Systematic Name                                  | Standard Name | Systematic Name         | Standard Name |
| YDR176W                                          | NGG1          | YGL025C                 | PGD1          |
| YKL160W                                          | ELF1          | YEL013W                 | VAC8          |
| YOR290C                                          | SNF2          | YMR038C                 | CCS1          |
| YEL053C                                          | MAK10         | YHL002W                 | HSE1          |
| YBR173C                                          | UMP1          | YML001W                 | YPT7          |
| YPL152W                                          | RRD2          | YGR188C                 | BUB1          |
| YEL053C                                          | MAK10         | YBL025W                 | RRN10         |
| YLR399C                                          | BDF1          | YGL252C                 | RTG2          |
| YBL008W                                          | HIR1          | YPR119W                 | CLB2          |
| YNL054W                                          | VAC7          | YLR399C                 | BDF1          |
| YCL067C                                          | HMLALPHA2     | YNL330C                 | RPD3          |
| YGR020C                                          | VMA7          | YNL041C                 | COG6          |
| YEL051W                                          | VMA8          | YDR207C                 | UME6          |
| YIL036W                                          | CST6          | YML016C                 | PPZ1          |
| YOR039W                                          | CKB2          | YBR274W                 | CHK1          |
| YPL253C                                          | VIK1          | YFR036W                 | CDC26         |
| YOR008C                                          | SLG1          | YNL199C                 | GCR2          |
| YOR080W                                          | DIA2          | YER161C                 | SPT2          |
| YPL234C                                          | TFP3          | YJR032W                 | CPR7          |
| YPR018W                                          | RLF2          | YNL206C                 | RTT106        |
| YBR108W                                          | YBR108W       | YGL025C                 | PGD1          |
| YPR052C                                          | NHP6A         | YJR140C                 | HIR3          |
| YDR183W                                          | PLP1          | YEL056W                 | HAT2          |
| YGL151W                                          | NUT1          | YJL190C                 | RPS22A        |
| YOR035C                                          | SHE4          | YDL226C                 | GCS1          |
| YDR310C                                          | SUM1          | YMR214W                 | SCJ1          |
| YKL116C                                          | PRR1          | YPL195W                 | APL5          |
| YGR261C                                          | APL6          | YJR060W                 | CBF1          |
| YMR054W                                          | STV1          | YLR309C                 | IMH1          |

| Predictions at threshold level 0.75 continued... |               |                         |               |
|--------------------------------------------------|---------------|-------------------------|---------------|
| Gene1 of predicted pair                          |               | Gene2 of predicted pair |               |
| Systematic Name                                  | Standard Name | Systematic Name         | Standard Name |
| YLR288C                                          | MEC3          | YLR352W                 | YLR352W       |
| YHR013C                                          | ARD1          | YNL225C                 | CNM67         |
| YDR080W                                          | VPS41         | YHL020C                 | OPI1          |
| YLR176C                                          | RFX1          | YGL025C                 | PGD1          |
| YDR176W                                          | NGG1          | YPR072W                 | NOT5          |
| YGL078C                                          | DBP3          | YHR081W                 | LRP1          |
| YGL212W                                          | VAM7          | YDR358W                 | GGA1          |
| YDR156W                                          | RPA14         | YBR041W                 | FAT1          |
| YDR137W                                          | RGP1          | YLR320W                 | MMS22         |
| YER087C-B                                        | SBH1          | YDL074C                 | BRE1          |
| YER110C                                          | KAP123        | YNL030W                 | HHF2          |
| YGR261C                                          | APL6          | YPL161C                 | BEM4          |
| YNL230C                                          | ELA1          | YOR028C                 | CIN5          |
| YFR010W                                          | UBP6          | YDR260C                 | SWM1          |
| YGR070W                                          | ROM1          | YJL095W                 | BCK1          |
| YOR337W                                          | TEA1          | YBL058W                 | SHP1          |
| YML071C                                          | COG8          | YJR033C                 | RAV1          |
| YLR119W                                          | SRN2          | YPR173C                 | VPS4          |
| YMR091C                                          | NPL6          | YPL106C                 | SSE1          |
| YOR080W                                          | DIA2          | YMR055C                 | BUB2          |
| YPL115C                                          | BEM3          | YML109W                 | ZDS2          |
| YGL147C                                          | RPL9A         | YMR026C                 | PEX12         |
| YJL172W                                          | CPS1          | YLR371W                 | ROM2          |
| YPR051W                                          | MAK3          | YEL051W                 | VMA8          |
| YBL008W                                          | HIR1          | YDL155W                 | CLB3          |
| YNR072W                                          | HXT17         | YML001W                 | YPT7          |
| YML016C                                          | PPZ1          | YLR452C                 | SST2          |
| YDR443C                                          | SSN2          | YHR060W                 | VMA22         |
| YJR060W                                          | CBF1          | YKR030W                 | GMH1          |

| Predictions at threshold level 0.75 continued... |               |                         |               |
|--------------------------------------------------|---------------|-------------------------|---------------|
| Gene1 of predicted pair                          |               | Gene2 of predicted pair |               |
| Systematic Name                                  | Standard Name | Systematic Name         | Standard Name |
| YHL020C                                          | OPI1          | YAR014C                 | BUD14         |
| YBL103C                                          | RTG3          | YLR441C                 | RPS1A         |
| YHR156C                                          | LIN1          | YDR477W                 | SNF1          |
| YOR337W                                          | TEA1          | YDL077C                 | VAM6          |
| YMR142C                                          | RPL13B        | YCR053W                 | THR4          |
| YOR195W                                          | SLK19         | YLR150W                 | STM1          |
| YKL160W                                          | ELF1          | YDR440W                 | DOT1          |
| YDL083C                                          | RPS16B        | YBL025W                 | RRN10         |
| YNL044W                                          | YIP3          | YKR001C                 | VPS1          |
| YKL048C                                          | ELM1          | YER068W                 | MOT2          |
| YDR383C                                          | NKP1          | YML112W                 | CTK3          |
| YGL147C                                          | RPL9A         | YKR035W-A               | DID2          |
| YML016C                                          | PPZ1          | YPR046W                 | MCM16         |
| YMR109W                                          | MYO5          | YJR032W                 | CPR7          |
| YHR012W                                          | VPS29         | YDL192W                 | ARF1          |
| YGL212W                                          | VAM7          | YOL081W                 | IRA2          |
| YPR030W                                          | CSR2          | YMR214W                 | SCJ1          |
| YPR052C                                          | NHP6A         | YOL145C                 | CTR9          |
| YMR205C                                          | PFK2          | YKL048C                 | ELM1          |
| YGL003C                                          | CDH1          | YDL077C                 | VAM6          |
| YER114C                                          | BOI2          | YLR362W                 | STE11         |
| YLR371W                                          | ROM2          | YOR035C                 | SHE4          |
| YOR043W                                          | WHI2          | YER162C                 | RAD4          |
| YBR065C                                          | ECM2          | YGL174W                 | BUD13         |
| YOR033C                                          | EXO1          | YNL291C                 | MID1          |
| YER143W                                          | DDI1          | YAL030W                 | SNC1          |
| YNL307C                                          | MCK1          | YDR076W                 | RAD55         |
| YDL223C                                          | HBT1          | YKR020W                 | VPS51         |
| YNL215W                                          | IES2          | YLR381W                 | CTF3          |



| Predictions at threshold level 0.75 continued... |               |                         |               |
|--------------------------------------------------|---------------|-------------------------|---------------|
| Gene1 of predicted pair                          |               | Gene2 of predicted pair |               |
| Systematic Name                                  | Standard Name | Systematic Name         | Standard Name |
| YJL095W                                          | BCK1          | YOR141C                 | ARP8          |
| YDL116W                                          | NUP84         | YKL068W                 | NUP100        |
| YGL054C                                          | ERV14         | YPL195W                 | APL5          |
| YLR090W                                          | XDJ1          | YEL065W                 | SIT1          |
| YGL212W                                          | VAM7          | YOR035C                 | SHE4          |
| YDR448W                                          | ADA2          | YNL236W                 | SIN4          |
| YPR051W                                          | MAK3          | YOR327C                 | SNC2          |
| YBR200W                                          | BEM1          | YLR182W                 | SWI6          |
| YMR172W                                          | HOT1          | YDR289C                 | RTT103        |
| YBL058W                                          | SHP1          | YMR214W                 | SCJ1          |
| YER044C                                          | ERG28         | YDR207C                 | UME6          |
| YKL139W                                          | CTK1          | YBR108W                 | YBR108W       |
| YAL024C                                          | LTE1          | YLR370C                 | ARC18         |
| YNL248C                                          | RPA49         | YLR315W                 | NKP2          |
| YPL024W                                          | RMI1          | YGL212W                 | VAM7          |
| YLR360W                                          | VPS38         | YLR386W                 | VAC14         |
| YBR171W                                          | SEC66         | YOR275C                 | RIM20         |
| YBL008W                                          | HIR1          | YLR381W                 | CTF3          |
| YMR016C                                          | SOK2          | YOR035C                 | SHE4          |
| YOR312C                                          | RPL20B        | YJL095W                 | BCK1          |
| YOR270C                                          | VPH1          | YDL083C                 | RPS16B        |
| YBR107C                                          | IML3          | YJR035W                 | RAD26         |
| YBR173C                                          | UMP1          | YNR072W                 | HXT17         |
| YGL033W                                          | HOP2          | YMR142C                 | RPL13B        |
| YCR063W                                          | BUD31         | YDR163W                 | CWC15         |
| YGR188C                                          | BUB1          | YLR182W                 | SWI6          |
| YHR098C                                          | SFB3          | YLR085C                 | ARP6          |
| YDL059C                                          | RAD59         | YKL068W                 | NUP100        |
| YBL025W                                          | RRN10         | YMR214W                 | SCJ1          |

| Predictions at threshold level 0.75 continued... |               |                         |               |
|--------------------------------------------------|---------------|-------------------------|---------------|
| Gene1 of predicted pair                          |               | Gene2 of predicted pair |               |
| Systematic Name                                  | Standard Name | Systematic Name         | Standard Name |
| YGR071C                                          | YGR071C       | YOR308C                 | SNU66         |
| YDL185W                                          | TFP1          | YHR039C-A               | VMA10         |
| YOR066W                                          | MSA1          | YLR180W                 | SAM1          |
| YNL106C                                          | INP52         | YBR107C                 | IML3          |
| YGL078C                                          | DBP3          | YHR156C                 | LIN1          |
| YBL008W                                          | HIR1          | YDR289C                 | RTT103        |
| YGR072W                                          | UPF3          | YKR020W                 | VPS51         |
| YHR111W                                          | UBA4          | YLR425W                 | TUS1          |
| YBR239C                                          | YBR239C       | YLR064W                 | YLR064W       |
| YLR079W                                          | SIC1          | YNL236W                 | SIN4          |
| YGR020C                                          | VMA7          | YCR066W                 | RAD18         |
| YBR173C                                          | UMP1          | YKL114C                 | APN1          |
| YGL151W                                          | NUT1          | YJL095W                 | BCK1          |
| YGL163C                                          | RAD54         | YML028W                 | TSA1          |
| YLR094C                                          | GIS3          | YLR180W                 | SAM1          |
| YLR447C                                          | VMA6          | YDL185W                 | TFP1          |
| YDR443C                                          | SSN2          | YBR200W                 | BEM1          |
| YNL032W                                          | SIW14         | YOR035C                 | SHE4          |
| YKR061W                                          | KTR2          | YAL010C                 | MDM10         |
| YLR094C                                          | GIS3          | YEL060C                 | PRB1          |
| YDR443C                                          | SSN2          | YOL121C                 | RPS19A        |
| YHR205W                                          | SCH9          | YDL074C                 | BRE1          |
| YOR035C                                          | SHE4          | YEL036C                 | ANP1          |
| YKL101W                                          | HSL1          | YML028W                 | TSA1          |
| YBR194W                                          | SOY1          | YOR195W                 | SLK19         |
| YKL006W                                          | RPL14A        | YLR370C                 | ARC18         |
| YDR260C                                          | SWM1          | YAR014C                 | BUD14         |
| YFR010W                                          | UBP6          | YDL013W                 | SLX5          |
| YLR234W                                          | TOP3          | YMR284W                 | YKU70         |

| Predictions at threshold level 0.75 continued... |               |                         |               |
|--------------------------------------------------|---------------|-------------------------|---------------|
| Gene1 of predicted pair                          |               | Gene2 of predicted pair |               |
| Systematic Name                                  | Standard Name | Systematic Name         | Standard Name |
| YDR422C                                          | SIP1          | YJL187C                 | SWE1          |
| YLR399C                                          | BDF1          | YNL030W                 | HHF2          |
| YLR095C                                          | IOC2          | YPR046W                 | MCM16         |
| YOR127W                                          | RGA1          | YGR188C                 | BUB1          |
| YJL095W                                          | BCK1          | YHL002W                 | HSE1          |
| YPL161C                                          | BEM4          | YBR019C                 | GAL10         |
| YGL178W                                          | MPT5          | YLR085C                 | ARP6          |
| YLR192C                                          | HCR1          | YJR084W                 | CSN12         |
| YDR363W-A                                        | SEM1          | YGR135W                 | PRE9          |
| YPR030W                                          | CSR2          | YLR180W                 | SAM1          |
| YNL307C                                          | MCK1          | YHR013C                 | ARD1          |
| YBR009C                                          | HHF1          | YDR227W                 | SIR4          |
| YHR200W                                          | RPN10         | YDR076W                 | RAD55         |
| YIL053W                                          | RHR2          | YMR311C                 | GLC8          |
| YBR127C                                          | VMA2          | YDL161W                 | ENT1          |
| YJR032W                                          | CPR7          | YER122C                 | GLO3          |
| YOR195W                                          | SLK19         | YBR084C-A               | RPL19A        |
| YPR084W                                          | YPR084W       | YDR202C                 | RAV2          |
| YCR053W                                          | THR4          | YER122C                 | GLO3          |
| YKL139W                                          | CTK1          | YKR061W                 | KTR2          |
| YGL078C                                          | DBP3          | YPR030W                 | CSR2          |
| YLR288C                                          | MEC3          | YCR086W                 | CSM1          |
| YFR010W                                          | UBP6          | YGR071C                 | YGR071C       |
| YNL079C                                          | TPM1          | YKL161C                 | YKL161C       |
| YPL042C                                          | SSN3          | YGL025C                 | PGD1          |
| YAL024C                                          | LTE1          | YOL054W                 | PSH1          |
| YGL054C                                          | ERV14         | YNL238W                 | KEX2          |
| YBR126C                                          | TPS1          | YCR088W                 | ABP1          |
| YJR033C                                          | RAV1          | YKR030W                 | GMH1          |

| Predictions at threshold level 0.75 continued... |               |                         |               |
|--------------------------------------------------|---------------|-------------------------|---------------|
| Gene1 of predicted pair                          |               | Gene2 of predicted pair |               |
| Systematic Name                                  | Standard Name | Systematic Name         | Standard Name |
| YLR234W                                          | TOP3          | YCR031C                 | RPS14A        |
| YDL160C                                          | DHH1          | YPR163C                 | TIF3          |
| YMR026C                                          | PEX12         | YGL153W                 | PEX14         |
| YKR057W                                          | RPS21A        | YGR135W                 | PRE9          |
| YBL058W                                          | SHP1          | YOR270C                 | VPH1          |
| YLR095C                                          | IOC2          | YBR030W                 | YBR030W       |
| YDR245W                                          | MNN10         | YBR082C                 | UBC4          |
| YDR137W                                          | RGP1          | YKR020W                 | VPS51         |
| YKL139W                                          | CTK1          | YEL053C                 | MAK10         |
| YNL032W                                          | SIW14         | YBL025W                 | RRN10         |
| YLR320W                                          | MMS22         | YMR214W                 | SCJ1          |
| YDR443C                                          | SSN2          | YGL212W                 | VAM7          |
| YGR275W                                          | RTT102        | YNR023W                 | SNF12         |
| YDL101C                                          | DUN1          | YDR477W                 | SNF1          |
| YGR270W                                          | YTA7          | YBR114W                 | RAD16         |
| YBR200W                                          | BEM1          | YPL137C                 | GIP3          |
| YLR018C                                          | POM34         | YPL256C                 | CLN2          |
| YMR026C                                          | PEX12         | YEL060C                 | PRB1          |
| YPL024W                                          | RMI1          | YNL215W                 | IES2          |
| YDL184C                                          | RPL41A        | YLR180W                 | SAM1          |
| YPL024W                                          | RMI1          | YER162C                 | RAD4          |
| YPR120C                                          | CLB5          | YHR115C                 | DMA1          |
| YER059W                                          | PCL6          | YIL050W                 | PCL7          |
| YJL151C                                          | SNA3          | YHR016C                 | YSC84         |
| YIL008W                                          | URM1          | YGL031C                 | RPL24A        |
| YGL237C                                          | HAP2          | YIL008W                 | URM1          |
| YBL103C                                          | RTG3          | YMR311C                 | GLC8          |
| YMR202W                                          | ERG2          | YPR173C                 | VPS4          |
| YMR116C                                          | ASC1          | YJL095W                 | BCK1          |

| Predictions at threshold level 0.75 continued... |               |                         |               |
|--------------------------------------------------|---------------|-------------------------|---------------|
| Gene1 of predicted pair                          |               | Gene2 of predicted pair |               |
| Systematic Name                                  | Standard Name | Systematic Name         | Standard Name |
| YMR273C                                          | ZDS1          | YNL199C                 | GCR2          |
| YEL043W                                          | YEL043W       | YGR089W                 | NNF2          |
| YBR260C                                          | RGD1          | YLR371W                 | ROM2          |
| YOR106W                                          | VAM3          | YDR155C                 | CPR1          |
| YLR234W                                          | TOP3          | YPL001W                 | HAT1          |
| YBR289W                                          | SNF5          | YOR064C                 | YNG1          |
| YPL115C                                          | BEM3          | YGR270W                 | YTA7          |
| YIL007C                                          | NAS2          | YPL161C                 | BEM4          |
| YKL126W                                          | YPK1          | YPL195W                 | APL5          |
| YKL010C                                          | UFD4          | YHR200W                 | RPN10         |
| YGL147C                                          | RPL9A         | YFL023W                 | BUD27         |
| YDR156W                                          | RPA14         | YOL054W                 | PSH1          |
| YFR030W                                          | MET10         | YFR036W                 | CDC26         |
| YKL116C                                          | PRR1          | YNR072W                 | HXT17         |
| YGR261C                                          | APL6          | YOR109W                 | INP53         |
| YJL187C                                          | SWE1          | YNL116W                 | DMA2          |
| YLR362W                                          | STE11         | YBL016W                 | FUS3          |
| YMR038C                                          | CCS1          | YGR188C                 | BUB1          |
| YDR320C                                          | SWA2          | YHR060W                 | VMA22         |
| YLR350W                                          | ORM2          | YAL002W                 | VPS8          |
| YMR095C                                          | SNO1          | YLR441C                 | RPS1A         |
| YFR010W                                          | UBP6          | YLR441C                 | RPS1A         |
| YGR249W                                          | MGA1          | YDL184C                 | RPL41A        |
| YGL223C                                          | COG1          | YGL115W                 | SNF4          |
| YHR111W                                          | UBA4          | YNL225C                 | CNM67         |
| YPR036W                                          | VMA13         | YPR046W                 | MCM16         |
| YLR386W                                          | VAC14         | YPL037C                 | EGD1          |
| YDR261C                                          | EXG2          | YPR046W                 | MCM16         |
| YGR184C                                          | UBR1          | YDR318W                 | MCM21         |

| Predictions at threshold level 0.75 continued... |               |                         |               |
|--------------------------------------------------|---------------|-------------------------|---------------|
| Gene1 of predicted pair                          |               | Gene2 of predicted pair |               |
| Systematic Name                                  | Standard Name | Systematic Name         | Standard Name |
| YPR173C                                          | VPS4          | YKL002W                 | DID4          |
| YDR383C                                          | NKP1          | YHR111W                 | UBA4          |
| YOR112W                                          | CEX1          | YPL195W                 | APL5          |
| YBR274W                                          | CHK1          | YDR289C                 | RTT103        |
| YBR126C                                          | TPS1          | YMR016C                 | SOK2          |
| YJL058C                                          | BIT61         | YJR060W                 | CBF1          |
| YJL210W                                          | PEX2          | YOL044W                 | PEX15         |
| YLR381W                                          | CTF3          | YMR038C                 | CCS1          |
| YBR084C-A                                        | RPL19A        | YPL161C                 | BEM4          |
| YDR443C                                          | SSN2          | YNR072W                 | HXT17         |
| YER120W                                          | SCS2          | YGR105W                 | VMA21         |
| YER107C                                          | GLE2          | YER016W                 | BIM1          |
| YKL048C                                          | ELM1          | YFR036W                 | CDC26         |
| YOR337W                                          | TEA1          | YHR200W                 | RPN10         |
| YBL103C                                          | RTG3          | YGL212W                 | VAM7          |
| YGR249W                                          | MGA1          | YGL212W                 | VAM7          |
| YBL079W                                          | NUP170        | YGL175C                 | SAE2          |
| YHR056C                                          | RSC30         | YDL047W                 | SIT4          |
| YEL043W                                          | YEL043W       | YNL041C                 | COG6          |
| YDL052C                                          | SLC1          | YKL094W                 | YJU3          |
| YOL111C                                          | MDY2          | YLR370C                 | ARC18         |
| YNL069C                                          | RPL16B        | YML071C                 | COG8          |
| YNL229C                                          | URE2          | YIL008W                 | URM1          |
| YGR014W                                          | MSB2          | YGL200C                 | EMP24         |
| YER118C                                          | SHO1          | YHL002W                 | HSE1          |
| YIL053W                                          | RHR2          | YNL307C                 | MCK1          |
| YHR200W                                          | RPN10         | YOR014W                 | RTS1          |
| YOR023C                                          | AHC1          | YER110C                 | KAP123        |
| YMR095C                                          | SNO1          | YFL023W                 | BUD27         |

| Predictions at threshold level 0.75 continued... |               |                         |               |
|--------------------------------------------------|---------------|-------------------------|---------------|
| Gene1 of predicted pair                          |               | Gene2 of predicted pair |               |
| Systematic Name                                  | Standard Name | Systematic Name         | Standard Name |
| YDL223C                                          | HBT1          | YOR043W                 | WHI2          |
| YDL101C                                          | DUN1          | YKR072C                 | SIS2          |
| YMR133W                                          | REC114        | YOR035C                 | SHE4          |
| YHR012W                                          | VPS29         | YIL133C                 | RPL16A        |
| YLR396C                                          | VPS33         | YOR035C                 | SHE4          |
| YDR293C                                          | SSD1          | YEL051W                 | VMA8          |
| YLR360W                                          | VPS38         | YPL037C                 | EGD1          |
| YDR477W                                          | SNF1          | YER162C                 | RAD4          |
| YDR329C                                          | PEX3          | YOL044W                 | PEX15         |
| YAL024C                                          | LTE1          | YJR056C                 | YJR056C       |
| YNL116W                                          | DMA2          | YGR188C                 | BUB1          |
| YKL126W                                          | YPK1          | YMR230W                 | RPS10B        |
| YLR288C                                          | MEC3          | YGL163C                 | RAD54         |
| YLR386W                                          | VAC14         | YHR115C                 | DMA1          |
| YMR164C                                          | MSS11         | YNL199C                 | GCR2          |
| YGL033W                                          | HOP2          | YBL025W                 | RRN10         |
| YJR060W                                          | CBF1          | YPL018W                 | CTF19         |
| YNL166C                                          | BNI5          | YDL155W                 | CLB3          |
| YGL237C                                          | HAP2          | YEL056W                 | HAT2          |
| YDR329C                                          | PEX3          | YDR244W                 | PEX5          |
| YMR127C                                          | SAS2          | YER110C                 | KAP123        |
| YIL148W                                          | RPL40A        | YMR164C                 | MSS11         |
| YAL024C                                          | LTE1          | YLR398C                 | SKI2          |
| YMR216C                                          | SKY1          | YOL018C                 | TLG2          |
| YNL215W                                          | IES2          | YBR274W                 | CHK1          |
| YGR261C                                          | APL6          | YGR105W                 | VMA21         |
| YBR274W                                          | CHK1          | YER161C                 | SPT2          |
| YIL159W                                          | BNR1          | YOR327C                 | SNC2          |
| YGL038C                                          | OCH1          | YML071C                 | COG8          |

| Predictions at threshold level 0.75 continued... |               |                         |               |
|--------------------------------------------------|---------------|-------------------------|---------------|
| Gene1 of predicted pair                          |               | Gene2 of predicted pair |               |
| Systematic Name                                  | Standard Name | Systematic Name         | Standard Name |
| YBR194W                                          | SOY1          | YPL057C                 | SUR1          |
| YDR103W                                          | STE5          | YLR313C                 | SPH1          |
| YGR019W                                          | UGA1          | YGL253W                 | HXK2          |
| YNL238W                                          | KEX2          | YNR032W                 | PPG1          |
| YIL076W                                          | SEC28         | YKR001C                 | VPS1          |
| YNL325C                                          | FIG4          | YEL053C                 | MAK10         |
| YJL124C                                          | LSM1          | YNL199C                 | GCR2          |
| YLR410W                                          | VIP1          | YKR048C                 | NAP1          |
| YGR040W                                          | KSS1          | YLR452C                 | SST2          |
| YMR153W                                          | NUP53         | YOL121C                 | RPS19A        |
| YFR031C-A                                        | RPL2A         | YGL115W                 | SNF4          |
| YGR020C                                          | VMA7          | YEL051W                 | VMA8          |
| YGL025C                                          | PGD1          | YER040W                 | GLN3          |
| YKL110C                                          | KTI12         | YHR115C                 | DMA1          |
| YBR057C                                          | MUM2          | YDR440W                 | DOT1          |
| YML103C                                          | NUP188        | YKR024C                 | DBP7          |
| YBL058W                                          | SHP1          | YNL238W                 | KEX2          |
| YLR240W                                          | VPS34         | YDL226C                 | GCS1          |
| YOR112W                                          | CEX1          | YOR327C                 | SNC2          |
| YLL039C                                          | UBI4          | YPR154W                 | PIN3          |
| YKL006W                                          | RPL14A        | YGL153W                 | PEX14         |
| YBR194W                                          | SOY1          | YML097C                 | VPS9          |
| YGL237C                                          | HAP2          | YDR254W                 | CHL4          |
| YOR191W                                          | RIS1          | YPR119W                 | CLB2          |
| YPR131C                                          | NAT3          | YMR198W                 | CIK1          |
| YCR066W                                          | RAD18         | YNL107W                 | YAF9          |
| YJL029C                                          | VPS53         | YKR020W                 | VPS51         |
| YGR004W                                          | PEX31         | YDR479C                 | PEX29         |
| YBR107C                                          | IML3          | YJR063W                 | RPA12         |



| Predictions at threshold level 0.75 continued... |               |                         |               |
|--------------------------------------------------|---------------|-------------------------|---------------|
| Gene1 of predicted pair                          |               | Gene2 of predicted pair |               |
| Systematic Name                                  | Standard Name | Systematic Name         | Standard Name |
| YER139C                                          | YER139C       | YEL060C                 | PRB1          |
| YDL013W                                          | SLX5          | YDR254W                 | CHL4          |
| YOR156C                                          | NFI1          | YOR106W                 | VAM3          |
| YDL006W                                          | PTC1          | YJL187C                 | SWE1          |
| YOL061W                                          | PRS5          | YBL068W                 | PRS4          |
| YDR080W                                          | VPS41         | YNL147W                 | LSM7          |
| YGL190C                                          | CDC55         | YPL240C                 | HSP82         |
| YGL115W                                          | SNF4          | YMR054W                 | STV1          |
| YOR112W                                          | CEX1          | YPR032W                 | SRO7          |
| YOR080W                                          | DIA2          | YHL031C                 | GOS1          |
| YOL051W                                          | GAL11         | YGL025C                 | PGD1          |
| YHL031C                                          | GOS1          | YPL195W                 | APL5          |
| YJL053W                                          | PEP8          | YOR112W                 | CEX1          |
| YGL212W                                          | VAM7          | YBR019C                 | GAL10         |
| YNL238W                                          | KEX2          | YEL036C                 | ANP1          |
| YNL291C                                          | MID1          | YNL082W                 | PMS1          |
| YOR195W                                          | SLK19         | YHR115C                 | DMA1          |
| YMR142C                                          | RPL13B        | YMR152W                 | YIM1          |
| YHR060W                                          | VMA22         | YOR035C                 | SHE4          |
| YGL078C                                          | DBP3          | YPR046W                 | MCM16         |
| YHR156C                                          | LIN1          | YER040W                 | GLN3          |
| YDL155W                                          | CLB3          | YJR032W                 | CPR7          |
| YJL124C                                          | LSM1          | YKR026C                 | GCN3          |
| YOL121C                                          | RPS19A        | YPL195W                 | APL5          |
| YLR094C                                          | GIS3          | YML001W                 | YPT7          |
| YPL152W                                          | RRD2          | YGR135W                 | PRE9          |
| YKL116C                                          | PRR1          | YKL126W                 | YPK1          |
| YGL163C                                          | RAD54         | YAL009W                 | SPO7          |
| YGL060W                                          | YBP2          | YDL047W                 | SIT4          |

| Predictions at threshold level 0.75 continued... |               |                         |               |
|--------------------------------------------------|---------------|-------------------------|---------------|
| Gene1 of predicted pair                          |               | Gene2 of predicted pair |               |
| Systematic Name                                  | Standard Name | Systematic Name         | Standard Name |
| YFL023W                                          | BUD27         | YOL121C                 | RPS19A        |
| YML115C                                          | VAN1          | YKL048C                 | ELM1          |
| YDL155W                                          | CLB3          | YJR135C                 | MCM22         |
| YBR030W                                          | YBR030W       | YGL212W                 | VAM7          |
| YGL033W                                          | HOP2          | YBR171W                 | SEC66         |
| YJR084W                                          | CSN12         | YAL002W                 | VPS8          |
| YGR020C                                          | VMA7          | YNL238W                 | KEX2          |
| YDR146C                                          | SWI5          | YHR039C-A               | VMA10         |
| YDR080W                                          | VPS41         | YNL041C                 | COG6          |
| YDR335W                                          | MSN5          | YOR124C                 | UBP2          |
| YNL297C                                          | MON2          | YDR155C                 | CPR1          |
| YEL009C                                          | GCN4          | YGL066W                 | SGF73         |
| YOR191W                                          | RIS1          | YJL176C                 | SWI3          |
| YKL213C                                          | DOA1          | YCR077C                 | PAT1          |
| YBR030W                                          | YBR030W       | YBR036C                 | CSG2          |
| YFR010W                                          | UBP6          | YGL174W                 | BUD13         |
| YGL133W                                          | ITC1          | YGL066W                 | SGF73         |
| YJL004C                                          | SYS1          | YEL051W                 | VMA8          |
| YPL161C                                          | BEM4          | YDR440W                 | DOT1          |
| YOR083W                                          | WHI5          | YJL058C                 | BIT61         |
| YBL051C                                          | PIN4          | YHL002W                 | HSE1          |
| YDR108W                                          | GSG1          | YJR033C                 | RAV1          |
| YLR079W                                          | SIC1          | YIL103W                 | DPH1          |
| YER144C                                          | UBP5          | YOR043W                 | WHI2          |
| YIR005W                                          | IST3          | YJL006C                 | CTK2          |
| YJR063W                                          | RPA12         | YPR046W                 | MCM16         |
| YGL147C                                          | RPL9A         | YDR261C                 | EXG2          |
| YHR178W                                          | STB5          | YEL053C                 | MAK10         |
| YLR083C                                          | EMP70         | YAR014C                 | BUD14         |

| Predictions at threshold level 0.75 continued... |               |                         |               |
|--------------------------------------------------|---------------|-------------------------|---------------|
| Gene1 of predicted pair                          |               | Gene2 of predicted pair |               |
| Systematic Name                                  | Standard Name | Systematic Name         | Standard Name |
| YKL010C                                          | UFD4          | YDR129C                 | SAC6          |
| YDL020C                                          | RPN4          | YDR155C                 | CPR1          |
| YPL042C                                          | SSN3          | YIL076W                 | SEC28         |
| YPL256C                                          | CLN2          | YHR108W                 | GGA2          |
| YDR379W                                          | RGA2          | YHR115C                 | DMA1          |
| YHR167W                                          | THP2          | YMR038C                 | CCS1          |
| YGL054C                                          | ERV14         | YML071C                 | COG8          |
| YDL160C                                          | DHH1          | YDR422C                 | SIP1          |
| YPR036W                                          | VMA13         | YBR036C                 | CSG2          |
| YJR084W                                          | CSN12         | YDL192W                 | ARF1          |
| YDR057W                                          | YOS9          | YDR144C                 | MKC7          |
| YLR135W                                          | SLX4          | YBR082C                 | UBC4          |
| YKL025C                                          | PAN3          | YGR270W                 | YTA7          |
| YGR241C                                          | YAP1802       | YLR396C                 | VPS33         |
| YNL206C                                          | RTT106        | YNL030W                 | HHF2          |
| YLR337C                                          | VRP1          | YHR178W                 | STB5          |
| YLR109W                                          | AHP1          | YLR043C                 | TRX1          |
| YMR224C                                          | MRE11         | YHR060W                 | VMA22         |
| YIL002C                                          | INP51         | YGL212W                 | VAM7          |
| YNL206C                                          | RTT106        | YKL032C                 | IXR1          |
| YJL004C                                          | SYS1          | YPL120W                 | VPS30         |
| YPL022W                                          | RAD1          | YDR200C                 | VPS64         |
| YPL045W                                          | VPS16         | YDL077C                 | VAM6          |
| YDR004W                                          | RAD57         | YGL163C                 | RAD54         |
| YDR383C                                          | NKP1          | YLR315W                 | NKP2          |
| YMR152W                                          | YIM1          | YBL025W                 | RRN10         |
| YMR116C                                          | ASC1          | YHL002W                 | HSE1          |
| YEL015W                                          | EDC3          | YER032W                 | FIR1          |
| YJL124C                                          | LSM1          | YDR183W                 | PLP1          |

| Predictions at threshold level 0.75 continued... |               |                         |               |
|--------------------------------------------------|---------------|-------------------------|---------------|
| Gene1 of predicted pair                          |               | Gene2 of predicted pair |               |
| Systematic Name                                  | Standard Name | Systematic Name         | Standard Name |
| YML100W                                          | TSL1          | YFL033C                 | RIM15         |
| YPL018W                                          | CTF19         | YML028W                 | TSA1          |
| YMR153W                                          | NUP53         | YPL246C                 | RBD2          |
| YBR173C                                          | UMP1          | YBR217W                 | ATG12         |
| YML102W                                          | CAC2          | YOR368W                 | RAD17         |
| YJL124C                                          | LSM1          | YLR350W                 | ORM2          |
| YMR095C                                          | SNO1          | YNL238W                 | KEX2          |
| YKL139W                                          | CTK1          | YNL307C                 | MCK1          |
| YPR018W                                          | RLF2          | YDR318W                 | MCM21         |
| YPL042C                                          | SSN3          | YDL047W                 | SIT4          |
| YDL020C                                          | RPN4          | YOR127W                 | RGA1          |
| YKR099W                                          | BAS1          | YDL077C                 | VAM6          |
| YDL020C                                          | RPN4          | YLR360W                 | VPS38         |
| YDL161W                                          | ENT1          | YHR108W                 | GGA2          |
| YPR028W                                          | YOP1          | YDL077C                 | VAM6          |
| YHR039C-A                                        | VMA10         | YER162C                 | RAD4          |
| YDL002C                                          | NHP10         | YKL213C                 | DOA1          |
| YOL145C                                          | CTR9          | YGL237C                 | HAP2          |
| YLR288C                                          | MEC3          | YHR178W                 | STB5          |
| YHR200W                                          | RPN10         | YDL083C                 | RPS16B        |
| YNL243W                                          | SLA2          | YGR078C                 | PAC10         |
| YMR224C                                          | MRE11         | YBR036C                 | CSG2          |
| YLR429W                                          | CRN1          | YDR200C                 | VPS64         |
| YBR019C                                          | GAL10         | YLR180W                 | SAM1          |
| YOR195W                                          | SLK19         | YML095C                 | RAD10         |
| YIL159W                                          | BNR1          | YOR270C                 | VPH1          |
| YFL013C                                          | IES1          | YPL042C                 | SSN3          |
| YNL078W                                          | NIS1          | YHR114W                 | BZZ1          |
| YDR293C                                          | SSD1          | YEL043W                 | YEL043W       |

| Predictions at threshold level 0.75 continued... |               |                         |               |
|--------------------------------------------------|---------------|-------------------------|---------------|
| Gene1 of predicted pair                          |               | Gene2 of predicted pair |               |
| Systematic Name                                  | Standard Name | Systematic Name         | Standard Name |
| YEL065W                                          | SIT1          | YER162C                 | RAD4          |
| YDL223C                                          | HBT1          | YHR039C-A               | VMA10         |
| YER044C                                          | ERG28         | YLR094C                 | GIS3          |
| YJL187C                                          | SWE1          | YGR152C                 | RSR1          |
| YJL172W                                          | CPS1          | YNL307C                 | MCK1          |
| YPL115C                                          | BEM3          | YLR360W                 | VPS38         |
| YMR004W                                          | MVP1          | YGL115W                 | SNF4          |
| YOR132W                                          | VPS17         | YMR109W                 | MYO5          |
| YGL078C                                          | DBP3          | YNL325C                 | FIG4          |
| YLR234W                                          | TOP3          | YDR146C                 | SWI5          |
| YDR254W                                          | CHL4          | YKL114C                 | APN1          |
| YLR083C                                          | EMP70         | YOR069W                 | VPS5          |
| YKR035W-A                                        | DID2          | YNL041C                 | COG6          |
| YLR102C                                          | APC9          | YDL047W                 | SIT4          |
| YKL139W                                          | CTK1          | YKL126W                 | YPK1          |
| YNL079C                                          | TPM1          | YLR370C                 | ARC18         |
| YLR090W                                          | XDJ1          | YOR337W                 | TEA1          |
| YPL042C                                          | SSN3          | YDR137W                 | RGP1          |
| YAL016W                                          | TPD3          | YGL190C                 | CDC55         |
| YBR108W                                          | YBR108W       | YMR133W                 | REC114        |
| YBR131W                                          | CCZ1          | YNL297C                 | MON2          |
| YBR279W                                          | PAF1          | YGL178W                 | MPT5          |
| YOL111C                                          | MDY2          | YML001W                 | YPT7          |
| YDL020C                                          | RPN4          | YBR020W                 | GAL1          |
| YBL021C                                          | HAP3          | YGR188C                 | BUB1          |
| YER116C                                          | SLX8          | YHR200W                 | RPN10         |
| YOL145C                                          | CTR9          | YHR200W                 | RPN10         |
| YDL020C                                          | RPN4          | YHR114W                 | BZZ1          |
| YML103C                                          | NUP188        | YDR076W                 | RAD55         |

| Predictions at threshold level 0.75 continued... |               |                         |               |
|--------------------------------------------------|---------------|-------------------------|---------------|
| Gene1 of predicted pair                          |               | Gene2 of predicted pair |               |
| Systematic Name                                  | Standard Name | Systematic Name         | Standard Name |
| YGR020C                                          | VMA7          | YML071C                 | COG8          |
| YOR106W                                          | VAM3          | YJL004C                 | SYS1          |
| YEL043W                                          | YEL043W       | YJR033C                 | RAV1          |
| YLR096W                                          | KIN2          | YPR032W                 | SRO7          |
| YBL085W                                          | BOI1          | YGR152C                 | RSR1          |
| YJL154C                                          | VPS35         | YHR161C                 | YAP1801       |
| YGR249W                                          | MGA1          | YER122C                 | GLO3          |
| YPL024W                                          | RMI1          | YOR290C                 | SNF2          |
| YGL124C                                          | MON1          | YER040W                 | GLN3          |
| YGL087C                                          | MMS2          | YMR224C                 | MRE11         |
| YIL103W                                          | DPH1          | YPR046W                 | MCM16         |
| YMR153W                                          | NUP53         | YFR036W                 | CDC26         |
| YLR079W                                          | SIC1          | YDR146C                 | SWI5          |
| YER139C                                          | YER139C       | YBR280C                 | SAF1          |
| YBL047C                                          | EDE1          | YBL087C                 | RPL23A        |
| YMR199W                                          | CLN1          | YHR115C                 | DMA1          |
| YLR337C                                          | VRP1          | YKL048C                 | ELM1          |
| YCR066W                                          | RAD18         | YDL006W                 | PTC1          |
| YOR368W                                          | RAD17         | YOR014W                 | RTS1          |
| YJL172W                                          | CPS1          | YOR035C                 | SHE4          |
| YDR477W                                          | SNF1          | YER027C                 | GAL83         |
| YNL106C                                          | INP52         | YHR134W                 | WSS1          |
| YDL020C                                          | RPN4          | YKL160W                 | ELF1          |
| YLR079W                                          | SIC1          | YCR086W                 | CSM1          |
| YGR072W                                          | UPF3          | YHR077C                 | NMD2          |
| YOR132W                                          | VPS17         | YGL124C                 | MON1          |
| YNR072W                                          | HXT17         | YOR035C                 | SHE4          |
| YNL058C                                          | YNL058C       | YNL307C                 | MCK1          |
| YIL076W                                          | SEC28         | YKL126W                 | YPK1          |

| Predictions at threshold level 0.75 continued... |               |                         |               |
|--------------------------------------------------|---------------|-------------------------|---------------|
| Gene1 of predicted pair                          |               | Gene2 of predicted pair |               |
| Systematic Name                                  | Standard Name | Systematic Name         | Standard Name |
| YGR275W                                          | RTT102        | YHR056C                 | RSC30         |
| YNR072W                                          | HXT17         | YOL111C                 | MDY2          |
| YOR127W                                          | RGA1          | YMR216C                 | SKY1          |
| YPL253C                                          | VIK1          | YDL155W                 | CLB3          |
| YNL041C                                          | COG6          | YGR188C                 | BUB1          |
| YJL183W                                          | MNN11         | YBR082C                 | UBC4          |
| YDR146C                                          | SWI5          | YGL148W                 | ARO2          |
| YNL243W                                          | SLA2          | YPR173C                 | VPS4          |
| YMR055C                                          | BUB2          | YGL250W                 | RMR1          |
| YPL050C                                          | MNN9          | YKL213C                 | DOA1          |
| YJR060W                                          | CBF1          | YDL077C                 | VAM6          |
| YIL053W                                          | RHR2          | YKL126W                 | YPK1          |
| YJR060W                                          | CBF1          | YOL018C                 | TLG2          |
| YIL076W                                          | SEC28         | YJL172W                 | CPS1          |
| YMR276W                                          | DSK2          | YPL248C                 | GAL4          |
| YKR035W-A                                        | DID2          | YLR370C                 | ARC18         |
| YNL238W                                          | KEX2          | YDL006W                 | PTC1          |
| YDL116W                                          | NUP84         | YLR234W                 | TOP3          |
| YMR142C                                          | RPL13B        | YMR016C                 | SOK2          |
| YJL004C                                          | SYS1          | YLR309C                 | IMH1          |
| YGR081C                                          | SLX9          | YKR095W                 | MLP1          |
| YFR030W                                          | MET10         | YGL252C                 | RTG2          |
| YER044C                                          | ERG28         | YPL195W                 | APL5          |
| YML102W                                          | CAC2          | YPR119W                 | CLB2          |
| YLR090W                                          | XDJ1          | YMR230W                 | RPS10B        |
| YOR039W                                          | CKB2          | YJR032W                 | CPR7          |
| YGR019W                                          | UGA1          | YHR134W                 | WSS1          |
| YPR084W                                          | YPR084W       | YOR038C                 | HIR2          |
| YPR017C                                          | DSS4          | YHR060W                 | VMA22         |

| Predictions at threshold level 0.75 continued... |               |                         |               |
|--------------------------------------------------|---------------|-------------------------|---------------|
| Gene1 of predicted pair                          |               | Gene2 of predicted pair |               |
| Systematic Name                                  | Standard Name | Systematic Name         | Standard Name |
| YLR435W                                          | TSR2          | YLR350W                 | ORM2          |
| YLR315W                                          | NKP2          | YJR135C                 | MCM22         |
| YPL037C                                          | EGD1          | YKR001C                 | VPS1          |
| YDR137W                                          | RGP1          | YMR038C                 | CCS1          |
| YMR039C                                          | SUB1          | YNL206C                 | RTT106        |
| YNL325C                                          | FIG4          | YMR152W                 | YIM1          |
| YNL079C                                          | TPM1          | YKL041W                 | VPS24         |
| YMR039C                                          | SUB1          | YDR318W                 | MCM21         |
| YPL037C                                          | EGD1          | YJR032W                 | CPR7          |
| YOL051W                                          | GAL11         | YOR101W                 | RAS1          |
| YML063W                                          | RPS1B         | YHR084W                 | STE12         |
| YBR173C                                          | UMP1          | YPR036W                 | VMA13         |
| YBL047C                                          | EDE1          | YJR035W                 | RAD26         |
| YBL058W                                          | SHP1          | YDR261C                 | EXG2          |
| YPR119W                                          | CLB2          | YNL197C                 | WHI3          |
| YDR383C                                          | NKP1          | YOR141C                 | ARP8          |
| YHR039C-A                                        | VMA10         | YCR077C                 | PAT1          |
| YML115C                                          | VAN1          | YPL256C                 | CLN2          |
| YGL033W                                          | HOP2          | YNL032W                 | SIW14         |
| YLR288C                                          | MEC3          | YDL059C                 | RAD59         |
| YIL156W                                          | UBP7          | YER115C                 | SPR6          |
| YLR410W                                          | VIP1          | YDR183W                 | PLP1          |
| YNL051W                                          | COG5          | YER122C                 | GLO3          |
| YHR013C                                          | ARD1          | YPL018W                 | CTF19         |
| YNL215W                                          | IES2          | YJL124C                 | LSM1          |
| YGL060W                                          | YBP2          | YDR254W                 | CHL4          |
| YFR031C-A                                        | RPL2A         | YNL297C                 | MON2          |
| YMR284W                                          | YKU70         | YDR207C                 | UME6          |
| YOR270C                                          | VPH1          | YBR019C                 | GAL10         |



| Predictions at threshold level 0.75 continued... |               |                         |               |
|--------------------------------------------------|---------------|-------------------------|---------------|
| Gene1 of predicted pair                          |               | Gene2 of predicted pair |               |
| Systematic Name                                  | Standard Name | Systematic Name         | Standard Name |
| YJL006C                                          | CTK2          | YPR046W                 | MCM16         |
| YJL053W                                          | PEP8          | YLR396C                 | VPS33         |
| YDR129C                                          | SAC6          | YBR200W                 | BEM1          |
| YHR052W                                          | CIC1          | YLR435W                 | TSR2          |
| YGR020C                                          | VMA7          | YGL223C                 | COG1          |
| YIL148W                                          | RPL40A        | YMR273C                 | ZDS1          |
| YGL163C                                          | RAD54         | YOR141C                 | ARP8          |
| YHR084W                                          | STE12         | YHR030C                 | SLT2          |
| YMR179W                                          | SPT21         | YPR046W                 | MCM16         |
| YJL078C                                          | PRY3          | YDR105C                 | TMS1          |
| YBL103C                                          | RTG3          | YDR137W                 | RGP1          |
| YNL291C                                          | MID1          | YML115C                 | VAN1          |
| YBR228W                                          | SLX1          | YLR410W                 | VIP1          |
| YKR061W                                          | KTR2          | YPR046W                 | MCM16         |
| YMR055C                                          | BUB2          | YBR114W                 | RAD16         |
| YCR002C                                          | CDC10         | YJL187C                 | SWE1          |
| YNL291C                                          | MID1          | YDR108W                 | GSG1          |
| YMR127C                                          | SAS2          | YKL160W                 | ELF1          |
| YPR052C                                          | NHP6A         | YDR225W                 | HTA1          |
| YDR176W                                          | NGG1          | YBR010W                 | HHT1          |
| YPL105C                                          | YPL105C       | YKL074C                 | MUD2          |
| YGL100W                                          | SEH1          | YNL250W                 | RAD50         |
| YGL025C                                          | PGD1          | YBR010W                 | HHT1          |
| YBR108W                                          | YBR108W       | YLR144C                 | ACF2          |
| YER115C                                          | SPR6          | YOR358W                 | HAP5          |
| YKL007W                                          | CAP1          | YGL212W                 | VAM7          |
| YMR199W                                          | CLN1          | YMR125W                 | STO1          |
| YBR030W                                          | YBR030W       | YOR043W                 | WHI2          |
| YMR153W                                          | NUP53         | YBR200W                 | BEM1          |

| Predictions at threshold level 0.75 continued... |               |                         |               |
|--------------------------------------------------|---------------|-------------------------|---------------|
| Gene1 of predicted pair                          |               | Gene2 of predicted pair |               |
| Systematic Name                                  | Standard Name | Systematic Name         | Standard Name |
| YPL018W                                          | CTF19         | YLR233C                 | EST1          |
| YOR312C                                          | RPL20B        | YOR035C                 | SHE4          |
| YMR142C                                          | RPL13B        | YJR056C                 | YJR056C       |
| YDR477W                                          | SNF1          | YGL035C                 | MIG1          |
| YOR106W                                          | VAM3          | YDR080W                 | VPS41         |
| YKL129C                                          | MYO3          | YHR016C                 | YSC84         |
| YGL115W                                          | SNF4          | YOR141C                 | ARP8          |
| YGR261C                                          | APL6          | YML071C                 | COG8          |
| YKL204W                                          | EAP1          | YJL095W                 | BCK1          |
| YBR217W                                          | ATG12         | YNL058C                 | YNL058C       |
| YPR101W                                          | SNT309        | YOR308C                 | SNU66         |
| YKR048C                                          | NAP1          | YGL252C                 | RTG2          |
| YEL053C                                          | MAK10         | YMR214W                 | SCJ1          |
| YJL176C                                          | SWI3          | YDL155W                 | CLB3          |
| YDR004W                                          | RAD57         | YDR225W                 | HTA1          |
| YNL087W                                          | TCB2          | YPR030W                 | CSR2          |
| YHR200W                                          | RPN10         | YBR019C                 | GAL10         |
| YBR030W                                          | YBR030W       | YER139C                 | YER139C       |
| YDL184C                                          | RPL41A        | YOL081W                 | IRA2          |
| YNL106C                                          | INP52         | YNR052C                 | POP2          |
| YMR224C                                          | MRE11         | YBR274W                 | CHK1          |
| YCL010C                                          | SGF29         | YOL148C                 | SPT20         |
| YOR270C                                          | VPH1          | YER040W                 | GLN3          |
| YLR320W                                          | MMS22         | YCR031C                 | RPS14A        |
| YPR084W                                          | YPR084W       | YGR261C                 | APL6          |
| YPL024W                                          | RMI1          | YBR280C                 | SAF1          |
| YBR194W                                          | SOY1          | YDR254W                 | CHL4          |
| YAL024C                                          | LTE1          | YBR019C                 | GAL10         |
| YOL030W                                          | GAS5          | YOL090W                 | MSH2          |

| Predictions at threshold level 0.75 continued... |               |                         |               |
|--------------------------------------------------|---------------|-------------------------|---------------|
| Gene1 of predicted pair                          |               | Gene2 of predicted pair |               |
| Systematic Name                                  | Standard Name | Systematic Name         | Standard Name |
| YLR350W                                          | ORM2          | YOL081W                 | IRA2          |
| YGL033W                                          | HOP2          | YBR280C                 | SAF1          |
| YMR127C                                          | SAS2          | YDR318W                 | MCM21         |
| YIL076W                                          | SEC28         | YJL124C                 | LSM1          |
| YER120W                                          | SCS2          | YDL077C                 | VAM6          |
| YIL076W                                          | SEC28         | YHR081W                 | LRP1          |
| YBL103C                                          | RTG3          | YKR035W-A               | DID2          |
| YPL253C                                          | VIK1          | YJR135C                 | MCM22         |
| YGR072W                                          | UPF3          | YDR310C                 | SUM1          |
| YDR156W                                          | RPA14         | YLR182W                 | SWI6          |
| YOR195W                                          | SLK19         | YGL252C                 | RTG2          |
| YDR318W                                          | MCM21         | YPL018W                 | CTF19         |
| YGR270W                                          | YTA7          | YER139C                 | YER139C       |
| YNL218W                                          | MGS1          | YPL024W                 | RMI1          |
| YDR440W                                          | DOT1          | YMR038C                 | CCS1          |
| YGL078C                                          | DBP3          | YER044C                 | ERG28         |
| YPL246C                                          | RBD2          | YKR024C                 | DBP7          |
| YJL127C                                          | SPT10         | YML016C                 | PPZ1          |
| YLR288C                                          | MEC3          | YMR055C                 | BUB2          |
| YNL238W                                          | KEX2          | YFR036W                 | CDC26         |
| YOR327C                                          | SNC2          | YLR180W                 | SAM1          |
| YGL237C                                          | HAP2          | YGR270W                 | YTA7          |
| YOR001W                                          | RRP6          | YEL013W                 | VAC8          |
| YIL159W                                          | BNR1          | YMR142C                 | RPL13B        |
| YLR337C                                          | VRP1          | YOR312C                 | RPL20B        |
| YBL103C                                          | RTG3          | YKL126W                 | YPK1          |
| YPL152W                                          | RRD2          | YCR086W                 | CSM1          |
| YKR072C                                          | SIS2          | YMR284W                 | YKU70         |
| YKL110C                                          | KTI12         | YJR060W                 | CBF1          |

| Predictions at threshold level 0.75 continued... |               |                         |               |
|--------------------------------------------------|---------------|-------------------------|---------------|
| Gene1 of predicted pair                          |               | Gene2 of predicted pair |               |
| Systematic Name                                  | Standard Name | Systematic Name         | Standard Name |
| YMR004W                                          | MVP1          | YOL108C                 | INO4          |
| YAL020C                                          | ATS1          | YNL289W                 | PCL1          |
| YDR335W                                          | MSN5          | YPR120C                 | CLB5          |
| YPL161C                                          | BEM4          | YLR094C                 | GIS3          |
| YMR284W                                          | YKU70         | YCR086W                 | CSM1          |
| YOR195W                                          | SLK19         | YHR152W                 | SPO12         |
| YDR156W                                          | RPA14         | YNL248C                 | RPA49         |
| YDR507C                                          | GIN4          | YIL008W                 | URM1          |
| YFL023W                                          | BUD27         | YNL058C                 | YNL058C       |
| YDR174W                                          | HMO1          | YHR134W                 | WSS1          |
| YDL192W                                          | ARF1          | YEL060C                 | PRB1          |
| YJL154C                                          | VPS35         | YBR171W                 | SEC66         |
| YMR095C                                          | SNO1          | YJL172W                 | CPS1          |
| YJR140C                                          | HIR3          | YAL002W                 | VPS8          |
| YPL057C                                          | SUR1          | YOR327C                 | SNC2          |
| YLR192C                                          | HCR1          | YER122C                 | GLO3          |
| YPL042C                                          | SSN3          | YER139C                 | YER139C       |
| YLR234W                                          | TOP3          | YOR368W                 | RAD17         |
| YHR119W                                          | SET1          | YPL138C                 | SPP1          |
| YGR072W                                          | UPF3          | YNL127W                 | FAR11         |
| YNL058C                                          | YNL058C       | YKL048C                 | ELM1          |
| YLR386W                                          | VAC14         | YIL008W                 | URM1          |
| YGL087C                                          | MMS2          | YDR293C                 | SSD1          |
| YCL037C                                          | SRO9          | YNL199C                 | GCR2          |
| YML115C                                          | VAN1          | YOL111C                 | MDY2          |
| YMR004W                                          | MVP1          | YNL041C                 | COG6          |
| YJR056C                                          | YJR056C       | YLR093C                 | NYV1          |
| YGR261C                                          | APL6          | YCL037C                 | SRO9          |
| YLR095C                                          | IOC2          | YMR095C                 | SNO1          |

| Predictions at threshold level 0.75 continued... |               |                         |               |
|--------------------------------------------------|---------------|-------------------------|---------------|
| Gene1 of predicted pair                          |               | Gene2 of predicted pair |               |
| Systematic Name                                  | Standard Name | Systematic Name         | Standard Name |
| YER044C                                          | ERG28         | YDL083C                 | RPS16B        |
| YBR215W                                          | HPC2          | YLR352W                 | YLR352W       |
| YKR020W                                          | VPS51         | YGL095C                 | VPS45         |
| YLR234W                                          | TOP3          | YDL155W                 | CLB3          |
| YDL127W                                          | PCL2          | YPL001W                 | HAT1          |
| YLR313C                                          | SPH1          | YNL016W                 | PUB1          |
| YJL089W                                          | SIP4          | YGL115W                 | SNF4          |
| YBL047C                                          | EDE1          | YKL041W                 | VPS24         |
| YKL139W                                          | CTK1          | YJR063W                 | RPA12         |
| YPR131C                                          | NAT3          | YLR058C                 | SHM2          |
| YDR254W                                          | CHL4          | YML028W                 | TSA1          |
| YGL087C                                          | MMS2          | YBR108W                 | YBR108W       |
| YDL020C                                          | RPN4          | YHL002W                 | HSE1          |
| YLR399C                                          | BDF1          | YLR254C                 | NDL1          |
| YBR173C                                          | UMP1          | YDL083C                 | RPS16B        |
| YNL166C                                          | BNI5          | YJR032W                 | CPR7          |
| YPL089C                                          | RLM1          | YJL095W                 | BCK1          |
| YDR477W                                          | SNF1          | YNL307C                 | MCK1          |
| YEL043W                                          | YEL043W       | YNL127W                 | FAR11         |
| YGL087C                                          | MMS2          | YDL059C                 | RAD59         |
| YMR016C                                          | SOK2          | YBL025W                 | RRN10         |
| YDR358W                                          | GGA1          | YOR036W                 | PEP12         |
| YNL032W                                          | SIW14         | YNR072W                 | HXT17         |
| YHR114W                                          | BZZ1          | YAL002W                 | VPS8          |
| YIL159W                                          | BNR1          | YER116C                 | SLX8          |
| YML001W                                          | YPT7          | YLR398C                 | SKI2          |
| YNL238W                                          | KEX2          | YBR019C                 | GAL10         |
| YDL006W                                          | PTC1          | YKL041W                 | VPS24         |
| YDR080W                                          | VPS41         | YMR216C                 | SKY1          |

| Predictions at threshold level 0.75 continued... |               |                         |               |
|--------------------------------------------------|---------------|-------------------------|---------------|
| Gene1 of predicted pair                          |               | Gene2 of predicted pair |               |
| Systematic Name                                  | Standard Name | Systematic Name         | Standard Name |
| YGR270W                                          | YTA7          | YNL116W                 | DMA2          |
| YGL223C                                          | COG1          | YKR014C                 | YPT52         |
| YEL065W                                          | SIT1          | YNL032W                 | SIW14         |
| YBR112C                                          | CYC8          | YDL005C                 | MED2          |
| YLR206W                                          | ENT2          | YGR152C                 | RSR1          |
| YOR195W                                          | SLK19         | YHR200W                 | RPN10         |
| YLR386W                                          | VAC14         | YNL206C                 | RTT106        |
| YML071C                                          | COG8          | YER122C                 | GLO3          |
| YBL027W                                          | RPL19B        | YCR077C                 | PAT1          |
| YLR320W                                          | MMS22         | YLR180W                 | SAM1          |
| YOR083W                                          | WHI5          | YMR202W                 | ERG2          |
| YML016C                                          | PPZ1          | YBL021C                 | HAP3          |
| YEL053C                                          | MAK10         | YNL076W                 | MKS1          |
| YGL115W                                          | SNF4          | YOR028C                 | CIN5          |
| YNR072W                                          | HXT17         | YER040W                 | GLN3          |
| YPL057C                                          | SUR1          | YKR001C                 | VPS1          |
| YNL238W                                          | KEX2          | YKL041W                 | VPS24         |
| YER139C                                          | YER139C       | YEL013W                 | VAC8          |
| YPR036W                                          | VMA13         | YGR020C                 | VMA7          |
| YER162C                                          | RAD4          | YOR368W                 | RAD17         |
| YKL073W                                          | LHS1          | YBR138C                 | YBR138C       |
| YLR191W                                          | PEX13         | YLR181C                 | VTA1          |
| YLR095C                                          | IOC2          | YIL159W                 | BNR1          |
| YGL033W                                          | HOP2          | YDL077C                 | VAM6          |
| YDL013W                                          | SLX5          | YMR038C                 | CCS1          |
| YNL218W                                          | MGS1          | YMR224C                 | MRE11         |
| YCR086W                                          | CSM1          | YHL002W                 | HSE1          |
| YNL087W                                          | TCB2          | YPL195W                 | APL5          |
| YKR001C                                          | VPS1          | YMR022W                 | UBC7          |

| Predictions at threshold level 0.75 continued... |               |                         |               |
|--------------------------------------------------|---------------|-------------------------|---------------|
| Gene1 of predicted pair                          |               | Gene2 of predicted pair |               |
| Systematic Name                                  | Standard Name | Systematic Name         | Standard Name |
| YMR179W                                          | SPT21         | YDR318W                 | MCM21         |
| YDR378C                                          | LSM6          | YNL145W                 | MFA2          |
| YDR477W                                          | SNF1          | YPL137C                 | GIP3          |
| YOR001W                                          | RRP6          | YOL091W                 | SPO21         |
| YHR111W                                          | UBA4          | YNL229C                 | URE2          |
| YLR292C                                          | SEC72         | YDR289C                 | RTT103        |
| YER052C                                          | HOM3          | YNL023C                 | FAP1          |
| YAL024C                                          | LTE1          | YLR315W                 | NKP2          |
| YKL116C                                          | PRR1          | YEL053C                 | MAK10         |
| YJR060W                                          | CBF1          | YLR370C                 | ARC18         |
| YOR191W                                          | RIS1          | YPL079W                 | RPL21B        |
| YPL115C                                          | BEM3          | YHL002W                 | HSE1          |
| YKL139W                                          | CTK1          | YPL037C                 | EGD1          |
| YPR017C                                          | DSS4          | YJL154C                 | VPS35         |
| YOR290C                                          | SNF2          | YPR072W                 | NOT5          |
| YNR052C                                          | POP2          | YKR061W                 | KTR2          |
| YMR054W                                          | STV1          | YOL018C                 | TLG2          |
| YFR010W                                          | UBP6          | YPL057C                 | SUR1          |
| YPL253C                                          | VIK1          | YGL163C                 | RAD54         |
| YKL139W                                          | CTK1          | YDL047W                 | SIT4          |
| YDR382W                                          | RPP2B         | YJL124C                 | LSM1          |
| YJR060W                                          | CBF1          | YNL127W                 | FAR11         |
| YLR095C                                          | IOC2          | YOR327C                 | SNC2          |
| YML097C                                          | VPS9          | YKL041W                 | VPS24         |
| YMR153W                                          | NUP53         | YER110C                 | KAP123        |
| YHR156C                                          | LIN1          | YNL238W                 | KEX2          |
| YPL178W                                          | CBC2          | YDL047W                 | SIT4          |
| YNL243W                                          | SLA2          | YPL086C                 | ELP3          |
| YDR174W                                          | HMO1          | YNL215W                 | IES2          |

| Predictions at threshold level 0.75 continued... |               |                         |               |
|--------------------------------------------------|---------------|-------------------------|---------------|
| Gene1 of predicted pair                          |               | Gene2 of predicted pair |               |
| Systematic Name                                  | Standard Name | Systematic Name         | Standard Name |
| YDR227W                                          | SIR4          | YMR106C                 | YKU80         |
| YGL133W                                          | ITC1          | YNL068C                 | FKH2          |
| YGR159C                                          | NSR1          | YIL079C                 | AIR1          |
| YOR023C                                          | AHC1          | YGR188C                 | BUB1          |
| YDR443C                                          | SSN2          | YFR010W                 | UBP6          |
| YBL008W                                          | HIR1          | YGR188C                 | BUB1          |
| YCR020W-B                                        | HTL1          | YNL041C                 | COG6          |
| YOR106W                                          | VAM3          | YCL001W                 | RER1          |
| YBR200W                                          | BEM1          | YGR152C                 | RSR1          |
| YLR148W                                          | PEP3          | YDR484W                 | VPS52         |
| YHL031C                                          | GOS1          | YOR124C                 | UBP2          |
| YLR018C                                          | POM34         | YDR385W                 | EFT2          |
| YHR084W                                          | STE12         | YHL007C                 | STE20         |
| YNL243W                                          | SLA2          | YHR016C                 | YSC84         |
| YBR108W                                          | YBR108W       | YLR094C                 | GIS3          |
| YGL060W                                          | YBP2          | YBR215W                 | HPC2          |
| YLR192C                                          | HCR1          | YBL103C                 | RTG3          |
| YKR001C                                          | VPS1          | YDL155W                 | CLB3          |
| YOR304W                                          | ISW2          | YDR207C                 | UME6          |
| YNL076W                                          | MKS1          | YOL081W                 | IRA2          |
| YBL103C                                          | RTG3          | YOL111C                 | MDY2          |
| YER116C                                          | SLX8          | YML102W                 | CAC2          |
| YMR172W                                          | HOT1          | YBR171W                 | SEC66         |
| YDR310C                                          | SUM1          | YER040W                 | GLN3          |
| YKL068W                                          | NUP100        | YDR207C                 | UME6          |
| YNL291C                                          | MID1          | YPL120W                 | VPS30         |
| YMR224C                                          | MRE11         | YDR207C                 | UME6          |
| YIL053W                                          | RHR2          | YDL083C                 | RPS16B        |
| YPL046C                                          | ELC1          | YMR201C                 | RAD14         |



| Predictions at threshold level 0.75 continued... |               |                         |               |
|--------------------------------------------------|---------------|-------------------------|---------------|
| Gene1 of predicted pair                          |               | Gene2 of predicted pair |               |
| Systematic Name                                  | Standard Name | Systematic Name         | Standard Name |
| YLR148W                                          | PEP3          | YCR088W                 | ABP1          |
| YPL253C                                          | VIK1          | YLR315W                 | NKP2          |
| YKL025C                                          | PAN3          | YBL088C                 | TEL1          |
| YDR378C                                          | LSM6          | YGL163C                 | RAD54         |
| YER144C                                          | UBP5          | YEL053C                 | MAK10         |
| YDL077C                                          | VAM6          | YNL147W                 | LSM7          |
| YDL192W                                          | ARF1          | YAL030W                 | SNC1          |
| YBL102W                                          | SFT2          | YEL053C                 | MAK10         |
| YGL033W                                          | HOP2          | YGL124C                 | MON1          |
| YBR107C                                          | IML3          | YKL110C                 | KTI12         |
| YMR198W                                          | CIK1          | YPL253C                 | VIK1          |
| YBR030W                                          | YBR030W       | YHR081W                 | LRP1          |
| YOR308C                                          | SNU66         | YLR182W                 | SWI6          |
| YDR156W                                          | RPA14         | YJL006C                 | CTK2          |
| YCL037C                                          | SRO9          | YJR033C                 | RAV1          |
| YDL083C                                          | RPS16B        | YLR398C                 | SKI2          |
| YDR484W                                          | VPS52         | YEL053C                 | MAK10         |
| YFR010W                                          | UBP6          | YHR200W                 | RPN10         |
| YDL239C                                          | ADY3          | YOL091W                 | SPO21         |
| YOL091W                                          | SPO21         | YOR177C                 | MPC54         |
| YMR092C                                          | AIP1          | YGR080W                 | TWF1          |
| YHR160C                                          | PEX18         | YDR142C                 | PEX7          |
| YIL036W                                          | CST6          | YFR036W                 | CDC26         |
| YOR195W                                          | SLK19         | YJL095W                 | BCK1          |
| YGR261C                                          | APL6          | YHL031C                 | GOS1          |
| YOR080W                                          | DIA2          | YOR038C                 | HIR2          |
| YHR060W                                          | VMA22         | YPL195W                 | APL5          |
| YER116C                                          | SLX8          | YLR352W                 | YLR352W       |
| YOR140W                                          | SFL1          | YMR311C                 | GLC8          |

| Predictions at threshold level 0.75 continued... |               |                         |               |
|--------------------------------------------------|---------------|-------------------------|---------------|
| Gene1 of predicted pair                          |               | Gene2 of predicted pair |               |
| Systematic Name                                  | Standard Name | Systematic Name         | Standard Name |
| YBR171W                                          | SEC66         | YNL238W                 | KEX2          |
| YBL008W                                          | HIR1          | YEL050C                 | RML2          |
| YHL020C                                          | OPI1          | YPL195W                 | APL5          |
| YPR036W                                          | VMA13         | YGR188C                 | BUB1          |
| YCR034W                                          | FEN1          | YOR039W                 | CKB2          |
| YIL053W                                          | RHR2          | YBR030W                 | YBR030W       |
| YCR065W                                          | HCM1          | YPL106C                 | SSE1          |
| YGL133W                                          | ITC1          | YKL101W                 | HSL1          |
| YML001W                                          | YPT7          | YJL183W                 | MNN11         |
| YBR171W                                          | SEC66         | YMR055C                 | BUB2          |
| YMR055C                                          | BUB2          | YPR120C                 | CLB5          |
| YBR228W                                          | SLX1          | YJR140C                 | HIR3          |
| YNL069C                                          | RPL16B        | YJR060W                 | CBF1          |
| YHR157W                                          | REC104        | YPR119W                 | CLB2          |
| YOR033C                                          | EXO1          | YOL030W                 | GAS5          |
| YGR104C                                          | SRB5          | YKL160W                 | ELF1          |
| YMR172W                                          | HOT1          | YKL048C                 | ELM1          |
| YOR290C                                          | SNF2          | YNL238W                 | KEX2          |
| YGL003C                                          | CDH1          | YER139C                 | YER139C       |
| YCR086W                                          | CSM1          | YDR310C                 | SUM1          |
| YNL201C                                          | PSY2          | YJR063W                 | RPA12         |
| YNL199C                                          | GCR2          | YMR311C                 | GLC8          |
| YKR099W                                          | BAS1          | YOL121C                 | RPS19A        |
| YOR127W                                          | RGA1          | YBL087C                 | RPL23A        |
| YDR448W                                          | ADA2          | YPL129W                 | TAF14         |
| YGL158W                                          | RCK1          | YDR423C                 | CAD1          |
| YOR337W                                          | TEA1          | YMR214W                 | SCJ1          |
| YDR283C                                          | GCN2          | YFR009W                 | GCN20         |
| YJL204C                                          | RCY1          | YHR012W                 | VPS29         |

| Predictions at threshold level 0.75 continued... |               |                         |               |
|--------------------------------------------------|---------------|-------------------------|---------------|
| Gene1 of predicted pair                          |               | Gene2 of predicted pair |               |
| Systematic Name                                  | Standard Name | Systematic Name         | Standard Name |
| YJL060W                                          | BNA3          | YPR131C                 | NAT3          |
| YHR152W                                          | SPO12         | YHR115C                 | DMA1          |
| YGR019W                                          | UGA1          | YML016C                 | PPZ1          |
| YMR199W                                          | CLN1          | YDR422C                 | SIP1          |
| YOR337W                                          | TEA1          | YGL115W                 | SNF4          |
| YAL024C                                          | LTE1          | YDR245W                 | MNN10         |
| YKL213C                                          | DOA1          | YDR440W                 | DOT1          |
| YNL094W                                          | APP1          | YBR239C                 | YBR239C       |
| YHR121W                                          | LSM12         | YPR119W                 | CLB2          |
| YML001W                                          | YPT7          | YFR036W                 | CDC26         |
| YPL145C                                          | KES1          | YKL188C                 | PXA2          |
| YPR030W                                          | CSR2          | YOL081W                 | IRA2          |
| YHR178W                                          | STB5          | YHR111W                 | UBA4          |
| YGL200C                                          | EMP24         | YML067C                 | ERV41         |
| YBL005W                                          | PDR3          | YPR119W                 | CLB2          |
| YDR490C                                          | PKH1          | YGR086C                 | PIL1          |
| YGL147C                                          | RPL9A         | YOR337W                 | TEA1          |
| YPL164C                                          | MLH3          | YMR167W                 | MLH1          |
| YOR033C                                          | EXO1          | YER116C                 | SLX8          |
| YER144C                                          | UBP5          | YHR039C-A               | VMA10         |
| YGR270W                                          | YTA7          | YLR315W                 | NKP2          |
| YKL110C                                          | KTI12         | YJR135C                 | MCM22         |
| YPL022W                                          | RAD1          | YLR182W                 | SWI6          |
| YOR140W                                          | SFL1          | YIL033C                 | BCY1          |
| YMR198W                                          | CIK1          | YJR005W                 | APL1          |
| YDR477W                                          | SNF1          | YEL036C                 | ANP1          |
| YOR066W                                          | MSA1          | YEL060C                 | PRB1          |
| YPR018W                                          | RLF2          | YDL020C                 | RPN4          |
| YKL139W                                          | CTK1          | YFR036W                 | CDC26         |

| Predictions at threshold level 0.75 continued... |               |                         |               |
|--------------------------------------------------|---------------|-------------------------|---------------|
| Gene1 of predicted pair                          |               | Gene2 of predicted pair |               |
| Systematic Name                                  | Standard Name | Systematic Name         | Standard Name |
| YCL037C                                          | SRO9          | YLR350W                 | ORM2          |
| YBR194W                                          | SOY1          | YNL236W                 | SIN4          |
| YIL103W                                          | DPH1          | YNL107W                 | YAF9          |
| YEL009C                                          | GCN4          | YJL176C                 | SWI3          |
| YGL054C                                          | ERV14         | YER162C                 | RAD4          |
| YFR010W                                          | UBP6          | YOR270C                 | VPH1          |
| YNL218W                                          | MGS1          | YJL187C                 | SWE1          |
| YBL058W                                          | SHP1          | YHR060W                 | VMA22         |
| YLR337C                                          | VRP1          | YJR084W                 | CSN12         |
| YKL032C                                          | IXR1          | YBR260C                 | RGD1          |
| YBL008W                                          | HIR1          | YCR031C                 | RPS14A        |
| YMR311C                                          | GLC8          | YDR207C                 | UME6          |
| YIL076W                                          | SEC28         | YMR016C                 | SOK2          |
| YDR477W                                          | SNF1          | YMR230W                 | RPS10B        |
| YLR090W                                          | XDJ1          | YIL053W                 | RHR2          |
| YPL024W                                          | RMI1          | YNL291C                 | MID1          |
| YDR363W-A                                        | SEM1          | YDL006W                 | PTC1          |
| YFR036W                                          | CDC26         | YER040W                 | GLN3          |
| YDR183W                                          | PLP1          | YGL252C                 | RTG2          |
| YBR217W                                          | ATG12         | YOR043W                 | WHI2          |
| YML115C                                          | VAN1          | YHR081W                 | LRP1          |
| YNL215W                                          | IES2          | YMR198W                 | CIK1          |
| YIL148W                                          | RPL40A        | YPL246C                 | RBD2          |
| YGR184C                                          | UBR1          | YOR014W                 | RTS1          |
| YMR127C                                          | SAS2          | YKL048C                 | ELM1          |
| YOR212W                                          | STE4          | YDR264C                 | AKR1          |
| YKL048C                                          | ELM1          | YGL151W                 | NUT1          |
| YDR004W                                          | RAD57         | YJR135C                 | MCM22         |
| YJR056C                                          | YJR056C       | YKL048C                 | ELM1          |

| Predictions at threshold level 0.75 continued... |               |                         |               |
|--------------------------------------------------|---------------|-------------------------|---------------|
| Gene1 of predicted pair                          |               | Gene2 of predicted pair |               |
| Systematic Name                                  | Standard Name | Systematic Name         | Standard Name |
| YMR095C                                          | SNO1          | YDL192W                 | ARF1          |
| YKR035W-A                                        | DID2          | YLR093C                 | NYV1          |
| YDL013W                                          | SLX5          | YLR410W                 | VIP1          |
| YGL043W                                          | DST1          | YBR111W-A               | SUS1          |
| YNL087W                                          | TCB2          | YLR370C                 | ARC18         |
| YJR056C                                          | YJR056C       | YNL076W                 | MKS1          |
| YGR133W                                          | PEX4          | YAL002W                 | VPS8          |
| YIL159W                                          | BNR1          | YBR108W                 | YBR108W       |
| YLR429W                                          | CRN1          | YPR046W                 | MCM16         |
| YNL201C                                          | PSY2          | YML112W                 | CTK3          |
| YBR084C-A                                        | RPL19A        | YGL031C                 | RPL24A        |
| YGL078C                                          | DBP3          | YOL121C                 | RPS19A        |
| YMR153W                                          | NUP53         | YGL212W                 | VAM7          |
| YER044C                                          | ERG28         | YER040W                 | GLN3          |
| YCL001W                                          | RER1          | YML001W                 | YPT7          |
| YLR441C                                          | RPS1A         | YOL111C                 | MDY2          |
| YLR441C                                          | RPS1A         | YDL192W                 | ARF1          |
| YOR127W                                          | RGA1          | YKR020W                 | VPS51         |
| YBL067C                                          | UBP13         | YJL095W                 | BCK1          |
| YDR335W                                          | MSN5          | YFR036W                 | CDC26         |
| YDR383C                                          | NKP1          | YIR005W                 | IST3          |
| YLR441C                                          | RPS1A         | YPL037C                 | EGD1          |
| YHR200W                                          | RPN10         | YMR152W                 | YIM1          |
| YPR102C                                          | RPL11A        | YOR078W                 | BUD21         |
| YKR020W                                          | VPS51         | YNR032W                 | PPG1          |
| YHR012W                                          | VPS29         | YLR233C                 | EST1          |
| YPL057C                                          | SUR1          | YDL013W                 | SLX5          |
| YBR084C-A                                        | RPL19A        | YKL032C                 | IXR1          |
| YMR202W                                          | ERG2          | YKL048C                 | ELM1          |

| Predictions at threshold level 0.75 continued... |               |                         |               |
|--------------------------------------------------|---------------|-------------------------|---------------|
| Gene1 of predicted pair                          |               | Gene2 of predicted pair |               |
| Systematic Name                                  | Standard Name | Systematic Name         | Standard Name |
| YLR360W                                          | VPS38         | YLR381W                 | CTF3          |
| YGR217W                                          | CCH1          | YLR320W                 | MMS22         |
| YHR149C                                          | SKG6          | YMR273C                 | ZDS1          |
| YGR041W                                          | BUD9          | YOR301W                 | RAX1          |
| YLR119W                                          | SRN2          | YPL161C                 | BEM4          |
| YHR039C-A                                        | VMA10         | YCR086W                 | CSM1          |
| YGR142W                                          | BTN2          | YBR264C                 | YPT10         |
| YIR005W                                          | IST3          | YOR141C                 | ARP8          |
| YMR133W                                          | REC114        | YCR053W                 | THR4          |
| YDL223C                                          | HBT1          | YGL115W                 | SNF4          |
| YOR270C                                          | VPH1          | YJL095W                 | BCK1          |
| YER115C                                          | SPR6          | YKL068W                 | NUP100        |
| YKR001C                                          | VPS1          | YEL051W                 | VMA8          |
| YLR313C                                          | SPH1          | YOL090W                 | MSH2          |
| YGL174W                                          | BUD13         | YOR308C                 | SNU66         |
| YMR116C                                          | ASC1          | YJL187C                 | SWE1          |
| YBR098W                                          | MMS4          | YGL100W                 | SEH1          |
| YBR217W                                          | ATG12         | YPL057C                 | SUR1          |
| YBL078C                                          | ATG8          | YOL018C                 | TLG2          |
| YEL051W                                          | VMA8          | YNL051W                 | COG5          |
| YMR142C                                          | RPL13B        | YNL032W                 | SIW14         |
| YOR033C                                          | EXO1          | YGL031C                 | RPL24A        |
| YHR114W                                          | BZZ1          | YDR310C                 | SUM1          |
| YOR035C                                          | SHE4          | YDR323C                 | PEP7          |
| YJR063W                                          | RPA12         | YJL140W                 | RPB4          |
| YEL043W                                          | YEL043W       | YOL018C                 | TLG2          |
| YNL058C                                          | YNL058C       | YOR327C                 | SNC2          |
| YKL139W                                          | CTK1          | YKL160W                 | ELF1          |
| YMR167W                                          | MLH1          | YCR031C                 | RPS14A        |

| Predictions at threshold level 0.75 continued... |               |                         |               |
|--------------------------------------------------|---------------|-------------------------|---------------|
| Gene1 of predicted pair                          |               | Gene2 of predicted pair |               |
| Systematic Name                                  | Standard Name | Systematic Name         | Standard Name |
| YPL195W                                          | APL5          | YLR398C                 | SKI2          |
| YFL023W                                          | BUD27         | YDR261C                 | EXG2          |
| YNL166C                                          | BNI5          | YHR114W                 | BZZ1          |
| YHR073W                                          | OSH3          | YLR018C                 | POM34         |
| YKL139W                                          | CTK1          | YPR030W                 | CSR2          |
| YPL249C-A                                        | RPL36B        | YPR119W                 | CLB2          |
| YIL053W                                          | RHR2          | YLR093C                 | NYV1          |
| YGL033W                                          | HOP2          | YKL126W                 | YPK1          |
| YLR360W                                          | VPS38         | YER110C                 | KAP123        |
| YER162C                                          | RAD4          | YFR036W                 | CDC26         |
| YDL116W                                          | NUP84         | YPL256C                 | CLN2          |
| YDR174W                                          | HMO1          | YNL106C                 | INP52         |
| YGR072W                                          | UPF3          | YHL020C                 | OPI1          |
| YDR254W                                          | CHL4          | YFR030W                 | MET10         |
| YOL111C                                          | MDY2          | YHR081W                 | LRP1          |
| YDR293C                                          | SSD1          | YLR233C                 | EST1          |
| YOR023C                                          | AHC1          | YBR107C                 | IML3          |
| YDR507C                                          | GIN4          | YBR084C-A               | RPL19A        |
| YBR217W                                          | ATG12         | YDR261C                 | EXG2          |
| YFR031C-A                                        | RPL2A         | YGL212W                 | VAM7          |
| YCL001W                                          | RER1          | YFL033C                 | RIM15         |
| YNL291C                                          | MID1          | YKR020W                 | VPS51         |
| YBR009C                                          | HHF1          | YNL030W                 | HHF2          |
| YKR099W                                          | BAS1          | YJL183W                 | MNN11         |
| YNL139C                                          | RLR1          | YOR001W                 | RRP6          |
| YIL053W                                          | RHR2          | YFL023W                 | BUD27         |
| YDL020C                                          | RPN4          | YLR234W                 | TOP3          |
| YJL053W                                          | PEP8          | YCL001W                 | RER1          |
| YKR099W                                          | BAS1          | YLR371W                 | ROM2          |

| Predictions at threshold level 0.75 continued... |               |                         |               |
|--------------------------------------------------|---------------|-------------------------|---------------|
| Gene1 of predicted pair                          |               | Gene2 of predicted pair |               |
| Systematic Name                                  | Standard Name | Systematic Name         | Standard Name |
| YNL106C                                          | INP52         | YNL116W                 | DMA2          |
| YNL297C                                          | MON2          | YPL105C                 | YPL105C       |
| YGR261C                                          | APL6          | YKR030W                 | GMH1          |
| YJL029C                                          | VPS53         | YDR323C                 | PEP7          |
| YMR133W                                          | REC114        | YLR371W                 | ROM2          |
| YEL060C                                          | PRB1          | YER122C                 | GLO3          |
| YHL031C                                          | GOS1          | YNL297C                 | MON2          |
| YPL253C                                          | VIK1          | YIL103W                 | DPH1          |
| YNL106C                                          | INP52         | YJL006C                 | CTK2          |
| YER122C                                          | GLO3          | YGR188C                 | BUB1          |
| YLR320W                                          | MMS22         | YMR311C                 | GLC8          |
| YDR293C                                          | SSD1          | YML016C                 | PPZ1          |
| YPR120C                                          | CLB5          | YDR289C                 | RTT103        |
| YNR072W                                          | HXT17         | YJR032W                 | CPR7          |
| YMR095C                                          | SNO1          | YDR310C                 | SUM1          |
| YPR029C                                          | APL4          | YJR058C                 | APS2          |
| YFR010W                                          | UBP6          | YHR134W                 | WSS1          |
| YBL078C                                          | ATG8          | YOR106W                 | VAM3          |
| YOR275C                                          | RIM20         | YPR120C                 | CLB5          |
| YOR195W                                          | SLK19         | YIL008W                 | URM1          |
| YDR202C                                          | RAV2          | YHL020C                 | OPI1          |
| YJL151C                                          | SNA3          | YOR284W                 | HUA2          |
| YLR313C                                          | SPH1          | YBL079W                 | NUP170        |
| YMR216C                                          | SKY1          | YPL105C                 | YPL105C       |
| YPL115C                                          | BEM3          | YDR227W                 | SIR4          |
| YBR108W                                          | YBR108W       | YBL051C                 | PIN4          |
| YNR052C                                          | POP2          | YNL225C                 | CNM67         |
| YEL053C                                          | MAK10         | YCR053W                 | THR4          |
| YGL124C                                          | MON1          | YOL067C                 | RTG1          |



| Predictions at threshold level 0.75 continued... |               |                         |               |
|--------------------------------------------------|---------------|-------------------------|---------------|
| Gene1 of predicted pair                          |               | Gene2 of predicted pair |               |
| Systematic Name                                  | Standard Name | Systematic Name         | Standard Name |
| YDL101C                                          | DUN1          | YLR135W                 | SLX4          |
| YDR443C                                          | SSN2          | YMR152W                 | YIM1          |
| YNL291C                                          | MID1          | YMR055C                 | BUB2          |
| YNL288W                                          | CAF40         | YHR178W                 | STB5          |
| YOR033C                                          | EXO1          | YDR097C                 | MSH6          |
| YGL147C                                          | RPL9A         | YBL058W                 | SHP1          |
| YMR172W                                          | HOT1          | YMR055C                 | BUB2          |
| YBR057C                                          | MUM2          | YDR254W                 | CHL4          |
| YDR439W                                          | LRS4          | YJR135C                 | MCM22         |
| YJL154C                                          | VPS35         | YOR036W                 | PEP12         |
| YER068W                                          | MOT2          | YNL030W                 | HHF2          |
| YJR099W                                          | YUH1          | YHR108W                 | GGA2          |
| YNL041C                                          | COG6          | YGL003C                 | CDH1          |
| YGL115W                                          | SNF4          | YML071C                 | COG8          |
| YNL058C                                          | YNL058C       | YLR320W                 | MMS22         |
| YDR293C                                          | SSD1          | YER122C                 | GLO3          |
| YGL147C                                          | RPL9A         | YPR036W                 | VMA13         |
| YLR386W                                          | VAC14         | YMR109W                 | MYO5          |
| YKL126W                                          | YPK1          | YLR094C                 | GIS3          |
| YHR060W                                          | VMA22         | YKL119C                 | VPH2          |
| YER161C                                          | SPT2          | YDR073W                 | SNF11         |
| YKL048C                                          | ELM1          | YOL121C                 | RPS19A        |
| YNL291C                                          | MID1          | YGR188C                 | BUB1          |
| YLR320W                                          | MMS22         | YOR066W                 | MSA1          |
| YFR010W                                          | UBP6          | YPL137C                 | GIP3          |
| YNL215W                                          | IES2          | YIL076W                 | SEC28         |
| YLR079W                                          | SIC1          | YLR399C                 | BDF1          |
| YDR385W                                          | EFT2          | YPR119W                 | CLB2          |
| YPL253C                                          | VIK1          | YPR051W                 | MAK3          |

| Predictions at threshold level 0.75 continued... |               |                         |               |
|--------------------------------------------------|---------------|-------------------------|---------------|
| Gene1 of predicted pair                          |               | Gene2 of predicted pair |               |
| Systematic Name                                  | Standard Name | Systematic Name         | Standard Name |
| YJL095W                                          | BCK1          | YGL124C                 | MON1          |
| YIL159W                                          | BNR1          | YBR036C                 | CSG2          |
| YIL076W                                          | SEC28         | YDR378C                 | LSM6          |
| YOR014W                                          | RTS1          | YLR032W                 | RAD5          |
| YNR052C                                          | POP2          | YLR399C                 | BDF1          |
| YPR040W                                          | TIP41         | YGL190C                 | CDC55         |
| YGR014W                                          | MSB2          | YML097C                 | VPS9          |
| YLR399C                                          | BDF1          | YNL307C                 | MCK1          |
| YHR039C-A                                        | VMA10         | YPR046W                 | MCM16         |
| YLR093C                                          | NYV1          | YGL003C                 | CDH1          |
| YAL020C                                          | ATS1          | YHR111W                 | UBA4          |
| YML095C                                          | RAD10         | YBL019W                 | APN2          |
| YLR192C                                          | HCR1          | YHR013C                 | ARD1          |
| YNL325C                                          | FIG4          | YGL115W                 | SNF4          |
| YOR132W                                          | VPS17         | YCL001W                 | RER1          |
| YLR360W                                          | VPS38         | YMR004W                 | MVP1          |
| YLR216C                                          | CPR6          | YIL133C                 | RPL16A        |
| YDL184C                                          | RPL41A        | YMR152W                 | YIM1          |
| YMR216C                                          | SKY1          | YML001W                 | YPT7          |
| YMR224C                                          | MRE11         | YDR484W                 | VPS52         |
| YDR358W                                          | GGA1          | YML097C                 | VPS9          |
| YDL184C                                          | RPL41A        | YDR310C                 | SUM1          |
| YDR378C                                          | LSM6          | YHR111W                 | UBA4          |
| YGL212W                                          | VAM7          | YHR200W                 | RPN10         |
| YKL048C                                          | ELM1          | YKL101W                 | HSL1          |
| YKR020W                                          | VPS51         | YLR309C                 | IMH1          |
| YML067C                                          | ERV41         | YEL036C                 | ANP1          |
| YLR371W                                          | ROM2          | YDR207C                 | UME6          |
| YNL248C                                          | RPA49         | YPR046W                 | MCM16         |

| Predictions at threshold level 0.75 continued... |               |                         |               |
|--------------------------------------------------|---------------|-------------------------|---------------|
| Gene1 of predicted pair                          |               | Gene2 of predicted pair |               |
| Systematic Name                                  | Standard Name | Systematic Name         | Standard Name |
| YMR198W                                          | CIK1          | YBR200W                 | BEM1          |
| YBR108W                                          | YBR108W       | YBR200W                 | BEM1          |
| YAL024C                                          | LTE1          | YDR076W                 | RAD55         |
| YLR006C                                          | SSK1          | YPL161C                 | BEM4          |
| YLR144C                                          | ACF2          | YKR030W                 | GMH1          |
| YJL138C                                          | TIF2          | YMR167W                 | MLH1          |
| YOR112W                                          | CEX1          | YKR001C                 | VPS1          |
| YIL053W                                          | RHR2          | YFR010W                 | UBP6          |
| YMR198W                                          | CIK1          | YGR184C                 | UBR1          |
| YML115C                                          | VAN1          | YDR385W                 | EFT2          |
| YKL048C                                          | ELM1          | YNL116W                 | DMA2          |
| YHR205W                                          | SCH9          | YLR200W                 | YKE2          |
| YGL033W                                          | HOP2          | YOL121C                 | RPS19A        |
| YLR360W                                          | VPS38         | YGL115W                 | SNF4          |
| YGR104C                                          | SRB5          | YPR120C                 | CLB5          |
| YMR142C                                          | RPL13B        | YBR108W                 | YBR108W       |
| YBR215W                                          | HPC2          | YDR207C                 | UME6          |
| YLR441C                                          | RPS1A         | YLR370C                 | ARC18         |
| YHR111W                                          | UBA4          | YDR264C                 | AKR1          |
| YMR109W                                          | MYO5          | YPR119W                 | CLB2          |
| YNL248C                                          | RPA49         | YPL152W                 | RRD2          |
| YFR036W                                          | CDC26         | YOR035C                 | SHE4          |
| YBR188C                                          | NTC20         | YPR101W                 | SNT309        |
| YKL139W                                          | CTK1          | YMR142C                 | RPL13B        |
| YLR441C                                          | RPS1A         | YCR053W                 | THR4          |
| YBR194W                                          | SOY1          | YPL022W                 | RAD1          |
| YDR358W                                          | GGA1          | YBR036C                 | CSG2          |
| YNL325C                                          | FIG4          | YER122C                 | GLO3          |
| YLR386W                                          | VAC14         | YJR056C                 | YJR056C       |

| Predictions at threshold level 0.75 continued... |               |                         |               |
|--------------------------------------------------|---------------|-------------------------|---------------|
| Gene1 of predicted pair                          |               | Gene2 of predicted pair |               |
| Systematic Name                                  | Standard Name | Systematic Name         | Standard Name |
| YDR080W                                          | VPS41         | YDL226C                 | GCS1          |
| YFL047W                                          | RGD2          | YML057W                 | CMP2          |
| YJL124C                                          | LSM1          | YDL047W                 | SIT4          |
| YML071C                                          | COG8          | YML097C                 | VPS9          |
| YLR095C                                          | IOC2          | YNL032W                 | SIW14         |
| YLR288C                                          | MEC3          | YKL114C                 | APN1          |
| YNL218W                                          | MGS1          | YJR140C                 | HIR3          |
| YLR435W                                          | TSR2          | YGL189C                 | RPS26A        |
| YJL124C                                          | LSM1          | YPR046W                 | MCM16         |
| YKR072C                                          | SIS2          | YMR116C                 | ASC1          |
| YOR038C                                          | HIR2          | YOR141C                 | ARP8          |
| YGR261C                                          | APL6          | YOR127W                 | RGA1          |
| YDL006W                                          | PTC1          | YML071C                 | COG8          |
| YJL154C                                          | VPS35         | YER114C                 | BOI2          |
| YJR090C                                          | GRR1          | YLR352W                 | YLR352W       |
| YLR362W                                          | STE11         | YPR119W                 | CLB2          |
| YDR477W                                          | SNF1          | YMR214W                 | SCJ1          |
| YLR360W                                          | VPS38         | YER122C                 | GLO3          |
| YLR452C                                          | SST2          | YOL121C                 | RPS19A        |
| YHR134W                                          | WSS1          | YOR127W                 | RGA1          |
| YFR010W                                          | UBP6          | YDR440W                 | DOT1          |
| YNL054W                                          | VAC7          | YJR063W                 | RPA12         |
| YKL010C                                          | UFD4          | YNL079C                 | TPM1          |
| YBL079W                                          | NUP170        | YPL246C                 | RBD2          |
| YNL291C                                          | MID1          | YGR217W                 | CCH1          |
| YLR170C                                          | APS1          | YDL006W                 | PTC1          |
| YGR129W                                          | SYF2          | YIR009W                 | MSL1          |
| YMR153W                                          | NUP53         | YOR066W                 | MSA1          |
| YGR020C                                          | VMA7          | YHR060W                 | VMA22         |

| Predictions at threshold level 0.75 continued... |               |                         |               |
|--------------------------------------------------|---------------|-------------------------|---------------|
| Gene1 of predicted pair                          |               | Gene2 of predicted pair |               |
| Systematic Name                                  | Standard Name | Systematic Name         | Standard Name |
| YNL291C                                          | MID1          | YDR318W                 | MCM21         |
| YDR179C                                          | CSN9          | YMR025W                 | CSI1          |
| YFR010W                                          | UBP6          | YEL060C                 | PRB1          |
| YMR142C                                          | RPL13B        | YDR261C                 | EXG2          |
| YKL160W                                          | ELF1          | YLR350W                 | ORM2          |
| YPL137C                                          | GIP3          | YMR152W                 | YIM1          |
| YKL048C                                          | ELM1          | YDR028C                 | REG1          |
| YDR225W                                          | HTA1          | YPL001W                 | HAT1          |
| YGL100W                                          | SEH1          | YKL057C                 | NUP120        |
| YLR452C                                          | SST2          | YLR370C                 | ARC18         |
| YKL139W                                          | CTK1          | YBL025W                 | RRN10         |
| YDR156W                                          | RPA14         | YPL161C                 | BEM4          |
| YDL002C                                          | NHP10         | YGL148W                 | ARO2          |
| YMR216C                                          | SKY1          | YJR033C                 | RAV1          |
| YGR184C                                          | UBR1          | YML028W                 | TSA1          |
| YDR004W                                          | RAD57         | YLR032W                 | RAD5          |
| YMR026C                                          | PEX12         | YBL025W                 | RRN10         |
| YLR148W                                          | PEP3          | YOR035C                 | SHE4          |
| YKL048C                                          | ELM1          | YDR309C                 | GIC2          |
| YEL053C                                          | MAK10         | YDR358W                 | GGA1          |
| YGL033W                                          | HOP2          | YDR358W                 | GGA1          |
| YGL223C                                          | COG1          | YOR036W                 | PEP12         |
| YKR035W-A                                        | DID2          | YOL121C                 | RPS19A        |
| YMR038C                                          | CCS1          | YLR182W                 | SWI6          |
| YDR101C                                          | ARX1          | YBR031W                 | RPL4A         |
| YBL058W                                          | SHP1          | YGR249W                 | MGA1          |
| YDR216W                                          | ADR1          | YMR280C                 | CAT8          |
| YDL002C                                          | NHP10         | YER122C                 | GLO3          |
| YLR360W                                          | VPS38         | YOR023C                 | AHC1          |

| Predictions at threshold level 0.75 continued... |               |                         |               |
|--------------------------------------------------|---------------|-------------------------|---------------|
| Gene1 of predicted pair                          |               | Gene2 of predicted pair |               |
| Systematic Name                                  | Standard Name | Systematic Name         | Standard Name |
| YBR020W                                          | GAL1          | YML051W                 | GAL80         |
| YDR146C                                          | SWI5          | YER049W                 | TPA1          |
| YJL124C                                          | LSM1          | YPR101W                 | SNT309        |
| YMR224C                                          | MRE11         | YLR018C                 | POM34         |
| YMR224C                                          | MRE11         | YCR077C                 | PAT1          |
| YDR260C                                          | SWM1          | YJL095W                 | BCK1          |
| YGR200C                                          | ELP2          | YHR187W                 | IKI1          |
| YNL087W                                          | TCB2          | YGL124C                 | MON1          |
| YOR109W                                          | INP53         | YHL020C                 | OPI1          |
| YPL037C                                          | EGD1          | YER162C                 | RAD4          |
| YDL155W                                          | CLB3          | YJL183W                 | MNN11         |
| YLR079W                                          | SIC1          | YGL163C                 | RAD54         |
| YJR056C                                          | YJR056C       | YNR072W                 | HXT17         |
| YGR261C                                          | APL6          | YOR106W                 | VAM3          |
| YGR072W                                          | UPF3          | YKR030W                 | GMH1          |
| YDR448W                                          | ADA2          | YBR089C-A               | NHP6B         |
| YIL159W                                          | BNR1          | YJL187C                 | SWE1          |
| YJL004C                                          | SYS1          | YMR054W                 | STV1          |
| YGL223C                                          | COG1          | YGL054C                 | ERV14         |
| YPL256C                                          | CLN2          | YOR014W                 | RTS1          |
| YOR358W                                          | HAP5          | YDR144C                 | MKC7          |
| YMR142C                                          | RPL13B        | YPR036W                 | VMA13         |
| YBR228W                                          | SLX1          | YLR313C                 | SPH1          |
| YFR024C-A                                        | LSB3          | YMR192W                 | GYL1          |
| YMR116C                                          | ASC1          | YPL096C-A               | ERI1          |
| YFR031C-A                                        | RPL2A         | YPR036W                 | VMA13         |
| YDR309C                                          | GIC2          | YJL187C                 | SWE1          |
| YLR093C                                          | NYV1          | YMR311C                 | GLC8          |
| YDR477W                                          | SNF1          | YLR425W                 | TUS1          |

| Predictions at threshold level 0.75 continued... |               |                         |               |
|--------------------------------------------------|---------------|-------------------------|---------------|
| Gene1 of predicted pair                          |               | Gene2 of predicted pair |               |
| Systematic Name                                  | Standard Name | Systematic Name         | Standard Name |
| YPL253C                                          | VIK1          | YGL253W                 | HXK2          |
| YBL058W                                          | SHP1          | YMR142C                 | RPL13B        |
| YNL094W                                          | APP1          | YLR433C                 | CNA1          |
| YDR144C                                          | MKC7          | YHR114W                 | BZZ1          |
| YPR018W                                          | RLF2          | YGR184C                 | UBR1          |
| YNL135C                                          | FPR1          | YGL124C                 | MON1          |
| YCR086W                                          | CSM1          | YJL190C                 | RPS22A        |
| YCR077C                                          | PAT1          | YDR289C                 | RTT103        |
| YBR030W                                          | YBR030W       | YDL077C                 | VAM6          |
| YDR174W                                          | HMO1          | YPR119W                 | CLB2          |
| YGR261C                                          | APL6          | YNL107W                 | YAF9          |
| YCR086W                                          | CSM1          | YGL252C                 | RTG2          |
| YPR084W                                          | YPR084W       | YPL042C                 | SSN3          |
| YNL107W                                          | YAF9          | YKL114C                 | APN1          |
| YER162C                                          | RAD4          | YEL051W                 | VMA8          |
| YMR153W                                          | NUP53         | YML057W                 | CMP2          |
| YOR127W                                          | RGA1          | YKR057W                 | RPS21A        |
| YIL008W                                          | URM1          | YDL006W                 | PTC1          |
| YEL065W                                          | SIT1          | YLR119W                 | SRN2          |
| YHR200W                                          | RPN10         | YPL161C                 | BEM4          |
| YNR052C                                          | POP2          | YLR254C                 | NDL1          |
| YFR031C-A                                        | RPL2A         | YML115C                 | VAN1          |
| YER087C-B                                        | SBH1          | YHR200W                 | RPN10         |
| YIL036W                                          | CST6          | YNL107W                 | YAF9          |
| YHR200W                                          | RPN10         | YDR318W                 | MCM21         |
| YFR031C-A                                        | RPL2A         | YJL095W                 | BCK1          |
| YDR484W                                          | VPS52         | YPL057C                 | SUR1          |
| YFL023W                                          | BUD27         | YLR180W                 | SAM1          |
| YBR173C                                          | UMP1          | YHR056C                 | RSC30         |

| Predictions at threshold level 0.75 continued... |               |                         |               |
|--------------------------------------------------|---------------|-------------------------|---------------|
| Gene1 of predicted pair                          |               | Gene2 of predicted pair |               |
| Systematic Name                                  | Standard Name | Systematic Name         | Standard Name |
| YCL001W                                          | RER1          | YNL051W                 | COG5          |
| YJL029C                                          | VPS53         | YOR327C                 | SNC2          |
| YJL006C                                          | CTK2          | YLR370C                 | ARC18         |
| YNL215W                                          | IES2          | YFR036W                 | CDC26         |
| YML115C                                          | VAN1          | YMR152W                 | YIM1          |
| YKR001C                                          | VPS1          | YDR358W                 | GGA1          |
| YDL116W                                          | NUP84         | YPL022W                 | RAD1          |
| YCR020C-A                                        | MAK31         | YGR072W                 | UPF3          |
| YDR004W                                          | RAD57         | YOR014W                 | RTS1          |
| YML115C                                          | VAN1          | YLR131C                 | ACE2          |
| YLR079W                                          | SIC1          | YPR111W                 | DBF20         |
| YOR358W                                          | HAP5          | YPL161C                 | BEM4          |
| YPL137C                                          | GIP3          | YNL076W                 | MKS1          |
| YJR040W                                          | GEF1          | YML071C                 | COG8          |
| YLR386W                                          | VAC14         | YDR254W                 | CHL4          |
| YDR146C                                          | SWI5          | YMR199W                 | CLN1          |
| YDR379W                                          | RGA2          | YKL048C                 | ELM1          |
| YKL048C                                          | ELM1          | YEL056W                 | HAT2          |
| YOR127W                                          | RGA1          | YGR152C                 | RSR1          |
| YBL008W                                          | HIR1          | YLR288C                 | MEC3          |
| YCR066W                                          | RAD18         | YHR039C-A               | VMA10         |
| YLR135W                                          | SLX4          | YOL030W                 | GAS5          |
| YBR200W                                          | BEM1          | YLR362W                 | STE11         |
| YDR080W                                          | VPS41         | YCL037C                 | SRO9          |
| YDL059C                                          | RAD59         | YLR032W                 | RAD5          |
| YDR363W-A                                        | SEM1          | YMR038C                 | CCS1          |
| YBR289W                                          | SNF5          | YER068W                 | MOT2          |
| YNR052C                                          | POP2          | YDR254W                 | CHL4          |
| YPR089W                                          | YPR089W       | YOR275C                 | RIM20         |



| Predictions at threshold level 0.75 continued... |               |                         |               |
|--------------------------------------------------|---------------|-------------------------|---------------|
| Gene1 of predicted pair                          |               | Gene2 of predicted pair |               |
| Systematic Name                                  | Standard Name | Systematic Name         | Standard Name |
| YJL183W                                          | MNN11         | YMR089C                 | YTA12         |
| YCR053W                                          | THR4          | YOL081W                 | IRA2          |
| YNL058C                                          | YNL058C       | YLR398C                 | SKI2          |
| YMR032W                                          | HOF1          | YJR090C                 | GRR1          |
| YKL025C                                          | PAN3          | YCR086W                 | CSM1          |
| YGR249W                                          | MGA1          | YLR386W                 | VAC14         |
| YNL238W                                          | KEX2          | YAR014C                 | BUD14         |
| YML095C                                          | RAD10         | YBL047C                 | EDE1          |
| YGL078C                                          | DBP3          | YDR261C                 | EXG2          |
| YHR012W                                          | VPS29         | YGL253W                 | HXK2          |
| YBL008W                                          | HIR1          | YKL109W                 | HAP4          |
| YLR386W                                          | VAC14         | YLR182W                 | SWI6          |
| YHL020C                                          | OPI1          | YOL108C                 | INO4          |
| YIL076W                                          | SEC28         | YBR200W                 | BEM1          |
| YNL069C                                          | RPL16B        | YGR261C                 | APL6          |
| YMR116C                                          | ASC1          | YPL089C                 | RLM1          |
| YMR016C                                          | SOK2          | YMR152W                 | YIM1          |
| YDR443C                                          | SSN2          | YDL005C                 | MED2          |
| YPL129W                                          | TAF14         | YOR141C                 | ARP8          |
| YAR014C                                          | BUD14         | YAL002W                 | VPS8          |
| YGL212W                                          | VAM7          | YHR039C-A               | VMA10         |
| YOR112W                                          | CEX1          | YJR033C                 | RAV1          |
| YKL116C                                          | PRR1          | YBR200W                 | BEM1          |
| YKL025C                                          | PAN3          | YDR144C                 | MKC7          |
| YGL178W                                          | MPT5          | YBL016W                 | FUS3          |
| YIL076W                                          | SEC28         | YMR142C                 | RPL13B        |
| YAL024C                                          | LTE1          | YJL187C                 | SWE1          |
| YLL039C                                          | UBI4          | YER001W                 | MNN1          |
| YLR119W                                          | SRN2          | YHR200W                 | RPN10         |

| Predictions at threshold level 0.75 continued... |               |                         |               |
|--------------------------------------------------|---------------|-------------------------|---------------|
| Gene1 of predicted pair                          |               | Gene2 of predicted pair |               |
| Systematic Name                                  | Standard Name | Systematic Name         | Standard Name |
| YOL145C                                          | CTR9          | YPL248C                 | GAL4          |
| YER162C                                          | RAD4          | YOL108C                 | INO4          |
| YLR320W                                          | MMS22         | YDR207C                 | UME6          |
| YDR176W                                          | NGG1          | YPL129W                 | TAF14         |
| YPL152W                                          | RRD2          | YML112W                 | CTK3          |
| YDR225W                                          | HTA1          | YOR039W                 | CKB2          |
| YDR129C                                          | SAC6          | YLR370C                 | ARC18         |
| YPL152W                                          | RRD2          | YLR315W                 | NKP2          |
| YLR337C                                          | VRP1          | YMR198W                 | CIK1          |
| YDR480W                                          | DIG2          | YPL256C                 | CLN2          |
| YMR071C                                          | TVP18         | YAR014C                 | BUD14         |
| YLR386W                                          | VAC14         | YMR127C                 | SAS2          |
| YGR105W                                          | VMA21         | YNL051W                 | COG5          |
| YDR310C                                          | SUM1          | YJR035W                 | RAD26         |
| YLR386W                                          | VAC14         | YOL145C                 | CTR9          |
| YDR004W                                          | RAD57         | YHR079C-A               | SAE3          |
| YML117W                                          | NAB6          | YMR205C                 | PFK2          |
| YNL238W                                          | KEX2          | YPL137C                 | GIP3          |
| YKL010C                                          | UFD4          | YKL032C                 | IXR1          |
| YLR090W                                          | XDJ1          | YMR016C                 | SOK2          |
| YML117W                                          | NAB6          | YJL117W                 | PHO86         |
| YJL172W                                          | CPS1          | YER040W                 | GLN3          |
| YMR153W                                          | NUP53         | YPR036W                 | VMA13         |
| YKR020W                                          | VPS51         | YGR135W                 | PRE9          |
| YCR034W                                          | FEN1          | YLR350W                 | ORM2          |
| YOR185C                                          | GSP2          | YER110C                 | KAP123        |
| YMR055C                                          | BUB2          | YNL107W                 | YAF9          |
| YBR030W                                          | YBR030W       | YOL111C                 | MDY2          |
| YBR217W                                          | ATG12         | YBL025W                 | RRN10         |

| Predictions at threshold level 0.75 continued... |               |                         |               |
|--------------------------------------------------|---------------|-------------------------|---------------|
| Gene1 of predicted pair                          |               | Gene2 of predicted pair |               |
| Systematic Name                                  | Standard Name | Systematic Name         | Standard Name |
| YPL024W                                          | RMI1          | YKR072C                 | SIS2          |
| YFR031C-A                                        | RPL2A         | YHL020C                 | OPI1          |
| YMR199W                                          | CLN1          | YHR012W                 | VPS29         |
| YER144C                                          | UBP5          | YNL076W                 | MKS1          |
| YHR156C                                          | LIN1          | YKL116C                 | PRR1          |
| YDL106C                                          | PHO2          | YFR034C                 | PHO4          |
| YBR127C                                          | VMA2          | YDL185W                 | TFP1          |
| YCR002C                                          | CDC10         | YHR061C                 | GIC1          |
| YHR156C                                          | LIN1          | YDR137W                 | RGP1          |
| YPL024W                                          | RMI1          | YOR066W                 | MSA1          |
| YNL116W                                          | DMA2          | YNL107W                 | YAF9          |
| YOL121C                                          | RPS19A        | YDR310C                 | SUM1          |
| YDL020C                                          | RPN4          | YJL183W                 | MNN11         |
| YNL199C                                          | GCR2          | YJL095W                 | BCK1          |
| YEL009C                                          | GCN4          | YOR038C                 | HIR2          |
| YJL036W                                          | SNX4          | YGL223C                 | COG1          |
| YKR099W                                          | BAS1          | YNL307C                 | MCK1          |
| YMR198W                                          | CIK1          | YML028W                 | TSA1          |
| YLR386W                                          | VAC14         | YBR114W                 | RAD16         |
| YOR132W                                          | VPS17         | YJR135C                 | MCM22         |
| YDR310C                                          | SUM1          | YNL107W                 | YAF9          |
| YNL215W                                          | IES2          | YGL252C                 | RTG2          |
| YHR119W                                          | SET1          | YLR330W                 | CHS5          |
| YOR038C                                          | HIR2          | YBR036C                 | CSG2          |
| YDR378C                                          | LSM6          | YAL002W                 | VPS8          |
| YMR055C                                          | BUB2          | YLR410W                 | VIP1          |
| YKL025C                                          | PAN3          | YDR310C                 | SUM1          |
| YCR081W                                          | SRB8          | YPL248C                 | GAL4          |
| YBL003C                                          | HTA2          | YNL030W                 | HHF2          |

| Predictions at threshold level 0.75 continued... |               |                         |               |
|--------------------------------------------------|---------------|-------------------------|---------------|
| Gene1 of predicted pair                          |               | Gene2 of predicted pair |               |
| Systematic Name                                  | Standard Name | Systematic Name         | Standard Name |
| YDR261C                                          | EXG2          | YPL137C                 | GIP3          |
| YKR099W                                          | BAS1          | YER044C                 | ERG28         |
| YHL031C                                          | GOS1          | YIR005W                 | IST3          |
| YBR171W                                          | SEC66         | YML012W                 | ERV25         |
| YPL161C                                          | BEM4          | YGR105W                 | VMA21         |
| YNL238W                                          | KEX2          | YDR358W                 | GGA1          |
| YIR002C                                          | MPH1          | YLR234W                 | TOP3          |
| YNL201C                                          | PSY2          | YDR439W                 | LRS4          |
| YJL151C                                          | SNA3          | YKR030W                 | GMH1          |
| YGL212W                                          | VAM7          | YML071C                 | COG8          |
| YPL240C                                          | HSP82         | YGL189C                 | RPS26A        |
| YGR004W                                          | PEX31         | YMR204C                 | INP1          |
| YLR429W                                          | CRN1          | YLR410W                 | VIP1          |
| YJR063W                                          | RPA12         | YOR141C                 | ARP8          |
| YPL050C                                          | MNN9          | YKR020W                 | VPS51         |
| YOR008C                                          | SLG1          | YDR207C                 | UME6          |
| YFL013C                                          | IES1          | YCR077C                 | PAT1          |
| YJL036W                                          | SNX4          | YCL001W                 | RER1          |
| YPL037C                                          | EGD1          | YLR309C                 | IMH1          |
| YJL172W                                          | CPS1          | YER144C                 | UBP5          |
| YDR378C                                          | LSM6          | YLR429W                 | CRN1          |
| YBR108W                                          | YBR108W       | YOL121C                 | RPS19A        |
| YGR261C                                          | APL6          | YGR020C                 | VMA7          |
| YJR021C                                          | REC107        | YBR119W                 | MUD1          |
| YLR119W                                          | SRN2          | YOR290C                 | SNF2          |
| YLR453C                                          | RIF2          | YBR275C                 | RIF1          |
| YLR386W                                          | VAC14         | YNL087W                 | TCB2          |
| YOR066W                                          | MSA1          | YPR030W                 | CSR2          |
| YLR240W                                          | VPS34         | YDR484W                 | VPS52         |

| Predictions at threshold level 0.75 continued... |               |                         |               |
|--------------------------------------------------|---------------|-------------------------|---------------|
| Gene1 of predicted pair                          |               | Gene2 of predicted pair |               |
| Systematic Name                                  | Standard Name | Systematic Name         | Standard Name |
| YFL013C                                          | IES1          | YOR080W                 | DIA2          |
| YGL147C                                          | RPL9A         | YGL078C                 | DBP3          |
| YLR083C                                          | EMP70         | YOL018C                 | TLG2          |
| YPL024W                                          | RMI1          | YDR477W                 | SNF1          |
| YFR031C-A                                        | RPL2A         | YJR084W                 | CSN12         |
| YDR329C                                          | PEX3          | YPL112C                 | PEX25         |
| YMR054W                                          | STV1          | YDR207C                 | UME6          |
| YJR090C                                          | GRR1          | YGL253W                 | HXK2          |
| YML115C                                          | VAN1          | YPL137C                 | GIP3          |
| YHL020C                                          | OPI1          | YDR207C                 | UME6          |
| YDR225W                                          | HTA1          | YDL013W                 | SLX5          |
| YER122C                                          | GLO3          | YKL119C                 | VPH2          |
| YLR313C                                          | SPH1          | YJL095W                 | BCK1          |
| YLR435W                                          | TSR2          | YCR031C                 | RPS14A        |
| YOR076C                                          | SKI7          | YHR134W                 | WSS1          |
| YPL037C                                          | EGD1          | YJR033C                 | RAV1          |
| YBR107C                                          | IML3          | YHR114W                 | BZZ1          |
| YML115C                                          | VAN1          | YPL037C                 | EGD1          |
| YPL022W                                          | RAD1          | YBR107C                 | IML3          |
| YNL218W                                          | MGS1          | YCL037C                 | SRO9          |
| YKL129C                                          | MYO3          | YCR088W                 | ABP1          |
| YOL054W                                          | PSH1          | YAR014C                 | BUD14         |
| YLR094C                                          | GIS3          | YDL192W                 | ARF1          |
| YOR275C                                          | RIM20         | YKR020W                 | VPS51         |
| YKR072C                                          | SIS2          | YML028W                 | TSA1          |
| YBR200W                                          | BEM1          | YKR001C                 | VPS1          |
| YNL288W                                          | CAF40         | YJL190C                 | RPS22A        |
| YBR258C                                          | SHG1          | YDR440W                 | DOT1          |
| YFL013C                                          | IES1          | YER161C                 | SPT2          |

| Predictions at threshold level 0.75 continued... |               |                         |               |
|--------------------------------------------------|---------------|-------------------------|---------------|
| Gene1 of predicted pair                          |               | Gene2 of predicted pair |               |
| Systematic Name                                  | Standard Name | Systematic Name         | Standard Name |
| YMR004W                                          | MVP1          | YCL037C                 | SRO9          |
| YDR456W                                          | NHX1          | YBR260C                 | RGD1          |
| YCR077C                                          | PAT1          | YBR036C                 | CSG2          |
| YPR049C                                          | ATG11         | YPR185W                 | ATG13         |
| YPR018W                                          | RLF2          | YNL291C                 | MID1          |
| YLR090W                                          | XDJ1          | YGL033W                 | HOP2          |
| YNL201C                                          | PSY2          | YDR156W                 | RPA14         |
| YDR225W                                          | HTA1          | YDR254W                 | CHL4          |
| YKL007W                                          | CAP1          | YPL161C                 | BEM4          |
| YKR061W                                          | KTR2          | YKL048C                 | ELM1          |
| YHR156C                                          | LIN1          | YHR200W                 | RPN10         |
| YNL243W                                          | SLA2          | YJL115W                 | ASF1          |
| YML115C                                          | VAN1          | YPL057C                 | SUR1          |
| YHR079C                                          | IRE1          | YPL248C                 | GAL4          |
| YML016C                                          | PPZ1          | YLR435W                 | TSR2          |
| YPL161C                                          | BEM4          | YEL043W                 | YEL043W       |
| YDL083C                                          | RPS16B        | YLR093C                 | NYV1          |
| YLR094C                                          | GIS3          | YMR133W                 | REC114        |
| YBL088C                                          | TEL1          | YKL048C                 | ELM1          |
| YHR156C                                          | LIN1          | YLR371W                 | ROM2          |
| YNR052C                                          | POP2          | YFR036W                 | CDC26         |
| YEL050C                                          | RML2          | YMR179W                 | SPT21         |
| YMR224C                                          | MRE11         | YJR063W                 | RPA12         |
| YBR009C                                          | HHF1          | YPR119W                 | CLB2          |
| YIL159W                                          | BNR1          | YCL027W                 | FUS1          |
| YLR452C                                          | SST2          | YBL025W                 | RRN10         |
| YPL096C-A                                        | ERI1          | YOR035C                 | SHE4          |
| YNL243W                                          | SLA2          | YEL003W                 | GIM4          |
| YKL160W                                          | ELF1          | YOR038C                 | HIR2          |

| Predictions at threshold level 0.75 continued... |               |                         |               |
|--------------------------------------------------|---------------|-------------------------|---------------|
| Gene1 of predicted pair                          |               | Gene2 of predicted pair |               |
| Systematic Name                                  | Standard Name | Systematic Name         | Standard Name |
| YLR320W                                          | MMS22         | YER040W                 | GLN3          |
| YCR065W                                          | HCM1          | YOR195W                 | SLK19         |
| YBL047C                                          | EDE1          | YNL116W                 | DMA2          |
| YHR200W                                          | RPN10         | YEL053C                 | MAK10         |
| YNL025C                                          | SSN8          | YDL005C                 | MED2          |
| YNL106C                                          | INP52         | YIR009W                 | MSL1          |
| YLR371W                                          | ROM2          | YDL192W                 | ARF1          |
| YBL087C                                          | RPL23A        | YPR119W                 | CLB2          |
| YGR184C                                          | UBR1          | YPR120C                 | CLB5          |
| YLR292C                                          | SEC72         | YDR183W                 | PLP1          |
| YGR217W                                          | CCH1          | YPL161C                 | BEM4          |
| YLR381W                                          | CTF3          | YDR200C                 | VPS64         |
| YLL039C                                          | UBI4          | YPL256C                 | CLN2          |
| YDR137W                                          | RGP1          | YDR261C                 | EXG2          |
| YDR335W                                          | MSN5          | YPL152W                 | RRD2          |
| YNL248C                                          | RPA49         | YKL110C                 | KTI12         |
| YHR111W                                          | UBA4          | YKL110C                 | KTI12         |
| YOR140W                                          | SFL1          | YPL161C                 | BEM4          |
| YKL006W                                          | RPL14A        | YML115C                 | VAN1          |
| YPL024W                                          | RMI1          | YLR093C                 | NYV1          |
| YLR315W                                          | NKP2          | YDR183W                 | PLP1          |
| YML016C                                          | PPZ1          | YOR141C                 | ARP8          |
| YOR332W                                          | VMA4          | YBR127C                 | VMA2          |
| YNL107W                                          | YAF9          | YNL030W                 | HHF2          |
| YPL042C                                          | SSN3          | YLR182W                 | SWI6          |
| YLR371W                                          | ROM2          | YOL121C                 | RPS19A        |
| YMR152W                                          | YIM1          | YOR035C                 | SHE4          |
| YLR410W                                          | VIP1          | YDL155W                 | CLB3          |
| YLR360W                                          | VPS38         | YJR060W                 | CBF1          |

| Predictions at threshold level 0.75 continued... |               |                         |               |
|--------------------------------------------------|---------------|-------------------------|---------------|
| Gene1 of predicted pair                          |               | Gene2 of predicted pair |               |
| Systematic Name                                  | Standard Name | Systematic Name         | Standard Name |
| YOL126C                                          | MDH2          | YNR065C                 | YNR065C       |
| YGL054C                                          | ERV14         | YJL004C                 | SYS1          |
| YGL016W                                          | KAP122        | YGR059W                 | SPR3          |
| YNL206C                                          | RTT106        | YKL048C                 | ELM1          |
| YPR017C                                          | DSS4          | YOR106W                 | VAM3          |
| YPR029C                                          | APL4          | YOR109W                 | INP53         |
| YKL007W                                          | CAP1          | YBR171W                 | SEC66         |
| YLR386W                                          | VAC14         | YNL297C                 | MON2          |
| YHL031C                                          | GOS1          | YDR108W                 | GSG1          |
| YNL058C                                          | YNL058C       | YMR214W                 | SCJ1          |
| YKL048C                                          | ELM1          | YGR135W                 | PRE9          |
| YDL080C                                          | THI3          | YGL161C                 | YIP5          |
| YKL116C                                          | PRR1          | YLR094C                 | GIS3          |
| YDL101C                                          | DUN1          | YLR234W                 | TOP3          |
| YML117W                                          | NAB6          | YBL101C                 | ECM21         |
| YAR014C                                          | BUD14         | YNR032W                 | PPG1          |
| YPL129W                                          | TAF14         | YFR034C                 | PHO4          |
| YMR224C                                          | MRE11         | YKR061W                 | KTR2          |
| YGR020C                                          | VMA7          | YKL080W                 | VMA5          |
| YOR066W                                          | MSA1          | YER122C                 | GLO3          |
| YJR056C                                          | YJR056C       | YLR370C                 | ARC18         |
| YHR178W                                          | STB5          | YDR146C                 | SWI5          |
| YER044C                                          | ERG28         | YHR039C-A               | VMA10         |
| YOR308C                                          | SNU66         | YHR167W                 | THP2          |
| YNL293W                                          | MSB3          | YCR077C                 | PAT1          |
| YLR381W                                          | CTF3          | YDR171W                 | HSP42         |
| YJR056C                                          | YJR056C       | YFR036W                 | CDC26         |
| YBL103C                                          | RTG3          | YLR180W                 | SAM1          |
| YOR216C                                          | RUD3          | YEL022W                 | GEA2          |



| Predictions at threshold level 0.75 continued... |               |                         |               |
|--------------------------------------------------|---------------|-------------------------|---------------|
| Gene1 of predicted pair                          |               | Gene2 of predicted pair |               |
| Systematic Name                                  | Standard Name | Systematic Name         | Standard Name |
| YLR386W                                          | VAC14         | YOR275C                 | RIM20         |
| YMR080C                                          | NAM7          | YOR191W                 | RIS1          |
| YDL020C                                          | RPN4          | YBR200W                 | BEM1          |
| YLR093C                                          | NYV1          | YLR370C                 | ARC18         |
| YLR090W                                          | XDJ1          | YER044C                 | ERG28         |
| YOR112W                                          | CEX1          | YJR040W                 | GEF1          |
| YDR108W                                          | GSG1          | YDR318W                 | MCM21         |
| YBL025W                                          | RRN10         | YMR311C                 | GLC8          |
| YLR119W                                          | SRN2          | YMR214W                 | SCJ1          |
| YIL053W                                          | RHR2          | YKL139W                 | CTK1          |
| YDL192W                                          | ARF1          | YCR053W                 | THR4          |
| YBR290W                                          | BSD2          | YLR079W                 | SIC1          |
| YPR084W                                          | YPR084W       | YJL053W                 | PEP8          |
| YJR005W                                          | APL1          | YNL107W                 | YAF9          |
| YGL200C                                          | EMP24         | YDR440W                 | DOT1          |
| YGR184C                                          | UBR1          | YHR200W                 | RPN10         |
| YML115C                                          | VAN1          | YOR368W                 | RAD17         |
| YPL024W                                          | RMI1          | YBR057C                 | MUM2          |
| YKR035W-A                                        | DID2          | YPR173C                 | VPS4          |
| YDR363W-A                                        | SEM1          | YDR310C                 | SUM1          |
| YPL253C                                          | VIK1          | YGL151W                 | NUT1          |
| YHL031C                                          | GOS1          | YNL107W                 | YAF9          |
| YNL288W                                          | CAF40         | YJR090C                 | GRR1          |
| YPL018W                                          | CTF19         | YOL081W                 | IRA2          |
| YLR061W                                          | RPL22A        | YBR181C                 | RPS6B         |
| YML115C                                          | VAN1          | YGR020C                 | VMA7          |
| YDR378C                                          | LSM6          | YER139C                 | YER139C       |
| YBR093C                                          | PHO5          | YNR052C                 | POP2          |
| YGR072W                                          | UPF3          | YAL002W                 | VPS8          |

| Predictions at threshold level 0.75 continued... |               |                         |               |
|--------------------------------------------------|---------------|-------------------------|---------------|
| Gene1 of predicted pair                          |               | Gene2 of predicted pair |               |
| Systematic Name                                  | Standard Name | Systematic Name         | Standard Name |
| YGL115W                                          | SNF4          | YER040W                 | GLN3          |
| YOR112W                                          | CEX1          | YCL037C                 | SRO9          |
| YDR477W                                          | SNF1          | YDR245W                 | MNN10         |
| YJR063W                                          | RPA12         | YHR115C                 | DMA1          |
| YKR072C                                          | SIS2          | YPL256C                 | CLN2          |
| YJL095W                                          | BCK1          | YNL076W                 | MKS1          |
| YMR192W                                          | GYL1          | YHR016C                 | YSC84         |
| YPR046W                                          | MCM16         | YBR019C                 | GAL10         |
| YNL068C                                          | FKH2          | YJL095W                 | BCK1          |
| YMR202W                                          | ERG2          | YDL047W                 | SIT4          |
| YPR040W                                          | TIP41         | YNL289W                 | PCL1          |
| YPR036W                                          | VMA13         | YDL223C                 | HBT1          |
| YKL139W                                          | CTK1          | YPL057C                 | SUR1          |
| YEL065W                                          | SIT1          | YJR056C                 | YJR056C       |
| YLR119W                                          | SRN2          | YDR358W                 | GGA1          |
| YKL010C                                          | UFD4          | YJL183W                 | MNN11         |
| YNL069C                                          | RPL16B        | YMR004W                 | MVP1          |
| YHR200W                                          | RPN10         | YPR119W                 | CLB2          |
| YAL051W                                          | OAF1          | YDL127W                 | PCL2          |
| YAL020C                                          | ATS1          | YPL161C                 | BEM4          |
| YML038C                                          | YMD8          | YKR020W                 | VPS51         |
| YGL066W                                          | SGF73         | YGR188C                 | BUB1          |
| YGR270W                                          | YTA7          | YLR254C                 | NDL1          |
| YNL087W                                          | TCB2          | YMR230W                 | RPS10B        |
| YLR079W                                          | SIC1          | YOR001W                 | RRP6          |
| YBR108W                                          | YBR108W       | YNL041C                 | COG6          |
| YLR386W                                          | VAC14         | YNL166C                 | BNI5          |
| YER116C                                          | SLX8          | YLR180W                 | SAM1          |
| YMR198W                                          | CIK1          | YFR040W                 | SAP155        |

| Predictions at threshold level 0.75 continued... |               |                         |               |
|--------------------------------------------------|---------------|-------------------------|---------------|
| Gene1 of predicted pair                          |               | Gene2 of predicted pair |               |
| Systematic Name                                  | Standard Name | Systematic Name         | Standard Name |
| YML071C                                          | COG8          | YEL051W                 | VMA8          |
| YLR386W                                          | VAC14         | YIL103W                 | DPH1          |
| YMR224C                                          | MRE11         | YGR135W                 | PRE9          |
| YGL087C                                          | MMS2          | YGL124C                 | MON1          |
| YDR443C                                          | SSN2          | YPL137C                 | GIP3          |
| YGL237C                                          | HAP2          | YNL297C                 | MON2          |
| YHR200W                                          | RPN10         | YNL041C                 | COG6          |
| YOR127W                                          | RGA1          | YHR061C                 | GIC1          |
| YNL238W                                          | KEX2          | YKL080W                 | VMA5          |
| YGL066W                                          | SGF73         | YOR368W                 | RAD17         |
| YHL031C                                          | GOS1          | YNL044W                 | YIP3          |
| YGR020C                                          | VMA7          | YJL004C                 | SYS1          |
| YLR292C                                          | SEC72         | YIL008W                 | URM1          |
| YPR036W                                          | VMA13         | YGL115W                 | SNF4          |
| YBL078C                                          | ATG8          | YGL223C                 | COG1          |
| YGL223C                                          | COG1          | YKR030W                 | GMH1          |
| YGL033W                                          | HOP2          | YBR217W                 | ATG12         |
| YNL325C                                          | FIG4          | YJL172W                 | CPS1          |
| YLR288C                                          | MEC3          | YJL124C                 | LSM1          |
| YIL036W                                          | CST6          | YLR315W                 | NKP2          |
| YGL115W                                          | SNF4          | YEL051W                 | VMA8          |
| YKL025C                                          | PAN3          | YMR055C                 | BUB2          |
| YLR254C                                          | NDL1          | YGR188C                 | BUB1          |
| YPL195W                                          | APL5          | YER139C                 | YER139C       |
| YNL325C                                          | FIG4          | YLR094C                 | GIS3          |
| YMR055C                                          | BUB2          | YNL116W                 | DMA2          |
| YJL124C                                          | LSM1          | YLR182W                 | SWI6          |
| YPR028W                                          | YOP1          | YBL106C                 | SRO77         |
| YNL218W                                          | MGS1          | YGR071C                 | YGR071C       |

| Predictions at threshold level 0.75 continued... |               |                         |               |
|--------------------------------------------------|---------------|-------------------------|---------------|
| Gene1 of predicted pair                          |               | Gene2 of predicted pair |               |
| Systematic Name                                  | Standard Name | Systematic Name         | Standard Name |
| YMR199W                                          | CLN1          | YOR368W                 | RAD17         |
| YIL076W                                          | SEC28         | YER044C                 | ERG28         |
| YKR020W                                          | VPS51         | YJL187C                 | SWE1          |
| YOR066W                                          | MSA1          | YGL003C                 | CDH1          |
| YER044C                                          | ERG28         | YPR030W                 | CSR2          |
| YDR261C                                          | EXG2          | YOL081W                 | IRA2          |
| YDR448W                                          | ADA2          | YLR182W                 | SWI6          |
| YNL288W                                          | CAF40         | YPR051W                 | MAK3          |
| YML115C                                          | VAN1          | YLR452C                 | SST2          |
| YGL135W                                          | RPL1B         | YDR385W                 | EFT2          |
| YMR198W                                          | CIK1          | YOR001W                 | RRP6          |
| YGL078C                                          | DBP3          | YLR320W                 | MMS22         |
| YMR080C                                          | NAM7          | YDL020C                 | RPN4          |
| YEL053C                                          | MAK10         | YLR093C                 | NYV1          |
| YMR095C                                          | SNO1          | YOL111C                 | MDY2          |
| YDL083C                                          | RPS16B        | YJL183W                 | MNN11         |
| YMR224C                                          | MRE11         | YBR108W                 | YBR108W       |
| YDL006W                                          | PTC1          | YNL079C                 | TPM1          |
| YKL139W                                          | CTK1          | YPL195W                 | APL5          |
| YEL065W                                          | SIT1          | YFL023W                 | BUD27         |
| YHR134W                                          | WSS1          | YGR054W                 | YGR054W       |
| YMR198W                                          | CIK1          | YPR120C                 | CLB5          |
| YLR381W                                          | CTF3          | YLR370C                 | ARC18         |
| YHR200W                                          | RPN10         | YJL095W                 | BCK1          |
| YPR052C                                          | NHP6A         | YOR008C                 | SLG1          |
| YLR447C                                          | VMA6          | YHR039C-A               | VMA10         |
| YEL044W                                          | IES6          | YFR036W                 | CDC26         |
| YKL116C                                          | PRR1          | YML115C                 | VAN1          |
| YPR017C                                          | DSS4          | YLR309C                 | IMH1          |

| Predictions at threshold level 0.75 continued... |               |                         |               |
|--------------------------------------------------|---------------|-------------------------|---------------|
| Gene1 of predicted pair                          |               | Gene2 of predicted pair |               |
| Systematic Name                                  | Standard Name | Systematic Name         | Standard Name |
| YFR010W                                          | UBP6          | YJR135C                 | MCM22         |
| YKR061W                                          | KTR2          | YDR378C                 | LSM6          |
| YNL201C                                          | PSY2          | YNL225C                 | CNM67         |
| YPL161C                                          | BEM4          | YNL293W                 | MSB3          |
| YLR090W                                          | XDJ1          | YJR056C                 | YJR056C       |
| YML095C                                          | RAD10         | YDR171W                 | HSP42         |
| YGL135W                                          | RPL1B         | YOR035C                 | SHE4          |
| YNL032W                                          | SIW14         | YER144C                 | UBP5          |
| YJL124C                                          | LSM1          | YAR014C                 | BUD14         |
| YNL069C                                          | RPL16B        | YER120W                 | SCS2          |
| YBR228W                                          | SLX1          | YDL013W                 | SLX5          |
| YDL020C                                          | RPN4          | YGR071C                 | YGR071C       |
| YPL024W                                          | RMI1          | YHR060W                 | VMA22         |
| YOR270C                                          | VPH1          | YJL172W                 | CPS1          |
| YMR016C                                          | SOK2          | YOR290C                 | SNF2          |
| YDR443C                                          | SSN2          | YBL058W                 | SHP1          |
| YDR477W                                          | SNF1          | YEL060C                 | PRB1          |
| YMR026C                                          | PEX12         | YPL195W                 | APL5          |
| YDL020C                                          | RPN4          | YNL288W                 | CAF40         |
| YFL013C                                          | IES1          | YNL215W                 | IES2          |
| YKL126W                                          | YPK1          | YJL095W                 | BCK1          |
| YPL037C                                          | EGD1          | YKR020W                 | VPS51         |
| YDR097C                                          | MSH6          | YNL307C                 | MCK1          |
| YPL022W                                          | RAD1          | YDL047W                 | SIT4          |
| YNR052C                                          | POP2          | YIR005W                 | IST3          |
| YLR090W                                          | XDJ1          | YNL307C                 | MCK1          |
| YBR108W                                          | YBR108W       | YOR327C                 | SNC2          |
| YKR031C                                          | SPO14         | YFL031W                 | HAC1          |
| YML016C                                          | PPZ1          | YDL226C                 | GCS1          |

| Predictions at threshold level 0.75 continued... |               |                         |               |
|--------------------------------------------------|---------------|-------------------------|---------------|
| Gene1 of predicted pair                          |               | Gene2 of predicted pair |               |
| Systematic Name                                  | Standard Name | Systematic Name         | Standard Name |
| YGL200C                                          | EMP24         | YJL004C                 | SYS1          |
| YDR156W                                          | RPA14         | YBR082C                 | UBC4          |
| YNL166C                                          | BNI5          | YPL161C                 | BEM4          |
| YJR056C                                          | YJR056C       | YOL121C                 | RPS19A        |
| YMR039C                                          | SUB1          | YOL081W                 | IRA2          |
| YER044C                                          | ERG28         | YER122C                 | GLO3          |
| YLR192C                                          | HCR1          | YPR036W                 | VMA13         |
| YNL087W                                          | TCB2          | YPR036W                 | VMA13         |
| YLR288C                                          | MEC3          | YGR188C                 | BUB1          |
| YDR507C                                          | GIN4          | YHR115C                 | DMA1          |
| YPL161C                                          | BEM4          | YHR115C                 | DMA1          |
| YBR264C                                          | YPT10         | YGL198W                 | YIP4          |
| YIR005W                                          | IST3          | YER139C                 | YER139C       |
| YKL110C                                          | KTI12         | YJL006C                 | CTK2          |
| YDR202C                                          | RAV2          | YPR051W                 | MAK3          |
| YJL154C                                          | VPS35         | YOR008C                 | SLG1          |
| YKL213C                                          | DOA1          | YLR350W                 | ORM2          |
| YPL253C                                          | VIK1          | YDL226C                 | GCS1          |
| YKR020W                                          | VPS51         | YDL077C                 | VAM6          |
| YDR484W                                          | VPS52         | YFR036W                 | CDC26         |
| YDL101C                                          | DUN1          | YBR082C                 | UBC4          |
| YJL187C                                          | SWE1          | YJR035W                 | RAD26         |
| YMR198W                                          | CIK1          | YGL200C                 | EMP24         |
| YGR217W                                          | CCH1          | YOR275C                 | RIM20         |
| YMR116C                                          | ASC1          | YLR371W                 | ROM2          |
| YPR046W                                          | MCM16         | YBR280C                 | SAF1          |
| YMR153W                                          | NUP53         | YFL047W                 | RGD2          |
| YGR241C                                          | YAP1802       | YGL095C                 | VPS45         |
| YBR173C                                          | UMP1          | YLR386W                 | VAC14         |

| Predictions at threshold level 0.75 continued... |               |                         |               |
|--------------------------------------------------|---------------|-------------------------|---------------|
| Gene1 of predicted pair                          |               | Gene2 of predicted pair |               |
| Systematic Name                                  | Standard Name | Systematic Name         | Standard Name |
| YMR152W                                          | YIM1          | YOL081W                 | IRA2          |
| YHR178W                                          | STB5          | YLR233C                 | EST1          |
| YPL267W                                          | ACM1          | YPL256C                 | CLN2          |
| YGL147C                                          | RPL9A         | YLR094C                 | GIS3          |
| YPR017C                                          | DSS4          | YAL002W                 | VPS8          |
| YDR443C                                          | SSN2          | YBR036C                 | CSG2          |
| YPL234C                                          | TFP3          | YOR035C                 | SHE4          |
| YLL007C                                          | YLL007C       | YMR055C                 | BUB2          |
| YBR173C                                          | UMP1          | YML071C                 | COG8          |
| YBR173C                                          | UMP1          | YDR076W                 | RAD55         |
| YOR127W                                          | RGA1          | YML016C                 | PPZ1          |
| YKR001C                                          | VPS1          | YHR012W                 | VPS29         |
| YBL072C                                          | RPS8A         | YLR425W                 | TUS1          |
| YDL113C                                          | ATG20         | YPR119W                 | CLB2          |
| YPR030W                                          | CSR2          | YJR084W                 | CSN12         |
| YOR270C                                          | VPH1          | YDR484W                 | VPS52         |
| YLR433C                                          | CNA1          | YPR101W                 | SNT309        |
| YNL309W                                          | STB1          | YPL256C                 | CLN2          |
| YIL076W                                          | SEC28         | YNL041C                 | COG6          |
| YIL034C                                          | CAP2          | YGR108W                 | CLB1          |
| YCR020W-B                                        | HTL1          | YLR357W                 | RSC2          |
| YML115C                                          | VAN1          | YLR371W                 | ROM2          |
| YNL201C                                          | PSY2          | YJL124C                 | LSM1          |
| YJL176C                                          | SWI3          | YAL055W                 | PEX22         |
| YBR127C                                          | VMA2          | YOR327C                 | SNC2          |
| YPL050C                                          | MNN9          | YKR014C                 | YPT52         |
| YCL037C                                          | SRO9          | YNL051W                 | COG5          |
| YGR104C                                          | SRB5          | YNL199C                 | GCR2          |
| YDR363W-A                                        | SEM1          | YER118C                 | SHO1          |

| Predictions at threshold level 0.75 continued... |               |                         |               |
|--------------------------------------------------|---------------|-------------------------|---------------|
| Gene1 of predicted pair                          |               | Gene2 of predicted pair |               |
| Systematic Name                                  | Standard Name | Systematic Name         | Standard Name |
| YLR234W                                          | TOP3          | YDR335W                 | MSN5          |
| YOR127W                                          | RGA1          | YNL116W                 | DMA2          |
| YNL087W                                          | TCB2          | YML001W                 | YPT7          |
| YER118C                                          | SHO1          | YKL041W                 | VPS24         |
| YLR288C                                          | MEC3          | YOL081W                 | IRA2          |
| YKL139W                                          | CTK1          | YLR452C                 | SST2          |
| YMR055C                                          | BUB2          | YAL015C                 | NTG1          |
| YMR198W                                          | CIK1          | YBR215W                 | HPC2          |
| YBL008W                                          | HIR1          | YDR448W                 | ADA2          |
| YNL307C                                          | MCK1          | YKL101W                 | HSL1          |
| YER144C                                          | UBP5          | YNR072W                 | HXT17         |
| YEL065W                                          | SIT1          | YPR036W                 | VMA13         |
| YDL116W                                          | NUP84         | YPL018W                 | CTF19         |
| YKL213C                                          | DOA1          | YNR006W                 | VPS27         |
| YLR192C                                          | HCR1          | YBR019C                 | GAL10         |
| YBR278W                                          | DPB3          | YPL001W                 | HAT1          |
| YER116C                                          | SLX8          | YOR014W                 | RTS1          |
| YBL102W                                          | SFT2          | YNL041C                 | COG6          |
| YOR069W                                          | VPS5          | YAR014C                 | BUD14         |
| YMR095C                                          | SNO1          | YNL041C                 | COG6          |
| YCR088W                                          | ABP1          | YMR231W                 | PEP5          |
| YPL178W                                          | CBC2          | YKL117W                 | SBA1          |
| YDR108W                                          | GSG1          | YML071C                 | COG8          |
| YDR080W                                          | VPS41         | YER162C                 | RAD4          |
| YLR360W                                          | VPS38         | YLR396C                 | VPS33         |
| YGL147C                                          | RPL9A         | YJL095W                 | BCK1          |
| YOR368W                                          | RAD17         | YLR370C                 | ARC18         |
| YBL008W                                          | HIR1          | YJR135C                 | MCM22         |
| YER162C                                          | RAD4          | YPL195W                 | APL5          |



| Predictions at threshold level 0.75 continued... |               |                         |               |
|--------------------------------------------------|---------------|-------------------------|---------------|
| Gene1 of predicted pair                          |               | Gene2 of predicted pair |               |
| Systematic Name                                  | Standard Name | Systematic Name         | Standard Name |
| YOR337W                                          | TEA1          | YBR108W                 | YBR108W       |
| YLR119W                                          | SRN2          | YKL041W                 | VPS24         |
| YBR194W                                          | SOY1          | YDL002C                 | NHP10         |
| YKL213C                                          | DOA1          | YMR067C                 | UBX4          |
| YLL007C                                          | YLL007C       | YGR188C                 | BUB1          |
| YPL024W                                          | RMI1          | YNL087W                 | TCB2          |
| YDL080C                                          | THI3          | YNL215W                 | IES2          |
| YGR105W                                          | VMA21         | YJL095W                 | BCK1          |
| YNL291C                                          | MID1          | YAL002W                 | VPS8          |
| YOR043W                                          | WHI2          | YKL161C                 | YKL161C       |
| YKL139W                                          | CTK1          | YOL121C                 | RPS19A        |
| YMR095C                                          | SNO1          | YBR173C                 | UMP1          |
| YKL025C                                          | PAN3          | YHR111W                 | UBA4          |
| YLR192C                                          | HCR1          | YHR039C-A               | VMA10         |
| YOR270C                                          | VPH1          | YMR311C                 | GLC8          |
| YFR010W                                          | UBP6          | YGR270W                 | YTA7          |
| YMR198W                                          | CIK1          | YNL206C                 | RTT106        |
| YNL288W                                          | CAF40         | YMR127C                 | SAS2          |
| YNL087W                                          | TCB2          | YHR081W                 | LRP1          |
| YDR507C                                          | GIN4          | YNL289W                 | PCL1          |
| YDL002C                                          | NHP10         | YER161C                 | SPT2          |
| YMR116C                                          | ASC1          | YGL031C                 | RPL24A        |
| YJL053W                                          | PEP8          | YDR080W                 | VPS41         |
| YKL116C                                          | PRR1          | YBL025W                 | RRN10         |
| YGL019W                                          | CKB1          | YOR368W                 | RAD17         |
| YDR156W                                          | RPA14         | YHR013C                 | ARD1          |
| YCR020C-A                                        | MAK31         | YJL036W                 | SNX4          |
| YNR052C                                          | POP2          | YNL054W                 | VAC7          |
| YBL058W                                          | SHP1          | YJR056C                 | YJR056C       |

| Predictions at threshold level 0.75 continued... |               |                         |               |
|--------------------------------------------------|---------------|-------------------------|---------------|
| Gene1 of predicted pair                          |               | Gene2 of predicted pair |               |
| Systematic Name                                  | Standard Name | Systematic Name         | Standard Name |
| YDR080W                                          | VPS41         | YOL108C                 | INO4          |
| YBL025W                                          | RRN10         | YDR207C                 | UME6          |
| YKL116C                                          | PRR1          | YBR217W                 | ATG12         |
| YPL120W                                          | VPS30         | YDR153C                 | ENT5          |
| YHR160C                                          | PEX18         | YMR026C                 | PEX12         |
| YOR033C                                          | EXO1          | YGR081C                 | SLX9          |
| YNL016W                                          | PUB1          | YDL013W                 | SLX5          |
| YJL154C                                          | VPS35         | YHR060W                 | VMA22         |
| YOL121C                                          | RPS19A        | YLR398C                 | SKI2          |
| YIR005W                                          | IST3          | YOL081W                 | IRA2          |
| YDR477W                                          | SNF1          | YBR280C                 | SAF1          |
| YGR252W                                          | GCN5          | YOR043W                 | WHI2          |
| YDR254W                                          | CHL4          | YMR038C                 | CCS1          |
| YAL051W                                          | OAF1          | YKL032C                 | IXR1          |
| YBR171W                                          | SEC66         | YDR261C                 | EXG2          |
| YHR098C                                          | SFB3          | YDR485C                 | VPS72         |
| YLR360W                                          | VPS38         | YHR178W                 | STB5          |
| YNL041C                                          | COG6          | YGL124C                 | MON1          |
| YJL095W                                          | BCK1          | YBL025W                 | RRN10         |
| YER118C                                          | SHO1          | YPR119W                 | CLB2          |
| YML115C                                          | VAN1          | YNL079C                 | TPM1          |
| YGR261C                                          | APL6          | YDR320C                 | SWA2          |
| YGL212W                                          | VAM7          | YPL057C                 | SUR1          |
| YDR179C                                          | CSN9          | YJR084W                 | CSN12         |
| YLR095C                                          | IOC2          | YNL076W                 | MKS1          |
| YER122C                                          | GLO3          | YNL107W                 | YAF9          |
| YGL025C                                          | PGD1          | YGL115W                 | SNF4          |
| YER044C                                          | ERG28         | YBR019C                 | GAL10         |
| YMR026C                                          | PEX12         | YER144C                 | UBP5          |

| Predictions at threshold level 0.75 continued... |               |                         |               |
|--------------------------------------------------|---------------|-------------------------|---------------|
| Gene1 of predicted pair                          |               | Gene2 of predicted pair |               |
| Systematic Name                                  | Standard Name | Systematic Name         | Standard Name |
| YBL078C                                          | ATG8          | YLL042C                 | ATG10         |
| YGR129W                                          | SYF2          | YGR006W                 | PRP18         |
| YOR078W                                          | BUD21         | YER102W                 | RPS8B         |
| YPR084W                                          | YPR084W       | YNL051W                 | COG5          |
| YIL034C                                          | CAP2          | YLR386W                 | VAC14         |
| YDL155W                                          | CLB3          | YFR036W                 | CDC26         |
| YGR105W                                          | VMA21         | YDR153C                 | ENT5          |
| YBR108W                                          | YBR108W       | YDR310C                 | SUM1          |
| YHR200W                                          | RPN10         | YPL248C                 | GAL4          |
| YER144C                                          | UBP5          | YJL183W                 | MNN11         |
| YFR031C-A                                        | RPL2A         | YEL043W                 | YEL043W       |
| YHR178W                                          | STB5          | YPR120C                 | CLB5          |
| YGL033W                                          | HOP2          | YEL060C                 | PRB1          |
| YKR035W-A                                        | DID2          | YDL083C                 | RPS16B        |
| YDR260C                                          | SWM1          | YGR188C                 | BUB1          |
| YBR111W-A                                        | SUS1          | YOR023C                 | AHC1          |
| YDL013W                                          | SLX5          | YOR014W                 | RTS1          |
| YLR083C                                          | EMP70         | YHR012W                 | VPS29         |
| YGL087C                                          | MMS2          | YBL021C                 | HAP3          |
| YJL053W                                          | PEP8          | YEL043W                 | YEL043W       |
| YEL043W                                          | YEL043W       | YPR032W                 | SRO7          |
| YBR126C                                          | TPS1          | YLR094C                 | GIS3          |
| YIL034C                                          | CAP2          | YGR152C                 | RSR1          |
| YOR337W                                          | TEA1          | YDL223C                 | HBT1          |
| YPL106C                                          | SSE1          | YJR005W                 | APL1          |
| YBL047C                                          | EDE1          | YBR260C                 | RGD1          |
| YMR153W                                          | NUP53         | YOR327C                 | SNC2          |
| YER089C                                          | PTC2          | YDL006W                 | PTC1          |
| YJL095W                                          | BCK1          | YMR038C                 | CCS1          |

| Predictions at threshold level 0.75 continued... |               |                         |               |
|--------------------------------------------------|---------------|-------------------------|---------------|
| Gene1 of predicted pair                          |               | Gene2 of predicted pair |               |
| Systematic Name                                  | Standard Name | Systematic Name         | Standard Name |
| YBL025W                                          | RRN10         | YER122C                 | GLO3          |
| YML095C                                          | RAD10         | YMR231W                 | PEP5          |
| YJR056C                                          | YJR056C       | YNL058C                 | YNL058C       |
| YLR079W                                          | SIC1          | YNL079C                 | TPM1          |
| YDR293C                                          | SSD1          | YDR153C                 | ENT5          |
| YOR132W                                          | VPS17         | YPL120W                 | VPS30         |
| YDL059C                                          | RAD59         | YDR076W                 | RAD55         |
| YNL243W                                          | SLA2          | YLR170C                 | APS1          |
| YDR378C                                          | LSM6          | YHR013C                 | ARD1          |
| YEL009C                                          | GCN4          | YPL248C                 | GAL4          |
| YLR079W                                          | SIC1          | YKL068W                 | NUP100        |
| YDR244W                                          | PEX5          | YGL205W                 | POX1          |
| YNL166C                                          | BNI5          | YDR183W                 | PLP1          |
| YNL076W                                          | MKS1          | YLR398C                 | SKI2          |
| YHR200W                                          | RPN10         | YDR207C                 | UME6          |
| YHL031C                                          | GOS1          | YKR030W                 | GMH1          |
| YNL032W                                          | SIW14         | YDR261C                 | EXG2          |
| YOR109W                                          | INP53         | YKR030W                 | GMH1          |
| YDR097C                                          | MSH6          | YMR167W                 | MLH1          |
| YPR036W                                          | VMA13         | YBR280C                 | SAF1          |
| YNR052C                                          | POP2          | YLR398C                 | SKI2          |
| YHR081W                                          | LRP1          | YBL025W                 | RRN10         |
| YPL253C                                          | VIK1          | YJR032W                 | CPR7          |
| YPL018W                                          | CTF19         | YOL067C                 | RTG1          |
| YOR270C                                          | VPH1          | YOR290C                 | SNF2          |
| YOR290C                                          | SNF2          | YDR073W                 | SNF11         |
| YLR315W                                          | NKP2          | YFR030W                 | MET10         |
| YML007W                                          | YAP1          | YKL068W                 | NUP100        |
| YPR017C                                          | DSS4          | YGL198W                 | YIP4          |

| Predictions at threshold level 0.75 continued... |               |                         |               |
|--------------------------------------------------|---------------|-------------------------|---------------|
| Gene1 of predicted pair                          |               | Gene2 of predicted pair |               |
| Systematic Name                                  | Standard Name | Systematic Name         | Standard Name |
| YFR031C-A                                        | RPL2A         | YHR200W                 | RPN10         |
| YNL243W                                          | SLA2          | YNL051W                 | COG5          |
| YLR386W                                          | VAC14         | YNL058C                 | YNL058C       |
| YIL159W                                          | BNR1          | YDR484W                 | VPS52         |
| YOR124C                                          | UBP2          | YAL002W                 | VPS8          |
| YMR311C                                          | GLC8          | YOL081W                 | IRA2          |
| YBR278W                                          | DPB3          | YGL148W                 | ARO2          |
| YGR184C                                          | UBR1          | YML051W                 | GAL80         |
| YMR153W                                          | NUP53         | YBR019C                 | GAL10         |
| YMR133W                                          | REC114        | YHR081W                 | LRP1          |
| YDL116W                                          | NUP84         | YBR082C                 | UBC4          |
| YMR008C                                          | PLB1          | YLL061W                 | MMP1          |
| YNL243W                                          | SLA2          | YOR284W                 | HUA2          |
| YAL024C                                          | LTE1          | YPL057C                 | SUR1          |
| YCR066W                                          | RAD18         | YAL002W                 | VPS8          |
| YNL069C                                          | RPL16B        | YGL115W                 | SNF4          |
| YEL013W                                          | VAC8          | YNL107W                 | YAF9          |
| YOR069W                                          | VPS5          | YDR207C                 | UME6          |
| YIL008W                                          | URM1          | YBR114W                 | RAD16         |
| YDL080C                                          | THI3          | YOR308C                 | SNU66         |
| YGL133W                                          | ITC1          | YOR275C                 | RIM20         |
| YDR293C                                          | SSD1          | YGL115W                 | SNF4          |
| YBL103C                                          | RTG3          | YDR261C                 | EXG2          |
| YBR215W                                          | HPC2          | YKL213C                 | DOA1          |
| YOL145C                                          | CTR9          | YKR048C                 | NAP1          |
| YMR224C                                          | MRE11         | YBR215W                 | HPC2          |
| YDR358W                                          | GGA1          | YOR327C                 | SNC2          |
| YOL145C                                          | CTR9          | YLR357W                 | RSC2          |
| YGL115W                                          | SNF4          | YMR133W                 | REC114        |

| Predictions at threshold level 0.75 continued... |               |                         |               |
|--------------------------------------------------|---------------|-------------------------|---------------|
| Gene1 of predicted pair                          |               | Gene2 of predicted pair |               |
| Systematic Name                                  | Standard Name | Systematic Name         | Standard Name |
| YDR443C                                          | SSN2          | YOL111C                 | MDY2          |
| YEL053C                                          | MAK10         | YLR398C                 | SKI2          |
| YDR225W                                          | HTA1          | YOR014W                 | RTS1          |
| YCR066W                                          | RAD18         | YEL043W                 | YEL043W       |
| YJR040W                                          | GEF1          | YNL127W                 | FAR11         |
| YER001W                                          | MNN1          | YDR245W                 | MNN10         |
| YOL136C                                          | PFK27         | YLR309C                 | IMH1          |
| YBR217W                                          | ATG12         | YDL192W                 | ARF1          |
| YBR171W                                          | SEC66         | YGL003C                 | CDH1          |
| YEL065W                                          | SIT1          | YMR224C                 | MRE11         |
| YCR053W                                          | THR4          | YDR310C                 | SUM1          |
| YJR033C                                          | RAV1          | YDR153C                 | ENT5          |
| YNR032W                                          | PPG1          | YDR207C                 | UME6          |
| YJR060W                                          | CBF1          | YKL114C                 | APN1          |
| YHR156C                                          | LIN1          | YDL077C                 | VAM6          |
| YNL106C                                          | INP52         | YOR243C                 | PUS7          |
| YHR073W                                          | OSH3          | YIL156W                 | UBP7          |
| YCR065W                                          | HCM1          | YBL027W                 | RPL19B        |
| YPL195W                                          | APL5          | YER122C                 | GLO3          |
| YNL117W                                          | MLS1          | YDR260C                 | SWM1          |
| YLR399C                                          | BDF1          | YGL200C                 | EMP24         |
| YDR254W                                          | CHL4          | YFR036W                 | CDC26         |
| YMR116C                                          | ASC1          | YBL072C                 | RPS8A         |
| YHL025W                                          | SNF6          | YKL109W                 | HAP4          |
| YLR360W                                          | VPS38         | YHL020C                 | OPI1          |
| YPL057C                                          | SUR1          | YOR066W                 | MSA1          |
| YDR318W                                          | MCM21         | YOL091W                 | SPO21         |
| YBL088C                                          | TEL1          | YPL022W                 | RAD1          |
| YOR132W                                          | VPS17         | YKL135C                 | APL2          |

| Predictions at threshold level 0.75 continued... |               |                         |               |
|--------------------------------------------------|---------------|-------------------------|---------------|
| Gene1 of predicted pair                          |               | Gene2 of predicted pair |               |
| Systematic Name                                  | Standard Name | Systematic Name         | Standard Name |
| YLR234W                                          | TOP3          | YHR039C-A               | VMA10         |
| YLR441C                                          | RPS1A         | YJR056C                 | YJR056C       |
| YGL033W                                          | HOP2          | YLR320W                 | MMS22         |
| YLR095C                                          | IOC2          | YMR016C                 | SOK2          |
| YHR073W                                          | OSH3          | YER110C                 | KAP123        |
| YBR290W                                          | BSD2          | YGR270W                 | YTA7          |
| YCR081W                                          | SRB8          | YNL199C                 | GCR2          |
| YBR194W                                          | SOY1          | YKL139W                 | CTK1          |
| YGL175C                                          | SAE2          | YGL031C                 | RPL24A        |
| YDR174W                                          | HMO1          | YGR188C                 | BUB1          |
| YJL053W                                          | PEP8          | YOR069W                 | VPS5          |
| YIL002C                                          | INP51         | YDL192W                 | ARF1          |
| YCR034W                                          | FEN1          | YLR288C                 | MEC3          |
| YIL034C                                          | CAP2          | YOR035C                 | SHE4          |
| YOR337W                                          | TEA1          | YJR032W                 | CPR7          |
| YOR275C                                          | RIM20         | YNL116W                 | DMA2          |
| YKL048C                                          | ELM1          | YLR254C                 | NDL1          |
| YHR134W                                          | WSS1          | YBR073W                 | RDH54         |
| YIL159W                                          | BNR1          | YDR477W                 | SNF1          |
| YBR217W                                          | ATG12         | YBL103C                 | RTG3          |
| YGR261C                                          | APL6          | YIL076W                 | SEC28         |
| YNL199C                                          | GCR2          | YEL036C                 | ANP1          |
| YHR134W                                          | WSS1          | YBR082C                 | UBC4          |
| YDR202C                                          | RAV2          | YDR310C                 | SUM1          |
| YDR477W                                          | SNF1          | YOR066W                 | MSA1          |
| YPR084W                                          | YPR084W       | YER120W                 | SCS2          |
| YHR031C                                          | RRM3          | YHR056C                 | RSC30         |
| YER162C                                          | RAD4          | YMR214W                 | SCJ1          |
| YPL042C                                          | SSN3          | YCL037C                 | SRO9          |

| Predictions at threshold level 0.75 continued... |               |                         |               |
|--------------------------------------------------|---------------|-------------------------|---------------|
| Gene1 of predicted pair                          |               | Gene2 of predicted pair |               |
| Systematic Name                                  | Standard Name | Systematic Name         | Standard Name |
| YGL087C                                          | MMS2          | YOL067C                 | RTG1          |
| YBL051C                                          | PIN4          | YDR144C                 | MKC7          |
| YDR101C                                          | ARX1          | YKL009W                 | MRT4          |
| YHR079C                                          | IRE1          | YOR275C                 | RIM20         |
| YNL139C                                          | RLR1          | YHR167W                 | THP2          |
| YBR280C                                          | SAF1          | YMR214W                 | SCJ1          |
| YPL024W                                          | RMI1          | YMR311C                 | GLC8          |
| YNL325C                                          | FIG4          | YFR036W                 | CDC26         |
| YOL121C                                          | RPS19A        | YOL081W                 | IRA2          |
| YNL106C                                          | INP52         | YML112W                 | CTK3          |
| YOR080W                                          | DIA2          | YKL213C                 | DOA1          |
| YKL139W                                          | CTK1          | YGL003C                 | CDH1          |
| YGL025C                                          | PGD1          | YDL192W                 | ARF1          |
| YFL023W                                          | BUD27         | YNL041C                 | COG6          |
| YBR200W                                          | BEM1          | YGL124C                 | MON1          |
| YOR368W                                          | RAD17         | YLR182W                 | SWI6          |
| YGL174W                                          | BUD13         | YLR315W                 | NKP2          |
| YFR031C-A                                        | RPL2A         | YAR014C                 | BUD14         |
| YMR224C                                          | MRE11         | YER139C                 | YER139C       |
| YJR059W                                          | PTK2          | YOR358W                 | HAP5          |
| YDL020C                                          | RPN4          | YDL047W                 | SIT4          |
| YBR114W                                          | RAD16         | YAL002W                 | VPS8          |
| YGR104C                                          | SRB5          | YOR140W                 | SFL1          |
| YHR084W                                          | STE12         | YLR452C                 | SST2          |
| YBL058W                                          | SHP1          | YKR035W-A               | DID2          |
| YBR112C                                          | CYC8          | YPL248C                 | GAL4          |
| YEL009C                                          | GCN4          | YGR252W                 | GCN5          |
| YOR358W                                          | HAP5          | YKL068W                 | NUP100        |
| YDR129C                                          | SAC6          | YKR014C                 | YPT52         |



| Predictions at threshold level 0.75 continued... |               |                         |               |
|--------------------------------------------------|---------------|-------------------------|---------------|
| Gene1 of predicted pair                          |               | Gene2 of predicted pair |               |
| Systematic Name                                  | Standard Name | Systematic Name         | Standard Name |
| YBR030W                                          | YBR030W       | YOR035C                 | SHE4          |
| YOR112W                                          | CEX1          | YOR069W                 | VPS5          |
| YBL047C                                          | EDE1          | YBL067C                 | UBP13         |
| YPR051W                                          | MAK3          | YJR033C                 | RAV1          |
| YJL004C                                          | SYS1          | YPL195W                 | APL5          |
| YOR337W                                          | TEA1          | YOR327C                 | SNC2          |
| YNL094W                                          | APP1          | YBR133C                 | HSL7          |
| YGL202W                                          | ARO8          | YBR043C                 | QDR3          |
| YFR031C-A                                        | RPL2A         | YIL076W                 | SEC28         |
| YDR174W                                          | HMO1          | YLR399C                 | BDF1          |
| YER162C                                          | RAD4          | YML071C                 | COG8          |
| YBR173C                                          | UMP1          | YIL076W                 | SEC28         |
| YNR052C                                          | POP2          | YPL203W                 | TPK2          |
| YML115C                                          | VAN1          | YPL213W                 | LEA1          |
| YLR192C                                          | HCR1          | YEL053C                 | MAK10         |
| YOR132W                                          | VPS17         | YAL002W                 | VPS8          |
| YMR016C                                          | SOK2          | YDL192W                 | ARF1          |
| YOL145C                                          | CTR9          | YLR182W                 | SWI6          |
| YGL226C-A                                        | OST5          | YMR214W                 | SCJ1          |
| YNL079C                                          | TPM1          | YMR089C                 | YTA12         |
| YLR292C                                          | SEC72         | YJL183W                 | MNN11         |
| YGR268C                                          | HUA1          | YPL246C                 | RBD2          |
| YLR192C                                          | HCR1          | YPR046W                 | MCM16         |
| YBR084C-A                                        | RPL19A        | YDL047W                 | SIT4          |
| YMR116C                                          | ASC1          | YNL329C                 | PEX6          |
| YJL140W                                          | RPB4          | YLR357W                 | RSC2          |
| YDL184C                                          | RPL41A        | YMR311C                 | GLC8          |
| YER110C                                          | KAP123        | YJL095W                 | BCK1          |
| YDR320C                                          | SWA2          | YDR202C                 | RAV2          |

| Predictions at threshold level 0.75 continued... |               |                         |               |
|--------------------------------------------------|---------------|-------------------------|---------------|
| Gene1 of predicted pair                          |               | Gene2 of predicted pair |               |
| Systematic Name                                  | Standard Name | Systematic Name         | Standard Name |
| YNL236W                                          | SIN4          | YJR035W                 | RAD26         |
| YNL025C                                          | SSN8          | YOR308C                 | SNU66         |
| YLR381W                                          | CTF3          | YMR109W                 | MYO5          |
| YPR120C                                          | CLB5          | YPL256C                 | CLN2          |
| YKR061W                                          | KTR2          | YHR115C                 | DMA1          |
| YLL007C                                          | YLL007C       | YBR107C                 | IML3          |
| YBR171W                                          | SEC66         | YER139C                 | YER139C       |
| YHR039C-A                                        | VMA10         | YDR310C                 | SUM1          |
| YBL047C                                          | EDE1          | YJR084W                 | CSN12         |
| YNL229C                                          | URE2          | YKR048C                 | NAP1          |
| YBR200W                                          | BEM1          | YDR358W                 | GGA1          |
| YBR194W                                          | SOY1          | YNL297C                 | MON2          |
| YNL297C                                          | MON2          | YLR447C                 | VMA6          |
| YMR004W                                          | MVP1          | YCR066W                 | RAD18         |
| YBR112C                                          | CYC8          | YBL103C                 | RTG3          |
| YPL042C                                          | SSN3          | YPL018W                 | CTF19         |
| YML016C                                          | PPZ1          | YNL236W                 | SIN4          |
| YDR443C                                          | SSN2          | YER040W                 | GLN3          |
| YDR335W                                          | MSN5          | YJR135C                 | MCM22         |
| YMR095C                                          | SNO1          | YMR214W                 | SCJ1          |
| YDR439W                                          | LRS4          | YMR055C                 | BUB2          |
| YCR088W                                          | ABP1          | YOR036W                 | PEP12         |
| YMR205C                                          | PFK2          | YMR038C                 | CCS1          |
| YPR084W                                          | YPR084W       | YHR167W                 | THP2          |
| YER139C                                          | YER139C       | YBR036C                 | CSG2          |
| YDR289C                                          | RTT103        | YAR014C                 | BUD14         |
| YDL002C                                          | NHP10         | YIR005W                 | IST3          |
| YBR200W                                          | BEM1          | YAL002W                 | VPS8          |
| YOR195W                                          | SLK19         | YKL048C                 | ELM1          |

| Predictions at threshold level 0.75 continued... |               |                         |               |
|--------------------------------------------------|---------------|-------------------------|---------------|
| Gene1 of predicted pair                          |               | Gene2 of predicted pair |               |
| Systematic Name                                  | Standard Name | Systematic Name         | Standard Name |
| YOR191W                                          | RIS1          | YPL024W                 | RMI1          |
| YML001W                                          | YPT7          | YKR014C                 | YPT52         |
| YBR290W                                          | BSD2          | YKR024C                 | DBP7          |
| YIL053W                                          | RHR2          | YLR180W                 | SAM1          |
| YOR112W                                          | CEX1          | YAR014C                 | BUD14         |
| YDR129C                                          | SAC6          | YBR260C                 | RGD1          |
| YIL156W                                          | UBP7          | YMR153W                 | NUP53         |
| YJR084W                                          | CSN12         | YMR311C                 | GLC8          |
| YLR083C                                          | EMP70         | YPL161C                 | BEM4          |
| YBR228W                                          | SLX1          | YPL057C                 | SUR1          |
| YBR042C                                          | CST26         | YML115C                 | VAN1          |
| YML115C                                          | VAN1          | YBR108W                 | YBR108W       |
| YNL087W                                          | TCB2          | YNL058C                 | YNL058C       |
| YLR447C                                          | VMA6          | YHR114W                 | BZZ1          |
| YPL032C                                          | SVL3          | YLR429W                 | CRN1          |
| YJR084W                                          | CSN12         | YBR082C                 | UBC4          |
| YPL253C                                          | VIK1          | YEL053C                 | MAK10         |
| YNL068C                                          | FKH2          | YPR120C                 | CLB5          |
| YPL161C                                          | BEM4          | YLR452C                 | SST2          |
| YIL036W                                          | CST6          | YER118C                 | SHO1          |
| YOR112W                                          | CEX1          | YNL051W                 | COG5          |
| YEL065W                                          | SIT1          | YNL076W                 | MKS1          |
| YLR192C                                          | HCR1          | YMR152W                 | YIM1          |
| YHR039C-A                                        | VMA10         | YOL081W                 | IRA2          |
| YPL037C                                          | EGD1          | YLR093C                 | NYV1          |
| YDR225W                                          | HTA1          | YGR188C                 | BUB1          |
| YCR081W                                          | SRB8          | YDR456W                 | NHX1          |
| YBL058W                                          | SHP1          | YLR452C                 | SST2          |
| YFR031C-A                                        | RPL2A         | YJR056C                 | YJR056C       |

| Predictions at threshold level 0.75 continued... |               |                         |               |
|--------------------------------------------------|---------------|-------------------------|---------------|
| Gene1 of predicted pair                          |               | Gene2 of predicted pair |               |
| Systematic Name                                  | Standard Name | Systematic Name         | Standard Name |
| YNL325C                                          | FIG4          | YBR171W                 | SEC66         |
| YBL103C                                          | RTG3          | YFR021W                 | ATG18         |
| YPR084W                                          | YPR084W       | YNL215W                 | IES2          |
| YBR108W                                          | YBR108W       | YBR239C                 | YBR239C       |
| YLR119W                                          | SRN2          | YHR156C                 | LIN1          |
| YKR061W                                          | KTR2          | YDR183W                 | PLP1          |
| YER116C                                          | SLX8          | YPR120C                 | CLB5          |
| YJR032W                                          | CPR7          | YMR230W                 | RPS10B        |
| YDR155C                                          | CPR1          | YDR183W                 | PLP1          |
| YMR133W                                          | REC114        | YLR093C                 | NYV1          |
| YHR039C-A                                        | VMA10         | YBR019C                 | GAL10         |
| YGR184C                                          | UBR1          | YLR150W                 | STM1          |
| YNL069C                                          | RPL16B        | YAR014C                 | BUD14         |
| YNL293W                                          | MSB3          | YAL030W                 | SNC1          |
| YML016C                                          | PPZ1          | YLR233C                 | EST1          |
| YFR031C-A                                        | RPL2A         | YBL102W                 | SFT2          |
| YNL044W                                          | YIP3          | YMR054W                 | STV1          |
| YPL042C                                          | SSN3          | YDR378C                 | LSM6          |
| YHR134W                                          | WSS1          | YOR243C                 | PUS7          |
| YEL022W                                          | GEA2          | YKR030W                 | GMH1          |
| YGR105W                                          | VMA21         | YNL127W                 | FAR11         |
| YEL043W                                          | YEL043W       | YNL238W                 | KEX2          |
| YKL126W                                          | YPK1          | YDR310C                 | SUM1          |
| YGL003C                                          | CDH1          | YHR115C                 | DMA1          |
| YBR200W                                          | BEM1          | YJR032W                 | CPR7          |
| YDR004W                                          | RAD57         | YDL002C                 | NHP10         |
| YPL213W                                          | LEA1          | YLR370C                 | ARC18         |
| YDR146C                                          | SWI5          | YPL248C                 | GAL4          |
| YOR106W                                          | VAM3          | YJR032W                 | CPR7          |

| Predictions at threshold level 0.75 continued... |               |                         |               |
|--------------------------------------------------|---------------|-------------------------|---------------|
| Gene1 of predicted pair                          |               | Gene2 of predicted pair |               |
| Systematic Name                                  | Standard Name | Systematic Name         | Standard Name |
| YDR176W                                          | NGG1          | YDL005C                 | MED2          |
| YBR131W                                          | CCZ1          | YDR137W                 | RGP1          |
| YOR358W                                          | HAP5          | YNL199C                 | GCR2          |
| YDR004W                                          | RAD57         | YLR394W                 | CST9          |
| YOR375C                                          | GDH1          | YKL041W                 | VPS24         |
| YMR116C                                          | ASC1          | YLR370C                 | ARC18         |
| YMR133W                                          | REC114        | YJR084W                 | CSN12         |
| YOR083W                                          | WHI5          | YJR060W                 | CBF1          |
| YGR019W                                          | UGA1          | YAL002W                 | VPS8          |
| YHL031C                                          | GOS1          | YDR153C                 | ENT5          |
| YPR102C                                          | RPL11A        | YPL240C                 | HSP82         |
| YLR095C                                          | IOC2          | YER116C                 | SLX8          |
| YBR173C                                          | UMP1          | YPR046W                 | MCM16         |
| YLR386W                                          | VAC14         | YML071C                 | COG8          |
| YGL253W                                          | HXK2          | YHL002W                 | HSE1          |
| YIL036W                                          | CST6          | YDR254W                 | CHL4          |
| YLR079W                                          | SIC1          | YJL127C                 | SPT10         |
| YJR140C                                          | HIR3          | YOR001W                 | RRP6          |
| YNL079C                                          | TPM1          | YJL095W                 | BCK1          |
| YMR216C                                          | SKY1          | YPL161C                 | BEM4          |
| YLR399C                                          | BDF1          | YDR335W                 | MSN5          |
| YOL018C                                          | TLG2          | YOL108C                 | INO4          |
| YMR026C                                          | PEX12         | YBR171W                 | SEC66         |
| YNL215W                                          | IES2          | YLR315W                 | NKP2          |
| YNL215W                                          | IES2          | YIL103W                 | DPH1          |
| YOR337W                                          | TEA1          | YJL172W                 | CPS1          |
| YHR111W                                          | UBA4          | YLR410W                 | VIP1          |
| YDL223C                                          | HBT1          | YMR152W                 | YIM1          |
| YGR104C                                          | SRB5          | YHL002W                 | HSE1          |

| Predictions at threshold level 0.75 continued... |               |                         |               |
|--------------------------------------------------|---------------|-------------------------|---------------|
| Gene1 of predicted pair                          |               | Gene2 of predicted pair |               |
| Systematic Name                                  | Standard Name | Systematic Name         | Standard Name |
| YDR484W                                          | VPS52         | YLR396C                 | VPS33         |
| YPL161C                                          | BEM4          | YJR135C                 | MCM22         |
| YPR036W                                          | VMA13         | YPL195W                 | APL5          |
| YDR335W                                          | MSN5          | YGL252C                 | RTG2          |
| YHR205W                                          | SCH9          | YNL079C                 | TPM1          |
| YBR171W                                          | SEC66         | YML001W                 | YPT7          |
| YKL006W                                          | RPL14A        | YNL079C                 | TPM1          |
| YER161C                                          | SPT2          | YEL013W                 | VAC8          |
| YHR171W                                          | ATG7          | YMR159C                 | ATG16         |
| YGR184C                                          | UBR1          | YPL057C                 | SUR1          |
| YHR060W                                          | VMA22         | YMR054W                 | STV1          |
| YHR161C                                          | YAP1801       | YKR020W                 | VPS51         |
| YNL069C                                          | RPL16B        | YPL161C                 | BEM4          |
| YNL054W                                          | VAC7          | YDR439W                 | LRS4          |
| YLR095C                                          | IOC2          | YMR152W                 | YIM1          |
| YFL023W                                          | BUD27         | YMR214W                 | SCJ1          |
| YNL238W                                          | KEX2          | YOL018C                 | TLG2          |
| YKL213C                                          | DOA1          | YJL048C                 | UBX6          |
| YNL238W                                          | KEX2          | YAL002W                 | VPS8          |
| YGR081C                                          | SLX9          | YER116C                 | SLX8          |
| YOR080W                                          | DIA2          | YOR141C                 | ARP8          |
| YML095C                                          | RAD10         | YDR264C                 | AKR1          |
| YBR200W                                          | BEM1          | YOR023C                 | AHC1          |
| YDR108W                                          | GSG1          | YEL053C                 | MAK10         |
| YDR129C                                          | SAC6          | YLR360W                 | VPS38         |
| YJL053W                                          | PEP8          | YNL297C                 | MON2          |
| YGL223C                                          | COG1          | YMR054W                 | STV1          |
| YDR176W                                          | NGG1          | YBR111W-A               | SUS1          |
| YDR245W                                          | MNN10         | YBL047C                 | EDE1          |

| Predictions at threshold level 0.75 continued... |               |                         |               |
|--------------------------------------------------|---------------|-------------------------|---------------|
| Gene1 of predicted pair                          |               | Gene2 of predicted pair |               |
| Systematic Name                                  | Standard Name | Systematic Name         | Standard Name |
| YIL159W                                          | BNR1          | YOR066W                 | MSA1          |
| YLR452C                                          | SST2          | YLR180W                 | SAM1          |
| YMR004W                                          | MVP1          | YLR447C                 | VMA6          |
| YPL024W                                          | RMI1          | YNR072W                 | HXT17         |
| YPR066W                                          | UBA3          | YLR306W                 | UBC12         |
| YIL156W                                          | UBP7          | YJL095W                 | BCK1          |
| YHR200W                                          | RPN10         | YOR035C                 | SHE4          |
| YDL065C                                          | PEX19         | YNL214W                 | PEX17         |
| YDR004W                                          | RAD57         | YMR179W                 | SPT21         |
| YMR214W                                          | SCJ1          | YOL081W                 | IRA2          |
| YDR443C                                          | SSN2          | YML115C                 | VAN1          |
| YNL058C                                          | YNL058C       | YDL083C                 | RPS16B        |
| YDR156W                                          | RPA14         | YGR270W                 | YTA7          |
| YOL030W                                          | GAS5          | YGL175C                 | SAE2          |
| YDL020C                                          | RPN4          | YDL160C                 | DHH1          |
| YML095C                                          | RAD10         | YNL107W                 | YAF9          |
| YGR104C                                          | SRB5          | YOR080W                 | DIA2          |
| YHL031C                                          | GOS1          | YAR014C                 | BUD14         |
| YMR127C                                          | SAS2          | YBR171W                 | SEC66         |
| YDR179C                                          | CSN9          | YDL216C                 | RRI1          |
| YNL044W                                          | YIP3          | YKR014C                 | YPT52         |
| YIL008W                                          | URM1          | YPL256C                 | CLN2          |
| YGL033W                                          | HOP2          | YMR311C                 | GLC8          |
| YJL058C                                          | BIT61         | YGL003C                 | CDH1          |
| YDL006W                                          | PTC1          | YPR119W                 | CLB2          |
| YJL036W                                          | SNX4          | YEL053C                 | MAK10         |
| YLR095C                                          | IOC2          | YPL195W                 | APL5          |
| YGR261C                                          | APL6          | YGL054C                 | ERV14         |
| YKL048C                                          | ELM1          | YDR207C                 | UME6          |

| Predictions at threshold level 0.75 continued... |               |                         |               |
|--------------------------------------------------|---------------|-------------------------|---------------|
| Gene1 of predicted pair                          |               | Gene2 of predicted pair |               |
| Systematic Name                                  | Standard Name | Systematic Name         | Standard Name |
| YLR119W                                          | SRN2          | YBL058W                 | SHP1          |
| YCL037C                                          | SRO9          | YPR119W                 | CLB2          |
| YCL037C                                          | SRO9          | YHR012W                 | VPS29         |
| YGR261C                                          | APL6          | YDR080W                 | VPS41         |
| YNL166C                                          | BNI5          | YCL024W                 | KCC4          |
| YHL031C                                          | GOS1          | YLR315W                 | NKP2          |
| YGL133W                                          | ITC1          | YLR386W                 | VAC14         |
| YNL307C                                          | MCK1          | YOL081W                 | IRA2          |
| YDR358W                                          | GGA1          | YPL259C                 | APM1          |
| YDR293C                                          | SSD1          | YPL120W                 | VPS30         |
| YDR395W                                          | SXM1          | YBR017C                 | KAP104        |
| YHR206W                                          | SKN7          | YLR433C                 | CNA1          |
| YMR095C                                          | SNO1          | YIL076W                 | SEC28         |
| YDR192C                                          | NUP42         | YML109W                 | ZDS2          |
| YNL206C                                          | RTT106        | YBR119W                 | MUD1          |
| YGR104C                                          | SRB5          | YNL079C                 | TPM1          |
| YMR127C                                          | SAS2          | YCR086W                 | CSM1          |
| YGR241C                                          | YAP1802       | YHR108W                 | GGA2          |
| YFR031C-A                                        | RPL2A         | YKL048C                 | ELM1          |
| YMR172W                                          | HOT1          | YNL107W                 | YAF9          |
| YNR072W                                          | HXT17         | YOL081W                 | IRA2          |
| YDR156W                                          | RPA14         | YBR107C                 | IML3          |
| YBL021C                                          | HAP3          | YEL056W                 | HAT2          |
| YAR014C                                          | BUD14         | YHR115C                 | DMA1          |
| YMR039C                                          | SUB1          | YDR289C                 | RTT103        |
| YDR469W                                          | SDC1          | YPL018W                 | CTF19         |
| YPL115C                                          | BEM3          | YDR318W                 | MCM21         |
| YLR090W                                          | XDJ1          | YPR036W                 | VMA13         |
| YMR153W                                          | NUP53         | YPR046W                 | MCM16         |



| Predictions at threshold level 0.75 continued... |               |                         |               |
|--------------------------------------------------|---------------|-------------------------|---------------|
| Gene1 of predicted pair                          |               | Gene2 of predicted pair |               |
| Systematic Name                                  | Standard Name | Systematic Name         | Standard Name |
| YLR313C                                          | SPH1          | YDL159W                 | STE7          |
| YGL025C                                          | PGD1          | YHR081W                 | LRP1          |
| YOL121C                                          | RPS19A        | YER040W                 | GLN3          |
| YDR261C                                          | EXG2          | YGL124C                 | MON1          |
| YLR410W                                          | VIP1          | YNL238W                 | KEX2          |
| YBL008W                                          | HIR1          | YDR200C                 | VPS64         |
| YBR036C                                          | CSG2          | YDR207C                 | UME6          |
| YJL124C                                          | LSM1          | YBR082C                 | UBC4          |
| YML115C                                          | VAN1          | YPL050C                 | MNN9          |
| YFR031C-A                                        | RPL2A         | YMR152W                 | YIM1          |
| YBR108W                                          | YBR108W       | YGL212W                 | VAM7          |
| YLR381W                                          | CTF3          | YHR200W                 | RPN10         |
| YGL054C                                          | ERV14         | YFL048C                 | EMP47         |
| YLR093C                                          | NYV1          | YBR280C                 | SAF1          |
| YKL006W                                          | RPL14A        | YDR378C                 | LSM6          |
| YHR200W                                          | RPN10         | YLR320W                 | MMS22         |
| YEL050C                                          | RML2          | YOL091W                 | SPO21         |
| YMR026C                                          | PEX12         | YLR398C                 | SKI2          |
| YPL137C                                          | GIP3          | YLR093C                 | NYV1          |
| YHR178W                                          | STB5          | YBR171W                 | SEC66         |
| YNR052C                                          | POP2          | YOR141C                 | ARP8          |
| YLR386W                                          | VAC14         | YLR398C                 | SKI2          |
| YNL021W                                          | HDA1          | YCR084C                 | TUP1          |
| YPR084W                                          | YPR084W       | YJL036W                 | SNX4          |
| YBR041W                                          | FAT1          | YKL094W                 | YJU3          |
| YGL212W                                          | VAM7          | YNR072W                 | HXT17         |
| YDL155W                                          | CLB3          | YDR144C                 | MKC7          |
| YDR129C                                          | SAC6          | YHR161C                 | YAP1801       |
| YJR083C                                          | ACF4          | YBR108W                 | YBR108W       |

| Predictions at threshold level 0.75 continued... |               |                         |               |
|--------------------------------------------------|---------------|-------------------------|---------------|
| Gene1 of predicted pair                          |               | Gene2 of predicted pair |               |
| Systematic Name                                  | Standard Name | Systematic Name         | Standard Name |
| YGL147C                                          | RPL9A         | YML071C                 | COG8          |
| YHL020C                                          | OPI1          | YJL004C                 | SYS1          |
| YGL212W                                          | VAM7          | YGR105W                 | VMA21         |
| YMR127C                                          | SAS2          | YPR119W                 | CLB2          |
| YMR127C                                          | SAS2          | YDR254W                 | CHL4          |
| YER044C                                          | ERG28         | YBR280C                 | SAF1          |
| YDR137W                                          | RGP1          | YBR019C                 | GAL10         |
| YNL106C                                          | INP52         | YLR182W                 | SWI6          |
| YCR065W                                          | HCM1          | YDL185W                 | TFP1          |
| YER001W                                          | MNN1          | YKR020W                 | VPS51         |
| YJL154C                                          | VPS35         | YMR311C                 | GLC8          |
| YBR290W                                          | BSD2          | YPL256C                 | CLN2          |
| YCR066W                                          | RAD18         | YAR014C                 | BUD14         |
| YMR224C                                          | MRE11         | YHL002W                 | HSE1          |
| YBL025W                                          | RRN10         | YLR370C                 | ARC18         |
| YOR358W                                          | HAP5          | YHL002W                 | HSE1          |
| YOR337W                                          | TEA1          | YML001W                 | YPT7          |
| YKR057W                                          | RPS21A        | YHR152W                 | SPO12         |
| YJR060W                                          | CBF1          | YOL091W                 | SPO21         |
| YMR192W                                          | GYL1          | YLR144C                 | ACF2          |
| YJL036W                                          | SNX4          | YNL051W                 | COG5          |
| YPL105C                                          | YPL105C       | YPL195W                 | APL5          |
| YBL008W                                          | HIR1          | YBR289W                 | SNF5          |
| YLR079W                                          | SIC1          | YPL106C                 | SSE1          |
| YNL218W                                          | MGS1          | YPL079W                 | RPL21B        |
| YLR292C                                          | SEC72         | YDR254W                 | CHL4          |
| YPL152W                                          | RRD2          | YDL047W                 | SIT4          |
| YPL105C                                          | YPL105C       | YPR119W                 | CLB2          |
| YDR137W                                          | RGP1          | YLR182W                 | SWI6          |

| Predictions at threshold level 0.75 continued... |               |                         |               |
|--------------------------------------------------|---------------|-------------------------|---------------|
| Gene1 of predicted pair                          |               | Gene2 of predicted pair |               |
| Systematic Name                                  | Standard Name | Systematic Name         | Standard Name |
| YMR116C                                          | ASC1          | YOL090W                 | MSH2          |
| YER120W                                          | SCS2          | YNL127W                 | FAR11         |
| YOR270C                                          | VPH1          | YER144C                 | UBP5          |
| YLR234W                                          | TOP3          | YOL067C                 | RTG1          |
| YLR207W                                          | HRD3          | YMR022W                 | UBC7          |
| YLR447C                                          | VMA6          | YNL041C                 | COG6          |
| YJR032W                                          | CPR7          | YMR167W                 | MLH1          |
| YNL106C                                          | INP52         | YIL036W                 | CST6          |
| YBL008W                                          | HIR1          | YLR399C                 | BDF1          |
| YBR200W                                          | BEM1          | YKR035W-A               | DID2          |
| YBR200W                                          | BEM1          | YBR041W                 | FAT1          |
| YMR016C                                          | SOK2          | YMR214W                 | SCJ1          |
| YBR290W                                          | BSD2          | YBL079W                 | NUP170        |
| YNL106C                                          | INP52         | YLR219W                 | MSC3          |
| YLR381W                                          | CTF3          | YGR188C                 | BUB1          |
| YML103C                                          | NUP188        | YJL006C                 | CTK2          |
| YDR225W                                          | HTA1          | YML028W                 | TSA1          |
| YDR129C                                          | SAC6          | YNL079C                 | TPM1          |
| YCR066W                                          | RAD18         | YML001W                 | YPT7          |
| YGR108W                                          | CLB1          | YNL236W                 | SIN4          |
| YKL110C                                          | KTI12         | YDL047W                 | SIT4          |
| YLR292C                                          | SEC72         | YNL288W                 | CAF40         |
| YBL047C                                          | EDE1          | YDR207C                 | UME6          |
| YAL024C                                          | LTE1          | YDL077C                 | VAM6          |
| YPR017C                                          | DSS4          | YNL297C                 | MON2          |
| YOR290C                                          | SNF2          | YBR009C                 | HHF1          |
| YNL297C                                          | MON2          | YKR001C                 | VPS1          |
| YOL111C                                          | MDY2          | YHR200W                 | RPN10         |
| YKL048C                                          | ELM1          | YOL067C                 | RTG1          |

| Predictions at threshold level 0.75 continued... |               |                         |               |
|--------------------------------------------------|---------------|-------------------------|---------------|
| Gene1 of predicted pair                          |               | Gene2 of predicted pair |               |
| Systematic Name                                  | Standard Name | Systematic Name         | Standard Name |
| YLR090W                                          | XDJ1          | YDR261C                 | EXG2          |
| YMR142C                                          | RPL13B        | YDL083C                 | RPS16B        |
| YMR095C                                          | SNO1          | YHR156C                 | LIN1          |
| YER110C                                          | KAP123        | YKL068W                 | NUP100        |
| YGL033W                                          | HOP2          | YGL183C                 | MND1          |
| YAL024C                                          | LTE1          | YBR200W                 | BEM1          |
| YOR290C                                          | SNF2          | YOR066W                 | MSA1          |
| YFR010W                                          | UBP6          | YHL030W                 | ECM29         |
| YBR127C                                          | VMA2          | YPL045W                 | VPS16         |
| YMR273C                                          | ZDS1          | YNL030W                 | HHF2          |
| YAL024C                                          | LTE1          | YGR184C                 | UBR1          |
| YPL129W                                          | TAF14         | YOL051W                 | GAL11         |
| YGL087C                                          | MMS2          | YJL095W                 | BCK1          |
| YDL020C                                          | RPN4          | YLR352W                 | YLR352W       |
| YML103C                                          | NUP188        | YIL148W                 | RPL40A        |
| YIL076W                                          | SEC28         | YOR127W                 | RGA1          |
| YDR440W                                          | DOT1          | YLR350W                 | ORM2          |
| YJR063W                                          | RPA12         | YDR289C                 | RTT103        |
| YLR360W                                          | VPS38         | YOR127W                 | RGA1          |
| YLR090W                                          | XDJ1          | YER139C                 | YER139C       |
| YBR017C                                          | KAP104        | YKR082W                 | NUP133        |
| YMR152W                                          | YIM1          | YER040W                 | GLN3          |
| YNL288W                                          | CAF40         | YMR055C                 | BUB2          |
| YOL108C                                          | INO4          | YAL002W                 | VPS8          |
| YGL147C                                          | RPL9A         | YNL087W                 | TCB2          |
| YDR245W                                          | MNN10         | YGR135W                 | PRE9          |
| YJL036W                                          | SNX4          | YER120W                 | SCS2          |
| YER116C                                          | SLX8          | YML095C                 | RAD10         |
| YPR036W                                          | VMA13         | YDR358W                 | GGA1          |

| Predictions at threshold level 0.75 continued... |               |                         |               |
|--------------------------------------------------|---------------|-------------------------|---------------|
| Gene1 of predicted pair                          |               | Gene2 of predicted pair |               |
| Systematic Name                                  | Standard Name | Systematic Name         | Standard Name |
| YPL057C                                          | SUR1          | YPL079W                 | RPL21B        |
| YBR270C                                          | BIT2          | YNL047C                 | SLM2          |
| YIL053W                                          | RHR2          | YJR056C                 | YJR056C       |
| YOR195W                                          | SLK19         | YHR013C                 | ARD1          |
| YNL025C                                          | SSN8          | YBR194W                 | SOY1          |
| YBR009C                                          | HHF1          | YKL068W                 | NUP100        |
| YDL020C                                          | RPN4          | YML028W                 | TSA1          |
| YNL044W                                          | YIP3          | YHR012W                 | VPS29         |
| YPL178W                                          | CBC2          | YGL016W                 | KAP122        |
| YPL018W                                          | CTF19         | YKL101W                 | HSL1          |
| YBR182C                                          | SMP1          | YPL089C                 | RLM1          |
| YDR156W                                          | RPA14         | YGL163C                 | RAD54         |
| YGL038C                                          | OCH1          | YNL051W                 | COG5          |
| YJL095W                                          | BCK1          | YGL019W                 | CKB1          |
| YER114C                                          | BOI2          | YGR152C                 | RSR1          |
| YML102W                                          | CAC2          | YML028W                 | TSA1          |
| YDR443C                                          | SSN2          | YHR156C                 | LIN1          |
| YDL155W                                          | CLB3          | YGR135W                 | PRE9          |
| YOR112W                                          | CEX1          | YER162C                 | RAD4          |
| YEL044W                                          | IES6          | YGL200C                 | EMP24         |
| YBL103C                                          | RTG3          | YLR398C                 | SKI2          |
| YJR024C                                          | MDE1          | YKL117W                 | SBA1          |
| YBR108W                                          | YBR108W       | YDR358W                 | GGA1          |
| YOR127W                                          | RGA1          | YPL195W                 | APL5          |
| YNL297C                                          | MON2          | YJR032W                 | CPR7          |
| YOR112W                                          | CEX1          | YKR020W                 | VPS51         |
| YLR360W                                          | VPS38         | YBR128C                 | ATG14         |
| YBL008W                                          | HIR1          | YER161C                 | SPT2          |
| YFL023W                                          | BUD27         | YMR231W                 | PEP5          |

| Predictions at threshold level 0.75 continued... |               |                         |               |
|--------------------------------------------------|---------------|-------------------------|---------------|
| Gene1 of predicted pair                          |               | Gene2 of predicted pair |               |
| Systematic Name                                  | Standard Name | Systematic Name         | Standard Name |
| YDR448W                                          | ADA2          | YOR023C                 | AHC1          |
| YGR159C                                          | NSR1          | YJL095W                 | BCK1          |
| YNL297C                                          | MON2          | YFL033C                 | RIM15         |
| YLR386W                                          | VAC14         | YBL103C                 | RTG3          |
| YPL057C                                          | SUR1          | YBR215W                 | HPC2          |
| YPR018W                                          | RLF2          | YBR009C                 | HHF1          |
| YGR249W                                          | MGA1          | YPR030W                 | CSR2          |
| YGL115W                                          | SNF4          | YGL003C                 | CDH1          |
| YER115C                                          | SPR6          | YPL246C                 | RBD2          |
| YPL129W                                          | TAF14         | YBR010W                 | HHT1          |
| YIL036W                                          | CST6          | YBR200W                 | BEM1          |
| YKL116C                                          | PRR1          | YHR081W                 | LRP1          |
| YDR254W                                          | CHL4          | YJL190C                 | RPS22A        |
| YER173W                                          | RAD24         | YHR079C-A               | SAE3          |
| YHR161C                                          | YAP1801       | YMR231W                 | PEP5          |
| YKL213C                                          | DOA1          | YDR310C                 | SUM1          |
| YJL154C                                          | VPS35         | YPR046W                 | MCM16         |
| YPR084W                                          | YPR084W       | YIL076W                 | SEC28         |
| YBL103C                                          | RTG3          | YPL137C                 | GIP3          |
| YMR109W                                          | MYO5          | YMR032W                 | HOF1          |
| YMR016C                                          | SOK2          | YER144C                 | UBP5          |
| YOL145C                                          | CTR9          | YDL005C                 | MED2          |
| YAL024C                                          | LTE1          | YLR288C                 | MEC3          |
| YPL240C                                          | HSP82         | YGL095C                 | VPS45         |
| YLR079W                                          | SIC1          | YMR311C                 | GLC8          |
| YHR200W                                          | RPN10         | YLR094C                 | GIS3          |
| YMR179W                                          | SPT21         | YOR001W                 | RRP6          |
| YPL152W                                          | RRD2          | YDR289C                 | RTT103        |
| YDL116W                                          | NUP84         | YLR399C                 | BDF1          |

| Predictions at threshold level 0.75 continued... |               |                         |               |
|--------------------------------------------------|---------------|-------------------------|---------------|
| Gene1 of predicted pair                          |               | Gene2 of predicted pair |               |
| Systematic Name                                  | Standard Name | Systematic Name         | Standard Name |
| YIL159W                                          | BNR1          | YIL076W                 | SEC28         |
| YGR054W                                          | YGR054W       | YPL018W                 | CTF19         |
| YPL161C                                          | BEM4          | YGL031C                 | RPL24A        |
| YBL008W                                          | HIR1          | YBR009C                 | HHF1          |
| YJL172W                                          | CPS1          | YGL025C                 | PGD1          |
| YHR156C                                          | LIN1          | YMR152W                 | YIM1          |
| YHR152W                                          | SPO12         | YGL163C                 | RAD54         |
| YOR054C                                          | VHS3          | YDL047W                 | SIT4          |
| YLR234W                                          | TOP3          | YDR144C                 | MKC7          |
| YLR386W                                          | VAC14         | YOL054W                 | PSH1          |
| YOL145C                                          | CTR9          | YDR363W-A               | SEM1          |
| YLR360W                                          | VPS38         | YDR320C                 | SWA2          |
| YBL008W                                          | HIR1          | YPL024W                 | RMI1          |
| YDR103W                                          | STE5          | YBR083W                 | TEC1          |
| YFR036W                                          | CDC26         | YDR183W                 | PLP1          |
| YBL079W                                          | NUP170        | YMR038C                 | CCS1          |
| YGR019W                                          | UGA1          | YJR135C                 | MCM22         |
| YDL223C                                          | HBT1          | YGL003C                 | CDH1          |
| YDR225W                                          | HTA1          | YER116C                 | SLX8          |
| YPL158C                                          | YPL158C       | YKL161C                 | YKL161C       |
| YBL103C                                          | RTG3          | YHR060W                 | VMA22         |
| YGL033W                                          | HOP2          | YML071C                 | COG8          |
| YDR004W                                          | RAD57         | YMR167W                 | MLH1          |
| YMR205C                                          | PFK2          | YLR320W                 | MMS22         |
| YPL024W                                          | RMI1          | YJL172W                 | CPS1          |
| YEL051W                                          | VMA8          | YDR310C                 | SUM1          |
| YPL042C                                          | SSN3          | YLR429W                 | CRN1          |
| YJL154C                                          | VPS35         | YDR323C                 | PEP7          |
| YIL036W                                          | CST6          | YLR182W                 | SWI6          |

| Predictions at threshold level 0.75 continued... |               |                         |               |
|--------------------------------------------------|---------------|-------------------------|---------------|
| Gene1 of predicted pair                          |               | Gene2 of predicted pair |               |
| Systematic Name                                  | Standard Name | Systematic Name         | Standard Name |
| YBR200W                                          | BEM1          | YJL183W                 | MNN11         |
| YMR238W                                          | DFG5          | YHR061C                 | GIC1          |
| YBL051C                                          | PIN4          | YBR107C                 | IML3          |
| YPL022W                                          | RAD1          | YDR076W                 | RAD55         |
| YJL053W                                          | PEP8          | YAL002W                 | VPS8          |
| YLR061W                                          | RPL22A        | YML097C                 | VPS9          |
| YKL116C                                          | PRR1          | YKL139W                 | CTK1          |
| YMR026C                                          | PEX12         | YLR386W                 | VAC14         |
| YPL050C                                          | MNN9          | YML012W                 | ERV25         |
| YBR195C                                          | MSI1          | YLR370C                 | ARC18         |
| YLR320W                                          | MMS22         | YPL195W                 | APL5          |
| YJL154C                                          | VPS35         | YPL105C                 | YPL105C       |
| YDR320C                                          | SWA2          | YPL120W                 | VPS30         |
| YAL024C                                          | LTE1          | YLR094C                 | GIS3          |
| YDR484W                                          | VPS52         | YKL126W                 | YPK1          |
| YHR178W                                          | STB5          | YOR308C                 | SNU66         |
| YLR337C                                          | VRP1          | YHL027W                 | RIM101        |
| YMR055C                                          | BUB2          | YJR090C                 | GRR1          |
| YPL057C                                          | SUR1          | YMR230W                 | RPS10B        |
| YIL103W                                          | DPH1          | YOR141C                 | ARP8          |
| YBR258C                                          | SHG1          | YNL297C                 | MON2          |
| YDR320C                                          | SWA2          | YPR032W                 | SRO7          |
| YOR127W                                          | RGA1          | YGL163C                 | RAD54         |
| YHR205W                                          | SCH9          | YDR245W                 | MNN10         |
| YDR383C                                          | NKP1          | YNL225C                 | CNM67         |
| YIL034C                                          | CAP2          | YGR054W                 | YGR054W       |
| YPL161C                                          | BEM4          | YEL036C                 | ANP1          |
| YPL037C                                          | EGD1          | YOR035C                 | SHE4          |
| YHR178W                                          | STB5          | YBR195C                 | MSI1          |



| Predictions at threshold level 0.75 continued... |               |                         |               |
|--------------------------------------------------|---------------|-------------------------|---------------|
| Gene1 of predicted pair                          |               | Gene2 of predicted pair |               |
| Systematic Name                                  | Standard Name | Systematic Name         | Standard Name |
| YOR043W                                          | WHI2          | YHR108W                 | GGA2          |
| YHR111W                                          | UBA4          | YDL155W                 | CLB3          |
| YGR270W                                          | YTA7          | YGL124C                 | MON1          |
| YGL147C                                          | RPL9A         | YFR036W                 | CDC26         |
| YGL200C                                          | EMP24         | YOR375C                 | GDH1          |
| YNL293W                                          | MSB3          | YPR028W                 | YOP1          |
| YPR084W                                          | YPR084W       | YDR293C                 | SSD1          |
| YGL115W                                          | SNF4          | YNL236W                 | SIN4          |
| YKL139W                                          | CTK1          | YNL004W                 | HRB1          |
| YGL212W                                          | VAM7          | YGL025C                 | PGD1          |
| YBR083W                                          | TEC1          | YJR099W                 | YUH1          |
| YNL225C                                          | CNM67         | YGL252C                 | RTG2          |
| YNL106C                                          | INP52         | YKR020W                 | VPS51         |
| YLR090W                                          | XDJ1          | YNL041C                 | COG6          |
| YGR104C                                          | SRB5          | YOR001W                 | RRP6          |
| YDL127W                                          | PCL2          | YDR310C                 | SUM1          |
| YGL212W                                          | VAM7          | YEL051W                 | VMA8          |
| YBR173C                                          | UMP1          | YNL325C                 | FIG4          |
| YMR164C                                          | MSS11         | YBL079W                 | NUP170        |
| YGL147C                                          | RPL9A         | YDL077C                 | VAM6          |
| YNL187W                                          | YNL187W       | YDR515W                 | SLF1          |
| YHR178W                                          | STB5          | YDR289C                 | RTT103        |
| YFR010W                                          | UBP6          | YOR308C                 | SNU66         |
| YJL176C                                          | SWI3          | YGR071C                 | YGR071C       |
| YDR389W                                          | SAC7          | YLR120C                 | YPS1          |
| YDR254W                                          | CHL4          | YPR046W                 | MCM16         |
| YHR167W                                          | THP2          | YER063W                 | THO1          |
| YEL065W                                          | SIT1          | YBR173C                 | UMP1          |
| YLR234W                                          | TOP3          | YPR120C                 | CLB5          |

| Predictions at threshold level 0.75 continued... |               |                         |               |
|--------------------------------------------------|---------------|-------------------------|---------------|
| Gene1 of predicted pair                          |               | Gene2 of predicted pair |               |
| Systematic Name                                  | Standard Name | Systematic Name         | Standard Name |
| YDR443C                                          | SSN2          | YLR320W                 | MMS22         |
| YGL223C                                          | COG1          | YER120W                 | SCS2          |
| YPR018W                                          | RLF2          | YGL066W                 | SGF73         |
| YDR484W                                          | VPS52         | YMR231W                 | PEP5          |
| YGR019W                                          | UGA1          | YNL166C                 | BNI5          |
| YLR182W                                          | SWI6          | YHR115C                 | DMA1          |
| YML103C                                          | NUP188        | YJR063W                 | RPA12         |
| YIL053W                                          | RHR2          | YPL161C                 | BEM4          |
| YKR061W                                          | KTR2          | YJR063W                 | RPA12         |
| YIL076W                                          | SEC28         | YGL054C                 | ERV14         |
| YOR109W                                          | INP53         | YPR119W                 | CLB2          |
| YHR010W                                          | RPL27A        | YIL133C                 | RPL16A        |
| YKL048C                                          | ELM1          | YNL041C                 | COG6          |
| YJR135C                                          | MCM22         | YOR308C                 | SNU66         |
| YBR112C                                          | CYC8          | YLR176C                 | RFX1          |
| YLR447C                                          | VMA6          | YHR012W                 | VPS29         |
| YGL163C                                          | RAD54         | YDR264C                 | AKR1          |
| YJL127C                                          | SPT10         | YOL091W                 | SPO21         |
| YPR072W                                          | NOT5          | YOL148C                 | SPT20         |
| YIL076W                                          | SEC28         | YOL121C                 | RPS19A        |
| YGR019W                                          | UGA1          | YER110C                 | KAP123        |
| YPL267W                                          | ACM1          | YDL155W                 | CLB3          |
| YMR224C                                          | MRE11         | YDR440W                 | DOT1          |
| YDR192C                                          | NUP42         | YKL068W                 | NUP100        |
| YCL032W                                          | STE50         | YBL016W                 | FUS3          |
| YPL024W                                          | RMI1          | YOR243C                 | PUS7          |
| YLR018C                                          | POM34         | YLR234W                 | TOP3          |
| YBR108W                                          | YBR108W       | YCR053W                 | THR4          |
| YKR072C                                          | SIS2          | YMR231W                 | PEP5          |

| Predictions at threshold level 0.75 continued... |               |                         |               |
|--------------------------------------------------|---------------|-------------------------|---------------|
| Gene1 of predicted pair                          |               | Gene2 of predicted pair |               |
| Systematic Name                                  | Standard Name | Systematic Name         | Standard Name |
| YDR261C                                          | EXG2          | YLR093C                 | NYV1          |
| YNL116W                                          | DMA2          | YOL054W                 | PSH1          |
| YFR036W                                          | CDC26         | YMR230W                 | RPS10B        |
| YDR318W                                          | MCM21         | YDR076W                 | RAD55         |
| YMR116C                                          | ASC1          | YPL022W                 | RAD1          |
| YOR132W                                          | VPS17         | YNL297C                 | MON2          |
| YML001W                                          | YPT7          | YER040W                 | GLN3          |
| YOR038C                                          | HIR2          | YBR010W                 | HHT1          |
| YJR056C                                          | YJR056C       | YEL053C                 | MAK10         |
| YDR156W                                          | RPA14         | YLR320W                 | MMS22         |
| YML095C                                          | RAD10         | YHL002W                 | HSE1          |
| YLR061W                                          | RPL22A        | YDR129C                 | SAC6          |
| YKR020W                                          | VPS51         | YPL195W                 | APL5          |
| YPL129W                                          | TAF14         | YEL013W                 | VAC8          |
| YPL024W                                          | RMI1          | YPL037C                 | EGD1          |
| YBR200W                                          | BEM1          | YMR205C                 | PFK2          |
| YPR052C                                          | NHP6A         | YGL094C                 | PAN2          |
| YDL184C                                          | RPL41A        | YLR370C                 | ARC18         |
| YDR385W                                          | EFT2          | YGR105W                 | VMA21         |
| YDR477W                                          | SNF1          | YBR030W                 | YBR030W       |
| YGR019W                                          | UGA1          | YJL190C                 | RPS22A        |
| YKR020W                                          | VPS51         | YJL183W                 | MNN11         |
| YML028W                                          | TSA1          | YKR030W                 | GMH1          |
| YHR079C                                          | IRE1          | YBR111W-A               | SUS1          |
| YFR040W                                          | SAP155        | YMR052W                 | FAR3          |
| YHL031C                                          | GOS1          | YOR109W                 | INP53         |
| YDL052C                                          | SLC1          | YKR046C                 | PET10         |
| YPL125W                                          | KAP120        | YBR017C                 | KAP104        |
| YOL111C                                          | MDY2          | YBL025W                 | RRN10         |

| Predictions at threshold level 0.75 continued... |               |                         |               |
|--------------------------------------------------|---------------|-------------------------|---------------|
| Gene1 of predicted pair                          |               | Gene2 of predicted pair |               |
| Systematic Name                                  | Standard Name | Systematic Name         | Standard Name |
| YDR443C                                          | SSN2          | YPR030W                 | CSR2          |
| YJR135C                                          | MCM22         | YAL002W                 | VPS8          |
| YPL106C                                          | SSE1          | YJR135C                 | MCM22         |
| YDR142C                                          | PEX7          | YAR042W                 | SWH1          |
| YCR081W                                          | SRB8          | YDR207C                 | UME6          |
| YPL042C                                          | SSN3          | YNL215W                 | IES2          |
| YGL175C                                          | SAE2          | YHR010W                 | RPL27A        |
| YGL190C                                          | CDC55         | YKR082W                 | NUP133        |
| YGR188C                                          | BUB1          | YLR032W                 | RAD5          |
| YPR036W                                          | VMA13         | YDR310C                 | SUM1          |
| YNL106C                                          | INP52         | YPL253C                 | VIK1          |
| YMR216C                                          | SKY1          | YEL043W                 | YEL043W       |
| YGL066W                                          | SGF73         | YCL010C                 | SGF29         |
| YGL078C                                          | DBP3          | YJR032W                 | CPR7          |
| YNL215W                                          | IES2          | YNL116W                 | DMA2          |
| YCL001W                                          | RER1          | YOL018C                 | TLG2          |
| YFR031C-A                                        | RPL2A         | YOR337W                 | TEA1          |
| YNL166C                                          | BNI5          | YDR254W                 | CHL4          |
| YMR142C                                          | RPL13B        | YGL025C                 | PGD1          |
| YBL021C                                          | HAP3          | YJL095W                 | BCK1          |
| YPL018W                                          | CTF19         | YJL190C                 | RPS22A        |
| YOR337W                                          | TEA1          | YER122C                 | GLO3          |
| YML095C                                          | RAD10         | YMR038C                 | CCS1          |
| YKL006W                                          | RPL14A        | YDR129C                 | SAC6          |
| YKL181W                                          | PRS1          | YER099C                 | PRS2          |
| YBR084C-A                                        | RPL19A        | YNL229C                 | URE2          |
| YOR112W                                          | CEX1          | YGL115W                 | SNF4          |
| YPL256C                                          | CLN2          | YKR024C                 | DBP7          |
| YOR080W                                          | DIA2          | YML016C                 | PPZ1          |

| Predictions at threshold level 0.75 continued... |               |                         |               |
|--------------------------------------------------|---------------|-------------------------|---------------|
| Gene1 of predicted pair                          |               | Gene2 of predicted pair |               |
| Systematic Name                                  | Standard Name | Systematic Name         | Standard Name |
| YDR318W                                          | MCM21         | YML028W                 | TSA1          |
| YDL155W                                          | CLB3          | YDL047W                 | SIT4          |
| YGR270W                                          | YTA7          | YPL152W                 | RRD2          |
| YLR094C                                          | GIS3          | YOL121C                 | RPS19A        |
| YKL007W                                          | CAP1          | YGR080W                 | TWF1          |
| YER120W                                          | SCS2          | YER122C                 | GLO3          |
| YDR293C                                          | SSD1          | YDL006W                 | PTC1          |
| YER161C                                          | SPT2          | YPR120C                 | CLB5          |
| YNL248C                                          | RPA49         | YLR410W                 | VIP1          |
| YNL325C                                          | FIG4          | YJL183W                 | MNN11         |
| YHR216W                                          | IMD2          | YPL240C                 | HSP82         |
| YMR224C                                          | MRE11         | YLR452C                 | SST2          |
| YGL174W                                          | BUD13         | YDR318W                 | MCM21         |
| YDR265W                                          | PEX10         | YAL055W                 | PEX22         |
| YNL297C                                          | MON2          | YEL042W                 | GDA1          |
| YIL159W                                          | BNR1          | YPL057C                 | SUR1          |
| YLR058C                                          | SHM2          | YLR381W                 | CTF3          |
| YBL008W                                          | HIR1          | YGL151W                 | NUT1          |
| YJL073W                                          | JEM1          | YOR085W                 | OST3          |
| YGL212W                                          | VAM7          | YHR081W                 | LRP1          |
| YLR234W                                          | TOP3          | YEL053C                 | MAK10         |
| YPL161C                                          | BEM4          | YPR032W                 | SRO7          |
| YCR002C                                          | CDC10         | YJL095W                 | BCK1          |
| YOR106W                                          | VAM3          | YOL108C                 | INO4          |
| YBL103C                                          | RTG3          | YML001W                 | YPT7          |
| YNL307C                                          | MCK1          | YDR183W                 | PLP1          |
| YKL010C                                          | UFD4          | YDR440W                 | DOT1          |
| YOR212W                                          | STE4          | YLR362W                 | STE11         |
| YIL034C                                          | CAP2          | YBL051C                 | PIN4          |

| Predictions at threshold level 0.75 continued... |               |                         |               |
|--------------------------------------------------|---------------|-------------------------|---------------|
| Gene1 of predicted pair                          |               | Gene2 of predicted pair |               |
| Systematic Name                                  | Standard Name | Systematic Name         | Standard Name |
| YFR031C-A                                        | RPL2A         | YKR001C                 | VPS1          |
| YHR167W                                          | THP2          | YER122C                 | GLO3          |
| YPL195W                                          | APL5          | YPR032W                 | SRO7          |
| YHR134W                                          | WSS1          | YAL002W                 | VPS8          |
| YJL183W                                          | MNN11         | YBR036C                 | CSG2          |
| YOR332W                                          | VMA4          | YDL185W                 | TFP1          |
| YBR065C                                          | ECM2          | YPR101W                 | SNT309        |
| YOR358W                                          | HAP5          | YJR135C                 | MCM22         |
| YLR216C                                          | CPR6          | YGL212W                 | VAM7          |
| YDL116W                                          | NUP84         | YGR108W                 | CLB1          |
| YPR084W                                          | YPR084W       | YBR194W                 | SOY1          |
| YCR020C-A                                        | MAK31         | YOL108C                 | INO4          |
| YPL129W                                          | TAF14         | YLR399C                 | BDF1          |
| YBL102W                                          | SFT2          | YNL297C                 | MON2          |
| YJR063W                                          | RPA12         | YLR182W                 | SWI6          |
| YOR327C                                          | SNC2          | YPR032W                 | SRO7          |
| YML001W                                          | YPT7          | YMR152W                 | YIM1          |
| YCR066W                                          | RAD18         | YLR032W                 | RAD5          |
| YLR337C                                          | VRP1          | YJR135C                 | MCM22         |
| YBR217W                                          | ATG12         | YBR280C                 | SAF1          |
| YHR079C                                          | IRE1          | YDR176W                 | NGG1          |
| YIL159W                                          | BNR1          | YBR217W                 | ATG12         |
| YPR052C                                          | NHP6A         | YOL148C                 | SPT20         |
| YBR036C                                          | CSG2          | YGL148W                 | ARO2          |
| YPL161C                                          | BEM4          | YNL238W                 | KEX2          |
| YOR043W                                          | WHI2          | YML071C                 | COG8          |
| YKL006W                                          | RPL14A        | YHL002W                 | HSE1          |
| YCL037C                                          | SRO9          | YPL037C                 | EGD1          |
| YGL066W                                          | SGF73         | YKR057W                 | RPS21A        |

| Predictions at threshold level 0.75 continued... |               |                         |               |
|--------------------------------------------------|---------------|-------------------------|---------------|
| Gene1 of predicted pair                          |               | Gene2 of predicted pair |               |
| Systematic Name                                  | Standard Name | Systematic Name         | Standard Name |
| YOR290C                                          | SNF2          | YHR200W                 | RPN10         |
| YDL013W                                          | SLX5          | YGL175C                 | SAE2          |
| YDR293C                                          | SSD1          | YGR054W                 | YGR054W       |
| YLR102C                                          | APC9          | YBL087C                 | RPL23A        |
| YDR477W                                          | SNF1          | YDR028C                 | REG1          |
| YBR228W                                          | SLX1          | YMR284W                 | YKU70         |
| YBR030W                                          | YBR030W       | YDL083C                 | RPS16B        |
| YDR443C                                          | SSN2          | YLR441C                 | RPS1A         |
| YML016C                                          | PPZ1          | YNL225C                 | CNM67         |
| YEL056W                                          | HAT2          | YHL002W                 | HSE1          |
| YHR200W                                          | RPN10         | YMR038C                 | CCS1          |
| YOL121C                                          | RPS19A        | YDL077C                 | VAM6          |
| YLR337C                                          | VRP1          | YLR425W                 | TUS1          |
| YJL124C                                          | LSM1          | YLR313C                 | SPH1          |
| YJR140C                                          | HIR3          | YHL031C                 | GOS1          |
| YBR057C                                          | MUM2          | YPL096C-A               | ERI1          |
| YPL137C                                          | GIP3          | YER139C                 | YER139C       |
| YHR200W                                          | RPN10         | YBL025W                 | RRN10         |
| YPL024W                                          | RMI1          | YLR119W                 | SRN2          |
| YER120W                                          | SCS2          | YHR012W                 | VPS29         |
| YIL076W                                          | SEC28         | YMR216C                 | SKY1          |
| YDR137W                                          | RGP1          | YHR200W                 | RPN10         |
| YDR318W                                          | MCM21         | YDR155C                 | CPR1          |
| YJR140C                                          | HIR3          | YJL138C                 | TIF2          |
| YHL031C                                          | GOS1          | YPL037C                 | EGD1          |
| YBL008W                                          | HIR1          | YLR410W                 | VIP1          |
| YNL236W                                          | SIN4          | YJR060W                 | CBF1          |
| YBR126C                                          | TPS1          | YMR261C                 | TPS3          |
| YJL053W                                          | PEP8          | YMR216C                 | SKY1          |

| Predictions at threshold level 0.75 continued... |               |                         |               |
|--------------------------------------------------|---------------|-------------------------|---------------|
| Gene1 of predicted pair                          |               | Gene2 of predicted pair |               |
| Systematic Name                                  | Standard Name | Systematic Name         | Standard Name |
| YKL025C                                          | PAN3          | YHR134W                 | WSS1          |
| YMR246W                                          | FAA4          | YMR152W                 | YIM1          |
| YPL129W                                          | TAF14         | YDL005C                 | MED2          |
| YLR410W                                          | VIP1          | YNL116W                 | DMA2          |
| YNL031C                                          | HHT2          | YLR357W                 | RSC2          |
| YGL161C                                          | YIP5          | YGL198W                 | YIP4          |
| YEL053C                                          | MAK10         | YJR060W                 | CBF1          |
| YJL154C                                          | VPS35         | YCL001W                 | RER1          |
| YHR111W                                          | UBA4          | YGL253W                 | HXK2          |
| YKR001C                                          | VPS1          | YDR323C                 | PEP7          |
| YOR132W                                          | VPS17         | YLR447C                 | VMA6          |
| YLR337C                                          | VRP1          | YLR386W                 | VAC14         |
| YCL037C                                          | SRO9          | YOR124C                 | UBP2          |
| YPR049C                                          | ATG11         | YLR423C                 | ATG17         |
| YKL025C                                          | PAN3          | YMR109W                 | MYO5          |
| YDR293C                                          | SSD1          | YER033C                 | ZRG8          |
| YDR293C                                          | SSD1          | YJR060W                 | CBF1          |
| YAL024C                                          | LTE1          | YPR036W                 | VMA13         |
| YKL048C                                          | ELM1          | YPL161C                 | BEM4          |
| YBR173C                                          | UMP1          | YFR036W                 | CDC26         |
| YDR378C                                          | LSM6          | YHR167W                 | THP2          |
| YHL031C                                          | GOS1          | YKR014C                 | YPT52         |
| YJL176C                                          | SWI3          | YBR228W                 | SLX1          |
| YDL155W                                          | CLB3          | YLR370C                 | ARC18         |
| YLR148W                                          | PEP3          | YDL226C                 | GCS1          |
| YDL223C                                          | HBT1          | YBL025W                 | RRN10         |
| YDR318W                                          | MCM21         | YJR090C                 | GRR1          |
| YLR083C                                          | EMP70         | YNL041C                 | COG6          |
| YBL103C                                          | RTG3          | YJL095W                 | BCK1          |



| Predictions at threshold level 0.75 continued... |               |                         |               |
|--------------------------------------------------|---------------|-------------------------|---------------|
| Gene1 of predicted pair                          |               | Gene2 of predicted pair |               |
| Systematic Name                                  | Standard Name | Systematic Name         | Standard Name |
| YOR039W                                          | CKB2          | YML016C                 | PPZ1          |
| YHR134W                                          | WSS1          | YLR410W                 | VIP1          |
| YPL022W                                          | RAD1          | YMR202W                 | ERG2          |
| YFR036W                                          | CDC26         | YDR076W                 | RAD55         |
| YOL121C                                          | RPS19A        | YBL025W                 | RRN10         |
| YLR429W                                          | CRN1          | YDL155W                 | CLB3          |
| YDR439W                                          | LRS4          | YNL307C                 | MCK1          |
| YNL016W                                          | PUB1          | YJL187C                 | SWE1          |
| YBR200W                                          | BEM1          | YOL091W                 | SPO21         |
| YBR200W                                          | BEM1          | YOR141C                 | ARP8          |
| YDL223C                                          | HBT1          | YNL058C                 | YNL058C       |
| YBR173C                                          | UMP1          | YEL053C                 | MAK10         |
| YIL034C                                          | CAP2          | YOR023C                 | AHC1          |
| YDR293C                                          | SSD1          | YCL001W                 | RER1          |
| YNL297C                                          | MON2          | YDL077C                 | VAM6          |
| YDR335W                                          | MSN5          | YER139C                 | YER139C       |
| YMR055C                                          | BUB2          | YDR469W                 | SDC1          |
| YLR148W                                          | PEP3          | YGR261C                 | APL6          |
| YMR109W                                          | MYO5          | YLR452C                 | SST2          |
| YOR008C                                          | SLG1          | YPL161C                 | BEM4          |
| YKL139W                                          | CTK1          | YEL013W                 | VAC8          |
| YPR120C                                          | CLB5          | YJR035W                 | RAD26         |
| YMR172W                                          | HOT1          | YHR114W                 | BZZ1          |
| YDR358W                                          | GGA1          | YEL022W                 | GEA2          |
| YPL049C                                          | DIG1          | YPL256C                 | CLN2          |
| YPR084W                                          | YPR084W       | YGR020C                 | VMA7          |
| YLR399C                                          | BDF1          | YHR115C                 | DMA1          |
| YDR245W                                          | MNN10         | YOR106W                 | VAM3          |
| YLR079W                                          | SIC1          | YBR260C                 | RGD1          |

| Predictions at threshold level 0.75 continued... |               |                         |               |
|--------------------------------------------------|---------------|-------------------------|---------------|
| Gene1 of predicted pair                          |               | Gene2 of predicted pair |               |
| Systematic Name                                  | Standard Name | Systematic Name         | Standard Name |
| YIL148W                                          | RPL40A        | YMR199W                 | CLN1          |
| YDR293C                                          | SSD1          | YGL124C                 | MON1          |
| YDL116W                                          | NUP84         | YHR115C                 | DMA1          |
| YOL018C                                          | TLG2          | YDL192W                 | ARF1          |
| YIL002C                                          | INP51         | YHR108W                 | GGA2          |
| YLR192C                                          | HCR1          | YOL121C                 | RPS19A        |
| YML071C                                          | COG8          | YOL018C                 | TLG2          |
| YBL051C                                          | PIN4          | YJR032W                 | CPR7          |
| YNL297C                                          | MON2          | YKR020W                 | VPS51         |
| YPR173C                                          | VPS4          | YKL041W                 | VPS24         |
| YFR036W                                          | CDC26         | YDR358W                 | GGA1          |
| YMR198W                                          | CIK1          | YNL107W                 | YAF9          |
| YHR013C                                          | ARD1          | YPR119W                 | CLB2          |
| YOR290C                                          | SNF2          | YOL121C                 | RPS19A        |
| YLR150W                                          | STM1          | YDR318W                 | MCM21         |
| YMR198W                                          | CIK1          | YML115C                 | VAN1          |
| YBL058W                                          | SHP1          | YKL116C                 | PRR1          |
| YDR484W                                          | VPS52         | YLR371W                 | ROM2          |
| YNL243W                                          | SLA2          | YDR156W                 | RPA14         |
| YIL053W                                          | RHR2          | YDL077C                 | VAM6          |
| YML062C                                          | MFT1          | YKL160W                 | ELF1          |
| YNL201C                                          | PSY2          | YHR134W                 | WSS1          |
| YMR142C                                          | RPL13B        | YPL037C                 | EGD1          |
| YDR363W-A                                        | SEM1          | YGL031C                 | RPL24A        |
| YLR385C                                          | SWC7          | YJR082C                 | EAF6          |
| YLR240W                                          | VPS34         | YPL045W                 | VPS16         |
| YNL166C                                          | BNI5          | YBR107C                 | IML3          |
| YCR066W                                          | RAD18         | YPL037C                 | EGD1          |
| YGL178W                                          | MPT5          | YGL094C                 | PAN2          |

| Predictions at threshold level 0.75 continued... |               |                         |               |
|--------------------------------------------------|---------------|-------------------------|---------------|
| Gene1 of predicted pair                          |               | Gene2 of predicted pair |               |
| Systematic Name                                  | Standard Name | Systematic Name         | Standard Name |
| YGR054W                                          | YGR054W       | YGL151W                 | NUT1          |
| YML103C                                          | NUP188        | YFR036W                 | CDC26         |
| YKR035W-A                                        | DID2          | YMR133W                 | REC114        |
| YDL056W                                          | MBP1          | YGL003C                 | CDH1          |
| YML115C                                          | VAN1          | YDR310C                 | SUM1          |
| YOR001W                                          | RRP6          | YDR254W                 | CHL4          |
| YPR173C                                          | VPS4          | YDL192W                 | ARF1          |
| YDR155C                                          | CPR1          | YAL002W                 | VPS8          |
| YBL021C                                          | HAP3          | YCR086W                 | CSM1          |
| YML095C                                          | RAD10         | YJR005W                 | APL1          |
| YAL024C                                          | LTE1          | YDR174W                 | HMO1          |
| YMR153W                                          | NUP53         | YLR371W                 | ROM2          |
| YPL037C                                          | EGD1          | YOL108C                 | INO4          |
| YHR156C                                          | LIN1          | YMR133W                 | REC114        |
| YIL159W                                          | BNR1          | YDR207C                 | UME6          |
| YOR043W                                          | WHI2          | YJR135C                 | MCM22         |
| YEL050C                                          | RML2          | YPR046W                 | MCM16         |
| YIL159W                                          | BNR1          | YNL041C                 | COG6          |
| YHR060W                                          | VMA22         | YPL137C                 | GIP3          |
| YIL038C                                          | NOT3          | YGR134W                 | CAF130        |
| YMR199W                                          | CLN1          | YPL253C                 | VIK1          |
| YPL115C                                          | BEM3          | YAL002W                 | VPS8          |
| YOR290C                                          | SNF2          | YGL124C                 | MON1          |
| YDL020C                                          | RPN4          | YOR191W                 | RIS1          |
| YOR080W                                          | DIA2          | YOL091W                 | SPO21         |
| YJL044C                                          | GYP6          | YDR456W                 | NHX1          |
| YHL020C                                          | OPI1          | YJR060W                 | CBF1          |
| YOR270C                                          | VPH1          | YBL025W                 | RRN10         |
| YNL044W                                          | YIP3          | YNL051W                 | COG5          |

| Predictions at threshold level 0.75 continued... |               |                         |               |
|--------------------------------------------------|---------------|-------------------------|---------------|
| Gene1 of predicted pair                          |               | Gene2 of predicted pair |               |
| Systematic Name                                  | Standard Name | Systematic Name         | Standard Name |
| YLR090W                                          | XDJ1          | YLR371W                 | ROM2          |
| YPR084W                                          | YPR084W       | YMR216C                 | SKY1          |
| YDR443C                                          | SSN2          | YPR072W                 | NOT5          |
| YKR101W                                          | SIR1          | YNL030W                 | HHF2          |
| YOR195W                                          | SLK19         | YLR399C                 | BDF1          |
| YBR194W                                          | SOY1          | YBR107C                 | IML3          |
| YOL111C                                          | MDY2          | YNL041C                 | COG6          |
| YBL027W                                          | RPL19B        | YGL031C                 | RPL24A        |
| YFL047W                                          | RGD2          | YKL068W                 | NUP100        |
| YJR060W                                          | CBF1          | YOR141C                 | ARP8          |
| YNL264C                                          | PDR17         | YNL079C                 | TPM1          |
| YER116C                                          | SLX8          | YHR039C-A               | VMA10         |
| YDL161W                                          | ENT1          | YFL026W                 | STE2          |
| YNL229C                                          | URE2          | YGL031C                 | RPL24A        |
| YDR004W                                          | RAD57         | YMR038C                 | CCS1          |
| YKR095W                                          | MLP1          | YGL163C                 | RAD54         |
| YOL121C                                          | RPS19A        | YOR327C                 | SNC2          |
| YPL042C                                          | SSN3          | YGR270W                 | YTA7          |
| YHR111W                                          | UBA4          | YDL047W                 | SIT4          |
| YDR004W                                          | RAD57         | YHR010W                 | RPL27A        |
| YHR060W                                          | VMA22         | YER044C                 | ERG28         |
| YHR084W                                          | STE12         | YBR083W                 | TEC1          |
| YLR083C                                          | EMP70         | YKR001C                 | VPS1          |
| YLR170C                                          | APS1          | YDR358W                 | GGA1          |
| YNL117W                                          | MLS1          | YKL101W                 | HSL1          |
| YDL002C                                          | NHP10         | YDR137W                 | RGP1          |
| YBR278W                                          | DPB3          | YBR195C                 | MSI1          |
| YML001W                                          | YPT7          | YBR019C                 | GAL10         |
| YPL137C                                          | GIP3          | YER040W                 | GLN3          |

| Predictions at threshold level 0.75 continued... |               |                         |               |
|--------------------------------------------------|---------------|-------------------------|---------------|
| Gene1 of predicted pair                          |               | Gene2 of predicted pair |               |
| Systematic Name                                  | Standard Name | Systematic Name         | Standard Name |
| YNL094W                                          | APP1          | YLR144C                 | ACF2          |
| YBR171W                                          | SEC66         | YHL011C                 | PRS3          |
| YGL033W                                          | HOP2          | YER144C                 | UBP5          |
| YPL161C                                          | BEM4          | YPL137C                 | GIP3          |
| YMR026C                                          | PEX12         | YGL212W                 | VAM7          |
| YNR058W                                          | BIO3          | YML059C                 | NTE1          |
| YNL215W                                          | IES2          | YOR368W                 | RAD17         |
| YPL115C                                          | BEM3          | YNL288W                 | CAF40         |
| YJL136C                                          | RPS21B        | YKL048C                 | ELM1          |
| YDR146C                                          | SWI5          | YDR245W                 | MNN10         |
| YGL175C                                          | SAE2          | YDR076W                 | RAD55         |
| YGL066W                                          | SGF73         | YGR184C                 | UBR1          |
| YHR039C-A                                        | VMA10         | YMR311C                 | GLC8          |
| YPL161C                                          | BEM4          | YNR032W                 | PPG1          |
| YER087C-B                                        | SBH1          | YNR049C                 | MSO1          |
| YDL020C                                          | RPN4          | YOL067C                 | RTG1          |
| YFR031C-A                                        | RPL2A         | YPL137C                 | GIP3          |
| YLR061W                                          | RPL22A        | YML071C                 | COG8          |
| YMR164C                                          | MSS11         | YER109C                 | FLO8          |
| YNL058C                                          | YNL058C       | YNL041C                 | COG6          |
| YPL256C                                          | CLN2          | YER049W                 | TPA1          |
| YJL127C                                          | SPT10         | YMR202W                 | ERG2          |
| YMR172W                                          | HOT1          | YJR032W                 | CPR7          |
| YBR108W                                          | YBR108W       | YCR086W                 | CSM1          |
| YLR452C                                          | SST2          | YOR066W                 | MSA1          |
| YHR013C                                          | ARD1          | YOL081W                 | IRA2          |
| YDR439W                                          | LRS4          | YHR115C                 | DMA1          |
| YNL201C                                          | PSY2          | YDR335W                 | MSN5          |
| YAL024C                                          | LTE1          | YJL124C                 | LSM1          |

| Predictions at threshold level 0.75 continued... |               |                         |               |
|--------------------------------------------------|---------------|-------------------------|---------------|
| Gene1 of predicted pair                          |               | Gene2 of predicted pair |               |
| Systematic Name                                  | Standard Name | Systematic Name         | Standard Name |
| YMR153W                                          | NUP53         | YOR270C                 | VPH1          |
| YFL003C                                          | MSH4          | YOR358W                 | HAP5          |
| YBR217W                                          | ATG12         | YHR171W                 | ATG7          |
| YNR052C                                          | POP2          | YOR080W                 | DIA2          |
| YCR020C-A                                        | MAK31         | YEL043W                 | YEL043W       |
| YEL050C                                          | RML2          | YLR381W                 | CTF3          |
| YNL243W                                          | SLA2          | YLR234W                 | TOP3          |
| YPL161C                                          | BEM4          | YDR261C                 | EXG2          |
| YML016C                                          | PPZ1          | YNL116W                 | DMA2          |
| YMR153W                                          | NUP53         | YJL183W                 | MNN11         |
| YOL126C                                          | MDH2          | YIL148W                 | RPL40A        |
| YIL053W                                          | RHR2          | YMR026C                 | PEX12         |
| YDL184C                                          | RPL41A        | YKL048C                 | ELM1          |
| YFR030W                                          | MET10         | YNL107W                 | YAF9          |
| YKR035W-A                                        | DID2          | YHR039C-A               | VMA10         |
| YGR072W                                          | UPF3          | YGL054C                 | ERV14         |
| YOR140W                                          | SFL1          | YHR205W                 | SCH9          |
| YDR129C                                          | SAC6          | YGL212W                 | VAM7          |
| YDR261C                                          | EXG2          | YML071C                 | COG8          |
| YLR090W                                          | XDJ1          | YDR443C                 | SSN2          |
| YPL137C                                          | GIP3          | YEL060C                 | PRB1          |
| YNL206C                                          | RTT106        | YDL047W                 | SIT4          |
| YMR116C                                          | ASC1          | YOR312C                 | RPL20B        |
| YDR383C                                          | NKP1          | YDR318W                 | MCM21         |
| YNL069C                                          | RPL16B        | YGL246C                 | RAI1          |
| YKL073W                                          | LHS1          | YJL159W                 | HSP150        |
| YDR320C                                          | SWA2          | YDR108W                 | GSG1          |
| YHL031C                                          | GOS1          | YLR350W                 | ORM2          |
| YPR036W                                          | VMA13         | YPL057C                 | SUR1          |

| Predictions at threshold level 0.75 continued... |               |                         |               |
|--------------------------------------------------|---------------|-------------------------|---------------|
| Gene1 of predicted pair                          |               | Gene2 of predicted pair |               |
| Systematic Name                                  | Standard Name | Systematic Name         | Standard Name |
| YML097C                                          | VPS9          | YBR082C                 | UBC4          |
| YOR290C                                          | SNF2          | YMR230W                 | RPS10B        |
| YML016C                                          | PPZ1          | YML112W                 | CTK3          |
| YPL161C                                          | BEM4          | YOR043W                 | WHI2          |
| YHR119W                                          | SET1          | YAR003W                 | SWD1          |
| YFL026W                                          | STE2          | YJR086W                 | STE18         |
| YHR098C                                          | SFB3          | YCR053W                 | THR4          |
| YDR477W                                          | SNF1          | YGL208W                 | SIP2          |
| YGL174W                                          | BUD13         | YDR137W                 | RGP1          |
| YMR004W                                          | MVP1          | YCL001W                 | RER1          |
| YJL176C                                          | SWI3          | YPL213W                 | LEA1          |
| YLR432W                                          | IMD3          | YHR216W                 | IMD2          |
| YDR245W                                          | MNN10         | YJL117W                 | PHO86         |
| YOR066W                                          | MSA1          | YNL238W                 | KEX2          |
| YOR132W                                          | VPS17         | YKL048C                 | ELM1          |
| YKR072C                                          | SIS2          | YMR199W                 | CLN1          |
| YDR443C                                          | SSN2          | YPL248C                 | GAL4          |
| YNL041C                                          | COG6          | YLR371W                 | ROM2          |
| YOR327C                                          | SNC2          | YJL095W                 | BCK1          |
| YJL124C                                          | LSM1          | YBR107C                 | IML3          |
| YNL201C                                          | PSY2          | YHR013C                 | ARD1          |
| YMR198W                                          | CIK1          | YPR046W                 | MCM16         |
| YLR234W                                          | TOP3          | YPR119W                 | CLB2          |
| YLR083C                                          | EMP70         | YDR108W                 | GSG1          |
| YKR072C                                          | SIS2          | YDR289C                 | RTT103        |
| YDR484W                                          | VPS52         | YGL095C                 | VPS45         |
| YPL234C                                          | TFP3          | YNL127W                 | FAR11         |
| YMR216C                                          | SKY1          | YML038C                 | YMD8          |
| YGL025C                                          | PGD1          | YDR310C                 | SUM1          |

| Predictions at threshold level 0.75 continued... |               |                         |               |
|--------------------------------------------------|---------------|-------------------------|---------------|
| Gene1 of predicted pair                          |               | Gene2 of predicted pair |               |
| Systematic Name                                  | Standard Name | Systematic Name         | Standard Name |
| YLR386W                                          | VAC14         | YDL047W                 | SIT4          |
| YGL153W                                          | PEX14         | YNL214W                 | PEX17         |
| YOR270C                                          | VPH1          | YDR358W                 | GGA1          |
| YGL003C                                          | CDH1          | YDR200C                 | VPS64         |
| YPL042C                                          | SSN3          | YCR084C                 | TUP1          |
| YNL087W                                          | TCB2          | YKL048C                 | ELM1          |
| YBR217W                                          | ATG12         | YOL111C                 | MDY2          |
| YBL008W                                          | HIR1          | YGL163C                 | RAD54         |
| YEL053C                                          | MAK10         | YDR318W                 | MCM21         |
| YBL008W                                          | HIR1          | YOR039W                 | CKB2          |
| YDR156W                                          | RPA14         | YDR378C                 | LSM6          |
| YPL161C                                          | BEM4          | YDR153C                 | ENT5          |
| YBR030W                                          | YBR030W       | YNL325C                 | FIG4          |
| YLR381W                                          | CTF3          | YDL155W                 | CLB3          |
| YDR260C                                          | SWM1          | YPR046W                 | MCM16         |
| YNL248C                                          | RPA49         | YHR115C                 | DMA1          |
| YJL154C                                          | VPS35         | YHR178W                 | STB5          |
| YOR127W                                          | RGA1          | YPL105C                 | YPL105C       |
| YOR107W                                          | RGS2          | YJL106W                 | IME2          |
| YNL106C                                          | INP52         | YNL107W                 | YAF9          |
| YOR290C                                          | SNF2          | YER162C                 | RAD4          |
| YNL166C                                          | BNI5          | YOL067C                 | RTG1          |
| YAL010C                                          | MDM10         | YNL116W                 | DMA2          |
| YKL048C                                          | ELM1          | YAL002W                 | VPS8          |
| YOR332W                                          | VMA4          | YKR001C                 | VPS1          |
| YDR103W                                          | STE5          | YPR046W                 | MCM16         |
| YFR010W                                          | UBP6          | YJR056C                 | YJR056C       |
| YFR031C-A                                        | RPL2A         | YER139C                 | YER139C       |
| YKL110C                                          | KTI12         | YLR315W                 | NKP2          |



| Predictions at threshold level 0.75 continued... |               |                         |               |
|--------------------------------------------------|---------------|-------------------------|---------------|
| Gene1 of predicted pair                          |               | Gene2 of predicted pair |               |
| Systematic Name                                  | Standard Name | Systematic Name         | Standard Name |
| YMR004W                                          | MVP1          | YDL006W                 | PTC1          |
| YJR063W                                          | RPA12         | YFR030W                 | MET10         |
| YPR030W                                          | CSR2          | YLR093C                 | NYV1          |
| YMR039C                                          | SUB1          | YER161C                 | SPT2          |
| YOR101W                                          | RAS1          | YGR188C                 | BUB1          |
| YGL133W                                          | ITC1          | YBR200W                 | BEM1          |
| YEL050C                                          | RML2          | YML016C                 | PPZ1          |
| YHR200W                                          | RPN10         | YLR398C                 | SKI2          |
| YIL076W                                          | SEC28         | YJL183W                 | MNN11         |
| YMR216C                                          | SKY1          | YKR030W                 | GMH1          |
| YBR215W                                          | HPC2          | YER161C                 | SPT2          |
| YHR081W                                          | LRP1          | YEL060C                 | PRB1          |
| YGL223C                                          | COG1          | YNL297C                 | MON2          |
| YMR164C                                          | MSS11         | YOR358W                 | HAP5          |
| YLR447C                                          | VMA6          | YHR060W                 | VMA22         |
| YOR132W                                          | VPS17         | YMR127C                 | SAS2          |
| YNL291C                                          | MID1          | YOR112W                 | CEX1          |
| YML103C                                          | NUP188        | YPL253C                 | VIK1          |
| YPR030W                                          | CSR2          | YER122C                 | GLO3          |
| YDR108W                                          | GSG1          | YOR106W                 | VAM3          |
| YNL044W                                          | YIP3          | YDL077C                 | VAM6          |
| YNL153C                                          | GIM3          | YGL190C                 | CDC55         |
| YBR171W                                          | SEC66         | YML067C                 | ERV41         |
| YKL135C                                          | APL2          | YHR161C                 | YAP1801       |
| YBL025W                                          | RRN10         | YNL076W                 | MKS1          |
| YPL037C                                          | EGD1          | YEL051W                 | VMA8          |
| YDL116W                                          | NUP84         | YOR001W                 | RRP6          |
| YEL065W                                          | SIT1          | YNL087W                 | TCB2          |
| YPL253C                                          | VIK1          | YOL091W                 | SPO21         |

| Predictions at threshold level 0.75 continued... |               |                         |               |
|--------------------------------------------------|---------------|-------------------------|---------------|
| Gene1 of predicted pair                          |               | Gene2 of predicted pair |               |
| Systematic Name                                  | Standard Name | Systematic Name         | Standard Name |
| YDL223C                                          | HBT1          | YMR133W                 | REC114        |
| YHR152W                                          | SPO12         | YBL087C                 | RPL23A        |
| YMR172W                                          | HOT1          | YHR134W                 | WSS1          |
| YOR076C                                          | SKI7          | YHR081W                 | LRP1          |
| YGR129W                                          | SYF2          | YBR188C                 | NTC20         |
| YLR371W                                          | ROM2          | YBR082C                 | UBC4          |
| YJL058C                                          | BIT61         | YDR171W                 | HSP42         |
| YDL020C                                          | RPN4          | YHR134W                 | WSS1          |
| YDR225W                                          | HTA1          | YNL307C                 | MCK1          |
| YCL037C                                          | SRO9          | YJR040W                 | GEF1          |
| YFR032C-A                                        | RPL29         | YMR116C                 | ASC1          |
| YMR311C                                          | GLC8          | YEL036C                 | ANP1          |
| YHR156C                                          | LIN1          | YDR261C                 | EXG2          |
| YPL195W                                          | APL5          | YJL095W                 | BCK1          |
| YEL065W                                          | SIT1          | YER044C                 | ERG28         |
| YJR063W                                          | RPA12         | YIR005W                 | IST3          |
| YDR335W                                          | MSN5          | YFR034C                 | PHO4          |
| YPL161C                                          | BEM4          | YDR218C                 | SPR28         |
| YLR320W                                          | MMS22         | YDL083C                 | RPS16B        |
| YGR020C                                          | VMA7          | YKR001C                 | VPS1          |
| YLR079W                                          | SIC1          | YEL036C                 | ANP1          |
| YMR153W                                          | NUP53         | YER044C                 | ERG28         |
| YBL079W                                          | NUP170        | YLR410W                 | VIP1          |
| YPR046W                                          | MCM16         | YOL054W                 | PSH1          |
| YFR010W                                          | UBP6          | YER122C                 | GLO3          |
| YGL060W                                          | YBP2          | YEL050C                 | RML2          |
| YGL025C                                          | PGD1          | YLR093C                 | NYV1          |
| YBR084C-A                                        | RPL19A        | YKR048C                 | NAP1          |
| YDL161W                                          | ENT1          | YKR001C                 | VPS1          |

| Predictions at threshold level 0.75 continued... |               |                         |               |
|--------------------------------------------------|---------------|-------------------------|---------------|
| Gene1 of predicted pair                          |               | Gene2 of predicted pair |               |
| Systematic Name                                  | Standard Name | Systematic Name         | Standard Name |
| YKR035W-A                                        | DID2          | YDR358W                 | GGA1          |
| YDR507C                                          | GIN4          | YKL101W                 | HSL1          |
| YBR258C                                          | SHG1          | YDR469W                 | SDC1          |
| YAL024C                                          | LTE1          | YDR260C                 | SWM1          |
| YLR119W                                          | SRN2          | YOR270C                 | VPH1          |
| YDR254W                                          | CHL4          | YNL107W                 | YAF9          |
| YNL068C                                          | FKH2          | YBL047C                 | EDE1          |
| YLR320W                                          | MMS22         | YGL124C                 | MON1          |
| YBR239C                                          | YBR239C       | YPL246C                 | RBD2          |
| YJL172W                                          | CPS1          | YEL053C                 | MAK10         |
| YFL023W                                          | BUD27         | YHR060W                 | VMA22         |
| YDL160C                                          | DHH1          | YER129W                 | SAK1          |
| YJL080C                                          | SCP160        | YPR119W                 | CLB2          |
| YCR084C                                          | TUP1          | YBR089C-A               | NHP6B         |
| YLR337C                                          | VRP1          | YLR360W                 | VPS38         |
| YOR033C                                          | EXO1          | YFL023W                 | BUD27         |
| YHL002W                                          | HSE1          | YNR006W                 | VPS27         |
| YLR441C                                          | RPS1A         | YDL077C                 | VAM6          |
| YLR452C                                          | SST2          | YHR081W                 | LRP1          |
| YNL106C                                          | INP52         | YPR173C                 | VPS4          |
| YOR193W                                          | PEX27         | YMR204C                 | INP1          |
| YLR095C                                          | IOC2          | YBR217W                 | ATG12         |
| YGL212W                                          | VAM7          | YJR125C                 | ENT3          |
| YNL199C                                          | GCR2          | YKL213C                 | DOA1          |
| YLR083C                                          | EMP70         | YAL002W                 | VPS8          |
| YGL100W                                          | SEH1          | YMR167W                 | MLH1          |
| YJL053W                                          | PEP8          | YCR088W                 | ABP1          |
| YDR183W                                          | PLP1          | YGL253W                 | HXK2          |
| YNL025C                                          | SSN8          | YGL174W                 | BUD13         |

| Predictions at threshold level 0.75 continued... |               |                         |               |
|--------------------------------------------------|---------------|-------------------------|---------------|
| Gene1 of predicted pair                          |               | Gene2 of predicted pair |               |
| Systematic Name                                  | Standard Name | Systematic Name         | Standard Name |
| YKL126W                                          | YPK1          | YMR214W                 | SCJ1          |
| YDL116W                                          | NUP84         | YNL225C                 | CNM67         |
| YDR480W                                          | DIG2          | YMR199W                 | CLN1          |
| YKL007W                                          | CAP1          | YJL095W                 | BCK1          |
| YGR108W                                          | CLB1          | YBR108W                 | YBR108W       |
| YBR127C                                          | VMA2          | YHR039C-A               | VMA10         |
| YOR023C                                          | AHC1          | YOL067C                 | RTG1          |
| YNL166C                                          | BNI5          | YHR111W                 | UBA4          |
| YKL048C                                          | ELM1          | YER040W                 | GLN3          |
| YDL020C                                          | RPN4          | YPL256C                 | CLN2          |
| YGL066W                                          | SGF73         | YOR127W                 | RGA1          |
| YGL151W                                          | NUT1          | YEL056W                 | HAT2          |
| YHL031C                                          | GOS1          | YHR039C-A               | VMA10         |
| YER161C                                          | SPT2          | YGL151W                 | NUT1          |
| YNL223W                                          | ATG4          | YNR007C                 | ATG3          |
| YLR381W                                          | CTF3          | YLR233C                 | EST1          |
| YMR004W                                          | MVP1          | YEL053C                 | MAK10         |
| YLL039C                                          | UBI4          | YPL096C-A               | ERI1          |
| YBR108W                                          | YBR108W       | YOL067C                 | RTG1          |
| YPL096C-A                                        | ERI1          | YER001W                 | MNN1          |
| YMR199W                                          | CLN1          | YNL199C                 | GCR2          |
| YKL139W                                          | CTK1          | YML112W                 | CTK3          |
| YCL027W                                          | FUS1          | YMR109W                 | MYO5          |
| YKR101W                                          | SIR1          | YOR038C                 | HIR2          |
| YPR017C                                          | DSS4          | YAL030W                 | SNC1          |
| YEL065W                                          | SIT1          | YLR093C                 | NYV1          |
| YMR224C                                          | MRE11         | YPR120C                 | CLB5          |
| YNL215W                                          | IES2          | YGL174W                 | BUD13         |
| YJL124C                                          | LSM1          | YNL107W                 | YAF9          |

| Predictions at threshold level 0.75 continued... |               |                         |               |
|--------------------------------------------------|---------------|-------------------------|---------------|
| Gene1 of predicted pair                          |               | Gene2 of predicted pair |               |
| Systematic Name                                  | Standard Name | Systematic Name         | Standard Name |
| YOR324C                                          | FRT1          | YML057W                 | CMP2          |
| YEL065W                                          | SIT1          | YKL048C                 | ELM1          |
| YLR381W                                          | CTF3          | YCR086W                 | CSM1          |
| YML038C                                          | YMD8          | YJR060W                 | CBF1          |
| YMR054W                                          | STV1          | YDL192W                 | ARF1          |
| YHL002W                                          | HSE1          | YAL002W                 | VPS8          |
| YBL106C                                          | SRO77         | YNR049C                 | MSO1          |
| YGL147C                                          | RPL9A         | YER040W                 | GLN3          |
| YLR386W                                          | VAC14         | YML112W                 | CTK3          |
| YDR443C                                          | SSN2          | YNL325C                 | FIG4          |
| YDR363W-A                                        | SEM1          | YPL152W                 | RRD2          |
| YPR131C                                          | NAT3          | YOR368W                 | RAD17         |
| YER143W                                          | DDI1          | YMR017W                 | SPO20         |
| YBL079W                                          | NUP170        | YBR082C                 | UBC4          |
| YNL094W                                          | APP1          | YJL187C                 | SWE1          |
| YMR284W                                          | YKU70         | YDL047W                 | SIT4          |
| YPR030W                                          | CSR2          | YBR036C                 | CSG2          |
| YNL106C                                          | INP52         | YFR010W                 | UBP6          |
| YLR095C                                          | IOC2          | YER162C                 | RAD4          |
| YEL050C                                          | RML2          | YJL124C                 | LSM1          |
| YBL047C                                          | EDE1          | YGR252W                 | GCN5          |
| YMR039C                                          | SUB1          | YBR274W                 | CHK1          |
| YMR127C                                          | SAS2          | YGL151W                 | NUT1          |
| YHR200W                                          | RPN10         | YOR066W                 | MSA1          |
| YNL307C                                          | MCK1          | YML001W                 | YPT7          |
| YBR200W                                          | BEM1          | YGL031C                 | RPL24A        |
| YIR002C                                          | MPH1          | YLR320W                 | MMS22         |
| YER116C                                          | SLX8          | YGR184C                 | UBR1          |
| YOL030W                                          | GAS5          | YGL031C                 | RPL24A        |

| Predictions at threshold level 0.75 continued... |               |                         |               |
|--------------------------------------------------|---------------|-------------------------|---------------|
| Gene1 of predicted pair                          |               | Gene2 of predicted pair |               |
| Systematic Name                                  | Standard Name | Systematic Name         | Standard Name |
| YGL212W                                          | VAM7          | YBR280C                 | SAF1          |
| YLR452C                                          | SST2          | YEL060C                 | PRB1          |
| YFR032C-A                                        | RPL29         | YHR200W                 | RPN10         |
| YLR090W                                          | XDJ1          | YDL192W                 | ARF1          |
| YKL126W                                          | YPK1          | YBL072C                 | RPS8A         |
| YOR195W                                          | SLK19         | YML028W                 | TSA1          |
| YDR254W                                          | CHL4          | YHL002W                 | HSE1          |
| YBR041W                                          | FAT1          | YLR371W                 | ROM2          |
| YGL153W                                          | PEX14         | YPL161C                 | BEM4          |
| YBL008W                                          | HIR1          | YDR073W                 | SNF11         |
| YKR084C                                          | HBS1          | YJL191W                 | RPS14B        |
| YMR152W                                          | YIM1          | YKL140W                 | TGL1          |
| YOR109W                                          | INP53         | YJR040W                 | GEF1          |
| YGL174W                                          | BUD13         | YKL213C                 | DOA1          |
| YPL256C                                          | CLN2          | YDR076W                 | RAD55         |
| YJR063W                                          | RPA12         | YJL006C                 | CTK2          |
| YKL126W                                          | YPK1          | YMR152W                 | YIM1          |
| YDR137W                                          | RGP1          | YHR039C-A               | VMA10         |
| YGR135W                                          | PRE9          | YLR357W                 | RSC2          |
| YLR337C                                          | VRP1          | YDR144C                 | MKC7          |
| YLR093C                                          | NYV1          | YNL076W                 | MKS1          |
| YML038C                                          | YMD8          | YGL115W                 | SNF4          |
| YCR034W                                          | FEN1          | YJR140C                 | HIR3          |
| YLR119W                                          | SRN2          | YGL025C                 | PGD1          |
| YCR086W                                          | CSM1          | YBR082C                 | UBC4          |
| YPL050C                                          | MNN9          | YOR327C                 | SNC2          |
| YBR042C                                          | CST26         | YLR131C                 | ACE2          |
| YLR192C                                          | HCR1          | YBR217W                 | ATG12         |
| YKL101W                                          | HSL1          | YLR350W                 | ORM2          |

| Predictions at threshold level 0.75 continued... |               |                         |               |
|--------------------------------------------------|---------------|-------------------------|---------------|
| Gene1 of predicted pair                          |               | Gene2 of predicted pair |               |
| Systematic Name                                  | Standard Name | Systematic Name         | Standard Name |
| YDL223C                                          | HBT1          | YMR230W                 | RPS10B        |
| YMR152W                                          | YIM1          | YBR036C                 | CSG2          |
| YIL148W                                          | RPL40A        | YKR024C                 | DBP7          |
| YCR066W                                          | RAD18         | YMR054W                 | STV1          |
| YKL139W                                          | CTK1          | YDR207C                 | UME6          |
| YNL325C                                          | FIG4          | YDR310C                 | SUM1          |
| YGL100W                                          | SEH1          | YOL090W                 | MSH2          |
| YIL036W                                          | CST6          | YPL018W                 | CTF19         |
| YDR146C                                          | SWI5          | YDR289C                 | RTT103        |
| YGL078C                                          | DBP3          | YNL238W                 | KEX2          |
| YMR095C                                          | SNO1          | YPL024W                 | RMI1          |
| YBL008W                                          | HIR1          | YGL019W                 | CKB1          |
| YPL137C                                          | GIP3          | YML071C                 | COG8          |
| YBR228W                                          | SLX1          | YOL090W                 | MSH2          |
| YPL234C                                          | TFP3          | YDL006W                 | PTC1          |
| YLR381W                                          | CTF3          | YDL013W                 | SLX5          |
| YKR069W                                          | MET1          | YMR109W                 | MYO5          |
| YJL154C                                          | VPS35         | YGL115W                 | SNF4          |
| YIL159W                                          | BNR1          | YGL025C                 | PGD1          |
| YPL042C                                          | SSN3          | YGL174W                 | BUD13         |
| YDR358W                                          | GGA1          | YEL060C                 | PRB1          |
| YMR016C                                          | SOK2          | YER122C                 | GLO3          |
| YLR337C                                          | VRP1          | YAL002W                 | VPS8          |
| YOR032C                                          | HMS1          | YPR046W                 | MCM16         |
| YLR192C                                          | HCR1          | YPR030W                 | CSR2          |
| YML028W                                          | TSA1          | YDR207C                 | UME6          |
| YER107C                                          | GLE2          | YDR334W                 | SWR1          |
| YHR039C-A                                        | VMA10         | YML071C                 | COG8          |
| YHR013C                                          | ARD1          | YLR254C                 | NDL1          |

| Predictions at threshold level 0.75 continued... |               |                         |               |
|--------------------------------------------------|---------------|-------------------------|---------------|
| Gene1 of predicted pair                          |               | Gene2 of predicted pair |               |
| Systematic Name                                  | Standard Name | Systematic Name         | Standard Name |
| YGR129W                                          | SYF2          | YIR005W                 | IST3          |
| YDR318W                                          | MCM21         | YGL253W                 | HXK2          |
| YGL033W                                          | HOP2          | YHR060W                 | VMA22         |
| YDR443C                                          | SSN2          | YOR327C                 | SNC2          |
| YDR254W                                          | CHL4          | YDR076W                 | RAD55         |
| YNL215W                                          | IES2          | YKR061W                 | KTR2          |
| YPR017C                                          | DSS4          | YJL036W                 | SNX4          |
| YOR001W                                          | RRP6          | YLR410W                 | VIP1          |
| YMR095C                                          | SNO1          | YCR053W                 | THR4          |
| YNL107W                                          | YAF9          | YKR030W                 | GMH1          |
| YLR090W                                          | XDJ1          | YBR173C                 | UMP1          |
| YBR200W                                          | BEM1          | YPL152W                 | RRD2          |
| YDR129C                                          | SAC6          | YGL200C                 | EMP24         |
| YMR202W                                          | ERG2          | YBR215W                 | HPC2          |
| YPR036W                                          | VMA13         | YNL307C                 | MCK1          |
| YIL076W                                          | SEC28         | YJL004C                 | SYS1          |
| YKL139W                                          | CTK1          | YDR289C                 | RTT103        |
| YGL237C                                          | HAP2          | YDR469W                 | SDC1          |
| YJL204C                                          | RCY1          | YDR131C                 | YDR131C       |
| YDR202C                                          | RAV2          | YDR153C                 | ENT5          |
| YDR245W                                          | MNN10         | YOR035C                 | SHE4          |
| YHL031C                                          | GOS1          | YEL043W                 | YEL043W       |
| YFR010W                                          | UBP6          | YLR452C                 | SST2          |
| YDR383C                                          | NKP1          | YJL124C                 | LSM1          |
| YGL033W                                          | HOP2          | YML001W                 | YPT7          |
| YPL050C                                          | MNN9          | YML067C                 | ERV41         |
| YDL013W                                          | SLX5          | YHR200W                 | RPN10         |
| YPR017C                                          | DSS4          | YPL037C                 | EGD1          |
| YPL161C                                          | BEM4          | YBR114W                 | RAD16         |



| Predictions at threshold level 0.75 continued... |               |                         |               |
|--------------------------------------------------|---------------|-------------------------|---------------|
| Gene1 of predicted pair                          |               | Gene2 of predicted pair |               |
| Systematic Name                                  | Standard Name | Systematic Name         | Standard Name |
| YPL234C                                          | TFP3          | YJL004C                 | SYS1          |
| YLR292C                                          | SEC72         | YNL166C                 | BNI5          |
| YLR410W                                          | VIP1          | YGR188C                 | BUB1          |
| YLR102C                                          | APC9          | YKR057W                 | RPS21A        |
| YPL057C                                          | SUR1          | YBR280C                 | SAF1          |
| YNL325C                                          | FIG4          | YDR358W                 | GGA1          |
| YGL033W                                          | HOP2          | YPR046W                 | MCM16         |
| YAL024C                                          | LTE1          | YHR156C                 | LIN1          |
| YGR249W                                          | MGA1          | YER044C                 | ERG28         |
| YJR056C                                          | YJR056C       | YLR398C                 | SKI2          |
| YJL124C                                          | LSM1          | YBR195C                 | MSI1          |
| YOR080W                                          | DIA2          | YDR335W                 | MSN5          |
| YML115C                                          | VAN1          | YKL101W                 | HSL1          |
| YMR198W                                          | CIK1          | YLR429W                 | CRN1          |
| YDR156W                                          | RPA14         | YHR111W                 | UBA4          |
| YMR133W                                          | REC114        | YMR230W                 | RPS10B        |
| YIL036W                                          | CST6          | YPL180W                 | TCO89         |
| YLR192C                                          | HCR1          | YNL058C                 | YNL058C       |
| YJL183W                                          | MNN11         | YDL192W                 | ARF1          |
| YDR146C                                          | SWI5          | YKL161C                 | YKL161C       |
| YDR137W                                          | RGP1          | YGL115W                 | SNF4          |
| YLR441C                                          | RPS1A         | YJR084W                 | CSN12         |
| YLR083C                                          | EMP70         | YHL031C                 | GOS1          |
| YML103C                                          | NUP188        | YML016C                 | PPZ1          |
| YIL148W                                          | RPL40A        | YML057W                 | CMP2          |
| YLR360W                                          | VPS38         | YJL036W                 | SNX4          |
| YOR039W                                          | CKB2          | YDR310C                 | SUM1          |
| YLR079W                                          | SIC1          | YMR055C                 | BUB2          |
| YNL054W                                          | VAC7          | YFR036W                 | CDC26         |

| Predictions at threshold level 0.75 continued... |               |                         |               |
|--------------------------------------------------|---------------|-------------------------|---------------|
| Gene1 of predicted pair                          |               | Gene2 of predicted pair |               |
| Systematic Name                                  | Standard Name | Systematic Name         | Standard Name |
| YIR005W                                          | IST3          | YAL002W                 | VPS8          |
| YLR192C                                          | HCR1          | YOR043W                 | WHI2          |
| YPL253C                                          | VIK1          | YDR310C                 | SUM1          |
| YDR335W                                          | MSN5          | YER122C                 | GLO3          |
| YEL022W                                          | GEA2          | YDL137W                 | ARF2          |
| YHR156C                                          | LIN1          | YKR099W                 | BAS1          |
| YGR020C                                          | VMA7          | YPL037C                 | EGD1          |
| YMR199W                                          | CLN1          | YFR040W                 | SAP155        |
| YJR060W                                          | CBF1          | YAR014C                 | BUD14         |
| YBR108W                                          | YBR108W       | YOR358W                 | HAP5          |
| YNL051W                                          | COG5          | YOL108C                 | INO4          |
| YLR079W                                          | SIC1          | YDR310C                 | SUM1          |
| YFR031C-A                                        | RPL2A         | YBR126C                 | TPS1          |
| YMR199W                                          | CLN1          | YGL016W                 | KAP122        |
| YPL129W                                          | TAF14         | YOR064C                 | YNG1          |
| YLR095C                                          | IOC2          | YGL033W                 | HOP2          |
| YDR443C                                          | SSN2          | YNL206C                 | RTT106        |
| YER087C-B                                        | SBH1          | YPR141C                 | KAR3          |
| YOR156C                                          | NFI1          | YPL161C                 | BEM4          |
| YKL139W                                          | CTK1          | YMR152W                 | YIM1          |
| YDL077C                                          | VAM6          | YCR053W                 | THR4          |
| YDL184C                                          | RPL41A        | YGL115W                 | SNF4          |
| YNL106C                                          | INP52         | YAR014C                 | BUD14         |
| YMR198W                                          | CIK1          | YNL307C                 | MCK1          |
| YDL020C                                          | RPN4          | YHR060W                 | VMA22         |
| YGL223C                                          | COG1          | YBR171W                 | SEC66         |
| YDR443C                                          | SSN2          | YPL203W                 | TPK2          |
| YGR019W                                          | UGA1          | YJR032W                 | CPR7          |
| YKL048C                                          | ELM1          | YBR280C                 | SAF1          |

| Predictions at threshold level 0.75 continued... |               |                         |               |
|--------------------------------------------------|---------------|-------------------------|---------------|
| Gene1 of predicted pair                          |               | Gene2 of predicted pair |               |
| Systematic Name                                  | Standard Name | Systematic Name         | Standard Name |
| YLR386W                                          | VAC14         | YGL124C                 | MON1          |
| YMR055C                                          | BUB2          | YEL056W                 | HAT2          |
| YLR421C                                          | RPN13         | YGR232W                 | NAS6          |
| YDL116W                                          | NUP84         | YJL187C                 | SWE1          |
| YJR063W                                          | RPA12         | YGL252C                 | RTG2          |
| YDR477W                                          | SNF1          | YBR036C                 | CSG2          |
| YJL136C                                          | RPS21B        | YNL229C                 | URE2          |
| YCR086W                                          | CSM1          | YML028W                 | TSA1          |
| YPL234C                                          | TFP3          | YNR032W                 | PPG1          |
| YOL067C                                          | RTG1          | YGR188C                 | BUB1          |
| YKR020W                                          | VPS51         | YJR084W                 | CSN12         |
| YAL024C                                          | LTE1          | YIL036W                 | CST6          |
| YLR452C                                          | SST2          | YMR311C                 | GLC8          |
| YKL010C                                          | UFD4          | YJL006C                 | CTK2          |
| YMR152W                                          | YIM1          | YDR207C                 | UME6          |
| YCR086W                                          | CSM1          | YOR141C                 | ARP8          |
| YDR293C                                          | SSD1          | YKL074C                 | MUD2          |
| YMR142C                                          | RPL13B        | YER144C                 | UBP5          |
| YJL138C                                          | TIF2          | YJR032W                 | CPR7          |
| YBR171W                                          | SEC66         | YNL079C                 | TPM1          |
| YIL053W                                          | RHR2          | YOL121C                 | RPS19A        |
| YBR041W                                          | FAT1          | YGR192C                 | TDH3          |
| YGL212W                                          | VAM7          | YNL107W                 | YAF9          |
| YER110C                                          | KAP123        | YPL178W                 | CBC2          |
| YKR059W                                          | TIF1          | YBR274W                 | CHK1          |
| YNL201C                                          | PSY2          | YDR318W                 | MCM21         |
| YLR234W                                          | TOP3          | YOR358W                 | HAP5          |
| YGL124C                                          | MON1          | YMR214W                 | SCJ1          |
| YBR200W                                          | BEM1          | YCR053W                 | THR4          |

| Predictions at threshold level 0.75 continued... |               |                         |               |
|--------------------------------------------------|---------------|-------------------------|---------------|
| Gene1 of predicted pair                          |               | Gene2 of predicted pair |               |
| Systematic Name                                  | Standard Name | Systematic Name         | Standard Name |
| YDR261C                                          | EXG2          | YMR311C                 | GLC8          |
| YMR216C                                          | SKY1          | YER120W                 | SCS2          |
| YNL291C                                          | MID1          | YDR076W                 | RAD55         |
| YNL325C                                          | FIG4          | YFL023W                 | BUD27         |
| YOR127W                                          | RGA1          | YNL166C                 | BNI5          |
| YGL163C                                          | RAD54         | YDL047W                 | SIT4          |
| YNL297C                                          | MON2          | YHR012W                 | VPS29         |
| YJL006C                                          | CTK2          | YJR135C                 | MCM22         |
| YLR320W                                          | MMS22         | YML001W                 | YPT7          |
| YDR289C                                          | RTT103        | YGL252C                 | RTG2          |
| YDR192C                                          | NUP42         | YNL049C                 | SFB2          |
| YGL025C                                          | PGD1          | YPL195W                 | APL5          |
| YML115C                                          | VAN1          | YNL041C                 | COG6          |
| YPL253C                                          | VIK1          | YKL110C                 | KTI12         |
| YHR216W                                          | IMD2          | YML056C                 | IMD4          |
| YNL238W                                          | KEX2          | YOL081W                 | IRA2          |
| YDL161W                                          | ENT1          | YDR358W                 | GGA1          |
| YGR081C                                          | SLX9          | YML028W                 | TSA1          |
| YMR095C                                          | SNO1          | YGL124C                 | MON1          |
| YNL025C                                          | SSN8          | YNL215W                 | IES2          |
| YGR071C                                          | YGR071C       | YBR036C                 | CSG2          |
| YBR200W                                          | BEM1          | YML109W                 | ZDS2          |
| YMR284W                                          | YKU70         | YHR056C                 | RSC30         |
| YNL031C                                          | HHT2          | YLR182W                 | SWI6          |
| YPL024W                                          | RMI1          | YBR274W                 | CHK1          |
| YHR013C                                          | ARD1          | YJR063W                 | RPA12         |
| YPL024W                                          | RMI1          | YIL076W                 | SEC28         |
| YGR072W                                          | UPF3          | YML038C                 | YMD8          |
| YHL011C                                          | PRS3          | YPR119W                 | CLB2          |

| Predictions at threshold level 0.75 continued... |               |                         |               |
|--------------------------------------------------|---------------|-------------------------|---------------|
| Gene1 of predicted pair                          |               | Gene2 of predicted pair |               |
| Systematic Name                                  | Standard Name | Systematic Name         | Standard Name |
| YOR106W                                          | VAM3          | YDR137W                 | RGP1          |
| YJR032W                                          | CPR7          | YKL119C                 | VPH2          |
| YDR439W                                          | LRS4          | YNL248C                 | RPA49         |
| YML115C                                          | VAN1          | YNL087W                 | TCB2          |
| YBR030W                                          | YBR030W       | YGL025C                 | PGD1          |
| YOR066W                                          | MSA1          | YOL121C                 | RPS19A        |
| YDL161W                                          | ENT1          | YBL047C                 | EDE1          |
| YGL019W                                          | CKB1          | YDR310C                 | SUM1          |
| YAL024C                                          | LTE1          | YOR213C                 | SAS5          |
| YOR327C                                          | SNC2          | YAL002W                 | VPS8          |
| YPR018W                                          | RLF2          | YJR090C                 | GRR1          |
| YDR320C                                          | SWA2          | YDR080W                 | VPS41         |
| YJR040W                                          | GEF1          | YKR030W                 | GMH1          |
| YOR308C                                          | SNU66         | YEL013W                 | VAC8          |
| YNL058C                                          | YNL058C       | YCR053W                 | THR4          |
| YIL053W                                          | RHR2          | YER162C                 | RAD4          |
| YNL215W                                          | IES2          | YNL307C                 | MCK1          |
| YBL019W                                          | APN2          | YDL047W                 | SIT4          |
| YLR090W                                          | XDJ1          | YJL095W                 | BCK1          |
| YLR006C                                          | SSK1          | YBR200W                 | BEM1          |
| YBR108W                                          | YBR108W       | YBR171W                 | SEC66         |
| YDR507C                                          | GIN4          | YGL190C                 | CDC55         |
| YHR119W                                          | SET1          | YJL168C                 | SET2          |
| YBR042C                                          | CST26         | YDR385W                 | EFT2          |
| YOR332W                                          | VMA4          | YLR447C                 | VMA6          |
| YOR023C                                          | AHC1          | YNL107W                 | YAF9          |
| YDR443C                                          | SSN2          | YNL087W                 | TCB2          |
| YMR198W                                          | CIK1          | YKR014C                 | YPT52         |
| YML016C                                          | PPZ1          | YHL011C                 | PRS3          |

| Predictions at threshold level 0.75 continued... |               |                         |               |
|--------------------------------------------------|---------------|-------------------------|---------------|
| Gene1 of predicted pair                          |               | Gene2 of predicted pair |               |
| Systematic Name                                  | Standard Name | Systematic Name         | Standard Name |
| YHL020C                                          | OPI1          | YPL120W                 | VPS30         |
| YLR371W                                          | ROM2          | YJL183W                 | MNN11         |
| YDR479C                                          | PEX29         | YBR168W                 | PEX32         |
| YDR293C                                          | SSD1          | YGL054C                 | ERV14         |
| YLR083C                                          | EMP70         | YDR207C                 | UME6          |
| YDR320C                                          | SWA2          | YDR153C                 | ENT5          |
| YGL153W                                          | PEX14         | YGR135W                 | PRE9          |
| YMR224C                                          | MRE11         | YBR082C                 | UBC4          |
| YLR090W                                          | XDJ1          | YGR249W                 | MGA1          |
| YFR036W                                          | CDC26         | YDR207C                 | UME6          |
| YDR174W                                          | HMO1          | YPL152W                 | RRD2          |
| YLR441C                                          | RPS1A         | YFR036W                 | CDC26         |
| YNL041C                                          | COG6          | YCR053W                 | THR4          |
| YJR063W                                          | RPA12         | YGR188C                 | BUB1          |
| YHL031C                                          | GOS1          | YBR171W                 | SEC66         |
| YGR261C                                          | APL6          | YDL077C                 | VAM6          |
| YOR083W                                          | WHI5          | YPL106C                 | SSE1          |
| YBR173C                                          | UMP1          | YHR200W                 | RPN10         |
| YOR275C                                          | RIM20         | YJL183W                 | MNN11         |
| YGR249W                                          | MGA1          | YNL076W                 | MKS1          |
| YCR077C                                          | PAT1          | YJL183W                 | MNN11         |
| YJL124C                                          | LSM1          | YJR035W                 | RAD26         |
| YMR095C                                          | SNO1          | YBR280C                 | SAF1          |
| YOR337W                                          | TEA1          | YER044C                 | ERG28         |
| YNL215W                                          | IES2          | YDR183W                 | PLP1          |
| YKR001C                                          | VPS1          | YOR036W                 | PEP12         |
| YLR396C                                          | VPS33         | YAL030W                 | SNC1          |
| YLR095C                                          | IOC2          | YLR320W                 | MMS22         |
| YMR152W                                          | YIM1          | YDR310C                 | SUM1          |

| Predictions at threshold level 0.75 continued... |               |                         |               |
|--------------------------------------------------|---------------|-------------------------|---------------|
| Gene1 of predicted pair                          |               | Gene2 of predicted pair |               |
| Systematic Name                                  | Standard Name | Systematic Name         | Standard Name |
| YMR080C                                          | NAM7          | YGR072W                 | UPF3          |
| YPL018W                                          | CTF19         | YDR183W                 | PLP1          |
| YLL007C                                          | YLL007C       | YLR360W                 | VPS38         |
| YLR090W                                          | XDJ1          | YMR026C                 | PEX12         |
| YMR201C                                          | RAD14         | YBR114W                 | RAD16         |
| YLR452C                                          | SST2          | YOL018C                 | TLG2          |
| YPL161C                                          | BEM4          | YOL081W                 | IRA2          |
| YGR054W                                          | YGR054W       | YDR183W                 | PLP1          |
| YLR381W                                          | CTF3          | YIL008W                 | URM1          |
| YJL190C                                          | RPS22A        | YHR114W                 | BZZ1          |
| YOL111C                                          | MDY2          | YPR030W                 | CSR2          |
| YNL297C                                          | MON2          | YDR153C                 | ENT5          |
| YBL101C                                          | ECM21         | YJL095W                 | BCK1          |
| YLR337C                                          | VRP1          | YJR090C                 | GRR1          |
| YOL126C                                          | MDH2          | YMR153W                 | NUP53         |
| YGR249W                                          | MGA1          | YOR290C                 | SNF2          |
| YPR131C                                          | NAT3          | YPL256C                 | CLN2          |
| YFR032C-A                                        | RPL29         | YKR020W                 | VPS51         |
| YDL059C                                          | RAD59         | YOR368W                 | RAD17         |
| YOR047C                                          | STD1          | YDL194W                 | SNF3          |
| YHR134W                                          | WSS1          | YPR046W                 | MCM16         |
| YPL161C                                          | BEM4          | YJL095W                 | BCK1          |
| YDR129C                                          | SAC6          | YFR036W                 | CDC26         |
| YER120W                                          | SCS2          | YOL108C                 | INO4          |
| YGL175C                                          | SAE2          | YMR038C                 | CCS1          |
| YOL051W                                          | GAL11         | YLR182W                 | SWI6          |
| YMR231W                                          | PEP5          | YAL002W                 | VPS8          |
| YFR010W                                          | UBP6          | YNL307C                 | MCK1          |
| YDR293C                                          | SSD1          | YLR447C                 | VMA6          |

| Predictions at threshold level 0.75 continued... |               |                         |               |
|--------------------------------------------------|---------------|-------------------------|---------------|
| Gene1 of predicted pair                          |               | Gene2 of predicted pair |               |
| Systematic Name                                  | Standard Name | Systematic Name         | Standard Name |
| YER139C                                          | YER139C       | YMR214W                 | SCJ1          |
| YGR003W                                          | CUL3          | YDR139C                 | RUB1          |
| YOR127W                                          | RGA1          | YMR004W                 | MVP1          |
| YER044C                                          | ERG28         | YDR310C                 | SUM1          |
| YGL147C                                          | RPL9A         | YMR153W                 | NUP53         |
| YDR439W                                          | LRS4          | YFR030W                 | MET10         |
| YMR164C                                          | MSS11         | YCR024C-A               | PMP1          |
| YLR233C                                          | EST1          | YDR310C                 | SUM1          |
| YPL057C                                          | SUR1          | YKL213C                 | DOA1          |
| YLL007C                                          | YLL007C       | YPR051W                 | MAK3          |
| YDR146C                                          | SWI5          | YOR043W                 | WHI2          |
| YMR216C                                          | SKY1          | YGR006W                 | PRP18         |
| YOR371C                                          | GPB1          | YPR119W                 | CLB2          |
| YHR152W                                          | SPO12         | YPR111W                 | DBF20         |
| YDL101C                                          | DUN1          | YBR228W                 | SLX1          |
| YNL041C                                          | COG6          | YLR093C                 | NYV1          |
| YFL013C                                          | IES1          | YOR308C                 | SNU66         |
| YHR111W                                          | UBA4          | YJL187C                 | SWE1          |
| YOR106W                                          | VAM3          | YEL043W                 | YEL043W       |
| YNL069C                                          | RPL16B        | YOR109W                 | INP53         |
| YPR131C                                          | NAT3          | YDR076W                 | RAD55         |
| YDR443C                                          | SSN2          | YLR360W                 | VPS38         |
| YIL079C                                          | AIR1          | YGR152C                 | RSR1          |
| YML109W                                          | ZDS2          | YNL293W                 | MSB3          |
| YGL133W                                          | ITC1          | YOR195W                 | SLK19         |
| YBR171W                                          | SEC66         | YGL115W                 | SNF4          |
| YOR290C                                          | SNF2          | YLR452C                 | SST2          |
| YOL051W                                          | GAL11         | YDL005C                 | MED2          |
| YPR131C                                          | NAT3          | YBL079W                 | NUP170        |



| Predictions at threshold level 0.75 continued... |               |                         |               |
|--------------------------------------------------|---------------|-------------------------|---------------|
| Gene1 of predicted pair                          |               | Gene2 of predicted pair |               |
| Systematic Name                                  | Standard Name | Systematic Name         | Standard Name |
| YDR129C                                          | SAC6          | YML097C                 | VPS9          |
| YPR036W                                          | VMA13         | YOR327C                 | SNC2          |
| YBL051C                                          | PIN4          | YDR310C                 | SUM1          |
| YDR137W                                          | RGP1          | YDR378C                 | LSM6          |
| YDL056W                                          | MBP1          | YLR182W                 | SWI6          |
| YER042W                                          | MXR1          | YLR093C                 | NYV1          |
| YDR443C                                          | SSN2          | YDR261C                 | EXG2          |
| YIL103W                                          | DPH1          | YDR289C                 | RTT103        |
| YKR046C                                          | PET10         | YMR313C                 | TGL3          |
| YPL240C                                          | HSP82         | YDR026C                 | YDR026C       |
| YGR019W                                          | UGA1          | YBR107C                 | IML3          |
| YCR066W                                          | RAD18         | YEL051W                 | VMA8          |
| YNL166C                                          | BNI5          | YGR054W                 | YGR054W       |
| YNL218W                                          | MGS1          | YKR072C                 | SIS2          |
| YIL159W                                          | BNR1          | YML001W                 | YPT7          |
| YGR020C                                          | VMA7          | YNL107W                 | YAF9          |
| YOR014W                                          | RTS1          | YDR207C                 | UME6          |
| YEL053C                                          | MAK10         | YJL183W                 | MNN11         |
| YJL172W                                          | CPS1          | YDL083C                 | RPS16B        |
| YOR066W                                          | MSA1          | YBL025W                 | RRN10         |
| YIL038C                                          | NOT3          | YBR089C-A               | NHP6B         |
| YNL297C                                          | MON2          | YOL108C                 | INO4          |
| YHR156C                                          | LIN1          | YBR200W                 | BEM1          |
| YOR069W                                          | VPS5          | YHR039C-A               | VMA10         |
| YNL025C                                          | SSN8          | YDL002C                 | NHP10         |
| YJR099W                                          | YUH1          | YDR139C                 | RUB1          |
| YNL248C                                          | RPA49         | YML112W                 | CTK3          |
| YIR005W                                          | IST3          | YDR289C                 | RTT103        |
| YKL032C                                          | IXR1          | YPL213W                 | LEA1          |

| Predictions at threshold level 0.75 continued... |               |                         |               |
|--------------------------------------------------|---------------|-------------------------|---------------|
| Gene1 of predicted pair                          |               | Gene2 of predicted pair |               |
| Systematic Name                                  | Standard Name | Systematic Name         | Standard Name |
| YMR179W                                          | SPT21         | YGL163C                 | RAD54         |
| YKL126W                                          | YPK1          | YPL161C                 | BEM4          |
| YGR072W                                          | UPF3          | YNL238W                 | KEX2          |
| YJL053W                                          | PEP8          | YGL054C                 | ERV14         |
| YHR052W                                          | CIC1          | YPR154W                 | PIN3          |
| YMR199W                                          | CLN1          | YKL032C                 | IXR1          |
| YHR098C                                          | SFB3          | YMR048W                 | CSM3          |
| YFR036W                                          | CDC26         | YBR280C                 | SAF1          |
| YMR142C                                          | RPL13B        | YOR327C                 | SNC2          |
| YLL007C                                          | YLL007C       | YBR108W                 | YBR108W       |
| YGL250W                                          | RMR1          | YDR318W                 | MCM21         |
| YLR090W                                          | XDJ1          | YLR095C                 | IOC2          |
| YOR132W                                          | VPS17         | YDR144C                 | MKC7          |
| YJR060W                                          | CBF1          | YOR327C                 | SNC2          |
| YNL041C                                          | COG6          | YPR030W                 | CSR2          |
| YNL248C                                          | RPA49         | YOL081W                 | IRA2          |
| YFR031C-A                                        | RPL2A         | YIL053W                 | RHR2          |
| YNL291C                                          | MID1          | YOR327C                 | SNC2          |
| YOR270C                                          | VPH1          | YKL119C                 | VPH2          |
| YOR112W                                          | CEX1          | YDR108W                 | GSG1          |
| YDR183W                                          | PLP1          | YNL107W                 | YAF9          |
| YDR225W                                          | HTA1          | YNL107W                 | YAF9          |
| YEL042W                                          | GDA1          | YER122C                 | GLO3          |
| YGL087C                                          | MMS2          | YMR172W                 | HOT1          |
| YPL057C                                          | SUR1          | YML028W                 | TSA1          |
| YER110C                                          | KAP123        | YDR254W                 | CHL4          |
| YMR284W                                          | YKU70         | YGL175C                 | SAE2          |
| YHR039C-A                                        | VMA10         | YML001W                 | YPT7          |
| YKL048C                                          | ELM1          | YBR036C                 | CSG2          |

| Predictions at threshold level 0.75 continued... |               |                         |               |
|--------------------------------------------------|---------------|-------------------------|---------------|
| Gene1 of predicted pair                          |               | Gene2 of predicted pair |               |
| Systematic Name                                  | Standard Name | Systematic Name         | Standard Name |
| YGR135W                                          | PRE9          | YKR030W                 | GMH1          |
| YOR043W                                          | WHI2          | YGR071C                 | YGR071C       |
| YLR441C                                          | RPS1A         | YER102W                 | RPS8B         |
| YJR056C                                          | YJR056C       | YPL057C                 | SUR1          |
| YIL076W                                          | SEC28         | YMR133W                 | REC114        |
| YJR140C                                          | HIR3          | YGL148W                 | ARO2          |
| YPR051W                                          | MAK3          | YCL001W                 | RER1          |
| YML115C                                          | VAN1          | YGR217W                 | CCH1          |
| YGR241C                                          | YAP1802       | YDL226C                 | GCS1          |
| YLR292C                                          | SEC72         | YMR127C                 | SAS2          |
| YPR084W                                          | YPR084W       | YHR060W                 | VMA22         |
| YEL051W                                          | VMA8          | YKR030W                 | GMH1          |
| YEL009C                                          | GCN4          | YNL236W                 | SIN4          |
| YJL127C                                          | SPT10         | YPL253C                 | VIK1          |
| YNL243W                                          | SLA2          | YMR070W                 | MOT3          |
| YPL057C                                          | SUR1          | YJL095W                 | BCK1          |
| YJL172W                                          | CPS1          | YGL124C                 | MON1          |
| YLR429W                                          | CRN1          | YNL107W                 | YAF9          |
| YKL032C                                          | IXR1          | YGL153W                 | PEX14         |
| YAL020C                                          | ATS1          | YJL095W                 | BCK1          |
| YBR200W                                          | BEM1          | YER139C                 | YER139C       |
| YHR073W                                          | OSH3          | YLR079W                 | SIC1          |
| YML071C                                          | COG8          | YBR082C                 | UBC4          |
| YNL215W                                          | IES2          | YIR005W                 | IST3          |
| YBR041W                                          | FAT1          | YJL117W                 | PHO86         |
| YCL037C                                          | SRO9          | YPL161C                 | BEM4          |
| YKL110C                                          | KTI12         | YPL018W                 | CTF19         |
| YBR194W                                          | SOY1          | YMR089C                 | YTA12         |
| YGL115W                                          | SNF4          | YMR311C                 | GLC8          |

| Predictions at threshold level 0.75 continued... |               |                         |               |
|--------------------------------------------------|---------------|-------------------------|---------------|
| Gene1 of predicted pair                          |               | Gene2 of predicted pair |               |
| Systematic Name                                  | Standard Name | Systematic Name         | Standard Name |
| YBR126C                                          | TPS1          | YMR214W                 | SCJ1          |
| YDR260C                                          | SWM1          | YJR135C                 | MCM22         |
| YPL042C                                          | SSN3          | YNL236W                 | SIN4          |
| YJL154C                                          | VPS35         | YAL002W                 | VPS8          |
| YJL095W                                          | BCK1          | YLR180W                 | SAM1          |
| YIR003W                                          | YIR003W       | YNL094W                 | APP1          |
| YNL238W                                          | KEX2          | YNL076W                 | MKS1          |
| YLR181C                                          | VTA1          | YKL041W                 | VPS24         |
| YFR031C-A                                        | RPL2A         | YPL195W                 | APL5          |
| YPL161C                                          | BEM4          | YNL289W                 | PCL1          |
| YFR031C-A                                        | RPL2A         | YKL126W                 | YPK1          |
| YOL051W                                          | GAL11         | YNL079C                 | TPM1          |
| YPL042C                                          | SSN3          | YML062C                 | MFT1          |
| YDR477W                                          | SNF1          | YBR019C                 | GAL10         |
| YJR140C                                          | HIR3          | YBR036C                 | CSG2          |
| YOL018C                                          | TLG2          | YJL164C                 | TPK1          |
| YPR084W                                          | YPR084W       | YFL033C                 | RIM15         |
| YAL024C                                          | LTE1          | YDR378C                 | LSM6          |
| YKR057W                                          | RPS21A        | YGL163C                 | RAD54         |
| YGL178W                                          | MPT5          | YPL161C                 | BEM4          |
| YAL024C                                          | LTE1          | YBL025W                 | RRN10         |
| YNL293W                                          | MSB3          | YGR152C                 | RSR1          |
| YHR073W                                          | OSH3          | YGL016W                 | KAP122        |
| YEL043W                                          | YEL043W       | YER122C                 | GLO3          |
| YPL253C                                          | VIK1          | YHL002W                 | HSE1          |
| YPL057C                                          | SUR1          | YLR370C                 | ARC18         |
| YIL076W                                          | SEC28         | YGL223C                 | COG1          |
| YML013W                                          | UBX2          | YHR012W                 | VPS29         |
| YLR258W                                          | GSY2          | YPR119W                 | CLB2          |

| Predictions at threshold level 0.75 continued... |               |                         |               |
|--------------------------------------------------|---------------|-------------------------|---------------|
| Gene1 of predicted pair                          |               | Gene2 of predicted pair |               |
| Systematic Name                                  | Standard Name | Systematic Name         | Standard Name |
| YER044C                                          | ERG28         | YOL121C                 | RPS19A        |
| YDR202C                                          | RAV2          | YNR032W                 | PPG1          |
| YDR183W                                          | PLP1          | YGR188C                 | BUB1          |
| YGL033W                                          | HOP2          | YMR152W                 | YIM1          |
| YJL115W                                          | ASF1          | YHR056C                 | RSC30         |
| YKL116C                                          | PRR1          | YML071C                 | COG8          |
| YMR224C                                          | MRE11         | YMR133W                 | REC114        |
| YER044C                                          | ERG28         | YOR327C                 | SNC2          |
| YJL154C                                          | VPS35         | YER162C                 | RAD4          |
| YLR083C                                          | EMP70         | YDR310C                 | SUM1          |
| YMR127C                                          | SAS2          | YMR055C                 | BUB2          |
| YMR224C                                          | MRE11         | YIR005W                 | IST3          |
| YDR484W                                          | VPS52         | YGL198W                 | YIP4          |
| YBR036C                                          | CSG2          | YGR188C                 | BUB1          |
| YER044C                                          | ERG28         | YLR093C                 | NYV1          |
| YBL003C                                          | HTA2          | YOR141C                 | ARP8          |
| YOR043W                                          | WHI2          | YOR368W                 | RAD17         |
| YMR216C                                          | SKY1          | YAL002W                 | VPS8          |
| YDL184C                                          | RPL41A        | YGL025C                 | PGD1          |
| YIR002C                                          | MPH1          | YPL022W                 | RAD1          |
| YLR447C                                          | VMA6          | YCR086W                 | CSM1          |
| YHR161C                                          | YAP1801       | YLR206W                 | ENT2          |
| YDR183W                                          | PLP1          | YJR090C                 | GRR1          |
| YKL126W                                          | YPK1          | YBR019C                 | GAL10         |
| YMR026C                                          | PEX12         | YBR200W                 | BEM1          |
| YJL154C                                          | VPS35         | YDR144C                 | MKC7          |
| YLR381W                                          | CTF3          | YHR115C                 | DMA1          |
| YPR017C                                          | DSS4          | YMR216C                 | SKY1          |
| YFL023W                                          | BUD27         | YDL059C                 | RAD59         |

| Predictions at threshold level 0.75 continued... |               |                         |               |
|--------------------------------------------------|---------------|-------------------------|---------------|
| Gene1 of predicted pair                          |               | Gene2 of predicted pair |               |
| Systematic Name                                  | Standard Name | Systematic Name         | Standard Name |
| YHR039C-A                                        | VMA10         | YDL006W                 | PTC1          |
| YAL014C                                          | SYN8          | YAL030W                 | SNC1          |
| YMR152W                                          | YIM1          | YMR311C                 | GLC8          |
| YHR039C-A                                        | VMA10         | YJR033C                 | RAV1          |
| YNL236W                                          | SIN4          | YLR357W                 | RSC2          |
| YOR080W                                          | DIA2          | YBL079W                 | NUP170        |
| YLR109W                                          | AHP1          | YLR093C                 | NYV1          |
| YDL002C                                          | NHP10         | YDR378C                 | LSM6          |
| YLL007C                                          | YLL007C       | YMR127C                 | SAS2          |
| YKL101W                                          | HSL1          | YHR115C                 | DMA1          |
| YPR084W                                          | YPR084W       | YLR315W                 | NKP2          |
| YKL116C                                          | PRR1          | YOR327C                 | SNC2          |
| YHR178W                                          | STB5          | YJL190C                 | RPS22A        |
| YHR178W                                          | STB5          | YGR054W                 | YGR054W       |
| YDR443C                                          | SSN2          | YPR036W                 | VMA13         |
| YKR001C                                          | VPS1          | YPL045W                 | VPS16         |
| YHL031C                                          | GOS1          | YDL006W                 | PTC1          |
| YGL178W                                          | MPT5          | YPL086C                 | ELP3          |
| YPL057C                                          | SUR1          | YDR155C                 | CPR1          |
| YPR120C                                          | CLB5          | YDR200C                 | VPS64         |
| YPR051W                                          | MAK3          | YJR060W                 | CBF1          |
| YOR290C                                          | SNF2          | YOR038C                 | HIR2          |
| YDL184C                                          | RPL41A        | YJR084W                 | CSN12         |
| YHL020C                                          | OPI1          | YPL248C                 | GAL4          |
| YMR152W                                          | YIM1          | YLR398C                 | SKI2          |
| YBR173C                                          | UMP1          | YMR016C                 | SOK2          |
| YGL163C                                          | RAD54         | YLR254C                 | NDL1          |
| YMR172W                                          | HOT1          | YGR270W                 | YTA7          |
| YOR112W                                          | CEX1          | YHR012W                 | VPS29         |

| Predictions at threshold level 0.75 continued... |               |                         |               |
|--------------------------------------------------|---------------|-------------------------|---------------|
| Gene1 of predicted pair                          |               | Gene2 of predicted pair |               |
| Systematic Name                                  | Standard Name | Systematic Name         | Standard Name |
| YHR134W                                          | WSS1          | YEL053C                 | MAK10         |
| YPR084W                                          | YPR084W       | YJR033C                 | RAV1          |
| YGL200C                                          | EMP24         | YNL079C                 | TPM1          |
| YMR167W                                          | MLH1          | YOL090W                 | MSH2          |
| YGL115W                                          | SNF4          | YBR019C                 | GAL10         |
| YER116C                                          | SLX8          | YJR135C                 | MCM22         |
| YEL051W                                          | VMA8          | YJR033C                 | RAV1          |
| YOR191W                                          | RIS1          | YGR072W                 | UPF3          |
| YNL032W                                          | SIW14         | YLR371W                 | ROM2          |
| YJL127C                                          | SPT10         | YDR254W                 | CHL4          |
| YBR195C                                          | MSI1          | YCR086W                 | CSM1          |
| YDR358W                                          | GGA1          | YLR370C                 | ARC18         |
| YMR224C                                          | MRE11         | YPL037C                 | EGD1          |
| YGR020C                                          | VMA7          | YAL002W                 | VPS8          |
| YDR225W                                          | HTA1          | YOR195W                 | SLK19         |
| YDR293C                                          | SSD1          | YNR052C                 | POP2          |
| YBL051C                                          | PIN4          | YMR202W                 | ERG2          |
| YDL059C                                          | RAD59         | YPL256C                 | CLN2          |
| YEL053C                                          | MAK10         | YML071C                 | COG8          |
| YGR188C                                          | BUB1          | YHR115C                 | DMA1          |
| YPR036W                                          | VMA13         | YER162C                 | RAD4          |
| YJR056C                                          | YJR056C       | YLR180W                 | SAM1          |
| YLR447C                                          | VMA6          | YDR289C                 | RTT103        |
| YOR001W                                          | RRP6          | YJL124C                 | LSM1          |
| YNL238W                                          | KEX2          | YKR014C                 | YPT52         |
| YCR077C                                          | PAT1          | YER139C                 | YER139C       |
| YJR032W                                          | CPR7          | YBL025W                 | RRN10         |
| YCL045C                                          | YCL045C       | YML051W                 | GAL80         |
| YJL164C                                          | TPK1          | YDL047W                 | SIT4          |

| Predictions at threshold level 0.75 continued... |               |                         |               |
|--------------------------------------------------|---------------|-------------------------|---------------|
| Gene1 of predicted pair                          |               | Gene2 of predicted pair |               |
| Systematic Name                                  | Standard Name | Systematic Name         | Standard Name |
| YLR234W                                          | TOP3          | YJL006C                 | CTK2          |
| YKL117W                                          | SBA1          | YGL016W                 | KAP122        |
| YMR095C                                          | SNO1          | YOR290C                 | SNF2          |
| YMR198W                                          | CIK1          | YDL127W                 | PCL2          |
| YGL208W                                          | SIP2          | YJR090C                 | GRR1          |
| YPL253C                                          | VIK1          | YCR086W                 | CSM1          |
| YDR363W-A                                        | SEM1          | YKL048C                 | ELM1          |
| YAL024C                                          | LTE1          | YML097C                 | VPS9          |
| YPL018W                                          | CTF19         | YOR014W                 | RTS1          |
| YCR053W                                          | THR4          | YMR230W                 | RPS10B        |
| YGR249W                                          | MGA1          | YML001W                 | YPT7          |
| YAL024C                                          | LTE1          | YGL147C                 | RPL9A         |
| YMR198W                                          | CIK1          | YDL013W                 | SLX5          |
| YDR004W                                          | RAD57         | YPR119W                 | CLB2          |
| YGL025C                                          | PGD1          | YFR036W                 | CDC26         |
| YPR120C                                          | CLB5          | YGL151W                 | NUT1          |
| YOR212W                                          | STE4          | YPL112C                 | PEX25         |
| YDR363W-A                                        | SEM1          | YPL256C                 | CLN2          |
| YPL105C                                          | YPL105C       | YHR060W                 | VMA22         |
| YBR217W                                          | ATG12         | YKR099W                 | BAS1          |
| YNL087W                                          | TCB2          | YBR108W                 | YBR108W       |
| YMR004W                                          | MVP1          | YNL297C                 | MON2          |
| YLR234W                                          | TOP3          | YDL002C                 | NHP10         |
| YLR381W                                          | CTF3          | YMR055C                 | BUB2          |
| YDL020C                                          | RPN4          | YGL066W                 | SGF73         |
| YMR004W                                          | MVP1          | YDR202C                 | RAV2          |
| YGL033W                                          | HOP2          | YOR327C                 | SNC2          |
| YIL034C                                          | CAP2          | YNL293W                 | MSB3          |
| YMR202W                                          | ERG2          | YJR005W                 | APL1          |



| Predictions at threshold level 0.75 continued... |               |                         |               |
|--------------------------------------------------|---------------|-------------------------|---------------|
| Gene1 of predicted pair                          |               | Gene2 of predicted pair |               |
| Systematic Name                                  | Standard Name | Systematic Name         | Standard Name |
| YML038C                                          | YMD8          | YAL002W                 | VPS8          |
| YOR127W                                          | RGA1          | YEL056W                 | HAT2          |
| YGL135W                                          | RPL1B         | YJL095W                 | BCK1          |
| YGR040W                                          | KSS1          | YLR362W                 | STE11         |
| YGL087C                                          | MMS2          | YLR182W                 | SWI6          |
| YMR016C                                          | SOK2          | YMR133W                 | REC114        |
| YAR033W                                          | MST28         | YPL240C                 | HSP82         |
| YPL256C                                          | CLN2          | YML028W                 | TSA1          |
| YPL089C                                          | RLM1          | YKL161C                 | YKL161C       |
| YNL218W                                          | MGS1          | YDL020C                 | RPN4          |
| YER144C                                          | UBP5          | YDR261C                 | EXG2          |
| YNL291C                                          | MID1          | YEL043W                 | YEL043W       |
| YNL058C                                          | YNL058C       | YER162C                 | RAD4          |
| YNL041C                                          | COG6          | YOR327C                 | SNC2          |
| YKR030W                                          | GMH1          | YAL002W                 | VPS8          |
| YDR004W                                          | RAD57         | YDL155W                 | CLB3          |
| YDR448W                                          | ADA2          | YBR112C                 | CYC8          |
| YIL053W                                          | RHR2          | YHR156C                 | LIN1          |
| YPR084W                                          | YPR084W       | YDL006W                 | PTC1          |
| YOR337W                                          | TEA1          | YLR093C                 | NYV1          |
| YML097C                                          | VPS9          | YNL107W                 | YAF9          |
| YOR109W                                          | INP53         | YLR309C                 | IMH1          |
| YGR135W                                          | PRE9          | YDL047W                 | SIT4          |
| YPL096C-A                                        | ERI1          | YGL200C                 | EMP24         |
| YBR173C                                          | UMP1          | YBR200W                 | BEM1          |
| YBR215W                                          | HPC2          | YOR124C                 | UBP2          |
| YHR039C-A                                        | VMA10         | YJR084W                 | CSN12         |
| YLR192C                                          | HCR1          | YER162C                 | RAD4          |
| YGR135W                                          | PRE9          | YPR046W                 | MCM16         |

| Predictions at threshold level 0.75 continued... |               |                         |               |
|--------------------------------------------------|---------------|-------------------------|---------------|
| Gene1 of predicted pair                          |               | Gene2 of predicted pair |               |
| Systematic Name                                  | Standard Name | Systematic Name         | Standard Name |
| YNL044W                                          | YIP3          | YGL200C                 | EMP24         |
| YNL297C                                          | MON2          | YEL051W                 | VMA8          |
| YNL238W                                          | KEX2          | YMR054W                 | STV1          |
| YFL013C                                          | IES1          | YDL002C                 | NHP10         |
| YBL017C                                          | PEP1          | YDR484W                 | VPS52         |
| YGL253W                                          | HXK2          | YGR188C                 | BUB1          |
| YMR109W                                          | MYO5          | YNL107W                 | YAF9          |
| YAL024C                                          | LTE1          | YLR093C                 | NYV1          |
| YJL172W                                          | CPS1          | YBR280C                 | SAF1          |
| YGR252W                                          | GCN5          | YHR158C                 | KEL1          |
| YMR164C                                          | MSS11         | YBR083W                 | TEC1          |
| YLR360W                                          | VPS38         | YJL190C                 | RPS22A        |
| YNL243W                                          | SLA2          | YPL051W                 | ARL3          |
| YAL024C                                          | LTE1          | YDR146C                 | SWI5          |
| YDR097C                                          | MSH6          | YOL090W                 | MSH2          |
| YPL198W                                          | RPL7B         | YOR078W                 | BUD21         |
| YPR120C                                          | CLB5          | YML028W                 | TSA1          |
| YMR152W                                          | YIM1          | YLR180W                 | SAM1          |
| YIR003W                                          | YIR003W       | YCR088W                 | ABP1          |
| YLR192C                                          | HCR1          | YHR200W                 | RPN10         |
| YEL053C                                          | MAK10         | YPL234C                 | TFP3          |
| YDR129C                                          | SAC6          | YBR082C                 | UBC4          |
| YNL288W                                          | CAF40         | YPL018W                 | CTF19         |
| YIL007C                                          | NAS2          | YLR371W                 | ROM2          |
| YNL307C                                          | MCK1          | YDR318W                 | MCM21         |
| YER114C                                          | BOI2          | YML109W                 | ZDS2          |
| YLR079W                                          | SIC1          | YFR030W                 | MET10         |
| YBR131W                                          | CCZ1          | YOR106W                 | VAM3          |
| YBR057C                                          | MUM2          | YBL101C                 | ECM21         |

| Predictions at threshold level 0.75 continued... |               |                         |               |
|--------------------------------------------------|---------------|-------------------------|---------------|
| Gene1 of predicted pair                          |               | Gene2 of predicted pair |               |
| Systematic Name                                  | Standard Name | Systematic Name         | Standard Name |
| YPL256C                                          | CLN2          | YKL092C                 | BUD2          |
| YLR234W                                          | TOP3          | YML028W                 | TSA1          |
| YPL022W                                          | RAD1          | YDL059C                 | RAD59         |
| YML016C                                          | PPZ1          | YOL091W                 | SPO21         |
| YGL066W                                          | SGF73         | YFR036W                 | CDC26         |
| YJL170C                                          | ASG7          | YLR452C                 | SST2          |
| YNL032W                                          | SIW14         | YPR036W                 | VMA13         |
| YJL124C                                          | LSM1          | YGR270W                 | YTA7          |
| YGR209C                                          | TRX2          | YBR158W                 | AMN1          |
| YLR288C                                          | MEC3          | YPL022W                 | RAD1          |
| YML071C                                          | COG8          | YBL025W                 | RRN10         |
| YNL031C                                          | HHT2          | YKL068W                 | NUP100        |
| YPL178W                                          | CBC2          | YPL246C                 | RBD2          |
| YJL036W                                          | SNX4          | YER122C                 | GLO3          |
| YGR108W                                          | CLB1          | YGL253W                 | HXK2          |
| YKL139W                                          | CTK1          | YDR439W                 | LRS4          |
| YGR270W                                          | YTA7          | YJL190C                 | RPS22A        |
| YKL160W                                          | ELF1          | YNL238W                 | KEX2          |
| YJL172W                                          | CPS1          | YHR060W                 | VMA22         |
| YMR095C                                          | SNO1          | YOR270C                 | VPH1          |
| YIL156W                                          | UBP7          | YMR125W                 | STO1          |
| YPR120C                                          | CLB5          | YOR141C                 | ARP8          |
| YNL325C                                          | FIG4          | YLR180W                 | SAM1          |
| YOR109W                                          | INP53         | YER122C                 | GLO3          |
| YDR156W                                          | RPA14         | YIR005W                 | IST3          |
| YDR378C                                          | LSM6          | YLR350W                 | ORM2          |
| YDL020C                                          | RPN4          | YGR105W                 | VMA21         |
| YDR443C                                          | SSN2          | YLR386W                 | VAC14         |
| YDR103W                                          | STE5          | YJL187C                 | SWE1          |

| Predictions at threshold level 0.75 continued... |               |                         |               |
|--------------------------------------------------|---------------|-------------------------|---------------|
| Gene1 of predicted pair                          |               | Gene2 of predicted pair |               |
| Systematic Name                                  | Standard Name | Systematic Name         | Standard Name |
| YOR069W                                          | VPS5          | YDR153C                 | ENT5          |
| YNR052C                                          | POP2          | YLR410W                 | VIP1          |
| YPL137C                                          | GIP3          | YLR398C                 | SKI2          |
| YGL115W                                          | SNF4          | YNL127W                 | FAR11         |
| YDL006W                                          | PTC1          | YMR038C                 | CCS1          |
| YJR060W                                          | CBF1          | YML071C                 | COG8          |
| YGL212W                                          | VAM7          | YDL192W                 | ARF1          |
| YER120W                                          | SCS2          | YNL107W                 | YAF9          |
| YOR071C                                          | THI71         | YDR105C                 | TMS1          |
| YHL031C                                          | GOS1          | YKR020W                 | VPS51         |
| YML103C                                          | NUP188        | YPR120C                 | CLB5          |
| YDR108W                                          | GSG1          | YNL107W                 | YAF9          |
| YHR119W                                          | SET1          | YPL240C                 | HSP82         |
| YLR135W                                          | SLX4          | YDR207C                 | UME6          |
| YOR033C                                          | EXO1          | YCR086W                 | CSM1          |
| YLR170C                                          | APS1          | YOR327C                 | SNC2          |
| YBL103C                                          | RTG3          | YNL307C                 | MCK1          |
| YBR057C                                          | MUM2          | YDL155W                 | CLB3          |
| YNL036W                                          | NCE103        | YPL240C                 | HSP82         |
| YIL076W                                          | SEC28         | YHR039C-A               | VMA10         |
| YEL043W                                          | YEL043W       | YDR207C                 | UME6          |
| YJL127C                                          | SPT10         | YDL047W                 | SIT4          |
| YIL053W                                          | RHR2          | YNR072W                 | HXT17         |
| YPR017C                                          | DSS4          | YGL212W                 | VAM7          |
| YNL027W                                          | CRZ1          | YIL033C                 | BCY1          |
| YGL215W                                          | CLG1          | YGL200C                 | EMP24         |
| YDL232W                                          | OST4          | YOR085W                 | OST3          |
| YKL007W                                          | CAP1          | YOR367W                 | SCP1          |
| YLR079W                                          | SIC1          | YDR363W-A               | SEM1          |

| Predictions at threshold level 0.75 continued... |               |                         |               |
|--------------------------------------------------|---------------|-------------------------|---------------|
| Gene1 of predicted pair                          |               | Gene2 of predicted pair |               |
| Systematic Name                                  | Standard Name | Systematic Name         | Standard Name |
| YLR370C                                          | ARC18         | YLR398C                 | SKI2          |
| YBL047C                                          | EDE1          | YHR013C                 | ARD1          |
| YDL184C                                          | RPL41A        | YGL124C                 | MON1          |
| YPL234C                                          | TFP3          | YNL238W                 | KEX2          |
| YHR134W                                          | WSS1          | YEL056W                 | HAT2          |
| YJR063W                                          | RPA12         | YNL107W                 | YAF9          |
| YEL053C                                          | MAK10         | YLR452C                 | SST2          |
| YDR477W                                          | SNF1          | YOL111C                 | MDY2          |
| YPL256C                                          | CLN2          | YDR207C                 | UME6          |
| YEL053C                                          | MAK10         | YBR036C                 | CSG2          |
| YGR261C                                          | APL6          | YLR396C                 | VPS33         |
| YLR447C                                          | VMA6          | YDL077C                 | VAM6          |
| YKR020W                                          | VPS51         | YMR054W                 | STV1          |
| YDR184C                                          | ATC1          | YPR119W                 | CLB2          |
| YNL291C                                          | MID1          | YKR030W                 | GMH1          |
| YPL096C-A                                        | ERI1          | YPL050C                 | MNN9          |
| YOL111C                                          | MDY2          | YER162C                 | RAD4          |
| YPL045W                                          | VPS16         | YLR093C                 | NYV1          |
| YGL025C                                          | PGD1          | YGL151W                 | NUT1          |
| YNL297C                                          | MON2          | YGL003C                 | CDH1          |
| YNL106C                                          | INP52         | YDR254W                 | CHL4          |
| YML099C                                          | ARG81         | YJR094C                 | IME1          |
| YLR095C                                          | IOC2          | YBR036C                 | CSG2          |
| YAL020C                                          | ATS1          | YHR115C                 | DMA1          |
| YDR335W                                          | MSN5          | YDR440W                 | DOT1          |
| YLR178C                                          | TFS1          | YOL081W                 | IRA2          |
| YJL210W                                          | PEX2          | YNL214W                 | PEX17         |
| YER096W                                          | SHC1          | YDR289C                 | RTT103        |
| YFR036W                                          | CDC26         | YNL116W                 | DMA2          |

| Predictions at threshold level 0.75 continued... |               |                         |               |
|--------------------------------------------------|---------------|-------------------------|---------------|
| Gene1 of predicted pair                          |               | Gene2 of predicted pair |               |
| Systematic Name                                  | Standard Name | Systematic Name         | Standard Name |
| YGL087C                                          | MMS2          | YBR114W                 | RAD16         |
| YNL215W                                          | IES2          | YLR350W                 | ORM2          |
| YBL021C                                          | HAP3          | YBR114W                 | RAD16         |
| YOR112W                                          | CEX1          | YML038C                 | YMD8          |
| YGR072W                                          | UPF3          | YMR216C                 | SKY1          |
| YHR152W                                          | SPO12         | YPR119W                 | CLB2          |
| YOR195W                                          | SLK19         | YJR035W                 | RAD26         |
| YBL051C                                          | PIN4          | YHR111W                 | UBA4          |
| YLL007C                                          | YLL007C       | YIL034C                 | CAP2          |
| YDR484W                                          | VPS52         | YDR323C                 | PEP7          |
| YDR293C                                          | SSD1          | YLR381W                 | CTF3          |
| YOR337W                                          | TEA1          | YHR060W                 | VMA22         |
| YKL010C                                          | UFD4          | YPL213W                 | LEA1          |
| YLR320W                                          | MMS22         | YNL076W                 | MKS1          |
| YLR206W                                          | ENT2          | YBL106C                 | SRO77         |
| YOR337W                                          | TEA1          | YOR035C                 | SHE4          |
| YCR053W                                          | THR4          | YLR180W                 | SAM1          |
| YNL068C                                          | FKH2          | YBR084C-A               | RPL19A        |
| YDR254W                                          | CHL4          | YGL115W                 | SNF4          |
| YOL121C                                          | RPS19A        | YBR036C                 | CSG2          |
| YCR024C-A                                        | PMP1          | YGR059W                 | SPR3          |
| YOR106W                                          | VAM3          | YCL037C                 | SRO9          |
| YPL120W                                          | VPS30         | YNR032W                 | PPG1          |
| YDR363W-A                                        | SEM1          | YHR013C                 | ARD1          |
| YNL069C                                          | RPL16B        | YAL002W                 | VPS8          |
| YFR036W                                          | CDC26         | YDL192W                 | ARF1          |
| YIL076W                                          | SEC28         | YPR051W                 | MAK3          |
| YBR057C                                          | MUM2          | YAR014C                 | BUD14         |
| YDR254W                                          | CHL4          | YDR183W                 | PLP1          |

| Predictions at threshold level 0.75 continued... |               |                         |               |
|--------------------------------------------------|---------------|-------------------------|---------------|
| Gene1 of predicted pair                          |               | Gene2 of predicted pair |               |
| Systematic Name                                  | Standard Name | Systematic Name         | Standard Name |
| YDR202C                                          | RAV2          | YML071C                 | COG8          |
| YMR164C                                          | MSS11         | YKL117W                 | SBA1          |
| YLR386W                                          | VAC14         | YHR081W                 | LRP1          |
| YIL053W                                          | RHR2          | YGL003C                 | CDH1          |
| YJR060W                                          | CBF1          | YIR005W                 | IST3          |
| YLR452C                                          | SST2          | YDR358W                 | GGA1          |
| YLL039C                                          | UBI4          | YLR128W                 | DCN1          |
| YKL048C                                          | ELM1          | YKR048C                 | NAP1          |
| YGR249W                                          | MGA1          | YBR030W                 | YBR030W       |
| YER120W                                          | SCS2          | YDL006W                 | PTC1          |
| YJR084W                                          | CSN12         | YGL124C                 | MON1          |
| YBR215W                                          | HPC2          | YDR318W                 | MCM21         |
| YOL100W                                          | PKH2          | YPL004C                 | LSP1          |
| YFR031C-A                                        | RPL2A         | YMR016C                 | SOK2          |
| YNL236W                                          | SIN4          | YPL106C                 | SSE1          |
| YBL058W                                          | SHP1          | YBR173C                 | UMP1          |
| YDR004W                                          | RAD57         | YGL249W                 | ZIP2          |
| YJL124C                                          | LSM1          | YLR429W                 | CRN1          |
| YGL066W                                          | SGF73         | YBR010W                 | HHT1          |
| YBR215W                                          | HPC2          | YKL160W                 | ELF1          |
| YHR039C-A                                        | VMA10         | YCR053W                 | THR4          |
| YLR234W                                          | TOP3          | YGL151W                 | NUT1          |
| YNL145W                                          | MFA2          | YPL220W                 | RPL1A         |
| YNL307C                                          | MCK1          | YDR310C                 | SUM1          |
| YDR202C                                          | RAV2          | YDL185W                 | TFP1          |
| YJL058C                                          | BIT61         | YMR055C                 | BUB2          |
| YAL020C                                          | ATS1          | YMR202W                 | ERG2          |
| YJR040W                                          | GEF1          | YCR066W                 | RAD18         |
| YDR174W                                          | HMO1          | YOR195W                 | SLK19         |

| Predictions at threshold level 0.75 continued... |               |                         |               |
|--------------------------------------------------|---------------|-------------------------|---------------|
| Gene1 of predicted pair                          |               | Gene2 of predicted pair |               |
| Systematic Name                                  | Standard Name | Systematic Name         | Standard Name |
| YOR358W                                          | HAP5          | YFL047W                 | RGD2          |
| YER139C                                          | YER139C       | YJL095W                 | BCK1          |
| YKL213C                                          | DOA1          | YIR005W                 | IST3          |
| YFR010W                                          | UBP6          | YLR093C                 | NYV1          |
| YFR031C-A                                        | RPL2A         | YOR327C                 | SNC2          |
| YNL297C                                          | MON2          | YGL115W                 | SNF4          |
| YNL288W                                          | CAF40         | YPL203W                 | TPK2          |
| YMR116C                                          | ASC1          | YNL016W                 | PUB1          |
| YOL030W                                          | GAS5          | YLR410W                 | VIP1          |
| YBL051C                                          | PIN4          | YNL289W                 | PCL1          |
| YDR443C                                          | SSN2          | YKL116C                 | PRR1          |
| YOL136C                                          | PFK27         | YBR158W                 | AMN1          |
| YLR240W                                          | VPS34         | YOL018C                 | TLG2          |
| YDR174W                                          | HMO1          | YLR381W                 | CTF3          |
| YOR109W                                          | INP53         | YDR153C                 | ENT5          |
| YHR178W                                          | STB5          | YHL002W                 | HSE1          |
| YPL037C                                          | EGD1          | YOL018C                 | TLG2          |
| YLR119W                                          | SRN2          | YNL076W                 | MKS1          |
| YHR200W                                          | RPN10         | YBR280C                 | SAF1          |
| YDR448W                                          | ADA2          | YGR252W                 | GCN5          |
| YNL199C                                          | GCR2          | YHR167W                 | THP2          |
| YDR293C                                          | SSD1          | YCL037C                 | SRO9          |
| YPR120C                                          | CLB5          | YAR014C                 | BUD14         |
| YLR381W                                          | CTF3          | YGL163C                 | RAD54         |
| YGR184C                                          | UBR1          | YPL018W                 | CTF19         |
| YJL176C                                          | SWI3          | YGR135W                 | PRE9          |
| YDR443C                                          | SSN2          | YMR095C                 | SNO1          |
| YML058W                                          | SML1          | YML095C                 | RAD10         |
| YJR135C                                          | MCM22         | YFR036W                 | CDC26         |



| Predictions at threshold level 0.75 continued... |               |                         |               |
|--------------------------------------------------|---------------|-------------------------|---------------|
| Gene1 of predicted pair                          |               | Gene2 of predicted pair |               |
| Systematic Name                                  | Standard Name | Systematic Name         | Standard Name |
| YFR030W                                          | MET10         | YJL129C                 | TRK1          |
| YJR135C                                          | MCM22         | YDR200C                 | VPS64         |
| YJL036W                                          | SNX4          | YCL037C                 | SRO9          |
| YNL297C                                          | MON2          | YGL054C                 | ERV14         |
| YKL139W                                          | CTK1          | YER144C                 | UBP5          |
| YBR200W                                          | BEM1          | YLR315W                 | NKP2          |
| YHR156C                                          | LIN1          | YCR053W                 | THR4          |
| YPL158C                                          | YPL158C       | YHR108W                 | GGA2          |
| YDR484W                                          | VPS52         | YLR441C                 | RPS1A         |
| YDR244W                                          | PEX5          | YPL112C                 | PEX25         |
| YMR095C                                          | SNO1          | YDL184C                 | RPL41A        |
| YDR385W                                          | EFT2          | YKL041W                 | VPS24         |
| YDR156W                                          | RPA14         | YIL036W                 | CST6          |
| YLR337C                                          | VRP1          | YBL072C                 | RPS8A         |
| YGR108W                                          | CLB1          | YHR134W                 | WSS1          |
| YIL156W                                          | UBP7          | YER110C                 | KAP123        |
| YLR360W                                          | VPS38         | YPL120W                 | VPS30         |
| YOL121C                                          | RPS19A        | YEL060C                 | PRB1          |
| YOR023C                                          | AHC1          | YML095C                 | RAD10         |
| YMR116C                                          | ASC1          | YMR089C                 | YTA12         |
| YGR104C                                          | SRB5          | YHR167W                 | THP2          |
| YDR171W                                          | HSP42         | YLR370C                 | ARC18         |
| YGL133W                                          | ITC1          | YML095C                 | RAD10         |
| YNL215W                                          | IES2          | YJR060W                 | CBF1          |
| YFR031C-A                                        | RPL2A         | YBR200W                 | BEM1          |
| YKL126W                                          | YPK1          | YHR060W                 | VMA22         |
| YDR129C                                          | SAC6          | YMR231W                 | PEP5          |
| YKL032C                                          | IXR1          | YDR363W-A               | SEM1          |
| YHR086W                                          | NAM8          | YKL074C                 | MUD2          |

| Predictions at threshold level 0.75 continued... |               |                         |               |
|--------------------------------------------------|---------------|-------------------------|---------------|
| Gene1 of predicted pair                          |               | Gene2 of predicted pair |               |
| Systematic Name                                  | Standard Name | Systematic Name         | Standard Name |
| YCR034W                                          | FEN1          | YJR032W                 | CPR7          |
| YPR120C                                          | CLB5          | YPR119W                 | CLB2          |
| YBR215W                                          | HPC2          | YJR035W                 | RAD26         |
| YKR057W                                          | RPS21A        | YML095C                 | RAD10         |
| YBL021C                                          | HAP3          | YPL018W                 | CTF19         |
| YEL053C                                          | MAK10         | YHR081W                 | LRP1          |
| YPL037C                                          | EGD1          | YER120W                 | SCS2          |
| YDR469W                                          | SDC1          | YEL056W                 | HAT2          |
| YBR173C                                          | UMP1          | YOR270C                 | VPH1          |
| YBR107C                                          | IML3          | YDR318W                 | MCM21         |
| YPL161C                                          | BEM4          | YNL079C                 | TPM1          |
| YJR035W                                          | RAD26         | YGL031C                 | RPL24A        |
| YJR140C                                          | HIR3          | YGL250W                 | RMR1          |
| YKL038W                                          | RGT1          | YBR112C                 | CYC8          |
| YBR126C                                          | TPS1          | YGR249W                 | MGA1          |
| YMR055C                                          | BUB2          | YMR038C                 | CCS1          |
| YGL033W                                          | HOP2          | YNL307C                 | MCK1          |
| YHR012W                                          | VPS29         | YOL108C                 | INO4          |
| YJR056C                                          | YJR056C       | YBR280C                 | SAF1          |
| YKL126W                                          | YPK1          | YLR425W                 | TUS1          |
| YML095C                                          | RAD10         | YDR254W                 | CHL4          |
| YPL037C                                          | EGD1          | YCR053W                 | THR4          |
| YKL214C                                          | YRA2          | YHR167W                 | THP2          |
| YMR054W                                          | STV1          | YJR033C                 | RAV1          |
| YKL126W                                          | YPK1          | YNL041C                 | COG6          |
| YLR090W                                          | XDJ1          | YDL184C                 | RPL41A        |
| YGR261C                                          | APL6          | YEL051W                 | VMA8          |
| YOR337W                                          | TEA1          | YOR043W                 | WHI2          |
| YMR224C                                          | MRE11         | YOR308C                 | SNU66         |

| Predictions at threshold level 0.75 continued... |               |                         |               |
|--------------------------------------------------|---------------|-------------------------|---------------|
| Gene1 of predicted pair                          |               | Gene2 of predicted pair |               |
| Systematic Name                                  | Standard Name | Systematic Name         | Standard Name |
| YDL116W                                          | NUP84         | YEL050C                 | RML2          |
| YBL047C                                          | EDE1          | YJL095W                 | BCK1          |
| YIL033C                                          | BCY1          | YPL018W                 | CTF19         |
| YFL013C                                          | IES1          | YJR140C                 | HIR3          |
| YGR249W                                          | MGA1          | YOR043W                 | WHI2          |
| YNL206C                                          | RTT106        | YOR038C                 | HIR2          |
| YMR055C                                          | BUB2          | YJR035W                 | RAD26         |
| YDR293C                                          | SSD1          | YPL256C                 | CLN2          |
| YBL101C                                          | ECM21         | YHL002W                 | HSE1          |
| YLR119W                                          | SRN2          | YER122C                 | GLO3          |
| YGR072W                                          | UPF3          | YER122C                 | GLO3          |
| YNL291C                                          | MID1          | YML071C                 | COG8          |
| YDR156W                                          | RPA14         | YBL101C                 | ECM21         |
| YNL041C                                          | COG6          | YDR469W                 | SDC1          |
| YDR389W                                          | SAC7          | YOR035C                 | SHE4          |
| YML016C                                          | PPZ1          | YNL107W                 | YAF9          |
| YNL058C                                          | YNL058C       | YEL060C                 | PRB1          |
| YHR013C                                          | ARD1          | YKL101W                 | HSL1          |
| YFL033C                                          | RIM15         | YGL054C                 | ERV14         |
| YLR292C                                          | SEC72         | YPL161C                 | BEM4          |
| YOR043W                                          | WHI2          | YER161C                 | SPT2          |
| YER144C                                          | UBP5          | YBR171W                 | SEC66         |
| YML117W                                          | NAB6          | YHR200W                 | RPN10         |
| YLR083C                                          | EMP70         | YNL291C                 | MID1          |
| YDR004W                                          | RAD57         | YML095C                 | RAD10         |
| YMR167W                                          | MLH1          | YOR368W                 | RAD17         |
| YPL115C                                          | BEM3          | YDR183W                 | PLP1          |
| YGR054W                                          | YGR054W       | YHR114W                 | BZZ1          |
| YGL135W                                          | RPL1B         | YDR358W                 | GGA1          |

| Predictions at threshold level 0.75 continued... |               |                         |               |
|--------------------------------------------------|---------------|-------------------------|---------------|
| Gene1 of predicted pair                          |               | Gene2 of predicted pair |               |
| Systematic Name                                  | Standard Name | Systematic Name         | Standard Name |
| YBR108W                                          | YBR108W       | YEL053C                 | MAK10         |
| YGL147C                                          | RPL9A         | YER162C                 | RAD4          |
| YBL027W                                          | RPL19B        | YGR188C                 | BUB1          |
| YLR288C                                          | MEC3          | YMR198W                 | CIK1          |
| YPR131C                                          | NAT3          | YMR202W                 | ERG2          |
| YOR106W                                          | VAM3          | YJR033C                 | RAV1          |
| YOR145C                                          | PNO1          | YOR001W                 | RRP6          |
| YKR035W-A                                        | DID2          | YNL076W                 | MKS1          |
| YGR078C                                          | PAC10         | YEL022W                 | GEA2          |
| YBR126C                                          | TPS1          | YBR280C                 | SAF1          |
| YHR111W                                          | UBA4          | YKR048C                 | NAP1          |
| YHL027W                                          | RIM101        | YER122C                 | GLO3          |
| YDR174W                                          | HMO1          | YGL163C                 | RAD54         |
| YJR056C                                          | YJR056C       | YHR081W                 | LRP1          |
| YBL051C                                          | PIN4          | YLR381W                 | CTF3          |
| YCR020C-A                                        | MAK31         | YCL037C                 | SRO9          |
| YLR360W                                          | VPS38         | YAR014C                 | BUD14         |
| YOR327C                                          | SNC2          | YNR049C                 | MSO1          |
| YDR335W                                          | MSN5          | YGL003C                 | CDH1          |
| YHR158C                                          | KEL1          | YOL081W                 | IRA2          |
| YGL025C                                          | PGD1          | YNL236W                 | SIN4          |
| YDR202C                                          | RAV2          | YML001W                 | YPT7          |
| YCR088W                                          | ABP1          | YOR035C                 | SHE4          |
| YML115C                                          | VAN1          | YOR140W                 | SFL1          |
| YLR447C                                          | VMA6          | YHL002W                 | HSE1          |
| YDL065C                                          | PEX19         | YOR193W                 | PEX27         |
| YIL002C                                          | INP51         | YDR080W                 | VPS41         |
| YGR184C                                          | UBR1          | YDR254W                 | CHL4          |
| YNL041C                                          | COG6          | YKL119C                 | VPH2          |

| Predictions at threshold level 0.75 continued... |               |                         |               |
|--------------------------------------------------|---------------|-------------------------|---------------|
| Gene1 of predicted pair                          |               | Gene2 of predicted pair |               |
| Systematic Name                                  | Standard Name | Systematic Name         | Standard Name |
| YKL126W                                          | YPK1          | YDL192W                 | ARF1          |
| YDR448W                                          | ADA2          | YNL031C                 | HHT2          |
| YBL102W                                          | SFT2          | YNL107W                 | YAF9          |
| YLR102C                                          | APC9          | YKL048C                 | ELM1          |
| YPL161C                                          | BEM4          | YEL060C                 | PRB1          |
| YPL022W                                          | RAD1          | YPL018W                 | CTF19         |
| YLR234W                                          | TOP3          | YOR080W                 | DIA2          |
| YNL215W                                          | IES2          | YNL225C                 | CNM67         |
| YDL005C                                          | MED2          | YJL140W                 | RPB4          |
| YOR039W                                          | CKB2          | YOR368W                 | RAD17         |
| YKR072C                                          | SIS2          | YDL013W                 | SLX5          |
| YAL024C                                          | LTE1          | YML112W                 | CTK3          |
| YOR132W                                          | VPS17         | YJL204C                 | RCY1          |
| YMR133W                                          | REC114        | YDR310C                 | SUM1          |
| YKL025C                                          | PAN3          | YPR051W                 | MAK3          |
| YBR217W                                          | ATG12         | YLR094C                 | GIS3          |
| YMR152W                                          | YIM1          | YJL095W                 | BCK1          |
| YOR243C                                          | PUS7          | YHR167W                 | THP2          |
| YML099C                                          | ARG81         | YMR042W                 | ARG80         |
| YDR245W                                          | MNN10         | YHL002W                 | HSE1          |
| YKL048C                                          | ELM1          | YOR066W                 | MSA1          |
| YLR093C                                          | NYV1          | YEL013W                 | VAC8          |
| YNL215W                                          | IES2          | YGL148W                 | ARO2          |
| YJL124C                                          | LSM1          | YOL091W                 | SPO21         |
| YMR127C                                          | SAS2          | YHR114W                 | BZZ1          |
| YJR140C                                          | HIR3          | YDR289C                 | RTT103        |
| YIL159W                                          | BNR1          | YNL087W                 | TCB2          |
| YOR290C                                          | SNF2          | YER068W                 | MOT2          |
| YDR245W                                          | MNN10         | YOR043W                 | WHI2          |

| Predictions at threshold level 0.75 continued... |               |                         |               |
|--------------------------------------------------|---------------|-------------------------|---------------|
| Gene1 of predicted pair                          |               | Gene2 of predicted pair |               |
| Systematic Name                                  | Standard Name | Systematic Name         | Standard Name |
| YJL036W                                          | SNX4          | YER162C                 | RAD4          |
| YLR058C                                          | SHM2          | YDR318W                 | MCM21         |
| YHR200W                                          | RPN10         | YGL003C                 | CDH1          |
| YKR020W                                          | VPS51         | YML071C                 | COG8          |
| YOR039W                                          | CKB2          | YPR119W                 | CLB2          |
| YDR439W                                          | LRS4          | YDR254W                 | CHL4          |
| YEL065W                                          | SIT1          | YJL140W                 | RPB4          |
| YOL111C                                          | MDY2          | YLR371W                 | ROM2          |
| YAL024C                                          | LTE1          | YML071C                 | COG8          |
| YDL020C                                          | RPN4          | YBR057C                 | MUM2          |
| YNL106C                                          | INP52         | YLR381W                 | CTF3          |
| YHL020C                                          | OPI1          | YAL002W                 | VPS8          |
| YDR383C                                          | NKP1          | YDR378C                 | LSM6          |
| YNL248C                                          | RPA49         | YAR014C                 | BUD14         |
| YMR179W                                          | SPT21         | YDL013W                 | SLX5          |
| YCR066W                                          | RAD18         | YDL047W                 | SIT4          |
| YLR095C                                          | IOC2          | YML001W                 | YPT7          |
| YGL054C                                          | ERV14         | YKR039W                 | GAP1          |
| YLR170C                                          | APS1          | YPL259C                 | APM1          |
| YOR368W                                          | RAD17         | YMR038C                 | CCS1          |
| YBL021C                                          | HAP3          | YDR318W                 | MCM21         |
| YOR337W                                          | TEA1          | YBR030W                 | YBR030W       |
| YLR410W                                          | VIP1          | YOR141C                 | ARP8          |
| YDR009W                                          | GAL3          | YML051W                 | GAL80         |
| YOR106W                                          | VAM3          | YGL115W                 | SNF4          |
| YKR001C                                          | VPS1          | YKL041W                 | VPS24         |
| YPL024W                                          | RMI1          | YGL124C                 | MON1          |
| YDR289C                                          | RTT103        | YOL054W                 | PSH1          |
| YOR337W                                          | TEA1          | YBR173C                 | UMP1          |

| Predictions at threshold level 0.75 continued... |               |                         |               |
|--------------------------------------------------|---------------|-------------------------|---------------|
| Gene1 of predicted pair                          |               | Gene2 of predicted pair |               |
| Systematic Name                                  | Standard Name | Systematic Name         | Standard Name |
| YDR378C                                          | LSM6          | YPL220W                 | RPL1A         |
| YGR261C                                          | APL6          | YDR207C                 | UME6          |
| YEL053C                                          | MAK10         | YMR230W                 | RPS10B        |
| YGL003C                                          | CDH1          | YOR368W                 | RAD17         |
| YOR066W                                          | MSA1          | YHR081W                 | LRP1          |
| YPR036W                                          | VMA13         | YJR032W                 | CPR7          |
| YMR202W                                          | ERG2          | YML095C                 | RAD10         |
| YPL246C                                          | RBD2          | YGR059W                 | SPR3          |
| YJR060W                                          | CBF1          | YER120W                 | SCS2          |
| YOR212W                                          | STE4          | YBL016W                 | FUS3          |
| YCR020C-A                                        | MAK31         | YOR127W                 | RGA1          |
| YBR171W                                          | SEC66         | YJR032W                 | CPR7          |
| YFL023W                                          | BUD27         | YDL223C                 | HBT1          |
| YML071C                                          | COG8          | YMR311C                 | GLC8          |
| YDL149W                                          | ATG9          | YLR431C                 | ATG23         |
| YGL212W                                          | VAM7          | YDL083C                 | RPS16B        |
| YPL120W                                          | VPS30         | YNL127W                 | FAR11         |
| YFR008W                                          | FAR7          | YMR052W                 | FAR3          |
| YPL195W                                          | APL5          | YGL124C                 | MON1          |
| YKL048C                                          | ELM1          | YER044C                 | ERG28         |
| YGL253W                                          | HXK2          | YJL190C                 | RPS22A        |
| YMR199W                                          | CLN1          | YLR425W                 | TUS1          |
| YOR106W                                          | VAM3          | YPL120W                 | VPS30         |
| YOR083W                                          | WHI5          | YPR046W                 | MCM16         |
| YIL034C                                          | CAP2          | YJR032W                 | CPR7          |
| YDL020C                                          | RPN4          | YDL155W                 | CLB3          |
| YER110C                                          | KAP123        | YGL253W                 | HXK2          |
| YIL076W                                          | SEC28         | YFR036W                 | CDC26         |
| YBR057C                                          | MUM2          | YDR318W                 | MCM21         |

| Predictions at threshold level 0.75 continued... |               |                         |               |
|--------------------------------------------------|---------------|-------------------------|---------------|
| Gene1 of predicted pair                          |               | Gene2 of predicted pair |               |
| Systematic Name                                  | Standard Name | Systematic Name         | Standard Name |
| YML071C                                          | COG8          | YOL081W                 | IRA2          |
| YBL102W                                          | SFT2          | YJL004C                 | SYS1          |
| YFR010W                                          | UBP6          | YJR084W                 | CSN12         |
| YOR033C                                          | EXO1          | YMR038C                 | CCS1          |
| YDR320C                                          | SWA2          | YEL022W                 | GEA2          |
| YGL147C                                          | RPL9A         | YNL307C                 | MCK1          |
| YDR200C                                          | VPS64         | YOL091W                 | SPO21         |
| YLR370C                                          | ARC18         | YMR230W                 | RPS10B        |
| YDR378C                                          | LSM6          | YDR440W                 | DOT1          |
| YBL079W                                          | NUP170        | YGL031C                 | RPL24A        |
| YMR095C                                          | SNO1          | YKR035W-A               | DID2          |
| YNL248C                                          | RPA49         | YIR005W                 | IST3          |
| YKL010C                                          | UFD4          | YDL155W                 | CLB3          |
| YEL053C                                          | MAK10         | YDR183W                 | PLP1          |
| YPL161C                                          | BEM4          | YMR230W                 | RPS10B        |
| YOR275C                                          | RIM20         | YNL229C                 | URE2          |
| YOR180C                                          | DCI1          | YLR284C                 | ECI1          |
| YDR261C                                          | EXG2          | YLR371W                 | ROM2          |
| YCR063W                                          | BUD31         | YIR009W                 | MSL1          |
| YDR309C                                          | GIC2          | YDR310C                 | SUM1          |
| YBR290W                                          | BSD2          | YMR164C                 | MSS11         |
| YJL172W                                          | CPS1          | YNL076W                 | MKS1          |
| YNL058C                                          | YNL058C       | YOL121C                 | RPS19A        |
| YGL087C                                          | MMS2          | YMR127C                 | SAS2          |
| YGL147C                                          | RPL9A         | YPL057C                 | SUR1          |
| YMR205C                                          | PFK2          | YJL183W                 | MNN11         |
| YLR386W                                          | VAC14         | YOR141C                 | ARP8          |
| YBL103C                                          | RTG3          | YPL057C                 | SUR1          |
| YNL069C                                          | RPL16B        | YGL054C                 | ERV14         |



| Predictions at threshold level 0.75 continued... |               |                         |               |
|--------------------------------------------------|---------------|-------------------------|---------------|
| Gene1 of predicted pair                          |               | Gene2 of predicted pair |               |
| Systematic Name                                  | Standard Name | Systematic Name         | Standard Name |
| YEL065W                                          | SIT1          | YMR311C                 | GLC8          |
| YKL025C                                          | PAN3          | YBL051C                 | PIN4          |
| YGR104C                                          | SRB5          | YJL095W                 | BCK1          |
| YDL155W                                          | CLB3          | YBL072C                 | RPS8A         |
| YHL031C                                          | GOS1          | YHR167W                 | THP2          |
| YOR358W                                          | HAP5          | YPL248C                 | GAL4          |
| YFL033C                                          | RIM15         | YEL053C                 | MAK10         |
| YNL243W                                          | SLA2          | YDL192W                 | ARF1          |
| YLR315W                                          | NKP2          | YML112W                 | CTK3          |
| YHL020C                                          | OPI1          | YNL041C                 | COG6          |
| YNR052C                                          | POP2          | YBR200W                 | BEM1          |
| YMR116C                                          | ASC1          | YER001W                 | MNN1          |
| YAL014C                                          | SYN8          | YEL013W                 | VAC8          |
| YDL020C                                          | RPN4          | YBR082C                 | UBC4          |
| YKL032C                                          | IXR1          | YKR020W                 | VPS51         |
| YPL022W                                          | RAD1          | YBR274W                 | CHK1          |
| YJR140C                                          | HIR3          | YDR146C                 | SWI5          |
| YAR014C                                          | BUD14         | YGL252C                 | RTG2          |
| YLR410W                                          | VIP1          | YJR060W                 | CBF1          |
| YDR318W                                          | MCM21         | YOR014W                 | RTS1          |
| YPR030W                                          | CSR2          | YGL003C                 | CDH1          |
| YPL049C                                          | DIG1          | YDR480W                 | DIG2          |
| YCL001W                                          | RER1          | YML038C                 | YMD8          |
| YBR041W                                          | FAT1          | YHR200W                 | RPN10         |
| YDR264C                                          | AKR1          | YPL256C                 | CLN2          |
| YAL024C                                          | LTE1          | YDR183W                 | PLP1          |
| YDL223C                                          | HBT1          | YKL041W                 | VPS24         |
| YDL116W                                          | NUP84         | YIL148W                 | RPL40A        |
| YCR088W                                          | ABP1          | YMR109W                 | MYO5          |

| Predictions at threshold level 0.75 continued... |               |                         |               |
|--------------------------------------------------|---------------|-------------------------|---------------|
| Gene1 of predicted pair                          |               | Gene2 of predicted pair |               |
| Systematic Name                                  | Standard Name | Systematic Name         | Standard Name |
| YHR039C-A                                        | VMA10         | YMR214W                 | SCJ1          |
| YBL058W                                          | SHP1          | YFL023W                 | BUD27         |
| YGR184C                                          | UBR1          | YMR038C                 | CCS1          |
| YDR320C                                          | SWA2          | YDL006W                 | PTC1          |
| YBR217W                                          | ATG12         | YHR039C-A               | VMA10         |
| YBR217W                                          | ATG12         | YNL032W                 | SIW14         |
| YKL048C                                          | ELM1          | YLR371W                 | ROM2          |
| YDR004W                                          | RAD57         | YBR278W                 | DPB3          |
| YDR439W                                          | LRS4          | YML112W                 | CTK3          |
| YOR127W                                          | RGA1          | YNL051W                 | COG5          |
| YDR320C                                          | SWA2          | YOR327C                 | SNC2          |
| YBR065C                                          | ECM2          | YDR163W                 | CWC15         |
| YPR017C                                          | DSS4          | YIL076W                 | SEC28         |
| YHR200W                                          | RPN10         | YBL087C                 | RPL23A        |
| YLL039C                                          | UBI4          | YMR089C                 | YTA12         |
| YBR279W                                          | PAF1          | YBR089C-A               | NHP6B         |
| YLR292C                                          | SEC72         | YCR086W                 | CSM1          |
| YJL210W                                          | PEX2          | YMR026C                 | PEX12         |
| YKR072C                                          | SIS2          | YBR274W                 | CHK1          |
| YPL050C                                          | MNN9          | YJL095W                 | BCK1          |
| YDR176W                                          | NGG1          | YNL031C                 | HHT2          |
| YLR292C                                          | SEC72         | YGR054W                 | YGR054W       |
| YLR240W                                          | VPS34         | YOR036W                 | PEP12         |
| YGL163C                                          | RAD54         | YDR310C                 | SUM1          |
| YNL218W                                          | MGS1          | YOR080W                 | DIA2          |
| YFL033C                                          | RIM15         | YOL108C                 | INO4          |
| YMR142C                                          | RPL13B        | YLR370C                 | ARC18         |
| YHR156C                                          | LIN1          | YER139C                 | YER139C       |
| YOR140W                                          | SFL1          | YHR012W                 | VPS29         |

| Predictions at threshold level 0.75 continued... |               |                         |               |
|--------------------------------------------------|---------------|-------------------------|---------------|
| Gene1 of predicted pair                          |               | Gene2 of predicted pair |               |
| Systematic Name                                  | Standard Name | Systematic Name         | Standard Name |
| YPR017C                                          | DSS4          | YOR069W                 | VPS5          |
| YGL078C                                          | DBP3          | YCR053W                 | THR4          |
| YER116C                                          | SLX8          | YBR200W                 | BEM1          |
| YGR249W                                          | MGA1          | YPL037C                 | EGD1          |
| YER110C                                          | KAP123        | YLR447C                 | VMA6          |
| YER139C                                          | YER139C       | YOR124C                 | UBP2          |
| YHR086W                                          | NAM8          | YNL206C                 | RTT106        |
| YBR171W                                          | SEC66         | YGL124C                 | MON1          |
| YML109W                                          | ZDS2          | YDR227W                 | SIR4          |
| YLR095C                                          | IOC2          | YPL057C                 | SUR1          |
| YKR061W                                          | KTR2          | YDR254W                 | CHL4          |
| YIL053W                                          | RHR2          | YKR099W                 | BAS1          |
| YML102W                                          | CAC2          | YGL175C                 | SAE2          |
| YER120W                                          | SCS2          | YAR014C                 | BUD14         |
| YKR035W-A                                        | DID2          | YPR046W                 | MCM16         |
| YJL095W                                          | BCK1          | YBR280C                 | SAF1          |
| YHR178W                                          | STB5          | YJL095W                 | BCK1          |
| YMR004W                                          | MVP1          | YMR216C                 | SKY1          |
| YBR108W                                          | YBR108W       | YOR035C                 | SHE4          |
| YKL139W                                          | CTK1          | YFL023W                 | BUD27         |
| YCR053W                                          | THR4          | YHL011C                 | PRS3          |
| YBR019C                                          | GAL10         | YMR230W                 | RPS10B        |
| YIR005W                                          | IST3          | YDR183W                 | PLP1          |
| YHR124W                                          | NDT80         | YJR094C                 | IME1          |
| YDR245W                                          | MNN10         | YOL081W                 | IRA2          |
| YDR192C                                          | NUP42         | YGL100W                 | SEH1          |
| YOR290C                                          | SNF2          | YJL183W                 | MNN11         |
| YNR072W                                          | HXT17         | YLR452C                 | SST2          |
| YFR031C-A                                        | RPL2A         | YLR119W                 | SRN2          |

| Predictions at threshold level 0.75 continued... |               |                         |               |
|--------------------------------------------------|---------------|-------------------------|---------------|
| Gene1 of predicted pair                          |               | Gene2 of predicted pair |               |
| Systematic Name                                  | Standard Name | Systematic Name         | Standard Name |
| YMR172W                                          | HOT1          | YDR310C                 | SUM1          |
| YGL190C                                          | CDC55         | YKL057C                 | NUP120        |
| YHR108W                                          | GGA2          | YER122C                 | GLO3          |
| YLR360W                                          | VPS38         | YBL047C                 | EDE1          |
| YBL008W                                          | HIR1          | YLR429W                 | CRN1          |
| YDL116W                                          | NUP84         | YGR081C                 | SLX9          |
| YPR084W                                          | YPR084W       | YDR108W                 | GSG1          |
| YMR142C                                          | RPL13B        | YBR019C                 | GAL10         |
| YGL078C                                          | DBP3          | YHR052W                 | CIC1          |
| YHR156C                                          | LIN1          | YBR036C                 | CSG2          |
| YLR381W                                          | CTF3          | YJL190C                 | RPS22A        |
| YHR098C                                          | SFB3          | YGL223C                 | COG1          |
| YHR161C                                          | YAP1801       | YIL033C                 | BCY1          |
| YPL022W                                          | RAD1          | YMR038C                 | CCS1          |
| YKR001C                                          | VPS1          | YJL183W                 | MNN11         |
| YNL215W                                          | IES2          | YJR063W                 | RPA12         |
| YKR101W                                          | SIR1          | YML102W                 | CAC2          |
| YEL065W                                          | SIT1          | YMR026C                 | PEX12         |
| YIL008W                                          | URM1          | YDL155W                 | CLB3          |
| YLL007C                                          | YLL007C       | YOR127W                 | RGA1          |
| YML013W                                          | UBX2          | YJR084W                 | CSN12         |
| YIL156W                                          | UBP7          | YPL256C                 | CLN2          |
| YKL048C                                          | ELM1          | YBL025W                 | RRN10         |
| YJR058C                                          | APS2          | YDL192W                 | ARF1          |
| YPL024W                                          | RMI1          | YKL116C                 | PRR1          |
| YBR057C                                          | MUM2          | YBL025W                 | RRN10         |
| YDR477W                                          | SNF1          | YOL121C                 | RPS19A        |
| YDR004W                                          | RAD57         | YDR310C                 | SUM1          |
| YCR065W                                          | HCM1          | YCR077C                 | PAT1          |

| Predictions at threshold level 0.75 continued... |               |                         |               |
|--------------------------------------------------|---------------|-------------------------|---------------|
| Gene1 of predicted pair                          |               | Gene2 of predicted pair |               |
| Systematic Name                                  | Standard Name | Systematic Name         | Standard Name |
| YHR156C                                          | LIN1          | YDL184C                 | RPL41A        |
| YIL033C                                          | BCY1          | YGR188C                 | BUB1          |
| YDL006W                                          | PTC1          | YGR135W                 | PRE9          |
| YGR241C                                          | YAP1802       | YLR360W                 | VPS38         |
| YDR383C                                          | NKP1          | YKR061W                 | KTR2          |
| YPR036W                                          | VMA13         | YDR207C                 | UME6          |
| YML095C                                          | RAD10         | YHR111W                 | UBA4          |
| YPR084W                                          | YPR084W       | YNL199C                 | GCR2          |
| YIL036W                                          | CST6          | YOL081W                 | IRA2          |
| YDL184C                                          | RPL41A        | YPL037C                 | EGD1          |
| YML115C                                          | VAN1          | YBL067C                 | UBP13         |
| YOR106W                                          | VAM3          | YEL036C                 | ANP1          |
| YCR002C                                          | CDC10         | YCL024W                 | KCC4          |
| YOR127W                                          | RGA1          | YDL155W                 | CLB3          |
| YPR030W                                          | CSR2          | YGL124C                 | MON1          |
| YOL145C                                          | CTR9          | YDR469W                 | SDC1          |
| YDR358W                                          | GGA1          | YDL137W                 | ARF2          |
| YLR043C                                          | TRX1          | YEL013W                 | VAC8          |
| YML115C                                          | VAN1          | YBR215W                 | HPC2          |
| YDL020C                                          | RPN4          | YKR072C                 | SIS2          |
| YLR119W                                          | SRN2          | YKL048C                 | ELM1          |
| YFR010W                                          | UBP6          | YBR107C                 | IML3          |
| YKL010C                                          | UFD4          | YJL095W                 | BCK1          |
| YJR140C                                          | HIR3          | YKL160W                 | ELF1          |
| YGL237C                                          | HAP2          | YHR115C                 | DMA1          |
| YJR024C                                          | MDE1          | YOL126C                 | MDH2          |
| YLR386W                                          | VAC14         | YNL107W                 | YAF9          |
| YFL033C                                          | RIM15         | YER122C                 | GLO3          |
| YER144C                                          | UBP5          | YBL025W                 | RRN10         |

| Predictions at threshold level 0.75 continued... |               |                         |               |
|--------------------------------------------------|---------------|-------------------------|---------------|
| Gene1 of predicted pair                          |               | Gene2 of predicted pair |               |
| Systematic Name                                  | Standard Name | Systematic Name         | Standard Name |
| YGR104C                                          | SRB5          | YDR146C                 | SWI5          |
| YHR013C                                          | ARD1          | YKR020W                 | VPS51         |
| YBL058W                                          | SHP1          | YNL087W                 | TCB2          |
| YDR358W                                          | GGA1          | YDR207C                 | UME6          |
| YOR132W                                          | VPS17         | YPR032W                 | SRO7          |
| YFR031C-A                                        | RPL2A         | YCR053W                 | THR4          |
| YMR116C                                          | ASC1          | YKL041W                 | VPS24         |
| YBR171W                                          | SEC66         | YBR114W                 | RAD16         |
| YMR224C                                          | MRE11         | YDR225W                 | HTA1          |
| YPL240C                                          | HSP82         | YCR040W                 | MATALPHA1     |
| YNL069C                                          | RPL16B        | YLR360W                 | VPS38         |
| YMR216C                                          | SKY1          | YJR060W                 | CBF1          |
| YCR077C                                          | PAT1          | YGL151W                 | NUT1          |
| YEL022W                                          | GEA2          | YLR039C                 | RIC1          |
| YLR288C                                          | MEC3          | YER116C                 | SLX8          |
| YLR386W                                          | VAC14         | YKL110C                 | KTI12         |
| YIL153W                                          | RRD1          | YGL190C                 | CDC55         |
| YLR309C                                          | IMH1          | YAL002W                 | VPS8          |
| YGL200C                                          | EMP24         | YGR105W                 | VMA21         |
| YDL155W                                          | CLB3          | YDR289C                 | RTT103        |
| YBR009C                                          | HHF1          | YLR357W                 | RSC2          |
| YNL248C                                          | RPA49         | YPL018W                 | CTF19         |
| YML103C                                          | NUP188        | YPL256C                 | CLN2          |
| YGL147C                                          | RPL9A         | YBR030W                 | YBR030W       |
| YGR241C                                          | YAP1802       | YDR323C                 | PEP7          |
| YML012W                                          | ERV25         | YGL054C                 | ERV14         |
| YMR284W                                          | YKU70         | YJL124C                 | LSM1          |
| YIL034C                                          | CAP2          | YNL307C                 | MCK1          |
| YNL238W                                          | KEX2          | YMR214W                 | SCJ1          |

| Predictions at threshold level 0.75 continued... |               |                         |               |
|--------------------------------------------------|---------------|-------------------------|---------------|
| Gene1 of predicted pair                          |               | Gene2 of predicted pair |               |
| Systematic Name                                  | Standard Name | Systematic Name         | Standard Name |
| YHR134W                                          | WSS1          | YOR358W                 | HAP5          |
| YEL065W                                          | SIT1          | YLR410W                 | VIP1          |
| YLR061W                                          | RPL22A        | YJR084W                 | CSN12         |
| YDL006W                                          | PTC1          | YKL161C                 | YKL161C       |
| YGR104C                                          | SRB5          | YEL036C                 | ANP1          |
| YJL127C                                          | SPT10         | YMR106C                 | YKU80         |
| YNL206C                                          | RTT106        | YLR399C                 | BDF1          |
| YMR039C                                          | SUB1          | YMR055C                 | BUB2          |
| YJL117W                                          | PHO86         | YJL095W                 | BCK1          |
| YGL033W                                          | HOP2          | YJR056C                 | YJR056C       |
| YEL053C                                          | MAK10         | YPR030W                 | CSR2          |
| YPR120C                                          | CLB5          | YNL079C                 | TPM1          |
| YDL116W                                          | NUP84         | YDR363W-A               | SEM1          |
| YKR061W                                          | KTR2          | YPL253C                 | VIK1          |
| YFR030W                                          | MET10         | YOR141C                 | ARP8          |
| YDR174W                                          | HMO1          | YPL253C                 | VIK1          |
| YOR083W                                          | WHI5          | YPR131C                 | NAT3          |
| YER049W                                          | TPA1          | YLR425W                 | TUS1          |
| YLR135W                                          | SLX4          | YHR167W                 | THP2          |
| YDR244W                                          | PEX5          | YLR284C                 | ECI1          |
| YDR245W                                          | MNN10         | YGR270W                 | YTA7          |
| YDR289C                                          | RTT103        | YGR188C                 | BUB1          |
| YER116C                                          | SLX8          | YOL121C                 | RPS19A        |
| YLL007C                                          | YLL007C       | YDR310C                 | SUM1          |
| YDR129C                                          | SAC6          | YER001W                 | MNN1          |
| YAL024C                                          | LTE1          | YLR006C                 | SSK1          |
| YHR111W                                          | UBA4          | YDL006W                 | PTC1          |
| YPR046W                                          | MCM16         | YEL060C                 | PRB1          |
| YBL058W                                          | SHP1          | YNL325C                 | FIG4          |

| Predictions at threshold level 0.75 continued... |               |                         |               |
|--------------------------------------------------|---------------|-------------------------|---------------|
| Gene1 of predicted pair                          |               | Gene2 of predicted pair |               |
| Systematic Name                                  | Standard Name | Systematic Name         | Standard Name |
| YMR116C                                          | ASC1          | YJR035W                 | RAD26         |
| YKL126W                                          | YPK1          | YEL053C                 | MAK10         |
| YMR127C                                          | SAS2          | YGR270W                 | YTA7          |
| YLR216C                                          | CPR6          | YDR260C                 | SWM1          |
| YMR142C                                          | RPL13B        | YMR214W                 | SCJ1          |
| YBR030W                                          | YBR030W       | YER122C                 | GLO3          |
| YMR054W                                          | STV1          | YAL002W                 | VPS8          |
| YOR080W                                          | DIA2          | YNL199C                 | GCR2          |
| YBR108W                                          | YBR108W       | YDR318W                 | MCM21         |
| YLR337C                                          | VRP1          | YOR358W                 | HAP5          |
| YKR061W                                          | KTR2          | YPR120C                 | CLB5          |
| YOR132W                                          | VPS17         | YDL155W                 | CLB3          |
| YMR142C                                          | RPL13B        | YNL058C                 | YNL058C       |
| YPL161C                                          | BEM4          | YDR309C                 | GIC2          |
| YNR058W                                          | BIO3          | YLR094C                 | GIS3          |
| YHL031C                                          | GOS1          | YLR182W                 | SWI6          |
| YMR313C                                          | TGL3          | YKL094W                 | YJU3          |
| YHR205W                                          | SCH9          | YJL095W                 | BCK1          |
| YBL021C                                          | HAP3          | YJR135C                 | MCM22         |
| YMR199W                                          | CLN1          | YGL031C                 | RPL24A        |
| YIR003W                                          | YIR003W       | YPR171W                 | BSP1          |
| YBR173C                                          | UMP1          | YJL183W                 | MNN11         |
| YOR290C                                          | SNF2          | YFR036W                 | CDC26         |
| YDR153C                                          | ENT5          | YNR032W                 | PPG1          |
| YPL195W                                          | APL5          | YMR311C                 | GLC8          |
| YDR200C                                          | VPS64         | YMR052W                 | FAR3          |
| YBL058W                                          | SHP1          | YLR320W                 | MMS22         |
| YHR056C                                          | RSC30         | YMR038C                 | CCS1          |
| YMR095C                                          | SNO1          | YMR311C                 | GLC8          |



| Predictions at threshold level 0.75 continued... |               |                         |               |
|--------------------------------------------------|---------------|-------------------------|---------------|
| Gene1 of predicted pair                          |               | Gene2 of predicted pair |               |
| Systematic Name                                  | Standard Name | Systematic Name         | Standard Name |
| YPL256C                                          | CLN2          | YMR052W                 | FAR3          |
| YCR077C                                          | PAT1          | YER122C                 | GLO3          |
| YOL111C                                          | MDY2          | YDR207C                 | UME6          |
| YGL115W                                          | SNF4          | YLR371W                 | ROM2          |
| YEL053C                                          | MAK10         | YDR289C                 | RTT103        |
| YMR016C                                          | SOK2          | YBL103C                 | RTG3          |
| YJR040W                                          | GEF1          | YAR014C                 | BUD14         |
| YPR131C                                          | NAT3          | YKR024C                 | DBP7          |
| YOR109W                                          | INP53         | YNL041C                 | COG6          |
| YNL325C                                          | FIG4          | YDR207C                 | UME6          |
| YGL212W                                          | VAM7          | YLR180W                 | SAM1          |
| YER019C-A                                        | SBH2          | YHR200W                 | RPN10         |
| YBR108W                                          | YBR108W       | YLR093C                 | NYV1          |
| YKR014C                                          | YPT52         | YBR082C                 | UBC4          |
| YBR126C                                          | TPS1          | YFL023W                 | BUD27         |
| YCR065W                                          | HCM1          | YLR452C                 | SST2          |
| YKL048C                                          | ELM1          | YHR114W                 | BZZ1          |
| YEL027W                                          | CUP5          | YER072W                 | VTC1          |
| YIL007C                                          | NAS2          | YER105C                 | NUP157        |
| YFR031C-A                                        | RPL2A         | YBL025W                 | RRN10         |
| YOR275C                                          | RIM20         | YHR115C                 | DMA1          |
| YNL106C                                          | INP52         | YLR135W                 | SLX4          |
| YOR195W                                          | SLK19         | YOR141C                 | ARP8          |
| YNL273W                                          | TOF1          | YHR056C                 | RSC30         |
| YBL025W                                          | RRN10         | YCR053W                 | THR4          |
| YDL155W                                          | CLB3          | YJL095W                 | BCK1          |
| YGR019W                                          | UGA1          | YDR289C                 | RTT103        |
| YLR064W                                          | YLR064W       | YOR284W                 | HUA2          |
| YDR183W                                          | PLP1          | YJL190C                 | RPS22A        |

| Predictions at threshold level 0.75 continued... |               |                         |               |
|--------------------------------------------------|---------------|-------------------------|---------------|
| Gene1 of predicted pair                          |               | Gene2 of predicted pair |               |
| Systematic Name                                  | Standard Name | Systematic Name         | Standard Name |
| YER115C                                          | SPR6          | YGR059W                 | SPR3          |
| YPL037C                                          | EGD1          | YNR032W                 | PPG1          |
| YGR252W                                          | GCN5          | YHL011C                 | PRS3          |
| YKL126W                                          | YPK1          | YHR081W                 | LRP1          |
| YBR200W                                          | BEM1          | YBL085W                 | BOI1          |
| YAL024C                                          | LTE1          | YGL124C                 | MON1          |
| YGL060W                                          | YBP2          | YBR194W                 | SOY1          |
| YFR031C-A                                        | RPL2A         | YMR095C                 | SNO1          |
| YMR153W                                          | NUP53         | YGR059W                 | SPR3          |
| YGL095C                                          | VPS45         | YOL018C                 | TLG2          |
| YNR052C                                          | POP2          | YDL013W                 | SLX5          |
| YEL043W                                          | YEL043W       | YKR030W                 | GMH1          |
| YGL151W                                          | NUT1          | YHR114W                 | BZZ1          |
| YBR082C                                          | UBC4          | YGL031C                 | RPL24A        |
| YKR099W                                          | BAS1          | YJL095W                 | BCK1          |
| YOR270C                                          | VPH1          | YMR214W                 | SCJ1          |
| YBR108W                                          | YBR108W       | YPR030W                 | CSR2          |
| YBL103C                                          | RTG3          | YOR035C                 | SHE4          |
| YCR088W                                          | ABP1          | YLR429W                 | CRN1          |
| YKR061W                                          | KTR2          | YNL307C                 | MCK1          |
| YER115C                                          | SPR6          | YML057W                 | CMP2          |
| YBR131W                                          | CCZ1          | YJR033C                 | RAV1          |
| YPR120C                                          | CLB5          | YDL006W                 | PTC1          |
| YDR245W                                          | MNN10         | YKL048C                 | ELM1          |
| YDR183W                                          | PLP1          | YOR141C                 | ARP8          |
| YER001W                                          | MNN1          | YBL072C                 | RPS8A         |
| YNR052C                                          | POP2          | YGL031C                 | RPL24A        |
| YER120W                                          | SCS2          | YJL004C                 | SYS1          |
| YBR228W                                          | SLX1          | YCR086W                 | CSM1          |

| Predictions at threshold level 0.75 continued... |               |                         |               |
|--------------------------------------------------|---------------|-------------------------|---------------|
| Gene1 of predicted pair                          |               | Gene2 of predicted pair |               |
| Systematic Name                                  | Standard Name | Systematic Name         | Standard Name |
| YCL067C                                          | HMLALPHA2     | YKL181W                 | PRS1          |
| YMR142C                                          | RPL13B        | YGL124C                 | MON1          |
| YJR140C                                          | HIR3          | YOR038C                 | HIR2          |
| YDL247W                                          | MPH2          | YPL240C                 | HSP82         |
| YLR452C                                          | SST2          | YGL124C                 | MON1          |
| YLR399C                                          | BDF1          | YGL163C                 | RAD54         |
| YEL065W                                          | SIT1          | YLR306W                 | UBC12         |
| YHR200W                                          | RPN10         | YLR306W                 | UBC12         |
| YBR131W                                          | CCZ1          | YPR028W                 | YOP1          |
| YOR109W                                          | INP53         | YGR105W                 | VMA21         |
| YBR200W                                          | BEM1          | YJL190C                 | RPS22A        |
| YDR309C                                          | GIC2          | YHR115C                 | DMA1          |
| YLR337C                                          | VRP1          | YNL288W                 | CAF40         |
| YLR441C                                          | RPS1A         | YBL025W                 | RRN10         |
| YMR224C                                          | MRE11         | YHR039C-A               | VMA10         |
| YBL103C                                          | RTG3          | YKR099W                 | BAS1          |
| YLR093C                                          | NYV1          | YBL025W                 | RRN10         |
| YER116C                                          | SLX8          | YJR035W                 | RAD26         |
| YLR288C                                          | MEC3          | YBR173C                 | UMP1          |
| YNL325C                                          | FIG4          | YKR099W                 | BAS1          |
| YPL195W                                          | APL5          | YOR035C                 | SHE4          |
| YJL124C                                          | LSM1          | YLR315W                 | NKP2          |
| YPL057C                                          | SUR1          | YDL223C                 | HBT1          |
| YOL041C                                          | NOP12         | YNL175C                 | NOP13         |
| YER139C                                          | YER139C       | YLR370C                 | ARC18         |
| YGL087C                                          | MMS2          | YER116C                 | SLX8          |
| YMR026C                                          | PEX12         | YMR153W                 | NUP53         |
| YOR127W                                          | RGA1          | YER122C                 | GLO3          |
| YMR095C                                          | SNO1          | YNL325C                 | FIG4          |

| Predictions at threshold level 0.75 continued... |               |                         |               |
|--------------------------------------------------|---------------|-------------------------|---------------|
| Gene1 of predicted pair                          |               | Gene2 of predicted pair |               |
| Systematic Name                                  | Standard Name | Systematic Name         | Standard Name |
| YFR031C-A                                        | RPL2A         | YCR020C-A               | MAK31         |
| YPR036W                                          | VMA13         | YNL041C                 | COG6          |
| YPL240C                                          | HSP82         | YHR187W                 | IKI1          |
| YDR363W-A                                        | SEM1          | YLR315W                 | NKP2          |
| YLR399C                                          | BDF1          | YKL048C                 | ELM1          |
| YBR228W                                          | SLX1          | YGR071C                 | YGR071C       |
| YMR224C                                          | MRE11         | YOL030W                 | GAS5          |
| YNL199C                                          | GCR2          | YER096W                 | SHC1          |
| YKL126W                                          | YPK1          | YBR280C                 | SAF1          |
| YEL053C                                          | MAK10         | YNL041C                 | COG6          |
| YGL003C                                          | CDH1          | YLR032W                 | RAD5          |
| YLR192C                                          | HCR1          | YNL238W                 | KEX2          |
| YGR072W                                          | UPF3          | YCL001W                 | RER1          |
| YGL066W                                          | SGF73         | YDR318W                 | MCM21         |
| YKR099W                                          | BAS1          | YLR320W                 | MMS22         |
| YGL066W                                          | SGF73         | YBR111W-A               | SUS1          |
| YCR066W                                          | RAD18         | YPL161C                 | BEM4          |
| YKL126W                                          | YPK1          | YJL164C                 | TPK1          |
| YJR059W                                          | PTK2          | YCR024C-A               | PMP1          |
| YJL136C                                          | RPS21B        | YDR363W-A               | SEM1          |
| YIL076W                                          | SEC28         | YHR060W                 | VMA22         |
| YBR215W                                          | HPC2          | YLR315W                 | NKP2          |
| YKL025C                                          | PAN3          | YDR155C                 | CPR1          |
| YLR090W                                          | XDJ1          | YML115C                 | VAN1          |
| YGL252C                                          | RTG2          | YOR208W                 | PTP2          |
| YJL176C                                          | SWI3          | YHR013C                 | ARD1          |
| YML001W                                          | YPT7          | YKR030W                 | GMH1          |
| YLR135W                                          | SLX4          | YER116C                 | SLX8          |
| YIL156W                                          | UBP7          | YPL246C                 | RBD2          |

| Predictions at threshold level 0.75 continued... |               |                         |               |
|--------------------------------------------------|---------------|-------------------------|---------------|
| Gene1 of predicted pair                          |               | Gene2 of predicted pair |               |
| Systematic Name                                  | Standard Name | Systematic Name         | Standard Name |
| YHL031C                                          | GOS1          | YLR447C                 | VMA6          |
| YBR057C                                          | MUM2          | YJR135C                 | MCM22         |
| YML115C                                          | VAN1          | YFL023W                 | BUD27         |
| YBR173C                                          | UMP1          | YLR441C                 | RPS1A         |
| YPR017C                                          | DSS4          | YDR153C                 | ENT5          |
| YPR036W                                          | VMA13         | YPR030W                 | CSR2          |
| YLR234W                                          | TOP3          | YNL147W                 | LSM7          |
| YLL039C                                          | UBI4          | YDR358W                 | GGA1          |
| YBL051C                                          | PIN4          | YKR048C                 | NAP1          |
| YDL052C                                          | SLC1          | YMR246W                 | FAA4          |
| YDR192C                                          | NUP42         | YML007W                 | YAP1          |
| YFR010W                                          | UBP6          | YCR053W                 | THR4          |
| YIL159W                                          | BNR1          | YNL325C                 | FIG4          |
| YBL047C                                          | EDE1          | YBL101C                 | ECM21         |
| YER144C                                          | UBP5          | YML071C                 | COG8          |
| YBL058W                                          | SHP1          | YBR200W                 | BEM1          |
| YPR120C                                          | CLB5          | YDL226C                 | GCS1          |
| YDR440W                                          | DOT1          | YBL025W                 | RRN10         |
| YLR441C                                          | RPS1A         | YDR310C                 | SUM1          |
| YOR312C                                          | RPL20B        | YMR089C                 | YTA12         |
| YJL176C                                          | SWI3          | YKL006W                 | RPL14A        |
| YPR120C                                          | CLB5          | YBR158W                 | AMN1          |
| YGR072W                                          | UPF3          | YCL037C                 | SRO9          |
| YKL213C                                          | DOA1          | YEL013W                 | VAC8          |
| YNL201C                                          | PSY2          | YJR060W                 | CBF1          |
| YCR086W                                          | CSM1          | YOL081W                 | IRA2          |
| YJR056C                                          | YJR056C       | YDR261C                 | EXG2          |
| YNL041C                                          | COG6          | YMR230W                 | RPS10B        |
| YEL056W                                          | HAT2          | YGL148W                 | ARO2          |

| Predictions at threshold level 0.75 continued... |               |                         |               |
|--------------------------------------------------|---------------|-------------------------|---------------|
| Gene1 of predicted pair                          |               | Gene2 of predicted pair |               |
| Systematic Name                                  | Standard Name | Systematic Name         | Standard Name |
| YPL057C                                          | SUR1          | YDL155W                 | CLB3          |
| YER122C                                          | GLO3          | YER040W                 | GLN3          |
| YIR009W                                          | MSL1          | YDR289C                 | RTT103        |
| YJL095W                                          | BCK1          | YNL107W                 | YAF9          |
| YDR443C                                          | SSN2          | YCR081W                 | SRB8          |
| YMR224C                                          | MRE11         | YBR217W                 | ATG12         |
| YFR032C-A                                        | RPL29         | YBL101C                 | ECM21         |
| YPL022W                                          | RAD1          | YDR254W                 | CHL4          |
| YNL218W                                          | MGS1          | YGL031C                 | RPL24A        |
| YIL053W                                          | RHR2          | YGL212W                 | VAM7          |
| YEL065W                                          | SIT1          | YCR053W                 | THR4          |
| YER116C                                          | SLX8          | YJL187C                 | SWE1          |
| YLR079W                                          | SIC1          | YNL199C                 | GCR2          |
| YPR084W                                          | YPR084W       | YER139C                 | YER139C       |
| YCR065W                                          | HCM1          | YFR010W                 | UBP6          |
| YKR014C                                          | YPT52         | YLR093C                 | NYV1          |
| YIL053W                                          | RHR2          | YDR261C                 | EXG2          |
| YER054C                                          | GIP2          | YML016C                 | PPZ1          |
| YJR032W                                          | CPR7          | YER162C                 | RAD4          |
| YMR080C                                          | NAM7          | YML103C                 | NUP188        |
| YPL259C                                          | APM1          | YDL192W                 | ARF1          |
| YHR081W                                          | LRP1          | YJR035W                 | RAD26         |
| YMR109W                                          | MYO5          | YBR260C                 | RGD1          |
| YGL178W                                          | MPT5          | YJL127C                 | SPT10         |
| YJL095W                                          | BCK1          | YGL031C                 | RPL24A        |
| YJR060W                                          | CBF1          | YFR036W                 | CDC26         |
| YPL115C                                          | BEM3          | YPL161C                 | BEM4          |
| YPR018W                                          | RLF2          | YNL079C                 | TPM1          |
| YLR216C                                          | CPR6          | YKR048C                 | NAP1          |

| Predictions at threshold level 0.75 continued... |               |                         |               |
|--------------------------------------------------|---------------|-------------------------|---------------|
| Gene1 of predicted pair                          |               | Gene2 of predicted pair |               |
| Systematic Name                                  | Standard Name | Systematic Name         | Standard Name |
| YBR065C                                          | ECM2          | YMR216C                 | SKY1          |
| YDR129C                                          | SAC6          | YDR378C                 | LSM6          |
| YHR052W                                          | CIC1          | YHR010W                 | RPL27A        |
| YDR080W                                          | VPS41         | YPL105C                 | YPL105C       |
| YNL076W                                          | MKS1          | YBR036C                 | CSG2          |
| YNL199C                                          | GCR2          | YOR308C                 | SNU66         |
| YJL172W                                          | CPS1          | YBR171W                 | SEC66         |
| YGL133W                                          | ITC1          | YPL256C                 | CLN2          |
| YEL009C                                          | GCN4          | YFR034C                 | PHO4          |
| YDL083C                                          | RPS16B        | YMR214W                 | SCJ1          |
| YOR127W                                          | RGA1          | YJL190C                 | RPS22A        |
| YAL024C                                          | LTE1          | YGL033W                 | HOP2          |
| YPL161C                                          | BEM4          | YOR035C                 | SHE4          |
| YKL025C                                          | PAN3          | YDR254W                 | CHL4          |
| YLR360W                                          | VPS38         | YML071C                 | COG8          |
| YHR156C                                          | LIN1          | YPL037C                 | EGD1          |
| YOR038C                                          | HIR2          | YDR289C                 | RTT103        |
| YNL032W                                          | SIW14         | YKL048C                 | ELM1          |
| YDR295C                                          | HDA2          | YOR195W                 | SLK19         |
| YNL209W                                          | SSB2          | YDR477W                 | SNF1          |
| YPL213W                                          | LEA1          | YHL002W                 | HSE1          |
| YPR018W                                          | RLF2          | YML028W                 | TSA1          |
| YNL307C                                          | MCK1          | YLR370C                 | ARC18         |
| YLR360W                                          | VPS38         | YBR260C                 | RGD1          |
| YMR202W                                          | ERG2          | YDR171W                 | HSP42         |
| YOL145C                                          | CTR9          | YJR060W                 | CBF1          |
| YKL126W                                          | YPK1          | YBL025W                 | RRN10         |
| YJL095W                                          | BCK1          | YHL011C                 | PRS3          |
| YDR293C                                          | SSD1          | YNL107W                 | YAF9          |

| Predictions at threshold level 0.75 continued... |               |                         |               |
|--------------------------------------------------|---------------|-------------------------|---------------|
| Gene1 of predicted pair                          |               | Gene2 of predicted pair |               |
| Systematic Name                                  | Standard Name | Systematic Name         | Standard Name |
| YGR108W                                          | CLB1          | YPR051W                 | MAK3          |
| YML115C                                          | VAN1          | YOR008C                 | SLG1          |
| YFR010W                                          | UBP6          | YBR173C                 | UMP1          |
| YNL032W                                          | SIW14         | YLR320W                 | MMS22         |
| YDR383C                                          | NKP1          | YDR335W                 | MSN5          |
| YBR194W                                          | SOY1          | YDR171W                 | HSP42         |
| YGR059W                                          | SPR3          | YML057W                 | CMP2          |
| YDL020C                                          | RPN4          | YNL166C                 | BNI5          |
| YPL161C                                          | BEM4          | YLR093C                 | NYV1          |
| YJR059W                                          | PTK2          | YKR024C                 | DBP7          |
| YJR060W                                          | CBF1          | YER162C                 | RAD4          |
| YOR332W                                          | VMA4          | YPL234C                 | TFP3          |
| YLR452C                                          | SST2          | YPL256C                 | CLN2          |
| YLR240W                                          | VPS34         | YDL161W                 | ENT1          |
| YOR106W                                          | VAM3          | YOR014W                 | RTS1          |
| YBR217W                                          | ATG12         | YBR030W                 | YBR030W       |
| YGL087C                                          | MMS2          | YHR013C                 | ARD1          |
| YJR040W                                          | GEF1          | YML001W                 | YPT7          |
| YHR060W                                          | VMA22         | YKL080W                 | VMA5          |
| YDR129C                                          | SAC6          | YBL072C                 | RPS8A         |
| YNL031C                                          | HHT2          | YPR072W                 | NOT5          |
| YGL087C                                          | MMS2          | YDR318W                 | MCM21         |
| YLR192C                                          | HCR1          | YMR016C                 | SOK2          |
| YML013W                                          | UBX2          | YGL003C                 | CDH1          |
| YBR107C                                          | IML3          | YLR254C                 | NDL1          |
| YBL078C                                          | ATG8          | YPL057C                 | SUR1          |
| YDR176W                                          | NGG1          | YGL221C                 | NIF3          |
| YLR360W                                          | VPS38         | YHR114W                 | BZZ1          |
| YEL065W                                          | SIT1          | YOR290C                 | SNF2          |



| Predictions at threshold level 0.75 continued... |               |                         |               |
|--------------------------------------------------|---------------|-------------------------|---------------|
| Gene1 of predicted pair                          |               | Gene2 of predicted pair |               |
| Systematic Name                                  | Standard Name | Systematic Name         | Standard Name |
| YGL133W                                          | ITC1          | YGL163C                 | RAD54         |
| YGL115W                                          | SNF4          | YLR429W                 | CRN1          |
| YKR035W-A                                        | DID2          | YMR311C                 | GLC8          |
| YER116C                                          | SLX8          | YJL095W                 | BCK1          |
| YLR094C                                          | GIS3          | YFR036W                 | CDC26         |
| YLR381W                                          | CTF3          | YOL054W                 | PSH1          |
| YBR126C                                          | TPS1          | YER116C                 | SLX8          |
| YBL088C                                          | TEL1          | YNR052C                 | POP2          |
| YDR293C                                          | SSD1          | YDL192W                 | ARF1          |
| YDR318W                                          | MCM21         | YEL056W                 | HAT2          |
| YDL116W                                          | NUP84         | YIL156W                 | UBP7          |
| YBL021C                                          | HAP3          | YJL190C                 | RPS22A        |
| YER044C                                          | ERG28         | YOL081W                 | IRA2          |
| YKL139W                                          | CTK1          | YKR048C                 | NAP1          |
| YBR173C                                          | UMP1          | YFL023W                 | BUD27         |
| YDR443C                                          | SSN2          | YPL256C                 | CLN2          |
| YLR090W                                          | XDJ1          | YMR152W                 | YIM1          |
| YLR386W                                          | VAC14         | YLR370C                 | ARC18         |
| YDL155W                                          | CLB3          | YBR114W                 | RAD16         |
| YMR095C                                          | SNO1          | YFR010W                 | UBP6          |
| YJL176C                                          | SWI3          | YDR358W                 | GGA1          |
| YCR024C-A                                        | PMP1          | YNL199C                 | GCR2          |
| YBR173C                                          | UMP1          | YDR358W                 | GGA1          |
| YDL020C                                          | RPN4          | YDR254W                 | CHL4          |
| YNL243W                                          | SLA2          | YLR064W                 | YLR064W       |
| YIL076W                                          | SEC28         | YMR152W                 | YIM1          |
| YOR358W                                          | HAP5          | YKR024C                 | DBP7          |
| YHR081W                                          | LRP1          | YPR046W                 | MCM16         |
| YPL161C                                          | BEM4          | YEL051W                 | VMA8          |

| Predictions at threshold level 0.75 continued... |               |                         |               |
|--------------------------------------------------|---------------|-------------------------|---------------|
| Gene1 of predicted pair                          |               | Gene2 of predicted pair |               |
| Systematic Name                                  | Standard Name | Systematic Name         | Standard Name |
| YOR023C                                          | AHC1          | YOR358W                 | HAP5          |
| YPL024W                                          | RMI1          | YDR076W                 | RAD55         |
| YPL024W                                          | RMI1          | YDR071C                 | PAA1          |
| YGL078C                                          | DBP3          | YLR386W                 | VAC14         |
| YBR030W                                          | YBR030W       | YLR180W                 | SAM1          |
| YML058W                                          | SML1          | YBR274W                 | CHK1          |
| YDR320C                                          | SWA2          | YPL037C                 | EGD1          |
| YKR061W                                          | KTR2          | YLR182W                 | SWI6          |
| YDR448W                                          | ADA2          | YLR399C                 | BDF1          |
| YJL154C                                          | VPS35         | YDR293C                 | SSD1          |
| YLR094C                                          | GIS3          | YBR280C                 | SAF1          |
| YDL020C                                          | RPN4          | YKR001C                 | VPS1          |
| YHR052W                                          | CIC1          | YKR024C                 | DBP7          |
| YLR386W                                          | VAC14         | YGL025C                 | PGD1          |
| YNL206C                                          | RTT106        | YHR200W                 | RPN10         |
| YDL002C                                          | NHP10         | YOR043W                 | WHI2          |
| YLR315W                                          | NKP2          | YFR036W                 | CDC26         |
| YFR030W                                          | MET10         | YNL116W                 | DMA2          |
| YPL024W                                          | RMI1          | YLR032W                 | RAD5          |
| YGR072W                                          | UPF3          | YNL297C                 | MON2          |
| YJL154C                                          | VPS35         | YHR114W                 | BZZ1          |
| YKL139W                                          | CTK1          | YHR039C-A               | VMA10         |
| YHR171W                                          | ATG7          | YLR093C                 | NYV1          |
| YOR058C                                          | ASE1          | YGL190C                 | CDC55         |
| YIL008W                                          | URM1          | YNL107W                 | YAF9          |
| YPL129W                                          | TAF14         | YJL124C                 | LSM1          |
| YMR004W                                          | MVP1          | YDR310C                 | SUM1          |
| YNL291C                                          | MID1          | YDL155W                 | CLB3          |
| YMR142C                                          | RPL13B        | YBL025W                 | RRN10         |

| Predictions at threshold level 0.75 continued... |               |                         |               |
|--------------------------------------------------|---------------|-------------------------|---------------|
| Gene1 of predicted pair                          |               | Gene2 of predicted pair |               |
| Systematic Name                                  | Standard Name | Systematic Name         | Standard Name |
| YLR090W                                          | XDJ1          | YJR084W                 | CSN12         |
| YHR200W                                          | RPN10         | YLR182W                 | SWI6          |
| YDR293C                                          | SSD1          | YMR109W                 | MYO5          |
| YPL253C                                          | VIK1          | YLR447C                 | VMA6          |
| YLL007C                                          | YLL007C       | YPL115C                 | BEM3          |
| YLR018C                                          | POM34         | YFL047W                 | RGD2          |
| YBR188C                                          | NTC20         | YKL074C                 | MUD2          |
| YLR381W                                          | CTF3          | YLR410W                 | VIP1          |
| YPL195W                                          | APL5          | YOL081W                 | IRA2          |
| YOL018C                                          | TLG2          | YER122C                 | GLO3          |
| YJR056C                                          | YJR056C       | YDL223C                 | HBT1          |
| YBR195C                                          | MSI1          | YPR120C                 | CLB5          |
| YGL237C                                          | HAP2          | YBR107C                 | IML3          |
| YER114C                                          | BOI2          | YER124C                 | DSE1          |
| YBR194W                                          | SOY1          | YJR005W                 | APL1          |
| YJR058C                                          | APS2          | YDL006W                 | PTC1          |
| YOR337W                                          | TEA1          | YGL124C                 | MON1          |
| YER161C                                          | SPT2          | YOR124C                 | UBP2          |
| YBL079W                                          | NUP170        | YJR035W                 | RAD26         |
| YGL197W                                          | MDS3          | YDL155W                 | CLB3          |
| YHR039C-A                                        | VMA10         | YLR180W                 | SAM1          |
| YNL238W                                          | KEX2          | YEL060C                 | PRB1          |
| YGL033W                                          | HOP2          | YNL238W                 | KEX2          |
| YGL087C                                          | MMS2          | YLR292C                 | SEC72         |
| YDR451C                                          | YHP1          | YCR040W                 | MATALPHA1     |
| YHR060W                                          | VMA22         | YNL107W                 | YAF9          |
| YNL041C                                          | COG6          | YOL108C                 | INO4          |
| YMR198W                                          | CIK1          | YKL114C                 | APN1          |
| YMR167W                                          | MLH1          | YOL081W                 | IRA2          |

| Predictions at threshold level 0.75 continued... |               |                         |               |
|--------------------------------------------------|---------------|-------------------------|---------------|
| Gene1 of predicted pair                          |               | Gene2 of predicted pair |               |
| Systematic Name                                  | Standard Name | Systematic Name         | Standard Name |
| YPR018W                                          | RLF2          | YNL117W                 | MLS1          |
| YDR378C                                          | LSM6          | YDR318W                 | MCM21         |
| YOR324C                                          | FRT1          | YLR433C                 | CNA1          |
| YML058W                                          | SML1          | YML006C                 | GIS4          |
| YNL032W                                          | SIW14         | YDR358W                 | GGA1          |
| YDL116W                                          | NUP84         | YOL030W                 | GAS5          |
| YDR320C                                          | SWA2          | YDL077C                 | VAM6          |
| YOR270C                                          | VPH1          | YDR202C                 | RAV2          |
| YJL176C                                          | SWI3          | YJL183W                 | MNN11         |
| YEL065W                                          | SIT1          | YMR230W                 | RPS10B        |
| YEL053C                                          | MAK10         | YNL238W                 | KEX2          |
| YGR020C                                          | VMA7          | YOR109W                 | INP53         |
| YPL234C                                          | TFP3          | YGR105W                 | VMA21         |
| YLR320W                                          | MMS22         | YOR368W                 | RAD17         |
| YNL025C                                          | SSN8          | YCR077C                 | PAT1          |
| YJR040W                                          | GEF1          | YPL161C                 | BEM4          |
| YAL024C                                          | LTE1          | YDR207C                 | UME6          |
| YNL041C                                          | COG6          | YPR046W                 | MCM16         |
| YLR386W                                          | VAC14         | YMR199W                 | CLN1          |
| YDR293C                                          | SSD1          | YKR028W                 | SAP190        |
| YNL206C                                          | RTT106        | YDR379W                 | RGA2          |
| YCL034W                                          | LSB5          | YPR119W                 | CLB2          |
| YNL087W                                          | TCB2          | YHR200W                 | RPN10         |
| YGL135W                                          | RPL1B         | YLR131C                 | ACE2          |
| YDR335W                                          | MSN5          | YCR086W                 | CSM1          |
| YPL024W                                          | RMI1          | YEL060C                 | PRB1          |
| YNL068C                                          | FKH2          | YGL031C                 | RPL24A        |
| YPL161C                                          | BEM4          | YJL187C                 | SWE1          |
| YPL042C                                          | SSN3          | YDR245W                 | MNN10         |

| Predictions at threshold level 0.75 continued... |               |                         |               |
|--------------------------------------------------|---------------|-------------------------|---------------|
| Gene1 of predicted pair                          |               | Gene2 of predicted pair |               |
| Systematic Name                                  | Standard Name | Systematic Name         | Standard Name |
| YDL101C                                          | DUN1          | YOL043C                 | NTG2          |
| YLR079W                                          | SIC1          | YLR315W                 | NKP2          |
| YGL174W                                          | BUD13         | YER139C                 | YER139C       |
| YPR051W                                          | MAK3          | YGL124C                 | MON1          |
| YPR084W                                          | YPR084W       | YKL139W                 | CTK1          |
| YDR469W                                          | SDC1          | YGL003C                 | CDH1          |
| YDR156W                                          | RPA14         | YDR289C                 | RTT103        |
| YJL124C                                          | LSM1          | YDR440W                 | DOT1          |
| YCL027W                                          | FUS1          | YER032W                 | FIR1          |
| YML095C                                          | RAD10         | YMR055C                 | BUB2          |
| YGL087C                                          | MMS2          | YOR132W                 | VPS17         |
| YPR131C                                          | NAT3          | YJR060W                 | CBF1          |
| YJL204C                                          | RCY1          | YEL051W                 | VMA8          |
| YBR173C                                          | UMP1          | YBR280C                 | SAF1          |
| YDL161W                                          | ENT1          | YOR035C                 | SHE4          |
| YPL115C                                          | BEM3          | YLR337C                 | VRP1          |
| YML051W                                          | GAL80         | YPL248C                 | GAL4          |
| YPL195W                                          | APL5          | YEL051W                 | VMA8          |
| YDR379W                                          | RGA2          | YGR135W                 | PRE9          |
| YPL050C                                          | MNN9          | YKL041W                 | VPS24         |
| YCR020C-A                                        | MAK31         | YLR360W                 | VPS38         |
| YDR156W                                          | RPA14         | YLR410W                 | VIP1          |
| YGR108W                                          | CLB1          | YOR023C                 | AHC1          |
| YNL229C                                          | URE2          | YKL101W                 | HSL1          |
| YPR017C                                          | DSS4          | YHL020C                 | OPI1          |
| YER068W                                          | MOT2          | YBR010W                 | HHT1          |
| YLR315W                                          | NKP2          | YEL013W                 | VAC8          |
| YJL029C                                          | VPS53         | YOR036W                 | PEP12         |
| YMR055C                                          | BUB2          | YDR310C                 | SUM1          |

| Predictions at threshold level 0.75 continued... |               |                         |               |
|--------------------------------------------------|---------------|-------------------------|---------------|
| Gene1 of predicted pair                          |               | Gene2 of predicted pair |               |
| Systematic Name                                  | Standard Name | Systematic Name         | Standard Name |
| YGL115W                                          | SNF4          | YLR309C                 | IMH1          |
| YER139C                                          | YER139C       | YNL076W                 | MKS1          |
| YGL223C                                          | COG1          | YPL050C                 | MNN9          |
| YHR081W                                          | LRP1          | YLR370C                 | ARC18         |
| YGL078C                                          | DBP3          | YGL124C                 | MON1          |
| YJL183W                                          | MNN11         | YMR038C                 | CCS1          |
| YOR035C                                          | SHE4          | YLR398C                 | SKI2          |
| YHR144C                                          | DCD1          | YPL240C                 | HSP82         |
| YGR072W                                          | UPF3          | YGL223C                 | COG1          |
| YLR234W                                          | TOP3          | YDR183W                 | PLP1          |
| YDR153C                                          | ENT5          | YDR310C                 | SUM1          |
| YMR026C                                          | PEX12         | YGL003C                 | CDH1          |
| YLR058C                                          | SHM2          | YMR202W                 | ERG2          |
| YBL079W                                          | NUP170        | YDR207C                 | UME6          |
| YDR320C                                          | SWA2          | YDR207C                 | UME6          |
| YHR013C                                          | ARD1          | YML071C                 | COG8          |
| YPL105C                                          | YPL105C       | YJR033C                 | RAV1          |
| YBR274W                                          | CHK1          | YJL124C                 | LSM1          |
| YKL025C                                          | PAN3          | YNL107W                 | YAF9          |
| YGL251C                                          | HFM1          | YDR378C                 | LSM6          |
| YMR199W                                          | CLN1          | YFL047W                 | RGD2          |
| YLR120C                                          | YPS1          | YHL031C                 | GOS1          |
| YGR072W                                          | UPF3          | YJR040W                 | GEF1          |
| YFL023W                                          | BUD27         | YJR090C                 | GRR1          |
| YDL006W                                          | PTC1          | YHR108W                 | GGA2          |
| YDR320C                                          | SWA2          | YCL037C                 | SRO9          |
| YHL020C                                          | OPI1          | YPR032W                 | SRO7          |
| YIL159W                                          | BNR1          | YLR180W                 | SAM1          |
| YPL115C                                          | BEM3          | YDR144C                 | MKC7          |

| Predictions at threshold level 0.75 continued... |               |                         |               |
|--------------------------------------------------|---------------|-------------------------|---------------|
| Gene1 of predicted pair                          |               | Gene2 of predicted pair |               |
| Systematic Name                                  | Standard Name | Systematic Name         | Standard Name |
| YDL020C                                          | RPN4          | YIL007C                 | NAS2          |
| YML016C                                          | PPZ1          | YLR263W                 | RED1          |
| YJL187C                                          | SWE1          | YJR090C                 | GRR1          |
| YPL096C-A                                        | ERI1          | YNL271C                 | BNI1          |
| YCR020C-A                                        | MAK31         | YDL077C                 | VAM6          |
| YJL124C                                          | LSM1          | YDR207C                 | UME6          |
| YLR410W                                          | VIP1          | YJR135C                 | MCM22         |
| YIL159W                                          | BNR1          | YBR171W                 | SEC66         |
| YCR063W                                          | BUD31         | YPL213W                 | LEA1          |
| YKL116C                                          | PRR1          | YPL057C                 | SUR1          |
| YGR133W                                          | PEX4          | YDR265W                 | PEX10         |
| YJL060W                                          | BNA3          | YBR194W                 | SOY1          |
| YOL121C                                          | RPS19A        | YMR152W                 | YIM1          |
| YIL053W                                          | RHR2          | YNL032W                 | SIW14         |
| YMR055C                                          | BUB2          | YBR195C                 | MSI1          |
| YLR119W                                          | SRN2          | YNL238W                 | KEX2          |
| YDR443C                                          | SSN2          | YFR036W                 | CDC26         |
| YDR289C                                          | RTT103        | YGL246C                 | RAI1          |
| YFR031C-A                                        | RPL2A         | YJL172W                 | CPS1          |
| YMR153W                                          | NUP53         | YBL025W                 | RRN10         |
| YJR140C                                          | HIR3          | YBR195C                 | MSI1          |
| YKR020W                                          | VPS51         | YKL119C                 | VPH2          |
| YPL037C                                          | EGD1          | YMR152W                 | YIM1          |
| YCR034W                                          | FEN1          | YKR059W                 | TIF1          |
| YMR214W                                          | SCJ1          | YMR230W                 | RPS10B        |
| YLR119W                                          | SRN2          | YOR035C                 | SHE4          |
| YFR031C-A                                        | RPL2A         | YER116C                 | SLX8          |
| YDL006W                                          | PTC1          | YMR054W                 | STV1          |
| YOL111C                                          | MDY2          | YLR320W                 | MMS22         |

| Predictions at threshold level 0.75 continued... |               |                         |               |
|--------------------------------------------------|---------------|-------------------------|---------------|
| Gene1 of predicted pair                          |               | Gene2 of predicted pair |               |
| Systematic Name                                  | Standard Name | Systematic Name         | Standard Name |
| YMR026C                                          | PEX12         | YKL139W                 | CTK1          |
| YOR069W                                          | VPS5          | YJL004C                 | SYS1          |
| YBR215W                                          | HPC2          | YLR350W                 | ORM2          |
| YFR032C-A                                        | RPL29         | YDR245W                 | MNN10         |
| YLL007C                                          | YLL007C       | YHR114W                 | BZZ1          |
| YDL006W                                          | PTC1          | YPL256C                 | CLN2          |
| YNL307C                                          | MCK1          | YGL115W                 | SNF4          |
| YNL243W                                          | SLA2          | YDL047W                 | SIT4          |
| YLR095C                                          | IOC2          | YJL172W                 | CPS1          |
| YHR073W                                          | OSH3          | YNL199C                 | GCR2          |
| YJL172W                                          | CPS1          | YDL223C                 | HBT1          |
| YLR234W                                          | TOP3          | YGL031C                 | RPL24A        |
| YDR108W                                          | GSG1          | YKR020W                 | VPS51         |
| YLR240W                                          | VPS34         | YJL154C                 | VPS35         |
| YIL159W                                          | BNR1          | YMR109W                 | MYO5          |
| YPL195W                                          | APL5          | YBR280C                 | SAF1          |
| YPL057C                                          | SUR1          | YDR358W                 | GGA1          |
| YPR052C                                          | NHP6A         | YNL030W                 | HHF2          |
| YPR084W                                          | YPR084W       | YDR153C                 | ENT5          |
| YDR174W                                          | HMO1          | YJR060W                 | CBF1          |
| YIL076W                                          | SEC28         | YLR320W                 | MMS22         |
| YIL159W                                          | BNR1          | YBR173C                 | UMP1          |
| YCL037C                                          | SRO9          | YML001W                 | YPT7          |
| YCR081W                                          | SRB8          | YLR360W                 | VPS38         |
| YPL018W                                          | CTF19         | YDL047W                 | SIT4          |
| YLR320W                                          | MMS22         | YJR032W                 | CPR7          |
| YOR069W                                          | VPS5          | YNL044W                 | YIP3          |
| YER044C                                          | ERG28         | YJL095W                 | BCK1          |
| YFR036W                                          | CDC26         | YPL195W                 | APL5          |



| Predictions at threshold level 0.75 continued... |               |                         |               |
|--------------------------------------------------|---------------|-------------------------|---------------|
| Gene1 of predicted pair                          |               | Gene2 of predicted pair |               |
| Systematic Name                                  | Standard Name | Systematic Name         | Standard Name |
| YBR114W                                          | RAD16         | YAR014C                 | BUD14         |
| YLR337C                                          | VRP1          | YGL200C                 | EMP24         |
| YDR265W                                          | PEX10         | YGL153W                 | PEX14         |
| YKR059W                                          | TIF1          | YOR039W                 | CKB2          |
| YNL106C                                          | INP52         | YGR071C                 | YGR071C       |
| YNL068C                                          | FKH2          | YKL032C                 | IXR1          |
| YJL124C                                          | LSM1          | YNL236W                 | SIN4          |
| YHR084W                                          | STE12         | YPL220W                 | RPL1A         |
| YJL036W                                          | SNX4          | YDL006W                 | PTC1          |
| YNL297C                                          | MON2          | YPL195W                 | APL5          |
| YOR069W                                          | VPS5          | YGL115W                 | SNF4          |
| YLR386W                                          | VAC14         | YNL054W                 | VAC7          |
| YPL115C                                          | BEM3          | YIL008W                 | URM1          |
| YJL053W                                          | PEP8          | YER122C                 | GLO3          |
| YGL212W                                          | VAM7          | YLR371W                 | ROM2          |
| YFR031C-A                                        | RPL2A         | YGL033W                 | HOP2          |
| YOR080W                                          | DIA2          | YDR171W                 | HSP42         |
| YML063W                                          | RPS1B         | YLR441C                 | RPS1A         |
| YGR020C                                          | VMA7          | YLR309C                 | IMH1          |
| YKL214C                                          | YRA2          | YCL011C                 | GBP2          |
| YKR035W-A                                        | DID2          | YGL124C                 | MON1          |
| YML103C                                          | NUP188        | YOL081W                 | IRA2          |
| YLR090W                                          | XDJ1          | YNL032W                 | SIW14         |
| YER139C                                          | YER139C       | YER122C                 | GLO3          |
| YKL025C                                          | PAN3          | YOR023C                 | AHC1          |
| YOR195W                                          | SLK19         | YNL225C                 | CNM67         |
| YOR132W                                          | VPS17         | YML001W                 | YPT7          |
| YPL129W                                          | TAF14         | YDR289C                 | RTT103        |
| YOR035C                                          | SHE4          | YPL259C                 | APM1          |

| Predictions at threshold level 0.75 continued... |               |                         |               |
|--------------------------------------------------|---------------|-------------------------|---------------|
| Gene1 of predicted pair                          |               | Gene2 of predicted pair |               |
| Systematic Name                                  | Standard Name | Systematic Name         | Standard Name |
| YFR010W                                          | UBP6          | YDL083C                 | RPS16B        |
| YDR245W                                          | MNN10         | YJL124C                 | LSM1          |
| YGL147C                                          | RPL9A         | YGL246C                 | RAI1          |
| YLR386W                                          | VAC14         | YDR130C                 | FIN1          |
| YGR072W                                          | UPF3          | YPR051W                 | MAK3          |
| YPR018W                                          | RLF2          | YFL023W                 | BUD27         |
| YGL153W                                          | PEX14         | YBL072C                 | RPS8A         |
| YER114C                                          | BOI2          | YMR055C                 | BUB2          |
| YLR292C                                          | SEC72         | YPR046W                 | MCM16         |
| YHR205W                                          | SCH9          | YHR012W                 | VPS29         |
| YNL242W                                          | ATG2          | YDL149W                 | ATG9          |
| YOR337W                                          | TEA1          | YGL033W                 | HOP2          |
| YFL026W                                          | STE2          | YDR264C                 | AKR1          |
| YJR024C                                          | MDE1          | YER115C                 | SPR6          |
| YEL009C                                          | GCN4          | YNL107W                 | YAF9          |
| YKL025C                                          | PAN3          | YJL154C                 | VPS35         |
| YOL145C                                          | CTR9          | YGR135W                 | PRE9          |
| YHR060W                                          | VMA22         | YLR370C                 | ARC18         |
| YPL161C                                          | BEM4          | YPL089C                 | RLM1          |
| YMR284W                                          | YKU70         | YDR076W                 | RAD55         |
| YDL184C                                          | RPL41A        | YPL137C                 | GIP3          |
| YML001W                                          | YPT7          | YOR035C                 | SHE4          |
| YDR129C                                          | SAC6          | YOL081W                 | IRA2          |
| YBR239C                                          | YBR239C       | YPR119W                 | CLB2          |
| YDR293C                                          | SSD1          | YOR132W                 | VPS17         |
| YOR332W                                          | VMA4          | YEL051W                 | VMA8          |
| YDR174W                                          | HMO1          | YGR270W                 | YTA7          |
| YOR195W                                          | SLK19         | YOL054W                 | PSH1          |
| YGL174W                                          | BUD13         | YPL057C                 | SUR1          |

| Predictions at threshold level 0.75 continued... |               |                         |               |
|--------------------------------------------------|---------------|-------------------------|---------------|
| Gene1 of predicted pair                          |               | Gene2 of predicted pair |               |
| Systematic Name                                  | Standard Name | Systematic Name         | Standard Name |
| YBL021C                                          | HAP3          | YJL183W                 | MNN11         |
| YNR052C                                          | POP2          | YBR107C                 | IML3          |
| YLR135W                                          | SLX4          | YHR077C                 | NMD2          |
| YLR447C                                          | VMA6          | YKL048C                 | ELM1          |
| YDR439W                                          | LRS4          | YBR200W                 | BEM1          |
| YDR225W                                          | HTA1          | YGL066W                 | SGF73         |
| YNL106C                                          | INP52         | YGR184C                 | UBR1          |
| YOR023C                                          | AHC1          | YBR171W                 | SEC66         |
| YMR153W                                          | NUP53         | YBR280C                 | SAF1          |
| YOR080W                                          | DIA2          | YPR046W                 | MCM16         |
| YPR051W                                          | MAK3          | YNL166C                 | BNI5          |
| YLR453C                                          | RIF2          | YCL073C                 | YCL073C       |
| YIL159W                                          | BNR1          | YKL126W                 | YPK1          |
| YGL025C                                          | PGD1          | YHR060W                 | VMA22         |
| YBR228W                                          | SLX1          | YDR207C                 | UME6          |
| YDR137W                                          | RGP1          | YDR318W                 | MCM21         |
| YDR108W                                          | GSG1          | YDL077C                 | VAM6          |
| YMR224C                                          | MRE11         | YMR198W                 | CIK1          |
| YGL153W                                          | PEX14         | YDR440W                 | DOT1          |
| YLR337C                                          | VRP1          | YNL215W                 | IES2          |
| YIR009W                                          | MSL1          | YER096W                 | SHC1          |
| YBR173C                                          | UMP1          | YDR477W                 | SNF1          |
| YDL101C                                          | DUN1          | YMR284W                 | YKU70         |
| YCR077C                                          | PAT1          | YDR440W                 | DOT1          |
| YLR399C                                          | BDF1          | YBR289W                 | SNF5          |
| YML115C                                          | VAN1          | YGL223C                 | COG1          |
| YLR320W                                          | MMS22         | YLR371W                 | ROM2          |
| YBR200W                                          | BEM1          | YGR188C                 | BUB1          |
| YNL058C                                          | YNL058C       | YMR133W                 | REC114        |

| Predictions at threshold level 0.75 continued... |               |                         |               |
|--------------------------------------------------|---------------|-------------------------|---------------|
| Gene1 of predicted pair                          |               | Gene2 of predicted pair |               |
| Systematic Name                                  | Standard Name | Systematic Name         | Standard Name |
| YNL058C                                          | YNL058C       | YPL037C                 | EGD1          |
| YCR081W                                          | SRB8          | YOR008C                 | SLG1          |
| YLR381W                                          | CTF3          | YBR114W                 | RAD16         |
| YDR245W                                          | MNN10         | YFR036W                 | CDC26         |
| YNL054W                                          | VAC7          | YCR086W                 | CSM1          |
| YHR111W                                          | UBA4          | YDR289C                 | RTT103        |
| YLR119W                                          | SRN2          | YER162C                 | RAD4          |
| YDR004W                                          | RAD57         | YDR318W                 | MCM21         |
| YPR017C                                          | DSS4          | YJR060W                 | CBF1          |
| YBR171W                                          | SEC66         | YMR152W                 | YIM1          |
| YOR127W                                          | RGA1          | YJR033C                 | RAV1          |
| YML016C                                          | PPZ1          | YLR399C                 | BDF1          |
| YPR084W                                          | YPR084W       | YPR051W                 | MAK3          |
| YER122C                                          | GLO3          | YOL108C                 | INO4          |
| YOR109W                                          | INP53         | YDL226C                 | GCS1          |
| YKL139W                                          | CTK1          | YCR053W                 | THR4          |
| YLR360W                                          | VPS38         | YBR107C                 | IML3          |
| YNL238W                                          | KEX2          | YLR180W                 | SAM1          |
| YPR017C                                          | DSS4          | YNL044W                 | YIP3          |
| YDR389W                                          | SAC7          | YOR109W                 | INP53         |
| YBR108W                                          | YBR108W       | YGR270W                 | YTA7          |
| YIL148W                                          | RPL40A        | YER110C                 | KAP123        |
| YPL125W                                          | KAP120        | YER110C                 | KAP123        |
| YBR107C                                          | IML3          | YNL225C                 | CNM67         |
| YDL020C                                          | RPN4          | YDR144C                 | MKC7          |
| YBR195C                                          | MSI1          | YDR310C                 | SUM1          |
| YDL184C                                          | RPL41A        | YOR327C                 | SNC2          |
| YLR094C                                          | GIS3          | YNL238W                 | KEX2          |
| YBR171W                                          | SEC66         | YPL234C                 | TFP3          |

| Predictions at threshold level 0.75 continued... |               |                         |               |
|--------------------------------------------------|---------------|-------------------------|---------------|
| Gene1 of predicted pair                          |               | Gene2 of predicted pair |               |
| Systematic Name                                  | Standard Name | Systematic Name         | Standard Name |
| YPL137C                                          | GIP3          | YDR310C                 | SUM1          |
| YHR171W                                          | ATG7          | YBL078C                 | ATG8          |
| YHR060W                                          | VMA22         | YJL095W                 | BCK1          |
| YMR199W                                          | CLN1          | YDL059C                 | RAD59         |
| YOL111C                                          | MDY2          | YNL238W                 | KEX2          |
| YFL047W                                          | RGD2          | YPL256C                 | CLN2          |
| YOR290C                                          | SNF2          | YDR358W                 | GGA1          |
| YBR010W                                          | HHT1          | YBL002W                 | HTB2          |
| YLR216C                                          | CPR6          | YGL252C                 | RTG2          |
| YMR039C                                          | SUB1          | YOR368W                 | RAD17         |
| YJL124C                                          | LSM1          | YOR014W                 | RTS1          |
| YER044C                                          | ERG28         | YGL124C                 | MON1          |
| YJR140C                                          | HIR3          | YDR335W                 | MSN5          |
| YMR246W                                          | FAA4          | YKR046C                 | PET10         |
| YEL065W                                          | SIT1          | YLR370C                 | ARC18         |
| YOR106W                                          | VAM3          | YNL107W                 | YAF9          |
| YKL101W                                          | HSL1          | YOR014W                 | RTS1          |
| YMR095C                                          | SNO1          | YER116C                 | SLX8          |
| YKL007W                                          | CAP1          | YMR109W                 | MYO5          |
| YLR315W                                          | NKP2          | YLR254C                 | NDL1          |
| YPL161C                                          | BEM4          | YER139C                 | YER139C       |
| YBR173C                                          | UMP1          | YKL116C                 | PRR1          |
| YPL057C                                          | SUR1          | YLR150W                 | STM1          |
| YGR178C                                          | PBP1          | YGL094C                 | PAN2          |
| YMR017W                                          | SPO20         | YAL030W                 | SNC1          |
| YPR030W                                          | CSR2          | YLR398C                 | SKI2          |
| YCR034W                                          | FEN1          | YOR368W                 | RAD17         |
| YBR158W                                          | AMN1          | YDL138W                 | RGT2          |
| YLR234W                                          | TOP3          | YJL187C                 | SWE1          |

| Predictions at threshold level 0.75 continued... |               |                         |               |
|--------------------------------------------------|---------------|-------------------------|---------------|
| Gene1 of predicted pair                          |               | Gene2 of predicted pair |               |
| Systematic Name                                  | Standard Name | Systematic Name         | Standard Name |
| YDR318W                                          | MCM21         | YNL147W                 | LSM7          |
| YLL007C                                          | YLL007C       | YNL288W                 | CAF40         |
| YKR101W                                          | SIR1          | YDR227W                 | SIR4          |
| YCR065W                                          | HCM1          | YKL048C                 | ELM1          |
| YNL236W                                          | SIN4          | YMR038C                 | CCS1          |
| YPL256C                                          | CLN2          | YML057W                 | CMP2          |
| YOR023C                                          | AHC1          | YJL190C                 | RPS22A        |
| YEL053C                                          | MAK10         | YDR207C                 | UME6          |
| YLR337C                                          | VRP1          | YMR224C                 | MRE11         |
| YDR484W                                          | VPS52         | YDL223C                 | HBT1          |
| YDL101C                                          | DUN1          | YMR116C                 | ASC1          |
| YDR293C                                          | SSD1          | YJR040W                 | GEF1          |
| YPR017C                                          | DSS4          | YMR054W                 | STV1          |
| YOR080W                                          | DIA2          | YDR207C                 | UME6          |
| YGL033W                                          | HOP2          | YKR099W                 | BAS1          |
| YMR091C                                          | NPL6          | YGR275W                 | RTT102        |
| YKL068W                                          | NUP100        | YML057W                 | CMP2          |
| YJL124C                                          | LSM1          | YDR422C                 | SIP1          |
| YOR083W                                          | WHI5          | YLR381W                 | CTF3          |
| YKR099W                                          | BAS1          | YPL037C                 | EGD1          |
| YDR225W                                          | HTA1          | YDL042C                 | SIR2          |
| YPR173C                                          | VPS4          | YDR486C                 | VPS60         |
| YDR254W                                          | CHL4          | YHR111W                 | UBA4          |
| YJR140C                                          | HIR3          | YBR278W                 | DPB3          |
| YOR132W                                          | VPS17         | YPL105C                 | YPL105C       |
| YGL215W                                          | CLG1          | YAL055W                 | PEX22         |
| YBR108W                                          | YBR108W       | YHR039C-A               | VMA10         |
| YDL116W                                          | NUP84         | YLR352W                 | YLR352W       |
| YBR260C                                          | RGD1          | YPL256C                 | CLN2          |

| Predictions at threshold level 0.75 continued... |               |                         |               |
|--------------------------------------------------|---------------|-------------------------|---------------|
| Gene1 of predicted pair                          |               | Gene2 of predicted pair |               |
| Systematic Name                                  | Standard Name | Systematic Name         | Standard Name |
| YML058W                                          | SML1          | YOR368W                 | RAD17         |
| YGR108W                                          | CLB1          | YOR127W                 | RGA1          |
| YOR127W                                          | RGA1          | YDR507C                 | GIN4          |
| YCR086W                                          | CSM1          | YDR318W                 | MCM21         |
| YFL013C                                          | IES1          | YBR215W                 | HPC2          |
| YPL024W                                          | RMI1          | YMR167W                 | MLH1          |
| YGR014W                                          | MSB2          | YER118C                 | SHO1          |
| YLR337C                                          | VRP1          | YIL008W                 | URM1          |
| YNL238W                                          | KEX2          | YML071C                 | COG8          |
| YLL039C                                          | UBI4          | YJL095W                 | BCK1          |
| YGR054W                                          | YGR054W       | YCR086W                 | CSM1          |
| YAL024C                                          | LTE1          | YLR079W                 | SIC1          |
| YMR153W                                          | NUP53         | YDR484W                 | VPS52         |
| YNL041C                                          | COG6          | YJL183W                 | MNN11         |
| YBR290W                                          | BSD2          | YMR125W                 | STO1          |
| YGR054W                                          | YGR054W       | YDR318W                 | MCM21         |
| YNL288W                                          | CAF40         | YJL095W                 | BCK1          |
| YOR080W                                          | DIA2          | YGL003C                 | CDH1          |
| YFR032C-A                                        | RPL29         | YOR275C                 | RIM20         |
| YOR275C                                          | RIM20         | YLR425W                 | TUS1          |
| YMR198W                                          | CIK1          | YGL115W                 | SNF4          |
| YHR081W                                          | LRP1          | YNL076W                 | MKS1          |
| YOR080W                                          | DIA2          | YAL002W                 | VPS8          |
| YDR108W                                          | GSG1          | YPL195W                 | APL5          |
| YEL053C                                          | MAK10         | YEL060C                 | PRB1          |
| YMR172W                                          | HOT1          | YDL155W                 | CLB3          |
| YNL094W                                          | APP1          | YMR253C                 | YMR253C       |
| YML016C                                          | PPZ1          | YHR012W                 | VPS29         |
| YDR083W                                          | RRP8          | YHR081W                 | LRP1          |

| Predictions at threshold level 0.75 continued... |               |                         |               |
|--------------------------------------------------|---------------|-------------------------|---------------|
| Gene1 of predicted pair                          |               | Gene2 of predicted pair |               |
| Systematic Name                                  | Standard Name | Systematic Name         | Standard Name |
| YHR012W                                          | VPS29         | YMR054W                 | STV1          |
| YGL200C                                          | EMP24         | YBL101C                 | ECM21         |
| YGL054C                                          | ERV14         | YOL018C                 | TLG2          |
| YBR200W                                          | BEM1          | YBR082C                 | UBC4          |
| YPL213W                                          | LEA1          | YJL095W                 | BCK1          |
| YML038C                                          | YMD8          | YDR319C                 | YDR319C       |
| YMR142C                                          | RPL13B        | YLR320W                 | MMS22         |
| YLR320W                                          | MMS22         | YGR135W                 | PRE9          |
| YPL161C                                          | BEM4          | YPL018W                 | CTF19         |
| YJL006C                                          | CTK2          | YDR440W                 | DOT1          |
| YDR378C                                          | LSM6          | YPL018W                 | CTF19         |
| YDR293C                                          | SSD1          | YGR188C                 | BUB1          |
| YLR337C                                          | VRP1          | YGL151W                 | NUT1          |
| YMR153W                                          | NUP53         | YMR164C                 | MSS11         |
| YDR318W                                          | MCM21         | YAL002W                 | VPS8          |
| YDR225W                                          | HTA1          | YPR046W                 | MCM16         |
| YGL237C                                          | HAP2          | YDR144C                 | MKC7          |
| YIL076W                                          | SEC28         | YJR032W                 | CPR7          |
| YLR447C                                          | VMA6          | YDL155W                 | CLB3          |
| YGL223C                                          | COG1          | YOL108C                 | INO4          |
| YBR173C                                          | UMP1          | YNL041C                 | COG6          |
| YHR200W                                          | RPN10         | YER040W                 | GLN3          |
| YLR441C                                          | RPS1A         | YPR046W                 | MCM16         |
| YER122C                                          | GLO3          | YDR310C                 | SUM1          |
| YDR484W                                          | VPS52         | YHR081W                 | LRP1          |
| YDL127W                                          | PCL2          | YDR146C                 | SWI5          |
| YOR213C                                          | SAS5          | YOR308C                 | SNU66         |
| YBL103C                                          | RTG3          | YGL003C                 | CDH1          |
| YMR133W                                          | REC114        | YER162C                 | RAD4          |



| Predictions at threshold level 0.75 continued... |               |                         |               |
|--------------------------------------------------|---------------|-------------------------|---------------|
| Gene1 of predicted pair                          |               | Gene2 of predicted pair |               |
| Systematic Name                                  | Standard Name | Systematic Name         | Standard Name |
| YJL176C                                          | SWI3          | YGL135W                 | RPL1B         |
| YPR036W                                          | VMA13         | YHR200W                 | RPN10         |
| YMR039C                                          | SUB1          | YPL001W                 | HAT1          |
| YCR086W                                          | CSM1          | YBR114W                 | RAD16         |
| YIL076W                                          | SEC28         | YOR035C                 | SHE4          |
| YLR150W                                          | STM1          | YGR188C                 | BUB1          |
| YLR337C                                          | VRP1          | YOR008C                 | SLG1          |
| YLR360W                                          | VPS38         | YEL036C                 | ANP1          |
| YBR030W                                          | YBR030W       | YEL053C                 | MAK10         |
| YBR042C                                          | CST26         | YKL041W                 | VPS24         |
| YAL024C                                          | LTE1          | YAR014C                 | BUD14         |
| YFL013C                                          | IES1          | YEL013W                 | VAC8          |
| YDR129C                                          | SAC6          | YDR484W                 | VPS52         |
| YHR111W                                          | UBA4          | YGR188C                 | BUB1          |
| YCL037C                                          | SRO9          | YLR315W                 | NKP2          |
| YKL048C                                          | ELM1          | YPL195W                 | APL5          |
| YNL068C                                          | FKH2          | YBR200W                 | BEM1          |
| YDL077C                                          | VAM6          | YEL060C                 | PRB1          |
| YDL116W                                          | NUP84         | YDL226C                 | GCS1          |
| YCL001W                                          | RER1          | YDR153C                 | ENT5          |
| YBR107C                                          | IML3          | YIL103W                 | DPH1          |
| YFL026W                                          | STE2          | YLR206W                 | ENT2          |
| YLR234W                                          | TOP3          | YGR081C                 | SLX9          |
| YJL154C                                          | VPS35         | YGL095C                 | VPS45         |
| YLR043C                                          | TRX1          | YBR158W                 | AMN1          |
| YLR090W                                          | XDJ1          | YJR032W                 | CPR7          |
| YMR202W                                          | ERG2          | YDR080W                 | VPS41         |
| YOL126C                                          | MDH2          | YGL016W                 | KAP122        |
| YDR320C                                          | SWA2          | YAL002W                 | VPS8          |

| Predictions at threshold level 0.75 continued... |               |                         |               |
|--------------------------------------------------|---------------|-------------------------|---------------|
| Gene1 of predicted pair                          |               | Gene2 of predicted pair |               |
| Systematic Name                                  | Standard Name | Systematic Name         | Standard Name |
| YIL103W                                          | DPH1          | YDR318W                 | MCM21         |
| YOL111C                                          | MDY2          | YDR358W                 | GGA1          |
| YBR215W                                          | HPC2          | YGR188C                 | BUB1          |
| YKR001C                                          | VPS1          | YML071C                 | COG8          |
| YDL116W                                          | NUP84         | YOL091W                 | SPO21         |
| YGR249W                                          | MGA1          | YDR310C                 | SUM1          |
| YMR202W                                          | ERG2          | YKR048C                 | NAP1          |
| YGR249W                                          | MGA1          | YER116C                 | SLX8          |
| YDL077C                                          | VAM6          | YNL051W                 | COG5          |
| YOR290C                                          | SNF2          | YDR137W                 | RGP1          |
| YLR320W                                          | MMS22         | YDR358W                 | GGA1          |
| YMR068W                                          | AVO2          | YPL180W                 | TCO89         |
| YPR046W                                          | MCM16         | YLR254C                 | NDL1          |
| YFR031C-A                                        | RPL2A         | YKL139W                 | CTK1          |
| YBR107C                                          | IML3          | YLR410W                 | VIP1          |
| YER139C                                          | YER139C       | YNL107W                 | YAF9          |
| YLR386W                                          | VAC14         | YJL095W                 | BCK1          |
| YFR031C-A                                        | RPL2A         | YMR054W                 | STV1          |
| YIL053W                                          | RHR2          | YJL172W                 | CPS1          |
| YML103C                                          | NUP188        | YMR055C                 | BUB2          |
| YIL156W                                          | UBP7          | YGR059W                 | SPR3          |
| YBR127C                                          | VMA2          | YJL029C                 | VPS53         |
| YLR370C                                          | ARC18         | YOL081W                 | IRA2          |
| YKL048C                                          | ELM1          | YGL031C                 | RPL24A        |
| YLR095C                                          | IOC2          | YJR084W                 | CSN12         |
| YOR023C                                          | AHC1          | YKL048C                 | ELM1          |
| YMR172W                                          | HOT1          | YDR144C                 | MKC7          |
| YHR134W                                          | WSS1          | YJR032W                 | CPR7          |
| YPR051W                                          | MAK3          | YML001W                 | YPT7          |

| Predictions at threshold level 0.75 continued... |               |                         |               |
|--------------------------------------------------|---------------|-------------------------|---------------|
| Gene1 of predicted pair                          |               | Gene2 of predicted pair |               |
| Systematic Name                                  | Standard Name | Systematic Name         | Standard Name |
| YFR010W                                          | UBP6          | YOR038C                 | HIR2          |
| YLR320W                                          | MMS22         | YHR081W                 | LRP1          |
| YNL058C                                          | YNL058C       | YHR200W                 | RPN10         |
| YKR020W                                          | VPS51         | YKR014C                 | YPT52         |
| YJL138C                                          | TIF2          | YGL250W                 | RMR1          |
| YDR439W                                          | LRS4          | YLR381W                 | CTF3          |
| YHR178W                                          | STB5          | YJR090C                 | GRR1          |
| YGR249W                                          | MGA1          | YJR084W                 | CSN12         |
| YEL065W                                          | SIT1          | YDL192W                 | ARF1          |
| YGR054W                                          | YGR054W       | YDR144C                 | MKC7          |
| YFR036W                                          | CDC26         | YPR046W                 | MCM16         |
| YJR024C                                          | MDE1          | YBL079W                 | NUP170        |
| YKL117W                                          | SBA1          | YJR032W                 | CPR7          |
| YDR129C                                          | SAC6          | YBL047C                 | EDE1          |
| YDR443C                                          | SSN2          | YJL095W                 | BCK1          |
| YOR083W                                          | WHI5          | YNL236W                 | SIN4          |
| YPL037C                                          | EGD1          | YPR032W                 | SRO7          |
| YOR071C                                          | THI71         | YFL044C                 | OTU1          |
| YNL094W                                          | APP1          | YGR268C                 | HUA1          |
| YFR024C-A                                        | LSB3          | YCR088W                 | ABP1          |
| YHR060W                                          | VMA22         | YKR035W-A               | DID2          |
| YMR224C                                          | MRE11         | YNL215W                 | IES2          |
| YDR146C                                          | SWI5          | YPL001W                 | HAT1          |
| YLR079W                                          | SIC1          | YDR477W                 | SNF1          |
| YOR290C                                          | SNF2          | YPL037C                 | EGD1          |
| YGL078C                                          | DBP3          | YGR283C                 | YGR283C       |
| YMR116C                                          | ASC1          | YMR284W                 | YKU70         |
| YKL213C                                          | DOA1          | YKL160W                 | ELF1          |
| YOR001W                                          | RRP6          | YIR005W                 | IST3          |

| Predictions at threshold level 0.75 continued... |               |                         |               |
|--------------------------------------------------|---------------|-------------------------|---------------|
| Gene1 of predicted pair                          |               | Gene2 of predicted pair |               |
| Systematic Name                                  | Standard Name | Systematic Name         | Standard Name |
| YER144C                                          | UBP5          | YPL137C                 | GIP3          |
| YPR046W                                          | MCM16         | YMR230W                 | RPS10B        |
| YBR200W                                          | BEM1          | YKL126W                 | YPK1          |
| YBR215W                                          | HPC2          | YHR039C-A               | VMA10         |
| YDR439W                                          | LRS4          | YLR399C                 | BDF1          |
| YOR023C                                          | AHC1          | YGL124C                 | MON1          |
| YFR031C-A                                        | RPL2A         | YDR153C                 | ENT5          |
| YNL201C                                          | PSY2          | YHR115C                 | DMA1          |
| YHR152W                                          | SPO12         | YGL031C                 | RPL24A        |
| YOR001W                                          | RRP6          | YDR200C                 | VPS64         |
| YAL024C                                          | LTE1          | YBL008W                 | HIR1          |
| YML102W                                          | CAC2          | YKL160W                 | ELF1          |
| YBR173C                                          | UMP1          | YDR261C                 | EXG2          |
| YOL126C                                          | MDH2          | YPL178W                 | CBC2          |
| YOR132W                                          | VPS17         | YMR055C                 | BUB2          |
| YNL166C                                          | BNI5          | YNL107W                 | YAF9          |
| YDL059C                                          | RAD59         | YBR073W                 | RDH54         |
| YJR135C                                          | MCM22         | YGL253W                 | HXK2          |
| YDR174W                                          | HMO1          | YOL081W                 | IRA2          |
| YMR216C                                          | SKY1          | YEL051W                 | VMA8          |
| YLR370C                                          | ARC18         | YEL036C                 | ANP1          |
| YFR024C-A                                        | LSB3          | YJL151C                 | SNA3          |
| YGL163C                                          | RAD54         | YDL155W                 | CLB3          |
| YML016C                                          | PPZ1          | YGL163C                 | RAD54         |
| YCR020C-A                                        | MAK31         | YDR080W                 | VPS41         |
| YGR019W                                          | UGA1          | YJL095W                 | BCK1          |
| YMR039C                                          | SUB1          | YOR043W                 | WHI2          |
| YLR079W                                          | SIC1          | YDR439W                 | LRS4          |
| YDL185W                                          | TFP1          | YPL234C                 | TFP3          |

| Predictions at threshold level 0.75 continued... |               |                         |               |
|--------------------------------------------------|---------------|-------------------------|---------------|
| Gene1 of predicted pair                          |               | Gene2 of predicted pair |               |
| Systematic Name                                  | Standard Name | Systematic Name         | Standard Name |
| YPL024W                                          | RMI1          | YGR188C                 | BUB1          |
| YOR008C                                          | SLG1          | YMR311C                 | GLC8          |
| YDR129C                                          | SAC6          | YDL192W                 | ARF1          |
| YLR386W                                          | VAC14         | YLR315W                 | NKP2          |
| YPL024W                                          | RMI1          | YML062C                 | MFT1          |
| YNL293W                                          | MSB3          | YGL198W                 | YIP4          |
| YBR131W                                          | CCZ1          | YLR447C                 | VMA6          |
| YIL034C                                          | CAP2          | YGL124C                 | MON1          |
| YPL115C                                          | BEM3          | YGR054W                 | YGR054W       |
| YEL044W                                          | IES6          | YKL041W                 | VPS24         |
| YFL023W                                          | BUD27         | YDR310C                 | SUM1          |
| YLR381W                                          | CTF3          | YGR184C                 | UBR1          |
| YHR012W                                          | VPS29         | YMR022W                 | UBC7          |
| YLR079W                                          | SIC1          | YOR140W                 | SFL1          |
| YOR141C                                          | ARP8          | YHR115C                 | DMA1          |
| YDR440W                                          | DOT1          | YAL002W                 | VPS8          |
| YGL038C                                          | OCH1          | YJL187C                 | SWE1          |
| YOR132W                                          | VPS17         | YCL037C                 | SRO9          |
| YDR261C                                          | EXG2          | YOR035C                 | SHE4          |
| YJR135C                                          | MCM22         | YGR188C                 | BUB1          |
| YKL160W                                          | ELF1          | YDR289C                 | RTT103        |
| YDR477W                                          | SNF1          | YJR032W                 | CPR7          |
| YNL201C                                          | PSY2          | YMR224C                 | MRE11         |
| YJL006C                                          | CTK2          | YJR005W                 | APL1          |
| YDL116W                                          | NUP84         | YOL054W                 | PSH1          |
| YOR080W                                          | DIA2          | YPL253C                 | VIK1          |
| YER107C                                          | GLE2          | YLR085C                 | ARP6          |
| YKL116C                                          | PRR1          | YLR452C                 | SST2          |
| YDL184C                                          | RPL41A        | YER162C                 | RAD4          |

| Predictions at threshold level 0.75 continued... |               |                         |               |
|--------------------------------------------------|---------------|-------------------------|---------------|
| Gene1 of predicted pair                          |               | Gene2 of predicted pair |               |
| Systematic Name                                  | Standard Name | Systematic Name         | Standard Name |
| YDL083C                                          | RPS16B        | YNL076W                 | MKS1          |
| YOR195W                                          | SLK19         | YIL036W                 | CST6          |
| YDL020C                                          | RPN4          | YAR014C                 | BUD14         |
| YPR017C                                          | DSS4          | YNL069C                 | RPL16B        |
| YDL006W                                          | PTC1          | YMR089C                 | YTA12         |
| YPL057C                                          | SUR1          | YNR072W                 | HXT17         |
| YPL161C                                          | BEM4          | YKR048C                 | NAP1          |
| YHR119W                                          | SET1          | YGL058W                 | RAD6          |
| YNL289W                                          | PCL1          | YLR425W                 | TUS1          |
| YNL238W                                          | KEX2          | YJL004C                 | SYS1          |
| YNL054W                                          | VAC7          | YML112W                 | CTK3          |
| YDR264C                                          | AKR1          | YJL095W                 | BCK1          |
| YMR224C                                          | MRE11         | YLR357W                 | RSC2          |
| YJL036W                                          | SNX4          | YJR040W                 | GEF1          |
| YGL147C                                          | RPL9A         | YPR030W                 | CSR2          |
| YGL212W                                          | VAM7          | YPL234C                 | TFP3          |
| YFL023W                                          | BUD27         | YCR053W                 | THR4          |
| YJR032W                                          | CPR7          | YEL056W                 | HAT2          |
| YMR055C                                          | BUB2          | YIR005W                 | IST3          |
| YKL139W                                          | CTK1          | YGL174W                 | BUD13         |
| YER110C                                          | KAP123        | YDR318W                 | MCM21         |
| YGR252W                                          | GCN5          | YPL248C                 | GAL4          |
| YHR073W                                          | OSH3          | YCR024C-A               | PMP1          |
| YPL022W                                          | RAD1          | YPR120C                 | CLB5          |
| YMR055C                                          | BUB2          | YLR032W                 | RAD5          |
| YBR010W                                          | HHT1          | YOR064C                 | YNG1          |
| YCR066W                                          | RAD18         | YDL077C                 | VAM6          |
| YLR452C                                          | SST2          | YPR030W                 | CSR2          |
| YFR031C-A                                        | RPL2A         | YDR358W                 | GGA1          |

| Predictions at threshold level 0.75 continued... |               |                         |               |
|--------------------------------------------------|---------------|-------------------------|---------------|
| Gene1 of predicted pair                          |               | Gene2 of predicted pair |               |
| Systematic Name                                  | Standard Name | Systematic Name         | Standard Name |
| YML115C                                          | VAN1          | YKL041W                 | VPS24         |
| YER139C                                          | YER139C       | YBL025W                 | RRN10         |
| YGR072W                                          | UPF3          | YMR004W                 | MVP1          |
| YMR224C                                          | MRE11         | YBL058W                 | SHP1          |
| YPL024W                                          | RMI1          | YHR178W                 | STB5          |
| YJL172W                                          | CPS1          | YHR039C-A               | VMA10         |
| YDR261C                                          | EXG2          | YPR030W                 | CSR2          |
| YGR019W                                          | UGA1          | YJL183W                 | MNN11         |
| YNL069C                                          | RPL16B        | YPL037C                 | EGD1          |
| YER122C                                          | GLO3          | YLR350W                 | ORM2          |
| YNR052C                                          | POP2          | YJR060W                 | CBF1          |
| YLR288C                                          | MEC3          | YML102W                 | CAC2          |
| YDR395W                                          | SXM1          | YDL116W                 | NUP84         |
| YOR195W                                          | SLK19         | YOR275C                 | RIM20         |
| YNL201C                                          | PSY2          | YNL116W                 | DMA2          |
| YPL158C                                          | YPL158C       | YPL256C                 | CLN2          |
| YJR140C                                          | HIR3          | YKL101W                 | HSL1          |
| YAL024C                                          | LTE1          | YKL101W                 | HSL1          |
| YPR084W                                          | YPR084W       | YDR378C                 | LSM6          |
| YBL102W                                          | SFT2          | YML038C                 | YMD8          |
| YHR178W                                          | STB5          | YML097C                 | VPS9          |
| YOR127W                                          | RGA1          | YGL038C                 | OCH1          |
| YBR200W                                          | BEM1          | YGL252C                 | RTG2          |
| YLR109W                                          | AHP1          | YML028W                 | TSA1          |
| YLR447C                                          | VMA6          | YDR254W                 | CHL4          |
| YKL139W                                          | CTK1          | YJL183W                 | MNN11         |
| YGL223C                                          | COG1          | YER122C                 | GLO3          |
| YOR337W                                          | TEA1          | YGR249W                 | MGA1          |
| YNL058C                                          | YNL058C       | YPL137C                 | GIP3          |

| Predictions at threshold level 0.75 continued... |               |                         |               |
|--------------------------------------------------|---------------|-------------------------|---------------|
| Gene1 of predicted pair                          |               | Gene2 of predicted pair |               |
| Systematic Name                                  | Standard Name | Systematic Name         | Standard Name |
| YGL190C                                          | CDC55         | YEL003W                 | GIM4          |
| YDL020C                                          | RPN4          | YJL190C                 | RPS22A        |
| YDL135C                                          | RDI1          | YIL007C                 | NAS2          |
| YIL036W                                          | CST6          | YDR335W                 | MSN5          |
| YNL106C                                          | INP52         | YCL037C                 | SRO9          |
| YDL006W                                          | PTC1          | YLR425W                 | TUS1          |
| YFR010W                                          | UBP6          | YOR243C                 | PUS7          |
| YPL115C                                          | BEM3          | YJL157C                 | FAR1          |
| YDR004W                                          | RAD57         | YBR036C                 | CSG2          |
| YBL025W                                          | RRN10         | YKL041W                 | VPS24         |
| YLR191W                                          | PEX13         | YPR119W                 | CLB2          |
| YKL139W                                          | CTK1          | YMR230W                 | RPS10B        |
| YLR090W                                          | XDJ1          | YAL024C                 | LTE1          |
| YPL106C                                          | SSE1          | YPR119W                 | CLB2          |
| YPR046W                                          | MCM16         | YKL114C                 | APN1          |
| YOR195W                                          | SLK19         | YBR215W                 | HPC2          |
| YLR119W                                          | SRN2          | YER116C                 | SLX8          |
| YBL058W                                          | SHP1          | YIL076W                 | SEC28         |
| YJL053W                                          | PEP8          | YDR153C                 | ENT5          |
| YNL054W                                          | VAC7          | YPR046W                 | MCM16         |
| YGL178W                                          | MPT5          | YGL058W                 | RAD6          |
| YKL126W                                          | YPK1          | YER162C                 | RAD4          |
| YEL065W                                          | SIT1          | YLR094C                 | GIS3          |
| YLR386W                                          | VAC14         | YPL256C                 | CLN2          |
| YDL101C                                          | DUN1          | YER089C                 | PTC2          |
| YKR061W                                          | KTR2          | YNL116W                 | DMA2          |
| YNL201C                                          | PSY2          | YMR055C                 | BUB2          |
| YFR031C-A                                        | RPL2A         | YCR066W                 | RAD18         |
| YPR051W                                          | MAK3          | YPL120W                 | VPS30         |



| Predictions at threshold level 0.75 continued... |               |                         |               |
|--------------------------------------------------|---------------|-------------------------|---------------|
| Gene1 of predicted pair                          |               | Gene2 of predicted pair |               |
| Systematic Name                                  | Standard Name | Systematic Name         | Standard Name |
| YGR275W                                          | RTT102        | YHL025W                 | SNF6          |
| YPR084W                                          | YPR084W       | YOR001W                 | RRP6          |
| YGL078C                                          | DBP3          | YFR036W                 | CDC26         |
| YNL307C                                          | MCK1          | YDL083C                 | RPS16B        |
| YER116C                                          | SLX8          | YOR035C                 | SHE4          |
| YMR109W                                          | MYO5          | YIL008W                 | URM1          |
| YGL025C                                          | PGD1          | YER044C                 | ERG28         |
| YDL006W                                          | PTC1          | YDR207C                 | UME6          |
| YKR001C                                          | VPS1          | YLR309C                 | IMH1          |
| YGL250W                                          | RMR1          | YCR031C                 | RPS14A        |
| YLR170C                                          | APS1          | YOL062C                 | APM4          |
| YDR004W                                          | RAD57         | YBR173C                 | UMP1          |
| YGL147C                                          | RPL9A         | YGL115W                 | SNF4          |
| YBR171W                                          | SEC66         | YDL077C                 | VAM6          |
| YIL053W                                          | RHR2          | YGL124C                 | MON1          |
| YML038C                                          | YMD8          | YOL018C                 | TLG2          |
| YDL013W                                          | SLX5          | YML028W                 | TSA1          |
| YKL139W                                          | CTK1          | YML016C                 | PPZ1          |
| YER044C                                          | ERG28         | YMR152W                 | YIM1          |
| YGL223C                                          | COG1          | YNL238W                 | KEX2          |
| YHR039C-A                                        | VMA10         | YKL119C                 | VPH2          |
| YKL116C                                          | PRR1          | YDL223C                 | HBT1          |
| YDL113C                                          | ATG20         | YJL036W                 | SNX4          |
| YFR031C-A                                        | RPL2A         | YLR371W                 | ROM2          |
| YMR142C                                          | RPL13B        | YLR093C                 | NYV1          |
| YDR174W                                          | HMO1          | YKL048C                 | ELM1          |
| YIL103W                                          | DPH1          | YNL116W                 | DMA2          |
| YML038C                                          | YMD8          | YOR327C                 | SNC2          |
| YFR031C-A                                        | RPL2A         | YBR019C                 | GAL10         |

| Predictions at threshold level 0.75 continued... |               |                         |               |
|--------------------------------------------------|---------------|-------------------------|---------------|
| Gene1 of predicted pair                          |               | Gene2 of predicted pair |               |
| Systematic Name                                  | Standard Name | Systematic Name         | Standard Name |
| YPL129W                                          | TAF14         | YJL140W                 | RPB4          |
| YDL056W                                          | MBP1          | YPR119W                 | CLB2          |
| YHR178W                                          | STB5          | YJR135C                 | MCM22         |
| YMR153W                                          | NUP53         | YMR199W                 | CLN1          |
| YOR195W                                          | SLK19         | YJR135C                 | MCM22         |
| YDR137W                                          | RGP1          | YEL060C                 | PRB1          |
| YER044C                                          | ERG28         | YEL060C                 | PRB1          |
| YLR095C                                          | IOC2          | YKL048C                 | ELM1          |
| YBL079W                                          | NUP170        | YFL047W                 | RGD2          |
| YKR099W                                          | BAS1          | YDR261C                 | EXG2          |
| YER114C                                          | BOI2          | YPL161C                 | BEM4          |
| YDR076W                                          | RAD55         | YDR289C                 | RTT103        |
| YPR131C                                          | NAT3          | YJR035W                 | RAD26         |
| YEL065W                                          | SIT1          | YMR016C                 | SOK2          |
| YLR371W                                          | ROM2          | YPL256C                 | CLN2          |
| YHR156C                                          | LIN1          | YEL053C                 | MAK10         |
| YGR261C                                          | APL6          | YGL223C                 | COG1          |
| YPL042C                                          | SSN3          | YLR399C                 | BDF1          |
| YDR477W                                          | SNF1          | YOR140W                 | SFL1          |
| YHR111W                                          | UBA4          | YML112W                 | CTK3          |
| YDL083C                                          | RPS16B        | YCR053W                 | THR4          |
| YPL195W                                          | APL5          | YNL051W                 | COG5          |
| YPL137C                                          | GIP3          | YCR053W                 | THR4          |
| YMR153W                                          | NUP53         | YDL223C                 | HBT1          |
| YEL009C                                          | GCN4          | YBR289W                 | SNF5          |
| YDL160C                                          | DHH1          | YNL288W                 | CAF40         |
| YLR018C                                          | POM34         | YML103C                 | NUP188        |
| YLL039C                                          | UBI4          | YDL223C                 | HBT1          |
| YPR046W                                          | MCM16         | YGL253W                 | HXK2          |

| Predictions at threshold level 0.75 continued... |               |                         |               |
|--------------------------------------------------|---------------|-------------------------|---------------|
| Gene1 of predicted pair                          |               | Gene2 of predicted pair |               |
| Systematic Name                                  | Standard Name | Systematic Name         | Standard Name |
| YPR046W                                          | MCM16         | YGR188C                 | BUB1          |
| YML071C                                          | COG8          | YAL002W                 | VPS8          |
| YNL166C                                          | BNI5          | YCR086W                 | CSM1          |
| YDL161W                                          | ENT1          | YJR099W                 | YUH1          |
| YPL161C                                          | BEM4          | YOL121C                 | RPS19A        |
| YNL215W                                          | IES2          | YAR014C                 | BUD14         |
| YPL024W                                          | RMI1          | YJL095W                 | BCK1          |
| YDR383C                                          | NKP1          | YLR182W                 | SWI6          |
| YBR217W                                          | ATG12         | YNL307C                 | MCK1          |
| YPR052C                                          | NHP6A         | YNL236W                 | SIN4          |
| YLR288C                                          | MEC3          | YML115C                 | VAN1          |
| YBR127C                                          | VMA2          | YDL226C                 | GCS1          |
| YMR109W                                          | MYO5          | YLR370C                 | ARC18         |
| YDR477W                                          | SNF1          | YNL079C                 | TPM1          |
| YHR200W                                          | RPN10         | YLR371W                 | ROM2          |
| YHR134W                                          | WSS1          | YGR270W                 | YTA7          |
| YLR360W                                          | VPS38         | YNL041C                 | COG6          |
| YMR089C                                          | YTA12         | YKL041W                 | VPS24         |
| YPL022W                                          | RAD1          | YDL013W                 | SLX5          |
| YPR017C                                          | DSS4          | YGR261C                 | APL6          |
| YHR084W                                          | STE12         | YJL128C                 | PBS2          |
| YDL122W                                          | UBP1          | YIL148W                 | RPL40A        |
| YNL058C                                          | YNL058C       | YPR030W                 | CSR2          |
| YLR381W                                          | CTF3          | YAR014C                 | BUD14         |
| YDR137W                                          | RGP1          | YEL053C                 | MAK10         |
| YDR484W                                          | VPS52         | YOR290C                 | SNF2          |
| YPR046W                                          | MCM16         | YOL081W                 | IRA2          |
| YLR381W                                          | CTF3          | YOL067C                 | RTG1          |
| YBR200W                                          | BEM1          | YHR205W                 | SCH9          |

| Predictions at threshold level 0.75 continued... |               |                         |               |
|--------------------------------------------------|---------------|-------------------------|---------------|
| Gene1 of predicted pair                          |               | Gene2 of predicted pair |               |
| Systematic Name                                  | Standard Name | Systematic Name         | Standard Name |
| YCL037C                                          | SRO9          | YNL041C                 | COG6          |
| YPL158C                                          | YPL158C       | YNL079C                 | TPM1          |
| YDL116W                                          | NUP84         | YMR273C                 | ZDS1          |
| YDR293C                                          | SSD1          | YGL253W                 | HXK2          |
| YKR001C                                          | VPS1          | YER122C                 | GLO3          |
| YDR146C                                          | SWI5          | YPR120C                 | CLB5          |
| YER179W                                          | DMC1          | YDR146C                 | SWI5          |
| YGL212W                                          | VAM7          | YOR066W                 | MSA1          |
| YNL199C                                          | GCR2          | YOR038C                 | HIR2          |
| YDR103W                                          | STE5          | YLR452C                 | SST2          |
| YOR195W                                          | SLK19         | YOL081W                 | IRA2          |
| YHR178W                                          | STB5          | YLR386W                 | VAC14         |
| YPR030W                                          | CSR2          | YOL121C                 | RPS19A        |
| YNL041C                                          | COG6          | YLR357W                 | RSC2          |
| YBR200W                                          | BEM1          | YNL107W                 | YAF9          |
| YGL223C                                          | COG1          | YNR032W                 | PPG1          |
| YOL018C                                          | TLG2          | YPR032W                 | SRO7          |
| YGL087C                                          | MMS2          | YNL288W                 | CAF40         |
| YPL137C                                          | GIP3          | YDL192W                 | ARF1          |
| YBL078C                                          | ATG8          | YDR080W                 | VPS41         |
| YLR360W                                          | VPS38         | YNL238W                 | KEX2          |
| YDR156W                                          | RPA14         | YNL107W                 | YAF9          |
| YBR290W                                          | BSD2          | YMR199W                 | CLN1          |
| YDR320C                                          | SWA2          | YJR033C                 | RAV1          |
| YMR284W                                          | YKU70         | YDR469W                 | SDC1          |
| YBL101C                                          | ECM21         | YMR038C                 | CCS1          |
| YDL006W                                          | PTC1          | YOL081W                 | IRA2          |
| YGR104C                                          | SRB5          | YPR072W                 | NOT5          |
| YNL031C                                          | HHT2          | YDR440W                 | DOT1          |

| Predictions at threshold level 0.75 continued... |               |                         |               |
|--------------------------------------------------|---------------|-------------------------|---------------|
| Gene1 of predicted pair                          |               | Gene2 of predicted pair |               |
| Systematic Name                                  | Standard Name | Systematic Name         | Standard Name |
| YER174C                                          | GRX4          | YGR262C                 | BUD32         |
| YDL006W                                          | PTC1          | YNL127W                 | FAR11         |
| YKL010C                                          | UFD4          | YDR245W                 | MNN10         |
| YDR245W                                          | MNN10         | YLR371W                 | ROM2          |
| YMR039C                                          | SUB1          | YJR140C                 | HIR3          |
| YNL106C                                          | INP52         | YGL163C                 | RAD54         |
| YMR224C                                          | MRE11         | YLR381W                 | CTF3          |
| YMR016C                                          | SOK2          | YMR037C                 | MSN2          |
| YDR156W                                          | RPA14         | YLR371W                 | ROM2          |
| YDR156W                                          | RPA14         | YDR245W                 | MNN10         |
| YGL124C                                          | MON1          | YAL002W                 | VPS8          |
| YKR020W                                          | VPS51         | YGL124C                 | MON1          |
| YKL048C                                          | ELM1          | YGL253W                 | HXK2          |
| YAL024C                                          | LTE1          | YDR439W                 | LRS4          |
| YBL021C                                          | HAP3          | YDL155W                 | CLB3          |
| YIL036W                                          | CST6          | YNL248C                 | RPA49         |
| YDL223C                                          | HBT1          | YBR280C                 | SAF1          |
| YDR439W                                          | LRS4          | YCR086W                 | CSM1          |
| YOR212W                                          | STE4          | YLR206W                 | ENT2          |
| YJL138C                                          | TIF2          | YOR368W                 | RAD17         |
| YCR088W                                          | ABP1          | YJL029C                 | VPS53         |
| YGL060W                                          | YBP2          | YJR135C                 | MCM22         |
| YDL059C                                          | RAD59         | YDR363W-A               | SEM1          |
| YMR311C                                          | GLC8          | YMR214W                 | SCJ1          |
| YGL078C                                          | DBP3          | YLR192C                 | HCR1          |
| YBR264C                                          | YPT10         | YML001W                 | YPT7          |
| YBR274W                                          | CHK1          | YML016C                 | PPZ1          |
| YOR127W                                          | RGA1          | YBR200W                 | BEM1          |
| YLR360W                                          | VPS38         | YOL067C                 | RTG1          |

| Predictions at threshold level 0.75 continued... |               |                         |               |
|--------------------------------------------------|---------------|-------------------------|---------------|
| Gene1 of predicted pair                          |               | Gene2 of predicted pair |               |
| Systematic Name                                  | Standard Name | Systematic Name         | Standard Name |
| YNL166C                                          | BNI5          | YEL053C                 | MAK10         |
| YGL033W                                          | HOP2          | YHR156C                 | LIN1          |
| YOR290C                                          | SNF2          | YDL077C                 | VAM6          |
| YLR095C                                          | IOC2          | YJL095W                 | BCK1          |
| YOL067C                                          | RTG1          | YPR119W                 | CLB2          |
| YPR017C                                          | DSS4          | YBL102W                 | SFT2          |
| YNL307C                                          | MCK1          | YPR046W                 | MCM16         |
| YNL139C                                          | RLR1          | YCL011C                 | GBP2          |
| YJR059W                                          | PTK2          | YKL068W                 | NUP100        |
| YBR020W                                          | GAL1          | YKL160W                 | ELF1          |
| YIL156W                                          | UBP7          | YOR358W                 | HAP5          |
| YDL006W                                          | PTC1          | YPL120W                 | VPS30         |
| YJR084W                                          | CSN12         | YBL025W                 | RRN10         |
| YEL053C                                          | MAK10         | YFR036W                 | CDC26         |
| YML063W                                          | RPS1B         | YER102W                 | RPS8B         |
| YML016C                                          | PPZ1          | YHR115C                 | DMA1          |
| YPL042C                                          | SSN3          | YGL237C                 | HAP2          |
| YLR080W                                          | EMP46         | YFL048C                 | EMP47         |
| YBR215W                                          | HPC2          | YDR254W                 | CHL4          |
| YLR386W                                          | VAC14         | YDR440W                 | DOT1          |
| YLR234W                                          | TOP3          | YAL002W                 | VPS8          |
| YKR001C                                          | VPS1          | YDR076W                 | RAD55         |
| YNL041C                                          | COG6          | YDR310C                 | SUM1          |
| YGL115W                                          | SNF4          | YPR120C                 | CLB5          |
| YOR327C                                          | SNC2          | YDR207C                 | UME6          |
| YDL116W                                          | NUP84         | YML012W                 | ERV25         |
| YGL087C                                          | MMS2          | YPL057C                 | SUR1          |
| YLR452C                                          | SST2          | YDL192W                 | ARF1          |
| YJL176C                                          | SWI3          | YLL039C                 | UBI4          |

| Predictions at threshold level 0.75 continued... |               |                         |               |
|--------------------------------------------------|---------------|-------------------------|---------------|
| Gene1 of predicted pair                          |               | Gene2 of predicted pair |               |
| Systematic Name                                  | Standard Name | Systematic Name         | Standard Name |
| YNR058W                                          | BIO3          | YFR021W                 | ATG18         |
| YOR195W                                          | SLK19         | YJL006C                 | CTK2          |
| YDR477W                                          | SNF1          | YGR252W                 | GCN5          |
| YEL044W                                          | IES6          | YJL095W                 | BCK1          |
| YOR195W                                          | SLK19         | YDR183W                 | PLP1          |
| YPL024W                                          | RMI1          | YHR013C                 | ARD1          |
| YKL110C                                          | KTI12         | YGL163C                 | RAD54         |
| YJR033C                                          | RAV1          | YNR032W                 | PPG1          |
| YJL036W                                          | SNX4          | YGL115W                 | SNF4          |
| YOR308C                                          | SNU66         | YAL002W                 | VPS8          |
| YDR318W                                          | MCM21         | YDL047W                 | SIT4          |
| YCR024C-A                                        | PMP1          | YER110C                 | KAP123        |
| YGL025C                                          | PGD1          | YBL025W                 | RRN10         |
| YOL111C                                          | MDY2          | YCR053W                 | THR4          |
| YJL095W                                          | BCK1          | YBR181C                 | RPS6B         |
| YJL060W                                          | BNA3          | YMR055C                 | BUB2          |
| YBL058W                                          | SHP1          | YFR036W                 | CDC26         |
| YHL031C                                          | GOS1          | YDR363W-A               | SEM1          |
| YNL087W                                          | TCB2          | YDR484W                 | VPS52         |
| YIL156W                                          | UBP7          | YMR109W                 | MYO5          |
| YPL024W                                          | RMI1          | YDL223C                 | HBT1          |
| YNL032W                                          | SIW14         | YNL058C                 | YNL058C       |
| YPL105C                                          | YPL105C       | YOL018C                 | TLG2          |
| YLR337C                                          | VRP1          | YDL002C                 | NHP10         |
| YJL183W                                          | MNN11         | YBR114W                 | RAD16         |
| YNL291C                                          | MID1          | YJR040W                 | GEF1          |
| YDR477W                                          | SNF1          | YHR081W                 | LRP1          |
| YLR360W                                          | VPS38         | YNL127W                 | FAR11         |
| YBL067C                                          | UBP13         | YLR370C                 | ARC18         |

| Predictions at threshold level 0.75 continued... |               |                         |               |
|--------------------------------------------------|---------------|-------------------------|---------------|
| Gene1 of predicted pair                          |               | Gene2 of predicted pair |               |
| Systematic Name                                  | Standard Name | Systematic Name         | Standard Name |
| YHR111W                                          | UBA4          | YCR086W                 | CSM1          |
| YNL307C                                          | MCK1          | YER139C                 | YER139C       |
| YIL053W                                          | RHR2          | YFR036W                 | CDC26         |
| YJR040W                                          | GEF1          | YJR060W                 | CBF1          |
| YMR116C                                          | ASC1          | YDL013W                 | SLX5          |
| YOR275C                                          | RIM20         | YNL079C                 | TPM1          |
| YOR066W                                          | MSA1          | YLR370C                 | ARC18         |
| YIL148W                                          | RPL40A        | YFL047W                 | RGD2          |
| YMR127C                                          | SAS2          | YBR010W                 | HHT1          |
| YJR052W                                          | RAD7          | YER162C                 | RAD4          |
| YBR030W                                          | YBR030W       | YMR142C                 | RPL13B        |
| YOR080W                                          | DIA2          | YJR035W                 | RAD26         |
| YPR120C                                          | CLB5          | YPR046W                 | MCM16         |
| YDL101C                                          | DUN1          | YLR410W                 | VIP1          |
| YGL060W                                          | YBP2          | YDR318W                 | MCM21         |
| YJR140C                                          | HIR3          | YLR320W                 | MMS22         |
| YPR120C                                          | CLB5          | YFR030W                 | MET10         |
| YMR202W                                          | ERG2          | YPR040W                 | TIP41         |
| YFR032C-A                                        | RPL29         | YGR135W                 | PRE9          |
| YAL024C                                          | LTE1          | YNL116W                 | DMA2          |
| YFL023W                                          | BUD27         | YGL163C                 | RAD54         |
| YML117W                                          | NAB6          | YKR020W                 | VPS51         |
| YFR031C-A                                        | RPL2A         | YIL159W                 | BNR1          |
| YHR081W                                          | LRP1          | YOR327C                 | SNC2          |
| YDR310C                                          | SUM1          | YDR207C                 | UME6          |
| YOR337W                                          | TEA1          | YDR358W                 | GGA1          |
| YEL056W                                          | HAT2          | YJL190C                 | RPS22A        |
| YGR108W                                          | CLB1          | YPR120C                 | CLB5          |
| YNL325C                                          | FIG4          | YNL032W                 | SIW14         |



| Predictions at threshold level 0.75 continued... |               |                         |               |
|--------------------------------------------------|---------------|-------------------------|---------------|
| Gene1 of predicted pair                          |               | Gene2 of predicted pair |               |
| Systematic Name                                  | Standard Name | Systematic Name         | Standard Name |
| YOR109W                                          | INP53         | YML001W                 | YPT7          |
| YIL034C                                          | CAP2          | YLR381W                 | CTF3          |
| YLR234W                                          | TOP3          | YLR435W                 | TSR2          |
| YPL115C                                          | BEM3          | YER114C                 | BOI2          |
| YDR009W                                          | GAL3          | YPL248C                 | GAL4          |
| YER114C                                          | BOI2          | YCR002C                 | CDC10         |
| YNL206C                                          | RTT106        | YLR452C                 | SST2          |
| YDL190C                                          | UFD2          | YDR363W-A               | SEM1          |
| YGL237C                                          | HAP2          | YHR111W                 | UBA4          |
| YIL159W                                          | BNR1          | YDL223C                 | HBT1          |
| YPR036W                                          | VMA13         | YER040W                 | GLN3          |
| YMR142C                                          | RPL13B        | YNL087W                 | TCB2          |
| YMR152W                                          | YIM1          | YDL192W                 | ARF1          |
| YEL053C                                          | MAK10         | YNR032W                 | PPG1          |
| YIL053W                                          | RHR2          | YMR152W                 | YIM1          |
| YNR052C                                          | POP2          | YGL252C                 | RTG2          |
| YOR337W                                          | TEA1          | YBL025W                 | RRN10         |
| YLR090W                                          | XDJ1          | YGL124C                 | MON1          |
| YOR033C                                          | EXO1          | YBL079W                 | NUP170        |
| YKL116C                                          | PRR1          | YKR099W                 | BAS1          |
| YHR081W                                          | LRP1          | YDL077C                 | VAM6          |
| YGL147C                                          | RPL9A         | YMR224C                 | MRE11         |
| YPR036W                                          | VMA13         | YLR370C                 | ARC18         |
| YFL026W                                          | STE2          | YDR183W                 | PLP1          |
| YGR270W                                          | YTA7          | YER122C                 | GLO3          |
| YOR106W                                          | VAM3          | YPL057C                 | SUR1          |
| YLR386W                                          | VAC14         | YDR183W                 | PLP1          |
| YER110C                                          | KAP123        | YMR273C                 | ZDS1          |
| YOR337W                                          | TEA1          | YMR016C                 | SOK2          |

| Predictions at threshold level 0.75 continued... |               |                         |               |
|--------------------------------------------------|---------------|-------------------------|---------------|
| Gene1 of predicted pair                          |               | Gene2 of predicted pair |               |
| Systematic Name                                  | Standard Name | Systematic Name         | Standard Name |
| YNL291C                                          | MID1          | YDL013W                 | SLX5          |
| YIR005W                                          | IST3          | YLR254C                 | NDL1          |
| YHR060W                                          | VMA22         | YJR060W                 | CBF1          |
| YGR261C                                          | APL6          | YPR032W                 | SRO7          |
| YGR104C                                          | SRB5          | YBR010W                 | HHT1          |
| YDR004W                                          | RAD57         | YPL253C                 | VIK1          |
| YLR292C                                          | SEC72         | YHR012W                 | VPS29         |
| YLR360W                                          | VPS38         | YKR001C                 | VPS1          |
| YBR215W                                          | HPC2          | YDR310C                 | SUM1          |
| YNR052C                                          | POP2          | YGL163C                 | RAD54         |
| YEL065W                                          | SIT1          | YBR019C                 | GAL10         |
| YOR195W                                          | SLK19         | YJL124C                 | LSM1          |
| YBR108W                                          | YBR108W       | YDR289C                 | RTT103        |
| YDR202C                                          | RAV2          | YEL051W                 | VMA8          |
| YJL124C                                          | LSM1          | YNL248C                 | RPA49         |
| YFR031C-A                                        | RPL2A         | YBR030W                 | YBR030W       |
| YDL047W                                          | SIT4          | YNL051W                 | COG5          |
| YDR129C                                          | SAC6          | YLR396C                 | VPS33         |
| YBR173C                                          | UMP1          | YMR198W                 | CIK1          |
| YLR360W                                          | VPS38         | YOL108C                 | INO4          |
| YML016C                                          | PPZ1          | YHR158C                 | KEL1          |
| YOR069W                                          | VPS5          | YNL041C                 | COG6          |
| YGL175C                                          | SAE2          | YPL256C                 | CLN2          |
| YIL034C                                          | CAP2          | YBR107C                 | IML3          |
| YKR059W                                          | TIF1          | YJR032W                 | CPR7          |
| YJL172W                                          | CPS1          | YBR036C                 | CSG2          |
| YDR358W                                          | GGA1          | YAL030W                 | SNC1          |
| YIL053W                                          | RHR2          | YJL183W                 | MNN11         |
| YFR010W                                          | UBP6          | YFL023W                 | BUD27         |

| Predictions at threshold level 0.75 continued... |               |                         |               |
|--------------------------------------------------|---------------|-------------------------|---------------|
| Gene1 of predicted pair                          |               | Gene2 of predicted pair |               |
| Systematic Name                                  | Standard Name | Systematic Name         | Standard Name |
| YJR060W                                          | CBF1          | YOL054W                 | PSH1          |
| YFL004W                                          | VTC2          | YER072W                 | VTC1          |
| YBR290W                                          | BSD2          | YPR046W                 | MCM16         |
| YBL016W                                          | FUS3          | YJL157C                 | FAR1          |
| YDL006W                                          | PTC1          | YOR327C                 | SNC2          |
| YNL199C                                          | GCR2          | YLR182W                 | SWI6          |
| YER110C                                          | KAP123        | YMR109W                 | MYO5          |
| YPL240C                                          | HSP82         | YIL033C                 | BCY1          |
| YLR288C                                          | MEC3          | YOR043W                 | WHI2          |
| YCR086W                                          | CSM1          | YOL067C                 | RTG1          |
| YDR137W                                          | RGP1          | YPR046W                 | MCM16         |
| YOR109W                                          | INP53         | YOR035C                 | SHE4          |
| YPR036W                                          | VMA13         | YER072W                 | VTC1          |
| YBL008W                                          | HIR1          | YBR195C                 | MSI1          |
| YJL124C                                          | LSM1          | YGL148W                 | ARO2          |
| YMR224C                                          | MRE11         | YOR141C                 | ARP8          |
| YNL199C                                          | GCR2          | YAL002W                 | VPS8          |
| YBR173C                                          | UMP1          | YBR036C                 | CSG2          |
| YNL229C                                          | URE2          | YGR135W                 | PRE9          |
| YHR056C                                          | RSC30         | YKL114C                 | APN1          |
| YMR055C                                          | BUB2          | YOR141C                 | ARP8          |
| YGR133W                                          | PEX4          | YBR082C                 | UBC4          |
| YGL054C                                          | ERV14         | YPR119W                 | CLB2          |
| YFL033C                                          | RIM15         | YNL127W                 | FAR11         |
| YDL155W                                          | CLB3          | YDR076W                 | RAD55         |
| YBL078C                                          | ATG8          | YAL030W                 | SNC1          |
| YLR315W                                          | NKP2          | YLR182W                 | SWI6          |
| YER075C                                          | PTP3          | YPR119W                 | CLB2          |
| YIL053W                                          | RHR2          | YOR327C                 | SNC2          |

| Predictions at threshold level 0.75 continued... |               |                         |               |
|--------------------------------------------------|---------------|-------------------------|---------------|
| Gene1 of predicted pair                          |               | Gene2 of predicted pair |               |
| Systematic Name                                  | Standard Name | Systematic Name         | Standard Name |
| YDR335W                                          | MSN5          | YIR005W                 | IST3          |
| YML115C                                          | VAN1          | YHR060W                 | VMA22         |
| YMR216C                                          | SKY1          | YNL297C                 | MON2          |
| YDR318W                                          | MCM21         | YML112W                 | CTK3          |
| YGL115W                                          | SNF4          | YKR030W                 | GMH1          |
| YML117W                                          | NAB6          | YMR116C                 | ASC1          |
| YIL008W                                          | URM1          | YPR046W                 | MCM16         |
| YDR320C                                          | SWA2          | YNL297C                 | MON2          |
| YEL015W                                          | EDC3          | YNL147W                 | LSM7          |
| YCR020C-A                                        | MAK31         | YPR017C                 | DSS4          |
| YDR202C                                          | RAV2          | YOR327C                 | SNC2          |
| YJR140C                                          | HIR3          | YER139C                 | YER139C       |
| YKL048C                                          | ELM1          | YLR093C                 | NYV1          |
| YKR057W                                          | RPS21A        | YKL101W                 | HSL1          |
| YCL027W                                          | FUS1          | YKL129C                 | MYO3          |
| YML058W                                          | SML1          | YPL022W                 | RAD1          |
| YIL045W                                          | PIG2          | YLR258W                 | GSY2          |
| YOR038C                                          | HIR2          | YOR124C                 | UBP2          |
| YBL101C                                          | ECM21         | YBR082C                 | UBC4          |
| YFR031C-A                                        | RPL2A         | YNL087W                 | TCB2          |
| YDR004W                                          | RAD57         | YBR057C                 | MUM2          |
| YBL103C                                          | RTG3          | YJR032W                 | CPR7          |
| YGL033W                                          | HOP2          | YMR016C                 | SOK2          |
| YKL110C                                          | KTI12         | YNL116W                 | DMA2          |
| YMR152W                                          | YIM1          | YGL003C                 | CDH1          |
| YLR315W                                          | NKP2          | YOR038C                 | HIR2          |
| YDR174W                                          | HMO1          | YDR156W                 | RPA14         |
| YPR046W                                          | MCM16         | YLR093C                 | NYV1          |
| YML115C                                          | VAN1          | YLR441C                 | RPS1A         |

| Predictions at threshold level 0.75 continued... |               |                         |               |
|--------------------------------------------------|---------------|-------------------------|---------------|
| Gene1 of predicted pair                          |               | Gene2 of predicted pair |               |
| Systematic Name                                  | Standard Name | Systematic Name         | Standard Name |
| YOR132W                                          | VPS17         | YER162C                 | RAD4          |
| YFR036W                                          | CDC26         | YOR141C                 | ARP8          |
| YER044C                                          | ERG28         | YFR036W                 | CDC26         |
| YNL025C                                          | SSN8          | YNR052C                 | POP2          |
| YDL083C                                          | RPS16B        | YGL003C                 | CDH1          |
| YMR127C                                          | SAS2          | YGL124C                 | MON1          |
| YNL069C                                          | RPL16B        | YDR153C                 | ENT5          |
| YLR095C                                          | IOC2          | YFR010W                 | UBP6          |
| YDL020C                                          | RPN4          | YLR135W                 | SLX4          |
| YFR031C-A                                        | RPL2A         | YOL111C                 | MDY2          |
| YOR327C                                          | SNC2          | YNL051W                 | COG5          |
| YDR176W                                          | NGG1          | YDR448W                 | ADA2          |
| YMR054W                                          | STV1          | YKL080W                 | VMA5          |
| YPR018W                                          | RLF2          | YPR046W                 | MCM16         |
| YDR071C                                          | PAA1          | YNL030W                 | HHF2          |
| YNL094W                                          | APP1          | YMR109W                 | MYO5          |
| YFL023W                                          | BUD27         | YDR358W                 | GGA1          |
| YAL024C                                          | LTE1          | YML115C                 | VAN1          |
| YCR077C                                          | PAT1          | YPR119W                 | CLB2          |
| YDR174W                                          | HMO1          | YJL006C                 | CTK2          |
| YDL020C                                          | RPN4          | YPR120C                 | CLB5          |
| YPR046W                                          | MCM16         | YKL101W                 | HSL1          |
| YNL068C                                          | FKH2          | YHR200W                 | RPN10         |
| YOR080W                                          | DIA2          | YLR058C                 | SHM2          |
| YBL058W                                          | SHP1          | YML071C                 | COG8          |
| YMR142C                                          | RPL13B        | YGL212W                 | VAM7          |
| YEL050C                                          | RML2          | YLR079W                 | SIC1          |
| YOR066W                                          | MSA1          | YER139C                 | YER139C       |
| YBR200W                                          | BEM1          | YOL054W                 | PSH1          |

| Predictions at threshold level 0.75 continued... |               |                         |               |
|--------------------------------------------------|---------------|-------------------------|---------------|
| Gene1 of predicted pair                          |               | Gene2 of predicted pair |               |
| Systematic Name                                  | Standard Name | Systematic Name         | Standard Name |
| YJR060W                                          | CBF1          | YLR182W                 | SWI6          |
| YNL238W                                          | KEX2          | YLR309C                 | IMH1          |
| YLL007C                                          | YLL007C       | YIL008W                 | URM1          |
| YDR320C                                          | SWA2          | YOR069W                 | VPS5          |
| YMR039C                                          | SUB1          | YNL147W                 | LSM7          |
| YFL033C                                          | RIM15         | YDR207C                 | UME6          |
| YBR031W                                          | RPL4A         | YBL072C                 | RPS8A         |
| YFR031C-A                                        | RPL2A         | YLR452C                 | SST2          |
| YKR099W                                          | BAS1          | YKR035W-A               | DID2          |
| YDR174W                                          | HMO1          | YML112W                 | CTK3          |
| YKL116C                                          | PRR1          | YNL041C                 | COG6          |
| YKL126W                                          | YPK1          | YER139C                 | YER139C       |
| YIL053W                                          | RHR2          | YNL238W                 | KEX2          |
| YMR054W                                          | STV1          | YNL107W                 | YAF9          |
| YFL023W                                          | BUD27         | YPL195W                 | APL5          |
| YMR095C                                          | SNO1          | YMR142C                 | RPL13B        |
| YDR156W                                          | RPA14         | YLR254C                 | NDL1          |
| YNL069C                                          | RPL16B        | YNL051W                 | COG5          |
| YOR132W                                          | VPS17         | YHR178W                 | STB5          |
| YNL238W                                          | KEX2          | YDR310C                 | SUM1          |
| YOR275C                                          | RIM20         | YPL158C                 | YPL158C       |
| YMR109W                                          | MYO5          | YMR055C                 | BUB2          |
| YOR127W                                          | RGA1          | YHR115C                 | DMA1          |
| YDR363W-A                                        | SEM1          | YKR001C                 | VPS1          |
| YJR005W                                          | APL1          | YDR318W                 | MCM21         |
| YBR200W                                          | BEM1          | YOL111C                 | MDY2          |
| YGR104C                                          | SRB5          | YGL178W                 | MPT5          |
| YBR057C                                          | MUM2          | YDR076W                 | RAD55         |
| YGR081C                                          | SLX9          | YMR231W                 | PEP5          |

| Predictions at threshold level 0.75 continued... |               |                         |               |
|--------------------------------------------------|---------------|-------------------------|---------------|
| Gene1 of predicted pair                          |               | Gene2 of predicted pair |               |
| Systematic Name                                  | Standard Name | Systematic Name         | Standard Name |
| YGR072W                                          | UPF3          | YEL053C                 | MAK10         |
| YLR320W                                          | MMS22         | YBL025W                 | RRN10         |
| YHR060W                                          | VMA22         | YOR327C                 | SNC2          |
| YIL159W                                          | BNR1          | YNL238W                 | KEX2          |
| YPL037C                                          | EGD1          | YDR207C                 | UME6          |
| YFL023W                                          | BUD27         | YKR099W                 | BAS1          |
| YCR081W                                          | SRB8          | YMR199W                 | CLN1          |
| YMR202W                                          | ERG2          | YJR035W                 | RAD26         |
| YMR133W                                          | REC114        | YFR036W                 | CDC26         |
| YDL116W                                          | NUP84         | YLR288C                 | MEC3          |
| YDL185W                                          | TFP1          | YGR105W                 | VMA21         |
| YJR060W                                          | CBF1          | YNL116W                 | DMA2          |
| YNL201C                                          | PSY2          | YNR052C                 | POP2          |
| YLR447C                                          | VMA6          | YKR001C                 | VPS1          |
| YBR217W                                          | ATG12         | YER162C                 | RAD4          |
| YNL054W                                          | VAC7          | YKR061W                 | KTR2          |
| YDR320C                                          | SWA2          | YML001W                 | YPT7          |
| YOR337W                                          | TEA1          | YNL325C                 | FIG4          |
| YBR173C                                          | UMP1          | YHR060W                 | VMA22         |
| YLR093C                                          | NYV1          | YMR230W                 | RPS10B        |
| YER116C                                          | SLX8          | YGL124C                 | MON1          |
| YHR178W                                          | STB5          | YOR213C                 | SAS5          |
| YDL155W                                          | CLB3          | YCR086W                 | CSM1          |
| YLR090W                                          | XDJ1          | YGL003C                 | CDH1          |
| YKL101W                                          | HSL1          | YJL095W                 | BCK1          |
| YLR377C                                          | FBP1          | YOL126C                 | MDH2          |
| YFR010W                                          | UBP6          | YNL076W                 | MKS1          |
| YDR254W                                          | CHL4          | YKL110C                 | KTI12         |
| YJL124C                                          | LSM1          | YMR055C                 | BUB2          |

| Predictions at threshold level 0.75 continued... |               |                         |               |
|--------------------------------------------------|---------------|-------------------------|---------------|
| Gene1 of predicted pair                          |               | Gene2 of predicted pair |               |
| Systematic Name                                  | Standard Name | Systematic Name         | Standard Name |
| YPL050C                                          | MNN9          | YBL047C                 | EDE1          |
| YBR200W                                          | BEM1          | YJR056C                 | YJR056C       |
| YLL007C                                          | YLL007C       | YPR046W                 | MCM16         |
| YDR183W                                          | PLP1          | YNL116W                 | DMA2          |
| YMR142C                                          | RPL13B        | YKR099W                 | BAS1          |
| YIL053W                                          | RHR2          | YEL053C                 | MAK10         |
| YKR072C                                          | SIS2          | YLR288C                 | MEC3          |
| YDR479C                                          | PEX29         | YLR324W                 | PEX30         |
| YKR048C                                          | NAP1          | YOR208W                 | PTP2          |
| YEL009C                                          | GCN4          | YOR023C                 | AHC1          |
| YGL223C                                          | COG1          | YOR109W                 | INP53         |
| YKR035W-A                                        | DID2          | YDL192W                 | ARF1          |
| YHL031C                                          | GOS1          | YGL054C                 | ERV14         |
| YLR292C                                          | SEC72         | YHR111W                 | UBA4          |
| YIL159W                                          | BNR1          | YLR452C                 | SST2          |
| YDL116W                                          | NUP84         | YMR055C                 | BUB2          |
| YDL002C                                          | NHP10         | YBR036C                 | CSG2          |
| YCR066W                                          | RAD18         | YPL195W                 | APL5          |
| YJL065C                                          | DLS1          | YOR304W                 | ISW2          |
| YLR360W                                          | VPS38         | YJR033C                 | RAV1          |
| YNL307C                                          | MCK1          | YHR081W                 | LRP1          |
| YKR101W                                          | SIR1          | YLR399C                 | BDF1          |
| YKR057W                                          | RPS21A        | YBR084C-A               | RPL19A        |
| YJR059W                                          | PTK2          | YPL246C                 | RBD2          |
| YNL307C                                          | MCK1          | YJR032W                 | CPR7          |
| YIL076W                                          | SEC28         | YPL037C                 | EGD1          |
| YJR024C                                          | MDE1          | YKR024C                 | DBP7          |
| YGR184C                                          | UBR1          | YHR052W                 | CIC1          |
| YNL288W                                          | CAF40         | YGR188C                 | BUB1          |



| Predictions at threshold level 0.75 continued... |               |                         |               |
|--------------------------------------------------|---------------|-------------------------|---------------|
| Gene1 of predicted pair                          |               | Gene2 of predicted pair |               |
| Systematic Name                                  | Standard Name | Systematic Name         | Standard Name |
| YGL212W                                          | VAM7          | YAL002W                 | VPS8          |
| YER001W                                          | MNN1          | YGL212W                 | VAM7          |
| YDR245W                                          | MNN10         | YDR363W-A               | SEM1          |
| YBR290W                                          | BSD2          | YPL018W                 | CTF19         |
| YOR270C                                          | VPH1          | YOL121C                 | RPS19A        |
| YFR031C-A                                        | RPL2A         | YPL057C                 | SUR1          |
| YJL172W                                          | CPS1          | YJR084W                 | CSN12         |
| YLR119W                                          | SRN2          | YGL033W                 | HOP2          |
| YHR178W                                          | STB5          | YDR183W                 | PLP1          |
| YER096W                                          | SHC1          | YCR077C                 | PAT1          |
| YDR477W                                          | SNF1          | YNL058C                 | YNL058C       |
| YHR079C                                          | IRE1          | YBR010W                 | HHT1          |
| YNL243W                                          | SLA2          | YDR358W                 | GGA1          |
| YML103C                                          | NUP188        | YER115C                 | SPR6          |
| YPL253C                                          | VIK1          | YPL256C                 | CLN2          |
| YPL195W                                          | APL5          | YDR310C                 | SUM1          |
| YPL024W                                          | RMI1          | YPL022W                 | RAD1          |
| YLR320W                                          | MMS22         | YBR082C                 | UBC4          |
| YNL291C                                          | MID1          | YEL051W                 | VMA8          |
| YLR418C                                          | CDC73         | YGL094C                 | PAN2          |
| YKL126W                                          | YPK1          | YFR036W                 | CDC26         |
| YGR108W                                          | CLB1          | YHR178W                 | STB5          |
| YPL105C                                          | YPL105C       | YHR012W                 | VPS29         |
| YDL006W                                          | PTC1          | YOR035C                 | SHE4          |
| YPR051W                                          | MAK3          | YLR447C                 | VMA6          |
| YKR099W                                          | BAS1          | YCR053W                 | THR4          |
| YLR386W                                          | VAC14         | YDL077C                 | VAM6          |
| YDR108W                                          | GSG1          | YPL120W                 | VPS30         |
| YDR174W                                          | HMO1          | YNR052C                 | POP2          |

| Predictions at threshold level 0.75 continued... |               |                         |               |
|--------------------------------------------------|---------------|-------------------------|---------------|
| Gene1 of predicted pair                          |               | Gene2 of predicted pair |               |
| Systematic Name                                  | Standard Name | Systematic Name         | Standard Name |
| YMR133W                                          | REC114        | YER139C                 | YER139C       |
| YDR174W                                          | HMO1          | YHR115C                 | DMA1          |
| YDR004W                                          | RAD57         | YPR120C                 | CLB5          |
| YER115C                                          | SPR6          | YGL016W                 | KAP122        |
| YFL013C                                          | IES1          | YLR350W                 | ORM2          |
| YFL023W                                          | BUD27         | YBL025W                 | RRN10         |
| YLR410W                                          | VIP1          | YLR254C                 | NDL1          |
| YBR030W                                          | YBR030W       | YKR099W                 | BAS1          |
| YJR060W                                          | CBF1          | YLR315W                 | NKP2          |
| YLR234W                                          | TOP3          | YMR109W                 | MYO5          |
| YFR031C-A                                        | RPL2A         | YPL037C                 | EGD1          |
| YOR023C                                          | AHC1          | YDR254W                 | CHL4          |
| YKL117W                                          | SBA1          | YMR273C                 | ZDS1          |
| YDR101C                                          | ARX1          | YIL133C                 | RPL16A        |
| YBR280C                                          | SAF1          | YER122C                 | GLO3          |
| YDL101C                                          | DUN1          | YBL079W                 | NUP170        |
| YDR383C                                          | NKP1          | YNL054W                 | VAC7          |
| YEL065W                                          | SIT1          | YBL058W                 | SHP1          |
| YDR144C                                          | MKC7          | YJL183W                 | MNN11         |
| YBR126C                                          | TPS1          | YPL137C                 | GIP3          |
| YER087C-B                                        | SBH1          | YPR028W                 | YOP1          |
| YNL087W                                          | TCB2          | YLR320W                 | MMS22         |
| YJL124C                                          | LSM1          | YGL252C                 | RTG2          |
| YIL053W                                          | RHR2          | YDR207C                 | UME6          |
| YGL033W                                          | HOP2          | YOR270C                 | VPH1          |
| YCR081W                                          | SRB8          | YHR205W                 | SCH9          |
| YNL307C                                          | MCK1          | YNL238W                 | KEX2          |
| YCR020C-A                                        | MAK31         | YOL018C                 | TLG2          |
| YDR448W                                          | ADA2          | YGL066W                 | SGF73         |

| Predictions at threshold level 0.75 continued... |               |                         |               |
|--------------------------------------------------|---------------|-------------------------|---------------|
| Gene1 of predicted pair                          |               | Gene2 of predicted pair |               |
| Systematic Name                                  | Standard Name | Systematic Name         | Standard Name |
| YLR079W                                          | SIC1          | YIL036W                 | CST6          |
| YER122C                                          | GLO3          | YOL081W                 | IRA2          |
| YOR001W                                          | RRP6          | YNL199C                 | GCR2          |
| YML067C                                          | ERV41         | YFL048C                 | EMP47         |
| YDR363W-A                                        | SEM1          | YKL160W                 | ELF1          |
| YFR036W                                          | CDC26         | YLR254C                 | NDL1          |
| YGL087C                                          | MMS2          | YJL183W                 | MNN11         |
| YJL036W                                          | SNX4          | YHR060W                 | VMA22         |
| YGL054C                                          | ERV14         | YDR153C                 | ENT5          |
| YPR120C                                          | CLB5          | YNL116W                 | DMA2          |
| YDR358W                                          | GGA1          | YCR053W                 | THR4          |
| YKR001C                                          | VPS1          | YDR207C                 | UME6          |
| YIL159W                                          | BNR1          | YMR095C                 | SNO1          |
| YJL190C                                          | RPS22A        | YNL107W                 | YAF9          |
| YBR200W                                          | BEM1          | YDL155W                 | CLB3          |
| YDR108W                                          | GSG1          | YER122C                 | GLO3          |
| YNL069C                                          | RPL16B        | YDR080W                 | VPS41         |
| YPL137C                                          | GIP3          | YJR084W                 | CSN12         |
| YHR111W                                          | UBA4          | YEL053C                 | MAK10         |
| YDL116W                                          | NUP84         | YML095C                 | RAD10         |
| YKL139W                                          | CTK1          | YLR441C                 | RPS1A         |
| YGR104C                                          | SRB5          | YHR200W                 | RPN10         |
| YMR016C                                          | SOK2          | YPL137C                 | GIP3          |
| YKL110C                                          | KTI12         | YNL225C                 | CNM67         |
| YML001W                                          | YPT7          | YJR032W                 | CPR7          |
| YDL185W                                          | TFP1          | YJL006C                 | CTK2          |
| YNL107W                                          | YAF9          | YGL252C                 | RTG2          |
| YDR183W                                          | PLP1          | YJL183W                 | MNN11         |
| YGR261C                                          | APL6          | YNL127W                 | FAR11         |

| Predictions at threshold level 0.75 continued... |               |                         |               |
|--------------------------------------------------|---------------|-------------------------|---------------|
| Gene1 of predicted pair                          |               | Gene2 of predicted pair |               |
| Systematic Name                                  | Standard Name | Systematic Name         | Standard Name |
| YPL057C                                          | SUR1          | YDR378C                 | LSM6          |
| YJL183W                                          | MNN11         | YML097C                 | VPS9          |
| YGL178W                                          | MPT5          | YDL225W                 | SHS1          |
| YHR111W                                          | UBA4          | YGR135W                 | PRE9          |
| YBL079W                                          | NUP170        | YPL256C                 | CLN2          |
| YOR043W                                          | WHI2          | YLR371W                 | ROM2          |
| YNL106C                                          | INP52         | YIL103W                 | DPH1          |
| YER068W                                          | MOT2          | YJL140W                 | RPB4          |
| YKL135C                                          | APL2          | YDL192W                 | ARF1          |
| YPL037C                                          | EGD1          | YDR358W                 | GGA1          |
| YOR127W                                          | RGA1          | YAR014C                 | BUD14         |
| YLR094C                                          | GIS3          | YGL124C                 | MON1          |
| YGL003C                                          | CDH1          | YPL195W                 | APL5          |
| YEL044W                                          | IES6          | YLR370C                 | ARC18         |
| YDR358W                                          | GGA1          | YLR131C                 | ACE2          |
| YPL115C                                          | BEM3          | YOL067C                 | RTG1          |
| YAL024C                                          | LTE1          | YDR309C                 | GIC2          |
| YIL076W                                          | SEC28         | YKL213C                 | DOA1          |
| YOR195W                                          | SLK19         | YDR379W                 | RGA2          |
| YNL016W                                          | PUB1          | YOL090W                 | MSH2          |
| YPR167C                                          | MET16         | YER042W                 | MXR1          |
| YPR018W                                          | RLF2          | YER116C                 | SLX8          |
| YDR320C                                          | SWA2          | YOR112W                 | CEX1          |
| YPR131C                                          | NAT3          | YPR046W                 | MCM16         |
| YDR080W                                          | VPS41         | YLR309C                 | IMH1          |
| YBR173C                                          | UMP1          | YBL019W                 | APN2          |
| YPR018W                                          | RLF2          | YDR076W                 | RAD55         |
| YGL087C                                          | MMS2          | YDR092W                 | UBC13         |
| YDR254W                                          | CHL4          | YGL252C                 | RTG2          |

| Predictions at threshold level 0.75 continued... |               |                         |               |
|--------------------------------------------------|---------------|-------------------------|---------------|
| Gene1 of predicted pair                          |               | Gene2 of predicted pair |               |
| Systematic Name                                  | Standard Name | Systematic Name         | Standard Name |
| YEL060C                                          | PRB1          | YMR214W                 | SCJ1          |
| YNL201C                                          | PSY2          | YGR188C                 | BUB1          |
| YDR507C                                          | GIN4          | YKR020W                 | VPS51         |
| YDL059C                                          | RAD59         | YOR014W                 | RTS1          |
| YJL060W                                          | BNA3          | YDR318W                 | MCM21         |
| YJR056C                                          | YJR056C       | YBL025W                 | RRN10         |
| YLR441C                                          | RPS1A         | YHR203C                 | RPS4B         |
| YGR249W                                          | MGA1          | YIL076W                 | SEC28         |
| YOR270C                                          | VPH1          | YBR200W                 | BEM1          |
| YGL200C                                          | EMP24         | YFR036W                 | CDC26         |
| YKR061W                                          | KTR2          | YGR270W                 | YTA7          |
| YML103C                                          | NUP188        | YLR254C                 | NDL1          |
| YPL105C                                          | YPL105C       | YDL077C                 | VAM6          |
| YOL030W                                          | GAS5          | YDR207C                 | UME6          |
| YOR270C                                          | VPH1          | YHR039C-A               | VMA10         |
| YBL102W                                          | SFT2          | YAR014C                 | BUD14         |
| YOR140W                                          | SFL1          | YDR245W                 | MNN10         |
| YBR057C                                          | MUM2          | YNL329C                 | PEX6          |
| YDR202C                                          | RAV2          | YLR309C                 | IMH1          |
| YGR249W                                          | MGA1          | YGL115W                 | SNF4          |
| YML103C                                          | NUP188        | YDR335W                 | MSN5          |
| YDR289C                                          | RTT103        | YNL107W                 | YAF9          |
| YKR061W                                          | KTR2          | YNL225C                 | CNM67         |
| YML103C                                          | NUP188        | YNL307C                 | MCK1          |
| YDR335W                                          | MSN5          | YOR038C                 | HIR2          |
| YNL087W                                          | TCB2          | YBR036C                 | CSG2          |
| YKR001C                                          | VPS1          | YPL120W                 | VPS30         |
| YMR127C                                          | SAS2          | YPL018W                 | CTF19         |
| YFR031C-A                                        | RPL2A         | YMR153W                 | NUP53         |

| Predictions at threshold level 0.75 continued... |               |                         |               |
|--------------------------------------------------|---------------|-------------------------|---------------|
| Gene1 of predicted pair                          |               | Gene2 of predicted pair |               |
| Systematic Name                                  | Standard Name | Systematic Name         | Standard Name |
| YLR386W                                          | VAC14         | YOR327C                 | SNC2          |
| YLR381W                                          | CTF3          | YAL002W                 | VPS8          |
| YMR273C                                          | ZDS1          | YBL079W                 | NUP170        |
| YIL156W                                          | UBP7          | YHR114W                 | BZZ1          |
| YNL032W                                          | SIW14         | YHR039C-A               | VMA10         |
| YJL151C                                          | SNA3          | YHR114W                 | BZZ1          |
| YKL048C                                          | ELM1          | YLR233C                 | EST1          |
| YKR059W                                          | TIF1          | YHR178W                 | STB5          |
| YDR144C                                          | MKC7          | YGR188C                 | BUB1          |
| YGL133W                                          | ITC1          | YPL161C                 | BEM4          |
| YGL212W                                          | VAM7          | YHL020C                 | OPI1          |
| YPR120C                                          | CLB5          | YJL006C                 | CTK2          |
| YML103C                                          | NUP188        | YCR086W                 | CSM1          |
| YCR077C                                          | PAT1          | YLR425W                 | TUS1          |
| YDL116W                                          | NUP84         | YDR383C                 | NKP1          |
| YML115C                                          | VAN1          | YER096W                 | SHC1          |
| YFR010W                                          | UBP6          | YBR057C                 | MUM2          |
| YOL126C                                          | MDH2          | YOR358W                 | HAP5          |
| YGL025C                                          | PGD1          | YHR039C-A               | VMA10         |
| YDR110W                                          | FOB1          | YHR152W                 | SPO12         |
| YGL212W                                          | VAM7          | YER120W                 | SCS2          |
| YJL004C                                          | SYS1          | YDL192W                 | ARF1          |
| YPL050C                                          | MNN9          | YFL048C                 | EMP47         |
| YLR452C                                          | SST2          | YBR036C                 | CSG2          |
| YFR031C-A                                        | RPL2A         | YMR311C                 | GLC8          |
| YIL053W                                          | RHR2          | YOR290C                 | SNF2          |
| YIR009W                                          | MSL1          | YMR055C                 | BUB2          |
| YBL058W                                          | SHP1          | YLR441C                 | RPS1A         |
| YDR363W-A                                        | SEM1          | YOL091W                 | SPO21         |

| Predictions at threshold level 0.75 continued... |               |                         |               |
|--------------------------------------------------|---------------|-------------------------|---------------|
| Gene1 of predicted pair                          |               | Gene2 of predicted pair |               |
| Systematic Name                                  | Standard Name | Systematic Name         | Standard Name |
| YIL159W                                          | BNR1          | YOL111C                 | MDY2          |
| YOR270C                                          | VPH1          | YGL212W                 | VAM7          |
| YOR066W                                          | MSA1          | YML071C                 | COG8          |
| YER110C                                          | KAP123        | YNL199C                 | GCR2          |
| YNL297C                                          | MON2          | YML001W                 | YPT7          |
| YOR069W                                          | VPS5          | YJR058C                 | APS2          |
| YPL240C                                          | HSP82         | YHR079C-A               | SAE3          |
| YIL159W                                          | BNR1          | YHR060W                 | VMA22         |
| YDR456W                                          | NHX1          | YHR012W                 | VPS29         |
| YHR013C                                          | ARD1          | YNL116W                 | DMA2          |
| YGL212W                                          | VAM7          | YLR093C                 | NYV1          |
| YBR171W                                          | SEC66         | YLR370C                 | ARC18         |
| YPL253C                                          | VIK1          | YGL252C                 | RTG2          |
| YNL307C                                          | MCK1          | YKL048C                 | ELM1          |
| YPL195W                                          | APL5          | YBL025W                 | RRN10         |
| YPR018W                                          | RLF2          | YMR055C                 | BUB2          |
| YBL051C                                          | PIN4          | YJL190C                 | RPS22A        |
| YGL153W                                          | PEX14         | YLR425W                 | TUS1          |
| YDR443C                                          | SSN2          | YNR052C                 | POP2          |
| YAL014C                                          | SYN8          | YGL212W                 | VAM7          |
| YNL291C                                          | MID1          | YOR069W                 | VPS5          |
| YDR477W                                          | SNF1          | YDR146C                 | SWI5          |
| YMR198W                                          | CIK1          | YJR084W                 | CSN12         |
| YHR061C                                          | GIC1          | YGR152C                 | RSR1          |
| YER099C                                          | PRS2          | YHL011C                 | PRS3          |
| YOR127W                                          | RGA1          | YPR032W                 | SRO7          |
| YDL020C                                          | RPN4          | YPL024W                 | RMI1          |
| YDL223C                                          | HBT1          | YPL137C                 | GIP3          |
| YPL115C                                          | BEM3          | YBR107C                 | IML3          |

| Predictions at threshold level 0.75 continued... |               |                         |               |
|--------------------------------------------------|---------------|-------------------------|---------------|
| Gene1 of predicted pair                          |               | Gene2 of predicted pair |               |
| Systematic Name                                  | Standard Name | Systematic Name         | Standard Name |
| YOR231W                                          | MKK1          | YDL159W                 | STE7          |
| YLL007C                                          | YLL007C       | YCR086W                 | CSM1          |
| YHR013C                                          | ARD1          | YML097C                 | VPS9          |
| YNL041C                                          | COG6          | YEL051W                 | VMA8          |
| YOR275C                                          | RIM20         | YBL101C                 | ECM21         |
| YNR052C                                          | POP2          | YLR135W                 | SLX4          |
| YDR137W                                          | RGP1          | YKR001C                 | VPS1          |
| YOR033C                                          | EXO1          | YPR119W                 | CLB2          |
| YGR209C                                          | TRX2          | YIL008W                 | URM1          |
| YPL145C                                          | KES1          | YLR133W                 | CKI1          |
| YLR192C                                          | HCR1          | YER139C                 | YER139C       |
| YOR038C                                          | HIR2          | YHR167W                 | THP2          |
| YBR217W                                          | ATG12         | YDR358W                 | GGA1          |
| YLR079W                                          | SIC1          | YOL081W                 | IRA2          |
| YDR456W                                          | NHX1          | YMR311C                 | GLC8          |
| YJL006C                                          | CTK2          | YNL147W                 | LSM7          |
| YDR216W                                          | ADR1          | YPL248C                 | GAL4          |
| YNL076W                                          | MKS1          | YDR207C                 | UME6          |
| YPL115C                                          | BEM3          | YDR310C                 | SUM1          |
| YGR249W                                          | MGA1          | YMR153W                 | NUP53         |
| YFR031C-A                                        | RPL2A         | YNL127W                 | FAR11         |
| YMR172W                                          | HOT1          | YJL190C                 | RPS22A        |
| YPL057C                                          | SUR1          | YNL041C                 | COG6          |
| YPR084W                                          | YPR084W       | YPL105C                 | YPL105C       |
| YJR135C                                          | MCM22         | YKL101W                 | HSL1          |
| YGL237C                                          | HAP2          | YDL155W                 | CLB3          |
| YKR035W-A                                        | DID2          | YGL003C                 | CDH1          |
| YIL034C                                          | CAP2          | YGL237C                 | HAP2          |
| YGL135W                                          | RPL1B         | YBL047C                 | EDE1          |



| Predictions at threshold level 0.75 continued... |               |                         |               |
|--------------------------------------------------|---------------|-------------------------|---------------|
| Gene1 of predicted pair                          |               | Gene2 of predicted pair |               |
| Systematic Name                                  | Standard Name | Systematic Name         | Standard Name |
| YER143W                                          | DDI1          | YHR200W                 | RPN10         |
| YDR363W-A                                        | SEM1          | YDR289C                 | RTT103        |
| YMR231W                                          | PEP5          | YGL124C                 | MON1          |
| YBR195C                                          | MSI1          | YML102W                 | CAC2          |
| YKL126W                                          | YPK1          | YGL115W                 | SNF4          |
| YLR360W                                          | VPS38         | YGR133W                 | PEX4          |
| YDR484W                                          | VPS52         | YER139C                 | YER139C       |
| YGL212W                                          | VAM7          | YMR214W                 | SCJ1          |
| YPR084W                                          | YPR084W       | YKR030W                 | GMH1          |
| YGL115W                                          | SNF4          | YMR230W                 | RPS10B        |
| YBR200W                                          | BEM1          | YPL018W                 | CTF19         |
| YNL238W                                          | KEX2          | YGL124C                 | MON1          |
| YPR051W                                          | MAK3          | YEL043W                 | YEL043W       |
| YML071C                                          | COG8          | YNL127W                 | FAR11         |
| YDR202C                                          | RAV2          | YAR014C                 | BUD14         |
| YML103C                                          | NUP188        | YLR315W                 | NKP2          |
| YAL024C                                          | LTE1          | YDR261C                 | EXG2          |
| YPL024W                                          | RMI1          | YNL041C                 | COG6          |
| YFR032C-A                                        | RPL29         | YML117W                 | NAB6          |
| YDR484W                                          | VPS52         | YKR099W                 | BAS1          |
| YJL095W                                          | BCK1          | YMR230W                 | RPS10B        |
| YIL159W                                          | BNR1          | YPR119W                 | CLB2          |
| YDR293C                                          | SSD1          | YBR108W                 | YBR108W       |
| YFR010W                                          | UBP6          | YPR030W                 | CSR2          |
| YNL041C                                          | COG6          | YLR370C                 | ARC18         |
| YJL151C                                          | SNA3          | YNL238W                 | KEX2          |
| YLR313C                                          | SPH1          | YJL187C                 | SWE1          |
| YKL032C                                          | IXR1          | YPL256C                 | CLN2          |
| YDR183W                                          | PLP1          | YOL081W                 | IRA2          |

| Predictions at threshold level 0.75 continued... |               |                         |               |
|--------------------------------------------------|---------------|-------------------------|---------------|
| Gene1 of predicted pair                          |               | Gene2 of predicted pair |               |
| Systematic Name                                  | Standard Name | Systematic Name         | Standard Name |
| YOR023C                                          | AHC1          | YHR012W                 | VPS29         |
| YPR030W                                          | CSR2          | YBR019C                 | GAL10         |
| YCR065W                                          | HCM1          | YDR171W                 | HSP42         |
| YPL158C                                          | YPL158C       | YHL011C                 | PRS3          |
| YBR217W                                          | ATG12         | YJR056C                 | YJR056C       |
| YGR086C                                          | PIL1          | YOL100W                 | PKH2          |
| YBR108W                                          | YBR108W       | YDL083C                 | RPS16B        |
| YDR127W                                          | ARO1          | YPR119W                 | CLB2          |
| YGL087C                                          | MMS2          | YOR014W                 | RTS1          |
| YNL032W                                          | SIW14         | YOR066W                 | MSA1          |
| YDR443C                                          | SSN2          | YLR371W                 | ROM2          |
| YMR016C                                          | SOK2          | YDR484W                 | VPS52         |
| YLR381W                                          | CTF3          | YMR127C                 | SAS2          |
| YER162C                                          | RAD4          | YAR014C                 | BUD14         |
| YHR178W                                          | STB5          | YGL124C                 | MON1          |
| YGL153W                                          | PEX14         | YPL213W                 | LEA1          |
| YOR080W                                          | DIA2          | YDL226C                 | GCS1          |
| YGR072W                                          | UPF3          | YJL004C                 | SYS1          |
| YFR024C-A                                        | LSB3          | YBR239C                 | YBR239C       |
| YPL024W                                          | RMI1          | YDL184C                 | RPL41A        |
| YLR381W                                          | CTF3          | YHR013C                 | ARD1          |
| YDR080W                                          | VPS41         | YPL120W                 | VPS30         |
| YLR381W                                          | CTF3          | YGR270W                 | YTA7          |
| YLR399C                                          | BDF1          | YPR120C                 | CLB5          |
| YKL135C                                          | APL2          | YKR001C                 | VPS1          |
| YPR084W                                          | YPR084W       | YJL124C                 | LSM1          |
| YDR318W                                          | MCM21         | YLR233C                 | EST1          |
| YOR156C                                          | NFI1          | YGL003C                 | CDH1          |
| YGL054C                                          | ERV14         | YNR032W                 | PPG1          |

| Predictions at threshold level 0.75 continued... |               |                         |               |
|--------------------------------------------------|---------------|-------------------------|---------------|
| Gene1 of predicted pair                          |               | Gene2 of predicted pair |               |
| Systematic Name                                  | Standard Name | Systematic Name         | Standard Name |
| YNR072W                                          | HXT17         | YGL003C                 | CDH1          |
| YEL009C                                          | GCN4          | YCL010C                 | SGF29         |
| YNL106C                                          | INP52         | YLR386W                 | VAC14         |
| YER115C                                          | SPR6          | YKL117W                 | SBA1          |
| YJR140C                                          | HIR3          | YLR315W                 | NKP2          |
| YKL116C                                          | PRR1          | YBR030W                 | YBR030W       |
| YFR010W                                          | UBP6          | YKR035W-A               | DID2          |
| YLR090W                                          | XDJ1          | YOR270C                 | VPH1          |
| YBL047C                                          | EDE1          | YPL213W                 | LEA1          |
| YHR012W                                          | VPS29         | YAL002W                 | VPS8          |
| YBL058W                                          | SHP1          | YLR180W                 | SAM1          |
| YPL241C                                          | CIN2          | YGL190C                 | CDC55         |
| YKR020W                                          | VPS51         | YOL081W                 | IRA2          |
| YJL058C                                          | BIT61         | YKL114C                 | APN1          |
| YPL246C                                          | RBD2          | YLR144C                 | ACF2          |
| YGL174W                                          | BUD13         | YMR038C                 | CCS1          |
| YDR293C                                          | SSD1          | YHR012W                 | VPS29         |
| YGL078C                                          | DBP3          | YEL053C                 | MAK10         |
| YDL020C                                          | RPN4          | YKL080W                 | VMA5          |
| YGL212W                                          | VAM7          | YOL018C                 | TLG2          |
| YDR245W                                          | MNN10         | YMR311C                 | GLC8          |
| YGL054C                                          | ERV14         | YPR032W                 | SRO7          |
| YOR327C                                          | SNC2          | YLR398C                 | SKI2          |
| YMR216C                                          | SKY1          | YGL223C                 | COG1          |
| YOR132W                                          | VPS17         | YOR106W                 | VAM3          |
| YKR014C                                          | YPT52         | YJR084W                 | CSN12         |
| YER110C                                          | KAP123        | YFL047W                 | RGD2          |
| YIL076W                                          | SEC28         | YGR105W                 | VMA21         |
| YHR084W                                          | STE12         | YDR480W                 | DIG2          |

| Predictions at threshold level 0.75 continued... |               |                         |               |
|--------------------------------------------------|---------------|-------------------------|---------------|
| Gene1 of predicted pair                          |               | Gene2 of predicted pair |               |
| Systematic Name                                  | Standard Name | Systematic Name         | Standard Name |
| YNL297C                                          | MON2          | YER162C                 | RAD4          |
| YDR183W                                          | PLP1          | YOL054W                 | PSH1          |
| YMR055C                                          | BUB2          | YAR014C                 | BUD14         |
| YDL020C                                          | RPN4          | YCL037C                 | SRO9          |
| YGL003C                                          | CDH1          | YOL081W                 | IRA2          |
| YPR017C                                          | DSS4          | YMR004W                 | MVP1          |
| YDR439W                                          | LRS4          | YKL110C                 | KTI12         |
| YNL031C                                          | HHT2          | YKR048C                 | NAP1          |
| YMR216C                                          | SKY1          | YOR109W                 | INP53         |
| YIL076W                                          | SEC28         | YGL115W                 | SNF4          |
| YAL024C                                          | LTE1          | YDR484W                 | VPS52         |
| YOR332W                                          | VMA4          | YKL080W                 | VMA5          |
| YCR077C                                          | PAT1          | YPL256C                 | CLN2          |
| YNL025C                                          | SSN8          | YAL002W                 | VPS8          |
| YBL078C                                          | ATG8          | YOR327C                 | SNC2          |
| YKR099W                                          | BAS1          | YOL081W                 | IRA2          |
| YMR016C                                          | SOK2          | YOL121C                 | RPS19A        |
| YPL022W                                          | RAD1          | YBR200W                 | BEM1          |
| YGL025C                                          | PGD1          | YMR311C                 | GLC8          |
| YHR060W                                          | VMA22         | YJR033C                 | RAV1          |
| YDL149W                                          | ATG9          | YJR025C                 | BNA1          |
| YOR368W                                          | RAD17         | YOL081W                 | IRA2          |
| YFR010W                                          | UBP6          | YLR150W                 | STM1          |
| YOR124C                                          | UBP2          | YMR038C                 | CCS1          |
| YIL162W                                          | SUC2          | YGL226C-A               | OST5          |
| YBL103C                                          | RTG3          | YHR200W                 | RPN10         |
| YDR264C                                          | AKR1          | YBL087C                 | RPL23A        |
| YDR363W-A                                        | SEM1          | YKR048C                 | NAP1          |
| YKL139W                                          | CTK1          | YOR327C                 | SNC2          |

| Predictions at threshold level 0.75 continued... |               |                         |               |
|--------------------------------------------------|---------------|-------------------------|---------------|
| Gene1 of predicted pair                          |               | Gene2 of predicted pair |               |
| Systematic Name                                  | Standard Name | Systematic Name         | Standard Name |
| YCR063W                                          | BUD31         | YBR065C                 | ECM2          |
| YNL087W                                          | TCB2          | YLR398C                 | SKI2          |
| YFL023W                                          | BUD27         | YOR043W                 | WHI2          |
| YDL083C                                          | RPS16B        | YDR207C                 | UME6          |
| YLR018C                                          | POM34         | YGL200C                 | EMP24         |
| YLR119W                                          | SRN2          | YML001W                 | YPT7          |
| YOR109W                                          | INP53         | YML038C                 | YMD8          |
| YMR004W                                          | MVP1          | YGR105W                 | VMA21         |
| YHR039C-A                                        | VMA10         | YJR032W                 | CPR7          |
| YGR184C                                          | UBR1          | YPR046W                 | MCM16         |
| YJL187C                                          | SWE1          | YHR115C                 | DMA1          |
| YDR254W                                          | CHL4          | YDR144C                 | MKC7          |
| YBR171W                                          | SEC66         | YDR254W                 | CHL4          |
| YLR018C                                          | POM34         | YPL178W                 | CBC2          |
| YDR289C                                          | RTT103        | YJL183W                 | MNN11         |
| YLR399C                                          | BDF1          | YGR188C                 | BUB1          |
| YMR216C                                          | SKY1          | YDR207C                 | UME6          |
| YOR033C                                          | EXO1          | YBR228W                 | SLX1          |
| YDL155W                                          | CLB3          | YGL003C                 | CDH1          |
| YNL044W                                          | YIP3          | YNL238W                 | KEX2          |
| YDR477W                                          | SNF1          | YPL161C                 | BEM4          |
| YIL036W                                          | CST6          | YOR141C                 | ARP8          |
| YGL153W                                          | PEX14         | YBL047C                 | EDE1          |
| YHL020C                                          | OPI1          | YNL107W                 | YAF9          |
| YPL161C                                          | BEM4          | YNL116W                 | DMA2          |
| YGL253W                                          | HXK2          | YBR114W                 | RAD16         |
| YAL024C                                          | LTE1          | YPR030W                 | CSR2          |
| YKL025C                                          | PAN3          | YML095C                 | RAD10         |
| YHR158C                                          | KEL1          | YLR425W                 | TUS1          |

| Predictions at threshold level 0.75 continued... |               |                         |               |
|--------------------------------------------------|---------------|-------------------------|---------------|
| Gene1 of predicted pair                          |               | Gene2 of predicted pair |               |
| Systematic Name                                  | Standard Name | Systematic Name         | Standard Name |
| YLR386W                                          | VAC14         | YKR048C                 | NAP1          |
| YDR477W                                          | SNF1          | YKR099W                 | BAS1          |
| YER116C                                          | SLX8          | YJL124C                 | LSM1          |
| YMR153W                                          | NUP53         | YKR024C                 | DBP7          |
| YMR152W                                          | YIM1          | YMR214W                 | SCJ1          |
| YLR079W                                          | SIC1          | YJR135C                 | MCM22         |
| YKL139W                                          | CTK1          | YJL172W                 | CPS1          |
| YNR072W                                          | HXT17         | YER139C                 | YER139C       |
| YPL037C                                          | EGD1          | YHR200W                 | RPN10         |
| YNL291C                                          | MID1          | YPR032W                 | SRO7          |
| YDR378C                                          | LSM6          | YFR036W                 | CDC26         |
| YDR443C                                          | SSN2          | YIL038C                 | NOT3          |
| YAL024C                                          | LTE1          | YPL115C                 | BEM3          |
| YNL297C                                          | MON2          | YPL120W                 | VPS30         |
| YOR270C                                          | VPH1          | YER044C                 | ERG28         |
| YDR225W                                          | HTA1          | YGR252W                 | GCN5          |
| YPR051W                                          | MAK3          | YPL234C                 | TFP3          |
| YMR172W                                          | HOT1          | YPL018W                 | CTF19         |
| YOR327C                                          | SNC2          | YMR230W                 | RPS10B        |
| YJR060W                                          | CBF1          | YGL163C                 | RAD54         |
| YOR337W                                          | TEA1          | YPL057C                 | SUR1          |
| YNL106C                                          | INP52         | YBR200W                 | BEM1          |
| YLR381W                                          | CTF3          | YLR399C                 | BDF1          |
| YGR108W                                          | CLB1          | YHR114W                 | BZZ1          |
| YBR108W                                          | YBR108W       | YJR084W                 | CSN12         |
| YKR020W                                          | VPS51         | YER162C                 | RAD4          |
| YIL076W                                          | SEC28         | YKR030W                 | GMH1          |
| YDR477W                                          | SNF1          | YMR199W                 | CLN1          |
| YHR178W                                          | STB5          | YDR318W                 | MCM21         |

| Predictions at threshold level 0.75 continued... |               |                         |               |
|--------------------------------------------------|---------------|-------------------------|---------------|
| Gene1 of predicted pair                          |               | Gene2 of predicted pair |               |
| Systematic Name                                  | Standard Name | Systematic Name         | Standard Name |
| YLR102C                                          | APC9          | YKL101W                 | HSL1          |
| YOR112W                                          | CEX1          | YHR060W                 | VMA22         |
| YPR017C                                          | DSS4          | YDR320C                 | SWA2          |
| YDR202C                                          | RAV2          | YER120W                 | SCS2          |
| YPL096C-A                                        | ERI1          | YBL047C                 | EDE1          |
| YBR171W                                          | SEC66         | YNL058C                 | YNL058C       |
| YKL139W                                          | CTK1          | YEL060C                 | PRB1          |
| YGL025C                                          | PGD1          | YOR043W                 | WHI2          |
| YER075C                                          | PTP3          | YDL006W                 | PTC1          |
| YBR274W                                          | CHK1          | YGL148W                 | ARO2          |
| YPL050C                                          | MNN9          | YKL204W                 | EAP1          |
| YJL154C                                          | VPS35         | YMR199W                 | CLN1          |
| YIL036W                                          | CST6          | YGL163C                 | RAD54         |
| YDR335W                                          | MSN5          | YNL225C                 | CNM67         |
| YMR016C                                          | SOK2          | YHR081W                 | LRP1          |
| YEL053C                                          | MAK10         | YDR155C                 | CPR1          |
| YDR108W                                          | GSG1          | YJR032W                 | CPR7          |
| YJR090C                                          | GRR1          | YDR028C                 | REG1          |
| YJR060W                                          | CBF1          | YJL004C                 | SYS1          |
| YCR020C-A                                        | MAK31         | YML071C                 | COG8          |
| YDR378C                                          | LSM6          | YCR086W                 | CSM1          |
| YNL215W                                          | IES2          | YBR200W                 | BEM1          |
| YLR399C                                          | BDF1          | YLR315W                 | NKP2          |
| YHR039C-A                                        | VMA10         | YEL051W                 | VMA8          |
| YFR031C-A                                        | RPL2A         | YOR069W                 | VPS5          |
| YLR386W                                          | VAC14         | YDR439W                 | LRS4          |
| YBR030W                                          | YBR030W       | YPL037C                 | EGD1          |
| YLR090W                                          | XDJ1          | YBR019C                 | GAL10         |
| YNL291C                                          | MID1          | YDR080W                 | VPS41         |

| Predictions at threshold level 0.75 continued... |               |                         |               |
|--------------------------------------------------|---------------|-------------------------|---------------|
| Gene1 of predicted pair                          |               | Gene2 of predicted pair |               |
| Systematic Name                                  | Standard Name | Systematic Name         | Standard Name |
| YBL047C                                          | EDE1          | YHR200W                 | RPN10         |
| YDR225W                                          | HTA1          | YBR009C                 | HHF1          |
| YDR358W                                          | GGA1          | YML071C                 | COG8          |
| YML016C                                          | PPZ1          | YKL110C                 | KTI12         |
| YLR192C                                          | HCR1          | YAL002W                 | VPS8          |
| YHR216W                                          | IMD2          | YPR119W                 | CLB2          |
| YJL204C                                          | RCY1          | YJR090C                 | GRR1          |
| YGL066W                                          | SGF73         | YPL018W                 | CTF19         |
| YPR017C                                          | DSS4          | YGL223C                 | COG1          |
| YNL041C                                          | COG6          | YER162C                 | RAD4          |
| YLR240W                                          | VPS34         | YPR173C                 | VPS4          |
| YNL264C                                          | PDR17         | YML097C                 | VPS9          |
| YHR073W                                          | OSH3          | YPL256C                 | CLN2          |
| YJL151C                                          | SNA3          | YJL004C                 | SYS1          |
| YLR441C                                          | RPS1A         | YPR036W                 | VMA13         |
| YJR060W                                          | CBF1          | YDR207C                 | UME6          |
| YOR127W                                          | RGA1          | YLR381W                 | CTF3          |
| YBR171W                                          | SEC66         | YPR030W                 | CSR2          |
| YPR036W                                          | VMA13         | YMR038C                 | CCS1          |
| YNR023W                                          | SNF12         | YHL025W                 | SNF6          |
| YKL213C                                          | DOA1          | YDR289C                 | RTT103        |
| YDL020C                                          | RPN4          | YLR150W                 | STM1          |
| YLR386W                                          | VAC14         | YDR207C                 | UME6          |
| YGR019W                                          | UGA1          | YDR254W                 | CHL4          |
| YNL307C                                          | MCK1          | YPL137C                 | GIP3          |
| YMR198W                                          | CIK1          | YLR370C                 | ARC18         |
| YEL065W                                          | SIT1          | YER122C                 | GLO3          |
| YBR127C                                          | VMA2          | YMR055C                 | BUB2          |
| YHR200W                                          | RPN10         | YOL081W                 | IRA2          |



| Predictions at threshold level 0.75 continued... |               |                         |               |
|--------------------------------------------------|---------------|-------------------------|---------------|
| Gene1 of predicted pair                          |               | Gene2 of predicted pair |               |
| Systematic Name                                  | Standard Name | Systematic Name         | Standard Name |
| YPR051W                                          | MAK3          | YER120W                 | SCS2          |
| YKR001C                                          | VPS1          | YMR231W                 | PEP5          |
| YMR243C                                          | ZRC1          | YDR423C                 | CAD1          |
| YJR140C                                          | HIR3          | YJL124C                 | LSM1          |
| YKL048C                                          | ELM1          | YHR081W                 | LRP1          |
| YGL066W                                          | SGF73         | YDR363W-A               | SEM1          |
| YKL116C                                          | PRR1          | YLR386W                 | VAC14         |
| YPR018W                                          | RLF2          | YHR013C                 | ARD1          |
| YOL043C                                          | NTG2          | YMR167W                 | MLH1          |
| YOR069W                                          | VPS5          | YOR035C                 | SHE4          |
| YLR337C                                          | VRP1          | YER122C                 | GLO3          |
| YKL048C                                          | ELM1          | YCR053W                 | THR4          |
| YDL020C                                          | RPN4          | YGL124C                 | MON1          |
| YIL156W                                          | UBP7          | YGL016W                 | KAP122        |
| YLR447C                                          | VMA6          | YNL051W                 | COG5          |
| YMR164C                                          | MSS11         | YML057W                 | CMP2          |
| YLR090W                                          | XDJ1          | YMR133W                 | REC114        |
| YLR083C                                          | EMP70         | YER120W                 | SCS2          |
| YNL289W                                          | PCL1          | YJL187C                 | SWE1          |
| YMR016C                                          | SOK2          | YNL058C                 | YNL058C       |
| YNL297C                                          | MON2          | YCL001W                 | RER1          |
| YNL076W                                          | MKS1          | YCR053W                 | THR4          |
| YDL020C                                          | RPN4          | YDR363W-A               | SEM1          |
| YKL110C                                          | KTI12         | YAR014C                 | BUD14         |
| YBL017C                                          | PEP1          | YNL238W                 | KEX2          |
| YDL160C                                          | DHH1          | YPL203W                 | TPK2          |
| YDR293C                                          | SSD1          | YDR080W                 | VPS41         |
| YOR290C                                          | SNF2          | YLR094C                 | GIS3          |
| YOR043W                                          | WHI2          | YJR084W                 | CSN12         |

| Predictions at threshold level 0.75 continued... |               |                         |               |
|--------------------------------------------------|---------------|-------------------------|---------------|
| Gene1 of predicted pair                          |               | Gene2 of predicted pair |               |
| Systematic Name                                  | Standard Name | Systematic Name         | Standard Name |
| YDR320C                                          | SWA2          | YHL020C                 | OPI1          |
| YCL067C                                          | HMLALPHA2     | YGL025C                 | PGD1          |
| YNL069C                                          | RPL16B        | YNL041C                 | COG6          |
| YLR320W                                          | MMS22         | YPL137C                 | GIP3          |
| YGL078C                                          | DBP3          | YBR173C                 | UMP1          |
| YFR010W                                          | UBP6          | YMR276W                 | DSK2          |
| YLR288C                                          | MEC3          | YGL250W                 | RMR1          |
| YBR200W                                          | BEM1          | YGL212W                 | VAM7          |
| YNL079C                                          | TPM1          | YHL011C                 | PRS3          |
| YMR095C                                          | SNO1          | YLR370C                 | ARC18         |
| YEL044W                                          | IES6          | YGR135W                 | PRE9          |
| YNL206C                                          | RTT106        | YDR507C                 | GIN4          |
| YIR009W                                          | MSL1          | YPL213W                 | LEA1          |
| YBR030W                                          | YBR030W       | YLR452C                 | SST2          |
| YNL297C                                          | MON2          | YDR469W                 | SDC1          |
| YDL020C                                          | RPN4          | YHR178W                 | STB5          |
| YCL001W                                          | RER1          | YAL007C                 | ERP2          |
| YPL001W                                          | HAT1          | YBR215W                 | HPC2          |
| YLR410W                                          | VIP1          | YDR318W                 | MCM21         |
| YPR072W                                          | NOT5          | YBR010W                 | HHT1          |
| YOR141C                                          | ARP8          | YDL047W                 | SIT4          |
| YFR034C                                          | PHO4          | YPL248C                 | GAL4          |
| YIL053W                                          | RHR2          | YIL076W                 | SEC28         |
| YMR224C                                          | MRE11         | YDR245W                 | MNN10         |
| YNL291C                                          | MID1          | YOR014W                 | RTS1          |
| YDR137W                                          | RGP1          | YKL119C                 | VPH2          |
| YJL172W                                          | CPS1          | YPR046W                 | MCM16         |
| YDR192C                                          | NUP42         | YDR335W                 | MSN5          |
| YNL218W                                          | MGS1          | YFR010W                 | UBP6          |

| Predictions at threshold level 0.75 continued... |               |                         |               |
|--------------------------------------------------|---------------|-------------------------|---------------|
| Gene1 of predicted pair                          |               | Gene2 of predicted pair |               |
| Systematic Name                                  | Standard Name | Systematic Name         | Standard Name |
| YIL076W                                          | SEC28         | YDL192W                 | ARF1          |
| YMR026C                                          | PEX12         | YDL065C                 | PEX19         |
| YML115C                                          | VAN1          | YEL053C                 | MAK10         |
| YML016C                                          | PPZ1          | YDR254W                 | CHL4          |
| YDR245W                                          | MNN10         | YEL036C                 | ANP1          |
| YLR079W                                          | SIC1          | YPL018W                 | CTF19         |
| YBR228W                                          | SLX1          | YBL079W                 | NUP170        |
| YOR243C                                          | PUS7          | YPL079W                 | RPL21B        |
| YML088W                                          | UFO1          | YJR090C                 | GRR1          |
| YAL024C                                          | LTE1          | YNR072W                 | HXT17         |
| YFR031C-A                                        | RPL2A         | YLR398C                 | SKI2          |
| YKL139W                                          | CTK1          | YNL087W                 | TCB2          |
| YGR270W                                          | YTA7          | YER161C                 | SPT2          |
| YER047C                                          | SAP1          | YER161C                 | SPT2          |
| YCR034W                                          | FEN1          | YMR055C                 | BUB2          |
| YPR084W                                          | YPR084W       | YOR106W                 | VAM3          |
| YJL095W                                          | BCK1          | YBR114W                 | RAD16         |
| YNR052C                                          | POP2          | YJR135C                 | MCM22         |
| YPL115C                                          | BEM3          | YOR023C                 | AHC1          |
| YLR385C                                          | SWC7          | YNL107W                 | YAF9          |
| YBR217W                                          | ATG12         | YFR036W                 | CDC26         |
| YER116C                                          | SLX8          | YLR452C                 | SST2          |
| YBR171W                                          | SEC66         | YDR309C                 | GIC2          |
| YHR156C                                          | LIN1          | YNR072W                 | HXT17         |
| YDR484W                                          | VPS52         | YBR280C                 | SAF1          |
| YNL087W                                          | TCB2          | YFL023W                 | BUD27         |
| YPR084W                                          | YPR084W       | YJL004C                 | SYS1          |
| YGL151W                                          | NUT1          | YOR368W                 | RAD17         |
| YPL253C                                          | VIK1          | YPL161C                 | BEM4          |

| Predictions at threshold level 0.75 continued... |               |                         |               |
|--------------------------------------------------|---------------|-------------------------|---------------|
| Gene1 of predicted pair                          |               | Gene2 of predicted pair |               |
| Systematic Name                                  | Standard Name | Systematic Name         | Standard Name |
| YBR030W                                          | YBR030W       | YPL161C                 | BEM4          |
| YLR240W                                          | VPS34         | YHR161C                 | YAP1801       |
| YFR010W                                          | UBP6          | YNL238W                 | KEX2          |
| YAL031C                                          | GIP4          | YCL027W                 | FUS1          |
| YPL161C                                          | BEM4          | YBR260C                 | RGD1          |
| YDL059C                                          | RAD59         | YJR090C                 | GRR1          |
| YDR469W                                          | SDC1          | YBR036C                 | CSG2          |
| YKL139W                                          | CTK1          | YDR137W                 | RGP1          |
| YCR088W                                          | ABP1          | YJL095W                 | BCK1          |
| YHR171W                                          | ATG7          | YNR007C                 | ATG3          |
| YDR171W                                          | HSP42         | YPL106C                 | SSE1          |
| YDR156W                                          | RPA14         | YBR131W                 | CCZ1          |
| YNL117W                                          | MLS1          | YMR038C                 | CCS1          |
| YLR386W                                          | VAC14         | YBL025W                 | RRN10         |
| YKL048C                                          | ELM1          | YNL107W                 | YAF9          |
| YOR035C                                          | SHE4          | YBL025W                 | RRN10         |
| YJL036W                                          | SNX4          | YDR310C                 | SUM1          |
| YER096W                                          | SHC1          | YNL079C                 | TPM1          |
| YGL053W                                          | PRM8          | YAR031W                 | PRM9          |
| YPL129W                                          | TAF14         | YGL151W                 | NUT1          |
| YOR337W                                          | TEA1          | YLR398C                 | SKI2          |
| YLR090W                                          | XDJ1          | YKL048C                 | ELM1          |
| YNL248C                                          | RPA49         | YIL103W                 | DPH1          |
| YJR032W                                          | CPR7          | YOR327C                 | SNC2          |
| YPL050C                                          | MNN9          | YLR093C                 | NYV1          |
| YBR111W-A                                        | SUS1          | YPL181W                 | CTI6          |
| YNL025C                                          | SSN8          | YPL057C                 | SUR1          |
| YMR198W                                          | CIK1          | YLR410W                 | VIP1          |
| YGR217W                                          | CCH1          | YBL101C                 | ECM21         |

| Predictions at threshold level 0.75 continued... |               |                         |               |
|--------------------------------------------------|---------------|-------------------------|---------------|
| Gene1 of predicted pair                          |               | Gene2 of predicted pair |               |
| Systematic Name                                  | Standard Name | Systematic Name         | Standard Name |
| YCL001W                                          | RER1          | YER122C                 | GLO3          |
| YLR240W                                          | VPS34         | YBR128C                 | ATG14         |
| YDR245W                                          | MNN10         | YDL155W                 | CLB3          |
| YMR224C                                          | MRE11         | YLL039C                 | UBI4          |
| YBL047C                                          | EDE1          | YIL008W                 | URM1          |
| YDR507C                                          | GIN4          | YNL166C                 | BNI5          |
| YDR293C                                          | SSD1          | YPL234C                 | TFP3          |
| YNL215W                                          | IES2          | YNL107W                 | YAF9          |
| YJL124C                                          | LSM1          | YKL160W                 | ELF1          |
| YKR020W                                          | VPS51         | YPR032W                 | SRO7          |
| YDR129C                                          | SAC6          | YBR057C                 | MUM2          |
| YDR378C                                          | LSM6          | YAR014C                 | BUD14         |
| YPL037C                                          | EGD1          | YER122C                 | GLO3          |
| YGR063C                                          | SPT4          | YBR089C-A               | NHP6B         |
| YBR030W                                          | YBR030W       | YER144C                 | UBP5          |
| YPR051W                                          | MAK3          | YJL004C                 | SYS1          |
| YOL112W                                          | MSB4          | YAL030W                 | SNC1          |
| YDR335W                                          | MSN5          | YLR315W                 | NKP2          |
| YBR278W                                          | DPB3          | YDR289C                 | RTT103        |
| YLR083C                                          | EMP70         | YIL076W                 | SEC28         |
| YBR217W                                          | ATG12         | YMR159C                 | ATG16         |
| YGR261C                                          | APL6          | YDR310C                 | SUM1          |
| YMR172W                                          | HOT1          | YNL166C                 | BNI5          |
| YGL212W                                          | VAM7          | YEL043W                 | YEL043W       |
| YBL058W                                          | SHP1          | YLR093C                 | NYV1          |
| YPL024W                                          | RMI1          | YDL154W                 | MSH5          |
| YDL160C                                          | DHH1          | YPL022W                 | RAD1          |
| YPR084W                                          | YPR084W       | YEL053C                 | MAK10         |
| YGR104C                                          | SRB5          | YOR124C                 | UBP2          |

| Predictions at threshold level 0.75 continued... |               |                         |               |
|--------------------------------------------------|---------------|-------------------------|---------------|
| Gene1 of predicted pair                          |               | Gene2 of predicted pair |               |
| Systematic Name                                  | Standard Name | Systematic Name         | Standard Name |
| YDR225W                                          | HTA1          | YHR013C                 | ARD1          |
| YLR262C                                          | YPT6          | YHR098C                 | SFB3          |
| YLR337C                                          | VRP1          | YHL002W                 | HSE1          |
| YIL034C                                          | CAP2          | YHR111W                 | UBA4          |
| YLR381W                                          | CTF3          | YDL185W                 | TFP1          |
| YBR173C                                          | UMP1          | YPR030W                 | CSR2          |
| YFR031C-A                                        | RPL2A         | YER044C                 | ERG28         |
| YDR320C                                          | SWA2          | YEL043W                 | YEL043W       |
| YJL036W                                          | SNX4          | YPL120W                 | VPS30         |
| YOR337W                                          | TEA1          | YDL083C                 | RPS16B        |
| YOR043W                                          | WHI2          | YJL095W                 | BCK1          |
| YDL089W                                          | YDL089W       | YCR086W                 | CSM1          |
| YCR020C-A                                        | MAK31         | YER120W                 | SCS2          |
| YGR249W                                          | MGA1          | YMR133W                 | REC114        |
| YML071C                                          | COG8          | YPL195W                 | APL5          |
| YKR028W                                          | SAP190        | YER033C                 | ZRG8          |
| YDL052C                                          | SLC1          | YMR313C                 | TGL3          |
| YKL007W                                          | CAP1          | YJL154C                 | VPS35         |
| YJL204C                                          | RCY1          | YGL198W                 | YIP4          |
| YCL032W                                          | STE50         | YMR273C                 | ZDS1          |
| YPL115C                                          | BEM3          | YJL190C                 | RPS22A        |
| YBR108W                                          | YBR108W       | YPL057C                 | SUR1          |
| YBL103C                                          | RTG3          | YPR030W                 | CSR2          |
| YGR108W                                          | CLB1          | YOR080W                 | DIA2          |
| YDR004W                                          | RAD57         | YGL003C                 | CDH1          |
| YFL013C                                          | IES1          | YIR005W                 | IST3          |
| YDR137W                                          | RGP1          | YCR077C                 | PAT1          |
| YLR441C                                          | RPS1A         | YPL137C                 | GIP3          |
| YHR012W                                          | VPS29         | YPL120W                 | VPS30         |

| Predictions at threshold level 0.75 continued... |               |                         |               |
|--------------------------------------------------|---------------|-------------------------|---------------|
| Gene1 of predicted pair                          |               | Gene2 of predicted pair |               |
| Systematic Name                                  | Standard Name | Systematic Name         | Standard Name |
| YDR129C                                          | SAC6          | YDR207C                 | UME6          |
| YML102W                                          | CAC2          | YPL256C                 | CLN2          |
| YEL053C                                          | MAK10         | YPL195W                 | APL5          |
| YPR051W                                          | MAK3          | YPL037C                 | EGD1          |
| YOR132W                                          | VPS17         | YOR069W                 | VPS5          |
| YKR061W                                          | KTR2          | YGL163C                 | RAD54         |
| YBR200W                                          | BEM1          | YML095C                 | RAD10         |
| YHR200W                                          | RPN10         | YHR115C                 | DMA1          |
| YDR443C                                          | SSN2          | YBR030W                 | YBR030W       |
| YLR399C                                          | BDF1          | YGR252W                 | GCN5          |
| YDR477W                                          | SNF1          | YKL126W                 | YPK1          |
| YPR036W                                          | VMA13         | YDL192W                 | ARF1          |
| YKL139W                                          | CTK1          | YIL103W                 | DPH1          |
| YJR056C                                          | YJR056C       | YJL095W                 | BCK1          |
| YIL148W                                          | RPL40A        | YMR153W                 | NUP53         |
| YNL106C                                          | INP52         | YNL230C                 | ELA1          |
| YOR039W                                          | CKB2          | YJL095W                 | BCK1          |
| YLR381W                                          | CTF3          | YPL018W                 | CTF19         |
| YNL025C                                          | SSN8          | YER068W                 | MOT2          |
| YLR447C                                          | VMA6          | YJR135C                 | MCM22         |
| YCL037C                                          | SRO9          | YEL043W                 | YEL043W       |
| YER162C                                          | RAD4          | YOR327C                 | SNC2          |
| YPR052C                                          | NHP6A         | YGL071W                 | AFT1          |
| YOR327C                                          | SNC2          | YDL192W                 | ARF1          |
| YKR101W                                          | SIR1          | YML109W                 | ZDS2          |
| YML103C                                          | NUP188        | YER110C                 | KAP123        |
| YLR425W                                          | TUS1          | YKL041W                 | VPS24         |
| YMR224C                                          | MRE11         | YLR313C                 | SPH1          |
| YDR146C                                          | SWI5          | YLR131C                 | ACE2          |

| Predictions at threshold level 0.75 continued... |               |                         |               |
|--------------------------------------------------|---------------|-------------------------|---------------|
| Gene1 of predicted pair                          |               | Gene2 of predicted pair |               |
| Systematic Name                                  | Standard Name | Systematic Name         | Standard Name |
| YEL043W                                          | YEL043W       | YML001W                 | YPT7          |
| YMR116C                                          | ASC1          | YPL161C                 | BEM4          |
| YGL178W                                          | MPT5          | YDR448W                 | ADA2          |
| YLR095C                                          | IOC2          | YLR180W                 | SAM1          |
| YDR358W                                          | GGA1          | YKL041W                 | VPS24         |
| YER116C                                          | SLX8          | YGL115W                 | SNF4          |
| YPL042C                                          | SSN3          | YBR258C                 | SHG1          |
| YPL024W                                          | RMI1          | YOR001W                 | RRP6          |
| YBL103C                                          | RTG3          | YGL124C                 | MON1          |
| YLR094C                                          | GIS3          | YDR261C                 | EXG2          |
| YDL223C                                          | HBT1          | YPL161C                 | BEM4          |
| YMR214W                                          | SCJ1          | YER040W                 | GLN3          |
| YBR057C                                          | MUM2          | YBR107C                 | IML3          |
| YBR108W                                          | YBR108W       | YML071C                 | COG8          |
| YOR001W                                          | RRP6          | YHR167W                 | THP2          |
| YDL083C                                          | RPS16B        | YLR370C                 | ARC18         |
| YJR058C                                          | APS2          | YAL030W                 | SNC1          |
| YML115C                                          | VAN1          | YGR135W                 | PRE9          |
| YMR109W                                          | MYO5          | YPL018W                 | CTF19         |
| YJR060W                                          | CBF1          | YJR035W                 | RAD26         |
| YDR378C                                          | LSM6          | YFR030W                 | MET10         |
| YLR360W                                          | VPS38         | YBR181C                 | RPS6B         |
| YPL106C                                          | SSE1          | YJR035W                 | RAD26         |
| YDL160C                                          | DHH1          | YJL164C                 | TPK1          |
| YPL022W                                          | RAD1          | YML028W                 | TSA1          |
| YOR132W                                          | VPS17         | YOL018C                 | TLG2          |
| YNL307C                                          | MCK1          | YCR053W                 | THR4          |
| YMR055C                                          | BUB2          | YOR368W                 | RAD17         |
| YCL032W                                          | STE50         | YMR139W                 | RIM11         |



| Predictions at threshold level 0.75 continued... |               |                         |               |
|--------------------------------------------------|---------------|-------------------------|---------------|
| Gene1 of predicted pair                          |               | Gene2 of predicted pair |               |
| Systematic Name                                  | Standard Name | Systematic Name         | Standard Name |
| YIL036W                                          | CST6          | YCR086W                 | CSM1          |
| YBR200W                                          | BEM1          | YDL192W                 | ARF1          |
| YDR293C                                          | SSD1          | YNL041C                 | COG6          |
| YBR194W                                          | SOY1          | YHR167W                 | THP2          |
| YKR072C                                          | SIS2          | YOL030W                 | GAS5          |
| YGL147C                                          | RPL9A         | YBR217W                 | ATG12         |
| YDL161W                                          | ENT1          | YBR083W                 | TEC1          |
| YMR055C                                          | BUB2          | YGL252C                 | RTG2          |
| YBR217W                                          | ATG12         | YJL172W                 | CPS1          |
| YIL076W                                          | SEC28         | YDR153C                 | ENT5          |
| YHR156C                                          | LIN1          | YHR060W                 | VMA22         |
| YML115C                                          | VAN1          | YPR036W                 | VMA13         |
| YLR119W                                          | SRN2          | YDL184C                 | RPL41A        |
| YCR039C                                          | MATALPHA2     | YMR042W                 | ARG80         |
| YGR104C                                          | SRB5          | YLR357W                 | RSC2          |
| YNL288W                                          | CAF40         | YHR111W                 | UBA4          |
| YPL022W                                          | RAD1          | YLR058C                 | SHM2          |
| YNR072W                                          | HXT17         | YLR398C                 | SKI2          |
| YJL124C                                          | LSM1          | YOR308C                 | SNU66         |
| YCR024C-A                                        | PMP1          | YMR199W                 | CLN1          |
| YLR452C                                          | SST2          | YNL238W                 | KEX2          |
| YEL065W                                          | SIT1          | YLR398C                 | SKI2          |
| YPL115C                                          | BEM3          | YMR109W                 | MYO5          |
| YNL325C                                          | FIG4          | YLR452C                 | SST2          |
| YMR276W                                          | DSK2          | YOR124C                 | UBP2          |
| YML115C                                          | VAN1          | YPR030W                 | CSR2          |
| YLR150W                                          | STM1          | YMR055C                 | BUB2          |
| YDL020C                                          | RPN4          | YCR086W                 | CSM1          |
| YDR443C                                          | SSN2          | YIL053W                 | RHR2          |

| Predictions at threshold level 0.75 continued... |               |                         |               |
|--------------------------------------------------|---------------|-------------------------|---------------|
| Gene1 of predicted pair                          |               | Gene2 of predicted pair |               |
| Systematic Name                                  | Standard Name | Systematic Name         | Standard Name |
| YML103C                                          | NUP188        | YBR107C                 | IML3          |
| YPL018W                                          | CTF19         | YLR370C                 | ARC18         |
| YPL195W                                          | APL5          | YJR084W                 | CSN12         |
| YLR102C                                          | APC9          | YOR275C                 | RIM20         |
| YOL111C                                          | MDY2          | YMR230W                 | RPS10B        |
| YER110C                                          | KAP123        | YKL117W                 | SBA1          |
| YBR041W                                          | FAT1          | YKL140W                 | TGL1          |
| YGR019W                                          | UGA1          | YHR111W                 | UBA4          |
| YBL078C                                          | ATG8          | YLR093C                 | NYV1          |
| YPR036W                                          | VMA13         | YGL025C                 | PGD1          |
| YIL034C                                          | CAP2          | YDR289C                 | RTT103        |
| YOR195W                                          | SLK19         | YGR135W                 | PRE9          |
| YOL012C                                          | HTZ1          | YBR089C-A               | NHP6B         |
| YPL042C                                          | SSN3          | YJR140C                 | HIR3          |
| YDL020C                                          | RPN4          | YHR013C                 | ARD1          |
| YJL154C                                          | VPS35         | YJL190C                 | RPS22A        |
| YLR018C                                          | POM34         | YAL055W                 | PEX22         |
| YOR290C                                          | SNF2          | YBR289W                 | SNF5          |
| YLR320W                                          | MMS22         | YGL003C                 | CDH1          |
| YBL047C                                          | EDE1          | YPL158C                 | YPL158C       |
| YMR172W                                          | HOT1          | YER110C                 | KAP123        |
| YDR202C                                          | RAV2          | YGR020C                 | VMA7          |
| YLR083C                                          | EMP70         | YOR132W                 | VPS17         |
| YLL039C                                          | UBI4          | YOL081W                 | IRA2          |
| YHR200W                                          | RPN10         | YOR213C                 | SAS5          |
| YGL003C                                          | CDH1          | YOL091W                 | SPO21         |
| YOL111C                                          | MDY2          | YJL095W                 | BCK1          |
| YDL155W                                          | CLB3          | YAL002W                 | VPS8          |
| YGL161C                                          | YIP5          | YDL002C                 | NHP10         |

| Predictions at threshold level 0.75 continued... |               |                         |               |
|--------------------------------------------------|---------------|-------------------------|---------------|
| Gene1 of predicted pair                          |               | Gene2 of predicted pair |               |
| Systematic Name                                  | Standard Name | Systematic Name         | Standard Name |
| YOR127W                                          | RGA1          | YGR014W                 | MSB2          |
| YBR030W                                          | YBR030W       | YNL032W                 | SIW14         |
| YNL025C                                          | SSN8          | YPL042C                 | SSN3          |
| YCR020C-A                                        | MAK31         | YOR106W                 | VAM3          |
| YML019W                                          | OST6          | YEL036C                 | ANP1          |
| YML103C                                          | NUP188        | YLR381W                 | CTF3          |
| YLR150W                                          | STM1          | YDR076W                 | RAD55         |
| YPL045W                                          | VPS16         | YGL095C                 | VPS45         |
| YDR293C                                          | SSD1          | YPL161C                 | BEM4          |
| YNL307C                                          | MCK1          | YLR315W                 | NKP2          |
| YBR200W                                          | BEM1          | YGL237C                 | HAP2          |
| YHR205W                                          | SCH9          | YPL256C                 | CLN2          |
| YLR094C                                          | GIS3          | YLR371W                 | ROM2          |
| YDR358W                                          | GGA1          | YDR310C                 | SUM1          |
| YJL124C                                          | LSM1          | YOR124C                 | UBP2          |
| YAR014C                                          | BUD14         | YPR032W                 | SRO7          |
| YNL215W                                          | IES2          | YHR115C                 | DMA1          |
| YNL248C                                          | RPA49         | YDR254W                 | CHL4          |
| YLR360W                                          | VPS38         | YNL291C                 | MID1          |
| YOR038C                                          | HIR2          | YEL056W                 | HAT2          |
| YGL161C                                          | YIP5          | YKL032C                 | IXR1          |
| YJL117W                                          | PHO86         | YBR082C                 | UBC4          |
| YGL087C                                          | MMS2          | YNL291C                 | MID1          |
| YLL042C                                          | ATG10         | YMR159C                 | ATG16         |
| YOR212W                                          | STE4          | YMR139W                 | RIM11         |
| YOR337W                                          | TEA1          | YKR035W-A               | DID2          |
| YJL084C                                          | ALY2          | YIL050W                 | PCL7          |
| YGL033W                                          | HOP2          | YLR386W                 | VAC14         |
| YDR156W                                          | RPA14         | YOL081W                 | IRA2          |

| Predictions at threshold level 0.75 continued... |               |                         |               |
|--------------------------------------------------|---------------|-------------------------|---------------|
| Gene1 of predicted pair                          |               | Gene2 of predicted pair |               |
| Systematic Name                                  | Standard Name | Systematic Name         | Standard Name |
| YHR178W                                          | STB5          | YPR046W                 | MCM16         |
| YDL002C                                          | NHP10         | YMR038C                 | CCS1          |
| YFR010W                                          | UBP6          | YJL183W                 | MNN11         |
| YDR129C                                          | SAC6          | YOR035C                 | SHE4          |
| YNL288W                                          | CAF40         | YLR386W                 | VAC14         |
| YJR056C                                          | YJR056C       | YPL161C                 | BEM4          |
| YDR320C                                          | SWA2          | YNL041C                 | COG6          |
| YER161C                                          | SPT2          | YBR010W                 | HHT1          |
| YML058W                                          | SML1          | YDL059C                 | RAD59         |
| YLR398C                                          | SKI2          | YEL060C                 | PRB1          |
| YBR173C                                          | UMP1          | YGL212W                 | VAM7          |
| YMR273C                                          | ZDS1          | YHR167W                 | THP2          |
| YER161C                                          | SPT2          | YBR036C                 | CSG2          |
| YPL089C                                          | RLM1          | YBR082C                 | UBC4          |
| YJL176C                                          | SWI3          | YBR181C                 | RPS6B         |
| YMR216C                                          | SKY1          | YAR014C                 | BUD14         |
| YNL025C                                          | SSN8          | YDR448W                 | ADA2          |
| YBL008W                                          | HIR1          | YOR001W                 | RRP6          |
| YNL215W                                          | IES2          | YML097C                 | VPS9          |
| YJL053W                                          | PEP8          | YOL108C                 | INO4          |
| YER144C                                          | UBP5          | YMR214W                 | SCJ1          |
| YPR051W                                          | MAK3          | YNL051W                 | COG5          |
| YKL032C                                          | IXR1          | YDR378C                 | LSM6          |
| YMR261C                                          | TPS3          | YFL033C                 | RIM15         |
| YMR153W                                          | NUP53         | YLR320W                 | MMS22         |
| YBL051C                                          | PIN4          | YDR289C                 | RTT103        |
| YHR081W                                          | LRP1          | YDL192W                 | ARF1          |
| YGL054C                                          | ERV14         | YHR039C-A               | VMA10         |
| YHL031C                                          | GOS1          | YBR131W                 | CCZ1          |

| Predictions at threshold level 0.75 continued... |               |                         |               |
|--------------------------------------------------|---------------|-------------------------|---------------|
| Gene1 of predicted pair                          |               | Gene2 of predicted pair |               |
| Systematic Name                                  | Standard Name | Systematic Name         | Standard Name |
| YOR140W                                          | SFL1          | YPL203W                 | TPK2          |
| YOR213C                                          | SAS5          | YAL002W                 | VPS8          |
| YOR231W                                          | MKK1          | YJL095W                 | BCK1          |
| YJL157C                                          | FAR1          | YJR086W                 | STE18         |
| YNL206C                                          | RTT106        | YGL031C                 | RPL24A        |
| YHR060W                                          | VMA22         | YJL183W                 | MNN11         |
| YBR171W                                          | SEC66         | YNL307C                 | MCK1          |
| YMR004W                                          | MVP1          | YPL161C                 | BEM4          |
| YGL147C                                          | RPL9A         | YLR452C                 | SST2          |
| YDR202C                                          | RAV2          | YJR060W                 | CBF1          |
| YNL135C                                          | FPR1          | YIL133C                 | RPL16A        |
| YDL002C                                          | NHP10         | YMR055C                 | BUB2          |
| YDR363W-A                                        | SEM1          | YHR111W                 | UBA4          |
| YNL215W                                          | IES2          | YER139C                 | YER139C       |
| YIL076W                                          | SEC28         | YDR202C                 | RAV2          |
| YDR440W                                          | DOT1          | YLR370C                 | ARC18         |
| YNL087W                                          | TCB2          | YNR072W                 | HXT17         |
| YPR051W                                          | MAK3          | YJR032W                 | CPR7          |
| YFR032C-A                                        | RPL29         | YJL095W                 | BCK1          |
| YDL006W                                          | PTC1          | YJL183W                 | MNN11         |
| YMR224C                                          | MRE11         | YJR032W                 | CPR7          |
| YGR270W                                          | YTA7          | YAR014C                 | BUD14         |
| YDL116W                                          | NUP84         | YNL215W                 | IES2          |
| YDL077C                                          | VAM6          | YDR153C                 | ENT5          |
| YPR072W                                          | NOT5          | YPL248C                 | GAL4          |
| YDR245W                                          | MNN10         | YKL204W                 | EAP1          |
| YIL034C                                          | CAP2          | YNL135C                 | FPR1          |
| YDR202C                                          | RAV2          | YKR020W                 | VPS51         |
| YKR059W                                          | TIF1          | YKL101W                 | HSL1          |

| Predictions at threshold level 0.75 continued... |               |                         |               |
|--------------------------------------------------|---------------|-------------------------|---------------|
| Gene1 of predicted pair                          |               | Gene2 of predicted pair |               |
| Systematic Name                                  | Standard Name | Systematic Name         | Standard Name |
| YOR191W                                          | RIS1          | YNL106C                 | INP52         |
| YNL068C                                          | FKH2          | YHR111W                 | UBA4          |
| YOR337W                                          | TEA1          | YGL003C                 | CDH1          |
| YFR036W                                          | CDC26         | YOL081W                 | IRA2          |
| YKL110C                                          | KTI12         | YIR005W                 | IST3          |
| YJL004C                                          | SYS1          | YOL108C                 | INO4          |
| YLR441C                                          | RPS1A         | YNL238W                 | KEX2          |
| YDR245W                                          | MNN10         | YOR008C                 | SLG1          |
| YGR072W                                          | UPF3          | YGL115W                 | SNF4          |
| YEL044W                                          | IES6          | YKR020W                 | VPS51         |
| YNL325C                                          | FIG4          | YNL041C                 | COG6          |
| YPL037C                                          | EGD1          | YLR371W                 | ROM2          |
| YAR014C                                          | BUD14         | YOL108C                 | INO4          |
| YML001W                                          | YPT7          | YOR327C                 | SNC2          |
| YJL029C                                          | VPS53         | YLR396C                 | VPS33         |
| YDR245W                                          | MNN10         | YER161C                 | SPT2          |
| YPL240C                                          | HSP82         | YHR072W-A               | NOP10         |
| YBL051C                                          | PIN4          | YBR114W                 | RAD16         |
| YHR156C                                          | LIN1          | YMR153W                 | NUP53         |
| YJL053W                                          | PEP8          | YDR323C                 | PEP7          |
| YJL176C                                          | SWI3          | YBR042C                 | CST26         |
| YHL031C                                          | GOS1          | YOR106W                 | VAM3          |
| YER096W                                          | SHC1          | YER049W                 | TPA1          |
| YLR148W                                          | PEP3          | YDR129C                 | SAC6          |
| YDL116W                                          | NUP84         | YDR192C                 | NUP42         |
| YML097C                                          | VPS9          | YLR398C                 | SKI2          |
| YML115C                                          | VAN1          | YPL253C                 | VIK1          |
| YOL090W                                          | MSH2          | YNL082W                 | PMS1          |
| YER162C                                          | RAD4          | YDR207C                 | UME6          |

| Predictions at threshold level 0.75 continued... |               |                         |               |
|--------------------------------------------------|---------------|-------------------------|---------------|
| Gene1 of predicted pair                          |               | Gene2 of predicted pair |               |
| Systematic Name                                  | Standard Name | Systematic Name         | Standard Name |
| YNL058C                                          | YNL058C       | YOL111C                 | MDY2          |
| YDR245W                                          | MNN10         | YBR195C                 | MSI1          |
| YMR127C                                          | SAS2          | YNL107W                 | YAF9          |
| YLL007C                                          | YLL007C       | YPL161C                 | BEM4          |
| YGR105W                                          | VMA21         | YER162C                 | RAD4          |
| YPL022W                                          | RAD1          | YPR046W                 | MCM16         |
| YLR447C                                          | VMA6          | YKL119C                 | VPH2          |
| YJR024C                                          | MDE1          | YML103C                 | NUP188        |
| YER116C                                          | SLX8          | YLR371W                 | ROM2          |
| YKL139W                                          | CTK1          | YER162C                 | RAD4          |
| YLR425W                                          | TUS1          | YOL081W                 | IRA2          |
| YBL058W                                          | SHP1          | YHR200W                 | RPN10         |
| YNL106C                                          | INP52         | YDR389W                 | SAC7          |
| YLR386W                                          | VAC14         | YKL126W                 | YPK1          |
| YJL036W                                          | SNX4          | YGL054C                 | ERV14         |
| YPL115C                                          | BEM3          | YDL020C                 | RPN4          |
| YMR216C                                          | SKY1          | YGL054C                 | ERV14         |
| YLR095C                                          | IOC2          | YDL192W                 | ARF1          |
| YHL002W                                          | HSE1          | YKL041W                 | VPS24         |
| YNL291C                                          | MID1          | YPL018W                 | CTF19         |
| YJL053W                                          | PEP8          | YPR051W                 | MAK3          |
| YIL034C                                          | CAP2          | YKL048C                 | ELM1          |
| YOR069W                                          | VPS5          | YJL204C                 | RCY1          |
| YDL116W                                          | NUP84         | YML057W                 | CMP2          |
| YCR077C                                          | PAT1          | YHL002W                 | HSE1          |
| YGR159C                                          | NSR1          | YHR052W                 | CIC1          |
| YEL053C                                          | MAK10         | YOR035C                 | SHE4          |
| YJL176C                                          | SWI3          | YKL139W                 | CTK1          |
| YDL020C                                          | RPN4          | YDL013W                 | SLX5          |

| Predictions at threshold level 0.75 continued... |               |                         |               |
|--------------------------------------------------|---------------|-------------------------|---------------|
| Gene1 of predicted pair                          |               | Gene2 of predicted pair |               |
| Systematic Name                                  | Standard Name | Systematic Name         | Standard Name |
| YOR106W                                          | VAM3          | YNL199C                 | GCR2          |
| YML058W                                          | SML1          | YLR032W                 | RAD5          |
| YGL212W                                          | VAM7          | YOR043W                 | WHI2          |
| YEL027W                                          | CUP5          | YMR054W                 | STV1          |
| YKR099W                                          | BAS1          | YGL025C                 | PGD1          |
| YNL087W                                          | TCB2          | YHR039C-A               | VMA10         |
| YFR030W                                          | MET10         | YDR318W                 | MCM21         |
| YER143W                                          | DDI1          | YMR276W                 | DSK2          |
| YDR439W                                          | LRS4          | YHR111W                 | UBA4          |
| YHR060W                                          | VMA22         | YDL192W                 | ARF1          |
| YJL124C                                          | LSM1          | YLR410W                 | VIP1          |
| YKR035W-A                                        | DID2          | YER162C                 | RAD4          |
| YEL009C                                          | GCN4          | YBR009C                 | HHF1          |
| YDR137W                                          | RGP1          | YOR066W                 | MSA1          |
| YOL051W                                          | GAL11         | YBR089C-A               | NHP6B         |
| YJR040W                                          | GEF1          | YDR310C                 | SUM1          |
| YMR198W                                          | CIK1          | YJL058C                 | BIT61         |
| YKL139W                                          | CTK1          | YJR060W                 | CBF1          |
| YCR034W                                          | FEN1          | YCR031C                 | RPS14A        |
| YGR072W                                          | UPF3          | YOR243C                 | PUS7          |
| YLR417W                                          | VPS36         | YNL243W                 | SLA2          |
| YPR052C                                          | NHP6A         | YPL129W                 | TAF14         |
| YFL023W                                          | BUD27         | YDL192W                 | ARF1          |
| YDR174W                                          | HMO1          | YLR315W                 | NKP2          |
| YFR031C-A                                        | RPL2A         | YFR036W                 | CDC26         |
| YDL006W                                          | PTC1          | YJL004C                 | SYS1          |
| YNL069C                                          | RPL16B        | YOR112W                 | CEX1          |
| YFR031C-A                                        | RPL2A         | YKR099W                 | BAS1          |
| YOR327C                                          | SNC2          | YEL036C                 | ANP1          |



| Predictions at threshold level 0.75 continued... |               |                         |               |
|--------------------------------------------------|---------------|-------------------------|---------------|
| Gene1 of predicted pair                          |               | Gene2 of predicted pair |               |
| Systematic Name                                  | Standard Name | Systematic Name         | Standard Name |
| YGL100W                                          | SEH1          | YCL061C                 | MRC1          |
| YHR156C                                          | LIN1          | YOR290C                 | SNF2          |
| YDL116W                                          | NUP84         | YGL115W                 | SNF4          |
| YIL034C                                          | CAP2          | YBL103C                 | RTG3          |
| YLR095C                                          | IOC2          | YBR200W                 | BEM1          |
| YHR134W                                          | WSS1          | YJL095W                 | BCK1          |
| YKR072C                                          | SIS2          | YGL151W                 | NUT1          |
| YOR023C                                          | AHC1          | YDR289C                 | RTT103        |
| YML062C                                          | MFT1          | YPR046W                 | MCM16         |
| YHR178W                                          | STB5          | YBR107C                 | IML3          |
| YBR200W                                          | BEM1          | YLR254C                 | NDL1          |
| YOR033C                                          | EXO1          | YPL024W                 | RMI1          |
| YBL058W                                          | SHP1          | YER116C                 | SLX8          |
| YNL291C                                          | MID1          | YDR260C                 | SWM1          |
| YGL115W                                          | SNF4          | YER139C                 | YER139C       |
| YLR288C                                          | MEC3          | YPL001W                 | HAT1          |
| YOR270C                                          | VPH1          | YKL048C                 | ELM1          |
| YGL043W                                          | DST1          | YBR089C-A               | NHP6B         |
| YPR036W                                          | VMA13         | YMR311C                 | GLC8          |
| YAL010C                                          | MDM10         | YDR183W                 | PLP1          |
| YCR020C-A                                        | MAK31         | YGL212W                 | VAM7          |
| YLR248W                                          | RCK2          | YDL047W                 | SIT4          |
| YDR443C                                          | SSN2          | YDL192W                 | ARF1          |
| YML115C                                          | VAN1          | YBR131W                 | CCZ1          |
| YKL092C                                          | BUD2          | YPR119W                 | CLB2          |
| YFR010W                                          | UBP6          | YPL161C                 | BEM4          |
| YHR134W                                          | WSS1          | YBR228W                 | SLX1          |
| YER180C-A                                        | SLO1          | YPL051W                 | ARL3          |
| YKL126W                                          | YPK1          | YNR072W                 | HXT17         |

| Predictions at threshold level 0.75 continued... |               |                         |               |
|--------------------------------------------------|---------------|-------------------------|---------------|
| Gene1 of predicted pair                          |               | Gene2 of predicted pair |               |
| Systematic Name                                  | Standard Name | Systematic Name         | Standard Name |
| YDL155W                                          | CLB3          | YLR233C                 | EST1          |
| YGR270W                                          | YTA7          | YCR086W                 | CSM1          |
| YHR156C                                          | LIN1          | YNL087W                 | TCB2          |
| YHR060W                                          | VMA22         | YHR200W                 | RPN10         |
| YNL238W                                          | KEX2          | YJL095W                 | BCK1          |
| YFR036W                                          | CDC26         | YJL095W                 | BCK1          |
| YBR231C                                          | SWC5          | YBR089C-A               | NHP6B         |
| YJR060W                                          | CBF1          | YDL047W                 | SIT4          |
| YDR363W-A                                        | SEM1          | YER143W                 | DDI1          |
| YJL006C                                          | CTK2          | YBL072C                 | RPS8A         |
| YHL031C                                          | GOS1          | YKL160W                 | ELF1          |
| YNL206C                                          | RTT106        | YDR254W                 | CHL4          |
| YJL058C                                          | BIT61         | YNL107W                 | YAF9          |
| YDL116W                                          | NUP84         | YDL020C                 | RPN4          |
| YCR077C                                          | PAT1          | YOR124C                 | UBP2          |
| YLR119W                                          | SRN2          | YML115C                 | VAN1          |
| YPL234C                                          | TFP3          | YKL080W                 | VMA5          |
| YDL077C                                          | VAM6          | YMR230W                 | RPS10B        |
| YMR039C                                          | SUB1          | YBR036C                 | CSG2          |
| YDL002C                                          | NHP10         | YBR215W                 | HPC2          |
| YLR234W                                          | TOP3          | YDR207C                 | UME6          |
| YMR068W                                          | AVO2          | YNL047C                 | SLM2          |
| YLR309C                                          | IMH1          | YDR310C                 | SUM1          |
| YOR069W                                          | VPS5          | YML038C                 | YMD8          |
| YOR035C                                          | SHE4          | YBR019C                 | GAL10         |
| YHR178W                                          | STB5          | YCR086W                 | CSM1          |
| YLL039C                                          | UBI4          | YML115C                 | VAN1          |
| YOR127W                                          | RGA1          | YDR207C                 | UME6          |
| YGL087C                                          | MMS2          | YKL048C                 | ELM1          |

| Predictions at threshold level 0.75 continued... |               |                         |               |
|--------------------------------------------------|---------------|-------------------------|---------------|
| Gene1 of predicted pair                          |               | Gene2 of predicted pair |               |
| Systematic Name                                  | Standard Name | Systematic Name         | Standard Name |
| YDR443C                                          | SSN2          | YNL199C                 | GCR2          |
| YPR018W                                          | RLF2          | YLR399C                 | BDF1          |
| YLR018C                                          | POM34         | YOR080W                 | DIA2          |
| YHR134W                                          | WSS1          | YML016C                 | PPZ1          |
| YOR109W                                          | INP53         | YPR173C                 | VPS4          |
| YDR484W                                          | VPS52         | YGL115W                 | SNF4          |
| YMR142C                                          | RPL13B        | YLR094C                 | GIS3          |
| YDL099W                                          | BUG1          | YKL050C                 | YKL050C       |
| YBL103C                                          | RTG3          | YBR280C                 | SAF1          |
| YGL178W                                          | MPT5          | YDL074C                 | BRE1          |
| YDL184C                                          | RPL41A        | YNL076W                 | MKS1          |
| YJL164C                                          | TPK1          | YNR049C                 | MSO1          |
| YLL007C                                          | YLL007C       | YDR155C                 | CPR1          |
| YMR055C                                          | BUB2          | YLR254C                 | NDL1          |
| YBR126C                                          | TPS1          | YBR036C                 | CSG2          |
| YBL058W                                          | SHP1          | YOR066W                 | MSA1          |
| YOR127W                                          | RGA1          | YNL041C                 | COG6          |
| YMR004W                                          | MVP1          | YGL223C                 | COG1          |
| YPL024W                                          | RMI1          | YNL238W                 | KEX2          |
| YPL253C                                          | VIK1          | YOR368W                 | RAD17         |
| YJL190C                                          | RPS22A        | YOL067C                 | RTG1          |
| YPR036W                                          | VMA13         | YLR447C                 | VMA6          |
| YEL013W                                          | VAC8          | YLR350W                 | ORM2          |
| YBL058W                                          | SHP1          | YHR039C-A               | VMA10         |
| YLR386W                                          | VAC14         | YER139C                 | YER139C       |
| YLR234W                                          | TOP3          | YLR370C                 | ARC18         |
| YDR004W                                          | RAD57         | YDR335W                 | MSN5          |
| YKL010C                                          | UFD4          | YCR077C                 | PAT1          |
| YIL053W                                          | RHR2          | YMR214W                 | SCJ1          |

| Predictions at threshold level 0.75 continued... |               |                         |               |
|--------------------------------------------------|---------------|-------------------------|---------------|
| Gene1 of predicted pair                          |               | Gene2 of predicted pair |               |
| Systematic Name                                  | Standard Name | Systematic Name         | Standard Name |
| YDR383C                                          | NKP1          | YPL018W                 | CTF19         |
| YDR254W                                          | CHL4          | YBR114W                 | RAD16         |
| YCL037C                                          | SRO9          | YPL105C                 | YPL105C       |
| YDR225W                                          | HTA1          | YDR216W                 | ADR1          |
| YLR079W                                          | SIC1          | YGL016W                 | KAP122        |
| YKL048C                                          | ELM1          | YLR452C                 | SST2          |
| YIL162W                                          | SUC2          | YML019W                 | OST6          |
| YGL033W                                          | HOP2          | YER116C                 | SLX8          |
| YMR095C                                          | SNO1          | YJL183W                 | MNN11         |
| YBR215W                                          | HPC2          | YMR231W                 | PEP5          |
| YMR224C                                          | MRE11         | YBL079W                 | NUP170        |
| YGL025C                                          | PGD1          | YGL124C                 | MON1          |
| YNL032W                                          | SIW14         | YJR032W                 | CPR7          |
| YER110C                                          | KAP123        | YGR188C                 | BUB1          |
| YBR217W                                          | ATG12         | YER144C                 | UBP5          |
| YDR385W                                          | EFT2          | YDR358W                 | GGA1          |
| YGL033W                                          | HOP2          | YOR043W                 | WHI2          |
| YBL008W                                          | HIR1          | YFR036W                 | CDC26         |
| YBR057C                                          | MUM2          | YOR014W                 | RTS1          |
| YKR072C                                          | SIS2          | YHR039C-A               | VMA10         |
| YJL058C                                          | BIT61         | YNL236W                 | SIN4          |
| YNL291C                                          | MID1          | YGR184C                 | UBR1          |
| YBR200W                                          | BEM1          | YDL159W                 | STE7          |
| YOR312C                                          | RPL20B        | YBL072C                 | RPS8A         |
| YBR107C                                          | IML3          | YPL106C                 | SSE1          |
| YDR146C                                          | SWI5          | YHR152W                 | SPO12         |
| YJL154C                                          | VPS35         | YDR484W                 | VPS52         |
| YMR016C                                          | SOK2          | YPL057C                 | SUR1          |
| YOR275C                                          | RIM20         | YMR038C                 | CCS1          |

| Predictions at threshold level 0.75 continued... |               |                         |               |
|--------------------------------------------------|---------------|-------------------------|---------------|
| Gene1 of predicted pair                          |               | Gene2 of predicted pair |               |
| Systematic Name                                  | Standard Name | Systematic Name         | Standard Name |
| YDR363W-A                                        | SEM1          | YLR350W                 | ORM2          |
| YHR098C                                          | SFB3          | YDR334W                 | SWR1          |
| YDR443C                                          | SSN2          | YOL081W                 | IRA2          |
| YLR292C                                          | SEC72         | YDR310C                 | SUM1          |
| YGR072W                                          | UPF3          | YGR020C                 | VMA7          |
| YGR020C                                          | VMA7          | YNL051W                 | COG5          |
| YDR456W                                          | NHX1          | YEL036C                 | ANP1          |
| YGL033W                                          | HOP2          | YBR030W                 | YBR030W       |
| YJL060W                                          | BNA3          | YBR200W                 | BEM1          |
| YBR036C                                          | CSG2          | YBR280C                 | SAF1          |
| YLR441C                                          | RPS1A         | YEL053C                 | MAK10         |
| YLR360W                                          | VPS38         | YER096W                 | SHC1          |
| YCR002C                                          | CDC10         | YNL166C                 | BNI5          |
| YJR040W                                          | GEF1          | YDR153C                 | ENT5          |
| YBL103C                                          | RTG3          | YLR370C                 | ARC18         |
| YDL223C                                          | HBT1          | YLR452C                 | SST2          |
| YGR105W                                          | VMA21         | YPL195W                 | APL5          |
| YMR205C                                          | PFK2          | YOR275C                 | RIM20         |
| YDR443C                                          | SSN2          | YJR056C                 | YJR056C       |
| YJL004C                                          | SYS1          | YOR284W                 | HUA2          |
| YPL240C                                          | HSP82         | YGL094C                 | PAN2          |
| YPR030W                                          | CSR2          | YOR327C                 | SNC2          |
| YML103C                                          | NUP188        | YHR013C                 | ARD1          |
| YBR107C                                          | IML3          | YNL107W                 | YAF9          |
| YJL036W                                          | SNX4          | YEL043W                 | YEL043W       |
| YGL250W                                          | RMR1          | YMR167W                 | MLH1          |
| YLR083C                                          | EMP70         | YDR320C                 | SWA2          |
| YLR093C                                          | NYV1          | YDL192W                 | ARF1          |
| YOR112W                                          | CEX1          | YFL033C                 | RIM15         |

| Predictions at threshold level 0.75 continued... |               |                         |               |
|--------------------------------------------------|---------------|-------------------------|---------------|
| Gene1 of predicted pair                          |               | Gene2 of predicted pair |               |
| Systematic Name                                  | Standard Name | Systematic Name         | Standard Name |
| YAL024C                                          | LTE1          | YNL087W                 | TCB2          |
| YOR195W                                          | SLK19         | YIR005W                 | IST3          |
| YOR043W                                          | WHI2          | YNL238W                 | KEX2          |
| YBR258C                                          | SHG1          | YNL107W                 | YAF9          |
| YLR192C                                          | HCR1          | YPL137C                 | GIP3          |
| YGL163C                                          | RAD54         | YKR048C                 | NAP1          |
| YKL129C                                          | MYO3          | YMR032W                 | HOF1          |
| YOR001W                                          | RRP6          | YLR381W                 | CTF3          |
| YER144C                                          | UBP5          | YLR180W                 | SAM1          |
| YGR020C                                          | VMA7          | YDR137W                 | RGP1          |
| YLR090W                                          | XDJ1          | YPL161C                 | BEM4          |
| YLR240W                                          | VPS34         | YKR001C                 | VPS1          |
| YNL087W                                          | TCB2          | YLR180W                 | SAM1          |
| YGL133W                                          | ITC1          | YJL065C                 | DLS1          |
| YPL129W                                          | TAF14         | YDR216W                 | ADR1          |
| YCR086W                                          | CSM1          | YLR182W                 | SWI6          |
| YGL060W                                          | YBP2          | YLR370C                 | ARC18         |
| YLR191W                                          | PEX13         | YGL153W                 | PEX14         |
| YNL058C                                          | YNL058C       | YBR036C                 | CSG2          |
| YLR083C                                          | EMP70         | YJL004C                 | SYS1          |
| YPL037C                                          | EGD1          | YDL192W                 | ARF1          |
| YOR270C                                          | VPH1          | YGL003C                 | CDH1          |
| YNL069C                                          | RPL16B        | YEL051W                 | VMA8          |
| YGR261C                                          | APL6          | YPL259C                 | APM1          |
| YOR195W                                          | SLK19         | YMR199W                 | CLN1          |
| YBR009C                                          | HHF1          | YNL107W                 | YAF9          |
| YNL243W                                          | SLA2          | YER122C                 | GLO3          |
| YGR072W                                          | UPF3          | YNL069C                 | RPL16B        |
| YGL066W                                          | SGF73         | YPR119W                 | CLB2          |

| Predictions at threshold level 0.75 continued... |               |                         |               |
|--------------------------------------------------|---------------|-------------------------|---------------|
| Gene1 of predicted pair                          |               | Gene2 of predicted pair |               |
| Systematic Name                                  | Standard Name | Systematic Name         | Standard Name |
| YIL053W                                          | RHR2          | YER044C                 | ERG28         |
| YOR033C                                          | EXO1          | YML095C                 | RAD10         |
| YIL159W                                          | BNR1          | YCR053W                 | THR4          |
| YNL025C                                          | SSN8          | YOR140W                 | SFL1          |
| YLR234W                                          | TOP3          | YGL253W                 | HXK2          |
| YPR046W                                          | MCM16         | YOR327C                 | SNC2          |
| YGL078C                                          | DBP3          | YJL183W                 | MNN11         |
| YLR386W                                          | VAC14         | YBL021C                 | HAP3          |
| YFR034C                                          | PHO4          | YHR200W                 | RPN10         |
| YDL020C                                          | RPN4          | YLR032W                 | RAD5          |
| YPL240C                                          | HSP82         | YGL192W                 | IME4          |
| YIL005W                                          | EPS1          | YKL117W                 | SBA1          |
| YFL023W                                          | BUD27         | YLR371W                 | ROM2          |
| YKR061W                                          | KTR2          | YCR086W                 | CSM1          |
| YNL166C                                          | BNI5          | YMR109W                 | MYO5          |
| YER001W                                          | MNN1          | YNL041C                 | COG6          |
| YPL256C                                          | CLN2          | YGL016W                 | KAP122        |
| YDR142C                                          | PEX7          | YGR077C                 | PEX8          |
| YOR066W                                          | MSA1          | YOL081W                 | IRA2          |
| YNL291C                                          | MID1          | YOL090W                 | MSH2          |
| YJL053W                                          | PEP8          | YJL004C                 | SYS1          |
| YNL297C                                          | MON2          | YOL018C                 | TLG2          |
| YDL116W                                          | NUP84         | YGL016W                 | KAP122        |
| YAL016W                                          | TPD3          | YPL152W                 | RRD2          |
| YFR036W                                          | CDC26         | YDR289C                 | RTT103        |
| YKL126W                                          | YPK1          | YKL048C                 | ELM1          |
| YOR290C                                          | SNF2          | YER040W                 | GLN3          |
| YBR200W                                          | BEM1          | YDL083C                 | RPS16B        |
| YOR069W                                          | VPS5          | YPR051W                 | MAK3          |

| Predictions at threshold level 0.75 continued... |               |                         |               |
|--------------------------------------------------|---------------|-------------------------|---------------|
| Gene1 of predicted pair                          |               | Gene2 of predicted pair |               |
| Systematic Name                                  | Standard Name | Systematic Name         | Standard Name |
| YDR293C                                          | SSD1          | YDR108W                 | GSG1          |
| YMR224C                                          | MRE11         | YPL137C                 | GIP3          |
| YJR056C                                          | YJR056C       | YER162C                 | RAD4          |
| YGR270W                                          | YTA7          | YFR030W                 | MET10         |
| YAR014C                                          | BUD14         | YDR310C                 | SUM1          |
| YDL020C                                          | RPN4          | YHR077C                 | NMD2          |
| YJL137C                                          | GLG2          | YLR258W                 | GSY2          |
| YPR051W                                          | MAK3          | YDR310C                 | SUM1          |
| YOL121C                                          | RPS19A        | YBR019C                 | GAL10         |
| YJR135C                                          | MCM22         | YPL018W                 | CTF19         |
| YGL212W                                          | VAM7          | YGR135W                 | PRE9          |
| YOR275C                                          | RIM20         | YKR035W-A               | DID2          |
| YCL063W                                          | VAC17         | YPR119W                 | CLB2          |
| YHR205W                                          | SCH9          | YOR106W                 | VAM3          |
| YJR140C                                          | HIR3          | YHR167W                 | THP2          |
| YOR185C                                          | GSP2          | YLR131C                 | ACE2          |
| YNL199C                                          | GCR2          | YKR024C                 | DBP7          |
| YGR261C                                          | APL6          | YKR001C                 | VPS1          |
| YHR205W                                          | SCH9          | YDR264C                 | AKR1          |
| YPL024W                                          | RMI1          | YDR310C                 | SUM1          |
| YLL039C                                          | UBI4          | YBR057C                 | MUM2          |
| YAL014C                                          | SYN8          | YGL095C                 | VPS45         |
| YKR001C                                          | VPS1          | YGL095C                 | VPS45         |
| YBR126C                                          | TPS1          | YEL053C                 | MAK10         |
| YDR383C                                          | NKP1          | YDR254W                 | CHL4          |
| YLR090W                                          | XDJ1          | YBR280C                 | SAF1          |
| YLR240W                                          | VPS34         | YGR241C                 | YAP1802       |
| YDR477W                                          | SNF1          | YOR014W                 | RTS1          |
| YJL053W                                          | PEP8          | YJL029C                 | VPS53         |



| Predictions at threshold level 0.75 continued... |               |                         |               |
|--------------------------------------------------|---------------|-------------------------|---------------|
| Gene1 of predicted pair                          |               | Gene2 of predicted pair |               |
| Systematic Name                                  | Standard Name | Systematic Name         | Standard Name |
| YIL076W                                          | SEC28         | YNL297C                 | MON2          |
| YDR289C                                          | RTT103        | YJL095W                 | BCK1          |
| YJR032W                                          | CPR7          | YDR155C                 | CPR1          |
| YOR337W                                          | TEA1          | YBR217W                 | ATG12         |
| YER044C                                          | ERG28         | YLR320W                 | MMS22         |
| YCL067C                                          | HMLALPHA2     | YLR176C                 | RFX1          |
| YPL129W                                          | TAF14         | YOR290C                 | SNF2          |
| YDL042C                                          | SIR2          | YNL030W                 | HHF2          |
| YLR288C                                          | MEC3          | YLR234W                 | TOP3          |
| YBR108W                                          | YBR108W       | YDL155W                 | CLB3          |
| YDR378C                                          | LSM6          | YBL072C                 | RPS8A         |
| YAL056W                                          | GPB2          | YGL121C                 | GPG1          |
| YPL105C                                          | YPL105C       | YNL107W                 | YAF9          |
| YGL078C                                          | DBP3          | YGL212W                 | VAM7          |
| YJL187C                                          | SWE1          | YER027C                 | GAL83         |
| YDL232W                                          | OST4          | YML019W                 | OST6          |
| YDR469W                                          | SDC1          | YGR135W                 | PRE9          |
| YHR060W                                          | VMA22         | YEL060C                 | PRB1          |
| YLR079W                                          | SIC1          | YML115C                 | VAN1          |
| YGL071W                                          | AFT1          | YBR112C                 | CYC8          |
| YHR156C                                          | LIN1          | YIL076W                 | SEC28         |
| YLR337C                                          | VRP1          | YMR172W                 | HOT1          |
| YGL066W                                          | SGF73         | YDR076W                 | RAD55         |
| YDR335W                                          | MSN5          | YAR014C                 | BUD14         |
| YDR144C                                          | MKC7          | YHL002W                 | HSE1          |
| YMR095C                                          | SNO1          | YDR137W                 | RGP1          |
| YOR106W                                          | VAM3          | YPL045W                 | VPS16         |
| YFR031C-A                                        | RPL2A         | YOR127W                 | RGA1          |
| YPR036W                                          | VMA13         | YNL058C                 | YNL058C       |

| Predictions at threshold level 0.75 continued... |               |                         |               |
|--------------------------------------------------|---------------|-------------------------|---------------|
| Gene1 of predicted pair                          |               | Gene2 of predicted pair |               |
| Systematic Name                                  | Standard Name | Systematic Name         | Standard Name |
| YPR036W                                          | VMA13         | YBR127C                 | VMA2          |
| YKL139W                                          | CTK1          | YPL161C                 | BEM4          |
| YMR198W                                          | CIK1          | YMR179W                 | SPT21         |
| YDR477W                                          | SNF1          | YKL048C                 | ELM1          |
| YLR381W                                          | CTF3          | YJL095W                 | BCK1          |
| YJL127C                                          | SPT10         | YOR141C                 | ARP8          |
| YHR134W                                          | WSS1          | YPL079W                 | RPL21B        |
| YHR156C                                          | LIN1          | YBR030W                 | YBR030W       |
| YER161C                                          | SPT2          | YGL163C                 | RAD54         |
| YOR043W                                          | WHI2          | YLR093C                 | NYV1          |
| YHR052W                                          | CIC1          | YJL190C                 | RPS22A        |
| YNR052C                                          | POP2          | YJR063W                 | RPA12         |
| YGL147C                                          | RPL9A         | YLR093C                 | NYV1          |
| YDL223C                                          | HBT1          | YPR030W                 | CSR2          |
| YMR080C                                          | NAM7          | YKL068W                 | NUP100        |
| YOR080W                                          | DIA2          | YLR429W                 | CRN1          |
| YNL236W                                          | SIN4          | YDL155W                 | CLB3          |
| YMR224C                                          | MRE11         | YDR129C                 | SAC6          |
| YGL212W                                          | VAM7          | YKR030W                 | GMH1          |
| YKL025C                                          | PAN3          | YGL124C                 | MON1          |
| YGR261C                                          | APL6          | YOL108C                 | INO4          |
| YOR375C                                          | GDH1          | YMR089C                 | YTA12         |
| YNL238W                                          | KEX2          | YPL120W                 | VPS30         |
| YPL161C                                          | BEM4          | YGL115W                 | SNF4          |
| YGL087C                                          | MMS2          | YML028W                 | TSA1          |
| YMR109W                                          | MYO5          | YEL053C                 | MAK10         |
| YPL256C                                          | CLN2          | YMR311C                 | GLC8          |
| YNL238W                                          | KEX2          | YNL107W                 | YAF9          |
| YDR174W                                          | HMO1          | YPR046W                 | MCM16         |

| Predictions at threshold level 0.75 continued... |               |                         |               |
|--------------------------------------------------|---------------|-------------------------|---------------|
| Gene1 of predicted pair                          |               | Gene2 of predicted pair |               |
| Systematic Name                                  | Standard Name | Systematic Name         | Standard Name |
| YHR052W                                          | CIC1          | YJL124C                 | LSM1          |
| YOR038C                                          | HIR2          | YKL109W                 | HAP4          |
| YLR292C                                          | SEC72         | YNL107W                 | YAF9          |
| YPL161C                                          | BEM4          | YDL006W                 | PTC1          |
| YOR195W                                          | SLK19         | YDR363W-A               | SEM1          |
| YGR104C                                          | SRB5          | YFL013C                 | IES1          |
| YKL213C                                          | DOA1          | YLR315W                 | NKP2          |
| YGL223C                                          | COG1          | YER162C                 | RAD4          |
| YPL105C                                          | YPL105C       | YMR054W                 | STV1          |
| YPL178W                                          | CBC2          | YNL199C                 | GCR2          |
| YFR036W                                          | CDC26         | YAR014C                 | BUD14         |
| YLR192C                                          | HCR1          | YOR327C                 | SNC2          |
| YPL042C                                          | SSN3          | YBR010W                 | HHT1          |
| YDL006W                                          | PTC1          | YJR033C                 | RAV1          |
| YOR080W                                          | DIA2          | YDL155W                 | CLB3          |
| YKL126W                                          | YPK1          | YHR039C-A               | VMA10         |
| YDL232W                                          | OST4          | YGL226C-A               | OST5          |
| YNL243W                                          | SLA2          | YPL161C                 | BEM4          |
| YGR020C                                          | VMA7          | YGL115W                 | SNF4          |
| YIL053W                                          | RHR2          | YMR016C                 | SOK2          |
| YOR191W                                          | RIS1          | YHR134W                 | WSS1          |
| YFR010W                                          | UBP6          | YGR188C                 | BUB1          |
| YDR293C                                          | SSD1          | YNL051W                 | COG5          |
| YLR337C                                          | VRP1          | YML016C                 | PPZ1          |
| YDR439W                                          | LRS4          | YML016C                 | PPZ1          |
| YBR131W                                          | CCZ1          | YGL124C                 | MON1          |
| YNL201C                                          | PSY2          | YPL018W                 | CTF19         |
| YHL031C                                          | GOS1          | YGL200C                 | EMP24         |
| YDL184C                                          | RPL41A        | YDL223C                 | HBT1          |

| Predictions at threshold level 0.75 continued... |               |                         |               |
|--------------------------------------------------|---------------|-------------------------|---------------|
| Gene1 of predicted pair                          |               | Gene2 of predicted pair |               |
| Systematic Name                                  | Standard Name | Systematic Name         | Standard Name |
| YGL003C                                          | CDH1          | YDL192W                 | ARF1          |
| YLR182W                                          | SWI6          | YKR030W                 | GMH1          |
| YEL053C                                          | MAK10         | YOR327C                 | SNC2          |
| YBR020W                                          | GAL1          | YNL107W                 | YAF9          |
| YLR079W                                          | SIC1          | YKL110C                 | KTI12         |
| YPR018W                                          | RLF2          | YNL107W                 | YAF9          |
| YOR270C                                          | VPH1          | YOR043W                 | WHI2          |
| YML115C                                          | VAN1          | YCR077C                 | PAT1          |
| YGL223C                                          | COG1          | YJR033C                 | RAV1          |
| YGL158W                                          | RCK1          | YNL065W                 | AQR1          |
| YJL030W                                          | MAD2          | YHR205W                 | SCH9          |
| YBR171W                                          | SEC66         | YDR144C                 | MKC7          |
| YKL139W                                          | CTK1          | YLR094C                 | GIS3          |
| YDR156W                                          | RPA14         | YDR318W                 | MCM21         |
| YMR116C                                          | ASC1          | YDR378C                 | LSM6          |
| YLR386W                                          | VAC14         | YDR144C                 | MKC7          |
| YLR018C                                          | POM34         | YCR024C-A               | PMP1          |
| YMR016C                                          | SOK2          | YOR270C                 | VPH1          |
| YOR127W                                          | RGA1          | YJR032W                 | CPR7          |
| YPL115C                                          | BEM3          | YJL095W                 | BCK1          |
| YMR026C                                          | PEX12         | YER116C                 | SLX8          |
| YER129W                                          | SAK1          | YJR090C                 | GRR1          |
| YIL034C                                          | CAP2          | YML095C                 | RAD10         |
| YLR192C                                          | HCR1          | YOR270C                 | VPH1          |
| YOR008C                                          | SLG1          | YLR371W                 | ROM2          |
| YKL025C                                          | PAN3          | YIL008W                 | URM1          |
| YML117W                                          | NAB6          | YML115C                 | VAN1          |
| YNL041C                                          | COG6          | YBR019C                 | GAL10         |
| YOL145C                                          | CTR9          | YOL051W                 | GAL11         |

| Predictions at threshold level 0.75 continued... |               |                         |               |
|--------------------------------------------------|---------------|-------------------------|---------------|
| Gene1 of predicted pair                          |               | Gene2 of predicted pair |               |
| Systematic Name                                  | Standard Name | Systematic Name         | Standard Name |
| YLR079W                                          | SIC1          | YML016C                 | PPZ1          |
| YNL069C                                          | RPL16B        | YEL043W                 | YEL043W       |
| YGL147C                                          | RPL9A         | YDR137W                 | RGP1          |
| YLR095C                                          | IOC2          | YBL058W                 | SHP1          |
| YDR318W                                          | MCM21         | YHR114W                 | BZZ1          |
| YIL034C                                          | CAP2          | YEL056W                 | HAT2          |
| YGL212W                                          | VAM7          | YDR137W                 | RGP1          |
| YHR160C                                          | PEX18         | YDR244W                 | PEX5          |
| YOL018C                                          | TLG2          | YJR033C                 | RAV1          |
| YGR019W                                          | UGA1          | YDR318W                 | MCM21         |
| YNL106C                                          | INP52         | YNL248C                 | RPA49         |
| YML103C                                          | NUP188        | YER116C                 | SLX8          |
| YNL068C                                          | FKH2          | YGR135W                 | PRE9          |
| YNL289W                                          | PCL1          | YDR309C                 | GIC2          |
| YPL115C                                          | BEM3          | YEL053C                 | MAK10         |
| YGR249W                                          | MGA1          | YMR311C                 | GLC8          |
| YOR038C                                          | HIR2          | YER122C                 | GLO3          |
| YMR199W                                          | CLN1          | YIL008W                 | URM1          |
| YLR234W                                          | TOP3          | YML102W                 | CAC2          |
| YDR137W                                          | RGP1          | YLR447C                 | VMA6          |
| YOR080W                                          | DIA2          | YLR131C                 | ACE2          |
| YHL020C                                          | OPI1          | YLR309C                 | IMH1          |
| YDL116W                                          | NUP84         | YOR368W                 | RAD17         |
| YML095C                                          | RAD10         | YJL058C                 | BIT61         |
| YPL024W                                          | RMI1          | YLR441C                 | RPS1A         |
| YAL024C                                          | LTE1          | YOR270C                 | VPH1          |
| YIL036W                                          | CST6          | YJR063W                 | RPA12         |
| YPL112C                                          | PEX25         | YMR204C                 | INP1          |
| YDR261C                                          | EXG2          | YJL095W                 | BCK1          |

| Predictions at threshold level 0.75 continued... |               |                         |               |
|--------------------------------------------------|---------------|-------------------------|---------------|
| Gene1 of predicted pair                          |               | Gene2 of predicted pair |               |
| Systematic Name                                  | Standard Name | Systematic Name         | Standard Name |
| YLR018C                                          | POM34         | YJR024C                 | MDE1          |
| YBR010W                                          | HHT1          | YPL248C                 | GAL4          |
| YDL020C                                          | RPN4          | YMR038C                 | CCS1          |
| YBR260C                                          | RGD1          | YMR032W                 | HOF1          |
| YNL325C                                          | FIG4          | YJL095W                 | BCK1          |
| YEL060C                                          | PRB1          | YDR207C                 | UME6          |
| YDL160C                                          | DHH1          | YPR119W                 | CLB2          |
| YEL015W                                          | EDC3          | YER124C                 | DSE1          |
| YMR032W                                          | HOF1          | YHR114W                 | BZZ1          |
| YFR036W                                          | CDC26         | YGL252C                 | RTG2          |
| YLR234W                                          | TOP3          | YGL175C                 | SAE2          |
| YOR080W                                          | DIA2          | YML028W                 | TSA1          |
| YNL079C                                          | TPM1          | YLR425W                 | TUS1          |
| YPR036W                                          | VMA13         | YDL077C                 | VAM6          |
| YHR161C                                          | YAP1801       | YNR006W                 | VPS27         |
| YDR293C                                          | SSD1          | YJR033C                 | RAV1          |
| YDR146C                                          | SWI5          | YBR195C                 | MSI1          |
| YEL027W                                          | CUP5          | YKL080W                 | VMA5          |
| YBR107C                                          | IML3          | YML112W                 | CTK3          |
| YGR275W                                          | RTT102        | YNL041C                 | COG6          |
| YLR371W                                          | ROM2          | YGL003C                 | CDH1          |
| YLR006C                                          | SSK1          | YDR309C                 | GIC2          |
| YGL060W                                          | YBP2          | YOR195W                 | SLK19         |
| YDL155W                                          | CLB3          | YJL190C                 | RPS22A        |
| YBR108W                                          | YBR108W       | YGL151W                 | NUT1          |
| YHR178W                                          | STB5          | YHR012W                 | VPS29         |
| YKR020W                                          | VPS51         | YPL234C                 | TFP3          |
| YJR084W                                          | CSN12         | YER122C                 | GLO3          |
| YDR245W                                          | MNN10         | YJL095W                 | BCK1          |

| Predictions at threshold level 0.75 continued... |               |                         |               |
|--------------------------------------------------|---------------|-------------------------|---------------|
| Gene1 of predicted pair                          |               | Gene2 of predicted pair |               |
| Systematic Name                                  | Standard Name | Systematic Name         | Standard Name |
| YPL042C                                          | SSN3          | YDL155W                 | CLB3          |
| YBR195C                                          | MSI1          | YJR035W                 | RAD26         |
| YLR083C                                          | EMP70         | YPL105C                 | YPL105C       |
| YPL042C                                          | SSN3          | YBR200W                 | BEM1          |
| YIL002C                                          | INP51         | YKR020W                 | VPS51         |
| YKR061W                                          | KTR2          | YOL054W                 | PSH1          |
| YHR013C                                          | ARD1          | YBL101C                 | ECM21         |
| YLR234W                                          | TOP3          | YOL030W                 | GAS5          |
| YBR131W                                          | CCZ1          | YJR032W                 | CPR7          |
| YDR358W                                          | GGA1          | YJR084W                 | CSN12         |
| YAL024C                                          | LTE1          | YOR038C                 | HIR2          |
| YNL206C                                          | RTT106        | YDR318W                 | MCM21         |
| YKR020W                                          | VPS51         | YDR440W                 | DOT1          |
| YNL041C                                          | COG6          | YDL192W                 | ARF1          |
| YJR140C                                          | HIR3          | YGL163C                 | RAD54         |
| YLR094C                                          | GIS3          | YML071C                 | COG8          |
| YLR315W                                          | NKP2          | YNL225C                 | CNM67         |
| YLR095C                                          | IOC2          | YBR280C                 | SAF1          |
| YHL031C                                          | GOS1          | YGL115W                 | SNF4          |
| YOR344C                                          | TYE7          | YOL108C                 | INO4          |
| YLR386W                                          | VAC14         | YDR363W-A               | SEM1          |
| YOR080W                                          | DIA2          | YIR005W                 | IST3          |
| YDR261C                                          | EXG2          | YLR180W                 | SAM1          |
| YER116C                                          | SLX8          | YMR214W                 | SCJ1          |
| YBR131W                                          | CCZ1          | YLR396C                 | VPS33         |
| YKR035W-A                                        | DID2          | YOL081W                 | IRA2          |
| YDR448W                                          | ADA2          | YLR176C                 | RFX1          |
| YDR097C                                          | MSH6          | YNL082W                 | PMS1          |
| YBL047C                                          | EDE1          | YFR036W                 | CDC26         |

| Predictions at threshold level 0.75 continued... |               |                         |               |
|--------------------------------------------------|---------------|-------------------------|---------------|
| Gene1 of predicted pair                          |               | Gene2 of predicted pair |               |
| Systematic Name                                  | Standard Name | Systematic Name         | Standard Name |
| YOR308C                                          | SNU66         | YGR188C                 | BUB1          |
| YML115C                                          | VAN1          | YOR080W                 | DIA2          |
| YDL155W                                          | CLB3          | YDL226C                 | GCS1          |
| YJR090C                                          | GRR1          | YML028W                 | TSA1          |
| YLR386W                                          | VAC14         | YLR320W                 | MMS22         |
| YLR447C                                          | VMA6          | YDR183W                 | PLP1          |
| YNL054W                                          | VAC7          | YGR270W                 | YTA7          |
| YHR160C                                          | PEX18         | YAR042W                 | SWH1          |
| YBR217W                                          | ATG12         | YJL183W                 | MNN11         |
| YML041C                                          | VPS71         | YBR089C-A               | NHP6B         |
| YMR153W                                          | NUP53         | YCR024C-A               | PMP1          |
| YOR127W                                          | RGA1          | YDR153C                 | ENT5          |
| YGL237C                                          | HAP2          | YJR135C                 | MCM22         |
| YMR224C                                          | MRE11         | YOR035C                 | SHE4          |
| YKL126W                                          | YPK1          | YLR398C                 | SKI2          |
| YPR051W                                          | MAK3          | YNL041C                 | COG6          |
| YML103C                                          | NUP188        | YNL107W                 | YAF9          |
| YOR290C                                          | SNF2          | YJL095W                 | BCK1          |
| YMR199W                                          | CLN1          | YML016C                 | PPZ1          |
| YJL095W                                          | BCK1          | YBL087C                 | RPL23A        |
| YMR055C                                          | BUB2          | YDR076W                 | RAD55         |
| YLR337C                                          | VRP1          | YMR109W                 | MYO5          |
| YOR039W                                          | CKB2          | YKL101W                 | HSL1          |
| YIL159W                                          | BNR1          | YHR039C-A               | VMA10         |
| YGL033W                                          | HOP2          | YER122C                 | GLO3          |
| YCR066W                                          | RAD18         | YHR060W                 | VMA22         |
| YLR265C                                          | NEJ1          | YGL090W                 | LIF1          |
| YNL215W                                          | IES2          | YJR140C                 | HIR3          |
| YPL129W                                          | TAF14         | YCR084C                 | TUP1          |



| Predictions at threshold level 0.75 continued... |               |                         |               |
|--------------------------------------------------|---------------|-------------------------|---------------|
| Gene1 of predicted pair                          |               | Gene2 of predicted pair |               |
| Systematic Name                                  | Standard Name | Systematic Name         | Standard Name |
| YNL325C                                          | FIG4          | YGL003C                 | CDH1          |
| YDR245W                                          | MNN10         | YMR038C                 | CCS1          |
| YKL048C                                          | ELM1          | YPR030W                 | CSR2          |
| YBL051C                                          | PIN4          | YJR135C                 | MCM22         |
| YLR058C                                          | SHM2          | YJR035W                 | RAD26         |
| YBR108W                                          | YBR108W       | YKR030W                 | GMH1          |
| YDR153C                                          | ENT5          | YAL002W                 | VPS8          |
| YMR224C                                          | MRE11         | YNR052C                 | POP2          |
| YGR105W                                          | VMA21         | YER072W                 | VTC1          |
| YLR018C                                          | POM34         | YDR076W                 | RAD55         |
| YJR060W                                          | CBF1          | YNL238W                 | KEX2          |
| YLR386W                                          | VAC14         | YJR084W                 | CSN12         |
| YPL024W                                          | RMI1          | YLR150W                 | STM1          |
| YNR072W                                          | HXT17         | YER122C                 | GLO3          |
| YCR024C-A                                        | PMP1          | YFL047W                 | RGD2          |
| YLR234W                                          | TOP3          | YDR245W                 | MNN10         |
| YJL060W                                          | BNA3          | YJR035W                 | RAD26         |
| YPR046W                                          | MCM16         | YDL226C                 | GCS1          |
| YNL229C                                          | URE2          | YPL256C                 | CLN2          |
| YBR200W                                          | BEM1          | YOR066W                 | MSA1          |
| YDR076W                                          | RAD55         | YEL056W                 | HAT2          |
| YIL053W                                          | RHR2          | YPL037C                 | EGD1          |
| YBR173C                                          | UMP1          | YGL124C                 | MON1          |
| YOR076C                                          | SKI7          | YLR135W                 | SLX4          |
| YBR171W                                          | SEC66         | YHL027W                 | RIM101        |
| YOL006C                                          | TOP1          | YHR056C                 | RSC30         |
| YFL023W                                          | BUD27         | YER139C                 | YER139C       |
| YLR094C                                          | GIS3          | YPR030W                 | CSR2          |
| YJL095W                                          | BCK1          | YHR115C                 | DMA1          |

| Predictions at threshold level 0.75 continued... |               |                         |               |
|--------------------------------------------------|---------------|-------------------------|---------------|
| Gene1 of predicted pair                          |               | Gene2 of predicted pair |               |
| Systematic Name                                  | Standard Name | Systematic Name         | Standard Name |
| YNL135C                                          | FPR1          | YKR048C                 | NAP1          |
| YGL163C                                          | RAD54         | YHR010W                 | RPL27A        |
| YEL065W                                          | SIT1          | YHR108W                 | GGA2          |
| YGL033W                                          | HOP2          | YGL003C                 | CDH1          |
| YBR065C                                          | ECM2          | YIR005W                 | IST3          |
| YDR293C                                          | SSD1          | YFL033C                 | RIM15         |
| YGR135W                                          | PRE9          | YNL116W                 | DMA2          |
| YLR360W                                          | VPS38         | YDR484W                 | VPS52         |
| YOR337W                                          | TEA1          | YDL192W                 | ARF1          |
| YDR293C                                          | SSD1          | YHL002W                 | HSE1          |
| YBR290W                                          | BSD2          | YBL051C                 | PIN4          |
| YBR200W                                          | BEM1          | YHR111W                 | UBA4          |
| YPL253C                                          | VIK1          | YLR233C                 | EST1          |
| YHR200W                                          | RPN10         | YOL121C                 | RPS19A        |
| YJR135C                                          | MCM22         | YEL056W                 | HAT2          |
| YPL152W                                          | RRD2          | YNL225C                 | CNM67         |
| YPL234C                                          | TFP3          | YML071C                 | COG8          |
| YAL024C                                          | LTE1          | YNL206C                 | RTT106        |
| YBL051C                                          | PIN4          | YAL002W                 | VPS8          |
| YBR200W                                          | BEM1          | YLR452C                 | SST2          |
| YMR125W                                          | STO1          | YGL016W                 | KAP122        |
| YLR079W                                          | SIC1          | YPL253C                 | VIK1          |
| YDR129C                                          | SAC6          | YPL213W                 | LEA1          |
| YBR289W                                          | SNF5          | YDR073W                 | SNF11         |
| YPR018W                                          | RLF2          | YDR225W                 | HTA1          |
| YLR370C                                          | ARC18         | YDR207C                 | UME6          |
| YNL288W                                          | CAF40         | YOR358W                 | HAP5          |
| YDR192C                                          | NUP42         | YDL059C                 | RAD59         |
| YHL020C                                          | OPI1          | YML001W                 | YPT7          |

| Predictions at threshold level 0.75 continued... |               |                         |               |
|--------------------------------------------------|---------------|-------------------------|---------------|
| Gene1 of predicted pair                          |               | Gene2 of predicted pair |               |
| Systematic Name                                  | Standard Name | Systematic Name         | Standard Name |
| YDL116W                                          | NUP84         | YOL126C                 | MDH2          |
| YBR108W                                          | YBR108W       | YGL253W                 | HXK2          |
| YHR013C                                          | ARD1          | YKL110C                 | KTI12         |
| YIL159W                                          | BNR1          | YHR115C                 | DMA1          |
| YDR320C                                          | SWA2          | YOR106W                 | VAM3          |
| YLR094C                                          | GIS3          | YBR036C                 | CSG2          |
| YNL288W                                          | CAF40         | YJR032W                 | CPR7          |
| YDR320C                                          | SWA2          | YER122C                 | GLO3          |
| YHR012W                                          | VPS29         | YNL127W                 | FAR11         |
| YOR332W                                          | VMA4          | YDL161W                 | ENT1          |
| YOR195W                                          | SLK19         | YDR507C                 | GIN4          |
| YLR119W                                          | SRN2          | YJL183W                 | MNN11         |
| YKR101W                                          | SIR1          | YDR310C                 | SUM1          |
| YDR076W                                          | RAD55         | YOR014W                 | RTS1          |
| YPL022W                                          | RAD1          | YFL023W                 | BUD27         |
| YGL060W                                          | YBP2          | YDL226C                 | GCS1          |
| YGR104C                                          | SRB5          | YDR335W                 | MSN5          |
| YGR241C                                          | YAP1802       | YDR129C                 | SAC6          |
| YDR477W                                          | SNF1          | YJL183W                 | MNN11         |
| YGR270W                                          | YTA7          | YJR135C                 | MCM22         |
| YBL102W                                          | SFT2          | YPL234C                 | TFP3          |
| YBL051C                                          | PIN4          | YGL253W                 | HXK2          |
| YGR249W                                          | MGA1          | YKL139W                 | CTK1          |
| YER054C                                          | GIP2          | YLR263W                 | RED1          |
| YGL249W                                          | ZIP2          | YLR394W                 | CST9          |
| YDR383C                                          | NKP1          | YNL106C                 | INP52         |
| YGL078C                                          | DBP3          | YDL192W                 | ARF1          |
| YGL134W                                          | PCL10         | YER059W                 | PCL6          |
| YDR440W                                          | DOT1          | YOR124C                 | UBP2          |

| Predictions at threshold level 0.75 continued... |               |                         |               |
|--------------------------------------------------|---------------|-------------------------|---------------|
| Gene1 of predicted pair                          |               | Gene2 of predicted pair |               |
| Systematic Name                                  | Standard Name | Systematic Name         | Standard Name |
| YBR200W                                          | BEM1          | YDR335W                 | MSN5          |
| YHR160C                                          | PEX18         | YIL160C                 | POT1          |
| YER068W                                          | MOT2          | YJL164C                 | TPK1          |
| YDR378C                                          | LSM6          | YOR038C                 | HIR2          |
| YBL008W                                          | HIR1          | YBR036C                 | CSG2          |
| YPL057C                                          | SUR1          | YEL060C                 | PRB1          |
| YOL148C                                          | SPT20         | YBR010W                 | HHT1          |
| YOR043W                                          | WHI2          | YGL151W                 | NUT1          |
| YEL053C                                          | MAK10         | YGL003C                 | CDH1          |
| YOR327C                                          | SNC2          | YCR053W                 | THR4          |
| YGL147C                                          | RPL9A         | YKL048C                 | ELM1          |
| YNL291C                                          | MID1          | YHR013C                 | ARD1          |
| YGL066W                                          | SGF73         | YKL139W                 | CTK1          |
| YBR173C                                          | UMP1          | YNL087W                 | TCB2          |
| YFR010W                                          | UBP6          | YOL054W                 | PSH1          |
| YNL032W                                          | SIW14         | YER116C                 | SLX8          |
| YLR371W                                          | ROM2          | YDR358W                 | GGA1          |
| YJR090C                                          | GRR1          | YOL067C                 | RTG1          |
| YFR031C-A                                        | RPL2A         | YOR106W                 | VAM3          |
| YPR040W                                          | TIP41         | YHR111W                 | UBA4          |
| YGL087C                                          | MMS2          | YOR312C                 | RPL20B        |
| YEL043W                                          | YEL043W       | YMR054W                 | STV1          |
| YPL112C                                          | PEX25         | YLR324W                 | PEX30         |
| YOR243C                                          | PUS7          | YPL057C                 | SUR1          |
| YLR135W                                          | SLX4          | YBL079W                 | NUP170        |
| YGL147C                                          | RPL9A         | YLR398C                 | SKI2          |
| YGR270W                                          | YTA7          | YDR440W                 | DOT1          |
| YGR003W                                          | CUL3          | YLR128W                 | DCN1          |
| YGR081C                                          | SLX9          | YPL256C                 | CLN2          |

| Predictions at threshold level 0.75 continued... |               |                         |               |
|--------------------------------------------------|---------------|-------------------------|---------------|
| Gene1 of predicted pair                          |               | Gene2 of predicted pair |               |
| Systematic Name                                  | Standard Name | Systematic Name         | Standard Name |
| YIL005W                                          | EPS1          | YJR032W                 | CPR7          |
| YNL054W                                          | VAC7          | YLR254C                 | NDL1          |
| YOR270C                                          | VPH1          | YEL051W                 | VMA8          |
| YDR329C                                          | PEX3          | YGR239C                 | PEX21         |
| YGR020C                                          | VMA7          | YPR032W                 | SRO7          |
| YDR146C                                          | SWI5          | YHL011C                 | PRS3          |
| YBR041W                                          | FAT1          | YPL089C                 | RLM1          |
| YER107C                                          | GLE2          | YNL107W                 | YAF9          |
| YGL087C                                          | MMS2          | YDL155W                 | CLB3          |
| YKR099W                                          | BAS1          | YOR066W                 | MSA1          |
| YMR095C                                          | SNO1          | YBR126C                 | TPS1          |
| YKL139W                                          | CTK1          | YBR280C                 | SAF1          |
| YDR378C                                          | LSM6          | YER161C                 | SPT2          |
| YGL003C                                          | CDH1          | YMR230W                 | RPS10B        |
| YPR084W                                          | YPR084W       | YPL120W                 | VPS30         |
| YLR360W                                          | VPS38         | YHR111W                 | UBA4          |
| YEL043W                                          | YEL043W       | YHR039C-A               | VMA10         |
| YJL210W                                          | PEX2          | YDR265W                 | PEX10         |
| YPL057C                                          | SUR1          | YKR099W                 | BAS1          |
| YDL116W                                          | NUP84         | YDR183W                 | PLP1          |
| YOR195W                                          | SLK19         | YIL103W                 | DPH1          |
| YHL027W                                          | RIM101        | YOR035C                 | SHE4          |
| YGR261C                                          | APL6          | YPL120W                 | VPS30         |
| YHR073W                                          | OSH3          | YJR059W                 | PTK2          |
| YLL007C                                          | YLL007C       | YLR337C                 | VRP1          |
| YIL076W                                          | SEC28         | YDR363W-A               | SEM1          |
| YJR135C                                          | MCM22         | YDR469W                 | SDC1          |
| YBR019C                                          | GAL10         | YJR084W                 | CSN12         |
| YNL106C                                          | INP52         | YLR315W                 | NKP2          |

| Predictions at threshold level 0.75 continued... |               |                         |               |
|--------------------------------------------------|---------------|-------------------------|---------------|
| Gene1 of predicted pair                          |               | Gene2 of predicted pair |               |
| Systematic Name                                  | Standard Name | Systematic Name         | Standard Name |
| YML115C                                          | VAN1          | YCR086W                 | CSM1          |
| YOR132W                                          | VPS17         | YPR051W                 | MAK3          |
| YDR254W                                          | CHL4          | YGL163C                 | RAD54         |
| YLR079W                                          | SIC1          | YJL157C                 | FAR1          |
| YDL002C                                          | NHP10         | YKL160W                 | ELF1          |
| YEL056W                                          | HAT2          | YGR188C                 | BUB1          |
| YKL048C                                          | ELM1          | YGL163C                 | RAD54         |
| YJL154C                                          | VPS35         | YPL195W                 | APL5          |
| YKL139W                                          | CTK1          | YDR484W                 | VPS52         |
| YBR131W                                          | CCZ1          | YPL195W                 | APL5          |
| YNL068C                                          | FKH2          | YPL256C                 | CLN2          |
| YLR337C                                          | VRP1          | YDR129C                 | SAC6          |
| YJR125C                                          | ENT3          | YDL137W                 | ARF2          |
| YBR290W                                          | BSD2          | YBR200W                 | BEM1          |
| YNL058C                                          | YNL058C       | YPL161C                 | BEM4          |
| YHR012W                                          | VPS29         | YDR144C                 | MKC7          |
| YAL024C                                          | LTE1          | YDL080C                 | THI3          |
| YPL050C                                          | MNN9          | YLR370C                 | ARC18         |
| YLR119W                                          | SRN2          | YDR207C                 | UME6          |
| YPR017C                                          | DSS4          | YFL033C                 | RIM15         |
| YNL106C                                          | INP52         | YJR140C                 | HIR3          |
| YGR249W                                          | MGA1          | YMR016C                 | SOK2          |
| YDR358W                                          | GGA1          | YJL095W                 | BCK1          |
| YJR032W                                          | CPR7          | YBR280C                 | SAF1          |
| YHL031C                                          | GOS1          | YCR077C                 | PAT1          |
| YDR439W                                          | LRS4          | YLR410W                 | VIP1          |
| YOL031C                                          | SIL1          | YMR214W                 | SCJ1          |
| YDR443C                                          | SSN2          | YNL032W                 | SIW14         |
| YPR036W                                          | VMA13         | YPL137C                 | GIP3          |

| Predictions at threshold level 0.75 continued... |               |                         |               |
|--------------------------------------------------|---------------|-------------------------|---------------|
| Gene1 of predicted pair                          |               | Gene2 of predicted pair |               |
| Systematic Name                                  | Standard Name | Systematic Name         | Standard Name |
| YGL200C                                          | EMP24         | YNL238W                 | KEX2          |
| YNL116W                                          | DMA2          | YAR014C                 | BUD14         |
| YLR093C                                          | NYV1          | YJR084W                 | CSN12         |
| YKL048C                                          | ELM1          | YAR014C                 | BUD14         |
| YLR360W                                          | VPS38         | YDR108W                 | GSG1          |
| YDL047W                                          | SIT4          | YGL031C                 | RPL24A        |
| YMR255W                                          | GFD1          | YMR273C                 | ZDS1          |
| YJL053W                                          | PEP8          | YCL037C                 | SRO9          |
| YCL032W                                          | STE50         | YHR061C                 | GIC1          |
| YFR010W                                          | UBP6          | YER144C                 | UBP5          |
| YGL135W                                          | RPL1B         | YJR084W                 | CSN12         |
| YGL066W                                          | SGF73         | YHR152W                 | SPO12         |
| YDL223C                                          | HBT1          | YDL077C                 | VAM6          |
| YNL076W                                          | MKS1          | YBR280C                 | SAF1          |
| YBR228W                                          | SLX1          | YNL248C                 | RPA49         |
| YGL212W                                          | VAM7          | YGL003C                 | CDH1          |
| YNL068C                                          | FKH2          | YDR363W-A               | SEM1          |
| YOR035C                                          | SHE4          | YMR311C                 | GLC8          |
| YIL053W                                          | RHR2          | YBR019C                 | GAL10         |
| YLL007C                                          | YLL007C       | YGR270W                 | YTA7          |
| YHR200W                                          | RPN10         | YDR071C                 | PAA1          |
| YDR254W                                          | CHL4          | YGL003C                 | CDH1          |
| YGL033W                                          | HOP2          | YLR452C                 | SST2          |
| YPL018W                                          | CTF19         | YLR032W                 | RAD5          |
| YBL021C                                          | HAP3          | YDR183W                 | PLP1          |
| YGR104C                                          | SRB5          | YJR060W                 | CBF1          |
| YML071C                                          | COG8          | YLR370C                 | ARC18         |
| YLR090W                                          | XDJ1          | YFR010W                 | UBP6          |
| YDR335W                                          | MSN5          | YNL307C                 | MCK1          |

| Predictions at threshold level 0.75 continued... |               |                         |               |
|--------------------------------------------------|---------------|-------------------------|---------------|
| Gene1 of predicted pair                          |               | Gene2 of predicted pair |               |
| Systematic Name                                  | Standard Name | Systematic Name         | Standard Name |
| YOR127W                                          | RGA1          | YDR080W                 | VPS41         |
| YNL094W                                          | APP1          | YBR108W                 | YBR108W       |
| YNL085W                                          | MKT1          | YMR127C                 | SAS2          |
| YGL078C                                          | DBP3          | YER040W                 | GLN3          |
| YHL020C                                          | OPI1          | YDR310C                 | SUM1          |
| YKL126W                                          | YPK1          | YMR311C                 | GLC8          |
| YCR081W                                          | SRB8          | YBR200W                 | BEM1          |
| YLR192C                                          | HCR1          | YDL083C                 | RPS16B        |
| YHR081W                                          | LRP1          | YER162C                 | RAD4          |
| YOL121C                                          | RPS19A        | YCR053W                 | THR4          |
| YJL036W                                          | SNX4          | YFL033C                 | RIM15         |
| YLR360W                                          | VPS38         | YEL053C                 | MAK10         |
| YDL047W                                          | SIT4          | YDL226C                 | GCS1          |
| YPR017C                                          | DSS4          | YKR030W                 | GMH1          |
| YPR131C                                          | NAT3          | YJL058C                 | BIT61         |
| YAL024C                                          | LTE1          | YMR095C                 | SNO1          |
| YPL057C                                          | SUR1          | YLR182W                 | SWI6          |
| YDR137W                                          | RGP1          | YKR099W                 | BAS1          |
| YHR205W                                          | SCH9          | YDR207C                 | UME6          |
| YER120W                                          | SCS2          | YKR030W                 | GMH1          |
| YKL048C                                          | ELM1          | YER139C                 | YER139C       |
| YAL024C                                          | LTE1          | YLR371W                 | ROM2          |
| YOR080W                                          | DIA2          | YLR313C                 | SPH1          |
| YGR217W                                          | CCH1          | YJL095W                 | BCK1          |
| YDL184C                                          | RPL41A        | YLR398C                 | SKI2          |
| YEL043W                                          | YEL043W       | YPL195W                 | APL5          |
| YOL111C                                          | MDY2          | YER044C                 | ERG28         |
| YPR051W                                          | MAK3          | YCR066W                 | RAD18         |
| YBL051C                                          | PIN4          | YGL151W                 | NUT1          |



| Predictions at threshold level 0.75 continued... |               |                         |               |
|--------------------------------------------------|---------------|-------------------------|---------------|
| Gene1 of predicted pair                          |               | Gene2 of predicted pair |               |
| Systematic Name                                  | Standard Name | Systematic Name         | Standard Name |
| YPR072W                                          | NOT5          | YKL048C                 | ELM1          |
| YPR131C                                          | NAT3          | YJR090C                 | GRR1          |
| YDL020C                                          | RPN4          | YJL176C                 | SWI3          |
| YHR205W                                          | SCH9          | YPL240C                 | HSP82         |
| YDR440W                                          | DOT1          | YBL101C                 | ECM21         |
| YPL161C                                          | BEM4          | YDL155W                 | CLB3          |
| YOR043W                                          | WHI2          | YGR188C                 | BUB1          |
| YLR292C                                          | SEC72         | YHR114W                 | BZZ1          |
| YHR200W                                          | RPN10         | YDR358W                 | GGA1          |
| YBR289W                                          | SNF5          | YDR071C                 | PAA1          |
| YPR120C                                          | CLB5          | YFR036W                 | CDC26         |
| YML016C                                          | PPZ1          | YDR245W                 | MNN10         |
| YPR018W                                          | RLF2          | YOR213C                 | SAS5          |
| YHR084W                                          | STE12         | YPR119W                 | CLB2          |
| YPR072W                                          | NOT5          | YBR289W                 | SNF5          |
| YCR066W                                          | RAD18         | YDR153C                 | ENT5          |
| YDL116W                                          | NUP84         | YGL003C                 | CDH1          |
| YDR183W                                          | PLP1          | YOL067C                 | RTG1          |
| YDR245W                                          | MNN10         | YDR076W                 | RAD55         |
| YDL042C                                          | SIR2          | YBR010W                 | HHT1          |
| YGL033W                                          | HOP2          | YBR108W                 | YBR108W       |
| YCR086W                                          | CSM1          | YNL107W                 | YAF9          |
| YDL077C                                          | VAM6          | YKR030W                 | GMH1          |
| YNL166C                                          | BNI5          | YBR114W                 | RAD16         |
| YOR197W                                          | MCA1          | YPL050C                 | MNN9          |
| YGR019W                                          | UGA1          | YMR055C                 | BUB2          |
| YMR224C                                          | MRE11         | YBL072C                 | RPS8A         |
| YHR081W                                          | LRP1          | YCR053W                 | THR4          |
| YJR060W                                          | CBF1          | YGR188C                 | BUB1          |

| Predictions at threshold level 0.75 continued... |               |                         |               |
|--------------------------------------------------|---------------|-------------------------|---------------|
| Gene1 of predicted pair                          |               | Gene2 of predicted pair |               |
| Systematic Name                                  | Standard Name | Systematic Name         | Standard Name |
| YDR335W                                          | MSN5          | YHR115C                 | DMA1          |
| YHR081W                                          | LRP1          | YLR180W                 | SAM1          |
| YCR038C                                          | BUD5          | YGL054C                 | ERV14         |
| YNL243W                                          | SLA2          | YOR327C                 | SNC2          |
| YAL024C                                          | LTE1          | YMR152W                 | YIM1          |
| YDL160C                                          | DHH1          | YPL042C                 | SSN3          |
| YPL195W                                          | APL5          | YLR309C                 | IMH1          |
| YJL154C                                          | VPS35         | YNL069C                 | RPL16B        |
| YBR107C                                          | IML3          | YMR109W                 | MYO5          |
| YOL111C                                          | MDY2          | YBR036C                 | CSG2          |
| YDL160C                                          | DHH1          | YKL101W                 | HSL1          |
| YMR199W                                          | CLN1          | YKR057W                 | RPS21A        |
| YLR309C                                          | IMH1          | YDL138W                 | RGT2          |
| YLR381W                                          | CTF3          | YDR076W                 | RAD55         |
| YGL253W                                          | HXK2          | YNL107W                 | YAF9          |
| YEL051W                                          | VMA8          | YOR327C                 | SNC2          |
| YLR381W                                          | CTF3          | YJR035W                 | RAD26         |
| YDL059C                                          | RAD59         | YBL079W                 | NUP170        |
| YDR071C                                          | PAA1          | YOR064C                 | YNG1          |
| YPL001W                                          | HAT1          | YGL151W                 | NUT1          |
| YHR014W                                          | SPO13         | YOR109W                 | INP53         |
| YPL115C                                          | BEM3          | YPL253C                 | VIK1          |
| YNL054W                                          | VAC7          | YOR141C                 | ARP8          |
| YLR315W                                          | NKP2          | YPR046W                 | MCM16         |
| YKL139W                                          | CTK1          | YJL140W                 | RPB4          |
| YMR109W                                          | MYO5          | YBR114W                 | RAD16         |
| YDR156W                                          | RPA14         | YJR135C                 | MCM22         |
| YLR386W                                          | VAC14         | YHR114W                 | BZZ1          |
| YGR249W                                          | MGA1          | YBR173C                 | UMP1          |

| Predictions at threshold level 0.75 continued... |               |                         |               |
|--------------------------------------------------|---------------|-------------------------|---------------|
| Gene1 of predicted pair                          |               | Gene2 of predicted pair |               |
| Systematic Name                                  | Standard Name | Systematic Name         | Standard Name |
| YGL066W                                          | SGF73         | YDR335W                 | MSN5          |
| YIL162W                                          | SUC2          | YBR283C                 | SSH1          |
| YKR001C                                          | VPS1          | YFL033C                 | RIM15         |
| YIL007C                                          | NAS2          | YPL112C                 | PEX25         |
| YGL124C                                          | MON1          | YLR398C                 | SKI2          |
| YGL006W                                          | PMC1          | YDR080W                 | VPS41         |
| YJL154C                                          | VPS35         | YBR127C                 | VMA2          |
| YBR084C-A                                        | RPL19A        | YGR135W                 | PRE9          |
| YOR327C                                          | SNC2          | YNR032W                 | PPG1          |
| YKL213C                                          | DOA1          | YJL095W                 | BCK1          |
| YGL147C                                          | RPL9A         | YDR358W                 | GGA1          |
| YCR024C-A                                        | PMP1          | YPL256C                 | CLN2          |
| YGR135W                                          | PRE9          | YJL095W                 | BCK1          |
| YJL004C                                          | SYS1          | YAR014C                 | BUD14         |
| YNL325C                                          | FIG4          | YER044C                 | ERG28         |
| YDR080W                                          | VPS41         | YDR153C                 | ENT5          |
| YKR035W-A                                        | DID2          | YJL183W                 | MNN11         |
| YGL087C                                          | MMS2          | YOR195W                 | SLK19         |
| YDR245W                                          | MNN10         | YDL223C                 | HBT1          |
| YOR039W                                          | CKB2          | YFR034C                 | PHO4          |
| YHR156C                                          | LIN1          | YLR370C                 | ARC18         |
| YDL192W                                          | ARF1          | YJR033C                 | RAV1          |
| YNL106C                                          | INP52         | YHR013C                 | ARD1          |
| YGR080W                                          | TWF1          | YLR429W                 | CRN1          |
| YAL024C                                          | LTE1          | YER114C                 | BOI2          |
| YBR194W                                          | SOY1          | YDR318W                 | MCM21         |
| YCR024C-A                                        | PMP1          | YKL068W                 | NUP100        |
| YLR371W                                          | ROM2          | YER139C                 | YER139C       |
| YNL236W                                          | SIN4          | YPR046W                 | MCM16         |

| Predictions at threshold level 0.75 continued... |               |                         |               |
|--------------------------------------------------|---------------|-------------------------|---------------|
| Gene1 of predicted pair                          |               | Gene2 of predicted pair |               |
| Systematic Name                                  | Standard Name | Systematic Name         | Standard Name |
| YGR142W                                          | BTN2          | YKR014C                 | YPT52         |
| YLR093C                                          | NYV1          | YGL124C                 | MON1          |
| YOR270C                                          | VPH1          | YGR105W                 | VMA21         |
| YOR124C                                          | UBP2          | YER122C                 | GLO3          |
| YJL095W                                          | BCK1          | YML097C                 | VPS9          |
| YKR061W                                          | KTR2          | YNL248C                 | RPA49         |
| YGL078C                                          | DBP3          | YER139C                 | YER139C       |
| YPL161C                                          | BEM4          | YEL053C                 | MAK10         |
| YJL154C                                          | VPS35         | YOL018C                 | TLG2          |
| YNL041C                                          | COG6          | YDL006W                 | PTC1          |
| YPL152W                                          | RRD2          | YNL107W                 | YAF9          |
| YMR198W                                          | CIK1          | YEL056W                 | HAT2          |
| YOR112W                                          | CEX1          | YNL127W                 | FAR11         |
| YLR119W                                          | SRN2          | YGR249W                 | MGA1          |
| YIR003W                                          | YIR003W       | YJL095W                 | BCK1          |
| YHR060W                                          | VMA22         | YLR094C                 | GIS3          |
| YKL116C                                          | PRR1          | YHR200W                 | RPN10         |
| YNL243W                                          | SLA2          | YJR075W                 | HOC1          |
| YBR107C                                          | IML3          | YPL152W                 | RRD2          |
| YDR289C                                          | RTT103        | YGL151W                 | NUT1          |
| YIL159W                                          | BNR1          | YGL033W                 | HOP2          |
| YGR188C                                          | BUB1          | YGL031C                 | RPL24A        |
| YBL008W                                          | HIR1          | YDR146C                 | SWI5          |
| YML001W                                          | YPT7          | YNL076W                 | MKS1          |
| YNR072W                                          | HXT17         | YPL137C                 | GIP3          |
| YIL076W                                          | SEC28         | YLR093C                 | NYV1          |
| YDR153C                                          | ENT5          | YNR006W                 | VPS27         |
| YDL155W                                          | CLB3          | YPL256C                 | CLN2          |
| YDR028C                                          | REG1          | YPR119W                 | CLB2          |

| Predictions at threshold level 0.75 continued... |               |                         |               |
|--------------------------------------------------|---------------|-------------------------|---------------|
| Gene1 of predicted pair                          |               | Gene2 of predicted pair |               |
| Systematic Name                                  | Standard Name | Systematic Name         | Standard Name |
| YKR035W-A                                        | DID2          | YBL025W                 | RRN10         |
| YDR146C                                          | SWI5          | YNL079C                 | TPM1          |
| YGR020C                                          | VMA7          | YEL053C                 | MAK10         |
| YBR194W                                          | SOY1          | YOR080W                 | DIA2          |
| YLR288C                                          | MEC3          | YJR032W                 | CPR7          |
| YGL212W                                          | VAM7          | YFR036W                 | CDC26         |
| YNL199C                                          | GCR2          | YDR310C                 | SUM1          |
| YBL051C                                          | PIN4          | YPL161C                 | BEM4          |
| YLR150W                                          | STM1          | YDL155W                 | CLB3          |
| YPR030W                                          | CSR2          | YEL060C                 | PRB1          |
| YOR109W                                          | INP53         | YPL120W                 | VPS30         |
| YIL053W                                          | RHR2          | YKL048C                 | ELM1          |
| YHR039C-A                                        | VMA10         | YHR081W                 | LRP1          |
| YNL243W                                          | SLA2          | YGR166W                 | KRE11         |
| YFL023W                                          | BUD27         | YFR036W                 | CDC26         |
| YDR174W                                          | HMO1          | YJR063W                 | RPA12         |
| YGR184C                                          | UBR1          | YPL177C                 | CUP9          |
| YBL047C                                          | EDE1          | YBR181C                 | RPS6B         |
| YGR270W                                          | YTA7          | YEL056W                 | HAT2          |
| YLR135W                                          | SLX4          | YOR243C                 | PUS7          |
| YDR174W                                          | HMO1          | YIL036W                 | CST6          |
| YEL009C                                          | GCN4          | YNR023W                 | SNF12         |
| YKR020W                                          | VPS51         | YJL095W                 | BCK1          |
| YJR040W                                          | GEF1          | YPL037C                 | EGD1          |
| YDL184C                                          | RPL41A        | YOR270C                 | VPH1          |
| YCR086W                                          | CSM1          | YJL095W                 | BCK1          |
| YKR020W                                          | VPS51         | YJL006C                 | CTK2          |
| YJL058C                                          | BIT61         | YJR005W                 | APL1          |
| YLR371W                                          | ROM2          | YHR081W                 | LRP1          |

| Predictions at threshold level 0.75 continued... |               |                         |               |
|--------------------------------------------------|---------------|-------------------------|---------------|
| Gene1 of predicted pair                          |               | Gene2 of predicted pair |               |
| Systematic Name                                  | Standard Name | Systematic Name         | Standard Name |
| YPR017C                                          | DSS4          | YHR039C-A               | VMA10         |
| YNL309W                                          | STB1          | YFR040W                 | SAP155        |
| YPL042C                                          | SSN3          | YML016C                 | PPZ1          |
| YMR273C                                          | ZDS1          | YMR125W                 | STO1          |
| YDR225W                                          | HTA1          | YCR084C                 | TUP1          |
| YLR254C                                          | NDL1          | YPL018W                 | CTF19         |
| YFR031C-A                                        | RPL2A         | YDR484W                 | VPS52         |
| YBR200W                                          | BEM1          | YBL016W                 | FUS3          |
| YMR039C                                          | SUB1          | YBR195C                 | MSI1          |
| YMR004W                                          | MVP1          | YKR001C                 | VPS1          |
| YJL053W                                          | PEP8          | YGR105W                 | VMA21         |
| YGL087C                                          | MMS2          | YFR036W                 | CDC26         |
| YKR020W                                          | VPS51         | YDL047W                 | SIT4          |
| YMR004W                                          | MVP1          | YDL192W                 | ARF1          |
| YBR107C                                          | IML3          | YGL151W                 | NUT1          |
| YNL248C                                          | RPA49         | YCR086W                 | CSM1          |
| YLR320W                                          | MMS22         | YER162C                 | RAD4          |
| YFR032C-A                                        | RPL29         | YPL161C                 | BEM4          |
| YLR292C                                          | SEC72         | YOR358W                 | HAP5          |
| YBR173C                                          | UMP1          | YGL163C                 | RAD54         |
| YPL253C                                          | VIK1          | YNL116W                 | DMA2          |
| YFL023W                                          | BUD27         | YLR441C                 | RPS1A         |
| YDL223C                                          | HBT1          | YCR053W                 | THR4          |
| YNL032W                                          | SIW14         | YOR290C                 | SNF2          |
| YHL020C                                          | OPI1          | YDL006W                 | PTC1          |
| YOR290C                                          | SNF2          | YJR056C                 | YJR056C       |
| YPR046W                                          | MCM16         | YOR141C                 | ARP8          |
| YOR270C                                          | VPH1          | YLR398C                 | SKI2          |
| YOR337W                                          | TEA1          | YHR081W                 | LRP1          |

| Predictions at threshold level 0.75 continued... |               |                         |               |
|--------------------------------------------------|---------------|-------------------------|---------------|
| Gene1 of predicted pair                          |               | Gene2 of predicted pair |               |
| Systematic Name                                  | Standard Name | Systematic Name         | Standard Name |
| YDR153C                                          | ENT5          | YAR014C                 | BUD14         |
| YDR293C                                          | SSD1          | YER068W                 | MOT2          |
| YNR052C                                          | POP2          | YJL187C                 | SWE1          |
| YMR026C                                          | PEX12         | YLR093C                 | NYV1          |
| YDL223C                                          | HBT1          | YLR371W                 | ROM2          |
| YGL124C                                          | MON1          | YOR208W                 | PTP2          |
| YKR020W                                          | VPS51         | YLR370C                 | ARC18         |
| YKL160W                                          | ELF1          | YMR038C                 | CCS1          |
| YKL129C                                          | MYO3          | YOR247W                 | SRL1          |
| YGL212W                                          | VAM7          | YMR216C                 | SKY1          |
| YNL288W                                          | CAF40         | YDR155C                 | CPR1          |
| YHR013C                                          | ARD1          | YHR108W                 | GGA2          |
| YDL160C                                          | DHH1          | YPL178W                 | CBC2          |
| YPL024W                                          | RMI1          | YPR119W                 | CLB2          |
| YLR441C                                          | RPS1A         | YJR032W                 | CPR7          |
| YMR026C                                          | PEX12         | YGL025C                 | PGD1          |
| YBR200W                                          | BEM1          | YNL116W                 | DMA2          |
| YGL078C                                          | DBP3          | YBR036C                 | CSG2          |
| YGR249W                                          | MGA1          | YNL087W                 | TCB2          |
| YML115C                                          | VAN1          | YGL115W                 | SNF4          |
| YJL006C                                          | CTK2          | YGR188C                 | BUB1          |
| YBR131W                                          | CCZ1          | YKL119C                 | VPH2          |
| YDR144C                                          | MKC7          | YJR032W                 | CPR7          |
| YMR039C                                          | SUB1          | YHR039C-A               | VMA10         |
| YMR172W                                          | HOT1          | YLR360W                 | VPS38         |
| YNL166C                                          | BNI5          | YDR144C                 | MKC7          |
| YOR033C                                          | EXO1          | YLR288C                 | MEC3          |
| YIL008W                                          | URM1          | YGL124C                 | MON1          |
| YIR005W                                          | IST3          | YGR188C                 | BUB1          |

| Predictions at threshold level 0.75 continued... |               |                         |               |
|--------------------------------------------------|---------------|-------------------------|---------------|
| Gene1 of predicted pair                          |               | Gene2 of predicted pair |               |
| Systematic Name                                  | Standard Name | Systematic Name         | Standard Name |
| YLR094C                                          | GIS3          | YLR398C                 | SKI2          |
| YBR108W                                          | YBR108W       | YHR016C                 | YSC84         |
| YNR049C                                          | MSO1          | YAL030W                 | SNC1          |
| YIL160C                                          | POT1          | YGL153W                 | PEX14         |
| YDR174W                                          | HMO1          | YLR079W                 | SIC1          |
| YMR116C                                          | ASC1          | YCR086W                 | CSM1          |
| YDL116W                                          | NUP84         | YDR254W                 | CHL4          |
| YDL047W                                          | SIT4          | YNL107W                 | YAF9          |
| YMR216C                                          | SKY1          | YNL127W                 | FAR11         |
| YNL199C                                          | GCR2          | YCR077C                 | PAT1          |
| YGL078C                                          | DBP3          | YMR214W                 | SCJ1          |
| YNL325C                                          | FIG4          | YJR084W                 | CSN12         |
| YDR225W                                          | HTA1          | YLR150W                 | STM1          |
| YDL002C                                          | NHP10         | YLR182W                 | SWI6          |
| YEL009C                                          | GCN4          | YGR104C                 | SRB5          |
| YEL053C                                          | MAK10         | YNL127W                 | FAR11         |
| YLR216C                                          | CPR6          | YBR057C                 | MUM2          |
| YML001W                                          | YPT7          | YER139C                 | YER139C       |
| YLR148W                                          | PEP3          | YGL095C                 | VPS45         |
| YPR084W                                          | YPR084W       | YFR010W                 | UBP6          |
| YBL051C                                          | PIN4          | YGR188C                 | BUB1          |
| YFL048C                                          | EMP47         | YER122C                 | GLO3          |
| YFR036W                                          | CDC26         | YOR014W                 | RTS1          |
| YBR200W                                          | BEM1          | YDR289C                 | RTT103        |
| YKR061W                                          | KTR2          | YGR188C                 | BUB1          |
| YDL077C                                          | VAM6          | YLR180W                 | SAM1          |
| YMR055C                                          | BUB2          | YCR031C                 | RPS14A        |
| YOR069W                                          | VPS5          | YEL043W                 | YEL043W       |
| YML103C                                          | NUP188        | YDL059C                 | RAD59         |



| Predictions at threshold level 0.75 continued... |               |                         |               |
|--------------------------------------------------|---------------|-------------------------|---------------|
| Gene1 of predicted pair                          |               | Gene2 of predicted pair |               |
| Systematic Name                                  | Standard Name | Systematic Name         | Standard Name |
| YMR142C                                          | RPL13B        | YPL195W                 | APL5          |
| YLL039C                                          | UBI4          | YNL079C                 | TPM1          |
| YJL176C                                          | SWI3          | YNR023W                 | SNF12         |
| YJL006C                                          | CTK2          | YJL095W                 | BCK1          |
| YBR107C                                          | IML3          | YDR378C                 | LSM6          |
| YBR274W                                          | CHK1          | YLR435W                 | TSR2          |
| YLR216C                                          | CPR6          | YOR208W                 | PTP2          |
| YPL240C                                          | HSP82         | YOR180C                 | DCI1          |
| YKL213C                                          | DOA1          | YOR308C                 | SNU66         |
| YNR052C                                          | POP2          | YHR013C                 | ARD1          |
| YDR443C                                          | SSN2          | YHR205W                 | SCH9          |
| YLR399C                                          | BDF1          | YCR084C                 | TUP1          |
| YNL248C                                          | RPA49         | YJR135C                 | MCM22         |
| YOR290C                                          | SNF2          | YMR311C                 | GLC8          |
| YDL116W                                          | NUP84         | YMR231W                 | PEP5          |
| YLR093C                                          | NYV1          | YML028W                 | TSA1          |
| YMR080C                                          | NAM7          | YCL037C                 | SRO9          |
| YNL032W                                          | SIW14         | YKR099W                 | BAS1          |
| YKR020W                                          | VPS51         | YDR207C                 | UME6          |
| YDR363W-A                                        | SEM1          | YGR270W                 | YTA7          |
| YCR020C-A                                        | MAK31         | YPL120W                 | VPS30         |
| YCL037C                                          | SRO9          | YER122C                 | GLO3          |
| YLR119W                                          | SRN2          | YBL025W                 | RRN10         |
| YLR150W                                          | STM1          | YOR014W                 | RTS1          |
| YDR261C                                          | EXG2          | YMR230W                 | RPS10B        |
| YJL154C                                          | VPS35         | YLR447C                 | VMA6          |
| YCL067C                                          | HMLALPHA2     | YML099C                 | ARG81         |
| YOR035C                                          | SHE4          | YDR310C                 | SUM1          |
| YGR135W                                          | PRE9          | YPL018W                 | CTF19         |

| Predictions at threshold level 0.75 continued... |               |                         |               |
|--------------------------------------------------|---------------|-------------------------|---------------|
| Gene1 of predicted pair                          |               | Gene2 of predicted pair |               |
| Systematic Name                                  | Standard Name | Systematic Name         | Standard Name |
| YBR127C                                          | VMA2          | YOR035C                 | SHE4          |
| YKR020W                                          | VPS51         | YDL155W                 | CLB3          |
| YLR337C                                          | VRP1          | YKL129C                 | MYO3          |
| YLR452C                                          | SST2          | YDL077C                 | VAM6          |
| YLR234W                                          | TOP3          | YBR107C                 | IML3          |
| YDL116W                                          | NUP84         | YOR141C                 | ARP8          |
| YMR109W                                          | MYO5          | YJL095W                 | BCK1          |
| YKL034W                                          | TUL1          | YBR082C                 | UBC4          |
| YJR140C                                          | HIR3          | YDL002C                 | NHP10         |
| YLR447C                                          | VMA6          | YDR318W                 | MCM21         |
| YBR217W                                          | ATG12         | YMR214W                 | SCJ1          |
| YNL206C                                          | RTT106        | YPL018W                 | CTF19         |
| YNL215W                                          | IES2          | YJR135C                 | MCM22         |
| YPL046C                                          | ELC1          | YDR422C                 | SIP1          |
| YBR173C                                          | UMP1          | YKL139W                 | CTK1          |
| YLR018C                                          | POM34         | YJR090C                 | GRR1          |
| YGR104C                                          | SRB5          | YPL248C                 | GAL4          |
| YPL037C                                          | EGD1          | YDL077C                 | VAM6          |
| YML095C                                          | RAD10         | YOR275C                 | RIM20         |
| YLR381W                                          | CTF3          | YDR254W                 | CHL4          |
| YNL297C                                          | MON2          | YLR309C                 | IMH1          |
| YFR010W                                          | UBP6          | YER116C                 | SLX8          |
| YPL042C                                          | SSN3          | YPL129W                 | TAF14         |
| YDL116W                                          | NUP84         | YGR059W                 | SPR3          |
| YHR081W                                          | LRP1          | YMR230W                 | RPS10B        |
| YBL058W                                          | SHP1          | YER122C                 | GLO3          |
| YPL022W                                          | RAD1          | YHR010W                 | RPL27A        |
| YOR106W                                          | VAM3          | YPL253C                 | VIK1          |
| YGL066W                                          | SGF73         | YBR173C                 | UMP1          |

| Predictions at threshold level 0.75 continued... |               |                         |               |
|--------------------------------------------------|---------------|-------------------------|---------------|
| Gene1 of predicted pair                          |               | Gene2 of predicted pair |               |
| Systematic Name                                  | Standard Name | Systematic Name         | Standard Name |
| YDR146C                                          | SWI5          | YDR456W                 | NHX1          |
| YNL238W                                          | KEX2          | YJR084W                 | CSN12         |
| YDL127W                                          | PCL2          | YKR001C                 | VPS1          |
| YKR061W                                          | KTR2          | YPL018W                 | CTF19         |
| YOR076C                                          | SKI7          | YOR243C                 | PUS7          |
| YDL065C                                          | PEX19         | YLR043C                 | TRX1          |
| YLR337C                                          | VRP1          | YGL087C                 | MMS2          |
| YJL172W                                          | CPS1          | YMR230W                 | RPS10B        |
| YDR443C                                          | SSN2          | YMR214W                 | SCJ1          |
| YJR135C                                          | MCM22         | YLR254C                 | NDL1          |
| YNL087W                                          | TCB2          | YGL003C                 | CDH1          |
| YPL024W                                          | RMI1          | YKL114C                 | APN1          |
| YGR268C                                          | HUA1          | YLR064W                 | YLR064W       |
| YOR096W                                          | RPS7A         | YBL071W-A               | KTI11         |
| YOR290C                                          | SNF2          | YER122C                 | GLO3          |
| YML115C                                          | VAN1          | YDR358W                 | GGA1          |
| YOR069W                                          | VPS5          | YMR216C                 | SKY1          |
| YJL176C                                          | SWI3          | YKR020W                 | VPS51         |
| YBR200W                                          | BEM1          | YML001W                 | YPT7          |
| YBL021C                                          | HAP3          | YPR046W                 | MCM16         |
| YEL065W                                          | SIT1          | YEL053C                 | MAK10         |
| YER120W                                          | SCS2          | YER162C                 | RAD4          |
| YDR179C                                          | CSN9          | YOL117W                 | RRI2          |
| YAL020C                                          | ATS1          | YPR040W                 | TIP41         |
| YJL154C                                          | VPS35         | YJR060W                 | CBF1          |
| YGR261C                                          | APL6          | YML001W                 | YPT7          |
| YAL024C                                          | LTE1          | YJR035W                 | RAD26         |
| YDL116W                                          | NUP84         | YDL047W                 | SIT4          |
| YKL025C                                          | PAN3          | YER110C                 | KAP123        |

| Predictions at threshold level 0.75 continued... |               |                         |               |
|--------------------------------------------------|---------------|-------------------------|---------------|
| Gene1 of predicted pair                          |               | Gene2 of predicted pair |               |
| Systematic Name                                  | Standard Name | Systematic Name         | Standard Name |
| YLL039C                                          | UBI4          | YFR036W                 | CDC26         |
| YKL048C                                          | ELM1          | YOR141C                 | ARP8          |
| YLR337C                                          | VRP1          | YDR378C                 | LSM6          |
| YPL105C                                          | YPL105C       | YAL002W                 | VPS8          |
| YKL139W                                          | CTK1          | YLR386W                 | VAC14         |
| YOR304W                                          | ISW2          | YML099C                 | ARG81         |
| YBR200W                                          | BEM1          | YOR008C                 | SLG1          |
| YLR119W                                          | SRN2          | YNL041C                 | COG6          |
| YHR060W                                          | VMA22         | YLR371W                 | ROM2          |
| YDR155C                                          | CPR1          | YDR310C                 | SUM1          |
| YGR020C                                          | VMA7          | YKR030W                 | GMH1          |
| YER044C                                          | ERG28         | YMR214W                 | SCJ1          |
| YIL053W                                          | RHR2          | YJL095W                 | BCK1          |
| YDR477W                                          | SNF1          | YGL025C                 | PGD1          |
| YDR329C                                          | PEX3          | YNL214W                 | PEX17         |
| YDR293C                                          | SSD1          | YOR106W                 | VAM3          |
| YAL024C                                          | LTE1          | YIL034C                 | CAP2          |
| YER118C                                          | SHO1          | YMR089C                 | YTA12         |
| YIL076W                                          | SEC28         | YGR020C                 | VMA7          |
| YLR441C                                          | RPS1A         | YBR171W                 | SEC66         |
| YDR293C                                          | SSD1          | YNL206C                 | RTT106        |
| YLR386W                                          | VAC14         | YOR127W                 | RGA1          |
| YMR153W                                          | NUP53         | YMR152W                 | YIM1          |
| YCR031C                                          | RPS14A        | YLR350W                 | ORM2          |
| YBR036C                                          | CSG2          | YEL060C                 | PRB1          |
| YPL024W                                          | RMI1          | YGR072W                 | UPF3          |
| YPR171W                                          | BSP1          | YER118C                 | SHO1          |
| YKR072C                                          | SIS2          | YLR234W                 | TOP3          |
| YKL116C                                          | PRR1          | YPR036W                 | VMA13         |

| Predictions at threshold level 0.75 continued... |               |                         |               |
|--------------------------------------------------|---------------|-------------------------|---------------|
| Gene1 of predicted pair                          |               | Gene2 of predicted pair |               |
| Systematic Name                                  | Standard Name | Systematic Name         | Standard Name |
| YOR127W                                          | RGA1          | YJL187C                 | SWE1          |
| YMR198W                                          | CIK1          | YER118C                 | SHO1          |
| YIL076W                                          | SEC28         | YOR290C                 | SNF2          |
| YGL060W                                          | YBP2          | YLR058C                 | SHM2          |
| YBR173C                                          | UMP1          | YCR053W                 | THR4          |
| YGL153W                                          | PEX14         | YCR077C                 | PAT1          |
| YGL190C                                          | CDC55         | YER016W                 | BIM1          |
| YJL127C                                          | SPT10         | YPR046W                 | MCM16         |
| YDR261C                                          | EXG2          | YLR398C                 | SKI2          |
| YLR386W                                          | VAC14         | YBR019C                 | GAL10         |
| YDL116W                                          | NUP84         | YGL252C                 | RTG2          |
| YDL083C                                          | RPS16B        | YJR084W                 | CSN12         |
| YNL236W                                          | SIN4          | YPL248C                 | GAL4          |
| YBR173C                                          | UMP1          | YJL172W                 | CPS1          |
| YDL223C                                          | HBT1          | YDR358W                 | GGA1          |
| YJR140C                                          | HIR3          | YLR182W                 | SWI6          |
| YKL139W                                          | CTK1          | YDL005C                 | MED2          |
| YNL199C                                          | GCR2          | YPL161C                 | BEM4          |
| YDR244W                                          | PEX5          | YDR265W                 | PEX10         |
| YAR018C                                          | KIN3          | YBL106C                 | SRO77         |
| YDR137W                                          | RGP1          | YPL137C                 | GIP3          |
| YAL024C                                          | LTE1          | YBL058W                 | SHP1          |
| YML001W                                          | YPT7          | YMR311C                 | GLC8          |
| YBL047C                                          | EDE1          | YDL155W                 | CLB3          |
| YMR153W                                          | NUP53         | YOR358W                 | HAP5          |
| YDR318W                                          | MCM21         | YNL225C                 | CNM67         |
| YIL002C                                          | INP51         | YOR035C                 | SHE4          |
| YIL053W                                          | RHR2          | YMR095C                 | SNO1          |
| YER162C                                          | RAD4          | YBR019C                 | GAL10         |

| Predictions at threshold level 0.75 continued... |               |                         |               |
|--------------------------------------------------|---------------|-------------------------|---------------|
| Gene1 of predicted pair                          |               | Gene2 of predicted pair |               |
| Systematic Name                                  | Standard Name | Systematic Name         | Standard Name |
| YMR164C                                          | MSS11         | YER110C                 | KAP123        |
| YBR108W                                          | YBR108W       | YHR081W                 | LRP1          |
| YMR095C                                          | SNO1          | YJR056C                 | YJR056C       |
| YHR073W                                          | OSH3          | YKR024C                 | DBP7          |
| YNL199C                                          | GCR2          | YER049W                 | TPA1          |
| YGL147C                                          | RPL9A         | YGL124C                 | MON1          |
| YMR055C                                          | BUB2          | YKL048C                 | ELM1          |
| YER162C                                          | RAD4          | YLR032W                 | RAD5          |
| YGL087C                                          | MMS2          | YOR023C                 | AHC1          |
| YEL053C                                          | MAK10         | YJL095W                 | BCK1          |
| YDR174W                                          | HMO1          | YDR335W                 | MSN5          |
| YDL161W                                          | ENT1          | YOR036W                 | PEP12         |
| YPL042C                                          | SSN3          | YOR141C                 | ARP8          |
| YNL135C                                          | FPR1          | YNL248C                 | RPA49         |
| YNL069C                                          | RPL16B        | YJR033C                 | RAV1          |
| YBR217W                                          | ATG12         | YOR066W                 | MSA1          |
| YBL008W                                          | HIR1          | YLR234W                 | TOP3          |
| YHL020C                                          | OPI1          | YEL043W                 | YEL043W       |
| YLR370C                                          | ARC18         | YCR053W                 | THR4          |
| YFR010W                                          | UBP6          | YGL003C                 | CDH1          |
| YJL029C                                          | VPS53         | YMR231W                 | PEP5          |
| YMR198W                                          | CIK1          | YBR107C                 | IML3          |
| YDR080W                                          | VPS41         | YJL004C                 | SYS1          |
| YDR129C                                          | SAC6          | YJL095W                 | BCK1          |
| YLR254C                                          | NDL1          | YNL107W                 | YAF9          |
| YGR261C                                          | APL6          | YLR360W                 | VPS38         |
| YPL037C                                          | EGD1          | YNL238W                 | KEX2          |
| YMR198W                                          | CIK1          | YDL226C                 | GCS1          |
| YGR040W                                          | KSS1          | YDL159W                 | STE7          |

| Predictions at threshold level 0.75 continued... |               |                         |               |
|--------------------------------------------------|---------------|-------------------------|---------------|
| Gene1 of predicted pair                          |               | Gene2 of predicted pair |               |
| Systematic Name                                  | Standard Name | Systematic Name         | Standard Name |
| YCR081W                                          | SRB8          | YHR012W                 | VPS29         |
| YKR059W                                          | TIF1          | YOR368W                 | RAD17         |
| YLR090W                                          | XDJ1          | YGL212W                 | VAM7          |
| YGR178C                                          | PBP1          | YNL085W                 | MKT1          |
| YBL008W                                          | HIR1          | YBR215W                 | HPC2          |
| YBR107C                                          | IML3          | YHR115C                 | DMA1          |
| YIL076W                                          | SEC28         | YDR310C                 | SUM1          |
| YDR383C                                          | NKP1          | YNL307C                 | MCK1          |
| YNL032W                                          | SIW14         | YLR094C                 | GIS3          |
| YML016C                                          | PPZ1          | YHR013C                 | ARD1          |
| YHR178W                                          | STB5          | YCR031C                 | RPS14A        |
| YHR134W                                          | WSS1          | YPL022W                 | RAD1          |
| YDL155W                                          | CLB3          | YGL151W                 | NUT1          |
| YPL115C                                          | BEM3          | YJL154C                 | VPS35         |
| YOR140W                                          | SFL1          | YLR371W                 | ROM2          |
| YOR043W                                          | WHI2          | YER139C                 | YER139C       |
| YDR335W                                          | MSN5          | YKL213C                 | DOA1          |
| YBL008W                                          | HIR1          | YPL129W                 | TAF14         |
| YER144C                                          | UBP5          | YDR137W                 | RGP1          |
| YDR202C                                          | RAV2          | YPL120W                 | VPS30         |
| YLR447C                                          | VMA6          | YDR310C                 | SUM1          |
| YGR270W                                          | YTA7          | YOR308C                 | SNU66         |
| YNL069C                                          | RPL16B        | YCL037C                 | SRO9          |
| YOR275C                                          | RIM20         | YKL161C                 | YKL161C       |
| YJL036W                                          | SNX4          | YMR004W                 | MVP1          |
| YDR105C                                          | TMS1          | YKR093W                 | PTR2          |
| YGL147C                                          | RPL9A         | YML001W                 | YPT7          |
| YPR018W                                          | RLF2          | YJR060W                 | CBF1          |
| YGL223C                                          | COG1          | YOL018C                 | TLG2          |

| Predictions at threshold level 0.75 continued... |               |                         |               |
|--------------------------------------------------|---------------|-------------------------|---------------|
| Gene1 of predicted pair                          |               | Gene2 of predicted pair |               |
| Systematic Name                                  | Standard Name | Systematic Name         | Standard Name |
| YOR270C                                          | VPH1          | YPR036W                 | VMA13         |
| YJR056C                                          | YJR056C       | YER122C                 | GLO3          |
| YLR095C                                          | IOC2          | YGL124C                 | MON1          |
| YPL042C                                          | SSN3          | YBR089C-A               | NHP6B         |
| YMR142C                                          | RPL13B        | YHR060W                 | VMA22         |
| YPL220W                                          | RPL1A         | YNL147W                 | LSM7          |
| YML016C                                          | PPZ1          | YGL253W                 | HXK2          |
| YBR215W                                          | HPC2          | YPL018W                 | CTF19         |
| YML115C                                          | VAN1          | YBR200W                 | BEM1          |
| YBL047C                                          | EDE1          | YKR014C                 | YPT52         |
| YLR360W                                          | VPS38         | YCR066W                 | RAD18         |
| YBR239C                                          | YBR239C       | YLR144C                 | ACF2          |
| YMR133W                                          | REC114        | YBR019C                 | GAL10         |
| YNL044W                                          | YIP3          | YGL198W                 | YIP4          |
| YCR066W                                          | RAD18         | YNR032W                 | PPG1          |
| YLR095C                                          | IOC2          | YIL076W                 | SEC28         |
| YDL020C                                          | RPN4          | YGR019W                 | UGA1          |
| YBR217W                                          | ATG12         | YGL212W                 | VAM7          |
| YPL253C                                          | VIK1          | YHR012W                 | VPS29         |
| YGL087C                                          | MMS2          | YPL253C                 | VIK1          |
| YJR135C                                          | MCM22         | YLR182W                 | SWI6          |
| YMR253C                                          | YMR253C       | YKR030W                 | GMH1          |
| YNL106C                                          | INP52         | YIR005W                 | IST3          |
| YOR195W                                          | SLK19         | YLR102C                 | APC9          |
| YOL090W                                          | MSH2          | YDR207C                 | UME6          |
| YDR378C                                          | LSM6          | YGL153W                 | PEX14         |
| YLR083C                                          | EMP70         | YJL053W                 | PEP8          |
| YLR337C                                          | VRP1          | YFR040W                 | SAP155        |
| YPL022W                                          | RAD1          | YNL248C                 | RPA49         |



| Predictions at threshold level 0.75 continued... |               |                         |               |
|--------------------------------------------------|---------------|-------------------------|---------------|
| Gene1 of predicted pair                          |               | Gene2 of predicted pair |               |
| Systematic Name                                  | Standard Name | Systematic Name         | Standard Name |
| YPR101W                                          | SNT309        | YNL147W                 | LSM7          |
| YGL133W                                          | ITC1          | YHR115C                 | DMA1          |
| YBR217W                                          | ATG12         | YBL078C                 | ATG8          |
| YDR004W                                          | RAD57         | YNL307C                 | MCK1          |
| YDR477W                                          | SNF1          | YBR200W                 | BEM1          |
| YOL147C                                          | PEX11         | YPR119W                 | CLB2          |
| YBL102W                                          | SFT2          | YDL006W                 | PTC1          |
| YOR066W                                          | MSA1          | YLR093C                 | NYV1          |
| YGR020C                                          | VMA7          | YPL234C                 | TFP3          |
| YBL103C                                          | RTG3          | YKR048C                 | NAP1          |
| YJR032W                                          | CPR7          | YDR207C                 | UME6          |
| YBR194W                                          | SOY1          | YCR086W                 | CSM1          |
| YDL059C                                          | RAD59         | YLR352W                 | YLR352W       |
| YMR202W                                          | ERG2          | YOL018C                 | TLG2          |
| YDR443C                                          | SSN2          | YIL076W                 | SEC28         |
| YCR065W                                          | HCM1          | YNL206C                 | RTT106        |
| YKL048C                                          | ELM1          | YDR155C                 | CPR1          |
| YHR152W                                          | SPO12         | YIL008W                 | URM1          |
| YBR240C                                          | THI2          | YKL160W                 | ELF1          |
| YLR095C                                          | IOC2          | YMR026C                 | PEX12         |
| YLR399C                                          | BDF1          | YBR009C                 | HHF1          |
| YHL031C                                          | GOS1          | YOL018C                 | TLG2          |
| YDR477W                                          | SNF1          | YDR137W                 | RGP1          |
| YGL133W                                          | ITC1          | YBL047C                 | EDE1          |
| YGR019W                                          | UGA1          | YGL151W                 | NUT1          |
| YBR274W                                          | CHK1          | YCR031C                 | RPS14A        |
| YEL009C                                          | GCN4          | YLR357W                 | RSC2          |
| YJL183W                                          | MNN11         | YAL002W                 | VPS8          |
| YGR238C                                          | KEL2          | YHR158C                 | KEL1          |

| Predictions at threshold level 0.75 continued... |               |                         |               |
|--------------------------------------------------|---------------|-------------------------|---------------|
| Gene1 of predicted pair                          |               | Gene2 of predicted pair |               |
| Systematic Name                                  | Standard Name | Systematic Name         | Standard Name |
| YPL161C                                          | BEM4          | YAR014C                 | BUD14         |
| YEL065W                                          | SIT1          | YGR249W                 | MGA1          |
| YEL053C                                          | MAK10         | YOL067C                 | RTG1          |
| YBR239C                                          | YBR239C       | YKR030W                 | GMH1          |
| YCL037C                                          | SRO9          | YJL187C                 | SWE1          |
| YPR084W                                          | YPR084W       | YGL115W                 | SNF4          |
| YLR150W                                          | STM1          | YPR046W                 | MCM16         |
| YBR119W                                          | MUD1          | YKL074C                 | MUD2          |
| YHR152W                                          | SPO12         | YDR363W-A               | SEM1          |
| YGL054C                                          | ERV14         | YMR054W                 | STV1          |
| YMR172W                                          | HOT1          | YJR090C                 | GRR1          |
| YLR292C                                          | SEC72         | YGL253W                 | HXK2          |
| YKL048C                                          | ELM1          | YOR035C                 | SHE4          |
| YMR198W                                          | CIK1          | YJL124C                 | LSM1          |
| YBR171W                                          | SEC66         | YNL076W                 | MKS1          |
| YGL174W                                          | BUD13         | YLR350W                 | ORM2          |
| YBL102W                                          | SFT2          | YNR032W                 | PPG1          |
| YNL248C                                          | RPA49         | YDL013W                 | SLX5          |
| YPL024W                                          | RMI1          | YPL195W                 | APL5          |
| YNL106C                                          | INP52         | YDL192W                 | ARF1          |
| YLR018C                                          | POM34         | YOL126C                 | MDH2          |
| YML115C                                          | VAN1          | YGL124C                 | MON1          |
| YDR129C                                          | SAC6          | YKL126W                 | YPK1          |
| YCL037C                                          | SRO9          | YHR077C                 | NMD2          |
| YBR108W                                          | YBR108W       | YEL056W                 | HAT2          |
| YML103C                                          | NUP188        | YLR410W                 | VIP1          |
| YLR191W                                          | PEX13         | YML035C                 | AMD1          |
| YMR109W                                          | MYO5          | YAR014C                 | BUD14         |
| YMR133W                                          | REC114        | YER122C                 | GLO3          |

| Predictions at threshold level 0.75 continued... |               |                         |               |
|--------------------------------------------------|---------------|-------------------------|---------------|
| Gene1 of predicted pair                          |               | Gene2 of predicted pair |               |
| Systematic Name                                  | Standard Name | Systematic Name         | Standard Name |
| YOR290C                                          | SNF2          | YDR207C                 | UME6          |
| YDR448W                                          | ADA2          | YFL031W                 | HAC1          |
| YOR001W                                          | RRP6          | YDL002C                 | NHP10         |
| YDR329C                                          | PEX3          | YMR026C                 | PEX12         |
| YOL067C                                          | RTG1          | YOL108C                 | INO4          |
| YGR261C                                          | APL6          | YPR051W                 | MAK3          |
| YGR072W                                          | UPF3          | YDL077C                 | VAM6          |
| YDR477W                                          | SNF1          | YHR200W                 | RPN10         |
| YER110C                                          | KAP123        | YBR017C                 | KAP104        |
| YKR001C                                          | VPS1          | YLR324W                 | PEX30         |
| YNL054W                                          | VAC7          | YDR318W                 | MCM21         |
| YDR289C                                          | RTT103        | YBR036C                 | CSG2          |
| YDR245W                                          | MNN10         | YDR335W                 | MSN5          |
| YBL058W                                          | SHP1          | YDL184C                 | RPL41A        |
| YML016C                                          | PPZ1          | YMR167W                 | MLH1          |
| YIL076W                                          | SEC28         | YDR108W                 | GSG1          |
| YLR095C                                          | IOC2          | YKL139W                 | CTK1          |
| YOR032C                                          | HMS1          | YNL289W                 | PCL1          |
| YPL105C                                          | YPL105C       | YNL127W                 | FAR11         |
| YOL051W                                          | GAL11         | YGL151W                 | NUT1          |
| YGL190C                                          | CDC55         | YMR048W                 | CSM3          |
| YNL106C                                          | INP52         | YGR188C                 | BUB1          |
| YOR327C                                          | SNC2          | YEL060C                 | PRB1          |
| YGR104C                                          | SRB5          | YGL025C                 | PGD1          |
| YOL126C                                          | MDH2          | YMR199W                 | CLN1          |
| YEL044W                                          | IES6          | YNL079C                 | TPM1          |
| YDR477W                                          | SNF1          | YLR452C                 | SST2          |
| YDL223C                                          | HBT1          | YMR214W                 | SCJ1          |
| YDL002C                                          | NHP10         | YGL163C                 | RAD54         |

| Predictions at threshold level 0.75 continued... |               |                         |               |
|--------------------------------------------------|---------------|-------------------------|---------------|
| Gene1 of predicted pair                          |               | Gene2 of predicted pair |               |
| Systematic Name                                  | Standard Name | Systematic Name         | Standard Name |
| YLR386W                                          | VAC14         | YBL051C                 | PIN4          |
| YLR292C                                          | SEC72         | YEL056W                 | HAT2          |
| YPL129W                                          | TAF14         | YPL248C                 | GAL4          |
| YBL016W                                          | FUS3          | YPL256C                 | CLN2          |
| YNL215W                                          | IES2          | YPL001W                 | HAT1          |
| YJR032W                                          | CPR7          | YJR084W                 | CSN12         |
| YBR217W                                          | ATG12         | YLR452C                 | SST2          |
| YLR386W                                          | VAC14         | YLR371W                 | ROM2          |
| YGR129W                                          | SYF2          | YMR216C                 | SKY1          |
| YFR034C                                          | PHO4          | YGR233C                 | PHO81         |
| YJL006C                                          | CTK2          | YAR014C                 | BUD14         |
| YBR019C                                          | GAL10         | YER139C                 | YER139C       |
| YGR108W                                          | CLB1          | YBR171W                 | SEC66         |
| YCR039C                                          | MATALPHA2     | YCR040W                 | MATALPHA1     |
| YMR164C                                          | MSS11         | YPL246C                 | RBD2          |
| YDL020C                                          | RPN4          | YJL095W                 | BCK1          |
| YAL051W                                          | OAF1          | YDR289C                 | RTT103        |
| YBR200W                                          | BEM1          | YKR048C                 | NAP1          |
| YMR095C                                          | SNO1          | YDL083C                 | RPS16B        |
| YIL156W                                          | UBP7          | YNR006W                 | VPS27         |
| YPL161C                                          | BEM4          | YER049W                 | TPA1          |
| YMR198W                                          | CIK1          | YDR363W-A               | SEM1          |
| YLR447C                                          | VMA6          | YPL161C                 | BEM4          |
| YNR052C                                          | POP2          | YNL031C                 | HHT2          |
| YPL001W                                          | HAT1          | YOR043W                 | WHI2          |
| YBR217W                                          | ATG12         | YEL053C                 | MAK10         |
| YBL058W                                          | SHP1          | YMR311C                 | GLC8          |
| YNL206C                                          | RTT106        | YOL081W                 | IRA2          |
| YDR245W                                          | MNN10         | YPL050C                 | MNN9          |

| Predictions at threshold level 0.75 continued... |               |                         |               |
|--------------------------------------------------|---------------|-------------------------|---------------|
| Gene1 of predicted pair                          |               | Gene2 of predicted pair |               |
| Systematic Name                                  | Standard Name | Systematic Name         | Standard Name |
| YBL058W                                          | SHP1          | YJL172W                 | CPS1          |
| YPR120C                                          | CLB5          | YGL163C                 | RAD54         |
| YLR135W                                          | SLX4          | YJL187C                 | SWE1          |
| YDR363W-A                                        | SEM1          | YLR429W                 | CRN1          |
| YBL008W                                          | HIR1          | YNL215W                 | IES2          |
| YNL248C                                          | RPA49         | YJR060W                 | CBF1          |
| YDR484W                                          | VPS52         | YDR310C                 | SUM1          |
| YPL115C                                          | BEM3          | YIL034C                 | CAP2          |
| YPL024W                                          | RMI1          | YMR153W                 | NUP53         |
| YDL020C                                          | RPN4          | YLR381W                 | CTF3          |
| YPL037C                                          | EGD1          | YPL137C                 | GIP3          |
| YGL153W                                          | PEX14         | YKL041W                 | VPS24         |
| YPL195W                                          | APL5          | YNL127W                 | FAR11         |
| YGL115W                                          | SNF4          | YBR036C                 | CSG2          |
| YPL024W                                          | RMI1          | YMR142C                 | RPL13B        |
| YLR360W                                          | VPS38         | YLR371W                 | ROM2          |
| YNL206C                                          | RTT106        | YKR057W                 | RPS21A        |
| YOR270C                                          | VPH1          | YJR032W                 | CPR7          |
| YDL223C                                          | HBT1          | YER162C                 | RAD4          |
| YBR200W                                          | BEM1          | YNL238W                 | KEX2          |
| YNL325C                                          | FIG4          | YDL192W                 | ARF1          |
| YCL067C                                          | HMLALPHA2     | YER167W                 | BCK2          |
| YDR443C                                          | SSN2          | YDR448W                 | ADA2          |
| YMR095C                                          | SNO1          | YMR133W                 | REC114        |
| YNL325C                                          | FIG4          | YHR060W                 | VMA22         |
| YDR253C                                          | MET32         | YLR254C                 | NDL1          |
| YNL053W                                          | MSG5          | YPL240C                 | HSP82         |
| YOR035C                                          | SHE4          | YGL124C                 | MON1          |
| YML016C                                          | PPZ1          | YBR119W                 | MUD1          |

| Predictions at threshold level 0.75 continued... |               |                         |               |
|--------------------------------------------------|---------------|-------------------------|---------------|
| Gene1 of predicted pair                          |               | Gene2 of predicted pair |               |
| Systematic Name                                  | Standard Name | Systematic Name         | Standard Name |
| YMR224C                                          | MRE11         | YPL129W                 | TAF14         |
| YFR010W                                          | UBP6          | YDR207C                 | UME6          |
| YEL065W                                          | SIT1          | YIL076W                 | SEC28         |
| YJL117W                                          | PHO86         | YLR320W                 | MMS22         |
| YNL106C                                          | INP52         | YDR358W                 | GGA1          |
| YKL010C                                          | UFD4          | YMR224C                 | MRE11         |
| YDR320C                                          | SWA2          | YNL051W                 | COG5          |
| YFL023W                                          | BUD27         | YER040W                 | GLN3          |
| YFL013C                                          | IES1          | YER122C                 | GLO3          |
| YGL033W                                          | HOP2          | YNL087W                 | TCB2          |
| YBR057C                                          | MUM2          | YDR245W                 | MNN10         |
| YBR278W                                          | DPB3          | YCR086W                 | CSM1          |
| YJR032W                                          | CPR7          | YLR370C                 | ARC18         |
| YJL095W                                          | BCK1          | YDL047W                 | SIT4          |
| YIL076W                                          | SEC28         | YBR030W                 | YBR030W       |
| YMR095C                                          | SNO1          | YBR200W                 | BEM1          |
| YMR224C                                          | MRE11         | YNL032W                 | SIW14         |
| YBR031W                                          | RPL4A         | YGR100W                 | MDR1          |
| YGL078C                                          | DBP3          | YMR142C                 | RPL13B        |
| YDR335W                                          | MSN5          | YDR254W                 | CHL4          |
| YNL058C                                          | YNL058C       | YHR039C-A               | VMA10         |
| YOR069W                                          | VPS5          | YNL297C                 | MON2          |
| YBR108W                                          | YBR108W       | YBR019C                 | GAL10         |
| YCL037C                                          | SRO9          | YMR038C                 | CCS1          |
| YPL234C                                          | TFP3          | YKR030W                 | GMH1          |
| YKR099W                                          | BAS1          | YML001W                 | YPT7          |
| YBR228W                                          | SLX1          | YJL187C                 | SWE1          |
| YHR149C                                          | SKG6          | YML109W                 | ZDS2          |
| YBR107C                                          | IML3          | YPL161C                 | BEM4          |

| Predictions at threshold level 0.75 continued... |               |                         |               |
|--------------------------------------------------|---------------|-------------------------|---------------|
| Gene1 of predicted pair                          |               | Gene2 of predicted pair |               |
| Systematic Name                                  | Standard Name | Systematic Name         | Standard Name |
| YLR083C                                          | EMP70         | YOR327C                 | SNC2          |
| YER110C                                          | KAP123        | YIL008W                 | URM1          |
| YCR088W                                          | ABP1          | YKR020W                 | VPS51         |
| YMR224C                                          | MRE11         | YKL041W                 | VPS24         |
| YIL159W                                          | BNR1          | YGL212W                 | VAM7          |
| YDR496C                                          | PUF6          | YER002W                 | NOP16         |
| YIL159W                                          | BNR1          | YBL103C                 | RTG3          |
| YGL163C                                          | RAD54         | YML112W                 | CTK3          |
| YIL148W                                          | RPL40A        | YKL068W                 | NUP100        |
| YKR072C                                          | SIS2          | YGR081C                 | SLX9          |
| YCR053W                                          | THR4          | YMR214W                 | SCJ1          |
| YNL107W                                          | YAF9          | YLR350W                 | ORM2          |
| YMR224C                                          | MRE11         | YPL213W                 | LEA1          |
| YDL002C                                          | NHP10         | YOR038C                 | HIR2          |
| YMR016C                                          | SOK2          | YLR094C                 | GIS3          |
| YPR189W                                          | SKI3          | YNR052C                 | POP2          |
| YIL076W                                          | SEC28         | YMR038C                 | CCS1          |
| YKL025C                                          | PAN3          | YMR127C                 | SAS2          |
| YDR202C                                          | RAV2          | YBR127C                 | VMA2          |
| YOR337W                                          | TEA1          | YOR270C                 | VPH1          |
| YDR289C                                          | RTT103        | YGL148W                 | ARO2          |
| YDR443C                                          | SSN2          | YER144C                 | UBP5          |
| YFR031C-A                                        | RPL2A         | YGR261C                 | APL6          |
| YHR081W                                          | LRP1          | YJR084W                 | CSN12         |
| YBR217W                                          | ATG12         | YLR371W                 | ROM2          |
| YJR060W                                          | CBF1          | YML001W                 | YPT7          |
| YDL116W                                          | NUP84         | YKR095W                 | MLP1          |
| YPR036W                                          | VMA13         | YML028W                 | TSA1          |
| YMR216C                                          | SKY1          | YNL051W                 | COG5          |

| Predictions at threshold level 0.75 continued... |               |                         |               |
|--------------------------------------------------|---------------|-------------------------|---------------|
| Gene1 of predicted pair                          |               | Gene2 of predicted pair |               |
| Systematic Name                                  | Standard Name | Systematic Name         | Standard Name |
| YBL008W                                          | HIR1          | YDL226C                 | GCS1          |
| YDR174W                                          | HMO1          | YNL225C                 | CNM67         |
| YCR020C-A                                        | MAK31         | YDR207C                 | UME6          |
| YKR001C                                          | VPS1          | YEL056W                 | HAT2          |
| YKL116C                                          | PRR1          | YDR477W                 | SNF1          |
| YIL034C                                          | CAP2          | YCR086W                 | CSM1          |
| YGR252W                                          | GCN5          | YFL031W                 | HAC1          |
| YML115C                                          | VAN1          | YPL161C                 | BEM4          |
| YML103C                                          | NUP188        | YBL079W                 | NUP170        |
| YJL183W                                          | MNN11         | YDL077C                 | VAM6          |
| YPL024W                                          | RMI1          | YBR200W                 | BEM1          |
| YBL008W                                          | HIR1          | YJR140C                 | HIR3          |
| YBR273C                                          | UBX7          | YKL213C                 | DOA1          |
| YPR046W                                          | MCM16         | YMR311C                 | GLC8          |
| YFR031C-A                                        | RPL2A         | YDR477W                 | SNF1          |
| YAL024C                                          | LTE1          | YOR127W                 | RGA1          |
| YLR090W                                          | XDJ1          | YPL195W                 | APL5          |
| YPL024W                                          | RMI1          | YMR214W                 | SCJ1          |
| YGL163C                                          | RAD54         | YDR318W                 | MCM21         |
| YOL111C                                          | MDY2          | YBR280C                 | SAF1          |
| YDL185W                                          | TFP1          | YDR289C                 | RTT103        |
| YML095C                                          | RAD10         | YDR207C                 | UME6          |
| YGR270W                                          | YTA7          | YJL183W                 | MNN11         |
| YJL154C                                          | VPS35         | YPR051W                 | MAK3          |
| YLR399C                                          | BDF1          | YLR357W                 | RSC2          |
| YOR127W                                          | RGA1          | YPL161C                 | BEM4          |
| YPL253C                                          | VIK1          | YIL008W                 | URM1          |
| YHR134W                                          | WSS1          | YBL051C                 | PIN4          |
| YEL053C                                          | MAK10         | YOL081W                 | IRA2          |



| Predictions at threshold level 0.75 continued... |               |                         |               |
|--------------------------------------------------|---------------|-------------------------|---------------|
| Gene1 of predicted pair                          |               | Gene2 of predicted pair |               |
| Systematic Name                                  | Standard Name | Systematic Name         | Standard Name |
| YFR031C-A                                        | RPL2A         | YCL001W                 | RER1          |
| YDL077C                                          | VAM6          | YER122C                 | GLO3          |
| YDL020C                                          | RPN4          | YBR171W                 | SEC66         |
| YBL103C                                          | RTG3          | YJR056C                 | YJR056C       |
| YPL180W                                          | TCO89         | YER118C                 | SHO1          |
| YOR112W                                          | CEX1          | YPL161C                 | BEM4          |
| YHL031C                                          | GOS1          | YGR105W                 | VMA21         |
| YMR284W                                          | YKU70         | YML028W                 | TSA1          |
| YGR249W                                          | MGA1          | YOL121C                 | RPS19A        |
| YPR036W                                          | VMA13         | YEL027W                 | CUP5          |
| YKL101W                                          | HSL1          | YCR031C                 | RPS14A        |
| YGR104C                                          | SRB5          | YBR112C                 | CYC8          |
| YBR215W                                          | HPC2          | YDR289C                 | RTT103        |
| YOR332W                                          | VMA4          | YEL027W                 | CUP5          |
| YOR043W                                          | WHI2          | YMR311C                 | GLC8          |
| YPL049C                                          | DIG1          | YBL016W                 | FUS3          |
| YJL176C                                          | SWI3          | YLR061W                 | RPL22A        |
| YPL024W                                          | RMI1          | YJR035W                 | RAD26         |
| YER139C                                          | YER139C       | YHR167W                 | THP2          |
| YGL212W                                          | VAM7          | YGL124C                 | MON1          |
| YKL110C                                          | KTI12         | YOL081W                 | IRA2          |
| YFL023W                                          | BUD27         | YDR137W                 | RGP1          |
| YKL007W                                          | CAP1          | YHR012W                 | VPS29         |
| YDR137W                                          | RGP1          | YMR133W                 | REC114        |
| YDR383C                                          | NKP1          | YLR410W                 | VIP1          |
| YMR042W                                          | ARG80         | YJR094C                 | IME1          |
| YBR171W                                          | SEC66         | YGR054W                 | YGR054W       |
| YNL051W                                          | COG5          | YDR310C                 | SUM1          |
| YFR040W                                          | SAP155        | YLR370C                 | ARC18         |

| Predictions at threshold level 0.75 continued... |               |                         |               |
|--------------------------------------------------|---------------|-------------------------|---------------|
| Gene1 of predicted pair                          |               | Gene2 of predicted pair |               |
| Systematic Name                                  | Standard Name | Systematic Name         | Standard Name |
| YJL058C                                          | BIT61         | YDL226C                 | GCS1          |
| YHR156C                                          | LIN1          | YDR207C                 | UME6          |
| YML059C                                          | NTE1          | YJR025C                 | BNA1          |
| YER068W                                          | MOT2          | YOR064C                 | YNG1          |
| YOR109W                                          | INP53         | YPL195W                 | APL5          |
| YCR020C-A                                        | MAK31         | YDR310C                 | SUM1          |
| YGL200C                                          | EMP24         | YDL006W                 | PTC1          |
| YLR234W                                          | TOP3          | YBL019W                 | APN2          |
| YGL223C                                          | COG1          | YOL112W                 | MSB4          |
| YFR031C-A                                        | RPL2A         | YOL108C                 | INO4          |
| YLR386W                                          | VAC14         | YHR111W                 | UBA4          |
| YLR315W                                          | NKP2          | YCR086W                 | CSM1          |
| YDR320C                                          | SWA2          | YJR060W                 | CBF1          |
| YER116C                                          | SLX8          | YKL126W                 | YPK1          |
| YDL192W                                          | ARF1          | YKL119C                 | VPH2          |
| YOR043W                                          | WHI2          | YGL148W                 | ARO2          |
| YGL212W                                          | VAM7          | YMR054W                 | STV1          |
| YDR174W                                          | HMO1          | YIR005W                 | IST3          |
| YLR381W                                          | CTF3          | YHL002W                 | HSE1          |
| YKR020W                                          | VPS51         | YBL101C                 | ECM21         |
| YER016W                                          | BIM1          | YER105C                 | NUP157        |
| YDL192W                                          | ARF1          | YOR036W                 | PEP12         |
| YDR443C                                          | SSN2          | YJL141C                 | YAK1          |
| YPR046W                                          | MCM16         | YHR114W                 | BZZ1          |
| YEL043W                                          | YEL043W       | YPL234C                 | TFP3          |
| YPR052C                                          | NHP6A         | YNR052C                 | POP2          |
| YPR084W                                          | YPR084W       | YNL107W                 | YAF9          |
| YOR001W                                          | RRP6          | YJR060W                 | CBF1          |
| YEL065W                                          | SIT1          | YMR152W                 | YIM1          |

| Predictions at threshold level 0.75 continued... |               |                         |               |
|--------------------------------------------------|---------------|-------------------------|---------------|
| Gene1 of predicted pair                          |               | Gene2 of predicted pair |               |
| Systematic Name                                  | Standard Name | Systematic Name         | Standard Name |
| YPR051W                                          | MAK3          | YJR040W                 | GEF1          |
| YML115C                                          | VAN1          | YDL006W                 | PTC1          |
| YHR156C                                          | LIN1          | YOR270C                 | VPH1          |
| YKR059W                                          | TIF1          | YMR167W                 | MLH1          |
| YOR106W                                          | VAM3          | YLR425W                 | TUS1          |
| YDL002C                                          | NHP10         | YDR335W                 | MSN5          |
| YPR040W                                          | TIP41         | YKR020W                 | VPS51         |
| YEL065W                                          | SIT1          | YKL126W                 | YPK1          |
| YHR119W                                          | SET1          | YLR418C                 | CDC73         |
| YLR325C                                          | RPL38         | YHR010W                 | RPL27A        |
| YDR490C                                          | PKH1          | YMR104C                 | YPK2          |
| YLR360W                                          | VPS38         | YHL031C                 | GOS1          |
| YML115C                                          | VAN1          | YDR207C                 | UME6          |
| YNL206C                                          | RTT106        | YDL013W                 | SLX5          |
| YKR001C                                          | VPS1          | YNL051W                 | COG5          |
| YDR383C                                          | NKP1          | YGR270W                 | YTA7          |
| YER120W                                          | SCS2          | YDR207C                 | UME6          |
| YCL037C                                          | SRO9          | YLR309C                 | IMH1          |
| YDL077C                                          | VAM6          | YMR214W                 | SCJ1          |
| YOR327C                                          | SNC2          | YJR084W                 | CSN12         |
| YJR058C                                          | APS2          | YJR005W                 | APL1          |
| YNL051W                                          | COG5          | YAR014C                 | BUD14         |
| YNL325C                                          | FIG4          | YOL111C                 | MDY2          |
| YEL053C                                          | MAK10         | YGL124C                 | MON1          |
| YDR443C                                          | SSN2          | YBR280C                 | SAF1          |
| YKL007W                                          | CAP1          | YGL252C                 | RTG2          |
| YLR079W                                          | SIC1          | YOR141C                 | ARP8          |
| YDR076W                                          | RAD55         | YGR188C                 | BUB1          |
| YOL111C                                          | MDY2          | YML071C                 | COG8          |

| Predictions at threshold level 0.75 continued... |               |                         |               |
|--------------------------------------------------|---------------|-------------------------|---------------|
| Gene1 of predicted pair                          |               | Gene2 of predicted pair |               |
| Systematic Name                                  | Standard Name | Systematic Name         | Standard Name |
| YCR066W                                          | RAD18         | YPR032W                 | SRO7          |
| YMR216C                                          | SKY1          | YHR060W                 | VMA22         |
| YJR024C                                          | MDE1          | YPL178W                 | CBC2          |
| YPR120C                                          | CLB5          | YMR038C                 | CCS1          |
| YER144C                                          | UBP5          | YHR081W                 | LRP1          |
| YLR180W                                          | SAM1          | YOL081W                 | IRA2          |
| YHL002W                                          | HSE1          | YNL107W                 | YAF9          |
| YDR225W                                          | HTA1          | YDL056W                 | MBP1          |
| YMR216C                                          | SKY1          | YFL033C                 | RIM15         |
| YKL110C                                          | KTI12         | YLR410W                 | VIP1          |
| YJL089W                                          | SIP4          | YDR477W                 | SNF1          |
| YBL008W                                          | HIR1          | YPL042C                 | SSN3          |
| YIL076W                                          | SEC28         | YBR108W                 | YBR108W       |
| YMR199W                                          | CLN1          | YBR171W                 | SEC66         |
| YDL184C                                          | RPL41A        | YGL003C                 | CDH1          |
| YLR386W                                          | VAC14         | YOR106W                 | VAM3          |
| YDR293C                                          | SSD1          | YDR320C                 | SWA2          |
| YHR012W                                          | VPS29         | YHL002W                 | HSE1          |
| YLR234W                                          | TOP3          | YDL185W                 | TFP1          |
| YBL021C                                          | HAP3          | YJR032W                 | CPR7          |
| YLR090W                                          | XDJ1          | YKL116C                 | PRR1          |
| YGL115W                                          | SNF4          | YJL183W                 | MNN11         |
| YGR072W                                          | UPF3          | YER120W                 | SCS2          |
| YDL083C                                          | RPS16B        | YJL095W                 | BCK1          |
| YGL115W                                          | SNF4          | YDR310C                 | SUM1          |
| YLR410W                                          | VIP1          | YML112W                 | CTK3          |
| YDR092W                                          | UBC13         | YCR066W                 | RAD18         |
| YOR033C                                          | EXO1          | YKR072C                 | SIS2          |
| YIL036W                                          | CST6          | YKL048C                 | ELM1          |

| Predictions at threshold level 0.75 continued... |               |                         |               |
|--------------------------------------------------|---------------|-------------------------|---------------|
| Gene1 of predicted pair                          |               | Gene2 of predicted pair |               |
| Systematic Name                                  | Standard Name | Systematic Name         | Standard Name |
| YJL036W                                          | SNX4          | YOR069W                 | VPS5          |
| YPR120C                                          | CLB5          | YML112W                 | CTK3          |
| YLR452C                                          | SST2          | YGL003C                 | CDH1          |
| YHR013C                                          | ARD1          | YHR200W                 | RPN10         |
| YOR001W                                          | RRP6          | YER161C                 | SPT2          |
| YBR041W                                          | FAT1          | YOR059C                 | YOR059C       |
| YGL147C                                          | RPL9A         | YNL076W                 | MKS1          |
| YMR199W                                          | CLN1          | YPL246C                 | RBD2          |
| YOL082W                                          | ATG19         | YGL156W                 | AMS1          |
| YOR127W                                          | RGA1          | YJL004C                 | SYS1          |
| YDR080W                                          | VPS41         | YEL051W                 | VMA8          |
| YMR153W                                          | NUP53         | YPL178W                 | CBC2          |
| YDR004W                                          | RAD57         | YBR107C                 | IML3          |
| YBR280C                                          | SAF1          | YDR207C                 | UME6          |
| YLL007C                                          | YLL007C       | YDR183W                 | PLP1          |
| YPL024W                                          | RMI1          | YGL175C                 | SAE2          |
| YLR079W                                          | SIC1          | YER115C                 | SPR6          |
| YNL238W                                          | KEX2          | YGR105W                 | VMA21         |
| YHR152W                                          | SPO12         | YPL256C                 | CLN2          |
| YNL093W                                          | YPT53         | YPR119W                 | CLB2          |
| YPR051W                                          | MAK3          | YDL077C                 | VAM6          |
| YAL024C                                          | LTE1          | YDR379W                 | RGA2          |
| YLR396C                                          | VPS33         | YPR028W                 | YOP1          |
| YNL106C                                          | INP52         | YGL252C                 | RTG2          |
| YNR072W                                          | HXT17         | YGL115W                 | SNF4          |
| YPR018W                                          | RLF2          | YML115C                 | VAN1          |
| YLR288C                                          | MEC3          | YHR152W                 | SPO12         |
| YPL137C                                          | GIP3          | YPR046W                 | MCM16         |
| YIL076W                                          | SEC28         | YLR386W                 | VAC14         |

| Predictions at threshold level 0.75 continued... |               |                         |               |
|--------------------------------------------------|---------------|-------------------------|---------------|
| Gene1 of predicted pair                          |               | Gene2 of predicted pair |               |
| Systematic Name                                  | Standard Name | Systematic Name         | Standard Name |
| YMR202W                                          | ERG2          | YNL289W                 | PCL1          |
| YOR033C                                          | EXO1          | YPL022W                 | RAD1          |
| YLR079W                                          | SIC1          | YNL307C                 | MCK1          |
| YOR144C                                          | ELG1          | YHR098C                 | SFB3          |
| YMR273C                                          | ZDS1          | YCR086W                 | CSM1          |
| YNR052C                                          | POP2          | YNL116W                 | DMA2          |
| YPL024W                                          | RMI1          | YNL325C                 | FIG4          |
| YLR360W                                          | VPS38         | YJR040W                 | GEF1          |
| YOR127W                                          | RGA1          | YML038C                 | YMD8          |
| YMR199W                                          | CLN1          | YOR043W                 | WHI2          |
| YAL024C                                          | LTE1          | YKL110C                 | KTI12         |
| YMR095C                                          | SNO1          | YEL053C                 | MAK10         |
| YAL024C                                          | LTE1          | YDR477W                 | SNF1          |
| YDR378C                                          | LSM6          | YKL160W                 | ELF1          |
| YLR006C                                          | SSK1          | YPL256C                 | CLN2          |
| YJR032W                                          | CPR7          | YMR214W                 | SCJ1          |
| YLR018C                                          | POM34         | YMR199W                 | CLN1          |
| YPR018W                                          | RLF2          | YNL264C                 | PDR17         |
| YIL053W                                          | RHR2          | YBR217W                 | ATG12         |
| YKL139W                                          | CTK1          | YMR311C                 | GLC8          |
| YDL083C                                          | RPS16B        | YNL238W                 | KEX2          |
| YBL101C                                          | ECM21         | YLR425W                 | TUS1          |
| YDR176W                                          | NGG1          | YLR399C                 | BDF1          |
| YFR030W                                          | MET10         | YPR046W                 | MCM16         |
| YJR084W                                          | CSN12         | YLR370C                 | ARC18         |
| YFR021W                                          | ATG18         | YDL149W                 | ATG9          |
| YMR026C                                          | PEX12         | YNL058C                 | YNL058C       |
| YBR200W                                          | BEM1          | YOR358W                 | HAP5          |
| YDL020C                                          | RPN4          | YMR179W                 | SPT21         |

| Predictions at threshold level 0.75 continued... |               |                         |               |
|--------------------------------------------------|---------------|-------------------------|---------------|
| Gene1 of predicted pair                          |               | Gene2 of predicted pair |               |
| Systematic Name                                  | Standard Name | Systematic Name         | Standard Name |
| YDR358W                                          | GGA1          | YMR230W                 | RPS10B        |
| YGL115W                                          | SNF4          | YDL077C                 | VAM6          |
| YLR182W                                          | SWI6          | YAL002W                 | VPS8          |
| YLR093C                                          | NYV1          | YDR310C                 | SUM1          |
| YIL034C                                          | CAP2          | YJL190C                 | RPS22A        |
| YGR081C                                          | SLX9          | YMR199W                 | CLN1          |
| YCR088W                                          | ABP1          | YDL226C                 | GCS1          |
| YDR363W-A                                        | SEM1          | YOL054W                 | PSH1          |
| YNL218W                                          | MGS1          | YHR077C                 | NMD2          |
| YGL178W                                          | MPT5          | YER167W                 | BCK2          |
| YMR284W                                          | YKU70         | YKL114C                 | APN1          |
| YIL160C                                          | POT1          | YNL214W                 | PEX17         |
| YKR014C                                          | YPT52         | YJL095W                 | BCK1          |
| YDL113C                                          | ATG20         | YPR049C                 | ATG11         |
| YGL161C                                          | YIP5          | YOR308C                 | SNU66         |
| YPL042C                                          | SSN3          | YDR254W                 | CHL4          |
| YLR061W                                          | RPL22A        | YKR020W                 | VPS51         |
| YDR484W                                          | VPS52         | YER044C                 | ERG28         |
| YER144C                                          | UBP5          | YMR311C                 | GLC8          |
| YBL025W                                          | RRN10         | YLR180W                 | SAM1          |
| YGL174W                                          | BUD13         | YHR167W                 | THP2          |
| YNL297C                                          | MON2          | YNL107W                 | YAF9          |
| YJL110C                                          | GZF3          | YKR034W                 | DAL80         |
| YIL156W                                          | UBP7          | YHL002W                 | HSE1          |
| YPL105C                                          | YPL105C       | YPL161C                 | BEM4          |
| YLR386W                                          | VAC14         | YDL155W                 | CLB3          |
| YLR288C                                          | MEC3          | YGL175C                 | SAE2          |
| YFR031C-A                                        | RPL2A         | YMR224C                 | MRE11         |
| YEL065W                                          | SIT1          | YDR261C                 | EXG2          |

| Predictions at threshold level 0.75 continued... |               |                         |               |
|--------------------------------------------------|---------------|-------------------------|---------------|
| Gene1 of predicted pair                          |               | Gene2 of predicted pair |               |
| Systematic Name                                  | Standard Name | Systematic Name         | Standard Name |
| YLR360W                                          | VPS38         | YGL124C                 | MON1          |
| YER116C                                          | SLX8          | YNL016W                 | PUB1          |
| YDR443C                                          | SSN2          | YNL041C                 | COG6          |
| YKR001C                                          | VPS1          | YDL077C                 | VAM6          |
| YDR004W                                          | RAD57         | YDL059C                 | RAD59         |
| YDR293C                                          | SSD1          | YHR039C-A               | VMA10         |
| YFR036W                                          | CDC26         | YBL072C                 | RPS8A         |
| YDL056W                                          | MBP1          | YPR120C                 | CLB5          |
| YGR241C                                          | YAP1802       | YJR125C                 | ENT3          |
| YOL121C                                          | RPS19A        | YLR180W                 | SAM1          |
| YDL184C                                          | RPL41A        | YOR043W                 | WHI2          |
| YBL079W                                          | NUP170        | YML028W                 | TSA1          |
| YDR484W                                          | VPS52         | YJL183W                 | MNN11         |
| YLR192C                                          | HCR1          | YBR181C                 | RPS6B         |
| YDR335W                                          | MSN5          | YJL006C                 | CTK2          |
| YMR202W                                          | ERG2          | YDR309C                 | GIC2          |
| YDR359C                                          | EAF1          | YGL190C                 | CDC55         |
| YNL238W                                          | KEX2          | YKR030W                 | GMH1          |
| YBL058W                                          | SHP1          | YOL111C                 | MDY2          |
| YMR116C                                          | ASC1          | YER116C                 | SLX8          |
| YDR320C                                          | SWA2          | YJR032W                 | CPR7          |
| YBL088C                                          | TEL1          | YJR021C                 | REC107        |
| YGL161C                                          | YIP5          | YHR200W                 | RPN10         |
| YMR095C                                          | SNO1          | YBR030W                 | YBR030W       |
| YIL076W                                          | SEC28         | YLR398C                 | SKI2          |
| YBR200W                                          | BEM1          | YBL101C                 | ECM21         |
| YIL159W                                          | BNR1          | YNL289W                 | PCL1          |
| YDR484W                                          | VPS52         | YMR311C                 | GLC8          |
| YPL090C                                          | RPS6A         | YGL246C                 | RAI1          |



| Predictions at threshold level 0.75 continued... |               |                         |               |
|--------------------------------------------------|---------------|-------------------------|---------------|
| Gene1 of predicted pair                          |               | Gene2 of predicted pair |               |
| Systematic Name                                  | Standard Name | Systematic Name         | Standard Name |
| YML102W                                          | CAC2          | YHR010W                 | RPL27A        |
| YKL025C                                          | PAN3          | YBR114W                 | RAD16         |
| YPR120C                                          | CLB5          | YLR032W                 | RAD5          |
| YPL022W                                          | RAD1          | YBR073W                 | RDH54         |
| YDR378C                                          | LSM6          | YIL103W                 | DPH1          |
| YCR063W                                          | BUD31         | YIR005W                 | IST3          |
| YJR032W                                          | CPR7          | YCR086W                 | CSM1          |
| YOR270C                                          | VPH1          | YBL103C                 | RTG3          |
| YNL032W                                          | SIW14         | YDR137W                 | RGP1          |
| YLR090W                                          | XDJ1          | YFL023W                 | BUD27         |
| YMR224C                                          | MRE11         | YDR318W                 | MCM21         |
| YNL243W                                          | SLA2          | YPL259C                 | APM1          |
| YPL057C                                          | SUR1          | YPR120C                 | CLB5          |
| YMR172W                                          | HOT1          | YDR254W                 | CHL4          |
| YCL037C                                          | SRO9          | YCL001W                 | RER1          |
| YOL148C                                          | SPT20         | YLR182W                 | SWI6          |
| YLR381W                                          | CTF3          | YGL253W                 | HXK2          |
| YOR213C                                          | SAS5          | YML097C                 | VPS9          |
| YGR019W                                          | UGA1          | YLR233C                 | EST1          |
| YLR234W                                          | TOP3          | YGL237C                 | HAP2          |
| YOR127W                                          | RGA1          | YDR183W                 | PLP1          |
| YDR440W                                          | DOT1          | YJL183W                 | MNN11         |
| YMR153W                                          | NUP53         | YPL161C                 | BEM4          |
| YLR381W                                          | CTF3          | YPR120C                 | CLB5          |
| YNL264C                                          | PDR17         | YDL006W                 | PTC1          |
| YGR019W                                          | UGA1          | YOR132W                 | VPS17         |
| YDL002C                                          | NHP10         | YCR077C                 | PAT1          |
| YDR108W                                          | GSG1          | YGL223C                 | COG1          |
| YOR066W                                          | MSA1          | YMR152W                 | YIM1          |

| Predictions at threshold level 0.75 continued... |               |                         |               |
|--------------------------------------------------|---------------|-------------------------|---------------|
| Gene1 of predicted pair                          |               | Gene2 of predicted pair |               |
| Systematic Name                                  | Standard Name | Systematic Name         | Standard Name |
| YLR447C                                          | VMA6          | YJL190C                 | RPS22A        |
| YHR156C                                          | LIN1          | YGL003C                 | CDH1          |
| YML016C                                          | PPZ1          | YCR086W                 | CSM1          |
| YBL051C                                          | PIN4          | YBR171W                 | SEC66         |
| YLR447C                                          | VMA6          | YGL151W                 | NUT1          |
| YKL048C                                          | ELM1          | YLR180W                 | SAM1          |
| YKL139W                                          | CTK1          | YIL076W                 | SEC28         |
| YHR134W                                          | WSS1          | YGL031C                 | RPL24A        |
| YDR383C                                          | NKP1          | YKL110C                 | KTI12         |
| YML001W                                          | YPT7          | YPR028W                 | YOP1          |
| YHR200W                                          | RPN10         | YGR188C                 | BUB1          |
| YGL078C                                          | DBP3          | YNR072W                 | HXT17         |
| YMR026C                                          | PEX12         | YLR192C                 | HCR1          |
| YDR293C                                          | SSD1          | YGR270W                 | YTA7          |
| YGL115W                                          | SNF4          | YMR152W                 | YIM1          |
| YOR358W                                          | HAP5          | YKL048C                 | ELM1          |
| YJR074W                                          | MOG1          | YPR119W                 | CLB2          |
| YDL116W                                          | NUP84         | YLR018C                 | POM34         |
| YJR060W                                          | CBF1          | YGL252C                 | RTG2          |
| YPR046W                                          | MCM16         | YJL190C                 | RPS22A        |
| YGR081C                                          | SLX9          | YHR010W                 | RPL27A        |
| YJR033C                                          | RAV1          | YOL108C                 | INO4          |
| YEL065W                                          | SIT1          | YGL212W                 | VAM7          |
| YGL115W                                          | SNF4          | YER120W                 | SCS2          |
| YLR292C                                          | SEC72         | YBL051C                 | PIN4          |
| YKL139W                                          | CTK1          | YNL032W                 | SIW14         |
| YDL155W                                          | CLB3          | YJL006C                 | CTK2          |
| YDR379W                                          | RGA2          | YDR363W-A               | SEM1          |
| YNL058C                                          | YNL058C       | YLR094C                 | GIS3          |

| Predictions at threshold level 0.75 continued... |               |                         |               |
|--------------------------------------------------|---------------|-------------------------|---------------|
| Gene1 of predicted pair                          |               | Gene2 of predicted pair |               |
| Systematic Name                                  | Standard Name | Systematic Name         | Standard Name |
| YLR371W                                          | ROM2          | YMR311C                 | GLC8          |
| YNL215W                                          | IES2          | YDR439W                 | LRS4          |
| YOR270C                                          | VPH1          | YDL077C                 | VAM6          |
| YMR127C                                          | SAS2          | YPR046W                 | MCM16         |
| YNL069C                                          | RPL16B        | YNL238W                 | KEX2          |
| YJR060W                                          | CBF1          | YNL225C                 | CNM67         |
| YMR224C                                          | MRE11         | YLR079W                 | SIC1          |
| YIL076W                                          | SEC28         | YAR014C                 | BUD14         |
| YOL051W                                          | GAL11         | YJL140W                 | RPB4          |
| YBR126C                                          | TPS1          | YLR386W                 | VAC14         |
| YLR371W                                          | ROM2          | YPR030W                 | CSR2          |
| YLR095C                                          | IOC2          | YFL023W                 | BUD27         |
| YGL212W                                          | VAM7          | YEL060C                 | PRB1          |
| YDR080W                                          | VPS41         | YEL043W                 | YEL043W       |
| YCR034W                                          | FEN1          | YBR274W                 | CHK1          |
| YGL003C                                          | CDH1          | YER040W                 | GLN3          |
| YBR200W                                          | BEM1          | YHL027W                 | RIM101        |
| YNL238W                                          | KEX2          | YLR370C                 | ARC18         |
| YGL115W                                          | SNF4          | YGL124C                 | MON1          |
| YNL087W                                          | TCB2          | YMR311C                 | GLC8          |
| YNL032W                                          | SIW14         | YOL111C                 | MDY2          |
| YLL039C                                          | UBI4          | YCR077C                 | PAT1          |
| YJL176C                                          | SWI3          | YLR135W                 | SLX4          |
| YJL124C                                          | LSM1          | YDR137W                 | RGP1          |
| YGL212W                                          | VAM7          | YER044C                 | ERG28         |
| YIL159W                                          | BNR1          | YLR320W                 | MMS22         |
| YGL212W                                          | VAM7          | YKL048C                 | ELM1          |
| YDR378C                                          | LSM6          | YOL054W                 | PSH1          |
| YLR288C                                          | MEC3          | YLR350W                 | ORM2          |

| Predictions at threshold level 0.75 continued... |               |                         |               |
|--------------------------------------------------|---------------|-------------------------|---------------|
| Gene1 of predicted pair                          |               | Gene2 of predicted pair |               |
| Systematic Name                                  | Standard Name | Systematic Name         | Standard Name |
| YHR200W                                          | RPN10         | YKL160W                 | ELF1          |
| YNL325C                                          | FIG4          | YPR046W                 | MCM16         |
| YOL111C                                          | MDY2          | YGL003C                 | CDH1          |
| YGR261C                                          | APL6          | YML038C                 | YMD8          |
| YNR052C                                          | POP2          | YOL054W                 | PSH1          |
| YOR127W                                          | RGA1          | YIL008W                 | URM1          |
| YBR215W                                          | HPC2          | YOR308C                 | SNU66         |
| YDR225W                                          | HTA1          | YDR076W                 | RAD55         |
| YBL102W                                          | SFT2          | YMR054W                 | STV1          |
| YJL154C                                          | VPS35         | YGL124C                 | MON1          |
| YKL116C                                          | PRR1          | YLR093C                 | NYV1          |
| YFR031C-A                                        | RPL2A         | YBR280C                 | SAF1          |
| YPR131C                                          | NAT3          | YPL022W                 | RAD1          |
| YMR116C                                          | ASC1          | YHR013C                 | ARD1          |
| YGR241C                                          | YAP1802       | YHR161C                 | YAP1801       |
| YCR066W                                          | RAD18         | YGR105W                 | VMA21         |
| YNL206C                                          | RTT106        | YGR184C                 | UBR1          |
| YML016C                                          | PPZ1          | YJL190C                 | RPS22A        |
| YDR108W                                          | GSG1          | YOL018C                 | TLG2          |
| YKR035W-A                                        | DID2          | YDR310C                 | SUM1          |
| YBR200W                                          | BEM1          | YHR012W                 | VPS29         |
| YGL223C                                          | COG1          | YCL001W                 | RER1          |
| YDR254W                                          | CHL4          | YNL225C                 | CNM67         |
| YGL190C                                          | CDC55         | YDL194W                 | SNF3          |
| YDR174W                                          | HMO1          | YPL018W                 | CTF19         |
| YPL024W                                          | RMI1          | YCR077C                 | PAT1          |
| YHR134W                                          | WSS1          | YMR116C                 | ASC1          |
| YIL076W                                          | SEC28         | YLR315W                 | NKP2          |
| YLR079W                                          | SIC1          | YCR024C-A               | PMP1          |

| Predictions at threshold level 0.75 continued... |               |                         |               |
|--------------------------------------------------|---------------|-------------------------|---------------|
| Gene1 of predicted pair                          |               | Gene2 of predicted pair |               |
| Systematic Name                                  | Standard Name | Systematic Name         | Standard Name |
| YPL161C                                          | BEM4          | YNL041C                 | COG6          |
| YPR084W                                          | YPR084W       | YCL001W                 | RER1          |
| YOR069W                                          | VPS5          | YNL238W                 | KEX2          |
| YER044C-A                                        | MEI4          | YJR021C                 | REC107        |
| YML095C                                          | RAD10         | YJL183W                 | MNN11         |
| YHR134W                                          | WSS1          | YPL253C                 | VIK1          |
| YGL087C                                          | MMS2          | YBR057C                 | MUM2          |
| YAL024C                                          | LTE1          | YCR077C                 | PAT1          |
| YOR071C                                          | THI71         | YKR093W                 | PTR2          |
| YLR386W                                          | VAC14         | YJL187C                 | SWE1          |
| YOR243C                                          | PUS7          | YHR077C                 | NMD2          |
| YGL212W                                          | VAM7          | YDL006W                 | PTC1          |
| YBL058W                                          | SHP1          | YBL025W                 | RRN10         |
| YNL215W                                          | IES2          | YBR107C                 | IML3          |
| YMR026C                                          | PEX12         | YMR311C                 | GLC8          |
| YKR001C                                          | VPS1          | YOR275C                 | RIM20         |
| YML016C                                          | PPZ1          | YDL006W                 | PTC1          |
| YKL048C                                          | ELM1          | YDL155W                 | CLB3          |
| YKL110C                                          | KTI12         | YIL103W                 | DPH1          |
| YDL184C                                          | RPL41A        | YPL057C                 | SUR1          |
| YDR309C                                          | GIC2          | YCR077C                 | PAT1          |
| YGL153W                                          | PEX14         | YJL183W                 | MNN11         |
| YGR239C                                          | PEX21         | YDR244W                 | PEX5          |
| YLR090W                                          | XDJ1          | YOR327C                 | SNC2          |
| YNL094W                                          | APP1          | YPL246C                 | RBD2          |
| YPR018W                                          | RLF2          | YMR224C                 | MRE11         |
| YLR320W                                          | MMS22         | YLR398C                 | SKI2          |
| YGL078C                                          | DBP3          | YMR152W                 | YIM1          |
| YBR065C                                          | ECM2          | YJR050W                 | ISY1          |

| Predictions at threshold level 0.75 continued... |               |                         |               |
|--------------------------------------------------|---------------|-------------------------|---------------|
| Gene1 of predicted pair                          |               | Gene2 of predicted pair |               |
| Systematic Name                                  | Standard Name | Systematic Name         | Standard Name |
| YLR192C                                          | HCR1          | YHR156C                 | LIN1          |
| YER110C                                          | KAP123        | YMR055C                 | BUB2          |
| YJL172W                                          | CPS1          | YML071C                 | COG8          |
| YML115C                                          | VAN1          | YDL223C                 | HBT1          |
| YBR200W                                          | BEM1          | YDR318W                 | MCM21         |
| YLR386W                                          | VAC14         | YLR093C                 | NYV1          |
| YLR095C                                          | IOC2          | YMR153W                 | NUP53         |
| YJR135C                                          | MCM22         | YGL124C                 | MON1          |
| YMR198W                                          | CIK1          | YGL163C                 | RAD54         |
| YNL215W                                          | IES2          | YBR194W                 | SOY1          |
| YNL325C                                          | FIG4          | YHR200W                 | RPN10         |
| YJL053W                                          | PEP8          | YCR066W                 | RAD18         |
| YDR146C                                          | SWI5          | YJL124C                 | LSM1          |
| YPR120C                                          | CLB5          | YHR039C-A               | VMA10         |
| YJL060W                                          | BNA3          | YPL106C                 | SSE1          |
| YLR192C                                          | HCR1          | YBR108W                 | YBR108W       |
| YGR249W                                          | MGA1          | YDL077C                 | VAM6          |
| YER162C                                          | RAD4          | YPR046W                 | MCM16         |
| YFL023W                                          | BUD27         | YBR019C                 | GAL10         |
| YOR069W                                          | VPS5          | YOR036W                 | PEP12         |
| YER120W                                          | SCS2          | YJR033C                 | RAV1          |
| YBR171W                                          | SEC66         | YER040W                 | GLN3          |
| YOR106W                                          | VAM3          | YER162C                 | RAD4          |
| YKL048C                                          | ELM1          | YPR119W                 | CLB2          |
| YML109W                                          | ZDS2          | YBR010W                 | HHT1          |
| YNL041C                                          | COG6          | YDR318W                 | MCM21         |
| YDR318W                                          | MCM21         | YKL114C                 | APN1          |
| YBL058W                                          | SHP1          | YJR084W                 | CSN12         |
| YJR032W                                          | CPR7          | YCR031C                 | RPS14A        |

| Predictions at threshold level 0.75 continued... |               |                         |               |
|--------------------------------------------------|---------------|-------------------------|---------------|
| Gene1 of predicted pair                          |               | Gene2 of predicted pair |               |
| Systematic Name                                  | Standard Name | Systematic Name         | Standard Name |
| YMR055C                                          | BUB2          | YPL018W                 | CTF19         |
| YLR360W                                          | VPS38         | YOR327C                 | SNC2          |
| YKL032C                                          | IXR1          | YOR275C                 | RIM20         |
| YBR290W                                          | BSD2          | YML057W                 | CMP2          |
| YNR072W                                          | HXT17         | YHR039C-A               | VMA10         |
| YDL223C                                          | HBT1          | YGL124C                 | MON1          |
| YDR254W                                          | CHL4          | YGL253W                 | HXK2          |
| YMR284W                                          | YKU70         | YEL056W                 | HAT2          |
| YBR041W                                          | FAT1          | YPR119W                 | CLB2          |
| YPL001W                                          | HAT1          | YOR038C                 | HIR2          |
| YOR191W                                          | RIS1          | YFR010W                 | UBP6          |
| YMR095C                                          | SNO1          | YBR108W                 | YBR108W       |
| YFL013C                                          | IES1          | YNL199C                 | GCR2          |
| YPL018W                                          | CTF19         | YGR188C                 | BUB1          |
| YER001W                                          | MNN1          | YBL047C                 | EDE1          |
| YER139C                                          | YER139C       | YDL077C                 | VAM6          |
| YLR447C                                          | VMA6          | YEL053C                 | MAK10         |
| YNL106C                                          | INP52         | YDR289C                 | RTT103        |
| YLR090W                                          | XDJ1          | YML001W                 | YPT7          |
| YNL079C                                          | TPM1          | YBL101C                 | ECM21         |
| YDR146C                                          | SWI5          | YJL095W                 | BCK1          |
| YOR023C                                          | AHC1          | YHR114W                 | BZZ1          |
| YNL236W                                          | SIN4          | YDL047W                 | SIT4          |
| YNL032W                                          | SIW14         | YDR484W                 | VPS52         |
| YNL054W                                          | VAC7          | YFR030W                 | MET10         |
| YDR174W                                          | HMO1          | YNL107W                 | YAF9          |
| YER162C                                          | RAD4          | YNL107W                 | YAF9          |
| YLL007C                                          | YLL007C       | YOR358W                 | HAP5          |
| YGL078C                                          | DBP3          | YER162C                 | RAD4          |

| Predictions at threshold level 0.75 continued... |               |                         |               |
|--------------------------------------------------|---------------|-------------------------|---------------|
| Gene1 of predicted pair                          |               | Gene2 of predicted pair |               |
| Systematic Name                                  | Standard Name | Systematic Name         | Standard Name |
| YOR290C                                          | SNF2          | YOR035C                 | SHE4          |
| YLR370C                                          | ARC18         | YBR280C                 | SAF1          |
| YGL060W                                          | YBP2          | YDR200C                 | VPS64         |
| YBR173C                                          | UMP1          | YOR195W                 | SLK19         |
| YLR192C                                          | HCR1          | YML097C                 | VPS9          |
| YJL154C                                          | VPS35         | YHR111W                 | UBA4          |
| YJR140C                                          | HIR3          | YIR005W                 | IST3          |
| YGR104C                                          | SRB5          | YGR089W                 | NNF2          |
| YEL065W                                          | SIT1          | YGL115W                 | SNF4          |
| YHL031C                                          | GOS1          | YML012W                 | ERV25         |
| YGL135W                                          | RPL1B         | YGL200C                 | EMP24         |
| YOR127W                                          | RGA1          | YOR023C                 | AHC1          |
| YGR108W                                          | CLB1          | YDR183W                 | PLP1          |
| YEL065W                                          | SIT1          | YLR371W                 | ROM2          |
| YBR019C                                          | GAL10         | YDL077C                 | VAM6          |
| YNL032W                                          | SIW14         | YJL172W                 | CPS1          |
| YMR016C                                          | SOK2          | YCR053W                 | THR4          |
| YOR312C                                          | RPL20B        | YGR135W                 | PRE9          |
| YFR010W                                          | UBP6          | YOR001W                 | RRP6          |
| YBR173C                                          | UMP1          | YOR066W                 | MSA1          |
| YDR484W                                          | VPS52         | YKR001C                 | VPS1          |
| YBR171W                                          | SEC66         | YEL060C                 | PRB1          |
| YGR072W                                          | UPF3          | YML001W                 | YPT7          |
| YDR363W-A                                        | SEM1          | YBL047C                 | EDE1          |
| YFR010W                                          | UBP6          | YJR035W                 | RAD26         |
| YJR024C                                          | MDE1          | YML057W                 | CMP2          |
| YGR261C                                          | APL6          | YNL041C                 | COG6          |
| YDR080W                                          | VPS41         | YNL238W                 | KEX2          |
| YKL041W                                          | VPS24         | YOL081W                 | IRA2          |



| Predictions at threshold level 0.75 continued... |               |                         |               |
|--------------------------------------------------|---------------|-------------------------|---------------|
| Gene1 of predicted pair                          |               | Gene2 of predicted pair |               |
| Systematic Name                                  | Standard Name | Systematic Name         | Standard Name |
| YDR507C                                          | GIN4          | YJR090C                 | GRR1          |
| YIL156W                                          | UBP7          | YMR273C                 | ZDS1          |
| YPL024W                                          | RMI1          | YER161C                 | SPT2          |
| YLR090W                                          | XDJ1          | YLR441C                 | RPS1A         |
| YBR108W                                          | YBR108W       | YDR137W                 | RGP1          |
| YPR046W                                          | MCM16         | YNL107W                 | YAF9          |
| YNL087W                                          | TCB2          | YDL083C                 | RPS16B        |
| YIL036W                                          | CST6          | YDR439W                 | LRS4          |
| YGL153W                                          | PEX14         | YHL002W                 | HSE1          |
| YGL078C                                          | DBP3          | YOR327C                 | SNC2          |
| YLR292C                                          | SEC72         | YHR178W                 | STB5          |
| YBR108W                                          | YBR108W       | YBR114W                 | RAD16         |
| YML062C                                          | MFT1          | YCR077C                 | PAT1          |
| YOR290C                                          | SNF2          | YDR310C                 | SUM1          |
| YPL249C-A                                        | RPL36B        | YDR388W                 | RVS167        |
| YOR127W                                          | RGA1          | YBL051C                 | PIN4          |
| YHR012W                                          | VPS29         | YDL155W                 | CLB3          |
| YLR371W                                          | ROM2          | YDR310C                 | SUM1          |
| YJL176C                                          | SWI3          | YDR073W                 | SNF11         |
| YMR127C                                          | SAS2          | YMR109W                 | MYO5          |
| YBR030W                                          | YBR030W       | YDL223C                 | HBT1          |
| YJR056C                                          | YJR056C       | YLR094C                 | GIS3          |
| YBR200W                                          | BEM1          | YDR456W                 | NHX1          |
| YMR026C                                          | PEX12         | YGL033W                 | HOP2          |
| YHR111W                                          | UBA4          | YCR077C                 | PAT1          |
| YNL058C                                          | YNL058C       | YDR310C                 | SUM1          |
| YPR051W                                          | MAK3          | YOR109W                 | INP53         |
| YPR017C                                          | DSS4          | YPL234C                 | TFP3          |
| YNR052C                                          | POP2          | YOL090W                 | MSH2          |

| Predictions at threshold level 0.75 continued... |               |                         |               |
|--------------------------------------------------|---------------|-------------------------|---------------|
| Gene1 of predicted pair                          |               | Gene2 of predicted pair |               |
| Systematic Name                                  | Standard Name | Systematic Name         | Standard Name |
| YHL031C                                          | GOS1          | YER139C                 | YER139C       |
| YIR005W                                          | IST3          | YFR030W                 | MET10         |
| YMR224C                                          | MRE11         | YPL253C                 | VIK1          |
| YGL087C                                          | MMS2          | YJL154C                 | VPS35         |
| YNL069C                                          | RPL16B        | YGL212W                 | VAM7          |
| YDR293C                                          | SSD1          | YOR208W                 | PTP2          |
| YMR152W                                          | YIM1          | YEL060C                 | PRB1          |
| YBL102W                                          | SFT2          | YOR109W                 | INP53         |
| YGR261C                                          | APL6          | YHL020C                 | OPI1          |
| YBL058W                                          | SHP1          | YNR072W                 | HXT17         |
| YBL047C                                          | EDE1          | YNL079C                 | TPM1          |
| YJL036W                                          | SNX4          | YHL020C                 | OPI1          |
| YOR358W                                          | HAP5          | YPL256C                 | CLN2          |
| YBR126C                                          | TPS1          | YDR477W                 | SNF1          |
| YKR048C                                          | NAP1          | YGR135W                 | PRE9          |
| YJR056C                                          | YJR056C       | YOL111C                 | MDY2          |
| YKL032C                                          | IXR1          | YEL056W                 | HAT2          |
| YNL297C                                          | MON2          | YDR310C                 | SUM1          |
| YMR224C                                          | MRE11         | YOR327C                 | SNC2          |
| YNL291C                                          | MID1          | YPL253C                 | VIK1          |
| YKL139W                                          | CTK1          | YKL213C                 | DOA1          |
| YCR034W                                          | FEN1          | YKL101W                 | HSL1          |
| YKL139W                                          | CTK1          | YNR072W                 | HXT17         |
| YBR274W                                          | CHK1          | YHR039C-A               | VMA10         |
| YDR028C                                          | REG1          | YDL229W                 | SSB1          |
| YEL053C                                          | MAK10         | YLR094C                 | GIS3          |
| YDR479C                                          | PEX29         | YMR204C                 | INP1          |
| YMR055C                                          | BUB2          | YLR350W                 | ORM2          |
| YPR084W                                          | YPR084W       | YOR308C                 | SNU66         |

| Predictions at threshold level 0.75 continued... |               |                         |               |
|--------------------------------------------------|---------------|-------------------------|---------------|
| Gene1 of predicted pair                          |               | Gene2 of predicted pair |               |
| Systematic Name                                  | Standard Name | Systematic Name         | Standard Name |
| YBR280C                                          | SAF1          | YMR230W                 | RPS10B        |
| YOR140W                                          | SFL1          | YPL256C                 | CLN2          |
| YGL185C                                          | YGL185C       | YPL240C                 | HSP82         |
| YLR192C                                          | HCR1          | YDL077C                 | VAM6          |
| YCR020C-A                                        | MAK31         | YHR060W                 | VMA22         |
| YFR010W                                          | UBP6          | YPL018W                 | CTF19         |
| YBR048W                                          | RPS11B        | YHR203C                 | RPS4B         |
| YKL139W                                          | CTK1          | YBR030W                 | YBR030W       |
| YHR013C                                          | ARD1          | YJL095W                 | BCK1          |
| YBR131W                                          | CCZ1          | YHR200W                 | RPN10         |
| YNL206C                                          | RTT106        | YGR135W                 | PRE9          |
| YER087C-B                                        | SBH1          | YBR175W                 | SWD3          |
| YDR146C                                          | SWI5          | YPL158C                 | YPL158C       |
| YGR020C                                          | VMA7          | YKL041W                 | VPS24         |
| YLR079W                                          | SIC1          | YOL054W                 | PSH1          |
| YGR241C                                          | YAP1802       | YBR127C                 | VMA2          |
| YNL069C                                          | RPL16B        | YMR054W                 | STV1          |
| YOR337W                                          | TEA1          | YBR036C                 | CSG2          |
| YBR171W                                          | SEC66         | YDR289C                 | RTT103        |
| YHR156C                                          | LIN1          | YPR030W                 | CSR2          |
| YDR410C                                          | STE14         | YOL081W                 | IRA2          |
| YGL212W                                          | VAM7          | YPR032W                 | SRO7          |
| YOR290C                                          | SNF2          | YHR060W                 | VMA22         |
| YOR332W                                          | VMA4          | YPR036W                 | VMA13         |
| YNL166C                                          | BNI5          | YKL048C                 | ELM1          |
| YBR107C                                          | IML3          | YLR182W                 | SWI6          |
| YDR335W                                          | MSN5          | YEL013W                 | VAC8          |
| YNL307C                                          | MCK1          | YHR111W                 | UBA4          |
| YLR288C                                          | MEC3          | YKL101W                 | HSL1          |

| Predictions at threshold level 0.75 continued... |               |                         |               |
|--------------------------------------------------|---------------|-------------------------|---------------|
| Gene1 of predicted pair                          |               | Gene2 of predicted pair |               |
| Systematic Name                                  | Standard Name | Systematic Name         | Standard Name |
| YDL184C                                          | RPL41A        | YLR093C                 | NYV1          |
| YPL161C                                          | BEM4          | YLR320W                 | MMS22         |
| YDR129C                                          | SAC6          | YPL045W                 | VPS16         |
| YNL025C                                          | SSN8          | YCR084C                 | TUP1          |
| YPR084W                                          | YPR084W       | YNL297C                 | MON2          |
| YBR057C                                          | MUM2          | YKL041W                 | VPS24         |
| YBR182C                                          | SMP1          | YKL161C                 | YKL161C       |
| YLR234W                                          | TOP3          | YDR318W                 | MCM21         |
| YLR386W                                          | VAC14         | YBR107C                 | IML3          |
| YLR441C                                          | RPS1A         | YHR081W                 | LRP1          |
| YCR020C-A                                        | MAK31         | YGL054C                 | ERV14         |
| YDR363W-A                                        | SEM1          | YIR005W                 | IST3          |
| YDL226C                                          | GCS1          | YPR119W                 | CLB2          |
| YMR276W                                          | DSK2          | YNR006W                 | VPS27         |
| YBR217W                                          | ATG12         | YBR019C                 | GAL10         |
| YCL001W                                          | RER1          | YPR032W                 | SRO7          |
| YEL053C                                          | MAK10         | YMR054W                 | STV1          |
| YBR030W                                          | YBR030W       | YEL060C                 | PRB1          |
| YDL042C                                          | SIR2          | YER110C                 | KAP123        |
| YGL054C                                          | ERV14         | YOL108C                 | INO4          |
| YKR048C                                          | NAP1          | YBL087C                 | RPL23A        |
| YKR035W-A                                        | DID2          | YDR486C                 | VPS60         |
| YER116C                                          | SLX8          | YGL175C                 | SAE2          |
| YBR260C                                          | RGD1          | YEL036C                 | ANP1          |
| YFR010W                                          | UBP6          | YBR036C                 | CSG2          |
| YLR234W                                          | TOP3          | YHR010W                 | RPL27A        |
| YLR216C                                          | CPR6          | YOL054W                 | PSH1          |
| YEL053C                                          | MAK10         | YJR084W                 | CSN12         |
| YEL065W                                          | SIT1          | YOL111C                 | MDY2          |

| Predictions at threshold level 0.75 continued... |               |                         |               |
|--------------------------------------------------|---------------|-------------------------|---------------|
| Gene1 of predicted pair                          |               | Gene2 of predicted pair |               |
| Systematic Name                                  | Standard Name | Systematic Name         | Standard Name |
| YDR320C                                          | SWA2          | YPL161C                 | BEM4          |
| YIL036W                                          | CST6          | YMR055C                 | BUB2          |
| YOR043W                                          | WHI2          | YLR370C                 | ARC18         |
| YHR156C                                          | LIN1          | YMR016C                 | SOK2          |
| YGR184C                                          | UBR1          | YMR055C                 | BUB2          |
| YJR035W                                          | RAD26         | YKL114C                 | APN1          |
| YBR127C                                          | VMA2          | YJL095W                 | BCK1          |
| YGL223C                                          | COG1          | YNL051W                 | COG5          |
| YBL078C                                          | ATG8          | YKR001C                 | VPS1          |
| YGL115W                                          | SNF4          | YLR180W                 | SAM1          |
| YLR192C                                          | HCR1          | YPL057C                 | SUR1          |
| YKR057W                                          | RPS21A        | YPL256C                 | CLN2          |
| YMR026C                                          | PEX12         | YOR066W                 | MSA1          |
| YLR292C                                          | SEC72         | YBR108W                 | YBR108W       |
| YPR040W                                          | TIP41         | YNR032W                 | PPG1          |
| YDL005C                                          | MED2          | YNL107W                 | YAF9          |
| YMR080C                                          | NAM7          | YPL057C                 | SUR1          |
| YDL122W                                          | UBP1          | YMR276W                 | DSK2          |
| YOR106W                                          | VAM3          | YEL042W                 | GDA1          |
| YCL037C                                          | SRO9          | YDR335W                 | MSN5          |
| YMR004W                                          | MVP1          | YML071C                 | COG8          |
| YER044C                                          | ERG28         | YDR261C                 | EXG2          |
| YHR111W                                          | UBA4          | YDR183W                 | PLP1          |
| YNL291C                                          | MID1          | YNL297C                 | MON2          |
| YDR142C                                          | PEX7          | YIL160C                 | POT1          |
| YGR159C                                          | NSR1          | YFR036W                 | CDC26         |
| YLR433C                                          | CNA1          | YDR184C                 | ATC1          |
| YMR142C                                          | RPL13B        | YLR180W                 | SAM1          |
| YDR137W                                          | RGP1          | YOL121C                 | RPS19A        |

| Predictions at threshold level 0.75 continued... |               |                         |               |
|--------------------------------------------------|---------------|-------------------------|---------------|
| Gene1 of predicted pair                          |               | Gene2 of predicted pair |               |
| Systematic Name                                  | Standard Name | Systematic Name         | Standard Name |
| YGR072W                                          | UPF3          | YJR140C                 | HIR3          |
| YGR020C                                          | VMA7          | YGR105W                 | VMA21         |
| YOR001W                                          | RRP6          | YPR046W                 | MCM16         |
| YHR079C                                          | IRE1          | YOL148C                 | SPT20         |
| YBR108W                                          | YBR108W       | YNL076W                 | MKS1          |
| YGR249W                                          | MGA1          | YJL095W                 | BCK1          |
| YOR127W                                          | RGA1          | YDR264C                 | AKR1          |
| YPR084W                                          | YPR084W       | YDR335W                 | MSN5          |
| YKR057W                                          | RPS21A        | YBL047C                 | EDE1          |
| YBL058W                                          | SHP1          | YHR156C                 | LIN1          |
| YDR293C                                          | SSD1          | YJL127C                 | SPT10         |
| YNL201C                                          | PSY2          | YIL036W                 | CST6          |
| YLR079W                                          | SIC1          | YIR005W                 | IST3          |
| YGR104C                                          | SRB5          | YLR410W                 | VIP1          |
| YLL039C                                          | UBI4          | YEL044W                 | IES6          |
| YOR076C                                          | SKI7          | YBR228W                 | SLX1          |
| YDR260C                                          | SWM1          | YHR013C                 | ARD1          |
| YDR293C                                          | SSD1          | YHL020C                 | OPI1          |
| YNL218W                                          | MGS1          | YGR072W                 | UPF3          |
| YKR099W                                          | BAS1          | YHR060W                 | VMA22         |
| YNL058C                                          | YNL058C       | YDR207C                 | UME6          |
| YGL033W                                          | HOP2          | YER044C                 | ERG28         |
| YLR441C                                          | RPS1A         | YLR093C                 | NYV1          |
| YBL102W                                          | SFT2          | YKR001C                 | VPS1          |
| YEL053C                                          | MAK10         | YJR033C                 | RAV1          |
| YGR249W                                          | MGA1          | YJL183W                 | MNN11         |
| YGR104C                                          | SRB5          | YOR106W                 | VAM3          |
| YOR327C                                          | SNC2          | YNL107W                 | YAF9          |
| YGL174W                                          | BUD13         | YGR188C                 | BUB1          |

| Predictions at threshold level 0.75 continued... |               |                         |               |
|--------------------------------------------------|---------------|-------------------------|---------------|
| Gene1 of predicted pair                          |               | Gene2 of predicted pair |               |
| Systematic Name                                  | Standard Name | Systematic Name         | Standard Name |
| YLR119W                                          | SRN2          | YLR180W                 | SAM1          |
| YDR507C                                          | GIN4          | YLL054C                 | YLL054C       |
| YIL159W                                          | BNR1          | YOL081W                 | IRA2          |
| YNL238W                                          | KEX2          | YDL077C                 | VAM6          |
| YJR056C                                          | YJR056C       | YER040W                 | GLN3          |
| YDL223C                                          | HBT1          | YER044C                 | ERG28         |
| YJR059W                                          | PTK2          | YPL256C                 | CLN2          |
| YDR484W                                          | VPS52         | YBL025W                 | RRN10         |
| YDR137W                                          | RGP1          | YNL058C                 | YNL058C       |
| YKL139W                                          | CTK1          | YGR135W                 | PRE9          |
| YMR153W                                          | NUP53         | YNL041C                 | COG6          |
| YPL106C                                          | SSE1          | YNL107W                 | YAF9          |
| YDR310C                                          | SUM1          | YOL108C                 | INO4          |
| YPR030W                                          | CSR2          | YDL077C                 | VAM6          |
| YCR034W                                          | FEN1          | YDR310C                 | SUM1          |
| YMR125W                                          | STO1          | YKR024C                 | DBP7          |
| YDL080C                                          | THI3          | YHR178W                 | STB5          |
| YNL288W                                          | CAF40         | YDR144C                 | MKC7          |
| YEL065W                                          | SIT1          | YNL238W                 | KEX2          |
| YGL153W                                          | PEX14         | YOL081W                 | IRA2          |
| YMR224C                                          | MRE11         | YLR371W                 | ROM2          |
| YEL009C                                          | GCN4          | YDR073W                 | SNF11         |
| YDL184C                                          | RPL41A        | YJR056C                 | YJR056C       |
| YJL154C                                          | VPS35         | YOR109W                 | INP53         |
| YGL178W                                          | MPT5          | YKL079W                 | SMY1          |
| YAL024C                                          | LTE1          | YBR280C                 | SAF1          |
| YLR079W                                          | SIC1          | YPL256C                 | CLN2          |
| YDL101C                                          | DUN1          | YJL187C                 | SWE1          |
| YOR069W                                          | VPS5          | YOR327C                 | SNC2          |

| Predictions at threshold level 0.75 continued... |               |                         |               |
|--------------------------------------------------|---------------|-------------------------|---------------|
| Gene1 of predicted pair                          |               | Gene2 of predicted pair |               |
| Systematic Name                                  | Standard Name | Systematic Name         | Standard Name |
| YPR135W                                          | CTF4          | YHR056C                 | RSC30         |
| YIL036W                                          | CST6          | YIL103W                 | DPH1          |
| YPL024W                                          | RMI1          | YDR484W                 | VPS52         |
| YEL009C                                          | GCN4          | YDR216W                 | ADR1          |
| YHR134W                                          | WSS1          | YNL166C                 | BNI5          |
| YBR111W-A                                        | SUS1          | YGL252C                 | RTG2          |
| YDR358W                                          | GGA1          | YBR019C                 | GAL10         |
| YML016C                                          | PPZ1          | YJR063W                 | RPA12         |
| YPL253C                                          | VIK1          | YOR008C                 | SLG1          |
| YDL020C                                          | RPN4          | YPR131C                 | NAT3          |
| YDL013W                                          | SLX5          | YLR032W                 | RAD5          |
| YDR004W                                          | RAD57         | YOR043W                 | WHI2          |
| YJL149W                                          | YJL149W       | YJL204C                 | RCY1          |
| YLR292C                                          | SEC72         | YGR270W                 | YTA7          |
| YDR144C                                          | MKC7          | YJL190C                 | RPS22A        |
| YCR065W                                          | HCM1          | YNL147W                 | LSM7          |
| YJR090C                                          | GRR1          | YAR014C                 | BUD14         |
| YEL022W                                          | GEA2          | YPL051W                 | ARL3          |
| YEL065W                                          | SIT1          | YBL025W                 | RRN10         |
| YER044C                                          | ERG28         | YHR081W                 | LRP1          |
| YDR477W                                          | SNF1          | YML001W                 | YPT7          |
| YGL094C                                          | PAN2          | YDR485C                 | VPS72         |
| YOL112W                                          | MSB4          | YOR327C                 | SNC2          |
| YDR440W                                          | DOT1          | YBL072C                 | RPS8A         |
| YJR135C                                          | MCM22         | YDL047W                 | SIT4          |
| YCR086W                                          | CSM1          | YGL151W                 | NUT1          |
| YDR108W                                          | GSG1          | YCL037C                 | SRO9          |
| YHR081W                                          | LRP1          | YER139C                 | YER139C       |
| YLR441C                                          | RPS1A         | YLR094C                 | GIS3          |



| Predictions at threshold level 0.75 continued... |               |                         |               |
|--------------------------------------------------|---------------|-------------------------|---------------|
| Gene1 of predicted pair                          |               | Gene2 of predicted pair |               |
| Systematic Name                                  | Standard Name | Systematic Name         | Standard Name |
| YLR447C                                          | VMA6          | YJR033C                 | RAV1          |
| YDR378C                                          | LSM6          | YNL147W                 | LSM7          |
| YLR095C                                          | IOC2          | YER040W                 | GLN3          |
| YDR477W                                          | SNF1          | YLR320W                 | MMS22         |
| YMR109W                                          | MYO5          | YEL056W                 | HAT2          |
| YML073C                                          | RPL6A         | YPR119W                 | CLB2          |
| YNL253W                                          | TEX1          | YML062C                 | MFT1          |
| YPR084W                                          | YPR084W       | YER162C                 | RAD4          |
| YCR020C-A                                        | MAK31         | YPL195W                 | APL5          |
| YOL018C                                          | TLG2          | YDR310C                 | SUM1          |
| YLR079W                                          | SIC1          | YKL114C                 | APN1          |
| YMR152W                                          | YIM1          | YCR053W                 | THR4          |
| YJL004C                                          | SYS1          | YML071C                 | COG8          |
| YML115C                                          | VAN1          | YGL153W                 | PEX14         |
| YLR192C                                          | HCR1          | YOR066W                 | MSA1          |
| YLR083C                                          | EMP70         | YPL120W                 | VPS30         |
| YNL025C                                          | SSN8          | YOR080W                 | DIA2          |
| YEL036C                                          | ANP1          | YKL041W                 | VPS24         |
| YKL139W                                          | CTK1          | YBR020W                 | GAL1          |
| YOR076C                                          | SKI7          | YHL002W                 | HSE1          |
| YDR076W                                          | RAD55         | YPL018W                 | CTF19         |
| YBR108W                                          | YBR108W       | YER110C                 | KAP123        |
| YDR174W                                          | HMO1          | YFR030W                 | MET10         |
| YIR009W                                          | MSL1          | YDL001W                 | RMD1          |
| YPR052C                                          | NHP6A         | YOL051W                 | GAL11         |
| YDR378C                                          | LSM6          | YMR055C                 | BUB2          |
| YOR112W                                          | CEX1          | YER120W                 | SCS2          |
| YPL195W                                          | APL5          | YER040W                 | GLN3          |
| YNL166C                                          | BNI5          | YGR270W                 | YTA7          |

| Predictions at threshold level 0.75 continued... |               |                         |               |
|--------------------------------------------------|---------------|-------------------------|---------------|
| Gene1 of predicted pair                          |               | Gene2 of predicted pair |               |
| Systematic Name                                  | Standard Name | Systematic Name         | Standard Name |
| YER001W                                          | MNN1          | YGL038C                 | OCH1          |
| YJL053W                                          | PEP8          | YJL036W                 | SNX4          |
| YJL154C                                          | VPS35         | YOR112W                 | CEX1          |
| YNL325C                                          | FIG4          | YBR200W                 | BEM1          |
| YDR156W                                          | RPA14         | YJL124C                 | LSM1          |
| YJL053W                                          | PEP8          | YDR484W                 | VPS52         |
| YPL105C                                          | YPL105C       | YNL238W                 | KEX2          |
| YJR040W                                          | GEF1          | YEL043W                 | YEL043W       |
| YNR052C                                          | POP2          | YBR082C                 | UBC4          |
| YDL101C                                          | DUN1          | YJL124C                 | LSM1          |
| YDR440W                                          | DOT1          | YOR308C                 | SNU66         |
| YEL053C                                          | MAK10         | YHR114W                 | BZZ1          |
| YKL094W                                          | YJU3          | YMR152W                 | YIM1          |
| YJL124C                                          | LSM1          | YDL013W                 | SLX5          |
| YJL124C                                          | LSM1          | YAL002W                 | VPS8          |
| YOR290C                                          | SNF2          | YOR043W                 | WHI2          |
| YLR399C                                          | BDF1          | YDR378C                 | LSM6          |
| YNL307C                                          | MCK1          | YNL107W                 | YAF9          |
| YGL253W                                          | HXK2          | YHR114W                 | BZZ1          |
| YHR200W                                          | RPN10         | YLR180W                 | SAM1          |
| YNR032C-A                                        | HUB1          | YDL223C                 | HBT1          |
| YHR200W                                          | RPN10         | YDL155W                 | CLB3          |
| YOR195W                                          | SLK19         | YOR014W                 | RTS1          |
| YDR146C                                          | SWI5          | YHR158C                 | KEL1          |
| YML103C                                          | NUP188        | YOL054W                 | PSH1          |
| YJL127C                                          | SPT10         | YDR363W-A               | SEM1          |
| YLR386W                                          | VAC14         | YIL036W                 | CST6          |
| YOR337W                                          | TEA1          | YCR053W                 | THR4          |
| YGL200C                                          | EMP24         | YLR093C                 | NYV1          |

| Predictions at threshold level 0.75 continued... |               |                         |               |
|--------------------------------------------------|---------------|-------------------------|---------------|
| Gene1 of predicted pair                          |               | Gene2 of predicted pair |               |
| Systematic Name                                  | Standard Name | Systematic Name         | Standard Name |
| YBR107C                                          | IML3          | YJL006C                 | CTK2          |
| YGL223C                                          | COG1          | YNL293W                 | MSB3          |
| YNR052C                                          | POP2          | YPL018W                 | CTF19         |
| YGL025C                                          | PGD1          | YCR084C                 | TUP1          |
| YIL159W                                          | BNR1          | YLR119W                 | SRN2          |
| YCR038C                                          | BUD5          | YPL240C                 | HSP82         |
| YCR065W                                          | HCM1          | YJL058C                 | BIT61         |
| YNL201C                                          | PSY2          | YKL048C                 | ELM1          |
| YOR327C                                          | SNC2          | YDL077C                 | VAM6          |
| YLR337C                                          | VRP1          | YER110C                 | KAP123        |
| YKL007W                                          | CAP1          | YIL133C                 | RPL16A        |
| YMR142C                                          | RPL13B        | YBR036C                 | CSG2          |
| YGL178W                                          | MPT5          | YDR335W                 | MSN5          |
| YLR079W                                          | SIC1          | YOR014W                 | RTS1          |
| YNL291C                                          | MID1          | YMR054W                 | STV1          |
| YJR031C                                          | GEA1          | YKR030W                 | GMH1          |
| YML038C                                          | YMD8          | YNL041C                 | COG6          |
| YOR106W                                          | VAM3          | YEL013W                 | VAC8          |
| YGR249W                                          | MGA1          | YOL081W                 | IRA2          |
| YHR156C                                          | LIN1          | YKL126W                 | YPK1          |
| YLR371W                                          | ROM2          | YNL076W                 | MKS1          |
| YPL045W                                          | VPS16         | YOR036W                 | PEP12         |
| YGL223C                                          | COG1          | YHL020C                 | OPI1          |
| YNL139C                                          | RLR1          | YNL253W                 | TEX1          |
| YDR477W                                          | SNF1          | YDL192W                 | ARF1          |
| YJR043C                                          | POL32         | YHR056C                 | RSC30         |
| YHR111W                                          | UBA4          | YHR013C                 | ARD1          |
| YGR020C                                          | VMA7          | YOL108C                 | INO4          |
| YCL067C                                          | HMLALPHA2     | YCL066W                 | HMLALPHA1     |

| Predictions at threshold level 0.75 continued... |               |                         |               |
|--------------------------------------------------|---------------|-------------------------|---------------|
| Gene1 of predicted pair                          |               | Gene2 of predicted pair |               |
| Systematic Name                                  | Standard Name | Systematic Name         | Standard Name |
| YLR079W                                          | SIC1          | YLR058C                 | SHM2          |
| YMR095C                                          | SNO1          | YDL077C                 | VAM6          |
| YMR198W                                          | CIK1          | YBR181C                 | RPS6B         |
| YFR036W                                          | CDC26         | YMR152W                 | YIM1          |
| YLR386W                                          | VAC14         | YNL032W                 | SIW14         |
| YNL248C                                          | RPA49         | YMR055C                 | BUB2          |
| YDR363W-A                                        | SEM1          | YOR014W                 | RTS1          |
| YHR200W                                          | RPN10         | YGL031C                 | RPL24A        |
| YLR315W                                          | NKP2          | YOR014W                 | RTS1          |
| YOL111C                                          | MDY2          | YLR094C                 | GIS3          |
| YMR080C                                          | NAM7          | YFR010W                 | UBP6          |
| YKL025C                                          | PAN3          | YDL155W                 | CLB3          |
| YOR231W                                          | MKK1          | YER089C                 | PTC2          |
| YOR076C                                          | SKI7          | YGL213C                 | SKI8          |
| YDL077C                                          | VAM6          | YDR207C                 | UME6          |
| YNL139C                                          | RLR1          | YER118C                 | SHO1          |
| YDR363W-A                                        | SEM1          | YDR254W                 | CHL4          |
| YDR261C                                          | EXG2          | YHR081W                 | LRP1          |
| YLR386W                                          | VAC14         | YBR108W                 | YBR108W       |
| YLR216C                                          | CPR6          | YGR135W                 | PRE9          |
| YGL237C                                          | HAP2          | YOR358W                 | HAP5          |
| YGR249W                                          | MGA1          | YNL058C                 | YNL058C       |
| YGR249W                                          | MGA1          | YGL124C                 | MON1          |
| YBR200W                                          | BEM1          | YER049W                 | TPA1          |
| YOR033C                                          | EXO1          | YMR284W                 | YKU70         |
| YJL029C                                          | VPS53         | YKR001C                 | VPS1          |
| YJL154C                                          | VPS35         | YGR019W                 | UGA1          |
| YMR199W                                          | CLN1          | YHR108W                 | GGA2          |
| YCR024C-A                                        | PMP1          | YOR358W                 | HAP5          |

| Predictions at threshold level 0.75 continued... |               |                         |               |
|--------------------------------------------------|---------------|-------------------------|---------------|
| Gene1 of predicted pair                          |               | Gene2 of predicted pair |               |
| Systematic Name                                  | Standard Name | Systematic Name         | Standard Name |
| YDL020C                                          | RPN4          | YGR184C                 | UBR1          |
| YPR131C                                          | NAT3          | YER116C                 | SLX8          |
| YER144C                                          | UBP5          | YJR032W                 | CPR7          |
| YLR083C                                          | EMP70         | YMR054W                 | STV1          |
| YFL023W                                          | BUD27         | YGL212W                 | VAM7          |
| YIL034C                                          | CAP2          | YML016C                 | PPZ1          |
| YLR429W                                          | CRN1          | YGL003C                 | CDH1          |
| YDR080W                                          | VPS41         | YPL045W                 | VPS16         |
| YMR127C                                          | SAS2          | YIL008W                 | URM1          |
| YNL288W                                          | CAF40         | YGR054W                 | YGR054W       |
| YPL152W                                          | RRD2          | YLR254C                 | NDL1          |
| YJR140C                                          | HIR3          | YKL213C                 | DOA1          |
| YEL053C                                          | MAK10         | YJR090C                 | GRR1          |
| YPR120C                                          | CLB5          | YHR108W                 | GGA2          |
| YBR217W                                          | ATG12         | YLR093C                 | NYV1          |
| YNL076W                                          | MKS1          | YER040W                 | GLN3          |
| YDR318W                                          | MCM21         | YAR014C                 | BUD14         |
| YGL003C                                          | CDH1          | YOR141C                 | ARP8          |
| YOR043W                                          | WHI2          | YDR289C                 | RTT103        |
| YMR224C                                          | MRE11         | YER144C                 | UBP5          |
| YGR268C                                          | HUA1          | YJL004C                 | SYS1          |
| YBL058W                                          | SHP1          | YGL033W                 | HOP2          |
| YNL215W                                          | IES2          | YOL081W                 | IRA2          |
| YKL101W                                          | HSL1          | YGL019W                 | CKB1          |
| YLR441C                                          | RPS1A         | YBR280C                 | SAF1          |
| YLR090W                                          | XDJ1          | YNL087W                 | TCB2          |
| YBR030W                                          | YBR030W       | YJR056C                 | YJR056C       |
| YGR104C                                          | SRB5          | YOR014W                 | RTS1          |
| YBR108W                                          | YBR108W       | YER144C                 | UBP5          |

| Predictions at threshold level 0.75 continued... |               |                         |               |
|--------------------------------------------------|---------------|-------------------------|---------------|
| Gene1 of predicted pair                          |               | Gene2 of predicted pair |               |
| Systematic Name                                  | Standard Name | Systematic Name         | Standard Name |
| YMR246W                                          | FAA4          | YKL140W                 | TGL1          |
| YHR060W                                          | VMA22         | YML071C                 | COG8          |
| YOR069W                                          | VPS5          | YMR004W                 | MVP1          |
| YBL025W                                          | RRN10         | YGL124C                 | MON1          |
| YPR051W                                          | MAK3          | YLR309C                 | IMH1          |
| YER143W                                          | DDI1          | YJL164C                 | TPK1          |
| YNL307C                                          | MCK1          | YKL110C                 | KTI12         |
| YML115C                                          | VAN1          | YOR043W                 | WHI2          |
| YLR093C                                          | NYV1          | YOR036W                 | PEP12         |
| YDR335W                                          | MSN5          | YNL199C                 | GCR2          |
| YGL212W                                          | VAM7          | YJL183W                 | MNN11         |
| YBL008W                                          | HIR1          | YOR141C                 | ARP8          |
| YNL329C                                          | PEX6          | YHR013C                 | ARD1          |
| YOR106W                                          | VAM3          | YPL161C                 | BEM4          |
| YJL036W                                          | SNX4          | YCR066W                 | RAD18         |
| YLR396C                                          | VPS33         | YML001W                 | YPT7          |
| YKL116C                                          | PRR1          | YNL325C                 | FIG4          |
| YHR114W                                          | BZZ1          | YBR114W                 | RAD16         |
| YDR225W                                          | HTA1          | YOR038C                 | HIR2          |
| YBR228W                                          | SLX1          | YOL030W                 | GAS5          |
| YBL047C                                          | EDE1          | YML071C                 | COG8          |
| YMR116C                                          | ASC1          | YJL124C                 | LSM1          |
| YEL053C                                          | MAK10         | YKR030W                 | GMH1          |
| YOR195W                                          | SLK19         | YFR030W                 | MET10         |
| YKL048C                                          | ELM1          | YJL095W                 | BCK1          |
| YJR060W                                          | CBF1          | YPL152W                 | RRD2          |
| YDL006W                                          | PTC1          | YJL095W                 | BCK1          |
| YML016C                                          | PPZ1          | YLR315W                 | NKP2          |
| YLR216C                                          | CPR6          | YDR363W-A               | SEM1          |

| Predictions at threshold level 0.75 continued... |               |                         |               |
|--------------------------------------------------|---------------|-------------------------|---------------|
| Gene1 of predicted pair                          |               | Gene2 of predicted pair |               |
| Systematic Name                                  | Standard Name | Systematic Name         | Standard Name |
| YPL024W                                          | RMI1          | YLR371W                 | ROM2          |
| YBR171W                                          | SEC66         | YGL200C                 | EMP24         |
| YDR335W                                          | MSN5          | YHR111W                 | UBA4          |
| YER116C                                          | SLX8          | YML001W                 | YPT7          |
| YGL033W                                          | HOP2          | YCR053W                 | THR4          |
| YPL024W                                          | RMI1          | YIR002C                 | MPH1          |
| YDR261C                                          | EXG2          | YJL183W                 | MNN11         |
| YCL001W                                          | RER1          | YNL041C                 | COG6          |
| YDR484W                                          | VPS52         | YMR230W                 | RPS10B        |
| YLR292C                                          | SEC72         | YBR171W                 | SEC66         |
| YNL044W                                          | YIP3          | YJL204C                 | RCY1          |
| YDL020C                                          | RPN4          | YGL151W                 | NUT1          |
| YLR360W                                          | VPS38         | YKR020W                 | VPS51         |
| YLR441C                                          | RPS1A         | YMR230W                 | RPS10B        |
| YBR041W                                          | FAT1          | YMR038C                 | CCS1          |
| YBL103C                                          | RTG3          | YOR290C                 | SNF2          |
| YNL206C                                          | RTT106        | YPL161C                 | BEM4          |
| YOR290C                                          | SNF2          | YBR171W                 | SEC66         |
| YNL058C                                          | YNL058C       | YJL095W                 | BCK1          |
| YJL183W                                          | MNN11         | YJR084W                 | CSN12         |
| YNL288W                                          | CAF40         | YIL038C                 | NOT3          |
| YFL023W                                          | BUD27         | YPL037C                 | EGD1          |
| YOR083W                                          | WHI5          | YBR215W                 | HPC2          |
| YHR134W                                          | WSS1          | YJR090C                 | GRR1          |
| YMR198W                                          | CIK1          | YNR052C                 | POP2          |
| YOR069W                                          | VPS5          | YBR131W                 | CCZ1          |
| YAL024C                                          | LTE1          | YBR030W                 | YBR030W       |
| YEL053C                                          | MAK10         | YBR114W                 | RAD16         |
| YFR010W                                          | UBP6          | YOL090W                 | MSH2          |

| Predictions at threshold level 0.75 continued... |               |                         |               |
|--------------------------------------------------|---------------|-------------------------|---------------|
| Gene1 of predicted pair                          |               | Gene2 of predicted pair |               |
| Systematic Name                                  | Standard Name | Systematic Name         | Standard Name |
| YHR060W                                          | VMA22         | YMR230W                 | RPS10B        |
| YER144C                                          | UBP5          | YMR230W                 | RPS10B        |
| YKR035W-A                                        | DID2          | YOR043W                 | WHI2          |
| YIL008W                                          | URM1          | YJR090C                 | GRR1          |
| YBR126C                                          | TPS1          | YJR056C                 | YJR056C       |
| YAL010C                                          | MDM10         | YGL163C                 | RAD54         |
| YKL007W                                          | CAP1          | YPL256C                 | CLN2          |
| YHR134W                                          | WSS1          | YAR014C                 | BUD14         |
| YPL253C                                          | VIK1          | YEL056W                 | HAT2          |
| YML016C                                          | PPZ1          | YBR114W                 | RAD16         |
| YDR289C                                          | RTT103        | YGL253W                 | HXK2          |
| YOR275C                                          | RIM20         | YDR310C                 | SUM1          |
| YPL256C                                          | CLN2          | YGL003C                 | CDH1          |
| YEL053C                                          | MAK10         | YNL051W                 | COG5          |
| YNL291C                                          | MID1          | YLR381W                 | CTF3          |
| YDR383C                                          | NKP1          | YDR289C                 | RTT103        |
| YNL291C                                          | MID1          | YNL238W                 | KEX2          |
| YKR001C                                          | VPS1          | YLR396C                 | VPS33         |
| YGL078C                                          | DBP3          | YGL115W                 | SNF4          |
| YMR116C                                          | ASC1          | YNR052C                 | POP2          |
| YMR080C                                          | NAM7          | YBR017C                 | KAP104        |
| YBR171W                                          | SEC66         | YJR090C                 | GRR1          |
| YPL240C                                          | HSP82         | YJR159W                 | SOR1          |
| YIL159W                                          | BNR1          | YMR153W                 | NUP53         |
| YIL008W                                          | URM1          | YKL101W                 | HSL1          |
| YDR477W                                          | SNF1          | YHR060W                 | VMA22         |
| YGR072W                                          | UPF3          | YGR261C                 | APL6          |
| YIL036W                                          | CST6          | YJR135C                 | MCM22         |
| YPR131C                                          | NAT3          | YDR200C                 | VPS64         |



| Predictions at threshold level 0.75 continued... |               |                         |               |
|--------------------------------------------------|---------------|-------------------------|---------------|
| Gene1 of predicted pair                          |               | Gene2 of predicted pair |               |
| Systematic Name                                  | Standard Name | Systematic Name         | Standard Name |
| YKL139W                                          | CTK1          | YPR046W                 | MCM16         |
| YKR099W                                          | BAS1          | YMR230W                 | RPS10B        |
| YKR061W                                          | KTR2          | YOL081W                 | IRA2          |
| YPR173C                                          | VPS4          | YDL226C                 | GCS1          |
| YDL223C                                          | HBT1          | YHR060W                 | VMA22         |
| YPL022W                                          | RAD1          | YJR135C                 | MCM22         |
| YPL195W                                          | APL5          | YEL060C                 | PRB1          |
| YGL237C                                          | HAP2          | YDR318W                 | MCM21         |
| YDR254W                                          | CHL4          | YDR289C                 | RTT103        |
| YGR020C                                          | VMA7          | YNR032W                 | PPG1          |
| YLR061W                                          | RPL22A        | YJL095W                 | BCK1          |
| YIL076W                                          | SEC28         | YDL223C                 | HBT1          |
| YPL234C                                          | TFP3          | YLR370C                 | ARC18         |
| YGL087C                                          | MMS2          | YHR134W                 | WSS1          |
| YER116C                                          | SLX8          | YNL041C                 | COG6          |
| YML095C                                          | RAD10         | YJL095W                 | BCK1          |
| YLL042C                                          | ATG10         | YNR007C                 | ATG3          |
| YJL136C                                          | RPS21B        | YPL161C                 | BEM4          |
| YIL008W                                          | URM1          | YDR264C                 | AKR1          |
| YER110C                                          | KAP123        | YCR086W                 | CSM1          |
| YDL020C                                          | RPN4          | YDL190C                 | UFD2          |
| YPR131C                                          | NAT3          | YNL107W                 | YAF9          |
| YPL022W                                          | RAD1          | YMR201C                 | RAD14         |
| YGR104C                                          | SRB5          | YDR192C                 | NUP42         |
| YPL147W                                          | PXA1          | YKL188C                 | PXA2          |
| YKR001C                                          | VPS1          | YML038C                 | YMD8          |
| YLR018C                                          | POM34         | YKR024C                 | DBP7          |
| YML001W                                          | YPT7          | YDL192W                 | ARF1          |
| YHR039C-A                                        | VMA10         | YJL183W                 | MNN11         |

| Predictions at threshold level 0.75 continued... |               |                         |               |
|--------------------------------------------------|---------------|-------------------------|---------------|
| Gene1 of predicted pair                          |               | Gene2 of predicted pair |               |
| Systematic Name                                  | Standard Name | Systematic Name         | Standard Name |
| YOR275C                                          | RIM20         | YMR022W                 | UBC7          |
| YML103C                                          | NUP188        | YDR207C                 | UME6          |
| YPL105C                                          | YPL105C       | YAR014C                 | BUD14         |
| YGL174W                                          | BUD13         | YNL199C                 | GCR2          |
| YPL161C                                          | BEM4          | YNL051W                 | COG5          |
| YML095C                                          | RAD10         | YOR358W                 | HAP5          |
| YBR194W                                          | SOY1          | YOR308C                 | SNU66         |
| YBR107C                                          | IML3          | YNL236W                 | SIN4          |
| YBL058W                                          | SHP1          | YPL161C                 | BEM4          |
| YLR090W                                          | XDJ1          | YGL147C                 | RPL9A         |
| YNR052C                                          | POP2          | YLR313C                 | SPH1          |
| YIL159W                                          | BNR1          | YKL129C                 | MYO3          |
| YER139C                                          | YER139C       | YER040W                 | GLN3          |
| YOR132W                                          | VPS17         | YOL067C                 | RTG1          |
| YPL037C                                          | EGD1          | YHR060W                 | VMA22         |
| YOR358W                                          | HAP5          | YDR310C                 | SUM1          |
| YNL288W                                          | CAF40         | YER110C                 | KAP123        |
| YCL037C                                          | SRO9          | YPL234C                 | TFP3          |
| YOR129C                                          | YOR129C       | YNL225C                 | CNM67         |
| YOR066W                                          | MSA1          | YGL124C                 | MON1          |
| YNL307C                                          | MCK1          | YDR254W                 | CHL4          |
| YNL206C                                          | RTT106        | YMR038C                 | CCS1          |
| YLR288C                                          | MEC3          | YJR090C                 | GRR1          |
| YFL023W                                          | BUD27         | YNR072W                 | HXT17         |
| YOL052C-A                                        | DDR2          | YPL240C                 | HSP82         |
| YBL103C                                          | RTG3          | YER122C                 | GLO3          |
| YGL212W                                          | VAM7          | YOR109W                 | INP53         |
| YDR174W                                          | HMO1          | YNL307C                 | MCK1          |
| YGR072W                                          | UPF3          | YJR033C                 | RAV1          |

| Predictions at threshold level 0.75 continued... |               |                         |               |
|--------------------------------------------------|---------------|-------------------------|---------------|
| Gene1 of predicted pair                          |               | Gene2 of predicted pair |               |
| Systematic Name                                  | Standard Name | Systematic Name         | Standard Name |
| YKL110C                                          | KTI12         | YHR187W                 | IKI1          |
| YPL161C                                          | BEM4          | YDL047W                 | SIT4          |
| YGR152C                                          | RSR1          | YNR049C                 | MSO1          |
| YBR194W                                          | SOY1          | YPL106C                 | SSE1          |
| YCR066W                                          | RAD18         | YNL041C                 | COG6          |
| YOR085W                                          | OST3          | YEL036C                 | ANP1          |
| YER116C                                          | SLX8          | YGL031C                 | RPL24A        |
| YGR270W                                          | YTA7          | YKL213C                 | DOA1          |
| YBR108W                                          | YBR108W       | YER044C                 | ERG28         |
| YDL223C                                          | HBT1          | YKR035W-A               | DID2          |
| YJL154C                                          | VPS35         | YOL067C                 | RTG1          |
| YGR081C                                          | SLX9          | YLR352W                 | YLR352W       |
| YKL116C                                          | PRR1          | YLR441C                 | RPS1A         |
| YGL087C                                          | MMS2          | YPR051W                 | MAK3          |
| YGL223C                                          | COG1          | YPR032W                 | SRO7          |
| YLR381W                                          | CTF3          | YJL058C                 | BIT61         |
| YLR371W                                          | ROM2          | YBL101C                 | ECM21         |
| YDR439W                                          | LRS4          | YDR183W                 | PLP1          |
| YMR198W                                          | CIK1          | YOR195W                 | SLK19         |
| YPL024W                                          | RMI1          | YJL176C                 | SWI3          |
| YNL025C                                          | SSN8          | YJR140C                 | HIR3          |
| YLR360W                                          | VPS38         | YNL199C                 | GCR2          |
| YLR095C                                          | IOC2          | YMR224C                 | MRE11         |
| YPR036W                                          | VMA13         | YHR039C-A               | VMA10         |
| YKR061W                                          | KTR2          | YJL124C                 | LSM1          |
| YLR441C                                          | RPS1A         | YDR358W                 | GGA1          |
| YBR194W                                          | SOY1          | YKL041W                 | VPS24         |
| YOR195W                                          | SLK19         | YJL058C                 | BIT61         |
| YOR008C                                          | SLG1          | YJL129C                 | TRK1          |

| Predictions at threshold level 0.75 continued... |               |                         |               |
|--------------------------------------------------|---------------|-------------------------|---------------|
| Gene1 of predicted pair                          |               | Gene2 of predicted pair |               |
| Systematic Name                                  | Standard Name | Systematic Name         | Standard Name |
| YBR290W                                          | BSD2          | YGL016W                 | KAP122        |
| YDL116W                                          | NUP84         | YNL116W                 | DMA2          |
| YPL042C                                          | SSN3          | YPR120C                 | CLB5          |
| YBR215W                                          | HPC2          | YIR005W                 | IST3          |
| YGL087C                                          | MMS2          | YPR120C                 | CLB5          |
| YDR477W                                          | SNF1          | YER044C                 | ERG28         |
| YNL307C                                          | MCK1          | YBL047C                 | EDE1          |
| YHR156C                                          | LIN1          | YML001W                 | YPT7          |
| YBR030W                                          | YBR030W       | YJL095W                 | BCK1          |
| YBR036C                                          | CSG2          | YLR180W                 | SAM1          |
| YBR171W                                          | SEC66         | YDR318W                 | MCM21         |
| YDL227C                                          | HO            | YER143W                 | DDI1          |
| YIL159W                                          | BNR1          | YDR507C                 | GIN4          |
| YNL297C                                          | MON2          | YML071C                 | COG8          |
| YMR055C                                          | BUB2          | YJL006C                 | CTK2          |
| YGL212W                                          | VAM7          | YKR099W                 | BAS1          |
| YDL223C                                          | HBT1          | YDL083C                 | RPS16B        |
| YLR181C                                          | VTA1          | YOR275C                 | RIM20         |
| YHR013C                                          | ARD1          | YGR188C                 | BUB1          |
| YLR109W                                          | AHP1          | YGR209C                 | TRX2          |
| YJL187C                                          | SWE1          | YMR038C                 | CCS1          |
| YHL025W                                          | SNF6          | YDR073W                 | SNF11         |
| YLR095C                                          | IOC2          | YLR192C                 | HCR1          |
| YPL024W                                          | RMI1          | YGL033W                 | HOP2          |
| YOR069W                                          | VPS5          | YOL108C                 | INO4          |
| YKL135C                                          | APL2          | YOR327C                 | SNC2          |
| YDR289C                                          | RTT103        | YHR167W                 | THP2          |
| YER001W                                          | MNN1          | YGR135W                 | PRE9          |
| YLR381W                                          | CTF3          | YNL225C                 | CNM67         |

| Predictions at threshold level 0.75 continued... |               |                         |               |
|--------------------------------------------------|---------------|-------------------------|---------------|
| Gene1 of predicted pair                          |               | Gene2 of predicted pair |               |
| Systematic Name                                  | Standard Name | Systematic Name         | Standard Name |
| YDR083W                                          | RRP8          | YOR145C                 | PNO1          |
| YOR132W                                          | VPS17         | YOR109W                 | INP53         |
| YER054C                                          | GIP2          | YAR014C                 | BUD14         |
| YDL155W                                          | CLB3          | YDR200C                 | VPS64         |
| YOR043W                                          | WHI2          | YOR327C                 | SNC2          |
| YGL025C                                          | PGD1          | YOR035C                 | SHE4          |
| YNL106C                                          | INP52         | YHR115C                 | DMA1          |
| YER120W                                          | SCS2          | YOL018C                 | TLG2          |
| YGR178C                                          | PBP1          | YPR119W                 | CLB2          |
| YLR079W                                          | SIC1          | YDL155W                 | CLB3          |
| YDR443C                                          | SSN2          | YJR032W                 | CPR7          |
| YJL172W                                          | CPS1          | YOR327C                 | SNC2          |
| YML016C                                          | PPZ1          | YLR371W                 | ROM2          |
| YMR055C                                          | BUB2          | YJL190C                 | RPS22A        |
| YMR153W                                          | NUP53         | YER144C                 | UBP5          |
| YOR023C                                          | AHC1          | YNL166C                 | BNI5          |
| YGL147C                                          | RPL9A         | YNL325C                 | FIG4          |
| YIL156W                                          | UBP7          | YML057W                 | CMP2          |
| YIL034C                                          | CAP2          | YDR310C                 | SUM1          |
| YLR058C                                          | SHM2          | YJR005W                 | APL1          |
| YDL020C                                          | RPN4          | YOR195W                 | SLK19         |
| YLR337C                                          | VRP1          | YML095C                 | RAD10         |
| YJL183W                                          | MNN11         | YGR188C                 | BUB1          |
| YDR156W                                          | RPA14         | YMR116C                 | ASC1          |
| YBR200W                                          | BEM1          | YJR135C                 | MCM22         |
| YDL005C                                          | MED2          | YGL151W                 | NUT1          |
| YGR241C                                          | YAP1802       | YBL017C                 | PEP1          |
| YNL201C                                          | PSY2          | YNL107W                 | YAF9          |
| YBR171W                                          | SEC66         | YHR081W                 | LRP1          |

| Predictions at threshold level 0.75 continued... |               |                         |               |
|--------------------------------------------------|---------------|-------------------------|---------------|
| Gene1 of predicted pair                          |               | Gene2 of predicted pair |               |
| Systematic Name                                  | Standard Name | Systematic Name         | Standard Name |
| YLR083C                                          | EMP70         | YCL037C                 | SRO9          |
| YLR315W                                          | NKP2          | YOR141C                 | ARP8          |
| YLR192C                                          | HCR1          | YMR153W                 | NUP53         |
| YDR422C                                          | SIP1          | YDR028C                 | REG1          |
| YLR234W                                          | TOP3          | YLR386W                 | VAC14         |
| YNL264C                                          | PDR17         | YGL223C                 | COG1          |
| YLR399C                                          | BDF1          | YGL019W                 | CKB1          |
| YKR059W                                          | TIF1          | YMR055C                 | BUB2          |
| YCR020C-A                                        | MAK31         | YML001W                 | YPT7          |
| YLR148W                                          | PEP3          | YLR396C                 | VPS33         |
| YGR261C                                          | APL6          | YAR014C                 | BUD14         |
| YBR057C                                          | MUM2          | YPR046W                 | MCM16         |
| YDL180W                                          | YDL180W       | YML038C                 | YMD8          |
| YBR041W                                          | FAT1          | YMR152W                 | YIM1          |
| YIL159W                                          | BNR1          | YER144C                 | UBP5          |
| YPR051W                                          | MAK3          | YPL161C                 | BEM4          |
| YGR072W                                          | UPF3          | YGR105W                 | VMA21         |
| YGR104C                                          | SRB5          | YKL068W                 | NUP100        |
| YOR080W                                          | DIA2          | YER116C                 | SLX8          |
| YMR127C                                          | SAS2          | YDR144C                 | MKC7          |
| YDR108W                                          | GSG1          | YGL212W                 | VAM7          |
| YCL001W                                          | RER1          | YML012W                 | ERV25         |
| YER110C                                          | KAP123        | YGR252W                 | GCN5          |
| YDL160C                                          | DHH1          | YDR192C                 | NUP42         |
| YHR200W                                          | RPN10         | YDR264C                 | AKR1          |
| YJR140C                                          | HIR3          | YGR188C                 | BUB1          |
| YGL212W                                          | VAM7          | YPR030W                 | CSR2          |
| YHR129C                                          | ARP1          | YGL190C                 | CDC55         |
| YER114C                                          | BOI2          | YCR077C                 | PAT1          |

| Predictions at threshold level 0.75 continued... |               |                         |               |
|--------------------------------------------------|---------------|-------------------------|---------------|
| Gene1 of predicted pair                          |               | Gene2 of predicted pair |               |
| Systematic Name                                  | Standard Name | Systematic Name         | Standard Name |
| YJR140C                                          | HIR3          | YMR167W                 | MLH1          |
| YJL095W                                          | BCK1          | YKL041W                 | VPS24         |
| YNL297C                                          | MON2          | YNL127W                 | FAR11         |
| YBR274W                                          | CHK1          | YOR368W                 | RAD17         |
| YLR192C                                          | HCR1          | YGL212W                 | VAM7          |
| YLR102C                                          | APC9          | YPL161C                 | BEM4          |
| YPR018W                                          | RLF2          | YML095C                 | RAD10         |
| YNL291C                                          | MID1          | YMR167W                 | MLH1          |
| YDR213W                                          | UPC2          | YBR127C                 | VMA2          |
| YIL053W                                          | RHR2          | YBR280C                 | SAF1          |
| YJL172W                                          | CPS1          | YGL212W                 | VAM7          |
| YOR069W                                          | VPS5          | YGL223C                 | COG1          |
| YOR127W                                          | RGA1          | YLR309C                 | IMH1          |
| YBL072C                                          | RPS8A         | YDR207C                 | UME6          |
| YGL178W                                          | MPT5          | YLR384C                 | IKI3          |
| YNL058C                                          | YNL058C       | YOR043W                 | WHI2          |
| YJR010C-A                                        | SPC1          | YJL128C                 | PBS2          |
| YKR072C                                          | SIS2          | YLR410W                 | VIP1          |
| YDL020C                                          | RPN4          | YDR318W                 | MCM21         |
| YLR371W                                          | ROM2          | YER122C                 | GLO3          |
| YLR452C                                          | SST2          | YLR094C                 | GIS3          |
| YHR108W                                          | GGA2          | YKL161C                 | YKL161C       |
| YMR095C                                          | SNO1          | YHR081W                 | LRP1          |
| YLR119W                                          | SRN2          | YIL076W                 | SEC28         |
| YPR018W                                          | RLF2          | YHR200W                 | RPN10         |
| YGR261C                                          | APL6          | YKL135C                 | APL2          |
| YJR090C                                          | GRR1          | YEL056W                 | HAT2          |
| YML095C                                          | RAD10         | YKL032C                 | IXR1          |
| YJL127C                                          | SPT10         | YMR179W                 | SPT21         |

| Predictions at threshold level 0.75 continued... |               |                         |               |
|--------------------------------------------------|---------------|-------------------------|---------------|
| Gene1 of predicted pair                          |               | Gene2 of predicted pair |               |
| Systematic Name                                  | Standard Name | Systematic Name         | Standard Name |
| YBR171W                                          | SEC66         | YOL081W                 | IRA2          |
| YEL051W                                          | VMA8          | YDR153C                 | ENT5          |
| YDL160C                                          | DHH1          | YGL208W                 | SIP2          |
| YDR176W                                          | NGG1          | YGL013C                 | PDR1          |
| YOR290C                                          | SNF2          | YPR030W                 | CSR2          |
| YGL133W                                          | ITC1          | YBR084C-A               | RPL19A        |
| YLR234W                                          | TOP3          | YGL250W                 | RMR1          |
| YOR337W                                          | TEA1          | YLR094C                 | GIS3          |
| YLR058C                                          | SHM2          | YNL107W                 | YAF9          |
| YPR171W                                          | BSP1          | YKL213C                 | DOA1          |
| YMR026C                                          | PEX12         | YNL307C                 | MCK1          |
| YBR200W                                          | BEM1          | YLR441C                 | RPS1A         |
| YKL032C                                          | IXR1          | YJL095W                 | BCK1          |
| YOR080W                                          | DIA2          | YGR270W                 | YTA7          |
| YPL105C                                          | YPL105C       | YCL001W                 | RER1          |
| YHR161C                                          | YAP1801       | YDL226C                 | GCS1          |
| YBR108W                                          | YBR108W       | YMR109W                 | MYO5          |
| YDR004W                                          | RAD57         | YDR207C                 | UME6          |
| YBL078C                                          | ATG8          | YLR043C                 | TRX1          |
| YBR171W                                          | SEC66         | YGL253W                 | HXK2          |
| YDR293C                                          | SSD1          | YLR386W                 | VAC14         |
| YGL147C                                          | RPL9A         | YBL103C                 | RTG3          |
| YER120W                                          | SCS2          | YNL238W                 | KEX2          |
| YOR191W                                          | RIS1          | YPL057C                 | SUR1          |
| YHR056C                                          | RSC30         | YCL016C                 | DCC1          |
| YHR060W                                          | VMA22         | YBR019C                 | GAL10         |
| YGR252W                                          | GCN5          | YOR141C                 | ARP8          |
| YDR363W-A                                        | SEM1          | YLR357W                 | RSC2          |
| YJL183W                                          | MNN11         | YGL124C                 | MON1          |



| Predictions at threshold level 0.75 continued... |               |                         |               |
|--------------------------------------------------|---------------|-------------------------|---------------|
| Gene1 of predicted pair                          |               | Gene2 of predicted pair |               |
| Systematic Name                                  | Standard Name | Systematic Name         | Standard Name |
| YER016W                                          | BIM1          | YIL033C                 | BCY1          |
| YOR132W                                          | VPS17         | YCR066W                 | RAD18         |
| YLR234W                                          | TOP3          | YOR195W                 | SLK19         |
| YLR337C                                          | VRP1          | YGL161C                 | YIP5          |
| YCL037C                                          | SRO9          | YGL115W                 | SNF4          |
| YNL243W                                          | SLA2          | YGR229C                 | SMI1          |
| YJL149W                                          | YJL149W       | YJR090C                 | GRR1          |
| YMR153W                                          | NUP53         | YKR099W                 | BAS1          |
| YKL006W                                          | RPL14A        | YPL213W                 | LEA1          |
| YPL024W                                          | RMI1          | YEL056W                 | HAT2          |
| YKL116C                                          | PRR1          | YPL037C                 | EGD1          |
| YGL135W                                          | RPL1B         | YKL041W                 | VPS24         |
| YNL243W                                          | SLA2          | YNL084C                 | END3          |
| YFR010W                                          | UBP6          | YLR421C                 | RPN13         |
| YML001W                                          | YPT7          | YPL195W                 | APL5          |
| YBR200W                                          | BEM1          | YHR115C                 | DMA1          |
| YNL041C                                          | COG6          | YJR032W                 | CPR7          |
| YMR125W                                          | STO1          | YDL047W                 | SIT4          |
| YLR303W                                          | MET17         | YNR065C                 | YNR065C       |
| YER120W                                          | SCS2          | YPL120W                 | VPS30         |
| YDL116W                                          | NUP84         | YMR116C                 | ASC1          |
| YGL212W                                          | VAM7          | YNL297C                 | MON2          |
| YDL160C                                          | DHH1          | YDL047W                 | SIT4          |
| YML112W                                          | CTK3          | YGR188C                 | BUB1          |
| YPL001W                                          | HAT1          | YLL022C                 | HIF1          |
| YNL041C                                          | COG6          | YAL002W                 | VPS8          |
| YFR031C-A                                        | RPL2A         | YDR261C                 | EXG2          |
| YNL032W                                          | SIW14         | YCR053W                 | THR4          |
| YGL003C                                          | CDH1          | YJL095W                 | BCK1          |

| Predictions at threshold level 0.75 continued... |               |                         |               |
|--------------------------------------------------|---------------|-------------------------|---------------|
| Gene1 of predicted pair                          |               | Gene2 of predicted pair |               |
| Systematic Name                                  | Standard Name | Systematic Name         | Standard Name |
| YOL111C                                          | MDY2          | YLR452C                 | SST2          |
| YEL065W                                          | SIT1          | YPL137C                 | GIP3          |
| YKL110C                                          | KTI12         | YPR120C                 | CLB5          |
| YML115C                                          | VAN1          | YDR378C                 | LSM6          |
| YBR126C                                          | TPS1          | YCR053W                 | THR4          |
| YIL076W                                          | SEC28         | YPL137C                 | GIP3          |
| YNL032W                                          | SIW14         | YFL023W                 | BUD27         |
| YKL126W                                          | YPK1          | YDR137W                 | RGP1          |
| YLR337C                                          | VRP1          | YDR254W                 | CHL4          |
| YML001W                                          | YPT7          | YJR084W                 | CSN12         |
| YGR078C                                          | PAC10         | YGL190C                 | CDC55         |
| YLR320W                                          | MMS22         | YJL095W                 | BCK1          |
| YIL159W                                          | BNR1          | YAL020C                 | ATS1          |
| YLR303W                                          | MET17         | YOL126C                 | MDH2          |
| YLR192C                                          | HCR1          | YER040W                 | GLN3          |
| YBR200W                                          | BEM1          | YOR275C                 | RIM20         |
| YHR039C-A                                        | VMA10         | YFR036W                 | CDC26         |
| YLR288C                                          | MEC3          | YDR310C                 | SUM1          |
| YLR360W                                          | VPS38         | YGL212W                 | VAM7          |
| YDR439W                                          | LRS4          | YPR046W                 | MCM16         |
| YER001W                                          | MNN1          | YOR312C                 | RPL20B        |
| YGR020C                                          | VMA7          | YPL161C                 | BEM4          |
| YIL159W                                          | BNR1          | YMR202W                 | ERG2          |
| YKL126W                                          | YPK1          | YER040W                 | GLN3          |
| YHR013C                                          | ARD1          | YJR060W                 | CBF1          |
| YOR054C                                          | VHS3          | YPL240C                 | HSP82         |
| YCR086W                                          | CSM1          | YOR368W                 | RAD17         |
| YJL176C                                          | SWI3          | YMR091C                 | NPL6          |
| YIL034C                                          | CAP2          | YKR048C                 | NAP1          |

| Predictions at threshold level 0.75 continued... |               |                         |               |
|--------------------------------------------------|---------------|-------------------------|---------------|
| Gene1 of predicted pair                          |               | Gene2 of predicted pair |               |
| Systematic Name                                  | Standard Name | Systematic Name         | Standard Name |
| YKL025C                                          | PAN3          | YGR054W                 | YGR054W       |
| YPL180W                                          | TCO89         | YKL041W                 | VPS24         |
| YJR059W                                          | PTK2          | YFL047W                 | RGD2          |
| YIL034C                                          | CAP2          | YBR171W                 | SEC66         |
| YPL022W                                          | RAD1          | YDR071C                 | PAA1          |
| YML115C                                          | VAN1          | YJR032W                 | CPR7          |
| YBR173C                                          | UMP1          | YDR137W                 | RGP1          |
| YBR200W                                          | BEM1          | YJL157C                 | FAR1          |
| YOR035C                                          | SHE4          | YAL030W                 | SNC1          |
| YBR200W                                          | BEM1          | YLR429W                 | CRN1          |
| YNL243W                                          | SLA2          | YOR033C                 | EXO1          |
| YFL023W                                          | BUD27         | YLR094C                 | GIS3          |
| YFR031C-A                                        | RPL2A         | YNL041C                 | COG6          |
| YKR099W                                          | BAS1          | YPL161C                 | BEM4          |
| YDL020C                                          | RPN4          | YBR127C                 | VMA2          |
| YJL136C                                          | RPS21B        | YNL116W                 | DMA2          |
| YHR039C-A                                        | VMA10         | YOR035C                 | SHE4          |
| YJR090C                                          | GRR1          | YHR114W                 | BZZ1          |
| YDR440W                                          | DOT1          | YER139C                 | YER139C       |
| YDR484W                                          | VPS52         | YDR261C                 | EXG2          |
| YLR386W                                          | VAC14         | YBL047C                 | EDE1          |
| YJL006C                                          | CTK2          | YDR200C                 | VPS64         |
| YMR153W                                          | NUP53         | YPL057C                 | SUR1          |
| YOR008C                                          | SLG1          | YNL031C                 | HHT2          |
| YCL001W                                          | RER1          | YER120W                 | SCS2          |
| YER116C                                          | SLX8          | YMR038C                 | CCS1          |
| YPR120C                                          | CLB5          | YEL056W                 | HAT2          |
| YIR003W                                          | YIR003W       | YDR310C                 | SUM1          |
| YKL048C                                          | ELM1          | YNL079C                 | TPM1          |

| Predictions at threshold level 0.75 continued... |               |                         |               |
|--------------------------------------------------|---------------|-------------------------|---------------|
| Gene1 of predicted pair                          |               | Gene2 of predicted pair |               |
| Systematic Name                                  | Standard Name | Systematic Name         | Standard Name |
| YNL307C                                          | MCK1          | YLR371W                 | ROM2          |
| YOR080W                                          | DIA2          | YOR124C                 | UBP2          |
| YMR284W                                          | YKU70         | YJR035W                 | RAD26         |
| YLR288C                                          | MEC3          | YBR215W                 | HPC2          |
| YER162C                                          | RAD4          | YMR311C                 | GLC8          |
| YPL195W                                          | APL5          | YKR030W                 | GMH1          |
| YKL139W                                          | CTK1          | YJR056C                 | YJR056C       |
| YPR131C                                          | NAT3          | YDR318W                 | MCM21         |
| YDL083C                                          | RPS16B        | YBR036C                 | CSG2          |
| YJL006C                                          | CTK2          | YBL101C                 | ECM21         |
| YNL139C                                          | RLR1          | YML062C                 | MFT1          |
| YJR060W                                          | CBF1          | YJL006C                 | CTK2          |
| YCR086W                                          | CSM1          | YOL054W                 | PSH1          |
| YMR109W                                          | MYO5          | YLR447C                 | VMA6          |
| YHR060W                                          | VMA22         | YDR153C                 | ENT5          |
| YNL090W                                          | RHO2          | YPR185W                 | ATG13         |
| YFR010W                                          | UBP6          | YOL145C                 | CTR9          |
| YJL036W                                          | SNX4          | YML001W                 | YPT7          |
| YJL172W                                          | CPS1          | YNL058C                 | YNL058C       |
| YIL008W                                          | URM1          | YDR155C                 | CPR1          |
| YLR452C                                          | SST2          | YJL183W                 | MNN11         |
| YDR225W                                          | HTA1          | YFR010W                 | UBP6          |
| YOR109W                                          | INP53         | YGL054C                 | ERV14         |
| YIL076W                                          | SEC28         | YML038C                 | YMD8          |
| YDR293C                                          | SSD1          | YIL133C                 | RPL16A        |
| YPL057C                                          | SUR1          | YNL058C                 | YNL058C       |
| YAL024C                                          | LTE1          | YNL325C                 | FIG4          |
| YJL124C                                          | LSM1          | YPL253C                 | VIK1          |
| YLL007C                                          | YLL007C       | YLR386W                 | VAC14         |

| Predictions at threshold level 0.75 continued... |               |                         |               |
|--------------------------------------------------|---------------|-------------------------|---------------|
| Gene1 of predicted pair                          |               | Gene2 of predicted pair |               |
| Systematic Name                                  | Standard Name | Systematic Name         | Standard Name |
| YDR480W                                          | DIG2          | YBR083W                 | TEC1          |
| YCR002C                                          | CDC10         | YPL161C                 | BEM4          |
| YDR004W                                          | RAD57         | YNL206C                 | RTT106        |
| YHR114W                                          | BZZ1          | YPR119W                 | CLB2          |
| YHR039C-A                                        | VMA10         | YGL003C                 | CDH1          |
| YGR104C                                          | SRB5          | YLR079W                 | SIC1          |
| YLR095C                                          | IOC2          | YLR093C                 | NYV1          |
| YDL077C                                          | VAM6          | YOL108C                 | INO4          |
| YIL008W                                          | URM1          | YHR012W                 | VPS29         |
| YOR195W                                          | SLK19         | YNL107W                 | YAF9          |
| YBL058W                                          | SHP1          | YBR217W                 | ATG12         |
| YOR337W                                          | TEA1          | YMR142C                 | RPL13B        |
| YBR194W                                          | SOY1          | YPL180W                 | TCO89         |
| YJL095W                                          | BCK1          | YER049W                 | TPA1          |
| YBR200W                                          | BEM1          | YPR030W                 | CSR2          |
| YER144C                                          | UBP5          | YPR036W                 | VMA13         |
| YGR072W                                          | UPF3          | YPL161C                 | BEM4          |
| YBR289W                                          | SNF5          | YHL025W                 | SNF6          |
| YIL076W                                          | SEC28         | YLR180W                 | SAM1          |
| YPL161C                                          | BEM4          | YBL072C                 | RPS8A         |
| YAL024C                                          | LTE1          | YFL023W                 | BUD27         |
| YJR033C                                          | RAV1          | YNL107W                 | YAF9          |
| YML109W                                          | ZDS2          | YBL085W                 | BOI1          |
| YJR135C                                          | MCM22         | YPR046W                 | MCM16         |
| YLR234W                                          | TOP3          | YLR352W                 | YLR352W       |
| YHR013C                                          | ARD1          | YGR270W                 | YTA7          |
| YML115C                                          | VAN1          | YKL032C                 | IXR1          |
| YJL004C                                          | SYS1          | YPR032W                 | SRO7          |
| YHR134W                                          | WSS1          | YGL124C                 | MON1          |

| Predictions at threshold level 0.75 continued... |               |                         |               |
|--------------------------------------------------|---------------|-------------------------|---------------|
| Gene1 of predicted pair                          |               | Gene2 of predicted pair |               |
| Systematic Name                                  | Standard Name | Systematic Name         | Standard Name |
| YOR290C                                          | SNF2          | YLR182W                 | SWI6          |
| YDR378C                                          | LSM6          | YKL213C                 | DOA1          |
| YNL068C                                          | FKH2          | YML095C                 | RAD10         |
| YPR017C                                          | DSS4          | YOR327C                 | SNC2          |
| YBR274W                                          | CHK1          | YMR167W                 | MLH1          |
| YLR234W                                          | TOP3          | YPL018W                 | CTF19         |
| YNL032W                                          | SIW14         | YDL077C                 | VAM6          |
| YEL009C                                          | GCN4          | YLR258W                 | GSY2          |
| YNL025C                                          | SSN8          | YER161C                 | SPT2          |
| YLR410W                                          | VIP1          | YML028W                 | TSA1          |
| YGL223C                                          | COG1          | YPL161C                 | BEM4          |
| YFR031C-A                                        | RPL2A         | YBR036C                 | CSG2          |
| YMR080C                                          | NAM7          | YDR101C                 | ARX1          |
| YKR059W                                          | TIF1          | YGR054W                 | YGR054W       |
| YLR386W                                          | VAC14         | YHR060W                 | VMA22         |
| YCL001W                                          | RER1          | YFL048C                 | EMP47         |
| YPR119W                                          | CLB2          | YOL108C                 | INO4          |
| YGL147C                                          | RPL9A         | YMR142C                 | RPL13B        |
| YKR057W                                          | RPS21A        | YGL031C                 | RPL24A        |
| YHR086W                                          | NAM8          | YDR110W                 | FOB1          |
| YOR327C                                          | SNC2          | YJL164C                 | TPK1          |
| YBL047C                                          | EDE1          | YMR089C                 | YTA12         |
| YDR004W                                          | RAD57         | YGR184C                 | UBR1          |
| YJR135C                                          | MCM22         | YNL225C                 | CNM67         |
| YDR004W                                          | RAD57         | YFL023W                 | BUD27         |
| YHR161C                                          | YAP1801       | YFL026W                 | STE2          |
| YDR146C                                          | SWI5          | YGL151W                 | NUT1          |
| YKL164C                                          | PIR1          | YKL114C                 | APN1          |
| YMR201C                                          | RAD14         | YOL090W                 | MSH2          |

| Predictions at threshold level 0.75 continued... |               |                         |               |
|--------------------------------------------------|---------------|-------------------------|---------------|
| Gene1 of predicted pair                          |               | Gene2 of predicted pair |               |
| Systematic Name                                  | Standard Name | Systematic Name         | Standard Name |
| YKL126W                                          | YPK1          | YBR171W                 | SEC66         |
| YKL048C                                          | ELM1          | YDR358W                 | GGA1          |
| YFR010W                                          | UBP6          | YDR358W                 | GGA1          |
| YBL103C                                          | RTG3          | YOR208W                 | PTP2          |
| YDR137W                                          | RGP1          | YKL048C                 | ELM1          |
| YBR131W                                          | CCZ1          | YKR020W                 | VPS51         |
| YBR107C                                          | IML3          | YNL116W                 | DMA2          |
| YGR014W                                          | MSB2          | YDR363W-A               | SEM1          |
| YBR009C                                          | HHF1          | YOR038C                 | HIR2          |
| YOL126C                                          | MDH2          | YMR273C                 | ZDS1          |
| YJR005W                                          | APL1          | YKL114C                 | APN1          |
| YFL044C                                          | OTU1          | YPR149W                 | NCE102        |
| YNR032W                                          | PPG1          | YOL108C                 | INO4          |
| YPL057C                                          | SUR1          | YDR318W                 | MCM21         |
| YMR133W                                          | REC114        | YDL077C                 | VAM6          |
| YGL078C                                          | DBP3          | YMR230W                 | RPS10B        |
| YDL116W                                          | NUP84         | YGL200C                 | EMP24         |
| YBR279W                                          | PAF1          | YGL094C                 | PAN2          |
| YHR012W                                          | VPS29         | YDR289C                 | RTT103        |
| YPL161C                                          | BEM4          | YOL018C                 | TLG2          |
| YKL116C                                          | PRR1          | YML001W                 | YPT7          |
| YDR155C                                          | CPR1          | YEL056W                 | HAT2          |
| YGR105W                                          | VMA21         | YDL077C                 | VAM6          |
| YER161C                                          | SPT2          | YNL107W                 | YAF9          |
| YPL234C                                          | TFP3          | YKL041W                 | VPS24         |
| YER124C                                          | DSE1          | YBL085W                 | BOI1          |
| YNL078W                                          | NIS1          | YBL085W                 | BOI1          |
| YMR026C                                          | PEX12         | YKL126W                 | YPK1          |
| YNL288W                                          | CAF40         | YPR046W                 | MCM16         |

| Predictions at threshold level 0.75 continued... |               |                         |               |
|--------------------------------------------------|---------------|-------------------------|---------------|
| Gene1 of predicted pair                          |               | Gene2 of predicted pair |               |
| Systematic Name                                  | Standard Name | Systematic Name         | Standard Name |
| YOR069W                                          | VPS5          | YML001W                 | YPT7          |
| YDR293C                                          | SSD1          | YPR046W                 | MCM16         |
| YDL155W                                          | CLB3          | YAR014C                 | BUD14         |
| YJL183W                                          | MNN11         | YMR311C                 | GLC8          |
| YNL127W                                          | FAR11         | YJR033C                 | RAV1          |
| YOR023C                                          | AHC1          | YPR046W                 | MCM16         |
| YKR061W                                          | KTR2          | YIL103W                 | DPH1          |
| YBR030W                                          | YBR030W       | YOR066W                 | MSA1          |
| YML115C                                          | VAN1          | YLR093C                 | NYV1          |
| YKR059W                                          | TIF1          | YML115C                 | VAN1          |
| YMR198W                                          | CIK1          | YDL155W                 | CLB3          |
| YFR010W                                          | UBP6          | YLR315W                 | NKP2          |
| YGR217W                                          | CCH1          | YLR371W                 | ROM2          |
| YPL161C                                          | BEM4          | YGL253W                 | HXK2          |
| YLR371W                                          | ROM2          | YOR327C                 | SNC2          |
| YGL033W                                          | HOP2          | YEL053C                 | MAK10         |
| YEL046C                                          | GLY1          | YPL249C                 | GYP5          |
| YER179W                                          | DMC1          | YGR184C                 | UBR1          |
| YBL025W                                          | RRN10         | YOL081W                 | IRA2          |
| YGL115W                                          | SNF4          | YNL238W                 | KEX2          |
| YIL159W                                          | BNR1          | YMR311C                 | GLC8          |
| YIL159W                                          | BNR1          | YER122C                 | GLO3          |
| YIL159W                                          | BNR1          | YLR370C                 | ARC18         |
| YNL068C                                          | FKH2          | YKR048C                 | NAP1          |
| YIL076W                                          | SEC28         | YBR036C                 | CSG2          |
| YBR274W                                          | CHK1          | YGL151W                 | NUT1          |
| YLR018C                                          | POM34         | YLR131C                 | ACE2          |
| YMR080C                                          | NAM7          | YPL024W                 | RMI1          |
| YPL213W                                          | LEA1          | YBL072C                 | RPS8A         |



| Predictions at threshold level 0.75 continued... |               |                         |               |
|--------------------------------------------------|---------------|-------------------------|---------------|
| Gene1 of predicted pair                          |               | Gene2 of predicted pair |               |
| Systematic Name                                  | Standard Name | Systematic Name         | Standard Name |
| YLR315W                                          | NKP2          | YER122C                 | GLO3          |
| YKL139W                                          | CTK1          | YCL037C                 | SRO9          |
| YNL288W                                          | CAF40         | YGL253W                 | HXK2          |
| YLR234W                                          | TOP3          | YMR116C                 | ASC1          |
| YFR036W                                          | CDC26         | YLR032W                 | RAD5          |
| YDL161W                                          | ENT1          | YGL095C                 | VPS45         |
| YOR033C                                          | EXO1          | YOR080W                 | DIA2          |
| YDR156W                                          | RPA14         | YPL253C                 | VIK1          |
| YOR270C                                          | VPH1          | YLR447C                 | VMA6          |
| YPL161C                                          | BEM4          | YKR030W                 | GMH1          |
| YBR041W                                          | FAT1          | YLR320W                 | MMS22         |
| YPL129W                                          | TAF14         | YDL002C                 | NHP10         |
| YGL147C                                          | RPL9A         | YGR249W                 | MGA1          |
| YBR194W                                          | SOY1          | YJL124C                 | LSM1          |
| YDR363W-A                                        | SEM1          | YPL018W                 | CTF19         |
| YDL020C                                          | RPN4          | YOL051W                 | GAL11         |
| YDL184C                                          | RPL41A        | YJL172W                 | CPS1          |
| YNL199C                                          | GCR2          | YEL013W                 | VAC8          |
| YDR383C                                          | NKP1          | YHR013C                 | ARD1          |
| YPR018W                                          | RLF2          | YNL236W                 | SIN4          |
| YPL022W                                          | RAD1          | YBR215W                 | HPC2          |
| YOR132W                                          | VPS17         | YNL238W                 | KEX2          |
| YIR003W                                          | YIR003W       | YKL204W                 | EAP1          |
| YKL110C                                          | KTI12         | YML112W                 | CTK3          |
| YDR484W                                          | VPS52         | YBR171W                 | SEC66         |
| YNL076W                                          | MKS1          | YNL082W                 | PMS1          |
| YBL102W                                          | SFT2          | YDR320C                 | SWA2          |
| YMR224C                                          | MRE11         | YJL006C                 | CTK2          |
| YDR004W                                          | RAD57         | YPR131C                 | NAT3          |

| Predictions at threshold level 0.75 continued... |               |                         |               |
|--------------------------------------------------|---------------|-------------------------|---------------|
| Gene1 of predicted pair                          |               | Gene2 of predicted pair |               |
| Systematic Name                                  | Standard Name | Systematic Name         | Standard Name |
| YKL048C                                          | ELM1          | YOR043W                 | WHI2          |
| YLR386W                                          | VAC14         | YGR188C                 | BUB1          |
| YBR030W                                          | YBR030W       | YDR484W                 | VPS52         |
| YBR108W                                          | YBR108W       | YPR036W                 | VMA13         |
| YGL087C                                          | MMS2          | YNL307C                 | MCK1          |
| YKL010C                                          | UFD4          | YBR082C                 | UBC4          |
| YPL001W                                          | HAT1          | YEL056W                 | HAT2          |
| YEL043W                                          | YEL043W       | YGL054C                 | ERV14         |
| YKL048C                                          | ELM1          | YJR063W                 | RPA12         |
| YOR156C                                          | NFI1          | YDR440W                 | DOT1          |
| YLR192C                                          | HCR1          | YNL076W                 | MKS1          |
| YPL234C                                          | TFP3          | YDR310C                 | SUM1          |
| YIR005W                                          | IST3          | YLR350W                 | ORM2          |
| YJL004C                                          | SYS1          | YAL002W                 | VPS8          |
| YMR224C                                          | MRE11         | YLR135W                 | SLX4          |
| YLR234W                                          | TOP3          | YLR233C                 | EST1          |
| YKL048C                                          | ELM1          | YMR038C                 | CCS1          |
| YKL160W                                          | ELF1          | YHR108W                 | GGA2          |
| YKL048C                                          | ELM1          | YGR054W                 | YGR054W       |
| YBR108W                                          | YBR108W       | YER162C                 | RAD4          |
| YLR371W                                          | ROM2          | YJR084W                 | CSN12         |
| YJR040W                                          | GEF1          | YER120W                 | SCS2          |
| YOR195W                                          | SLK19         | YNL229C                 | URE2          |
| YDR129C                                          | SAC6          | YML016C                 | PPZ1          |
| YFR031C-A                                        | RPL2A         | YHR012W                 | VPS29         |
| YDR477W                                          | SNF1          | YPL037C                 | EGD1          |
| YKL006W                                          | RPL14A        | YMR116C                 | ASC1          |
| YOR043W                                          | WHI2          | YPL158C                 | YPL158C       |
| YLR337C                                          | VRP1          | YGL237C                 | HAP2          |

| Predictions at threshold level 0.75 continued... |               |                         |               |
|--------------------------------------------------|---------------|-------------------------|---------------|
| Gene1 of predicted pair                          |               | Gene2 of predicted pair |               |
| Systematic Name                                  | Standard Name | Systematic Name         | Standard Name |
| YAL024C                                          | LTE1          | YMR224C                 | MRE11         |
| YLR337C                                          | VRP1          | YLR233C                 | EST1          |
| YML095C                                          | RAD10         | YPR120C                 | CLB5          |
| YGR135W                                          | PRE9          | YDR440W                 | DOT1          |
| YLR422W                                          | YLR422W       | YOR344C                 | TYE7          |
| YJR063W                                          | RPA12         | YLR315W                 | NKP2          |
| YJR063W                                          | RPA12         | YNL225C                 | CNM67         |
| YDL184C                                          | RPL41A        | YML071C                 | COG8          |
| YMR152W                                          | YIM1          | YLR370C                 | ARC18         |
| YER019C-A                                        | SBH2          | YOR085W                 | OST3          |
| YPL022W                                          | RAD1          | YBR114W                 | RAD16         |
| YML095C                                          | RAD10         | YNL236W                 | SIN4          |
| YCL037C                                          | SRO9          | YOR109W                 | INP53         |
| YKR072C                                          | SIS2          | YBR228W                 | SLX1          |
| YMR273C                                          | ZDS1          | YKL068W                 | NUP100        |
| YBR030W                                          | YBR030W       | YDL192W                 | ARF1          |
| YBR173C                                          | UMP1          | YLR370C                 | ARC18         |
| YHR178W                                          | STB5          | YOR127W                 | RGA1          |
| YDR156W                                          | RPA14         | YPR046W                 | MCM16         |
| YLR095C                                          | IOC2          | YNL238W                 | KEX2          |
| YDR137W                                          | RGP1          | YBR036C                 | CSG2          |
| YLR320W                                          | MMS22         | YER139C                 | YER139C       |
| YMR092C                                          | AIP1          | YLR429W                 | CRN1          |
| YJL106W                                          | IME2          | YDR207C                 | UME6          |
| YML016C                                          | PPZ1          | YDR310C                 | SUM1          |
| YDR202C                                          | RAV2          | YGL223C                 | COG1          |
| YNL032W                                          | SIW14         | YGL003C                 | CDH1          |
| YPR017C                                          | DSS4          | YNL238W                 | KEX2          |
| YGL200C                                          | EMP24         | YGL054C                 | ERV14         |

| Predictions at threshold level 0.75 continued... |               |                         |               |
|--------------------------------------------------|---------------|-------------------------|---------------|
| Gene1 of predicted pair                          |               | Gene2 of predicted pair |               |
| Systematic Name                                  | Standard Name | Systematic Name         | Standard Name |
| YIL076W                                          | SEC28         | YHL031C                 | GOS1          |
| YNL031C                                          | HHT2          | YBR289W                 | SNF5          |
| YDR490C                                          | PKH1          | YPL004C                 | LSP1          |
| YLR083C                                          | EMP70         | YGR072W                 | UPF3          |
| YGL212W                                          | VAM7          | YCR066W                 | RAD18         |
| YKR035W-A                                        | DID2          | YBR280C                 | SAF1          |
| YPL042C                                          | SSN3          | YIL038C                 | NOT3          |
| YBL102W                                          | SFT2          | YKR030W                 | GMH1          |
| YML001W                                          | YPT7          | YDR207C                 | UME6          |
| YGR081C                                          | SLX9          | YKL068W                 | NUP100        |
| YNL093W                                          | YPT53         | YKR014C                 | YPT52         |
| YMR198W                                          | CIK1          | YGL124C                 | MON1          |
| YBL058W                                          | SHP1          | YKL126W                 | YPK1          |
| YCL037C                                          | SRO9          | YDR310C                 | SUM1          |
| YKL025C                                          | PAN3          | YLR292C                 | SEC72         |
| YDR293C                                          | SSD1          | YHR134W                 | WSS1          |
| YHL031C                                          | GOS1          | YPL161C                 | BEM4          |
| YGR071C                                          | YGR071C       | YJR135C                 | MCM22         |
| YDR469W                                          | SDC1          | YLR357W                 | RSC2          |
| YKL080W                                          | VMA5          | YKL119C                 | VPH2          |
| YDR004W                                          | RAD57         | YGL066W                 | SGF73         |
| YGR261C                                          | APL6          | YJR040W                 | GEF1          |
| YDL223C                                          | HBT1          | YEL060C                 | PRB1          |
| YJL060W                                          | BNA3          | YLR381W                 | CTF3          |
| YIL159W                                          | BNR1          | YMR133W                 | REC114        |
| YJL172W                                          | CPS1          | YER044C                 | ERG28         |
| YBR217W                                          | ATG12         | YDR310C                 | SUM1          |
| YOR096W                                          | RPS7A         | YHR203C                 | RPS4B         |
| YDR484W                                          | VPS52         | YDL077C                 | VAM6          |

| Predictions at threshold level 0.75 continued... |               |                         |               |
|--------------------------------------------------|---------------|-------------------------|---------------|
| Gene1 of predicted pair                          |               | Gene2 of predicted pair |               |
| Systematic Name                                  | Standard Name | Systematic Name         | Standard Name |
| YCL037C                                          | SRO9          | YDL006W                 | PTC1          |
| YOL043C                                          | NTG2          | YAL015C                 | NTG1          |
| YLR386W                                          | VAC14         | YDR484W                 | VPS52         |
| YGL087C                                          | MMS2          | YBL047C                 | EDE1          |
| YLR360W                                          | VPS38         | YGR105W                 | VMA21         |
| YDR155C                                          | CPR1          | YJL190C                 | RPS22A        |
| YOL111C                                          | MDY2          | YER122C                 | GLO3          |
| YMR153W                                          | NUP53         | YDL192W                 | ARF1          |
| YNL051W                                          | COG5          | YLR309C                 | IMH1          |
| YEL043W                                          | YEL043W       | YHR012W                 | VPS29         |
| YMR095C                                          | SNO1          | YOR327C                 | SNC2          |
| YLR429W                                          | CRN1          | YDR318W                 | MCM21         |
| YMR125W                                          | STO1          | YGR059W                 | SPR3          |
| YDR146C                                          | SWI5          | YDL002C                 | NHP10         |
| YNL199C                                          | GCR2          | YER161C                 | SPT2          |
| YNL288W                                          | CAF40         | YER068W                 | MOT2          |
| YJL124C                                          | LSM1          | YHR167W                 | THP2          |
| YBR200W                                          | BEM1          | YKL101W                 | HSL1          |
| YGR003W                                          | CUL3          | YJR099W                 | YUH1          |
| YER115C                                          | SPR6          | YER110C                 | KAP123        |
| YEL053C                                          | MAK10         | YPR046W                 | MCM16         |
| YOR106W                                          | VAM3          | YDR456W                 | NHX1          |
| YNR052C                                          | POP2          | YJL006C                 | CTK2          |
| YIL076W                                          | SEC28         | YPR030W                 | CSR2          |
| YPR131C                                          | NAT3          | YGL175C                 | SAE2          |
| YIL034C                                          | CAP2          | YMR109W                 | MYO5          |
| YOR127W                                          | RGA1          | YHR200W                 | RPN10         |
| YNL297C                                          | MON2          | YDL006W                 | PTC1          |
| YEL053C                                          | MAK10         | YGR105W                 | VMA21         |

| Predictions at threshold level 0.75 continued... |               |                         |               |
|--------------------------------------------------|---------------|-------------------------|---------------|
| Gene1 of predicted pair                          |               | Gene2 of predicted pair |               |
| Systematic Name                                  | Standard Name | Systematic Name         | Standard Name |
| YDR171W                                          | HSP42         | YJL006C                 | CTK2          |
| YIL076W                                          | SEC28         | YMR054W                 | STV1          |
| YBL102W                                          | SFT2          | YCL001W                 | RER1          |
| YOR106W                                          | VAM3          | YNL297C                 | MON2          |
| YDR320C                                          | SWA2          | YJL053W                 | PEP8          |
| YBL003C                                          | HTA2          | YLR357W                 | RSC2          |
| YNL289W                                          | PCL1          | YPR119W                 | CLB2          |
| YDR383C                                          | NKP1          | YJR135C                 | MCM22         |
| YHR039C-A                                        | VMA10         | YLR371W                 | ROM2          |
| YKR020W                                          | VPS51         | YLR371W                 | ROM2          |
| YDR144C                                          | MKC7          | YDR155C                 | CPR1          |
| YOR195W                                          | SLK19         | YJR060W                 | CBF1          |
| YMR231W                                          | PEP5          | YMR038C                 | CCS1          |
| YGL175C                                          | SAE2          | YLR032W                 | RAD5          |
| YNL271C                                          | BNI1          | YEL022W                 | GEA2          |
| YOR156C                                          | NFI1          | YKR095W                 | MLP1          |
| YNL199C                                          | GCR2          | YML057W                 | CMP2          |
| YGR184C                                          | UBR1          | YGR188C                 | BUB1          |
| YDR289C                                          | RTT103        | YHL002W                 | HSE1          |
| YML115C                                          | VAN1          | YNL325C                 | FIG4          |
| YPL024W                                          | RMI1          | YMR026C                 | PEX12         |
| YDL083C                                          | RPS16B        | YMR311C                 | GLC8          |
| YKR099W                                          | BAS1          | YEL060C                 | PRB1          |
| YDR389W                                          | SAC7          | YHL031C                 | GOS1          |
| YNL044W                                          | YIP3          | YML012W                 | ERV25         |
| YDL184C                                          | RPL41A        | YJL183W                 | MNN11         |
| YPL161C                                          | BEM4          | YDR264C                 | AKR1          |
| YMR224C                                          | MRE11         | YBR200W                 | BEM1          |
| YPL161C                                          | BEM4          | YMR133W                 | REC114        |

| Predictions at threshold level 0.75 continued... |               |                         |               |
|--------------------------------------------------|---------------|-------------------------|---------------|
| Gene1 of predicted pair                          |               | Gene2 of predicted pair |               |
| Systematic Name                                  | Standard Name | Systematic Name         | Standard Name |
| YOR033C                                          | EXO1          | YMR167W                 | MLH1          |
| YHR156C                                          | LIN1          | YBL103C                 | RTG3          |
| YCR086W                                          | CSM1          | YJR035W                 | RAD26         |
| YOR275C                                          | RIM20         | YGL031C                 | RPL24A        |
| YMR216C                                          | SKY1          | YDL006W                 | PTC1          |
| YLR095C                                          | IOC2          | YDR261C                 | EXG2          |
| YNL069C                                          | RPL16B        | YKR020W                 | VPS51         |
| YIL045W                                          | PIG2          | YAR014C                 | BUD14         |
| YHR060W                                          | VMA22         | YKR030W                 | GMH1          |
| YKL032C                                          | IXR1          | YHR200W                 | RPN10         |
| YKL117W                                          | SBA1          | YPL246C                 | RBD2          |
| YNL307C                                          | MCK1          | YLR320W                 | MMS22         |
| YOR290C                                          | SNF2          | YKR099W                 | BAS1          |
| YJL176C                                          | SWI3          | YGR133W                 | PEX4          |
| YDR254W                                          | CHL4          | YDL155W                 | CLB3          |
| YCR066W                                          | RAD18         | YDR310C                 | SUM1          |
| YIL159W                                          | BNR1          | YLR398C                 | SKI2          |
| YOR140W                                          | SFL1          | YDR456W                 | NHX1          |
| YOR195W                                          | SLK19         | YKL032C                 | IXR1          |
| YEL043W                                          | YEL043W       | YDR153C                 | ENT5          |
| YDR137W                                          | RGP1          | YKL213C                 | DOA1          |
| YFL023W                                          | BUD27         | YHR200W                 | RPN10         |
| YHR103W                                          | SBE22         | YPR119W                 | CLB2          |
| YJL036W                                          | SNX4          | YJR033C                 | RAV1          |
| YOR127W                                          | RGA1          | YDR108W                 | GSG1          |
| YMR153W                                          | NUP53         | YEL053C                 | MAK10         |
| YDL116W                                          | NUP84         | YJR090C                 | GRR1          |
| YNL293W                                          | MSB3          | YOR327C                 | SNC2          |
| YFR036W                                          | CDC26         | YJR084W                 | CSN12         |

| Predictions at threshold level 0.75 continued... |               |                         |               |
|--------------------------------------------------|---------------|-------------------------|---------------|
| Gene1 of predicted pair                          |               | Gene2 of predicted pair |               |
| Systematic Name                                  | Standard Name | Systematic Name         | Standard Name |
| YKL048C                                          | ELM1          | YML001W                 | YPT7          |
| YMR224C                                          | MRE11         | YGL124C                 | MON1          |
| YFL033C                                          | RIM15         | YNR032W                 | PPG1          |
| YKL007W                                          | CAP1          | YBR200W                 | BEM1          |
| YLR093C                                          | NYV1          | YCR053W                 | THR4          |
| YDL020C                                          | RPN4          | YJL154C                 | VPS35         |
| YBR171W                                          | SEC66         | YDL155W                 | CLB3          |
| YBL103C                                          | RTG3          | YGL025C                 | PGD1          |
| YLR234W                                          | TOP3          | YEL056W                 | HAT2          |
| YPL253C                                          | VIK1          | YGL124C                 | MON1          |
| YOL121C                                          | RPS19A        | YDR207C                 | UME6          |
| YLL007C                                          | YLL007C       | YMR109W                 | MYO5          |
| YMR133W                                          | REC114        | YLR180W                 | SAM1          |
| YMR055C                                          | BUB2          | YGL031C                 | RPL24A        |
| YGL200C                                          | EMP24         | YKR020W                 | VPS51         |
| YOR337W                                          | TEA1          | YLR180W                 | SAM1          |
| YGL115W                                          | SNF4          | YPL120W                 | VPS30         |
| YKR001C                                          | VPS1          | YDR153C                 | ENT5          |
| YLR191W                                          | PEX13         | YAL055W                 | PEX22         |
| YPR029C                                          | APL4          | YDR358W                 | GGA1          |
| YJL176C                                          | SWI3          | YMR116C                 | ASC1          |
| YMR198W                                          | CIK1          | YMR055C                 | BUB2          |
| YLR452C                                          | SST2          | YBR019C                 | GAL10         |
| YML115C                                          | VAN1          | YPL234C                 | TFP3          |
| YBR126C                                          | TPS1          | YLR452C                 | SST2          |
| YBR030W                                          | YBR030W       | YMR153W                 | NUP53         |
| YLL039C                                          | UBI4          | YPL161C                 | BEM4          |
| YPR131C                                          | NAT3          | YKR072C                 | SIS2          |
| YGR261C                                          | APL6          | YMR054W                 | STV1          |



| Predictions at threshold level 0.75 continued... |               |                         |               |
|--------------------------------------------------|---------------|-------------------------|---------------|
| Gene1 of predicted pair                          |               | Gene2 of predicted pair |               |
| Systematic Name                                  | Standard Name | Systematic Name         | Standard Name |
| YNL329C                                          | PEX6          | YJL095W                 | BCK1          |
| YBL051C                                          | PIN4          | YPL018W                 | CTF19         |
| YER032W                                          | FIR1          | YHR152W                 | SPO12         |
| YBR126C                                          | TPS1          | YML100W                 | TSL1          |
| YCL001W                                          | RER1          | YJR060W                 | CBF1          |
| YKL068W                                          | NUP100        | YBR010W                 | HHT1          |
| YHL031C                                          | GOS1          | YER120W                 | SCS2          |
| YPL158C                                          | YPL158C       | YLR425W                 | TUS1          |
| YML016C                                          | PPZ1          | YAR014C                 | BUD14         |
| YDR155C                                          | CPR1          | YJL183W                 | MNN11         |
| YIL159W                                          | BNR1          | YPR036W                 | VMA13         |
| YKR020W                                          | VPS51         | YDL226C                 | GCS1          |
| YKL116C                                          | PRR1          | YOL121C                 | RPS19A        |
| YDR383C                                          | NKP1          | YPR046W                 | MCM16         |
| YPR120C                                          | CLB5          | YIR005W                 | IST3          |
| YDR254W                                          | CHL4          | YIL103W                 | DPH1          |
| YJR135C                                          | MCM22         | YOL054W                 | PSH1          |
| YHR200W                                          | RPN10         | YBR036C                 | CSG2          |
| YLR456W                                          | YLR456W       | YER032W                 | FIR1          |
| YOR069W                                          | VPS5          | YKR001C                 | VPS1          |
| YDL006W                                          | PTC1          | YPR032W                 | SRO7          |
| YOL013C                                          | HRD1          | YLR207W                 | HRD3          |
| YLR192C                                          | HCR1          | YJR056C                 | YJR056C       |
| YFR010W                                          | UBP6          | YJL095W                 | BCK1          |
| YFL013C                                          | IES1          | YDR335W                 | MSN5          |
| YBR290W                                          | BSD2          | YNL107W                 | YAF9          |
| YPL024W                                          | RMI1          | YOR270C                 | VPH1          |
| YER116C                                          | SLX8          | YNR072W                 | HXT17         |
| YOR066W                                          | MSA1          | YNL076W                 | MKS1          |

| Predictions at threshold level 0.75 continued... |               |                         |               |
|--------------------------------------------------|---------------|-------------------------|---------------|
| Gene1 of predicted pair                          |               | Gene2 of predicted pair |               |
| Systematic Name                                  | Standard Name | Systematic Name         | Standard Name |
| YMR055C                                          | BUB2          | YAL002W                 | VPS8          |
| YGR100W                                          | MDR1          | YGL198W                 | YIP4          |
| YHL031C                                          | GOS1          | YLR309C                 | IMH1          |
| YNL076W                                          | MKS1          | YMR230W                 | RPS10B        |
| YMR198W                                          | CIK1          | YPL022W                 | RAD1          |
| YDR477W                                          | SNF1          | YOR327C                 | SNC2          |
| YOR270C                                          | VPH1          | YFL004W                 | VTC2          |
| YHR152W                                          | SPO12         | YHR111W                 | UBA4          |
| YBL088C                                          | TEL1          | YPR120C                 | CLB5          |
| YPL161C                                          | BEM4          | YOR141C                 | ARP8          |
| YMR133W                                          | REC114        | YOR066W                 | MSA1          |
| YBL051C                                          | PIN4          | YKR020W                 | VPS51         |
| YIL148W                                          | RPL40A        | YER115C                 | SPR6          |
| YAL024C                                          | LTE1          | YIL053W                 | RHR2          |
| YDR484W                                          | VPS52         | YNL307C                 | MCK1          |
| YLR381W                                          | CTF3          | YFR036W                 | CDC26         |
| YDL020C                                          | RPN4          | YEL027W                 | CUP5          |
| YFL023W                                          | BUD27         | YLR452C                 | SST2          |
| YDR358W                                          | GGA1          | YPL195W                 | APL5          |
| YNL325C                                          | FIG4          | YER162C                 | RAD4          |
| YBR084C-A                                        | RPL19A        | YGL246C                 | RAI1          |
| YOR127W                                          | RGA1          | YNL127W                 | FAR11         |
| YJR060W                                          | CBF1          | YPL120W                 | VPS30         |
| YGL200C                                          | EMP24         | YDL155W                 | CLB3          |
| YMR116C                                          | ASC1          | YGR217W                 | CCH1          |
| YLR399C                                          | BDF1          | YJR135C                 | MCM22         |
| YAL024C                                          | LTE1          | YOR290C                 | SNF2          |
| YOR109W                                          | INP53         | YNR032W                 | PPG1          |
| YFR008W                                          | FAR7          | YDR200C                 | VPS64         |

| Predictions at threshold level 0.75 continued... |               |                         |               |
|--------------------------------------------------|---------------|-------------------------|---------------|
| Gene1 of predicted pair                          |               | Gene2 of predicted pair |               |
| Systematic Name                                  | Standard Name | Systematic Name         | Standard Name |
| YDR456W                                          | NHX1          | YER096W                 | SHC1          |
| YPR030W                                          | CSR2          | YML071C                 | COG8          |
| YPR036W                                          | VMA13         | YJR084W                 | CSN12         |
| YHL002W                                          | HSE1          | YDR310C                 | SUM1          |
| YML038C                                          | YMD8          | YNL238W                 | KEX2          |
| YLR234W                                          | TOP3          | YOR001W                 | RRP6          |
| YGL163C                                          | RAD54         | YKL068W                 | NUP100        |
| YOR001W                                          | RRP6          | YAL002W                 | VPS8          |
| YBR289W                                          | SNF5          | YJL140W                 | RPB4          |
| YHR156C                                          | LIN1          | YLR094C                 | GIS3          |
| YDR439W                                          | LRS4          | YGR270W                 | YTA7          |
| YNL215W                                          | IES2          | YBR278W                 | DPB3          |
| YBR290W                                          | BSD2          | YMR153W                 | NUP53         |
| YHR152W                                          | SPO12         | YKL048C                 | ELM1          |
| YNR032W                                          | PPG1          | YPR032W                 | SRO7          |
| YJL053W                                          | PEP8          | YOR109W                 | INP53         |
| YEL043W                                          | YEL043W       | YAL002W                 | VPS8          |
| YOR337W                                          | TEA1          | YDL184C                 | RPL41A        |
| YCL073C                                          | YCL073C       | YPL240C                 | HSP82         |
| YLR061W                                          | RPL22A        | YOR035C                 | SHE4          |
| YHL031C                                          | GOS1          | YOR308C                 | SNU66         |
| YHR073W                                          | OSH3          | YML057W                 | CMP2          |
| YOR270C                                          | VPH1          | YMR230W                 | RPS10B        |
| YLR396C                                          | VPS33         | YLR093C                 | NYV1          |
| YER044C                                          | ERG28         | YJR084W                 | CSN12         |
| YGL215W                                          | CLG1          | YDR385W                 | EFT2          |
| YOR185C                                          | GSP2          | YGL016W                 | KAP122        |
| YLR381W                                          | CTF3          | YLR150W                 | STM1          |
| YLR337C                                          | VRP1          | YLL039C                 | UBI4          |

| Predictions at threshold level 0.75 continued... |               |                         |               |
|--------------------------------------------------|---------------|-------------------------|---------------|
| Gene1 of predicted pair                          |               | Gene2 of predicted pair |               |
| Systematic Name                                  | Standard Name | Systematic Name         | Standard Name |
| YKL048C                                          | ELM1          | YBR082C                 | UBC4          |
| YBL058W                                          | SHP1          | YER139C                 | YER139C       |
| YOR033C                                          | EXO1          | YOR368W                 | RAD17         |
| YNL044W                                          | YIP3          | YML071C                 | COG8          |
| YIL008W                                          | URM1          | YKR048C                 | NAP1          |
| YDR477W                                          | SNF1          | YOL145C                 | CTR9          |
| YNL248C                                          | RPA49         | YDR318W                 | MCM21         |
| YGL124C                                          | MON1          | YLR370C                 | ARC18         |
| YLR234W                                          | TOP3          | YNL307C                 | MCK1          |
| YNL215W                                          | IES2          | YNL054W                 | VAC7          |
| YBR194W                                          | SOY1          | YDR378C                 | LSM6          |
| YNL016W                                          | PUB1          | YML028W                 | TSA1          |
| YBR200W                                          | BEM1          | YPR036W                 | VMA13         |
| YNL218W                                          | MGS1          | YML028W                 | TSA1          |
| YHR081W                                          | LRP1          | YDR358W                 | GGA1          |
| YBL051C                                          | PIN4          | YOR327C                 | SNC2          |
| YLR337C                                          | VRP1          | YJL006C                 | CTK2          |
| YMR153W                                          | NUP53         | YJL172W                 | CPS1          |
| YLR386W                                          | VAC14         | YNL229C                 | URE2          |
| YDR335W                                          | MSN5          | YPL018W                 | CTF19         |
| YPL106C                                          | SSE1          | YDL226C                 | GCS1          |
| YJL151C                                          | SNA3          | YMR253C                 | YMR253C       |
| YFL033C                                          | RIM15         | YAR014C                 | BUD14         |
| YGL078C                                          | DBP3          | YBL103C                 | RTG3          |
| YDR378C                                          | LSM6          | YJR063W                 | RPA12         |
| YMR284W                                          | YKU70         | YMR038C                 | CCS1          |
| YMR224C                                          | MRE11         | YKL068W                 | NUP100        |
| YPL253C                                          | VIK1          | YOR141C                 | ARP8          |
| YDR245W                                          | MNN10         | YGL174W                 | BUD13         |

| Predictions at threshold level 0.75 continued... |               |                         |               |
|--------------------------------------------------|---------------|-------------------------|---------------|
| Gene1 of predicted pair                          |               | Gene2 of predicted pair |               |
| Systematic Name                                  | Standard Name | Systematic Name         | Standard Name |
| YGL212W                                          | VAM7          | YBL072C                 | RPS8A         |
| YCR039C                                          | MATALPHA2     | YDR451C                 | YHP1          |
| YLR360W                                          | VPS38         | YEL043W                 | YEL043W       |
| YPL042C                                          | SSN3          | YOR001W                 | RRP6          |
| YBL051C                                          | PIN4          | YCR086W                 | CSM1          |
| YDR318W                                          | MCM21         | YOR141C                 | ARP8          |
| YPL024W                                          | RMI1          | YLR288C                 | MEC3          |
| YIL159W                                          | BNR1          | YOR290C                 | SNF2          |
| YPL115C                                          | BEM3          | YKL048C                 | ELM1          |
| YML115C                                          | VAN1          | YBL072C                 | RPS8A         |
| YLR447C                                          | VMA6          | YNL107W                 | YAF9          |
| YDL101C                                          | DUN1          | YJR035W                 | RAD26         |
| YBR200W                                          | BEM1          | YOR014W                 | RTS1          |
| YHR171W                                          | ATG7          | YOR106W                 | VAM3          |
| YML095C                                          | RAD10         | YPL256C                 | CLN2          |
| YDR477W                                          | SNF1          | YOR290C                 | SNF2          |
| YDL184C                                          | RPL41A        | YDR261C                 | EXG2          |
| YDR129C                                          | SAC6          | YGL153W                 | PEX14         |
| YOR001W                                          | RRP6          | YLR315W                 | NKP2          |
| YDR320C                                          | SWA2          | YJL036W                 | SNX4          |
| YGL033W                                          | HOP2          | YJR032W                 | CPR7          |
| YMR095C                                          | SNO1          | YDR484W                 | VPS52         |
| YDL020C                                          | RPN4          | YBR114W                 | RAD16         |
| YLR292C                                          | SEC72         | YOL067C                 | RTG1          |
| YNL297C                                          | MON2          | YOR327C                 | SNC2          |
| YMR116C                                          | ASC1          | YOR035C                 | SHE4          |
| YGL087C                                          | MMS2          | YML016C                 | PPZ1          |
| YBL008W                                          | HIR1          | YJL138C                 | TIF2          |
| YLR360W                                          | VPS38         | YOR014W                 | RTS1          |

| Predictions at threshold level 0.75 continued... |               |                         |               |
|--------------------------------------------------|---------------|-------------------------|---------------|
| Gene1 of predicted pair                          |               | Gene2 of predicted pair |               |
| Systematic Name                                  | Standard Name | Systematic Name         | Standard Name |
| YDR076W                                          | RAD55         | YOR368W                 | RAD17         |
| YPL024W                                          | RMI1          | YOR032C                 | HMS1          |
| YHR010W                                          | RPL27A        | YDR207C                 | UME6          |
| YDL020C                                          | RPN4          | YFR010W                 | UBP6          |
| YOR109W                                          | INP53         | YKR020W                 | VPS51         |
| YJL154C                                          | VPS35         | YOR132W                 | VPS17         |
| YMR039C                                          | SUB1          | YOR038C                 | HIR2          |
| YML115C                                          | VAN1          | YER122C                 | GLO3          |
| YBR274W                                          | CHK1          | YKL101W                 | HSL1          |
| YPL213W                                          | LEA1          | YOL081W                 | IRA2          |
| YNL243W                                          | SLA2          | YLR039C                 | RIC1          |
| YJL154C                                          | VPS35         | YJL029C                 | VPS53         |
| YEL053C                                          | MAK10         | YDL155W                 | CLB3          |
| YLR090W                                          | XDJ1          | YLR452C                 | SST2          |
| YJL204C                                          | RCY1          | YDR139C                 | RUB1          |
| YMR224C                                          | MRE11         | YDL059C                 | RAD59         |
| YLR095C                                          | IOC2          | YGL078C                 | DBP3          |
| YJL136C                                          | RPS21B        | YHR115C                 | DMA1          |
| YHL031C                                          | GOS1          | YDR207C                 | UME6          |
| YBR126C                                          | TPS1          | YOR337W                 | TEA1          |
| YPL018W                                          | CTF19         | YGL124C                 | MON1          |
| YNL032W                                          | SIW14         | YLR452C                 | SST2          |
| YML115C                                          | VAN1          | YDR146C                 | SWI5          |
| YOL030W                                          | GAS5          | YDL013W                 | SLX5          |
| YOL111C                                          | MDY2          | YDR310C                 | SUM1          |
| YLR006C                                          | SSK1          | YBR171W                 | SEC66         |
| YEL060C                                          | PRB1          | YER040W                 | GLN3          |
| YNL127W                                          | FAR11         | YDR207C                 | UME6          |
| YDR383C                                          | NKP1          | YPR120C                 | CLB5          |

| Predictions at threshold level 0.75 continued... |               |                         |               |
|--------------------------------------------------|---------------|-------------------------|---------------|
| Gene1 of predicted pair                          |               | Gene2 of predicted pair |               |
| Systematic Name                                  | Standard Name | Systematic Name         | Standard Name |
| YBR228W                                          | SLX1          | YMR038C                 | CCS1          |
| YDL116W                                          | NUP84         | YPL125W                 | KAP120        |
| YPL253C                                          | VIK1          | YDR144C                 | MKC7          |
| YBL021C                                          | HAP3          | YIL008W                 | URM1          |
| YBR274W                                          | CHK1          | YDL002C                 | NHP10         |
| YPR036W                                          | VMA13         | YKR035W-A               | DID2          |
| YLR119W                                          | SRN2          | YBL103C                 | RTG3          |
| YIL076W                                          | SEC28         | YML001W                 | YPT7          |
| YPL042C                                          | SSN3          | YPL253C                 | VIK1          |
| YNL025C                                          | SSN8          | YOL051W                 | GAL11         |
| YGR249W                                          | MGA1          | YFL023W                 | BUD27         |
| YJR060W                                          | CBF1          | YDR310C                 | SUM1          |
| YLR386W                                          | VAC14         | YDR379W                 | RGA2          |
| YKR020W                                          | VPS51         | YOR035C                 | SHE4          |
| YBL008W                                          | HIR1          | YGL250W                 | RMR1          |
| YIL008W                                          | URM1          | YJL183W                 | MNN11         |
| YPL042C                                          | SSN3          | YGR108W                 | CLB1          |
| YAL024C                                          | LTE1          | YBR215W                 | HPC2          |
| YEL053C                                          | MAK10         | YER162C                 | RAD4          |
| YDL078C                                          | MDH3          | YPR119W                 | CLB2          |
| YNL236W                                          | SIN4          | YJL140W                 | RPB4          |
| YIL076W                                          | SEC28         | YLR371W                 | ROM2          |
| YDR108W                                          | GSG1          | YPL105C                 | YPL105C       |
| YPL253C                                          | VIK1          | YDR254W                 | CHL4          |
| YJL190C                                          | RPS22A        | YDR310C                 | SUM1          |
| YBR200W                                          | BEM1          | YPL106C                 | SSE1          |
| YJL172W                                          | CPS1          | YDR310C                 | SUM1          |
| YGL115W                                          | SNF4          | YJL095W                 | BCK1          |
| YBR030W                                          | YBR030W       | YPR036W                 | VMA13         |

| Predictions at threshold level 0.75 continued... |               |                         |               |
|--------------------------------------------------|---------------|-------------------------|---------------|
| Gene1 of predicted pair                          |               | Gene2 of predicted pair |               |
| Systematic Name                                  | Standard Name | Systematic Name         | Standard Name |
| YPR051W                                          | MAK3          | YKR001C                 | VPS1          |
| YGL078C                                          | DBP3          | YNL058C                 | YNL058C       |
| YOR312C                                          | RPL20B        | YLR370C                 | ARC18         |
| YNL199C                                          | GCR2          | YPR119W                 | CLB2          |
| YLR381W                                          | CTF3          | YLR452C                 | SST2          |
| YBR173C                                          | UMP1          | YER122C                 | GLO3          |
| YML115C                                          | VAN1          | YGR105W                 | VMA21         |
| YMR224C                                          | MRE11         | YLR180W                 | SAM1          |
| YBR195C                                          | MSI1          | YDR289C                 | RTT103        |
| YBL008W                                          | HIR1          | YBR010W                 | HHT1          |
| YLR119W                                          | SRN2          | YLR093C                 | NYV1          |
| YER096W                                          | SHC1          | YLR371W                 | ROM2          |
| YIR025W                                          | MND2          | YLR102C                 | APC9          |
| YMR319C                                          | FET4          | YKR093W                 | PTR2          |
| YOR227W                                          | YOR227W       | YPR119W                 | CLB2          |
| YGR020C                                          | VMA7          | YDL006W                 | PTC1          |
| YPL042C                                          | SSN3          | YDR440W                 | DOT1          |
| YDR378C                                          | LSM6          | YJL006C                 | CTK2          |
| YMR153W                                          | NUP53         | YJL095W                 | BCK1          |
| YOR080W                                          | DIA2          | YLR381W                 | CTF3          |
| YJL036W                                          | SNX4          | YDR202C                 | RAV2          |
| YNR072W                                          | HXT17         | YLR093C                 | NYV1          |
| YER162C                                          | RAD4          | YJR084W                 | CSN12         |
| YDR156W                                          | RPA14         | YDR254W                 | CHL4          |
| YCL010C                                          | SGF29         | YBR010W                 | HHT1          |
| YKL025C                                          | PAN3          | YJR135C                 | MCM22         |
| YMR054W                                          | STV1          | YPR032W                 | SRO7          |
| YMR179W                                          | SPT21         | YDR207C                 | UME6          |
| YPL152W                                          | RRD2          | YFR036W                 | CDC26         |



| Predictions at threshold level 0.75 continued... |               |                         |               |
|--------------------------------------------------|---------------|-------------------------|---------------|
| Gene1 of predicted pair                          |               | Gene2 of predicted pair |               |
| Systematic Name                                  | Standard Name | Systematic Name         | Standard Name |
| YPR131C                                          | NAT3          | YLR352W                 | YLR352W       |
| YCL001W                                          | RER1          | YPL227C                 | ALG5          |
| YDR225W                                          | HTA1          | YKR048C                 | NAP1          |
| YKL010C                                          | UFD4          | YDR363W-A               | SEM1          |
| YOL111C                                          | MDY2          | YLR093C                 | NYV1          |
| YLR288C                                          | MEC3          | YBR278W                 | DPB3          |
| YLR337C                                          | VRP1          | YEL053C                 | MAK10         |
| YBR200W                                          | BEM1          | YGR105W                 | VMA21         |
| YOR127W                                          | RGA1          | YHR158C                 | KEL1          |
| YBL058W                                          | SHP1          | YDR358W                 | GGA1          |
| YDR383C                                          | NKP1          | YLR079W                 | SIC1          |
| YPR017C                                          | DSS4          | YJR040W                 | GEF1          |
| YLR360W                                          | VPS38         | YDR310C                 | SUM1          |
| YNL076W                                          | MKS1          | YMR214W                 | SCJ1          |
| YGL151W                                          | NUT1          | YNL107W                 | YAF9          |
| YGL212W                                          | VAM7          | YEL053C                 | MAK10         |
| YGL025C                                          | PGD1          | YNL041C                 | COG6          |
| YPL042C                                          | SSN3          | YDR155C                 | CPR1          |
| YOR080W                                          | DIA2          | YPL106C                 | SSE1          |
| YNL333W                                          | SNZ2          | YAR014C                 | BUD14         |
| YMR224C                                          | MRE11         | YDR363W-A               | SEM1          |
| YOR195W                                          | SLK19         | YAR014C                 | BUD14         |
| YFR010W                                          | UBP6          | YPR046W                 | MCM16         |
| YOR069W                                          | VPS5          | YDL077C                 | VAM6          |
| YER059W                                          | PCL6          | YPR119W                 | CLB2          |
| YBR274W                                          | CHK1          | YDR310C                 | SUM1          |
| YBR041W                                          | FAT1          | YJL095W                 | BCK1          |
| YDL227C                                          | HO            | YPR119W                 | CLB2          |
| YKL139W                                          | CTK1          | YIL036W                 | CST6          |

| Predictions at threshold level 0.75 continued... |               |                         |               |
|--------------------------------------------------|---------------|-------------------------|---------------|
| Gene1 of predicted pair                          |               | Gene2 of predicted pair |               |
| Systematic Name                                  | Standard Name | Systematic Name         | Standard Name |
| YHR013C                                          | ARD1          | YML112W                 | CTK3          |
| YKL010C                                          | UFD4          | YKR020W                 | VPS51         |
| YGL087C                                          | MMS2          | YLR234W                 | TOP3          |
| YLR309C                                          | IMH1          | YNL107W                 | YAF9          |
| YKR099W                                          | BAS1          | YOL111C                 | MDY2          |
| YOL018C                                          | TLG2          | YKR030W                 | GMH1          |
| YGR020C                                          | VMA7          | YEL027W                 | CUP5          |
| YMR199W                                          | CLN1          | YKL068W                 | NUP100        |
| YDL116W                                          | NUP84         | YAR014C                 | BUD14         |
| YKL214C                                          | YRA2          | YNL139C                 | RLR1          |
| YFR010W                                          | UBP6          | YKL160W                 | ELF1          |
| YPL024W                                          | RMI1          | YPL079W                 | RPL21B        |
| YJL136C                                          | RPS21B        | YBL087C                 | RPL23A        |
| YOR332W                                          | VMA4          | YOR270C                 | VPH1          |
| YIL159W                                          | BNR1          | YPL137C                 | GIP3          |
| YMR116C                                          | ASC1          | YOR275C                 | RIM20         |
| YNL238W                                          | KEX2          | YER139C                 | YER139C       |
| YKL010C                                          | UFD4          | YPL248C                 | GAL4          |
| YKR020W                                          | VPS51         | YNL116W                 | DMA2          |
| YDR383C                                          | NKP1          | YGL252C                 | RTG2          |
| YDL185W                                          | TFP1          | YNL147W                 | LSM7          |
| YER087C-B                                        | SBH1          | YLR226W                 | BUR2          |
| YHR013C                                          | ARD1          | YOR312C                 | RPL20B        |
| YNL201C                                          | PSY2          | YDR183W                 | PLP1          |
| YLR360W                                          | VPS38         | YMR216C                 | SKY1          |
| YGL212W                                          | VAM7          | YPL137C                 | GIP3          |
| YLR090W                                          | XDJ1          | YKL139W                 | CTK1          |
| YJR099W                                          | YUH1          | YML097C                 | VPS9          |
| YOR358W                                          | HAP5          | YDR155C                 | CPR1          |

| Predictions at threshold level 0.75 continued... |               |                         |               |
|--------------------------------------------------|---------------|-------------------------|---------------|
| Gene1 of predicted pair                          |               | Gene2 of predicted pair |               |
| Systematic Name                                  | Standard Name | Systematic Name         | Standard Name |
| YBR171W                                          | SEC66         | YOL067C                 | RTG1          |
| YMR026C                                          | PEX12         | YLR180W                 | SAM1          |
| YAL024C                                          | LTE1          | YNL069C                 | RPL16B        |
| YJL095W                                          | BCK1          | YDL192W                 | ARF1          |
| YPL161C                                          | BEM4          | YNL107W                 | YAF9          |
| YOR132W                                          | VPS17         | YPL259C                 | APM1          |
| YGL180W                                          | ATG1          | YLR423C                 | ATG17         |
| YLR422W                                          | YLR422W       | YOL108C                 | INO4          |
| YBR173C                                          | UMP1          | YNL058C                 | YNL058C       |
| YJR063W                                          | RPA12         | YPL018W                 | CTF19         |
| YOR076C                                          | SKI7          | YPL079W                 | RPL21B        |
| YER054C                                          | GIP2          | YOL091W                 | SPO21         |
| YOR069W                                          | VPS5          | YNR032W                 | PPG1          |
| YDR318W                                          | MCM21         | YHL002W                 | HSE1          |
| YPL057C                                          | SUR1          | YBR171W                 | SEC66         |
| YDR129C                                          | SAC6          | YPL234C                 | TFP3          |
| YGL087C                                          | MMS2          | YML095C                 | RAD10         |
| YBR173C                                          | UMP1          | YLR093C                 | NYV1          |
| YCR063W                                          | BUD31         | YBR188C                 | NTC20         |
| YER116C                                          | SLX8          | YML028W                 | TSA1          |
| YER139C                                          | YER139C       | YAL002W                 | VPS8          |
| YMR284W                                          | YKU70         | YJL187C                 | SWE1          |
| YIL034C                                          | CAP2          | YHR134W                 | WSS1          |
| YFR010W                                          | UBP6          | YER044C                 | ERG28         |
| YMR054W                                          | STV1          | YDL077C                 | VAM6          |
| YJL060W                                          | BNA3          | YBR107C                 | IML3          |
| YER116C                                          | SLX8          | YGR188C                 | BUB1          |
| YGL033W                                          | HOP2          | YLR094C                 | GIS3          |
| YHR156C                                          | LIN1          | YMR142C                 | RPL13B        |

| Predictions at threshold level 0.75 continued... |               |                         |               |
|--------------------------------------------------|---------------|-------------------------|---------------|
| Gene1 of predicted pair                          |               | Gene2 of predicted pair |               |
| Systematic Name                                  | Standard Name | Systematic Name         | Standard Name |
| YLR337C                                          | VRP1          | YJL183W                 | MNN11         |
| YGR104C                                          | SRB5          | YCR084C                 | TUP1          |
| YIL034C                                          | CAP2          | YOR208W                 | PTP2          |
| YOR038C                                          | HIR2          | YDR073W                 | SNF11         |
| YNL291C                                          | MID1          | YML001W                 | YPT7          |
| YLR090W                                          | XDJ1          | YER162C                 | RAD4          |
| YGR108W                                          | CLB1          | YJR090C                 | GRR1          |
| YBL058W                                          | SHP1          | YNL041C                 | COG6          |
| YLR337C                                          | VRP1          | YOL081W                 | IRA2          |
| YGL212W                                          | VAM7          | YBR036C                 | CSG2          |
| YML115C                                          | VAN1          | YNL199C                 | GCR2          |
| YDR507C                                          | GIN4          | YOR275C                 | RIM20         |
| YEL013W                                          | VAC8          | YOR124C                 | UBP2          |
| YGR072W                                          | UPF3          | YLR309C                 | IMH1          |
| YMR109W                                          | MYO5          | YOL067C                 | RTG1          |
| YKL079W                                          | SMY1          | YEL022W                 | GEA2          |
| YDR443C                                          | SSN2          | YHR012W                 | VPS29         |
| YOL126C                                          | MDH2          | YKR024C                 | DBP7          |
| YDR363W-A                                        | SEM1          | YLR398C                 | SKI2          |
| YBR200W                                          | BEM1          | YLR398C                 | SKI2          |
| YBL102W                                          | SFT2          | YDL077C                 | VAM6          |
| YIL053W                                          | RHR2          | YNL058C                 | YNL058C       |
| YCR086W                                          | CSM1          | YJL183W                 | MNN11         |
| YKL048C                                          | ELM1          | YKR020W                 | VPS51         |
| YHR111W                                          | UBA4          | YGL163C                 | RAD54         |
| YLR362W                                          | STE11         | YER118C                 | SHO1          |
| YGL153W                                          | PEX14         | YAL055W                 | PEX22         |
| YGR054W                                          | YGR054W       | YAL002W                 | VPS8          |
| YMR095C                                          | SNO1          | YPL057C                 | SUR1          |

| Predictions at threshold level 0.75 continued... |               |                         |               |
|--------------------------------------------------|---------------|-------------------------|---------------|
| Gene1 of predicted pair                          |               | Gene2 of predicted pair |               |
| Systematic Name                                  | Standard Name | Systematic Name         | Standard Name |
| YBR084C-A                                        | RPL19A        | YOR275C                 | RIM20         |
| YDL083C                                          | RPS16B        | YOL121C                 | RPS19A        |
| YLR090W                                          | XDJ1          | YHR200W                 | RPN10         |
| YDR137W                                          | RGP1          | YDR363W-A               | SEM1          |
| YGL066W                                          | SGF73         | YLR381W                 | CTF3          |
| YLR360W                                          | VPS38         | YBR082C                 | UBC4          |
| YPR084W                                          | YPR084W       | YGL054C                 | ERV14         |
| YJR060W                                          | CBF1          | YPL195W                 | APL5          |
| YJR024C                                          | MDE1          | YIL156W                 | UBP7          |
| YGL063W                                          | PUS2          | YPL240C                 | HSP82         |
| YDR335W                                          | MSN5          | YDL047W                 | SIT4          |
| YOR069W                                          | VPS5          | YCL001W                 | RER1          |
| YGL212W                                          | VAM7          | YER122C                 | GLO3          |
| YCR034W                                          | FEN1          | YLR234W                 | TOP3          |
| YMR153W                                          | NUP53         | YPR030W                 | CSR2          |
| YOR140W                                          | SFL1          | YPL253C                 | VIK1          |
| YMR016C                                          | SOK2          | YHR200W                 | RPN10         |
| YDR293C                                          | SSD1          | YPL253C                 | VIK1          |
| YPR051W                                          | MAK3          | YNR032W                 | PPG1          |
| YOR033C                                          | EXO1          | YNL307C                 | MCK1          |
| YDR443C                                          | SSN2          | YOR035C                 | SHE4          |
| YLR234W                                          | TOP3          | YPL256C                 | CLN2          |
| YMR224C                                          | MRE11         | YGL025C                 | PGD1          |
| YJR021C                                          | REC107        | YKL074C                 | MUD2          |
| YOR337W                                          | TEA1          | YLR452C                 | SST2          |
| YFR010W                                          | UBP6          | YGR249W                 | MGA1          |
| YOR043W                                          | WHI2          | YPL137C                 | GIP3          |
| YNL215W                                          | IES2          | YNL248C                 | RPA49         |
| YDR137W                                          | RGP1          | YLR350W                 | ORM2          |

| Predictions at threshold level 0.75 continued... |               |                         |               |
|--------------------------------------------------|---------------|-------------------------|---------------|
| Gene1 of predicted pair                          |               | Gene2 of predicted pair |               |
| Systematic Name                                  | Standard Name | Systematic Name         | Standard Name |
| YGR105W                                          | VMA21         | YAR014C                 | BUD14         |
| YCL014W                                          | BUD3          | YLR219W                 | MSC3          |
| YML001W                                          | YPT7          | YGL124C                 | MON1          |
| YNL206C                                          | RTT106        | YDR207C                 | UME6          |
| YCR086W                                          | CSM1          | YML112W                 | CTK3          |
| YIR005W                                          | IST3          | YOL054W                 | PSH1          |
| YNL058C                                          | YNL058C       | YBR280C                 | SAF1          |
| YNL307C                                          | MCK1          | YHR115C                 | DMA1          |
| YLR191W                                          | PEX13         | YGR077C                 | PEX8          |
| YDR260C                                          | SWM1          | YFR036W                 | CDC26         |
| YKL010C                                          | UFD4          | YLR337C                 | VRP1          |
| YLR337C                                          | VRP1          | YDR207C                 | UME6          |
| YFL023W                                          | BUD27         | YJL183W                 | MNN11         |
| YIL033C                                          | BCY1          | YBL106C                 | SRO77         |
| YGL087C                                          | MMS2          | YHR114W                 | BZZ1          |
| YPL024W                                          | RMI1          | YOR327C                 | SNC2          |
| YNL206C                                          | RTT106        | YPR036W                 | VMA13         |
| YLR079W                                          | SIC1          | YNL225C                 | CNM67         |
| YIL053W                                          | RHR2          | YNL076W                 | MKS1          |
| YML115C                                          | VAN1          | YOR106W                 | VAM3          |
| YOR066W                                          | MSA1          | YOR035C                 | SHE4          |
| YPR040W                                          | TIP41         | YNL116W                 | DMA2          |
| YOR367W                                          | SCP1          | YDL226C                 | GCS1          |
| YOR358W                                          | HAP5          | YGR270W                 | YTA7          |
| YLR234W                                          | TOP3          | YLR410W                 | VIP1          |
| YER144C                                          | UBP5          | YER122C                 | GLO3          |
| YLR234W                                          | TOP3          | YBL051C                 | PIN4          |
| YDR004W                                          | RAD57         | YBR073W                 | RDH54         |
| YBR217W                                          | ATG12         | YMR311C                 | GLC8          |

| Predictions at threshold level 0.75 continued... |               |                         |               |
|--------------------------------------------------|---------------|-------------------------|---------------|
| Gene1 of predicted pair                          |               | Gene2 of predicted pair |               |
| Systematic Name                                  | Standard Name | Systematic Name         | Standard Name |
| YLR360W                                          | VPS38         | YPR032W                 | SRO7          |
| YIL159W                                          | BNR1          | YKL116C                 | PRR1          |
| YJL172W                                          | CPS1          | YLR398C                 | SKI2          |
| YEL053C                                          | MAK10         | YPR032W                 | SRO7          |
| YKR020W                                          | VPS51         | YNL041C                 | COG6          |
| YBR171W                                          | SEC66         | YGR152C                 | RSR1          |
| YKL007W                                          | CAP1          | YNL135C                 | FPR1          |
| YMR016C                                          | SOK2          | YER044C                 | ERG28         |
| YMR172W                                          | HOT1          | YGL151W                 | NUT1          |
| YER110C                                          | KAP123        | YEL053C                 | MAK10         |
| YNL236W                                          | SIN4          | YOL091W                 | SPO21         |
| YLR371W                                          | ROM2          | YNL090W                 | RHO2          |
| YJR059W                                          | PTK2          | YBL079W                 | NUP170        |
| YDL116W                                          | NUP84         | YBL008W                 | HIR1          |
| YML071C                                          | COG8          | YBR280C                 | SAF1          |
| YDR155C                                          | CPR1          | YBR114W                 | RAD16         |
| YER139C                                          | YER139C       | YJL183W                 | MNN11         |
| YHR200W                                          | RPN10         | YOL054W                 | PSH1          |
| YMR016C                                          | SOK2          | YFL023W                 | BUD27         |
| YGL223C                                          | COG1          | YPL195W                 | APL5          |
| YKL025C                                          | PAN3          | YDR293C                 | SSD1          |
| YGL078C                                          | DBP3          | YPR036W                 | VMA13         |
| YOR132W                                          | VPS17         | YDR183W                 | PLP1          |
| YMR199W                                          | CLN1          | YOR140W                 | SFL1          |
| YML007W                                          | YAP1          | YNL031C                 | HHT2          |
| YHR079C                                          | IRE1          | YER089C                 | PTC2          |
| YDR363W-A                                        | SEM1          | YPL248C                 | GAL4          |
| YKL126W                                          | YPK1          | YOR035C                 | SHE4          |
| YAL024C                                          | LTE1          | YOR337W                 | TEA1          |

| Predictions at threshold level 0.75 continued... |               |                         |               |
|--------------------------------------------------|---------------|-------------------------|---------------|
| Gene1 of predicted pair                          |               | Gene2 of predicted pair |               |
| Systematic Name                                  | Standard Name | Systematic Name         | Standard Name |
| YDR080W                                          | VPS41         | YDR207C                 | UME6          |
| YKL116C                                          | PRR1          | YDR261C                 | EXG2          |
| YGL147C                                          | RPL9A         | YNR072W                 | HXT17         |
| YPR089W                                          | YPR089W       | YDL155W                 | CLB3          |
| YER116C                                          | SLX8          | YER144C                 | UBP5          |
| YNL051W                                          | COG5          | YJR033C                 | RAV1          |
| YCR053W                                          | THR4          | YOR036W                 | PEP12         |
| YDL083C                                          | RPS16B        | YMR230W                 | RPS10B        |
| YDR225W                                          | HTA1          | YBR057C                 | MUM2          |
| YMR153W                                          | NUP53         | YMR311C                 | GLC8          |
| YDL184C                                          | RPL41A        | YBL025W                 | RRN10         |
| YMR224C                                          | MRE11         | YDR378C                 | LSM6          |
| YIL008W                                          | URM1          | YDR310C                 | SUM1          |
| YBR107C                                          | IML3          | YDR076W                 | RAD55         |
| YGR270W                                          | YTA7          | YOL081W                 | IRA2          |
| YLR144C                                          | ACF2          | YHR016C                 | YSC84         |
| YEL050C                                          | RML2          | YLR410W                 | VIP1          |
| YKR093W                                          | PTR2          | YFL044C                 | OTU1          |
| YGL054C                                          | ERV14         | YNL127W                 | FAR11         |
| YPR171W                                          | BSP1          | YNL094W                 | APP1          |
| YHR150W                                          | PEX28         | YLR324W                 | PEX30         |
| YPL042C                                          | SSN3          | YOR195W                 | SLK19         |
| YOR112W                                          | CEX1          | YDL077C                 | VAM6          |
| YDR004W                                          | RAD57         | YDR076W                 | RAD55         |
| YPL042C                                          | SSN3          | YHR167W                 | THP2          |
| YDR156W                                          | RPA14         | YKR061W                 | KTR2          |
| YER115C                                          | SPR6          | YPL256C                 | CLN2          |
| YAL020C                                          | ATS1          | YOR327C                 | SNC2          |
| YDR378C                                          | LSM6          | YPL161C                 | BEM4          |



| Predictions at threshold level 0.75 continued... |               |                         |               |
|--------------------------------------------------|---------------|-------------------------|---------------|
| Gene1 of predicted pair                          |               | Gene2 of predicted pair |               |
| Systematic Name                                  | Standard Name | Systematic Name         | Standard Name |
| YMR224C                                          | MRE11         | YPL152W                 | RRD2          |
| YER087C-B                                        | SBH1          | YGL198W                 | YIP4          |
| YLR061W                                          | RPL22A        | YAL002W                 | VPS8          |
| YKL025C                                          | PAN3          | YHR012W                 | VPS29         |
| YMR142C                                          | RPL13B        | YNL307C                 | MCK1          |
| YEL056W                                          | HAT2          | YLR233C                 | EST1          |
| YDL192W                                          | ARF1          | YEL036C                 | ANP1          |
| YOR275C                                          | RIM20         | YKL101W                 | HSL1          |
| YOL051W                                          | GAL11         | YPR072W                 | NOT5          |
| YPL050C                                          | MNN9          | YBL072C                 | RPS8A         |
| YIL053W                                          | RHR2          | YCR053W                 | THR4          |
| YER116C                                          | SLX8          | YDR137W                 | RGP1          |
| YKL117W                                          | SBA1          | YOR358W                 | HAP5          |
| YDR129C                                          | SAC6          | YMR109W                 | MYO5          |
| YOL126C                                          | MDH2          | YPL246C                 | RBD2          |
| YJR140C                                          | HIR3          | YHR077C                 | NMD2          |
| YOR043W                                          | WHI2          | YPL195W                 | APL5          |
| YBL103C                                          | RTG3          | YHR012W                 | VPS29         |
| YKL213C                                          | DOA1          | YHR167W                 | THP2          |
| YJR090C                                          | GRR1          | YDR310C                 | SUM1          |
| YLR456W                                          | YLR456W       | YKR084C                 | HBS1          |
| YLR102C                                          | APC9          | YHR152W                 | SPO12         |
| YNL094W                                          | APP1          | YHR016C                 | YSC84         |
| YJR040W                                          | GEF1          | YJL004C                 | SYS1          |
| YGR108W                                          | CLB1          | YLR381W                 | CTF3          |
| YPL115C                                          | BEM3          | YHR134W                 | WSS1          |
| YGR217W                                          | CCH1          | YBR200W                 | BEM1          |
| YHR013C                                          | ARD1          | YOR141C                 | ARP8          |
| YNL325C                                          | FIG4          | YNL087W                 | TCB2          |

| Predictions at threshold level 0.75 continued... |               |                         |               |
|--------------------------------------------------|---------------|-------------------------|---------------|
| Gene1 of predicted pair                          |               | Gene2 of predicted pair |               |
| Systematic Name                                  | Standard Name | Systematic Name         | Standard Name |
| YFL023W                                          | BUD27         | YJR032W                 | CPR7          |
| YDR484W                                          | VPS52         | YMR214W                 | SCJ1          |
| YMR199W                                          | CLN1          | YNL116W                 | DMA2          |
| YGL115W                                          | SNF4          | YOL081W                 | IRA2          |
| YLR192C                                          | HCR1          | YFR036W                 | CDC26         |
| YBR278W                                          | DPB3          | YMR055C                 | BUB2          |
| YLL039C                                          | UBI4          | YDR245W                 | MNN10         |
| YPL253C                                          | VIK1          | YGR188C                 | BUB1          |
| YOR038C                                          | HIR2          | YMR038C                 | CCS1          |
| YMR198W                                          | CIK1          | YJR060W                 | CBF1          |
| YPR017C                                          | DSS4          | YPL105C                 | YPL105C       |
| YMR198W                                          | CIK1          | YDL006W                 | PTC1          |
| YOR337W                                          | TEA1          | YHR156C                 | LIN1          |
| YLR399C                                          | BDF1          | YOR038C                 | HIR2          |
| YIR009W                                          | MSL1          | YPL178W                 | CBC2          |
| YOR275C                                          | RIM20         | YGR135W                 | PRE9          |
| YBR217W                                          | ATG12         | YML115C                 | VAN1          |
| YFL033C                                          | RIM15         | YJL004C                 | SYS1          |
| YKL032C                                          | IXR1          | YGR135W                 | PRE9          |
| YML095C                                          | RAD10         | YJR035W                 | RAD26         |
| YOL121C                                          | RPS19A        | YNL076W                 | MKS1          |
| YGR020C                                          | VMA7          | YKL119C                 | VPH2          |
| YDR443C                                          | SSN2          | YLR370C                 | ARC18         |
| YDR254W                                          | CHL4          | YDR171W                 | HSP42         |
| YBR200W                                          | BEM1          | YHR061C                 | GIC1          |
| YGR249W                                          | MGA1          | YHR081W                 | LRP1          |
| YLR399C                                          | BDF1          | YJR063W                 | RPA12         |
| YCL001W                                          | RER1          | YNR032W                 | PPG1          |
| YDR108W                                          | GSG1          | YPL234C                 | TFP3          |

| Predictions at threshold level 0.75 continued... |               |                         |               |
|--------------------------------------------------|---------------|-------------------------|---------------|
| Gene1 of predicted pair                          |               | Gene2 of predicted pair |               |
| Systematic Name                                  | Standard Name | Systematic Name         | Standard Name |
| YOR270C                                          | VPH1          | YLR370C                 | ARC18         |
| YDL020C                                          | RPN4          | YHL030W                 | ECM29         |
| YBR131W                                          | CCZ1          | YNL238W                 | KEX2          |
| YDR323C                                          | PEP7          | YPR119W                 | CLB2          |
| YBR195C                                          | MSI1          | YOR368W                 | RAD17         |
| YJL078C                                          | PRY3          | YKR093W                 | PTR2          |
| YBR111W-A                                        | SUS1          | YOL012C                 | HTZ1          |
| YLR018C                                          | POM34         | YMR164C                 | MSS11         |
| YJR060W                                          | CBF1          | YML112W                 | CTK3          |
| YDR080W                                          | VPS41         | YOR327C                 | SNC2          |
| YGL033W                                          | HOP2          | YPL137C                 | GIP3          |
| YMR026C                                          | PEX12         | YOL111C                 | MDY2          |
| YFL047W                                          | RGD2          | YKR024C                 | DBP7          |
| YLR381W                                          | CTF3          | YLR429W                 | CRN1          |
| YPL057C                                          | SUR1          | YLR320W                 | MMS22         |
| YER087C-B                                        | SBH1          | YLR113W                 | HOG1          |
| YNL032W                                          | SIW14         | YKR035W-A               | DID2          |
| YER162C                                          | RAD4          | YEL060C                 | PRB1          |
| YKR014C                                          | YPT52         | YGL198W                 | YIP4          |
| YMR198W                                          | CIK1          | YOR368W                 | RAD17         |
| YKR099W                                          | BAS1          | YMR133W                 | REC114        |
| YBR260C                                          | RGD1          | YER049W                 | TPA1          |
| YMR016C                                          | SOK2          | YLR398C                 | SKI2          |
| YFR010W                                          | UBP6          | YDL155W                 | CLB3          |
| YOR106W                                          | VAM3          | YJR125C                 | ENT3          |
| YBR131W                                          | CCZ1          | YDL006W                 | PTC1          |
| YGL115W                                          | SNF4          | YPR032W                 | SRO7          |
| YMR224C                                          | MRE11         | YLR254C                 | NDL1          |
| YNR072W                                          | HXT17         | YOR327C                 | SNC2          |

| Predictions at threshold level 0.75 continued... |               |                         |               |
|--------------------------------------------------|---------------|-------------------------|---------------|
| Gene1 of predicted pair                          |               | Gene2 of predicted pair |               |
| Systematic Name                                  | Standard Name | Systematic Name         | Standard Name |
| YIL076W                                          | SEC28         | YBR215W                 | HPC2          |
| YGR019W                                          | UGA1          | YBR200W                 | BEM1          |
| YKL135C                                          | APL2          | YPL259C                 | APM1          |
| YKL135C                                          | APL2          | YJR125C                 | ENT3          |
| YBR041W                                          | FAT1          | YOR275C                 | RIM20         |
| YDR004W                                          | RAD57         | YLR150W                 | STM1          |
| YLR102C                                          | APC9          | YDR507C                 | GIN4          |
| YGR249W                                          | MGA1          | YKL048C                 | ELM1          |
| YGL147C                                          | RPL9A         | YOR043W                 | WHI2          |
| YEL003W                                          | GIM4          | YHR056C                 | RSC30         |
| YDL223C                                          | HBT1          | YOR327C                 | SNC2          |
| YPL213W                                          | LEA1          | YDR440W                 | DOT1          |
| YJR060W                                          | CBF1          | YPL106C                 | SSE1          |
| YLR090W                                          | XDJ1          | YNL058C                 | YNL058C       |
| YDR004W                                          | RAD57         | YNL215W                 | IES2          |
| YAL024C                                          | LTE1          | YBR057C                 | MUM2          |
| YIL103W                                          | DPH1          | YNL225C                 | CNM67         |
| YGR261C                                          | APL6          | YNR032W                 | PPG1          |
| YNR072W                                          | HXT17         | YMR230W                 | RPS10B        |
| YGL190C                                          | CDC55         | YHR191C                 | CTF8          |
| YNL069C                                          | RPL16B        | YDR108W                 | GSG1          |
| YDR289C                                          | RTT103        | YOR124C                 | UBP2          |
| YLR043C                                          | TRX1          | YLR309C                 | IMH1          |
| YHR156C                                          | LIN1          | YOR066W                 | MSA1          |
| YMR164C                                          | MSS11         | YMR125W                 | STO1          |
| YJL176C                                          | SWI3          | YLR018C                 | POM34         |
| YLR090W                                          | XDJ1          | YDR484W                 | VPS52         |
| YDR335W                                          | MSN5          | YJR063W                 | RPA12         |
| YDR363W-A                                        | SEM1          | YER122C                 | GLO3          |

| Predictions at threshold level 0.75 continued... |               |                         |               |
|--------------------------------------------------|---------------|-------------------------|---------------|
| Gene1 of predicted pair                          |               | Gene2 of predicted pair |               |
| Systematic Name                                  | Standard Name | Systematic Name         | Standard Name |
| YJL172W                                          | CPS1          | YNL238W                 | KEX2          |
| YKR059W                                          | TIF1          | YLR288C                 | MEC3          |
| YMR224C                                          | MRE11         | YBL101C                 | ECM21         |
| YMR095C                                          | SNO1          | YPR046W                 | MCM16         |
| YLR337C                                          | VRP1          | YPL161C                 | BEM4          |
| YBR108W                                          | YBR108W       | YAR014C                 | BUD14         |
| YBL102W                                          | SFT2          | YPL161C                 | BEM4          |
| YGL212W                                          | VAM7          | YOR327C                 | SNC2          |
| YPR046W                                          | MCM16         | YHR115C                 | DMA1          |
| YLR079W                                          | SIC1          | YGR188C                 | BUB1          |
| YBL079W                                          | NUP170        | YOL090W                 | MSH2          |
| YOR195W                                          | SLK19         | YBL031W                 | SHE1          |
| YOR140W                                          | SFL1          | YBR260C                 | RGD1          |
| YML038C                                          | YMD8          | YDL006W                 | PTC1          |
| YNR072W                                          | HXT17         | YBR036C                 | CSG2          |
| YDR448W                                          | ADA2          | YLR357W                 | RSC2          |
| YOR127W                                          | RGA1          | YPL120W                 | VPS30         |
| YIL076W                                          | SEC28         | YBR280C                 | SAF1          |
| YGL212W                                          | VAM7          | YOR312C                 | RPL20B        |
| YER044C                                          | ERG28         | YLR452C                 | SST2          |
| YLR288C                                          | MEC3          | YGL151W                 | NUT1          |
| YKL032C                                          | IXR1          | YBL087C                 | RPL23A        |
| YGL087C                                          | MMS2          | YLR079W                 | SIC1          |
| YNL325C                                          | FIG4          | YNL058C                 | YNL058C       |
| YJR063W                                          | RPA12         | YOL054W                 | PSH1          |
| YKL160W                                          | ELF1          | YGL019W                 | CKB1          |
| YDL155W                                          | CLB3          | YDR310C                 | SUM1          |
| YLR234W                                          | TOP3          | YKL101W                 | HSL1          |
| YMR164C                                          | MSS11         | YKR024C                 | DBP7          |

| Predictions at threshold level 0.75 continued... |               |                         |               |
|--------------------------------------------------|---------------|-------------------------|---------------|
| Gene1 of predicted pair                          |               | Gene2 of predicted pair |               |
| Systematic Name                                  | Standard Name | Systematic Name         | Standard Name |
| YBR030W                                          | YBR030W       | YBL025W                 | RRN10         |
| YPL137C                                          | GIP3          | YOR035C                 | SHE4          |
| YIL103W                                          | DPH1          | YOL054W                 | PSH1          |
| YOL145C                                          | CTR9          | YNL297C                 | MON2          |
| YDR293C                                          | SSD1          | YKR048C                 | NAP1          |
| YKL110C                                          | KTI12         | YOL018C                 | TLG2          |
| YHR200W                                          | RPN10         | YNL076W                 | MKS1          |
| YDR004W                                          | RAD57         | YNL082W                 | PMS1          |
| YOR080W                                          | DIA2          | YOR001W                 | RRP6          |
| YGR104C                                          | SRB5          | YDR207C                 | UME6          |
| YML001W                                          | YPT7          | YOL081W                 | IRA2          |
| YER161C                                          | SPT2          | YOR368W                 | RAD17         |
| YER116C                                          | SLX8          | YOR270C                 | VPH1          |
| YGL163C                                          | RAD54         | YBL087C                 | RPL23A        |
| YOR132W                                          | VPS17         | YDR108W                 | GSG1          |
| YMR224C                                          | MRE11         | YHR081W                 | LRP1          |
| YNL215W                                          | IES2          | YGR188C                 | BUB1          |
| YJL183W                                          | MNN11         | YBR280C                 | SAF1          |
| YGL223C                                          | COG1          | YPL037C                 | EGD1          |
| YDL059C                                          | RAD59         | YDR310C                 | SUM1          |
| YKL139W                                          | CTK1          | YOR066W                 | MSA1          |
| YDR293C                                          | SSD1          | YNL069C                 | RPL16B        |
| YLR381W                                          | CTF3          | YDR335W                 | MSN5          |
| YBR228W                                          | SLX1          | YOR243C                 | PUS7          |
| YML115C                                          | VAN1          | YDL083C                 | RPS16B        |
| YMR039C                                          | SUB1          | YBR278W                 | DPB3          |
| YHR098C                                          | SFB3          | YOL006C                 | TOP1          |
| YMR142C                                          | RPL13B        | YOR043W                 | WHI2          |
| YFR031C-A                                        | RPL2A         | YER122C                 | GLO3          |

| Predictions at threshold level 0.75 continued... |               |                         |               |
|--------------------------------------------------|---------------|-------------------------|---------------|
| Gene1 of predicted pair                          |               | Gene2 of predicted pair |               |
| Systematic Name                                  | Standard Name | Systematic Name         | Standard Name |
| YOL054W                                          | PSH1          | YHR115C                 | DMA1          |
| YBR131W                                          | CCZ1          | YDR080W                 | VPS41         |
| YDL042C                                          | SIR2          | YNL031C                 | HHT2          |
| YMR016C                                          | SOK2          | YPR036W                 | VMA13         |
| YPL152W                                          | RRD2          | YAR014C                 | BUD14         |
| YNR052C                                          | POP2          | YHR111W                 | UBA4          |
| YOR083W                                          | WHI5          | YLR079W                 | SIC1          |
| YLL039C                                          | UBI4          | YGL212W                 | VAM7          |
| YBR108W                                          | YBR108W       | YOR290C                 | SNF2          |
| YPL253C                                          | VIK1          | YLR429W                 | CRN1          |
| YDR320C                                          | SWA2          | YER120W                 | SCS2          |
| YOR001W                                          | RRP6          | YER122C                 | GLO3          |
| YNL215W                                          | IES2          | YLR386W                 | VAC14         |
| YMR172W                                          | HOT1          | YLR381W                 | CTF3          |
| YLR370C                                          | ARC18         | YNL076W                 | MKS1          |
| YER143W                                          | DDI1          | YGL095C                 | VPS45         |
| YCR066W                                          | RAD18         | YJR033C                 | RAV1          |
| YGR072W                                          | UPF3          | YDR207C                 | UME6          |
| YGL174W                                          | BUD13         | YDR335W                 | MSN5          |
| YBR108W                                          | YBR108W       | YJL172W                 | CPS1          |
| YBL102W                                          | SFT2          | YPR032W                 | SRO7          |
| YOR212W                                          | STE4          | YIL007C                 | NAS2          |
| YHR052W                                          | CIC1          | YJL189W                 | RPL39         |
| YDL077C                                          | VAM6          | YBR280C                 | SAF1          |
| YDL002C                                          | NHP10         | YBR195C                 | MSI1          |
| YMR199W                                          | CLN1          | YBL079W                 | NUP170        |
| YAL024C                                          | LTE1          | YOR141C                 | ARP8          |
| YHR039C-A                                        | VMA10         | YOL121C                 | RPS19A        |
| YLR452C                                          | SST2          | YPL195W                 | APL5          |

| Predictions at threshold level 0.75 continued... |               |                         |               |
|--------------------------------------------------|---------------|-------------------------|---------------|
| Gene1 of predicted pair                          |               | Gene2 of predicted pair |               |
| Systematic Name                                  | Standard Name | Systematic Name         | Standard Name |
| YPL253C                                          | VIK1          | YDR183W                 | PLP1          |
| YJR032W                                          | CPR7          | YHL002W                 | HSE1          |
| YDL052C                                          | SLC1          | YKL140W                 | TGL1          |
| YHL031C                                          | GOS1          | YPR051W                 | MAK3          |
| YJL029C                                          | VPS53         | YOL018C                 | TLG2          |
| YKL116C                                          | PRR1          | YDL192W                 | ARF1          |
| YLR102C                                          | APC9          | YJL136C                 | RPS21B        |
| YNL206C                                          | RTT106        | YHR152W                 | SPO12         |
| YNL054W                                          | VAC7          | YHR013C                 | ARD1          |
| YPL037C                                          | EGD1          | YAL002W                 | VPS8          |
| YBL008W                                          | HIR1          | YHR178W                 | STB5          |
| YBR128C                                          | ATG14         | YPR119W                 | CLB2          |
| YMR116C                                          | ASC1          | YOL081W                 | IRA2          |
| YBR030W                                          | YBR030W       | YBR108W                 | YBR108W       |
| YDR156W                                          | RPA14         | YJL117W                 | PHO86         |
| YOL090W                                          | MSH2          | YBR082C                 | UBC4          |
| YGL161C                                          | YIP5          | YER139C                 | YER139C       |
| YIL002C                                          | INP51         | YGL124C                 | MON1          |
| YBR200W                                          | BEM1          | YPR046W                 | MCM16         |
| YOR195W                                          | SLK19         | YDR318W                 | MCM21         |
| YGL147C                                          | RPL9A         | YBL025W                 | RRN10         |
| YIL076W                                          | SEC28         | YPR036W                 | VMA13         |
| YDR254W                                          | CHL4          | YCR086W                 | CSM1          |
| YBR260C                                          | RGD1          | YMR311C                 | GLC8          |
| YDR225W                                          | HTA1          | YDR440W                 | DOT1          |
| YDL020C                                          | RPN4          | YFR036W                 | CDC26         |
| YMR202W                                          | ERG2          | YJL058C                 | BIT61         |
| YER032W                                          | FIR1          | YOR363C                 | PIP2          |
| YHR111W                                          | UBA4          | YOL054W                 | PSH1          |



| Predictions at threshold level 0.75 continued... |               |                         |               |
|--------------------------------------------------|---------------|-------------------------|---------------|
| Gene1 of predicted pair                          |               | Gene2 of predicted pair |               |
| Systematic Name                                  | Standard Name | Systematic Name         | Standard Name |
| YKR059W                                          | TIF1          | YLR350W                 | ORM2          |
| YDR289C                                          | RTT103        | YER122C                 | GLO3          |
| YMR026C                                          | PEX12         | YBR019C                 | GAL10         |
| YER110C                                          | KAP123        | YBR010W                 | HHT1          |
| YFR036W                                          | CDC26         | YCR053W                 | THR4          |
| YDL020C                                          | RPN4          | YHR167W                 | THP2          |
| YOR083W                                          | WHI5          | YOR080W                 | DIA2          |
| YER116C                                          | SLX8          | YMR016C                 | SOK2          |
| YNL025C                                          | SSN8          | YOR124C                 | UBP2          |
| YIL053W                                          | RHR2          | YLR192C                 | HCR1          |
| YLL007C                                          | YLL007C       | YPL018W                 | CTF19         |
| YPL112C                                          | PEX25         | YDL240W                 | LRG1          |
| YBR200W                                          | BEM1          | YBL047C                 | EDE1          |
| YER044C                                          | ERG28         | YLR370C                 | ARC18         |
| YLR192C                                          | HCR1          | YBL025W                 | RRN10         |
| YDR320C                                          | SWA2          | YHR012W                 | VPS29         |
| YJR060W                                          | CBF1          | YDR200C                 | VPS64         |
| YBR278W                                          | DPB3          | YGL151W                 | NUT1          |
| YIL159W                                          | BNR1          | YER044C                 | ERG28         |
| YMR116C                                          | ASC1          | YHR200W                 | RPN10         |
| YMR055C                                          | BUB2          | YLR435W                 | TSR2          |
| YPL096C-A                                        | ERI1          | YNL079C                 | TPM1          |
| YMR026C                                          | PEX12         | YNL076W                 | MKS1          |
| YML001W                                          | YPT7          | YPR032W                 | SRO7          |
| YBR200W                                          | BEM1          | YIL103W                 | DPH1          |
| YCR084C                                          | TUP1          | YPL248C                 | GAL4          |
| YLR090W                                          | XDJ1          | YDL083C                 | RPS16B        |
| YPR036W                                          | VMA13         | YLR398C                 | SKI2          |
| YCR066W                                          | RAD18         | YFL033C                 | RIM15         |

| Predictions at threshold level 0.75 continued... |               |                         |               |
|--------------------------------------------------|---------------|-------------------------|---------------|
| Gene1 of predicted pair                          |               | Gene2 of predicted pair |               |
| Systematic Name                                  | Standard Name | Systematic Name         | Standard Name |
| YCR066W                                          | RAD18         | YER120W                 | SCS2          |
| YKL135C                                          | APL2          | YPR119W                 | CLB2          |
| YER116C                                          | SLX8          | YFR036W                 | CDC26         |
| YEL053C                                          | MAK10         | YER139C                 | YER139C       |
| YDR335W                                          | MSN5          | YGR188C                 | BUB1          |
| YMR198W                                          | CIK1          | YKL101W                 | HSL1          |
| YKR072C                                          | SIS2          | YCR086W                 | CSM1          |
| YDR004W                                          | RAD57         | YGL148W                 | ARO2          |
| YLL007C                                          | YLL007C       | YGL151W                 | NUT1          |
| YMR026C                                          | PEX12         | YHR081W                 | LRP1          |
| YHR111W                                          | UBA4          | YGL031C                 | RPL24A        |
| YNL243W                                          | SLA2          | YHR181W                 | SVP26         |
| YIL034C                                          | CAP2          | YGR188C                 | BUB1          |
| YMR091C                                          | NPL6          | YJR032W                 | CPR7          |
| YNL297C                                          | MON2          | YHR060W                 | VMA22         |
| YOR106W                                          | VAM3          | YGL003C                 | CDH1          |
| YOR033C                                          | EXO1          | YHR010W                 | RPL27A        |
| YNL218W                                          | MGS1          | YDL013W                 | SLX5          |
| YLR429W                                          | CRN1          | YJR060W                 | CBF1          |
| YLR381W                                          | CTF3          | YKL114C                 | APN1          |
| YLL007C                                          | YLL007C       | YOR132W                 | VPS17         |
| YJL058C                                          | BIT61         | YLR370C                 | ARC18         |
| YKL101W                                          | HSL1          | YOR368W                 | RAD17         |
| YOL148C                                          | SPT20         | YGL252C                 | RTG2          |
| YGL223C                                          | COG1          | YGR105W                 | VMA21         |
| YKR001C                                          | VPS1          | YKL119C                 | VPH2          |
| YBR217W                                          | ATG12         | YER040W                 | GLN3          |
| YLR396C                                          | VPS33         | YDL077C                 | VAM6          |
| YPL047W                                          | SGF11         | YBR111W-A               | SUS1          |

| Predictions at threshold level 0.75 continued... |               |                         |               |
|--------------------------------------------------|---------------|-------------------------|---------------|
| Gene1 of predicted pair                          |               | Gene2 of predicted pair |               |
| Systematic Name                                  | Standard Name | Systematic Name         | Standard Name |
| YCR020C-A                                        | MAK31         | YFL033C                 | RIM15         |
| YMR273C                                          | ZDS1          | YDR227W                 | SIR4          |
| YBR200W                                          | BEM1          | YDR379W                 | RGA2          |
| YNL127W                                          | FAR11         | YPR032W                 | SRO7          |
| YPL024W                                          | RMI1          | YKR059W                 | TIF1          |
| YMR199W                                          | CLN1          | YKR024C                 | DBP7          |
| YER116C                                          | SLX8          | YGL163C                 | RAD54         |
| YHR200W                                          | RPN10         | YJL140W                 | RPB4          |
| YER162C                                          | RAD4          | YBL025W                 | RRN10         |
| YML016C                                          | PPZ1          | YDR289C                 | RTT103        |
| YMR224C                                          | MRE11         | YML016C                 | PPZ1          |
| YPL024W                                          | RMI1          | YML001W                 | YPT7          |
| YIL034C                                          | CAP2          | YDR254W                 | CHL4          |
| YBR108W                                          | YBR108W       | YDR261C                 | EXG2          |
| YBR131W                                          | CCZ1          | YLR093C                 | NYV1          |
| YHR111W                                          | UBA4          | YHR012W                 | VPS29         |
| YJR140C                                          | HIR3          | YPL079W                 | RPL21B        |
| YNL201C                                          | PSY2          | YDR378C                 | LSM6          |
| YOR001W                                          | RRP6          | YBR215W                 | HPC2          |
| YKR099W                                          | BAS1          | YML071C                 | COG8          |
| YCL037C                                          | SRO9          | YDL077C                 | VAM6          |
| YHR111W                                          | UBA4          | YFR030W                 | MET10         |
| YBR200W                                          | BEM1          | YNL076W                 | MKS1          |
| YKL048C                                          | ELM1          | YJR060W                 | CBF1          |
| YMR116C                                          | ASC1          | YOR080W                 | DIA2          |
| YGL147C                                          | RPL9A         | YBR280C                 | SAF1          |
| YMR016C                                          | SOK2          | YPL195W                 | APL5          |
| YNR052C                                          | POP2          | YFR030W                 | MET10         |
| YGL033W                                          | HOP2          | YDR310C                 | SUM1          |

| Predictions at threshold level 0.75 continued... |               |                         |               |
|--------------------------------------------------|---------------|-------------------------|---------------|
| Gene1 of predicted pair                          |               | Gene2 of predicted pair |               |
| Systematic Name                                  | Standard Name | Systematic Name         | Standard Name |
| YGL163C                                          | RAD54         | YGR135W                 | PRE9          |
| YOR109W                                          | INP53         | YEL051W                 | VMA8          |
| YGL147C                                          | RPL9A         | YHR081W                 | LRP1          |
| YKR035W-A                                        | DID2          | YDR207C                 | UME6          |
| YLR441C                                          | RPS1A         | YGL212W                 | VAM7          |
| YHR013C                                          | ARD1          | YCR086W                 | CSM1          |
| YOR033C                                          | EXO1          | YDL020C                 | RPN4          |
| YIL002C                                          | INP51         | YDL226C                 | GCS1          |
| YBR126C                                          | TPS1          | YNL307C                 | MCK1          |
| YPL115C                                          | BEM3          | YHR012W                 | VPS29         |
| YDL006W                                          | PTC1          | YER162C                 | RAD4          |
| YEL065W                                          | SIT1          | YLR441C                 | RPS1A         |
| YCL037C                                          | SRO9          | YLR182W                 | SWI6          |
| YML115C                                          | VAN1          | YNL117W                 | MLS1          |
| YNL243W                                          | SLA2          | YBR098W                 | MMS4          |
| YPL178W                                          | CBC2          | YMR125W                 | STO1          |
| YPL234C                                          | TFP3          | YER120W                 | SCS2          |
| YGL094C                                          | PAN2          | YBR089C-A               | NHP6B         |
| YOR080W                                          | DIA2          | YJL124C                 | LSM1          |
| YNL288W                                          | CAF40         | YGR270W                 | YTA7          |
| YDR156W                                          | RPA14         | YPL089C                 | RLM1          |
| YPL253C                                          | VIK1          | YDR335W                 | MSN5          |
| YLR095C                                          | IOC2          | YBR108W                 | YBR108W       |
| YNL044W                                          | YIP3          | YNR049C                 | MSO1          |
| YDR443C                                          | SSN2          | YJR084W                 | CSN12         |
| YCR088W                                          | ABP1          | YLR370C                 | ARC18         |
| YDR379W                                          | RGA2          | YHR152W                 | SPO12         |
| YLR441C                                          | RPS1A         | YNL041C                 | COG6          |
| YLR234W                                          | TOP3          | YDR254W                 | CHL4          |

| Predictions at threshold level 0.75 continued... |               |                         |               |
|--------------------------------------------------|---------------|-------------------------|---------------|
| Gene1 of predicted pair                          |               | Gene2 of predicted pair |               |
| Systematic Name                                  | Standard Name | Systematic Name         | Standard Name |
| YML062C                                          | MFT1          | YJR035W                 | RAD26         |
| YGR252W                                          | GCN5          | YBR089C-A               | NHP6B         |
| YNL201C                                          | PSY2          | YJL006C                 | CTK2          |
| YBR239C                                          | YBR239C       | YOR284W                 | HUA2          |
| YPL001W                                          | HAT1          | YER161C                 | SPT2          |
| YHR039C-A                                        | VMA10         | YMR054W                 | STV1          |
| YNL094W                                          | APP1          | YLR064W                 | YLR064W       |
| YBR217W                                          | ATG12         | YLR320W                 | MMS22         |
| YLR102C                                          | APC9          | YDR264C                 | AKR1          |
| YLR079W                                          | SIC1          | YKL101W                 | HSL1          |
| YMR052W                                          | FAR3          | YNL127W                 | FAR11         |
| YJL006C                                          | CTK2          | YIL103W                 | DPH1          |
| YDR253C                                          | MET32         | YLR079W                 | SIC1          |
| YOR290C                                          | SNF2          | YOR327C                 | SNC2          |
| YPL037C                                          | EGD1          | YPL195W                 | APL5          |
| YJL095W                                          | BCK1          | YBR036C                 | CSG2          |
| YML028W                                          | TSA1          | YJR035W                 | RAD26         |
| YPL253C                                          | VIK1          | YLR425W                 | TUS1          |
| YOR127W                                          | RGA1          | YGR135W                 | PRE9          |
| YBR114W                                          | RAD16         | YGR188C                 | BUB1          |
| YDR129C                                          | SAC6          | YGR135W                 | PRE9          |
| YLR133W                                          | CKI1          | YMR022W                 | UBC7          |
| YLR093C                                          | NYV1          | YLR180W                 | SAM1          |
| YGL100W                                          | SEH1          | YNL082W                 | PMS1          |
| YDR318W                                          | MCM21         | YJL190C                 | RPS22A        |
| YDR004W                                          | RAD57         | YMR199W                 | CLN1          |
| YMR026C                                          | PEX12         | YHR156C                 | LIN1          |
| YOR069W                                          | VPS5          | YML071C                 | COG8          |
| YNL206C                                          | RTT106        | YPR120C                 | CLB5          |

| Predictions at threshold level 0.75 continued... |               |                         |               |
|--------------------------------------------------|---------------|-------------------------|---------------|
| Gene1 of predicted pair                          |               | Gene2 of predicted pair |               |
| Systematic Name                                  | Standard Name | Systematic Name         | Standard Name |
| YLR337C                                          | VRP1          | YDR310C                 | SUM1          |
| YOR275C                                          | RIM20         | YHL011C                 | PRS3          |
| YFR031C-A                                        | RPL2A         | YHR156C                 | LIN1          |
| YDR293C                                          | SSD1          | YDR137W                 | RGP1          |
| YDL223C                                          | HBT1          | YLR370C                 | ARC18         |
| YDR363W-A                                        | SEM1          | YOR275C                 | RIM20         |
| YNL236W                                          | SIN4          | YJR135C                 | MCM22         |
| YPL253C                                          | VIK1          | YPL057C                 | SUR1          |
| YPL240C                                          | HSP82         | YCL018W                 | LEU2          |
| YER116C                                          | SLX8          | YDR254W                 | CHL4          |
| YPL234C                                          | TFP3          | YER162C                 | RAD4          |
| YIL076W                                          | SEC28         | YER116C                 | SLX8          |
| YHR178W                                          | STB5          | YLR381W                 | CTF3          |
| YMR167W                                          | MLH1          | YGL019W                 | CKB1          |
| YLR192C                                          | HCR1          | YNL041C                 | COG6          |
| YJR032W                                          | CPR7          | YJL095W                 | BCK1          |
| YPR084W                                          | YPR084W       | YFR031C-A               | RPL2A         |
| YMR109W                                          | MYO5          | YJR135C                 | MCM22         |
| YNL325C                                          | FIG4          | YML071C                 | COG8          |
| YGL078C                                          | DBP3          | YBR030W                 | YBR030W       |
| YLR064W                                          | YLR064W       | YHR016C                 | YSC84         |
| YJL036W                                          | SNX4          | YGL212W                 | VAM7          |
| YER087C-B                                        | SBH1          | YBR171W                 | SEC66         |
| YBR126C                                          | TPS1          | YDL223C                 | HBT1          |
| YPL158C                                          | YPL158C       | YDL006W                 | PTC1          |
| YHR205W                                          | SCH9          | YNL199C                 | GCR2          |
| YOR191W                                          | RIS1          | YHR167W                 | THP2          |
| YNL215W                                          | IES2          | YKL110C                 | KTI12         |
| YOR212W                                          | STE4          | YPL256C                 | CLN2          |

| Predictions at threshold level 0.75 continued... |               |                         |               |
|--------------------------------------------------|---------------|-------------------------|---------------|
| Gene1 of predicted pair                          |               | Gene2 of predicted pair |               |
| Systematic Name                                  | Standard Name | Systematic Name         | Standard Name |
| YLR119W                                          | SRN2          | YJR084W                 | CSN12         |
| YEL013W                                          | VAC8          | YMR038C                 | CCS1          |
| YBR133C                                          | HSL7          | YBL002W                 | HTB2          |
| YGR104C                                          | SRB5          | YCL067C                 | HMLALPHA2     |
| YNR032C-A                                        | HUB1          | YLR313C                 | SPH1          |
| YBR108W                                          | YBR108W       | YOR023C                 | AHC1          |
| YFR031C-A                                        | RPL2A         | YLR386W                 | VAC14         |
| YHR200W                                          | RPN10         | YKR020W                 | VPS51         |
| YDR363W-A                                        | SEM1          | YMR276W                 | DSK2          |
| YNL166C                                          | BNI5          | YJR135C                 | MCM22         |
| YBL103C                                          | RTG3          | YPL037C                 | EGD1          |
| YGL087C                                          | MMS2          | YAL002W                 | VPS8          |
| YDR108W                                          | GSG1          | YDR207C                 | UME6          |
| YPR051W                                          | MAK3          | YER122C                 | GLO3          |
| YNL307C                                          | MCK1          | YJL006C                 | CTK2          |
| YAL024C                                          | LTE1          | YER161C                 | SPT2          |
| YMR198W                                          | CIK1          | YDR318W                 | MCM21         |
| YFR010W                                          | UBP6          | YDL002C                 | NHP10         |
| YDR440W                                          | DOT1          | YDR289C                 | RTT103        |
| YKL025C                                          | PAN3          | YEL056W                 | HAT2          |
| YNL243W                                          | SLA2          | YBL047C                 | EDE1          |
| YER116C                                          | SLX8          | YLR313C                 | SPH1          |
| YER096W                                          | SHC1          | YGR188C                 | BUB1          |
| YPL042C                                          | SSN3          | YER161C                 | SPT2          |
| YBR126C                                          | TPS1          | YMR230W                 | RPS10B        |
| YPL137C                                          | GIP3          | YLR371W                 | ROM2          |
| YER122C                                          | GLO3          | YDL137W                 | ARF2          |
| YER107C                                          | GLE2          | YNL271C                 | BNI1          |
| YDR383C                                          | NKP1          | YBR200W                 | BEM1          |

| Predictions at threshold level 0.75 continued... |               |                         |               |
|--------------------------------------------------|---------------|-------------------------|---------------|
| Gene1 of predicted pair                          |               | Gene2 of predicted pair |               |
| Systematic Name                                  | Standard Name | Systematic Name         | Standard Name |
| YDL127W                                          | PCL2          | YDR076W                 | RAD55         |
| YNL238W                                          | KEX2          | YDL192W                 | ARF1          |
| YMR216C                                          | SKY1          | YHR039C-A               | VMA10         |
| YNL215W                                          | IES2          | YPR120C                 | CLB5          |
| YLR119W                                          | SRN2          | YLR094C                 | GIS3          |
| YDL083C                                          | RPS16B        | YOL081W                 | IRA2          |
| YBR107C                                          | IML3          | YOR014W                 | RTS1          |
| YBR171W                                          | SEC66         | YPL256C                 | CLN2          |
| YGR249W                                          | MGA1          | YLR093C                 | NYV1          |
| YOR001W                                          | RRP6          | YGL003C                 | CDH1          |
| YMR224C                                          | MRE11         | YLR320W                 | MMS22         |
| YIL034C                                          | CAP2          | YOR367W                 | SCP1          |
| YBR200W                                          | BEM1          | YPL253C                 | VIK1          |
| YIL076W                                          | SEC28         | YOR001W                 | RRP6          |
| YER120W                                          | SCS2          | YNL041C                 | COG6          |
| YMR179W                                          | SPT21         | YPR120C                 | CLB5          |
| YGR249W                                          | MGA1          | YKR035W-A               | DID2          |
| YAL024C                                          | LTE1          | YGR249W                 | MGA1          |
| YOR001W                                          | RRP6          | YDR318W                 | MCM21         |
| YKR059W                                          | TIF1          | YLR435W                 | TSR2          |
| YNL021W                                          | HDA1          | YDR295C                 | HDA2          |
| YDR318W                                          | MCM21         | YER122C                 | GLO3          |
| YBR200W                                          | BEM1          | YEL060C                 | PRB1          |
| YDR439W                                          | LRS4          | YNL116W                 | DMA2          |
| YNL087W                                          | TCB2          | YBR280C                 | SAF1          |
| YNL248C                                          | RPA49         | YHR111W                 | UBA4          |
| YDL192W                                          | ARF1          | YBR036C                 | CSG2          |
| YPL045W                                          | VPS16         | YOR035C                 | SHE4          |
| YMR080C                                          | NAM7          | YHR052W                 | CIC1          |



| Predictions at threshold level 0.75 continued... |               |                         |               |
|--------------------------------------------------|---------------|-------------------------|---------------|
| Gene1 of predicted pair                          |               | Gene2 of predicted pair |               |
| Systematic Name                                  | Standard Name | Systematic Name         | Standard Name |
| YJR060W                                          | CBF1          | YCR086W                 | CSM1          |
| YDL192W                                          | ARF1          | YNL051W                 | COG5          |
| YKR035W-A                                        | DID2          | YBR036C                 | CSG2          |
| YGR135W                                          | PRE9          | YMR038C                 | CCS1          |
| YDL056W                                          | MBP1          | YPL161C                 | BEM4          |
| YMR153W                                          | NUP53         | YLR370C                 | ARC18         |
| YDR385W                                          | EFT2          | YLR131C                 | ACE2          |
| YPL115C                                          | BEM3          | YGR188C                 | BUB1          |
| YGL135W                                          | RPL1B         | YGR105W                 | VMA21         |
| YNL206C                                          | RTT106        | YJL006C                 | CTK2          |
| YMR224C                                          | MRE11         | YLR192C                 | HCR1          |
| YGR054W                                          | YGR054W       | YEL056W                 | HAT2          |
| YDR484W                                          | VPS52         | YER122C                 | GLO3          |
| YBR010W                                          | HHT1          | YJL140W                 | RPB4          |
| YBL058W                                          | SHP1          | YLR398C                 | SKI2          |
| YFR010W                                          | UBP6          | YDR363W-A               | SEM1          |
| YFR010W                                          | UBP6          | YML071C                 | COG8          |
| YHL031C                                          | GOS1          | YDL192W                 | ARF1          |
| YPR084W                                          | YPR084W       | YDR080W                 | VPS41         |
| YHR134W                                          | WSS1          | YER116C                 | SLX8          |
| YFR031C-A                                        | RPL2A         | YOL018C                 | TLG2          |
| YNL201C                                          | PSY2          | YNL307C                 | MCK1          |
| YBR084C-A                                        | RPL19A        | YDR264C                 | AKR1          |
| YGL133W                                          | ITC1          | YJL136C                 | RPS21B        |
| YBR108W                                          | YBR108W       | YFL023W                 | BUD27         |
| YJL154C                                          | VPS35         | YLR381W                 | CTF3          |
| YBR084C-A                                        | RPL19A        | YKL101W                 | HSL1          |
| YGR261C                                          | APL6          | YER122C                 | GLO3          |
| YDL020C                                          | RPN4          | YOR014W                 | RTS1          |

| Predictions at threshold level 0.75 continued... |               |                         |               |
|--------------------------------------------------|---------------|-------------------------|---------------|
| Gene1 of predicted pair                          |               | Gene2 of predicted pair |               |
| Systematic Name                                  | Standard Name | Systematic Name         | Standard Name |
| YMR273C                                          | ZDS1          | YIL033C                 | BCY1          |
| YDR261C                                          | EXG2          | YNL238W                 | KEX2          |
| YOR001W                                          | RRP6          | YML028W                 | TSA1          |
| YOR033C                                          | EXO1          | YJR035W                 | RAD26         |
| YLR079W                                          | SIC1          | YLR182W                 | SWI6          |
| YIL033C                                          | BCY1          | YJL164C                 | TPK1          |
| YBR217W                                          | ATG12         | YBR171W                 | SEC66         |
| YBR194W                                          | SOY1          | YER161C                 | SPT2          |
| YDR261C                                          | EXG2          | YNL041C                 | COG6          |
| YER116C                                          | SLX8          | YPR030W                 | CSR2          |
| YKL139W                                          | CTK1          | YGR188C                 | BUB1          |
| YNL201C                                          | PSY2          | YOL054W                 | PSH1          |
| YDR202C                                          | RAV2          | YAL002W                 | VPS8          |
| YNL054W                                          | VAC7          | YAL010C                 | MDM10         |
| YIL036W                                          | CST6          | YGR014W                 | MSB2          |
| YPL129W                                          | TAF14         | YOR038C                 | HIR2          |
| YNL106C                                          | INP52         | YDR335W                 | MSN5          |
| YDR004W                                          | RAD57         | YHR200W                 | RPN10         |
| YLR119W                                          | SRN2          | YER144C                 | UBP5          |
| YNL025C                                          | SSN8          | YNL288W                 | CAF40         |
| YJR024C                                          | MDE1          | YMR199W                 | CLN1          |
| YML115C                                          | VAN1          | YKR035W-A               | DID2          |
| YNL201C                                          | PSY2          | YPR040W                 | TIP41         |
| YIL053W                                          | RHR2          | YPR036W                 | VMA13         |
| YPR018W                                          | RLF2          | YGL025C                 | PGD1          |
| YBL051C                                          | PIN4          | YGR054W                 | YGR054W       |
| YMR198W                                          | CIK1          | YHR200W                 | RPN10         |
| YHR111W                                          | UBA4          | YNL107W                 | YAF9          |
| YFR031C-A                                        | RPL2A         | YMR026C                 | PEX12         |

| Predictions at threshold level 0.75 continued... |               |                         |               |
|--------------------------------------------------|---------------|-------------------------|---------------|
| Gene1 of predicted pair                          |               | Gene2 of predicted pair |               |
| Systematic Name                                  | Standard Name | Systematic Name         | Standard Name |
| YHR060W                                          | VMA22         | YCR053W                 | THR4          |
| YMR199W                                          | CLN1          | YBR215W                 | HPC2          |
| YML095C                                          | RAD10         | YDL226C                 | GCS1          |
| YDR174W                                          | HMO1          | YDR254W                 | CHL4          |
| YBR019C                                          | GAL10         | YER040W                 | GLN3          |
| YOR141C                                          | ARP8          | YGR188C                 | BUB1          |
| YGR249W                                          | MGA1          | YLR441C                 | RPS1A         |
| YPR030W                                          | CSR2          | YNL076W                 | MKS1          |
| YLR429W                                          | CRN1          | YNL236W                 | SIN4          |
| YMR231W                                          | PEP5          | YOR036W                 | PEP12         |
| YBL058W                                          | SHP1          | YMR153W                 | NUP53         |
| YNL264C                                          | PDR17         | YOL110W                 | SHR5          |
| YDR108W                                          | GSG1          | YML038C                 | YMD8          |
| YDL047W                                          | SIT4          | YHR115C                 | DMA1          |
| YGR239C                                          | PEX21         | YGR077C                 | PEX8          |
| YOR106W                                          | VAM3          | YBR036C                 | CSG2          |
| YBL102W                                          | SFT2          | YOL108C                 | INO4          |
| YER116C                                          | SLX8          | YBR019C                 | GAL10         |
| YMR026C                                          | PEX12         | YKL116C                 | PRR1          |
| YEL065W                                          | SIT1          | YPL037C                 | EGD1          |
| YOR035C                                          | SHE4          | YER122C                 | GLO3          |
| YBR215W                                          | HPC2          | YEL056W                 | HAT2          |
| YMR224C                                          | MRE11         | YDL184C                 | RPL41A        |
| YBR194W                                          | SOY1          | YGL174W                 | BUD13         |
| YFL013C                                          | IES1          | YDR245W                 | MNN10         |
| YBR274W                                          | CHK1          | YGL175C                 | SAE2          |
| YML001W                                          | YPT7          | YGR105W                 | VMA21         |
| YNL215W                                          | IES2          | YHR013C                 | ARD1          |
| YHR200W                                          | RPN10         | YOR308C                 | SNU66         |

| Predictions at threshold level 0.75 continued... |               |                         |               |
|--------------------------------------------------|---------------|-------------------------|---------------|
| Gene1 of predicted pair                          |               | Gene2 of predicted pair |               |
| Systematic Name                                  | Standard Name | Systematic Name         | Standard Name |
| YHR178W                                          | STB5          | YGL151W                 | NUT1          |
| YOR085W                                          | OST3          | YML019W                 | OST6          |
| YPL239W                                          | YAR1          | YKL143W                 | LTV1          |
| YDR083W                                          | RRP8          | YOR001W                 | RRP6          |
| YDL059C                                          | RAD59         | YOR312C                 | RPL20B        |
| YHR156C                                          | LIN1          | YGL124C                 | MON1          |
| YNL032W                                          | SIW14         | YGL212W                 | VAM7          |
| YKR101W                                          | SIR1          | YKL160W                 | ELF1          |
| YGR104C                                          | SRB5          | YLR350W                 | ORM2          |
| YOR290C                                          | SNF2          | YBR280C                 | SAF1          |
| YMR080C                                          | NAM7          | YHR167W                 | THP2          |
| YBR131W                                          | CCZ1          | YKL048C                 | ELM1          |
| YMR311C                                          | GLC8          | YER122C                 | GLO3          |
| YAL024C                                          | LTE1          | YJR084W                 | CSN12         |
| YDL232W                                          | OST4          | YER019C-A               | SBH2          |
| YMR152W                                          | YIM1          | YBR019C                 | GAL10         |
| YGR249W                                          | MGA1          | YNL032W                 | SIW14         |
| YKL116C                                          | PRR1          | YPL137C                 | GIP3          |
| YLR441C                                          | RPS1A         | YMR214W                 | SCJ1          |
| YKL160W                                          | ELF1          | YLR315W                 | NKP2          |
| YML115C                                          | VAN1          | YOR014W                 | RTS1          |
| YPR040W                                          | TIP41         | YJL095W                 | BCK1          |
| YLR292C                                          | SEC72         | YER110C                 | KAP123        |
| YMR153W                                          | NUP53         | YKL068W                 | NUP100        |
| YCL001W                                          | RER1          | YDL006W                 | PTC1          |
| YBR228W                                          | SLX1          | YER116C                 | SLX8          |
| YHR039C-A                                        | VMA10         | YGR105W                 | VMA21         |
| YCR066W                                          | RAD18         | YOL108C                 | INO4          |
| YHR013C                                          | ARD1          | YDR440W                 | DOT1          |

| Predictions at threshold level 0.75 continued... |               |                         |               |
|--------------------------------------------------|---------------|-------------------------|---------------|
| Gene1 of predicted pair                          |               | Gene2 of predicted pair |               |
| Systematic Name                                  | Standard Name | Systematic Name         | Standard Name |
| YLR370C                                          | ARC18         | YKL114C                 | APN1          |
| YNL032W                                          | SIW14         | YPL195W                 | APL5          |
| YLR058C                                          | SHM2          | YJR060W                 | CBF1          |
| YKL139W                                          | CTK1          | YNL329C                 | PEX6          |
| YLR386W                                          | VAC14         | YLR447C                 | VMA6          |
| YGL003C                                          | CDH1          | YJR084W                 | CSN12         |
| YML071C                                          | COG8          | YOL108C                 | INO4          |
| YMR199W                                          | CLN1          | YJL187C                 | SWE1          |
| YOR109W                                          | INP53         | YKR001C                 | VPS1          |
| YDL184C                                          | RPL41A        | YBR108W                 | YBR108W       |
| YKR001C                                          | VPS1          | YPL259C                 | APM1          |
| YOL121C                                          | RPS19A        | YJL183W                 | MNN11         |
| YOR327C                                          | SNC2          | YEL013W                 | VAC8          |
| YMR091C                                          | NPL6          | YNL041C                 | COG6          |
| YOR195W                                          | SLK19         | YLR254C                 | NDL1          |
| YDR484W                                          | VPS52         | YDR358W                 | GGA1          |
| YHL031C                                          | GOS1          | YCR066W                 | RAD18         |
| YML115C                                          | VAN1          | YKR014C                 | YPT52         |
| YOR106W                                          | VAM3          | YML001W                 | YPT7          |
| YPR171W                                          | BSP1          | YNL106C                 | INP52         |
| YJL154C                                          | VPS35         | YER049W                 | TPA1          |
| YMR153W                                          | NUP53         | YNL087W                 | TCB2          |
| YER129W                                          | SAK1          | YDR507C                 | GIN4          |
| YMR116C                                          | ASC1          | YKR020W                 | VPS51         |
| YOR337W                                          | TEA1          | YDR484W                 | VPS52         |
| YDR245W                                          | MNN10         | YAL002W                 | VPS8          |
| YOR039W                                          | CKB2          | YOL081W                 | IRA2          |
| YMR311C                                          | GLC8          | YER049W                 | TPA1          |
| YNL199C                                          | GCR2          | YLR425W                 | TUS1          |

| Predictions at threshold level 0.75 continued... |               |                         |               |
|--------------------------------------------------|---------------|-------------------------|---------------|
| Gene1 of predicted pair                          |               | Gene2 of predicted pair |               |
| Systematic Name                                  | Standard Name | Systematic Name         | Standard Name |
| YLR119W                                          | SRN2          | YDR310C                 | SUM1          |
| YDR108W                                          | GSG1          | YNL041C                 | COG6          |
| YCL037C                                          | SRO9          | YKR030W                 | GMH1          |
| YMR224C                                          | MRE11         | YLR399C                 | BDF1          |
| YBR131W                                          | CCZ1          | YDR202C                 | RAV2          |
| YPL042C                                          | SSN3          | YDR469W                 | SDC1          |
| YOL111C                                          | MDY2          | YPL161C                 | BEM4          |
| YPL042C                                          | SSN3          | YHL031C                 | GOS1          |
| YPL022W                                          | RAD1          | YGL190C                 | CDC55         |
| YDR108W                                          | GSG1          | YDR202C                 | RAV2          |
| YMR224C                                          | MRE11         | YDR183W                 | PLP1          |
| YDL083C                                          | RPS16B        | YNL041C                 | COG6          |
| YLR360W                                          | VPS38         | YPR046W                 | MCM16         |
| YLR410W                                          | VIP1          | YOL090W                 | MSH2          |
| YPL089C                                          | RLM1          | YMR038C                 | CCS1          |
| YLR288C                                          | MEC3          | YMR167W                 | MLH1          |
| YJL154C                                          | VPS35         | YNL044W                 | YIP3          |
| YOR069W                                          | VPS5          | YAL002W                 | VPS8          |
| YDL175C                                          | AIR2          | YJL124C                 | LSM1          |
| YLR371W                                          | ROM2          | YGL124C                 | MON1          |
| YIR009W                                          | MSL1          | YJR050W                 | ISY1          |
| YOR106W                                          | VAM3          | YMR311C                 | GLC8          |
| YJL141C                                          | YAK1          | YPR119W                 | CLB2          |
| YLR370C                                          | ARC18         | YEL060C                 | PRB1          |
| YJL124C                                          | LSM1          | YOR038C                 | HIR2          |
| YPR030W                                          | CSR2          | YMR152W                 | YIM1          |
| YNL031C                                          | HHT2          | YOR038C                 | HIR2          |
| YDR484W                                          | VPS52         | YGL124C                 | MON1          |
| YMR109W                                          | MYO5          | YPL234C                 | TFP3          |

| Predictions at threshold level 0.75 continued... |               |                         |               |
|--------------------------------------------------|---------------|-------------------------|---------------|
| Gene1 of predicted pair                          |               | Gene2 of predicted pair |               |
| Systematic Name                                  | Standard Name | Systematic Name         | Standard Name |
| YGR252W                                          | GCN5          | YCR084C                 | TUP1          |
| YHL031C                                          | GOS1          | YDR202C                 | RAV2          |
| YLR452C                                          | SST2          | YMR214W                 | SCJ1          |
| YBR194W                                          | SOY1          | YDR335W                 | MSN5          |
| YJL095W                                          | BCK1          | YLR032W                 | RAD5          |
| YKL116C                                          | PRR1          | YJR056C                 | YJR056C       |
| YLR192C                                          | HCR1          | YGL124C                 | MON1          |
| YER161C                                          | SPT2          | YCR077C                 | PAT1          |
| YNL069C                                          | RPL16B        | YNL297C                 | MON2          |
| YMR038C                                          | CCS1          | YJR035W                 | RAD26         |
| YDR293C                                          | SSD1          | YDR144C                 | MKC7          |
| YJL047C                                          | RTT101        | YER105C                 | NUP157        |
| YGL003C                                          | CDH1          | YBR036C                 | CSG2          |
| YJL004C                                          | SYS1          | YER162C                 | RAD4          |
| YPL024W                                          | RMI1          | YJL124C                 | LSM1          |
| YNL291C                                          | MID1          | YPL057C                 | SUR1          |
| YGL124C                                          | MON1          | YDR207C                 | UME6          |
| YDR225W                                          | HTA1          | YHR200W                 | RPN10         |
| YBR200W                                          | BEM1          | YBR036C                 | CSG2          |
| YOR195W                                          | SLK19         | YNL236W                 | SIN4          |
| YBR228W                                          | SLX1          | YNL016W                 | PUB1          |
| YLR441C                                          | RPS1A         | YOR327C                 | SNC2          |
| YGR054W                                          | YGR054W       | YJR032W                 | CPR7          |
| YLR381W                                          | CTF3          | YNL107W                 | YAF9          |
| YGL163C                                          | RAD54         | YLR352W                 | YLR352W       |
| YGL161C                                          | YIP5          | YAL002W                 | VPS8          |
| YGL054C                                          | ERV14         | YER120W                 | SCS2          |
| YOR231W                                          | MKK1          | YPR119W                 | CLB2          |
| YGL212W                                          | VAM7          | YPR051W                 | MAK3          |

| Predictions at threshold level 0.75 continued... |               |                         |               |
|--------------------------------------------------|---------------|-------------------------|---------------|
| Gene1 of predicted pair                          |               | Gene2 of predicted pair |               |
| Systematic Name                                  | Standard Name | Systematic Name         | Standard Name |
| YBL102W                                          | SFT2          | YNL051W                 | COG5          |
| YPL161C                                          | BEM4          | YEL056W                 | HAT2          |
| YNL325C                                          | FIG4          | YGL124C                 | MON1          |
| YKL126W                                          | YPK1          | YGL003C                 | CDH1          |
| YPR051W                                          | MAK3          | YHL020C                 | OPI1          |
| YCR086W                                          | CSM1          | YKL101W                 | HSL1          |
| YNL041C                                          | COG6          | YJL004C                 | SYS1          |
| YGL178W                                          | MPT5          | YDR293C                 | SSD1          |
| YLR435W                                          | TSR2          | YJR032W                 | CPR7          |
| YML016C                                          | PPZ1          | YKR061W                 | KTR2          |
| YLR352W                                          | YLR352W       | YOR368W                 | RAD17         |
| YMR055C                                          | BUB2          | YMR167W                 | MLH1          |
| YBR278W                                          | DPB3          | YGL163C                 | RAD54         |
| YJL154C                                          | VPS35         | YMR055C                 | BUB2          |
| YOR327C                                          | SNC2          | YNL116W                 | DMA2          |
| YCR066W                                          | RAD18         | YEL053C                 | MAK10         |
| YKL139W                                          | CTK1          | YPR036W                 | VMA13         |
| YIL159W                                          | BNR1          | YER040W                 | GLN3          |
| YLR410W                                          | VIP1          | YFR030W                 | MET10         |
| YBR108W                                          | YBR108W       | YJR032W                 | CPR7          |
| YOR080W                                          | DIA2          | YGL174W                 | BUD13         |
| YGL087C                                          | MMS2          | YOR368W                 | RAD17         |
| YBR127C                                          | VMA2          | YKL119C                 | VPH2          |
| YNL041C                                          | COG6          | YOL081W                 | IRA2          |
| YKL116C                                          | PRR1          | YEL060C                 | PRB1          |
| YOR101W                                          | RAS1          | YNL236W                 | SIN4          |
| YLR306W                                          | UBC12         | YMR038C                 | CCS1          |
| YML001W                                          | YPT7          | YOL121C                 | RPS19A        |
| YMR164C                                          | MSS11         | YGL016W                 | KAP122        |



| Predictions at threshold level 0.75 continued... |               |                         |               |
|--------------------------------------------------|---------------|-------------------------|---------------|
| Gene1 of predicted pair                          |               | Gene2 of predicted pair |               |
| Systematic Name                                  | Standard Name | Systematic Name         | Standard Name |
| YLR352W                                          | YLR352W       | YML028W                 | TSA1          |
| YGL178W                                          | MPT5          | YGR200C                 | ELP2          |
| YGL212W                                          | VAM7          | YPL195W                 | APL5          |
| YEL009C                                          | GCN4          | YDR443C                 | SSN2          |
| YDR363W                                          | ESC2          | YNL243W                 | SLA2          |
| YNL325C                                          | FIG4          | YOL121C                 | RPS19A        |
| YGL078C                                          | DBP3          | YLR180W                 | SAM1          |
| YNL307C                                          | MCK1          | YLR094C                 | GIS3          |
| YMR016C                                          | SOK2          | YLR452C                 | SST2          |
| YFR040W                                          | SAP155        | YDR310C                 | SUM1          |
| YJL184W                                          | GON7          | YGR262C                 | BUD32         |
| YDL184C                                          | RPL41A        | YDL192W                 | ARF1          |
| YCR088W                                          | ABP1          | YHR016C                 | YSC84         |
| YOR270C                                          | VPH1          | YPR046W                 | MCM16         |
| YJL124C                                          | LSM1          | YNL145W                 | MFA2          |
| YLL007C                                          | YLL007C       | YNL107W                 | YAF9          |
| YBR173C                                          | UMP1          | YNL307C                 | MCK1          |
| YDR443C                                          | SSN2          | YKL126W                 | YPK1          |
| YFR010W                                          | UBP6          | YBR215W                 | HPC2          |
| YOR332W                                          | VMA4          | YBL047C                 | EDE1          |
| YLR093C                                          | NYV1          | YLR398C                 | SKI2          |
| YHR081W                                          | LRP1          | YPR030W                 | CSR2          |
| YNL325C                                          | FIG4          | YMR214W                 | SCJ1          |
| YMR284W                                          | YKU70         | YGL031C                 | RPL24A        |
| YGL223C                                          | COG1          | YEL051W                 | VMA8          |
| YHR178W                                          | STB5          | YGL253W                 | HXK2          |
| YML001W                                          | YPT7          | YBR036C                 | CSG2          |
| YHR079C                                          | IRE1          | YGR252W                 | GCN5          |
| YML095C                                          | RAD10         | YDR289C                 | RTT103        |

| Predictions at threshold level 0.75 continued... |               |                         |               |
|--------------------------------------------------|---------------|-------------------------|---------------|
| Gene1 of predicted pair                          |               | Gene2 of predicted pair |               |
| Systematic Name                                  | Standard Name | Systematic Name         | Standard Name |
| YDR225W                                          | HTA1          | YFR034C                 | PHO4          |
| YGL241W                                          | KAP114        | YGR252W                 | GCN5          |
| YNL107W                                          | YAF9          | YOL108C                 | INO4          |
| YLR288C                                          | MEC3          | YMR231W                 | PEP5          |
| YMR016C                                          | SOK2          | YKL048C                 | ELM1          |
| YPL253C                                          | VIK1          | YMR055C                 | BUB2          |
| YBR019C                                          | GAL10         | YGL252C                 | RTG2          |
| YLR192C                                          | HCR1          | YPL161C                 | BEM4          |
| YBR200W                                          | BEM1          | YML071C                 | COG8          |
| YGR229C                                          | SMI1          | YGL190C                 | CDC55         |
| YDR490C                                          | PKH1          | YHR205W                 | SCH9          |
| YDR293C                                          | SSD1          | YBR131W                 | CCZ1          |
| YIL053W                                          | RHR2          | YOL081W                 | IRA2          |
| YPL195W                                          | APL5          | YJL183W                 | MNN11         |
| YDR004W                                          | RAD57         | YDR097C                 | MSH6          |
| YDR335W                                          | MSN5          | YGL163C                 | RAD54         |
| YPL057C                                          | SUR1          | YNL199C                 | GCR2          |
| YBR200W                                          | BEM1          | YCR077C                 | PAT1          |
| YFR010W                                          | UBP6          | YER040W                 | GLN3          |
| YDR174W                                          | HMO1          | YMR055C                 | BUB2          |
| YHL031C                                          | GOS1          | YML067C                 | ERV41         |
| YOR008C                                          | SLG1          | YPL256C                 | CLN2          |
| YLR192C                                          | HCR1          | YNL087W                 | TCB2          |
| YDR244W                                          | PEX5          | YNL214W                 | PEX17         |
| YGL163C                                          | RAD54         | YOL054W                 | PSH1          |
| YJR040W                                          | GEF1          | YNL041C                 | COG6          |
| YKR059W                                          | TIF1          | YGL250W                 | RMR1          |
| YPL057C                                          | SUR1          | YJR135C                 | MCM22         |
| YKL129C                                          | MYO3          | YJL095W                 | BCK1          |

| Predictions at threshold level 0.75 continued... |               |                         |               |
|--------------------------------------------------|---------------|-------------------------|---------------|
| Gene1 of predicted pair                          |               | Gene2 of predicted pair |               |
| Systematic Name                                  | Standard Name | Systematic Name         | Standard Name |
| YMR095C                                          | SNO1          | YER144C                 | UBP5          |
| YJL176C                                          | SWI3          | YHR077C                 | NMD2          |
| YMR127C                                          | SAS2          | YLR447C                 | VMA6          |
| YBR215W                                          | HPC2          | YBR089C-A               | NHP6B         |
| YGL200C                                          | EMP24         | YEL036C                 | ANP1          |
| YLR083C                                          | EMP70         | YEL053C                 | MAK10         |
| YDR156W                                          | RPA14         | YCR086W                 | CSM1          |
| YMR026C                                          | PEX12         | YER044C                 | ERG28         |
| YDL116W                                          | NUP84         | YDL101C                 | DUN1          |
| YKL139W                                          | CTK1          | YBL103C                 | RTG3          |
| YDL116W                                          | NUP84         | YDR335W                 | MSN5          |
| YPR036W                                          | VMA13         | YDL185W                 | TFP1          |
| YBR084C-A                                        | RPL19A        | YBL047C                 | EDE1          |
| YFR010W                                          | UBP6          | YLR381W                 | CTF3          |
| YKR001C                                          | VPS1          | YJR032W                 | CPR7          |
| YGR108W                                          | CLB1          | YJR032W                 | CPR7          |
| YPL057C                                          | SUR1          | YMR133W                 | REC114        |
| YDR202C                                          | RAV2          | YNL041C                 | COG6          |
| YLR410W                                          | VIP1          | YOL091W                 | SPO21         |
| YOR106W                                          | VAM3          | YCR066W                 | RAD18         |
| YMR199W                                          | CLN1          | YDL006W                 | PTC1          |
| YHR134W                                          | WSS1          | YDR155C                 | CPR1          |
| YBR172C                                          | SMY2          | YPR119W                 | CLB2          |
| YDR183W                                          | PLP1          | YBR114W                 | RAD16         |
| YAL024C                                          | LTE1          | YFR010W                 | UBP6          |
| YML109W                                          | ZDS2          | YPL161C                 | BEM4          |
| YKL139W                                          | CTK1          | YLR371W                 | ROM2          |
| YBR194W                                          | SOY1          | YKL160W                 | ELF1          |
| YMR153W                                          | NUP53         | YOR035C                 | SHE4          |

| Predictions at threshold level 0.75 continued... |               |                         |               |
|--------------------------------------------------|---------------|-------------------------|---------------|
| Gene1 of predicted pair                          |               | Gene2 of predicted pair |               |
| Systematic Name                                  | Standard Name | Systematic Name         | Standard Name |
| YMR192W                                          | GYL1          | YPR154W                 | PIN3          |
| YPL115C                                          | BEM3          | YBR200W                 | BEM1          |
| YOR038C                                          | HIR2          | YAL002W                 | VPS8          |
| YKL139W                                          | CTK1          | YNL031C                 | HHT2          |
| YNL199C                                          | GCR2          | YOR124C                 | UBP2          |
| YML117W                                          | NAB6          | YPL089C                 | RLM1          |
| YMR127C                                          | SAS2          | YDR310C                 | SUM1          |
| YIL103W                                          | DPH1          | YDR183W                 | PLP1          |
| YLR386W                                          | VAC14         | YMR230W                 | RPS10B        |
| YBL058W                                          | SHP1          | YPL057C                 | SUR1          |
| YOR195W                                          | SLK19         | YGR184C                 | UBR1          |
| YGL025C                                          | PGD1          | YMR133W                 | REC114        |
| YPL137C                                          | GIP3          | YDR358W                 | GGA1          |
| YOL030W                                          | GAS5          | YML028W                 | TSA1          |
| YMR199W                                          | CLN1          | YPR120C                 | CLB5          |
| YKL048C                                          | ELM1          | YMR230W                 | RPS10B        |
| YDR245W                                          | MNN10         | YHR158C                 | KEL1          |
| YNL307C                                          | MCK1          | YCR086W                 | CSM1          |
| YML001W                                          | YPT7          | YDL006W                 | PTC1          |
| YML013W                                          | UBX2          | YDL155W                 | CLB3          |
| YDL006W                                          | PTC1          | YAR014C                 | BUD14         |
| YEL043W                                          | YEL043W       | YDR310C                 | SUM1          |
| YMR026C                                          | PEX12         | YOR327C                 | SNC2          |
| YHR081W                                          | LRP1          | YOR035C                 | SHE4          |
| YKL126W                                          | YPK1          | YPR036W                 | VMA13         |
| YDR264C                                          | AKR1          | YKL101W                 | HSL1          |
| YKR099W                                          | BAS1          | YGL124C                 | MON1          |
| YMR224C                                          | MRE11         | YOR032C                 | HMS1          |
| YHR111W                                          | UBA4          | YPL018W                 | CTF19         |

| Predictions at threshold level 0.75 continued... |               |                         |               |
|--------------------------------------------------|---------------|-------------------------|---------------|
| Gene1 of predicted pair                          |               | Gene2 of predicted pair |               |
| Systematic Name                                  | Standard Name | Systematic Name         | Standard Name |
| YDL184C                                          | RPL41A        | YMR133W                 | REC114        |
| YMR133W                                          | REC114        | YML071C                 | COG8          |
| YBL019W                                          | APN2          | YHR056C                 | RSC30         |
| YDR261C                                          | EXG2          | YBR019C                 | GAL10         |
| YDR129C                                          | SAC6          | YFR040W                 | SAP155        |
| YGR072W                                          | UPF3          | YPL120W                 | VPS30         |
| YOR112W                                          | CEX1          | YDR202C                 | RAV2          |
| YOR358W                                          | HAP5          | YDR183W                 | PLP1          |
| YIL034C                                          | CAP2          | YPR051W                 | MAK3          |
| YML071C                                          | COG8          | YEL060C                 | PRB1          |
| YBR089C-A                                        | NHP6B         | YLR357W                 | RSC2          |
| YKR101W                                          | SIR1          | YNL107W                 | YAF9          |
| YMR133W                                          | REC114        | YPL195W                 | APL5          |
| YDL116W                                          | NUP84         | YIR005W                 | IST3          |
| YDL059C                                          | RAD59         | YJR035W                 | RAD26         |
| YBR108W                                          | YBR108W       | YMR214W                 | SCJ1          |
| YER116C                                          | SLX8          | YMR055C                 | BUB2          |
| YNL025C                                          | SSN8          | YDR335W                 | MSN5          |
| YNL135C                                          | FPR1          | YGL212W                 | VAM7          |
| YBL103C                                          | RTG3          | YLR094C                 | GIS3          |
| YCR065W                                          | HCM1          | YJR060W                 | CBF1          |
| YJL095W                                          | BCK1          | YLR233C                 | EST1          |
| YOR212W                                          | STE4          | YPL161C                 | BEM4          |
| YFR031C-A                                        | RPL2A         | YPL024W                 | RMI1          |
| YGR252W                                          | GCN5          | YOR275C                 | RIM20         |
| YBR200W                                          | BEM1          | YMR152W                 | YIM1          |
| YMR216C                                          | SKY1          | YCL001W                 | RER1          |
| YKL068W                                          | NUP100        | YGR059W                 | SPR3          |
| YDR245W                                          | MNN10         | YLR315W                 | NKP2          |

| Predictions at threshold level 0.75 continued... |               |                         |               |
|--------------------------------------------------|---------------|-------------------------|---------------|
| Gene1 of predicted pair                          |               | Gene2 of predicted pair |               |
| Systematic Name                                  | Standard Name | Systematic Name         | Standard Name |
| YAL024C                                          | LTE1          | YGL025C                 | PGD1          |
| YLR144C                                          | ACF2          | YPL249C                 | GYP5          |
| YBR173C                                          | UMP1          | YML115C                 | VAN1          |
| YDR293C                                          | SSD1          | YMR055C                 | BUB2          |
| YAL024C                                          | LTE1          | YKL080W                 | VMA5          |
| YHR156C                                          | LIN1          | YBR019C                 | GAL10         |
| YDR439W                                          | LRS4          | YIL103W                 | DPH1          |
| YDL006W                                          | PTC1          | YLR398C                 | SKI2          |
| YOR076C                                          | SKI7          | YCL037C                 | SRO9          |
| YDL042C                                          | SIR2          | YMR273C                 | ZDS1          |
| YOR275C                                          | RIM20         | YKL002W                 | DID4          |
| YLR447C                                          | VMA6          | YMR054W                 | STV1          |
| YNL044W                                          | YIP3          | YOL018C                 | TLG2          |
| YKL116C                                          | PRR1          | YER116C                 | SLX8          |
| YKL048C                                          | ELM1          | YHL002W                 | HSE1          |
| YGR004W                                          | PEX31         | YBR168W                 | PEX32         |
| YMR273C                                          | ZDS1          | YDR309C                 | GIC2          |
| YIL053W                                          | RHR2          | YLR441C                 | RPS1A         |
| YGR166W                                          | KRE11         | YEL022W                 | GEA2          |
| YMR205C                                          | PFK2          | YJL117W                 | PHO86         |
| YDR477W                                          | SNF1          | YOR043W                 | WHI2          |
| YML016C                                          | PPZ1          | YOR368W                 | RAD17         |
| YMR116C                                          | ASC1          | YNL079C                 | TPM1          |
| YDR254W                                          | CHL4          | YJR135C                 | MCM22         |
| YKL116C                                          | PRR1          | YFL023W                 | BUD27         |
| YMR016C                                          | SOK2          | YGL115W                 | SNF4          |
| YDR254W                                          | CHL4          | YDL226C                 | GCS1          |
| YIL034C                                          | CAP2          | YCR088W                 | ABP1          |
| YLR386W                                          | VAC14         | YJL136C                 | RPS21B        |

| Predictions at threshold level 0.75 continued... |               |                         |               |
|--------------------------------------------------|---------------|-------------------------|---------------|
| Gene1 of predicted pair                          |               | Gene2 of predicted pair |               |
| Systematic Name                                  | Standard Name | Systematic Name         | Standard Name |
| YGL115W                                          | SNF4          | YJL004C                 | SYS1          |
| YAL051W                                          | OAF1          | YGL161C                 | YIP5          |
| YNL068C                                          | FKH2          | YKL101W                 | HSL1          |
| YLR386W                                          | VAC14         | YGL031C                 | RPL24A        |
| YKL074C                                          | MUD2          | YLR357W                 | RSC2          |
| YAL024C                                          | LTE1          | YMR026C                 | PEX12         |
| YLR079W                                          | SIC1          | YJR060W                 | CBF1          |
| YOL111C                                          | MDY2          | YFR036W                 | CDC26         |
| YKR001C                                          | VPS1          | YNL107W                 | YAF9          |
| YNL291C                                          | MID1          | YNL117W                 | MLS1          |
| YLR095C                                          | IOC2          | YFR031C-A               | RPL2A         |
| YDR443C                                          | SSN2          | YDL160C                 | DHH1          |
| YLR095C                                          | IOC2          | YMR214W                 | SCJ1          |
| YOL121C                                          | RPS19A        | YBR280C                 | SAF1          |
| YOR308C                                          | SNU66         | YBR036C                 | CSG2          |
| YPL024W                                          | RMI1          | YDR207C                 | UME6          |
| YLR337C                                          | VRP1          | YLR381W                 | CTF3          |
| YPR036W                                          | VMA13         | YPL037C                 | EGD1          |
| YJR024C                                          | MDE1          | YGR059W                 | SPR3          |
| YKL126W                                          | YPK1          | YNL079C                 | TPM1          |
| YDR329C                                          | PEX3          | YGR077C                 | PEX8          |
| YLR090W                                          | XDJ1          | YLR370C                 | ARC18         |
| YGL054C                                          | ERV14         | YNL041C                 | COG6          |
| YPR084W                                          | YPR084W       | YKR020W                 | VPS51         |
| YMR198W                                          | CIK1          | YDR207C                 | UME6          |
| YDR334W                                          | SWR1          | YGL094C                 | PAN2          |
| YLR095C                                          | IOC2          | YDR484W                 | VPS52         |
| YGR135W                                          | PRE9          | YBL087C                 | RPL23A        |
| YKL116C                                          | PRR1          | YJR032W                 | CPR7          |

| Predictions at threshold level 0.75 continued... |               |                         |               |
|--------------------------------------------------|---------------|-------------------------|---------------|
| Gene1 of predicted pair                          |               | Gene2 of predicted pair |               |
| Systematic Name                                  | Standard Name | Systematic Name         | Standard Name |
| YNL201C                                          | PSY2          | YBL046W                 | PSY4          |
| YLR429W                                          | CRN1          | YJR135C                 | MCM22         |
| YKL010C                                          | UFD4          | YHL002W                 | HSE1          |
| YJL053W                                          | PEP8          | YOR035C                 | SHE4          |
| YER162C                                          | RAD4          | YNR032W                 | PPG1          |
| YOR132W                                          | VPS17         | YNL044W                 | YIP3          |
| YJL080C                                          | SCP160        | YOR198C                 | BFR1          |
| YML016C                                          | PPZ1          | YOL054W                 | PSH1          |
| YLR386W                                          | VAC14         | YLR441C                 | RPS1A         |
| YNL041C                                          | COG6          | YER139C                 | YER139C       |
| YJR083C                                          | ACF4          | YHR016C                 | YSC84         |
| YNL068C                                          | FKH2          | YGL163C                 | RAD54         |
| YPL112C                                          | PEX25         | YPR154W                 | PIN3          |
| YPL057C                                          | SUR1          | YNL307C                 | MCK1          |
| YKR061W                                          | KTR2          | YFR030W                 | MET10         |
| YGL124C                                          | MON1          | YLR180W                 | SAM1          |
| YPR171W                                          | BSP1          | YIL034C                 | CAP2          |
| YKL048C                                          | ELM1          | YEL053C                 | MAK10         |
| YLR083C                                          | EMP70         | YMR004W                 | MVP1          |
| YLR337C                                          | VRP1          | YJR032W                 | CPR7          |
| YDR443C                                          | SSN2          | YGL078C                 | DBP3          |
| YOR083W                                          | WHI5          | YJL006C                 | CTK2          |
| YOR290C                                          | SNF2          | YDR261C                 | EXG2          |
| YML071C                                          | COG8          | YLR309C                 | IMH1          |
| YDL116W                                          | NUP84         | YLR254C                 | NDL1          |
| YLR018C                                          | POM34         | YDR192C                 | NUP42         |
| YHL020C                                          | OPI1          | YPR119W                 | CLB2          |
| YJL176C                                          | SWI3          | YOR038C                 | HIR2          |
| YJR082C                                          | EAF6          | YNL107W                 | YAF9          |



| Predictions at threshold level 0.75 continued... |               |                         |               |
|--------------------------------------------------|---------------|-------------------------|---------------|
| Gene1 of predicted pair                          |               | Gene2 of predicted pair |               |
| Systematic Name                                  | Standard Name | Systematic Name         | Standard Name |
| YLR399C                                          | BDF1          | YDR318W                 | MCM21         |
| YNL201C                                          | PSY2          | YDR174W                 | HMO1          |
| YPR040W                                          | TIP41         | YJL187C                 | SWE1          |
| YBL047C                                          | EDE1          | YOR014W                 | RTS1          |
| YPL037C                                          | EGD1          | YGL003C                 | CDH1          |
| YDR383C                                          | NKP1          | YBR107C                 | IML3          |
| YBL058W                                          | SHP1          | YDR363W-A               | SEM1          |
| YDR320C                                          | SWA2          | YMR054W                 | STV1          |
| YDR156W                                          | RPA14         | YFR030W                 | MET10         |
| YKL126W                                          | YPK1          | YBL067C                 | UBP13         |
| YNL147W                                          | LSM7          | YNL107W                 | YAF9          |
| YKL025C                                          | PAN3          | YAL002W                 | VPS8          |
| YBR173C                                          | UMP1          | YDR484W                 | VPS52         |
| YER122C                                          | GLO3          | YNR032W                 | PPG1          |
| YJR060W                                          | CBF1          | YDR289C                 | RTT103        |
| YMR055C                                          | BUB2          | YIL103W                 | DPH1          |
| YDL059C                                          | RAD59         | YGL163C                 | RAD54         |
| YNL291C                                          | MID1          | YMR004W                 | MVP1          |
| YKL116C                                          | PRR1          | YFR036W                 | CDC26         |
| YBR111W-A                                        | SUS1          | YOR141C                 | ARP8          |
| YPL050C                                          | MNN9          | YDR310C                 | SUM1          |
| YBR194W                                          | SOY1          | YLR315W                 | NKP2          |
| YNL238W                                          | KEX2          | YOR327C                 | SNC2          |
| YDL005C                                          | MED2          | YBR010W                 | HHT1          |
| YAR064W                                          | YAR064W       | YPL240C                 | HSP82         |
| YDR080W                                          | VPS41         | YGL115W                 | SNF4          |
| YNL307C                                          | MCK1          | YHR060W                 | VMA22         |
| YOR018W                                          | ROD1          | YFR043C                 | IRC6          |
| YLR386W                                          | VAC14         | YGR054W                 | YGR054W       |

| Predictions at threshold level 0.75 continued... |               |                         |               |
|--------------------------------------------------|---------------|-------------------------|---------------|
| Gene1 of predicted pair                          |               | Gene2 of predicted pair |               |
| Systematic Name                                  | Standard Name | Systematic Name         | Standard Name |
| YBR274W                                          | CHK1          | YLR350W                 | ORM2          |
| YHR124W                                          | NDT80         | YJL106W                 | IME2          |
| YNL238W                                          | KEX2          | YMR230W                 | RPS10B        |
| YPL152W                                          | RRD2          | YFR030W                 | MET10         |
| YMR055C                                          | BUB2          | YGR135W                 | PRE9          |
| YFR034C                                          | PHO4          | YOL108C                 | INO4          |
| YKR057W                                          | RPS21A        | YDR363W-A               | SEM1          |
| YBR107C                                          | IML3          | YPR046W                 | MCM16         |
| YMR026C                                          | PEX12         | YBR036C                 | CSG2          |
| YKL135C                                          | APL2          | YAL030W                 | SNC1          |
| YEL056W                                          | HAT2          | YOR368W                 | RAD17         |
| YDR254W                                          | CHL4          | YHR013C                 | ARD1          |
| YMR055C                                          | BUB2          | YHR061C                 | GIC1          |
| YKR035W-A                                        | DID2          | YNL238W                 | KEX2          |
| YGL237C                                          | HAP2          | YDR310C                 | SUM1          |
| YDR443C                                          | SSN2          | YLR180W                 | SAM1          |
| YBL047C                                          | EDE1          | YPL161C                 | BEM4          |
| YDR146C                                          | SWI5          | YGL025C                 | PGD1          |
| YBR200W                                          | BEM1          | YGR054W                 | YGR054W       |
| YDL077C                                          | VAM6          | YER040W                 | GLN3          |
| YHR060W                                          | VMA22         | YMR133W                 | REC114        |
| YOR080W                                          | DIA2          | YAL055W                 | PEX22         |
| YLR386W                                          | VAC14         | YOR039W                 | CKB2          |
| YOR106W                                          | VAM3          | YMR231W                 | PEP5          |
| YHL011C                                          | PRS3          | YKL161C                 | YKL161C       |
| YJL154C                                          | VPS35         | YHR012W                 | VPS29         |
| YJL176C                                          | SWI3          | YML071C                 | COG8          |
| YBR171W                                          | SEC66         | YFR040W                 | SAP155        |
| YGL237C                                          | HAP2          | YLR233C                 | EST1          |

| Predictions at threshold level 0.75 continued... |               |                         |               |
|--------------------------------------------------|---------------|-------------------------|---------------|
| Gene1 of predicted pair                          |               | Gene2 of predicted pair |               |
| Systematic Name                                  | Standard Name | Systematic Name         | Standard Name |
| YOR270C                                          | VPH1          | YDR261C                 | EXG2          |
| YMR026C                                          | PEX12         | YMR214W                 | SCJ1          |
| YLR381W                                          | CTF3          | YOL081W                 | IRA2          |
| YFR036W                                          | CDC26         | YDR318W                 | MCM21         |
| YMR116C                                          | ASC1          | YBR131W                 | CCZ1          |
| YER116C                                          | SLX8          | YKL048C                 | ELM1          |
| YLR192C                                          | HCR1          | YIL071C                 | PCI8          |
| YMR026C                                          | PEX12         | YNL087W                 | TCB2          |
| YLR176C                                          | RFX1          | YGR252W                 | GCN5          |
| YJR135C                                          | MCM22         | YDR144C                 | MKC7          |
| YMR242C                                          | RPL20A        | YGL246C                 | RAI1          |
| YNL094W                                          | APP1          | YJL004C                 | SYS1          |
| YLR102C                                          | APC9          | YMR199W                 | CLN1          |
| YIL008W                                          | URM1          | YHL002W                 | HSE1          |
| YOR112W                                          | CEX1          | YGL054C                 | ERV14         |
| YDR080W                                          | VPS41         | YLR396C                 | VPS33         |
| YGL151W                                          | NUT1          | YGL253W                 | HXK2          |
| YKL126W                                          | YPK1          | YLR320W                 | MMS22         |
| YLR018C                                          | POM34         | YJR059W                 | PTK2          |
| YFR010W                                          | UBP6          | YOR014W                 | RTS1          |
| YBR171W                                          | SEC66         | YDR155C                 | CPR1          |
| YMR172W                                          | HOT1          | YGR019W                 | UGA1          |
| YOR270C                                          | VPH1          | YHR060W                 | VMA22         |
| YNL076W                                          | MKS1          | YER122C                 | GLO3          |
| YJL053W                                          | PEP8          | YDL006W                 | PTC1          |
| YEL065W                                          | SIT1          | YML071C                 | COG8          |
| YMR199W                                          | CLN1          | YDR363W-A               | SEM1          |
| YLL039C                                          | UBI4          | YDL192W                 | ARF1          |
| YBL058W                                          | SHP1          | YMR026C                 | PEX12         |

| Predictions at threshold level 0.75 continued... |               |                         |               |
|--------------------------------------------------|---------------|-------------------------|---------------|
| Gene1 of predicted pair                          |               | Gene2 of predicted pair |               |
| Systematic Name                                  | Standard Name | Systematic Name         | Standard Name |
| YOR076C                                          | SKI7          | YDL020C                 | RPN4          |
| YML103C                                          | NUP188        | YGL100W                 | SEH1          |
| YEL050C                                          | RML2          | YDR363W-A               | SEM1          |
| YDR137W                                          | RGP1          | YOR327C                 | SNC2          |
| YCL011C                                          | GBP2          | YHR167W                 | THP2          |
| YJL136C                                          | RPS21B        | YPL256C                 | CLN2          |
| YFL023W                                          | BUD27         | YJR084W                 | CSN12         |
| YMR016C                                          | SOK2          | YNL238W                 | KEX2          |
| YPL037C                                          | EGD1          | YOR043W                 | WHI2          |
| YPL001W                                          | HAT1          | YPR120C                 | CLB5          |
| YGR019W                                          | UGA1          | YLR234W                 | TOP3          |
| YBL067C                                          | UBP13         | YBL072C                 | RPS8A         |
| YER116C                                          | SLX8          | YDR261C                 | EXG2          |
| YOR112W                                          | CEX1          | YJR060W                 | CBF1          |
| YNL079C                                          | TPM1          | YHR108W                 | GGA2          |
| YGR261C                                          | APL6          | YOL018C                 | TLG2          |
| YKL032C                                          | IXR1          | YGL163C                 | RAD54         |
| YOR337W                                          | TEA1          | YJR056C                 | YJR056C       |
| YNL087W                                          | TCB2          | YBL025W                 | RRN10         |
| YOR127W                                          | RGA1          | YPL234C                 | TFP3          |
| YDL052C                                          | SLC1          | YMR152W                 | YIM1          |
| YLR135W                                          | SLX4          | YLR410W                 | VIP1          |
| YDL127W                                          | PCL2          | YKL032C                 | IXR1          |
| YML016C                                          | PPZ1          | YDL185W                 | TFP1          |
| YDR379W                                          | RGA2          | YPL256C                 | CLN2          |
| YMR153W                                          | NUP53         | YER122C                 | GLO3          |
| YJR140C                                          | HIR3          | YDR137W                 | RGP1          |
| YBL058W                                          | SHP1          | YER044C                 | ERG28         |
| YLR381W                                          | CTF3          | YLR182W                 | SWI6          |

| Predictions at threshold level 0.75 continued... |               |                         |               |
|--------------------------------------------------|---------------|-------------------------|---------------|
| Gene1 of predicted pair                          |               | Gene2 of predicted pair |               |
| Systematic Name                                  | Standard Name | Systematic Name         | Standard Name |
| YDR295C                                          | HDA2          | YLR131C                 | ACE2          |
| YOR066W                                          | MSA1          | YER162C                 | RAD4          |
| YBR171W                                          | SEC66         | YJR135C                 | MCM22         |
| YBR057C                                          | MUM2          | YER116C                 | SLX8          |
| YML115C                                          | VAN1          | YEL027W                 | CUP5          |
| YBL003C                                          | HTA2          | YBR111W-A               | SUS1          |
| YJR140C                                          | HIR3          | YOR368W                 | RAD17         |
| YDR245W                                          | MNN10         | YOR312C                 | RPL20B        |
| YMR167W                                          | MLH1          | YDR310C                 | SUM1          |
| YOR308C                                          | SNU66         | YMR038C                 | CCS1          |
| YCL067C                                          | HMLALPHA2     | YAL040C                 | CLN3          |
| YLR309C                                          | IMH1          | YPR032W                 | SRO7          |
| YIL034C                                          | CAP2          | YOR127W                 | RGA1          |
| YLR313C                                          | SPH1          | YCR086W                 | CSM1          |
| YFL023W                                          | BUD27         | YOR368W                 | RAD17         |
| YDR378C                                          | LSM6          | YIR005W                 | IST3          |
| YOR327C                                          | SNC2          | YMR017W                 | SPO20         |
| YDR254W                                          | CHL4          | YIL008W                 | URM1          |
| YHR079C                                          | IRE1          | YDR225W                 | HTA1          |
| YLR360W                                          | VPS38         | YMR055C                 | BUB2          |
| YBR278W                                          | DPB3          | YPR120C                 | CLB5          |
| YJL172W                                          | CPS1          | YJR032W                 | CPR7          |
| YPL161C                                          | BEM4          | YPL213W                 | LEA1          |
| YJR032W                                          | CPR7          | YLR093C                 | NYV1          |
| YMR216C                                          | SKY1          | YPR051W                 | MAK3          |
| YGL133W                                          | ITC1          | YDR379W                 | RGA2          |
| YNL248C                                          | RPA49         | YFR030W                 | MET10         |
| YDR129C                                          | SAC6          | YEL044W                 | IES6          |
| YOR290C                                          | SNF2          | YNL031C                 | HHT2          |

| Predictions at threshold level 0.75 continued... |               |                         |               |
|--------------------------------------------------|---------------|-------------------------|---------------|
| Gene1 of predicted pair                          |               | Gene2 of predicted pair |               |
| Systematic Name                                  | Standard Name | Systematic Name         | Standard Name |
| YNL307C                                          | MCK1          | YGL163C                 | RAD54         |
| YLR085C                                          | ARP6          | YBR089C-A               | NHP6B         |
| YLR360W                                          | VPS38         | YOL018C                 | TLG2          |
| YMR095C                                          | SNO1          | YOR066W                 | MSA1          |
| YML115C                                          | VAN1          | YDR261C                 | EXG2          |
| YPL240C                                          | HSP82         | YNL220W                 | ADE12         |
| YGR108W                                          | CLB1          | YLR410W                 | VIP1          |
| YMR109W                                          | MYO5          | YDL155W                 | CLB3          |
| YPR036W                                          | VMA13         | YMR152W                 | YIM1          |
| YDR477W                                          | SNF1          | YLR398C                 | SKI2          |
| YNR052C                                          | POP2          | YDR207C                 | UME6          |
| YDR254W                                          | CHL4          | YEL053C                 | MAK10         |
| YNL106C                                          | INP52         | YOL054W                 | PSH1          |
| YER179W                                          | DMC1          | YCL014W                 | BUD3          |
| YML117W                                          | NAB6          | YDL006W                 | PTC1          |
| YJL190C                                          | RPS22A        | YHL002W                 | HSE1          |
| YGL100W                                          | SEH1          | YNL076W                 | MKS1          |
| YPR084W                                          | YPR084W       | YPR032W                 | SRO7          |
| YLR315W                                          | NKP2          | YGL252C                 | RTG2          |
| YDR507C                                          | GIN4          | YML095C                 | RAD10         |
| YLR227C                                          | ADY4          | YOL091W                 | SPO21         |
| YPL161C                                          | BEM4          | YPL195W                 | APL5          |
| YHR156C                                          | LIN1          | YJR032W                 | CPR7          |
| YAL024C                                          | LTE1          | YMR214W                 | SCJ1          |
| YPR046W                                          | MCM16         | YMR152W                 | YIM1          |
| YLR095C                                          | IOC2          | YPR030W                 | CSR2          |
| YDL154W                                          | MSH5          | YLR394W                 | CST9          |
| YPL024W                                          | RMI1          | YDR254W                 | CHL4          |
| YBL103C                                          | RTG3          | YEL060C                 | PRB1          |

| Predictions at threshold level 0.75 continued... |               |                         |               |
|--------------------------------------------------|---------------|-------------------------|---------------|
| Gene1 of predicted pair                          |               | Gene2 of predicted pair |               |
| Systematic Name                                  | Standard Name | Systematic Name         | Standard Name |
| YDL184C                                          | RPL41A        | YNL058C                 | YNL058C       |
| YNL307C                                          | MCK1          | YNL225C                 | CNM67         |
| YLR360W                                          | VPS38         | YOR132W                 | VPS17         |
| YPL042C                                          | SSN3          | YPL248C                 | GAL4          |
| YDR448W                                          | ADA2          | YCL010C                 | SGF29         |
| YBL103C                                          | RTG3          | YDR207C                 | UME6          |
| YGR072W                                          | UPF3          | YPL037C                 | EGD1          |
| YNL004W                                          | HRB1          | YHR167W                 | THP2          |
| YOR132W                                          | VPS17         | YDR153C                 | ENT5          |
| YGR054W                                          | YGR054W       | YJL183W                 | MNN11         |
| YMR095C                                          | SNO1          | YKR099W                 | BAS1          |
| YOR112W                                          | CEX1          | YLR309C                 | IMH1          |
| YPR018W                                          | RLF2          | YBR107C                 | IML3          |
| YGR270W                                          | YTA7          | YOR141C                 | ARP8          |
| YBR127C                                          | VMA2          | YJR033C                 | RAV1          |
| YKL073W                                          | LHS1          | YMR022W                 | UBC7          |
| YLR090W                                          | XDJ1          | YBR171W                 | SEC66         |
| YNL297C                                          | MON2          | YNL044W                 | YIP3          |
| YKL110C                                          | KTI12         | YOR141C                 | ARP8          |
| YFR036W                                          | CDC26         | YCR086W                 | CSM1          |
| YMR224C                                          | MRE11         | YOR290C                 | SNF2          |
| YDR156W                                          | RPA14         | YJR063W                 | RPA12         |
| YJR040W                                          | GEF1          | YHL020C                 | OPI1          |
| YLR254C                                          | NDL1          | YHR115C                 | DMA1          |
| YNL032W                                          | SIW14         | YLR441C                 | RPS1A         |
| YFR010W                                          | UBP6          | YER162C                 | RAD4          |
| YHR156C                                          | LIN1          | YPL161C                 | BEM4          |
| YMR133W                                          | REC114        | YLR370C                 | ARC18         |
| YLR410W                                          | VIP1          | YIR005W                 | IST3          |

| Predictions at threshold level 0.75 continued... |               |                         |               |
|--------------------------------------------------|---------------|-------------------------|---------------|
| Gene1 of predicted pair                          |               | Gene2 of predicted pair |               |
| Systematic Name                                  | Standard Name | Systematic Name         | Standard Name |
| YLR386W                                          | VAC14         | YML001W                 | YPT7          |
| YPL057C                                          | SUR1          | YER122C                 | GLO3          |
| YIL008W                                          | URM1          | YCR086W                 | CSM1          |
| YKR061W                                          | KTR2          | YNL107W                 | YAF9          |
| YOR127W                                          | RGA1          | YNR032W                 | PPG1          |
| YBL003C                                          | HTA2          | YGR252W                 | GCN5          |
| YJL183W                                          | MNN11         | YDR310C                 | SUM1          |
| YOR033C                                          | EXO1          | YPR046W                 | MCM16         |
| YKL048C                                          | ELM1          | YHR111W                 | UBA4          |
| YNL199C                                          | GCR2          | YBL079W                 | NUP170        |
| YPR040W                                          | TIP41         | YKR048C                 | NAP1          |
| YNL201C                                          | PSY2          | YKL110C                 | KTI12         |
| YMR284W                                          | YKU70         | YBR082C                 | UBC4          |
| YDR293C                                          | SSD1          | YLR234W                 | TOP3          |
| YFR036W                                          | CDC26         | YGR188C                 | BUB1          |
| YOR127W                                          | RGA1          | YOL067C                 | RTG1          |
| YDR103W                                          | STE5          | YDR480W                 | DIG2          |
| YBR194W                                          | SOY1          | YDR440W                 | DOT1          |
| YOR290C                                          | SNF2          | YBR036C                 | CSG2          |
| YOR358W                                          | HAP5          | YLR233C                 | EST1          |
| YKL126W                                          | YPK1          | YDL077C                 | VAM6          |
| YML115C                                          | VAN1          | YOR290C                 | SNF2          |
| YNL307C                                          | MCK1          | YOR141C                 | ARP8          |
| YGR249W                                          | MGA1          | YER040W                 | GLN3          |
| YIR005W                                          | IST3          | YDR440W                 | DOT1          |
| YDR245W                                          | MNN10         | YKL213C                 | DOA1          |
| YIL007C                                          | NAS2          | YLR024C                 | UBR2          |
| YDR320C                                          | SWA2          | YLR206W                 | ENT2          |
| YLR109W                                          | AHP1          | YPR167C                 | MET16         |



| Predictions at threshold level 0.75 continued... |               |                         |               |
|--------------------------------------------------|---------------|-------------------------|---------------|
| Gene1 of predicted pair                          |               | Gene2 of predicted pair |               |
| Systematic Name                                  | Standard Name | Systematic Name         | Standard Name |
| YDL059C                                          | RAD59         | YDR207C                 | UME6          |
| YKR061W                                          | KTR2          | YKL110C                 | KTI12         |
| YKL139W                                          | CTK1          | YLR350W                 | ORM2          |
| YDR261C                                          | EXG2          | YEL060C                 | PRB1          |
| YBL003C                                          | HTA2          | YBR010W                 | HHT1          |
| YGR241C                                          | YAP1802       | YDR484W                 | VPS52         |
| YBR290W                                          | BSD2          | YBR108W                 | YBR108W       |
| YOR069W                                          | VPS5          | YOR109W                 | INP53         |
| YNL106C                                          | INP52         | YHR077C                 | NMD2          |
| YOR083W                                          | WHI5          | YGL025C                 | PGD1          |
| YNL215W                                          | IES2          | YHR178W                 | STB5          |
| YGL087C                                          | MMS2          | YKL101W                 | HSL1          |
| YDR137W                                          | RGP1          | YMR230W                 | RPS10B        |
| YMR095C                                          | SNO1          | YNL076W                 | MKS1          |
| YPL037C                                          | EGD1          | YBR280C                 | SAF1          |
| YNL288W                                          | CAF40         | YAR014C                 | BUD14         |
| YGR041W                                          | BUD9          | YLR353W                 | BUD8          |
| YPR052C                                          | NHP6A         | YML062C                 | MFT1          |
| YLR058C                                          | SHM2          | YKL114C                 | APN1          |
| YDR108W                                          | GSG1          | YLR309C                 | IMH1          |
| YPR131C                                          | NAT3          | YJL006C                 | CTK2          |
| YIL076W                                          | SEC28         | YDR440W                 | DOT1          |

Predicted pairs at a threshold level of 0.80

| Predictions at threshold level 0.80 |               |                         |               |
|-------------------------------------|---------------|-------------------------|---------------|
| Gene1 of predicted pair             |               | Gene2 of predicted pair |               |
| Systematic Name                     | Standard Name | Systematic Name         | Standard Name |
| YGL025C                             | PGD1          | YJR032W                 | CPR7          |
| YNL199C                             | GCR2          | YGR059W                 | SPR3          |
| YLR377C                             | FBP1          | YDR028C                 | REG1          |
| YDL116W                             | NUP84         | YNL236W                 | SIN4          |
| YNL054W                             | VAC7          | YDR378C                 | LSM6          |
| YKL038W                             | RGT1          | YOR047C                 | STD1          |
| YGR108W                             | CLB1          | YDL155W                 | CLB3          |
| YJL136C                             | RPS21B        | YJL095W                 | BCK1          |
| YMR095C                             | SNO1          | YNL032W                 | SIW14         |
| YLR435W                             | TSR2          | YGL019W                 | CKB1          |
| YHR111W                             | UBA4          | YGR270W                 | YTA7          |
| YBL102W                             | SFT2          | YJR040W                 | GEF1          |
| YBL008W                             | HIR1          | YML115C                 | VAN1          |
| YNR072W                             | HXT17         | YLR180W                 | SAM1          |
| YCR081W                             | SRB8          | YMR311C                 | GLC8          |
| YLR094C                             | GIS3          | YPL137C                 | GIP3          |
| YOR275C                             | RIM20         | YLR320W                 | MMS22         |
| YOR043W                             | WHI2          | YDL077C                 | VAM6          |
| YJL183W                             | MNN11         | YKL119C                 | VPH2          |
| YHR056C                             | RSC30         | YPR119W                 | CLB2          |
| YGR014W                             | MSB2          | YKL041W                 | VPS24         |
| YEL027W                             | CUP5          | YHR039C-A               | VMA10         |
| YBR131W                             | CCZ1          | YBR041W                 | FAT1          |
| YFR031C-A                           | RPL2A         | YHR081W                 | LRP1          |
| YFR036W                             | CDC26         | YNL107W                 | YAF9          |
| YDR137W                             | RGP1          | YOR038C                 | HIR2          |
| YOR358W                             | HAP5          | YAL002W                 | VPS8          |
| YBL051C                             | PIN4          | YDR183W                 | PLP1          |

| Predictions at threshold level 0.80 continued... |               |                         |               |
|--------------------------------------------------|---------------|-------------------------|---------------|
| Gene1 of predicted pair                          |               | Gene2 of predicted pair |               |
| Systematic Name                                  | Standard Name | Systematic Name         | Standard Name |
| YBL102W                                          | SFT2          | YNL291C                 | MID1          |
| YMR109W                                          | MYO5          | YLR233C                 | EST1          |
| YCR077C                                          | PAT1          | YGR188C                 | BUB1          |
| YER161C                                          | SPT2          | YDR440W                 | DOT1          |
| YMR080C                                          | NAM7          | YHR077C                 | NMD2          |
| YLR043C                                          | TRX1          | YDR423C                 | CAD1          |
| YDR456W                                          | NHX1          | YNL199C                 | GCR2          |
| YPL057C                                          | SUR1          | YBR019C                 | GAL10         |
| YDL161W                                          | ENT1          | YNR006W                 | VPS27         |
| YLR288C                                          | MEC3          | YML016C                 | PPZ1          |
| YLR018C                                          | POM34         | YDR207C                 | UME6          |
| YGL003C                                          | CDH1          | YMR214W                 | SCJ1          |
| YOR080W                                          | DIA2          | YDL047W                 | SIT4          |
| YMR205C                                          | PFK2          | YKR020W                 | VPS51         |
| YMR284W                                          | YKU70         | YER116C                 | SLX8          |
| YKR001C                                          | VPS1          | YLR182W                 | SWI6          |
| YHR108W                                          | GGA2          | YDL192W                 | ARF1          |
| YBR009C                                          | HHF1          | YOR064C                 | YNG1          |
| YOR270C                                          | VPH1          | YNL307C                 | MCK1          |
| YNL054W                                          | VAC7          | YJR060W                 | CBF1          |
| YPR072W                                          | NOT5          | YJR063W                 | RPA12         |
| YLR292C                                          | SEC72         | YOR023C                 | AHC1          |
| YDR443C                                          | SSN2          | YBR019C                 | GAL10         |
| YDR507C                                          | GIN4          | YOR327C                 | SNC2          |
| YJL187C                                          | SWE1          | YCR086W                 | CSM1          |
| YLR360W                                          | VPS38         | YLR079W                 | SIC1          |
| YJL154C                                          | VPS35         | YDL192W                 | ARF1          |
| YGL163C                                          | RAD54         | YOR038C                 | HIR2          |
| YLR234W                                          | TOP3          | YNL206C                 | RTT106        |

| Predictions at threshold level 0.80 continued... |               |                         |               |
|--------------------------------------------------|---------------|-------------------------|---------------|
| Gene1 of predicted pair                          |               | Gene2 of predicted pair |               |
| Systematic Name                                  | Standard Name | Systematic Name         | Standard Name |
| YBR258C                                          | SHG1          | YGL237C                 | HAP2          |
| YPL178W                                          | CBC2          | YKL068W                 | NUP100        |
| YGR071C                                          | YGR071C       | YGR188C                 | BUB1          |
| YLR386W                                          | VAC14         | YER116C                 | SLX8          |
| YBR042C                                          | CST26         | YDR358W                 | GGA1          |
| YBL079W                                          | NUP170        | YKR024C                 | DBP7          |
| YLR216C                                          | CPR6          | YFR036W                 | CDC26         |
| YHR056C                                          | RSC30         | YKL113C                 | RAD27         |
| YBR107C                                          | IML3          | YNL147W                 | LSM7          |
| YPR120C                                          | CLB5          | YLR315W                 | NKP2          |
| YBR173C                                          | UMP1          | YGL115W                 | SNF4          |
| YBR042C                                          | CST26         | YDR137W                 | RGP1          |
| YGR070W                                          | ROM1          | YOL081W                 | IRA2          |
| YEL065W                                          | SIT1          | YEL060C                 | PRB1          |
| YDR129C                                          | SAC6          | YDR310C                 | SUM1          |
| YMR198W                                          | CIK1          | YPL180W                 | TCO89         |
| YGL208W                                          | SIP2          | YJL187C                 | SWE1          |
| YBL103C                                          | RTG3          | YER040W                 | GLN3          |
| YOR270C                                          | VPH1          | YBR171W                 | SEC66         |
| YGL033W                                          | HOP2          | YDL192W                 | ARF1          |
| YOR337W                                          | TEA1          | YJL095W                 | BCK1          |
| YJR063W                                          | RPA12         | YOR064C                 | YNG1          |
| YGR261C                                          | APL6          | YJL053W                 | PEP8          |
| YGL025C                                          | PGD1          | YOR327C                 | SNC2          |
| YJL124C                                          | LSM1          | YBL047C                 | EDE1          |
| YBR200W                                          | BEM1          | YBL021C                 | HAP3          |
| YJL006C                                          | CTK2          | YLR182W                 | SWI6          |
| YDR335W                                          | MSN5          | YDR318W                 | MCM21         |
| YPL105C                                          | YPL105C       | YOR327C                 | SNC2          |

| Predictions at threshold level 0.80 continued... |               |                         |               |
|--------------------------------------------------|---------------|-------------------------|---------------|
| Gene1 of predicted pair                          |               | Gene2 of predicted pair |               |
| Systematic Name                                  | Standard Name | Systematic Name         | Standard Name |
| YOR080W                                          | DIA2          | YJR135C                 | MCM22         |
| YDR320C                                          | SWA2          | YGR105W                 | VMA21         |
| YDL020C                                          | RPN4          | YGR270W                 | YTA7          |
| YPL024W                                          | RMI1          | YPR036W                 | VMA13         |
| YBR274W                                          | CHK1          | YGR188C                 | BUB1          |
| YFR031C-A                                        | RPL2A         | YAL002W                 | VPS8          |
| YDR012W                                          | RPL4B         | YOR078W                 | BUD21         |
| YOR127W                                          | RGA1          | YML001W                 | YPT7          |
| YDR260C                                          | SWM1          | YGR135W                 | PRE9          |
| YNL236W                                          | SIN4          | YER068W                 | MOT2          |
| YKL126W                                          | YPK1          | YGL212W                 | VAM7          |
| YOL018C                                          | TLG2          | YOR036W                 | PEP12         |
| YDR383C                                          | NKP1          | YJL006C                 | CTK2          |
| YNR052C                                          | POP2          | YLR315W                 | NKP2          |
| YER116C                                          | SLX8          | YPL037C                 | EGD1          |
| YLR079W                                          | SIC1          | YNL116W                 | DMA2          |
| YER044C                                          | ERG28         | YOR035C                 | SHE4          |
| YOR290C                                          | SNF2          | YBR019C                 | GAL10         |
| YDL223C                                          | HBT1          | YML071C                 | COG8          |
| YPR017C                                          | DSS4          | YKR001C                 | VPS1          |
| YPL042C                                          | SSN3          | YOR038C                 | HIR2          |
| YNR072W                                          | HXT17         | YDL192W                 | ARF1          |
| YCR020C-A                                        | MAK31         | YNL238W                 | KEX2          |
| YBR194W                                          | SOY1          | YJL183W                 | MNN11         |
| YPL024W                                          | RMI1          | YDR358W                 | GGA1          |
| YDL020C                                          | RPN4          | YAL002W                 | VPS8          |
| YDR320C                                          | SWA2          | YCR066W                 | RAD18         |
| YBR173C                                          | UMP1          | YOR368W                 | RAD17         |
| YHL020C                                          | OPI1          | YNR032W                 | PPG1          |

| Predictions at threshold level 0.80 continued... |               |                         |               |
|--------------------------------------------------|---------------|-------------------------|---------------|
| Gene1 of predicted pair                          |               | Gene2 of predicted pair |               |
| Systematic Name                                  | Standard Name | Systematic Name         | Standard Name |
| YBR030W                                          | YBR030W       | YOL121C                 | RPS19A        |
| YNL238W                                          | KEX2          | YHR108W                 | GGA2          |
| YDL013W                                          | SLX5          | YDL155W                 | CLB3          |
| YPL137C                                          | GIP3          | YER162C                 | RAD4          |
| YPL050C                                          | MNN9          | YCR088W                 | ABP1          |
| YER110C                                          | KAP123        | YPL246C                 | RBD2          |
| YJL117W                                          | PHO86         | YPL089C                 | RLM1          |
| YOL067C                                          | RTG1          | YAR014C                 | BUD14         |
| YOR039W                                          | CKB2          | YCR031C                 | RPS14A        |
| YML095C                                          | RAD10         | YDR318W                 | MCM21         |
| YNL054W                                          | VAC7          | YNL248C                 | RPA49         |
| YIL076W                                          | SEC28         | YDR320C                 | SWA2          |
| YLR240W                                          | VPS34         | YMR202W                 | ERG2          |
| YOR132W                                          | VPS17         | YPL234C                 | TFP3          |
| YBR017C                                          | KAP104        | YKL057C                 | NUP120        |
| YCL001W                                          | RER1          | YHR012W                 | VPS29         |
| YDR310C                                          | SUM1          | YNR032W                 | PPG1          |
| YMR224C                                          | MRE11         | YKR020W                 | VPS51         |
| YNL087W                                          | TCB2          | YER040W                 | GLN3          |
| YPL042C                                          | SSN3          | YPL057C                 | SUR1          |
| YDL127W                                          | PCL2          | YDR289C                 | RTT103        |
| YML103C                                          | NUP188        | YPL018W                 | CTF19         |
| YIL053W                                          | RHR2          | YPL195W                 | APL5          |
| YBL078C                                          | ATG8          | YBR131W                 | CCZ1          |
| YDL065C                                          | PEX19         | YGL153W                 | PEX14         |
| YOL051W                                          | GAL11         | YBR010W                 | HHT1          |
| YIL036W                                          | CST6          | YLR399C                 | BDF1          |
| YER161C                                          | SPT2          | YDR310C                 | SUM1          |
| YMR199W                                          | CLN1          | YPR119W                 | CLB2          |

| Predictions at threshold level 0.80 continued... |               |                         |               |
|--------------------------------------------------|---------------|-------------------------|---------------|
| Gene1 of predicted pair                          |               | Gene2 of predicted pair |               |
| Systematic Name                                  | Standard Name | Systematic Name         | Standard Name |
| YMR167W                                          | MLH1          | YPR119W                 | CLB2          |
| YNL054W                                          | VAC7          | YMR055C                 | BUB2          |
| YNL087W                                          | TCB2          | YJR084W                 | CSN12         |
| YOL121C                                          | RPS19A        | YOR035C                 | SHE4          |
| YBR111W-A                                        | SUS1          | YLR399C                 | BDF1          |
| YLR386W                                          | VAC14         | YGL212W                 | VAM7          |
| YMR284W                                          | YKU70         | YLR313C                 | SPH1          |
| YOR109W                                          | INP53         | YDR207C                 | UME6          |
| YNL032W                                          | SIW14         | YMR016C                 | SOK2          |
| YGL133W                                          | ITC1          | YLR102C                 | APC9          |
| YMR224C                                          | MRE11         | YOR312C                 | RPL20B        |
| YHR039C-A                                        | VMA10         | YDL083C                 | RPS16B        |
| YPL105C                                          | YPL105C       | YNL051W                 | COG5          |
| YDR378C                                          | LSM6          | YGL003C                 | CDH1          |
| YMR273C                                          | ZDS1          | YML057W                 | CMP2          |
| YMR172W                                          | HOT1          | YNL288W                 | CAF40         |
| YKR020W                                          | VPS51         | YNL289W                 | PCL1          |
| YJR032W                                          | CPR7          | YOL018C                 | TLG2          |
| YKR099W                                          | BAS1          | YMR311C                 | GLC8          |
| YGL163C                                          | RAD54         | YHR115C                 | DMA1          |
| YDL155W                                          | CLB3          | YPL018W                 | CTF19         |
| YML099C                                          | ARG81         | YDR207C                 | UME6          |
| YGL212W                                          | VAM7          | YCL001W                 | RER1          |
| YKL032C                                          | IXR1          | YNL116W                 | DMA2          |
| YMR055C                                          | BUB2          | YPL152W                 | RRD2          |
| YDR440W                                          | DOT1          | YGL003C                 | CDH1          |
| YJR135C                                          | MCM22         | YER122C                 | GLO3          |
| YNL032W                                          | SIW14         | YPL057C                 | SUR1          |
| YDR225W                                          | HTA1          | YBL003C                 | HTA2          |

| Predictions at threshold level 0.80 continued... |               |                         |               |
|--------------------------------------------------|---------------|-------------------------|---------------|
| Gene1 of predicted pair                          |               | Gene2 of predicted pair |               |
| Systematic Name                                  | Standard Name | Systematic Name         | Standard Name |
| YKR035W-A                                        | DID2          | YEL060C                 | PRB1          |
| YGL115W                                          | SNF4          | YOL091W                 | SPO21         |
| YMR224C                                          | MRE11         | YKL126W                 | YPK1          |
| YLR381W                                          | CTF3          | YNL166C                 | BNI5          |
| YHR119W                                          | SET1          | YBR175W                 | SWD3          |
| YBR030W                                          | YBR030W       | YMR152W                 | YIM1          |
| YFR031C-A                                        | RPL2A         | YFR010W                 | UBP6          |
| YER115C                                          | SPR6          | YMR273C                 | ZDS1          |
| YCR020C-A                                        | MAK31         | YOR069W                 | VPS5          |
| YLR337C                                          | VRP1          | YGL124C                 | MON1          |
| YDL161W                                          | ENT1          | YJR125C                 | ENT3          |
| YMR016C                                          | SOK2          | YLR370C                 | ARC18         |
| YEL065W                                          | SIT1          | YFR036W                 | CDC26         |
| YMR199W                                          | CLN1          | YBL087C                 | RPL23A        |
| YMR116C                                          | ASC1          | YGL153W                 | PEX14         |
| YDR080W                                          | VPS41         | YHR012W                 | VPS29         |
| YDR156W                                          | RPA14         | YOR275C                 | RIM20         |
| YDR004W                                          | RAD57         | YFR036W                 | CDC26         |
| YML038C                                          | YMD8          | YDR153C                 | ENT5          |
| YLR095C                                          | IOC2          | YDR310C                 | SUM1          |
| YLR079W                                          | SIC1          | YOR195W                 | SLK19         |
| YGR184C                                          | UBR1          | YDL013W                 | SLX5          |
| YDR395W                                          | SXM1          | YKL068W                 | NUP100        |
| YPR131C                                          | NAT3          | YDR192C                 | NUP42         |
| YIL159W                                          | BNR1          | YOR337W                 | TEA1          |
| YPL253C                                          | VIK1          | YHR115C                 | DMA1          |
| YER114C                                          | BOI2          | YHR061C                 | GIC1          |
| YDR320C                                          | SWA2          | YJR040W                 | GEF1          |
| YLR094C                                          | GIS3          | YGL003C                 | CDH1          |



| Predictions at threshold level 0.80 continued... |               |                         |               |
|--------------------------------------------------|---------------|-------------------------|---------------|
| Gene1 of predicted pair                          |               | Gene2 of predicted pair |               |
| Systematic Name                                  | Standard Name | Systematic Name         | Standard Name |
| YFL047W                                          | RGD2          | YPL246C                 | RBD2          |
| YHR039C-A                                        | VMA10         | YDR207C                 | UME6          |
| YJL006C                                          | CTK2          | YOR141C                 | ARP8          |
| YGL078C                                          | DBP3          | YEL060C                 | PRB1          |
| YGR020C                                          | VMA7          | YER162C                 | RAD4          |
| YFR030W                                          | MET10         | YJL006C                 | CTK2          |
| YLR079W                                          | SIC1          | YMR199W                 | CLN1          |
| YER116C                                          | SLX8          | YLR093C                 | NYV1          |
| YJR056C                                          | YJR056C       | YGL003C                 | CDH1          |
| YPL046C                                          | ELC1          | YNL230C                 | ELA1          |
| YLR423C                                          | ATG17         | YPR119W                 | CLB2          |
| YMR125W                                          | STO1          | YML057W                 | CMP2          |
| YDL020C                                          | RPN4          | YOR358W                 | HAP5          |
| YDL192W                                          | ARF1          | YEL042W                 | GDA1          |
| YHR052W                                          | CIC1          | YLR325C                 | RPL38         |
| YOR195W                                          | SLK19         | YMR055C                 | BUB2          |
| YPL105C                                          | YPL105C       | YLR309C                 | IMH1          |
| YLR119W                                          | SRN2          | YNL058C                 | YNL058C       |
| YJL138C                                          | TIF2          | YDR310C                 | SUM1          |
| YOR127W                                          | RGA1          | YDR144C                 | MKC7          |
| YIL103W                                          | DPH1          | YGR188C                 | BUB1          |
| YDL116W                                          | NUP84         | YLR313C                 | SPH1          |
| YNR052C                                          | POP2          | YMR038C                 | CCS1          |
| YBR036C                                          | CSG2          | YMR230W                 | RPS10B        |
| YMR095C                                          | SNO1          | YER040W                 | GLN3          |
| YPR030W                                          | CSR2          | YDR358W                 | GGA1          |
| YMR224C                                          | MRE11         | YGL252C                 | RTG2          |
| YBR171W                                          | SEC66         | YHR200W                 | RPN10         |
| YLR381W                                          | CTF3          | YJR060W                 | CBF1          |

| Predictions at threshold level 0.80 continued... |               |                         |               |
|--------------------------------------------------|---------------|-------------------------|---------------|
| Gene1 of predicted pair                          |               | Gene2 of predicted pair |               |
| Systematic Name                                  | Standard Name | Systematic Name         | Standard Name |
| YBR164C                                          | ARL1          | YEL022W                 | GEA2          |
| YDR477W                                          | SNF1          | YBR171W                 | SEC66         |
| YLR399C                                          | BDF1          | YML112W                 | CTK3          |
| YFR031C-A                                        | RPL2A         | YFL023W                 | BUD27         |
| YDR363W-A                                        | SEM1          | YGR188C                 | BUB1          |
| YCR066W                                          | RAD18         | YAL015C                 | NTG1          |
| YOR127W                                          | RGA1          | YML095C                 | RAD10         |
| YBR057C                                          | MUM2          | YEL036C                 | ANP1          |
| YOR290C                                          | SNF2          | YKL109W                 | HAP4          |
| YBL051C                                          | PIN4          | YLR447C                 | VMA6          |
| YKL101W                                          | HSL1          | YOL081W                 | IRA2          |
| YBL058W                                          | SHP1          | YMR133W                 | REC114        |
| YOR112W                                          | CEX1          | YPL037C                 | EGD1          |
| YBR030W                                          | YBR030W       | YHR039C-A               | VMA10         |
| YPR084W                                          | YPR084W       | YDR289C                 | RTT103        |
| YOR039W                                          | CKB2          | YGR252W                 | GCN5          |
| YPL147W                                          | PXA1          | YPL145C                 | KES1          |
| YOR094W                                          | ARF3          | YCL034W                 | LSB5          |
| YPR018W                                          | RLF2          | YCR086W                 | CSM1          |
| YGL212W                                          | VAM7          | YIL133C                 | RPL16A        |
| YLR381W                                          | CTF3          | YPL057C                 | SUR1          |
| YPR018W                                          | RLF2          | YDR181C                 | SAS4          |
| YMR055C                                          | BUB2          | YBR036C                 | CSG2          |
| YDL226C                                          | GCS1          | YKL114C                 | APN1          |
| YDL116W                                          | NUP84         | YDR076W                 | RAD55         |
| YCL037C                                          | SRO9          | YNL297C                 | MON2          |
| YDR443C                                          | SSN2          | YNL076W                 | MKS1          |
| YOR059C                                          | YOR059C       | YKL094W                 | YJU3          |
| YBL058W                                          | SHP1          | YNL307C                 | MCK1          |

| Predictions at threshold level 0.80 continued... |               |                         |               |
|--------------------------------------------------|---------------|-------------------------|---------------|
| Gene1 of predicted pair                          |               | Gene2 of predicted pair |               |
| Systematic Name                                  | Standard Name | Systematic Name         | Standard Name |
| YJR060W                                          | CBF1          | YDL226C                 | GCS1          |
| YPL022W                                          | RAD1          | YML095C                 | RAD10         |
| YOL111C                                          | MDY2          | YMR214W                 | SCJ1          |
| YMR055C                                          | BUB2          | YOR014W                 | RTS1          |
| YPR040W                                          | TIP41         | YOR327C                 | SNC2          |
| YGL200C                                          | EMP24         | YML012W                 | ERV25         |
| YML095C                                          | RAD10         | YJR135C                 | MCM22         |
| YER116C                                          | SLX8          | YHR010W                 | RPL27A        |
| YIL036W                                          | CST6          | YDL006W                 | PTC1          |
| YOL111C                                          | MDY2          | YDR261C                 | EXG2          |
| YBL101C                                          | ECM21         | YBL025W                 | RRN10         |
| YJR084W                                          | CSN12         | YDR310C                 | SUM1          |
| YGL124C                                          | MON1          | YCR053W                 | THR4          |
| YDR477W                                          | SNF1          | YER096W                 | SHC1          |
| YOR140W                                          | SFL1          | YDR207C                 | UME6          |
| YDR358W                                          | GGA1          | YMR214W                 | SCJ1          |
| YDL002C                                          | NHP10         | YEL013W                 | VAC8          |
| YPR018W                                          | RLF2          | YOR033C                 | EXO1          |
| YHR060W                                          | VMA22         | YNR032W                 | PPG1          |
| YKL048C                                          | ELM1          | YHR115C                 | DMA1          |
| YOL126C                                          | MDH2          | YKL117W                 | SBA1          |
| YDR101C                                          | ARX1          | YBR267W                 | REI1          |
| YNL215W                                          | IES2          | YDR254W                 | CHL4          |
| YPL037C                                          | EGD1          | YOR327C                 | SNC2          |
| YGL019W                                          | CKB1          | YLR350W                 | ORM2          |
| YKL110C                                          | KTI12         | YLR182W                 | SWI6          |
| YBL058W                                          | SHP1          | YOR035C                 | SHE4          |
| YLR043C                                          | TRX1          | YER042W                 | MXR1          |
| YNL307C                                          | MCK1          | YGR270W                 | YTA7          |

| Predictions at threshold level 0.80 continued... |               |                         |               |
|--------------------------------------------------|---------------|-------------------------|---------------|
| Gene1 of predicted pair                          |               | Gene2 of predicted pair |               |
| Systematic Name                                  | Standard Name | Systematic Name         | Standard Name |
| YKL048C                                          | ELM1          | YKR035W-A               | DID2          |
| YHR039C-A                                        | VMA10         | YOR327C                 | SNC2          |
| YHR014W                                          | SPO13         | YIL002C                 | INP51         |
| YKL048C                                          | ELM1          | YML071C                 | COG8          |
| YPL024W                                          | RMI1          | YML115C                 | VAN1          |
| YHL031C                                          | GOS1          | YDR137W                 | RGP1          |
| YDL160C                                          | DHH1          | YKR095W                 | MLP1          |
| YOR337W                                          | TEA1          | YBR171W                 | SEC66         |
| YGR249W                                          | MGA1          | YLR452C                 | SST2          |
| YNL307C                                          | MCK1          | YOR043W                 | WHI2          |
| YBR107C                                          | IML3          | YGL252C                 | RTG2          |
| YPL037C                                          | EGD1          | YBL025W                 | RRN10         |
| YPR051W                                          | MAK3          | YKL048C                 | ELM1          |
| YPL042C                                          | SSN3          | YDL002C                 | NHP10         |
| YNR072W                                          | HXT17         | YER044C                 | ERG28         |
| YNL031C                                          | HHT2          | YBL002W                 | HTB2          |
| YDR254W                                          | CHL4          | YJR060W                 | CBF1          |
| YKR048C                                          | NAP1          | YBR010W                 | HHT1          |
| YOR066W                                          | MSA1          | YNL041C                 | COG6          |
| YMR199W                                          | CLN1          | YPL161C                 | BEM4          |
| YGR071C                                          | YGR071C       | YHR167W                 | THP2          |
| YMR224C                                          | MRE11         | YJL124C                 | LSM1          |
| YER122C                                          | GLO3          | YKR030W                 | GMH1          |
| YGL178W                                          | MPT5          | YBR171W                 | SEC66         |
| YLR386W                                          | VAC14         | YEL060C                 | PRB1          |
| YMR116C                                          | ASC1          | YJL117W                 | PHO86         |
| YJL127C                                          | SPT10         | YLR410W                 | VIP1          |
| YBL047C                                          | EDE1          | YJL006C                 | CTK2          |
| YGL223C                                          | COG1          | YEL043W                 | YEL043W       |

| Predictions at threshold level 0.80 continued... |               |                         |               |
|--------------------------------------------------|---------------|-------------------------|---------------|
| Gene1 of predicted pair                          |               | Gene2 of predicted pair |               |
| Systematic Name                                  | Standard Name | Systematic Name         | Standard Name |
| YDL006W                                          | PTC1          | YOL018C                 | TLG2          |
| YGR105W                                          | VMA21         | YER122C                 | GLO3          |
| YGR019W                                          | UGA1          | YBR171W                 | SEC66         |
| YNL032W                                          | SIW14         | YER162C                 | RAD4          |
| YBL008W                                          | HIR1          | YJL176C                 | SWI3          |
| YDL020C                                          | RPN4          | YNL206C                 | RTT106        |
| YDR484W                                          | VPS52         | YOR066W                 | MSA1          |
| YCR065W                                          | HCM1          | YOL081W                 | IRA2          |
| YNL106C                                          | INP52         | YML103C                 | NUP188        |
| YOR132W                                          | VPS17         | YHL002W                 | HSE1          |
| YNL087W                                          | TCB2          | YEL060C                 | PRB1          |
| YOR043W                                          | WHI2          | YOL081W                 | IRA2          |
| YAL024C                                          | LTE1          | YPL137C                 | GIP3          |
| YLL039C                                          | UBI4          | YPL213W                 | LEA1          |
| YBR173C                                          | UMP1          | YPL137C                 | GIP3          |
| YJR140C                                          | HIR3          | YDR363W-A               | SEM1          |
| YBR114W                                          | RAD16         | YNL107W                 | YAF9          |
| YNL069C                                          | RPL16B        | YJL036W                 | SNX4          |
| YMR199W                                          | CLN1          | YKL161C                 | YKL161C       |
| YAL024C                                          | LTE1          | YPL037C                 | EGD1          |
| YNL180C                                          | RHO5          | YPL240C                 | HSP82         |
| YDR289C                                          | RTT103        | YLR254C                 | NDL1          |
| YLR094C                                          | GIS3          | YBR019C                 | GAL10         |
| YMR055C                                          | BUB2          | YLR315W                 | NKP2          |
| YPR029C                                          | APL4          | YDR153C                 | ENT5          |
| YNL127W                                          | FAR11         | YDR153C                 | ENT5          |
| YLR234W                                          | TOP3          | YGL163C                 | RAD54         |
| YDL223C                                          | HBT1          | YER040W                 | GLN3          |
| YKL139W                                          | CTK1          | YPL022W                 | RAD1          |

| Predictions at threshold level 0.80 continued... |               |                         |               |
|--------------------------------------------------|---------------|-------------------------|---------------|
| Gene1 of predicted pair                          |               | Gene2 of predicted pair |               |
| Systematic Name                                  | Standard Name | Systematic Name         | Standard Name |
| YIL076W                                          | SEC28         | YOR043W                 | WHI2          |
| YAL030W                                          | SNC1          | YPR032W                 | SRO7          |
| YNL325C                                          | FIG4          | YBL025W                 | RRN10         |
| YJL176C                                          | SWI3          | YGL215W                 | CLG1          |
| YPL042C                                          | SSN3          | YOL051W                 | GAL11         |
| YPL152W                                          | RRD2          | YGL163C                 | RAD54         |
| YPL105C                                          | YPL105C       | YJR060W                 | CBF1          |
| YKR101W                                          | SIR1          | YDL042C                 | SIR2          |
| YLR398C                                          | SKI2          | YMR214W                 | SCJ1          |
| YHR178W                                          | STB5          | YNL107W                 | YAF9          |
| YMR199W                                          | CLN1          | YNL229C                 | URE2          |
| YOR337W                                          | TEA1          | YDR137W                 | RGP1          |
| YBR264C                                          | YPT10         | YNL044W                 | YIP3          |
| YDR310C                                          | SUM1          | YAL002W                 | VPS8          |
| YPL046C                                          | ELC1          | YBR114W                 | RAD16         |
| YPL129W                                          | TAF14         | YBR289W                 | SNF5          |
| YGR184C                                          | UBR1          | YDR363W-A               | SEM1          |
| YAL024C                                          | LTE1          | YLR234W                 | TOP3          |
| YNL117W                                          | MLS1          | YJL095W                 | BCK1          |
| YPL161C                                          | BEM4          | YLR309C                 | IMH1          |
| YMR224C                                          | MRE11         | YOL111C                 | MDY2          |
| YMR109W                                          | MYO5          | YDR310C                 | SUM1          |
| YLR441C                                          | RPS1A         | YPL161C                 | BEM4          |
| YJL124C                                          | LSM1          | YNL016W                 | PUB1          |
| YDL223C                                          | HBT1          | YDR261C                 | EXG2          |
| YJR040W                                          | GEF1          | YNR032W                 | PPG1          |
| YLR320W                                          | MMS22         | YMR152W                 | YIM1          |
| YLR337C                                          | VRP1          | YDL155W                 | CLB3          |
| YNL069C                                          | RPL16B        | YKR001C                 | VPS1          |

| Predictions at threshold level 0.80 continued... |               |                         |               |
|--------------------------------------------------|---------------|-------------------------|---------------|
| Gene1 of predicted pair                          |               | Gene2 of predicted pair |               |
| Systematic Name                                  | Standard Name | Systematic Name         | Standard Name |
| YGL178W                                          | MPT5          | YMR263W                 | SAP30         |
| YPR131C                                          | NAT3          | YNL236W                 | SIN4          |
| YKL139W                                          | CTK1          | YMR133W                 | REC114        |
| YJL124C                                          | LSM1          | YCL037C                 | SRO9          |
| YOR101W                                          | RAS1          | YNL079C                 | TPM1          |
| YGL200C                                          | EMP24         | YFL048C                 | EMP47         |
| YER162C                                          | RAD4          | YOL081W                 | IRA2          |
| YGL094C                                          | PAN2          | YKL114C                 | APN1          |
| YDR293C                                          | SSD1          | YJR032W                 | CPR7          |
| YNL215W                                          | IES2          | YGL151W                 | NUT1          |
| YMR054W                                          | STV1          | YEL051W                 | VMA8          |
| YOR069W                                          | VPS5          | YHL020C                 | OPI1          |
| YOL044W                                          | PEX15         | YGL153W                 | PEX14         |
| YER144C                                          | UBP5          | YPL195W                 | APL5          |
| YOR043W                                          | WHI2          | YGL115W                 | SNF4          |
| YBR274W                                          | CHK1          | YGL250W                 | RMR1          |
| YHR152W                                          | SPO12         | YKL032C                 | IXR1          |
| YBR217W                                          | ATG12         | YCR053W                 | THR4          |
| YDL077C                                          | VAM6          | YJR033C                 | RAV1          |
| YOR124C                                          | UBP2          | YLR182W                 | SWI6          |
| YKR014C                                          | YPT52         | YEL036C                 | ANP1          |
| YBR010W                                          | HHT1          | YNL030W                 | HHF2          |
| YCL001W                                          | RER1          | YEL053C                 | MAK10         |
| YNR052C                                          | POP2          | YLR182W                 | SWI6          |
| YOR132W                                          | VPS17         | YJR060W                 | CBF1          |
| YDR174W                                          | HMO1          | YJR135C                 | MCM22         |
| YMR095C                                          | SNO1          | YML115C                 | VAN1          |
| YOR023C                                          | AHC1          | YDR310C                 | SUM1          |
| YDR108W                                          | GSG1          | YKR001C                 | VPS1          |

| Predictions at threshold level 0.80 continued... |               |                         |               |
|--------------------------------------------------|---------------|-------------------------|---------------|
| Gene1 of predicted pair                          |               | Gene2 of predicted pair |               |
| Systematic Name                                  | Standard Name | Systematic Name         | Standard Name |
| YLR234W                                          | TOP3          | YBR200W                 | BEM1          |
| YBR274W                                          | CHK1          | YNL234W                 | YNL234W       |
| YEL065W                                          | SIT1          | YOR270C                 | VPH1          |
| YFR040W                                          | SAP155        | YLR452C                 | SST2          |
| YDR484W                                          | VPS52         | YDR207C                 | UME6          |
| YLR093C                                          | NYV1          | YOR327C                 | SNC2          |
| YDR477W                                          | SNF1          | YMR016C                 | SOK2          |
| YOR043W                                          | WHI2          | YHR039C-A               | VMA10         |
| YBR228W                                          | SLX1          | YJL124C                 | LSM1          |
| YKR035W-A                                        | DID2          | YLR452C                 | SST2          |
| YGL212W                                          | VAM7          | YDL226C                 | GCS1          |
| YDR477W                                          | SNF1          | YIL076W                 | SEC28         |
| YNL307C                                          | MCK1          | YOR035C                 | SHE4          |
| YDR320C                                          | SWA2          | YPL234C                 | TFP3          |
| YLR309C                                          | IMH1          | YDR207C                 | UME6          |
| YKR072C                                          | SIS2          | YJR090C                 | GRR1          |
| YOR132W                                          | VPS17         | YMR004W                 | MVP1          |
| YBL103C                                          | RTG3          | YBR171W                 | SEC66         |
| YFL013C                                          | IES1          | YJL124C                 | LSM1          |
| YPR030W                                          | CSR2          | YJL095W                 | BCK1          |
| YKL126W                                          | YPK1          | YMR133W                 | REC114        |
| YPL022W                                          | RAD1          | YJL006C                 | CTK2          |
| YOR112W                                          | CEX1          | YOL108C                 | INO4          |
| YLR090W                                          | XDJ1          | YFR031C-A               | RPL2A         |
| YGR054W                                          | YGR054W       | YOL067C                 | RTG1          |
| YML115C                                          | VAN1          | YPR046W                 | MCM16         |
| YKR072C                                          | SIS2          | YJR035W                 | RAD26         |
| YJL154C                                          | VPS35         | YHL020C                 | OPI1          |
| YDL184C                                          | RPL41A        | YOR035C                 | SHE4          |



| Predictions at threshold level 0.80 continued... |               |                         |               |
|--------------------------------------------------|---------------|-------------------------|---------------|
| Gene1 of predicted pair                          |               | Gene2 of predicted pair |               |
| Systematic Name                                  | Standard Name | Systematic Name         | Standard Name |
| YML115C                                          | VAN1          | YCR031C                 | RPS14A        |
| YBR217W                                          | ATG12         | YJR084W                 | CSN12         |
| YGL033W                                          | HOP2          | YER139C                 | YER139C       |
| YMR216C                                          | SKY1          | YNL238W                 | KEX2          |
| YDL020C                                          | RPN4          | YDL059C                 | RAD59         |
| YJL124C                                          | LSM1          | YLR254C                 | NDL1          |
| YNL325C                                          | FIG4          | YPR030W                 | CSR2          |
| YNL087W                                          | TCB2          | YJL183W                 | MNN11         |
| YDR108W                                          | GSG1          | YAR014C                 | BUD14         |
| YOR132W                                          | VPS17         | YEL043W                 | YEL043W       |
| YCR086W                                          | CSM1          | YGL031C                 | RPL24A        |
| YER107C                                          | GLE2          | YMR223W                 | UBP8          |
| YDR123C                                          | INO2          | YHL020C                 | OPI1          |
| YOR096W                                          | RPS7A         | YOR078W                 | BUD21         |
| YER110C                                          | KAP123        | YDR310C                 | SUM1          |
| YOR127W                                          | RGA1          | YEL051W                 | VMA8          |
| YPL152W                                          | RRD2          | YPL018W                 | CTF19         |
| YLR360W                                          | VPS38         | YDR153C                 | ENT5          |
| YLR447C                                          | VMA6          | YJL095W                 | BCK1          |
| YMR224C                                          | MRE11         | YML103C                 | NUP188        |
| YHR039C-A                                        | VMA10         | YPL137C                 | GIP3          |
| YBL008W                                          | HIR1          | YHL025W                 | SNF6          |
| YHR013C                                          | ARD1          | YBR181C                 | RPS6B         |
| YDR137W                                          | RGP1          | YER044C                 | ERG28         |
| YGR020C                                          | VMA7          | YPL195W                 | APL5          |
| YHR111W                                          | UBA4          | YPL161C                 | BEM4          |
| YLR006C                                          | SSK1          | YCR077C                 | PAT1          |
| YDL020C                                          | RPN4          | YLR288C                 | MEC3          |
| YNL117W                                          | MLS1          | YML028W                 | TSA1          |

| Predictions at threshold level 0.80 continued... |               |                         |               |
|--------------------------------------------------|---------------|-------------------------|---------------|
| Gene1 of predicted pair                          |               | Gene2 of predicted pair |               |
| Systematic Name                                  | Standard Name | Systematic Name         | Standard Name |
| YMR164C                                          | MSS11         | YPL178W                 | CBC2          |
| YBL103C                                          | RTG3          | YNL076W                 | MKS1          |
| YDR443C                                          | SSN2          | YBL025W                 | RRN10         |
| YDR448W                                          | ADA2          | YFR034C                 | PHO4          |
| YDR254W                                          | CHL4          | YOL081W                 | IRA2          |
| YOR337W                                          | TEA1          | YPR036W                 | VMA13         |
| YOR109W                                          | INP53         | YDR310C                 | SUM1          |
| YGL133W                                          | ITC1          | YOR127W                 | RGA1          |
| YBR200W                                          | BEM1          | YBR127C                 | VMA2          |
| YGL175C                                          | SAE2          | YMR231W                 | PEP5          |
| YGL115W                                          | SNF4          | YNL107W                 | YAF9          |
| YDR245W                                          | MNN10         | YHR108W                 | GGA2          |
| YLR399C                                          | BDF1          | YPR046W                 | MCM16         |
| YNL054W                                          | VAC7          | YLR315W                 | NKP2          |
| YOL086C                                          | ADH1          | YPR119W                 | CLB2          |
| YJL172W                                          | CPS1          | YKR035W-A               | DID2          |
| YGL078C                                          | DBP3          | YPL195W                 | APL5          |
| YFR036W                                          | CDC26         | YGL124C                 | MON1          |
| YPL024W                                          | RMI1          | YCR053W                 | THR4          |
| YPL253C                                          | VIK1          | YML112W                 | CTK3          |
| YEL027W                                          | CUP5          | YNL238W                 | KEX2          |
| YIL034C                                          | CAP2          | YLR429W                 | CRN1          |
| YJL095W                                          | BCK1          | YLR398C                 | SKI2          |
| YDR004W                                          | RAD57         | YKL068W                 | NUP100        |
| YJR084W                                          | CSN12         | YCR053W                 | THR4          |
| YJL154C                                          | VPS35         | YAR014C                 | BUD14         |
| YOR290C                                          | SNF2          | YPL137C                 | GIP3          |
| YMR026C                                          | PEX12         | YMR230W                 | RPS10B        |
| YHR073W                                          | OSH3          | YJR024C                 | MDE1          |

| Predictions at threshold level 0.80 continued... |               |                         |               |
|--------------------------------------------------|---------------|-------------------------|---------------|
| Gene1 of predicted pair                          |               | Gene2 of predicted pair |               |
| Systematic Name                                  | Standard Name | Systematic Name         | Standard Name |
| YGL135W                                          | RPL1B         | YML071C                 | COG8          |
| YDR108W                                          | GSG1          | YEL051W                 | VMA8          |
| YDR171W                                          | HSP42         | YJR135C                 | MCM22         |
| YPR072W                                          | NOT5          | YGL094C                 | PAN2          |
| YNL325C                                          | FIG4          | YBR019C                 | GAL10         |
| YGL223C                                          | COG1          | YJL029C                 | VPS53         |
| YJL164C                                          | TPK1          | YAL030W                 | SNC1          |
| YER116C                                          | SLX8          | YJL172W                 | CPS1          |
| YMR016C                                          | SOK2          | YPR046W                 | MCM16         |
| YJL053W                                          | PEP8          | YDL226C                 | GCS1          |
| YJL187C                                          | SWE1          | YDL226C                 | GCS1          |
| YMR095C                                          | SNO1          | YBL058W                 | SHP1          |
| YJR060W                                          | CBF1          | YDR183W                 | PLP1          |
| YLR288C                                          | MEC3          | YNL297C                 | MON2          |
| YDL002C                                          | NHP10         | YLR350W                 | ORM2          |
| YER162C                                          | RAD4          | YLR309C                 | IMH1          |
| YGR249W                                          | MGA1          | YML071C                 | COG8          |
| YPL024W                                          | RMI1          | YBR108W                 | YBR108W       |
| YBL103C                                          | RTG3          | YPR046W                 | MCM16         |
| YDR358W                                          | GGA1          | YGL003C                 | CDH1          |
| YHR134W                                          | WSS1          | YDR144C                 | MKC7          |
| YJL078C                                          | PRY3          | YMR319C                 | FET4          |
| YDR277C                                          | MTH1          | YPR119W                 | CLB2          |
| YGR217W                                          | CCH1          | YDL006W                 | PTC1          |
| YHR111W                                          | UBA4          | YJR135C                 | MCM22         |
| YBR173C                                          | UMP1          | YDL047W                 | SIT4          |
| YHR178W                                          | STB5          | YEL056W                 | HAT2          |
| YBL103C                                          | RTG3          | YDL083C                 | RPS16B        |
| YKR059W                                          | TIF1          | YJR140C                 | HIR3          |

| Predictions at threshold level 0.80 continued... |               |                         |               |
|--------------------------------------------------|---------------|-------------------------|---------------|
| Gene1 of predicted pair                          |               | Gene2 of predicted pair |               |
| Systematic Name                                  | Standard Name | Systematic Name         | Standard Name |
| YPL161C                                          | BEM4          | YDR358W                 | GGA1          |
| YPL115C                                          | BEM3          | YLR386W                 | VAC14         |
| YML115C                                          | VAN1          | YPL195W                 | APL5          |
| YKR061W                                          | KTR2          | YML112W                 | CTK3          |
| YKL006W                                          | RPL14A        | YDR440W                 | DOT1          |
| YCR024C-A                                        | PMP1          | YPL246C                 | RBD2          |
| YLR234W                                          | TOP3          | YBR195C                 | MSI1          |
| YMR016C                                          | SOK2          | YML001W                 | YPT7          |
| YDR254W                                          | CHL4          | YLR254C                 | NDL1          |
| YBL058W                                          | SHP1          | YJL183W                 | MNN11         |
| YPR036W                                          | VMA13         | YGL163C                 | RAD54         |
| YKL126W                                          | YPK1          | YLR180W                 | SAM1          |
| YEL065W                                          | SIT1          | YBR200W                 | BEM1          |
| YKL139W                                          | CTK1          | YPL137C                 | GIP3          |
| YGL212W                                          | VAM7          | YNL238W                 | KEX2          |
| YDR156W                                          | RPA14         | YKR020W                 | VPS51         |
| YKL010C                                          | UFD4          | YMR116C                 | ASC1          |
| YLR371W                                          | ROM2          | YBR019C                 | GAL10         |
| YLR337C                                          | VRP1          | YDR245W                 | MNN10         |
| YLR090W                                          | XDJ1          | YHR060W                 | VMA22         |
| YPL234C                                          | TFP3          | YER122C                 | GLO3          |
| YDL020C                                          | RPN4          | YML115C                 | VAN1          |
| YHR178W                                          | STB5          | YJR140C                 | HIR3          |
| YNL041C                                          | COG6          | YDL077C                 | VAM6          |
| YMR116C                                          | ASC1          | YGL175C                 | SAE2          |
| YDR448W                                          | ADA2          | YOL051W                 | GAL11         |
| YML016C                                          | PPZ1          | YJL124C                 | LSM1          |
| YLR360W                                          | VPS38         | YOR106W                 | VAM3          |
| YNL058C                                          | YNL058C       | YOR035C                 | SHE4          |

| Predictions at threshold level 0.80 continued... |               |                         |               |
|--------------------------------------------------|---------------|-------------------------|---------------|
| Gene1 of predicted pair                          |               | Gene2 of predicted pair |               |
| Systematic Name                                  | Standard Name | Systematic Name         | Standard Name |
| YEL013W                                          | VAC8          | YER122C                 | GLO3          |
| YOL030W                                          | GAS5          | YJL124C                 | LSM1          |
| YJR060W                                          | CBF1          | YPL234C                 | TFP3          |
| YMR055C                                          | BUB2          | YJR005W                 | APL1          |
| YJL036W                                          | SNX4          | YPL161C                 | BEM4          |
| YHR012W                                          | VPS29         | YEL036C                 | ANP1          |
| YDR155C                                          | CPR1          | YJL095W                 | BCK1          |
| YOR358W                                          | HAP5          | YGR059W                 | SPR3          |
| YGR249W                                          | MGA1          | YEL060C                 | PRB1          |
| YDR443C                                          | SSN2          | YER139C                 | YER139C       |
| YGL175C                                          | SAE2          | YDR207C                 | UME6          |
| YLR234W                                          | TOP3          | YHR111W                 | UBA4          |
| YNL199C                                          | GCR2          | YHR012W                 | VPS29         |
| YBR215W                                          | HPC2          | YNL107W                 | YAF9          |
| YHR081W                                          | LRP1          | YML071C                 | COG8          |
| YIL076W                                          | SEC28         | YPL105C                 | YPL105C       |
| YLR337C                                          | VRP1          | YGR270W                 | YTA7          |
| YPR189W                                          | SKI3          | YLR398C                 | SKI2          |
| YML038C                                          | YMD8          | YNL107W                 | YAF9          |
| YIL076W                                          | SEC28         | YBR217W                 | ATG12         |
| YGL163C                                          | RAD54         | YGL148W                 | ARO2          |
| YPL105C                                          | YPL105C       | YEL053C                 | MAK10         |
| YNL199C                                          | GCR2          | YPL246C                 | RBD2          |
| YBR089C-A                                        | NHP6B         | YPL248C                 | GAL4          |
| YKR099W                                          | BAS1          | YNL058C                 | YNL058C       |
| YMR313C                                          | TGL3          | YMR152W                 | YIM1          |
| YDR129C                                          | SAC6          | YJL029C                 | VPS53         |
| YKL126W                                          | YPK1          | YKR035W-A               | DID2          |
| YLR386W                                          | VAC14         | YLR254C                 | NDL1          |

| Predictions at threshold level 0.80 continued... |               |                         |               |
|--------------------------------------------------|---------------|-------------------------|---------------|
| Gene1 of predicted pair                          |               | Gene2 of predicted pair |               |
| Systematic Name                                  | Standard Name | Systematic Name         | Standard Name |
| YJL006C                                          | CTK2          | YML112W                 | CTK3          |
| YDL083C                                          | RPS16B        | YEL060C                 | PRB1          |
| YDR379W                                          | RGA2          | YOR275C                 | RIM20         |
| YBL051C                                          | PIN4          | YOR023C                 | AHC1          |
| YNR052C                                          | POP2          | YDL155W                 | CLB3          |
| YEL053C                                          | MAK10         | YBR280C                 | SAF1          |
| YIR005W                                          | IST3          | YPL018W                 | CTF19         |
| YNL243W                                          | SLA2          | YCR009C                 | RVS161        |
| YIL076W                                          | SEC28         | YOR308C                 | SNU66         |
| YPL042C                                          | SSN3          | YDR363W-A               | SEM1          |
| YBR290W                                          | BSD2          | YJR032W                 | CPR7          |
| YOR275C                                          | RIM20         | YHR200W                 | RPN10         |
| YDL020C                                          | RPN4          | YLR024C                 | UBR2          |
| YLR452C                                          | SST2          | YGL115W                 | SNF4          |
| YJR056C                                          | YJR056C       | YGL124C                 | MON1          |
| YML001W                                          | YPT7          | YOR066W                 | MSA1          |
| YHR108W                                          | GGA2          | YLR306W                 | UBC12         |
| YHR060W                                          | VMA22         | YOR043W                 | WHI2          |
| YFR036W                                          | CDC26         | YBR019C                 | GAL10         |
| YPR084W                                          | YPR084W       | YMR004W                 | MVP1          |
| YPL057C                                          | SUR1          | YCL037C                 | SRO9          |
| YMR224C                                          | MRE11         | YML112W                 | CTK3          |
| YIL076W                                          | SEC28         | YER040W                 | GLN3          |
| YML001W                                          | YPT7          | YMR054W                 | STV1          |
| YDL184C                                          | RPL41A        | YHR039C-A               | VMA10         |
| YGL078C                                          | DBP3          | YGL025C                 | PGD1          |
| YBR173C                                          | UMP1          | YBR030W                 | YBR030W       |
| YBL101C                                          | ECM21         | YMR089C                 | YTA12         |
| YBR019C                                          | GAL10         | YMR214W                 | SCJ1          |

| Predictions at threshold level 0.80 continued... |               |                         |               |
|--------------------------------------------------|---------------|-------------------------|---------------|
| Gene1 of predicted pair                          |               | Gene2 of predicted pair |               |
| Systematic Name                                  | Standard Name | Systematic Name         | Standard Name |
| YNL201C                                          | PSY2          | YBR200W                 | BEM1          |
| YCL037C                                          | SRO9          | YEL013W                 | VAC8          |
| YOR140W                                          | SFL1          | YER049W                 | TPA1          |
| YMR116C                                          | ASC1          | YBR200W                 | BEM1          |
| YLR386W                                          | VAC14         | YJL190C                 | RPS22A        |
| YGL237C                                          | HAP2          | YPL161C                 | BEM4          |
| YHR156C                                          | LIN1          | YER122C                 | GLO3          |
| YPR120C                                          | CLB5          | YGL148W                 | ARO2          |
| YOR043W                                          | WHI2          | YGL163C                 | RAD54         |
| YOL111C                                          | MDY2          | YGL115W                 | SNF4          |
| YER116C                                          | SLX8          | YML071C                 | COG8          |
| YBR194W                                          | SOY1          | YOR038C                 | HIR2          |
| YIL159W                                          | BNR1          | YBL058W                 | SHP1          |
| YPL001W                                          | HAT1          | YGL148W                 | ARO2          |
| YMR116C                                          | ASC1          | YEL044W                 | IES6          |
| YMR055C                                          | BUB2          | YML112W                 | CTK3          |
| YIL076W                                          | SEC28         | YOR080W                 | DIA2          |
| YFR030W                                          | MET10         | YNL225C                 | CNM67         |
| YGL078C                                          | DBP3          | YHR200W                 | RPN10         |
| YJL210W                                          | PEX2          | YLR191W                 | PEX13         |
| YPR052C                                          | NHP6A         | YNL031C                 | HHT2          |
| YAL024C                                          | LTE1          | YHR178W                 | STB5          |
| YHR013C                                          | ARD1          | YDL155W                 | CLB3          |
| YNL166C                                          | BNI5          | YIL008W                 | URM1          |
| YIL159W                                          | BNR1          | YJL183W                 | MNN11         |
| YKR020W                                          | VPS51         | YPL045W                 | VPS16         |
| YIL076W                                          | SEC28         | YMR311C                 | GLC8          |
| YOR337W                                          | TEA1          | YMR153W                 | NUP53         |
| YBR274W                                          | CHK1          | YMR055C                 | BUB2          |

| Predictions at threshold level 0.80 continued... |               |                         |               |
|--------------------------------------------------|---------------|-------------------------|---------------|
| Gene1 of predicted pair                          |               | Gene2 of predicted pair |               |
| Systematic Name                                  | Standard Name | Systematic Name         | Standard Name |
| YKL126W                                          | YPK1          | YOL111C                 | MDY2          |
| YFL023W                                          | BUD27         | YBR036C                 | CSG2          |
| YIL159W                                          | BNR1          | YGR249W                 | MGA1          |
| YLR234W                                          | TOP3          | YMR055C                 | BUB2          |
| YNL054W                                          | VAC7          | YJL006C                 | CTK2          |
| YGL033W                                          | HOP2          | YFR010W                 | UBP6          |
| YGL060W                                          | YBP2          | YGL003C                 | CDH1          |
| YGL212W                                          | VAM7          | YPL120W                 | VPS30         |
| YLR399C                                          | BDF1          | YDR183W                 | PLP1          |
| YLR381W                                          | CTF3          | YNL116W                 | DMA2          |
| YDR225W                                          | HTA1          | YPL018W                 | CTF19         |
| YCR020C-A                                        | MAK31         | YHR012W                 | VPS29         |
| YHR013C                                          | ARD1          | YML028W                 | TSA1          |
| YNL288W                                          | CAF40         | YOR023C                 | AHC1          |
| YLL039C                                          | UBI4          | YHL002W                 | HSE1          |
| YMR284W                                          | YKU70         | YBL019W                 | APN2          |
| YPR049C                                          | ATG11         | YKL103C                 | LAP4          |
| YBR108W                                          | YBR108W       | YOR066W                 | MSA1          |
| YMR153W                                          | NUP53         | YLR094C                 | GIS3          |
| YDR378C                                          | LSM6          | YOL081W                 | IRA2          |
| YBL047C                                          | EDE1          | YHR158C                 | KEL1          |
| YKL139W                                          | CTK1          | YGL025C                 | PGD1          |
| YLR386W                                          | VAC14         | YHR039C-A               | VMA10         |
| YCR020C-A                                        | MAK31         | YPL037C                 | EGD1          |
| YML095C                                          | RAD10         | YGR188C                 | BUB1          |
| YPL253C                                          | VIK1          | YJL190C                 | RPS22A        |
| YKR061W                                          | KTR2          | YBR107C                 | IML3          |
| YGL237C                                          | HAP2          | YPL018W                 | CTF19         |
| YDR103W                                          | STE5          | YGR152C                 | RSR1          |



| Predictions at threshold level 0.80 continued... |               |                         |               |
|--------------------------------------------------|---------------|-------------------------|---------------|
| Gene1 of predicted pair                          |               | Gene2 of predicted pair |               |
| Systematic Name                                  | Standard Name | Systematic Name         | Standard Name |
| YEL065W                                          | SIT1          | YPL161C                 | BEM4          |
| YNL069C                                          | RPL16B        | YGR105W                 | VMA21         |
| YPL203W                                          | TPK2          | YIL033C                 | BCY1          |
| YMR004W                                          | MVP1          | YPL105C                 | YPL105C       |
| YGL147C                                          | RPL9A         | YGL003C                 | CDH1          |
| YHL031C                                          | GOS1          | YDR335W                 | MSN5          |
| YNL248C                                          | RPA49         | YDR335W                 | MSN5          |
| YLR410W                                          | VIP1          | YPL018W                 | CTF19         |
| YOR076C                                          | SKI7          | YGR071C                 | YGR071C       |
| YBR057C                                          | MUM2          | YBL047C                 | EDE1          |
| YLR386W                                          | VAC14         | YJR060W                 | CBF1          |
| YGL087C                                          | MMS2          | YLR360W                 | VPS38         |
| YJR140C                                          | HIR3          | YNL199C                 | GCR2          |
| YLR398C                                          | SKI2          | YBR280C                 | SAF1          |
| YJL078C                                          | PRY3          | YJR106W                 | ECM27         |
| YJR056C                                          | YJR056C       | YHR200W                 | RPN10         |
| YDR202C                                          | RAV2          | YER162C                 | RAD4          |
| YJR032W                                          | CPR7          | YDR358W                 | GGA1          |
| YNL032W                                          | SIW14         | YMR153W                 | NUP53         |
| YGR152C                                          | RSR1          | YDR310C                 | SUM1          |
| YKR095W                                          | MLP1          | YMR273C                 | ZDS1          |
| YIL076W                                          | SEC28         | YJR033C                 | RAV1          |
| YHR134W                                          | WSS1          | YDR310C                 | SUM1          |
| YFR031C-A                                        | RPL2A         | YNL069C                 | RPL16B        |
| YJR063W                                          | RPA12         | YLR254C                 | NDL1          |
| YJL124C                                          | LSM1          | YHR111W                 | UBA4          |
| YDR484W                                          | VPS52         | YDL192W                 | ARF1          |
| YJL036W                                          | SNX4          | YNL107W                 | YAF9          |
| YNL264C                                          | PDR17         | YDR363W-A               | SEM1          |

| Predictions at threshold level 0.80 continued... |               |                         |               |
|--------------------------------------------------|---------------|-------------------------|---------------|
| Gene1 of predicted pair                          |               | Gene2 of predicted pair |               |
| Systematic Name                                  | Standard Name | Systematic Name         | Standard Name |
| YDR261C                                          | EXG2          | YBL025W                 | RRN10         |
| YNL079C                                          | TPM1          | YHL002W                 | HSE1          |
| YBR082C                                          | UBC4          | YAL002W                 | VPS8          |
| YNL215W                                          | IES2          | YLR399C                 | BDF1          |
| YNL201C                                          | PSY2          | YLR399C                 | BDF1          |
| YJL176C                                          | SWI3          | YNL106C                 | INP52         |
| YMR231W                                          | PEP5          | YGL095C                 | VPS45         |
| YGR270W                                          | YTA7          | YGL253W                 | HXK2          |
| YNL218W                                          | MGS1          | YOL090W                 | MSH2          |
| YLR410W                                          | VIP1          | YBR082C                 | UBC4          |
| YNL201C                                          | PSY2          | YLR079W                 | SIC1          |
| YGL147C                                          | RPL9A         | YJR032W                 | CPR7          |
| YDR137W                                          | RGP1          | YAL055W                 | PEX22         |
| YNL094W                                          | APP1          | YBL106C                 | SRO77         |
| YPR046W                                          | MCM16         | YOL067C                 | RTG1          |
| YFR031C-A                                        | RPL2A         | YMR133W                 | REC114        |
| YOR023C                                          | AHC1          | YDR318W                 | MCM21         |
| YHR039C-A                                        | VMA10         | YLR309C                 | IMH1          |
| YNL297C                                          | MON2          | YDR440W                 | DOT1          |
| YPR029C                                          | APL4          | YKL135C                 | APL2          |
| YIR005W                                          | IST3          | YEL013W                 | VAC8          |
| YLR273C                                          | PIG1          | YLR258W                 | GSY2          |
| YNL139C                                          | RLR1          | YKL139W                 | CTK1          |
| YLR410W                                          | VIP1          | YPR046W                 | MCM16         |
| YBL058W                                          | SHP1          | YBR019C                 | GAL10         |
| YBL058W                                          | SHP1          | YLR192C                 | HCR1          |
| YMR153W                                          | NUP53         | YMR230W                 | RPS10B        |
| YPR036W                                          | VMA13         | YJL183W                 | MNN11         |
| YLR410W                                          | VIP1          | YHR115C                 | DMA1          |

| Predictions at threshold level 0.80 continued... |               |                         |               |
|--------------------------------------------------|---------------|-------------------------|---------------|
| Gene1 of predicted pair                          |               | Gene2 of predicted pair |               |
| Systematic Name                                  | Standard Name | Systematic Name         | Standard Name |
| YMR004W                                          | MVP1          | YER122C                 | GLO3          |
| YDR293C                                          | SSD1          | YCR077C                 | PAT1          |
| YOR043W                                          | WHI2          | YGL124C                 | MON1          |
| YDR202C                                          | RAV2          | YCL001W                 | RER1          |
| YLR386W                                          | VAC14         | YOL067C                 | RTG1          |
| YMR127C                                          | SAS2          | YHR012W                 | VPS29         |
| YOL111C                                          | MDY2          | YJR032W                 | CPR7          |
| YPL137C                                          | GIP3          | YOL081W                 | IRA2          |
| YHR205W                                          | SCH9          | YHR030C                 | SLT2          |
| YML016C                                          | PPZ1          | YDR378C                 | LSM6          |
| YBR057C                                          | MUM2          | YPL253C                 | VIK1          |
| YBR057C                                          | MUM2          | YHR013C                 | ARD1          |
| YJL187C                                          | SWE1          | YGL031C                 | RPL24A        |
| YNL031C                                          | HHT2          | YMR273C                 | ZDS1          |
| YKR057W                                          | RPS21A        | YKL032C                 | IXR1          |
| YHR111W                                          | UBA4          | YJL006C                 | CTK2          |
| YBR065C                                          | ECM2          | YGR006W                 | PRP18         |
| YER049W                                          | TPA1          | YDR207C                 | UME6          |
| YPL256C                                          | CLN2          | YOR368W                 | RAD17         |
| YLR313C                                          | SPH1          | YML028W                 | TSA1          |
| YFR010W                                          | UBP6          | YLR370C                 | ARC18         |
| YPR051W                                          | MAK3          | YGR105W                 | VMA21         |
| YNR072W                                          | HXT17         | YLR320W                 | MMS22         |
| YGL147C                                          | RPL9A         | YDR484W                 | VPS52         |
| YGL135W                                          | RPL1B         | YAL055W                 | PEX22         |
| YNL044W                                          | YIP3          | YJR033C                 | RAV1          |
| YKR072C                                          | SIS2          | YBR195C                 | MSI1          |
| YER139C                                          | YER139C       | YLR350W                 | ORM2          |
| YDL160C                                          | DHH1          | YKL114C                 | APN1          |

| Predictions at threshold level 0.80 continued... |               |                         |               |
|--------------------------------------------------|---------------|-------------------------|---------------|
| Gene1 of predicted pair                          |               | Gene2 of predicted pair |               |
| Systematic Name                                  | Standard Name | Systematic Name         | Standard Name |
| YBR108W                                          | YBR108W       | YDL077C                 | VAM6          |
| YMR153W                                          | NUP53         | YNR072W                 | HXT17         |
| YOR001W                                          | RRP6          | YPL018W                 | CTF19         |
| YBL102W                                          | SFT2          | YHL031C                 | GOS1          |
| YLR315W                                          | NKP2          | YOR124C                 | UBP2          |
| YLR119W                                          | SRN2          | YBR108W                 | YBR108W       |
| YDR363W-A                                        | SEM1          | YFR036W                 | CDC26         |
| YML097C                                          | VPS9          | YBR181C                 | RPS6B         |
| YDR448W                                          | ADA2          | YDR216W                 | ADR1          |
| YMR026C                                          | PEX12         | YGR249W                 | MGA1          |
| YER096W                                          | SHC1          | YMR055C                 | BUB2          |
| YBL102W                                          | SFT2          | YGL212W                 | VAM7          |
| YBL021C                                          | HAP3          | YPL253C                 | VIK1          |
| YDL184C                                          | RPL41A        | YPL195W                 | APL5          |
| YJL060W                                          | BNA3          | YNL236W                 | SIN4          |
| YDR137W                                          | RGP1          | YNL051W                 | COG5          |
| YDR293C                                          | SSD1          | YIL038C                 | NOT3          |
| YPL022W                                          | RAD1          | YPL106C                 | SSE1          |
| YFR031C-A                                        | RPL2A         | YDL006W                 | PTC1          |
| YCR086W                                          | CSM1          | YNL225C                 | CNM67         |
| YLR090W                                          | XDJ1          | YOR035C                 | SHE4          |
| YOR023C                                          | AHC1          | YCR086W                 | CSM1          |
| YGL066W                                          | SGF73         | YLR102C                 | APC9          |
| YDR129C                                          | SAC6          | YER122C                 | GLO3          |
| YMR142C                                          | RPL13B        | YNL238W                 | KEX2          |
| YJL176C                                          | SWI3          | YDR440W                 | DOT1          |
| YDL013W                                          | SLX5          | YOR368W                 | RAD17         |
| YKR001C                                          | VPS1          | YKR030W                 | GMH1          |
| YJR033C                                          | RAV1          | YAL002W                 | VPS8          |

| Predictions at threshold level 0.80 continued... |               |                         |               |
|--------------------------------------------------|---------------|-------------------------|---------------|
| Gene1 of predicted pair                          |               | Gene2 of predicted pair |               |
| Systematic Name                                  | Standard Name | Systematic Name         | Standard Name |
| YML095C                                          | RAD10         | YJL006C                 | CTK2          |
| YNL106C                                          | INP52         | YHR167W                 | THP2          |
| YOR001W                                          | RRP6          | YDR289C                 | RTT103        |
| YDR456W                                          | NHX1          | YNL079C                 | TPM1          |
| YLR119W                                          | SRN2          | YOL111C                 | MDY2          |
| YNL087W                                          | TCB2          | YOL121C                 | RPS19A        |
| YJL136C                                          | RPS21B        | YGR135W                 | PRE9          |
| YPL024W                                          | RMI1          | YLR386W                 | VAC14         |
| YBR171W                                          | SEC66         | YLR371W                 | ROM2          |
| YML103C                                          | NUP188        | YHR115C                 | DMA1          |
| YML071C                                          | COG8          | YMR152W                 | YIM1          |
| YBR041W                                          | FAT1          | YKL048C                 | ELM1          |
| YAL024C                                          | LTE1          | YNL293W                 | MSB3          |
| YNL087W                                          | TCB2          | YJL172W                 | CPS1          |
| YNL229C                                          | URE2          | YNL116W                 | DMA2          |
| YKR035W-A                                        | DID2          | YMR152W                 | YIM1          |
| YDR318W                                          | MCM21         | YGL252C                 | RTG2          |
| YJL172W                                          | CPS1          | YPL195W                 | APL5          |
| YNR052C                                          | POP2          | YNL307C                 | MCK1          |
| YDR080W                                          | VPS41         | YML071C                 | COG8          |
| YDR363W-A                                        | SEM1          | YGL003C                 | CDH1          |
| YLR441C                                          | RPS1A         | YER044C                 | ERG28         |
| YLR381W                                          | CTF3          | YDR260C                 | SWM1          |
| YML103C                                          | NUP188        | YIL103W                 | DPH1          |
| YLR119W                                          | SRN2          | YNL307C                 | MCK1          |
| YNL058C                                          | YNL058C       | YDR261C                 | EXG2          |
| YMR004W                                          | MVP1          | YDR080W                 | VPS41         |
| YDR171W                                          | HSP42         | YPL018W                 | CTF19         |
| YHR178W                                          | STB5          | YER110C                 | KAP123        |

| Predictions at threshold level 0.80 continued... |               |                         |               |
|--------------------------------------------------|---------------|-------------------------|---------------|
| Gene1 of predicted pair                          |               | Gene2 of predicted pair |               |
| Systematic Name                                  | Standard Name | Systematic Name         | Standard Name |
| YLR452C                                          | SST2          | YLR398C                 | SKI2          |
| YBR270C                                          | BIT2          | YIL105C                 | SLM1          |
| YHR200W                                          | RPN10         | YPR046W                 | MCM16         |
| YDR004W                                          | RAD57         | YER161C                 | SPT2          |
| YNL069C                                          | RPL16B        | YPR051W                 | MAK3          |
| YGR241C                                          | YAP1802       | YKR020W                 | VPS51         |
| YKL101W                                          | HSL1          | YGL003C                 | CDH1          |
| YBL058W                                          | SHP1          | YBL103C                 | RTG3          |
| YJL006C                                          | CTK2          | YGL003C                 | CDH1          |
| YEL065W                                          | SIT1          | YNL325C                 | FIG4          |
| YKR059W                                          | TIF1          | YML016C                 | PPZ1          |
| YDL116W                                          | NUP84         | YMR125W                 | STO1          |
| YGL174W                                          | BUD13         | YNL107W                 | YAF9          |
| YDR293C                                          | SSD1          | YHR086W                 | NAM8          |
| YPL024W                                          | RMI1          | YOR035C                 | SHE4          |
| YOR327C                                          | SNC2          | YAR014C                 | BUD14         |
| YBR171W                                          | SEC66         | YPL050C                 | MNN9          |
| YPR049C                                          | ATG11         | YPR119W                 | CLB2          |
| YJL006C                                          | CTK2          | YJL183W                 | MNN11         |
| YLR320W                                          | MMS22         | YML071C                 | COG8          |
| YJL060W                                          | BNA3          | YLR079W                 | SIC1          |
| YMR039C                                          | SUB1          | YBR107C                 | IML3          |
| YBR020W                                          | GAL1          | YHR200W                 | RPN10         |
| YBL103C                                          | RTG3          | YPR036W                 | VMA13         |
| YPL161C                                          | BEM4          | YLR371W                 | ROM2          |
| YGR249W                                          | MGA1          | YKR099W                 | BAS1          |
| YDR293C                                          | SSD1          | YOR109W                 | INP53         |
| YJR024C                                          | MDE1          | YIL148W                 | RPL40A        |
| YPL057C                                          | SUR1          | YDR137W                 | RGP1          |

| Predictions at threshold level 0.80 continued... |               |                         |               |
|--------------------------------------------------|---------------|-------------------------|---------------|
| Gene1 of predicted pair                          |               | Gene2 of predicted pair |               |
| Systematic Name                                  | Standard Name | Systematic Name         | Standard Name |
| YDR192C                                          | NUP42         | YER110C                 | KAP123        |
| YNL264C                                          | PDR17         | YNL236W                 | SIN4          |
| YLR079W                                          | SIC1          | YLR381W                 | CTF3          |
| YPL158C                                          | YPL158C       | YHR158C                 | KEL1          |
| YJL124C                                          | LSM1          | YGL151W                 | NUT1          |
| YGL025C                                          | PGD1          | YJL095W                 | BCK1          |
| YNL307C                                          | MCK1          | YPL161C                 | BEM4          |
| YGR019W                                          | UGA1          | YHR114W                 | BZZ1          |
| YOR080W                                          | DIA2          | YCR086W                 | CSM1          |
| YML115C                                          | VAN1          | YML097C                 | VPS9          |
| YLR452C                                          | SST2          | YML001W                 | YPT7          |
| YPR051W                                          | MAK3          | YDR289C                 | RTT103        |
| YMR142C                                          | RPL13B        | YML001W                 | YPT7          |
| YMR016C                                          | SOK2          | YGL124C                 | MON1          |
| YER044C                                          | ERG28         | YBL025W                 | RRN10         |
| YKL126W                                          | YPK1          | YDL083C                 | RPS16B        |
| YNL068C                                          | FKH2          | YIL008W                 | URM1          |
| YMR133W                                          | REC114        | YHL022C                 | SPO11         |
| YBR082C                                          | UBC4          | YBR181C                 | RPS6B         |
| YPR018W                                          | RLF2          | YLR381W                 | CTF3          |
| YML007W                                          | YAP1          | YER110C                 | KAP123        |
| YGL212W                                          | VAM7          | YNL051W                 | COG5          |
| YMR224C                                          | MRE11         | YJR035W                 | RAD26         |
| YDL059C                                          | RAD59         | YML028W                 | TSA1          |
| YNR072W                                          | HXT17         | YGL124C                 | MON1          |
| YPR084W                                          | YPR084W       | YKR001C                 | VPS1          |
| YLR381W                                          | CTF3          | YGL115W                 | SNF4          |
| YLR452C                                          | SST2          | YFR036W                 | CDC26         |
| YJL154C                                          | VPS35         | YNL127W                 | FAR11         |

| Predictions at threshold level 0.80 continued... |               |                         |               |
|--------------------------------------------------|---------------|-------------------------|---------------|
| Gene1 of predicted pair                          |               | Gene2 of predicted pair |               |
| Systematic Name                                  | Standard Name | Systematic Name         | Standard Name |
| YJL210W                                          | PEX2          | YDR142C                 | PEX7          |
| YHR013C                                          | ARD1          | YOR014W                 | RTS1          |
| YER162C                                          | RAD4          | YPR032W                 | SRO7          |
| YOR080W                                          | DIA2          | YNL236W                 | SIN4          |
| YJL006C                                          | CTK2          | YHR115C                 | DMA1          |
| YJL127C                                          | SPT10         | YJR060W                 | CBF1          |
| YPL057C                                          | SUR1          | YNL297C                 | MON2          |
| YJL172W                                          | CPS1          | YJR056C                 | YJR056C       |
| YOR279C                                          | RFM1          | YDR310C                 | SUM1          |
| YPL253C                                          | VIK1          | YHR013C                 | ARD1          |
| YPR018W                                          | RLF2          | YDR260C                 | SWM1          |
| YGL025C                                          | PGD1          | YDL077C                 | VAM6          |
| YDL077C                                          | VAM6          | YBR036C                 | CSG2          |
| YLR093C                                          | NYV1          | YPL195W                 | APL5          |
| YJR056C                                          | YJR056C       | YJR032W                 | CPR7          |
| YDR507C                                          | GIN4          | YDR335W                 | MSN5          |
| YGL009C                                          | LEU1          | YPR119W                 | CLB2          |
| YLR234W                                          | TOP3          | YOL090W                 | MSH2          |
| YDR174W                                          | HMO1          | YKL110C                 | KTI12         |
| YPL253C                                          | VIK1          | YMR038C                 | CCS1          |
| YOL147C                                          | PEX11         | YDL078C                 | MDH3          |
| YNL201C                                          | PSY2          | YKR061W                 | KTR2          |
| YNR072W                                          | HXT17         | YMR133W                 | REC114        |
| YKL006W                                          | RPL14A        | YBL101C                 | ECM21         |
| YMR039C                                          | SUB1          | YPL024W                 | RMI1          |
| YGR072W                                          | UPF3          | YPL195W                 | APL5          |
| YGR081C                                          | SLX9          | YPL022W                 | RAD1          |
| YHR039C-A                                        | VMA10         | YLR093C                 | NYV1          |
| YHR171W                                          | ATG7          | YNL223W                 | ATG4          |



| Predictions at threshold level 0.80 continued... |               |                         |               |
|--------------------------------------------------|---------------|-------------------------|---------------|
| Gene1 of predicted pair                          |               | Gene2 of predicted pair |               |
| Systematic Name                                  | Standard Name | Systematic Name         | Standard Name |
| YKR039W                                          | GAP1          | YCL018W                 | LEU2          |
| YBR195C                                          | MSI1          | YGL148W                 | ARO2          |
| YLR234W                                          | TOP3          | YOR023C                 | AHC1          |
| YBR173C                                          | UMP1          | YNL238W                 | KEX2          |
| YIL034C                                          | CAP2          | YCR077C                 | PAT1          |
| YDR174W                                          | HMO1          | YNL054W                 | VAC7          |
| YMR224C                                          | MRE11         | YDL223C                 | HBT1          |
| YHR012W                                          | VPS29         | YOR208W                 | PTP2          |
| YKR099W                                          | BAS1          | YPL195W                 | APL5          |
| YKR020W                                          | VPS51         | YBR082C                 | UBC4          |
| YER002W                                          | NOP16         | YKL009W                 | MRT4          |
| YHR178W                                          | STB5          | YDR155C                 | CPR1          |
| YBL008W                                          | HIR1          | YBR274W                 | CHK1          |
| YOR195W                                          | SLK19         | YNL116W                 | DMA2          |
| YER027C                                          | GAL83         | YGL179C                 | TOS3          |
| YMR004W                                          | MVP1          | YHL020C                 | OPI1          |
| YNL297C                                          | MON2          | YDR207C                 | UME6          |
| YHR156C                                          | LIN1          | YEL060C                 | PRB1          |
| YDR443C                                          | SSN2          | YMR199W                 | CLN1          |
| YGL115W                                          | SNF4          | YDR261C                 | EXG2          |
| YKR072C                                          | SIS2          | YFL023W                 | BUD27         |
| YGL178W                                          | MPT5          | YLR452C                 | SST2          |
| YKL048C                                          | ELM1          | YGR188C                 | BUB1          |
| YBR200W                                          | BEM1          | YHR152W                 | SPO12         |
| YDR176W                                          | NGG1          | YGL252C                 | RTG2          |
| YDR335W                                          | MSN5          | YLR410W                 | VIP1          |
| YPR051W                                          | MAK3          | YHR114W                 | BZZ1          |
| YPR036W                                          | VMA13         | YGL124C                 | MON1          |
| YML071C                                          | COG8          | YNL051W                 | COG5          |

| Predictions at threshold level 0.80 continued... |               |                         |               |
|--------------------------------------------------|---------------|-------------------------|---------------|
| Gene1 of predicted pair                          |               | Gene2 of predicted pair |               |
| Systematic Name                                  | Standard Name | Systematic Name         | Standard Name |
| YML001W                                          | YPT7          | YPR046W                 | MCM16         |
| YLR095C                                          | IOC2          | YEL053C                 | MAK10         |
| YFR010W                                          | UBP6          | YNL199C                 | GCR2          |
| YIL159W                                          | BNR1          | YLR441C                 | RPS1A         |
| YGL078C                                          | DBP3          | YOR035C                 | SHE4          |
| YLR386W                                          | VAC14         | YDL083C                 | RPS16B        |
| YDR202C                                          | RAV2          | YJR040W                 | GEF1          |
| YFR031C-A                                        | RPL2A         | YDR202C                 | RAV2          |
| YDR439W                                          | LRS4          | YJR060W                 | CBF1          |
| YGL215W                                          | CLG1          | YLR131C                 | ACE2          |
| YER116C                                          | SLX8          | YNL238W                 | KEX2          |
| YER001W                                          | MNN1          | YOR035C                 | SHE4          |
| YGL124C                                          | MON1          | YDL192W                 | ARF1          |
| YLR135W                                          | SLX4          | YLR313C                 | SPH1          |
| YNL238W                                          | KEX2          | YER040W                 | GLN3          |
| YEL053C                                          | MAK10         | YMR133W                 | REC114        |
| YCR066W                                          | RAD18         | YML071C                 | COG8          |
| YGL163C                                          | RAD54         | YLR182W                 | SWI6          |
| YOR080W                                          | DIA2          | YER139C                 | YER139C       |
| YBR057C                                          | MUM2          | YNL291C                 | MID1          |
| YCR077C                                          | PAT1          | YHR167W                 | THP2          |
| YDR383C                                          | NKP1          | YLR386W                 | VAC14         |
| YLR192C                                          | HCR1          | YJR032W                 | CPR7          |
| YAL024C                                          | LTE1          | YKR061W                 | KTR2          |
| YEL065W                                          | SIT1          | YBR030W                 | YBR030W       |
| YER116C                                          | SLX8          | YBL103C                 | RTG3          |
| YEL050C                                          | RML2          | YMR202W                 | ERG2          |
| YLL039C                                          | UBI4          | YBR083W                 | TEC1          |
| YGL212W                                          | VAM7          | YER139C                 | YER139C       |

| Predictions at threshold level 0.80 continued... |               |                         |               |
|--------------------------------------------------|---------------|-------------------------|---------------|
| Gene1 of predicted pair                          |               | Gene2 of predicted pair |               |
| Systematic Name                                  | Standard Name | Systematic Name         | Standard Name |
| YOR106W                                          | VAM3          | YJL095W                 | BCK1          |
| YLR094C                                          | GIS3          | YOR327C                 | SNC2          |
| YJL151C                                          | SNA3          | YPL246C                 | RBD2          |
| YML012W                                          | ERV25         | YFL048C                 | EMP47         |
| YDR477W                                          | SNF1          | YNL238W                 | KEX2          |
| YMR016C                                          | SOK2          | YBR019C                 | GAL10         |
| YLR292C                                          | SEC72         | YJR135C                 | MCM22         |
| YDR293C                                          | SSD1          | YGL212W                 | VAM7          |
| YFR010W                                          | UBP6          | YMR142C                 | RPL13B        |
| YCL001W                                          | RER1          | YOL108C                 | INO4          |
| YGR275W                                          | RTT102        | YDR073W                 | SNF11         |
| YLR095C                                          | IOC2          | YDL083C                 | RPS16B        |
| YJL083W                                          | TAX4          | YIL002C                 | INP51         |
| YIL053W                                          | RHR2          | YLR119W                 | SRN2          |
| YKL139W                                          | CTK1          | YDR378C                 | LSM6          |
| YLR191W                                          | PEX13         | YDL065C                 | PEX19         |
| YDR378C                                          | LSM6          | YLR425W                 | TUS1          |
| YKL114C                                          | APN1          | YLR032W                 | RAD5          |
| YKL117W                                          | SBA1          | YBL079W                 | NUP170        |
| YNL288W                                          | CAF40         | YHL002W                 | HSE1          |
| YMR192W                                          | GYL1          | YNL094W                 | APP1          |
| YBR173C                                          | UMP1          | YBR171W                 | SEC66         |
| YOR195W                                          | SLK19         | YNL248C                 | RPA49         |
| YLL007C                                          | YLL007C       | YHR012W                 | VPS29         |
| YKL048C                                          | ELM1          | YNL229C                 | URE2          |
| YBL047C                                          | EDE1          | YKR048C                 | NAP1          |
| YMR224C                                          | MRE11         | YMR311C                 | GLC8          |
| YBR195C                                          | MSI1          | YER161C                 | SPT2          |
| YJL095W                                          | BCK1          | YOR014W                 | RTS1          |

| Predictions at threshold level 0.80 continued... |               |                         |               |
|--------------------------------------------------|---------------|-------------------------|---------------|
| Gene1 of predicted pair                          |               | Gene2 of predicted pair |               |
| Systematic Name                                  | Standard Name | Systematic Name         | Standard Name |
| YOR080W                                          | DIA2          | YKL114C                 | APN1          |
| YPL042C                                          | SSN3          | YJR060W                 | CBF1          |
| YLR396C                                          | VPS33         | YPL195W                 | APL5          |
| YML001W                                          | YPT7          | YGL003C                 | CDH1          |
| YJL036W                                          | SNX4          | YGR020C                 | VMA7          |
| YDL020C                                          | RPN4          | YKL048C                 | ELM1          |
| YDR363W-A                                        | SEM1          | YDR264C                 | AKR1          |
| YBR030W                                          | YBR030W       | YLR370C                 | ARC18         |
| YFR031C-A                                        | RPL2A         | YPL120W                 | VPS30         |
| YGL174W                                          | BUD13         | YPR101W                 | SNT309        |
| YNL025C                                          | SSN8          | YOR001W                 | RRP6          |
| YMR153W                                          | NUP53         | YDR137W                 | RGP1          |
| YGR040W                                          | KSS1          | YGL178W                 | MPT5          |
| YLR119W                                          | SRN2          | YBR173C                 | UMP1          |
| YPL057C                                          | SUR1          | YMR311C                 | GLC8          |
| YJL060W                                          | BNA3          | YJL006C                 | CTK2          |
| YMR153W                                          | NUP53         | YLR093C                 | NYV1          |
| YDR192C                                          | NUP42         | YBL047C                 | EDE1          |
| YDR123C                                          | INO2          | YOL108C                 | INO4          |
| YBR030W                                          | YBR030W       | YDR207C                 | UME6          |
| YKL006W                                          | RPL14A        | YBL047C                 | EDE1          |
| YJL154C                                          | VPS35         | YER096W                 | SHC1          |
| YLR090W                                          | XDJ1          | YFR036W                 | CDC26         |
| YCR066W                                          | RAD18         | YOR368W                 | RAD17         |
| YPL057C                                          | SUR1          | YDL077C                 | VAM6          |
| YLR119W                                          | SRN2          | YKL139W                 | CTK1          |
| YLR360W                                          | VPS38         | YPL256C                 | CLN2          |
| YOR008C                                          | SLG1          | YNL079C                 | TPM1          |
| YPL024W                                          | RMI1          | YHR081W                 | LRP1          |

| Predictions at threshold level 0.80 continued... |               |                         |               |
|--------------------------------------------------|---------------|-------------------------|---------------|
| Gene1 of predicted pair                          |               | Gene2 of predicted pair |               |
| Systematic Name                                  | Standard Name | Systematic Name         | Standard Name |
| YLR288C                                          | MEC3          | YBR195C                 | MSI1          |
| YPL042C                                          | SSN3          | YLR350W                 | ORM2          |
| YMR026C                                          | PEX12         | YOR043W                 | WHI2          |
| YKR072C                                          | SIS2          | YNL215W                 | IES2          |
| YMR004W                                          | MVP1          | YOR109W                 | INP53         |
| YIL140W                                          | AXL2          | YCR038C                 | BUD5          |
| YFR032C-A                                        | RPL29         | YLR371W                 | ROM2          |
| YFL013C                                          | IES1          | YBR194W                 | SOY1          |
| YHR156C                                          | LIN1          | YKR035W-A               | DID2          |
| YOR112W                                          | CEX1          | YJL004C                 | SYS1          |
| YGR159C                                          | NSR1          | YOR375C                 | GDH1          |
| YBL047C                                          | EDE1          | YHL011C                 | PRS3          |
| YHR039C-A                                        | VMA10         | YNL051W                 | COG5          |
| YLR381W                                          | CTF3          | YDR310C                 | SUM1          |
| YML016C                                          | PPZ1          | YGR252W                 | GCN5          |
| YGR019W                                          | UGA1          | YLR381W                 | CTF3          |
| YCR081W                                          | SRB8          | YPL253C                 | VIK1          |
| YHL031C                                          | GOS1          | YNL127W                 | FAR11         |
| YML102W                                          | CAC2          | YLR352W                 | YLR352W       |
| YLR386W                                          | VAC14         | YKR099W                 | BAS1          |
| YLR315W                                          | NKP2          | YDR289C                 | RTT103        |
| YGL212W                                          | VAM7          | YNL079C                 | TPM1          |
| YKL139W                                          | CTK1          | YBR036C                 | CSG2          |
| YDR477W                                          | SNF1          | YER122C                 | GLO3          |
| YFR036W                                          | CDC26         | YOL121C                 | RPS19A        |
| YJL060W                                          | BNA3          | YPL022W                 | RAD1          |
| YMR224C                                          | MRE11         | YDR192C                 | NUP42         |
| YIL036W                                          | CST6          | YDR378C                 | LSM6          |
| YDR225W                                          | HTA1          | YOR141C                 | ARP8          |

| Predictions at threshold level 0.80 continued... |               |                         |               |
|--------------------------------------------------|---------------|-------------------------|---------------|
| Gene1 of predicted pair                          |               | Gene2 of predicted pair |               |
| Systematic Name                                  | Standard Name | Systematic Name         | Standard Name |
| YHR171W                                          | ATG7          | YNR049C                 | MSO1          |
| YDR176W                                          | NGG1          | YOL145C                 | CTR9          |
| YJL053W                                          | PEP8          | YJR040W                 | GEF1          |
| YOR127W                                          | RGA1          | YNL297C                 | MON2          |
| YMR139W                                          | RIM11         | YJL106W                 | IME2          |
| YDR477W                                          | SNF1          | YHR205W                 | SCH9          |
| YMR054W                                          | STV1          | YDR310C                 | SUM1          |
| YML071C                                          | COG8          | YNR032W                 | PPG1          |
| YGL151W                                          | NUT1          | YDR310C                 | SUM1          |
| YLR119W                                          | SRN2          | YMR152W                 | YIM1          |
| YLR410W                                          | VIP1          | YIL103W                 | DPH1          |
| YOR127W                                          | RGA1          | YKR001C                 | VPS1          |
| YDR254W                                          | CHL4          | YHR114W                 | BZZ1          |
| YNL288W                                          | CAF40         | YOR127W                 | RGA1          |
| YCL001W                                          | RER1          | YPL120W                 | VPS30         |
| YGL071W                                          | AFT1          | YPL240C                 | HSP82         |
| YGL115W                                          | SNF4          | YLR410W                 | VIP1          |
| YDL160C                                          | DHH1          | YGL190C                 | CDC55         |
| YOR066W                                          | MSA1          | YDL077C                 | VAM6          |
| YOR080W                                          | DIA2          | YDR440W                 | DOT1          |
| YFR010W                                          | UBP6          | YOR195W                 | SLK19         |
| YJL095W                                          | BCK1          | YLR370C                 | ARC18         |
| YOR043W                                          | WHI2          | YBL025W                 | RRN10         |
| YNL166C                                          | BNI5          | YOR358W                 | HAP5          |
| YOR035C                                          | SHE4          | YCR053W                 | THR4          |
| YDR261C                                          | EXG2          | YDR358W                 | GGA1          |
| YNL307C                                          | MCK1          | YDL013W                 | SLX5          |
| YDL077C                                          | VAM6          | YMR311C                 | GLC8          |
| YJL053W                                          | PEP8          | YJL204C                 | RCY1          |

| Predictions at threshold level 0.80 continued... |               |                         |               |
|--------------------------------------------------|---------------|-------------------------|---------------|
| Gene1 of predicted pair                          |               | Gene2 of predicted pair |               |
| Systematic Name                                  | Standard Name | Systematic Name         | Standard Name |
| YDR171W                                          | HSP42         | YDL226C                 | GCS1          |
| YNL087W                                          | TCB2          | YDL192W                 | ARF1          |
| YGL147C                                          | RPL9A         | YNL238W                 | KEX2          |
| YPL050C                                          | MNN9          | YOR312C                 | RPL20B        |
| YLR337C                                          | VRP1          | YNL107W                 | YAF9          |
| YOR001W                                          | RRP6          | YOR308C                 | SNU66         |
| YDR484W                                          | VPS52         | YDL226C                 | GCS1          |
| YBR215W                                          | HPC2          | YGL163C                 | RAD54         |
| YML028W                                          | TSA1          | YGR188C                 | BUB1          |
| YKL048C                                          | ELM1          | YGL179C                 | TOS3          |
| YJL151C                                          | SNA3          | YBR239C                 | YBR239C       |
| YJR024C                                          | MDE1          | YLR079W                 | SIC1          |
| YGR270W                                          | YTA7          | YLR410W                 | VIP1          |
| YHL020C                                          | OPI1          | YOL018C                 | TLG2          |
| YER115C                                          | SPR6          | YMR164C                 | MSS11         |
| YPL161C                                          | BEM4          | YLR425W                 | TUS1          |
| YGL163C                                          | RAD54         | YJL006C                 | CTK2          |
| YIL076W                                          | SEC28         | YDR289C                 | RTT103        |
| YKR035W-A                                        | DID2          | YEL053C                 | MAK10         |
| YHR108W                                          | GGA2          | YDL137W                 | ARF2          |
| YJR032W                                          | CPR7          | YDL077C                 | VAM6          |
| YDL116W                                          | NUP84         | YGR270W                 | YTA7          |
| YJL183W                                          | MNN11         | YHL002W                 | HSE1          |
| YDR004W                                          | RAD57         | YHR039C-A               | VMA10         |
| YJL004C                                          | SYS1          | YDL077C                 | VAM6          |
| YBR240C                                          | THI2          | YKL139W                 | CTK1          |
| YOR270C                                          | VPH1          | YJR033C                 | RAV1          |
| YDR477W                                          | SNF1          | YNL325C                 | FIG4          |
| YLR441C                                          | RPS1A         | YPL195W                 | APL5          |

| Predictions at threshold level 0.80 continued... |               |                         |               |
|--------------------------------------------------|---------------|-------------------------|---------------|
| Gene1 of predicted pair                          |               | Gene2 of predicted pair |               |
| Systematic Name                                  | Standard Name | Systematic Name         | Standard Name |
| YHR156C                                          | LIN1          | YDR484W                 | VPS52         |
| YLR410W                                          | VIP1          | YCR086W                 | CSM1          |
| YDR484W                                          | VPS52         | YLR094C                 | GIS3          |
| YDR004W                                          | RAD57         | YLR018C                 | POM34         |
| YGR133W                                          | PEX4          | YHR013C                 | ARD1          |
| YOR140W                                          | SFL1          | YNL199C                 | GCR2          |
| YMR224C                                          | MRE11         | YMR231W                 | PEP5          |
| YGL163C                                          | RAD54         | YGL031C                 | RPL24A        |
| YOR270C                                          | VPH1          | YDR137W                 | RGP1          |
| YMR026C                                          | PEX12         | YLR370C                 | ARC18         |
| YBR127C                                          | VMA2          | YLR396C                 | VPS33         |
| YGR261C                                          | APL6          | YAL002W                 | VPS8          |
| YMR022W                                          | UBC7          | YNL051W                 | COG5          |
| YJR024C                                          | MDE1          | YMR273C                 | ZDS1          |
| YPL161C                                          | BEM4          | YOL067C                 | RTG1          |
| YMR026C                                          | PEX12         | YDR477W                 | SNF1          |
| YPL057C                                          | SUR1          | YIR005W                 | IST3          |
| YJR140C                                          | HIR3          | YDR440W                 | DOT1          |
| YOL121C                                          | RPS19A        | YPR046W                 | MCM16         |
| YCR020C-A                                        | MAK31         | YGR261C                 | APL6          |
| YNL288W                                          | CAF40         | YBR108W                 | YBR108W       |
| YNL215W                                          | IES2          | YNL264C                 | PDR17         |
| YDR225W                                          | HTA1          | YPR119W                 | CLB2          |
| YHR200W                                          | RPN10         | YLR421C                 | RPN13         |
| YDL020C                                          | RPN4          | YGR054W                 | YGR054W       |
| YGR072W                                          | UPF3          | YOR127W                 | RGA1          |
| YBR200W                                          | BEM1          | YDR155C                 | CPR1          |
| YPL140C                                          | MKK2          | YOR208W                 | PTP2          |
| YNL291C                                          | MID1          | YHR200W                 | RPN10         |



| Predictions at threshold level 0.80 continued... |               |                         |               |
|--------------------------------------------------|---------------|-------------------------|---------------|
| Gene1 of predicted pair                          |               | Gene2 of predicted pair |               |
| Systematic Name                                  | Standard Name | Systematic Name         | Standard Name |
| YGR249W                                          | MGA1          | YOR035C                 | SHE4          |
| YDR004W                                          | RAD57         | YDL020C                 | RPN4          |
| YGL133W                                          | ITC1          | YNL206C                 | RTT106        |
| YMR311C                                          | GLC8          | YDR310C                 | SUM1          |
| YKL126W                                          | YPK1          | YCR053W                 | THR4          |
| YIL076W                                          | SEC28         | YDR261C                 | EXG2          |
| YOR312C                                          | RPL20B        | YNL079C                 | TPM1          |
| YBL058W                                          | SHP1          | YBR108W                 | YBR108W       |
| YLR227C                                          | ADY4          | YNL225C                 | CNM67         |
| YJR132W                                          | NMD5          | YPR119W                 | CLB2          |
| YIL034C                                          | CAP2          | YGL252C                 | RTG2          |
| YNL069C                                          | RPL16B        | YOR132W                 | VPS17         |
| YKR072C                                          | SIS2          | YGL148W                 | ARO2          |
| YMR004W                                          | MVP1          | YAL002W                 | VPS8          |
| YOR327C                                          | SNC2          | YER122C                 | GLO3          |
| YBR019C                                          | GAL10         | YJL095W                 | BCK1          |
| YPL001W                                          | HAT1          | YKR001C                 | VPS1          |
| YFR021W                                          | ATG18         | YJR025C                 | BNA1          |
| YEL051W                                          | VMA8          | YAL002W                 | VPS8          |
| YML102W                                          | CAC2          | YMR038C                 | CCS1          |
| YOR112W                                          | CEX1          | YOR109W                 | INP53         |
| YFR031C-A                                        | RPL2A         | YJR040W                 | GEF1          |
| YDR439W                                          | LRS4          | YDR318W                 | MCM21         |
| YPL161C                                          | BEM4          | YER122C                 | GLO3          |
| YIL076W                                          | SEC28         | YEL013W                 | VAC8          |
| YML016C                                          | PPZ1          | YHR111W                 | UBA4          |
| YNL087W                                          | TCB2          | YER044C                 | ERG28         |
| YLR064W                                          | YLR064W       | YMR253C                 | YMR253C       |
| YIL053W                                          | RHR2          | YAR014C                 | BUD14         |

| Predictions at threshold level 0.80 continued... |               |                         |               |
|--------------------------------------------------|---------------|-------------------------|---------------|
| Gene1 of predicted pair                          |               | Gene2 of predicted pair |               |
| Systematic Name                                  | Standard Name | Systematic Name         | Standard Name |
| YNL297C                                          | MON2          | YDL192W                 | ARF1          |
| YNL106C                                          | INP52         | YNL225C                 | CNM67         |
| YBL102W                                          | SFT2          | YLR309C                 | IMH1          |
| YBR108W                                          | YBR108W       | YGL124C                 | MON1          |
| YNL291C                                          | MID1          | YNL107W                 | YAF9          |
| YMR109W                                          | MYO5          | YPL161C                 | BEM4          |
| YLR079W                                          | SIC1          | YFR036W                 | CDC26         |
| YBR108W                                          | YBR108W       | YGR054W                 | YGR054W       |
| YJR140C                                          | HIR3          | YGR270W                 | YTA7          |
| YDL080C                                          | THI3          | YER139C                 | YER139C       |
| YIL076W                                          | SEC28         | YCL001W                 | RER1          |
| YDR477W                                          | SNF1          | YPR119W                 | CLB2          |
| YIR025W                                          | MND2          | YDR260C                 | SWM1          |
| YER161C                                          | SPT2          | YDR289C                 | RTT103        |
| YHR108W                                          | GGA2          | YOL081W                 | IRA2          |
| YIL156W                                          | UBP7          | YCR024C-A               | PMP1          |
| YLR119W                                          | SRN2          | YOR043W                 | WHI2          |
| YGL161C                                          | YIP5          | YEL056W                 | HAT2          |
| YBR041W                                          | FAT1          | YER044C                 | ERG28         |
| YOR275C                                          | RIM20         | YPL089C                 | RLM1          |
| YCR020C-A                                        | MAK31         | YKR001C                 | VPS1          |
| YPL057C                                          | SUR1          | YER040W                 | GLN3          |
| YDL184C                                          | RPL41A        | YGL212W                 | VAM7          |
| YMR199W                                          | CLN1          | YMR052W                 | FAR3          |
| YFR031C-A                                        | RPL2A         | YPR051W                 | MAK3          |
| YGL078C                                          | DBP3          | YOR043W                 | WHI2          |
| YKL101W                                          | HSL1          | YMR038C                 | CCS1          |
| YDL020C                                          | RPN4          | YPR051W                 | MAK3          |
| YDL184C                                          | RPL41A        | YDR484W                 | VPS52         |

| Predictions at threshold level 0.80 continued... |               |                         |               |
|--------------------------------------------------|---------------|-------------------------|---------------|
| Gene1 of predicted pair                          |               | Gene2 of predicted pair |               |
| Systematic Name                                  | Standard Name | Systematic Name         | Standard Name |
| YBL103C                                          | RTG3          | YOR066W                 | MSA1          |
| YPR089W                                          | YPR089W       | YBR283C                 | SSH1          |
| YJL127C                                          | SPT10         | YLR381W                 | CTF3          |
| YMR055C                                          | BUB2          | YNL225C                 | CNM67         |
| YKL025C                                          | PAN3          | YLR234W                 | TOP3          |
| YDR245W                                          | MNN10         | YMR089C                 | YTA12         |
| YER144C                                          | UBP5          | YBL103C                 | RTG3          |
| YDR443C                                          | SSN2          | YMR224C                 | MRE11         |
| YFR010W                                          | UBP6          | YKL116C                 | PRR1          |
| YDR358W                                          | GGA1          | YDL192W                 | ARF1          |
| YOR018W                                          | ROD1          | YMR243C                 | ZRC1          |
| YMR202W                                          | ERG2          | YDR200C                 | VPS64         |
| YDL013W                                          | SLX5          | YHR013C                 | ARD1          |
| YDR484W                                          | VPS52         | YPR036W                 | VMA13         |
| YLL007C                                          | YLL007C       | YDL155W                 | CLB3          |
| YOR337W                                          | TEA1          | YPR046W                 | MCM16         |
| YMR202W                                          | ERG2          | YDR254W                 | CHL4          |
| YBR264C                                          | YPT10         | YER074W-A               | YOS1          |
| YMR224C                                          | MRE11         | YCR053W                 | THR4          |
| YBR217W                                          | ATG12         | YER044C                 | ERG28         |
| YNL166C                                          | BNI5          | YGL124C                 | MON1          |
| YPR030W                                          | CSR2          | YMR311C                 | GLC8          |
| YNL307C                                          | MCK1          | YNL116W                 | DMA2          |
| YKL010C                                          | UFD4          | YGR135W                 | PRE9          |
| YNL127W                                          | FAR11         | YKR030W                 | GMH1          |
| YGR270W                                          | YTA7          | YKL110C                 | KTI12         |
| YDL013W                                          | SLX5          | YOL090W                 | MSH2          |
| YOR023C                                          | AHC1          | YGR252W                 | GCN5          |
| YBL047C                                          | EDE1          | YNL229C                 | URE2          |

| Predictions at threshold level 0.80 continued... |               |                         |               |
|--------------------------------------------------|---------------|-------------------------|---------------|
| Gene1 of predicted pair                          |               | Gene2 of predicted pair |               |
| Systematic Name                                  | Standard Name | Systematic Name         | Standard Name |
| YER129W                                          | SAK1          | YPL256C                 | CLN2          |
| YPR131C                                          | NAT3          | YPL018W                 | CTF19         |
| YFR010W                                          | UBP6          | YFR036W                 | CDC26         |
| YBR194W                                          | SOY1          | YKL213C                 | DOA1          |
| YJL058C                                          | BIT61         | YDR318W                 | MCM21         |
| YKR101W                                          | SIR1          | YBR009C                 | HHF1          |
| YBL021C                                          | HAP3          | YEL053C                 | MAK10         |
| YLR094C                                          | GIS3          | YOR035C                 | SHE4          |
| YLR095C                                          | IOC2          | YBR173C                 | UMP1          |
| YER107C                                          | GLE2          | YML103C                 | NUP188        |
| YGL025C                                          | PGD1          | YDR207C                 | UME6          |
| YHR039C-A                                        | VMA10         | YMR230W                 | RPS10B        |
| YLR018C                                          | POM34         | YDR137W                 | RGP1          |
| YLR090W                                          | XDJ1          | YDL223C                 | HBT1          |
| YBL103C                                          | RTG3          | YMR152W                 | YIM1          |
| YNL215W                                          | IES2          | YEL056W                 | HAT2          |
| YBR126C                                          | TPS1          | YDL192W                 | ARF1          |
| YER120W                                          | SCS2          | YMR054W                 | STV1          |
| YDR448W                                          | ADA2          | YPL248C                 | GAL4          |
| YPR120C                                          | CLB5          | YDR318W                 | MCM21         |
| YHR205W                                          | SCH9          | YOR008C                 | SLG1          |
| YLR410W                                          | VIP1          | YOL081W                 | IRA2          |
| YDR439W                                          | LRS4          | YJL124C                 | LSM1          |
| YJL004C                                          | SYS1          | YHR016C                 | YSC84         |
| YBL008W                                          | HIR1          | YGR252W                 | GCN5          |
| YBR131W                                          | CCZ1          | YMR231W                 | PEP5          |
| YLR315W                                          | NKP2          | YCR077C                 | PAT1          |
| YPL057C                                          | SUR1          | YMR055C                 | BUB2          |
| YLR320W                                          | MMS22         | YFR036W                 | CDC26         |

| Predictions at threshold level 0.80 continued... |               |                         |               |
|--------------------------------------------------|---------------|-------------------------|---------------|
| Gene1 of predicted pair                          |               | Gene2 of predicted pair |               |
| Systematic Name                                  | Standard Name | Systematic Name         | Standard Name |
| YML103C                                          | NUP188        | YOL126C                 | MDH2          |
| YPR051W                                          | MAK3          | YAR014C                 | BUD14         |
| YLR292C                                          | SEC72         | YLR386W                 | VAC14         |
| YLR094C                                          | GIS3          | YGL115W                 | SNF4          |
| YGL178W                                          | MPT5          | YBR200W                 | BEM1          |
| YDL065C                                          | PEX19         | YGR077C                 | PEX8          |
| YJL095W                                          | BCK1          | YNL090W                 | RHO2          |
| YMR016C                                          | SOK2          | YMR230W                 | RPS10B        |
| YDL161W                                          | ENT1          | YDL226C                 | GCS1          |
| YPR029C                                          | APL4          | YDL006W                 | PTC1          |
| YLR170C                                          | APS1          | YOR069W                 | VPS5          |
| YJR024C                                          | MDE1          | YNL199C                 | GCR2          |
| YPR189W                                          | SKI3          | YPR119W                 | CLB2          |
| YML071C                                          | COG8          | YEL042W                 | GDA1          |
| YMR055C                                          | BUB2          | YJR135C                 | MCM22         |
| YIL105C                                          | SLM1          | YJL058C                 | BIT61         |
| YDR293C                                          | SSD1          | YNL288W                 | CAF40         |
| YPL105C                                          | YPL105C       | YEL051W                 | VMA8          |
| YLR018C                                          | POM34         | YBR042C                 | CST26         |
| YCR086W                                          | CSM1          | YLR233C                 | EST1          |
| YFR010W                                          | UBP6          | YGL025C                 | PGD1          |
| YMR224C                                          | MRE11         | YAR014C                 | BUD14         |
| YDR293C                                          | SSD1          | YJL190C                 | RPS22A        |
| YDR254W                                          | CHL4          | YGL124C                 | MON1          |
| YNL238W                                          | KEX2          | YJR033C                 | RAV1          |
| YBR200W                                          | BEM1          | YPL234C                 | TFP3          |
| YOR337W                                          | TEA1          | YPL137C                 | GIP3          |
| YLR093C                                          | NYV1          | YFL048C                 | EMP47         |
| YMR026C                                          | PEX12         | YER122C                 | GLO3          |

| Predictions at threshold level 0.80 continued... |               |                         |               |
|--------------------------------------------------|---------------|-------------------------|---------------|
| Gene1 of predicted pair                          |               | Gene2 of predicted pair |               |
| Systematic Name                                  | Standard Name | Systematic Name         | Standard Name |
| YBR200W                                          | BEM1          | YDR310C                 | SUM1          |
| YHR134W                                          | WSS1          | YGL175C                 | SAE2          |
| YMR054W                                          | STV1          | YDR153C                 | ENT5          |
| YPL234C                                          | TFP3          | YJL183W                 | MNN11         |
| YNL215W                                          | IES2          | YCL037C                 | SRO9          |
| YDR174W                                          | HMO1          | YNL116W                 | DMA2          |
| YFL023W                                          | BUD27         | YKL048C                 | ELM1          |
| YIL159W                                          | BNR1          | YBL051C                 | PIN4          |
| YHL020C                                          | OPI1          | YDL077C                 | VAM6          |
| YLR288C                                          | MEC3          | YJL138C                 | TIF2          |
| YLR254C                                          | NDL1          | YGL252C                 | RTG2          |
| YLR360W                                          | VPS38         | YOR109W                 | INP53         |
| YOL145C                                          | CTR9          | YGL025C                 | PGD1          |
| YJR063W                                          | RPA12         | YER068W                 | MOT2          |
| YDR156W                                          | RPA14         | YOR032C                 | HMS1          |
| YIL034C                                          | CAP2          | YGL212W                 | VAM7          |
| YGL135W                                          | RPL1B         | YBR042C                 | CST26         |
| YJL210W                                          | PEX2          | YAL055W                 | PEX22         |
| YJL136C                                          | RPS21B        | YDL047W                 | SIT4          |
| YNL248C                                          | RPA49         | YKL048C                 | ELM1          |
| YBR260C                                          | RGD1          | YLR425W                 | TUS1          |
| YLR192C                                          | HCR1          | YDL184C                 | RPL41A        |
| YDR477W                                          | SNF1          | YBR260C                 | RGD1          |
| YGL147C                                          | RPL9A         | YIL159W                 | BNR1          |
| YDR484W                                          | VPS52         | YKR035W-A               | DID2          |
| YKR072C                                          | SIS2          | YOR368W                 | RAD17         |
| YDR443C                                          | SSN2          | YGL124C                 | MON1          |
| YFR010W                                          | UBP6          | YBR194W                 | SOY1          |
| YCL037C                                          | SRO9          | YOR308C                 | SNU66         |

| Predictions at threshold level 0.80 continued... |               |                         |               |
|--------------------------------------------------|---------------|-------------------------|---------------|
| Gene1 of predicted pair                          |               | Gene2 of predicted pair |               |
| Systematic Name                                  | Standard Name | Systematic Name         | Standard Name |
| YDR293C                                          | SSD1          | YJL004C                 | SYS1          |
| YPL246C                                          | RBD2          | YKR030W                 | GMH1          |
| YPL049C                                          | DIG1          | YBR083W                 | TEC1          |
| YCR024C-A                                        | PMP1          | YMR125W                 | STO1          |
| YMR095C                                          | SNO1          | YDR358W                 | GGA1          |
| YBR107C                                          | IML3          | YIR005W                 | IST3          |
| YJR056C                                          | YJR056C       | YNL041C                 | COG6          |
| YOR270C                                          | VPH1          | YOR035C                 | SHE4          |
| YBR173C                                          | UMP1          | YOL111C                 | MDY2          |
| YIL002C                                          | INP51         | YDL161W                 | ENT1          |
| YPL246C                                          | RBD2          | YOR284W                 | HUA2          |
| YPR119W                                          | CLB2          | YLR032W                 | RAD5          |
| YGL200C                                          | EMP24         | YLR131C                 | ACE2          |
| YGR188C                                          | BUB1          | YNL225C                 | CNM67         |
| YGL016W                                          | KAP122        | YKL068W                 | NUP100        |
| YER162C                                          | RAD4          | YDR358W                 | GGA1          |
| YDL223C                                          | HBT1          | YJL095W                 | BCK1          |
| YDR137W                                          | RGP1          | YDL077C                 | VAM6          |
| YML001W                                          | YPT7          | YBR280C                 | SAF1          |
| YDL002C                                          | NHP10         | YHR167W                 | THP2          |
| YBR194W                                          | SOY1          | YBR200W                 | BEM1          |
| YBR173C                                          | UMP1          | YOR035C                 | SHE4          |
| YDR477W                                          | SNF1          | YPR036W                 | VMA13         |
| YLR360W                                          | VPS38         | YDR207C                 | UME6          |
| YOR332W                                          | VMA4          | YKL119C                 | VPH2          |
| YMR224C                                          | MRE11         | YDL155W                 | CLB3          |
| YNL288W                                          | CAF40         | YEL053C                 | MAK10         |
| YCR020C-A                                        | MAK31         | YOR132W                 | VPS17         |
| YPL022W                                          | RAD1          | YGL094C                 | PAN2          |

| Predictions at threshold level 0.80 continued... |               |                         |               |
|--------------------------------------------------|---------------|-------------------------|---------------|
| Gene1 of predicted pair                          |               | Gene2 of predicted pair |               |
| Systematic Name                                  | Standard Name | Systematic Name         | Standard Name |
| YLR292C                                          | SEC72         | YAL002W                 | VPS8          |
| YPL152W                                          | RRD2          | YPR119W                 | CLB2          |
| YER139C                                          | YER139C       | YLR180W                 | SAM1          |
| YLR292C                                          | SEC72         | YJL095W                 | BCK1          |
| YBL102W                                          | SFT2          | YDR108W                 | GSG1          |
| YBR171W                                          | SEC66         | YPL037C                 | EGD1          |
| YJR056C                                          | YJR056C       | YHR039C-A               | VMA10         |
| YGR054W                                          | YGR054W       | YJR135C                 | MCM22         |
| YGL237C                                          | HAP2          | YMR055C                 | BUB2          |
| YMR311C                                          | GLC8          | YLR370C                 | ARC18         |
| YHR111W                                          | UBA4          | YJR032W                 | CPR7          |
| YPR018W                                          | RLF2          | YOL110W                 | SHR5          |
| YGL250W                                          | RMR1          | YPR046W                 | MCM16         |
| YJL176C                                          | SWI3          | YCR077C                 | PAT1          |
| YGL115W                                          | SNF4          | YDL047W                 | SIT4          |
| YNL215W                                          | IES2          | YHL031C                 | GOS1          |
| YER139C                                          | YER139C       | YDL192W                 | ARF1          |
| YOR033C                                          | EXO1          | YJL124C                 | LSM1          |
| YML001W                                          | YPT7          | YMR230W                 | RPS10B        |
| YDR477W                                          | SNF1          | YDL077C                 | VAM6          |
| YDR383C                                          | NKP1          | YJR063W                 | RPA12         |
| YKL006W                                          | RPL14A        | YBL072C                 | RPS8A         |
| YFR031C-A                                        | RPL2A         | YER120W                 | SCS2          |
| YLR410W                                          | VIP1          | YNL107W                 | YAF9          |
| YER044C                                          | ERG28         | YEL053C                 | MAK10         |
| YCR088W                                          | ABP1          | YOR284W                 | HUA2          |
| YNL135C                                          | FPR1          | YDR155C                 | CPR1          |
| YPL001W                                          | HAT1          | YDL002C                 | NHP10         |
| YGL019W                                          | CKB1          | YPR119W                 | CLB2          |



| Predictions at threshold level 0.80 continued... |               |                         |               |
|--------------------------------------------------|---------------|-------------------------|---------------|
| Gene1 of predicted pair                          |               | Gene2 of predicted pair |               |
| Systematic Name                                  | Standard Name | Systematic Name         | Standard Name |
| YLL039C                                          | UBI4          | YDR440W                 | DOT1          |
| YHL031C                                          | GOS1          | YBR215W                 | HPC2          |
| YFR031C-A                                        | RPL2A         | YPR032W                 | SRO7          |
| YFR010W                                          | UBP6          | YER161C                 | SPT2          |
| YGR135W                                          | PRE9          | YOR035C                 | SHE4          |
| YOR080W                                          | DIA2          | YGR105W                 | VMA21         |
| YHR039C-A                                        | VMA10         | YKL080W                 | VMA5          |
| YOR038C                                          | HIR2          | YLR350W                 | ORM2          |
| YML103C                                          | NUP188        | YDR378C                 | LSM6          |
| YGL212W                                          | VAM7          | YBL047C                 | EDE1          |
| YIL033C                                          | BCY1          | YLR206W                 | ENT2          |
| YOR001W                                          | RRP6          | YDR440W                 | DOT1          |
| YPR084W                                          | YPR084W       | YOR080W                 | DIA2          |
| YPL161C                                          | BEM4          | YJR032W                 | CPR7          |
| YMR179W                                          | SPT21         | YGL003C                 | CDH1          |
| YOR076C                                          | SKI7          | YPL024W                 | RMI1          |
| YCR020C-A                                        | MAK31         | YOR109W                 | INP53         |
| YDR156W                                          | RPA14         | YML117W                 | NAB6          |
| YPL253C                                          | VIK1          | YOR014W                 | RTS1          |
| YDL077C                                          | VAM6          | YKL119C                 | VPH2          |
| YIR005W                                          | IST3          | YJR135C                 | MCM22         |
| YNL041C                                          | COG6          | YLR309C                 | IMH1          |
| YOR270C                                          | VPH1          | YER139C                 | YER139C       |
| YLL039C                                          | UBI4          | YDR477W                 | SNF1          |
| YMR172W                                          | HOT1          | YLR234W                 | TOP3          |
| YHR134W                                          | WSS1          | YER110C                 | KAP123        |
| YGL060W                                          | YBP2          | YJL058C                 | BIT61         |
| YGL066W                                          | SGF73         | YBR107C                 | IML3          |
| YEL065W                                          | SIT1          | YBR171W                 | SEC66         |

| Predictions at threshold level 0.80 continued... |               |                         |               |
|--------------------------------------------------|---------------|-------------------------|---------------|
| Gene1 of predicted pair                          |               | Gene2 of predicted pair |               |
| Systematic Name                                  | Standard Name | Systematic Name         | Standard Name |
| YCL037C                                          | SRO9          | YML071C                 | COG8          |
| YLR094C                                          | GIS3          | YPR046W                 | MCM16         |
| YDR443C                                          | SSN2          | YBR171W                 | SEC66         |
| YML041C                                          | VPS71         | YGL094C                 | PAN2          |
| YDR225W                                          | HTA1          | YLR399C                 | BDF1          |
| YGR261C                                          | APL6          | YCL001W                 | RER1          |
| YMR224C                                          | MRE11         | YOL090W                 | MSH2          |
| YPR171W                                          | BSP1          | YHR016C                 | YSC84         |
| YNL307C                                          | MCK1          | YKR035W-A               | DID2          |
| YJR040W                                          | GEF1          | YDL006W                 | PTC1          |
| YPR131C                                          | NAT3          | YML095C                 | RAD10         |
| YLR119W                                          | SRN2          | YNL087W                 | TCB2          |
| YPL120W                                          | VPS30         | YNL107W                 | YAF9          |
| YFR031C-A                                        | RPL2A         | YOR112W                 | CEX1          |
| YML038C                                          | YMD8          | YEL051W                 | VMA8          |
| YGL115W                                          | SNF4          | YJR135C                 | MCM22         |
| YMR167W                                          | MLH1          | YNL082W                 | PMS1          |
| YGR268C                                          | HUA1          | YKR030W                 | GMH1          |
| YDR080W                                          | VPS41         | YEL053C                 | MAK10         |
| YOR327C                                          | SNC2          | YDR310C                 | SUM1          |
| YDR443C                                          | SSN2          | YMR016C                 | SOK2          |
| YNL025C                                          | SSN8          | YNL199C                 | GCR2          |
| YLR234W                                          | TOP3          | YDR155C                 | CPR1          |
| YGL178W                                          | MPT5          | YER016W                 | BIM1          |
| YLR079W                                          | SIC1          | YDR335W                 | MSN5          |
| YGL208W                                          | SIP2          | YGL115W                 | SNF4          |
| YDL192W                                          | ARF1          | YER040W                 | GLN3          |
| YLR150W                                          | STM1          | YFR036W                 | CDC26         |
| YPR131C                                          | NAT3          | YLR381W                 | CTF3          |

| Predictions at threshold level 0.80 continued... |               |                         |               |
|--------------------------------------------------|---------------|-------------------------|---------------|
| Gene1 of predicted pair                          |               | Gene2 of predicted pair |               |
| Systematic Name                                  | Standard Name | Systematic Name         | Standard Name |
| YML058W                                          | SML1          | YDR071C                 | PAA1          |
| YMR139W                                          | RIM11         | YJR094C                 | IME1          |
| YGR261C                                          | APL6          | YGL212W                 | VAM7          |
| YNL058C                                          | YNL058C       | YOL081W                 | IRA2          |
| YHR200W                                          | RPN10         | YLR093C                 | NYV1          |
| YGR081C                                          | SLX9          | YJR090C                 | GRR1          |
| YBL051C                                          | PIN4          | YDL155W                 | CLB3          |
| YGL087C                                          | MMS2          | YFR010W                 | UBP6          |
| YHR103W                                          | SBE22         | YFR021W                 | ATG18         |
| YGL135W                                          | RPL1B         | YLR061W                 | RPL22A        |
| YDR392W                                          | SPT3          | YER107C                 | GLE2          |
| YJL036W                                          | SNX4          | YNL297C                 | MON2          |
| YGL208W                                          | SIP2          | YDR028C                 | REG1          |
| YLR337C                                          | VRP1          | YMR055C                 | BUB2          |
| YOR080W                                          | DIA2          | YPL057C                 | SUR1          |
| YJL176C                                          | SWI3          | YCL037C                 | SRO9          |
| YOR043W                                          | WHI2          | YPL256C                 | CLN2          |
| YLR119W                                          | SRN2          | YBR036C                 | CSG2          |
| YER161C                                          | SPT2          | YGL148W                 | ARO2          |
| YDR443C                                          | SSN2          | YKR035W-A               | DID2          |
| YBR274W                                          | CHK1          | YOL081W                 | IRA2          |
| YNL166C                                          | BNI5          | YDR318W                 | MCM21         |
| YDR295C                                          | HDA2          | YEL043W                 | YEL043W       |
| YFR010W                                          | UBP6          | YLR180W                 | SAM1          |
| YKL139W                                          | CTK1          | YLR399C                 | BDF1          |
| YLR192C                                          | HCR1          | YIL076W                 | SEC28         |
| YBR107C                                          | IML3          | YKL048C                 | ELM1          |
| YER144C                                          | UBP5          | YHR200W                 | RPN10         |
| YOR337W                                          | TEA1          | YLR441C                 | RPS1A         |

| Predictions at threshold level 0.80 continued... |               |                         |               |
|--------------------------------------------------|---------------|-------------------------|---------------|
| Gene1 of predicted pair                          |               | Gene2 of predicted pair |               |
| Systematic Name                                  | Standard Name | Systematic Name         | Standard Name |
| YPL057C                                          | SUR1          | YCR077C                 | PAT1          |
| YLR234W                                          | TOP3          | YHR178W                 | STB5          |
| YDL155W                                          | CLB3          | YPR046W                 | MCM16         |
| YHR013C                                          | ARD1          | YKL041W                 | VPS24         |
| YLR386W                                          | VAC14         | YKL101W                 | HSL1          |
| YBR260C                                          | RGD1          | YNL079C                 | TPM1          |
| YPR018W                                          | RLF2          | YML102W                 | CAC2          |
| YGL115W                                          | SNF4          | YFR036W                 | CDC26         |
| YDR254W                                          | CHL4          | YLR370C                 | ARC18         |
| YLR018C                                          | POM34         | YER110C                 | KAP123        |
| YGL124C                                          | MON1          | YHR115C                 | DMA1          |
| YCR065W                                          | HCM1          | YGL124C                 | MON1          |
| YLR337C                                          | VRP1          | YLR370C                 | ARC18         |
| YKL048C                                          | ELM1          | YOR275C                 | RIM20         |
| YKL116C                                          | PRR1          | YMR142C                 | RPL13B        |
| YEL053C                                          | MAK10         | YHL020C                 | OPI1          |
| YGL178W                                          | MPT5          | YLR182W                 | SWI6          |
| YDR289C                                          | RTT103        | YJL190C                 | RPS22A        |
| YOR290C                                          | SNF2          | YEL060C                 | PRB1          |
| YMR224C                                          | MRE11         | YGL078C                 | DBP3          |
| YPR051W                                          | MAK3          | YBR171W                 | SEC66         |
| YPR018W                                          | RLF2          | YPL018W                 | CTF19         |
| YHR111W                                          | UBA4          | YNL289W                 | PCL1          |
| YIL159W                                          | BNR1          | YMR224C                 | MRE11         |
| YOR195W                                          | SLK19         | YML016C                 | PPZ1          |
| YJR135C                                          | MCM22         | YGL151W                 | NUT1          |
| YMR199W                                          | CLN1          | YGL175C                 | SAE2          |
| YDR225W                                          | HTA1          | YBL002W                 | HTB2          |
| YLR083C                                          | EMP70         | YGR020C                 | VMA7          |

| Predictions at threshold level 0.80 continued... |               |                         |               |
|--------------------------------------------------|---------------|-------------------------|---------------|
| Gene1 of predicted pair                          |               | Gene2 of predicted pair |               |
| Systematic Name                                  | Standard Name | Systematic Name         | Standard Name |
| YBR131W                                          | CCZ1          | YOL018C                 | TLG2          |
| YGL078C                                          | DBP3          | YKL048C                 | ELM1          |
| YHR200W                                          | RPN10         | YGR135W                 | PRE9          |
| YBR194W                                          | SOY1          | YLR350W                 | ORM2          |
| YJL036W                                          | SNX4          | YOR106W                 | VAM3          |
| YBR030W                                          | YBR030W       | YNL307C                 | MCK1          |
| YOR109W                                          | INP53         | YNL127W                 | FAR11         |
| YIL159W                                          | BNR1          | YJL095W                 | BCK1          |
| YPL234C                                          | TFP3          | YLR309C                 | IMH1          |
| YDR443C                                          | SSN2          | YER096W                 | SHC1          |
| YLR360W                                          | VPS38         | YDR245W                 | MNN10         |
| YNL166C                                          | BNI5          | YGL253W                 | HXK2          |
| YDR379W                                          | RGA2          | YGR152C                 | RSR1          |
| YKL048C                                          | ELM1          | YDL083C                 | RPS16B        |
| YPL001W                                          | HAT1          | YCR086W                 | CSM1          |
| YER087C-B                                        | SBH1          | YOR085W                 | OST3          |
| YNL201C                                          | PSY2          | YGR270W                 | YTA7          |
| YDR004W                                          | RAD57         | YDR254W                 | CHL4          |
| YGL066W                                          | SGF73         | YPR036W                 | VMA13         |
| YDR264C                                          | AKR1          | YNL116W                 | DMA2          |
| YDL020C                                          | RPN4          | YBL051C                 | PIN4          |
| YKL110C                                          | KTI12         | YOL054W                 | PSH1          |
| YPL049C                                          | DIG1          | YHR084W                 | STE12         |
| YLR079W                                          | SIC1          | YHR111W                 | UBA4          |
| YJL177W                                          | RPL17B        | YPL240C                 | HSP82         |
| YNL253W                                          | TEX1          | YCL011C                 | GBP2          |
| YBR173C                                          | UMP1          | YHR156C                 | LIN1          |
| YJL154C                                          | VPS35         | YNL238W                 | KEX2          |
| YLL007C                                          | YLL007C       | YJR032W                 | CPR7          |

| Predictions at threshold level 0.80 continued... |               |                         |               |
|--------------------------------------------------|---------------|-------------------------|---------------|
| Gene1 of predicted pair                          |               | Gene2 of predicted pair |               |
| Systematic Name                                  | Standard Name | Systematic Name         | Standard Name |
| YGL054C                                          | ERV14         | YAL002W                 | VPS8          |
| YDR335W                                          | MSN5          | YER161C                 | SPT2          |
| YJL157C                                          | FAR1          | YGL003C                 | CDH1          |
| YBR019C                                          | GAL10         | YMR311C                 | GLC8          |
| YOR066W                                          | MSA1          | YDR358W                 | GGA1          |
| YOR066W                                          | MSA1          | YFR036W                 | CDC26         |
| YDL155W                                          | CLB3          | YCR077C                 | PAT1          |
| YKR020W                                          | VPS51         | YDR309C                 | GIC2          |
| YKR001C                                          | VPS1          | YPR032W                 | SRO7          |
| YOR195W                                          | SLK19         | YNL054W                 | VAC7          |
| YGL223C                                          | COG1          | YPL120W                 | VPS30         |
| YDR245W                                          | MNN10         | YHR167W                 | THP2          |
| YMR026C                                          | PEX12         | YKR099W                 | BAS1          |
| YLR337C                                          | VRP1          | YBR082C                 | UBC4          |
| YDR137W                                          | RGP1          | YER139C                 | YER139C       |
| YBR057C                                          | MUM2          | YFR036W                 | CDC26         |
| YBL047C                                          | EDE1          | YAL002W                 | VPS8          |
| YLR102C                                          | APC9          | YJL095W                 | BCK1          |
| YOR039W                                          | CKB2          | YJL138C                 | TIF2          |
| YNL291C                                          | MID1          | YNL307C                 | MCK1          |
| YNL307C                                          | MCK1          | YFR036W                 | CDC26         |
| YPL253C                                          | VIK1          | YAL002W                 | VPS8          |
| YPL253C                                          | VIK1          | YGR054W                 | YGR054W       |
| YER096W                                          | SHC1          | YPL161C                 | BEM4          |
| YBR030W                                          | YBR030W       | YML071C                 | COG8          |
| YCR024C-A                                        | PMP1          | YBL079W                 | NUP170        |
| YPL037C                                          | EGD1          | YJL095W                 | BCK1          |
| YAL024C                                          | LTE1          | YMR055C                 | BUB2          |
| YMR179W                                          | SPT21         | YML016C                 | PPZ1          |

| Predictions at threshold level 0.80 continued... |               |                         |               |
|--------------------------------------------------|---------------|-------------------------|---------------|
| Gene1 of predicted pair                          |               | Gene2 of predicted pair |               |
| Systematic Name                                  | Standard Name | Systematic Name         | Standard Name |
| YMR224C                                          | MRE11         | YBL103C                 | RTG3          |
| YHR156C                                          | LIN1          | YBR108W                 | YBR108W       |
| YKL139W                                          | CTK1          | YPL152W                 | RRD2          |
| YFR032C-A                                        | RPL29         | YBR131W                 | CCZ1          |
| YBR173C                                          | UMP1          | YLR032W                 | RAD5          |
| YDR443C                                          | SSN2          | YPL253C                 | VIK1          |
| YDR245W                                          | MNN10         | YOR141C                 | ARP8          |
| YDR439W                                          | LRS4          | YPL018W                 | CTF19         |
| YHL027W                                          | RIM101        | YLR370C                 | ARC18         |
| YPL057C                                          | SUR1          | YGL124C                 | MON1          |
| YLR079W                                          | SIC1          | YHR115C                 | DMA1          |
| YFR036W                                          | CDC26         | YLR370C                 | ARC18         |
| YML001W                                          | YPT7          | YEL060C                 | PRB1          |
| YHR060W                                          | VMA22         | YOL121C                 | RPS19A        |
| YKR001C                                          | VPS1          | YDR310C                 | SUM1          |
| YPR120C                                          | CLB5          | YBR036C                 | CSG2          |
| YLR234W                                          | TOP3          | YJR090C                 | GRR1          |
| YDR484W                                          | VPS52         | YLR398C                 | SKI2          |
| YNL032W                                          | SIW14         | YHL011C                 | PRS3          |
| YLR381W                                          | CTF3          | YNL147W                 | LSM7          |
| YPL024W                                          | RMI1          | YOL121C                 | RPS19A        |
| YMR205C                                          | PFK2          | YLR371W                 | ROM2          |
| YMR133W                                          | REC114        | YGL003C                 | CDH1          |
| YNR052C                                          | POP2          | YJL124C                 | LSM1          |
| YJL176C                                          | SWI3          | YDR137W                 | RGP1          |
| YJL183W                                          | MNN11         | YGL253W                 | HXK2          |
| YLR093C                                          | NYV1          | YNR007C                 | ATG3          |
| YGL223C                                          | COG1          | YAR014C                 | BUD14         |
| YDR289C                                          | RTT103        | YEL056W                 | HAT2          |

| Predictions at threshold level 0.80 continued... |               |                         |               |
|--------------------------------------------------|---------------|-------------------------|---------------|
| Gene1 of predicted pair                          |               | Gene2 of predicted pair |               |
| Systematic Name                                  | Standard Name | Systematic Name         | Standard Name |
| YDL116W                                          | NUP84         | YOR195W                 | SLK19         |
| YGL147C                                          | RPL9A         | YBR108W                 | YBR108W       |
| YBR200W                                          | BEM1          | YDR183W                 | PLP1          |
| YBR107C                                          | IML3          | YBR114W                 | RAD16         |
| YLL007C                                          | YLL007C       | YDR289C                 | RTT103        |
| YNL238W                                          | KEX2          | YLR306W                 | UBC12         |
| YDR245W                                          | MNN10         | YDR310C                 | SUM1          |
| YGR270W                                          | YTA7          | YJL006C                 | CTK2          |
| YPR171W                                          | BSP1          | YKL204W                 | EAP1          |
| YJL157C                                          | FAR1          | YDL047W                 | SIT4          |
| YDR254W                                          | CHL4          | YJL183W                 | MNN11         |
| YGL223C                                          | COG1          | YDL192W                 | ARF1          |
| YPL037C                                          | EGD1          | YPR046W                 | MCM16         |
| YDL006W                                          | PTC1          | YOL108C                 | INO4          |
| YOR109W                                          | INP53         | YHR039C-A               | VMA10         |
| YER044C                                          | ERG28         | YJL183W                 | MNN11         |
| YJR040W                                          | GEF1          | YHR060W                 | VMA22         |
| YHR013C                                          | ARD1          | YGL163C                 | RAD54         |
| YKR072C                                          | SIS2          | YDR146C                 | SWI5          |
| YMR172W                                          | HOT1          | YJR135C                 | MCM22         |
| YDR261C                                          | EXG2          | YLR370C                 | ARC18         |
| YPL256C                                          | CLN2          | YBL087C                 | RPL23A        |
| YGR072W                                          | UPF3          | YGR071C                 | YGR071C       |
| YMR224C                                          | MRE11         | YIR002C                 | MPH1          |
| YDL116W                                          | NUP84         | YAL024C                 | LTE1          |
| YDR265W                                          | PEX10         | YNL214W                 | PEX17         |
| YHR060W                                          | VMA22         | YPL120W                 | VPS30         |
| YIL159W                                          | BNR1          | YEL060C                 | PRB1          |
| YPR046W                                          | MCM16         | YAL002W                 | VPS8          |



| Predictions at threshold level 0.80 continued... |               |                         |               |
|--------------------------------------------------|---------------|-------------------------|---------------|
| Gene1 of predicted pair                          |               | Gene2 of predicted pair |               |
| Systematic Name                                  | Standard Name | Systematic Name         | Standard Name |
| YGL033W                                          | HOP2          | YBL103C                 | RTG3          |
| YJR056C                                          | YJR056C       | YDR358W                 | GGA1          |
| YBL008W                                          | HIR1          | YDR318W                 | MCM21         |
| YBL102W                                          | SFT2          | YCL037C                 | SRO9          |
| YML007W                                          | YAP1          | YGL208W                 | SIP2          |
| YNL117W                                          | MLS1          | YCR086W                 | CSM1          |
| YLR360W                                          | VPS38         | YPR051W                 | MAK3          |
| YBR171W                                          | SEC66         | YOR066W                 | MSA1          |
| YJR060W                                          | CBF1          | YDR318W                 | MCM21         |
| YDR137W                                          | RGP1          | YEL042W                 | GDA1          |
| YLR337C                                          | VRP1          | YKR014C                 | YPT52         |
| YDR129C                                          | SAC6          | YBL101C                 | ECM21         |
| YOR197W                                          | MCA1          | YPL112C                 | PEX25         |
| YBR108W                                          | YBR108W       | YLR381W                 | CTF3          |
| YPL096C-A                                        | ERI1          | YLR370C                 | ARC18         |
| YDL116W                                          | NUP84         | YNR052C                 | POP2          |
| YLR447C                                          | VMA6          | YGR054W                 | YGR054W       |
| YGL161C                                          | YIP5          | YOR213C                 | SAS5          |
| YLR018C                                          | POM34         | YMR153W                 | NUP53         |
| YFR031C-A                                        | RPL2A         | YLR094C                 | GIS3          |
| YLR006C                                          | SSK1          | YDR379W                 | RGA2          |
| YCR088W                                          | ABP1          | YKR001C                 | VPS1          |
| YBR173C                                          | UMP1          | YOR043W                 | WHI2          |
| YGR249W                                          | MGA1          | YDR137W                 | RGP1          |
| YFR010W                                          | UBP6          | YBR228W                 | SLX1          |
| YDL127W                                          | PCL2          | YFR034C                 | PHO4          |
| YKL139W                                          | CTK1          | YDR363W-A               | SEM1          |
| YGL198W                                          | YIP4          | YNR049C                 | MSO1          |
| YML071C                                          | COG8          | YJL095W                 | BCK1          |

| Predictions at threshold level 0.80 continued... |               |                         |               |
|--------------------------------------------------|---------------|-------------------------|---------------|
| Gene1 of predicted pair                          |               | Gene2 of predicted pair |               |
| Systematic Name                                  | Standard Name | Systematic Name         | Standard Name |
| YJR035W                                          | RAD26         | YDR207C                 | UME6          |
| YOR043W                                          | WHI2          | YNL079C                 | TPM1          |
| YKL048C                                          | ELM1          | YGL019W                 | CKB1          |
| YPL137C                                          | GIP3          | YPR030W                 | CSR2          |
| YBL103C                                          | RTG3          | YOL121C                 | RPS19A        |
| YGR268C                                          | HUA1          | YHR016C                 | YSC84         |
| YBR171W                                          | SEC66         | YNL107W                 | YAF9          |
| YGR020C                                          | VMA7          | YPL120W                 | VPS30         |
| YLR370C                                          | ARC18         | YDR310C                 | SUM1          |
| YML016C                                          | PPZ1          | YMR109W                 | MYO5          |
| YDR080W                                          | VPS41         | YJR040W                 | GEF1          |
| YIL076W                                          | SEC28         | YLR094C                 | GIS3          |
| YJL029C                                          | VPS53         | YGL198W                 | YIP4          |
| YJL124C                                          | LSM1          | YEL056W                 | HAT2          |
| YMR224C                                          | MRE11         | YIL036W                 | CST6          |
| YFR010W                                          | UBP6          | YEL053C                 | MAK10         |
| YPR051W                                          | MAK3          | YJL190C                 | RPS22A        |
| YNL139C                                          | RLR1          | YBR111W-A               | SUS1          |
| YLR381W                                          | CTF3          | YNL248C                 | RPA49         |
| YMR004W                                          | MVP1          | YJR060W                 | CBF1          |
| YPL253C                                          | VIK1          | YDR363W-A               | SEM1          |
| YGL212W                                          | VAM7          | YDR261C                 | EXG2          |
| YML115C                                          | VAN1          | YNL238W                 | KEX2          |
| YPR131C                                          | NAT3          | YMR199W                 | CLN1          |
| YGR108W                                          | CLB1          | YDR254W                 | CHL4          |
| YPR018W                                          | RLF2          | YDL155W                 | CLB3          |
| YML001W                                          | YPT7          | YNL051W                 | COG5          |
| YLR337C                                          | VRP1          | YGL153W                 | PEX14         |
| YNL297C                                          | MON2          | YML038C                 | YMD8          |

| Predictions at threshold level 0.80 continued... |               |                         |               |
|--------------------------------------------------|---------------|-------------------------|---------------|
| Gene1 of predicted pair                          |               | Gene2 of predicted pair |               |
| Systematic Name                                  | Standard Name | Systematic Name         | Standard Name |
| YKL116C                                          | PRR1          | YLR398C                 | SKI2          |
| YHR060W                                          | VMA22         | YCL001W                 | RER1          |
| YOR033C                                          | EXO1          | YDR207C                 | UME6          |
| YOL126C                                          | MDH2          | YER115C                 | SPR6          |
| YPL057C                                          | SUR1          | YGL163C                 | RAD54         |
| YKL025C                                          | PAN3          | YPL115C                 | BEM3          |
| YLR292C                                          | SEC72         | YDR318W                 | MCM21         |
| YPR089W                                          | YPR089W       | YMR022W                 | UBC7          |
| YNR072W                                          | HXT17         | YDR261C                 | EXG2          |
| YHR134W                                          | WSS1          | YLR233C                 | EST1          |
| YCL037C                                          | SRO9          | YIR005W                 | IST3          |
| YOR312C                                          | RPL20B        | YEL036C                 | ANP1          |
| YBR200W                                          | BEM1          | YDR261C                 | EXG2          |
| YMR224C                                          | MRE11         | YGL153W                 | PEX14         |
| YDL101C                                          | DUN1          | YML028W                 | TSA1          |
| YDR146C                                          | SWI5          | YHR108W                 | GGA2          |
| YPL024W                                          | RMI1          | YER144C                 | UBP5          |
| YLR095C                                          | IOC2          | YGR249W                 | MGA1          |
| YCR066W                                          | RAD18         | YER162C                 | RAD4          |
| YDL020C                                          | RPN4          | YJR135C                 | MCM22         |
| YDR320C                                          | SWA2          | YHR039C-A               | VMA10         |
| YKR001C                                          | VPS1          | YGL115W                 | SNF4          |
| YNL032W                                          | SIW14         | YMR133W                 | REC114        |
| YLR083C                                          | EMP70         | YOR127W                 | RGA1          |
| YJR059W                                          | PTK2          | YMR125W                 | STO1          |
| YLR093C                                          | NYV1          | YAL030W                 | SNC1          |
| YNL044W                                          | YIP3          | YNL293W                 | MSB3          |
| YDR293C                                          | SSD1          | YIL008W                 | URM1          |
| YER114C                                          | BOI2          | YHR012W                 | VPS29         |

| Predictions at threshold level 0.80 continued... |               |                         |               |
|--------------------------------------------------|---------------|-------------------------|---------------|
| Gene1 of predicted pair                          |               | Gene2 of predicted pair |               |
| Systematic Name                                  | Standard Name | Systematic Name         | Standard Name |
| YDR200C                                          | VPS64         | YDL047W                 | SIT4          |
| YBL103C                                          | RTG3          | YGL252C                 | RTG2          |
| YLR192C                                          | HCR1          | YMR311C                 | GLC8          |
| YKL025C                                          | PAN3          | YPL022W                 | RAD1          |
| YPR051W                                          | MAK3          | YCR086W                 | CSM1          |
| YJR032W                                          | CPR7          | YPR119W                 | CLB2          |
| YMR214W                                          | SCJ1          | YDR207C                 | UME6          |
| YBR173C                                          | UMP1          | YER139C                 | YER139C       |
| YFL013C                                          | IES1          | YDR289C                 | RTT103        |
| YGL066W                                          | SGF73         | YML095C                 | RAD10         |
| YPL024W                                          | RMI1          | YDL077C                 | VAM6          |
| YEL013W                                          | VAC8          | YHR167W                 | THP2          |
| YLR288C                                          | MEC3          | YNL215W                 | IES2          |
| YDR477W                                          | SNF1          | YNL087W                 | TCB2          |
| YCR066W                                          | RAD18         | YMR055C                 | BUB2          |
| YLR234W                                          | TOP3          | YPL161C                 | BEM4          |
| YDR254W                                          | CHL4          | YHR200W                 | RPN10         |
| YPL042C                                          | SSN3          | YPR072W                 | NOT5          |
| YGR019W                                          | UGA1          | YOR127W                 | RGA1          |
| YFL013C                                          | IES1          | YFR010W                 | UBP6          |
| YCL037C                                          | SRO9          | YAR014C                 | BUD14         |
| YGR270W                                          | YTA7          | YGR188C                 | BUB1          |
| YMR109W                                          | MYO5          | YPR046W                 | MCM16         |
| YGR184C                                          | UBR1          | YGL163C                 | RAD54         |
| YGL212W                                          | VAM7          | YNR032W                 | PPG1          |
| YMR198W                                          | CIK1          | YPL234C                 | TFP3          |
| YIL008W                                          | URM1          | YGR135W                 | PRE9          |
| YOR106W                                          | VAM3          | YFL033C                 | RIM15         |
| YDR335W                                          | MSN5          | YDR363W-A               | SEM1          |

| Predictions at threshold level 0.80 continued... |               |                         |               |
|--------------------------------------------------|---------------|-------------------------|---------------|
| Gene1 of predicted pair                          |               | Gene2 of predicted pair |               |
| Systematic Name                                  | Standard Name | Systematic Name         | Standard Name |
| YPR131C                                          | NAT3          | YLR370C                 | ARC18         |
| YGR105W                                          | VMA21         | YPR032W                 | SRO7          |
| YER144C                                          | UBP5          | YER162C                 | RAD4          |
| YPR131C                                          | NAT3          | YML103C                 | NUP188        |
| YBR111W-A                                        | SUS1          | YDR216W                 | ADR1          |
| YDR004W                                          | RAD57         | YBL079W                 | NUP170        |
| YMR116C                                          | ASC1          | YPL050C                 | MNN9          |
| YFR036W                                          | CDC26         | YMR311C                 | GLC8          |
| YNL201C                                          | PSY2          | YNL106C                 | INP52         |
| YGR261C                                          | APL6          | YOR327C                 | SNC2          |
| YPR084W                                          | YPR084W       | YJR060W                 | CBF1          |
| YOR001W                                          | RRP6          | YCL037C                 | SRO9          |
| YIL008W                                          | URM1          | YJR032W                 | CPR7          |
| YNL206C                                          | RTT106        | YDR440W                 | DOT1          |
| YJR106W                                          | ECM27         | YPR149W                 | NCE102        |
| YPR089W                                          | YPR089W       | YDR310C                 | SUM1          |
| YMR311C                                          | GLC8          | YLR425W                 | TUS1          |
| YBL102W                                          | SFT2          | YML071C                 | COG8          |
| YDR456W                                          | NHX1          | YLR371W                 | ROM2          |
| YML115C                                          | VAN1          | YLR447C                 | VMA6          |
| YMR142C                                          | RPL13B        | YPL161C                 | BEM4          |
| YPL001W                                          | HAT1          | YKL032C                 | IXR1          |
| YAL024C                                          | LTE1          | YML028W                 | TSA1          |
| YDR245W                                          | MNN10         | YLR182W                 | SWI6          |
| YBR200W                                          | BEM1          | YMR179W                 | SPT21         |
| YKL010C                                          | UFD4          | YDR378C                 | LSM6          |
| YLR381W                                          | CTF3          | YOL091W                 | SPO21         |
| YKR001C                                          | VPS1          | YGR105W                 | VMA21         |
| YCR020C-A                                        | MAK31         | YNL051W                 | COG5          |

| Predictions at threshold level 0.80 continued... |               |                         |               |
|--------------------------------------------------|---------------|-------------------------|---------------|
| Gene1 of predicted pair                          |               | Gene2 of predicted pair |               |
| Systematic Name                                  | Standard Name | Systematic Name         | Standard Name |
| YDR320C                                          | SWA2          | YEL051W                 | VMA8          |
| YOR332W                                          | VMA4          | YJR033C                 | RAV1          |
| YPL161C                                          | BEM4          | YBR280C                 | SAF1          |
| YBR107C                                          | IML3          | YJL183W                 | MNN11         |
| YOR195W                                          | SLK19         | YER116C                 | SLX8          |
| YJR090C                                          | GRR1          | YJL190C                 | RPS22A        |
| YER116C                                          | SLX8          | YKL068W                 | NUP100        |
| YKL010C                                          | UFD4          | YOL081W                 | IRA2          |
| YFR036W                                          | CDC26         | YPR119W                 | CLB2          |
| YHR134W                                          | WSS1          | YML028W                 | TSA1          |
| YNL069C                                          | RPL16B        | YPR032W                 | SRO7          |
| YBR200W                                          | BEM1          | YHR200W                 | RPN10         |
| YDR137W                                          | RGP1          | YOR043W                 | WHI2          |
| YOR327C                                          | SNC2          | YBL025W                 | RRN10         |
| YBR030W                                          | YBR030W       | YHR060W                 | VMA22         |
| YNL041C                                          | COG6          | YNL238W                 | KEX2          |
| YHL031C                                          | GOS1          | YPL234C                 | TFP3          |
| YBL008W                                          | HIR1          | YDR254W                 | CHL4          |
| YMR153W                                          | NUP53         | YML071C                 | COG8          |
| YNL248C                                          | RPA49         | YGR188C                 | BUB1          |
| YPL057C                                          | SUR1          | YOR308C                 | SNU66         |
| YHR156C                                          | LIN1          | YNL325C                 | FIG4          |
| YMR153W                                          | NUP53         | YKL048C                 | ELM1          |
| YCR077C                                          | PAT1          | YBL072C                 | RPS8A         |
| YPL045W                                          | VPS16         | YPL195W                 | APL5          |
| YJR060W                                          | CBF1          | YNL107W                 | YAF9          |
| YOR332W                                          | VMA4          | YGR105W                 | VMA21         |
| YJL006C                                          | CTK2          | YCR077C                 | PAT1          |
| YDL116W                                          | NUP84         | YGL031C                 | RPL24A        |

| Predictions at threshold level 0.80 continued... |               |                         |               |
|--------------------------------------------------|---------------|-------------------------|---------------|
| Gene1 of predicted pair                          |               | Gene2 of predicted pair |               |
| Systematic Name                                  | Standard Name | Systematic Name         | Standard Name |
| YER144C                                          | UBP5          | YLR371W                 | ROM2          |
| YGR081C                                          | SLX9          | YBL079W                 | NUP170        |
| YLR320W                                          | MMS22         | YDL192W                 | ARF1          |
| YIL036W                                          | CST6          | YLR410W                 | VIP1          |
| YKL032C                                          | IXR1          | YLR370C                 | ARC18         |
| YOR290C                                          | SNF2          | YHR013C                 | ARD1          |
| YOR290C                                          | SNF2          | YDL192W                 | ARF1          |
| YHL031C                                          | GOS1          | YDL002C                 | NHP10         |
| YFR036W                                          | CDC26         | YDL077C                 | VAM6          |
| YCL032W                                          | STE50         | YDR309C                 | GIC2          |
| YBR194W                                          | SOY1          | YDR245W                 | MNN10         |
| YLR018C                                          | POM34         | YGR081C                 | SLX9          |
| YHR073W                                          | OSH3          | YFL047W                 | RGD2          |
| YDL002C                                          | NHP10         | YNL107W                 | YAF9          |
| YOR023C                                          | AHC1          | YGL151W                 | NUT1          |
| YPL001W                                          | HAT1          | YOR368W                 | RAD17         |
| YHR012W                                          | VPS29         | YER162C                 | RAD4          |
| YKR072C                                          | SIS2          | YJL187C                 | SWE1          |
| YNL307C                                          | MCK1          | YOL090W                 | MSH2          |
| YLR083C                                          | EMP70         | YDR080W                 | VPS41         |
| YNL025C                                          | SSN8          | YLR350W                 | ORM2          |
| YPL137C                                          | GIP3          | YER122C                 | GLO3          |
| YLL007C                                          | YLL007C       | YBR114W                 | RAD16         |
| YPL129W                                          | TAF14         | YMR127C                 | SAS2          |
| YKL048C                                          | ELM1          | YDR289C                 | RTT103        |
| YCL035C                                          | GRX1          | YML007W                 | YAP1          |
| YMR224C                                          | MRE11         | YBL047C                 | EDE1          |
| YDL059C                                          | RAD59         | YNL307C                 | MCK1          |
| YDR080W                                          | VPS41         | YPL195W                 | APL5          |

| Predictions at threshold level 0.80 continued... |               |                         |               |
|--------------------------------------------------|---------------|-------------------------|---------------|
| Gene1 of predicted pair                          |               | Gene2 of predicted pair |               |
| Systematic Name                                  | Standard Name | Systematic Name         | Standard Name |
| YBL103C                                          | RTG3          | YNL238W                 | KEX2          |
| YNL087W                                          | TCB2          | YBR019C                 | GAL10         |
| YDR443C                                          | SSN2          | YPL195W                 | APL5          |
| YGR261C                                          | APL6          | YNL291C                 | MID1          |
| YNL051W                                          | COG5          | YDR207C                 | UME6          |
| YJL190C                                          | RPS22A        | YBR114W                 | RAD16         |
| YLR410W                                          | VIP1          | YDR207C                 | UME6          |
| YCR077C                                          | PAT1          | YEL056W                 | HAT2          |
| YOR043W                                          | WHI2          | YOL121C                 | RPS19A        |
| YEL056W                                          | HAT2          | YBR036C                 | CSG2          |
| YLR018C                                          | POM34         | YML057W                 | CMP2          |
| YOL126C                                          | MDH2          | YNL199C                 | GCR2          |
| YOL108C                                          | INO4          | YKR030W                 | GMH1          |
| YOR083W                                          | WHI5          | YLR370C                 | ARC18         |
| YGR104C                                          | SRB5          | YFR010W                 | UBP6          |
| YOR212W                                          | STE4          | YDR309C                 | GIC2          |
| YPL001W                                          | HAT1          | YBR009C                 | HHF1          |
| YMR198W                                          | CIK1          | YKL041W                 | VPS24         |
| YJL154C                                          | VPS35         | YDR320C                 | SWA2          |
| YOR014W                                          | RTS1          | YPR119W                 | CLB2          |
| YJR032W                                          | CPR7          | YDR310C                 | SUM1          |
| YNL068C                                          | FKH2          | YNL206C                 | RTT106        |
| YEL053C                                          | MAK10         | YAL002W                 | VPS8          |
| YKL073W                                          | LHS1          | YMR214W                 | SCJ1          |
| YGL054C                                          | ERV14         | YDL077C                 | VAM6          |
| YGL003C                                          | CDH1          | YKL114C                 | APN1          |
| YGL163C                                          | RAD54         | YPL256C                 | CLN2          |
| YLR371W                                          | ROM2          | YMR230W                 | RPS10B        |
| YPL042C                                          | SSN3          | YLR386W                 | VAC14         |



| Predictions at threshold level 0.80 continued... |               |                         |               |
|--------------------------------------------------|---------------|-------------------------|---------------|
| Gene1 of predicted pair                          |               | Gene2 of predicted pair |               |
| Systematic Name                                  | Standard Name | Systematic Name         | Standard Name |
| YLR102C                                          | APC9          | YHR200W                 | RPN10         |
| YJR140C                                          | HIR3          | YML016C                 | PPZ1          |
| YER001W                                          | MNN1          | YJL183W                 | MNN11         |
| YMR127C                                          | SAS2          | YOR023C                 | AHC1          |
| YPR036W                                          | VMA13         | YER044C                 | ERG28         |
| YOR132W                                          | VPS17         | YPL161C                 | BEM4          |
| YOR023C                                          | AHC1          | YMR055C                 | BUB2          |
| YLR386W                                          | VAC14         | YAL010C                 | MDM10         |
| YDR137W                                          | RGP1          | YER040W                 | GLN3          |
| YDR293C                                          | SSD1          | YGR261C                 | APL6          |
| YMR109W                                          | MYO5          | YHR012W                 | VPS29         |
| YJR040W                                          | GEF1          | YKR020W                 | VPS51         |
| YGL054C                                          | ERV14         | YOR327C                 | SNC2          |
| YDR443C                                          | SSN2          | YDR456W                 | NHX1          |
| YML115C                                          | VAN1          | YLR425W                 | TUS1          |
| YDL116W                                          | NUP84         | YLR182W                 | SWI6          |
| YLR083C                                          | EMP70         | YOR112W                 | CEX1          |
| YDL161W                                          | ENT1          | YDR323C                 | PEP7          |
| YPR028W                                          | YOP1          | YNR049C                 | MSO1          |
| YLR090W                                          | XDJ1          | YEL053C                 | MAK10         |
| YDR183W                                          | PLP1          | YDR310C                 | SUM1          |
| YFR031C-A                                        | RPL2A         | YOR270C                 | VPH1          |
| YOR106W                                          | VAM3          | YEL053C                 | MAK10         |
| YDR320C                                          | SWA2          | YNL107W                 | YAF9          |
| YOR337W                                          | TEA1          | YNL041C                 | COG6          |
| YHR073W                                          | OSH3          | YKL068W                 | NUP100        |
| YLR240W                                          | VPS34         | YPL120W                 | VPS30         |
| YGL200C                                          | EMP24         | YNL049C                 | SFB2          |
| YML115C                                          | VAN1          | YEL036C                 | ANP1          |

| Predictions at threshold level 0.80 continued... |               |                         |               |
|--------------------------------------------------|---------------|-------------------------|---------------|
| Gene1 of predicted pair                          |               | Gene2 of predicted pair |               |
| Systematic Name                                  | Standard Name | Systematic Name         | Standard Name |
| YBR228W                                          | SLX1          | YGL031C                 | RPL24A        |
| YLR083C                                          | EMP70         | YML001W                 | YPT7          |
| YDL149W                                          | ATG9          | YML059C                 | NTE1          |
| YMR311C                                          | GLC8          | YER040W                 | GLN3          |
| YJL172W                                          | CPS1          | YDR358W                 | GGA1          |
| YOR080W                                          | DIA2          | YOR308C                 | SNU66         |
| YMR319C                                          | FET4          | YOR071C                 | THI71         |
| YPL253C                                          | VIK1          | YJL006C                 | CTK2          |
| YHR134W                                          | WSS1          | YMR109W                 | MYO5          |
| YLR320W                                          | MMS22         | YOR327C                 | SNC2          |
| YBL021C                                          | HAP3          | YLR233C                 | EST1          |
| YLR456W                                          | YLR456W       | YIR009W                 | MSL1          |
| YDL042C                                          | SIR2          | YBR009C                 | HHF1          |
| YBR173C                                          | UMP1          | YPL057C                 | SUR1          |
| YMR054W                                          | STV1          | YML071C                 | COG8          |
| YLR386W                                          | VAC14         | YML095C                 | RAD10         |
| YIR005W                                          | IST3          | YGL252C                 | RTG2          |
| YIR009W                                          | MSL1          | YPR101W                 | SNT309        |
| YHR056C                                          | RSC30         | YHR191C                 | CTF8          |
| YML095C                                          | RAD10         | YJR060W                 | CBF1          |
| YBR278W                                          | DPB3          | YOR304W                 | ISW2          |
| YLR079W                                          | SIC1          | YPL022W                 | RAD1          |
| YJL004C                                          | SYS1          | YKR030W                 | GMH1          |
| YGL237C                                          | HAP2          | YAL002W                 | VPS8          |
| YBR200W                                          | BEM1          | YJL136C                 | RPS21B        |
| YBL102W                                          | SFT2          | YDR202C                 | RAV2          |
| YLR288C                                          | MEC3          | YMR199W                 | CLN1          |
| YDR260C                                          | SWM1          | YDR254W                 | CHL4          |
| YOR191W                                          | RIS1          | YBR228W                 | SLX1          |

| Predictions at threshold level 0.80 continued... |               |                         |               |
|--------------------------------------------------|---------------|-------------------------|---------------|
| Gene1 of predicted pair                          |               | Gene2 of predicted pair |               |
| Systematic Name                                  | Standard Name | Systematic Name         | Standard Name |
| YBR217W                                          | ATG12         | YNL087W                 | TCB2          |
| YDR507C                                          | GIN4          | YDR363W-A               | SEM1          |
| YGL212W                                          | VAM7          | YMR230W                 | RPS10B        |
| YDR293C                                          | SSD1          | YHR060W                 | VMA22         |
| YPL024W                                          | RMI1          | YPL253C                 | VIK1          |
| YGL237C                                          | HAP2          | YJR032W                 | CPR7          |
| YGR241C                                          | YAP1802       | YPL045W                 | VPS16         |
| YPR084W                                          | YPR084W       | YMR038C                 | CCS1          |
| YGL147C                                          | RPL9A         | YDL223C                 | HBT1          |
| YGL212W                                          | VAM7          | YGR020C                 | VMA7          |
| YJL004C                                          | SYS1          | YDR310C                 | SUM1          |
| YNL248C                                          | RPA49         | YLR254C                 | NDL1          |
| YDL020C                                          | RPN4          | YPR046W                 | MCM16         |
| YFR010W                                          | UBP6          | YHL031C                 | GOS1          |
| YKR020W                                          | VPS51         | YNL079C                 | TPM1          |
| YIL159W                                          | BNR1          | YKR048C                 | NAP1          |
| YBL047C                                          | EDE1          | YBL072C                 | RPS8A         |
| YBR280C                                          | SAF1          | YDR310C                 | SUM1          |
| YHL002W                                          | HSE1          | YLR425W                 | TUS1          |
| YGR249W                                          | MGA1          | YER162C                 | RAD4          |
| YLR381W                                          | CTF3          | YGL237C                 | HAP2          |
| YDR097C                                          | MSH6          | YNL076W                 | MKS1          |
| YFR031C-A                                        | RPL2A         | YDL083C                 | RPS16B        |
| YGL252C                                          | RTG2          | YOL081W                 | IRA2          |
| YPL057C                                          | SUR1          | YHR039C-A               | VMA10         |
| YNL069C                                          | RPL16B        | YGL223C                 | COG1          |
| YNL215W                                          | IES2          | YDL006W                 | PTC1          |
| YOR132W                                          | VPS17         | YGL253W                 | HXK2          |
| YMR004W                                          | MVP1          | YEL043W                 | YEL043W       |

| Predictions at threshold level 0.80 continued... |               |                         |               |
|--------------------------------------------------|---------------|-------------------------|---------------|
| Gene1 of predicted pair                          |               | Gene2 of predicted pair |               |
| Systematic Name                                  | Standard Name | Systematic Name         | Standard Name |
| YOL145C                                          | CTR9          | YPL057C                 | SUR1          |
| YKL048C                                          | ELM1          | YHR039C-A               | VMA10         |
| YBR173C                                          | UMP1          | YHR039C-A               | VMA10         |
| YLR216C                                          | CPR6          | YDR293C                 | SSD1          |
| YJR106W                                          | ECM27         | YDR105C                 | TMS1          |
| YHR086W                                          | NAM8          | YDR378C                 | LSM6          |
| YKR072C                                          | SIS2          | YNL016W                 | PUB1          |
| YDL020C                                          | RPN4          | YDR207C                 | UME6          |
| YLR090W                                          | XDJ1          | YLR386W                 | VAC14         |
| YIL076W                                          | SEC28         | YOR270C                 | VPH1          |
| YGL078C                                          | DBP3          | YLR398C                 | SKI2          |
| YMR133W                                          | REC114        | YJL183W                 | MNN11         |
| YHR200W                                          | RPN10         | YLR452C                 | SST2          |
| YNL243W                                          | SLA2          | YJL187C                 | SWE1          |
| YPL106C                                          | SSE1          | YJR032W                 | CPR7          |
| YDR477W                                          | SNF1          | YLR094C                 | GIS3          |
| YOR076C                                          | SKI7          | YPL057C                 | SUR1          |
| YPL253C                                          | VIK1          | YDL013W                 | SLX5          |
| YDR443C                                          | SSN2          | YKL139W                 | CTK1          |
| YNL032W                                          | SIW14         | YNL307C                 | MCK1          |
| YGL163C                                          | RAD54         | YPR046W                 | MCM16         |
| YMR142C                                          | RPL13B        | YER044C                 | ERG28         |
| YDR076W                                          | RAD55         | YLR032W                 | RAD5          |
| YMR091C                                          | NPL6          | YLL026W                 | HSP104        |
| YPR036W                                          | VMA13         | YPR119W                 | CLB2          |
| YPR030W                                          | CSR2          | YMR230W                 | RPS10B        |
| YJR063W                                          | RPA12         | YLR410W                 | VIP1          |
| YNL307C                                          | MCK1          | YDR260C                 | SWM1          |
| YFL023W                                          | BUD27         | YPR046W                 | MCM16         |

| Predictions at threshold level 0.80 continued... |               |                         |               |
|--------------------------------------------------|---------------|-------------------------|---------------|
| Gene1 of predicted pair                          |               | Gene2 of predicted pair |               |
| Systematic Name                                  | Standard Name | Systematic Name         | Standard Name |
| YGL060W                                          | YBP2          | YKL114C                 | APN1          |
| YNL206C                                          | RTT106        | YNL147W                 | LSM7          |
| YLR288C                                          | MEC3          | YDR146C                 | SWI5          |
| YJL172W                                          | CPS1          | YMR311C                 | GLC8          |
| YMR026C                                          | PEX12         | YPR046W                 | MCM16         |
| YER110C                                          | KAP123        | YKL048C                 | ELM1          |
| YLR216C                                          | CPR6          | YER114C                 | BOI2          |
| YDR293C                                          | SSD1          | YDR202C                 | RAV2          |
| YDL116W                                          | NUP84         | YMR284W                 | YKU70         |
| YLR093C                                          | NYV1          | YJL183W                 | MNN11         |
| YGL212W                                          | VAM7          | YJR084W                 | CSN12         |
| YDR507C                                          | GIN4          | YPR040W                 | TIP41         |
| YDR254W                                          | CHL4          | YPL018W                 | CTF19         |
| YDR484W                                          | VPS52         | YCR053W                 | THR4          |
| YLL039C                                          | UBI4          | YOL044W                 | PEX15         |
| YLR191W                                          | PEX13         | YPR173C                 | VPS4          |
| YJL124C                                          | LSM1          | YIR005W                 | IST3          |
| YMR224C                                          | MRE11         | YLR093C                 | NYV1          |
| YDR176W                                          | NGG1          | YPR101W                 | SNT309        |
| YNL106C                                          | INP52         | YCL014W                 | BUD3          |
| YDL184C                                          | RPL41A        | YLR371W                 | ROM2          |
| YEL009C                                          | GCN4          | YDR146C                 | SWI5          |
| YMR055C                                          | BUB2          | YKL110C                 | KTI12         |
| YDR192C                                          | NUP42         | YKR095W                 | MLP1          |
| YBL101C                                          | ECM21         | YLR370C                 | ARC18         |
| YDL020C                                          | RPN4          | YLR292C                 | SEC72         |
| YJL124C                                          | LSM1          | YPL220W                 | RPL1A         |
| YDL052C                                          | SLC1          | YBR041W                 | FAT1          |
| YLR396C                                          | VPS33         | YGL198W                 | YIP4          |

| Predictions at threshold level 0.80 continued... |               |                         |               |
|--------------------------------------------------|---------------|-------------------------|---------------|
| Gene1 of predicted pair                          |               | Gene2 of predicted pair |               |
| Systematic Name                                  | Standard Name | Systematic Name         | Standard Name |
| YMR153W                                          | NUP53         | YHR060W                 | VMA22         |
| YNL307C                                          | MCK1          | YLR254C                 | NDL1          |
| YBR274W                                          | CHK1          | YJL138C                 | TIF2          |
| YHR119W                                          | SET1          | YLR015W                 | BRE2          |
| YFR036W                                          | CDC26         | YML028W                 | TSA1          |
| YDR146C                                          | SWI5          | YOR140W                 | SFL1          |
| YPL024W                                          | RMI1          | YLR180W                 | SAM1          |
| YOR033C                                          | EXO1          | YMR231W                 | PEP5          |
| YBL008W                                          | HIR1          | YBR278W                 | DPB3          |
| YLR410W                                          | VIP1          | YGL252C                 | RTG2          |
| YDL184C                                          | RPL41A        | YPL220W                 | RPL1A         |
| YGL060W                                          | YBP2          | YMR198W                 | CIK1          |
| YER129W                                          | SAK1          | YDR028C                 | REG1          |
| YLR386W                                          | VAC14         | YGL237C                 | HAP2          |
| YDR443C                                          | SSN2          | YMR311C                 | GLC8          |
| YPR046W                                          | MCM16         | YDR183W                 | PLP1          |
| YKL048C                                          | ELM1          | YJR135C                 | MCM22         |
| YHR079C                                          | IRE1          | YCR053W                 | THR4          |
| YPL022W                                          | RAD1          | YPR119W                 | CLB2          |
| YJL058C                                          | BIT61         | YJR035W                 | RAD26         |
| YKL139W                                          | CTK1          | YKR035W-A               | DID2          |
| YMR199W                                          | CLN1          | YMR231W                 | PEP5          |
| YBR108W                                          | YBR108W       | YGR188C                 | BUB1          |
| YDR108W                                          | GSG1          | YGR071C                 | YGR071C       |
| YNL201C                                          | PSY2          | YHR111W                 | UBA4          |
| YIL076W                                          | SEC28         | YOR106W                 | VAM3          |
| YHR073W                                          | OSH3          | YIL148W                 | RPL40A        |
| YDR395W                                          | SXM1          | YML103C                 | NUP188        |
| YHL031C                                          | GOS1          | YEL013W                 | VAC8          |

| Predictions at threshold level 0.80 continued... |               |                         |               |
|--------------------------------------------------|---------------|-------------------------|---------------|
| Gene1 of predicted pair                          |               | Gene2 of predicted pair |               |
| Systematic Name                                  | Standard Name | Systematic Name         | Standard Name |
| YGR108W                                          | CLB1          | YML016C                 | PPZ1          |
| YGR014W                                          | MSB2          | YLR398C                 | SKI2          |
| YOR304W                                          | ISW2          | YMR042W                 | ARG80         |
| YMR216C                                          | SKY1          | YCL037C                 | SRO9          |
| YLR234W                                          | TOP3          | YJR035W                 | RAD26         |
| YCR084C                                          | TUP1          | YBR009C                 | HHF1          |
| YIL076W                                          | SEC28         | YOR109W                 | INP53         |
| YLR360W                                          | VPS38         | YPL234C                 | TFP3          |
| YLR441C                                          | RPS1A         | YML071C                 | COG8          |
| YLR079W                                          | SIC1          | YIL148W                 | RPL40A        |
| YPL253C                                          | VIK1          | YHR114W                 | BZZ1          |
| YKL139W                                          | CTK1          | YLR381W                 | CTF3          |
| YER110C                                          | KAP123        | YMR125W                 | STO1          |
| YDR223W                                          | CRF1          | YJL141C                 | YAK1          |
| YBL047C                                          | EDE1          | YJL183W                 | MNN11         |
| YOR358W                                          | HAP5          | YPR046W                 | MCM16         |
| YBL051C                                          | PIN4          | YDR309C                 | GIC2          |
| YJR032W                                          | CPR7          | YPR030W                 | CSR2          |
| YAL024C                                          | LTE1          | YJR140C                 | HIR3          |
| YDR261C                                          | EXG2          | YCR053W                 | THR4          |
| YDR245W                                          | MNN10         | YER139C                 | YER139C       |
| YGR252W                                          | GCN5          | YNL079C                 | TPM1          |
| YKL025C                                          | PAN3          | YGR019W                 | UGA1          |
| YPL137C                                          | GIP3          | YJL183W                 | MNN11         |
| YKL048C                                          | ELM1          | YPR120C                 | CLB5          |
| YNL201C                                          | PSY2          | YML016C                 | PPZ1          |
| YJL124C                                          | LSM1          | YER122C                 | GLO3          |
| YKL116C                                          | PRR1          | YER144C                 | UBP5          |
| YJL172W                                          | CPS1          | YMR214W                 | SCJ1          |

| Predictions at threshold level 0.80 continued... |               |                         |               |
|--------------------------------------------------|---------------|-------------------------|---------------|
| Gene1 of predicted pair                          |               | Gene2 of predicted pair |               |
| Systematic Name                                  | Standard Name | Systematic Name         | Standard Name |
| YLR360W                                          | VPS38         | YJR032W                 | CPR7          |
| YPL042C                                          | SSN3          | YPL161C                 | BEM4          |
| YHR039C-A                                        | VMA10         | YER120W                 | SCS2          |
| YPL024W                                          | RMI1          | YBR019C                 | GAL10         |
| YLR441C                                          | RPS1A         | YER122C                 | GLO3          |
| YER110C                                          | KAP123        | YNL031C                 | HHT2          |
| YOR112W                                          | CEX1          | YNL107W                 | YAF9          |
| YBR195C                                          | MSI1          | YDR076W                 | RAD55         |
| YIL159W                                          | BNR1          | YLR094C                 | GIS3          |
| YBR030W                                          | YBR030W       | YBR200W                 | BEM1          |
| YKR082W                                          | NUP133        | YER105C                 | NUP157        |
| YOR033C                                          | EXO1          | YDL013W                 | SLX5          |
| YJR040W                                          | GEF1          | YOR327C                 | SNC2          |
| YLR292C                                          | SEC72         | YOR132W                 | VPS17         |
| YIL053W                                          | RHR2          | YBL103C                 | RTG3          |
| YLR360W                                          | VPS38         | YDR456W                 | NHX1          |
| YFR010W                                          | UBP6          | YPL079W                 | RPL21B        |
| YLL007C                                          | YLL007C       | YLR381W                 | CTF3          |
| YDR477W                                          | SNF1          | YDR422C                 | SIP1          |
| YGL115W                                          | SNF4          | YBL025W                 | RRN10         |
| YLR079W                                          | SIC1          | YJL006C                 | CTK2          |
| YMR167W                                          | MLH1          | YKL101W                 | HSL1          |
| YIL159W                                          | BNR1          | YFR010W                 | UBP6          |
| YBR030W                                          | YBR030W       | YPR030W                 | CSR2          |
| YLR150W                                          | STM1          | YNL307C                 | MCK1          |
| YHR156C                                          | LIN1          | YBL025W                 | RRN10         |
| YDL223C                                          | HBT1          | YNL238W                 | KEX2          |
| YCL063W                                          | VAC17         | YFR021W                 | ATG18         |
| YBR200W                                          | BEM1          | YOR035C                 | SHE4          |



| Predictions at threshold level 0.80 continued... |               |                         |               |
|--------------------------------------------------|---------------|-------------------------|---------------|
| Gene1 of predicted pair                          |               | Gene2 of predicted pair |               |
| Systematic Name                                  | Standard Name | Systematic Name         | Standard Name |
| YOR106W                                          | VAM3          | YPR032W                 | SRO7          |
| YNL093W                                          | YPT53         | YNL044W                 | YIP3          |
| YNL041C                                          | COG6          | YBL025W                 | RRN10         |
| YMR311C                                          | GLC8          | YBR036C                 | CSG2          |
| YPL256C                                          | CLN2          | YER027C                 | GAL83         |
| YLR360W                                          | VPS38         | YOR140W                 | SFL1          |
| YLR079W                                          | SIC1          | YOR312C                 | RPL20B        |
| YER144C                                          | UBP5          | YLR093C                 | NYV1          |
| YDL155W                                          | CLB3          | YDR183W                 | PLP1          |
| YMR172W                                          | HOT1          | YDR318W                 | MCM21         |
| YDL002C                                          | NHP10         | YNL199C                 | GCR2          |
| YDR385W                                          | EFT2          | YGL200C                 | EMP24         |
| YOL018C                                          | TLG2          | YNL051W                 | COG5          |
| YGL033W                                          | HOP2          | YKL139W                 | CTK1          |
| YLR043C                                          | TRX1          | YGL212W                 | VAM7          |
| YML115C                                          | VAN1          | YBL101C                 | ECM21         |
| YMR142C                                          | RPL13B        | YDR310C                 | SUM1          |
| YGL115W                                          | SNF4          | YGR105W                 | VMA21         |
| YCL001W                                          | RER1          | YPL161C                 | BEM4          |
| YBR200W                                          | BEM1          | YJL124C                 | LSM1          |
| YIL053W                                          | RHR2          | YPR030W                 | CSR2          |
| YNL225C                                          | CNM67         | YHR115C                 | DMA1          |
| YPL256C                                          | CLN2          | YPR119W                 | CLB2          |
| YLR150W                                          | STM1          | YGL246C                 | RAI1          |
| YOL067C                                          | RTG1          | YHL002W                 | HSE1          |
| YNL218W                                          | MGS1          | YHR167W                 | THP2          |
| YJL154C                                          | VPS35         | YJL053W                 | PEP8          |
| YHR156C                                          | LIN1          | YKL048C                 | ELM1          |
| YPL057C                                          | SUR1          | YJL183W                 | MNN11         |

| Predictions at threshold level 0.80 continued... |               |                         |               |
|--------------------------------------------------|---------------|-------------------------|---------------|
| Gene1 of predicted pair                          |               | Gene2 of predicted pair |               |
| Systematic Name                                  | Standard Name | Systematic Name         | Standard Name |
| YDR080W                                          | VPS41         | YGL223C                 | COG1          |
| YPR036W                                          | VMA13         | YGL003C                 | CDH1          |
| YNL041C                                          | COG6          | YBR036C                 | CSG2          |
| YPL079W                                          | RPL21B        | YHR077C                 | NMD2          |
| YPL024W                                          | RMI1          | YBL058W                 | SHP1          |
| YMR224C                                          | MRE11         | YDL013W                 | SLX5          |
| YNL068C                                          | FKH2          | YGL066W                 | SGF73         |
| YJL183W                                          | MNN11         | YOR327C                 | SNC2          |
| YKL160W                                          | ELF1          | YER139C                 | YER139C       |
| YLR150W                                          | STM1          | YGL163C                 | RAD54         |
| YBL058W                                          | SHP1          | YOR290C                 | SNF2          |
| YMR153W                                          | NUP53         | YJR032W                 | CPR7          |
| YER047C                                          | SAP1          | YPR119W                 | CLB2          |
| YJR024C                                          | MDE1          | YMR125W                 | STO1          |
| YFR040W                                          | SAP155        | YPL256C                 | CLN2          |
| YNL068C                                          | FKH2          | YMR199W                 | CLN1          |
| YDR108W                                          | GSG1          | YGL115W                 | SNF4          |
| YDR245W                                          | MNN10         | YGL153W                 | PEX14         |
| YMR224C                                          | MRE11         | YJL183W                 | MNN11         |
| YPL022W                                          | RAD1          | YLR032W                 | RAD5          |
| YPR051W                                          | MAK3          | YGL223C                 | COG1          |
| YLR360W                                          | VPS38         | YJL004C                 | SYS1          |
| YOR109W                                          | INP53         | YEL053C                 | MAK10         |
| YNL069C                                          | RPL16B        | YMR055C                 | BUB2          |
| YKR001C                                          | VPS1          | YPL195W                 | APL5          |
| YMR198W                                          | CIK1          | YDL047W                 | SIT4          |
| YKR061W                                          | KTR2          | YHR013C                 | ARD1          |
| YNL215W                                          | IES2          | YOR038C                 | HIR2          |
| YPL161C                                          | BEM4          | YNL229C                 | URE2          |

| Predictions at threshold level 0.80 continued... |               |                         |               |
|--------------------------------------------------|---------------|-------------------------|---------------|
| Gene1 of predicted pair                          |               | Gene2 of predicted pair |               |
| Systematic Name                                  | Standard Name | Systematic Name         | Standard Name |
| YOR140W                                          | SFL1          | YER096W                 | SHC1          |
| YOR109W                                          | INP53         | YDL006W                 | PTC1          |
| YJR059W                                          | PTK2          | YER115C                 | SPR6          |
| YML016C                                          | PPZ1          | YIL008W                 | URM1          |
| YJR140C                                          | HIR3          | YEL013W                 | VAC8          |
| YPL037C                                          | EGD1          | YMR054W                 | STV1          |
| YNL054W                                          | VAC7          | YJR135C                 | MCM22         |
| YOL148C                                          | SPT20         | YBR089C-A               | NHP6B         |
| YBR173C                                          | UMP1          | YMR311C                 | GLC8          |
| YMR004W                                          | MVP1          | YJR032W                 | CPR7          |
| YKL129C                                          | MYO3          | YLR370C                 | ARC18         |
| YBL103C                                          | RTG3          | YLR452C                 | SST2          |
| YOR132W                                          | VPS17         | YGR054W                 | YGR054W       |
| YPL234C                                          | TFP3          | YJR033C                 | RAV1          |
| YGR072W                                          | UPF3          | YOR069W                 | VPS5          |
| YOR127W                                          | RGA1          | YOR109W                 | INP53         |
| YMR153W                                          | NUP53         | YLR441C                 | RPS1A         |
| YGR135W                                          | PRE9          | YGR188C                 | BUB1          |
| YLR083C                                          | EMP70         | YEL043W                 | YEL043W       |
| YGR072W                                          | UPF3          | YJR060W                 | CBF1          |
| YDR378C                                          | LSM6          | YDR363W-A               | SEM1          |
| YPR018W                                          | RLF2          | YMR199W                 | CLN1          |
| YPR072W                                          | NOT5          | YJL164C                 | TPK1          |
| YNR052C                                          | POP2          | YGR270W                 | YTA7          |
| YNL054W                                          | VAC7          | YNL307C                 | MCK1          |
| YGR239C                                          | PEX21         | YIL160C                 | POT1          |
| YLR441C                                          | RPS1A         | YML001W                 | YPT7          |
| YLR370C                                          | ARC18         | YKL041W                 | VPS24         |
| YHR200W                                          | RPN10         | YDL077C                 | VAM6          |

| Predictions at threshold level 0.80 continued... |               |                         |               |
|--------------------------------------------------|---------------|-------------------------|---------------|
| Gene1 of predicted pair                          |               | Gene2 of predicted pair |               |
| Systematic Name                                  | Standard Name | Systematic Name         | Standard Name |
| YGR054W                                          | YGR054W       | YBR114W                 | RAD16         |
| YDR443C                                          | SSN2          | YDR484W                 | VPS52         |
| YLR192C                                          | HCR1          | YER044C                 | ERG28         |
| YLR360W                                          | VPS38         | YGL054C                 | ERV14         |
| YOR275C                                          | RIM20         | YGL163C                 | RAD54         |
| YOR337W                                          | TEA1          | YKR099W                 | BAS1          |
| YLR061W                                          | RPL22A        | YBR082C                 | UBC4          |
| YKL006W                                          | RPL14A        | YKL032C                 | IXR1          |
| YPL240C                                          | HSP82         | YJR086W                 | STE18         |
| YJL183W                                          | MNN11         | YLR425W                 | TUS1          |
| YBR084C-A                                        | RPL19A        | YDR379W                 | RGA2          |
| YKL126W                                          | YPK1          | YNL076W                 | MKS1          |
| YPR046W                                          | MCM16         | YCR053W                 | THR4          |
| YML058W                                          | SML1          | YLR079W                 | SIC1          |
| YPL253C                                          | VIK1          | YDR289C                 | RTT103        |
| YMR142C                                          | RPL13B        | YFL023W                 | BUD27         |
| YDR146C                                          | SWI5          | YBR200W                 | BEM1          |
| YDR289C                                          | RTT103        | YMR038C                 | CCS1          |
| YLR292C                                          | SEC72         | YHL002W                 | HSE1          |
| YHR041C                                          | SRB2          | YBR089C-A               | NHP6B         |
| YMR016C                                          | SOK2          | YHR060W                 | VMA22         |
| YNR052C                                          | POP2          | YHR115C                 | DMA1          |
| YIL053W                                          | RHR2          | YDR477W                 | SNF1          |
| YOR080W                                          | DIA2          | YGL175C                 | SAE2          |
| YHR167W                                          | THP2          | YOR124C                 | UBP2          |
| YIL053W                                          | RHR2          | YDR484W                 | VPS52         |
| YOR043W                                          | WHI2          | YMR214W                 | SCJ1          |
| YNL087W                                          | TCB2          | YDR261C                 | EXG2          |
| YBL058W                                          | SHP1          | YGL003C                 | CDH1          |

| Predictions at threshold level 0.80 continued... |               |                         |               |
|--------------------------------------------------|---------------|-------------------------|---------------|
| Gene1 of predicted pair                          |               | Gene2 of predicted pair |               |
| Systematic Name                                  | Standard Name | Systematic Name         | Standard Name |
| YBL047C                                          | EDE1          | YLR370C                 | ARC18         |
| YBR127C                                          | VMA2          | YPL234C                 | TFP3          |
| YBL101C                                          | ECM21         | YKL041W                 | VPS24         |
| YHR200W                                          | RPN10         | YNL107W                 | YAF9          |
| YHR134W                                          | WSS1          | YJL183W                 | MNN11         |
| YBR171W                                          | SEC66         | YER162C                 | RAD4          |
| YOR106W                                          | VAM3          | YLR396C                 | VPS33         |
| YDR076W                                          | RAD55         | YHR010W                 | RPL27A        |
| YHR012W                                          | VPS29         | YKL119C                 | VPH2          |
| YDR260C                                          | SWM1          | YGL003C                 | CDH1          |
| YLR079W                                          | SIC1          | YDR171W                 | HSP42         |
| YER044C                                          | ERG28         | YCR053W                 | THR4          |
| YDL160C                                          | DHH1          | YDR448W                 | ADA2          |
| YOR001W                                          | RRP6          | YPR120C                 | CLB5          |
| YFR031C-A                                        | RPL2A         | YGL124C                 | MON1          |
| YIL159W                                          | BNR1          | YPR040W                 | TIP41         |
| YHR111W                                          | UBA4          | YIR005W                 | IST3          |
| YLR418C                                          | CDC73         | YHR056C                 | RSC30         |
| YER110C                                          | KAP123        | YDR183W                 | PLP1          |
| YDR225W                                          | HTA1          | YBR010W                 | HHT1          |
| YAL024C                                          | LTE1          | YGL252C                 | RTG2          |
| YBL008W                                          | HIR1          | YPL253C                 | VIK1          |
| YLR381W                                          | CTF3          | YDR144C                 | MKC7          |
| YGL133W                                          | ITC1          | YNL229C                 | URE2          |
| YNL243W                                          | SLA2          | YNL271C                 | BNI1          |
| YPL105C                                          | YPL105C       | YDR207C                 | UME6          |
| YJL053W                                          | PEP8          | YGL095C                 | VPS45         |
| YDL160C                                          | DHH1          | YNL147W                 | LSM7          |
| YDR080W                                          | VPS41         | YPL234C                 | TFP3          |

| Predictions at threshold level 0.80 continued... |               |                         |               |
|--------------------------------------------------|---------------|-------------------------|---------------|
| Gene1 of predicted pair                          |               | Gene2 of predicted pair |               |
| Systematic Name                                  | Standard Name | Systematic Name         | Standard Name |
| YPL129W                                          | TAF14         | YBR112C                 | CYC8          |
| YLR370C                                          | ARC18         | YER040W                 | GLN3          |
| YLR093C                                          | NYV1          | YJL095W                 | BCK1          |
| YHL031C                                          | GOS1          | YDL077C                 | VAM6          |
| YDR225W                                          | HTA1          | YBR289W                 | SNF5          |
| YPL120W                                          | VPS30         | YPR032W                 | SRO7          |
| YJR063W                                          | RPA12         | YFR036W                 | CDC26         |
| YNL098C                                          | RAS2          | YIL033C                 | BCY1          |
| YNL087W                                          | TCB2          | YNL041C                 | COG6          |
| YIL076W                                          | SEC28         | YNL107W                 | YAF9          |
| YER144C                                          | UBP5          | YML001W                 | YPT7          |
| YBR108W                                          | YBR108W       | YHR114W                 | BZZ1          |
| YDR146C                                          | SWI5          | YOR106W                 | VAM3          |
| YML115C                                          | VAN1          | YMR038C                 | CCS1          |
| YHR111W                                          | UBA4          | YIL008W                 | URM1          |
| YLL039C                                          | UBI4          | YLR425W                 | TUS1          |
| YLR094C                                          | GIS3          | YJR084W                 | CSN12         |
| YML058W                                          | SML1          | YIL066C                 | RNR3          |
| YPR036W                                          | VMA13         | YJL095W                 | BCK1          |
| YHR167W                                          | THP2          | YAL002W                 | VPS8          |
| YPL018W                                          | CTF19         | YMR038C                 | CCS1          |
| YHL002W                                          | HSE1          | YAR014C                 | BUD14         |
| YBR030W                                          | YBR030W       | YOR290C                 | SNF2          |
| YOR001W                                          | RRP6          | YER041W                 | YEN1          |
| YNL288W                                          | CAF40         | YHR134W                 | WSS1          |
| YGR072W                                          | UPF3          | YDR202C                 | RAV2          |
| YDR477W                                          | SNF1          | YNL032W                 | SIW14         |
| YNR052C                                          | POP2          | YBL079W                 | NUP170        |
| YDR378C                                          | LSM6          | YGL200C                 | EMP24         |

| Predictions at threshold level 0.80 continued... |               |                         |               |
|--------------------------------------------------|---------------|-------------------------|---------------|
| Gene1 of predicted pair                          |               | Gene2 of predicted pair |               |
| Systematic Name                                  | Standard Name | Systematic Name         | Standard Name |
| YMR055C                                          | BUB2          | YGR270W                 | YTA7          |
| YDR443C                                          | SSN2          | YPL037C                 | EGD1          |
| YKR072C                                          | SIS2          | YDR293C                 | SSD1          |
| YGR135W                                          | PRE9          | YKL041W                 | VPS24         |
| YER116C                                          | SLX8          | YKR095W                 | MLP1          |
| YJL154C                                          | VPS35         | YER120W                 | SCS2          |
| YBR171W                                          | SEC66         | YLR233C                 | EST1          |
| YEL060C                                          | PRB1          | YLR180W                 | SAM1          |
| YNL032W                                          | SIW14         | YER044C                 | ERG28         |
| YDL160C                                          | DHH1          | YDR378C                 | LSM6          |
| YGL253W                                          | HXK2          | YDR310C                 | SUM1          |
| YJR056C                                          | YJR056C       | YDL192W                 | ARF1          |
| YML038C                                          | YMD8          | YGL054C                 | ERV14         |
| YFR010W                                          | UBP6          | YDR289C                 | RTT103        |
| YBR030W                                          | YBR030W       | YDR310C                 | SUM1          |
| YOR043W                                          | WHI2          | YDL192W                 | ARF1          |
| YDR264C                                          | AKR1          | YDL047W                 | SIT4          |
| YNL243W                                          | SLA2          | YAL030W                 | SNC1          |
| YJR040W                                          | GEF1          | YPL105C                 | YPL105C       |
| YDL160C                                          | DHH1          | YJL187C                 | SWE1          |
| YHR079C                                          | IRE1          | YFL031W                 | HAC1          |
| YKL101W                                          | HSL1          | YDR310C                 | SUM1          |
| YER139C                                          | YER139C       | YCR053W                 | THR4          |
| YGL212W                                          | VAM7          | YLR320W                 | MMS22         |
| YPL137C                                          | GIP3          | YOL121C                 | RPS19A        |
| YIL076W                                          | SEC28         | YER162C                 | RAD4          |
| YMR095C                                          | SNO1          | YGL003C                 | CDH1          |
| YAL024C                                          | LTE1          | YHR060W                 | VMA22         |
| YBL058W                                          | SHP1          | YJR032W                 | CPR7          |

| Predictions at threshold level 0.80 continued... |               |                         |               |
|--------------------------------------------------|---------------|-------------------------|---------------|
| Gene1 of predicted pair                          |               | Gene2 of predicted pair |               |
| Systematic Name                                  | Standard Name | Systematic Name         | Standard Name |
| YGL115W                                          | SNF4          | YMR214W                 | SCJ1          |
| YMR026C                                          | PEX12         | YGR077C                 | PEX8          |
| YDR244W                                          | PEX5          | YAL055W                 | PEX22         |
| YMR199W                                          | CLN1          | YLR352W                 | YLR352W       |
| YGL190C                                          | CDC55         | YAL011W                 | SWC3          |
| YDL020C                                          | RPN4          | YKL119C                 | VPH2          |
| YMR016C                                          | SOK2          | YFR036W                 | CDC26         |
| YOR145C                                          | PNO1          | YPL240C                 | HSP82         |
| YOR035C                                          | SHE4          | YER139C                 | YER139C       |
| YDR129C                                          | SAC6          | YML071C                 | COG8          |
| YOR140W                                          | SFL1          | YJL095W                 | BCK1          |
| YOR106W                                          | VAM3          | YGL124C                 | MON1          |
| YJL060W                                          | BNA3          | YMR198W                 | CIK1          |
| YPR018W                                          | RLF2          | YGR188C                 | BUB1          |
| YMR055C                                          | BUB2          | YGL163C                 | RAD54         |
| YMR199W                                          | CLN1          | YJR090C                 | GRR1          |
| YDR245W                                          | MNN10         | YDL006W                 | PTC1          |
| YPL037C                                          | EGD1          | YOR066W                 | MSA1          |
| YGL066W                                          | SGF73         | YOR290C                 | SNF2          |
| YJL176C                                          | SWI3          | YJR140C                 | HIR3          |
| YEL065W                                          | SIT1          | YJL095W                 | BCK1          |
| YPL161C                                          | BEM4          | YHR039C-A               | VMA10         |
| YOR195W                                          | SLK19         | YOR080W                 | DIA2          |
| YNL236W                                          | SIN4          | YPL018W                 | CTF19         |
| YJR021C                                          | REC107        | YGL090W                 | LIF1          |
| YMR198W                                          | CIK1          | YPL106C                 | SSE1          |
| YOR327C                                          | SNC2          | YMR311C                 | GLC8          |
| YDR379W                                          | RGA2          | YIL008W                 | URM1          |
| YER107C                                          | GLE2          | YDR485C                 | VPS72         |



| Predictions at threshold level 0.80 continued... |               |                         |               |
|--------------------------------------------------|---------------|-------------------------|---------------|
| Gene1 of predicted pair                          |               | Gene2 of predicted pair |               |
| Systematic Name                                  | Standard Name | Systematic Name         | Standard Name |
| YJL006C                                          | CTK2          | YPR119W                 | CLB2          |
| YFR021W                                          | ATG18         | YML059C                 | NTE1          |
| YBR057C                                          | MUM2          | YLR150W                 | STM1          |
| YPL022W                                          | RAD1          | YNL107W                 | YAF9          |
| YOR069W                                          | VPS5          | YER122C                 | GLO3          |
| YDL006W                                          | PTC1          | YBL101C                 | ECM21         |
| YLR381W                                          | CTF3          | YML112W                 | CTK3          |
| YNR052C                                          | POP2          | YPR120C                 | CLB5          |
| YDR004W                                          | RAD57         | YML028W                 | TSA1          |
| YGR019W                                          | UGA1          | YLR292C                 | SEC72         |
| YCR077C                                          | PAT1          | YNL079C                 | TPM1          |
| YBL103C                                          | RTG3          | YOL081W                 | IRA2          |
| YDR363W-A                                        | SEM1          | YDR071C                 | PAA1          |
| YOR005C                                          | DNL4          | YLR265C                 | NEJ1          |
| YGR184C                                          | UBR1          | YDL155W                 | CLB3          |
| YMR139W                                          | RIM11         | YML099C                 | ARG81         |
| YNL032W                                          | SIW14         | YOR327C                 | SNC2          |
| YER087C-B                                        | SBH1          | YOR026W                 | BUB3          |
| YOL111C                                          | MDY2          | YHR039C-A               | VMA10         |
| YNL264C                                          | PDR17         | YBR194W                 | SOY1          |
| YPR017C                                          | DSS4          | YML001W                 | YPT7          |
| YPL042C                                          | SSN3          | YJL124C                 | LSM1          |
| YAL024C                                          | LTE1          | YGR152C                 | RSR1          |
| YNL079C                                          | TPM1          | YER049W                 | TPA1          |
| YKR035W-A                                        | DID2          | YER040W                 | GLN3          |
| YDR329C                                          | PEX3          | YLR191W                 | PEX13         |
| YMR224C                                          | MRE11         | YGR270W                 | YTA7          |
| YBR084C-A                                        | RPL19A        | YGL163C                 | RAD54         |
| YNL309W                                          | STB1          | YDL047W                 | SIT4          |

| Predictions at threshold level 0.80 continued... |               |                         |               |
|--------------------------------------------------|---------------|-------------------------|---------------|
| Gene1 of predicted pair                          |               | Gene2 of predicted pair |               |
| Systematic Name                                  | Standard Name | Systematic Name         | Standard Name |
| YPL213W                                          | LEA1          | YDL155W                 | CLB3          |
| YML109W                                          | ZDS2          | YMR032W                 | HOF1          |
| YMR016C                                          | SOK2          | YIL038C                 | NOT3          |
| YPL037C                                          | EGD1          | YJR060W                 | CBF1          |
| YMR133W                                          | REC114        | YMR311C                 | GLC8          |
| YJL172W                                          | CPS1          | YPL037C                 | EGD1          |
| YLR058C                                          | SHM2          | YBR200W                 | BEM1          |
| YIL034C                                          | CAP2          | YIL133C                 | RPL16A        |
| YOR033C                                          | EXO1          | YLR352W                 | YLR352W       |
| YEL043W                                          | YEL043W       | YOL108C                 | INO4          |
| YGL033W                                          | HOP2          | YNR072W                 | HXT17         |
| YJL124C                                          | LSM1          | YBL079W                 | NUP170        |
| YMR004W                                          | MVP1          | YEL051W                 | VMA8          |
| YDL160C                                          | DHH1          | YDR507C                 | GIN4          |
| YLR093C                                          | NYV1          | YER040W                 | GLN3          |
| YNL069C                                          | RPL16B        | YJR040W                 | GEF1          |
| YKL025C                                          | PAN3          | YGL094C                 | PAN2          |
| YKR048C                                          | NAP1          | YKL101W                 | HSL1          |
| YJR032W                                          | CPR7          | YJR033C                 | RAV1          |
| YOR112W                                          | CEX1          | YPL120W                 | VPS30         |
| YHR098C                                          | SFB3          | YNL233W                 | BNI4          |
| YOR101W                                          | RAS1          | YGL025C                 | PGD1          |
| YER068W                                          | MOT2          | YGL094C                 | PAN2          |
| YHL006C                                          | SHU1          | YLR376C                 | PSY3          |
| YDR156W                                          | RPA14         | YFR036W                 | CDC26         |
| YBR258C                                          | SHG1          | YHR115C                 | DMA1          |
| YFR031C-A                                        | RPL2A         | YEL053C                 | MAK10         |
| YML103C                                          | NUP188        | YMR125W                 | STO1          |
| YPR017C                                          | DSS4          | YHR012W                 | VPS29         |

| Predictions at threshold level 0.80 continued... |               |                         |               |
|--------------------------------------------------|---------------|-------------------------|---------------|
| Gene1 of predicted pair                          |               | Gene2 of predicted pair |               |
| Systematic Name                                  | Standard Name | Systematic Name         | Standard Name |
| YMR224C                                          | MRE11         | YKL101W                 | HSL1          |
| YJL117W                                          | PHO86         | YMR038C                 | CCS1          |
| YBL102W                                          | SFT2          | YOR327C                 | SNC2          |
| YGR072W                                          | UPF3          | YNR032W                 | PPG1          |
| YNL227C                                          | JJJ1          | YBR119W                 | MUD1          |
| YGR019W                                          | UGA1          | YMR109W                 | MYO5          |
| YAL024C                                          | LTE1          | YNL054W                 | VAC7          |
| YPL115C                                          | BEM3          | YLR234W                 | TOP3          |
| YNL069C                                          | RPL16B        | YHR039C-A               | VMA10         |
| YMR231W                                          | PEP5          | YOR368W                 | RAD17         |
| YKL139W                                          | CTK1          | YOR308C                 | SNU66         |
| YBR057C                                          | MUM2          | YPR120C                 | CLB5          |
| YNL106C                                          | INP52         | YGL031C                 | RPL24A        |
| YDL020C                                          | RPN4          | YGL163C                 | RAD54         |
| YLR216C                                          | CPR6          | YAR014C                 | BUD14         |
| YJL138C                                          | TIF2          | YOL081W                 | IRA2          |
| YIL156W                                          | UBP7          | YKL129C                 | MYO3          |
| YML115C                                          | VAN1          | YMR205C                 | PFK2          |
| YHR178W                                          | STB5          | YDL002C                 | NHP10         |
| YER116C                                          | SLX8          | YHR060W                 | VMA22         |
| YML071C                                          | COG8          | YBR181C                 | RPS6B         |
| YPR084W                                          | YPR084W       | YOL108C                 | INO4          |
| YML115C                                          | VAN1          | YKL080W                 | VMA5          |
| YMR172W                                          | HOT1          | YBR107C                 | IML3          |
| YBR171W                                          | SEC66         | YKL048C                 | ELM1          |
| YFR031C-A                                        | RPL2A         | YLR180W                 | SAM1          |
| YMR198W                                          | CIK1          | YGR014W                 | MSB2          |
| YPR051W                                          | MAK3          | YHR012W                 | VPS29         |
| YGR252W                                          | GCN5          | YIL038C                 | NOT3          |

| Predictions at threshold level 0.80 continued... |               |                         |               |
|--------------------------------------------------|---------------|-------------------------|---------------|
| Gene1 of predicted pair                          |               | Gene2 of predicted pair |               |
| Systematic Name                                  | Standard Name | Systematic Name         | Standard Name |
| YOR106W                                          | VAM3          | YLR371W                 | ROM2          |
| YLR095C                                          | IOC2          | YNR072W                 | HXT17         |
| YMR109W                                          | MYO5          | YJL183W                 | MNN11         |
| YMR199W                                          | CLN1          | YHR205W                 | SCH9          |
| YEL065W                                          | SIT1          | YNL236W                 | SIN4          |
| YNL215W                                          | IES2          | YOR001W                 | RRP6          |
| YMR080C                                          | NAM7          | YGR071C                 | YGR071C       |
| YLR337C                                          | VRP1          | YBR108W                 | YBR108W       |
| YOR127W                                          | RGA1          | YPL253C                 | VIK1          |
| YJL127C                                          | SPT10         | YPR120C                 | CLB5          |
| YLR360W                                          | VPS38         | YCL001W                 | RER1          |
| YKL025C                                          | PAN3          | YLR386W                 | VAC14         |
| YLR135W                                          | SLX4          | YCL037C                 | SRO9          |
| YOR127W                                          | RGA1          | YJL095W                 | BCK1          |
| YJR032W                                          | CPR7          | YML071C                 | COG8          |
| YMR080C                                          | NAM7          | YJL176C                 | SWI3          |
| YBR131W                                          | CCZ1          | YER122C                 | GLO3          |
| YIL076W                                          | SEC28         | YBL025W                 | RRN10         |
| YPR036W                                          | VMA13         | YEL053C                 | MAK10         |
| YLR090W                                          | XDJ1          | YML071C                 | COG8          |
| YBL103C                                          | RTG3          | YOR043W                 | WHI2          |
| YDL020C                                          | RPN4          | YER116C                 | SLX8          |
| YOL051W                                          | GAL11         | YPL248C                 | GAL4          |
| YGL237C                                          | HAP2          | YDR289C                 | RTT103        |
| YER144C                                          | UBP5          | YNL238W                 | KEX2          |
| YNL291C                                          | MID1          | YNR032W                 | PPG1          |
| YOR080W                                          | DIA2          | YGL115W                 | SNF4          |
| YBL103C                                          | RTG3          | YEL053C                 | MAK10         |
| YBL021C                                          | HAP3          | YGL237C                 | HAP2          |

| Predictions at threshold level 0.80 continued... |               |                         |               |
|--------------------------------------------------|---------------|-------------------------|---------------|
| Gene1 of predicted pair                          |               | Gene2 of predicted pair |               |
| Systematic Name                                  | Standard Name | Systematic Name         | Standard Name |
| YFR031C-A                                        | RPL2A         | YJL183W                 | MNN11         |
| YGL223C                                          | COG1          | YNR049C                 | MSO1          |
| YJL095W                                          | BCK1          | YAL002W                 | VPS8          |
| YPL042C                                          | SSN3          | YNL107W                 | YAF9          |
| YBR126C                                          | TPS1          | YNR072W                 | HXT17         |
| YLR441C                                          | RPS1A         | YOL121C                 | RPS19A        |
| YNL325C                                          | FIG4          | YPL137C                 | GIP3          |
| YMR224C                                          | MRE11         | YJR090C                 | GRR1          |
| YMR153W                                          | NUP53         | YOL111C                 | MDY2          |
| YMR224C                                          | MRE11         | YPL256C                 | CLN2          |
| YPL183C                                          | YPL183C       | YBR061C                 | TRM7          |
| YBL008W                                          | HIR1          | YDR363W-A               | SEM1          |
| YPL161C                                          | BEM4          | YGR188C                 | BUB1          |
| YPR120C                                          | CLB5          | YOR038C                 | HIR2          |
| YPR018W                                          | RLF2          | YOL051W                 | GAL11         |
| YPL253C                                          | VIK1          | YLR399C                 | BDF1          |
| YDR225W                                          | HTA1          | YBR111W-A               | SUS1          |
| YGL178W                                          | MPT5          | YGR252W                 | GCN5          |
| YDL223C                                          | HBT1          | YNR072W                 | HXT17         |
| YGL025C                                          | PGD1          | YNL058C                 | YNL058C       |
| YMR202W                                          | ERG2          | YGL003C                 | CDH1          |
| YEL043W                                          | YEL043W       | YNL107W                 | YAF9          |
| YJL176C                                          | SWI3          | YOR243C                 | PUS7          |
| YHR098C                                          | SFB3          | YGL054C                 | ERV14         |
| YMR116C                                          | ASC1          | YEL036C                 | ANP1          |
| YJL176C                                          | SWI3          | YDR385W                 | EFT2          |
| YEL053C                                          | MAK10         | YEL051W                 | VMA8          |
| YOR112W                                          | CEX1          | YCL001W                 | RER1          |
| YER114C                                          | BOI2          | YHR115C                 | DMA1          |

| Predictions at threshold level 0.80 continued... |               |                         |               |
|--------------------------------------------------|---------------|-------------------------|---------------|
| Gene1 of predicted pair                          |               | Gene2 of predicted pair |               |
| Systematic Name                                  | Standard Name | Systematic Name         | Standard Name |
| YJR063W                                          | RPA12         | YPR120C                 | CLB5          |
| YHR206W                                          | SKN7          | YOR208W                 | PTP2          |
| YOR127W                                          | RGA1          | YNL107W                 | YAF9          |
| YEL027W                                          | CUP5          | YEL051W                 | VMA8          |
| YOR337W                                          | TEA1          | YBL103C                 | RTG3          |
| YDR080W                                          | VPS41         | YLR093C                 | NYV1          |
| YBL047C                                          | EDE1          | YOL081W                 | IRA2          |
| YGL066W                                          | SGF73         | YKL048C                 | ELM1          |
| YFR032C-A                                        | RPL29         | YPL089C                 | RLM1          |
| YGR105W                                          | VMA21         | YLR131C                 | ACE2          |
| YFR034C                                          | PHO4          | YNL289W                 | PCL1          |
| YPL129W                                          | TAF14         | YNL236W                 | SIN4          |
| YMR164C                                          | MSS11         | YMR273C                 | ZDS1          |
| YML112W                                          | CTK3          | YAR014C                 | BUD14         |
| YFL013C                                          | IES1          | YCL037C                 | SRO9          |
| YDL185W                                          | TFP1          | YMR054W                 | STV1          |
| YGL100W                                          | SEH1          | YOR368W                 | RAD17         |
| YIL076W                                          | SEC28         | YDL077C                 | VAM6          |
| YDR076W                                          | RAD55         | YKL114C                 | APN1          |
| YPR131C                                          | NAT3          | YML102W                 | CAC2          |
| YDR293C                                          | SSD1          | YGR105W                 | VMA21         |
| YNL206C                                          | RTT106        | YKR048C                 | NAP1          |
| YGR188C                                          | BUB1          | YNL107W                 | YAF9          |
| YPL022W                                          | RAD1          | YLR370C                 | ARC18         |
| YMR199W                                          | CLN1          | YMR273C                 | ZDS1          |
| YBR030W                                          | YBR030W       | YML001W                 | YPT7          |
| YFR010W                                          | UBP6          | YCL037C                 | SRO9          |
| YDR477W                                          | SNF1          | YDL229W                 | SSB1          |
| YNR031C                                          | SSK2          | YPR119W                 | CLB2          |

| Predictions at threshold level 0.80 continued... |               |                         |               |
|--------------------------------------------------|---------------|-------------------------|---------------|
| Gene1 of predicted pair                          |               | Gene2 of predicted pair |               |
| Systematic Name                                  | Standard Name | Systematic Name         | Standard Name |
| YNL087W                                          | TCB2          | YER162C                 | RAD4          |
| YGL175C                                          | SAE2          | YBR082C                 | UBC4          |
| YDR080W                                          | VPS41         | YJR060W                 | CBF1          |
| YMR016C                                          | SOK2          | YJL172W                 | CPS1          |
| YOR308C                                          | SNU66         | YML097C                 | VPS9          |
| YOR066W                                          | MSA1          | YBR280C                 | SAF1          |
| YMR038C                                          | CCS1          | YKL114C                 | APN1          |
| YML103C                                          | NUP188        | YKL068W                 | NUP100        |
| YLR254C                                          | NDL1          | YOL081W                 | IRA2          |
| YBR009C                                          | HHF1          | YDR071C                 | PAA1          |
| YLL039C                                          | UBI4          | YJL183W                 | MNN11         |
| YLR148W                                          | PEP3          | YML001W                 | YPT7          |
| YDL005C                                          | MED2          | YPL248C                 | GAL4          |
| YOR043W                                          | WHI2          | YLR452C                 | SST2          |
| YHR013C                                          | ARD1          | YJR135C                 | MCM22         |
| YGR104C                                          | SRB5          | YOR038C                 | HIR2          |
| YMR133W                                          | REC114        | YGL124C                 | MON1          |
| YAL024C                                          | LTE1          | YPL024W                 | RMI1          |
| YCR088W                                          | ABP1          | YGL095C                 | VPS45         |
| YGR270W                                          | YTA7          | YPL018W                 | CTF19         |
| YPL161C                                          | BEM4          | YBL101C                 | ECM21         |
| YDR293C                                          | SSD1          | YEL053C                 | MAK10         |
| YDR129C                                          | SAC6          | YPL050C                 | MNN9          |
| YNL016W                                          | PUB1          | YGL175C                 | SAE2          |
| YPL057C                                          | SUR1          | YDR335W                 | MSN5          |
| YFR030W                                          | MET10         | YOL054W                 | PSH1          |
| YER162C                                          | RAD4          | YCR053W                 | THR4          |
| YNL215W                                          | IES2          | YOR080W                 | DIA2          |
| YDR260C                                          | SWM1          | YHR200W                 | RPN10         |

| Predictions at threshold level 0.80 continued... |               |                         |               |
|--------------------------------------------------|---------------|-------------------------|---------------|
| Gene1 of predicted pair                          |               | Gene2 of predicted pair |               |
| Systematic Name                                  | Standard Name | Systematic Name         | Standard Name |
| YER139C                                          | YER139C       | YGL124C                 | MON1          |
| YLR441C                                          | RPS1A         | YJL095W                 | BCK1          |
| YCL037C                                          | SRO9          | YOL108C                 | INO4          |
| YML115C                                          | VAN1          | YHR039C-A               | VMA10         |
| YOR069W                                          | VPS5          | YDR137W                 | RGP1          |
| YNL243W                                          | SLA2          | YLR332W                 | MID2          |
| YNL051W                                          | COG5          | YKR030W                 | GMH1          |
| YLR079W                                          | SIC1          | YGR270W                 | YTA7          |
| YOR106W                                          | VAM3          | YML028W                 | TSA1          |
| YMR153W                                          | NUP53         | YER040W                 | GLN3          |
| YML115C                                          | VAN1          | YMR311C                 | GLC8          |
| YLR313C                                          | SPH1          | YGL031C                 | RPL24A        |
| YNL032W                                          | SIW14         | YDL223C                 | HBT1          |
| YOR023C                                          | AHC1          | YMR109W                 | MYO5          |
| YPL018W                                          | CTF19         | YHR115C                 | DMA1          |
| YDR110W                                          | FOB1          | YPR101W                 | SNT309        |
| YML013W                                          | UBX2          | YDR310C                 | SUM1          |
| YMR198W                                          | CIK1          | YKR001C                 | VPS1          |
| YOL121C                                          | RPS19A        | YLR370C                 | ARC18         |
| YDR484W                                          | VPS52         | YLR320W                 | MMS22         |
| YBR112C                                          | CYC8          | YGL035C                 | MIG1          |
| YBR228W                                          | SLX1          | YML028W                 | TSA1          |
| YOR127W                                          | RGA1          | YOR069W                 | VPS5          |
| YPR084W                                          | YPR084W       | YDL077C                 | VAM6          |
| YLR094C                                          | GIS3          | YNL041C                 | COG6          |
| YKR099W                                          | BAS1          | YPR046W                 | MCM16         |
| YLR079W                                          | SIC1          | YJR059W                 | PTK2          |
| YMR004W                                          | MVP1          | YML038C                 | YMD8          |
| YOR080W                                          | DIA2          | YMR179W                 | SPT21         |



| Predictions at threshold level 0.80 continued... |               |                         |               |
|--------------------------------------------------|---------------|-------------------------|---------------|
| Gene1 of predicted pair                          |               | Gene2 of predicted pair |               |
| Systematic Name                                  | Standard Name | Systematic Name         | Standard Name |
| YDL013W                                          | SLX5          | YJR035W                 | RAD26         |
| YIR009W                                          | MSL1          | YGL031C                 | RPL24A        |
| YDR310C                                          | SUM1          | YLR182W                 | SWI6          |
| YDR484W                                          | VPS52         | YGL212W                 | VAM7          |
| YBR030W                                          | YBR030W       | YMR016C                 | SOK2          |
| YGR072W                                          | UPF3          | YPL105C                 | YPL105C       |
| YEL027W                                          | CUP5          | YGR105W                 | VMA21         |
| YJR040W                                          | GEF1          | YAL002W                 | VPS8          |
| YPL042C                                          | SSN3          | YOL145C                 | CTR9          |
| YDR137W                                          | RGP1          | YLR131C                 | ACE2          |
| YHL031C                                          | GOS1          | YNR032W                 | PPG1          |
| YNL069C                                          | RPL16B        | YOR069W                 | VPS5          |
| YMR205C                                          | PFK2          | YBR041W                 | FAT1          |
| YLR083C                                          | EMP70         | YGR105W                 | VMA21         |
| YHL020C                                          | OPI1          | YMR054W                 | STV1          |
| YLR386W                                          | VAC14         | YKR061W                 | KTR2          |
| YGR081C                                          | SLX9          | YML102W                 | CAC2          |
| YDR443C                                          | SSN2          | YDR245W                 | MNN10         |
| YHR052W                                          | CIC1          | YER002W                 | NOP16         |
| YLR410W                                          | VIP1          | YGL175C                 | SAE2          |
| YML016C                                          | PPZ1          | YBR260C                 | RGD1          |
| YMR026C                                          | PEX12         | YOR035C                 | SHE4          |
| YBR274W                                          | CHK1          | YLR032W                 | RAD5          |
| YBR173C                                          | UMP1          | YOL121C                 | RPS19A        |
| YCR077C                                          | PAT1          | YPR046W                 | MCM16         |
| YFR031C-A                                        | RPL2A         | YNL076W                 | MKS1          |
| YEL053C                                          | MAK10         | YLR320W                 | MMS22         |
| YEL065W                                          | SIT1          | YJL172W                 | CPS1          |
| YLR095C                                          | IOC2          | YLR370C                 | ARC18         |

| Predictions at threshold level 0.80 continued... |               |                         |               |
|--------------------------------------------------|---------------|-------------------------|---------------|
| Gene1 of predicted pair                          |               | Gene2 of predicted pair |               |
| Systematic Name                                  | Standard Name | Systematic Name         | Standard Name |
| YLR083C                                          | EMP70         | YMR216C                 | SKY1          |
| YPL037C                                          | EGD1          | YHR039C-A               | VMA10         |
| YMR016C                                          | SOK2          | YDR310C                 | SUM1          |
| YOR043W                                          | WHI2          | YDL083C                 | RPS16B        |
| YBR173C                                          | UMP1          | YMR133W                 | REC114        |
| YMR055C                                          | BUB2          | YOL081W                 | IRA2          |
| YHR200W                                          | RPN10         | YOR043W                 | WHI2          |
| YDR320C                                          | SWA2          | YOR109W                 | INP53         |
| YMR198W                                          | CIK1          | YOL091W                 | SPO21         |
| YIL053W                                          | RHR2          | YMR224C                 | MRE11         |
| YHR081W                                          | LRP1          | YDR310C                 | SUM1          |
| YHR156C                                          | LIN1          | YBR217W                 | ATG12         |
| YEL056W                                          | HAT2          | YDR310C                 | SUM1          |
| YKR020W                                          | VPS51         | YOL108C                 | INO4          |
| YDL223C                                          | HBT1          | YGR135W                 | PRE9          |
| YKR057W                                          | RPS21A        | YDR264C                 | AKR1          |
| YFL023W                                          | BUD27         | YLR370C                 | ARC18         |
| YKR001C                                          | VPS1          | YKL080W                 | VMA5          |
| YFR031C-A                                        | RPL2A         | YJR060W                 | CBF1          |
| YOR132W                                          | VPS17         | YDR080W                 | VPS41         |
| YDR108W                                          | GSG1          | YMR054W                 | STV1          |
| YPL022W                                          | RAD1          | YNL236W                 | SIN4          |
| YFR010W                                          | UBP6          | YDR137W                 | RGP1          |
| YNL201C                                          | PSY2          | YGL252C                 | RTG2          |
| YBR215W                                          | HPC2          | YJR060W                 | CBF1          |
| YLR216C                                          | CPR6          | YHR200W                 | RPN10         |
| YML001W                                          | YPT7          | YDR358W                 | GGA1          |
| YGL087C                                          | MMS2          | YMR055C                 | BUB2          |
| YJL176C                                          | SWI3          | YJL006C                 | CTK2          |

| Predictions at threshold level 0.80 continued... |               |                         |               |
|--------------------------------------------------|---------------|-------------------------|---------------|
| Gene1 of predicted pair                          |               | Gene2 of predicted pair |               |
| Systematic Name                                  | Standard Name | Systematic Name         | Standard Name |
| YNL201C                                          | PSY2          | YAL024C                 | LTE1          |
| YMR068W                                          | AVO2          | YIL105C                 | SLM1          |
| YPR171W                                          | BSP1          | YDR310C                 | SUM1          |
| YFR040W                                          | SAP155        | YOR035C                 | SHE4          |
| YLL007C                                          | YLL007C       | YPL253C                 | VIK1          |
| YOR290C                                          | SNF2          | YNL076W                 | MKS1          |
| YGR252W                                          | GCN5          | YPR120C                 | CLB5          |
| YJL036W                                          | SNX4          | YNL041C                 | COG6          |
| YPR017C                                          | DSS4          | YPL161C                 | BEM4          |
| YGL147C                                          | RPL9A         | YOR290C                 | SNF2          |
| YKR020W                                          | VPS51         | YFR036W                 | CDC26         |
| YHR178W                                          | STB5          | YJR032W                 | CPR7          |
| YAL024C                                          | LTE1          | YCR053W                 | THR4          |
| YLR234W                                          | TOP3          | YHR114W                 | BZZ1          |
| YBL051C                                          | PIN4          | YPR051W                 | MAK3          |
| YPL057C                                          | SUR1          | YGL115W                 | SNF4          |
| YMR016C                                          | SOK2          | YER139C                 | YER139C       |
| YDR507C                                          | GIN4          | YPL161C                 | BEM4          |
| YPR018W                                          | RLF2          | YNL307C                 | MCK1          |
| YLR119W                                          | SRN2          | YCR053W                 | THR4          |
| YEL065W                                          | SIT1          | YGL147C                 | RPL9A         |
| YHR039C-A                                        | VMA10         | YDR358W                 | GGA1          |
| YIL103W                                          | DPH1          | YPL018W                 | CTF19         |
| YNL215W                                          | IES2          | YCR077C                 | PAT1          |
| YDR320C                                          | SWA2          | YEL053C                 | MAK10         |
| YDL047W                                          | SIT4          | YMR038C                 | CCS1          |
| YMR204C                                          | INP1          | YBR168W                 | PEX32         |
| YOR106W                                          | VAM3          | YPL195W                 | APL5          |
| YKR020W                                          | VPS51         | YEL036C                 | ANP1          |

| Predictions at threshold level 0.80 continued... |               |                         |               |
|--------------------------------------------------|---------------|-------------------------|---------------|
| Gene1 of predicted pair                          |               | Gene2 of predicted pair |               |
| Systematic Name                                  | Standard Name | Systematic Name         | Standard Name |
| YLR234W                                          | TOP3          | YBR108W                 | YBR108W       |
| YKL006W                                          | RPL14A        | YKR020W                 | VPS51         |
| YNL218W                                          | MGS1          | YJL176C                 | SWI3          |
| YNL087W                                          | TCB2          | YGL013C                 | PDR1          |
| YDL116W                                          | NUP84         | YMR179W                 | SPT21         |
| YIL036W                                          | CST6          | YLR381W                 | CTF3          |
| YML112W                                          | CTK3          | YLR182W                 | SWI6          |
| YOR290C                                          | SNF2          | YLR399C                 | BDF1          |
| YCR024C-A                                        | PMP1          | YPL178W                 | CBC2          |
| YNL201C                                          | PSY2          | YIR005W                 | IST3          |
| YBL021C                                          | HAP3          | YHR012W                 | VPS29         |
| YMR153W                                          | NUP53         | YJR056C                 | YJR056C       |
| YLR150W                                          | STM1          | YLR032W                 | RAD5          |
| YNR072W                                          | HXT17         | YDR207C                 | UME6          |
| YHR012W                                          | VPS29         | YNL238W                 | KEX2          |
| YNL238W                                          | KEX2          | YLR093C                 | NYV1          |
| YDR293C                                          | SSD1          | YDR289C                 | RTT103        |
| YEL009C                                          | GCN4          | YGL025C                 | PGD1          |
| YJR056C                                          | YJR056C       | YGL115W                 | SNF4          |
| YGL212W                                          | VAM7          | YGL252C                 | RTG2          |
| YLR452C                                          | SST2          | YMR052W                 | FAR3          |
| YCR097W                                          | HMRA1         | YCL067C                 | HMLALPHA2     |
| YBR200W                                          | BEM1          | YJR005W                 | APL1          |
| YHR200W                                          | RPN10         | YLR357W                 | RSC2          |
| YLR148W                                          | PEP3          | YOR106W                 | VAM3          |
| YOR195W                                          | SLK19         | YPL057C                 | SUR1          |
| YDR146C                                          | SWI5          | YOL081W                 | IRA2          |
| YER116C                                          | SLX8          | YNL076W                 | MKS1          |
| YMR199W                                          | CLN1          | YJL157C                 | FAR1          |

| Predictions at threshold level 0.80 continued... |               |                         |               |
|--------------------------------------------------|---------------|-------------------------|---------------|
| Gene1 of predicted pair                          |               | Gene2 of predicted pair |               |
| Systematic Name                                  | Standard Name | Systematic Name         | Standard Name |
| YBR108W                                          | YBR108W       | YNR072W                 | HXT17         |
| YDL184C                                          | RPL41A        | YMR016C                 | SOK2          |
| YBR107C                                          | IML3          | YGR270W                 | YTA7          |
| YKR014C                                          | YPT52         | YML071C                 | COG8          |
| YOR033C                                          | EXO1          | YLR135W                 | SLX4          |
| YDL116W                                          | NUP84         | YKL110C                 | KTI12         |
| YMR199W                                          | CLN1          | YDL047W                 | SIT4          |
| YOR212W                                          | STE4          | YJR086W                 | STE18         |
| YGR252W                                          | GCN5          | YDR227W                 | SIR4          |
| YCR077C                                          | PAT1          | YOR368W                 | RAD17         |
| YGL087C                                          | MMS2          | YER110C                 | KAP123        |
| YDR383C                                          | NKP1          | YGL163C                 | RAD54         |
| YPL240C                                          | HSP82         | YNL086W                 | YNL086W       |
| YBR030W                                          | YBR030W       | YPL057C                 | SUR1          |
| YDL155W                                          | CLB3          | YLR425W                 | TUS1          |
| YBL058W                                          | SHP1          | YGL115W                 | SNF4          |
| YMR153W                                          | NUP53         | YER162C                 | RAD4          |
| YML115C                                          | VAN1          | YDR440W                 | DOT1          |
| YKR101W                                          | SIR1          | YFR036W                 | CDC26         |
| YML038C                                          | YMD8          | YAR014C                 | BUD14         |
| YGL147C                                          | RPL9A         | YMR311C                 | GLC8          |
| YGL066W                                          | SGF73         | YHR108W                 | GGA2          |
| YLR398C                                          | SKI2          | YDR207C                 | UME6          |
| YLR006C                                          | SSK1          | YNL293W                 | MSB3          |
| YNL087W                                          | TCB2          | YNL307C                 | MCK1          |
| YCR034W                                          | FEN1          | YBL008W                 | HIR1          |
| YBR239C                                          | YBR239C       | YHR016C                 | YSC84         |
| YPL256C                                          | CLN2          | YHR158C                 | KEL1          |
| YLR079W                                          | SIC1          | YHR152W                 | SPO12         |

| Predictions at threshold level 0.80 continued... |               |                         |               |
|--------------------------------------------------|---------------|-------------------------|---------------|
| Gene1 of predicted pair                          |               | Gene2 of predicted pair |               |
| Systematic Name                                  | Standard Name | Systematic Name         | Standard Name |
| YDR156W                                          | RPA14         | YLR386W                 | VAC14         |
| YBL103C                                          | RTG3          | YLR371W                 | ROM2          |
| YNL079C                                          | TPM1          | YGR135W                 | PRE9          |
| YGL078C                                          | DBP3          | YBR280C                 | SAF1          |
| YPL129W                                          | TAF14         | YIR009W                 | MSL1          |
| YLR090W                                          | XDJ1          | YGL115W                 | SNF4          |
| YGL135W                                          | RPL1B         | YDR137W                 | RGP1          |
| YDR137W                                          | RGP1          | YLR180W                 | SAM1          |
| YNL248C                                          | RPA49         | YNL307C                 | MCK1          |
| YLR337C                                          | VRP1          | YDR289C                 | RTT103        |
| YNL289W                                          | PCL1          | YKR048C                 | NAP1          |
| YDR004W                                          | RAD57         | YLR288C                 | MEC3          |
| YNL293W                                          | MSB3          | YNR049C                 | MSO1          |
| YIL036W                                          | CST6          | YPR120C                 | CLB5          |
| YMR199W                                          | CLN1          | YOR106W                 | VAM3          |
| YJR032W                                          | CPR7          | YGL003C                 | CDH1          |
| YGL174W                                          | BUD13         | YJL124C                 | LSM1          |
| YKR048C                                          | NAP1          | YGL124C                 | MON1          |
| YIL076W                                          | SEC28         | YGR270W                 | YTA7          |
| YHR134W                                          | WSS1          | YNL107W                 | YAF9          |
| YPL019C                                          | VTC3          | YER072W                 | VTC1          |
| YFR010W                                          | UBP6          | YOR368W                 | RAD17         |
| YKR057W                                          | RPS21A        | YIL008W                 | URM1          |
| YIL076W                                          | SEC28         | YDR335W                 | MSN5          |
| YDL020C                                          | RPN4          | YMR199W                 | CLN1          |
| YDR202C                                          | RAV2          | YKR030W                 | GMH1          |
| YJL004C                                          | SYS1          | YDR207C                 | UME6          |
| YGL212W                                          | VAM7          | YLR094C                 | GIS3          |
| YLR119W                                          | SRN2          | YMR016C                 | SOK2          |

| Predictions at threshold level 0.80 continued... |               |                         |               |
|--------------------------------------------------|---------------|-------------------------|---------------|
| Gene1 of predicted pair                          |               | Gene2 of predicted pair |               |
| Systematic Name                                  | Standard Name | Systematic Name         | Standard Name |
| YDL116W                                          | NUP84         | YDR378C                 | LSM6          |
| YKL025C                                          | PAN3          | YML058W                 | SML1          |
| YMR016C                                          | SOK2          | YPR030W                 | CSR2          |
| YPR131C                                          | NAT3          | YDL226C                 | GCS1          |
| YKL116C                                          | PRR1          | YMR153W                 | NUP53         |
| YBR057C                                          | MUM2          | YPL050C                 | MNN9          |
| YAL024C                                          | LTE1          | YDR293C                 | SSD1          |
| YOR270C                                          | VPH1          | YGL115W                 | SNF4          |
| YKL116C                                          | PRR1          | YOR043W                 | WHI2          |
| YBR009C                                          | HHF1          | YBR010W                 | HHT1          |
| YMR016C                                          | SOK2          | YNL041C                 | COG6          |
| YKL048C                                          | ELM1          | YLR320W                 | MMS22         |
| YDR108W                                          | GSG1          | YHL020C                 | OPI1          |
| YFR036W                                          | CDC26         | YDR310C                 | SUM1          |
| YPL180W                                          | TCO89         | YGL200C                 | EMP24         |
| YBR057C                                          | MUM2          | YNL307C                 | MCK1          |
| YDL184C                                          | RPL41A        | YEL053C                 | MAK10         |
| YGR133W                                          | PEX4          | YJL095W                 | BCK1          |
| YOR290C                                          | SNF2          | YLR441C                 | RPS1A         |
| YER162C                                          | RAD4          | YLR370C                 | ARC18         |
| YAL010C                                          | MDM10         | YOL081W                 | IRA2          |
| YBL051C                                          | PIN4          | YBL021C                 | HAP3          |
| YJL176C                                          | SWI3          | YKL109W                 | HAP4          |
| YAL020C                                          | ATS1          | YJL187C                 | SWE1          |
| YHL031C                                          | GOS1          | YER161C                 | SPT2          |
| YDR176W                                          | NGG1          | YOL051W                 | GAL11         |
| YDR174W                                          | HMO1          | YDR183W                 | PLP1          |
| YCR020C-A                                        | MAK31         | YDR108W                 | GSG1          |
| YGL087C                                          | MMS2          | YGL163C                 | RAD54         |

| Predictions at threshold level 0.80 continued... |               |                         |               |
|--------------------------------------------------|---------------|-------------------------|---------------|
| Gene1 of predicted pair                          |               | Gene2 of predicted pair |               |
| Systematic Name                                  | Standard Name | Systematic Name         | Standard Name |
| YGR249W                                          | MGA1          | YPR046W                 | MCM16         |
| YER044C                                          | ERG28         | YDR358W                 | GGA1          |
| YKL139W                                          | CTK1          | YJL124C                 | LSM1          |
| YNL288W                                          | CAF40         | YDL155W                 | CLB3          |
| YDR004W                                          | RAD57         | YPL018W                 | CTF19         |
| YGL190C                                          | CDC55         | YER027C                 | GAL83         |
| YDR443C                                          | SSN2          | YBR260C                 | RGD1          |
| YOR195W                                          | SLK19         | YPL106C                 | SSE1          |
| YLR148W                                          | PEP3          | YBR131W                 | CCZ1          |
| YGL066W                                          | SGF73         | YDL155W                 | CLB3          |
| YFR010W                                          | UBP6          | YEL013W                 | VAC8          |
| YHR200W                                          | RPN10         | YML001W                 | YPT7          |
| YMR004W                                          | MVP1          | YML001W                 | YPT7          |
| YKL139W                                          | CTK1          | YJL006C                 | CTK2          |
| YDR245W                                          | MNN10         | YPL256C                 | CLN2          |
| YGR100W                                          | MDR1          | YPR028W                 | YOP1          |
| YNL079C                                          | TPM1          | YOL081W                 | IRA2          |
| YMR243C                                          | ZRC1          | YPL058C                 | PDR12         |
| YPR084W                                          | YPR084W       | YAL002W                 | VPS8          |
| YGR133W                                          | PEX4          | YOR035C                 | SHE4          |
| YPR051W                                          | MAK3          | YGL253W                 | HXK2          |
| YJL006C                                          | CTK2          | YOL081W                 | IRA2          |
| YJR032W                                          | CPR7          | YKL101W                 | HSL1          |
| YKR035W-A                                        | DID2          | YLR094C                 | GIS3          |
| YDR080W                                          | VPS41         | YAR014C                 | BUD14         |
| YOR132W                                          | VPS17         | YCR086W                 | CSM1          |
| YDR363W-A                                        | SEM1          | YNL107W                 | YAF9          |
| YGR072W                                          | UPF3          | YNL291C                 | MID1          |
| YDL184C                                          | RPL41A        | YMR230W                 | RPS10B        |



| Predictions at threshold level 0.80 continued... |               |                         |               |
|--------------------------------------------------|---------------|-------------------------|---------------|
| Gene1 of predicted pair                          |               | Gene2 of predicted pair |               |
| Systematic Name                                  | Standard Name | Systematic Name         | Standard Name |
| YDR379W                                          | RGA2          | YNL229C                 | URE2          |
| YJR024C                                          | MDE1          | YKL068W                 | NUP100        |
| YHR013C                                          | ARD1          | YBR082C                 | UBC4          |
| YJR032W                                          | CPR7          | YER139C                 | YER139C       |
| YHR156C                                          | LIN1          | YJR056C                 | YJR056C       |
| YDR146C                                          | SWI5          | YGR089W                 | NNF2          |
| YDR202C                                          | RAV2          | YNL051W                 | COG5          |
| YPL240C                                          | HSP82         | YGR294W                 | PAU12         |
| YNL135C                                          | FPR1          | YHR012W                 | VPS29         |
| YIR005W                                          | IST3          | YHR167W                 | THP2          |
| YDL184C                                          | RPL41A        | YER139C                 | YER139C       |
| YGR249W                                          | MGA1          | YMR142C                 | RPL13B        |
| YCL037C                                          | SRO9          | YHR167W                 | THP2          |
| YNL289W                                          | PCL1          | YJL095W                 | BCK1          |
| YNL025C                                          | SSN8          | YDR440W                 | DOT1          |
| YFL013C                                          | IES1          | YKL139W                 | CTK1          |
| YDR439W                                          | LRS4          | YDR335W                 | MSN5          |
| YJL204C                                          | RCY1          | YAL030W                 | SNC1          |
| YAL024C                                          | LTE1          | YHR115C                 | DMA1          |
| YPL161C                                          | BEM4          | YCR077C                 | PAT1          |
| YGL115W                                          | SNF4          | YNL041C                 | COG6          |
| YPL024W                                          | RMI1          | YMR224C                 | MRE11         |
| YMR198W                                          | CIK1          | YJR135C                 | MCM22         |
| YBL071W-A                                        | KTI11         | YHR187W                 | IKI1          |
| YDR440W                                          | DOT1          | YOR141C                 | ARP8          |
| YEL044W                                          | IES6          | YBL047C                 | EDE1          |
| YHL031C                                          | GOS1          | YJL124C                 | LSM1          |
| YDR174W                                          | HMO1          | YGL252C                 | RTG2          |
| YHR060W                                          | VMA22         | YGR105W                 | VMA21         |

| Predictions at threshold level 0.80 continued... |               |                         |               |
|--------------------------------------------------|---------------|-------------------------|---------------|
| Gene1 of predicted pair                          |               | Gene2 of predicted pair |               |
| Systematic Name                                  | Standard Name | Systematic Name         | Standard Name |
| YNL068C                                          | FKH2          | YPL161C                 | BEM4          |
| YFR010W                                          | UBP6          | YKR099W                 | BAS1          |
| YFR031C-A                                        | RPL2A         | YOR066W                 | MSA1          |
| YBR200W                                          | BEM1          | YPL256C                 | CLN2          |
| YMR153W                                          | NUP53         | YDR207C                 | UME6          |
| YMR199W                                          | CLN1          | YPL178W                 | CBC2          |
| YBR200W                                          | BEM1          | YFL023W                 | BUD27         |
| YPL037C                                          | EGD1          | YER040W                 | GLN3          |
| YLR150W                                          | STM1          | YKL101W                 | HSL1          |
| YBR173C                                          | UMP1          | YOR327C                 | SNC2          |
| YBR065C                                          | ECM2          | YPL213W                 | LEA1          |
| YAL024C                                          | LTE1          | YMR133W                 | REC114        |
| YBR107C                                          | IML3          | YDR144C                 | MKC7          |
| YLR090W                                          | XDJ1          | YNR072W                 | HXT17         |
| YBR289W                                          | SNF5          | YNL030W                 | HHF2          |
| YDL065C                                          | PEX19         | YGR209C                 | TRX2          |
| YJL117W                                          | PHO86         | YDL006W                 | PTC1          |
| YMR224C                                          | MRE11         | YOL081W                 | IRA2          |
| YNL127W                                          | FAR11         | YAR014C                 | BUD14         |
| YDL083C                                          | RPS16B        | YPR046W                 | MCM16         |
| YNL054W                                          | VAC7          | YIL103W                 | DPH1          |
| YJL154C                                          | VPS35         | YMR127C                 | SAS2          |
| YOR358W                                          | HAP5          | YBR114W                 | RAD16         |
| YKR020W                                          | VPS51         | YLR396C                 | VPS33         |
| YGL033W                                          | HOP2          | YKR035W-A               | DID2          |
| YPL024W                                          | RMI1          | YMR016C                 | SOK2          |
| YPL178W                                          | CBC2          | YBL079W                 | NUP170        |
| YDR293C                                          | SSD1          | YLR182W                 | SWI6          |
| YML058W                                          | SML1          | YLR234W                 | TOP3          |

| Predictions at threshold level 0.80 continued... |               |                         |               |
|--------------------------------------------------|---------------|-------------------------|---------------|
| Gene1 of predicted pair                          |               | Gene2 of predicted pair |               |
| Systematic Name                                  | Standard Name | Systematic Name         | Standard Name |
| YLL007C                                          | YLL007C       | YDR144C                 | MKC7          |
| YMR224C                                          | MRE11         | YOR270C                 | VPH1          |
| YGL078C                                          | DBP3          | YKL116C                 | PRR1          |
| YPR046W                                          | MCM16         | YDL192W                 | ARF1          |
| YLR079W                                          | SIC1          | YML095C                 | RAD10         |
| YER096W                                          | SHC1          | YGL031C                 | RPL24A        |
| YML117W                                          | NAB6          | YBR200W                 | BEM1          |
| YJL095W                                          | BCK1          | YOL067C                 | RTG1          |
| YLR006C                                          | SSK1          | YMR052W                 | FAR3          |
| YER144C                                          | UBP5          | YOR066W                 | MSA1          |
| YDR477W                                          | SNF1          | YLR093C                 | NYV1          |
| YFR010W                                          | UBP6          | YMR230W                 | RPS10B        |
| YMR224C                                          | MRE11         | YDR137W                 | RGP1          |
| YNL248C                                          | RPA49         | YGL252C                 | RTG2          |
| YDL160C                                          | DHH1          | YMR224C                 | MRE11         |
| YMR224C                                          | MRE11         | YPL161C                 | BEM4          |
| YOL067C                                          | RTG1          | YHR114W                 | BZZ1          |
| YDR195W                                          | REF2          | YOR179C                 | SYC1          |
| YNR023W                                          | SNF12         | YPL240C                 | HSP82         |
| YER139C                                          | YER139C       | YDR310C                 | SUM1          |
| YIL148W                                          | RPL40A        | YGR059W                 | SPR3          |
| YNL297C                                          | MON2          | YJR084W                 | CSN12         |
| YKL139W                                          | CTK1          | YAR014C                 | BUD14         |
| YDR129C                                          | SAC6          | YPL161C                 | BEM4          |
| YBL058W                                          | SHP1          | YNL076W                 | MKS1          |
| YIL008W                                          | URM1          | YBL087C                 | RPL23A        |
| YMR179W                                          | SPT21         | YDR254W                 | CHL4          |
| YLR234W                                          | TOP3          | YLR032W                 | RAD5          |
| YNL032W                                          | SIW14         | YML071C                 | COG8          |

| Predictions at threshold level 0.80 continued... |               |                         |               |
|--------------------------------------------------|---------------|-------------------------|---------------|
| Gene1 of predicted pair                          |               | Gene2 of predicted pair |               |
| Systematic Name                                  | Standard Name | Systematic Name         | Standard Name |
| YOL090W                                          | MSH2          | YGR258C                 | RAD2          |
| YOR106W                                          | VAM3          | YMR216C                 | SKY1          |
| YDL020C                                          | RPN4          | YGR108W                 | CLB1          |
| YDR156W                                          | RPA14         | YFR032C-A               | RPL29         |
| YHR200W                                          | RPN10         | YGR232W                 | NAS6          |
| YKL010C                                          | UFD4          | YJL176C                 | SWI3          |
| YOR112W                                          | CEX1          | YAL002W                 | VPS8          |
| YHL031C                                          | GOS1          | YNL199C                 | GCR2          |
| YPL115C                                          | BEM3          | YHR111W                 | UBA4          |
| YHR111W                                          | UBA4          | YPR120C                 | CLB5          |
| YOR308C                                          | SNU66         | YNL107W                 | YAF9          |
| YBR274W                                          | CHK1          | YOR043W                 | WHI2          |
| YMR139W                                          | RIM11         | YMR042W                 | ARG80         |
| YOR358W                                          | HAP5          | YGL016W                 | KAP122        |
| YPL213W                                          | LEA1          | YNL079C                 | TPM1          |
| YJL036W                                          | SNX4          | YGR105W                 | VMA21         |
| YER139C                                          | YER139C       | YDR207C                 | UME6          |
| YMR284W                                          | YKU70         | YDR227W                 | SIR4          |
| YLR381W                                          | CTF3          | YPL161C                 | BEM4          |
| YOL148C                                          | SPT20         | YDR216W                 | ADR1          |
| YPR120C                                          | CLB5          | YNL225C                 | CNM67         |
| YNR023W                                          | SNF12         | YGL025C                 | PGD1          |
| YDR174W                                          | HMO1          | YML016C                 | PPZ1          |
| YDR146C                                          | SWI5          | YMR055C                 | BUB2          |
| YPR017C                                          | DSS4          | YCR066W                 | RAD18         |
| YKR099W                                          | BAS1          | YGL115W                 | SNF4          |
| YNL069C                                          | RPL16B        | YHL020C                 | OPI1          |
| YEL065W                                          | SIT1          | YFR010W                 | UBP6          |
| YGR129W                                          | SYF2          | YPR101W                 | SNT309        |

| Predictions at threshold level 0.80 continued... |               |                         |               |
|--------------------------------------------------|---------------|-------------------------|---------------|
| Gene1 of predicted pair                          |               | Gene2 of predicted pair |               |
| Systematic Name                                  | Standard Name | Systematic Name         | Standard Name |
| YPL057C                                          | SUR1          | YER044C                 | ERG28         |
| YAL024C                                          | LTE1          | YOL081W                 | IRA2          |
| YJL183W                                          | MNN11         | YEL060C                 | PRB1          |
| YDR261C                                          | EXG2          | YDL077C                 | VAM6          |
| YMR039C                                          | SUB1          | YDR310C                 | SUM1          |
| YOR112W                                          | CEX1          | YNL238W                 | KEX2          |
| YDL020C                                          | RPN4          | YEL053C                 | MAK10         |
| YKL126W                                          | YPK1          | YOL081W                 | IRA2          |
| YKR099W                                          | BAS1          | YEL053C                 | MAK10         |
| YDR108W                                          | GSG1          | YDR137W                 | RGP1          |
| YDL161W                                          | ENT1          | YMR231W                 | PEP5          |
| YGR249W                                          | MGA1          | YHR156C                 | LIN1          |
| YJL058C                                          | BIT61         | YJR135C                 | MCM22         |
| YGR249W                                          | MGA1          | YLR370C                 | ARC18         |
| YLR119W                                          | SRN2          | YLR452C                 | SST2          |
| YLR090W                                          | XDJ1          | YNL238W                 | KEX2          |
| YPR018W                                          | RLF2          | YPR120C                 | CLB5          |
| YFR010W                                          | UBP6          | YMR055C                 | BUB2          |
| YMR199W                                          | CLN1          | YER049W                 | TPA1          |
| YOR069W                                          | VPS5          | YHR060W                 | VMA22         |
| YGL175C                                          | SAE2          | YLR352W                 | YLR352W       |
| YML117W                                          | NAB6          | YOR275C                 | RIM20         |
| YNL218W                                          | MGS1          | YHR134W                 | WSS1          |
| YBL051C                                          | PIN4          | YNL116W                 | DMA2          |
| YDR320C                                          | SWA2          | YGL212W                 | VAM7          |
| YDR176W                                          | NGG1          | YNL107W                 | YAF9          |
| YLR410W                                          | VIP1          | YDR289C                 | RTT103        |
| YJR135C                                          | MCM22         | YHL002W                 | HSE1          |
| YNL201C                                          | PSY2          | YFR036W                 | CDC26         |

| Predictions at threshold level 0.80 continued... |               |                         |               |
|--------------------------------------------------|---------------|-------------------------|---------------|
| Gene1 of predicted pair                          |               | Gene2 of predicted pair |               |
| Systematic Name                                  | Standard Name | Systematic Name         | Standard Name |
| YGR270W                                          | YTA7          | YPR120C                 | CLB5          |
| YMR092C                                          | AIP1          | YDR129C                 | SAC6          |
| YCL037C                                          | SRO9          | YCR066W                 | RAD18         |
| YDR477W                                          | SNF1          | YNR072W                 | HXT17         |
| YGL025C                                          | PGD1          | YLR370C                 | ARC18         |
| YNL025C                                          | SSN8          | YCR081W                 | SRB8          |
| YDR318W                                          | MCM21         | YDR289C                 | RTT103        |
| YBL058W                                          | SHP1          | YLR370C                 | ARC18         |
| YLR135W                                          | SLX4          | YOR080W                 | DIA2          |
| YJL004C                                          | SYS1          | YNL107W                 | YAF9          |
| YGL133W                                          | ITC1          | YDR507C                 | GIN4          |
| YDR108W                                          | GSG1          | YHR060W                 | VMA22         |
| YIL159W                                          | BNR1          | YJL172W                 | CPS1          |
| YDL013W                                          | SLX5          | YCR086W                 | CSM1          |
| YKR099W                                          | BAS1          | YBR280C                 | SAF1          |
| YJL060W                                          | BNA3          | YBR215W                 | HPC2          |
| YGR054W                                          | YGR054W       | YJR090C                 | GRR1          |
| YOL018C                                          | TLG2          | YDR153C                 | ENT5          |
| YPR084W                                          | YPR084W       | YGL212W                 | VAM7          |
| YBR171W                                          | SEC66         | YBL025W                 | RRN10         |
| YLR234W                                          | TOP3          | YNL117W                 | MLS1          |
| YJL124C                                          | LSM1          | YML112W                 | CTK3          |
| YLL007C                                          | YLL007C       | YJR135C                 | MCM22         |
| YHR060W                                          | VMA22         | YBL025W                 | RRN10         |
| YBR171W                                          | SEC66         | YEL036C                 | ANP1          |
| YGL115W                                          | SNF4          | YBR280C                 | SAF1          |
| YLR292C                                          | SEC72         | YEL053C                 | MAK10         |
| YGL060W                                          | YBP2          | YBR107C                 | IML3          |
| YLR381W                                          | CTF3          | YLR032W                 | RAD5          |

| Predictions at threshold level 0.80 continued... |               |                         |               |
|--------------------------------------------------|---------------|-------------------------|---------------|
| Gene1 of predicted pair                          |               | Gene2 of predicted pair |               |
| Systematic Name                                  | Standard Name | Systematic Name         | Standard Name |
| YKR014C                                          | YPT52         | YOR035C                 | SHE4          |
| YPL256C                                          | CLN2          | YHR115C                 | DMA1          |
| YLR386W                                          | VAC14         | YPL161C                 | BEM4          |
| YML115C                                          | VAN1          | YJR084W                 | CSN12         |
| YNL016W                                          | PUB1          | YJR035W                 | RAD26         |
| YGL147C                                          | RPL9A         | YER116C                 | SLX8          |
| YKL213C                                          | DOA1          | YMR038C                 | CCS1          |
| YOR132W                                          | VPS17         | YNR032W                 | PPG1          |
| YIR005W                                          | IST3          | YFR036W                 | CDC26         |
| YPR040W                                          | TIP41         | YPL152W                 | RRD2          |
| YNL215W                                          | IES2          | YHR039C-A               | VMA10         |
| YLR399C                                          | BDF1          | YKL110C                 | KTI12         |
| YMR080C                                          | NAM7          | YOR076C                 | SKI7          |
| YOR127W                                          | RGA1          | YOR275C                 | RIM20         |
| YDL047W                                          | SIT4          | YKR030W                 | GMH1          |
| YHR013C                                          | ARD1          | YMR038C                 | CCS1          |
| YBL079W                                          | NUP170        | YML057W                 | CMP2          |
| YDR383C                                          | NKP1          | YLR254C                 | NDL1          |
| YIL076W                                          | SEC28         | YNL307C                 | MCK1          |
| YDL083C                                          | RPS16B        | YDL077C                 | VAM6          |
| YKR099W                                          | BAS1          | YBR036C                 | CSG2          |
| YGL226C-A                                        | OST5          | YEL036C                 | ANP1          |
| YDR260C                                          | SWM1          | YPL152W                 | RRD2          |
| YDR443C                                          | SSN2          | YOR270C                 | VPH1          |
| YAL024C                                          | LTE1          | YMR039C                 | SUB1          |
| YGL025C                                          | PGD1          | YNL079C                 | TPM1          |
| YLL007C                                          | YLL007C       | YGL124C                 | MON1          |
| YJR024C                                          | MDE1          | YGL016W                 | KAP122        |
| YBR126C                                          | TPS1          | YOR035C                 | SHE4          |

| Predictions at threshold level 0.80 continued... |               |                         |               |
|--------------------------------------------------|---------------|-------------------------|---------------|
| Gene1 of predicted pair                          |               | Gene2 of predicted pair |               |
| Systematic Name                                  | Standard Name | Systematic Name         | Standard Name |
| YGR104C                                          | SRB5          | YDR378C                 | LSM6          |
| YDL116W                                          | NUP84         | YHR013C                 | ARD1          |
| YLR381W                                          | CTF3          | YDR363W-A               | SEM1          |
| YGL147C                                          | RPL9A         | YOR270C                 | VPH1          |
| YEL053C                                          | MAK10         | YLR370C                 | ARC18         |
| YKR072C                                          | SIS2          | YGL031C                 | RPL24A        |
| YDR254W                                          | CHL4          | YPL152W                 | RRD2          |
| YLR095C                                          | IOC2          | YHR060W                 | VMA22         |
| YMR172W                                          | HOT1          | YCR086W                 | CSM1          |
| YHR205W                                          | SCH9          | YER096W                 | SHC1          |
| YHR157W                                          | REC104        | YMR133W                 | REC114        |
| YDR174W                                          | HMO1          | YOL054W                 | PSH1          |
| YOR312C                                          | RPL20B        | YKL041W                 | VPS24         |
| YNL264C                                          | PDR17         | YJR035W                 | RAD26         |
| YHR134W                                          | WSS1          | YDR254W                 | CHL4          |
| YMR055C                                          | BUB2          | YDL006W                 | PTC1          |
| YJL154C                                          | VPS35         | YKL119C                 | VPH2          |
| YDR293C                                          | SSD1          | YLR360W                 | VPS38         |
| YNL215W                                          | IES2          | YDL002C                 | NHP10         |
| YOR109W                                          | INP53         | YJR058C                 | APS2          |
| YER110C                                          | KAP123        | YKR024C                 | DBP7          |
| YML016C                                          | PPZ1          | YDR200C                 | VPS64         |
| YPR131C                                          | NAT3          | YLR018C                 | POM34         |
| YDR507C                                          | GIN4          | YCL024W                 | KCC4          |
| YKL048C                                          | ELM1          | YGL124C                 | MON1          |
| YOR337W                                          | TEA1          | YNL058C                 | YNL058C       |
| YOR141C                                          | ARP8          | YOL081W                 | IRA2          |
| YOR368W                                          | RAD17         | YGR188C                 | BUB1          |
| YHR013C                                          | ARD1          | YJL006C                 | CTK2          |



| Predictions at threshold level 0.80 continued... |               |                         |               |
|--------------------------------------------------|---------------|-------------------------|---------------|
| Gene1 of predicted pair                          |               | Gene2 of predicted pair |               |
| Systematic Name                                  | Standard Name | Systematic Name         | Standard Name |
| YPL022W                                          | RAD1          | YDR207C                 | UME6          |
| YPL046C                                          | ELC1          | YGL208W                 | SIP2          |
| YGR249W                                          | MGA1          | YNL041C                 | COG6          |
| YOR109W                                          | INP53         | YER120W                 | SCS2          |
| YLR192C                                          | HCR1          | YBR171W                 | SEC66         |
| YJL151C                                          | SNA3          | YLR144C                 | ACF2          |
| YER179W                                          | DMC1          | YLR219W                 | MSC3          |
| YPR120C                                          | CLB5          | YDR207C                 | UME6          |
| YLR206W                                          | ENT2          | YNR006W                 | VPS27         |
| YMR311C                                          | GLC8          | YEL060C                 | PRB1          |
| YLR094C                                          | GIS3          | YMR311C                 | GLC8          |
| YBL051C                                          | PIN4          | YNL107W                 | YAF9          |
| YHR178W                                          | STB5          | YBR215W                 | HPC2          |
| YJR040W                                          | GEF1          | YPR032W                 | SRO7          |
| YDL192W                                          | ARF1          | YBR280C                 | SAF1          |
| YBR057C                                          | MUM2          | YMR116C                 | ASC1          |
| YLR240W                                          | VPS34         | YGL095C                 | VPS45         |
| YGL163C                                          | RAD54         | YLR370C                 | ARC18         |
| YPL024W                                          | RMI1          | YMR038C                 | CCS1          |
| YNL069C                                          | RPL16B        | YER122C                 | GLO3          |
| YPR036W                                          | VMA13         | YOR066W                 | MSA1          |
| YKR048C                                          | NAP1          | YJL187C                 | SWE1          |
| YLR093C                                          | NYV1          | YEL060C                 | PRB1          |
| YPR018W                                          | RLF2          | YPL256C                 | CLN2          |
| YDR245W                                          | MNN10         | YDR137W                 | RGP1          |
| YKL116C                                          | PRR1          | YDR207C                 | UME6          |
| YHR178W                                          | STB5          | YCR077C                 | PAT1          |
| YGL147C                                          | RPL9A         | YMR214W                 | SCJ1          |
| YHR108W                                          | GGA2          | YDR153C                 | ENT5          |

| Predictions at threshold level 0.80 continued... |               |                         |               |
|--------------------------------------------------|---------------|-------------------------|---------------|
| Gene1 of predicted pair                          |               | Gene2 of predicted pair |               |
| Systematic Name                                  | Standard Name | Systematic Name         | Standard Name |
| YJR084W                                          | CSN12         | YLR180W                 | SAM1          |
| YHL006C                                          | SHU1          | YDR078C                 | SHU2          |
| YGL212W                                          | VAM7          | YEL036C                 | ANP1          |
| YMR116C                                          | ASC1          | YDR440W                 | DOT1          |
| YLR292C                                          | SEC72         | YGR108W                 | CLB1          |
| YLR079W                                          | SIC1          | YMR125W                 | STO1          |
| YNL248C                                          | RPA49         | YHR013C                 | ARD1          |
| YLR090W                                          | XDJ1          | YLR180W                 | SAM1          |
| YDR309C                                          | GIC2          | YPL256C                 | CLN2          |
| YGL163C                                          | RAD54         | YKL114C                 | APN1          |
| YMR125W                                          | STO1          | YKL068W                 | NUP100        |
| YPR084W                                          | YPR084W       | YEL043W                 | YEL043W       |
| YDR293C                                          | SSD1          | YMR216C                 | SKY1          |
| YLR234W                                          | TOP3          | YPR046W                 | MCM16         |
| YDR137W                                          | RGP1          | YJL095W                 | BCK1          |
| YBR217W                                          | ATG12         | YOR035C                 | SHE4          |
| YDL080C                                          | THI3          | YML097C                 | VPS9          |
| YLR006C                                          | SSK1          | YIL034C                 | CAP2          |
| YBR278W                                          | DPB3          | YDL002C                 | NHP10         |
| YLR292C                                          | SEC72         | YGL237C                 | HAP2          |
| YGR014W                                          | MSB2          | YDL006W                 | PTC1          |
| YDR004W                                          | RAD57         | YBR215W                 | HPC2          |
| YJL124C                                          | LSM1          | YPL152W                 | RRD2          |
| YFR040W                                          | SAP155        | YJR032W                 | CPR7          |
| YOR124C                                          | UBP2          | YLR350W                 | ORM2          |
| YLR384C                                          | IKI3          | YHR187W                 | IKI1          |
| YML115C                                          | VAN1          | YMR133W                 | REC114        |
| YDR293C                                          | SSD1          | YOR069W                 | VPS5          |
| YDR293C                                          | SSD1          | YDR309C                 | GIC2          |

| Predictions at threshold level 0.80 continued... |               |                         |               |
|--------------------------------------------------|---------------|-------------------------|---------------|
| Gene1 of predicted pair                          |               | Gene2 of predicted pair |               |
| Systematic Name                                  | Standard Name | Systematic Name         | Standard Name |
| YFR010W                                          | UBP6          | YGR135W                 | PRE9          |
| YKL116C                                          | PRR1          | YBR019C                 | GAL10         |
| YPL253C                                          | VIK1          | YPR046W                 | MCM16         |
| YOR127W                                          | RGA1          | YHL031C                 | GOS1          |
| YBR030W                                          | YBR030W       | YLR386W                 | VAC14         |
| YKR099W                                          | BAS1          | YDR310C                 | SUM1          |
| YGL147C                                          | RPL9A         | YDL184C                 | RPL41A        |
| YOL051W                                          | GAL11         | YLR399C                 | BDF1          |
| YPL152W                                          | RRD2          | YIL103W                 | DPH1          |
| YOR109W                                          | INP53         | YOL018C                 | TLG2          |
| YML115C                                          | VAN1          | YCR053W                 | THR4          |
| YDL154W                                          | MSH5          | YGL249W                 | ZIP2          |
| YFL033C                                          | RIM15         | YDR310C                 | SUM1          |
| YLR079W                                          | SIC1          | YER110C                 | KAP123        |
| YOR195W                                          | SLK19         | YKL101W                 | HSL1          |
| YPL042C                                          | SSN3          | YHR115C                 | DMA1          |
| YGR159C                                          | NSR1          | YDR440W                 | DOT1          |
| YLR360W                                          | VPS38         | YMR054W                 | STV1          |
| YDL223C                                          | HBT1          | YJR032W                 | CPR7          |
| YPL115C                                          | BEM3          | YJL183W                 | MNN11         |
| YNL069C                                          | RPL16B        | YDR310C                 | SUM1          |
| YDR245W                                          | MNN10         | YHR012W                 | VPS29         |
| YDR080W                                          | VPS41         | YNL297C                 | MON2          |
| YIL034C                                          | CAP2          | YBR200W                 | BEM1          |
| YEL065W                                          | SIT1          | YER040W                 | GLN3          |
| YLR360W                                          | VPS38         | YBR127C                 | VMA2          |
| YML095C                                          | RAD10         | YDL059C                 | RAD59         |
| YMR153W                                          | NUP53         | YCR053W                 | THR4          |
| YKR020W                                          | VPS51         | YEL043W                 | YEL043W       |

| Predictions at threshold level 0.80 continued... |               |                         |               |
|--------------------------------------------------|---------------|-------------------------|---------------|
| Gene1 of predicted pair                          |               | Gene2 of predicted pair |               |
| Systematic Name                                  | Standard Name | Systematic Name         | Standard Name |
| YHR013C                                          | ARD1          | YNL107W                 | YAF9          |
| YBL103C                                          | RTG3          | YPR119W                 | CLB2          |
| YNL025C                                          | SSN8          | YCL037C                 | SRO9          |
| YLR337C                                          | VRP1          | YML071C                 | COG8          |
| YPL106C                                          | SSE1          | YLR370C                 | ARC18         |
| YNL307C                                          | MCK1          | YGL100W                 | SEH1          |
| YKL048C                                          | ELM1          | YJL006C                 | CTK2          |
| YHL031C                                          | GOS1          | YDR378C                 | LSM6          |
| YJL095W                                          | BCK1          | YBL072C                 | RPS8A         |
| YNL291C                                          | MID1          | YHL031C                 | GOS1          |
| YLR102C                                          | APC9          | YKL032C                 | IXR1          |
| YJR056C                                          | YJR056C       | YDR310C                 | SUM1          |
| YMR201C                                          | RAD14         | YGR258C                 | RAD2          |
| YPL024W                                          | RMI1          | YJR140C                 | HIR3          |
| YPL129W                                          | TAF14         | YBR111W-A               | SUS1          |
| YEL065W                                          | SIT1          | YOR327C                 | SNC2          |
| YLR288C                                          | MEC3          | YER032W                 | FIR1          |
| YMR224C                                          | MRE11         | YKL006W                 | RPL14A        |
| YKL126W                                          | YPK1          | YDR358W                 | GGA1          |
| YDR440W                                          | DOT1          | YHL002W                 | HSE1          |
| YEL043W                                          | YEL043W       | YER120W                 | SCS2          |
| YBR107C                                          | IML3          | YLR452C                 | SST2          |
| YML016C                                          | PPZ1          | YDR318W                 | MCM21         |
| YHR060W                                          | VMA22         | YOL081W                 | IRA2          |
| YOR358W                                          | HAP5          | YHR111W                 | UBA4          |
| YDR129C                                          | SAC6          | YKL041W                 | VPS24         |
| YDR379W                                          | RGA2          | YDL047W                 | SIT4          |
| YMR026C                                          | PEX12         | YHR039C-A               | VMA10         |
| YLR148W                                          | PEP3          | YGL198W                 | YIP4          |

| Predictions at threshold level 0.80 continued... |               |                         |               |
|--------------------------------------------------|---------------|-------------------------|---------------|
| Gene1 of predicted pair                          |               | Gene2 of predicted pair |               |
| Systematic Name                                  | Standard Name | Systematic Name         | Standard Name |
| YDR507C                                          | GIN4          | YJL136C                 | RPS21B        |
| YIR005W                                          | IST3          | YOR038C                 | HIR2          |
| YOR132W                                          | VPS17         | YDL006W                 | PTC1          |
| YDR076W                                          | RAD55         | YLR352W                 | YLR352W       |
| YOR127W                                          | RGA1          | YBR108W                 | YBR108W       |
| YIL036W                                          | CST6          | YML112W                 | CTK3          |
| YJR040W                                          | GEF1          | YGR105W                 | VMA21         |
| YOL054W                                          | PSH1          | YGL252C                 | RTG2          |
| YJL176C                                          | SWI3          | YOR035C                 | SHE4          |
| YOR132W                                          | VPS17         | YDR289C                 | RTT103        |
| YLR216C                                          | CPR6          | YNL135C                 | FPR1          |
| YOR033C                                          | EXO1          | YPR120C                 | CLB5          |
| YLR309C                                          | IMH1          | YDR153C                 | ENT5          |
| YDR225W                                          | HTA1          | YMR055C                 | BUB2          |
| YGL190C                                          | CDC55         | YPR135W                 | CTF4          |
| YBR200W                                          | BEM1          | YHR060W                 | VMA22         |
| YOR059C                                          | YOR059C       | YMR313C                 | TGL3          |
| YNL201C                                          | PSY2          | YIL103W                 | DPH1          |
| YCR081W                                          | SRB8          | YLR079W                 | SIC1          |
| YOR290C                                          | SNF2          | YMR152W                 | YIM1          |
| YKR020W                                          | VPS51         | YHL020C                 | OPI1          |
| YMR152W                                          | YIM1          | YMR230W                 | RPS10B        |
| YCR066W                                          | RAD18         | YPL234C                 | TFP3          |
| YPR084W                                          | YPR084W       | YOL018C                 | TLG2          |
| YLR320W                                          | MMS22         | YMR230W                 | RPS10B        |
| YMR133W                                          | REC114        | YMR152W                 | YIM1          |
| YOR270C                                          | VPH1          | YNR072W                 | HXT17         |
| YKR020W                                          | VPS51         | YEL053C                 | MAK10         |
| YMR109W                                          | MYO5          | YGR054W                 | YGR054W       |

| Predictions at threshold level 0.80 continued... |               |                         |               |
|--------------------------------------------------|---------------|-------------------------|---------------|
| Gene1 of predicted pair                          |               | Gene2 of predicted pair |               |
| Systematic Name                                  | Standard Name | Systematic Name         | Standard Name |
| YOR195W                                          | SLK19         | YPL152W                 | RRD2          |
| YDL184C                                          | RPL41A        | YKL126W                 | YPK1          |
| YNL236W                                          | SIN4          | YHR108W                 | GGA2          |
| YHR134W                                          | WSS1          | YJL187C                 | SWE1          |
| YHR178W                                          | STB5          | YGL148W                 | ARO2          |
| YOR043W                                          | WHI2          | YNL041C                 | COG6          |
| YDR245W                                          | MNN10         | YJR035W                 | RAD26         |
| YOR001W                                          | RRP6          | YHL031C                 | GOS1          |
| YKL139W                                          | CTK1          | YLR410W                 | VIP1          |
| YGL208W                                          | SIP2          | YPL256C                 | CLN2          |
| YOR270C                                          | VPH1          | YPR030W                 | CSR2          |
| YBR107C                                          | IML3          | YDL226C                 | GCS1          |
| YBL008W                                          | HIR1          | YGL115W                 | SNF4          |
| YLR234W                                          | TOP3          | YBL079W                 | NUP170        |
| YNR072W                                          | HXT17         | YOL121C                 | RPS19A        |
| YOR080W                                          | DIA2          | YER122C                 | GLO3          |
| YJL172W                                          | CPS1          | YHR081W                 | LRP1          |
| YFR008W                                          | FAR7          | YMR029C                 | FAR8          |
| YMR039C                                          | SUB1          | YDL002C                 | NHP10         |
| YKR001C                                          | VPS1          | YEL053C                 | MAK10         |
| YBL087C                                          | RPL23A        | YGL031C                 | RPL24A        |
| YNL054W                                          | VAC7          | YGL252C                 | RTG2          |
| YIR005W                                          | IST3          | YLR182W                 | SWI6          |
| YLR083C                                          | EMP70         | YNR032W                 | PPG1          |
| YEL044W                                          | IES6          | YDR245W                 | MNN10         |
| YGL078C                                          | DBP3          | YBR171W                 | SEC66         |
| YDR443C                                          | SSN2          | YNL288W                 | CAF40         |
| YBR084C-A                                        | RPL19A        | YHR200W                 | RPN10         |
| YGR019W                                          | UGA1          | YLR360W                 | VPS38         |

| Predictions at threshold level 0.80 continued... |               |                         |               |
|--------------------------------------------------|---------------|-------------------------|---------------|
| Gene1 of predicted pair                          |               | Gene2 of predicted pair |               |
| Systematic Name                                  | Standard Name | Systematic Name         | Standard Name |
| YFR031C-A                                        | RPL2A         | YOR035C                 | SHE4          |
| YJL183W                                          | MNN11         | YCR053W                 | THR4          |
| YNL264C                                          | PDR17         | YJL183W                 | MNN11         |
| YNL025C                                          | SSN8          | YDR137W                 | RGP1          |
| YBR107C                                          | IML3          | YMR055C                 | BUB2          |
| YLR410W                                          | VIP1          | YJL006C                 | CTK2          |
| YAL020C                                          | ATS1          | YBR200W                 | BEM1          |
| YJR140C                                          | HIR3          | YOR124C                 | UBP2          |
| YBR019C                                          | GAL10         | YGL124C                 | MON1          |
| YDR245W                                          | MNN10         | YJL187C                 | SWE1          |
| YBR173C                                          | UMP1          | YGR184C                 | UBR1          |
| YNL079C                                          | TPM1          | YHR158C                 | KEL1          |
| YGL178W                                          | MPT5          | YMR312W                 | ELP6          |
| YMR133W                                          | REC114        | YBR036C                 | CSG2          |
| YDL101C                                          | DUN1          | YHR134W                 | WSS1          |
| YKL117W                                          | SBA1          | YKR024C                 | DBP7          |
| YIL053W                                          | RHR2          | YDL184C                 | RPL41A        |
| YDR108W                                          | GSG1          | YNL044W                 | YIP3          |
| YPL161C                                          | BEM4          | YNL076W                 | MKS1          |
| YMR142C                                          | RPL13B        | YBR171W                 | SEC66         |
| YDR358W                                          | GGA1          | YER040W                 | GLN3          |
| YMR179W                                          | SPT21         | YKL101W                 | HSL1          |
| YLR018C                                          | POM34         | YOR358W                 | HAP5          |
| YDL184C                                          | RPL41A        | YBR280C                 | SAF1          |
| YNL243W                                          | SLA2          | YPR135W                 | CTF4          |
| YDR293C                                          | SSD1          | YPR051W                 | MAK3          |
| YOR231W                                          | MKK1          | YDL006W                 | PTC1          |
| YML115C                                          | VAN1          | YDR456W                 | NHX1          |
| YMR038C                                          | CCS1          | YDR207C                 | UME6          |

| Predictions at threshold level 0.80 continued... |               |                         |               |
|--------------------------------------------------|---------------|-------------------------|---------------|
| Gene1 of predicted pair                          |               | Gene2 of predicted pair |               |
| Systematic Name                                  | Standard Name | Systematic Name         | Standard Name |
| YLR360W                                          | VPS38         | YGR020C                 | VMA7          |
| YPL037C                                          | EGD1          | YML001W                 | YPT7          |
| YOR312C                                          | RPL20B        | YJR035W                 | RAD26         |
| YER044C                                          | ERG28         | YOR066W                 | MSA1          |
| YPL137C                                          | GIP3          | YJR032W                 | CPR7          |
| YBR280C                                          | SAF1          | YOL081W                 | IRA2          |
| YMR198W                                          | CIK1          | YLR386W                 | VAC14         |
| YMR198W                                          | CIK1          | YKL032C                 | IXR1          |
| YOR106W                                          | VAM3          | YDL192W                 | ARF1          |
| YPR017C                                          | DSS4          | YOL112W                 | MSB4          |
| YJL095W                                          | BCK1          | YER040W                 | GLN3          |
| YBR082C                                          | UBC4          | YDR207C                 | UME6          |
| YJL029C                                          | VPS53         | YJL164C                 | TPK1          |
| YEL065W                                          | SIT1          | YDR207C                 | UME6          |
| YJR032W                                          | CPR7          | YEL042W                 | GDA1          |
| YLR447C                                          | VMA6          | YOL018C                 | TLG2          |
| YMR038C                                          | CCS1          | YLR032W                 | RAD5          |
| YPL024W                                          | RMI1          | YMR133W                 | REC114        |
| YHR111W                                          | UBA4          | YDR309C                 | GIC2          |
| YML115C                                          | VAN1          | YBL103C                 | RTG3          |
| YBR107C                                          | IML3          | YJR060W                 | CBF1          |
| YBR127C                                          | VMA2          | YGR105W                 | VMA21         |
| YLR288C                                          | MEC3          | YMR038C                 | CCS1          |
| YPR084W                                          | YPR084W       | YDR363W-A               | SEM1          |
| YHR111W                                          | UBA4          | YKL101W                 | HSL1          |
| YLL007C                                          | YLL007C       | YBR171W                 | SEC66         |
| YIL008W                                          | URM1          | YGR188C                 | BUB1          |
| YPR046W                                          | MCM16         | YGL124C                 | MON1          |
| YML103C                                          | NUP188        | YGL252C                 | RTG2          |



| Predictions at threshold level 0.80 continued... |               |                         |               |
|--------------------------------------------------|---------------|-------------------------|---------------|
| Gene1 of predicted pair                          |               | Gene2 of predicted pair |               |
| Systematic Name                                  | Standard Name | Systematic Name         | Standard Name |
| YDR103W                                          | STE5          | YLR362W                 | STE11         |
| YMR192W                                          | GYL1          | YPL249C                 | GYP5          |
| YMR172W                                          | HOT1          | YOR023C                 | AHC1          |
| YGR105W                                          | VMA21         | YNL107W                 | YAF9          |
| YKL126W                                          | YPK1          | YML071C                 | COG8          |
| YFR010W                                          | UBP6          | YGL100W                 | SEH1          |
| YPL018W                                          | CTF19         | YBR114W                 | RAD16         |
| YLR447C                                          | VMA6          | YER122C                 | GLO3          |
| YJL058C                                          | BIT61         | YPR046W                 | MCM16         |
| YDR507C                                          | GIN4          | YHR111W                 | UBA4          |
| YMR116C                                          | ASC1          | YJL006C                 | CTK2          |
| YBR200W                                          | BEM1          | YLR447C                 | VMA6          |
| YFR010W                                          | UBP6          | YNL325C                 | FIG4          |
| YDR507C                                          | GIN4          | YCL032W                 | STE50         |
| YML016C                                          | PPZ1          | YPL253C                 | VIK1          |
| YHR081W                                          | LRP1          | YOL081W                 | IRA2          |
| YEL065W                                          | SIT1          | YLR320W                 | MMS22         |
| YDR477W                                          | SNF1          | YOR035C                 | SHE4          |
| YJR035W                                          | RAD26         | YLR182W                 | SWI6          |
| YGL178W                                          | MPT5          | YDR334W                 | SWR1          |
| YPL057C                                          | SUR1          | YER161C                 | SPT2          |
| YLR095C                                          | IOC2          | YJR056C                 | YJR056C       |
| YDL006W                                          | PTC1          | YML097C                 | VPS9          |
| YDR155C                                          | CPR1          | YLR233C                 | EST1          |
| YDR254W                                          | CHL4          | YAL002W                 | VPS8          |
| YBR010W                                          | HHT1          | YOR141C                 | ARP8          |
| YPL042C                                          | SSN3          | YMR202W                 | ERG2          |
| YFR010W                                          | UBP6          | YJR032W                 | CPR7          |
| YBL058W                                          | SHP1          | YGL212W                 | VAM7          |

| Predictions at threshold level 0.80 continued... |               |                         |               |
|--------------------------------------------------|---------------|-------------------------|---------------|
| Gene1 of predicted pair                          |               | Gene2 of predicted pair |               |
| Systematic Name                                  | Standard Name | Systematic Name         | Standard Name |
| YGL115W                                          | SNF4          | YJR060W                 | CBF1          |
| YPL024W                                          | RMI1          | YBL103C                 | RTG3          |
| YGR054W                                          | YGR054W       | YDR289C                 | RTT103        |
| YNL238W                                          | KEX2          | YBR280C                 | SAF1          |
| YHR012W                                          | VPS29         | YER049W                 | TPA1          |
| YKL116C                                          | PRR1          | YNL238W                 | KEX2          |
| YMR172W                                          | HOT1          | YMR127C                 | SAS2          |
| YGL190C                                          | CDC55         | YKL113C                 | RAD27         |
| YDR335W                                          | MSN5          | YGR270W                 | YTA7          |
| YAL024C                                          | LTE1          | YBR195C                 | MSI1          |
| YLR386W                                          | VAC14         | YDR469W                 | SDC1          |
| YOR132W                                          | VPS17         | YDL192W                 | ARF1          |
| YHR111W                                          | UBA4          | YLR254C                 | NDL1          |
| YER044C                                          | ERG28         | YPL161C                 | BEM4          |
| YEL050C                                          | RML2          | YPL018W                 | CTF19         |
| YPL057C                                          | SUR1          | YMR214W                 | SCJ1          |
| YML115C                                          | VAN1          | YBR036C                 | CSG2          |
| YLR234W                                          | TOP3          | YML115C                 | VAN1          |
| YER144C                                          | UBP5          | YNL307C                 | MCK1          |
| YJL172W                                          | CPS1          | YLR093C                 | NYV1          |
| YBR194W                                          | SOY1          | YJR135C                 | MCM22         |
| YML109W                                          | ZDS2          | YER124C                 | DSE1          |
| YGL163C                                          | RAD54         | YFR036W                 | CDC26         |
| YKR014C                                          | YPT52         | YBR181C                 | RPS6B         |
| YFR031C-A                                        | RPL2A         | YCL037C                 | SRO9          |
| YMR026C                                          | PEX12         | YFR036W                 | CDC26         |
| YML115C                                          | VAN1          | YKR001C                 | VPS1          |
| YMR095C                                          | SNO1          | YGL033W                 | HOP2          |
| YBL058W                                          | SHP1          | YER040W                 | GLN3          |

| Predictions at threshold level 0.80 continued... |               |                         |               |
|--------------------------------------------------|---------------|-------------------------|---------------|
| Gene1 of predicted pair                          |               | Gene2 of predicted pair |               |
| Systematic Name                                  | Standard Name | Systematic Name         | Standard Name |
| YGR249W                                          | MGA1          | YPL161C                 | BEM4          |
| YGL051W                                          | MST27         | YAR033W                 | MST28         |
| YOR132W                                          | VPS17         | YMR216C                 | SKY1          |
| YCL037C                                          | SRO9          | YOL018C                 | TLG2          |
| YLR370C                                          | ARC18         | YER122C                 | GLO3          |
| YEL009C                                          | GCN4          | YBR010W                 | HHT1          |
| YHR134W                                          | WSS1          | YGL237C                 | HAP2          |
| YHR200W                                          | RPN10         | YKR030W                 | GMH1          |
| YNL032W                                          | SIW14         | YPL161C                 | BEM4          |
| YML109W                                          | ZDS2          | YCR077C                 | PAT1          |
| YNL058C                                          | YNL058C       | YJL183W                 | MNN11         |
| YFR032C-A                                        | RPL29         | YMR205C                 | PFK2          |
| YGR252W                                          | GCN5          | YDR216W                 | ADR1          |
| YBR215W                                          | HPC2          | YGL175C                 | SAE2          |
| YGR241C                                          | YAP1802       | YNL238W                 | KEX2          |
| YLR292C                                          | SEC72         | YLR233C                 | EST1          |
| YPL129W                                          | TAF14         | YGR275W                 | RTT102        |
| YDR477W                                          | SNF1          | YNL076W                 | MKS1          |
| YJL117W                                          | PHO86         | YJL183W                 | MNN11         |
| YDL083C                                          | RPS16B        | YER040W                 | GLN3          |
| YDR379W                                          | RGA2          | YNL116W                 | DMA2          |
| YGL212W                                          | VAM7          | YDL077C                 | VAM6          |
| YNL139C                                          | RLR1          | YER063W                 | THO1          |
| YHR060W                                          | VMA22         | YGL054C                 | ERV14         |
| YOR033C                                          | EXO1          | YMR055C                 | BUB2          |
| YGL003C                                          | CDH1          | YBR019C                 | GAL10         |
| YMR152W                                          | YIM1          | YBR280C                 | SAF1          |
| YDR439W                                          | LRS4          | YGL252C                 | RTG2          |
| YBR084C-A                                        | RPL19A        | YPL256C                 | CLN2          |

| Predictions at threshold level 0.80 continued... |               |                         |               |
|--------------------------------------------------|---------------|-------------------------|---------------|
| Gene1 of predicted pair                          |               | Gene2 of predicted pair |               |
| Systematic Name                                  | Standard Name | Systematic Name         | Standard Name |
| YNL106C                                          | INP52         | YGL212W                 | VAM7          |
| YCL001W                                          | RER1          | YNL127W                 | FAR11         |
| YHR039C-A                                        | VMA10         | YNL041C                 | COG6          |
| YFL023W                                          | BUD27         | YKR035W-A               | DID2          |
| YML115C                                          | VAN1          | YNL307C                 | MCK1          |
| YMR199W                                          | CLN1          | YKL101W                 | HSL1          |
| YER001W                                          | MNN1          | YML071C                 | COG8          |
| YGR249W                                          | MGA1          | YLR398C                 | SKI2          |
| YFL033C                                          | RIM15         | YHL020C                 | OPI1          |
| YML109W                                          | ZDS2          | YOR043W                 | WHI2          |
| YPR084W                                          | YPR084W       | YAR014C                 | BUD14         |
| YBL008W                                          | HIR1          | YJL124C                 | LSM1          |
| YNR072W                                          | HXT17         | YNL076W                 | MKS1          |
| YMR198W                                          | CIK1          | YLR032W                 | RAD5          |
| YOR290C                                          | SNF2          | YPR046W                 | MCM16         |
| YDL184C                                          | RPL41A        | YER144C                 | UBP5          |
| YHR013C                                          | ARD1          | YLR032W                 | RAD5          |
| YJR058C                                          | APS2          | YOR327C                 | SNC2          |
| YMR230W                                          | RPS10B        | YOL081W                 | IRA2          |
| YGR108W                                          | CLB1          | YIL008W                 | URM1          |
| YFR040W                                          | SAP155        | YPL234C                 | TFP3          |
| YHL031C                                          | GOS1          | YMR054W                 | STV1          |
| YGR019W                                          | UGA1          | YGR054W                 | YGR054W       |
| YNL206C                                          | RTT106        | YHR115C                 | DMA1          |
| YBR107C                                          | IML3          | YJR090C                 | GRR1          |
| YPR051W                                          | MAK3          | YJR090C                 | GRR1          |
| YDR103W                                          | STE5          | YDL159W                 | STE7          |
| YLR182W                                          | SWI6          | YNL225C                 | CNM67         |
| YNR052C                                          | POP2          | YER116C                 | SLX8          |

| Predictions at threshold level 0.80 continued... |               |                         |               |
|--------------------------------------------------|---------------|-------------------------|---------------|
| Gene1 of predicted pair                          |               | Gene2 of predicted pair |               |
| Systematic Name                                  | Standard Name | Systematic Name         | Standard Name |
| YHR039C-A                                        | VMA10         | YER122C                 | GLO3          |
| YLR090W                                          | XDJ1          | YBR200W                 | BEM1          |
| YOL090W                                          | MSH2          | YJR035W                 | RAD26         |
| YIL159W                                          | BNR1          | YML115C                 | VAN1          |
| YOR069W                                          | VPS5          | YPL120W                 | VPS30         |
| YAL014C                                          | SYN8          | YHL031C                 | GOS1          |
| YKL048C                                          | ELM1          | YHR200W                 | RPN10         |
| YEL053C                                          | MAK10         | YJR135C                 | MCM22         |
| YGL212W                                          | VAM7          | YMR133W                 | REC114        |
| YJL060W                                          | BNA3          | YPR046W                 | MCM16         |
| YMR039C                                          | SUB1          | YCR077C                 | PAT1          |
| YBR171W                                          | SEC66         | YHL002W                 | HSE1          |
| YKL048C                                          | ELM1          | YJL190C                 | RPS22A        |
| YKL032C                                          | IXR1          | YBL101C                 | ECM21         |
| YMR224C                                          | MRE11         | YBR107C                 | IML3          |
| YML112W                                          | CTK3          | YNL225C                 | CNM67         |
| YKR057W                                          | RPS21A        | YNL116W                 | DMA2          |
| YKR061W                                          | KTR2          | YLR399C                 | BDF1          |
| YBR073W                                          | RDH54         | YBR107C                 | IML3          |
| YPL019C                                          | VTC3          | YOR270C                 | VPH1          |
| YOR066W                                          | MSA1          | YOR327C                 | SNC2          |
| YBR200W                                          | BEM1          | YBL025W                 | RRN10         |
| YDR004W                                          | RAD57         | YEL056W                 | HAT2          |
| YJR010C-A                                        | SPC1          | YDL006W                 | PTC1          |
| YLR083C                                          | EMP70         | YOL108C                 | INO4          |
| YHL031C                                          | GOS1          | YOL108C                 | INO4          |
| YBR133C                                          | HSL7          | YKL101W                 | HSL1          |
| YGR108W                                          | CLB1          | YGL003C                 | CDH1          |
| YCL037C                                          | SRO9          | YKL160W                 | ELF1          |

| Predictions at threshold level 0.80 continued... |               |                         |               |
|--------------------------------------------------|---------------|-------------------------|---------------|
| Gene1 of predicted pair                          |               | Gene2 of predicted pair |               |
| Systematic Name                                  | Standard Name | Systematic Name         | Standard Name |
| YIR005W                                          | IST3          | YNL225C                 | CNM67         |
| YNL106C                                          | INP52         | YPL152W                 | RRD2          |
| YJL176C                                          | SWI3          | YHL025W                 | SNF6          |
| YOR035C                                          | SHE4          | YDL192W                 | ARF1          |
| YMR055C                                          | BUB2          | YDR254W                 | CHL4          |
| YDR108W                                          | GSG1          | YDR310C                 | SUM1          |
| YPL240C                                          | HSP82         | YJR136C                 | YJR136C       |
| YDR443C                                          | SSN2          | YNL236W                 | SIN4          |
| YGR184C                                          | UBR1          | YNL230C                 | ELA1          |
| YKL213C                                          | DOA1          | YAL002W                 | VPS8          |
| YDR378C                                          | LSM6          | YBL101C                 | ECM21         |
| YDR477W                                          | SNF1          | YDR310C                 | SUM1          |
| YMR004W                                          | MVP1          | YPL120W                 | VPS30         |
| YNL094W                                          | APP1          | YOR284W                 | HUA2          |
| YPL158C                                          | YPL158C       | YOL081W                 | IRA2          |
| YDR192C                                          | NUP42         | YHR052W                 | CIC1          |
| YGR072W                                          | UPF3          | YHR039C-A               | VMA10         |
| YLR386W                                          | VAC14         | YHR152W                 | SPO12         |
| YLR315W                                          | NKP2          | YAR014C                 | BUD14         |
| YIL008W                                          | URM1          | YHR114W                 | BZZ1          |
| YNL041C                                          | COG6          | YNL051W                 | COG5          |
| YOR327C                                          | SNC2          | YDR153C                 | ENT5          |
| YHR060W                                          | VMA22         | YDR261C                 | EXG2          |
| YKL025C                                          | PAN3          | YGL087C                 | MMS2          |
| YGR268C                                          | HUA1          | YLR144C                 | ACF2          |
| YIL053W                                          | RHR2          | YER040W                 | GLN3          |
| YPR036W                                          | VMA13         | YBR019C                 | GAL10         |
| YER116C                                          | SLX8          | YGL212W                 | VAM7          |
| YER116C                                          | SLX8          | YDL083C                 | RPS16B        |

| Predictions at threshold level 0.80 continued... |               |                         |               |
|--------------------------------------------------|---------------|-------------------------|---------------|
| Gene1 of predicted pair                          |               | Gene2 of predicted pair |               |
| Systematic Name                                  | Standard Name | Systematic Name         | Standard Name |
| YPL161C                                          | BEM4          | YJR033C                 | RAV1          |
| YDR484W                                          | VPS52         | YGL003C                 | CDH1          |
| YKL126W                                          | YPK1          | YPL137C                 | GIP3          |
| YHR152W                                          | SPO12         | YKR048C                 | NAP1          |
| YCR002C                                          | CDC10         | YNL078W                 | NIS1          |
| YFL013C                                          | IES1          | YDR363W-A               | SEM1          |
| YDR358W                                          | GGA1          | YER139C                 | YER139C       |
| YPL137C                                          | GIP3          | YJL095W                 | BCK1          |
| YIL076W                                          | SEC28         | YJL095W                 | BCK1          |
| YDR293C                                          | SSD1          | YPR072W                 | NOT5          |
| YNL206C                                          | RTT106        | YML028W                 | TSA1          |
| YNL288W                                          | CAF40         | YLR381W                 | CTF3          |
| YCL067C                                          | HMLALPHA2     | YMR042W                 | ARG80         |
| YJR060W                                          | CBF1          | YHR039C-A               | VMA10         |
| YFR030W                                          | MET10         | YAR014C                 | BUD14         |
| YHR134W                                          | WSS1          | YBR171W                 | SEC66         |
| YGL115W                                          | SNF4          | YEL043W                 | YEL043W       |
| YNL032W                                          | SIW14         | YBR171W                 | SEC66         |
| YDR484W                                          | VPS52         | YEL060C                 | PRB1          |
| YOR076C                                          | SKI7          | YDR083W                 | RRP8          |
| YNL229C                                          | URE2          | YBL087C                 | RPL23A        |
| YHR060W                                          | VMA22         | YDL077C                 | VAM6          |
| YIL076W                                          | SEC28         | YKL160W                 | ELF1          |
| YDR477W                                          | SNF1          | YFR036W                 | CDC26         |
| YOL030W                                          | GAS5          | YNL016W                 | PUB1          |
| YHR200W                                          | RPN10         | YML028W                 | TSA1          |
| YNL288W                                          | CAF40         | YEL056W                 | HAT2          |
| YGL212W                                          | VAM7          | YOR036W                 | PEP12         |
| YIL036W                                          | CST6          | YGR188C                 | BUB1          |

| Predictions at threshold level 0.80 continued... |               |                         |               |
|--------------------------------------------------|---------------|-------------------------|---------------|
| Gene1 of predicted pair                          |               | Gene2 of predicted pair |               |
| Systematic Name                                  | Standard Name | Systematic Name         | Standard Name |
| YDR156W                                          | RPA14         | YML062C                 | MFT1          |
| YKL139W                                          | CTK1          | YDR183W                 | PLP1          |
| YJL058C                                          | BIT61         | YPL018W                 | CTF19         |
| YDR225W                                          | HTA1          | YBR133C                 | HSL7          |
| YJR040W                                          | GEF1          | YOL018C                 | TLG2          |
| YPR131C                                          | NAT3          | YMR231W                 | PEP5          |
| YBR200W                                          | BEM1          | YNL289W                 | PCL1          |
| YLR192C                                          | HCR1          | YER116C                 | SLX8          |
| YJR056C                                          | YJR056C       | YOR035C                 | SHE4          |
| YDL184C                                          | RPL41A        | YPL161C                 | BEM4          |
| YML115C                                          | VAN1          | YHR205W                 | SCH9          |
| YBR111W-A                                        | SUS1          | YNL031C                 | HHT2          |
| YOR270C                                          | VPH1          | YER072W                 | VTC1          |
| YIL076W                                          | SEC28         | YNL325C                 | FIG4          |
| YFR021W                                          | ATG18         | YER162C                 | RAD4          |
| YDR293C                                          | SSD1          | YJR090C                 | GRR1          |
| YNL087W                                          | TCB2          | YKR099W                 | BAS1          |
| YGR105W                                          | VMA21         | YNR032W                 | PPG1          |
| YOL111C                                          | MDY2          | YEL060C                 | PRB1          |
| YDR443C                                          | SSN2          | YDR137W                 | RGP1          |
| YDR078C                                          | SHU2          | YLR376C                 | PSY3          |
| YGL212W                                          | VAM7          | YAR014C                 | BUD14         |
| YHR156C                                          | LIN1          | YDL083C                 | RPS16B        |
| YDR477W                                          | SNF1          | YMR142C                 | RPL13B        |
| YLR119W                                          | SRN2          | YDL192W                 | ARF1          |
| YDR443C                                          | SSN2          | YGR104C                 | SRB5          |
| YPL129W                                          | TAF14         | YDR146C                 | SWI5          |
| YFR010W                                          | UBP6          | YOR080W                 | DIA2          |
| YDL020C                                          | RPN4          | YLR233C                 | EST1          |



| Predictions at threshold level 0.80 continued... |               |                         |               |
|--------------------------------------------------|---------------|-------------------------|---------------|
| Gene1 of predicted pair                          |               | Gene2 of predicted pair |               |
| Systematic Name                                  | Standard Name | Systematic Name         | Standard Name |
| YOR270C                                          | VPH1          | YDR207C                 | UME6          |
| YOR127W                                          | RGA1          | YGR270W                 | YTA7          |
| YPR036W                                          | VMA13         | YKL101W                 | HSL1          |
| YMR039C                                          | SUB1          | YJL006C                 | CTK2          |
| YDL002C                                          | NHP10         | YML097C                 | VPS9          |
| YJL172W                                          | CPS1          | YOL121C                 | RPS19A        |
| YBL103C                                          | RTG3          | YKL048C                 | ELM1          |
| YLR396C                                          | VPS33         | YOR036W                 | PEP12         |
| YOR069W                                          | VPS5          | YLR447C                 | VMA6          |
| YDR477W                                          | SNF1          | YPL253C                 | VIK1          |
| YGL115W                                          | SNF4          | YOR066W                 | MSA1          |
| YDR310C                                          | SUM1          | YOL081W                 | IRA2          |
| YDL116W                                          | NUP84         | YNL054W                 | VAC7          |
| YOR112W                                          | CEX1          | YGL212W                 | VAM7          |
| YLR410W                                          | VIP1          | YJL140W                 | RPB4          |
| YJR059W                                          | PTK2          | YNL199C                 | GCR2          |
| YBL047C                                          | EDE1          | YGL163C                 | RAD54         |
| YNL106C                                          | INP52         | YDL226C                 | GCS1          |
| YDL020C                                          | RPN4          | YGR072W                 | UPF3          |
| YLL039C                                          | UBI4          | YOR035C                 | SHE4          |
| YDL013W                                          | SLX5          | YFR036W                 | CDC26         |
| YGR270W                                          | YTA7          | YEL053C                 | MAK10         |
| YNL215W                                          | IES2          | YKL048C                 | ELM1          |
| YDL020C                                          | RPN4          | YGR188C                 | BUB1          |
| YLR095C                                          | IOC2          | YDL184C                 | RPL41A        |
| YHR098C                                          | SFB3          | YML041C                 | VPS71         |
| YKR035W-A                                        | DID2          | YCR053W                 | THR4          |
| YPR017C                                          | DSS4          | YDR080W                 | VPS41         |
| YKL110C                                          | KTI12         | YGR188C                 | BUB1          |

| Predictions at threshold level 0.80 continued... |               |                         |               |
|--------------------------------------------------|---------------|-------------------------|---------------|
| Gene1 of predicted pair                          |               | Gene2 of predicted pair |               |
| Systematic Name                                  | Standard Name | Systematic Name         | Standard Name |
| YDR484W                                          | VPS52         | YNL041C                 | COG6          |
| YBR017C                                          | KAP104        | YKL068W                 | NUP100        |
| YBR200W                                          | BEM1          | YDR507C                 | GIN4          |
| YLR234W                                          | TOP3          | YGL003C                 | CDH1          |
| YGR249W                                          | MGA1          | YOR270C                 | VPH1          |
| YER144C                                          | UBP5          | YDL083C                 | RPS16B        |
| YOL112W                                          | MSB4          | YNR049C                 | MSO1          |
| YPL129W                                          | TAF14         | YOL148C                 | SPT20         |
| YHR206W                                          | SKN7          | YER118C                 | SHO1          |
| YDR146C                                          | SWI5          | YPL161C                 | BEM4          |
| YDR225W                                          | HTA1          | YJR135C                 | MCM22         |
| YBL058W                                          | SHP1          | YOR043W                 | WHI2          |
| YPR046W                                          | MCM16         | YNL225C                 | CNM67         |
| YHL020C                                          | OPI1          | YHR012W                 | VPS29         |
| YLR090W                                          | XDJ1          | YIL159W                 | BNR1          |
| YDR076W                                          | RAD55         | YLR370C                 | ARC18         |
| YPR017C                                          | DSS4          | YDR310C                 | SUM1          |
| YGL223C                                          | COG1          | YJR035W                 | RAD26         |
| YER075C                                          | PTP3          | YOR231W                 | MKK1          |
| YLR216C                                          | CPR6          | YNL069C                 | RPL16B        |
| YPL115C                                          | BEM3          | YGR019W                 | UGA1          |
| YDR225W                                          | HTA1          | YER110C                 | KAP123        |
| YPR084W                                          | YPR084W       | YER161C                 | SPT2          |
| YLR119W                                          | SRN2          | YBR019C                 | GAL10         |
| YGR014W                                          | MSB2          | YPL180W                 | TCO89         |
| YMR004W                                          | MVP1          | YOR106W                 | VAM3          |
| YBR200W                                          | BEM1          | YLR371W                 | ROM2          |
| YML115C                                          | VAN1          | YBR082C                 | UBC4          |
| YKL116C                                          | PRR1          | YBR280C                 | SAF1          |

| Predictions at threshold level 0.80 continued... |               |                         |               |
|--------------------------------------------------|---------------|-------------------------|---------------|
| Gene1 of predicted pair                          |               | Gene2 of predicted pair |               |
| Systematic Name                                  | Standard Name | Systematic Name         | Standard Name |
| YDR202C                                          | RAV2          | YOL108C                 | INO4          |
| YER116C                                          | SLX8          | YBR171W                 | SEC66         |
| YPL024W                                          | RMI1          | YBL025W                 | RRN10         |
| YPL152W                                          | RRD2          | YNL116W                 | DMA2          |
| YIL076W                                          | SEC28         | YLR182W                 | SWI6          |
| YDR254W                                          | CHL4          | YJR032W                 | CPR7          |
| YBR030W                                          | YBR030W       | YPL195W                 | APL5          |
| YLR386W                                          | VAC14         | YBR258C                 | SHG1          |
| YLR362W                                          | STE11         | YBL075C                 | SSA3          |
| YDR156W                                          | RPA14         | YGR188C                 | BUB1          |
| YEL043W                                          | YEL043W       | YDL006W                 | PTC1          |
| YJR040W                                          | GEF1          | YKR001C                 | VPS1          |
| YBR108W                                          | YBR108W       | YNL107W                 | YAF9          |
| YOR083W                                          | WHI5          | YPL022W                 | RAD1          |
| YMR054W                                          | STV1          | YER122C                 | GLO3          |
| YJL006C                                          | CTK2          | YDR289C                 | RTT103        |
| YBR084C-A                                        | RPL19A        | YBL087C                 | RPL23A        |
| YGL147C                                          | RPL9A         | YNL041C                 | COG6          |
| YHR200W                                          | RPN10         | YHR039C-A               | VMA10         |
| YGL237C                                          | HAP2          | YMR109W                 | MYO5          |
| YOR270C                                          | VPH1          | YPR119W                 | CLB2          |
| YDR171W                                          | HSP42         | YPR046W                 | MCM16         |
| YGL147C                                          | RPL9A         | YDR207C                 | UME6          |
| YLR079W                                          | SIC1          | YDR254W                 | CHL4          |
| YEL009C                                          | GCN4          | YPR072W                 | NOT5          |
| YML001W                                          | YPT7          | YML071C                 | COG8          |
| YLR095C                                          | IOC2          | YOL121C                 | RPS19A        |
| YNL106C                                          | INP52         | YDR080W                 | VPS41         |
| YGL043W                                          | DST1          | YGL178W                 | MPT5          |

| Predictions at threshold level 0.80 continued... |               |                         |               |
|--------------------------------------------------|---------------|-------------------------|---------------|
| Gene1 of predicted pair                          |               | Gene2 of predicted pair |               |
| Systematic Name                                  | Standard Name | Systematic Name         | Standard Name |
| YOR023C                                          | AHC1          | YDR144C                 | MKC7          |
| YGR067C                                          | YGR067C       | YPL240C                 | HSP82         |
| YMR172W                                          | HOT1          | YPR046W                 | MCM16         |
| YHR108W                                          | GGA2          | YOR124C                 | UBP2          |
| YDL227C                                          | HO            | YML088W                 | UFO1          |
| YJL058C                                          | BIT61         | YDR200C                 | VPS64         |
| YPL234C                                          | TFP3          | YKL119C                 | VPH2          |
| YCR081W                                          | SRB8          | YKL139W                 | CTK1          |
| YAL014C                                          | SYN8          | YOR106W                 | VAM3          |
| YGL006W                                          | PMC1          | YLR093C                 | NYV1          |
| YOR327C                                          | SNC2          | YLR309C                 | IMH1          |
| YDR289C                                          | RTT103        | YNL225C                 | CNM67         |
| YOR327C                                          | SNC2          | YNL127W                 | FAR11         |
| YBR278W                                          | DPB3          | YJL124C                 | LSM1          |
| YNL329C                                          | PEX6          | YMR089C                 | YTA12         |
| YMR311C                                          | GLC8          | YLR398C                 | SKI2          |
| YGL078C                                          | DBP3          | YFL023W                 | BUD27         |
| YPR046W                                          | MCM16         | YLR180W                 | SAM1          |
| YDR443C                                          | SSN2          | YEL053C                 | MAK10         |
| YLR240W                                          | VPS34         | YDR129C                 | SAC6          |
| YGL178W                                          | MPT5          | YBL061C                 | SKT5          |
| YHR098C                                          | SFB3          | YBL061C                 | SKT5          |
| YCR020C-A                                        | MAK31         | YDR320C                 | SWA2          |
| YPR036W                                          | VMA13         | YFR036W                 | CDC26         |
| YOR035C                                          | SHE4          | YPR119W                 | CLB2          |
| YDR443C                                          | SSN2          | YNL238W                 | KEX2          |
| YDR156W                                          | RPA14         | YGR217W                 | CCH1          |
| YNL135C                                          | FPR1          | YGL252C                 | RTG2          |
| YIL159W                                          | BNR1          | YGL115W                 | SNF4          |

| Predictions at threshold level 0.80 continued... |               |                         |               |
|--------------------------------------------------|---------------|-------------------------|---------------|
| Gene1 of predicted pair                          |               | Gene2 of predicted pair |               |
| Systematic Name                                  | Standard Name | Systematic Name         | Standard Name |
| YLR292C                                          | SEC72         | YPL018W                 | CTF19         |
| YDR245W                                          | MNN10         | YLR425W                 | TUS1          |
| YER096W                                          | SHC1          | YJL095W                 | BCK1          |
| YDR335W                                          | MSN5          | YHR013C                 | ARD1          |
| YLR079W                                          | SIC1          | YHR205W                 | SCH9          |
| YGR275W                                          | RTT102        | YLR357W                 | RSC2          |
| YGR133W                                          | PEX4          | YBL047C                 | EDE1          |
| YLR441C                                          | RPS1A         | YOR066W                 | MSA1          |
| YER110C                                          | KAP123        | YHR114W                 | BZZ1          |
| YIL053W                                          | RHR2          | YHR081W                 | LRP1          |
| YNL291C                                          | MID1          | YER116C                 | SLX8          |
| YPL042C                                          | SSN3          | YBR194W                 | SOY1          |
| YHR039C-A                                        | VMA10         | YLR398C                 | SKI2          |
| YLR095C                                          | IOC2          | YEL060C                 | PRB1          |
| YOR023C                                          | AHC1          | YGR054W                 | YGR054W       |
| YGR239C                                          | PEX21         | YLR191W                 | PEX13         |
| YBL021C                                          | HAP3          | YKL109W                 | HAP4          |
| YBR195C                                          | MSI1          | YHR039C-A               | VMA10         |
| YDR108W                                          | GSG1          | YPL161C                 | BEM4          |
| YIL072W                                          | HOP1          | YOR351C                 | MEK1          |
| YNL325C                                          | FIG4          | YOR270C                 | VPH1          |
| YPR084W                                          | YPR084W       | YML038C                 | YMD8          |
| YPR029C                                          | APL4          | YOR036W                 | PEP12         |
| YPL129W                                          | TAF14         | YKL109W                 | HAP4          |
| YHR012W                                          | VPS29         | YJR090C                 | GRR1          |
| YJR040W                                          | GEF1          | YDR207C                 | UME6          |
| YIL036W                                          | CST6          | YJL124C                 | LSM1          |
| YCR088W                                          | ABP1          | YDR310C                 | SUM1          |
| YJL172W                                          | CPS1          | YNR072W                 | HXT17         |

| Predictions at threshold level 0.80 continued... |               |                         |               |
|--------------------------------------------------|---------------|-------------------------|---------------|
| Gene1 of predicted pair                          |               | Gene2 of predicted pair |               |
| Systematic Name                                  | Standard Name | Systematic Name         | Standard Name |
| YLR386W                                          | VAC14         | YOL121C                 | RPS19A        |
| YLR095C                                          | IOC2          | YBR019C                 | GAL10         |
| YNL106C                                          | INP52         | YJR060W                 | CBF1          |
| YER044C                                          | ERG28         | YMR133W                 | REC114        |
| YDR254W                                          | CHL4          | YPL161C                 | BEM4          |
| YPL024W                                          | RMI1          | YER122C                 | GLO3          |
| YGR249W                                          | MGA1          | YBL025W                 | RRN10         |
| YOR043W                                          | WHI2          | YOR035C                 | SHE4          |
| YLR083C                                          | EMP70         | YKR030W                 | GMH1          |
| YOR270C                                          | VPH1          | YLR180W                 | SAM1          |
| YDR507C                                          | GIN4          | YDR309C                 | GIC2          |
| YDR076W                                          | RAD55         | YPR119W                 | CLB2          |
| YPL129W                                          | TAF14         | YGR252W                 | GCN5          |
| YDR146C                                          | SWI5          | YHR205W                 | SCH9          |
| YNL288W                                          | CAF40         | YBL051C                 | PIN4          |
| YGR108W                                          | CLB1          | YDL226C                 | GCS1          |
| YKL007W                                          | CAP1          | YPR171W                 | BSP1          |
| YOR109W                                          | INP53         | YER162C                 | RAD4          |
| YER001W                                          | MNN1          | YGL223C                 | COG1          |
| YGL147C                                          | RPL9A         | YLR192C                 | HCR1          |
| YLL039C                                          | UBI4          | YPL050C                 | MNN9          |
| YBL102W                                          | SFT2          | YDR153C                 | ENT5          |
| YDR174W                                          | HMO1          | YKR061W                 | KTR2          |
| YIL053W                                          | RHR2          | YOR337W                 | TEA1          |
| YGL087C                                          | MMS2          | YPL161C                 | BEM4          |
| YGL066W                                          | SGF73         | YJL140W                 | RPB4          |
| YER087C-B                                        | SBH1          | YDL232W                 | OST4          |
| YLR386W                                          | VAC14         | YER044C                 | ERG28         |
| YDR108W                                          | GSG1          | YNL297C                 | MON2          |

| Predictions at threshold level 0.80 continued... |               |                         |               |
|--------------------------------------------------|---------------|-------------------------|---------------|
| Gene1 of predicted pair                          |               | Gene2 of predicted pair |               |
| Systematic Name                                  | Standard Name | Systematic Name         | Standard Name |
| YCR031C                                          | RPS14A        | YGR188C                 | BUB1          |
| YGR261C                                          | APL6          | YNL051W                 | COG5          |
| YDR174W                                          | HMO1          | YLR135W                 | SLX4          |
| YGL100W                                          | SEH1          | YPL240C                 | HSP82         |
| YLR148W                                          | PEP3          | YBL078C                 | ATG8          |
| YLR061W                                          | RPL22A        | YGR133W                 | PEX4          |
| YIL034C                                          | CAP2          | YJR090C                 | GRR1          |
| YGL033W                                          | HOP2          | YBR019C                 | GAL10         |
| YPR046W                                          | MCM16         | YDR358W                 | GGA1          |
| YNL238W                                          | KEX2          | YOL121C                 | RPS19A        |
| YHR098C                                          | SFB3          | YER016W                 | BIM1          |
| YDR139C                                          | RUB1          | YLR128W                 | DCN1          |
| YMR224C                                          | MRE11         | YML058W                 | SML1          |
| YDR443C                                          | SSN2          | YGL003C                 | CDH1          |
| YLR273C                                          | PIG1          | YIL045W                 | PIG2          |
| YOR001W                                          | RRP6          | YOR038C                 | HIR2          |
| YLR079W                                          | SIC1          | YBR215W                 | HPC2          |
| YEL009C                                          | GCN4          | YPL042C                 | SSN3          |
| YMR038C                                          | CCS1          | YLR350W                 | ORM2          |
| YDR144C                                          | MKC7          | YPR046W                 | MCM16         |
| YLR095C                                          | IOC2          | YLR386W                 | VAC14         |
| YPR036W                                          | VMA13         | YPL161C                 | BEM4          |
| YNL054W                                          | VAC7          | YNL107W                 | YAF9          |
| YML013W                                          | UBX2          | YPR089W                 | YPR089W       |
| YGR081C                                          | SLX9          | YMR038C                 | CCS1          |
| YGL135W                                          | RPL1B         | YMR198W                 | CIK1          |
| YEL050C                                          | RML2          | YBR200W                 | BEM1          |
| YML115C                                          | VAN1          | YMR016C                 | SOK2          |
| YPL115C                                          | BEM3          | YJL187C                 | SWE1          |

| Predictions at threshold level 0.80 continued... |               |                         |               |
|--------------------------------------------------|---------------|-------------------------|---------------|
| Gene1 of predicted pair                          |               | Gene2 of predicted pair |               |
| Systematic Name                                  | Standard Name | Systematic Name         | Standard Name |
| YNL238W                                          | KEX2          | YMR152W                 | YIM1          |
| YJL036W                                          | SNX4          | YHR039C-A               | VMA10         |
| YLR192C                                          | HCR1          | YKR014C                 | YPT52         |
| YPL057C                                          | SUR1          | YDR261C                 | EXG2          |
| YMR142C                                          | RPL13B        | YDL184C                 | RPL41A        |
| YBR215W                                          | HPC2          | YGL003C                 | CDH1          |
| YMR004W                                          | MVP1          | YNR032W                 | PPG1          |
| YLR360W                                          | VPS38         | YML115C                 | VAN1          |
| YGL147C                                          | RPL9A         | YPL195W                 | APL5          |
| YOR080W                                          | DIA2          | YLR182W                 | SWI6          |
| YPL161C                                          | BEM4          | YDR469W                 | SDC1          |
| YBR215W                                          | HPC2          | YLR370C                 | ARC18         |
| YMR153W                                          | NUP53         | YHR081W                 | LRP1          |
| YNR052C                                          | POP2          | YML016C                 | PPZ1          |
| YDL116W                                          | NUP84         | YJR035W                 | RAD26         |
| YER116C                                          | SLX8          | YKR099W                 | BAS1          |
| YMR133W                                          | REC114        | YOR327C                 | SNC2          |
| YEL009C                                          | GCN4          | YLR176C                 | RFX1          |
| YOR023C                                          | AHC1          | YLR233C                 | EST1          |
| YNL087W                                          | TCB2          | YLR441C                 | RPS1A         |
| YKL126W                                          | YPK1          | YOR043W                 | WHI2          |
| YNR032W                                          | PPG1          | YKR030W                 | GMH1          |
| YDR293C                                          | SSD1          | YGL151W                 | NUT1          |
| YMR224C                                          | MRE11         | YPR036W                 | VMA13         |
| YDR108W                                          | GSG1          | YJL004C                 | SYS1          |
| YLR170C                                          | APS1          | YOR036W                 | PEP12         |
| YBR173C                                          | UMP1          | YBR019C                 | GAL10         |
| YBL047C                                          | EDE1          | YPR120C                 | CLB5          |
| YPR018W                                          | RLF2          | YGR081C                 | SLX9          |



| Predictions at threshold level 0.80 continued... |               |                         |               |
|--------------------------------------------------|---------------|-------------------------|---------------|
| Gene1 of predicted pair                          |               | Gene2 of predicted pair |               |
| Systematic Name                                  | Standard Name | Systematic Name         | Standard Name |
| YML103C                                          | NUP188        | YPL246C                 | RBD2          |
| YMR109W                                          | MYO5          | YHR016C                 | YSC84         |
| YPL129W                                          | TAF14         | YER161C                 | SPT2          |
| YJR040W                                          | GEF1          | YGL115W                 | SNF4          |
| YNL297C                                          | MON2          | YNR032W                 | PPG1          |
| YNL041C                                          | COG6          | YDR153C                 | ENT5          |
| YNL291C                                          | MID1          | YPL105C                 | YPL105C       |
| YPR036W                                          | VMA13         | YLR371W                 | ROM2          |
| YDR108W                                          | GSG1          | YDL006W                 | PTC1          |
| YHR060W                                          | VMA22         | YEL043W                 | YEL043W       |
| YML103C                                          | NUP188        | YKL117W                 | SBA1          |
| YEL065W                                          | SIT1          | YER116C                 | SLX8          |
| YDR004W                                          | RAD57         | YDL154W                 | MSH5          |
| YLR240W                                          | VPS34         | YDR323C                 | PEP7          |
| YDR202C                                          | RAV2          | YPL037C                 | EGD1          |
| YJR040W                                          | GEF1          | YMR054W                 | STV1          |
| YHR111W                                          | UBA4          | YGR152C                 | RSR1          |
| YDR108W                                          | GSG1          | YCR066W                 | RAD18         |
| YJR140C                                          | HIR3          | YBR089C-A               | NHP6B         |
| YGL237C                                          | HAP2          | YBR114W                 | RAD16         |
| YNR052C                                          | POP2          | YPL022W                 | RAD1          |
| YHR171W                                          | ATG7          | YOR327C                 | SNC2          |
| YML001W                                          | YPT7          | YLR180W                 | SAM1          |
| YLR292C                                          | SEC72         | YLR381W                 | CTF3          |
| YHL031C                                          | GOS1          | YAL030W                 | SNC1          |
| YDR378C                                          | LSM6          | YJL095W                 | BCK1          |
| YDR146C                                          | SWI5          | YDR310C                 | SUM1          |
| YGL163C                                          | RAD54         | YLR315W                 | NKP2          |
| YKL007W                                          | CAP1          | YNL243W                 | SLA2          |

| Predictions at threshold level 0.80 continued... |               |                         |               |
|--------------------------------------------------|---------------|-------------------------|---------------|
| Gene1 of predicted pair                          |               | Gene2 of predicted pair |               |
| Systematic Name                                  | Standard Name | Systematic Name         | Standard Name |
| YOR337W                                          | TEA1          | YER162C                 | RAD4          |
| YEL027W                                          | CUP5          | YLR447C                 | VMA6          |
| YHR081W                                          | LRP1          | YMR152W                 | YIM1          |
| YGL003C                                          | CDH1          | YLR182W                 | SWI6          |
| YDR192C                                          | NUP42         | YLR131C                 | ACE2          |
| YNL229C                                          | URE2          | YDL047W                 | SIT4          |
| YLR191W                                          | PEX13         | YDR265W                 | PEX10         |
| YJL124C                                          | LSM1          | YJL006C                 | CTK2          |
| YOR033C                                          | EXO1          | YML028W                 | TSA1          |
| YPR084W                                          | YPR084W       | YJR140C                 | HIR3          |
| YOR106W                                          | VAM3          | YNR032W                 | PPG1          |
| YBR019C                                          | GAL10         | YBL025W                 | RRN10         |
| YHR073W                                          | OSH3          | YMR153W                 | NUP53         |
| YDL116W                                          | NUP84         | YHR134W                 | WSS1          |
| YDR378C                                          | LSM6          | YML112W                 | CTK3          |
| YLR240W                                          | VPS34         | YLR360W                 | VPS38         |
| YDR443C                                          | SSN2          | YIL159W                 | BNR1          |
| YEL009C                                          | GCN4          | YGL252C                 | RTG2          |
| YBR173C                                          | UMP1          | YER044C                 | ERG28         |
| YKR095W                                          | MLP1          | YDR076W                 | RAD55         |
| YGL147C                                          | RPL9A         | YLR386W                 | VAC14         |
| YER116C                                          | SLX8          | YER040W                 | GLN3          |
| YCR077C                                          | PAT1          | YGR135W                 | PRE9          |
| YGR249W                                          | MGA1          | YLR192C                 | HCR1          |
| YMR224C                                          | MRE11         | YMR179W                 | SPT21         |
| YGR020C                                          | VMA7          | YJL095W                 | BCK1          |
| YKR048C                                          | NAP1          | YNL078W                 | NIS1          |
| YGL087C                                          | MMS2          | YJR032W                 | CPR7          |
| YMR055C                                          | BUB2          | YDL013W                 | SLX5          |

| Predictions at threshold level 0.80 continued... |               |                         |               |
|--------------------------------------------------|---------------|-------------------------|---------------|
| Gene1 of predicted pair                          |               | Gene2 of predicted pair |               |
| Systematic Name                                  | Standard Name | Systematic Name         | Standard Name |
| YHR178W                                          | STB5          | YGL013C                 | PDR1          |
| YDR293C                                          | SSD1          | YJL095W                 | BCK1          |
| YNL087W                                          | TCB2          | YCR053W                 | THR4          |
| YNL236W                                          | SIN4          | YDL226C                 | GCS1          |
| YLR240W                                          | VPS34         | YLR396C                 | VPS33         |
| YBR108W                                          | YBR108W       | YMR152W                 | YIM1          |
| YEL065W                                          | SIT1          | YDR358W                 | GGA1          |
| YFR024C-A                                        | LSB3          | YJL004C                 | SYS1          |
| YPR131C                                          | NAT3          | YBR215W                 | HPC2          |
| YOR066W                                          | MSA1          | YLR371W                 | ROM2          |
| YKR099W                                          | BAS1          | YOR035C                 | SHE4          |
| YOR106W                                          | VAM3          | YHR115C                 | DMA1          |
| YLR090W                                          | XDJ1          | YMR142C                 | RPL13B        |
| YLR399C                                          | BDF1          | YBR107C                 | IML3          |
| YER042W                                          | MXR1          | YGR209C                 | TRX2          |
| YDR496C                                          | PUF6          | YKL130C                 | SHE2          |
| YOR327C                                          | SNC2          | YDL047W                 | SIT4          |
| YPR084W                                          | YPR084W       | YHL020C                 | OPI1          |
| YML115C                                          | VAN1          | YDR260C                 | SWM1          |
| YNL291C                                          | MID1          | YJR033C                 | RAV1          |
| YLR337C                                          | VRP1          | YKL006W                 | RPL14A        |
| YMR039C                                          | SUB1          | YBR215W                 | HPC2          |
| YBR030W                                          | YBR030W       | YER116C                 | SLX8          |
| YOR083W                                          | WHI5          | YPR119W                 | CLB2          |
| YNL199C                                          | GCR2          | YDR363W-A               | SEM1          |
| YLR433C                                          | CNA1          | YGR006W                 | PRP18         |
| YPR084W                                          | YPR084W       | YLR360W                 | VPS38         |
| YLR292C                                          | SEC72         | YJR090C                 | GRR1          |
| YDR171W                                          | HSP42         | YDR318W                 | MCM21         |

| Predictions at threshold level 0.80 continued... |               |                         |               |
|--------------------------------------------------|---------------|-------------------------|---------------|
| Gene1 of predicted pair                          |               | Gene2 of predicted pair |               |
| Systematic Name                                  | Standard Name | Systematic Name         | Standard Name |
| YLR234W                                          | TOP3          | YJL138C                 | TIF2          |
| YNL307C                                          | MCK1          | YIR005W                 | IST3          |
| YEL043W                                          | YEL043W       | YLR309C                 | IMH1          |
| YMR224C                                          | MRE11         | YML071C                 | COG8          |
| YNL041C                                          | COG6          | YKR014C                 | YPT52         |
| YLR095C                                          | IOC2          | YHR081W                 | LRP1          |
| YEL043W                                          | YEL043W       | YML071C                 | COG8          |
| YDR079C-A                                        | TFB5          | YPL240C                 | HSP82         |
| YKL139W                                          | CTK1          | YCL011C                 | GBP2          |
| YKR099W                                          | BAS1          | YNL076W                 | MKS1          |
| YOR080W                                          | DIA2          | YPL018W                 | CTF19         |
| YOR127W                                          | RGA1          | YDL047W                 | SIT4          |
| YMR205C                                          | PFK2          | YBR131W                 | CCZ1          |
| YDL020C                                          | RPN4          | YJR035W                 | RAD26         |
| YPL240C                                          | HSP82         | YGR296W                 | YRF1-3        |
| YIL159W                                          | BNR1          | YKR099W                 | BAS1          |
| YDL184C                                          | RPL41A        | YFR036W                 | CDC26         |
| YCL027W                                          | FUS1          | YKL092C                 | BUD2          |
| YLR337C                                          | VRP1          | YNL079C                 | TPM1          |
| YLR441C                                          | RPS1A         | YER139C                 | YER139C       |
| YNL218W                                          | MGS1          | YBR228W                 | SLX1          |
| YKR020W                                          | VPS51         | YHR039C-A               | VMA10         |
| YOL126C                                          | MDH2          | YMR164C                 | MSS11         |
| YMR284W                                          | YKU70         | YOL030W                 | GAS5          |
| YHR205W                                          | SCH9          | YNL271C                 | BNI1          |
| YOR243C                                          | PUS7          | YGR071C                 | YGR071C       |
| YDR245W                                          | MNN10         | YBL072C                 | RPS8A         |
| YCR020C-A                                        | MAK31         | YNL107W                 | YAF9          |
| YLR360W                                          | VPS38         | YAL002W                 | VPS8          |

| Predictions at threshold level 0.80 continued... |               |                         |               |
|--------------------------------------------------|---------------|-------------------------|---------------|
| Gene1 of predicted pair                          |               | Gene2 of predicted pair |               |
| Systematic Name                                  | Standard Name | Systematic Name         | Standard Name |
| YBR030W                                          | YBR030W       | YJL183W                 | MNN11         |
| YGR054W                                          | YGR054W       | YAR014C                 | BUD14         |
| YBL003C                                          | HTA2          | YNL107W                 | YAF9          |
| YGL054C                                          | ERV14         | YKR030W                 | GMH1          |
| YJR032W                                          | CPR7          | YNL076W                 | MKS1          |
| YCR077C                                          | PAT1          | YBL101C                 | ECM21         |
| YDR146C                                          | SWI5          | YML016C                 | PPZ1          |
| YKR001C                                          | VPS1          | YJR060W                 | CBF1          |
| YKL139W                                          | CTK1          | YML001W                 | YPT7          |
| YFR010W                                          | UBP6          | YDR477W                 | SNF1          |
| YBR108W                                          | YBR108W       | YPL161C                 | BEM4          |
| YLR452C                                          | SST2          | YJL006C                 | CTK2          |
| YDL005C                                          | MED2          | YNL236W                 | SIN4          |
| YDL116W                                          | NUP84         | YML103C                 | NUP188        |
| YHR178W                                          | STB5          | YGL237C                 | HAP2          |
| YJR060W                                          | CBF1          | YER122C                 | GLO3          |
| YIL076W                                          | SEC28         | YPR046W                 | MCM16         |
| YHR039C-A                                        | VMA10         | YDL192W                 | ARF1          |
| YPL115C                                          | BEM3          | YDR293C                 | SSD1          |
| YGL087C                                          | MMS2          | YGR184C                 | UBR1          |
| YEL050C                                          | RML2          | YDR318W                 | MCM21         |
| YNL044W                                          | YIP3          | YJR032W                 | CPR7          |
| YOR127W                                          | RGA1          | YHR111W                 | UBA4          |
| YCR020C-A                                        | MAK31         | YJR033C                 | RAV1          |
| YKL116C                                          | PRR1          | YMR230W                 | RPS10B        |
| YBR231C                                          | SWC5          | YGL094C                 | PAN2          |
| YJR040W                                          | GEF1          | YPL120W                 | VPS30         |
| YNL325C                                          | FIG4          | YDL077C                 | VAM6          |
| YDR144C                                          | MKC7          | YDR310C                 | SUM1          |

| Predictions at threshold level 0.80 continued... |               |                         |               |
|--------------------------------------------------|---------------|-------------------------|---------------|
| Gene1 of predicted pair                          |               | Gene2 of predicted pair |               |
| Systematic Name                                  | Standard Name | Systematic Name         | Standard Name |
| YBR200W                                          | BEM1          | YGL115W                 | SNF4          |
| YPL105C                                          | YPL105C       | YNR032W                 | PPG1          |
| YGL025C                                          | PGD1          | YPL248C                 | GAL4          |
| YFR031C-A                                        | RPL2A         | YJL004C                 | SYS1          |
| YNL236W                                          | SIN4          | YNL107W                 | YAF9          |
| YDL116W                                          | NUP84         | YKR061W                 | KTR2          |
| YML016C                                          | PPZ1          | YDR335W                 | MSN5          |
| YMR127C                                          | SAS2          | YNL166C                 | BNI5          |
| YPR131C                                          | NAT3          | YDR171W                 | HSP42         |
| YDR245W                                          | MNN10         | YKL041W                 | VPS24         |
| YMR109W                                          | MYO5          | YOR247W                 | SRL1          |
| YNL025C                                          | SSN8          | YKL213C                 | DOA1          |
| YLR083C                                          | EMP70         | YFR031C-A               | RPL2A         |
| YHR111W                                          | UBA4          | YOR327C                 | SNC2          |
| YOR112W                                          | CEX1          | YML071C                 | COG8          |
| YKL139W                                          | CTK1          | YMR016C                 | SOK2          |
| YOR132W                                          | VPS17         | YBR108W                 | YBR108W       |
| YGR104C                                          | SRB5          | YGL151W                 | NUT1          |
| YGL212W                                          | VAM7          | YGL200C                 | EMP24         |
| YHR013C                                          | ARD1          | YKL160W                 | ELF1          |
| YHL025W                                          | SNF6          | YLR357W                 | RSC2          |
| YER052C                                          | HOM3          | YNL135C                 | FPR1          |
| YLR398C                                          | SKI2          | YLR180W                 | SAM1          |
| YLR315W                                          | NKP2          | YHR167W                 | THP2          |
| YOR337W                                          | TEA1          | YMR026C                 | PEX12         |
| YMR026C                                          | PEX12         | YOL121C                 | RPS19A        |
| YNL199C                                          | GCR2          | YLR350W                 | ORM2          |
| YHR013C                                          | ARD1          | YIR005W                 | IST3          |
| YOR156C                                          | NFI1          | YDR469W                 | SDC1          |

| Predictions at threshold level 0.80 continued... |               |                         |               |
|--------------------------------------------------|---------------|-------------------------|---------------|
| Gene1 of predicted pair                          |               | Gene2 of predicted pair |               |
| Systematic Name                                  | Standard Name | Systematic Name         | Standard Name |
| YER120W                                          | SCS2          | YML071C                 | COG8          |
| YPL253C                                          | VIK1          | YJR060W                 | CBF1          |
| YEL053C                                          | MAK10         | YDL077C                 | VAM6          |
| YML115C                                          | VAN1          | YKL119C                 | VPH2          |
| YBR171W                                          | SEC66         | YBL047C                 | EDE1          |
| YJL172W                                          | CPS1          | YDL192W                 | ARF1          |
| YDR477W                                          | SNF1          | YOR106W                 | VAM3          |
| YKR001C                                          | VPS1          | YMR204C                 | INP1          |
| YLR456W                                          | YLR456W       | YPR119W                 | CLB2          |
| YGR135W                                          | PRE9          | YAR014C                 | BUD14         |
| YLR381W                                          | CTF3          | YJR063W                 | RPA12         |
| YDR137W                                          | RGP1          | YOL111C                 | MDY2          |
| YJL176C                                          | SWI3          | YHR134W                 | WSS1          |
| YNL054W                                          | VAC7          | YDR335W                 | MSN5          |
| YGL223C                                          | COG1          | YEL053C                 | MAK10         |
| YLR095C                                          | IOC2          | YPL161C                 | BEM4          |
| YEL065W                                          | SIT1          | YMR142C                 | RPL13B        |
| YPR084W                                          | YPR084W       | YBL102W                 | SFT2          |
| YMR142C                                          | RPL13B        | YDR207C                 | UME6          |
| YCR065W                                          | HCM1          | YNL041C                 | COG6          |
| YIL034C                                          | CAP2          | YGL087C                 | MMS2          |
| YPL161C                                          | BEM4          | YCR086W                 | CSM1          |
| YGR019W                                          | UGA1          | YPL018W                 | CTF19         |
| YGR104C                                          | SRB5          | YGL066W                 | SGF73         |
| YNL087W                                          | TCB2          | YPL161C                 | BEM4          |
| YKL135C                                          | APL2          | YDR358W                 | GGA1          |
| YKR099W                                          | BAS1          | YOR327C                 | SNC2          |
| YBR107C                                          | IML3          | YOL054W                 | PSH1          |
| YLR386W                                          | VAC14         | YDR335W                 | MSN5          |

| Predictions at threshold level 0.80 continued... |               |                         |               |
|--------------------------------------------------|---------------|-------------------------|---------------|
| Gene1 of predicted pair                          |               | Gene2 of predicted pair |               |
| Systematic Name                                  | Standard Name | Systematic Name         | Standard Name |
| YJL053W                                          | PEP8          | YPL037C                 | EGD1          |
| YOR080W                                          | DIA2          | YDR363W-A               | SEM1          |
| YBR215W                                          | HPC2          | YCR077C                 | PAT1          |
| YIL053W                                          | RHR2          | YNL325C                 | FIG4          |
| YBR217W                                          | ATG12         | YNL325C                 | FIG4          |
| YML112W                                          | CTK3          | YGL252C                 | RTG2          |
| YGR105W                                          | VMA21         | YDR358W                 | GGA1          |
| YEL065W                                          | SIT1          | YDL083C                 | RPS16B        |
| YOR112W                                          | CEX1          | YNL041C                 | COG6          |
| YHR013C                                          | ARD1          | YKR014C                 | YPT52         |
| YER019C-A                                        | SBH2          | YML019W                 | OST6          |
| YIL034C                                          | CAP2          | YDL155W                 | CLB3          |
| YLR119W                                          | SRN2          | YMR153W                 | NUP53         |
| YNL325C                                          | FIG4          | YNR072W                 | HXT17         |
| YOR337W                                          | TEA1          | YBR019C                 | GAL10         |
| YBR131W                                          | CCZ1          | YBL101C                 | ECM21         |
| YPL037C                                          | EGD1          | YLR398C                 | SKI2          |
| YNL032W                                          | SIW14         | YMR273C                 | ZDS1          |
| YKR001C                                          | VPS1          | YML001W                 | YPT7          |
| YJL183W                                          | MNN11         | YNL076W                 | MKS1          |
| YOL051W                                          | GAL11         | YDR363W-A               | SEM1          |
| YNL243W                                          | SLA2          | YKL135C                 | APL2          |
| YOR290C                                          | SNF2          | YGL212W                 | VAM7          |
| YDR448W                                          | ADA2          | YPL042C                 | SSN3          |
| YLR301W                                          | YLR301W       | YPL240C                 | HSP82         |
| YJL176C                                          | SWI3          | YPL079W                 | RPL21B        |
| YGL087C                                          | MMS2          | YHL002W                 | HSE1          |
| YPL253C                                          | VIK1          | YGL115W                 | SNF4          |
| YMR116C                                          | ASC1          | YKL032C                 | IXR1          |



| Predictions at threshold level 0.80 continued... |               |                         |               |
|--------------------------------------------------|---------------|-------------------------|---------------|
| Gene1 of predicted pair                          |               | Gene2 of predicted pair |               |
| Systematic Name                                  | Standard Name | Systematic Name         | Standard Name |
| YOR069W                                          | VPS5          | YPL037C                 | EGD1          |
| YMR095C                                          | SNO1          | YOR035C                 | SHE4          |
| YML001W                                          | YPT7          | YJL095W                 | BCK1          |
| YLR371W                                          | ROM2          | YPL195W                 | APL5          |
| YPR051W                                          | MAK3          | YHR060W                 | VMA22         |
| YLR192C                                          | HCR1          | YKL116C                 | PRR1          |
| YER161C                                          | SPT2          | YOR038C                 | HIR2          |
| YHR206W                                          | SKN7          | YJR074W                 | MOG1          |
| YEL065W                                          | SIT1          | YDR477W                 | SNF1          |
| YDR155C                                          | CPR1          | YNL107W                 | YAF9          |
| YDR171W                                          | HSP42         | YJR005W                 | APL1          |
| YJL154C                                          | VPS35         | YHR134W                 | WSS1          |
| YDL223C                                          | HBT1          | YNL076W                 | MKS1          |
| YKL048C                                          | ELM1          | YEL060C                 | PRB1          |
| YGR105W                                          | VMA21         | YKR030W                 | GMH1          |
| YOR270C                                          | VPH1          | YKL080W                 | VMA5          |
| YHR161C                                          | YAP1801       | YNR049C                 | MSO1          |
| YLR360W                                          | VPS38         | YKL048C                 | ELM1          |
| YDL223C                                          | HBT1          | YNL079C                 | TPM1          |
| YGL200C                                          | EMP24         | YKL041W                 | VPS24         |
| YDR469W                                          | SDC1          | YOR308C                 | SNU66         |
| YIL159W                                          | BNR1          | YNL032W                 | SIW14         |
| YJL089W                                          | SIP4          | YMR280C                 | CAT8          |
| YPL115C                                          | BEM3          | YLR006C                 | SSK1          |
| YDR129C                                          | SAC6          | YDR389W                 | SAC7          |
| YKL025C                                          | PAN3          | YLR381W                 | CTF3          |
| YBR195C                                          | MSI1          | YGL163C                 | RAD54         |
| YPL022W                                          | RAD1          | YML102W                 | CAC2          |
| YJL053W                                          | PEP8          | YKR001C                 | VPS1          |

| Predictions at threshold level 0.80 continued... |               |                         |               |
|--------------------------------------------------|---------------|-------------------------|---------------|
| Gene1 of predicted pair                          |               | Gene2 of predicted pair |               |
| Systematic Name                                  | Standard Name | Systematic Name         | Standard Name |
| YGL200C                                          | EMP24         | YBL072C                 | RPS8A         |
| YBR200W                                          | BEM1          | YDR171W                 | HSP42         |
| YPR018W                                          | RLF2          | YPL024W                 | RMI1          |
| YLR234W                                          | TOP3          | YPR051W                 | MAK3          |
| YGL212W                                          | VAM7          | YAL030W                 | SNC1          |
| YAL010C                                          | MDM10         | YLR254C                 | NDL1          |
| YEL009C                                          | GCN4          | YBR111W-A               | SUS1          |
| YHR111W                                          | UBA4          | YGR054W                 | YGR054W       |
| YHR098C                                          | SFB3          | YJR075W                 | HOC1          |
| YBR200W                                          | BEM1          | YML016C                 | PPZ1          |
| YBL051C                                          | PIN4          | YER110C                 | KAP123        |
| YPR036W                                          | VMA13         | YDL083C                 | RPS16B        |
| YHL027W                                          | RIM101        | YDR310C                 | SUM1          |
| YGL078C                                          | DBP3          | YDR477W                 | SNF1          |
| YML117W                                          | NAB6          | YBR131W                 | CCZ1          |
| YLR288C                                          | MEC3          | YDR076W                 | RAD55         |
| YPR030W                                          | CSR2          | YJL183W                 | MNN11         |
| YNL309W                                          | STB1          | YLR452C                 | SST2          |
| YNL291C                                          | MID1          | YGL100W                 | SEH1          |
| YPL018W                                          | CTF19         | YOL091W                 | SPO21         |
| YLR234W                                          | TOP3          | YGR188C                 | BUB1          |
| YPL253C                                          | VIK1          | YKL048C                 | ELM1          |
| YLR441C                                          | RPS1A         | YLR452C                 | SST2          |
| YOR195W                                          | SLK19         | YLR032W                 | RAD5          |
| YPL001W                                          | HAT1          | YGL161C                 | YIP5          |
| YER116C                                          | SLX8          | YOR327C                 | SNC2          |
| YIL034C                                          | CAP2          | YBL021C                 | HAP3          |
| YGR270W                                          | YTA7          | YNL107W                 | YAF9          |
| YAL024C                                          | LTE1          | YDR137W                 | RGP1          |

| Predictions at threshold level 0.80 continued... |               |                         |               |
|--------------------------------------------------|---------------|-------------------------|---------------|
| Gene1 of predicted pair                          |               | Gene2 of predicted pair |               |
| Systematic Name                                  | Standard Name | Systematic Name         | Standard Name |
| YGR249W                                          | MGA1          | YJL172W                 | CPS1          |
| YBR173C                                          | UMP1          | YJL095W                 | BCK1          |
| YPR046W                                          | MCM16         | YGL151W                 | NUT1          |
| YKL116C                                          | PRR1          | YJL172W                 | CPS1          |
| YJL136C                                          | RPS21B        | YHR200W                 | RPN10         |
| YOR035C                                          | SHE4          | YOR327C                 | SNC2          |
| YGL253W                                          | HXK2          | YEL056W                 | HAT2          |
| YKL048C                                          | ELM1          | YMR133W                 | REC114        |
| YFR010W                                          | UBP6          | YOR327C                 | SNC2          |
| YAL055W                                          | PEX22         | YKL041W                 | VPS24         |
| YOR337W                                          | TEA1          | YBR280C                 | SAF1          |
| YLR192C                                          | HCR1          | YMR142C                 | RPL13B        |
| YMR216C                                          | SKY1          | YGR105W                 | VMA21         |
| YNL201C                                          | PSY2          | YCR086W                 | CSM1          |
| YNL307C                                          | MCK1          | YER122C                 | GLO3          |
| YNL307C                                          | MCK1          | YJR084W                 | CSN12         |
| YCR002C                                          | CDC10         | YKL101W                 | HSL1          |
| YNL206C                                          | RTT106        | YML016C                 | PPZ1          |
| YER107C                                          | GLE2          | YOL012C                 | HTZ1          |
| YDR320C                                          | SWA2          | YEL042W                 | GDA1          |
| YNL201C                                          | PSY2          | YDL116W                 | NUP84         |
| YLR386W                                          | VAC14         | YOL081W                 | IRA2          |
| YJR032W                                          | CPR7          | YPR046W                 | MCM16         |
| YGL212W                                          | VAM7          | YGL115W                 | SNF4          |
| YLR094C                                          | GIS3          | YMR230W                 | RPS10B        |
| YOR066W                                          | MSA1          | YJR032W                 | CPR7          |
| YBR200W                                          | BEM1          | YNR072W                 | HXT17         |
| YDR137W                                          | RGP1          | YLR315W                 | NKP2          |
| YLR090W                                          | XDJ1          | YLR119W                 | SRN2          |

| Predictions at threshold level 0.80 continued... |               |                         |               |
|--------------------------------------------------|---------------|-------------------------|---------------|
| Gene1 of predicted pair                          |               | Gene2 of predicted pair |               |
| Systematic Name                                  | Standard Name | Systematic Name         | Standard Name |
| YLR337C                                          | VRP1          | YPR046W                 | MCM16         |
| YOL147C                                          | PEX11         | YDL065C                 | PEX19         |
| YDR484W                                          | VPS52         | YLR180W                 | SAM1          |
| YKL025C                                          | PAN3          | YNL166C                 | BNI5          |
| YBR171W                                          | SEC66         | YPR120C                 | CLB5          |
| YMR016C                                          | SOK2          | YBR171W                 | SEC66         |
| YPL024W                                          | RMI1          | YML058W                 | SML1          |
| YKL025C                                          | PAN3          | YPL253C                 | VIK1          |
| YLL022C                                          | HIF1          | YBR009C                 | HHF1          |
| YEL065W                                          | SIT1          | YIL053W                 | RHR2          |
| YPL161C                                          | BEM4          | YNL090W                 | RHO2          |
| YGL161C                                          | YIP5          | YDR289C                 | RTT103        |
| YJL036W                                          | SNX4          | YHR012W                 | VPS29         |
| YJL006C                                          | CTK2          | YGL252C                 | RTG2          |
| YNL297C                                          | MON2          | YNL051W                 | COG5          |
| YHR134W                                          | WSS1          | YBL079W                 | NUP170        |
| YBL078C                                          | ATG8          | YLR396C                 | VPS33         |
| YDR320C                                          | SWA2          | YOR127W                 | RGA1          |
| YOR132W                                          | VPS17         | YDR207C                 | UME6          |
| YMR179W                                          | SPT21         | YLR410W                 | VIP1          |
| YDL185W                                          | TFP1          | YJR033C                 | RAV1          |
| YPR018W                                          | RLF2          | YDL013W                 | SLX5          |
| YNL291C                                          | MID1          | YNL041C                 | COG6          |
| YOR358W                                          | HAP5          | YJL095W                 | BCK1          |
| YOR001W                                          | RRP6          | YJR135C                 | MCM22         |
| YIL036W                                          | CST6          | YAR014C                 | BUD14         |
| YMR055C                                          | BUB2          | YER161C                 | SPT2          |
| YMR224C                                          | MRE11         | YKL110C                 | KTI12         |
| YDR245W                                          | MNN10         | YBR041W                 | FAT1          |

| Predictions at threshold level 0.80 continued... |               |                         |               |
|--------------------------------------------------|---------------|-------------------------|---------------|
| Gene1 of predicted pair                          |               | Gene2 of predicted pair |               |
| Systematic Name                                  | Standard Name | Systematic Name         | Standard Name |
| YDR443C                                          | SSN2          | YBR173C                 | UMP1          |
| YDR192C                                          | NUP42         | YGL163C                 | RAD54         |
| YLR370C                                          | ARC18         | YNL107W                 | YAF9          |
| YIL156W                                          | UBP7          | YKL117W                 | SBA1          |
| YCL067C                                          | HMLALPHA2     | YCR084C                 | TUP1          |
| YOR195W                                          | SLK19         | YBL047C                 | EDE1          |
| YFR036W                                          | CDC26         | YKL041W                 | VPS24         |
| YER107C                                          | GLE2          | YKR082W                 | NUP133        |
| YML094W                                          | GIM5          | YHR056C                 | RSC30         |
| YJL183W                                          | MNN11         | YEL036C                 | ANP1          |
| YOL044W                                          | PEX15         | YGR077C                 | PEX8          |
| YMR016C                                          | SOK2          | YBR200W                 | BEM1          |
| YER049W                                          | TPA1          | YOR014W                 | RTS1          |
| YGL115W                                          | SNF4          | YPL195W                 | APL5          |
| YMR142C                                          | RPL13B        | YOL121C                 | RPS19A        |
| YMR273C                                          | ZDS1          | YCR053W                 | THR4          |
| YDR137W                                          | RGP1          | YOR308C                 | SNU66         |
| YER001W                                          | MNN1          | YLR370C                 | ARC18         |
| YLL026W                                          | HSP104        | YLR357W                 | RSC2          |
| YMR198W                                          | CIK1          | YKR020W                 | VPS51         |
| YNL032W                                          | SIW14         | YNL087W                 | TCB2          |
| YNL087W                                          | TCB2          | YDR207C                 | UME6          |
| YGL223C                                          | COG1          | YJR040W                 | GEF1          |
| YPL129W                                          | TAF14         | YBL003C                 | HTA2          |
| YBR020W                                          | GAL1          | YGR135W                 | PRE9          |
| YPR051W                                          | MAK3          | YMR055C                 | BUB2          |
| YMR116C                                          | ASC1          | YDR245W                 | MNN10         |
| YPL057C                                          | SUR1          | YOL111C                 | MDY2          |
| YER144C                                          | UBP5          | YJL095W                 | BCK1          |

| Predictions at threshold level 0.80 continued... |               |                         |               |
|--------------------------------------------------|---------------|-------------------------|---------------|
| Gene1 of predicted pair                          |               | Gene2 of predicted pair |               |
| Systematic Name                                  | Standard Name | Systematic Name         | Standard Name |
| YEL053C                                          | MAK10         | YOL018C                 | TLG2          |
| YBL025W                                          | RRN10         | YDR310C                 | SUM1          |
| YNL215W                                          | IES2          | YGL200C                 | EMP24         |
| YNL230C                                          | ELA1          | YCL014W                 | BUD3          |
| YNL206C                                          | RTT106        | YDR363W-A               | SEM1          |
| YJR032W                                          | CPR7          | YJL183W                 | MNN11         |
| YCR065W                                          | HCM1          | YDL047W                 | SIT4          |
| YLR292C                                          | SEC72         | YMR109W                 | MYO5          |
| YKL116C                                          | PRR1          | YMR133W                 | REC114        |
| YJL053W                                          | PEP8          | YPL161C                 | BEM4          |
| YLR095C                                          | IOC2          | YBL103C                 | RTG3          |
| YGL003C                                          | CDH1          | YOR327C                 | SNC2          |
| YML016C                                          | PPZ1          | YNL079C                 | TPM1          |
| YKR057W                                          | RPS21A        | YNL229C                 | URE2          |
| YBR171W                                          | SEC66         | YDR183W                 | PLP1          |
| YLR441C                                          | RPS1A         | YHR060W                 | VMA22         |
| YJL172W                                          | CPS1          | YPL137C                 | GIP3          |
| YOR001W                                          | RRP6          | YMR038C                 | CCS1          |
| YLR288C                                          | MEC3          | YDR207C                 | UME6          |
| YDR335W                                          | MSN5          | YBL079W                 | NUP170        |
| YMR224C                                          | MRE11         | YJL187C                 | SWE1          |
| YOR332W                                          | VMA4          | YJL095W                 | BCK1          |
| YPR018W                                          | RLF2          | YHR010W                 | RPL27A        |
| YDR480W                                          | DIG2          | YBL016W                 | FUS3          |
| YIL053W                                          | RHR2          | YPL137C                 | GIP3          |
| YBR200W                                          | BEM1          | YJR060W                 | CBF1          |
| YLR148W                                          | PEP3          | YPL195W                 | APL5          |
| YDR225W                                          | HTA1          | YNL206C                 | RTT106        |
| YMR224C                                          | MRE11         | YNL058C                 | YNL058C       |

| Predictions at threshold level 0.80 continued... |               |                         |               |
|--------------------------------------------------|---------------|-------------------------|---------------|
| Gene1 of predicted pair                          |               | Gene2 of predicted pair |               |
| Systematic Name                                  | Standard Name | Systematic Name         | Standard Name |
| YBR127C                                          | VMA2          | YEL051W                 | VMA8          |
| YKR035W-A                                        | DID2          | YPL137C                 | GIP3          |
| YPL161C                                          | BEM4          | YPL256C                 | CLN2          |
| YGR020C                                          | VMA7          | YEL043W                 | YEL043W       |
| YML012W                                          | ERV25         | YML067C                 | ERV41         |
| YLR093C                                          | NYV1          | YOR035C                 | SHE4          |
| YAL010C                                          | MDM10         | YOL054W                 | PSH1          |
| YMR109W                                          | MYO5          | YKL204W                 | EAP1          |
| YGL212W                                          | VAM7          | YLR370C                 | ARC18         |
| YGR270W                                          | YTA7          | YJR032W                 | CPR7          |
| YDR484W                                          | VPS52         | YLR093C                 | NYV1          |
| YOR304W                                          | ISW2          | YJR094C                 | IME1          |
| YOR127W                                          | RGA1          | YJL136C                 | RPS21B        |
| YKL139W                                          | CTK1          | YHR013C                 | ARD1          |
| YNL206C                                          | RTT106        | YBR200W                 | BEM1          |
| YCR084C                                          | TUP1          | YPR068C                 | HOS1          |
| YNL288W                                          | CAF40         | YCR086W                 | CSM1          |
| YKL007W                                          | CAP1          | YKR048C                 | NAP1          |
| YLR370C                                          | ARC18         | YHL002W                 | HSE1          |
| YLR386W                                          | VAC14         | YMR016C                 | SOK2          |
| YBL102W                                          | SFT2          | YIL076W                 | SEC28         |
| YGL212W                                          | VAM7          | YEL013W                 | VAC8          |
| YNR072W                                          | HXT17         | YHR060W                 | VMA22         |
| YCR086W                                          | CSM1          | YAL002W                 | VPS8          |
| YNL107W                                          | YAF9          | YPR032W                 | SRO7          |
| YDR320C                                          | SWA2          | YNR032W                 | PPG1          |
| YBR289W                                          | SNF5          | YLR357W                 | RSC2          |
| YOR270C                                          | VPH1          | YLR093C                 | NYV1          |
| YDR507C                                          | GIN4          | YGL163C                 | RAD54         |

| Predictions at threshold level 0.80 continued... |               |                         |               |
|--------------------------------------------------|---------------|-------------------------|---------------|
| Gene1 of predicted pair                          |               | Gene2 of predicted pair |               |
| Systematic Name                                  | Standard Name | Systematic Name         | Standard Name |
| YFL023W                                          | BUD27         | YPL057C                 | SUR1          |
| YFR010W                                          | UBP6          | YHR077C                 | NMD2          |
| YGL100W                                          | SEH1          | YKL113C                 | RAD27         |
| YDL155W                                          | CLB3          | YML028W                 | TSA1          |
| YNL243W                                          | SLA2          | YLR262C                 | YPT6          |
| YNR052C                                          | POP2          | YLR381W                 | CTF3          |
| YBL102W                                          | SFT2          | YML001W                 | YPT7          |
| YDL161W                                          | ENT1          | YLR396C                 | VPS33         |
| YOR038C                                          | HIR2          | YDR440W                 | DOT1          |
| YDL013W                                          | SLX5          | YGL163C                 | RAD54         |
| YEL053C                                          | MAK10         | YGL115W                 | SNF4          |
| YBL103C                                          | RTG3          | YER044C                 | ERG28         |
| YOR275C                                          | RIM20         | YHL027W                 | RIM101        |
| YBR173C                                          | UMP1          | YEL060C                 | PRB1          |
| YCL001W                                          | RER1          | YMR054W                 | STV1          |
| YPL253C                                          | VIK1          | YEL036C                 | ANP1          |
| YNL325C                                          | FIG4          | YOR035C                 | SHE4          |
| YLR386W                                          | VAC14         | YMR152W                 | YIM1          |
| YCR066W                                          | RAD18         | YCL001W                 | RER1          |
| YEL050C                                          | RML2          | YOR080W                 | DIA2          |
| YER116C                                          | SLX8          | YFL023W                 | BUD27         |
| YDL116W                                          | NUP84         | YFR030W                 | MET10         |
| YLR083C                                          | EMP70         | YDL077C                 | VAM6          |
| YIL076W                                          | SEC28         | YOR038C                 | HIR2          |
| YMR172W                                          | HOT1          | YAR014C                 | BUD14         |
| YCR086W                                          | CSM1          | YGL124C                 | MON1          |
| YOR026W                                          | BUB3          | YNL243W                 | SLA2          |
| YDL080C                                          | THI3          | YHR200W                 | RPN10         |
| YLR313C                                          | SPH1          | YMR038C                 | CCS1          |



| Predictions at threshold level 0.80 continued... |               |                         |               |
|--------------------------------------------------|---------------|-------------------------|---------------|
| Gene1 of predicted pair                          |               | Gene2 of predicted pair |               |
| Systematic Name                                  | Standard Name | Systematic Name         | Standard Name |
| YKL139W                                          | CTK1          | YNR052C                 | POP2          |
| YOR358W                                          | HAP5          | YMR273C                 | ZDS1          |
| YJL095W                                          | BCK1          | YBR082C                 | UBC4          |
| YJR056C                                          | YJR056C       | YPL195W                 | APL5          |
| YGR054W                                          | YGR054W       | YEL053C                 | MAK10         |
| YML001W                                          | YPT7          | YLR309C                 | IMH1          |
| YCR020C-A                                        | MAK31         | YPR032W                 | SRO7          |
| YML016C                                          | PPZ1          | YDR144C                 | MKC7          |
| YJR032W                                          | CPR7          | YAL002W                 | VPS8          |
| YNL325C                                          | FIG4          | YLR398C                 | SKI2          |
| YBR108W                                          | YBR108W       | YGL115W                 | SNF4          |
| YLR292C                                          | SEC72         | YJL190C                 | RPS22A        |
| YBR274W                                          | CHK1          | YOR038C                 | HIR2          |
| YCR084C                                          | TUP1          | YBR010W                 | HHT1          |
| YDR244W                                          | PEX5          | YDR142C                 | PEX7          |
| YDR137W                                          | RGP1          | YOR035C                 | SHE4          |
| YOR290C                                          | SNF2          | YDL223C                 | HBT1          |
| YDR137W                                          | RGP1          | YLR094C                 | GIS3          |
| YJL006C                                          | CTK2          | YGR135W                 | PRE9          |
| YMR026C                                          | PEX12         | YCR053W                 | THR4          |
| YDR108W                                          | GSG1          | YGL174W                 | BUD13         |
| YIR005W                                          | IST3          | YJR050W                 | ISY1          |
| YOR132W                                          | VPS17         | YGR105W                 | VMA21         |
| YDR207C                                          | UME6          | YAL002W                 | VPS8          |
| YEL050C                                          | RML2          | YJR060W                 | CBF1          |
| YKR035W-A                                        | DID2          | YMR230W                 | RPS10B        |
| YFR010W                                          | UBP6          | YKL101W                 | HSL1          |
| YER144C                                          | UBP5          | YFL023W                 | BUD27         |
| YGL033W                                          | HOP2          | YBR200W                 | BEM1          |

| Predictions at threshold level 0.80 continued... |               |                         |               |
|--------------------------------------------------|---------------|-------------------------|---------------|
| Gene1 of predicted pair                          |               | Gene2 of predicted pair |               |
| Systematic Name                                  | Standard Name | Systematic Name         | Standard Name |
| YKR099W                                          | BAS1          | YNR072W                 | HXT17         |
| YOR231W                                          | MKK1          | YLR313C                 | SPH1          |
| YJR032W                                          | CPR7          | YLR350W                 | ORM2          |
| YPR030W                                          | CSR2          | YPL195W                 | APL5          |
| YMR016C                                          | SOK2          | YEL060C                 | PRB1          |
| YOR358W                                          | HAP5          | YML057W                 | CMP2          |
| YLR399C                                          | BDF1          | YNL225C                 | CNM67         |
| YBR215W                                          | HPC2          | YDL226C                 | GCS1          |
| YNL291C                                          | MID1          | YER162C                 | RAD4          |
| YOR304W                                          | ISW2          | YLR182W                 | SWI6          |
| YGL163C                                          | RAD54         | YNL225C                 | CNM67         |
| YPL115C                                          | BEM3          | YMR055C                 | BUB2          |
| YOR312C                                          | RPL20B        | YDR440W                 | DOT1          |
| YBR173C                                          | UMP1          | YNL076W                 | MKS1          |
| YKL116C                                          | PRR1          | YOR035C                 | SHE4          |
| YLR360W                                          | VPS38         | YHR013C                 | ARD1          |
| YBR107C                                          | IML3          | YHR200W                 | RPN10         |
| YLR337C                                          | VRP1          | YML115C                 | VAN1          |
| YBR173C                                          | UMP1          | YOL081W                 | IRA2          |
| YOR039W                                          | CKB2          | YDL006W                 | PTC1          |
| YDR144C                                          | MKC7          | YGL253W                 | HXK2          |
| YEL053C                                          | MAK10         | YDL083C                 | RPS16B        |
| YLR452C                                          | SST2          | YPR119W                 | CLB2          |
| YOR109W                                          | INP53         | YML071C                 | COG8          |
| YDL065C                                          | PEX19         | YPL112C                 | PEX25         |
| YBR200W                                          | BEM1          | YNL058C                 | YNL058C       |
| YOR127W                                          | RGA1          | YGL115W                 | SNF4          |
| YLR148W                                          | PEP3          | YDL077C                 | VAM6          |
| YNL291C                                          | MID1          | YKL101W                 | HSL1          |

| Predictions at threshold level 0.80 continued... |               |                         |               |
|--------------------------------------------------|---------------|-------------------------|---------------|
| Gene1 of predicted pair                          |               | Gene2 of predicted pair |               |
| Systematic Name                                  | Standard Name | Systematic Name         | Standard Name |
| YOR337W                                          | TEA1          | YFL023W                 | BUD27         |
| YER116C                                          | SLX8          | YPL256C                 | CLN2          |
| YAL024C                                          | LTE1          | YBR107C                 | IML3          |
| YGL200C                                          | EMP24         | YLR398C                 | SKI2          |
| YCL032W                                          | STE50         | YLR362W                 | STE11         |
| YDL006W                                          | PTC1          | YPL195W                 | APL5          |
| YPR131C                                          | NAT3          | YDR254W                 | CHL4          |
| YAL024C                                          | LTE1          | YNL032W                 | SIW14         |
| YLR090W                                          | XDJ1          | YER122C                 | GLO3          |
| YBL025W                                          | RRN10         | YEL060C                 | PRB1          |
| YJL006C                                          | CTK2          | YNL225C                 | CNM67         |
| YPR052C                                          | NHP6A         | YGL178W                 | MPT5          |
| YDR101C                                          | ARX1          | YER002W                 | NOP16         |
| YJL176C                                          | SWI3          | YBR289W                 | SNF5          |
| YER144C                                          | UBP5          | YLR452C                 | SST2          |
| YOR337W                                          | TEA1          | YKL139W                 | CTK1          |
| YDR261C                                          | EXG2          | YDR310C                 | SUM1          |
| YJL122W                                          | ALB1          | YHR052W                 | CIC1          |
| YLR094C                                          | GIS3          | YER162C                 | RAD4          |
| YCR086W                                          | CSM1          | YJR090C                 | GRR1          |
| YJL124C                                          | LSM1          | YDL226C                 | GCS1          |
| YLR102C                                          | APC9          | YDR363W-A               | SEM1          |
| YLR381W                                          | CTF3          | YBR107C                 | IML3          |
| YNL307C                                          | MCK1          | YER162C                 | RAD4          |
| YMR153W                                          | NUP53         | YOL081W                 | IRA2          |
| YDR137W                                          | RGP1          | YDR335W                 | MSN5          |
| YBR108W                                          | YBR108W       | YPR051W                 | MAK3          |
| YGR192C                                          | TDH3          | YPR119W                 | CLB2          |
| YMR142C                                          | RPL13B        | YHR039C-A               | VMA10         |

| Predictions at threshold level 0.80 continued... |               |                         |               |
|--------------------------------------------------|---------------|-------------------------|---------------|
| Gene1 of predicted pair                          |               | Gene2 of predicted pair |               |
| Systematic Name                                  | Standard Name | Systematic Name         | Standard Name |
| YLR192C                                          | HCR1          | YML001W                 | YPT7          |
| YLR095C                                          | IOC2          | YJL183W                 | MNN11         |
| YKL032C                                          | IXR1          | YKR048C                 | NAP1          |
| YML016C                                          | PPZ1          | YOR023C                 | AHC1          |
| YBR215W                                          | HPC2          | YDR363W-A               | SEM1          |
| YPR046W                                          | MCM16         | YER040W                 | GLN3          |
| YMR198W                                          | CIK1          | YML071C                 | COG8          |
| YNL307C                                          | MCK1          | YJL183W                 | MNN11         |
| YPR036W                                          | VMA13         | YDR137W                 | RGP1          |
| YJL128C                                          | PBS2          | YDL006W                 | PTC1          |
| YMR167W                                          | MLH1          | YLR350W                 | ORM2          |
| YPL253C                                          | VIK1          | YLR410W                 | VIP1          |
| YDR254W                                          | CHL4          | YJR090C                 | GRR1          |
| YBR020W                                          | GAL1          | YCL011C                 | GBP2          |
| YOL121C                                          | RPS19A        | YGL003C                 | CDH1          |
| YDR245W                                          | MNN10         | YOR038C                 | HIR2          |
| YBR217W                                          | ATG12         | YMR142C                 | RPL13B        |
| YDR443C                                          | SSN2          | YPL161C                 | BEM4          |
| YMR224C                                          | MRE11         | YMR038C                 | CCS1          |
| YGL124C                                          | MON1          | YJL190C                 | RPS22A        |
| YJR032W                                          | CPR7          | YFR036W                 | CDC26         |
| YGR184C                                          | UBR1          | YDR207C                 | UME6          |
| YPL024W                                          | RMI1          | YGL115W                 | SNF4          |
| YHR060W                                          | VMA22         | YDR358W                 | GGA1          |
| YHR200W                                          | RPN10         | YJR060W                 | CBF1          |
| YDL020C                                          | RPN4          | YNL106C                 | INP52         |
| YGL200C                                          | EMP24         | YPL161C                 | BEM4          |
| YFR031C-A                                        | RPL2A         | YMR004W                 | MVP1          |
| YER144C                                          | UBP5          | YOL121C                 | RPS19A        |

| Predictions at threshold level 0.80 continued... |               |                         |               |
|--------------------------------------------------|---------------|-------------------------|---------------|
| Gene1 of predicted pair                          |               | Gene2 of predicted pair |               |
| Systematic Name                                  | Standard Name | Systematic Name         | Standard Name |
| YGR108W                                          | CLB1          | YPR046W                 | MCM16         |
| YPL195W                                          | APL5          | YLR180W                 | SAM1          |
| YOR083W                                          | WHI5          | YNL107W                 | YAF9          |
| YLR061W                                          | RPL22A        | YKR014C                 | YPT52         |
| YGR020C                                          | VMA7          | YDL185W                 | TFP1          |
| YDR335W                                          | MSN5          | YOR368W                 | RAD17         |
| YPL253C                                          | VIK1          | YJR090C                 | GRR1          |
| YFL013C                                          | IES1          | YHR167W                 | THP2          |
| YNL206C                                          | RTT106        | YPL001W                 | HAT1          |
| YOR066W                                          | MSA1          | YDR207C                 | UME6          |
| YLR094C                                          | GIS3          | YHR081W                 | LRP1          |
| YIL076W                                          | SEC28         | YML115C                 | VAN1          |
| YPL022W                                          | RAD1          | YCR086W                 | CSM1          |
| YKL006W                                          | RPL14A        | YCR077C                 | PAT1          |
| YER143W                                          | DDI1          | YOR327C                 | SNC2          |
| YBR228W                                          | SLX1          | YGL175C                 | SAE2          |
| YLR079W                                          | SIC1          | YOL126C                 | MDH2          |
| YOR312C                                          | RPL20B        | YPR120C                 | CLB5          |
| YDL116W                                          | NUP84         | YJR060W                 | CBF1          |
| YNL291C                                          | MID1          | YCR086W                 | CSM1          |
| YPR018W                                          | RLF2          | YGL163C                 | RAD54         |
| YNL032W                                          | SIW14         | YNL076W                 | MKS1          |
| YKL007W                                          | CAP1          | YDR310C                 | SUM1          |
| YBR108W                                          | YBR108W       | YDR254W                 | CHL4          |
| YNL215W                                          | IES2          | YPL129W                 | TAF14         |
| YDR108W                                          | GSG1          | YEL042W                 | GDA1          |
| YOL151W                                          | GRE2          | YPR119W                 | CLB2          |
| YNL054W                                          | VAC7          | YLR410W                 | VIP1          |
| YKR061W                                          | KTR2          | YGL252C                 | RTG2          |

| Predictions at threshold level 0.80 continued... |               |                         |               |
|--------------------------------------------------|---------------|-------------------------|---------------|
| Gene1 of predicted pair                          |               | Gene2 of predicted pair |               |
| Systematic Name                                  | Standard Name | Systematic Name         | Standard Name |
| YER107C                                          | GLE2          | YKL057C                 | NUP120        |
| YFL026W                                          | STE2          | YNR006W                 | VPS27         |
| YPL024W                                          | RMI1          | YGR071C                 | YGR071C       |
| YOR101W                                          | RAS1          | YIL033C                 | BCY1          |
| YBL102W                                          | SFT2          | YEL043W                 | YEL043W       |
| YGL153W                                          | PEX14         | YLR370C                 | ARC18         |
| YOR023C                                          | AHC1          | YJL095W                 | BCK1          |
| YNL079C                                          | TPM1          | YJL183W                 | MNN11         |
| YFR031C-A                                        | RPL2A         | YMR142C                 | RPL13B        |
| YHR200W                                          | RPN10         | YDR310C                 | SUM1          |
| YLR399C                                          | BDF1          | YFR030W                 | MET10         |
| YLR148W                                          | PEP3          | YKR020W                 | VPS51         |
| YDR448W                                          | ADA2          | YGL025C                 | PGD1          |
| YNL054W                                          | VAC7          | YLR381W                 | CTF3          |
| YML016C                                          | PPZ1          | YJR032W                 | CPR7          |
| YGR019W                                          | UGA1          | YLR386W                 | VAC14         |
| YEL050C                                          | RML2          | YPL253C                 | VIK1          |
| YJL006C                                          | CTK2          | YDL226C                 | GCS1          |
| YHR012W                                          | VPS29         | YNL079C                 | TPM1          |
| YDL020C                                          | RPN4          | YMR231W                 | PEP5          |
| YOR083W                                          | WHI5          | YBR200W                 | BEM1          |
| YLR234W                                          | TOP3          | YDR076W                 | RAD55         |
| YBR173C                                          | UMP1          | YER144C                 | UBP5          |
| YBR030W                                          | YBR030W       | YBL103C                 | RTG3          |
| YHR084W                                          | STE12         | YLR441C                 | RPS1A         |
| YDR156W                                          | RPA14         | YML115C                 | VAN1          |
| YGL078C                                          | DBP3          | YLR370C                 | ARC18         |
| YFL013C                                          | IES1          | YKL160W                 | ELF1          |
| YLR386W                                          | VAC14         | YDR507C                 | GIN4          |

| Predictions at threshold level 0.80 continued... |               |                         |               |
|--------------------------------------------------|---------------|-------------------------|---------------|
| Gene1 of predicted pair                          |               | Gene2 of predicted pair |               |
| Systematic Name                                  | Standard Name | Systematic Name         | Standard Name |
| YBR258C                                          | SHG1          | YGL003C                 | CDH1          |
| YOR127W                                          | RGA1          | YCR086W                 | CSM1          |
| YMR224C                                          | MRE11         | YML102W                 | CAC2          |
| YGR252W                                          | GCN5          | YNL107W                 | YAF9          |
| YKR035W-A                                        | DID2          | YMR214W                 | SCJ1          |
| YLR386W                                          | VAC14         | YPL057C                 | SUR1          |
| YGL087C                                          | MMS2          | YBR107C                 | IML3          |
| YNL215W                                          | IES2          | YER118C                 | SHO1          |
| YOR109W                                          | INP53         | YGL124C                 | MON1          |
| YHR013C                                          | ARD1          | YGL252C                 | RTG2          |
| YDL020C                                          | RPN4          | YKR030W                 | GMH1          |
| YDR254W                                          | CHL4          | YML112W                 | CTK3          |
| YEL065W                                          | SIT1          | YGL066W                 | SGF73         |
| YNL068C                                          | FKH2          | YOR195W                 | SLK19         |
| YBR200W                                          | BEM1          | YDL077C                 | VAM6          |
| YOR195W                                          | SLK19         | YMR179W                 | SPT21         |
| YOR368W                                          | RAD17         | YLR350W                 | ORM2          |
| YOL051W                                          | GAL11         | YNL031C                 | HHT2          |
| YKL126W                                          | YPK1          | YLR370C                 | ARC18         |
| YNL325C                                          | FIG4          | YLR320W                 | MMS22         |
| YAL024C                                          | LTE1          | YFR031C-A               | RPL2A         |
| YPR046W                                          | MCM16         | YHL002W                 | HSE1          |
| YKL048C                                          | ELM1          | YIL008W                 | URM1          |
| YBL021C                                          | HAP3          | YMR055C                 | BUB2          |
| YOR275C                                          | RIM20         | YHR108W                 | GGA2          |
| YKL139W                                          | CTK1          | YNL058C                 | YNL058C       |
| YHL031C                                          | GOS1          | YGR270W                 | YTA7          |
| YDL020C                                          | RPN4          | YHR010W                 | RPL27A        |
| YLR119W                                          | SRN2          | YGL115W                 | SNF4          |

| Predictions at threshold level 0.80 continued... |               |                         |               |
|--------------------------------------------------|---------------|-------------------------|---------------|
| Gene1 of predicted pair                          |               | Gene2 of predicted pair |               |
| Systematic Name                                  | Standard Name | Systematic Name         | Standard Name |
| YOR156C                                          | NFI1          | YNL297C                 | MON2          |
| YCR088W                                          | ABP1          | YKL204W                 | EAP1          |
| YIL076W                                          | SEC28         | YEL043W                 | YEL043W       |
| YPR120C                                          | CLB5          | YIL103W                 | DPH1          |
| YPL129W                                          | TAF14         | YDR073W                 | SNF11         |
| YBR030W                                          | YBR030W       | YMR230W                 | RPS10B        |
| YDL155W                                          | CLB3          | YOL081W                 | IRA2          |
| YNL041C                                          | COG6          | YOR035C                 | SHE4          |
| YJL058C                                          | BIT61         | YPR119W                 | CLB2          |
| YMR152W                                          | YIM1          | YGL124C                 | MON1          |
| YAL014C                                          | SYN8          | YDR080W                 | VPS41         |
| YPR046W                                          | MCM16         | YGL003C                 | CDH1          |
| YPL022W                                          | RAD1          | YOL030W                 | GAS5          |
| YNL215W                                          | IES2          | YDR363W-A               | SEM1          |
| YJR040W                                          | GEF1          | YJR033C                 | RAV1          |
| YGL163C                                          | RAD54         | YJR135C                 | MCM22         |
| YLR109W                                          | AHP1          | YIL008W                 | URM1          |
| YDR439W                                          | LRS4          | YLR182W                 | SWI6          |
| YGR135W                                          | PRE9          | YPL089C                 | RLM1          |
| YOR023C                                          | AHC1          | YDL155W                 | CLB3          |
| YBL017C                                          | PEP1          | YJL029C                 | VPS53         |
| YLR435W                                          | TSR2          | YJL138C                 | TIF2          |
| YNL206C                                          | RTT106        | YGR188C                 | BUB1          |
| YDR293C                                          | SSD1          | YKL048C                 | ELM1          |
| YER044C                                          | ERG28         | YBR036C                 | CSG2          |
| YBR108W                                          | YBR108W       | YDL223C                 | HBT1          |
| YJL172W                                          | CPS1          | YPR036W                 | VMA13         |
| YGL147C                                          | RPL9A         | YPL137C                 | GIP3          |
| YPR018W                                          | RLF2          | YBR010W                 | HHT1          |



| Predictions at threshold level 0.80 continued... |               |                         |               |
|--------------------------------------------------|---------------|-------------------------|---------------|
| Gene1 of predicted pair                          |               | Gene2 of predicted pair |               |
| Systematic Name                                  | Standard Name | Systematic Name         | Standard Name |
| YKL006W                                          | RPL14A        | YGL200C                 | EMP24         |
| YPL140C                                          | MKK2          | YPR119W                 | CLB2          |
| YOR195W                                          | SLK19         | YPR046W                 | MCM16         |
| YMR172W                                          | HOT1          | YPR051W                 | MAK3          |
| YBR030W                                          | YBR030W       | YLR371W                 | ROM2          |
| YGL115W                                          | SNF4          | YJR032W                 | CPR7          |
| YHR178W                                          | STB5          | YLR447C                 | VMA6          |
| YNL201C                                          | PSY2          | YDR289C                 | RTT103        |
| YLR079W                                          | SIC1          | YOR080W                 | DIA2          |
| YNL307C                                          | MCK1          | YER040W                 | GLN3          |
| YDL116W                                          | NUP84         | YKR024C                 | DBP7          |
| YPR040W                                          | TIP41         | YDR309C                 | GIC2          |
| YGR239C                                          | PEX21         | YOL044W                 | PEX15         |
| YFL023W                                          | BUD27         | YMR311C                 | GLC8          |
| YGR209C                                          | TRX2          | YDR423C                 | CAD1          |
| YJR056C                                          | YJR056C       | YDL083C                 | RPS16B        |
| YPL115C                                          | BEM3          | YDR289C                 | RTT103        |
| YEL053C                                          | MAK10         | YPL120W                 | VPS30         |
| YDR318W                                          | MCM21         | YOL067C                 | RTG1          |
| YEL065W                                          | SIT1          | YLR192C                 | HCR1          |
| YPR052C                                          | NHP6A         | YIL038C                 | NOT3          |
| YNL288W                                          | CAF40         | YPR072W                 | NOT5          |
| YML103C                                          | NUP188        | YML057W                 | CMP2          |
| YNL025C                                          | SSN8          | YGR104C                 | SRB5          |
| YNL218W                                          | MGS1          | YNR052C                 | POP2          |
| YLL039C                                          | UBI4          | YKR020W                 | VPS51         |
| YPR084W                                          | YPR084W       | YML071C                 | COG8          |
| YGR105W                                          | VMA21         | YOR327C                 | SNC2          |
| YAR014C                                          | BUD14         | YGR188C                 | BUB1          |

| Predictions at threshold level 0.80 continued... |               |                         |               |
|--------------------------------------------------|---------------|-------------------------|---------------|
| Gene1 of predicted pair                          |               | Gene2 of predicted pair |               |
| Systematic Name                                  | Standard Name | Systematic Name         | Standard Name |
| YPR036W                                          | VMA13         | YOL111C                 | MDY2          |
| YDL116W                                          | NUP84         | YMR199W                 | CLN1          |
| YPL018W                                          | CTF19         | YJL183W                 | MNN11         |
| YBR030W                                          | YBR030W       | YLR093C                 | NYV1          |
| YMR199W                                          | CLN1          | YHR152W                 | SPO12         |
| YLR288C                                          | MEC3          | YDL013W                 | SLX5          |
| YOL111C                                          | MDY2          | YMR311C                 | GLC8          |
| YBL058W                                          | SHP1          | YDR207C                 | UME6          |
| YFR031C-A                                        | RPL2A         | YJR032W                 | CPR7          |
| YNR052C                                          | POP2          | YGR134W                 | CAF130        |
| YGL060W                                          | YBP2          | YGL115W                 | SNF4          |
| YGL033W                                          | HOP2          | YNL076W                 | MKS1          |
| YLL010C                                          | PSR1          | YOR043W                 | WHI2          |
| YDR289C                                          | RTT103        | YHR115C                 | DMA1          |
| YKL116C                                          | PRR1          | YNL307C                 | MCK1          |
| YOR358W                                          | HAP5          | YCR086W                 | CSM1          |
| YLR337C                                          | VRP1          | YJL176C                 | SWI3          |
| YDR137W                                          | RGP1          | YIR005W                 | IST3          |
| YDR245W                                          | MNN10         | YER049W                 | TPA1          |
| YHR060W                                          | VMA22         | YMR214W                 | SCJ1          |
| YJR040W                                          | GEF1          | YHR039C-A               | VMA10         |
| YGL212W                                          | VAM7          | YDR310C                 | SUM1          |
| YBR030W                                          | YBR030W       | YNL041C                 | COG6          |
| YBR019C                                          | GAL10         | YDR207C                 | UME6          |
| YHR039C-A                                        | VMA10         | YJL004C                 | SYS1          |
| YML115C                                          | VAN1          | YMR142C                 | RPL13B        |
| YBR171W                                          | SEC66         | YER122C                 | GLO3          |
| YDR264C                                          | AKR1          | YHR115C                 | DMA1          |
| YMR224C                                          | MRE11         | YCR066W                 | RAD18         |

| Predictions at threshold level 0.80 continued... |               |                         |               |
|--------------------------------------------------|---------------|-------------------------|---------------|
| Gene1 of predicted pair                          |               | Gene2 of predicted pair |               |
| Systematic Name                                  | Standard Name | Systematic Name         | Standard Name |
| YDR146C                                          | SWI5          | YLR371W                 | ROM2          |
| YLR441C                                          | RPS1A         | YER162C                 | RAD4          |
| YNL032W                                          | SIW14         | YEL053C                 | MAK10         |
| YML071C                                          | COG8          | YGL003C                 | CDH1          |
| YPL213W                                          | LEA1          | YGR135W                 | PRE9          |
| YBR194W                                          | SOY1          | YLR398C                 | SKI2          |
| YNR031C                                          | SSK2          | YCR073C                 | SSK22         |
| YIL076W                                          | SEC28         | YOR124C                 | UBP2          |
| YNL054W                                          | VAC7          | YGL163C                 | RAD54         |
| YMR202W                                          | ERG2          | YDL226C                 | GCS1          |
| YDR202C                                          | RAV2          | YGR105W                 | VMA21         |
| YPL057C                                          | SUR1          | YOR035C                 | SHE4          |
| YDR073W                                          | SNF11         | YKL109W                 | HAP4          |
| YDR378C                                          | LSM6          | YNL225C                 | CNM67         |
| YLR234W                                          | TOP3          | YNL135C                 | FPR1          |
| YBL051C                                          | PIN4          | YPR046W                 | MCM16         |
| YHL031C                                          | GOS1          | YMR216C                 | SKY1          |
| YDR171W                                          | HSP42         | YJR060W                 | CBF1          |
| YLR119W                                          | SRN2          | YJR056C                 | YJR056C       |
| YNL291C                                          | MID1          | YLR309C                 | IMH1          |
| YLR234W                                          | TOP3          | YLR313C                 | SPH1          |
| YFR010W                                          | UBP6          | YPR119W                 | CLB2          |
| YKR057W                                          | RPS21A        | YDL047W                 | SIT4          |
| YBL072C                                          | RPS8A         | YEL036C                 | ANP1          |
| YBR126C                                          | TPS1          | YMR109W                 | MYO5          |
| YER162C                                          | RAD4          | YAL002W                 | VPS8          |
| YKL025C                                          | PAN3          | YJL095W                 | BCK1          |
| YGR071C                                          | YGR071C       | YPL079W                 | RPL21B        |
| YMR004W                                          | MVP1          | YAR014C                 | BUD14         |

| Predictions at threshold level 0.80 continued... |               |                         |               |
|--------------------------------------------------|---------------|-------------------------|---------------|
| Gene1 of predicted pair                          |               | Gene2 of predicted pair |               |
| Systematic Name                                  | Standard Name | Systematic Name         | Standard Name |
| YER144C                                          | UBP5          | YJR056C                 | YJR056C       |
| YMR273C                                          | ZDS1          | YHL011C                 | PRS3          |
| YOR337W                                          | TEA1          | YML071C                 | COG8          |
| YLR061W                                          | RPL22A        | YML115C                 | VAN1          |
| YMR231W                                          | PEP5          | YPL256C                 | CLN2          |
| YNL291C                                          | MID1          | YKR001C                 | VPS1          |
| YML016C                                          | PPZ1          | YGL237C                 | HAP2          |
| YGL087C                                          | MMS2          | YJR090C                 | GRR1          |
| YPL253C                                          | VIK1          | YIR005W                 | IST3          |
| YNL243W                                          | SLA2          | YOR069W                 | VPS5          |
| YMR055C                                          | BUB2          | YEL053C                 | MAK10         |
| YOR109W                                          | INP53         | YOL108C                 | INO4          |
| YKL126W                                          | YPK1          | YOR327C                 | SNC2          |
| YHR134W                                          | WSS1          | YIL008W                 | URM1          |
| YML103C                                          | NUP188        | YJL124C                 | LSM1          |
| YGL223C                                          | COG1          | YCR066W                 | RAD18         |
| YNL243W                                          | SLA2          | YPR046W                 | MCM16         |
| YNL297C                                          | MON2          | YOR368W                 | RAD17         |
| YPL024W                                          | RMI1          | YBR195C                 | MSI1          |
| YML117W                                          | NAB6          | YDR245W                 | MNN10         |
| YGL174W                                          | BUD13         | YIR005W                 | IST3          |
| YDR484W                                          | VPS52         | YJR056C                 | YJR056C       |
| YFR010W                                          | UBP6          | YML001W                 | YPT7          |
| YJR060W                                          | CBF1          | YJR005W                 | APL1          |
| YDR484W                                          | VPS52         | YPR030W                 | CSR2          |
| YPL045W                                          | VPS16         | YDR323C                 | PEP7          |
| YLL039C                                          | UBI4          | YEL036C                 | ANP1          |
| YMR205C                                          | PFK2          | YBR082C                 | UBC4          |
| YMR039C                                          | SUB1          | YCR086W                 | CSM1          |

| Predictions at threshold level 0.80 continued... |               |                         |               |
|--------------------------------------------------|---------------|-------------------------|---------------|
| Gene1 of predicted pair                          |               | Gene2 of predicted pair |               |
| Systematic Name                                  | Standard Name | Systematic Name         | Standard Name |
| YDR439W                                          | LRS4          | YBR107C                 | IML3          |
| YNL236W                                          | SIN4          | YNL079C                 | TPM1          |
| YAL024C                                          | LTE1          | YER040W                 | GLN3          |
| YKL139W                                          | CTK1          | YMR153W                 | NUP53         |
| YKL025C                                          | PAN3          | YLR447C                 | VMA6          |
| YGL078C                                          | DBP3          | YML001W                 | YPT7          |
| YFR031C-A                                        | RPL2A         | YMR216C                 | SKY1          |
| YKR001C                                          | VPS1          | YNR032W                 | PPG1          |
| YBR057C                                          | MUM2          | YHR200W                 | RPN10         |
| YER110C                                          | KAP123        | YDR144C                 | MKC7          |
| YAL024C                                          | LTE1          | YIL103W                 | DPH1          |
| YER161C                                          | SPT2          | YOR308C                 | SNU66         |
| YOR127W                                          | RGA1          | YER120W                 | SCS2          |
| YMR201C                                          | RAD14         | YJR052W                 | RAD7          |
| YGL078C                                          | DBP3          | YDR137W                 | RGP1          |
| YDL160C                                          | DHH1          | YML109W                 | ZDS2          |
| YNL058C                                          | YNL058C       | YLR452C                 | SST2          |
| YOR337W                                          | TEA1          | YPL195W                 | APL5          |
| YJL124C                                          | LSM1          | YPL018W                 | CTF19         |
| YKR059W                                          | TIF1          | YCR031C                 | RPS14A        |
| YPL253C                                          | VIK1          | YBR260C                 | RGD1          |
| YDR363W-A                                        | SEM1          | YKL041W                 | VPS24         |
| YAL024C                                          | LTE1          | YDL184C                 | RPL41A        |
| YGR081C                                          | SLX9          | YDR076W                 | RAD55         |
| YLR357W                                          | RSC2          | YOR064C                 | YNG1          |
| YMR109W                                          | MYO5          | YOR035C                 | SHE4          |
| YPL161C                                          | BEM4          | YGR135W                 | PRE9          |
| YPL161C                                          | BEM4          | YHR114W                 | BZZ1          |
| YER044C                                          | ERG28         | YNL041C                 | COG6          |

| Predictions at threshold level 0.80 continued... |               |                         |               |
|--------------------------------------------------|---------------|-------------------------|---------------|
| Gene1 of predicted pair                          |               | Gene2 of predicted pair |               |
| Systematic Name                                  | Standard Name | Systematic Name         | Standard Name |
| YLR095C                                          | IOC2          | YDL077C                 | VAM6          |
| YLR398C                                          | SKI2          | YBR036C                 | CSG2          |
| YPL057C                                          | SUR1          | YLR180W                 | SAM1          |
| YOR080W                                          | DIA2          | YDR385W                 | EFT2          |
| YKL117W                                          | SBA1          | YPL256C                 | CLN2          |
| YDR443C                                          | SSN2          | YFL023W                 | BUD27         |
| YMR133W                                          | REC114        | YDR207C                 | UME6          |
| YDL020C                                          | RPN4          | YLR447C                 | VMA6          |
| YIL034C                                          | CAP2          | YNL107W                 | YAF9          |
| YCL001W                                          | RER1          | YAR014C                 | BUD14         |
| YJL172W                                          | CPS1          | YPL057C                 | SUR1          |
| YBR057C                                          | MUM2          | YMR089C                 | YTA12         |
| YHR060W                                          | VMA22         | YER040W                 | GLN3          |
| YGL178W                                          | MPT5          | YOL051W                 | GAL11         |
| YLR303W                                          | MET17         | YLR377C                 | FBP1          |
| YDL083C                                          | RPS16B        | YLR371W                 | ROM2          |
| YKR099W                                          | BAS1          | YHR200W                 | RPN10         |
| YPR029C                                          | APL4          | YPR119W                 | CLB2          |
| YPL129W                                          | TAF14         | YKL129C                 | MYO3          |
| YLR234W                                          | TOP3          | YNL107W                 | YAF9          |
| YML038C                                          | YMD8          | YNL051W                 | COG5          |
| YML103C                                          | NUP188        | YJR060W                 | CBF1          |
| YBR130C                                          | SHE3          | YKL185W                 | ASH1          |
| YPR036W                                          | VMA13         | YOL081W                 | IRA2          |
| YGR241C                                          | YAP1802       | YOR035C                 | SHE4          |
| YEL053C                                          | MAK10         | YDR310C                 | SUM1          |
| YDL020C                                          | RPN4          | YKL041W                 | VPS24         |
| YGL147C                                          | RPL9A         | YOR035C                 | SHE4          |
| YJL154C                                          | VPS35         | YKR001C                 | VPS1          |

| Predictions at threshold level 0.80 continued... |               |                         |               |
|--------------------------------------------------|---------------|-------------------------|---------------|
| Gene1 of predicted pair                          |               | Gene2 of predicted pair |               |
| Systematic Name                                  | Standard Name | Systematic Name         | Standard Name |
| YGL151W                                          | NUT1          | YGL148W                 | ARO2          |
| YLR148W                                          | PEP3          | YDR080W                 | VPS41         |
| YDR202C                                          | RAV2          | YDL006W                 | PTC1          |
| YMR142C                                          | RPL13B        | YER116C                 | SLX8          |
| YLR386W                                          | VAC14         | YLR452C                 | SST2          |
| YGL115W                                          | SNF4          | YOR035C                 | SHE4          |
| YKL139W                                          | CTK1          | YLR398C                 | SKI2          |
| YPR036W                                          | VMA13         | YER139C                 | YER139C       |
| YJL210W                                          | PEX2          | YGL153W                 | PEX14         |
| YFR024C-A                                        | LSB3          | YPL246C                 | RBD2          |
| YKR101W                                          | SIR1          | YMR273C                 | ZDS1          |
| YMR198W                                          | CIK1          | YDR200C                 | VPS64         |
| YIL159W                                          | BNR1          | YBR126C                 | TPS1          |
| YLR102C                                          | APC9          | YBR195C                 | MSI1          |
| YHR156C                                          | LIN1          | YPR046W                 | MCM16         |
| YER161C                                          | SPT2          | YCR086W                 | CSM1          |
| YBR270C                                          | BIT2          | YJL058C                 | BIT61         |
| YPR084W                                          | YPR084W       | YEL013W                 | VAC8          |
| YBR228W                                          | SLX1          | YNR052C                 | POP2          |
| YBR030W                                          | YBR030W       | YDL184C                 | RPL41A        |
| YDL127W                                          | PCL2          | YJL124C                 | LSM1          |
| YDR320C                                          | SWA2          | YPL195W                 | APL5          |
| YLR360W                                          | VPS38         | YIL008W                 | URM1          |
| YBL047C                                          | EDE1          | YDR440W                 | DOT1          |
| YNL087W                                          | TCB2          | YBR200W                 | BEM1          |
| YJL190C                                          | RPS22A        | YAR014C                 | BUD14         |
| YHR178W                                          | STB5          | YML115C                 | VAN1          |
| YDR425W                                          | SNX41         | YJL036W                 | SNX4          |
| YDR137W                                          | RGP1          | YLR452C                 | SST2          |

| Predictions at threshold level 0.80 continued... |               |                         |               |
|--------------------------------------------------|---------------|-------------------------|---------------|
| Gene1 of predicted pair                          |               | Gene2 of predicted pair |               |
| Systematic Name                                  | Standard Name | Systematic Name         | Standard Name |
| YOL111C                                          | MDY2          | YER139C                 | YER139C       |
| YLR288C                                          | MEC3          | YJR084W                 | CSN12         |
| YKL139W                                          | CTK1          | YNL107W                 | YAF9          |
| YNL079C                                          | TPM1          | YDR207C                 | UME6          |
| YGL223C                                          | COG1          | YJR060W                 | CBF1          |
| YMR016C                                          | SOK2          | YDR261C                 | EXG2          |
| YHL031C                                          | GOS1          | YJR032W                 | CPR7          |
| YGL066W                                          | SGF73         | YDR207C                 | UME6          |
| YML115C                                          | VAN1          | YHL002W                 | HSE1          |
| YDR379W                                          | RGA2          | YDR264C                 | AKR1          |
| YNL054W                                          | VAC7          | YOL054W                 | PSH1          |
| YJR033C                                          | RAV1          | YER122C                 | GLO3          |
| YCR077C                                          | PAT1          | YOL081W                 | IRA2          |
| YHR156C                                          | LIN1          | YDR310C                 | SUM1          |
| YJL124C                                          | LSM1          | YCR077C                 | PAT1          |
| YGR241C                                          | YAP1802       | YJL154C                 | VPS35         |
| YDR490C                                          | PKH1          | YPR119W                 | CLB2          |
| YBR200W                                          | BEM1          | YBR131W                 | CCZ1          |
| YGR184C                                          | UBR1          | YOR368W                 | RAD17         |
| YJR135C                                          | MCM22         | YML112W                 | CTK3          |
| YLR441C                                          | RPS1A         | YLR371W                 | ROM2          |
| YGL060W                                          | YBP2          | YNL107W                 | YAF9          |
| YPR131C                                          | NAT3          | YMR055C                 | BUB2          |
| YDR448W                                          | ADA2          | YIL038C                 | NOT3          |
| YDL184C                                          | RPL41A        | YBR019C                 | GAL10         |
| YPL037C                                          | EGD1          | YLR320W                 | MMS22         |
| YDR320C                                          | SWA2          | YGR020C                 | VMA7          |
| YOL082W                                          | ATG19         | YKL103C                 | LAP4          |
| YEL022W                                          | GEA2          | YER122C                 | GLO3          |



| Predictions at threshold level 0.80 continued... |               |                         |               |
|--------------------------------------------------|---------------|-------------------------|---------------|
| Gene1 of predicted pair                          |               | Gene2 of predicted pair |               |
| Systematic Name                                  | Standard Name | Systematic Name         | Standard Name |
| YJL089W                                          | SIP4          | YER027C                 | GAL83         |
| YAL010C                                          | MDM10         | YFR030W                 | MET10         |
| YNR052C                                          | POP2          | YOR368W                 | RAD17         |
| YKL139W                                          | CTK1          | YDL192W                 | ARF1          |
| YNL291C                                          | MID1          | YOR195W                 | SLK19         |
| YMR219W                                          | ESC1          | YPR119W                 | CLB2          |
| YKL139W                                          | CTK1          | YHR167W                 | THP2          |
| YCR077C                                          | PAT1          | YMR038C                 | CCS1          |
| YBR200W                                          | BEM1          | YBL087C                 | RPL23A        |
| YOR270C                                          | VPH1          | YOL111C                 | MDY2          |
| YDR448W                                          | ADA2          | YJL140W                 | RPB4          |
| YMR172W                                          | HOT1          | YGR188C                 | BUB1          |
| YPL024W                                          | RMI1          | YGL148W                 | ARO2          |
| YOR191W                                          | RIS1          | YJR140C                 | HIR3          |
| YBR215W                                          | HPC2          | YGR270W                 | YTA7          |
| YER162C                                          | RAD4          | YGL003C                 | CDH1          |
| YHL022C                                          | SPO11         | YGL003C                 | CDH1          |
| YNL243W                                          | SLA2          | YOL018C                 | TLG2          |
| YNL291C                                          | MID1          | YGL054C                 | ERV14         |
| YDR137W                                          | RGP1          | YPL195W                 | APL5          |
| YMR179W                                          | SPT21         | YDR378C                 | LSM6          |
| YBL027W                                          | RPL19B        | YMR055C                 | BUB2          |
| YOR112W                                          | CEX1          | YDR207C                 | UME6          |
| YMR026C                                          | PEX12         | YMR016C                 | SOK2          |
| YDR363W-A                                        | SEM1          | YJR135C                 | MCM22         |
| YOR132W                                          | VPS17         | YGL054C                 | ERV14         |
| YIL076W                                          | SEC28         | YNR072W                 | HXT17         |
| YLR079W                                          | SIC1          | YLR410W                 | VIP1          |
| YHR056C                                          | RSC30         | YLR200W                 | YKE2          |

| Predictions at threshold level 0.80 continued... |               |                         |               |
|--------------------------------------------------|---------------|-------------------------|---------------|
| Gene1 of predicted pair                          |               | Gene2 of predicted pair |               |
| Systematic Name                                  | Standard Name | Systematic Name         | Standard Name |
| YML117W                                          | NAB6          | YBR041W                 | FAT1          |
| YPL161C                                          | BEM4          | YHL020C                 | OPI1          |
| YLR095C                                          | IOC2          | YJR032W                 | CPR7          |
| YHR134W                                          | WSS1          | YBR108W                 | YBR108W       |
| YER162C                                          | RAD4          | YJL183W                 | MNN11         |
| YGL133W                                          | ITC1          | YMR199W                 | CLN1          |
| YGR135W                                          | PRE9          | YBR082C                 | UBC4          |
| YLR360W                                          | VPS38         | YPL045W                 | VPS16         |
| YMR055C                                          | BUB2          | YJL095W                 | BCK1          |
| YLR337C                                          | VRP1          | YIL130W                 | ASG1          |
| YGL212W                                          | VAM7          | YBL025W                 | RRN10         |
| YHR111W                                          | UBA4          | YPL152W                 | RRD2          |
| YOR195W                                          | SLK19         | YDR335W                 | MSN5          |
| YKL007W                                          | CAP1          | YIR003W                 | YIR003W       |
| YDR484W                                          | VPS52         | YKR020W                 | VPS51         |
| YNR072W                                          | HXT17         | YMR311C                 | GLC8          |
| YIL053W                                          | RHR2          | YKR035W-A               | DID2          |
| YDR378C                                          | LSM6          | YDL047W                 | SIT4          |
| YNL307C                                          | MCK1          | YDR363W-A               | SEM1          |
| YMR142C                                          | RPL13B        | YML071C                 | COG8          |
| YPL022W                                          | RAD1          | YHR200W                 | RPN10         |
| YDR261C                                          | EXG2          | YDL192W                 | ARF1          |
| YDR383C                                          | NKP1          | YCR086W                 | CSM1          |
| YCR065W                                          | HCM1          | YNL107W                 | YAF9          |
| YNL297C                                          | MON2          | YML028W                 | TSA1          |
| YGL133W                                          | ITC1          | YKR057W                 | RPS21A        |
| YFL023W                                          | BUD27         | YBR215W                 | HPC2          |
| YGR261C                                          | APL6          | YER120W                 | SCS2          |
| YGL115W                                          | SNF4          | YOL121C                 | RPS19A        |

| Predictions at threshold level 0.80 continued... |               |                         |               |
|--------------------------------------------------|---------------|-------------------------|---------------|
| Gene1 of predicted pair                          |               | Gene2 of predicted pair |               |
| Systematic Name                                  | Standard Name | Systematic Name         | Standard Name |
| YMR095C                                          | SNO1          | YLR371W                 | ROM2          |
| YPL195W                                          | APL5          | YJR033C                 | RAV1          |
| YJR135C                                          | MCM22         | YBR114W                 | RAD16         |
| YLR119W                                          | SRN2          | YPL195W                 | APL5          |
| YLL007C                                          | YLL007C       | YLR292C                 | SEC72         |
| YGL250W                                          | RMR1          | YOR368W                 | RAD17         |
| YJR040W                                          | GEF1          | YOL108C                 | INO4          |
| YFR031C-A                                        | RPL2A         | YNL238W                 | KEX2          |
| YDR202C                                          | RAV2          | YCL037C                 | SRO9          |
| YHR134W                                          | WSS1          | YJL190C                 | RPS22A        |
| YPL240C                                          | HSP82         | YER074W-A               | YOS1          |
| YKL048C                                          | ELM1          | YBR114W                 | RAD16         |
| YOR106W                                          | VAM3          | YKR001C                 | VPS1          |
| YBR084C-A                                        | RPL19A        | YNL116W                 | DMA2          |
| YFR010W                                          | UBP6          | YGL212W                 | VAM7          |
| YOR275C                                          | RIM20         | YPR173C                 | VPS4          |
| YER116C                                          | SLX8          | YOL090W                 | MSH2          |
| YCR031C                                          | RPS14A        | YOR368W                 | RAD17         |
| YFR010W                                          | UBP6          | YKL048C                 | ELM1          |
| YJL124C                                          | LSM1          | YCR086W                 | CSM1          |
| YFR010W                                          | UBP6          | YAR014C                 | BUD14         |
| YBR030W                                          | YBR030W       | YBR171W                 | SEC66         |
| YBL058W                                          | SHP1          | YML001W                 | YPT7          |
| YJR140C                                          | HIR3          | YOR039W                 | CKB2          |
| YPL057C                                          | SUR1          | YPL018W                 | CTF19         |
| YJL060W                                          | BNA3          | YLR370C                 | ARC18         |
| YGL003C                                          | CDH1          | YNL076W                 | MKS1          |
| YPR173C                                          | VPS4          | YOL018C                 | TLG2          |
| YGR108W                                          | CLB1          | YJL190C                 | RPS22A        |

| Predictions at threshold level 0.80 continued... |               |                         |               |
|--------------------------------------------------|---------------|-------------------------|---------------|
| Gene1 of predicted pair                          |               | Gene2 of predicted pair |               |
| Systematic Name                                  | Standard Name | Systematic Name         | Standard Name |
| YIL076W                                          | SEC28         | YCR066W                 | RAD18         |
| YNL087W                                          | TCB2          | YPL137C                 | GIP3          |
| YKR057W                                          | RPS21A        | YDR379W                 | RGA2          |
| YBL025W                                          | RRN10         | YDL077C                 | VAM6          |
| YDR245W                                          | MNN10         | YLR320W                 | MMS22         |
| YDR080W                                          | VPS41         | YER122C                 | GLO3          |
| YOR132W                                          | VPS17         | YPL253C                 | VIK1          |
| YNL243W                                          | SLA2          | YGR200C                 | ELP2          |
| YMR133W                                          | REC114        | YNL076W                 | MKS1          |
| YMR216C                                          | SKY1          | YML071C                 | COG8          |
| YPL057C                                          | SUR1          | YLR032W                 | RAD5          |
| YOR270C                                          | VPH1          | YFR036W                 | CDC26         |
| YJL004C                                          | SYS1          | YGL124C                 | MON1          |
| YDL116W                                          | NUP84         | YBR215W                 | HPC2          |
| YLR083C                                          | EMP70         | YCL001W                 | RER1          |
| YLR234W                                          | TOP3          | YJL124C                 | LSM1          |
| YDR335W                                          | MSN5          | YNL116W                 | DMA2          |
| YPR036W                                          | VMA13         | YOR035C                 | SHE4          |
| YGR040W                                          | KSS1          | YDR480W                 | DIG2          |
| YMR026C                                          | PEX12         | YGL115W                 | SNF4          |
| YPR131C                                          | NAT3          | YLR234W                 | TOP3          |
| YFR032C-A                                        | RPL29         | YBR041W                 | FAT1          |
| YLR119W                                          | SRN2          | YMR230W                 | RPS10B        |
| YKL032C                                          | IXR1          | YDR289C                 | RTT103        |
| YBL008W                                          | HIR1          | YPL001W                 | HAT1          |
| YIR005W                                          | IST3          | YIL103W                 | DPH1          |
| YPL234C                                          | TFP3          | YDR153C                 | ENT5          |
| YER174C                                          | GRX4          | YFR030W                 | MET10         |
| YEL044W                                          | IES6          | YEL036C                 | ANP1          |

| Predictions at threshold level 0.80 continued... |               |                         |               |
|--------------------------------------------------|---------------|-------------------------|---------------|
| Gene1 of predicted pair                          |               | Gene2 of predicted pair |               |
| Systematic Name                                  | Standard Name | Systematic Name         | Standard Name |
| YPL024W                                          | RMI1          | YGR249W                 | MGA1          |
| YCL001W                                          | RER1          | YEL051W                 | VMA8          |
| YMR092C                                          | AIP1          | YOR035C                 | SHE4          |
| YHR193C                                          | EGD2          | YPL037C                 | EGD1          |
| YDR245W                                          | MNN10         | YKL161C                 | YKL161C       |
| YMR016C                                          | SOK2          | YDR358W                 | GGA1          |
| YGR105W                                          | VMA21         | YDR207C                 | UME6          |
| YPL057C                                          | SUR1          | YDR254W                 | CHL4          |
| YNL206C                                          | RTT106        | YNL031C                 | HHT2          |
| YOR270C                                          | VPH1          | YJR056C                 | YJR056C       |
| YLR360W                                          | VPS38         | YPL253C                 | VIK1          |
| YJR040W                                          | GEF1          | YML038C                 | YMD8          |
| YDR477W                                          | SNF1          | YMR311C                 | GLC8          |
| YMR198W                                          | CIK1          | YGL161C                 | YIP5          |
| YEL044W                                          | IES6          | YOR312C                 | RPL20B        |
| YGR241C                                          | YAP1802       | YMR231W                 | PEP5          |
| YGR261C                                          | APL6          | YEL043W                 | YEL043W       |
| YML115C                                          | VAN1          | YDR245W                 | MNN10         |
| YJR032W                                          | CPR7          | YAR014C                 | BUD14         |
| YBR200W                                          | BEM1          | YPR040W                 | TIP41         |
| YHR178W                                          | STB5          | YMR109W                 | MYO5          |
| YLR150W                                          | STM1          | YPL018W                 | CTF19         |
| YDR244W                                          | PEX5          | YIL160C                 | POT1          |
| YMR026C                                          | PEX12         | YOR290C                 | SNF2          |
| YIL034C                                          | CAP2          | YLR337C                 | VRP1          |
| YER102W                                          | RPS8B         | YBL072C                 | RPS8A         |
| YLR248W                                          | RCK2          | YMR243C                 | ZRC1          |
| YDR153C                                          | ENT5          | YKR030W                 | GMH1          |
| YOL145C                                          | CTR9          | YGL003C                 | CDH1          |

| Predictions at threshold level 0.80 continued... |               |                         |               |
|--------------------------------------------------|---------------|-------------------------|---------------|
| Gene1 of predicted pair                          |               | Gene2 of predicted pair |               |
| Systematic Name                                  | Standard Name | Systematic Name         | Standard Name |
| YDR443C                                          | SSN2          | YPR046W                 | MCM16         |
| YJL154C                                          | VPS35         | YHR205W                 | SCH9          |
| YML028W                                          | TSA1          | YOR014W                 | RTS1          |
| YLR095C                                          | IOC2          | YKR099W                 | BAS1          |
| YFR031C-A                                        | RPL2A         | YML071C                 | COG8          |
| YGL087C                                          | MMS2          | YDR254W                 | CHL4          |
| YNL041C                                          | COG6          | YJR033C                 | RAV1          |
| YLR090W                                          | XDJ1          | YMR095C                 | SNO1          |
| YMR159C                                          | ATG16         | YPL149W                 | ATG5          |
| YNL079C                                          | TPM1          | YMR311C                 | GLC8          |
| YBR278W                                          | DPB3          | YEL056W                 | HAT2          |
| YKR014C                                          | YPT52         | YAL002W                 | VPS8          |
| YHR060W                                          | VMA22         | YMR152W                 | YIM1          |
| YDL116W                                          | NUP84         | YDR439W                 | LRS4          |
| YNL215W                                          | IES2          | YDR378C                 | LSM6          |
| YBR107C                                          | IML3          | YFR036W                 | CDC26         |
| YNL201C                                          | PSY2          | YOR195W                 | SLK19         |
| YHR013C                                          | ARD1          | YPL152W                 | RRD2          |
| YKL025C                                          | PAN3          | YJL190C                 | RPS22A        |
| YPL161C                                          | BEM4          | YGL003C                 | CDH1          |
| YKL139W                                          | CTK1          | YLR182W                 | SWI6          |
| YBR030W                                          | YBR030W       | YLR094C                 | GIS3          |
| YKL048C                                          | ELM1          | YJL183W                 | MNN11         |
| YOR106W                                          | VAM3          | YPL256C                 | CLN2          |
| YNL215W                                          | IES2          | YMR055C                 | BUB2          |
| YMR055C                                          | BUB2          | YJL183W                 | MNN11         |
| YJR059W                                          | PTK2          | YPL178W                 | CBC2          |
| YDR439W                                          | LRS4          | YFR036W                 | CDC26         |
| YKR072C                                          | SIS2          | YBL079W                 | NUP170        |

| Predictions at threshold level 0.80 continued... |               |                         |               |
|--------------------------------------------------|---------------|-------------------------|---------------|
| Gene1 of predicted pair                          |               | Gene2 of predicted pair |               |
| Systematic Name                                  | Standard Name | Systematic Name         | Standard Name |
| YMR016C                                          | SOK2          | YLR180W                 | SAM1          |
| YER139C                                          | YER139C       | YML097C                 | VPS9          |
| YJL154C                                          | VPS35         | YCR086W                 | CSM1          |
| YPL024W                                          | RMI1          | YOR038C                 | HIR2          |
| YOR127W                                          | RGA1          | YKL048C                 | ELM1          |
| YOR112W                                          | CEX1          | YEL043W                 | YEL043W       |
| YMR164C                                          | MSS11         | YGR059W                 | SPR3          |
| YJR140C                                          | HIR3          | YBR274W                 | CHK1          |
| YGL087C                                          | MMS2          | YCR086W                 | CSM1          |
| YDL083C                                          | RPS16B        | YPL195W                 | APL5          |
| YMR095C                                          | SNO1          | YER139C                 | YER139C       |
| YPR046W                                          | MCM16         | YBR114W                 | RAD16         |
| YIL159W                                          | BNR1          | YKR020W                 | VPS51         |
| YLR398C                                          | SKI2          | YDR310C                 | SUM1          |
| YMR224C                                          | MRE11         | YHR010W                 | RPL27A        |
| YBR127C                                          | VMA2          | YAL030W                 | SNC1          |
| YBL103C                                          | RTG3          | YMR133W                 | REC114        |
| YMR133W                                          | REC114        | YPL137C                 | GIP3          |
| YJL060W                                          | BNA3          | YJR005W                 | APL1          |
| YEL065W                                          | SIT1          | YDL223C                 | HBT1          |
| YKR035W-A                                        | DID2          | YGL115W                 | SNF4          |
| YLR370C                                          | ARC18         | YMR214W                 | SCJ1          |
| YOR115C                                          | TRS33         | YEL022W                 | GEA2          |
| YJL154C                                          | VPS35         | YDR108W                 | GSG1          |
| YOR127W                                          | RGA1          | YER162C                 | RAD4          |
| YFR010W                                          | UBP6          | YDR310C                 | SUM1          |
| YDR004W                                          | RAD57         | YOR368W                 | RAD17         |
| YBR108W                                          | YBR108W       | YLR441C                 | RPS1A         |
| YOR127W                                          | RGA1          | YGL031C                 | RPL24A        |

| Predictions at threshold level 0.80 continued... |               |                         |               |
|--------------------------------------------------|---------------|-------------------------|---------------|
| Gene1 of predicted pair                          |               | Gene2 of predicted pair |               |
| Systematic Name                                  | Standard Name | Systematic Name         | Standard Name |
| YDR293C                                          | SSD1          | YBR114W                 | RAD16         |
| YER116C                                          | SLX8          | YER122C                 | GLO3          |
| YPL240C                                          | HSP82         | YER180C-A               | SLO1          |
| YML103C                                          | NUP188        | YLR399C                 | BDF1          |
| YNL293W                                          | MSB3          | YPL256C                 | CLN2          |
| YBR171W                                          | SEC66         | YCL001W                 | RER1          |
| YNL069C                                          | RPL16B        | YML038C                 | YMD8          |
| YDL160C                                          | DHH1          | YMR273C                 | ZDS1          |
| YPR018W                                          | RLF2          | YBR057C                 | MUM2          |
| YBR217W                                          | ATG12         | YOL081W                 | IRA2          |
| YJR058C                                          | APS2          | YOR036W                 | PEP12         |
| YDL160C                                          | DHH1          | YDR071C                 | PAA1          |
| YOR043W                                          | WHI2          | YDR310C                 | SUM1          |
| YBR020W                                          | GAL1          | YPL248C                 | GAL4          |
| YGR249W                                          | MGA1          | YHR200W                 | RPN10         |
| YBR171W                                          | SEC66         | YHR108W                 | GGA2          |
| YNL236W                                          | SIN4          | YBR089C-A               | NHP6B         |
| YKL048C                                          | ELM1          | YPL018W                 | CTF19         |
| YBR217W                                          | ATG12         | YNL238W                 | KEX2          |
| YKL139W                                          | CTK1          | YOR035C                 | SHE4          |
| YOR023C                                          | AHC1          | YAL002W                 | VPS8          |
| YEL051W                                          | VMA8          | YOL108C                 | INO4          |
| YML001W                                          | YPT7          | YNR032W                 | PPG1          |
| YDL116W                                          | NUP84         | YMR224C                 | MRE11         |
| YOR337W                                          | TEA1          | YOL111C                 | MDY2          |
| YBL051C                                          | PIN4          | YAR014C                 | BUD14         |
| YOR032C                                          | HMS1          | YCR077C                 | PAT1          |
| YPL018W                                          | CTF19         | YOL054W                 | PSH1          |
| YPL256C                                          | CLN2          | YLR352W                 | YLR352W       |



| Predictions at threshold level 0.80 continued... |               |                         |               |
|--------------------------------------------------|---------------|-------------------------|---------------|
| Gene1 of predicted pair                          |               | Gene2 of predicted pair |               |
| Systematic Name                                  | Standard Name | Systematic Name         | Standard Name |
| YHR013C                                          | ARD1          | YNL236W                 | SIN4          |
| YLR399C                                          | BDF1          | YIR005W                 | IST3          |
| YDL184C                                          | RPL41A        | YNL238W                 | KEX2          |
| YJR024C                                          | MDE1          | YCR024C-A               | PMP1          |
| YDR108W                                          | GSG1          | YER162C                 | RAD4          |
| YKR001C                                          | VPS1          | YPL234C                 | TFP3          |
| YJR063W                                          | RPA12         | YBR010W                 | HHT1          |
| YGL212W                                          | VAM7          | YGL223C                 | COG1          |
| YGR270W                                          | YTA7          | YNL225C                 | CNM67         |
| YDR254W                                          | CHL4          | YPR120C                 | CLB5          |
| YHR200W                                          | RPN10         | YJR035W                 | RAD26         |
| YMR133W                                          | REC114        | YML001W                 | YPT7          |
| YKL117W                                          | SBA1          | YFL047W                 | RGD2          |
| YDR448W                                          | ADA2          | YBR289W                 | SNF5          |
| YLR418C                                          | CDC73         | YBR089C-A               | NHP6B         |
| YPL037C                                          | EGD1          | YMR133W                 | REC114        |
| YGL174W                                          | BUD13         | YLR182W                 | SWI6          |
| YML013W                                          | UBX2          | YBR283C                 | SSH1          |
| YLL039C                                          | UBI4          | YDL190C                 | UFD2          |
| YOR127W                                          | RGA1          | YMR055C                 | BUB2          |
| YDR183W                                          | PLP1          | YAR014C                 | BUD14         |
| YIL076W                                          | SEC28         | YNL076W                 | MKS1          |
| YGL147C                                          | RPL9A         | YEL060C                 | PRB1          |
| YBR173C                                          | UMP1          | YCR066W                 | RAD18         |
| YFR010W                                          | UBP6          | YGR184C                 | UBR1          |
| YJR032W                                          | CPR7          | YDR318W                 | MCM21         |
| YIL159W                                          | BNR1          | YDR358W                 | GGA1          |
| YML095C                                          | RAD10         | YKL048C                 | ELM1          |
| YBL103C                                          | RTG3          | YLR093C                 | NYV1          |

| Predictions at threshold level 0.80 continued... |               |                         |               |
|--------------------------------------------------|---------------|-------------------------|---------------|
| Gene1 of predicted pair                          |               | Gene2 of predicted pair |               |
| Systematic Name                                  | Standard Name | Systematic Name         | Standard Name |
| YHR134W                                          | WSS1          | YDR318W                 | MCM21         |
| YOR023C                                          | AHC1          | YJR090C                 | GRR1          |
| YCR066W                                          | RAD18         | YGL115W                 | SNF4          |
| YHR200W                                          | RPN10         | YOR327C                 | SNC2          |
| YOR195W                                          | SLK19         | YLR386W                 | VAC14         |
| YJL154C                                          | VPS35         | YNL079C                 | TPM1          |
| YDR171W                                          | HSP42         | YPR119W                 | CLB2          |
| YBR057C                                          | MUM2          | YLR370C                 | ARC18         |
| YBR107C                                          | IML3          | YLR370C                 | ARC18         |
| YBR215W                                          | HPC2          | YPR046W                 | MCM16         |
| YGL174W                                          | BUD13         | YAL002W                 | VPS8          |
| YER120W                                          | SCS2          | YAL002W                 | VPS8          |
| YLR320W                                          | MMS22         | YOL081W                 | IRA2          |
| YPR131C                                          | NAT3          | YOR080W                 | DIA2          |
| YFR024C-A                                        | LSB3          | YHR114W                 | BZZ1          |
| YPR051W                                          | MAK3          | YGR054W                 | YGR054W       |
| YLR135W                                          | SLX4          | YPL057C                 | SUR1          |
| YDR137W                                          | RGP1          | YLR370C                 | ARC18         |
| YBL047C                                          | EDE1          | YBR082C                 | UBC4          |
| YGL163C                                          | RAD54         | YCR077C                 | PAT1          |
| YJR135C                                          | MCM22         | YKL114C                 | APN1          |
| YGR129W                                          | SYF2          | YPL213W                 | LEA1          |
| YGL087C                                          | MMS2          | YPL018W                 | CTF19         |
| YEL043W                                          | YEL043W       | YDL077C                 | VAM6          |
| YDL020C                                          | RPN4          | YLR337C                 | VRP1          |
| YNL218W                                          | MGS1          | YOL030W                 | GAS5          |
| YLR386W                                          | VAC14         | YJL124C                 | LSM1          |
| YCR081W                                          | SRB8          | YPL256C                 | CLN2          |
| YDR156W                                          | RPA14         | YPL152W                 | RRD2          |

| Predictions at threshold level 0.80 continued... |               |                         |               |
|--------------------------------------------------|---------------|-------------------------|---------------|
| Gene1 of predicted pair                          |               | Gene2 of predicted pair |               |
| Systematic Name                                  | Standard Name | Systematic Name         | Standard Name |
| YJR135C                                          | MCM22         | YLR032W                 | RAD5          |
| YDL083C                                          | RPS16B        | YBR019C                 | GAL10         |
| YHR161C                                          | YAP1801       | YBL106C                 | SRO77         |
| YNL087W                                          | TCB2          | YBR171W                 | SEC66         |
| YER116C                                          | SLX8          | YJL183W                 | MNN11         |
| YDR146C                                          | SWI5          | YNL199C                 | GCR2          |
| YMR109W                                          | MYO5          | YGL124C                 | MON1          |
| YDR174W                                          | HMO1          | YDR318W                 | MCM21         |
| YHR200W                                          | RPN10         | YPL152W                 | RRD2          |
| YDR202C                                          | RAV2          | YPL234C                 | TFP3          |
| YOR270C                                          | VPH1          | YBR127C                 | VMA2          |
| YGL163C                                          | RAD54         | YNL107W                 | YAF9          |
| YPR141C                                          | KAR3          | YIL033C                 | BCY1          |
| YDR378C                                          | LSM6          | YPL152W                 | RRD2          |
| YNR072W                                          | HXT17         | YNL041C                 | COG6          |
| YJL176C                                          | SWI3          | YDR245W                 | MNN10         |
| YLR288C                                          | MEC3          | YCR066W                 | RAD18         |
| YMR004W                                          | MVP1          | YPR051W                 | MAK3          |
| YJR040W                                          | GEF1          | YLR309C                 | IMH1          |
| YKR020W                                          | VPS51         | YNL127W                 | FAR11         |
| YDR004W                                          | RAD57         | YNL076W                 | MKS1          |
| YMR246W                                          | FAA4          | YKL094W                 | YJU3          |
| YCR065W                                          | HCM1          | YGL003C                 | CDH1          |
| YBR200W                                          | BEM1          | YEL027W                 | CUP5          |
| YNL041C                                          | COG6          | YMR152W                 | YIM1          |
| YKL135C                                          | APL2          | YNR006W                 | VPS27         |
| YIL034C                                          | CAP2          | YDR293C                 | SSD1          |
| YDR225W                                          | HTA1          | YNL031C                 | HHT2          |
| YOR033C                                          | EXO1          | YPR131C                 | NAT3          |

| Predictions at threshold level 0.80 continued... |               |                         |               |
|--------------------------------------------------|---------------|-------------------------|---------------|
| Gene1 of predicted pair                          |               | Gene2 of predicted pair |               |
| Systematic Name                                  | Standard Name | Systematic Name         | Standard Name |
| YLR079W                                          | SIC1          | YPL246C                 | RBD2          |
| YKR095W                                          | MLP1          | YAL009W                 | SPO7          |
| YNL238W                                          | KEX2          | YEL051W                 | VMA8          |
| YHR108W                                          | GGA2          | YLR425W                 | TUS1          |
| YOR069W                                          | VPS5          | YDL192W                 | ARF1          |
| YML095C                                          | RAD10         | YBR107C                 | IML3          |
| YGL115W                                          | SNF4          | YCR053W                 | THR4          |
| YIL053W                                          | RHR2          | YLR452C                 | SST2          |
| YPL042C                                          | SSN3          | YIR005W                 | IST3          |
| YLR441C                                          | RPS1A         | YGL115W                 | SNF4          |
| YOR332W                                          | VMA4          | YIL002C                 | INP51         |
| YMR055C                                          | BUB2          | YDR171W                 | HSP42         |
| YOR080W                                          | DIA2          | YLR410W                 | VIP1          |
| YNL218W                                          | MGS1          | YLR410W                 | VIP1          |
| YKR020W                                          | VPS51         | YPR173C                 | VPS4          |
| YLL039C                                          | UBI4          | YKL006W                 | RPL14A        |
| YHR061C                                          | GIC1          | YBL085W                 | BOI1          |
| YLR093C                                          | NYV1          | YOL018C                 | TLG2          |
| YPR131C                                          | NAT3          | YGL163C                 | RAD54         |
| YDR245W                                          | MNN10         | YDL226C                 | GCS1          |
| YLR083C                                          | EMP70         | YCR066W                 | RAD18         |
| YKL110C                                          | KTI12         | YFR036W                 | CDC26         |
| YGR261C                                          | APL6          | YPL195W                 | APL5          |
| YOR127W                                          | RGA1          | YEL043W                 | YEL043W       |
| YPR036W                                          | VMA13         | YEL051W                 | VMA8          |
| YNL215W                                          | IES2          | YLR182W                 | SWI6          |
| YOR270C                                          | VPH1          | YHR081W                 | LRP1          |
| YGL066W                                          | SGF73         | YBR200W                 | BEM1          |
| YJR090C                                          | GRR1          | YOR368W                 | RAD17         |

| Predictions at threshold level 0.80 continued... |               |                         |               |
|--------------------------------------------------|---------------|-------------------------|---------------|
| Gene1 of predicted pair                          |               | Gene2 of predicted pair |               |
| Systematic Name                                  | Standard Name | Systematic Name         | Standard Name |
| YER144C                                          | UBP5          | YLR320W                 | MMS22         |
| YMR224C                                          | MRE11         | YDR295C                 | HDA2          |
| YKL048C                                          | ELM1          | YIL103W                 | DPH1          |
| YNL166C                                          | BNI5          | YJR090C                 | GRR1          |
| YDR469W                                          | SDC1          | YDR318W                 | MCM21         |
| YDR146C                                          | SWI5          | YEL056W                 | HAT2          |
| YBR173C                                          | UMP1          | YER040W                 | GLN3          |
| YDR156W                                          | RPA14         | YNL215W                 | IES2          |
| YOR195W                                          | SLK19         | YDR254W                 | CHL4          |
| YLR337C                                          | VRP1          | YPL018W                 | CTF19         |
| YGL087C                                          | MMS2          | YLR447C                 | VMA6          |
| YFR010W                                          | UBP6          | YOR043W                 | WHI2          |
| YMR116C                                          | ASC1          | YLR313C                 | SPH1          |
| YLR079W                                          | SIC1          | YGR059W                 | SPR3          |
| YFR010W                                          | UBP6          | YPL152W                 | RRD2          |
| YMR125W                                          | STO1          | YFL047W                 | RGD2          |
| YDR004W                                          | RAD57         | YPL001W                 | HAT1          |
| YJL176C                                          | SWI3          | YGL200C                 | EMP24         |
| YLR288C                                          | MEC3          | YLR032W                 | RAD5          |
| YNL199C                                          | GCR2          | YDR207C                 | UME6          |
| YKR020W                                          | VPS51         | YNL238W                 | KEX2          |
| YHR134W                                          | WSS1          | YLR447C                 | VMA6          |
| YKR099W                                          | BAS1          | YDR207C                 | UME6          |
| YHR119W                                          | SET1          | YOL145C                 | CTR9          |
| YOR066W                                          | MSA1          | YPL195W                 | APL5          |
| YDR443C                                          | SSN2          | YGR134W                 | CAF130        |
| YDR108W                                          | GSG1          | YGL054C                 | ERV14         |
| YGR108W                                          | CLB1          | YBR114W                 | RAD16         |
| YJL060W                                          | BNA3          | YPR119W                 | CLB2          |

| Predictions at threshold level 0.80 continued... |               |                         |               |
|--------------------------------------------------|---------------|-------------------------|---------------|
| Gene1 of predicted pair                          |               | Gene2 of predicted pair |               |
| Systematic Name                                  | Standard Name | Systematic Name         | Standard Name |
| YDR071C                                          | PAA1          | YDR469W                 | SDC1          |
| YLR386W                                          | VAC14         | YAR014C                 | BUD14         |
| YOR275C                                          | RIM20         | YLR371W                 | ROM2          |
| YPL057C                                          | SUR1          | YFR036W                 | CDC26         |
| YBR171W                                          | SEC66         | YLR180W                 | SAM1          |
| YBL051C                                          | PIN4          | YJL095W                 | BCK1          |
| YKR001C                                          | VPS1          | YAL002W                 | VPS8          |
| YOL110W                                          | SHR5          | YLR246W                 | ERF2          |
| YEL065W                                          | SIT1          | YPL195W                 | APL5          |
| YPL024W                                          | RMI1          | YPR046W                 | MCM16         |
| YMR198W                                          | CIK1          | YDR310C                 | SUM1          |
| YHR060W                                          | VMA22         | YNL238W                 | KEX2          |
| YCL037C                                          | SRO9          | YDR363W-A               | SEM1          |
| YGR184C                                          | UBR1          | YDR076W                 | RAD55         |
| YPR036W                                          | VMA13         | YBR171W                 | SEC66         |
| YLR452C                                          | SST2          | YMR152W                 | YIM1          |
| YPR051W                                          | MAK3          | YDR254W                 | CHL4          |
| YPR120C                                          | CLB5          | YPL018W                 | CTF19         |
| YDR156W                                          | RPA14         | YKL110C                 | KTI12         |
| YPL178W                                          | CBC2          | YMR273C                 | ZDS1          |
| YMR004W                                          | MVP1          | YDR153C                 | ENT5          |
| YNL325C                                          | FIG4          | YEL060C                 | PRB1          |
| YDR320C                                          | SWA2          | YDL137W                 | ARF2          |
| YER040W                                          | GLN3          | YMR230W                 | RPS10B        |
| YDR261C                                          | EXG2          | YJR032W                 | CPR7          |
| YDR443C                                          | SSN2          | YOR106W                 | VAM3          |
| YLL007C                                          | YLL007C       | YBL051C                 | PIN4          |
| YDR318W                                          | MCM21         | YDR183W                 | PLP1          |
| YOR033C                                          | EXO1          | YNR052C                 | POP2          |

| Predictions at threshold level 0.80 continued... |               |                         |               |
|--------------------------------------------------|---------------|-------------------------|---------------|
| Gene1 of predicted pair                          |               | Gene2 of predicted pair |               |
| Systematic Name                                  | Standard Name | Systematic Name         | Standard Name |
| YGR019W                                          | UGA1          | YOR023C                 | AHC1          |
| YIL036W                                          | CST6          | YGL200C                 | EMP24         |
| YER139C                                          | YER139C       | YLR182W                 | SWI6          |
| YDL083C                                          | RPS16B        | YER139C                 | YER139C       |
| YKR072C                                          | SIS2          | YDR207C                 | UME6          |
| YIL053W                                          | RHR2          | YPL024W                 | RMI1          |
| YGL163C                                          | RAD54         | YGL252C                 | RTG2          |
| YLR018C                                          | POM34         | YPL246C                 | RBD2          |
| YNL238W                                          | KEX2          | YPR046W                 | MCM16         |
| YML115C                                          | VAN1          | YKR020W                 | VPS51         |
| YMR198W                                          | CIK1          | YOR035C                 | SHE4          |
| YGL174W                                          | BUD13         | YNL041C                 | COG6          |
| YLR119W                                          | SRN2          | YLR386W                 | VAC14         |
| YPL045W                                          | VPS16         | YPR028W                 | YOP1          |
| YBR171W                                          | SEC66         | YNL293W                 | MSB3          |
| YLR320W                                          | MMS22         | YLR093C                 | NYV1          |
| YGL147C                                          | RPL9A         | YJR084W                 | CSN12         |
| YOR109W                                          | INP53         | YJL004C                 | SYS1          |
| YIL034C                                          | CAP2          | YJL183W                 | MNN11         |
| YMR276W                                          | DSK2          | YHR108W                 | GGA2          |
| YBR200W                                          | BEM1          | YNL248C                 | RPA49         |
| YER096W                                          | SHC1          | YMR311C                 | GLC8          |
| YDR363W-A                                        | SEM1          | YJL095W                 | BCK1          |
| YOR043W                                          | WHI2          | YEL056W                 | HAT2          |
| YMR026C                                          | PEX12         | YDR265W                 | PEX10         |
| YNL079C                                          | TPM1          | YBL072C                 | RPS8A         |
| YGL066W                                          | SGF73         | YNL236W                 | SIN4          |
| YOR033C                                          | EXO1          | YMR106C                 | YKU80         |
| YDR363W-A                                        | SEM1          | YKL213C                 | DOA1          |

| Predictions at threshold level 0.80 continued... |               |                         |               |
|--------------------------------------------------|---------------|-------------------------|---------------|
| Gene1 of predicted pair                          |               | Gene2 of predicted pair |               |
| Systematic Name                                  | Standard Name | Systematic Name         | Standard Name |
| YDR443C                                          | SSN2          | YER068W                 | MOT2          |
| YBL003C                                          | HTA2          | YBR009C                 | HHF1          |
| YER143W                                          | DDI1          | YDL047W                 | SIT4          |
| YJL183W                                          | MNN11         | YJL095W                 | BCK1          |
| YDR245W                                          | MNN10         | YDR378C                 | LSM6          |
| YKR099W                                          | BAS1          | YER122C                 | GLO3          |
| YMR127C                                          | SAS2          | YML102W                 | CAC2          |
| YKL048C                                          | ELM1          | YIL038C                 | NOT3          |
| YDL002C                                          | NHP10         | YPL057C                 | SUR1          |
| YLR079W                                          | SIC1          | YKR001C                 | VPS1          |
| YBR111W-A                                        | SUS1          | YLR055C                 | SPT8          |
| YNL106C                                          | INP52         | YJL004C                 | SYS1          |
| YBL047C                                          | EDE1          | YKL101W                 | HSL1          |
| YLR119W                                          | SRN2          | YFR036W                 | CDC26         |
| YDR383C                                          | NKP1          | YIL103W                 | DPH1          |
| YDR261C                                          | EXG2          | YOR327C                 | SNC2          |
| YER162C                                          | RAD4          | YOL121C                 | RPS19A        |
| YEL065W                                          | SIT1          | YDL184C                 | RPL41A        |
| YLR324W                                          | PEX30         | YBR168W                 | PEX32         |
| YMR202W                                          | ERG2          | YMR055C                 | BUB2          |
| YOL111C                                          | MDY2          | YNL076W                 | MKS1          |
| YNL325C                                          | FIG4          | YNL076W                 | MKS1          |
| YOR080W                                          | DIA2          | YDR358W                 | GGA1          |
| YDL184C                                          | RPL41A        | YCR053W                 | THR4          |
| YFR031C-A                                        | RPL2A         | YOR290C                 | SNF2          |
| YJR099W                                          | YUH1          | YNR006W                 | VPS27         |
| YPL259C                                          | APM1          | YAL030W                 | SNC1          |
| YHR134W                                          | WSS1          | YDR289C                 | RTT103        |
| YLR083C                                          | EMP70         | YJL036W                 | SNX4          |



| Predictions at threshold level 0.80 continued... |               |                         |               |
|--------------------------------------------------|---------------|-------------------------|---------------|
| Gene1 of predicted pair                          |               | Gene2 of predicted pair |               |
| Systematic Name                                  | Standard Name | Systematic Name         | Standard Name |
| YPL086C                                          | ELP3          | YBR089C-A               | NHP6B         |
| YMR016C                                          | SOK2          | YML071C                 | COG8          |
| YPL253C                                          | VIK1          | YDR207C                 | UME6          |
| YPL115C                                          | BEM3          | YGL151W                 | NUT1          |
| YMR153W                                          | NUP53         | YLR452C                 | SST2          |
| YMR116C                                          | ASC1          | YML028W                 | TSA1          |
| YLR452C                                          | SST2          | YLR182W                 | SWI6          |
| YNL106C                                          | INP52         | YKL139W                 | CTK1          |
| YBR171W                                          | SEC66         | YLR452C                 | SST2          |
| YLR135W                                          | SLX4          | YJL124C                 | LSM1          |
| YLL022C                                          | HIF1          | YEL056W                 | HAT2          |
| YML028W                                          | TSA1          | YGL031C                 | RPL24A        |
| YML016C                                          | PPZ1          | YGL019W                 | CKB1          |
| YGR270W                                          | YTA7          | YML112W                 | CTK3          |
| YNL288W                                          | CAF40         | YGL124C                 | MON1          |
| YHR152W                                          | SPO12         | YGR135W                 | PRE9          |
| YPR072W                                          | NOT5          | YPL203W                 | TPK2          |
| YOR127W                                          | RGA1          | YLR447C                 | VMA6          |
| YBL102W                                          | SFT2          | YOL018C                 | TLG2          |
| YDL006W                                          | PTC1          | YPL259C                 | APM1          |
| YLR102C                                          | APC9          | YBR200W                 | BEM1          |
| YLR452C                                          | SST2          | YJL095W                 | BCK1          |
| YOR059C                                          | YOR059C       | YKR046C                 | PET10         |
| YAL055W                                          | PEX22         | YLR131C                 | ACE2          |
| YLR410W                                          | VIP1          | YOL054W                 | PSH1          |
| YOR008C                                          | SLG1          | YER096W                 | SHC1          |
| YOR059C                                          | YOR059C       | YKL140W                 | TGL1          |
| YDR293C                                          | SSD1          | YDR389W                 | SAC7          |
| YJL138C                                          | TIF2          | YKL101W                 | HSL1          |

| Predictions at threshold level 0.80 continued... |               |                         |               |
|--------------------------------------------------|---------------|-------------------------|---------------|
| Gene1 of predicted pair                          |               | Gene2 of predicted pair |               |
| Systematic Name                                  | Standard Name | Systematic Name         | Standard Name |
| YPL042C                                          | SSN3          | YLR381W                 | CTF3          |
| YIL034C                                          | CAP2          | YGR019W                 | UGA1          |
| YDR217C                                          | RAD9          | YGL190C                 | CDC55         |
| YOR368W                                          | RAD17         | YNL082W                 | PMS1          |
| YNL054W                                          | VAC7          | YPL018W                 | CTF19         |
| YJR056C                                          | YJR056C       | YKR035W-A               | DID2          |
| YLR371W                                          | ROM2          | YPL089C                 | RLM1          |
| YMR312W                                          | ELP6          | YHR187W                 | IKI1          |
| YFR010W                                          | UBP6          | YNL041C                 | COG6          |
| YBR108W                                          | YBR108W       | YLR398C                 | SKI2          |
| YMR198W                                          | CIK1          | YMR109W                 | MYO5          |
| YOR312C                                          | RPL20B        | YFR036W                 | CDC26         |
| YAL024C                                          | LTE1          | YBR171W                 | SEC66         |
| YPR030W                                          | CSR2          | YBR280C                 | SAF1          |
| YBR200W                                          | BEM1          | YKL041W                 | VPS24         |
| YJL053W                                          | PEP8          | YER162C                 | RAD4          |
| YDR244W                                          | PEX5          | YDL065C                 | PEX19         |
| YNL199C                                          | GCR2          | YKL160W                 | ELF1          |
| YLR292C                                          | SEC72         | YLR301W                 | YLR301W       |
| YGL124C                                          | MON1          | YDL077C                 | VAM6          |
| YDR202C                                          | RAV2          | YER122C                 | GLO3          |
| YOL067C                                          | RTG1          | YAL002W                 | VPS8          |
| YKL139W                                          | CTK1          | YER122C                 | GLO3          |
| YBR200W                                          | BEM1          | YLR180W                 | SAM1          |
| YJR060W                                          | CBF1          | YIL103W                 | DPH1          |
| YER114C                                          | BOI2          | YNL307C                 | MCK1          |
| YOR290C                                          | SNF2          | YLR410W                 | VIP1          |
| YFR031C-A                                        | RPL2A         | YDL077C                 | VAM6          |
| YMR039C                                          | SUB1          | YLR452C                 | SST2          |

| Predictions at threshold level 0.80 continued... |               |                         |               |
|--------------------------------------------------|---------------|-------------------------|---------------|
| Gene1 of predicted pair                          |               | Gene2 of predicted pair |               |
| Systematic Name                                  | Standard Name | Systematic Name         | Standard Name |
| YBL102W                                          | SFT2          | YGL115W                 | SNF4          |
| YDR363W-A                                        | SEM1          | YDR440W                 | DOT1          |
| YIL053W                                          | RHR2          | YHR060W                 | VMA22         |
| YFR031C-A                                        | RPL2A         | YGR249W                 | MGA1          |
| YDR293C                                          | SSD1          | YHR111W                 | UBA4          |
| YNL054W                                          | VAC7          | YDR254W                 | CHL4          |
| YDR385W                                          | EFT2          | YAL055W                 | PEX22         |
| YPL120W                                          | VPS30         | YJR033C                 | RAV1          |
| YAL024C                                          | LTE1          | YNL307C                 | MCK1          |
| YBR107C                                          | IML3          | YGL124C                 | MON1          |
| YMR224C                                          | MRE11         | YMR016C                 | SOK2          |
| YML109W                                          | ZDS2          | YNL031C                 | HHT2          |
| YOL043C                                          | NTG2          | YCR066W                 | RAD18         |
| YHR060W                                          | VMA22         | YPR032W                 | SRO7          |
| YIL076W                                          | SEC28         | YKL048C                 | ELM1          |
| YLR386W                                          | VAC14         | YOR358W                 | HAP5          |
| YJR060W                                          | CBF1          | YGL003C                 | CDH1          |
| YJL004C                                          | SYS1          | YDL226C                 | GCS1          |
| YNL032W                                          | SIW14         | YBR019C                 | GAL10         |
| YBL008W                                          | HIR1          | YMR055C                 | BUB2          |
| YKR072C                                          | SIS2          | YOR043W                 | WHI2          |
| YGL190C                                          | CDC55         | YDR422C                 | SIP1          |
| YEL065W                                          | SIT1          | YGL078C                 | DBP3          |
| YBL088C                                          | TEL1          | YIL038C                 | NOT3          |
| YOR275C                                          | RIM20         | YDL047W                 | SIT4          |
| YOR290C                                          | SNF2          | YBR010W                 | HHT1          |
| YOR023C                                          | AHC1          | YPL253C                 | VIK1          |
| YML001W                                          | YPT7          | YNL041C                 | COG6          |
| YMR224C                                          | MRE11         | YIL103W                 | DPH1          |

| Predictions at threshold level 0.80 continued... |               |                         |               |
|--------------------------------------------------|---------------|-------------------------|---------------|
| Gene1 of predicted pair                          |               | Gene2 of predicted pair |               |
| Systematic Name                                  | Standard Name | Systematic Name         | Standard Name |
| YJL036W                                          | SNX4          | YLR309C                 | IMH1          |
| YLL007C                                          | YLL007C       | YEL056W                 | HAT2          |
| YBL021C                                          | HAP3          | YMR109W                 | MYO5          |
| YBR057C                                          | MUM2          | YBL072C                 | RPS8A         |
| YBL103C                                          | RTG3          | YMR214W                 | SCJ1          |
| YER144C                                          | UBP5          | YPR046W                 | MCM16         |
| YOR080W                                          | DIA2          | YEL013W                 | VAC8          |
| YPL161C                                          | BEM4          | YPR030W                 | CSR2          |
| YHR013C                                          | ARD1          | YIL103W                 | DPH1          |
| YPR052C                                          | NHP6A         | YKL160W                 | ELF1          |
| YGR249W                                          | MGA1          | YJR056C                 | YJR056C       |
| YAL024C                                          | LTE1          | YGL066W                 | SGF73         |
| YPR036W                                          | VMA13         | YLR094C                 | GIS3          |
| YPR120C                                          | CLB5          | YDL047W                 | SIT4          |
| YJL124C                                          | LSM1          | YDR254W                 | CHL4          |
| YCR084C                                          | TUP1          | YNL167C                 | SKO1          |
| YBL079W                                          | NUP170        | YJL187C                 | SWE1          |
| YHR161C                                          | YAP1801       | YDL161W                 | ENT1          |
| YKL048C                                          | ELM1          | YPR046W                 | MCM16         |
| YAL051W                                          | OAF1          | YDR310C                 | SUM1          |
| YDR245W                                          | MNN10         | YLR370C                 | ARC18         |
| YGR261C                                          | APL6          | YDR108W                 | GSG1          |
| YOL145C                                          | CTR9          | YDR071C                 | PAA1          |
| YOL111C                                          | MDY2          | YPL195W                 | APL5          |
| YMR153W                                          | NUP53         | YKL126W                 | YPK1          |
| YIL076W                                          | SEC28         | YDR207C                 | UME6          |
| YMR199W                                          | CLN1          | YLR182W                 | SWI6          |
| YLR386W                                          | VAC14         | YHL002W                 | HSE1          |
| YBR173C                                          | UMP1          | YER162C                 | RAD4          |

| Predictions at threshold level 0.80 continued... |               |                         |               |
|--------------------------------------------------|---------------|-------------------------|---------------|
| Gene1 of predicted pair                          |               | Gene2 of predicted pair |               |
| Systematic Name                                  | Standard Name | Systematic Name         | Standard Name |
| YDR443C                                          | SSN2          | YDR207C                 | UME6          |
| YBR200W                                          | BEM1          | YKL114C                 | APN1          |
| YGR104C                                          | SRB5          | YDL005C                 | MED2          |
| YKL139W                                          | CTK1          | YDL223C                 | HBT1          |
| YFR010W                                          | UBP6          | YLR398C                 | SKI2          |
| YLR309C                                          | IMH1          | YER122C                 | GLO3          |
| YLR083C                                          | EMP70         | YNL051W                 | COG5          |
| YNR072W                                          | HXT17         | YML071C                 | COG8          |
| YHR012W                                          | VPS29         | YDL006W                 | PTC1          |
| YOR109W                                          | INP53         | YGL115W                 | SNF4          |
| YMR179W                                          | SPT21         | YLR381W                 | CTF3          |
| YDL192W                                          | ARF1          | YDR207C                 | UME6          |
| YHR200W                                          | RPN10         | YER139C                 | YER139C       |
| YBL052C                                          | SAS3          | YBR089C-A               | NHP6B         |
| YDR448W                                          | ADA2          | YKL109W                 | HAP4          |
| YOR109W                                          | INP53         | YAL030W                 | SNC1          |
| YLR079W                                          | SIC1          | YMR153W                 | NUP53         |
| YPL096C-A                                        | ERI1          | YMR089C                 | YTA12         |
| YJL138C                                          | TIF2          | YCR031C                 | RPS14A        |
| YKL139W                                          | CTK1          | YER139C                 | YER139C       |
| YNL058C                                          | YNL058C       | YNL076W                 | MKS1          |
| YDL020C                                          | RPN4          | YML016C                 | PPZ1          |
| YMR284W                                          | YKU70         | YOL090W                 | MSH2          |
| YDL155W                                          | CLB3          | YGR188C                 | BUB1          |
| YDR448W                                          | ADA2          | YOL148C                 | SPT20         |
| YGL003C                                          | CDH1          | YNL107W                 | YAF9          |
| YKL025C                                          | PAN3          | YKL114C                 | APN1          |
| YBL085W                                          | BOI1          | YER158C                 | YER158C       |
| YJL124C                                          | LSM1          | YJL187C                 | SWE1          |

| Predictions at threshold level 0.80 continued... |               |                         |               |
|--------------------------------------------------|---------------|-------------------------|---------------|
| Gene1 of predicted pair                          |               | Gene2 of predicted pair |               |
| Systematic Name                                  | Standard Name | Systematic Name         | Standard Name |
| YBR200W                                          | BEM1          | YNL199C                 | GCR2          |
| YHR152W                                          | SPO12         | YDR264C                 | AKR1          |
| YPR046W                                          | MCM16         | YER139C                 | YER139C       |
| YBR290W                                          | BSD2          | YLR360W                 | VPS38         |
| YNR052C                                          | POP2          | YDR439W                 | LRS4          |
| YOR127W                                          | RGA1          | YKL101W                 | HSL1          |
| YPL096C-A                                        | ERI1          | YKL079W                 | SMY1          |
| YJL029C                                          | VPS53         | YPL045W                 | VPS16         |
| YIL008W                                          | URM1          | YEL056W                 | HAT2          |
| YGR184C                                          | UBR1          | YLR219W                 | MSC3          |
| YLR095C                                          | IOC2          | YLR441C                 | RPS1A         |
| YPL057C                                          | SUR1          | YDR363W-A               | SEM1          |
| YOR109W                                          | INP53         | YPL259C                 | APM1          |
| YDR156W                                          | RPA14         | YCR077C                 | PAT1          |
| YLR006C                                          | SSK1          | YHR111W                 | UBA4          |
| YMR198W                                          | CIK1          | YMR089C                 | YTA12         |
| YDR245W                                          | MNN10         | YBR260C                 | RGD1          |
| YBR111W-A                                        | SUS1          | YGR252W                 | GCN5          |
| YAL024C                                          | LTE1          | YJR135C                 | MCM22         |
| YGR135W                                          | PRE9          | YBL072C                 | RPS8A         |
| YDR080W                                          | VPS41         | YOL018C                 | TLG2          |
| YJL183W                                          | MNN11         | YNL107W                 | YAF9          |
| YBR200W                                          | BEM1          | YPL037C                 | EGD1          |
| YKL116C                                          | PRR1          | YNL087W                 | TCB2          |
| YLR381W                                          | CTF3          | YPR051W                 | MAK3          |
| YGL003C                                          | CDH1          | YOR035C                 | SHE4          |
| YKL139W                                          | CTK1          | YNL041C                 | COG6          |
| YOR290C                                          | SNF2          | YBL025W                 | RRN10         |
| YFR021W                                          | ATG18         | YLR094C                 | GIS3          |

| Predictions at threshold level 0.80 continued... |               |                         |               |
|--------------------------------------------------|---------------|-------------------------|---------------|
| Gene1 of predicted pair                          |               | Gene2 of predicted pair |               |
| Systematic Name                                  | Standard Name | Systematic Name         | Standard Name |
| YDL127W                                          | PCL2          | YGL161C                 | YIP5          |
| YDR156W                                          | RPA14         | YIL103W                 | DPH1          |
| YFR031C-A                                        | RPL2A         | YOL121C                 | RPS19A        |
| YKL101W                                          | HSL1          | YBL087C                 | RPL23A        |
| YJL053W                                          | PEP8          | YGL115W                 | SNF4          |
| YPR101W                                          | SNT309        | YDR163W                 | CWC15         |
| YPR018W                                          | RLF2          | YDR004W                 | RAD57         |
| YHR060W                                          | VMA22         | YOL018C                 | TLG2          |
| YOR109W                                          | INP53         | YHR060W                 | VMA22         |
| YOR140W                                          | SFL1          | YOR014W                 | RTS1          |
| YER116C                                          | SLX8          | YER162C                 | RAD4          |
| YDR439W                                          | LRS4          | YOL054W                 | PSH1          |
| YDR293C                                          | SSD1          | YDR155C                 | CPR1          |
| YML117W                                          | NAB6          | YPL161C                 | BEM4          |
| YLR320W                                          | MMS22         | YBR036C                 | CSG2          |
| YFR032C-A                                        | RPL29         | YMR038C                 | CCS1          |
| YOR195W                                          | SLK19         | YMR038C                 | CCS1          |
| YPL120W                                          | VPS30         | YDR310C                 | SUM1          |
| YML062C                                          | MFT1          | YMR273C                 | ZDS1          |
| YJL124C                                          | LSM1          | YNL307C                 | MCK1          |
| YGR270W                                          | YTA7          | YHR114W                 | BZZ1          |
| YAL024C                                          | LTE1          | YGL115W                 | SNF4          |
| YHR108W                                          | GGA2          | YMR038C                 | CCS1          |
| YMR153W                                          | NUP53         | YPL195W                 | APL5          |
| YDR142C                                          | PEX7          | YGL205W                 | POX1          |
| YER044C                                          | ERG28         | YNL238W                 | KEX2          |
| YLR360W                                          | VPS38         | YML001W                 | YPT7          |
| YDR129C                                          | SAC6          | YHL002W                 | HSE1          |
| YGL078C                                          | DBP3          | YKL139W                 | CTK1          |

| Predictions at threshold level 0.80 continued... |               |                         |               |
|--------------------------------------------------|---------------|-------------------------|---------------|
| Gene1 of predicted pair                          |               | Gene2 of predicted pair |               |
| Systematic Name                                  | Standard Name | Systematic Name         | Standard Name |
| YML001W                                          | YPT7          | YHR081W                 | LRP1          |
| YPR046W                                          | MCM16         | YJR090C                 | GRR1          |
| YIR003W                                          | YIR003W       | YMR109W                 | MYO5          |
| YNL325C                                          | FIG4          | YMR230W                 | RPS10B        |
| YLR410W                                          | VIP1          | YGL003C                 | CDH1          |
| YFR031C-A                                        | RPL2A         | YGL003C                 | CDH1          |
| YJL136C                                          | RPS21B        | YGL031C                 | RPL24A        |
| YLR083C                                          | EMP70         | YBL102W                 | SFT2          |
| YHR134W                                          | WSS1          | YDR207C                 | UME6          |
| YMR231W                                          | PEP5          | YDR207C                 | UME6          |
| YHR073W                                          | OSH3          | YKL117W                 | SBA1          |
| YLR216C                                          | CPR6          | YDR318W                 | MCM21         |
| YBR278W                                          | DPB3          | YHR039C-A               | VMA10         |
| YDL223C                                          | HBT1          | YGL200C                 | EMP24         |
| YCL037C                                          | SRO9          | YGR270W                 | YTA7          |
| YIL071C                                          | PCI8          | YKR026C                 | GCN3          |
| YMR095C                                          | SNO1          | YBL103C                 | RTG3          |
| YBL003C                                          | HTA2          | YKR048C                 | NAP1          |
| YDR383C                                          | NKP1          | YNL107W                 | YAF9          |
| YDR363W-A                                        | SEM1          | YOR368W                 | RAD17         |
| YJL053W                                          | PEP8          | YMR004W                 | MVP1          |
| YDR378C                                          | LSM6          | YLR182W                 | SWI6          |
| YDL232W                                          | OST4          | YJR010C-A               | SPC1          |
| YBL008W                                          | HIR1          | YJL140W                 | RPB4          |
| YMR089C                                          | YTA12         | YDR207C                 | UME6          |
| YBR194W                                          | SOY1          | YNL107W                 | YAF9          |
| YKL048C                                          | ELM1          | YMR214W                 | SCJ1          |
| YJL036W                                          | SNX4          | YPL234C                 | TFP3          |
| YHL002W                                          | HSE1          | YOL081W                 | IRA2          |



| Predictions at threshold level 0.80 continued... |               |                         |               |
|--------------------------------------------------|---------------|-------------------------|---------------|
| Gene1 of predicted pair                          |               | Gene2 of predicted pair |               |
| Systematic Name                                  | Standard Name | Systematic Name         | Standard Name |
| YNL243W                                          | SLA2          | YMR224C                 | MRE11         |
| YLR240W                                          | VPS34         | YMR231W                 | PEP5          |
| YMR224C                                          | MRE11         | YNL016W                 | PUB1          |
| YNL215W                                          | IES2          | YOR043W                 | WHI2          |
| YDR469W                                          | SDC1          | YDR440W                 | DOT1          |
| YLR320W                                          | MMS22         | YMR038C                 | CCS1          |
| YLL007C                                          | YLL007C       | YAR014C                 | BUD14         |
| YGL054C                                          | ERV14         | YJR033C                 | RAV1          |
| YGL003C                                          | CDH1          | YEL060C                 | PRB1          |
| YDR245W                                          | MNN10         | YGL163C                 | RAD54         |
| YJL095W                                          | BCK1          | YHR158C                 | KEL1          |
| YEL009C                                          | GCN4          | YCR084C                 | TUP1          |
| YNL238W                                          | KEX2          | YER162C                 | RAD4          |
| YGR108W                                          | CLB1          | YJR135C                 | MCM22         |
| YPR036W                                          | VMA13         | YML071C                 | COG8          |
| YPR018W                                          | RLF2          | YKL101W                 | HSL1          |
| YDL155W                                          | CLB3          | YBR283C                 | SSH1          |
| YDR293C                                          | SSD1          | YMR054W                 | STV1          |
| YOR195W                                          | SLK19         | YBR107C                 | IML3          |
| YHR156C                                          | LIN1          | YFR036W                 | CDC26         |
| YGL115W                                          | SNF4          | YER122C                 | GLO3          |
| YCR020W-B                                        | HTL1          | YPR120C                 | CLB5          |
| YPL240C                                          | HSP82         | YML132W                 | COS3          |
| YCR066W                                          | RAD18         | YJL004C                 | SYS1          |
| YHR098C                                          | SFB3          | YJL168C                 | SET2          |
| YMR153W                                          | NUP53         | YPL256C                 | CLN2          |
| YDL116W                                          | NUP84         | YDR101C                 | ARX1          |
| YIL159W                                          | BNR1          | YER139C                 | YER139C       |
| YLR337C                                          | VRP1          | YBR200W                 | BEM1          |

| Predictions at threshold level 0.80 continued... |               |                         |               |
|--------------------------------------------------|---------------|-------------------------|---------------|
| Gene1 of predicted pair                          |               | Gene2 of predicted pair |               |
| Systematic Name                                  | Standard Name | Systematic Name         | Standard Name |
| YDR004W                                          | RAD57         | YGR081C                 | SLX9          |
| YLR119W                                          | SRN2          | YER040W                 | GLN3          |
| YOL051W                                          | GAL11         | YGR135W                 | PRE9          |
| YDR293C                                          | SSD1          | YDR335W                 | MSN5          |
| YML013W                                          | UBX2          | YMR022W                 | UBC7          |
| YOR080W                                          | DIA2          | YBR215W                 | HPC2          |
| YOL072W                                          | THP1          | YBR111W-A               | SUS1          |
| YBL047C                                          | EDE1          | YHR111W                 | UBA4          |
| YLR095C                                          | IOC2          | YIL053W                 | RHR2          |
| YML001W                                          | YPT7          | YER122C                 | GLO3          |
| YBL079W                                          | NUP170        | YDR076W                 | RAD55         |
| YMR055C                                          | BUB2          | YLR182W                 | SWI6          |
| YML016C                                          | PPZ1          | YEL053C                 | MAK10         |
| YNL068C                                          | FKH2          | YHR152W                 | SPO12         |
| YNL016W                                          | PUB1          | YBR082C                 | UBC4          |
| YGL174W                                          | BUD13         | YDR289C                 | RTT103        |
| YIL053W                                          | RHR2          | YHR039C-A               | VMA10         |
| YDR202C                                          | RAV2          | YNL297C                 | MON2          |
| YHR064C                                          | SSZ1          | YGR285C                 | ZUO1          |
| YLR315W                                          | NKP2          | YJL006C                 | CTK2          |
| YDR383C                                          | NKP1          | YNL215W                 | IES2          |
| YKL126W                                          | YPK1          | YNL058C                 | YNL058C       |
| YMR172W                                          | HOT1          | YHR012W                 | VPS29         |
| YOR001W                                          | RRP6          | YCR086W                 | CSM1          |
| YMR224C                                          | MRE11         | YER162C                 | RAD4          |
| YMR004W                                          | MVP1          | YJR040W                 | GEF1          |
| YAR014C                                          | BUD14         | YNL107W                 | YAF9          |
| YDR192C                                          | NUP42         | YMR273C                 | ZDS1          |
| YMR198W                                          | CIK1          | YKL048C                 | ELM1          |

| Predictions at threshold level 0.80 continued... |               |                         |               |
|--------------------------------------------------|---------------|-------------------------|---------------|
| Gene1 of predicted pair                          |               | Gene2 of predicted pair |               |
| Systematic Name                                  | Standard Name | Systematic Name         | Standard Name |
| YNL201C                                          | PSY2          | YNL248C                 | RPA49         |
| YPL024W                                          | RMI1          | YBR217W                 | ATG12         |
| YLR386W                                          | VAC14         | YJR032W                 | CPR7          |
| YLR079W                                          | SIC1          | YDR183W                 | PLP1          |
| YBL103C                                          | RTG3          | YFL023W                 | BUD27         |
| YLR018C                                          | POM34         | YER115C                 | SPR6          |
| YMR127C                                          | SAS2          | YJL190C                 | RPS22A        |
| YHL002W                                          | HSE1          | YBR114W                 | RAD16         |
| YOR069W                                          | VPS5          | YAL030W                 | SNC1          |
| YFR031C-A                                        | RPL2A         | YLR192C                 | HCR1          |
| YLR399C                                          | BDF1          | YLR182W                 | SWI6          |
| YDR320C                                          | SWA2          | YGL115W                 | SNF4          |
| YFR010W                                          | UBP6          | YAL002W                 | VPS8          |
| YKL032C                                          | IXR1          | YNL229C                 | URE2          |
| YGL178W                                          | MPT5          | YDR388W                 | RVS167        |
| YGL178W                                          | MPT5          | YHR030C                 | SLT2          |
| YLR148W                                          | PEP3          | YDR323C                 | PEP7          |
| YKR028W                                          | SAP190        | YDL047W                 | SIT4          |
| YPL096C-A                                        | ERI1          | YCR009C                 | RVS161        |
| YBR200W                                          | BEM1          | YEL053C                 | MAK10         |
| YCR066W                                          | RAD18         | YPR119W                 | CLB2          |
| YPL137C                                          | GIP3          | YBL025W                 | RRN10         |
| YPL042C                                          | SSN3          | YJR135C                 | MCM22         |
| YDL113C                                          | ATG20         | YLR191W                 | PEX13         |
| YAL024C                                          | LTE1          | YPL152W                 | RRD2          |
| YNL079C                                          | TPM1          | YPL256C                 | CLN2          |
| YNL243W                                          | SLA2          | YPR029C                 | APL4          |
| YPR018W                                          | RLF2          | YDL116W                 | NUP84         |
| YLR234W                                          | TOP3          | YOR038C                 | HIR2          |

| Predictions at threshold level 0.80 continued... |               |                         |               |
|--------------------------------------------------|---------------|-------------------------|---------------|
| Gene1 of predicted pair                          |               | Gene2 of predicted pair |               |
| Systematic Name                                  | Standard Name | Systematic Name         | Standard Name |
| YGR105W                                          | VMA21         | YJL004C                 | SYS1          |
| YDL192W                                          | ARF1          | YLR180W                 | SAM1          |
| YDL160C                                          | DHH1          | YMR199W                 | CLN1          |
| YHR156C                                          | LIN1          | YDL223C                 | HBT1          |
| YKL010C                                          | UFD4          | YKL041W                 | VPS24         |
| YBR194W                                          | SOY1          | YAL002W                 | VPS8          |
| YPL024W                                          | RMI1          | YML028W                 | TSA1          |
| YLR381W                                          | CTF3          | YIR005W                 | IST3          |
| YJR063W                                          | RPA12         | YIL103W                 | DPH1          |
| YPR046W                                          | MCM16         | YDR076W                 | RAD55         |
| YLR079W                                          | SIC1          | YDR318W                 | MCM21         |
| YOR069W                                          | VPS5          | YEL042W                 | GDA1          |
| YDR264C                                          | AKR1          | YGL031C                 | RPL24A        |
| YHR134W                                          | WSS1          | YMR284W                 | YKU70         |
| YBR200W                                          | BEM1          | YKR020W                 | VPS51         |
| YPR072W                                          | NOT5          | YNL030W                 | HHF2          |
| YLR234W                                          | TOP3          | YPL253C                 | VIK1          |
| YOR270C                                          | VPH1          | YEL053C                 | MAK10         |
| YPR036W                                          | VMA13         | YEL060C                 | PRB1          |
| YLR410W                                          | VIP1          | YDL226C                 | GCS1          |
| YBL051C                                          | PIN4          | YJR090C                 | GRR1          |
| YKR020W                                          | VPS51         | YAL002W                 | VPS8          |
| YLR119W                                          | SRN2          | YLR441C                 | RPS1A         |
| YPL050C                                          | MNN9          | YGR135W                 | PRE9          |
| YGR108W                                          | CLB1          | YPL161C                 | BEM4          |
| YDR155C                                          | CPR1          | YGR188C                 | BUB1          |
| YNL076W                                          | MKS1          | YGL252C                 | RTG2          |
| YDR129C                                          | SAC6          | YOR008C                 | SLG1          |
| YGL223C                                          | COG1          | YKR020W                 | VPS51         |

| Predictions at threshold level 0.80 continued... |               |                         |               |
|--------------------------------------------------|---------------|-------------------------|---------------|
| Gene1 of predicted pair                          |               | Gene2 of predicted pair |               |
| Systematic Name                                  | Standard Name | Systematic Name         | Standard Name |
| YBL051C                                          | PIN4          | YEL053C                 | MAK10         |
| YOR035C                                          | SHE4          | YHR114W                 | BZZ1          |
| YBR173C                                          | UMP1          | YDL192W                 | ARF1          |
| YFR010W                                          | UBP6          | YPR036W                 | VMA13         |
| YIL053W                                          | RHR2          | YDL223C                 | HBT1          |
| YDR363W-A                                        | SEM1          | YOR038C                 | HIR2          |
| YMR055C                                          | BUB2          | YHR039C-A               | VMA10         |
| YHR150W                                          | PEX28         | YBR168W                 | PEX32         |
| YOR275C                                          | RIM20         | YDR264C                 | AKR1          |
| YDR329C                                          | PEX3          | YGL153W                 | PEX14         |
| YLR452C                                          | SST2          | YLR093C                 | NYV1          |
| YDR225W                                          | HTA1          | YFR036W                 | CDC26         |
| YBR200W                                          | BEM1          | YJL117W                 | PHO86         |
| YLR079W                                          | SIC1          | YGL019W                 | CKB1          |
| YOR132W                                          | VPS17         | YPL195W                 | APL5          |
| YKL025C                                          | PAN3          | YNL288W                 | CAF40         |
| YKR001C                                          | VPS1          | YEL043W                 | YEL043W       |
| YHL031C                                          | GOS1          | YML071C                 | COG8          |
| YOR083W                                          | WHI5          | YGR104C                 | SRB5          |
| YOR001W                                          | RRP6          | YDL155W                 | CLB3          |
| YBR127C                                          | VMA2          | YBL047C                 | EDE1          |
| YKR001C                                          | VPS1          | YJL095W                 | BCK1          |
| YLR381W                                          | CTF3          | YDR183W                 | PLP1          |
| YCR077C                                          | PAT1          | YLR182W                 | SWI6          |
| YBR194W                                          | SOY1          | YDR289C                 | RTT103        |
| YNL107W                                          | YAF9          | YPR119W                 | CLB2          |
| YLR192C                                          | HCR1          | YLR452C                 | SST2          |
| YOR132W                                          | VPS17         | YOR036W                 | PEP12         |
| YLR093C                                          | NYV1          | YJR125C                 | ENT3          |

| Predictions at threshold level 0.80 continued... |               |                         |               |
|--------------------------------------------------|---------------|-------------------------|---------------|
| Gene1 of predicted pair                          |               | Gene2 of predicted pair |               |
| Systematic Name                                  | Standard Name | Systematic Name         | Standard Name |
| YOR337W                                          | TEA1          | YKL116C                 | PRR1          |
| YDR183W                                          | PLP1          | YJL095W                 | BCK1          |
| YOR080W                                          | DIA2          | YJL006C                 | CTK2          |
| YPL161C                                          | BEM4          | YOL108C                 | INO4          |
| YKL048C                                          | ELM1          | YLR315W                 | NKP2          |
| YNL307C                                          | MCK1          | YMR311C                 | GLC8          |
| YJL154C                                          | VPS35         | YOL108C                 | INO4          |
| YMR055C                                          | BUB2          | YDL226C                 | GCS1          |
| YKR020W                                          | VPS51         | YMR022W                 | UBC7          |
| YHR111W                                          | UBA4          | YKR020W                 | VPS51         |
| YJR063W                                          | RPA12         | YNL030W                 | HHF2          |
| YER044C                                          | ERG28         | YML001W                 | YPT7          |
| YOR132W                                          | VPS17         | YOR035C                 | SHE4          |
| YML001W                                          | YPT7          | YDL077C                 | VAM6          |
| YMR055C                                          | BUB2          | YFR030W                 | MET10         |
| YDR477W                                          | SNF1          | YER049W                 | TPA1          |
| YGR054W                                          | YGR054W       | YJL190C                 | RPS22A        |
| YPL115C                                          | BEM3          | YLR292C                 | SEC72         |
| YJR056C                                          | YJR056C       | YER044C                 | ERG28         |
| YLR083C                                          | EMP70         | YER162C                 | RAD4          |
| YGR270W                                          | YTA7          | YJL095W                 | BCK1          |
| YLR352W                                          | YLR352W       | YDR207C                 | UME6          |
| YLR337C                                          | VRP1          | YGR188C                 | BUB1          |
| YDL083C                                          | RPS16B        | YBR280C                 | SAF1          |
| YHR073W                                          | OSH3          | YBL079W                 | NUP170        |
| YBR200W                                          | BEM1          | YLR370C                 | ARC18         |
| YGL174W                                          | BUD13         | YGR071C                 | YGR071C       |
| YLR119W                                          | SRN2          | YLR192C                 | HCR1          |
| YFR031C-A                                        | RPL2A         | YNL325C                 | FIG4          |

| Predictions at threshold level 0.80 continued... |               |                         |               |
|--------------------------------------------------|---------------|-------------------------|---------------|
| Gene1 of predicted pair                          |               | Gene2 of predicted pair |               |
| Systematic Name                                  | Standard Name | Systematic Name         | Standard Name |
| YMR095C                                          | SNO1          | YLR119W                 | SRN2          |
| YMR016C                                          | SOK2          | YDR137W                 | RGP1          |
| YPL115C                                          | BEM3          | YDR254W                 | CHL4          |
| YNR058W                                          | BIO3          | YDL149W                 | ATG9          |
| YCR065W                                          | HCM1          | YIR009W                 | MSL1          |
| YBL078C                                          | ATG8          | YML001W                 | YPT7          |
| YNR023W                                          | SNF12         | YDR073W                 | SNF11         |
| YDR289C                                          | RTT103        | YEL013W                 | VAC8          |
| YDR318W                                          | MCM21         | YMR038C                 | CCS1          |
| YEL065W                                          | SIT1          | YOR035C                 | SHE4          |
| YIL034C                                          | CAP2          | YDL226C                 | GCS1          |
| YKR099W                                          | BAS1          | YBL025W                 | RRN10         |
| YNL307C                                          | MCK1          | YLR182W                 | SWI6          |
| YLR292C                                          | SEC72         | YBR114W                 | RAD16         |
| YBL067C                                          | UBP13         | YDR207C                 | UME6          |
| YNL054W                                          | VAC7          | YPL253C                 | VIK1          |
| YLR441C                                          | RPS1A         | YLR180W                 | SAM1          |
| YJL183W                                          | MNN11         | YLR180W                 | SAM1          |
| YLR386W                                          | VAC14         | YPR036W                 | VMA13         |
| YKL010C                                          | UFD4          | YBL072C                 | RPS8A         |
| YLR399C                                          | BDF1          | YMR055C                 | BUB2          |
| YNL248C                                          | RPA49         | YNL107W                 | YAF9          |
| YAL024C                                          | LTE1          | YNL041C                 | COG6          |
| YMR224C                                          | MRE11         | YLR370C                 | ARC18         |
| YPL227C                                          | ALG5          | YMR214W                 | SCJ1          |
| YLR234W                                          | TOP3          | YBR171W                 | SEC66         |
| YIL159W                                          | BNR1          | YFL023W                 | BUD27         |
| YML095C                                          | RAD10         | YNL229C                 | URE2          |
| YDR174W                                          | HMO1          | YLR410W                 | VIP1          |

| Predictions at threshold level 0.80 continued... |               |                         |               |
|--------------------------------------------------|---------------|-------------------------|---------------|
| Gene1 of predicted pair                          |               | Gene2 of predicted pair |               |
| Systematic Name                                  | Standard Name | Systematic Name         | Standard Name |
| YPL256C                                          | CLN2          | YEL036C                 | ANP1          |
| YFR031C-A                                        | RPL2A         | YBL103C                 | RTG3          |
| YBL021C                                          | HAP3          | YDR155C                 | CPR1          |
| YDL185W                                          | TFP1          | YEL051W                 | VMA8          |
| YDR320C                                          | SWA2          | YGL054C                 | ERV14         |
| YPR036W                                          | VMA13         | YGL212W                 | VAM7          |
| YIL034C                                          | CAP2          | YHR178W                 | STB5          |
| YKL007W                                          | CAP1          | YNL293W                 | MSB3          |
| YJR032W                                          | CPR7          | YPL195W                 | APL5          |
| YMR202W                                          | ERG2          | YPL018W                 | CTF19         |
| YFR034C                                          | PHO4          | YDR363W-A               | SEM1          |
| YMR026C                                          | PEX12         | YJR032W                 | CPR7          |
| YPL120W                                          | VPS30         | YOL018C                 | TLG2          |
| YDR320C                                          | SWA2          | YJL004C                 | SYS1          |
| YDL042C                                          | SIR2          | YML109W                 | ZDS2          |
| YLL007C                                          | YLL007C       | YJL095W                 | BCK1          |
| YJR135C                                          | MCM22         | YOR141C                 | ARP8          |
| YKL117W                                          | SBA1          | YGR059W                 | SPR3          |
| YHR200W                                          | RPN10         | YPL018W                 | CTF19         |
| YKL025C                                          | PAN3          | YHL002W                 | HSE1          |
| YCR086W                                          | CSM1          | YAR014C                 | BUD14         |
| YGL078C                                          | DBP3          | YNL076W                 | MKS1          |
| YPL018W                                          | CTF19         | YNL116W                 | DMA2          |
| YKL116C                                          | PRR1          | YLR320W                 | MMS22         |
| YPR084W                                          | YPR084W       | YOR327C                 | SNC2          |
| YDL160C                                          | DHH1          | YLR079W                 | SIC1          |
| YGL054C                                          | ERV14         | YDL006W                 | PTC1          |
| YDR097C                                          | MSH6          | YFR010W                 | UBP6          |
| YDR439W                                          | LRS4          | YPR120C                 | CLB5          |



| Predictions at threshold level 0.80 continued... |               |                         |               |
|--------------------------------------------------|---------------|-------------------------|---------------|
| Gene1 of predicted pair                          |               | Gene2 of predicted pair |               |
| Systematic Name                                  | Standard Name | Systematic Name         | Standard Name |
| YMR133W                                          | REC114        | YOL121C                 | RPS19A        |
| YML117W                                          | NAB6          | YJL183W                 | MNN11         |
| YOR069W                                          | VPS5          | YDR358W                 | GGA1          |
| YMR095C                                          | SNO1          | YNL307C                 | MCK1          |
| YER110C                                          | KAP123        | YGL151W                 | NUT1          |
| YPR036W                                          | VMA13         | YMR230W                 | RPS10B        |
| YOR195W                                          | SLK19         | YKR057W                 | RPS21A        |
| YBR290W                                          | BSD2          | YMR109W                 | MYO5          |
| YPR120C                                          | CLB5          | YDR310C                 | SUM1          |
| YGL033W                                          | HOP2          | YOL111C                 | MDY2          |
| YBL103C                                          | RTG3          | YNR072W                 | HXT17         |
| YEL053C                                          | MAK10         | YER122C                 | GLO3          |
| YLR447C                                          | VMA6          | YDR155C                 | CPR1          |
| YER144C                                          | UBP5          | YNL058C                 | YNL058C       |
| YCR077C                                          | PAT1          | YNL147W                 | LSM7          |
| YBR171W                                          | SEC66         | YPL195W                 | APL5          |
| YLR386W                                          | VAC14         | YMR214W                 | SCJ1          |
| YHR205W                                          | SCH9          | YMR311C                 | GLC8          |
| YPL057C                                          | SUR1          | YBR107C                 | IML3          |
| YDR443C                                          | SSN2          | YLR095C                 | IOC2          |
| YIL159W                                          | BNR1          | YPR046W                 | MCM16         |
| YDR358W                                          | GGA1          | YMR152W                 | YIM1          |
| YGL133W                                          | ITC1          | YDL047W                 | SIT4          |
| YMR231W                                          | PEP5          | YLR352W                 | YLR352W       |
| YGR249W                                          | MGA1          | YKL116C                 | PRR1          |
| YPR029C                                          | APL4          | YHR108W                 | GGA2          |
| YMR022W                                          | UBC7          | YDL047W                 | SIT4          |
| YOR109W                                          | INP53         | YAL002W                 | VPS8          |
| YDR174W                                          | HMO1          | YOR141C                 | ARP8          |

| Predictions at threshold level 0.80 continued... |               |                         |               |
|--------------------------------------------------|---------------|-------------------------|---------------|
| Gene1 of predicted pair                          |               | Gene2 of predicted pair |               |
| Systematic Name                                  | Standard Name | Systematic Name         | Standard Name |
| YDL154W                                          | MSH5          | YHR079C-A               | SAE3          |
| YHL020C                                          | OPI1          | YKR030W                 | GMH1          |
| YOR290C                                          | SNF2          | YLR306W                 | UBC12         |
| YDR443C                                          | SSN2          | YLR398C                 | SKI2          |
| YOR033C                                          | EXO1          | YJL187C                 | SWE1          |
| YNL199C                                          | GCR2          | YDR440W                 | DOT1          |
| YML016C                                          | PPZ1          | YLR410W                 | VIP1          |
| YDR108W                                          | GSG1          | YNL127W                 | FAR11         |
| YBR112C                                          | CYC8          | YOR140W                 | SFL1          |
| YER144C                                          | UBP5          | YLR441C                 | RPS1A         |
| YMR116C                                          | ASC1          | YKL048C                 | ELM1          |
| YDL020C                                          | RPN4          | YDR137W                 | RGP1          |
| YCR077C                                          | PAT1          | YLR370C                 | ARC18         |
| YDR004W                                          | RAD57         | YML103C                 | NUP188        |
| YNL248C                                          | RPA49         | YJR063W                 | RPA12         |
| YOR290C                                          | SNF2          | YLR093C                 | NYV1          |
| YOR195W                                          | SLK19         | YJL136C                 | RPS21B        |
| YMR172W                                          | HOT1          | YDR293C                 | SSD1          |
| YDR137W                                          | RGP1          | YER122C                 | GLO3          |
| YIL159W                                          | BNR1          | YDL083C                 | RPS16B        |
| YGR019W                                          | UGA1          | YOL067C                 | RTG1          |
| YHR134W                                          | WSS1          | YDL013W                 | SLX5          |
| YPL234C                                          | TFP3          | YPL120W                 | VPS30         |
| YPL161C                                          | BEM4          | YGR054W                 | YGR054W       |
| YKR048C                                          | NAP1          | YDL047W                 | SIT4          |
| YOR132W                                          | VPS17         | YHR114W                 | BZZ1          |
| YLR119W                                          | SRN2          | YEL053C                 | MAK10         |
| YPL018W                                          | CTF19         | YAR014C                 | BUD14         |
| YPL161C                                          | BEM4          | YBR036C                 | CSG2          |

| Predictions at threshold level 0.80 continued... |               |                         |               |
|--------------------------------------------------|---------------|-------------------------|---------------|
| Gene1 of predicted pair                          |               | Gene2 of predicted pair |               |
| Systematic Name                                  | Standard Name | Systematic Name         | Standard Name |
| YAL010C                                          | MDM10         | YHR115C                 | DMA1          |
| YLR452C                                          | SST2          | YPL137C                 | GIP3          |
| YLR192C                                          | HCR1          | YDR358W                 | GGA1          |
| YDL042C                                          | SIR2          | YDR440W                 | DOT1          |
| YGR072W                                          | UPF3          | YER162C                 | RAD4          |
| YAL024C                                          | LTE1          | YJL095W                 | BCK1          |
| YGL115W                                          | SNF4          | YAL002W                 | VPS8          |
| YJL136C                                          | RPS21B        | YBL047C                 | EDE1          |
| YNL215W                                          | IES2          | YLR410W                 | VIP1          |
| YLL039C                                          | UBI4          | YKL032C                 | IXR1          |
| YGL054C                                          | ERV14         | YAR014C                 | BUD14         |
| YOL111C                                          | MDY2          | YOR327C                 | SNC2          |
| YHR178W                                          | STB5          | YER139C                 | YER139C       |
| YDR202C                                          | RAV2          | YJR033C                 | RAV1          |
| YJL127C                                          | SPT10         | YDL226C                 | GCS1          |
| YNL229C                                          | URE2          | YGL163C                 | RAD54         |
| YDR202C                                          | RAV2          | YMR054W                 | STV1          |
| YER173W                                          | RAD24         | YGL100W                 | SEH1          |
| YNL106C                                          | INP52         | YDR378C                 | LSM6          |
| YOR270C                                          | VPH1          | YGL025C                 | PGD1          |
| YGR097W                                          | ASK10         | YNL025C                 | SSN8          |
| YDR289C                                          | RTT103        | YOR141C                 | ARP8          |
| YDL077C                                          | VAM6          | YNL127W                 | FAR11         |
| YDL020C                                          | RPN4          | YJR140C                 | HIR3          |
| YLR079W                                          | SIC1          | YLR425W                 | TUS1          |
| YPR120C                                          | CLB5          | YLR254C                 | NDL1          |
| YBR173C                                          | UMP1          | YMR214W                 | SCJ1          |
| YCL067C                                          | HMLALPHA2     | YBR112C                 | CYC8          |
| YDR318W                                          | MCM21         | YLR370C                 | ARC18         |

| Predictions at threshold level 0.80 continued... |               |                         |               |
|--------------------------------------------------|---------------|-------------------------|---------------|
| Gene1 of predicted pair                          |               | Gene2 of predicted pair |               |
| Systematic Name                                  | Standard Name | Systematic Name         | Standard Name |
| YPL024W                                          | RMI1          | YNL032W                 | SIW14         |
| YOR069W                                          | VPS5          | YER162C                 | RAD4          |
| YDR137W                                          | RGP1          | YBR171W                 | SEC66         |
| YDR174W                                          | HMO1          | YBR228W                 | SLX1          |
| YKL126W                                          | YPK1          | YNL238W                 | KEX2          |
| YMR055C                                          | BUB2          | YJR084W                 | CSN12         |
| YKL007W                                          | CAP1          | YIL034C                 | CAP2          |
| YHL022C                                          | SPO11         | YGL213C                 | SKI8          |
| YPR046W                                          | MCM16         | YDR318W                 | MCM21         |
| YHR156C                                          | LIN1          | YJL172W                 | CPS1          |
| YDR443C                                          | SSN2          | YLR094C                 | GIS3          |
| YDL184C                                          | RPL41A        | YML001W                 | YPT7          |
| YFR010W                                          | UBP6          | YBR108W                 | YBR108W       |
| YDR443C                                          | SSN2          | YDL223C                 | HBT1          |
| YBR217W                                          | ATG12         | YPL037C                 | EGD1          |
| YBR131W                                          | CCZ1          | YJL095W                 | BCK1          |
| YGL237C                                          | HAP2          | YCR086W                 | CSM1          |
| YER044C                                          | ERG28         | YPR046W                 | MCM16         |
| YPL161C                                          | BEM4          | YMR054W                 | STV1          |
| YPL024W                                          | RMI1          | YPR120C                 | CLB5          |
| YLR337C                                          | VRP1          | YDR440W                 | DOT1          |
| YDR477W                                          | SNF1          | YMR133W                 | REC114        |
| YHR156C                                          | LIN1          | YNL076W                 | MKS1          |
| YLR234W                                          | TOP3          | YNL291C                 | MID1          |
| YMR142C                                          | RPL13B        | YLR371W                 | ROM2          |
| YPL105C                                          | YPL105C       | YER122C                 | GLO3          |
| YCR020C-A                                        | MAK31         | YOR327C                 | SNC2          |
| YBL103C                                          | RTG3          | YJR084W                 | CSN12         |
| YIL076W                                          | SEC28         | YOR327C                 | SNC2          |

| Predictions at threshold level 0.80 continued... |               |                         |               |
|--------------------------------------------------|---------------|-------------------------|---------------|
| Gene1 of predicted pair                          |               | Gene2 of predicted pair |               |
| Systematic Name                                  | Standard Name | Systematic Name         | Standard Name |
| YLL039C                                          | UBI4          | YJR125C                 | ENT3          |
| YLR093C                                          | NYV1          | YBR019C                 | GAL10         |
| YDR174W                                          | HMO1          | YDR378C                 | LSM6          |
| YPR017C                                          | DSS4          | YHL031C                 | GOS1          |
| YGL250W                                          | RMR1          | YGR188C                 | BUB1          |
| YCL032W                                          | STE50         | YER118C                 | SHO1          |
| YOR001W                                          | RRP6          | YBR009C                 | HHF1          |
| YJL036W                                          | SNX4          | YEL051W                 | VMA8          |
| YHR073W                                          | OSH3          | YGR059W                 | SPR3          |
| YNL201C                                          | PSY2          | YML103C                 | NUP188        |
| YGL223C                                          | COG1          | YGL200C                 | EMP24         |
| YBR200W                                          | BEM1          | YDL223C                 | HBT1          |
| YLR170C                                          | APS1          | YAL030W                 | SNC1          |
| YOR080W                                          | DIA2          | YOL030W                 | GAS5          |
| YMR109W                                          | MYO5          | YER122C                 | GLO3          |
| YPL195W                                          | APL5          | YLR370C                 | ARC18         |
| YLR292C                                          | SEC72         | YBR200W                 | BEM1          |
| YML102W                                          | CAC2          | YDR076W                 | RAD55         |
| YPR131C                                          | NAT3          | YKL068W                 | NUP100        |
| YKL048C                                          | ELM1          | YDR318W                 | MCM21         |
| YLR090W                                          | XDJ1          | YIL076W                 | SEC28         |
| YLR386W                                          | VAC14         | YGR270W                 | YTA7          |
| YGR105W                                          | VMA21         | YML071C                 | COG8          |
| YLR192C                                          | HCR1          | YDR129C                 | SAC6          |
| YPL045W                                          | VPS16         | YGL124C                 | MON1          |
| YPR051W                                          | MAK3          | YEL053C                 | MAK10         |
| YHR111W                                          | UBA4          | YLR182W                 | SWI6          |
| YDR477W                                          | SNF1          | YER116C                 | SLX8          |
| YBL058W                                          | SHP1          | YDR484W                 | VPS52         |

| Predictions at threshold level 0.80 continued... |               |                         |               |
|--------------------------------------------------|---------------|-------------------------|---------------|
| Gene1 of predicted pair                          |               | Gene2 of predicted pair |               |
| Systematic Name                                  | Standard Name | Systematic Name         | Standard Name |
| YJL183W                                          | MNN11         | YKL080W                 | VMA5          |
| YDL116W                                          | NUP84         | YER115C                 | SPR6          |
| YFL023W                                          | BUD27         | YMR133W                 | REC114        |
| YJR140C                                          | HIR3          | YOL081W                 | IRA2          |
| YMR153W                                          | NUP53         | YMR133W                 | REC114        |
| YLR381W                                          | CTF3          | YML095C                 | RAD10         |
| YJL172W                                          | CPS1          | YDR137W                 | RGP1          |
| YLR083C                                          | EMP70         | YPR032W                 | SRO7          |
| YER044C                                          | ERG28         | YMR230W                 | RPS10B        |
| YLR192C                                          | HCR1          | YOR290C                 | SNF2          |
| YJL004C                                          | SYS1          | YER122C                 | GLO3          |
| YOR304W                                          | ISW2          | YMR139W                 | RIM11         |
| YML013W                                          | UBX2          | YGR188C                 | BUB1          |
| YDR289C                                          | RTT103        | YPL018W                 | CTF19         |
| YGR270W                                          | YTA7          | YDR183W                 | PLP1          |
| YJL053W                                          | PEP8          | YLR309C                 | IMH1          |
| YHR134W                                          | WSS1          | YPR051W                 | MAK3          |
| YDR363W-A                                        | SEM1          | YCR077C                 | PAT1          |
| YOR290C                                          | SNF2          | YMR133W                 | REC114        |
| YPL161C                                          | BEM4          | YDR183W                 | PLP1          |
| YOR043W                                          | WHI2          | YLR180W                 | SAM1          |
| YGL135W                                          | RPL1B         | YOR080W                 | DIA2          |
| YNL087W                                          | TCB2          | YMR133W                 | REC114        |
| YFR010W                                          | UBP6          | YDL192W                 | ARF1          |
| YBL101C                                          | ECM21         | YOL081W                 | IRA2          |
| YBR041W                                          | FAT1          | YJL052W                 | TDH1          |
| YOR358W                                          | HAP5          | YDR289C                 | RTT103        |
| YOR290C                                          | SNF2          | YDL083C                 | RPS16B        |
| YMR231W                                          | PEP5          | YHR010W                 | RPL27A        |

| Predictions at threshold level 0.80 continued... |               |                         |               |
|--------------------------------------------------|---------------|-------------------------|---------------|
| Gene1 of predicted pair                          |               | Gene2 of predicted pair |               |
| Systematic Name                                  | Standard Name | Systematic Name         | Standard Name |
| YBR173C                                          | UMP1          | YMR055C                 | BUB2          |
| YCR063W                                          | BUD31         | YPR101W                 | SNT309        |
| YLR119W                                          | SRN2          | YDL223C                 | HBT1          |
| YGR072W                                          | UPF3          | YGL212W                 | VAM7          |
| YJL036W                                          | SNX4          | YNR032W                 | PPG1          |
| YBR108W                                          | YBR108W       | YJR090C                 | GRR1          |
| YPR018W                                          | RLF2          | YDR254W                 | CHL4          |
| YML117W                                          | NAB6          | YLR371W                 | ROM2          |
| YNL243W                                          | SLA2          | YNL094W                 | APP1          |
| YML115C                                          | VAN1          | YOR270C                 | VPH1          |
| YML103C                                          | NUP188        | YDR289C                 | RTT103        |
| YLR090W                                          | XDJ1          | YPL024W                 | RMI1          |
| YDR076W                                          | RAD55         | YDR207C                 | UME6          |
| YDR293C                                          | SSD1          | YNL293W                 | MSB3          |
| YPR189W                                          | SKI3          | YGL213C                 | SKI8          |
| YIR002C                                          | MPH1          | YPR119W                 | CLB2          |
| YDL155W                                          | CLB3          | YNL107W                 | YAF9          |
| YBL058W                                          | SHP1          | YFR010W                 | UBP6          |
| YPL253C                                          | VIK1          | YML028W                 | TSA1          |
| YBR030W                                          | YBR030W       | YGL003C                 | CDH1          |
| YDR137W                                          | RGP1          | YNL044W                 | YIP3          |
| YMR224C                                          | MRE11         | YNL206C                 | RTT106        |
| YBR019C                                          | GAL10         | YDL192W                 | ARF1          |
| YPL042C                                          | SSN3          | YGL003C                 | CDH1          |
| YGL190C                                          | CDC55         | YML094W                 | GIM5          |
| YHR098C                                          | SFB3          | YLR039C                 | RIC1          |
| YGL174W                                          | BUD13         | YEL013W                 | VAC8          |
| YIL076W                                          | SEC28         | YML071C                 | COG8          |
| YBR131W                                          | CCZ1          | YLR371W                 | ROM2          |

| Predictions at threshold level 0.80 continued... |               |                         |               |
|--------------------------------------------------|---------------|-------------------------|---------------|
| Gene1 of predicted pair                          |               | Gene2 of predicted pair |               |
| Systematic Name                                  | Standard Name | Systematic Name         | Standard Name |
| YHL031C                                          | GOS1          | YML038C                 | YMD8          |
| YDR507C                                          | GIN4          | YDR422C                 | SIP1          |
| YDR195W                                          | REF2          | YAR014C                 | BUD14         |
| YBL047C                                          | EDE1          | YEL036C                 | ANP1          |
| YMR039C                                          | SUB1          | YHR178W                 | STB5          |
| YNL238W                                          | KEX2          | YKL119C                 | VPH2          |
| YDR245W                                          | MNN10         | YPL158C                 | YPL158C       |
| YDR358W                                          | GGA1          | YER122C                 | GLO3          |
| YDR261C                                          | EXG2          | YBR036C                 | CSG2          |
| YLR095C                                          | IOC2          | YLR371W                 | ROM2          |
| YMR216C                                          | SKY1          | YER162C                 | RAD4          |
| YLR090W                                          | XDJ1          | YBL025W                 | RRN10         |
| YGR261C                                          | APL6          | YDR153C                 | ENT5          |
| YDL160C                                          | DHH1          | YER027C                 | GAL83         |
| YJL036W                                          | SNX4          | YOL018C                 | TLG2          |
| YPL105C                                          | YPL105C       | YER162C                 | RAD4          |
| YPL161C                                          | BEM4          | YIL008W                 | URM1          |
| YGL087C                                          | MMS2          | YDR289C                 | RTT103        |
| YLR119W                                          | SRN2          | YMR224C                 | MRE11         |
| YJL030W                                          | MAD2          | YIL033C                 | BCY1          |
| YAL024C                                          | LTE1          | YDR289C                 | RTT103        |
| YLR083C                                          | EMP70         | YDL006W                 | PTC1          |
| YHR111W                                          | UBA4          | YDR318W                 | MCM21         |
| YLR441C                                          | RPS1A         | YLR398C                 | SKI2          |
| YER087C-B                                        | SBH1          | YNL044W                 | YIP3          |
| YAL024C                                          | LTE1          | YDR156W                 | RPA14         |
| YBL047C                                          | EDE1          | YKR020W                 | VPS51         |
| YPL024W                                          | RMI1          | YKL101W                 | HSL1          |
| YOR127W                                          | RGA1          | YOR327C                 | SNC2          |



| Predictions at threshold level 0.80 continued... |               |                         |               |
|--------------------------------------------------|---------------|-------------------------|---------------|
| Gene1 of predicted pair                          |               | Gene2 of predicted pair |               |
| Systematic Name                                  | Standard Name | Systematic Name         | Standard Name |
| YBR217W                                          | ATG12         | YFL023W                 | BUD27         |
| YOR127W                                          | RGA1          | YJR040W                 | GEF1          |
| YOL126C                                          | MDH2          | YER110C                 | KAP123        |
| YNR052C                                          | POP2          | YML028W                 | TSA1          |
| YIL159W                                          | BNR1          | YPL195W                 | APL5          |
| YNL243W                                          | SLA2          | YOR032C                 | HMS1          |
| YDL184C                                          | RPL41A        | YNR072W                 | HXT17         |
| YLR095C                                          | IOC2          | YHR200W                 | RPN10         |
| YNL218W                                          | MGS1          | YNL106C                 | INP52         |
| YMR039C                                          | SUB1          | YLR234W                 | TOP3          |
| YOR195W                                          | SLK19         | YPL253C                 | VIK1          |
| YAL024C                                          | LTE1          | YOR327C                 | SNC2          |
| YDR293C                                          | SSD1          | YGR072W                 | UPF3          |
| YEL050C                                          | RML2          | YPR120C                 | CLB5          |
| YPL161C                                          | BEM4          | YDR207C                 | UME6          |
| YPR051W                                          | MAK3          | YDL155W                 | CLB3          |
| YKL129C                                          | MYO3          | YBR260C                 | RGD1          |
| YOR141C                                          | ARP8          | YOL091W                 | SPO21         |
| YOR035C                                          | SHE4          | YJL095W                 | BCK1          |
| YJR140C                                          | HIR3          | YPR120C                 | CLB5          |
| YMR026C                                          | PEX12         | YMR152W                 | YIM1          |
| YJR135C                                          | MCM22         | YNL107W                 | YAF9          |
| YMR172W                                          | HOT1          | YMR109W                 | MYO5          |
| YBR173C                                          | UMP1          | YPR119W                 | CLB2          |
| YOR275C                                          | RIM20         | YBR082C                 | UBC4          |
| YBL021C                                          | HAP3          | YDR289C                 | RTT103        |
| YGL033W                                          | HOP2          | YDL083C                 | RPS16B        |
| YBR108W                                          | YBR108W       | YBL025W                 | RRN10         |
| YHR111W                                          | UBA4          | YJL183W                 | MNN11         |

| Predictions at threshold level 0.80 continued... |               |                         |               |
|--------------------------------------------------|---------------|-------------------------|---------------|
| Gene1 of predicted pair                          |               | Gene2 of predicted pair |               |
| Systematic Name                                  | Standard Name | Systematic Name         | Standard Name |
| YNL199C                                          | GCR2          | YLR371W                 | ROM2          |
| YOR080W                                          | DIA2          | YDR245W                 | MNN10         |
| YDR183W                                          | PLP1          | YAL002W                 | VPS8          |
| YKL032C                                          | IXR1          | YNL079C                 | TPM1          |
| YLR234W                                          | TOP3          | YJL183W                 | MNN11         |
| YOR033C                                          | EXO1          | YGL163C                 | RAD54         |
| YFR031C-A                                        | RPL2A         | YKL116C                 | PRR1          |
| YNL031C                                          | HHT2          | YJL140W                 | RPB4          |
| YBR173C                                          | UMP1          | YPL037C                 | EGD1          |
| YOR308C                                          | SNU66         | YER122C                 | GLO3          |
| YPR017C                                          | DSS4          | YPR032W                 | SRO7          |
| YHR081W                                          | LRP1          | YMR311C                 | GLC8          |
| YLR399C                                          | BDF1          | YBR010W                 | HHT1          |
| YDR289C                                          | RTT103        | YBR114W                 | RAD16         |
| YGL147C                                          | RPL9A         | YJL183W                 | MNN11         |
| YJL124C                                          | LSM1          | YDR335W                 | MSN5          |
| YHL031C                                          | GOS1          | YJR033C                 | RAV1          |
| YOR375C                                          | GDH1          | YPL161C                 | BEM4          |
| YFR031C-A                                        | RPL2A         | YEL060C                 | PRB1          |
| YPL001W                                          | HAT1          | YDR310C                 | SUM1          |
| YKL007W                                          | CAP1          | YPR119W                 | CLB2          |
| YKR014C                                          | YPT52         | YML097C                 | VPS9          |
| YPL022W                                          | RAD1          | YJR005W                 | APL1          |
| YMR004W                                          | MVP1          | YHR039C-A               | VMA10         |
| YDR443C                                          | SSN2          | YGL147C                 | RPL9A         |
| YGR270W                                          | YTA7          | YGL163C                 | RAD54         |
| YNL236W                                          | SIN4          | YJL006C                 | CTK2          |
| YLR061W                                          | RPL22A        | YMR198W                 | CIK1          |
| YLR447C                                          | VMA6          | YHR111W                 | UBA4          |

| Predictions at threshold level 0.80 continued... |               |                         |               |
|--------------------------------------------------|---------------|-------------------------|---------------|
| Gene1 of predicted pair                          |               | Gene2 of predicted pair |               |
| Systematic Name                                  | Standard Name | Systematic Name         | Standard Name |
| YFR031C-A                                        | RPL2A         | YGL147C                 | RPL9A         |
| YER115C                                          | SPR6          | YKR024C                 | DBP7          |
| YGL115W                                          | SNF4          | YPL234C                 | TFP3          |
| YPL161C                                          | BEM4          | YBL025W                 | RRN10         |
| YPR051W                                          | MAK3          | YOL108C                 | INO4          |
| YJR063W                                          | RPA12         | YGR270W                 | YTA7          |
| YDL160C                                          | DHH1          | YGL003C                 | CDH1          |
| YHR156C                                          | LIN1          | YER144C                 | UBP5          |
| YFR031C-A                                        | RPL2A         | YPL161C                 | BEM4          |
| YKL116C                                          | PRR1          | YDR484W                 | VPS52         |
| YKR072C                                          | SIS2          | YML095C                 | RAD10         |
| YMR095C                                          | SNO1          | YOR043W                 | WHI2          |
| YJL124C                                          | LSM1          | YNL225C                 | CNM67         |
| YNL058C                                          | YNL058C       | YBR019C                 | GAL10         |
| YKL110C                                          | KTI12         | YDR183W                 | PLP1          |
| YKL048C                                          | ELM1          | YOR327C                 | SNC2          |
| YBR131W                                          | CCZ1          | YJL183W                 | MNN11         |
| YBL087C                                          | RPL23A        | YDL047W                 | SIT4          |
| YNL206C                                          | RTT106        | YBR009C                 | HHF1          |
| YOR039W                                          | CKB2          | YMR167W                 | MLH1          |
| YNL218W                                          | MGS1          | YDL101C                 | DUN1          |
| YMR016C                                          | SOK2          | YOL111C                 | MDY2          |
| YHR010W                                          | RPL27A        | YMR038C                 | CCS1          |
| YNL058C                                          | YNL058C       | YEL053C                 | MAK10         |
| YIL036W                                          | CST6          | YLR398C                 | SKI2          |
| YGR040W                                          | KSS1          | YBL016W                 | FUS3          |
| YOR080W                                          | DIA2          | YCL037C                 | SRO9          |
| YDR146C                                          | SWI5          | YPL256C                 | CLN2          |
| YHL020C                                          | OPI1          | YGL054C                 | ERV14         |

| Predictions at threshold level 0.80 continued... |               |                         |               |
|--------------------------------------------------|---------------|-------------------------|---------------|
| Gene1 of predicted pair                          |               | Gene2 of predicted pair |               |
| Systematic Name                                  | Standard Name | Systematic Name         | Standard Name |
| YPR051W                                          | MAK3          | YER162C                 | RAD4          |
| YGL178W                                          | MPT5          | YML041C                 | VPS71         |
| YMR224C                                          | MRE11         | YDR358W                 | GGA1          |
| YOR035C                                          | SHE4          | YER040W                 | GLN3          |
| YOR043W                                          | WHI2          | YHR081W                 | LRP1          |
| YOR337W                                          | TEA1          | YOR290C                 | SNF2          |
| YPL047W                                          | SGF11         | YER107C                 | GLE2          |
| YGR270W                                          | YTA7          | YOL067C                 | RTG1          |
| YOR290C                                          | SNF2          | YEL053C                 | MAK10         |
| YOL006C                                          | TOP1          | YGL095C                 | VPS45         |
| YLR396C                                          | VPS33         | YDR323C                 | PEP7          |
| YKL025C                                          | PAN3          | YDL020C                 | RPN4          |
| YNR072W                                          | HXT17         | YPL161C                 | BEM4          |
| YGL087C                                          | MMS2          | YGR054W                 | YGR054W       |
| YKL025C                                          | PAN3          | YOL067C                 | RTG1          |
| YCR020W-B                                        | HTL1          | YGR275W                 | RTT102        |
| YKR059W                                          | TIF1          | YJL138C                 | TIF2          |
| YDL116W                                          | NUP84         | YIL103W                 | DPH1          |
| YPR017C                                          | DSS4          | YNL051W                 | COG5          |
| YDR448W                                          | ADA2          | YOR038C                 | HIR2          |
| YIL053W                                          | RHR2          | YBR108W                 | YBR108W       |
| YJR060W                                          | CBF1          | YGR135W                 | PRE9          |
| YMR127C                                          | SAS2          | YGR054W                 | YGR054W       |
| YNL215W                                          | IES2          | YBR195C                 | MSI1          |
| YIL076W                                          | SEC28         | YJR040W                 | GEF1          |
| YOR132W                                          | VPS17         | YKL119C                 | VPH2          |
| YPR084W                                          | YPR084W       | YJR040W                 | GEF1          |
| YPR131C                                          | NAT3          | YDL059C                 | RAD59         |
| YOL145C                                          | CTR9          | YNL031C                 | HHT2          |

| Predictions at threshold level 0.80 continued... |               |                         |               |
|--------------------------------------------------|---------------|-------------------------|---------------|
| Gene1 of predicted pair                          |               | Gene2 of predicted pair |               |
| Systematic Name                                  | Standard Name | Systematic Name         | Standard Name |
| YDL002C                                          | NHP10         | YDR310C                 | SUM1          |
| YAL024C                                          | LTE1          | YBR108W                 | YBR108W       |
| YDR395W                                          | SXM1          | YNL069C                 | RPL16B        |
| YJR056C                                          | YJR056C       | YMR230W                 | RPS10B        |
| YMR026C                                          | PEX12         | YGL078C                 | DBP3          |
| YJL036W                                          | SNX4          | YAR014C                 | BUD14         |
| YMR116C                                          | ASC1          | YPL213W                 | LEA1          |
| YBR107C                                          | IML3          | YLR315W                 | NKP2          |
| YFL023W                                          | BUD27         | YER162C                 | RAD4          |
| YAL024C                                          | LTE1          | YPL001W                 | HAT1          |
| YEL053C                                          | MAK10         | YOL121C                 | RPS19A        |
| YOR337W                                          | TEA1          | YER139C                 | YER139C       |
| YNL032W                                          | SIW14         | YPL037C                 | EGD1          |
| YBR181C                                          | RPS6B         | YAL002W                 | VPS8          |
| YMR172W                                          | HOT1          | YBL051C                 | PIN4          |
| YDR484W                                          | VPS52         | YML071C                 | COG8          |
| YHR060W                                          | VMA22         | YHL020C                 | OPI1          |
| YBR260C                                          | RGD1          | YHR012W                 | VPS29         |
| YKL160W                                          | ELF1          | YER122C                 | GLO3          |
| YNL206C                                          | RTT106        | YNL116W                 | DMA2          |
| YDR443C                                          | SSN2          | YLR079W                 | SIC1          |
| YBR278W                                          | DPB3          | YDR310C                 | SUM1          |
| YBR030W                                          | YBR030W       | YGL115W                 | SNF4          |
| YBR228W                                          | SLX1          | YLR135W                 | SLX4          |
| YPL018W                                          | CTF19         | YML112W                 | CTK3          |
| YDL042C                                          | SIR2          | YNL206C                 | RTT106        |
| YDL223C                                          | HBT1          | YBL067C                 | UBP13         |
| YDR293C                                          | SSD1          | YPR032W                 | SRO7          |
| YKL139W                                          | CTK1          | YOR195W                 | SLK19         |

| Predictions at threshold level 0.80 continued... |               |                         |               |
|--------------------------------------------------|---------------|-------------------------|---------------|
| Gene1 of predicted pair                          |               | Gene2 of predicted pair |               |
| Systematic Name                                  | Standard Name | Systematic Name         | Standard Name |
| YFR010W                                          | UBP6          | YNL058C                 | YNL058C       |
| YHL031C                                          | GOS1          | YPL105C                 | YPL105C       |
| YNL288W                                          | CAF40         | YLR233C                 | EST1          |
| YNR072W                                          | HXT17         | YLR094C                 | GIS3          |
| YPR036W                                          | VMA13         | YOR043W                 | WHI2          |
| YJR135C                                          | MCM22         | YJR005W                 | APL1          |
| YOR195W                                          | SLK19         | YPL022W                 | RAD1          |
| YNL243W                                          | SLA2          | YLR268W                 | SEC22         |
| YDR137W                                          | RGP1          | YMR152W                 | YIM1          |
| YMR172W                                          | HOT1          | YEL053C                 | MAK10         |
| YHR060W                                          | VMA22         | YOL108C                 | INO4          |
| YKL139W                                          | CTK1          | YLR370C                 | ARC18         |
| YLR386W                                          | VAC14         | YBR280C                 | SAF1          |
| YNL116W                                          | DMA2          | YNL225C                 | CNM67         |
| YIL034C                                          | CAP2          | YJL154C                 | VPS35         |
| YPL042C                                          | SSN3          | YGL115W                 | SNF4          |
| YFR031C-A                                        | RPL2A         | YDR137W                 | RGP1          |
| YOR043W                                          | WHI2          | YJR032W                 | CPR7          |
| YLR371W                                          | ROM2          | YLR398C                 | SKI2          |
| YNL180C                                          | RHO5          | YFL047W                 | RGD2          |
| YGL237C                                          | HAP2          | YGL253W                 | HXK2          |
| YER087C-B                                        | SBH1          | YLR292C                 | SEC72         |
| YML095C                                          | RAD10         | YDR155C                 | CPR1          |
| YPL240C                                          | HSP82         | YER102W                 | RPS8B         |
| YLR234W                                          | TOP3          | YDR310C                 | SUM1          |
| YJR060W                                          | CBF1          | YNL051W                 | COG5          |
| YNL087W                                          | TCB2          | YBL103C                 | RTG3          |
| YNL025C                                          | SSN8          | YEL013W                 | VAC8          |
| YGR261C                                          | APL6          | YBL102W                 | SFT2          |

| Predictions at threshold level 0.80 continued... |               |                         |               |
|--------------------------------------------------|---------------|-------------------------|---------------|
| Gene1 of predicted pair                          |               | Gene2 of predicted pair |               |
| Systematic Name                                  | Standard Name | Systematic Name         | Standard Name |
| YPL161C                                          | BEM4          | YML001W                 | YPT7          |
| YDR293C                                          | SSD1          | YGL252C                 | RTG2          |
| YLR288C                                          | MEC3          | YOR038C                 | HIR2          |
| YBL088C                                          | TEL1          | YLR079W                 | SIC1          |
| YGL006W                                          | PMC1          | YLR043C                 | TRX1          |
| YGL115W                                          | SNF4          | YER162C                 | RAD4          |
| YFL013C                                          | IES1          | YPR119W                 | CLB2          |
| YGR217W                                          | CCH1          | YJL183W                 | MNN11         |
| YJR140C                                          | HIR3          | YHR039C-A               | VMA10         |
| YNL025C                                          | SSN8          | YFL013C                 | IES1          |
| YNL238W                                          | KEX2          | YLR371W                 | ROM2          |
| YML103C                                          | NUP188        | YNR052C                 | POP2          |
| YGR019W                                          | UGA1          | YDL155W                 | CLB3          |
| YJL127C                                          | SPT10         | YDL155W                 | CLB3          |
| YMR080C                                          | NAM7          | YOR243C                 | PUS7          |
| YLR234W                                          | TOP3          | YJR032W                 | CPR7          |
| YBL047C                                          | EDE1          | YCR077C                 | PAT1          |
| YLR337C                                          | VRP1          | YBL101C                 | ECM21         |
| YDR456W                                          | NHX1          | YPL161C                 | BEM4          |
| YDR245W                                          | MNN10         | YHR200W                 | RPN10         |
| YMR142C                                          | RPL13B        | YEL053C                 | MAK10         |
| YJL124C                                          | LSM1          | YEL013W                 | VAC8          |
| YLR095C                                          | IOC2          | YKL126W                 | YPK1          |
| YDL160C                                          | DHH1          | YPR120C                 | CLB5          |
| YNL215W                                          | IES2          | YML103C                 | NUP188        |
| YLR381W                                          | CTF3          | YJR090C                 | GRR1          |
| YJR135C                                          | MCM22         | YDR310C                 | SUM1          |
| YOR033C                                          | EXO1          | YNL016W                 | PUB1          |
| YKR020W                                          | VPS51         | YPL120W                 | VPS30         |

| Predictions at threshold level 0.80 continued... |               |                         |               |
|--------------------------------------------------|---------------|-------------------------|---------------|
| Gene1 of predicted pair                          |               | Gene2 of predicted pair |               |
| Systematic Name                                  | Standard Name | Systematic Name         | Standard Name |
| YPR036W                                          | VMA13         | YLR180W                 | SAM1          |
| YNL069C                                          | RPL16B        | YNL127W                 | FAR11         |
| YJR040W                                          | GEF1          | YGL054C                 | ERV14         |
| YBR289W                                          | SNF5          | YBR009C                 | HHF1          |
| YDR484W                                          | VPS52         | YER162C                 | RAD4          |
| YML016C                                          | PPZ1          | YFR036W                 | CDC26         |
| YDR225W                                          | HTA1          | YPL253C                 | VIK1          |
| YDR004W                                          | RAD57         | YPR046W                 | MCM16         |
| YOR312C                                          | RPL20B        | YOR014W                 | RTS1          |
| YFL026W                                          | STE2          | YDR358W                 | GGA1          |
| YJL136C                                          | RPS21B        | YDR264C                 | AKR1          |
| YDR202C                                          | RAV2          | YPL161C                 | BEM4          |
| YLR006C                                          | SSK1          | YJL187C                 | SWE1          |
| YML095C                                          | RAD10         | YKL101W                 | HSL1          |
| YNL264C                                          | PDR17         | YKL041W                 | VPS24         |
| YGL078C                                          | DBP3          | YKL126W                 | YPK1          |
| YKL032C                                          | IXR1          | YGL200C                 | EMP24         |
| YIR005W                                          | IST3          | YER122C                 | GLO3          |
| YGR184C                                          | UBR1          | YPL253C                 | VIK1          |
| YDR137W                                          | RGP1          | YGR071C                 | YGR071C       |
| YOR066W                                          | MSA1          | YJL183W                 | MNN11         |
| YNL309W                                          | STB1          | YLR182W                 | SWI6          |
| YMR198W                                          | CIK1          | YIL036W                 | CST6          |
| YBR217W                                          | ATG12         | YML071C                 | COG8          |
| YKL025C                                          | PAN3          | YLR360W                 | VPS38         |
| YNL243W                                          | SLA2          | YJL030W                 | MAD2          |
| YOR109W                                          | INP53         | YOR036W                 | PEP12         |
| YML057W                                          | CMP2          | YPR119W                 | CLB2          |
| YML071C                                          | COG8          | YLR398C                 | SKI2          |



| Predictions at threshold level 0.80 continued... |               |                         |               |
|--------------------------------------------------|---------------|-------------------------|---------------|
| Gene1 of predicted pair                          |               | Gene2 of predicted pair |               |
| Systematic Name                                  | Standard Name | Systematic Name         | Standard Name |
| YHR161C                                          | YAP1801       | YJL029C                 | VPS53         |
| YKR099W                                          | BAS1          | YLR180W                 | SAM1          |
| YMR198W                                          | CIK1          | YPR036W                 | VMA13         |
| YLR234W                                          | TOP3          | YCR066W                 | RAD18         |
| YLR429W                                          | CRN1          | YPR120C                 | CLB5          |
| YDR378C                                          | LSM6          | YNL116W                 | DMA2          |
| YLR292C                                          | SEC72         | YDR144C                 | MKC7          |
| YNL069C                                          | RPL16B        | YHL031C                 | GOS1          |
| YJR058C                                          | APS2          | YDR358W                 | GGA1          |
| YJL127C                                          | SPT10         | YBR200W                 | BEM1          |
| YJR090C                                          | GRR1          | YMR038C                 | CCS1          |
| YER116C                                          | SLX8          | YCR053W                 | THR4          |
| YDL002C                                          | NHP10         | YPR120C                 | CLB5          |
| YJR063W                                          | RPA12         | YPL152W                 | RRD2          |
| YNL238W                                          | KEX2          | YJL183W                 | MNN11         |
| YML095C                                          | RAD10         | YDR379W                 | RGA2          |
| YIL053W                                          | RHR2          | YDR310C                 | SUM1          |
| YML071C                                          | COG8          | YKR030W                 | GMH1          |
| YPL195W                                          | APL5          | YNL107W                 | YAF9          |
| YDR289C                                          | RTT103        | YER139C                 | YER139C       |
| YDR227W                                          | SIR4          | YBR010W                 | HHT1          |
| YDR261C                                          | EXG2          | YDR207C                 | UME6          |
| YNL031C                                          | HHT2          | YNL030W                 | HHF2          |
| YNL291C                                          | MID1          | YAR014C                 | BUD14         |
| YGL253W                                          | HXK2          | YAR014C                 | BUD14         |
| YMR319C                                          | FET4          | YFL044C                 | OTU1          |
| YPR017C                                          | DSS4          | YGR020C                 | VMA7          |
| YPR120C                                          | CLB5          | YDR183W                 | PLP1          |
| YPL253C                                          | VIK1          | YBR114W                 | RAD16         |

| Predictions at threshold level 0.80 continued... |               |                         |               |
|--------------------------------------------------|---------------|-------------------------|---------------|
| Gene1 of predicted pair                          |               | Gene2 of predicted pair |               |
| Systematic Name                                  | Standard Name | Systematic Name         | Standard Name |
| YNL106C                                          | INP52         | YFR030W                 | MET10         |
| YDR484W                                          | VPS52         | YER144C                 | UBP5          |
| YAL024C                                          | LTE1          | YLR452C                 | SST2          |
| YJR060W                                          | CBF1          | YNR032W                 | PPG1          |
| YLR148W                                          | PEP3          | YLR093C                 | NYV1          |
| YGR019W                                          | UGA1          | YKL048C                 | ELM1          |
| YFR040W                                          | SAP155        | YHL027W                 | RIM101        |
| YBR010W                                          | HHT1          | YNL107W                 | YAF9          |
| YPL253C                                          | VIK1          | YAL010C                 | MDM10         |
| YPL037C                                          | EGD1          | YNL107W                 | YAF9          |
| YMR198W                                          | CIK1          | YLR452C                 | SST2          |
| YOR312C                                          | RPL20B        | YBL101C                 | ECM21         |
| YDR144C                                          | MKC7          | YDR289C                 | RTT103        |
| YGL087C                                          | MMS2          | YJR035W                 | RAD26         |
| YPR084W                                          | YPR084W       | YDR320C                 | SWA2          |
| YKR001C                                          | VPS1          | YDL006W                 | PTC1          |
| YGL100W                                          | SEH1          | YNL273W                 | TOF1          |
| YHR073W                                          | OSH3          | YMR164C                 | MSS11         |
| YLR079W                                          | SIC1          | YNL107W                 | YAF9          |
| YNL218W                                          | MGS1          | YDR207C                 | UME6          |
| YLR337C                                          | VRP1          | YBL047C                 | EDE1          |
| YBL058W                                          | SHP1          | YKR099W                 | BAS1          |
| YNL223W                                          | ATG4          | YLR093C                 | NYV1          |
| YNL106C                                          | INP52         | YPR120C                 | CLB5          |
| YML038C                                          | YMD8          | YER162C                 | RAD4          |
| YOL111C                                          | MDY2          | YMR133W                 | REC114        |
| YDL184C                                          | RPL41A        | YER044C                 | ERG28         |
| YBL047C                                          | EDE1          | YHR108W                 | GGA2          |
| YOR127W                                          | RGA1          | YBR114W                 | RAD16         |

| Predictions at threshold level 0.80 continued... |               |                         |               |
|--------------------------------------------------|---------------|-------------------------|---------------|
| Gene1 of predicted pair                          |               | Gene2 of predicted pair |               |
| Systematic Name                                  | Standard Name | Systematic Name         | Standard Name |
| YDR456W                                          | NHX1          | YDR207C                 | UME6          |
| YMR205C                                          | PFK2          | YPL089C                 | RLM1          |
| YDR192C                                          | NUP42         | YJR090C                 | GRR1          |
| YKR020W                                          | VPS51         | YJR060W                 | CBF1          |
| YKL139W                                          | CTK1          | YJR135C                 | MCM22         |
| YPL195W                                          | APL5          | YBR036C                 | CSG2          |
| YNL307C                                          | MCK1          | YHR039C-A               | VMA10         |
| YBR200W                                          | BEM1          | YNL166C                 | BNI5          |
| YBR107C                                          | IML3          | YJR135C                 | MCM22         |
| YNL243W                                          | SLA2          | YKL079W                 | SMY1          |
| YMR133W                                          | REC114        | YBR280C                 | SAF1          |
| YDR137W                                          | RGP1          | YJR032W                 | CPR7          |
| YNL243W                                          | SLA2          | YCR077C                 | PAT1          |
| YKL110C                                          | KTI12         | YDR289C                 | RTT103        |
| YDL116W                                          | NUP84         | YBR228W                 | SLX1          |
| YJR010C-A                                        | SPC1          | YER019C-A               | SBH2          |
| YLR301W                                          | YLR301W       | YBR171W                 | SEC66         |
| YEL065W                                          | SIT1          | YMR153W                 | NUP53         |
| YBR108W                                          | YBR108W       | YDL192W                 | ARF1          |
| YHR084W                                          | STE12         | YER109C                 | FLO8          |
| YHR012W                                          | VPS29         | YOL067C                 | RTG1          |
| YMR216C                                          | SKY1          | YGL115W                 | SNF4          |
| YIL076W                                          | SEC28         | YNL127W                 | FAR11         |
| YBR200W                                          | BEM1          | YLR381W                 | CTF3          |
| YNL166C                                          | BNI5          | YAL002W                 | VPS8          |
| YML095C                                          | RAD10         | YPR046W                 | MCM16         |
| YDR155C                                          | CPR1          | YHR115C                 | DMA1          |
| YBR108W                                          | YBR108W       | YHR012W                 | VPS29         |
| YPL253C                                          | VIK1          | YJL095W                 | BCK1          |

| Predictions at threshold level 0.80 continued... |               |                         |               |
|--------------------------------------------------|---------------|-------------------------|---------------|
| Gene1 of predicted pair                          |               | Gene2 of predicted pair |               |
| Systematic Name                                  | Standard Name | Systematic Name         | Standard Name |
| YBR173C                                          | UMP1          | YKR099W                 | BAS1          |
| YDL020C                                          | RPN4          | YPR036W                 | VMA13         |
| YHR203C                                          | RPS4B         | YBL072C                 | RPS8A         |
| YKL025C                                          | PAN3          | YDR183W                 | PLP1          |
| YMR026C                                          | PEX12         | YPL057C                 | SUR1          |
| YBL088C                                          | TEL1          | YGL090W                 | LIF1          |
| YLR135W                                          | SLX4          | YGL175C                 | SAE2          |
| YDR485C                                          | VPS72         | YBR089C-A               | NHP6B         |
| YDR200C                                          | VPS64         | YDL226C                 | GCS1          |
| YDR335W                                          | MSN5          | YJR060W                 | CBF1          |
| YOR033C                                          | EXO1          | YBR215W                 | HPC2          |
| YKL126W                                          | YPK1          | YJL183W                 | MNN11         |
| YPL024W                                          | RMI1          | YBR030W                 | YBR030W       |
| YFR010W                                          | UBP6          | YML115C                 | VAN1          |
| YBL025W                                          | RRN10         | YMR230W                 | RPS10B        |
| YPR171W                                          | BSP1          | YJL095W                 | BCK1          |
| YDR144C                                          | MKC7          | YGL124C                 | MON1          |
| YGR104C                                          | SRB5          | YJL140W                 | RPB4          |
| YCR081W                                          | SRB8          | YDR477W                 | SNF1          |
| YLR170C                                          | APS1          | YOR035C                 | SHE4          |
| YMR055C                                          | BUB2          | YGL148W                 | ARO2          |
| YPR084W                                          | YPR084W       | YHL031C                 | GOS1          |
| YNL199C                                          | GCR2          | YGL016W                 | KAP122        |
| YML016C                                          | PPZ1          | YAL002W                 | VPS8          |
| YOR197W                                          | MCA1          | YLL017W                 | YLL017W       |
| YDR202C                                          | RAV2          | YLR447C                 | VMA6          |
| YGR104C                                          | SRB5          | YCR081W                 | SRB8          |
| YLR452C                                          | SST2          | YNL076W                 | MKS1          |
| YJR063W                                          | RPA12         | YCR086W                 | CSM1          |

| Predictions at threshold level 0.80 continued... |               |                         |               |
|--------------------------------------------------|---------------|-------------------------|---------------|
| Gene1 of predicted pair                          |               | Gene2 of predicted pair |               |
| Systematic Name                                  | Standard Name | Systematic Name         | Standard Name |
| YBR107C                                          | IML3          | YGL253W                 | HXK2          |
| YNL166C                                          | BNI5          | YNL078W                 | NIS1          |
| YGR104C                                          | SRB5          | YDL106C                 | PHO2          |
| YFR010W                                          | UBP6          | YNL082W                 | PMS1          |
| YKR099W                                          | BAS1          | YDR358W                 | GGA1          |
| YNL236W                                          | SIN4          | YGL003C                 | CDH1          |
| YHR134W                                          | WSS1          | YPL161C                 | BEM4          |
| YCL037C                                          | SRO9          | YOR327C                 | SNC2          |
| YBR126C                                          | TPS1          | YDR261C                 | EXG2          |
| YLR240W                                          | VPS34         | YOR035C                 | SHE4          |
| YMR199W                                          | CLN1          | YOR275C                 | RIM20         |
| YDR080W                                          | VPS41         | YNL107W                 | YAF9          |
| YNL307C                                          | MCK1          | YBR036C                 | CSG2          |
| YDR323C                                          | PEP7          | YDL226C                 | GCS1          |
| YOR033C                                          | EXO1          | YMR116C                 | ASC1          |
| YDR108W                                          | GSG1          | YLR447C                 | VMA6          |
| YML016C                                          | PPZ1          | YPL152W                 | RRD2          |
| YNL068C                                          | FKH2          | YOR275C                 | RIM20         |
| YJR135C                                          | MCM22         | YMR038C                 | CCS1          |
| YDR335W                                          | MSN5          | YDR076W                 | RAD55         |
| YHR200W                                          | RPN10         | YKL101W                 | HSL1          |
| YFL023W                                          | BUD27         | YOR327C                 | SNC2          |
| YPL022W                                          | RAD1          | YBL079W                 | NUP170        |
| YNL215W                                          | IES2          | YKL160W                 | ELF1          |
| YMR224C                                          | MRE11         | YHR134W                 | WSS1          |
| YLR095C                                          | IOC2          | YBL025W                 | RRN10         |
| YLR079W                                          | SIC1          | YNL054W                 | VAC7          |
| YJL095W                                          | BCK1          | YOL081W                 | IRA2          |
| YDR484W                                          | VPS52         | YCR088W                 | ABP1          |

| Predictions at threshold level 0.80 continued... |               |                         |               |
|--------------------------------------------------|---------------|-------------------------|---------------|
| Gene1 of predicted pair                          |               | Gene2 of predicted pair |               |
| Systematic Name                                  | Standard Name | Systematic Name         | Standard Name |
| YHR060W                                          | VMA22         | YJR084W                 | CSN12         |
| YPL105C                                          | YPL105C       | YGR105W                 | VMA21         |
| YGR249W                                          | MGA1          | YNL307C                 | MCK1          |
| YDR245W                                          | MNN10         | YPR120C                 | CLB5          |
| YLR386W                                          | VAC14         | YOR290C                 | SNF2          |
| YIL159W                                          | BNR1          | YBR280C                 | SAF1          |
| YOR127W                                          | RGA1          | YKR048C                 | NAP1          |
| YML016C                                          | PPZ1          | YPL158C                 | YPL158C       |
| YNL243W                                          | SLA2          | YMR202W                 | ERG2          |
| YML103C                                          | NUP188        | YNL225C                 | CNM67         |
| YDL116W                                          | NUP84         | YPR120C                 | CLB5          |
| YGL223C                                          | COG1          | YNL107W                 | YAF9          |
| YOR358W                                          | HAP5          | YEL053C                 | MAK10         |
| YBR030W                                          | YBR030W       | YML115C                 | VAN1          |
| YKR001C                                          | VPS1          | YMR054W                 | STV1          |
| YOR076C                                          | SKI7          | YNR052C                 | POP2          |
| YKL007W                                          | CAP1          | YNL069C                 | RPL16B        |
| YLR090W                                          | XDJ1          | YOR066W                 | MSA1          |
| YER161C                                          | SPT2          | YAL002W                 | VPS8          |
| YHR012W                                          | VPS29         | YPL195W                 | APL5          |
| YKL007W                                          | CAP1          | YPL050C                 | MNN9          |
| YKL191W                                          | DPH2          | YIL103W                 | DPH1          |
| YDR146C                                          | SWI5          | YDL155W                 | CLB3          |
| YPR046W                                          | MCM16         | YDL077C                 | VAM6          |
| YJR063W                                          | RPA12         | YAR014C                 | BUD14         |
| YDL013W                                          | SLX5          | YDR318W                 | MCM21         |
| YBR009C                                          | HHF1          | YEL056W                 | HAT2          |
| YKR072C                                          | SIS2          | YPL022W                 | RAD1          |
| YPR084W                                          | YPR084W       | YGL174W                 | BUD13         |

| Predictions at threshold level 0.80 continued... |               |                         |               |
|--------------------------------------------------|---------------|-------------------------|---------------|
| Gene1 of predicted pair                          |               | Gene2 of predicted pair |               |
| Systematic Name                                  | Standard Name | Systematic Name         | Standard Name |
| YNL166C                                          | BNI5          | YHL002W                 | HSE1          |
| YLR288C                                          | MEC3          | YBR036C                 | CSG2          |
| YBR042C                                          | CST26         | YAL055W                 | PEX22         |
| YJL053W                                          | PEP8          | YPR032W                 | SRO7          |
| YDL223C                                          | HBT1          | YMR089C                 | YTA12         |
| YKL139W                                          | CTK1          | YNL199C                 | GCR2          |
| YMR032W                                          | HOF1          | YER118C                 | SHO1          |
| YGL178W                                          | MPT5          | YLL021W                 | SPA2          |
| YDR484W                                          | VPS52         | YGL025C                 | PGD1          |
| YDR174W                                          | HMO1          | YML103C                 | NUP188        |
| YDR289C                                          | RTT103        | YAL002W                 | VPS8          |
| YHR178W                                          | STB5          | YNL166C                 | BNI5          |
| YPL057C                                          | SUR1          | YHR081W                 | LRP1          |
| YKR059W                                          | TIF1          | YOL045W                 | PSK2          |
| YDL013W                                          | SLX5          | YBL079W                 | NUP170        |
| YBR171W                                          | SEC66         | YDL223C                 | HBT1          |
| YBR112C                                          | CYC8          | YGR252W                 | GCN5          |
| YML028W                                          | TSA1          | YKL114C                 | APN1          |
| YMR091C                                          | NPL6          | YHL025W                 | SNF6          |
| YDR080W                                          | VPS41         | YNR032W                 | PPG1          |
| YIL159W                                          | BNR1          | YJR084W                 | CSN12         |
| YNL093W                                          | YPT53         | YBR264C                 | YPT10         |
| YHR039C-A                                        | VMA10         | YNL107W                 | YAF9          |
| YBR215W                                          | HPC2          | YJL006C                 | CTK2          |
| YDR108W                                          | GSG1          | YEL043W                 | YEL043W       |
| YPR120C                                          | CLB5          | YJL157C                 | FAR1          |
| YDR293C                                          | SSD1          | YNL135C                 | FPR1          |
| YBR274W                                          | CHK1          | YEL056W                 | HAT2          |
| YGR072W                                          | UPF3          | YPL079W                 | RPL21B        |

| Predictions at threshold level 0.80 continued... |               |                         |               |
|--------------------------------------------------|---------------|-------------------------|---------------|
| Gene1 of predicted pair                          |               | Gene2 of predicted pair |               |
| Systematic Name                                  | Standard Name | Systematic Name         | Standard Name |
| YGL078C                                          | DBP3          | YBR019C                 | GAL10         |
| YLR079W                                          | SIC1          | YNR052C                 | POP2          |
| YER116C                                          | SLX8          | YDR207C                 | UME6          |
| YPL057C                                          | SUR1          | YKL160W                 | ELF1          |
| YDR004W                                          | RAD57         | YDR192C                 | NUP42         |
| YLR094C                                          | GIS3          | YDR207C                 | UME6          |
| YGR071C                                          | YGR071C       | YER122C                 | GLO3          |
| YFL023W                                          | BUD27         | YML028W                 | TSA1          |
| YDR245W                                          | MNN10         | YOR014W                 | RTS1          |
| YER116C                                          | SLX8          | YNL248C                 | RPA49         |
| YHR086W                                          | NAM8          | YMR133W                 | REC114        |
| YEL065W                                          | SIT1          | YPL057C                 | SUR1          |
| YDR443C                                          | SSN2          | YDL184C                 | RPL41A        |
| YPL161C                                          | BEM4          | YJL117W                 | PHO86         |
| YJL176C                                          | SWI3          | YHL002W                 | HSE1          |
| YDR293C                                          | SSD1          | YBR107C                 | IML3          |
| YMR004W                                          | MVP1          | YHR060W                 | VMA22         |
| YDR183W                                          | PLP1          | YHL002W                 | HSE1          |
| YMR104C                                          | YPK2          | YOL100W                 | PKH2          |
| YGL025C                                          | PGD1          | YKL048C                 | ELM1          |
| YDR146C                                          | SWI5          | YOR008C                 | SLG1          |
| YGR239C                                          | PEX21         | YDL065C                 | PEX19         |
| YHL031C                                          | GOS1          | YPL057C                 | SUR1          |
| YDR484W                                          | VPS52         | YNR072W                 | HXT17         |
| YMR052W                                          | FAR3          | YDL047W                 | SIT4          |
| YGL133W                                          | ITC1          | YGL031C                 | RPL24A        |
| YDL116W                                          | NUP84         | YOR080W                 | DIA2          |
| YHR039C-A                                        | VMA10         | YPL120W                 | VPS30         |
| YOR033C                                          | EXO1          | YDR156W                 | RPA14         |



| Predictions at threshold level 0.80 continued... |               |                         |               |
|--------------------------------------------------|---------------|-------------------------|---------------|
| Gene1 of predicted pair                          |               | Gene2 of predicted pair |               |
| Systematic Name                                  | Standard Name | Systematic Name         | Standard Name |
| YLR240W                                          | VPS34         | YKR020W                 | VPS51         |
| YBL008W                                          | HIR1          | YNL031C                 | HHT2          |
| YDR335W                                          | MSN5          | YLR350W                 | ORM2          |
| YOL018C                                          | TLG2          | YEL042W                 | GDA1          |
| YDL160C                                          | DHH1          | YGR054W                 | YGR054W       |
| YBR030W                                          | YBR030W       | YPR046W                 | MCM16         |
| YGL163C                                          | RAD54         | YPL018W                 | CTF19         |
| YIL076W                                          | SEC28         | YFL023W                 | BUD27         |
| YCR086W                                          | CSM1          | YHR115C                 | DMA1          |
| YNL206C                                          | RTT106        | YBL047C                 | EDE1          |
| YOR038C                                          | HIR2          | YNL107W                 | YAF9          |
| YHR134W                                          | WSS1          | YOL067C                 | RTG1          |
| YNR052C                                          | POP2          | YPL253C                 | VIK1          |
| YJR135C                                          | MCM22         | YJR035W                 | RAD26         |
| YOR358W                                          | HAP5          | YJL190C                 | RPS22A        |
| YDR155C                                          | CPR1          | YHL002W                 | HSE1          |
| YNL166C                                          | BNI5          | YEL056W                 | HAT2          |
| YPL137C                                          | GIP3          | YFR036W                 | CDC26         |
| YGL066W                                          | SGF73         | YLR410W                 | VIP1          |
| YDR335W                                          | MSN5          | YAL002W                 | VPS8          |
| YBR280C                                          | SAF1          | YEL060C                 | PRB1          |
| YOR069W                                          | VPS5          | YGR020C                 | VMA7          |
| YLR018C                                          | POM34         | YML115C                 | VAN1          |
| YDL077C                                          | VAM6          | YOL081W                 | IRA2          |
| YLR447C                                          | VMA6          | YJR032W                 | CPR7          |
| YDR484W                                          | VPS52         | YMR133W                 | REC114        |
| YPL024W                                          | RMI1          | YBR036C                 | CSG2          |
| YNL307C                                          | MCK1          | YNL076W                 | MKS1          |
| YOR039W                                          | CKB2          | YGL019W                 | CKB1          |

| Predictions at threshold level 0.80 continued... |               |                         |               |
|--------------------------------------------------|---------------|-------------------------|---------------|
| Gene1 of predicted pair                          |               | Gene2 of predicted pair |               |
| Systematic Name                                  | Standard Name | Systematic Name         | Standard Name |
| YPL129W                                          | TAF14         | YDR477W                 | SNF1          |
| YOR290C                                          | SNF2          | YJR063W                 | RPA12         |
| YAL014C                                          | SYN8          | YLR093C                 | NYV1          |
| YPR131C                                          | NAT3          | YML028W                 | TSA1          |
| YLR018C                                          | POM34         | YGR059W                 | SPR3          |
| YOL111C                                          | MDY2          | YDL083C                 | RPS16B        |
| YJL176C                                          | SWI3          | YBL025W                 | RRN10         |
| YJR135C                                          | MCM22         | YHR115C                 | DMA1          |
| YDR443C                                          | SSN2          | YKL048C                 | ELM1          |
| YPR131C                                          | NAT3          | YBR107C                 | IML3          |
| YOR127W                                          | RGA1          | YDR318W                 | MCM21         |
| YDL223C                                          | HBT1          | YPL195W                 | APL5          |
| YOR032C                                          | HMS1          | YML062C                 | MFT1          |
| YGR019W                                          | UGA1          | YGL124C                 | MON1          |
| YLR292C                                          | SEC72         | YLR234W                 | TOP3          |
| YDL116W                                          | NUP84         | YJR135C                 | MCM22         |
| YOR054C                                          | VHS3          | YKL113C                 | RAD27         |
| YLR079W                                          | SIC1          | YBR194W                 | SOY1          |
| YOR043W                                          | WHI2          | YML001W                 | YPT7          |
| YGR184C                                          | UBR1          | YPL248C                 | GAL4          |
| YBR084C-A                                        | RPL19A        | YHR115C                 | DMA1          |
| YJL117W                                          | PHO86         | YBL101C                 | ECM21         |
| YMR224C                                          | MRE11         | YGL212W                 | VAM7          |
| YCR020C-A                                        | MAK31         | YMR216C                 | SKY1          |
| YLR337C                                          | VRP1          | YBR107C                 | IML3          |
| YOR132W                                          | VPS17         | YLR309C                 | IMH1          |
| YDL047W                                          | SIT4          | YOL091W                 | SPO21         |
| YHR178W                                          | STB5          | YOL081W                 | IRA2          |
| YNL054W                                          | VAC7          | YKL048C                 | ELM1          |

| Predictions at threshold level 0.80 continued... |               |                         |               |
|--------------------------------------------------|---------------|-------------------------|---------------|
| Gene1 of predicted pair                          |               | Gene2 of predicted pair |               |
| Systematic Name                                  | Standard Name | Systematic Name         | Standard Name |
| YDR440W                                          | DOT1          | YOL081W                 | IRA2          |
| YER144C                                          | UBP5          | YGL124C                 | MON1          |
| YOR368W                                          | RAD17         | YLR032W                 | RAD5          |
| YDR293C                                          | SSD1          | YLR309C                 | IMH1          |
| YER139C                                          | YER139C       | YMR038C                 | CCS1          |
| YBR171W                                          | SEC66         | YPL018W                 | CTF19         |
| YDR004W                                          | RAD57         | YDR289C                 | RTT103        |
| YOR351C                                          | MEK1          | YLR263W                 | RED1          |
| YEL065W                                          | SIT1          | YBL103C                 | RTG3          |
| YLR360W                                          | VPS38         | YHR134W                 | WSS1          |
| YML095C                                          | RAD10         | YML028W                 | TSA1          |
| YJL136C                                          | RPS21B        | YHR152W                 | SPO12         |
| YLR090W                                          | XDJ1          | YOL081W                 | IRA2          |
| YDL223C                                          | HBT1          | YER122C                 | GLO3          |
| YDL059C                                          | RAD59         | YKR001C                 | VPS1          |
| YJL183W                                          | MNN11         | YEL056W                 | HAT2          |
| YKR057W                                          | RPS21A        | YHR111W                 | UBA4          |
| YGR135W                                          | PRE9          | YHL002W                 | HSE1          |
| YDR293C                                          | SSD1          | YCR066W                 | RAD18         |
| YKR099W                                          | BAS1          | YDL083C                 | RPS16B        |
| YOR337W                                          | TEA1          | YLR386W                 | VAC14         |
| YIL159W                                          | BNR1          | YNL076W                 | MKS1          |
| YLR452C                                          | SST2          | YMR133W                 | REC114        |
| YNR052C                                          | POP2          | YOL030W                 | GAS5          |
| YDR289C                                          | RTT103        | YGL031C                 | RPL24A        |
| YML016C                                          | PPZ1          | YDR363W-A               | SEM1          |
| YDR265W                                          | PEX10         | YPR119W                 | CLB2          |
| YNR072W                                          | HXT17         | YDL083C                 | RPS16B        |
| YFR010W                                          | UBP6          | YOL051W                 | GAL11         |

| Predictions at threshold level 0.80 continued... |               |                         |               |
|--------------------------------------------------|---------------|-------------------------|---------------|
| Gene1 of predicted pair                          |               | Gene2 of predicted pair |               |
| Systematic Name                                  | Standard Name | Systematic Name         | Standard Name |
| YHR073W                                          | OSH3          | YER115C                 | SPR6          |
| YDR146C                                          | SWI5          | YBR036C                 | CSG2          |
| YAL020C                                          | ATS1          | YDR309C                 | GIC2          |
| YLR360W                                          | VPS38         | YPL105C                 | YPL105C       |
| YHR156C                                          | LIN1          | YKL139W                 | CTK1          |
| YLR381W                                          | CTF3          | YPL106C                 | SSE1          |
| YIL034C                                          | CAP2          | YJL187C                 | SWE1          |
| YAL024C                                          | LTE1          | YLR399C                 | BDF1          |
| YLR386W                                          | VAC14         | YLR381W                 | CTF3          |
| YMR116C                                          | ASC1          | YLR425W                 | TUS1          |
| YLR386W                                          | VAC14         | YLR399C                 | BDF1          |
| YOL030W                                          | GAS5          | YBL079W                 | NUP170        |
| YIL053W                                          | RHR2          | YBL058W                 | SHP1          |
| YNL215W                                          | IES2          | YOR195W                 | SLK19         |
| YLR094C                                          | GIS3          | YER122C                 | GLO3          |
| YGR056W                                          | RSC1          | YBR089C-A               | NHP6B         |
| YDR335W                                          | MSN5          | YOR308C                 | SNU66         |
| YMR039C                                          | SUB1          | YNL215W                 | IES2          |
| YOR290C                                          | SNF2          | YNR023W                 | SNF12         |
| YJR056C                                          | YJR056C       | YDL077C                 | VAM6          |
| YPR017C                                          | DSS4          | YJL004C                 | SYS1          |
| YHR111W                                          | UBA4          | YPL256C                 | CLN2          |
| YER162C                                          | RAD4          | YER139C                 | YER139C       |
| YLR058C                                          | SHM2          | YPL018W                 | CTF19         |
| YOR270C                                          | VPH1          | YPL037C                 | EGD1          |
| YAL024C                                          | LTE1          | YLR320W                 | MMS22         |
| YOR327C                                          | SNC2          | YHR115C                 | DMA1          |
| YBR084C-A                                        | RPL19A        | YKL048C                 | ELM1          |
| YOR035C                                          | SHE4          | YBR082C                 | UBC4          |

| Predictions at threshold level 0.80 continued... |               |                         |               |
|--------------------------------------------------|---------------|-------------------------|---------------|
| Gene1 of predicted pair                          |               | Gene2 of predicted pair |               |
| Systematic Name                                  | Standard Name | Systematic Name         | Standard Name |
| YKR020W                                          | VPS51         | YOR312C                 | RPL20B        |
| YPL022W                                          | RAD1          | YBR082C                 | UBC4          |
| YBR057C                                          | MUM2          | YOR195W                 | SLK19         |
| YIL034C                                          | CAP2          | YMR172W                 | HOT1          |
| YPR036W                                          | VMA13         | YML001W                 | YPT7          |
| YKL139W                                          | CTK1          | YJR084W                 | CSN12         |
| YCL001W                                          | RER1          | YML071C                 | COG8          |
| YPR052C                                          | NHP6A         | YOR039W                 | CKB2          |
| YML016C                                          | PPZ1          | YGL250W                 | RMR1          |
| YGL200C                                          | EMP24         | YJL006C                 | CTK2          |
| YHR111W                                          | UBA4          | YNL293W                 | MSB3          |
| YNL291C                                          | MID1          | YDR202C                 | RAV2          |
| YMR039C                                          | SUB1          | YEL056W                 | HAT2          |
| YMR231W                                          | PEP5          | YPL045W                 | VPS16         |
| YBR171W                                          | SEC66         | YER044C                 | ERG28         |
| YPL042C                                          | SSN3          | YKL213C                 | DOA1          |
| YBR173C                                          | UMP1          | YOR290C                 | SNF2          |
| YDL101C                                          | DUN1          | YLR313C                 | SPH1          |
| YOR290C                                          | SNF2          | YKL048C                 | ELM1          |
| YGR019W                                          | UGA1          | YGL237C                 | HAP2          |
| YHR039C-A                                        | VMA10         | YKR030W                 | GMH1          |
| YDR293C                                          | SSD1          | YBL088C                 | TEL1          |
| YHR200W                                          | RPN10         | YBR082C                 | UBC4          |
| YBR217W                                          | ATG12         | YHR081W                 | LRP1          |
| YLR090W                                          | XDJ1          | YGL078C                 | DBP3          |
| YGL078C                                          | DBP3          | YNL307C                 | MCK1          |
| YPR017C                                          | DSS4          | YDR293C                 | SSD1          |
| YBR188C                                          | NTC20         | YIR009W                 | MSL1          |
| YPR018W                                          | RLF2          | YOR195W                 | SLK19         |

| Predictions at threshold level 0.80 continued... |               |                         |               |
|--------------------------------------------------|---------------|-------------------------|---------------|
| Gene1 of predicted pair                          |               | Gene2 of predicted pair |               |
| Systematic Name                                  | Standard Name | Systematic Name         | Standard Name |
| YPL018W                                          | CTF19         | YPR119W                 | CLB2          |
| YKR001C                                          | VPS1          | YJR035W                 | RAD26         |
| YGR072W                                          | UPF3          | YDR320C                 | SWA2          |
| YBL051C                                          | PIN4          | YLR233C                 | EST1          |
| YOR023C                                          | AHC1          | YDR155C                 | CPR1          |
| YCR086W                                          | CSM1          | YGL148W                 | ARO2          |
| YPR029C                                          | APL4          | YAL030W                 | SNC1          |
| YAL024C                                          | LTE1          | YBR173C                 | UMP1          |
| YOR195W                                          | SLK19         | YPL256C                 | CLN2          |
| YGL190C                                          | CDC55         | YLR200W                 | YKE2          |
| YPL256C                                          | CLN2          | YLR131C                 | ACE2          |
| YPL037C                                          | EGD1          | YMR311C                 | GLC8          |
| YDL116W                                          | NUP84         | YDR174W                 | HMO1          |
| YMR198W                                          | CIK1          | YHR012W                 | VPS29         |
| YLR386W                                          | VAC14         | YER110C                 | KAP123        |
| YIL103W                                          | DPH1          | YFR036W                 | CDC26         |
| YOR337W                                          | TEA1          | YML115C                 | VAN1          |
| YPR084W                                          | YPR084W       | YOR124C                 | UBP2          |
| YFR030W                                          | MET10         | YML112W                 | CTK3          |
| YLL039C                                          | UBI4          | YOR312C                 | RPL20B        |
| YDR439W                                          | LRS4          | YGR188C                 | BUB1          |
| YKL139W                                          | CTK1          | YOR124C                 | UBP2          |
| YBR057C                                          | MUM2          | YMR055C                 | BUB2          |
| YJL154C                                          | VPS35         | YBL051C                 | PIN4          |
| YDR439W                                          | LRS4          | YJL006C                 | CTK2          |
| YDR244W                                          | PEX5          | YGR077C                 | PEX8          |
| YGL178W                                          | MPT5          | YPR119W                 | CLB2          |
| YOR195W                                          | SLK19         | YJL127C                 | SPT10         |
| YCR086W                                          | CSM1          | YLR032W                 | RAD5          |

| Predictions at threshold level 0.80 continued... |               |                         |               |
|--------------------------------------------------|---------------|-------------------------|---------------|
| Gene1 of predicted pair                          |               | Gene2 of predicted pair |               |
| Systematic Name                                  | Standard Name | Systematic Name         | Standard Name |
| YBR131W                                          | CCZ1          | YDL077C                 | VAM6          |
| YDL006W                                          | PTC1          | YNL051W                 | COG5          |
| YNL032W                                          | SIW14         | YGL124C                 | MON1          |
| YNL044W                                          | YIP3          | YCL001W                 | RER1          |
| YPR051W                                          | MAK3          | YGR020C                 | VMA7          |
| YKL139W                                          | CTK1          | YLR315W                 | NKP2          |
| YHR012W                                          | VPS29         | YDR310C                 | SUM1          |
| YNL068C                                          | FKH2          | YJL136C                 | RPS21B        |
| YPL253C                                          | VIK1          | YPR120C                 | CLB5          |
| YMR054W                                          | STV1          | YAR014C                 | BUD14         |
| YMR095C                                          | SNO1          | YLR320W                 | MMS22         |
| YLR452C                                          | SST2          | YNL041C                 | COG6          |
| YBR036C                                          | CSG2          | YER122C                 | GLO3          |
| YDL083C                                          | RPS16B        | YPL137C                 | GIP3          |
| YGL115W                                          | SNF4          | YDR422C                 | SIP1          |
| YKL116C                                          | PRR1          | YHR039C-A               | VMA10         |
| YDR363W-A                                        | SEM1          | YIL008W                 | URM1          |
| YDR137W                                          | RGP1          | YJR033C                 | RAV1          |
| YDR289C                                          | RTT103        | YJR090C                 | GRR1          |
| YOR080W                                          | DIA2          | YBR082C                 | UBC4          |
| YIL148W                                          | RPL40A        | YOR358W                 | HAP5          |
| YMR095C                                          | SNO1          | YBR019C                 | GAL10         |
| YGR184C                                          | UBR1          | YPR036W                 | VMA13         |
| YLR410W                                          | VIP1          | YGL163C                 | RAD54         |
| YBR215W                                          | HPC2          | YGR252W                 | GCN5          |
| YHL031C                                          | GOS1          | YAL002W                 | VPS8          |
| YDR385W                                          | EFT2          | YDR137W                 | RGP1          |
| YEL005C                                          | VAB2          | YEL013W                 | VAC8          |
| YLR119W                                          | SRN2          | YHR039C-A               | VMA10         |

| Predictions at threshold level 0.80 continued... |               |                         |               |
|--------------------------------------------------|---------------|-------------------------|---------------|
| Gene1 of predicted pair                          |               | Gene2 of predicted pair |               |
| Systematic Name                                  | Standard Name | Systematic Name         | Standard Name |
| YHR178W                                          | STB5          | YHR114W                 | BZZ1          |
| YLR233C                                          | EST1          | YAL002W                 | VPS8          |
| YHR098C                                          | SFB3          | YOL012C                 | HTZ1          |
| YDR155C                                          | CPR1          | YGL003C                 | CDH1          |
| YDL226C                                          | GCS1          | YDL137W                 | ARF2          |
| YLR079W                                          | SIC1          | YBL079W                 | NUP170        |
| YDL184C                                          | RPL41A        | YJL095W                 | BCK1          |
| YBR200W                                          | BEM1          | YMR038C                 | CCS1          |
| YNL307C                                          | MCK1          | YGL003C                 | CDH1          |
| YDL116W                                          | NUP84         | YHR073W                 | OSH3          |
| YPL024W                                          | RMI1          | YLR234W                 | TOP3          |
| YMR198W                                          | CIK1          | YJL095W                 | BCK1          |
| YCL037C                                          | SRO9          | YEL060C                 | PRB1          |
| YGR133W                                          | PEX4          | YKR014C                 | YPT52         |
| YLR148W                                          | PEP3          | YHR161C                 | YAP1801       |
| YDR477W                                          | SNF1          | YLR386W                 | VAC14         |
| YCR077C                                          | PAT1          | YGL148W                 | ARO2          |
| YBL021C                                          | HAP3          | YDR254W                 | CHL4          |
| YOR132W                                          | VPS17         | YHR111W                 | UBA4          |
| YPL037C                                          | EGD1          | YER139C                 | YER139C       |
| YPR028W                                          | YOP1          | YGL198W                 | YIP4          |
| YPR051W                                          | MAK3          | YGR188C                 | BUB1          |
| YCR024C-A                                        | PMP1          | YGL016W                 | KAP122        |
| YOR195W                                          | SLK19         | YDR264C                 | AKR1          |
| YKR072C                                          | SIS2          | YMR055C                 | BUB2          |
| YPR051W                                          | MAK3          | YCL037C                 | SRO9          |
| YHR152W                                          | SPO12         | YHR200W                 | RPN10         |
| YFR030W                                          | MET10         | YGR262C                 | BUD32         |
| YBR200W                                          | BEM1          | YBR215W                 | HPC2          |



| Predictions at threshold level 0.80 continued... |               |                         |               |
|--------------------------------------------------|---------------|-------------------------|---------------|
| Gene1 of predicted pair                          |               | Gene2 of predicted pair |               |
| Systematic Name                                  | Standard Name | Systematic Name         | Standard Name |
| YIL053W                                          | RHR2          | YLR370C                 | ARC18         |
| YJR040W                                          | GEF1          | YNL238W                 | KEX2          |
| YDR261C                                          | EXG2          | YJR084W                 | CSN12         |
| YOL126C                                          | MDH2          | YPL256C                 | CLN2          |
| YMR026C                                          | PEX12         | YDL223C                 | HBT1          |
| YFL023W                                          | BUD27         | YNL076W                 | MKS1          |
| YOR270C                                          | VPH1          | YDL223C                 | HBT1          |
| YHR156C                                          | LIN1          | YJL183W                 | MNN11         |
| YKL032C                                          | IXR1          | YLR425W                 | TUS1          |
| YNL238W                                          | KEX2          | YNL127W                 | FAR11         |
| YDR378C                                          | LSM6          | YLR410W                 | VIP1          |
| YJR032W                                          | CPR7          | YCR053W                 | THR4          |
| YOR106W                                          | VAM3          | YPL234C                 | TFP3          |
| YMR198W                                          | CIK1          | YMR038C                 | CCS1          |
| YHR060W                                          | VMA22         | YDR207C                 | UME6          |
| YDL155W                                          | CLB3          | YHR114W                 | BZZ1          |
| YDR318W                                          | MCM21         | YNL116W                 | DMA2          |
| YDL065C                                          | PEX19         | YOL044W                 | PEX15         |
| YPR040W                                          | TIP41         | YLR425W                 | TUS1          |
| YMR109W                                          | MYO5          | YJR090C                 | GRR1          |
| YOR043W                                          | WHI2          | YLR398C                 | SKI2          |
| YER075C                                          | PTP3          | YER089C                 | PTC2          |
| YLR090W                                          | XDJ1          | YPL057C                 | SUR1          |
| YOR327C                                          | SNC2          | YKR030W                 | GMH1          |
| YMR004W                                          | MVP1          | YNL127W                 | FAR11         |
| YMR116C                                          | ASC1          | YDL223C                 | HBT1          |
| YOR033C                                          | EXO1          | YNL076W                 | MKS1          |
| YLR381W                                          | CTF3          | YGR135W                 | PRE9          |
| YMR152W                                          | YIM1          | YDL077C                 | VAM6          |

| Predictions at threshold level 0.80 continued... |               |                         |               |
|--------------------------------------------------|---------------|-------------------------|---------------|
| Gene1 of predicted pair                          |               | Gene2 of predicted pair |               |
| Systematic Name                                  | Standard Name | Systematic Name         | Standard Name |
| YBR200W                                          | BEM1          | YNL229C                 | URE2          |
| YFR031C-A                                        | RPL2A         | YLR370C                 | ARC18         |
| YLR018C                                          | POM34         | YGL215W                 | CLG1          |
| YMR224C                                          | MRE11         | YNL291C                 | MID1          |
| YFR024C-A                                        | LSB3          | YPR119W                 | CLB2          |
| YKR093W                                          | PTR2          | YPR149W                 | NCE102        |
| YLR135W                                          | SLX4          | YBR073W                 | RDH54         |
| YHR039C-A                                        | VMA10         | YPR032W                 | SRO7          |
| YNL199C                                          | GCR2          | YOR014W                 | RTS1          |
| YPR084W                                          | YPR084W       | YNL291C                 | MID1          |
| YJR032W                                          | CPR7          | YNL051W                 | COG5          |
| YDL116W                                          | NUP84         | YKL139W                 | CTK1          |
| YGL163C                                          | RAD54         | YOR014W                 | RTS1          |
| YIL076W                                          | SEC28         | YKR020W                 | VPS51         |
| YLR079W                                          | SIC1          | YLR371W                 | ROM2          |
| YGL212W                                          | VAM7          | YPL037C                 | EGD1          |
| YGR249W                                          | MGA1          | YHR060W                 | VMA22         |
| YFR031C-A                                        | RPL2A         | YNL307C                 | MCK1          |
| YNL054W                                          | VAC7          | YJL124C                 | LSM1          |
| YNR052C                                          | POP2          | YML112W                 | CTK3          |
| YMR080C                                          | NAM7          | YNL106C                 | INP52         |
| YJR052W                                          | RAD7          | YBR114W                 | RAD16         |
| YJL176C                                          | SWI3          | YKL032C                 | IXR1          |
| YDR174W                                          | HMO1          | YFR036W                 | CDC26         |
| YJR135C                                          | MCM22         | YDR318W                 | MCM21         |
| YDL020C                                          | RPN4          | YPL234C                 | TFP3          |
| YCR002C                                          | CDC10         | YDR309C                 | GIC2          |
| YPL042C                                          | SSN3          | YOR308C                 | SNU66         |
| YHR156C                                          | LIN1          | YLR452C                 | SST2          |

| Predictions at threshold level 0.80 continued... |               |                         |               |
|--------------------------------------------------|---------------|-------------------------|---------------|
| Gene1 of predicted pair                          |               | Gene2 of predicted pair |               |
| Systematic Name                                  | Standard Name | Systematic Name         | Standard Name |
| YBR194W                                          | SOY1          | YKL114C                 | APN1          |
| YPL057C                                          | SUR1          | YHR167W                 | THP2          |
| YLR360W                                          | VPS38         | YBL051C                 | PIN4          |
| YML115C                                          | VAN1          | YLR180W                 | SAM1          |
| YDL080C                                          | THI3          | YNL107W                 | YAF9          |
| YNL087W                                          | TCB2          | YKL126W                 | YPK1          |
| YPL137C                                          | GIP3          | YLR180W                 | SAM1          |
| YER116C                                          | SLX8          | YPL253C                 | VIK1          |
| YPL253C                                          | VIK1          | YDR200C                 | VPS64         |
| YHR039C-A                                        | VMA10         | YNL076W                 | MKS1          |
| YML071C                                          | COG8          | YDR207C                 | UME6          |
| YLR192C                                          | HCR1          | YLR093C                 | NYV1          |
| YDR129C                                          | SAC6          | YDL161W                 | ENT1          |
| YOR018W                                          | ROD1          | YLR248W                 | RCK2          |
| YPR084W                                          | YPR084W       | YLR182W                 | SWI6          |
| YOR106W                                          | VAM3          | YKR030W                 | GMH1          |
| YLR313C                                          | SPH1          | YDL013W                 | SLX5          |
| YER110C                                          | KAP123        | YBR107C                 | IML3          |
| YKR099W                                          | BAS1          | YNL041C                 | COG6          |
| YDR443C                                          | SSN2          | YER044C                 | ERG28         |
| YDL013W                                          | SLX5          | YBR082C                 | UBC4          |
| YMR216C                                          | SKY1          | YEL053C                 | MAK10         |
| YPR018W                                          | RLF2          | YOR101W                 | RAS1          |
| YIL076W                                          | SEC28         | YHR167W                 | THP2          |
| YMR070W                                          | MOT3          | YOR035C                 | SHE4          |
| YGL115W                                          | SNF4          | YLR320W                 | MMS22         |
| YDR080W                                          | VPS41         | YER120W                 | SCS2          |
| YAL024C                                          | LTE1          | YDR363W-A               | SEM1          |
| YFL003C                                          | MSH4          | YPR119W                 | CLB2          |

| Predictions at threshold level 0.80 continued... |               |                         |               |
|--------------------------------------------------|---------------|-------------------------|---------------|
| Gene1 of predicted pair                          |               | Gene2 of predicted pair |               |
| Systematic Name                                  | Standard Name | Systematic Name         | Standard Name |
| YBR228W                                          | SLX1          | YMR116C                 | ASC1          |
| YMR054W                                          | STV1          | YNR032W                 | PPG1          |
| YOR106W                                          | VAM3          | YAR014C                 | BUD14         |
| YLR386W                                          | VAC14         | YGL253W                 | HXK2          |
| YKL139W                                          | CTK1          | YPL253C                 | VIK1          |
| YNL291C                                          | MID1          | YNL051W                 | COG5          |
| YLR360W                                          | VPS38         | YBR200W                 | BEM1          |
| YJL172W                                          | CPS1          | YOR290C                 | SNF2          |
| YLR381W                                          | CTF3          | YML028W                 | TSA1          |
| YOL067C                                          | RTG1          | YNL107W                 | YAF9          |
| YGL175C                                          | SAE2          | YOL090W                 | MSH2          |
| YGL087C                                          | MMS2          | YDL013W                 | SLX5          |
| YIL156W                                          | UBP7          | YKL068W                 | NUP100        |
| YML109W                                          | ZDS2          | YDR309C                 | GIC2          |
| YMR004W                                          | MVP1          | YNL238W                 | KEX2          |
| YGR104C                                          | SRB5          | YNR052C                 | POP2          |
| YDR363W-A                                        | SEM1          | YJL183W                 | MNN11         |
| YDR254W                                          | CHL4          | YGL151W                 | NUT1          |
| YEL050C                                          | RML2          | YNL107W                 | YAF9          |
| YGR072W                                          | UPF3          | YFR010W                 | UBP6          |
| YGR071C                                          | YGR071C       | YNL041C                 | COG6          |
| YDR484W                                          | VPS52         | YJL172W                 | CPS1          |
| YGL087C                                          | MMS2          | YDR076W                 | RAD55         |
| YPL178W                                          | CBC2          | YFL047W                 | RGD2          |
| YDR261C                                          | EXG2          | YNL076W                 | MKS1          |
| YGR105W                                          | VMA21         | YAL055W                 | PEX22         |
| YHR081W                                          | LRP1          | YMR214W                 | SCJ1          |
| YKL214C                                          | YRA2          | YBR111W-A               | SUS1          |
| YDR496C                                          | PUF6          | YHR052W                 | CIC1          |

| Predictions at threshold level 0.80 continued... |               |                         |               |
|--------------------------------------------------|---------------|-------------------------|---------------|
| Gene1 of predicted pair                          |               | Gene2 of predicted pair |               |
| Systematic Name                                  | Standard Name | Systematic Name         | Standard Name |
| YBL058W                                          | SHP1          | YKL139W                 | CTK1          |
| YMR142C                                          | RPL13B        | YJR084W                 | CSN12         |
| YLR381W                                          | CTF3          | YOR023C                 | AHC1          |
| YFR031C-A                                        | RPL2A         | YPL105C                 | YPL105C       |
| YGL066W                                          | SGF73         | YBL047C                 | EDE1          |
| YMR231W                                          | PEP5          | YDL226C                 | GCS1          |
| YDR156W                                          | RPA14         | YDR335W                 | MSN5          |
| YPL057C                                          | SUR1          | YGR188C                 | BUB1          |
| YJR032W                                          | CPR7          | YOL081W                 | IRA2          |
| YJL154C                                          | VPS35         | YJR040W                 | GEF1          |
| YPL161C                                          | BEM4          | YER162C                 | RAD4          |
| YIL076W                                          | SEC28         | YNL032W                 | SIW14         |
| YOR290C                                          | SNF2          | YGL003C                 | CDH1          |
| YLR288C                                          | MEC3          | YBR274W                 | CHK1          |
| YFL023W                                          | BUD27         | YHR081W                 | LRP1          |
| YER116C                                          | SLX8          | YLR381W                 | CTF3          |
| YML016C                                          | PPZ1          | YNL147W                 | LSM7          |
| YKR020W                                          | VPS51         | YNL051W                 | COG5          |
| YLR292C                                          | SEC72         | YGL151W                 | NUT1          |
| YLR119W                                          | SRN2          | YPL137C                 | GIP3          |
| YML071C                                          | COG8          | YPR032W                 | SRO7          |
| YBL025W                                          | RRN10         | YLR398C                 | SKI2          |
| YML121W                                          | GTR1          | YKR007W                 | MEH1          |
| YPL253C                                          | VIK1          | YJR063W                 | RPA12         |
| YNL215W                                          | IES2          | YPL018W                 | CTF19         |
| YGR105W                                          | VMA21         | YJR033C                 | RAV1          |
| YGL066W                                          | SGF73         | YOR275C                 | RIM20         |
| YKR061W                                          | KTR2          | YMR055C                 | BUB2          |
| YLR119W                                          | SRN2          | YNR072W                 | HXT17         |

| Predictions at threshold level 0.80 continued... |               |                         |               |
|--------------------------------------------------|---------------|-------------------------|---------------|
| Gene1 of predicted pair                          |               | Gene2 of predicted pair |               |
| Systematic Name                                  | Standard Name | Systematic Name         | Standard Name |
| YJR056C                                          | YJR056C       | YDR137W                 | RGP1          |
| YDR443C                                          | SSN2          | YMR230W                 | RPS10B        |
| YHR060W                                          | VMA22         | YEL053C                 | MAK10         |
| YJR140C                                          | HIR3          | YOR308C                 | SNU66         |
| YDR484W                                          | VPS52         | YOR043W                 | WHI2          |
| YPL115C                                          | BEM3          | YLR447C                 | VMA6          |
| YDR378C                                          | LSM6          | YDR183W                 | PLP1          |
| YMR016C                                          | SOK2          | YBR280C                 | SAF1          |
| YER044C                                          | ERG28         | YJR032W                 | CPR7          |
| YNL288W                                          | CAF40         | YGR108W                 | CLB1          |
| YBR030W                                          | YBR030W       | YJL172W                 | CPS1          |
| YDR245W                                          | MNN10         | YDR207C                 | UME6          |
| YLR093C                                          | NYV1          | YMR214W                 | SCJ1          |
| YKL116C                                          | PRR1          | YOR290C                 | SNF2          |
| YML038C                                          | YMD8          | YNR032W                 | PPG1          |
| YKL213C                                          | DOA1          | YER122C                 | GLO3          |
| YLR337C                                          | VRP1          | YGR108W                 | CLB1          |
| YGL237C                                          | HAP2          | YDR183W                 | PLP1          |
| YDR334W                                          | SWR1          | YGL190C                 | CDC55         |
| YDR293C                                          | SSD1          | YDR310C                 | SUM1          |
| YJL154C                                          | VPS35         | YNL291C                 | MID1          |
| YJL124C                                          | LSM1          | YHR115C                 | DMA1          |
| YJL137C                                          | GLG2          | YIL045W                 | PIG2          |
| YNL236W                                          | SIN4          | YLR370C                 | ARC18         |
| YDR004W                                          | RAD57         | YMR224C                 | MRE11         |
| YDR080W                                          | VPS41         | YOR036W                 | PEP12         |
| YIL008W                                          | URM1          | YAL002W                 | VPS8          |
| YGL115W                                          | SNF4          | YNL051W                 | COG5          |
| YBR127C                                          | VMA2          | YKR020W                 | VPS51         |

| Predictions at threshold level 0.80 continued... |               |                         |               |
|--------------------------------------------------|---------------|-------------------------|---------------|
| Gene1 of predicted pair                          |               | Gene2 of predicted pair |               |
| Systematic Name                                  | Standard Name | Systematic Name         | Standard Name |
| YPL024W                                          | RMI1          | YBR215W                 | HPC2          |
| YDR378C                                          | LSM6          | YJR060W                 | CBF1          |
| YDR363W-A                                        | SEM1          | YOR312C                 | RPL20B        |
| YGL174W                                          | BUD13         | YDR378C                 | LSM6          |
| YDL184C                                          | RPL41A        | YBR171W                 | SEC66         |
| YPL057C                                          | SUR1          | YOR043W                 | WHI2          |
| YGR071C                                          | YGR071C       | YHR077C                 | NMD2          |
| YOR043W                                          | WHI2          | YJL183W                 | MNN11         |
| YNL032W                                          | SIW14         | YMR214W                 | SCJ1          |
| YBR108W                                          | YBR108W       | YPL037C                 | EGD1          |
| YLR119W                                          | SRN2          | YOR066W                 | MSA1          |
| YFR031C-A                                        | RPL2A         | YKR020W                 | VPS51         |
| YJR070C                                          | LIA1          | YEL022W                 | GEA2          |
| YBR274W                                          | CHK1          | YPR120C                 | CLB5          |
| YDR183W                                          | PLP1          | YML112W                 | CTK3          |
| YPR029C                                          | APL4          | YOR327C                 | SNC2          |
| YER001W                                          | MNN1          | YNL079C                 | TPM1          |
| YGL087C                                          | MMS2          | YLR150W                 | STM1          |
| YPR131C                                          | NAT3          | YJR135C                 | MCM22         |
| YGL078C                                          | DBP3          | YLR371W                 | ROM2          |
| YNL069C                                          | RPL16B        | YIL076W                 | SEC28         |
| YMR026C                                          | PEX12         | YBR217W                 | ATG12         |
| YOR132W                                          | VPS17         | YHR060W                 | VMA22         |
| YBL058W                                          | SHP1          | YGL124C                 | MON1          |
| YER001W                                          | MNN1          | YFR036W                 | CDC26         |
| YPL018W                                          | CTF19         | YNL225C                 | CNM67         |
| YJL176C                                          | SWI3          | YDR129C                 | SAC6          |
| YER116C                                          | SLX8          | YMR133W                 | REC114        |
| YOR290C                                          | SNF2          | YLR398C                 | SKI2          |

| Predictions at threshold level 0.80 continued... |               |                         |               |
|--------------------------------------------------|---------------|-------------------------|---------------|
| Gene1 of predicted pair                          |               | Gene2 of predicted pair |               |
| Systematic Name                                  | Standard Name | Systematic Name         | Standard Name |
| YGL033W                                          | HOP2          | YLR180W                 | SAM1          |
| YJL127C                                          | SPT10         | YPL018W                 | CTF19         |
| YMR039C                                          | SUB1          | YDR254W                 | CHL4          |
| YBR171W                                          | SEC66         | YDL006W                 | PTC1          |
| YGR217W                                          | CCH1          | YBR041W                 | FAT1          |
| YBR030W                                          | YBR030W       | YNR072W                 | HXT17         |
| YGL078C                                          | DBP3          | YOR290C                 | SNF2          |
| YPR032W                                          | SRO7          | YAL002W                 | VPS8          |
| YLR386W                                          | VAC14         | YER122C                 | GLO3          |
| YMR039C                                          | SUB1          | YGL163C                 | RAD54         |
| YDR293C                                          | SSD1          | YML001W                 | YPT7          |
| YKL119C                                          | VPH2          | YKL041W                 | VPS24         |
| YCL037C                                          | SRO9          | YER162C                 | RAD4          |
| YIL036W                                          | CST6          | YDR289C                 | RTT103        |
| YDR137W                                          | RGP1          | YHR167W                 | THP2          |
| YDR225W                                          | HTA1          | YPL129W                 | TAF14         |
| YNL201C                                          | PSY2          | YAR014C                 | BUD14         |
| YDR477W                                          | SNF1          | YPR030W                 | CSR2          |
| YLR079W                                          | SIC1          | YDR245W                 | MNN10         |
| YIL034C                                          | CAP2          | YDR183W                 | PLP1          |
| YDR358W                                          | GGA1          | YBL025W                 | RRN10         |
| YGL200C                                          | EMP24         | YOR141C                 | ARP8          |
| YGR135W                                          | PRE9          | YHR115C                 | DMA1          |
| YDL006W                                          | PTC1          | YDR310C                 | SUM1          |
| YER116C                                          | SLX8          | YBR215W                 | HPC2          |
| YIL034C                                          | CAP2          | YMR055C                 | BUB2          |
| YBR215W                                          | HPC2          | YNL236W                 | SIN4          |
| YPL024W                                          | RMI1          | YOR014W                 | RTS1          |
| YJR040W                                          | GEF1          | YPL234C                 | TFP3          |



| Predictions at threshold level 0.80 continued... |               |                         |               |
|--------------------------------------------------|---------------|-------------------------|---------------|
| Gene1 of predicted pair                          |               | Gene2 of predicted pair |               |
| Systematic Name                                  | Standard Name | Systematic Name         | Standard Name |
| YMR109W                                          | MYO5          | YER118C                 | SHO1          |
| YPR051W                                          | MAK3          | YKR030W                 | GMH1          |
| YCL037C                                          | SRO9          | YOR038C                 | HIR2          |
| YER040W                                          | GLN3          | YOL081W                 | IRA2          |
| YER139C                                          | YER139C       | YOL081W                 | IRA2          |
| YDL116W                                          | NUP84         | YER116C                 | SLX8          |
| YJL172W                                          | CPS1          | YDL077C                 | VAM6          |
| YGL078C                                          | DBP3          | YHR060W                 | VMA22         |
| YOL111C                                          | MDY2          | YGL124C                 | MON1          |
| YAL024C                                          | LTE1          | YGL003C                 | CDH1          |
| YAL024C                                          | LTE1          | YDR358W                 | GGA1          |
| YCR039C                                          | MATALPHA2     | YPL240C                 | HSP82         |
| YGR108W                                          | CLB1          | YOR141C                 | ARP8          |
| YGR249W                                          | MGA1          | YBR217W                 | ATG12         |
| YDR318W                                          | MCM21         | YHR115C                 | DMA1          |
| YHR079C                                          | IRE1          | YOL031C                 | SIL1          |
| YJR140C                                          | HIR3          | YML115C                 | VAN1          |
| YIL008W                                          | URM1          | YNL079C                 | TPM1          |
| YPL024W                                          | RMI1          | YKR099W                 | BAS1          |
| YBR258C                                          | SHG1          | YDR155C                 | CPR1          |
| YPR030W                                          | CSR2          | YDL192W                 | ARF1          |
| YDL116W                                          | NUP84         | YPR131C                 | NAT3          |
| YMR080C                                          | NAM7          | YJR140C                 | HIR3          |
| YBL103C                                          | RTG3          | YJL183W                 | MNN11         |
| YOL091W                                          | SPO21         | YNL107W                 | YAF9          |
| YLR234W                                          | TOP3          | YGL148W                 | ARO2          |
| YLR119W                                          | SRN2          | YPL057C                 | SUR1          |
| YDR378C                                          | LSM6          | YPL213W                 | LEA1          |
| YGL033W                                          | HOP2          | YPL037C                 | EGD1          |

| Predictions at threshold level 0.80 continued... |               |                         |               |
|--------------------------------------------------|---------------|-------------------------|---------------|
| Gene1 of predicted pair                          |               | Gene2 of predicted pair |               |
| Systematic Name                                  | Standard Name | Systematic Name         | Standard Name |
| YNL325C                                          | FIG4          | YOR066W                 | MSA1          |
| YER044C                                          | ERG28         | YKR035W-A               | DID2          |
| YDR320C                                          | SWA2          | YPR119W                 | CLB2          |
| YPR017C                                          | DSS4          | YPL120W                 | VPS30         |
| YGR133W                                          | PEX4          | YJR084W                 | CSN12         |
| YIL159W                                          | BNR1          | YGL124C                 | MON1          |
| YNL206C                                          | RTT106        | YMR179W                 | SPT21         |
| YJL124C                                          | LSM1          | YBR036C                 | CSG2          |
| YLR102C                                          | APC9          | YNL229C                 | URE2          |
| YJR140C                                          | HIR3          | YGL174W                 | BUD13         |
| YOR195W                                          | SLK19         | YOR101W                 | RAS1          |
| YLL007C                                          | YLL007C       | YJL190C                 | RPS22A        |
| YGR217W                                          | CCH1          | YMR038C                 | CCS1          |
| YOR270C                                          | VPH1          | YPL161C                 | BEM4          |
| YLR360W                                          | VPS38         | YBR171W                 | SEC66         |
| YBL102W                                          | SFT2          | YHR012W                 | VPS29         |
| YFR031C-A                                        | RPL2A         | YMR214W                 | SCJ1          |
| YLR386W                                          | VAC14         | YPL152W                 | RRD2          |
| YHR200W                                          | RPN10         | YGL124C                 | MON1          |
| YKL139W                                          | CTK1          | YLR093C                 | NYV1          |
| YGR019W                                          | UGA1          | YGR188C                 | BUB1          |
| YMR139W                                          | RIM11         | YDR207C                 | UME6          |
| YDR395W                                          | SXM1          | YER110C                 | KAP123        |
| YMR004W                                          | MVP1          | YLR309C                 | IMH1          |
| YPL001W                                          | HAT1          | YBR195C                 | MSI1          |
| YBL058W                                          | SHP1          | YML115C                 | VAN1          |
| YPL161C                                          | BEM4          | YDR318W                 | MCM21         |
| YML103C                                          | NUP188        | YAR014C                 | BUD14         |
| YML115C                                          | VAN1          | YER044C                 | ERG28         |

| Predictions at threshold level 0.80 continued... |               |                         |               |
|--------------------------------------------------|---------------|-------------------------|---------------|
| Gene1 of predicted pair                          |               | Gene2 of predicted pair |               |
| Systematic Name                                  | Standard Name | Systematic Name         | Standard Name |
| YIL156W                                          | UBP7          | YML103C                 | NUP188        |
| YNL289W                                          | PCL1          | YOR327C                 | SNC2          |
| YMR224C                                          | MRE11         | YNR072W                 | HXT17         |
| YLR360W                                          | VPS38         | YKR030W                 | GMH1          |
| YOR033C                                          | EXO1          | YHR134W                 | WSS1          |
| YOR276W                                          | CAF20         | YOL045W                 | PSK2          |
| YBR030W                                          | YBR030W       | YER040W                 | GLN3          |
| YPR131C                                          | NAT3          | YKL114C                 | APN1          |
| YLR360W                                          | VPS38         | YGL253W                 | HXK2          |
| YHR152W                                          | SPO12         | YPL161C                 | BEM4          |
| YNL307C                                          | MCK1          | YBR019C                 | GAL10         |
| YPL253C                                          | VIK1          | YFR030W                 | MET10         |
| YPR017C                                          | DSS4          | YDR202C                 | RAV2          |
| YDR156W                                          | RPA14         | YML103C                 | NUP188        |
| YKL126W                                          | YPK1          | YBL047C                 | EDE1          |
| YKR072C                                          | SIS2          | YOR038C                 | HIR2          |
| YPL046C                                          | ELC1          | YGL115W                 | SNF4          |
| YHR167W                                          | THP2          | YNL107W                 | YAF9          |
| YKL213C                                          | DOA1          | YHL002W                 | HSE1          |
| YJL176C                                          | SWI3          | YKR014C                 | YPT52         |
| YPR102C                                          | RPL11A        | YGR100W                 | MDR1          |
| YFL023W                                          | BUD27         | YPR030W                 | CSR2          |
| YOL145C                                          | CTR9          | YDR155C                 | CPR1          |
| YKL139W                                          | CTK1          | YOR080W                 | DIA2          |
| YGL054C                                          | ERV14         | YEL051W                 | VMA8          |
| YFR031C-A                                        | RPL2A         | YDR320C                 | SWA2          |
| YMR273C                                          | ZDS1          | YGL016W                 | KAP122        |
| YHR160C                                          | PEX18         | YNL214W                 | PEX17         |
| YNL201C                                          | PSY2          | YLR386W                 | VAC14         |

| Predictions at threshold level 0.80 continued... |               |                         |               |
|--------------------------------------------------|---------------|-------------------------|---------------|
| Gene1 of predicted pair                          |               | Gene2 of predicted pair |               |
| Systematic Name                                  | Standard Name | Systematic Name         | Standard Name |
| YHR156C                                          | LIN1          | YJR084W                 | CSN12         |
| YFL023W                                          | BUD27         | YBR280C                 | SAF1          |
| YDR383C                                          | NKP1          | YJR060W                 | CBF1          |
| YNL076W                                          | MKS1          | YEL060C                 | PRB1          |
| YIR005W                                          | IST3          | YNL107W                 | YAF9          |
| YDL223C                                          | HBT1          | YHR081W                 | LRP1          |
| YMR198W                                          | CIK1          | YPL001W                 | HAT1          |
| YBL008W                                          | HIR1          | YCR077C                 | PAT1          |
| YER179W                                          | DMC1          | YNL106C                 | INP52         |
| YKL116C                                          | PRR1          | YJR084W                 | CSN12         |
| YOR132W                                          | VPS17         | YJR090C                 | GRR1          |
| YLR360W                                          | VPS38         | YDR080W                 | VPS41         |
| YMR039C                                          | SUB1          | YNL236W                 | SIN4          |
| YNL236W                                          | SIN4          | YDR318W                 | MCM21         |
| YEL065W                                          | SIT1          | YLR452C                 | SST2          |
| YDR181C                                          | SAS4          | YMR127C                 | SAS2          |
| YML103C                                          | NUP188        | YGR270W                 | YTA7          |
| YBR217W                                          | ATG12         | YPL195W                 | APL5          |
| YLR119W                                          | SRN2          | YDL077C                 | VAM6          |
| YHR156C                                          | LIN1          | YNL041C                 | COG6          |
| YBL058W                                          | SHP1          | YCR053W                 | THR4          |
| YBR107C                                          | IML3          | YJR005W                 | APL1          |
| YLR337C                                          | VRP1          | YHR013C                 | ARD1          |
| YMR142C                                          | RPL13B        | YKR035W-A               | DID2          |
| YDR108W                                          | GSG1          | YDL192W                 | ARF1          |
| YJL176C                                          | SWI3          | YLR360W                 | VPS38         |
| YHR178W                                          | STB5          | YBR200W                 | BEM1          |
| YPL161C                                          | BEM4          | YGL163C                 | RAD54         |
| YBR057C                                          | MUM2          | YLR381W                 | CTF3          |

| Predictions at threshold level 0.80 continued... |               |                         |               |
|--------------------------------------------------|---------------|-------------------------|---------------|
| Gene1 of predicted pair                          |               | Gene2 of predicted pair |               |
| Systematic Name                                  | Standard Name | Systematic Name         | Standard Name |
| YDL047W                                          | SIT4          | YKL114C                 | APN1          |
| YGL115W                                          | SNF4          | YDL192W                 | ARF1          |
| YPL024W                                          | RMI1          | YKL139W                 | CTK1          |
| YBR171W                                          | SEC66         | YJL183W                 | MNN11         |
| YPL240C                                          | HSP82         | YBR089C-A               | NHP6B         |
| YPR120C                                          | CLB5          | YOR368W                 | RAD17         |
| YLR192C                                          | HCR1          | YOL081W                 | IRA2          |
| YDR383C                                          | NKP1          | YPL253C                 | VIK1          |
| YKL010C                                          | UFD4          | YML115C                 | VAN1          |
| YDR129C                                          | SAC6          | YLR371W                 | ROM2          |
| YMR004W                                          | MVP1          | YJL004C                 | SYS1          |
| YDR477W                                          | SNF1          | YGL003C                 | CDH1          |
| YDL020C                                          | RPN4          | YJR032W                 | CPR7          |
| YPR018W                                          | RLF2          | YLR102C                 | APC9          |
| YGL163C                                          | RAD54         | YOR368W                 | RAD17         |
| YPR084W                                          | YPR084W       | YDR207C                 | UME6          |
| YBL008W                                          | HIR1          | YDL042C                 | SIR2          |
| YLR192C                                          | HCR1          | YMR198W                 | CIK1          |
| YLR083C                                          | EMP70         | YHL020C                 | OPI1          |
| YJR090C                                          | GRR1          | YAL002W                 | VPS8          |
| YCL067C                                          | HMLALPHA2     | YCR039C                 | MATALPHA2     |
| YDR379W                                          | RGA2          | YJL095W                 | BCK1          |
| YDL013W                                          | SLX5          | YDR207C                 | UME6          |
| YPL024W                                          | RMI1          | YJL183W                 | MNN11         |
| YBL058W                                          | SHP1          | YPR030W                 | CSR2          |
| YLR102C                                          | APC9          | YIL008W                 | URM1          |
| YPR084W                                          | YPR084W       | YOR112W                 | CEX1          |
| YKL068W                                          | NUP100        | YDR076W                 | RAD55         |
| YMR199W                                          | CLN1          | YER027C                 | GAL83         |

| Predictions at threshold level 0.80 continued... |               |                         |               |
|--------------------------------------------------|---------------|-------------------------|---------------|
| Gene1 of predicted pair                          |               | Gene2 of predicted pair |               |
| Systematic Name                                  | Standard Name | Systematic Name         | Standard Name |
| YJL006C                                          | CTK2          | YKL041W                 | VPS24         |
| YMR179W                                          | SPT21         | YPL253C                 | VIK1          |
| YNL201C                                          | PSY2          | YLR254C                 | NDL1          |
| YOR080W                                          | DIA2          | YDL002C                 | NHP10         |
| YJL154C                                          | VPS35         | YCR088W                 | ABP1          |
| YIL076W                                          | SEC28         | YMR214W                 | SCJ1          |
| YNL079C                                          | TPM1          | YGL019W                 | CKB1          |
| YDL116W                                          | NUP84         | YPL042C                 | SSN3          |
| YJL183W                                          | MNN11         | YMR230W                 | RPS10B        |
| YLR381W                                          | CTF3          | YDR155C                 | CPR1          |
| YBR173C                                          | UMP1          | YPL022W                 | RAD1          |
| YER116C                                          | SLX8          | YNL087W                 | TCB2          |
| YMR004W                                          | MVP1          | YOL018C                 | TLG2          |
| YOR109W                                          | INP53         | YJR033C                 | RAV1          |
| YKL139W                                          | CTK1          | YLR180W                 | SAM1          |
| YMR202W                                          | ERG2          | YGL115W                 | SNF4          |
| YGL078C                                          | DBP3          | YDL184C                 | RPL41A        |
| YPL046C                                          | ELC1          | YER162C                 | RAD4          |
| YDR254W                                          | CHL4          | YPR119W                 | CLB2          |
| YBL017C                                          | PEP1          | YJR125C                 | ENT3          |
| YDL184C                                          | RPL41A        | YKR099W                 | BAS1          |
| YDR443C                                          | SSN2          | YER162C                 | RAD4          |
| YJR032W                                          | CPR7          | YLR398C                 | SKI2          |
| YMR142C                                          | RPL13B        | YGL115W                 | SNF4          |
| YJL004C                                          | SYS1          | YNL127W                 | FAR11         |
| YLR234W                                          | TOP3          | YBR036C                 | CSG2          |
| YER179W                                          | DMC1          | YBR073W                 | RDH54         |
| YPL024W                                          | RMI1          | YER139C                 | YER139C       |
| YGL025C                                          | PGD1          | YPL161C                 | BEM4          |

| Predictions at threshold level 0.80 continued... |               |                         |               |
|--------------------------------------------------|---------------|-------------------------|---------------|
| Gene1 of predicted pair                          |               | Gene2 of predicted pair |               |
| Systematic Name                                  | Standard Name | Systematic Name         | Standard Name |
| YBR289W                                          | SNF5          | YKL109W                 | HAP4          |
| YKL139W                                          | CTK1          | YHR200W                 | RPN10         |
| YMR153W                                          | NUP53         | YGL003C                 | CDH1          |
| YKL126W                                          | YPK1          | YER122C                 | GLO3          |
| YEL053C                                          | MAK10         | YDR261C                 | EXG2          |
| YOR127W                                          | RGA1          | YGR054W                 | YGR054W       |
| YBR127C                                          | VMA2          | YJL183W                 | MNN11         |
| YLR095C                                          | IOC2          | YKR035W-A               | DID2          |
| YEL053C                                          | MAK10         | YJR032W                 | CPR7          |
| YPL046C                                          | ELC1          | YOR028C                 | CIN5          |
| YEL027W                                          | CUP5          | YKR001C                 | VPS1          |
| YPL037C                                          | EGD1          | YKR035W-A               | DID2          |
| YOR127W                                          | RGA1          | YCL037C                 | SRO9          |
| YOR106W                                          | VAM3          | YGL198W                 | YIP4          |
| YLR315W                                          | NKP2          | YDR440W                 | DOT1          |
| YNL051W                                          | COG5          | YNL107W                 | YAF9          |
| YKL139W                                          | CTK1          | YOR001W                 | RRP6          |
| YGR184C                                          | UBR1          | YCL014W                 | BUD3          |
| YIL159W                                          | BNR1          | YNL058C                 | YNL058C       |
| YJL036W                                          | SNX4          | YOR109W                 | INP53         |
| YOR195W                                          | SLK19         | YPR120C                 | CLB5          |
| YNL289W                                          | PCL1          | YNL116W                 | DMA2          |
| YER144C                                          | UBP5          | YDR207C                 | UME6          |
| YDL155W                                          | CLB3          | YOL067C                 | RTG1          |
| YGR252W                                          | GCN5          | YHR200W                 | RPN10         |
| YOR083W                                          | WHI5          | YJR005W                 | APL1          |
| YBR009C                                          | HHF1          | YOR141C                 | ARP8          |
| YOR001W                                          | RRP6          | YER139C                 | YER139C       |
| YDR320C                                          | SWA2          | YJR031C                 | GEA1          |

| Predictions at threshold level 0.80 continued... |               |                         |               |
|--------------------------------------------------|---------------|-------------------------|---------------|
| Gene1 of predicted pair                          |               | Gene2 of predicted pair |               |
| Systematic Name                                  | Standard Name | Systematic Name         | Standard Name |
| YDR176W                                          | NGG1          | YJL140W                 | RPB4          |
| YLR337C                                          | VRP1          | YOR308C                 | SNU66         |
| YOR035C                                          | SHE4          | YDR207C                 | UME6          |
| YJL176C                                          | SWI3          | YER161C                 | SPT2          |
| YBL008W                                          | HIR1          | YDL002C                 | NHP10         |
| YML016C                                          | PPZ1          | YBR107C                 | IML3          |
| YPL253C                                          | VIK1          | YPL152W                 | RRD2          |
| YLR386W                                          | VAC14         | YER162C                 | RAD4          |
| YFL023W                                          | BUD27         | YOR035C                 | SHE4          |
| YMR116C                                          | ASC1          | YMR205C                 | PFK2          |
| YBR030W                                          | YBR030W       | YKR035W-A               | DID2          |
| YOR083W                                          | WHI5          | YPR120C                 | CLB5          |
| YLR360W                                          | VPS38         | YGL200C                 | EMP24         |
| YDL184C                                          | RPL41A        | YER040W                 | GLN3          |
| YKR020W                                          | VPS51         | YNL107W                 | YAF9          |
| YDL006W                                          | PTC1          | YGR105W                 | VMA21         |
| YLR093C                                          | NYV1          | YOL081W                 | IRA2          |
| YDL020C                                          | RPN4          | YMR224C                 | MRE11         |
| YNL147W                                          | LSM7          | YOL081W                 | IRA2          |
| YDR176W                                          | NGG1          | YLR182W                 | SWI6          |
| YGL200C                                          | EMP24         | YOR035C                 | SHE4          |
| YHR178W                                          | STB5          | YBR274W                 | CHK1          |
| YPL246C                                          | RBD2          | YKL068W                 | NUP100        |
| YOR001W                                          | RRP6          | YKL213C                 | DOA1          |
| YGR104C                                          | SRB5          | YBR089C-A               | NHP6B         |
| YNL218W                                          | MGS1          | YMR284W                 | YKU70         |
| YHR060W                                          | VMA22         | YAL002W                 | VPS8          |
| YPL046C                                          | ELC1          | YER059W                 | PCL6          |
| YOR106W                                          | VAM3          | YOL018C                 | TLG2          |



| Predictions at threshold level 0.80 continued... |               |                         |               |
|--------------------------------------------------|---------------|-------------------------|---------------|
| Gene1 of predicted pair                          |               | Gene2 of predicted pair |               |
| Systematic Name                                  | Standard Name | Systematic Name         | Standard Name |
| YMR273C                                          | ZDS1          | YBR009C                 | HHF1          |
| YDR383C                                          | NKP1          | YNL248C                 | RPA49         |
| YBR200W                                          | BEM1          | YJL187C                 | SWE1          |
| YGR019W                                          | UGA1          | YHR012W                 | VPS29         |
| YOR337W                                          | TEA1          | YDR477W                 | SNF1          |
| YGL212W                                          | VAM7          | YER040W                 | GLN3          |
| YKR035W-A                                        | DID2          | YPL195W                 | APL5          |
| YPL024W                                          | RMI1          | YBR278W                 | DPB3          |
| YDL155W                                          | CLB3          | YGL124C                 | MON1          |
| YNL325C                                          | FIG4          | YGL212W                 | VAM7          |
| YEL065W                                          | SIT1          | YFR031C-A               | RPL2A         |
| YDR137W                                          | RGP1          | YGL124C                 | MON1          |
| YER116C                                          | SLX8          | YDR076W                 | RAD55         |
| YBR127C                                          | VMA2          | YKL080W                 | VMA5          |
| YDL116W                                          | NUP84         | YML016C                 | PPZ1          |
| YLR083C                                          | EMP70         | YDR202C                 | RAV2          |
| YGL054C                                          | ERV14         | YJR060W                 | CBF1          |
| YDR363W-A                                        | SEM1          | YDL226C                 | GCS1          |
| YLR095C                                          | IOC2          | YOR337W                 | TEA1          |
| YNL325C                                          | FIG4          | YDL184C                 | RPL41A        |
| YIL053W                                          | RHR2          | YOR043W                 | WHI2          |
| YPL152W                                          | RRD2          | YPR046W                 | MCM16         |
| YOR080W                                          | DIA2          | YLR350W                 | ORM2          |
| YMR284W                                          | YKU70         | YPL022W                 | RAD1          |
| YBR215W                                          | HPC2          | YBR195C                 | MSI1          |
| YDL116W                                          | NUP84         | YLR135W                 | SLX4          |
| YLR386W                                          | VAC14         | YDR289C                 | RTT103        |
| YNL087W                                          | TCB2          | YPR046W                 | MCM16         |
| YGL078C                                          | DBP3          | YOR270C                 | VPH1          |

| Predictions at threshold level 0.80 continued... |               |                         |               |
|--------------------------------------------------|---------------|-------------------------|---------------|
| Gene1 of predicted pair                          |               | Gene2 of predicted pair |               |
| Systematic Name                                  | Standard Name | Systematic Name         | Standard Name |
| YER115C                                          | SPR6          | YNL199C                 | GCR2          |
| YER144C                                          | UBP5          | YFR036W                 | CDC26         |
| YLR018C                                          | POM34         | YLR079W                 | SIC1          |
| YKR001C                                          | VPS1          | YPL161C                 | BEM4          |
| YKL032C                                          | IXR1          | YOL081W                 | IRA2          |
| YGR104C                                          | SRB5          | YLR399C                 | BDF1          |
| YLR386W                                          | VAC14         | YJL172W                 | CPS1          |
| YPL195W                                          | APL5          | YNR032W                 | PPG1          |
| YJR059W                                          | PTK2          | YMR153W                 | NUP53         |
| YGL175C                                          | SAE2          | YJR090C                 | GRR1          |
| YMR004W                                          | MVP1          | YER120W                 | SCS2          |
| YPL022W                                          | RAD1          | YDR363W-A               | SEM1          |
| YIL034C                                          | CAP2          | YDR318W                 | MCM21         |
| YJR063W                                          | RPA12         | YBR289W                 | SNF5          |
| YPL042C                                          | SSN3          | YFR010W                 | UBP6          |
| YEL044W                                          | IES6          | YDL223C                 | HBT1          |
| YIL008W                                          | URM1          | YOL067C                 | RTG1          |
| YML115C                                          | VAN1          | YLR032W                 | RAD5          |
| YBL103C                                          | RTG3          | YOL108C                 | INO4          |
| YHR012W                                          | VPS29         | YKR030W                 | GMH1          |
| YML095C                                          | RAD10         | YPR119W                 | CLB2          |
| YGR104C                                          | SRB5          | YPL042C                 | SSN3          |
| YDR202C                                          | RAV2          | YPL195W                 | APL5          |
| YPL022W                                          | RAD1          | YJL058C                 | BIT61         |
| YLR006C                                          | SSK1          | YNR031C                 | SSK2          |
| YLR447C                                          | VMA6          | YER072W                 | VTC1          |
| YFR010W                                          | UBP6          | YNL087W                 | TCB2          |
| YLR441C                                          | RPS1A         | YDL083C                 | RPS16B        |
| YER096W                                          | SHC1          | YPL256C                 | CLN2          |

| Predictions at threshold level 0.80 continued... |               |                         |               |
|--------------------------------------------------|---------------|-------------------------|---------------|
| Gene1 of predicted pair                          |               | Gene2 of predicted pair |               |
| Systematic Name                                  | Standard Name | Systematic Name         | Standard Name |
| YDL184C                                          | RPL41A        | YNL041C                 | COG6          |
| YKL116C                                          | PRR1          | YGL115W                 | SNF4          |
| YOR066W                                          | MSA1          | YMR230W                 | RPS10B        |
| YHR115C                                          | DMA1          | YGL252C                 | RTG2          |
| YJR056C                                          | YJR056C       | YMR133W                 | REC114        |
| YER114C                                          | BOI2          | YBL085W                 | BOI1          |
| YPR018W                                          | RLF2          | YLR032W                 | RAD5          |
| YLR360W                                          | VPS38         | YHR060W                 | VMA22         |
| YJL154C                                          | VPS35         | YDR153C                 | ENT5          |
| YBR195C                                          | MSI1          | YNL183C                 | NPR1          |
| YNL291C                                          | MID1          | YDR153C                 | ENT5          |
| YEL065W                                          | SIT1          | YBR036C                 | CSG2          |
| YOR145C                                          | PNO1          | YHR081W                 | LRP1          |
| YIL076W                                          | SEC28         | YNL087W                 | TCB2          |
| YER161C                                          | SPT2          | YMR038C                 | CCS1          |
| YIL034C                                          | CAP2          | YKL213C                 | DOA1          |
| YLR119W                                          | SRN2          | YNR006W                 | VPS27         |
| YJL060W                                          | BNA3          | YGL003C                 | CDH1          |
| YMR224C                                          | MRE11         | YGL003C                 | CDH1          |
| YLR386W                                          | VAC14         | YJR135C                 | MCM22         |
| YPR051W                                          | MAK3          | YMR054W                 | STV1          |
| YHR200W                                          | RPN10         | YFL007W                 | BLM10         |
| YJL187C                                          | SWE1          | YOL090W                 | MSH2          |
| YLR288C                                          | MEC3          | YOR039W                 | CKB2          |
| YOR001W                                          | RRP6          | YLR350W                 | ORM2          |
| YKL032C                                          | IXR1          | YBL072C                 | RPS8A         |
| YAL024C                                          | LTE1          | YNL107W                 | YAF9          |
| YNL307C                                          | MCK1          | YER044C                 | ERG28         |
| YDR202C                                          | RAV2          | YKR001C                 | VPS1          |

| Predictions at threshold level 0.80 continued... |               |                         |               |
|--------------------------------------------------|---------------|-------------------------|---------------|
| Gene1 of predicted pair                          |               | Gene2 of predicted pair |               |
| Systematic Name                                  | Standard Name | Systematic Name         | Standard Name |
| YML071C                                          | COG8          | YER040W                 | GLN3          |
| YKL010C                                          | UFD4          | YGL200C                 | EMP24         |
| YNL087W                                          | TCB2          | YNL076W                 | MKS1          |
| YGL163C                                          | RAD54         | YIL103W                 | DPH1          |
| YDL185W                                          | TFP1          | YKL080W                 | VMA5          |
| YLR150W                                          | STM1          | YPR120C                 | CLB5          |
| YGR135W                                          | PRE9          | YGL031C                 | RPL24A        |
| YER116C                                          | SLX8          | YMR231W                 | PEP5          |
| YDR137W                                          | RGP1          | YPR030W                 | CSR2          |
| YDR225W                                          | HTA1          | YKL101W                 | HSL1          |
| YLR148W                                          | PEP3          | YOR036W                 | PEP12         |
| YNL236W                                          | SIN4          | YOR141C                 | ARP8          |
| YBL008W                                          | HIR1          | YPR046W                 | MCM16         |
| YER162C                                          | RAD4          | YMR230W                 | RPS10B        |
| YJR106W                                          | ECM27         | YOR071C                 | THI71         |
| YPL115C                                          | BEM3          | YPL256C                 | CLN2          |
| YDR146C                                          | SWI5          | YOR038C                 | HIR2          |
| YKL048C                                          | ELM1          | YGL252C                 | RTG2          |
| YPL057C                                          | SUR1          | YDL083C                 | RPS16B        |
| YMR172W                                          | HOT1          | YOR132W                 | VPS17         |
| YPR101W                                          | SNT309        | YBR114W                 | RAD16         |
| YPL115C                                          | BEM3          | YGL253W                 | HXK2          |
| YIL159W                                          | BNR1          | YFR036W                 | CDC26         |
| YPL045W                                          | VPS16         | YAL002W                 | VPS8          |
| YDR137W                                          | RGP1          | YDL223C                 | HBT1          |
| YLR288C                                          | MEC3          | YDL002C                 | NHP10         |
| YGL025C                                          | PGD1          | YHR200W                 | RPN10         |
| YDL155W                                          | CLB3          | YDR155C                 | CPR1          |
| YBR041W                                          | FAT1          | YJL183W                 | MNN11         |

| Predictions at threshold level 0.80 continued... |               |                         |               |
|--------------------------------------------------|---------------|-------------------------|---------------|
| Gene1 of predicted pair                          |               | Gene2 of predicted pair |               |
| Systematic Name                                  | Standard Name | Systematic Name         | Standard Name |
| YDR507C                                          | GIN4          | YBL087C                 | RPL23A        |
| YNL243W                                          | SLA2          | YIL002C                 | INP51         |
| YER144C                                          | UBP5          | YOL111C                 | MDY2          |
| YBR194W                                          | SOY1          | YEL013W                 | VAC8          |
| YKL010C                                          | UFD4          | YLR425W                 | TUS1          |
| YDR443C                                          | SSN2          | YOR014W                 | RTS1          |
| YML016C                                          | PPZ1          | YHR108W                 | GGA2          |
| YLR119W                                          | SRN2          | YKR035W-A               | DID2          |
| YBR200W                                          | BEM1          | YOR212W                 | STE4          |
| YNL020C                                          | ARK1          | YCR088W                 | ABP1          |
| YJL190C                                          | RPS22A        | YAL002W                 | VPS8          |
| YML038C                                          | YMD8          | YEL053C                 | MAK10         |
| YLR386W                                          | VAC14         | YDR264C                 | AKR1          |
| YMR142C                                          | RPL13B        | YDL192W                 | ARF1          |
| YPL115C                                          | BEM3          | YJR135C                 | MCM22         |
| YFR031C-A                                        | RPL2A         | YHL031C                 | GOS1          |
| YOR112W                                          | CEX1          | YDL006W                 | PTC1          |
| YPL253C                                          | VIK1          | YLR182W                 | SWI6          |
| YLR386W                                          | VAC14         | YOR043W                 | WHI2          |
| YKR061W                                          | KTR2          | YDR289C                 | RTT103        |
| YNL068C                                          | FKH2          | YHR115C                 | DMA1          |
| YGL078C                                          | DBP3          | YOL111C                 | MDY2          |
| YDR469W                                          | SDC1          | YNL107W                 | YAF9          |
| YBR217W                                          | ATG12         | YBR036C                 | CSG2          |
| YPL234C                                          | TFP3          | YNL051W                 | COG5          |
| YPL246C                                          | RBD2          | YML057W                 | CMP2          |
| YDR261C                                          | EXG2          | YER122C                 | GLO3          |
| YDR108W                                          | GSG1          | YMR216C                 | SKY1          |
| YDL223C                                          | HBT1          | YOR312C                 | RPL20B        |

| Predictions at threshold level 0.80 continued... |               |                         |               |
|--------------------------------------------------|---------------|-------------------------|---------------|
| Gene1 of predicted pair                          |               | Gene2 of predicted pair |               |
| Systematic Name                                  | Standard Name | Systematic Name         | Standard Name |
| YJL053W                                          | PEP8          | YHR060W                 | VMA22         |
| YKL032C                                          | IXR1          | YHR111W                 | UBA4          |
| YGR217W                                          | CCH1          | YBR131W                 | CCZ1          |
| YHR134W                                          | WSS1          | YLR386W                 | VAC14         |
| YPL057C                                          | SUR1          | YDR310C                 | SUM1          |
| YDL184C                                          | RPL41A        | YLR441C                 | RPS1A         |
| YDL077C                                          | VAM6          | YAL002W                 | VPS8          |
| YPL256C                                          | CLN2          | YJL187C                 | SWE1          |
| YJL172W                                          | CPS1          | YEL060C                 | PRB1          |
| YNL041C                                          | COG6          | YHR081W                 | LRP1          |
| YBR171W                                          | SEC66         | YOR358W                 | HAP5          |
| YBR112C                                          | CYC8          | YNL167C                 | SKO1          |
| YLL007C                                          | YLL007C       | YGR108W                 | CLB1          |
| YNL069C                                          | RPL16B        | YJL004C                 | SYS1          |
| YOL090W                                          | MSH2          | YOR368W                 | RAD17         |
| YLR079W                                          | SIC1          | YGL252C                 | RTG2          |
| YLR337C                                          | VRP1          | YPL234C                 | TFP3          |
| YFR036W                                          | CDC26         | YBL025W                 | RRN10         |
| YMR116C                                          | ASC1          | YOL030W                 | GAS5          |
| YKR061W                                          | KTR2          | YLR254C                 | NDL1          |
| YJL129C                                          | TRK1          | YGR262C                 | BUD32         |
| YFR031C-A                                        | RPL2A         | YDL184C                 | RPL41A        |
| YKR001C                                          | VPS1          | YOL018C                 | TLG2          |
| YJR135C                                          | MCM22         | YDR183W                 | PLP1          |
| YJR063W                                          | RPA12         | YJR135C                 | MCM22         |
| YBR217W                                          | ATG12         | YDR207C                 | UME6          |
| YIL034C                                          | CAP2          | YDL020C                 | RPN4          |
| YHR200W                                          | RPN10         | YIL008W                 | URM1          |
| YMR224C                                          | MRE11         | YOR368W                 | RAD17         |

| Predictions at threshold level 0.80 continued... |               |                         |               |
|--------------------------------------------------|---------------|-------------------------|---------------|
| Gene1 of predicted pair                          |               | Gene2 of predicted pair |               |
| Systematic Name                                  | Standard Name | Systematic Name         | Standard Name |
| YKR001C                                          | VPS1          | YKR020W                 | VPS51         |
| YPR017C                                          | DSS4          | YER120W                 | SCS2          |
| YGL078C                                          | DBP3          | YOR066W                 | MSA1          |
| YJL124C                                          | LSM1          | YKL048C                 | ELM1          |
| YHR156C                                          | LIN1          | YML115C                 | VAN1          |
| YKL048C                                          | ELM1          | YER162C                 | RAD4          |
| YNR072W                                          | HXT17         | YPL195W                 | APL5          |
| YDR439W                                          | LRS4          | YKL048C                 | ELM1          |
| YFR010W                                          | UBP6          | YMR153W                 | NUP53         |
| YHR156C                                          | LIN1          | YOR035C                 | SHE4          |
| YMR224C                                          | MRE11         | YER044C                 | ERG28         |
| YOR106W                                          | VAM3          | YDR207C                 | UME6          |
| YHR200W                                          | RPN10         | YMR311C                 | GLC8          |
| YKL032C                                          | IXR1          | YKR001C                 | VPS1          |
| YDL059C                                          | RAD59         | YHR010W                 | RPL27A        |
| YMR055C                                          | BUB2          | YJR060W                 | CBF1          |
| YOR127W                                          | RGA1          | YPL256C                 | CLN2          |
| YLR386W                                          | VAC14         | YNL079C                 | TPM1          |
| YER116C                                          | SLX8          | YOR043W                 | WHI2          |
| YML103C                                          | NUP188        | YML112W                 | CTK3          |
| YDR076W                                          | RAD55         | YML028W                 | TSA1          |
| YOR195W                                          | SLK19         | YGL163C                 | RAD54         |
| YDR383C                                          | NKP1          | YKL048C                 | ELM1          |
| YLR371W                                          | ROM2          | YER040W                 | GLN3          |
| YOR106W                                          | VAM3          | YGL054C                 | ERV14         |
| YKR057W                                          | RPS21A        | YOR275C                 | RIM20         |
| YPR084W                                          | YPR084W       | YLR309C                 | IMH1          |
| YGL078C                                          | DBP3          | YML115C                 | VAN1          |
| YDR507C                                          | GIN4          | YDR379W                 | RGA2          |

| Predictions at threshold level 0.80 continued... |               |                         |               |
|--------------------------------------------------|---------------|-------------------------|---------------|
| Gene1 of predicted pair                          |               | Gene2 of predicted pair |               |
| Systematic Name                                  | Standard Name | Systematic Name         | Standard Name |
| YGL054C                                          | ERV14         | YLR309C                 | IMH1          |
| YMR179W                                          | SPT21         | YJL124C                 | LSM1          |
| YLR018C                                          | POM34         | YER116C                 | SLX8          |
| YPR084W                                          | YPR084W       | YFL013C                 | IES1          |
| YML016C                                          | PPZ1          | YPL018W                 | CTF19         |
| YGR159C                                          | NSR1          | YPL161C                 | BEM4          |
| YDR477W                                          | SNF1          | YJL095W                 | BCK1          |
| YER016W                                          | BIM1          | YGL094C                 | PAN2          |
| YKR101W                                          | SIR1          | YNL031C                 | HHT2          |
| YIL053W                                          | RHR2          | YDR137W                 | RGP1          |
| YCR020C-A                                        | MAK31         | YOR112W                 | CEX1          |
| YFL023W                                          | BUD27         | YER122C                 | GLO3          |
| YNR052C                                          | POP2          | YDR289C                 | RTT103        |
| YOR140W                                          | SFL1          | YEL036C                 | ANP1          |
| YNL079C                                          | TPM1          | YOL110W                 | SHR5          |
| YER116C                                          | SLX8          | YCR086W                 | CSM1          |
| YDR310C                                          | SUM1          | YPR032W                 | SRO7          |
| YPR018W                                          | RLF2          | YFR010W                 | UBP6          |
| YOR001W                                          | RRP6          | YDL047W                 | SIT4          |
| YML115C                                          | VAN1          | YNL032W                 | SIW14         |
| YOR080W                                          | DIA2          | YMR038C                 | CCS1          |
| YDL020C                                          | RPN4          | YBR108W                 | YBR108W       |
| YNR052C                                          | POP2          | YJL141C                 | YAK1          |
| YOR127W                                          | RGA1          | YJR060W                 | CBF1          |
| YBR107C                                          | IML3          | YHR013C                 | ARD1          |
| YDL006W                                          | PTC1          | YHR158C                 | KEL1          |
| YBR173C                                          | UMP1          | YLR452C                 | SST2          |
| YDL160C                                          | DHH1          | YJL124C                 | LSM1          |
| YNL032W                                          | SIW14         | YHR081W                 | LRP1          |



| Predictions at threshold level 0.80 continued... |               |                         |               |
|--------------------------------------------------|---------------|-------------------------|---------------|
| Gene1 of predicted pair                          |               | Gene2 of predicted pair |               |
| Systematic Name                                  | Standard Name | Systematic Name         | Standard Name |
| YLR386W                                          | VAC14         | YNL041C                 | COG6          |
| YDR383C                                          | NKP1          | YOR195W                 | SLK19         |
| YBL079W                                          | NUP170        | YJR090C                 | GRR1          |
| YDR156W                                          | RPA14         | YGL252C                 | RTG2          |
| YML062C                                          | MFT1          | YOL145C                 | CTR9          |
| YPL234C                                          | TFP3          | YML001W                 | YPT7          |
| YDR439W                                          | LRS4          | YAR014C                 | BUD14         |
| YHR203C                                          | RPS4B         | YER102W                 | RPS8B         |
| YBR289W                                          | SNF5          | YNL236W                 | SIN4          |
| YLR234W                                          | TOP3          | YJR140C                 | HIR3          |
| YDR477W                                          | SNF1          | YCR084C                 | TUP1          |
| YER144C                                          | UBP5          | YER044C                 | ERG28         |
| YPR032W                                          | SRO7          | YDR207C                 | UME6          |
| YGR217W                                          | CCH1          | YJL117W                 | PHO86         |
| YBR173C                                          | UMP1          | YLR320W                 | MMS22         |
| YLR288C                                          | MEC3          | YJR140C                 | HIR3          |
| YKL116C                                          | PRR1          | YBR108W                 | YBR108W       |
| YLR381W                                          | CTF3          | YBL021C                 | HAP3          |
| YBR108W                                          | YBR108W       | YOR284W                 | HUA2          |
| YLR360W                                          | VPS38         | YGL095C                 | VPS45         |
| YDL184C                                          | RPL41A        | YEL060C                 | PRB1          |
| YER144C                                          | UBP5          | YDR310C                 | SUM1          |
| YDR192C                                          | NUP42         | YML103C                 | NUP188        |
| YDR108W                                          | GSG1          | YJR040W                 | GEF1          |
| YGL003C                                          | CDH1          | YLR180W                 | SAM1          |
| YHR012W                                          | VPS29         | YDR207C                 | UME6          |
| YLR148W                                          | PEP3          | YKR001C                 | VPS1          |
| YEL051W                                          | VMA8          | YNL127W                 | FAR11         |
| YMR224C                                          | MRE11         | YBR173C                 | UMP1          |

| Predictions at threshold level 0.80 continued... |               |                         |               |
|--------------------------------------------------|---------------|-------------------------|---------------|
| Gene1 of predicted pair                          |               | Gene2 of predicted pair |               |
| Systematic Name                                  | Standard Name | Systematic Name         | Standard Name |
| YER122C                                          | GLO3          | YLR180W                 | SAM1          |
| YDL223C                                          | HBT1          | YJL183W                 | MNN11         |
| YDR456W                                          | NHX1          | YER049W                 | TPA1          |
| YKL025C                                          | PAN3          | YLL007C                 | YLL007C       |
| YDL160C                                          | DHH1          | YKR059W                 | TIF1          |
| YGL115W                                          | SNF4          | YJR084W                 | CSN12         |
| YGL147C                                          | RPL9A         | YMR133W                 | REC114        |
| YGR188C                                          | BUB1          | YDR310C                 | SUM1          |
| YER162C                                          | RAD4          | YNL127W                 | FAR11         |
| YBR108W                                          | YBR108W       | YML001W                 | YPT7          |
| YHR039C-A                                        | VMA10         | YPL195W                 | APL5          |
| YHR013C                                          | ARD1          | YAL002W                 | VPS8          |
| YBL051C                                          | PIN4          | YML095C                 | RAD10         |
| YER116C                                          | SLX8          | YPL195W                 | APL5          |
| YBR131W                                          | CCZ1          | YOR275C                 | RIM20         |
| YJL095W                                          | BCK1          | YEL060C                 | PRB1          |
| YGR104C                                          | SRB5          | YFR034C                 | PHO4          |
| YOR039W                                          | CKB2          | YBR200W                 | BEM1          |
| YOR270C                                          | VPH1          | YJR084W                 | CSN12         |
| YDR490C                                          | PKH1          | YKL126W                 | YPK1          |
| YPR017C                                          | DSS4          | YOR132W                 | VPS17         |
| YIL076W                                          | SEC28         | YCR077C                 | PAT1          |
| YOL054W                                          | PSH1          | YLR182W                 | SWI6          |
| YDR225W                                          | HTA1          | YBR107C                 | IML3          |
| YMR052W                                          | FAR3          | YPR119W                 | CLB2          |
| YNL068C                                          | FKH2          | YDR264C                 | AKR1          |
| YHR081W                                          | LRP1          | YBR036C                 | CSG2          |
| YEL065W                                          | SIT1          | YLR386W                 | VAC14         |
| YGL163C                                          | RAD54         | YDR183W                 | PLP1          |

| Predictions at threshold level 0.80 continued... |               |                         |               |
|--------------------------------------------------|---------------|-------------------------|---------------|
| Gene1 of predicted pair                          |               | Gene2 of predicted pair |               |
| Systematic Name                                  | Standard Name | Systematic Name         | Standard Name |
| YDR129C                                          | SAC6          | YLR425W                 | TUS1          |
| YNL127W                                          | FAR11         | YNL107W                 | YAF9          |
| YBR127C                                          | VMA2          | YDR323C                 | PEP7          |
| YLR148W                                          | PEP3          | YGR241C                 | YAP1802       |
| YDR439W                                          | LRS4          | YLR315W                 | NKP2          |
| YOR195W                                          | SLK19         | YDL013W                 | SLX5          |
| YGL025C                                          | PGD1          | YJL183W                 | MNN11         |
| YNL068C                                          | FKH2          | YOR127W                 | RGA1          |
| YMR133W                                          | REC114        | YOL081W                 | IRA2          |
| YDR225W                                          | HTA1          | YDR448W                 | ADA2          |
| YGR019W                                          | UGA1          | YEL056W                 | HAT2          |
| YGR270W                                          | YTA7          | YDL155W                 | CLB3          |
| YGR249W                                          | MGA1          | YPR036W                 | VMA13         |
| YKL010C                                          | UFD4          | YKL006W                 | RPL14A        |
| YPL161C                                          | BEM4          | YML071C                 | COG8          |
| YDR156W                                          | RPA14         | YOR195W                 | SLK19         |
| YBR108W                                          | YBR108W       | YPL018W                 | CTF19         |
| YPR084W                                          | YPR084W       | YDR310C                 | SUM1          |
| YGL147C                                          | RPL9A         | YOL111C                 | MDY2          |
| YER122C                                          | GLO3          | YMR214W                 | SCJ1          |
| YLR170C                                          | APS1          | YJR058C                 | APS2          |
| YIL159W                                          | BNR1          | YMR230W                 | RPS10B        |
| YNL215W                                          | IES2          | YPL057C                 | SUR1          |
| YPL152W                                          | RRD2          | YHR115C                 | DMA1          |
| YOR337W                                          | TEA1          | YMR133W                 | REC114        |
| YDL083C                                          | RPS16B        | YDR310C                 | SUM1          |
| YLR386W                                          | VAC14         | YBR171W                 | SEC66         |
| YIL148W                                          | RPL40A        | YPL256C                 | CLN2          |
| YPR051W                                          | MAK3          | YOL067C                 | RTG1          |

| Predictions at threshold level 0.80 continued... |               |                         |               |
|--------------------------------------------------|---------------|-------------------------|---------------|
| Gene1 of predicted pair                          |               | Gene2 of predicted pair |               |
| Systematic Name                                  | Standard Name | Systematic Name         | Standard Name |
| YLR360W                                          | VPS38         | YIL076W                 | SEC28         |
| YMR026C                                          | PEX12         | YJL095W                 | BCK1          |
| YMR224C                                          | MRE11         | YNL087W                 | TCB2          |
| YNL291C                                          | MID1          | YDL006W                 | PTC1          |
| YJR084W                                          | CSN12         | YBR181C                 | RPS6B         |
| YDR153C                                          | ENT5          | YER122C                 | GLO3          |
| YER116C                                          | SLX8          | YBL079W                 | NUP170        |
| YMR055C                                          | BUB2          | YLR370C                 | ARC18         |
| YGR108W                                          | CLB1          | YEL050C                 | RML2          |
| YEL056W                                          | HAT2          | YHR114W                 | BZZ1          |
| YDL160C                                          | DHH1          | YPL024W                 | RMI1          |
| YDR443C                                          | SSN2          | YHR200W                 | RPN10         |
| YLR079W                                          | SIC1          | YJL095W                 | BCK1          |
| YJR060W                                          | CBF1          | YOL081W                 | IRA2          |
| YPL057C                                          | SUR1          | YOR014W                 | RTS1          |
| YNL031C                                          | HHT2          | YOR141C                 | ARP8          |
| YKL160W                                          | ELF1          | YJR060W                 | CBF1          |
| YPL024W                                          | RMI1          | YHR156C                 | LIN1          |
| YLR288C                                          | MEC3          | YHR039C-A               | VMA10         |
| YML001W                                          | YPT7          | YBL025W                 | RRN10         |
| YKL057C                                          | NUP120        | YER105C                 | NUP157        |
| YGR261C                                          | APL6          | YOR112W                 | CEX1          |
| YJR060W                                          | CBF1          | YJR135C                 | MCM22         |
| YDR202C                                          | RAV2          | YGL054C                 | ERV14         |
| YJL154C                                          | VPS35         | YLR360W                 | VPS38         |
| YDR318W                                          | MCM21         | YBR114W                 | RAD16         |
| YML012W                                          | ERV25         | YJL004C                 | SYS1          |
| YEL009C                                          | GCN4          | YOL051W                 | GAL11         |
| YNL201C                                          | PSY2          | YKL139W                 | CTK1          |

| Predictions at threshold level 0.80 continued... |               |                         |               |
|--------------------------------------------------|---------------|-------------------------|---------------|
| Gene1 of predicted pair                          |               | Gene2 of predicted pair |               |
| Systematic Name                                  | Standard Name | Systematic Name         | Standard Name |
| YGL147C                                          | RPL9A         | YDR477W                 | SNF1          |
| YPR052C                                          | NHP6A         | YKL139W                 | CTK1          |
| YMR224C                                          | MRE11         | YDR076W                 | RAD55         |
| YLR090W                                          | XDJ1          | YMR311C                 | GLC8          |
| YKL181W                                          | PRS1          | YOR043W                 | WHI2          |
| YJL183W                                          | MNN11         | YER040W                 | GLN3          |
| YLR191W                                          | PEX13         | YAR042W                 | SWH1          |
| YGL215W                                          | CLG1          | YDR137W                 | RGP1          |
| YHR156C                                          | LIN1          | YLR441C                 | RPS1A         |
| YMR153W                                          | NUP53         | YEL060C                 | PRB1          |
| YJL127C                                          | SPT10         | YDR200C                 | VPS64         |
| YJL124C                                          | LSM1          | YPL057C                 | SUR1          |
| YHR016C                                          | YSC84         | YKR030W                 | GMH1          |
| YLR441C                                          | RPS1A         | YDR137W                 | RGP1          |
| YDL185W                                          | TFP1          | YOL081W                 | IRA2          |
| YDR363W-A                                        | SEM1          | YJL140W                 | RPB4          |
| YPL253C                                          | VIK1          | YNL248C                 | RPA49         |
| YMR127C                                          | SAS2          | YJR032W                 | CPR7          |
| YBR258C                                          | SHG1          | YPL161C                 | BEM4          |
| YMR016C                                          | SOK2          | YMR311C                 | GLC8          |
| YFR010W                                          | UBP6          | YLR032W                 | RAD5          |
| YLR441C                                          | RPS1A         | YJL183W                 | MNN11         |
| YBR200W                                          | BEM1          | YGL025C                 | PGD1          |
| YOR312C                                          | RPL20B        | YBL025W                 | RRN10         |
| YNL307C                                          | MCK1          | YPL195W                 | APL5          |
| YML071C                                          | COG8          | YOR035C                 | SHE4          |
| YNL330C                                          | RPD3          | YBR089C-A               | NHP6B         |
| YLR095C                                          | IOC2          | YLR094C                 | GIS3          |
| YJR060W                                          | CBF1          | YFR030W                 | MET10         |

| Predictions at threshold level 0.80 continued... |               |                         |               |
|--------------------------------------------------|---------------|-------------------------|---------------|
| Gene1 of predicted pair                          |               | Gene2 of predicted pair |               |
| Systematic Name                                  | Standard Name | Systematic Name         | Standard Name |
| YEL027W                                          | CUP5          | YDL185W                 | TFP1          |
| YPR171W                                          | BSP1          | YPL050C                 | MNN9          |
| YDR293C                                          | SSD1          | YAL002W                 | VPS8          |
| YBR200W                                          | BEM1          | YEL036C                 | ANP1          |
| YDR310C                                          | SUM1          | YLR350W                 | ORM2          |
| YOR337W                                          | TEA1          | YDR310C                 | SUM1          |
| YOR001W                                          | RRP6          | YDR245W                 | MNN10         |
| YNL215W                                          | IES2          | YGL161C                 | YIP5          |
| YMR199W                                          | CLN1          | YLR452C                 | SST2          |
| YJL006C                                          | CTK2          | YCR086W                 | CSM1          |
| YEL065W                                          | SIT1          | YER139C                 | YER139C       |
| YDR507C                                          | GIN4          | YKL032C                 | IXR1          |
| YGL174W                                          | BUD13         | YBR036C                 | CSG2          |
| YNL069C                                          | RPL16B        | YHR060W                 | VMA22         |
| YLR288C                                          | MEC3          | YCR077C                 | PAT1          |
| YBR173C                                          | UMP1          | YMR153W                 | NUP53         |
| YDL020C                                          | RPN4          | YMR172W                 | HOT1          |
| YAL024C                                          | LTE1          | YMR142C                 | RPL13B        |
| YFR010W                                          | UBP6          | YDL077C                 | VAM6          |
| YDR443C                                          | SSN2          | YPL057C                 | SUR1          |
| YEL053C                                          | MAK10         | YOL108C                 | INO4          |
| YPL137C                                          | GIP3          | YBR280C                 | SAF1          |
| YDL155W                                          | CLB3          | YOR014W                 | RTS1          |
| YBL058W                                          | SHP1          | YDL192W                 | ARF1          |
| YBR264C                                          | YPT10         | YKR014C                 | YPT52         |
| YGR252W                                          | GCN5          | YOR038C                 | HIR2          |
| YBL021C                                          | HAP3          | YGL253W                 | HXK2          |
| YER116C                                          | SLX8          | YOL111C                 | MDY2          |
| YLL039C                                          | UBI4          | YGR135W                 | PRE9          |

| Predictions at threshold level 0.80 continued... |               |                         |               |
|--------------------------------------------------|---------------|-------------------------|---------------|
| Gene1 of predicted pair                          |               | Gene2 of predicted pair |               |
| Systematic Name                                  | Standard Name | Systematic Name         | Standard Name |
| YHR178W                                          | STB5          | YER161C                 | SPT2          |
| YML016C                                          | PPZ1          | YGL252C                 | RTG2          |
| YOR069W                                          | VPS5          | YCL037C                 | SRO9          |
| YGL178W                                          | MPT5          | YER068W                 | MOT2          |
| YBR126C                                          | TPS1          | YKL126W                 | YPK1          |
| YNR072W                                          | HXT17         | YKL048C                 | ELM1          |
| YMR224C                                          | MRE11         | YPR030W                 | CSR2          |
| YLR315W                                          | NKP2          | YGR188C                 | BUB1          |
| YBR274W                                          | CHK1          | YDL059C                 | RAD59         |
| YNL054W                                          | VAC7          | YPR120C                 | CLB5          |
| YPR018W                                          | RLF2          | YGL087C                 | MMS2          |
| YNL297C                                          | MON2          | YJR033C                 | RAV1          |
| YBR030W                                          | YBR030W       | YNL076W                 | MKS1          |
| YHR060W                                          | VMA22         | YGL003C                 | CDH1          |
| YLR452C                                          | SST2          | YER139C                 | YER139C       |
| YGR135W                                          | PRE9          | YFR036W                 | CDC26         |
| YNR072W                                          | HXT17         | YDR310C                 | SUM1          |
| YDL185W                                          | TFP1          | YPR119W                 | CLB2          |
| YLR386W                                          | VAC14         | YOL111C                 | MDY2          |
| YMR224C                                          | MRE11         | YMR153W                 | NUP53         |
| YPL057C                                          | SUR1          | YGL237C                 | HAP2          |
| YIL053W                                          | RHR2          | YMR142C                 | RPL13B        |
| YDR335W                                          | MSN5          | YKL068W                 | NUP100        |
| YOR039W                                          | CKB2          | YNL030W                 | HHF2          |
| YBR111W-A                                        | SUS1          | YAR002W                 | NUP60         |
| YMR198W                                          | CIK1          | YDR076W                 | RAD55         |
| YPL001W                                          | HAT1          | YDR289C                 | RTT103        |
| YJL006C                                          | CTK2          | YDR183W                 | PLP1          |
| YEL053C                                          | MAK10         | YDL192W                 | ARF1          |

| Predictions at threshold level 0.80 continued... |               |                         |               |
|--------------------------------------------------|---------------|-------------------------|---------------|
| Gene1 of predicted pair                          |               | Gene2 of predicted pair |               |
| Systematic Name                                  | Standard Name | Systematic Name         | Standard Name |
| YJL172W                                          | CPS1          | YML001W                 | YPT7          |
| YKR057W                                          | RPS21A        | YKR048C                 | NAP1          |
| YDL184C                                          | RPL41A        | YOL121C                 | RPS19A        |
| YLR192C                                          | HCR1          | YDR310C                 | SUM1          |
| YJL124C                                          | LSM1          | YNL116W                 | DMA2          |
| YJL176C                                          | SWI3          | YGR105W                 | VMA21         |
| YDR080W                                          | VPS41         | YHR039C-A               | VMA10         |
| YHR073W                                          | OSH3          | YML103C                 | NUP188        |
| YML112W                                          | CTK3          | YNL116W                 | DMA2          |
| YNL243W                                          | SLA2          | YOR106W                 | VAM3          |
| YIL156W                                          | UBP7          | YLR079W                 | SIC1          |
| YJL124C                                          | LSM1          | YHR013C                 | ARD1          |
| YDR484W                                          | VPS52         | YHR039C-A               | VMA10         |
| YBR093C                                          | PHO5          | YMR198W                 | CIK1          |
| YBR020W                                          | GAL1          | YJR060W                 | CBF1          |
| YDR443C                                          | SSN2          | YDR477W                 | SNF1          |
| YOR132W                                          | VPS17         | YIL008W                 | URM1          |
| YLR288C                                          | MEC3          | YML013W                 | UBX2          |
| YKL139W                                          | CTK1          | YHR060W                 | VMA22         |
| YJL151C                                          | SNA3          | YNL094W                 | APP1          |
| YDR363W-A                                        | SEM1          | YPR046W                 | MCM16         |
| YMR198W                                          | CIK1          | YNL236W                 | SIN4          |
| YLR018C                                          | POM34         | YKL041W                 | VPS24         |
| YOR039W                                          | CKB2          | YLR399C                 | BDF1          |
| YOR066W                                          | MSA1          | YCR053W                 | THR4          |
| YLR192C                                          | HCR1          | YGL025C                 | PGD1          |
| YDR378C                                          | LSM6          | YHR115C                 | DMA1          |
| YHR012W                                          | VPS29         | YPR032W                 | SRO7          |
| YMR070W                                          | MOT3          | YBR127C                 | VMA2          |



| Predictions at threshold level 0.80 continued... |               |                         |               |
|--------------------------------------------------|---------------|-------------------------|---------------|
| Gene1 of predicted pair                          |               | Gene2 of predicted pair |               |
| Systematic Name                                  | Standard Name | Systematic Name         | Standard Name |
| YIL008W                                          | URM1          | YDR318W                 | MCM21         |
| YLL007C                                          | YLL007C       | YGR019W                 | UGA1          |
| YLR337C                                          | VRP1          | YLR061W                 | RPL22A        |
| YLR090W                                          | XDJ1          | YEL060C                 | PRB1          |
| YMR172W                                          | HOT1          | YLR292C                 | SEC72         |
| YDR137W                                          | RGP1          | YKL080W                 | VMA5          |
| YGR054W                                          | YGR054W       | YDR310C                 | SUM1          |
| YLR119W                                          | SRN2          | YBR171W                 | SEC66         |
| YDR443C                                          | SSN2          | YER049W                 | TPA1          |
| YMR142C                                          | RPL13B        | YKL048C                 | ELM1          |
| YIL076W                                          | SEC28         | YOL108C                 | INO4          |
| YLR119W                                          | SRN2          | YOL081W                 | IRA2          |
| YBR200W                                          | BEM1          | YMR214W                 | SCJ1          |
| YGL066W                                          | SGF73         | YMR199W                 | CLN1          |
| YMR095C                                          | SNO1          | YER122C                 | GLO3          |
| YGL163C                                          | RAD54         | YDR207C                 | UME6          |
| YJR140C                                          | HIR3          | YER161C                 | SPT2          |
| YMR224C                                          | MRE11         | YMR230W                 | RPS10B        |
| YMR224C                                          | MRE11         | YPL057C                 | SUR1          |
| YDR443C                                          | SSN2          | YFR031C-A               | RPL2A         |
| YDR192C                                          | NUP42         | YER116C                 | SLX8          |
| YGR072W                                          | UPF3          | YDR080W                 | VPS41         |
| YPR017C                                          | DSS4          | YNL127W                 | FAR11         |
| YHR060W                                          | VMA22         | YLR452C                 | SST2          |
| YCL029C                                          | BIK1          | YGL190C                 | CDC55         |
| YOR312C                                          | RPL20B        | YOR368W                 | RAD17         |
| YNL069C                                          | RPL16B        | YPL120W                 | VPS30         |
| YOR008C                                          | SLG1          | YER049W                 | TPA1          |
| YPR120C                                          | CLB5          | YPL152W                 | RRD2          |

| Predictions at threshold level 0.80 continued... |               |                         |               |
|--------------------------------------------------|---------------|-------------------------|---------------|
| Gene1 of predicted pair                          |               | Gene2 of predicted pair |               |
| Systematic Name                                  | Standard Name | Systematic Name         | Standard Name |
| YPR051W                                          | MAK3          | YJL095W                 | BCK1          |
| YLR192C                                          | HCR1          | YGR133W                 | PEX4          |
| YFR030W                                          | MET10         | YJR135C                 | MCM22         |
| YBR030W                                          | YBR030W       | YER044C                 | ERG28         |
| YKL007W                                          | CAP1          | YOR208W                 | PTP2          |
| YGL087C                                          | MMS2          | YMR038C                 | CCS1          |
| YHR156C                                          | LIN1          | YBR171W                 | SEC66         |
| YJL154C                                          | VPS35         | YPL037C                 | EGD1          |
| YOR270C                                          | VPH1          | YPL057C                 | SUR1          |
| YML117W                                          | NAB6          | YKL048C                 | ELM1          |
| YBL102W                                          | SFT2          | YEL051W                 | VMA8          |
| YBR290W                                          | BSD2          | YGL124C                 | MON1          |
| YKL139W                                          | CTK1          | YBR200W                 | BEM1          |
| YJR056C                                          | YJR056C       | YPR030W                 | CSR2          |
| YNL201C                                          | PSY2          | YPR046W                 | MCM16         |
| YPL161C                                          | BEM4          | YKL080W                 | VMA5          |
| YIL053W                                          | RHR2          | YER116C                 | SLX8          |
| YOR033C                                          | EXO1          | YLR313C                 | SPH1          |
| YGR019W                                          | UGA1          | YDR155C                 | CPR1          |
| YOR332W                                          | VMA4          | YBR200W                 | BEM1          |
| YLR240W                                          | VPS34         | YJL053W                 | PEP8          |
| YPL129W                                          | TAF14         | YGL246C                 | RAI1          |
| YMR116C                                          | ASC1          | YGL212W                 | VAM7          |
| YOR023C                                          | AHC1          | YDR183W                 | PLP1          |
| YAL024C                                          | LTE1          | YAL002W                 | VPS8          |
| YER110C                                          | KAP123        | YPL256C                 | CLN2          |
| YMR224C                                          | MRE11         | YHR178W                 | STB5          |
| YLR090W                                          | XDJ1          | YHR081W                 | LRP1          |
| YPR018W                                          | RLF2          | YLR288C                 | MEC3          |

| Predictions at threshold level 0.80 continued... |               |                         |               |
|--------------------------------------------------|---------------|-------------------------|---------------|
| Gene1 of predicted pair                          |               | Gene2 of predicted pair |               |
| Systematic Name                                  | Standard Name | Systematic Name         | Standard Name |
| YHR060W                                          | VMA22         | YNL051W                 | COG5          |
| YNL032W                                          | SIW14         | YPR030W                 | CSR2          |
| YMR055C                                          | BUB2          | YHL002W                 | HSE1          |
| YDR004W                                          | RAD57         | YJR140C                 | HIR3          |
| YDR171W                                          | HSP42         | YNL236W                 | SIN4          |
| YDR080W                                          | VPS41         | YDL077C                 | VAM6          |
| YHR013C                                          | ARD1          | YHR115C                 | DMA1          |
| YLR399C                                          | BDF1          | YIL103W                 | DPH1          |
| YDR080W                                          | VPS41         | YMR054W                 | STV1          |
| YML038C                                          | YMD8          | YPR032W                 | SRO7          |
| YHR012W                                          | VPS29         | YER122C                 | GLO3          |
| YOL126C                                          | MDH2          | YCR024C-A               | PMP1          |
| YPR084W                                          | YPR084W       | YOR127W                 | RGA1          |
| YDR496C                                          | PUF6          | YDR101C                 | ARX1          |
| YOR195W                                          | SLK19         | YIL033C                 | BCY1          |
| YGL147C                                          | RPL9A         | YLR119W                 | SRN2          |
| YLR079W                                          | SIC1          | YHR013C                 | ARD1          |
| YGL147C                                          | RPL9A         | YKL126W                 | YPK1          |
| YPL037C                                          | EGD1          | YDR261C                 | EXG2          |
| YBL051C                                          | PIN4          | YDR254W                 | CHL4          |
| YGR249W                                          | MGA1          | YDL192W                 | ARF1          |
| YJL124C                                          | LSM1          | YGR188C                 | BUB1          |
| YER044C                                          | ERG28         | YGL115W                 | SNF4          |
| YFL013C                                          | IES1          | YNL107W                 | YAF9          |
| YDL006W                                          | PTC1          | YKR030W                 | GMH1          |
| YDR318W                                          | MCM21         | YBR036C                 | CSG2          |
| YBR171W                                          | SEC66         | YPR046W                 | MCM16         |
| YGL078C                                          | DBP3          | YGR159C                 | NSR1          |
| YDR507C                                          | GIN4          | YKR057W                 | RPS21A        |

| Predictions at threshold level 0.80 continued... |               |                         |               |
|--------------------------------------------------|---------------|-------------------------|---------------|
| Gene1 of predicted pair                          |               | Gene2 of predicted pair |               |
| Systematic Name                                  | Standard Name | Systematic Name         | Standard Name |
| YPL024W                                          | RMI1          | YLR452C                 | SST2          |
| YNL025C                                          | SSN8          | YNL107W                 | YAF9          |
| YJL154C                                          | VPS35         | YLR386W                 | VAC14         |
| YIL034C                                          | CAP2          | YIL008W                 | URM1          |
| YBL021C                                          | HAP3          | YBR107C                 | IML3          |
| YMR109W                                          | MYO5          | YGL253W                 | HXK2          |
| YDR293C                                          | SSD1          | YGR108W                 | CLB1          |
| YOL111C                                          | MDY2          | YEL053C                 | MAK10         |
| YLR410W                                          | VIP1          | YJL187C                 | SWE1          |
| YEL051W                                          | VMA8          | YKL080W                 | VMA5          |
| YNL291C                                          | MID1          | YLR032W                 | RAD5          |
| YNL058C                                          | YNL058C       | YMR230W                 | RPS10B        |
| YNL206C                                          | RTT106        | YBR010W                 | HHT1          |
| YLL007C                                          | YLL007C       | YMR172W                 | HOT1          |
| YDR293C                                          | SSD1          | YPL180W                 | TCO89         |
| YNL199C                                          | GCR2          | YBR260C                 | RGD1          |
| YMR199W                                          | CLN1          | YHR010W                 | RPL27A        |
| YEL053C                                          | MAK10         | YNL107W                 | YAF9          |
| YMR055C                                          | BUB2          | YER162C                 | RAD4          |
| YER144C                                          | UBP5          | YGL115W                 | SNF4          |
| YPL115C                                          | BEM3          | YGL124C                 | MON1          |
| YOR043W                                          | WHI2          | YDR318W                 | MCM21         |
| YNL293W                                          | MSB3          | YDR310C                 | SUM1          |
| YNL215W                                          | IES2          | YDR289C                 | RTT103        |
| YDR129C                                          | SAC6          | YOR036W                 | PEP12         |
| YKL025C                                          | PAN3          | YJL183W                 | MNN11         |
| YMR198W                                          | CIK1          | YDR171W                 | HSP42         |
| YIR002C                                          | MPH1          | YGL163C                 | RAD54         |
| YPL152W                                          | RRD2          | YJL187C                 | SWE1          |

| Predictions at threshold level 0.80 continued... |               |                         |               |
|--------------------------------------------------|---------------|-------------------------|---------------|
| Gene1 of predicted pair                          |               | Gene2 of predicted pair |               |
| Systematic Name                                  | Standard Name | Systematic Name         | Standard Name |
| YNL238W                                          | KEX2          | YOR035C                 | SHE4          |
| YCR020C-A                                        | MAK31         | YNL291C                 | MID1          |
| YDL160C                                          | DHH1          | YGR252W                 | GCN5          |
| YDR171W                                          | HSP42         | YGL003C                 | CDH1          |
| YLR058C                                          | SHM2          | YMR055C                 | BUB2          |
| YPL037C                                          | EGD1          | YKL048C                 | ELM1          |
| YLR148W                                          | PEP3          | YLR240W                 | VPS34         |
| YHR039C-A                                        | VMA10         | YLR370C                 | ARC18         |
| YBR017C                                          | KAP104        | YDR335W                 | MSN5          |
| YMR224C                                          | MRE11         | YAL002W                 | VPS8          |
| YDR080W                                          | VPS41         | YMR231W                 | PEP5          |
| YDL116W                                          | NUP84         | YKR072C                 | SIS2          |
| YFR010W                                          | UBP6          | YBR280C                 | SAF1          |
| YLR320W                                          | MMS22         | YBR019C                 | GAL10         |
| YDR225W                                          | HTA1          | YPL248C                 | GAL4          |
| YOR033C                                          | EXO1          | YFR010W                 | UBP6          |
| YIL053W                                          | RHR2          | YLR386W                 | VAC14         |
| YDR293C                                          | SSD1          | YKL119C                 | VPH2          |
| YHR200W                                          | RPN10         | YGL163C                 | RAD54         |
| YPR046W                                          | MCM16         | YML028W                 | TSA1          |
| YOR290C                                          | SNF2          | YGL115W                 | SNF4          |
| YPL024W                                          | RMI1          | YLR370C                 | ARC18         |
| YNL307C                                          | MCK1          | YOR327C                 | SNC2          |
| YCR081W                                          | SRB8          | YNL079C                 | TPM1          |
| YGR108W                                          | CLB1          | YPL018W                 | CTF19         |
| YPL045W                                          | VPS16         | YDL226C                 | GCS1          |
| YHR156C                                          | LIN1          | YOL111C                 | MDY2          |
| YBR083W                                          | TEC1          | YDL159W                 | STE7          |
| YGL115W                                          | SNF4          | YPL106C                 | SSE1          |

| Predictions at threshold level 0.80 continued... |               |                         |               |
|--------------------------------------------------|---------------|-------------------------|---------------|
| Gene1 of predicted pair                          |               | Gene2 of predicted pair |               |
| Systematic Name                                  | Standard Name | Systematic Name         | Standard Name |
| YBR200W                                          | BEM1          | YGR134W                 | CAF130        |
| YHR200W                                          | RPN10         | YMR214W                 | SCJ1          |
| YPL024W                                          | RMI1          | YOR043W                 | WHI2          |
| YLR423C                                          | ATG17         | YPR185W                 | ATG13         |
| YGR081C                                          | SLX9          | YGL175C                 | SAE2          |
| YGL060W                                          | YBP2          | YPL022W                 | RAD1          |
| YBR215W                                          | HPC2          | YKL114C                 | APN1          |
| YOR043W                                          | WHI2          | YPR120C                 | CLB5          |
| YBR217W                                          | ATG12         | YMR230W                 | RPS10B        |
| YER144C                                          | UBP5          | YOR327C                 | SNC2          |
| YLR094C                                          | GIS3          | YER040W                 | GLN3          |
| YOR195W                                          | SLK19         | YDL047W                 | SIT4          |
| YIL076W                                          | SEC28         | YGL003C                 | CDH1          |
| YOR270C                                          | VPH1          | YER162C                 | RAD4          |
| YDR245W                                          | MNN10         | YPL253C                 | VIK1          |
| YLR320W                                          | MMS22         | YOL121C                 | RPS19A        |
| YML115C                                          | VAN1          | YJL095W                 | BCK1          |
| YDR108W                                          | GSG1          | YGR188C                 | BUB1          |
| YMR199W                                          | CLN1          | YJL095W                 | BCK1          |
| YPL137C                                          | GIP3          | YOR327C                 | SNC2          |
| YLR234W                                          | TOP3          | YJR084W                 | CSN12         |
| YDR378C                                          | LSM6          | YKR020W                 | VPS51         |
| YBR173C                                          | UMP1          | YJR056C                 | YJR056C       |
| YFL023W                                          | BUD27         | YML001W                 | YPT7          |
| YBR173C                                          | UMP1          | YDL184C                 | RPL41A        |
| YMR142C                                          | RPL13B        | YLR441C                 | RPS1A         |
| YAL042W                                          | ERV46         | YPR119W                 | CLB2          |
| YDR456W                                          | NHX1          | YOR014W                 | RTS1          |
| YBR108W                                          | YBR108W       | YER122C                 | GLO3          |

| Predictions at threshold level 0.80 continued... |               |                         |               |
|--------------------------------------------------|---------------|-------------------------|---------------|
| Gene1 of predicted pair                          |               | Gene2 of predicted pair |               |
| Systematic Name                                  | Standard Name | Systematic Name         | Standard Name |
| YPR036W                                          | VMA13         | YKR099W                 | BAS1          |
| YIL103W                                          | DPH1          | YLR182W                 | SWI6          |
| YDL116W                                          | NUP84         | YMR038C                 | CCS1          |
| YLR079W                                          | SIC1          | YOR008C                 | SLG1          |
| YGR209C                                          | TRX2          | YML028W                 | TSA1          |
| YMR070W                                          | MOT3          | YDL161W                 | ENT1          |
| YPL057C                                          | SUR1          | YEL013W                 | VAC8          |
| YER161C                                          | SPT2          | YHR167W                 | THP2          |
| YOR109W                                          | INP53         | YEL043W                 | YEL043W       |
| YER001W                                          | MNN1          | YGL200C                 | EMP24         |
| YBL102W                                          | SFT2          | YPL195W                 | APL5          |
| YGL078C                                          | DBP3          | YER122C                 | GLO3          |
| YHR012W                                          | VPS29         | YPR046W                 | MCM16         |
| YGR097W                                          | ASK10         | YPL129W                 | TAF14         |
| YBL058W                                          | SHP1          | YOR327C                 | SNC2          |
| YNL309W                                          | STB1          | YMR052W                 | FAR3          |
| YNL069C                                          | RPL16B        | YER114C                 | BOI2          |
| YCR077C                                          | PAT1          | YNL107W                 | YAF9          |
| YHR200W                                          | RPN10         | YPR120C                 | CLB5          |
| YCR020C-A                                        | MAK31         | YJR040W                 | GEF1          |
| YOR358W                                          | HAP5          | YJR032W                 | CPR7          |
| YML038C                                          | YMD8          | YJL004C                 | SYS1          |
| YGR262C                                          | BUD32         | YML056C                 | IMD4          |
| YGL078C                                          | DBP3          | YDR358W                 | GGA1          |
| YKL048C                                          | ELM1          | YCR086W                 | CSM1          |
| YOR069W                                          | VPS5          | YNL051W                 | COG5          |
| YPR046W                                          | MCM16         | YML071C                 | COG8          |
| YBR030W                                          | YBR030W       | YCR053W                 | THR4          |
| YIL034C                                          | CAP2          | YLR360W                 | VPS38         |

| Predictions at threshold level 0.80 continued... |               |                         |               |
|--------------------------------------------------|---------------|-------------------------|---------------|
| Gene1 of predicted pair                          |               | Gene2 of predicted pair |               |
| Systematic Name                                  | Standard Name | Systematic Name         | Standard Name |
| YBR173C                                          | UMP1          | YMR142C                 | RPL13B        |
| YJL176C                                          | SWI3          | YOR312C                 | RPL20B        |
| YDL059C                                          | RAD59         | YBL047C                 | EDE1          |
| YBR108W                                          | YBR108W       | YJL190C                 | RPS22A        |
| YJL124C                                          | LSM1          | YJR135C                 | MCM22         |
| YPL256C                                          | CLN2          | YGR059W                 | SPR3          |
| YNL016W                                          | PUB1          | YLR410W                 | VIP1          |
| YGL095C                                          | VPS45         | YDL226C                 | GCS1          |
| YEL013W                                          | VAC8          | YLR182W                 | SWI6          |
| YBL008W                                          | HIR1          | YMR179W                 | SPT21         |
| YHR156C                                          | LIN1          | YOL121C                 | RPS19A        |
| YKL116C                                          | PRR1          | YCR053W                 | THR4          |
| YLR102C                                          | APC9          | YDR260C                 | SWM1          |
| YLR094C                                          | GIS3          | YER139C                 | YER139C       |
| YBL021C                                          | HAP3          | YHR187W                 | IKI1          |
| YLL039C                                          | UBI4          | YMR116C                 | ASC1          |
| YJL154C                                          | VPS35         | YKR030W                 | GMH1          |
| YGL066W                                          | SGF73         | YHR200W                 | RPN10         |
| YMR142C                                          | RPL13B        | YJL095W                 | BCK1          |
| YNL166C                                          | BNI5          | YJL095W                 | BCK1          |
| YNL041C                                          | COG6          | YAR014C                 | BUD14         |
| YPL137C                                          | GIP3          | YMR311C                 | GLC8          |
| YLR337C                                          | VRP1          | YGR133W                 | PEX4          |
| YGL115W                                          | SNF4          | YPL018W                 | CTF19         |
| YKL007W                                          | CAP1          | YCR077C                 | PAT1          |
| YHL031C                                          | GOS1          | YGL223C                 | COG1          |
| YLR386W                                          | VAC14         | YER144C                 | UBP5          |
| YDR245W                                          | MNN10         | YLR350W                 | ORM2          |
| YKL048C                                          | ELM1          | YNL238W                 | KEX2          |



| Predictions at threshold level 0.80 continued... |               |                         |               |
|--------------------------------------------------|---------------|-------------------------|---------------|
| Gene1 of predicted pair                          |               | Gene2 of predicted pair |               |
| Systematic Name                                  | Standard Name | Systematic Name         | Standard Name |
| YLR119W                                          | SRN2          | YLR370C                 | ARC18         |
| YLR058C                                          | SHM2          | YML095C                 | RAD10         |
| YCL001W                                          | RER1          | YHR039C-A               | VMA10         |
| YGR184C                                          | UBR1          | YFR036W                 | CDC26         |
| YPL253C                                          | VIK1          | YNL199C                 | GCR2          |
| YOL051W                                          | GAL11         | YBR289W                 | SNF5          |
| YOR112W                                          | CEX1          | YHL031C                 | GOS1          |
| YDR443C                                          | SSN2          | YGL033W                 | HOP2          |
| YLR381W                                          | CTF3          | YJR005W                 | APL1          |
| YJR032W                                          | CPR7          | YDR289C                 | RTT103        |
| YBL088C                                          | TEL1          | YDR253C                 | MET32         |
| YNL058C                                          | YNL058C       | YLR370C                 | ARC18         |
| YMR153W                                          | NUP53         | YBR171W                 | SEC66         |
| YGL213C                                          | SKI8          | YLR398C                 | SKI2          |
| YDR443C                                          | SSN2          | YMR026C                 | PEX12         |
| YBL051C                                          | PIN4          | YPR040W                 | TIP41         |
| YAL009W                                          | SPO7          | YMR165C                 | PAH1          |
| YLR360W                                          | VPS38         | YNL079C                 | TPM1          |
| YNL243W                                          | SLA2          | YDR245W                 | MNN10         |
| YLR386W                                          | VAC14         | YLR094C                 | GIS3          |
| YPL042C                                          | SSN3          | YPL106C                 | SSE1          |
| YMR004W                                          | MVP1          | YDR207C                 | UME6          |
| YPL057C                                          | SUR1          | YLR093C                 | NYV1          |
| YLR360W                                          | VPS38         | YER049W                 | TPA1          |
| YCR063W                                          | BUD31         | YJR050W                 | ISY1          |
| YDR477W                                          | SNF1          | YDL223C                 | HBT1          |
| YBR111W-A                                        | SUS1          | YHR167W                 | THP2          |
| YMR172W                                          | HOT1          | YBR114W                 | RAD16         |
| YMR202W                                          | ERG2          | YBR107C                 | IML3          |

| Predictions at threshold level 0.80 continued... |               |                         |               |
|--------------------------------------------------|---------------|-------------------------|---------------|
| Gene1 of predicted pair                          |               | Gene2 of predicted pair |               |
| Systematic Name                                  | Standard Name | Systematic Name         | Standard Name |
| YLR234W                                          | TOP3          | YMR198W                 | CIK1          |
| YBL003C                                          | HTA2          | YGL241W                 | KAP114        |
| YDR137W                                          | RGP1          | YGR105W                 | VMA21         |
| YPL057C                                          | SUR1          | YPR046W                 | MCM16         |
| YMR109W                                          | MYO5          | YGR270W                 | YTA7          |
| YBL051C                                          | PIN4          | YMR109W                 | MYO5          |
| YMR055C                                          | BUB2          | YML028W                 | TSA1          |
| YBR112C                                          | CYC8          | YHL027W                 | RIM101        |
| YJL137C                                          | GLG2          | YLR273C                 | PIG1          |
| YMR273C                                          | ZDS1          | YGR059W                 | SPR3          |
| YPL115C                                          | BEM3          | YGL038C                 | OCH1          |
| YHL031C                                          | GOS1          | YEL053C                 | MAK10         |
| YDR108W                                          | GSG1          | YNR032W                 | PPG1          |
| YKL116C                                          | PRR1          | YJL183W                 | MNN11         |
| YCL037C                                          | SRO9          | YER161C                 | SPT2          |
| YOL090W                                          | MSH2          | YMR038C                 | CCS1          |
| YDR254W                                          | CHL4          | YJL095W                 | BCK1          |
| YKR072C                                          | SIS2          | YBR036C                 | CSG2          |
| YOR195W                                          | SLK19         | YPL018W                 | CTF19         |
| YML112W                                          | CTK3          | YHR115C                 | DMA1          |
| YLR452C                                          | SST2          | YOR035C                 | SHE4          |
| YFL047W                                          | RGD2          | YGR059W                 | SPR3          |
| YGR239C                                          | PEX21         | YAR042W                 | SWH1          |
| YPR084W                                          | YPR084W       | YHR012W                 | VPS29         |
| YDR363W-A                                        | SEM1          | YNL229C                 | URE2          |
| YBR107C                                          | IML3          | YDL013W                 | SLX5          |
| YGR105W                                          | VMA21         | YOL018C                 | TLG2          |
| YIL034C                                          | CAP2          | YHR114W                 | BZZ1          |
| YNR052C                                          | POP2          | YGL175C                 | SAE2          |

| Predictions at threshold level 0.80 continued... |               |                         |               |
|--------------------------------------------------|---------------|-------------------------|---------------|
| Gene1 of predicted pair                          |               | Gene2 of predicted pair |               |
| Systematic Name                                  | Standard Name | Systematic Name         | Standard Name |
| YMR224C                                          | MRE11         | YGR184C                 | UBR1          |
| YMR116C                                          | ASC1          | YLR320W                 | MMS22         |
| YER116C                                          | SLX8          | YBR280C                 | SAF1          |
| YHR156C                                          | LIN1          | YMR311C                 | GLC8          |
| YER019C-A                                        | SBH2          | YGL226C-A               | OST5          |
| YGR081C                                          | SLX9          | YOR368W                 | RAD17         |
| YDR004W                                          | RAD57         | YNL291C                 | MID1          |
| YCR086W                                          | CSM1          | YDR207C                 | UME6          |
| YKL126W                                          | YPK1          | YNL307C                 | MCK1          |
| YBL051C                                          | PIN4          | YHR115C                 | DMA1          |
| YIL034C                                          | CAP2          | YMR127C                 | SAS2          |
| YDR318W                                          | MCM21         | YOL054W                 | PSH1          |
| YDL116W                                          | NUP84         | YLR410W                 | VIP1          |
| YPR017C                                          | DSS4          | YGL054C                 | ERV14         |
| YPL024W                                          | RMI1          | YJR032W                 | CPR7          |
| YGR261C                                          | APL6          | YJL004C                 | SYS1          |
| YHR081W                                          | LRP1          | YJL183W                 | MNN11         |
| YPL050C                                          | MNN9          | YPR154W                 | PIN3          |
| YDR137W                                          | RGP1          | YGR270W                 | YTA7          |
| YNL215W                                          | IES2          | YER122C                 | GLO3          |
| YOR066W                                          | MSA1          | YDR310C                 | SUM1          |
| YBR107C                                          | IML3          | YOR358W                 | HAP5          |
| YIR005W                                          | IST3          | YHR115C                 | DMA1          |
| YLR192C                                          | HCR1          | YMR133W                 | REC114        |
| YNL054W                                          | VAC7          | YIR005W                 | IST3          |
| YOR290C                                          | SNF2          | YCR053W                 | THR4          |
| YML115C                                          | VAN1          | YGR188C                 | BUB1          |
| YBR200W                                          | BEM1          | YPL195W                 | APL5          |
| YBR073W                                          | RDH54         | YDR254W                 | CHL4          |

| Predictions at threshold level 0.80 continued... |               |                         |               |
|--------------------------------------------------|---------------|-------------------------|---------------|
| Gene1 of predicted pair                          |               | Gene2 of predicted pair |               |
| Systematic Name                                  | Standard Name | Systematic Name         | Standard Name |
| YHR013C                                          | ARD1          | YOL054W                 | PSH1          |
| YKR035W-A                                        | DID2          | YOR327C                 | SNC2          |
| YBR131W                                          | CCZ1          | YMR038C                 | CCS1          |
| YNL087W                                          | TCB2          | YDL077C                 | VAM6          |
| YML001W                                          | YPT7          | YOL018C                 | TLG2          |
| YDL013W                                          | SLX5          | YJR135C                 | MCM22         |
| YBR171W                                          | SEC66         | YJL095W                 | BCK1          |
| YDR443C                                          | SSN2          | YAL024C                 | LTE1          |
| YNL058C                                          | YNL058C       | YGL003C                 | CDH1          |
| YHR060W                                          | VMA22         | YER122C                 | GLO3          |
| YDL116W                                          | NUP84         | YLR079W                 | SIC1          |
| YIL034C                                          | CAP2          | YDR144C                 | MKC7          |
| YOR332W                                          | VMA4          | YPR119W                 | CLB2          |
| YPR051W                                          | MAK3          | YBR107C                 | IML3          |
| YJL172W                                          | CPS1          | YJL095W                 | BCK1          |
| YOR112W                                          | CEX1          | YNR032W                 | PPG1          |
| YJR031C                                          | GEA1          | YER122C                 | GLO3          |
| YOR327C                                          | SNC2          | YBR280C                 | SAF1          |
| YMR224C                                          | MRE11         | YML115C                 | VAN1          |
| YJL029C                                          | VPS53         | YDL047W                 | SIT4          |
| YGR108W                                          | CLB1          | YNL107W                 | YAF9          |
| YGR249W                                          | MGA1          | YBR200W                 | BEM1          |
| YKR001C                                          | VPS1          | YJR033C                 | RAV1          |
| YLR371W                                          | ROM2          | YBR036C                 | CSG2          |
| YLR381W                                          | CTF3          | YPL253C                 | VIK1          |
| YPL057C                                          | SUR1          | YNL107W                 | YAF9          |
| YGL215W                                          | CLG1          | YDR358W                 | GGA1          |
| YMR198W                                          | CIK1          | YHR013C                 | ARD1          |
| YML115C                                          | VAN1          | YJR056C                 | YJR056C       |

| Predictions at threshold level 0.80 continued... |               |                         |               |
|--------------------------------------------------|---------------|-------------------------|---------------|
| Gene1 of predicted pair                          |               | Gene2 of predicted pair |               |
| Systematic Name                                  | Standard Name | Systematic Name         | Standard Name |
| YNL087W                                          | TCB2          | YPL037C                 | EGD1          |
| YOR275C                                          | RIM20         | YPL256C                 | CLN2          |
| YOR132W                                          | VPS17         | YML038C                 | YMD8          |
| YBR108W                                          | YBR108W       | YMR055C                 | BUB2          |
| YPL161C                                          | BEM4          | YLR182W                 | SWI6          |
| YOL126C                                          | MDH2          | YKL068W                 | NUP100        |
| YDR383C                                          | NKP1          | YGR188C                 | BUB1          |
| YGL147C                                          | RPL9A         | YMR095C                 | SNO1          |
| YKR072C                                          | SIS2          | YDL059C                 | RAD59         |
| YOR337W                                          | TEA1          | YER040W                 | GLN3          |
| YPL195W                                          | APL5          | YBR019C                 | GAL10         |
| YDR245W                                          | MNN10         | YCL037C                 | SRO9          |
| YPL161C                                          | BEM4          | YOR014W                 | RTS1          |
| YDR443C                                          | SSN2          | YEL060C                 | PRB1          |
| YHR156C                                          | LIN1          | YPR036W                 | VMA13         |
| YDR254W                                          | CHL4          | YOR014W                 | RTS1          |
| YKL181W                                          | PRS1          | YHR030C                 | SLT2          |
| YMR179W                                          | SPT21         | YDL155W                 | CLB3          |
| YJL154C                                          | VPS35         | YDR207C                 | UME6          |
| YNL236W                                          | SIN4          | YPR119W                 | CLB2          |
| YOR106W                                          | VAM3          | YDR440W                 | DOT1          |
| YLR102C                                          | APC9          | YGR135W                 | PRE9          |
| YGR081C                                          | SLX9          | YDR207C                 | UME6          |
| YIL159W                                          | BNR1          | YHR081W                 | LRP1          |
| YER162C                                          | RAD4          | YOL018C                 | TLG2          |
| YPL129W                                          | TAF14         | YMR201C                 | RAD14         |
| YNR052C                                          | POP2          | YKL048C                 | ELM1          |
| YBR194W                                          | SOY1          | YIR005W                 | IST3          |
| YHR134W                                          | WSS1          | YNR052C                 | POP2          |

| Predictions at threshold level 0.80 continued... |               |                         |               |
|--------------------------------------------------|---------------|-------------------------|---------------|
| Gene1 of predicted pair                          |               | Gene2 of predicted pair |               |
| Systematic Name                                  | Standard Name | Systematic Name         | Standard Name |
| YPL001W                                          | HAT1          | YJL124C                 | LSM1          |
| YFR010W                                          | UBP6          | YJL124C                 | LSM1          |
| YBL047C                                          | EDE1          | YDL006W                 | PTC1          |
| YNL209W                                          | SSB2          | YPL240C                 | HSP82         |
| YNL106C                                          | INP52         | YLR254C                 | NDL1          |
| YDR378C                                          | LSM6          | YBL047C                 | EDE1          |
| YLR381W                                          | CTF3          | YLR254C                 | NDL1          |
| YDR477W                                          | SNF1          | YER040W                 | GLN3          |
| YJL127C                                          | SPT10         | YDR318W                 | MCM21         |
| YJL172W                                          | CPS1          | YMR133W                 | REC114        |
| YDR254W                                          | CHL4          | YJR005W                 | APL1          |
| YBR274W                                          | CHK1          | YCR077C                 | PAT1          |
| YAL024C                                          | LTE1          | YPL256C                 | CLN2          |
| YLR090W                                          | XDJ1          | YHR156C                 | LIN1          |
| YDR378C                                          | LSM6          | YER122C                 | GLO3          |
| YDR443C                                          | SSN2          | YMR133W                 | REC114        |
| YGL033W                                          | HOP2          | YPL057C                 | SUR1          |
| YNL218W                                          | MGS1          | YJL124C                 | LSM1          |
| YJL176C                                          | SWI3          | YJL095W                 | BCK1          |
| YJR056C                                          | YJR056C       | YOR327C                 | SNC2          |
| YGR072W                                          | UPF3          | YPL057C                 | SUR1          |
| YBL102W                                          | SFT2          | YJL053W                 | PEP8          |
| YLR320W                                          | MMS22         | YNL238W                 | KEX2          |
| YGL133W                                          | ITC1          | YDR264C                 | AKR1          |
| YER110C                                          | KAP123        | YML057W                 | CMP2          |
| YLR386W                                          | VAC14         | YMR311C                 | GLC8          |
| YMR153W                                          | NUP53         | YHR039C-A               | VMA10         |
| YBR009C                                          | HHF1          | YKR048C                 | NAP1          |
| YKL007W                                          | CAP1          | YER114C                 | BOI2          |

| Predictions at threshold level 0.80 continued... |               |                         |               |
|--------------------------------------------------|---------------|-------------------------|---------------|
| Gene1 of predicted pair                          |               | Gene2 of predicted pair |               |
| Systematic Name                                  | Standard Name | Systematic Name         | Standard Name |
| YDR156W                                          | RPA14         | YLR381W                 | CTF3          |
| YNL291C                                          | MID1          | YER122C                 | GLO3          |
| YDL155W                                          | CLB3          | YMR022W                 | UBC7          |
| YBL102W                                          | SFT2          | YHR060W                 | VMA22         |
| YJL172W                                          | CPS1          | YKR099W                 | BAS1          |
| YJR092W                                          | BUD4          | YPR122W                 | AXL1          |
| YEL065W                                          | SIT1          | YNR072W                 | HXT17         |
| YJL172W                                          | CPS1          | YBL025W                 | RRN10         |
| YOL054W                                          | PSH1          | YNL225C                 | CNM67         |
| YBR057C                                          | MUM2          | YEL044W                 | IES6          |
| YNL297C                                          | MON2          | YHR039C-A               | VMA10         |
| YGL147C                                          | RPL9A         | YBR019C                 | GAL10         |
| YEL009C                                          | GCN4          | YDR448W                 | ADA2          |
| YGR261C                                          | APL6          | YLR093C                 | NYV1          |
| YER143W                                          | DDI1          | YPR032W                 | SRO7          |
| YOR270C                                          | VPH1          | YLR441C                 | RPS1A         |
| YDR254W                                          | CHL4          | YLR315W                 | NKP2          |
| YGL115W                                          | SNF4          | YNR032W                 | PPG1          |
| YFR031C-A                                        | RPL2A         | YNL051W                 | COG5          |
| YKL116C                                          | PRR1          | YLR370C                 | ARC18         |
| YOR106W                                          | VAM3          | YDR202C                 | RAV2          |
| YGL200C                                          | EMP24         | YPL213W                 | LEA1          |
| YDL155W                                          | CLB3          | YOR141C                 | ARP8          |
| YNL106C                                          | INP52         | YPL079W                 | RPL21B        |
| YGL175C                                          | SAE2          | YJL187C                 | SWE1          |
| YHL031C                                          | GOS1          | YKL213C                 | DOA1          |
| YDR443C                                          | SSN2          | YHR081W                 | LRP1          |
| YGR054W                                          | YGR054W       | YDL155W                 | CLB3          |
| YJL140W                                          | RPB4          | YOR064C                 | YNG1          |

| Predictions at threshold level 0.80 continued... |               |                         |               |
|--------------------------------------------------|---------------|-------------------------|---------------|
| Gene1 of predicted pair                          |               | Gene2 of predicted pair |               |
| Systematic Name                                  | Standard Name | Systematic Name         | Standard Name |
| YDR309C                                          | GIC2          | YJL095W                 | BCK1          |
| YOR127W                                          | RGA1          | YPL018W                 | CTF19         |
| YDR439W                                          | LRS4          | YNL225C                 | CNM67         |
| YLR337C                                          | VRP1          | YML097C                 | VPS9          |
| YDL184C                                          | RPL41A        | YKR035W-A               | DID2          |
| YDR176W                                          | NGG1          | YKR048C                 | NAP1          |
| YER116C                                          | SLX8          | YPR046W                 | MCM16         |
| YAL024C                                          | LTE1          | YEL056W                 | HAT2          |
| YIL053W                                          | RHR2          | YOR270C                 | VPH1          |
| YEL009C                                          | GCN4          | YOL148C                 | SPT20         |
| YAL024C                                          | LTE1          | YLR119W                 | SRN2          |
| YLR360W                                          | VPS38         | YDR477W                 | SNF1          |
| YMR202W                                          | ERG2          | YJR060W                 | CBF1          |
| YOR270C                                          | VPH1          | YEL027W                 | CUP5          |
| YMR224C                                          | MRE11         | YGL175C                 | SAE2          |
| YMR127C                                          | SAS2          | YJL095W                 | BCK1          |
| YKR001C                                          | VPS1          | YDL226C                 | GCS1          |
| YML115C                                          | VAN1          | YDL184C                 | RPL41A        |
| YDR335W                                          | MSN5          | YPL161C                 | BEM4          |
| YMR205C                                          | PFK2          | YBL101C                 | ECM21         |
| YHR039C-A                                        | VMA10         | YDR261C                 | EXG2          |
| YJL176C                                          | SWI3          | YNL329C                 | PEX6          |
| YFR010W                                          | UBP6          | YPL248C                 | GAL4          |
| YJR063W                                          | RPA12         | YBR009C                 | HHF1          |
| YNL087W                                          | TCB2          | YER139C                 | YER139C       |
| YDL155W                                          | CLB3          | YNL079C                 | TPM1          |
| YGL147C                                          | RPL9A         | YNL032W                 | SIW14         |
| YLR386W                                          | VAC14         | YMR133W                 | REC114        |
| YLR447C                                          | VMA6          | YNL238W                 | KEX2          |



| Predictions at threshold level 0.80 continued... |               |                         |               |
|--------------------------------------------------|---------------|-------------------------|---------------|
| Gene1 of predicted pair                          |               | Gene2 of predicted pair |               |
| Systematic Name                                  | Standard Name | Systematic Name         | Standard Name |
| YEL059C-A                                        | SOM1          | YMR035W                 | IMP2          |
| YDL020C                                          | RPN4          | YOR023C                 | AHC1          |
| YGL078C                                          | DBP3          | YPL057C                 | SUR1          |
| YLR079W                                          | SIC1          | YMR273C                 | ZDS1          |
| YDL013W                                          | SLX5          | YPL018W                 | CTF19         |
| YBR200W                                          | BEM1          | YKL032C                 | IXR1          |
| YML016C                                          | PPZ1          | YDL155W                 | CLB3          |
| YKL126W                                          | YPK1          | YLR093C                 | NYV1          |
| YBR171W                                          | SEC66         | YLR093C                 | NYV1          |
| YLR447C                                          | VMA6          | YDR144C                 | MKC7          |
| YDR245W                                          | MNN10         | YOR367W                 | SCP1          |
| YDR245W                                          | MNN10         | YBL067C                 | UBP13         |
| YDR071C                                          | PAA1          | YER068W                 | MOT2          |
| YPL022W                                          | RAD1          | YJR090C                 | GRR1          |
| YDR174W                                          | HMO1          | YBR073W                 | RDH54         |
| YFR010W                                          | UBP6          | YMR167W                 | MLH1          |
| YJL060W                                          | BNA3          | YJR135C                 | MCM22         |
| YDL125C                                          | HNT1          | YDL047W                 | SIT4          |
| YDR363W-A                                        | SEM1          | YGR232W                 | NAS6          |
| YMR224C                                          | MRE11         | YGR275W                 | RTT102        |
| YMR216C                                          | SKY1          | YPL120W                 | VPS30         |
| YBL058W                                          | SHP1          | YPL195W                 | APL5          |
| YIL159W                                          | BNR1          | YLR093C                 | NYV1          |
| YLR337C                                          | VRP1          | YGL212W                 | VAM7          |
| YHR200W                                          | RPN10         | YER162C                 | RAD4          |
| YKL048C                                          | ELM1          | YMR311C                 | GLC8          |
| YBR171W                                          | SEC66         | YMR214W                 | SCJ1          |
| YBL103C                                          | RTG3          | YFR036W                 | CDC26         |
| YKL160W                                          | ELF1          | YGR135W                 | PRE9          |

| Predictions at threshold level 0.80 continued... |               |                         |               |
|--------------------------------------------------|---------------|-------------------------|---------------|
| Gene1 of predicted pair                          |               | Gene2 of predicted pair |               |
| Systematic Name                                  | Standard Name | Systematic Name         | Standard Name |
| YGL078C                                          | DBP3          | YGL033W                 | HOP2          |
| YKL025C                                          | PAN3          | YBR274W                 | CHK1          |
| YLR018C                                          | POM34         | YGL016W                 | KAP122        |
| YJR060W                                          | CBF1          | YPR046W                 | MCM16         |
| YER161C                                          | SPT2          | YLR315W                 | NKP2          |
| YOR132W                                          | VPS17         | YPR046W                 | MCM16         |
| YLR095C                                          | IOC2          | YMR142C                 | RPL13B        |
| YJL183W                                          | MNN11         | YER122C                 | GLO3          |
| YBR173C                                          | UMP1          | YDR335W                 | MSN5          |
| YIL076W                                          | SEC28         | YOR069W                 | VPS5          |
| YDR477W                                          | SNF1          | YBR108W                 | YBR108W       |
| YIL076W                                          | SEC28         | YLR309C                 | IMH1          |
| YPL152W                                          | RRD2          | YOL081W                 | IRA2          |
| YDR443C                                          | SSN2          | YLR093C                 | NYV1          |
| YLR441C                                          | RPS1A         | YGL003C                 | CDH1          |
| YNL058C                                          | YNL058C       | YML001W                 | YPT7          |
| YBR133C                                          | HSL7          | YJL187C                 | SWE1          |
| YLR192C                                          | HCR1          | YGL115W                 | SNF4          |
| YGR184C                                          | UBR1          | YJR135C                 | MCM22         |
| YLR337C                                          | VRP1          | YKL032C                 | IXR1          |
| YKR072C                                          | SIS2          | YBR278W                 | DPB3          |
| YJL127C                                          | SPT10         | YDR335W                 | MSN5          |
| YOR038C                                          | HIR2          | YFR036W                 | CDC26         |
| YML016C                                          | PPZ1          | YIL103W                 | DPH1          |
| YNL041C                                          | COG6          | YMR311C                 | GLC8          |
| YOR083W                                          | WHI5          | YOR195W                 | SLK19         |
| YNL032W                                          | SIW14         | YER040W                 | GLN3          |
| YDR320C                                          | SWA2          | YNL238W                 | KEX2          |
| YNL229C                                          | URE2          | YJL095W                 | BCK1          |

| Predictions at threshold level 0.80 continued... |               |                         |               |
|--------------------------------------------------|---------------|-------------------------|---------------|
| Gene1 of predicted pair                          |               | Gene2 of predicted pair |               |
| Systematic Name                                  | Standard Name | Systematic Name         | Standard Name |
| YNL264C                                          | PDR17         | YGL200C                 | EMP24         |
| YJR056C                                          | YJR056C       | YEL060C                 | PRB1          |
| YJL053W                                          | PEP8          | YHL020C                 | OPI1          |
| YLR206W                                          | ENT2          | YJR125C                 | ENT3          |
| YNL236W                                          | SIN4          | YGL094C                 | PAN2          |
| YOR270C                                          | VPH1          | YMR054W                 | STV1          |
| YNR052C                                          | POP2          | YNL248C                 | RPA49         |
| YPR051W                                          | MAK3          | YAL002W                 | VPS8          |
| YDL006W                                          | PTC1          | YDL077C                 | VAM6          |
| YBR128C                                          | ATG14         | YPL120W                 | VPS30         |
| YCR020C-A                                        | MAK31         | YPR051W                 | MAK3          |
| YDL232W                                          | OST4          | YIL162W                 | SUC2          |
| YML103C                                          | NUP188        | YBR200W                 | BEM1          |
| YPL161C                                          | BEM4          | YDL240W                 | LRG1          |
| YGL200C                                          | EMP24         | YLR425W                 | TUS1          |
| YPL050C                                          | MNN9          | YGL200C                 | EMP24         |
| YDR174W                                          | HMO1          | YHR111W                 | UBA4          |
| YEL043W                                          | YEL043W       | YAR014C                 | BUD14         |
| YPL161C                                          | BEM4          | YOR327C                 | SNC2          |
| YBR173C                                          | UMP1          | YPL253C                 | VIK1          |
| YHR108W                                          | GGA2          | YHL011C                 | PRS3          |
| YLR337C                                          | VRP1          | YGL135W                 | RPL1B         |
| YKL139W                                          | CTK1          | YIR005W                 | IST3          |
| YHR012W                                          | VPS29         | YMR311C                 | GLC8          |
| YOR195W                                          | SLK19         | YLR410W                 | VIP1          |
| YDL160C                                          | DHH1          | YCR077C                 | PAT1          |
| YBR173C                                          | UMP1          | YER116C                 | SLX8          |
| YBR274W                                          | CHK1          | YBR036C                 | CSG2          |
| YDL020C                                          | RPN4          | YER110C                 | KAP123        |

| Predictions at threshold level 0.80 continued... |               |                         |               |
|--------------------------------------------------|---------------|-------------------------|---------------|
| Gene1 of predicted pair                          |               | Gene2 of predicted pair |               |
| Systematic Name                                  | Standard Name | Systematic Name         | Standard Name |
| YML062C                                          | MFT1          | YHR081W                 | LRP1          |
| YMR026C                                          | PEX12         | YDR261C                 | EXG2          |
| YOR195W                                          | SLK19         | YDR171W                 | HSP42         |
| YFR036W                                          | CDC26         | YLR182W                 | SWI6          |
| YPL018W                                          | CTF19         | YJR090C                 | GRR1          |
| YAL024C                                          | LTE1          | YNL106C                 | INP52         |
| YPL161C                                          | BEM4          | YJR060W                 | CBF1          |
| YMR194W                                          | RPL36A        | YGL246C                 | RAI1          |
| YMR026C                                          | PEX12         | YFR010W                 | UBP6          |
| YMR109W                                          | MYO5          | YJL190C                 | RPS22A        |
| YMR224C                                          | MRE11         | YNL238W                 | KEX2          |
| YLR381W                                          | CTF3          | YOR014W                 | RTS1          |
| YCL001W                                          | RER1          | YJL004C                 | SYS1          |
| YDR080W                                          | VPS41         | YML001W                 | YPT7          |
| YBR107C                                          | IML3          | YML028W                 | TSA1          |
| YGR019W                                          | UGA1          | YNL107W                 | YAF9          |
| YFL013C                                          | IES1          | YMR038C                 | CCS1          |
| YNL135C                                          | FPR1          | YNL023C                 | FAP1          |
| YKL117W                                          | SBA1          | YKL068W                 | NUP100        |
| YKR001C                                          | VPS1          | YDR289C                 | RTT103        |
| YFL033C                                          | RIM15         | YLR309C                 | IMH1          |
| YDL232W                                          | OST4          | YEL036C                 | ANP1          |
| YMR016C                                          | SOK2          | YDL083C                 | RPS16B        |
| YBR171W                                          | SEC66         | YGR270W                 | YTA7          |
| YPL018W                                          | CTF19         | YGL253W                 | HXK2          |
| YHR134W                                          | WSS1          | YHR077C                 | NMD2          |
| YDR108W                                          | GSG1          | YKR030W                 | GMH1          |
| YHR039C-A                                        | VMA10         | YOL108C                 | INO4          |
| YBR030W                                          | YBR030W       | YOL081W                 | IRA2          |

| Predictions at threshold level 0.80 continued... |               |                         |               |
|--------------------------------------------------|---------------|-------------------------|---------------|
| Gene1 of predicted pair                          |               | Gene2 of predicted pair |               |
| Systematic Name                                  | Standard Name | Systematic Name         | Standard Name |
| YLR216C                                          | CPR6          | YKL117W                 | SBA1          |
| YML115C                                          | VAN1          | YBR171W                 | SEC66         |
| YDR137W                                          | RGP1          | YML001W                 | YPT7          |
| YDR176W                                          | NGG1          | YDR469W                 | SDC1          |
| YKL135C                                          | APL2          | YOR036W                 | PEP12         |
| YBR111W-A                                        | SUS1          | YOR001W                 | RRP6          |
| YBR126C                                          | TPS1          | YPL037C                 | EGD1          |
| YML038C                                          | YMD8          | YPL234C                 | TFP3          |
| YBR171W                                          | SEC66         | YKL161C                 | YKL161C       |
| YCR065W                                          | HCM1          | YOR308C                 | SNU66         |
| YHR012W                                          | VPS29         | YBR114W                 | RAD16         |
| YOR001W                                          | RRP6          | YOR141C                 | ARP8          |
| YBR290W                                          | BSD2          | YMR127C                 | SAS2          |
| YIL036W                                          | CST6          | YIR005W                 | IST3          |
| YJR060W                                          | CBF1          | YJR033C                 | RAV1          |
| YGL223C                                          | COG1          | YAL002W                 | VPS8          |
| YJL176C                                          | SWI3          | YLR131C                 | ACE2          |
| YGL060W                                          | YBP2          | YPL018W                 | CTF19         |
| YER120W                                          | SCS2          | YNL051W                 | COG5          |
| YOR112W                                          | CEX1          | YHR039C-A               | VMA10         |
| YBR030W                                          | YBR030W       | YLR320W                 | MMS22         |
| YLR094C                                          | GIS3          | YLR370C                 | ARC18         |
| YLR079W                                          | SIC1          | YOR368W                 | RAD17         |
| YHR060W                                          | VMA22         | YLR309C                 | IMH1          |
| YGL066W                                          | SGF73         | YKR048C                 | NAP1          |
| YBR200W                                          | BEM1          | YOL121C                 | RPS19A        |
| YBR030W                                          | YBR030W       | YGL124C                 | MON1          |
| YBR030W                                          | YBR030W       | YOR270C                 | VPH1          |
| YDL116W                                          | NUP84         | YBL079W                 | NUP170        |

| Predictions at threshold level 0.80 continued... |               |                         |               |
|--------------------------------------------------|---------------|-------------------------|---------------|
| Gene1 of predicted pair                          |               | Gene2 of predicted pair |               |
| Systematic Name                                  | Standard Name | Systematic Name         | Standard Name |
| YIL076W                                          | SEC28         | YER139C                 | YER139C       |
| YMR198W                                          | CIK1          | YER114C                 | BOI2          |
| YLR095C                                          | IOC2          | YMR230W                 | RPS10B        |
| YGL147C                                          | RPL9A         | YMR016C                 | SOK2          |
| YOR127W                                          | RGA1          | YNL229C                 | URE2          |
| YDL116W                                          | NUP84         | YFL047W                 | RGD2          |
| YDR477W                                          | SNF1          | YLR371W                 | ROM2          |
| YLR452C                                          | SST2          | YDR261C                 | EXG2          |
| YLR386W                                          | VAC14         | YGL019W                 | CKB1          |
| YIL005W                                          | EPS1          | YPL106C                 | SSE1          |
| YHR134W                                          | WSS1          | YMR038C                 | CCS1          |
| YGR261C                                          | APL6          | YBL078C                 | ATG8          |
| YDR195W                                          | REF2          | YER032W                 | FIR1          |
| YCR088W                                          | ABP1          | YDR323C                 | PEP7          |
| YBL058W                                          | SHP1          | YPL137C                 | GIP3          |
| YLR360W                                          | VPS38         | YGL223C                 | COG1          |
| YLR432W                                          | IMD3          | YML056C                 | IMD4          |
| YGR108W                                          | CLB1          | YCR086W                 | CSM1          |
| YPL057C                                          | SUR1          | YPL037C                 | EGD1          |
| YMR198W                                          | CIK1          | YJL183W                 | MNN11         |
| YOR083W                                          | WHI5          | YDL226C                 | GCS1          |
| YML062C                                          | MFT1          | YER063W                 | THO1          |
| YPL253C                                          | VIK1          | YNL307C                 | MCK1          |
| YLR192C                                          | HCR1          | YDL192W                 | ARF1          |
| YKL094W                                          | YJU3          | YKL140W                 | TGL1          |
| YMR055C                                          | BUB2          | YLR447C                 | VMA6          |
| YPL042C                                          | SSN3          | YDR477W                 | SNF1          |
| YPL037C                                          | EGD1          | YHL020C                 | OPI1          |
| YDL192W                                          | ARF1          | YNL076W                 | MKS1          |

| Predictions at threshold level 0.80 continued... |               |                         |               |
|--------------------------------------------------|---------------|-------------------------|---------------|
| Gene1 of predicted pair                          |               | Gene2 of predicted pair |               |
| Systematic Name                                  | Standard Name | Systematic Name         | Standard Name |
| YLR192C                                          | HCR1          | YBL047C                 | EDE1          |
| YLR292C                                          | SEC72         | YKL048C                 | ELM1          |
| YLL026W                                          | HSP104        | YGR275W                 | RTT102        |
| YML071C                                          | COG8          | YOR327C                 | SNC2          |
| YJR058C                                          | APS2          | YPL259C                 | APM1          |
| YNL041C                                          | COG6          | YOL121C                 | RPS19A        |
| YDR080W                                          | VPS41         | YDL192W                 | ARF1          |
| YOR191W                                          | RIS1          | YGR071C                 | YGR071C       |
| YOL018C                                          | TLG2          | YAR014C                 | BUD14         |
| YBR195C                                          | MSI1          | YFR036W                 | CDC26         |
| YBR057C                                          | MUM2          | YNL079C                 | TPM1          |
| YPL024W                                          | RMI1          | YDL059C                 | RAD59         |
| YMR127C                                          | SAS2          | YOR213C                 | SAS5          |
| YMR026C                                          | PEX12         | YJL183W                 | MNN11         |
| YKR072C                                          | SIS2          | YPR120C                 | CLB5          |
| YAL010C                                          | MDM10         | YLR315W                 | NKP2          |
| YDR363W-A                                        | SEM1          | YDL047W                 | SIT4          |
| YDR335W                                          | MSN5          | YKL048C                 | ELM1          |
| YDL116W                                          | NUP84         | YDR289C                 | RTT103        |
| YNL325C                                          | FIG4          | YER040W                 | GLN3          |
| YIL053W                                          | RHR2          | YIL159W                 | BNR1          |
| YIL148W                                          | RPL40A        | YPL178W                 | CBC2          |
| YER161C                                          | SPT2          | YLR182W                 | SWI6          |
| YBL103C                                          | RTG3          | YBR036C                 | CSG2          |
| YDR439W                                          | LRS4          | YKR061W                 | KTR2          |
| YDL006W                                          | PTC1          | YNR032W                 | PPG1          |
| YDL184C                                          | RPL41A        | YLR320W                 | MMS22         |
| YGR072W                                          | UPF3          | YHL031C                 | GOS1          |
| YML095C                                          | RAD10         | YHR115C                 | DMA1          |

| Predictions at threshold level 0.80 continued... |               |                         |               |
|--------------------------------------------------|---------------|-------------------------|---------------|
| Gene1 of predicted pair                          |               | Gene2 of predicted pair |               |
| Systematic Name                                  | Standard Name | Systematic Name         | Standard Name |
| YLR452C                                          | SST2          | YPL018W                 | CTF19         |
| YMR153W                                          | NUP53         | YNL199C                 | GCR2          |
| YGL078C                                          | DBP3          | YOL081W                 | IRA2          |
| YNR052C                                          | POP2          | YOL081W                 | IRA2          |
| YDR101C                                          | ARX1          | YOR312C                 | RPL20B        |
| YJR059W                                          | PTK2          | YML057W                 | CMP2          |
| YLR386W                                          | VAC14         | YNL116W                 | DMA2          |
| YOR275C                                          | RIM20         | YDL155W                 | CLB3          |
| YOL091W                                          | SPO21         | YDL226C                 | GCS1          |
| YNR052C                                          | POP2          | YPR046W                 | MCM16         |
| YLR386W                                          | VAC14         | YNL238W                 | KEX2          |
| YPL042C                                          | SSN3          | YLR079W                 | SIC1          |
| YPR046W                                          | MCM16         | YPL195W                 | APL5          |
| YDR378C                                          | LSM6          | YDL155W                 | CLB3          |
| YGL161C                                          | YIP5          | YPR119W                 | CLB2          |
| YBR017C                                          | KAP104        | YBL079W                 | NUP170        |
| YJL095W                                          | BCK1          | YGR188C                 | BUB1          |
| YGL237C                                          | HAP2          | YGL003C                 | CDH1          |
| YHR178W                                          | STB5          | YDR144C                 | MKC7          |
| YDR108W                                          | GSG1          | YDR469W                 | SDC1          |
| YLR192C                                          | HCR1          | YDR207C                 | UME6          |
| YDL020C                                          | RPN4          | YDR076W                 | RAD55         |
| YKL139W                                          | CTK1          | YNL236W                 | SIN4          |
| YPR036W                                          | VMA13         | YKL080W                 | VMA5          |
| YLR094C                                          | GIS3          | YML059C                 | NTE1          |
| YDR097C                                          | MSH6          | YOR368W                 | RAD17         |
| YBR107C                                          | IML3          | YDR289C                 | RTT103        |
| YLR093C                                          | NYV1          | YMR152W                 | YIM1          |
| YOR358W                                          | HAP5          | YDR254W                 | CHL4          |



| Predictions at threshold level 0.80 continued... |               |                         |               |
|--------------------------------------------------|---------------|-------------------------|---------------|
| Gene1 of predicted pair                          |               | Gene2 of predicted pair |               |
| Systematic Name                                  | Standard Name | Systematic Name         | Standard Name |
| YNL229C                                          | URE2          | YHR115C                 | DMA1          |
| YML012W                                          | ERV25         | YNL041C                 | COG6          |
| YBR108W                                          | YBR108W       | YPR046W                 | MCM16         |
| YDR261C                                          | EXG2          | YMR152W                 | YIM1          |
| YIL159W                                          | BNR1          | YER162C                 | RAD4          |
| YDL047W                                          | SIT4          | YNL116W                 | DMA2          |
| YHR079C                                          | IRE1          | YOR036W                 | PEP12         |
| YFL033C                                          | RIM15         | YNL238W                 | KEX2          |
| YML103C                                          | NUP188        | YLR386W                 | VAC14         |
| YDR108W                                          | GSG1          | YNL051W                 | COG5          |
| YOR358W                                          | HAP5          | YJL183W                 | MNN11         |
| YKR099W                                          | BAS1          | YFR036W                 | CDC26         |
| YMR224C                                          | MRE11         | YNL107W                 | YAF9          |
| YKL006W                                          | RPL14A        | YLR425W                 | TUS1          |
| YNL291C                                          | MID1          | YGR105W                 | VMA21         |
| YMR016C                                          | SOK2          | YNL307C                 | MCK1          |
| YNL201C                                          | PSY2          | YPL253C                 | VIK1          |
| YDL101C                                          | DUN1          | YMR224C                 | MRE11         |
| YJL176C                                          | SWI3          | YPL129W                 | TAF14         |
| YER044C                                          | ERG28         | YER139C                 | YER139C       |
| YGL078C                                          | DBP3          | YNL087W                 | TCB2          |
| YHR205W                                          | SCH9          | YER111C                 | SWI4          |
| YLR043C                                          | TRX1          | YML028W                 | TSA1          |
| YLR234W                                          | TOP3          | YCR086W                 | CSM1          |
| YDR004W                                          | RAD57         | YAL024C                 | LTE1          |
| YKL139W                                          | CTK1          | YJR032W                 | CPR7          |
| YFR010W                                          | UBP6          | YLR094C                 | GIS3          |
| YLR452C                                          | SST2          | YHR039C-A               | VMA10         |
| YJL187C                                          | SWE1          | YGL019W                 | CKB1          |

| Predictions at threshold level 0.80 continued... |               |                         |               |
|--------------------------------------------------|---------------|-------------------------|---------------|
| Gene1 of predicted pair                          |               | Gene2 of predicted pair |               |
| Systematic Name                                  | Standard Name | Systematic Name         | Standard Name |
| YJL172W                                          | CPS1          | YER122C                 | GLO3          |
| YMR095C                                          | SNO1          | YLR398C                 | SKI2          |
| YML115C                                          | VAN1          | YDR484W                 | VPS52         |
| YJR060W                                          | CBF1          | YAL002W                 | VPS8          |
| YDR358W                                          | GGA1          | YGL124C                 | MON1          |
| YBL103C                                          | RTG3          | YOR327C                 | SNC2          |
| YLR441C                                          | RPS1A         | YER040W                 | GLN3          |
| YNL069C                                          | RPL16B        | YJL053W                 | PEP8          |
| YFL023W                                          | BUD27         | YOL081W                 | IRA2          |
| YPL161C                                          | BEM4          | YML038C                 | YMD8          |
| YBR173C                                          | UMP1          | YLR180W                 | SAM1          |
| YDL184C                                          | RPL41A        | YDR137W                 | RGP1          |
| YNL058C                                          | YNL058C       | YLR093C                 | NYV1          |
| YGR261C                                          | APL6          | YOR069W                 | VPS5          |
| YMR224C                                          | MRE11         | YBL025W                 | RRN10         |
| YLR095C                                          | IOC2          | YNL325C                 | FIG4          |
| YBR217W                                          | ATG12         | YNR007C                 | ATG3          |
| YDR137W                                          | RGP1          | YGL003C                 | CDH1          |
| YGL115W                                          | SNF4          | YHR012W                 | VPS29         |
| YDR443C                                          | SSN2          | YOR140W                 | SFL1          |
| YIL053W                                          | RHR2          | YPR046W                 | MCM16         |
| YER116C                                          | SLX8          | YMR199W                 | CLN1          |
| YOR001W                                          | RRP6          | YBR010W                 | HHT1          |
| YMR142C                                          | RPL13B        | YPR046W                 | MCM16         |
| YHR081W                                          | LRP1          | YBR280C                 | SAF1          |
| YBR030W                                          | YBR030W       | YHR200W                 | RPN10         |
| YJL176C                                          | SWI3          | YLR370C                 | ARC18         |
| YJR056C                                          | YJR056C       | YJR084W                 | CSN12         |
| YNL025C                                          | SSN8          | YLR315W                 | NKP2          |

| Predictions at threshold level 0.80 continued... |               |                         |               |
|--------------------------------------------------|---------------|-------------------------|---------------|
| Gene1 of predicted pair                          |               | Gene2 of predicted pair |               |
| Systematic Name                                  | Standard Name | Systematic Name         | Standard Name |
| YLR043C                                          | TRX1          | YPL195W                 | APL5          |
| YER059W                                          | PCL6          | YOR028C                 | CIN5          |
| YKL048C                                          | ELM1          | YMR152W                 | YIM1          |
| YKR001C                                          | VPS1          | YNL238W                 | KEX2          |
| YMR142C                                          | RPL13B        | YKL126W                 | YPK1          |
| YIL156W                                          | UBP7          | YMR199W                 | CLN1          |
| YPL057C                                          | SUR1          | YER139C                 | YER139C       |
| YMR026C                                          | PEX12         | YDR358W                 | GGA1          |
| YMR205C                                          | PFK2          | YJL095W                 | BCK1          |
| YJL176C                                          | SWI3          | YLR192C                 | HCR1          |
| YMR224C                                          | MRE11         | YDR477W                 | SNF1          |
| YOR112W                                          | CEX1          | YDR080W                 | VPS41         |
| YML103C                                          | NUP188        | YNL248C                 | RPA49         |
| YDR318W                                          | MCM21         | YLR254C                 | NDL1          |
| YLR396C                                          | VPS33         | YDL226C                 | GCS1          |
| YLR360W                                          | VPS38         | YLR309C                 | IMH1          |
| YDR202C                                          | RAV2          | YOR109W                 | INP53         |
| YKL139W                                          | CTK1          | YNL248C                 | RPA49         |
| YMR224C                                          | MRE11         | YMR026C                 | PEX12         |
| YML095C                                          | RAD10         | YPL018W                 | CTF19         |
| YDR335W                                          | MSN5          | YNL107W                 | YAF9          |
| YMR199W                                          | CLN1          | YBR260C                 | RGD1          |
| YNL218W                                          | MGS1          | YER116C                 | SLX8          |
| YML016C                                          | PPZ1          | YKL161C                 | YKL161C       |
| YEL022W                                          | GEA2          | YDL226C                 | GCS1          |
| YLR452C                                          | SST2          | YLR371W                 | ROM2          |
| YML097C                                          | VPS9          | YAL002W                 | VPS8          |
| YNL025C                                          | SSN8          | YGR270W                 | YTA7          |
| YGR159C                                          | NSR1          | YDR245W                 | MNN10         |

| Predictions at threshold level 0.80 continued... |               |                         |               |
|--------------------------------------------------|---------------|-------------------------|---------------|
| Gene1 of predicted pair                          |               | Gene2 of predicted pair |               |
| Systematic Name                                  | Standard Name | Systematic Name         | Standard Name |
| YJR056C                                          | YJR056C       | YLR371W                 | ROM2          |
| YKL101W                                          | HSL1          | YNL116W                 | DMA2          |
| YMR109W                                          | MYO5          | YDR318W                 | MCM21         |
| YDR378C                                          | LSM6          | YLR315W                 | NKP2          |
| YKL117W                                          | SBA1          | YMR125W                 | STO1          |
| YBL072C                                          | RPS8A         | YKL041W                 | VPS24         |
| YOR078W                                          | BUD21         | YHR203C                 | RPS4B         |
| YNL288W                                          | CAF40         | YHR114W                 | BZZ1          |
| YBR173C                                          | UMP1          | YMR152W                 | YIM1          |
| YNL068C                                          | FKH2          | YLR102C                 | APC9          |
| YBR173C                                          | UMP1          | YMR038C                 | CCS1          |
| YJR140C                                          | HIR3          | YMR038C                 | CCS1          |
| YIR005W                                          | IST3          | YOR308C                 | SNU66         |
| YHL031C                                          | GOS1          | YER122C                 | GLO3          |
| YDR129C                                          | SAC6          | YBL067C                 | UBP13         |
| YOR078W                                          | BUD21         | YGR100W                 | MDR1          |
| YLR090W                                          | XDJ1          | YLR094C                 | GIS3          |
| YHL020C                                          | OPI1          | YGR105W                 | VMA21         |
| YOR112W                                          | CEX1          | YEL051W                 | VMA8          |
| YBR200W                                          | BEM1          | YKR099W                 | BAS1          |
| YLR090W                                          | XDJ1          | YBR108W                 | YBR108W       |
| YLR079W                                          | SIC1          | YDR456W                 | NHX1          |
| YGL078C                                          | DBP3          | YLR094C                 | GIS3          |
| YNL325C                                          | FIG4          | YER139C                 | YER139C       |
| YDR264C                                          | AKR1          | YKL178C                 | STE3          |
| YPL024W                                          | RMI1          | YGR184C                 | UBR1          |
| YGL200C                                          | EMP24         | YCR077C                 | PAT1          |
| YKL139W                                          | CTK1          | YBR171W                 | SEC66         |
| YOR195W                                          | SLK19         | YKL110C                 | KTI12         |

| Predictions at threshold level 0.80 continued... |               |                         |               |
|--------------------------------------------------|---------------|-------------------------|---------------|
| Gene1 of predicted pair                          |               | Gene2 of predicted pair |               |
| Systematic Name                                  | Standard Name | Systematic Name         | Standard Name |
| YDR293C                                          | SSD1          | YLR120C                 | YPS1          |
| YER116C                                          | SLX8          | YBR107C                 | IML3          |
| YNL215W                                          | IES2          | YOR308C                 | SNU66         |
| YNL214W                                          | PEX17         | YGR077C                 | PEX8          |
| YDR293C                                          | SSD1          | YAR014C                 | BUD14         |
| YMR142C                                          | RPL13B        | YMR230W                 | RPS10B        |
| YBR041W                                          | FAT1          | YKR020W                 | VPS51         |
| YDR293C                                          | SSD1          | YGL223C                 | COG1          |
| YLR192C                                          | HCR1          | YBR200W                 | BEM1          |
| YLR095C                                          | IOC2          | YOL111C                 | MDY2          |
| YFR031C-A                                        | RPL2A         | YGR105W                 | VMA21         |
| YEL065W                                          | SIT1          | YPL024W                 | RMI1          |
| YJR056C                                          | YJR056C       | YER139C                 | YER139C       |
| YJR032W                                          | CPR7          | YPL018W                 | CTF19         |
| YBR009C                                          | HHF1          | YJL140W                 | RPB4          |
| YKL139W                                          | CTK1          | YER044C                 | ERG28         |
| YOR178C                                          | GAC1          | YLR258W                 | GSY2          |
| YDR097C                                          | MSH6          | YNL291C                 | MID1          |
| YEL015W                                          | EDC3          | YDR378C                 | LSM6          |
| YEL013W                                          | VAC8          | YGR262C                 | BUD32         |
| YGL133W                                          | ITC1          | YKR048C                 | NAP1          |
| YGR249W                                          | MGA1          | YHR039C-A               | VMA10         |
| YCR077C                                          | PAT1          | YGL031C                 | RPL24A        |
| YML016C                                          | PPZ1          | YJL138C                 | TIF2          |
| YCL037C                                          | SRO9          | YDR153C                 | ENT5          |
| YBL025W                                          | RRN10         | YDL192W                 | ARF1          |
| YNL307C                                          | MCK1          | YDL155W                 | CLB3          |
| YGL066W                                          | SGF73         | YDR507C                 | GIN4          |
| YLR386W                                          | VAC14         | YML016C                 | PPZ1          |

| Predictions at threshold level 0.80 continued... |               |                         |               |
|--------------------------------------------------|---------------|-------------------------|---------------|
| Gene1 of predicted pair                          |               | Gene2 of predicted pair |               |
| Systematic Name                                  | Standard Name | Systematic Name         | Standard Name |
| YER161C                                          | SPT2          | YEL056W                 | HAT2          |
| YHR084W                                          | STE12         | YPL042C                 | SSN3          |
| YDL184C                                          | RPL41A        | YLR452C                 | SST2          |
| YHR161C                                          | YAP1801       | YOR036W                 | PEP12         |
| YEL065W                                          | SIT1          | YIL159W                 | BNR1          |
| YDL020C                                          | RPN4          | YJR090C                 | GRR1          |
| YDL116W                                          | NUP84         | YDR318W                 | MCM21         |
| YLR435W                                          | TSR2          | YGL250W                 | RMR1          |
| YNL106C                                          | INP52         | YPL057C                 | SUR1          |
| YOR109W                                          | INP53         | YHR012W                 | VPS29         |
| YNL106C                                          | INP52         | YLR410W                 | VIP1          |
| YGL124C                                          | MON1          | YBR280C                 | SAF1          |
| YFR031C-A                                        | RPL2A         | YDR207C                 | UME6          |
| YML100W                                          | TSL1          | YMR261C                 | TPS3          |
| YLR109W                                          | AHP1          | YHR111W                 | UBA4          |
| YCR020C-A                                        | MAK31         | YNL069C                 | RPL16B        |
| YEL009C                                          | GCN4          | YKL109W                 | HAP4          |
| YAL010C                                          | MDM10         | YHR111W                 | UBA4          |
| YBL003C                                          | HTA2          | YNL031C                 | HHT2          |
| YNL206C                                          | RTT106        | YBR084C-A               | RPL19A        |
| YPL234C                                          | TFP3          | YAL002W                 | VPS8          |
| YLR234W                                          | TOP3          | YLR150W                 | STM1          |
| YNL215W                                          | IES2          | YCR086W                 | CSM1          |
| YJL124C                                          | LSM1          | YGL003C                 | CDH1          |
| YMR199W                                          | CLN1          | YKL117W                 | SBA1          |
| YDR439W                                          | LRS4          | YNL107W                 | YAF9          |
| YNR072W                                          | HXT17         | YPR030W                 | CSR2          |
| YBR200W                                          | BEM1          | YLR410W                 | VIP1          |
| YOR195W                                          | SLK19         | YML112W                 | CTK3          |

| Predictions at threshold level 0.80 continued... |               |                         |               |
|--------------------------------------------------|---------------|-------------------------|---------------|
| Gene1 of predicted pair                          |               | Gene2 of predicted pair |               |
| Systematic Name                                  | Standard Name | Systematic Name         | Standard Name |
| YNL032W                                          | SIW14         | YEL060C                 | PRB1          |
| YOR375C                                          | GDH1          | YFR036W                 | CDC26         |
| YFL023W                                          | BUD27         | YMR038C                 | CCS1          |
| YDR293C                                          | SSD1          | YDR318W                 | MCM21         |
| YGL066W                                          | SGF73         | YOL148C                 | SPT20         |
| YPR120C                                          | CLB5          | YHL011C                 | PRS3          |
| YGL025C                                          | PGD1          | YDR335W                 | MSN5          |
| YHR178W                                          | STB5          | YGR270W                 | YTA7          |
| YOL145C                                          | CTR9          | YOR106W                 | VAM3          |
| YDR254W                                          | CHL4          | YGR188C                 | BUB1          |
| YML001W                                          | YPT7          | YPL137C                 | GIP3          |
| YIL053W                                          | RHR2          | YLR398C                 | SKI2          |
| YLR381W                                          | CTF3          | YGL151W                 | NUT1          |
| YER116C                                          | SLX8          | YDR484W                 | VPS52         |
| YJL095W                                          | BCK1          | YMR311C                 | GLC8          |
| YML001W                                          | YPT7          | YGL198W                 | YIP4          |
| YJR140C                                          | HIR3          | YGL151W                 | NUT1          |
| YDR156W                                          | RPA14         | YLR315W                 | NKP2          |
| YBL025W                                          | RRN10         | YBR280C                 | SAF1          |
| YHR134W                                          | WSS1          | YBR107C                 | IML3          |
| YHR060W                                          | VMA22         | YER162C                 | RAD4          |
| YNL309W                                          | STB1          | YMR199W                 | CLN1          |
| YDR129C                                          | SAC6          | YKL048C                 | ELM1          |
| YLR102C                                          | APC9          | YBR084C-A               | RPL19A        |
| YNL199C                                          | GCR2          | YER139C                 | YER139C       |
| YNL307C                                          | MCK1          | YJR060W                 | CBF1          |
| YCR020W-B                                        | HTL1          | YHR056C                 | RSC30         |
| YLR090W                                          | XDJ1          | YPL137C                 | GIP3          |
| YBL102W                                          | SFT2          | YMR216C                 | SKY1          |

| Predictions at threshold level 0.80 continued... |               |                         |               |
|--------------------------------------------------|---------------|-------------------------|---------------|
| Gene1 of predicted pair                          |               | Gene2 of predicted pair |               |
| Systematic Name                                  | Standard Name | Systematic Name         | Standard Name |
| YBL008W                                          | HIR1          | YOL081W                 | IRA2          |
| YGL033W                                          | HOP2          | YOL081W                 | IRA2          |
| YGL058W                                          | RAD6          | YHR056C                 | RSC30         |
| YLR381W                                          | CTF3          | YKL101W                 | HSL1          |
| YDL020C                                          | RPN4          | YDR310C                 | SUM1          |
| YNL068C                                          | FKH2          | YKL048C                 | ELM1          |
| YMR224C                                          | MRE11         | YKR035W-A               | DID2          |
| YLR288C                                          | MEC3          | YEL056W                 | HAT2          |
| YKR014C                                          | YPT52         | YER074W-A               | YOS1          |
| YGR135W                                          | PRE9          | YNL107W                 | YAF9          |
| YBR036C                                          | CSG2          | YBR161W                 | CSH1          |
| YKL139W                                          | CTK1          | YLR432W                 | IMD3          |
| YBL078C                                          | ATG8          | YPL195W                 | APL5          |
| YIL159W                                          | BNR1          | YMR214W                 | SCJ1          |
| YJL172W                                          | CPS1          | YHR200W                 | RPN10         |
| YIL002C                                          | INP51         | YJL004C                 | SYS1          |
| YCL001W                                          | RER1          | YML067C                 | ERV41         |
| YBL102W                                          | SFT2          | YDR080W                 | VPS41         |
| YJR135C                                          | MCM22         | YOL067C                 | RTG1          |
| YMR026C                                          | PEX12         | YDR310C                 | SUM1          |
| YGR270W                                          | YTA7          | YOR038C                 | HIR2          |
| YOR080W                                          | DIA2          | YJR005W                 | APL1          |
| YGR105W                                          | VMA21         | YKL041W                 | VPS24         |
| YAL024C                                          | LTE1          | YLR192C                 | HCR1          |
| YGR108W                                          | CLB1          | YDR378C                 | LSM6          |
| YNL076W                                          | MKS1          | YLR180W                 | SAM1          |
| YDR004W                                          | RAD57         | YLR381W                 | CTF3          |
| YLR240W                                          | VPS34         | YOR106W                 | VAM3          |
| YMR026C                                          | PEX12         | YDL184C                 | RPL41A        |



| Predictions at threshold level 0.80 continued... |               |                         |               |
|--------------------------------------------------|---------------|-------------------------|---------------|
| Gene1 of predicted pair                          |               | Gene2 of predicted pair |               |
| Systematic Name                                  | Standard Name | Systematic Name         | Standard Name |
| YNL032W                                          | SIW14         | YJL183W                 | MNN11         |
| YOR080W                                          | DIA2          | YJL058C                 | BIT61         |
| YMR311C                                          | GLC8          | YLR180W                 | SAM1          |
| YGR072W                                          | UPF3          | YLR360W                 | VPS38         |
| YDR253C                                          | MET32         | YML095C                 | RAD10         |
| YMR142C                                          | RPL13B        | YOR066W                 | MSA1          |
| YNL243W                                          | SLA2          | YOR109W                 | INP53         |
| YIL053W                                          | RHR2          | YER144C                 | UBP5          |
| YDR080W                                          | VPS41         | YPL161C                 | BEM4          |
| YNL215W                                          | IES2          | YJL006C                 | CTK2          |
| YHL011C                                          | PRS3          | YLR425W                 | TUS1          |
| YIL159W                                          | BNR1          | YPR030W                 | CSR2          |
| YLR386W                                          | VAC14         | YKR057W                 | RPS21A        |
| YJL136C                                          | RPS21B        | YIL008W                 | URM1          |
| YPR084W                                          | YPR084W       | YNL238W                 | KEX2          |
| YGR249W                                          | MGA1          | YNR072W                 | HXT17         |
| YOR112W                                          | CEX1          | YMR054W                 | STV1          |
| YPL037C                                          | EGD1          | YCL001W                 | RER1          |
| YOR132W                                          | VPS17         | YHL020C                 | OPI1          |
| YLR216C                                          | CPR6          | YLR381W                 | CTF3          |
| YLR234W                                          | TOP3          | YKR095W                 | MLP1          |
| YDR293C                                          | SSD1          | YGR020C                 | VMA7          |
| YGR019W                                          | UGA1          | YLR447C                 | VMA6          |
| YLR371W                                          | ROM2          | YLR180W                 | SAM1          |
| YNL291C                                          | MID1          | YOR132W                 | VPS17         |
| YPL018W                                          | CTF19         | YHL002W                 | HSE1          |
| YGR104C                                          | SRB5          | YBR215W                 | HPC2          |
| YBL102W                                          | SFT2          | YHL020C                 | OPI1          |
| YMR026C                                          | PEX12         | YLR371W                 | ROM2          |

| Predictions at threshold level 0.80 continued... |               |                         |               |
|--------------------------------------------------|---------------|-------------------------|---------------|
| Gene1 of predicted pair                          |               | Gene2 of predicted pair |               |
| Systematic Name                                  | Standard Name | Systematic Name         | Standard Name |
| YMR016C                                          | SOK2          | YDL077C                 | VAM6          |
| YLR441C                                          | RPS1A         | YMR311C                 | GLC8          |
| YML095C                                          | RAD10         | YGL175C                 | SAE2          |
| YLR119W                                          | SRN2          | YNL325C                 | FIG4          |
| YNL106C                                          | INP52         | YCR077C                 | PAT1          |
| YBR131W                                          | CCZ1          | YKR001C                 | VPS1          |
| YMR231W                                          | PEP5          | YML028W                 | TSA1          |
| YCL010C                                          | SGF29         | YBR111W-A               | SUS1          |
| YKR072C                                          | SIS2          | YOL090W                 | MSH2          |
| YHR052W                                          | CIC1          | YOL041C                 | NOP12         |
| YCR081W                                          | SRB8          | YER068W                 | MOT2          |
| YIL076W                                          | SEC28         | YHL020C                 | OPI1          |
| YDR202C                                          | RAV2          | YMR216C                 | SKY1          |
| YNL288W                                          | CAF40         | YBR200W                 | BEM1          |
| YKL048C                                          | ELM1          | YOL081W                 | IRA2          |
| YBR194W                                          | SOY1          | YDR137W                 | RGP1          |
| YFR010W                                          | UBP6          | YMR038C                 | CCS1          |
| YMR127C                                          | SAS2          | YOR038C                 | HIR2          |
| YLL007C                                          | YLL007C       | YNL166C                 | BNI5          |
| YLR381W                                          | CTF3          | YDR289C                 | RTT103        |
| YDR174W                                          | HMO1          | YKL139W                 | CTK1          |
| YLR079W                                          | SIC1          | YOR358W                 | HAP5          |
| YOR038C                                          | HIR2          | YGL151W                 | NUT1          |
| YDL185W                                          | TFP1          | YDR318W                 | MCM21         |
| YPL253C                                          | VIK1          | YDR076W                 | RAD55         |
| YEL065W                                          | SIT1          | YHR200W                 | RPN10         |
| YJL060W                                          | BNA3          | YNL107W                 | YAF9          |
| YGL223C                                          | COG1          | YML012W                 | ERV25         |
| YFR010W                                          | UBP6          | YNL107W                 | YAF9          |

| Predictions at threshold level 0.80 continued... |               |                         |               |
|--------------------------------------------------|---------------|-------------------------|---------------|
| Gene1 of predicted pair                          |               | Gene2 of predicted pair |               |
| Systematic Name                                  | Standard Name | Systematic Name         | Standard Name |
| YBL047C                                          | EDE1          | YOR312C                 | RPL20B        |
| YMR039C                                          | SUB1          | YGL151W                 | NUT1          |
| YOR332W                                          | VMA4          | YKL041W                 | VPS24         |
| YPL161C                                          | BEM4          | YNL127W                 | FAR11         |
| YML115C                                          | VAN1          | YOR312C                 | RPL20B        |
| YKR057W                                          | RPS21A        | YHR200W                 | RPN10         |
| YGL033W                                          | HOP2          | YDR261C                 | EXG2          |
| YDL223C                                          | HBT1          | YOL111C                 | MDY2          |
| YKL007W                                          | CAP1          | YDR309C                 | GIC2          |
| YBR200W                                          | BEM1          | YJL095W                 | BCK1          |
| YML103C                                          | NUP188        | YNL054W                 | VAC7          |
| YNL291C                                          | MID1          | YNL127W                 | FAR11         |
| YDR192C                                          | NUP42         | YDR101C                 | ARX1          |
| YPL024W                                          | RMI1          | YHR077C                 | NMD2          |
| YFR031C-A                                        | RPL2A         | YOR109W                 | INP53         |
| YLR192C                                          | HCR1          | YNL032W                 | SIW14         |
| YNL069C                                          | RPL16B        | YMR216C                 | SKY1          |
| YOL145C                                          | CTR9          | YBR010W                 | HHT1          |
| YIL076W                                          | SEC28         | YDR358W                 | GGA1          |
| YBR131W                                          | CCZ1          | YJL117W                 | PHO86         |
| YDR080W                                          | VPS41         | YKR020W                 | VPS51         |
| YAL024C                                          | LTE1          | YGL161C                 | YIP5          |
| YDR378C                                          | LSM6          | YGR188C                 | BUB1          |
| YLR192C                                          | HCR1          | YNL325C                 | FIG4          |
| YNL325C                                          | FIG4          | YBL103C                 | RTG3          |
| YMR224C                                          | MRE11         | YOR195W                 | SLK19         |
| YBR108W                                          | YBR108W       | YPL137C                 | GIP3          |
| YGR040W                                          | KSS1          | YHR084W                 | STE12         |
| YGL115W                                          | SNF4          | YPR030W                 | CSR2          |

| Predictions at threshold level 0.80 continued... |               |                         |               |
|--------------------------------------------------|---------------|-------------------------|---------------|
| Gene1 of predicted pair                          |               | Gene2 of predicted pair |               |
| Systematic Name                                  | Standard Name | Systematic Name         | Standard Name |
| YEL051W                                          | VMA8          | YOL018C                 | TLG2          |
| YNL041C                                          | COG6          | YER122C                 | GLO3          |
| YER116C                                          | SLX8          | YJR084W                 | CSN12         |
| YDR379W                                          | RGA2          | YKL032C                 | IXR1          |
| YBL058W                                          | SHP1          | YLR306W                 | UBC12         |
| YCR024C-A                                        | PMP1          | YKL117W                 | SBA1          |
| YDR320C                                          | SWA2          | YMR216C                 | SKY1          |
| YOR332W                                          | VMA4          | YHR039C-A               | VMA10         |
| YJL053W                                          | PEP8          | YDR108W                 | GSG1          |
| YKL025C                                          | PAN3          | YHR114W                 | BZZ1          |
| YOR033C                                          | EXO1          | YNL082W                 | PMS1          |
| YBR200W                                          | BEM1          | YBR107C                 | IML3          |
| YMR016C                                          | SOK2          | YKR035W-A               | DID2          |
| YGR108W                                          | CLB1          | YDR318W                 | MCM21         |
| YER122C                                          | GLO3          | YAL002W                 | VPS8          |
| YFR010W                                          | UBP6          | YJR060W                 | CBF1          |
| YOR141C                                          | ARP8          | YDL226C                 | GCS1          |
| YPR120C                                          | CLB5          | YKL101W                 | HSL1          |
| YJR106W                                          | ECM27         | YFL044C                 | OTU1          |
| YIL076W                                          | SEC28         | YJR140C                 | HIR3          |
| YBR131W                                          | CCZ1          | YNL041C                 | COG6          |
| YLR441C                                          | RPS1A         | YKR099W                 | BAS1          |
| YHR134W                                          | WSS1          | YHR012W                 | VPS29         |
| YOR156C                                          | NFI1          | YDR155C                 | CPR1          |
| YHR160C                                          | PEX18         | YDL065C                 | PEX19         |
| YPL106C                                          | SSE1          | YPR046W                 | MCM16         |
| YMR198W                                          | CIK1          | YBR082C                 | UBC4          |
| YNL127W                                          | FAR11         | YER122C                 | GLO3          |
| YFR032C-A                                        | RPL29         | YDL006W                 | PTC1          |

| Predictions at threshold level 0.80 continued... |               |                         |               |
|--------------------------------------------------|---------------|-------------------------|---------------|
| Gene1 of predicted pair                          |               | Gene2 of predicted pair |               |
| Systematic Name                                  | Standard Name | Systematic Name         | Standard Name |
| YOR096W                                          | RPS7A         | YER102W                 | RPS8B         |
| YOR083W                                          | WHI5          | YDR335W                 | MSN5          |
| YNL032W                                          | SIW14         | YML001W                 | YPT7          |
| YPL129W                                          | TAF14         | YMR109W                 | MYO5          |
| YPL024W                                          | RMI1          | YDR318W                 | MCM21         |
| YGL135W                                          | RPL1B         | YBR181C                 | RPS6B         |
| YPL024W                                          | RMI1          | YHR200W                 | RPN10         |
| YBR195C                                          | MSI1          | YCR077C                 | PAT1          |
| YMR026C                                          | PEX12         | YPL137C                 | GIP3          |
| YLR337C                                          | VRP1          | YBL051C                 | PIN4          |
| YJL136C                                          | RPS21B        | YGL163C                 | RAD54         |
| YBL102W                                          | SFT2          | YOR127W                 | RGA1          |
| YML115C                                          | VAN1          | YER162C                 | RAD4          |
| YML103C                                          | NUP188        | YFR030W                 | MET10         |
| YNL166C                                          | BNI5          | YDR289C                 | RTT103        |
| YLR058C                                          | SHM2          | YNL236W                 | SIN4          |
| YJL128C                                          | PBS2          | YER118C                 | SHO1          |
| YLR337C                                          | VRP1          | YBR057C                 | MUM2          |
| YER122C                                          | GLO3          | YLR182W                 | SWI6          |
| YGR072W                                          | UPF3          | YML071C                 | COG8          |
| YDR443C                                          | SSN2          | YNL058C                 | YNL058C       |
| YOR083W                                          | WHI5          | YGL003C                 | CDH1          |
| YKR072C                                          | SIS2          | YJR140C                 | HIR3          |
| YBR041W                                          | FAT1          | YDL006W                 | PTC1          |
| YFR031C-A                                        | RPL2A         | YOL081W                 | IRA2          |
| YDR289C                                          | RTT103        | YOR308C                 | SNU66         |
| YJL172W                                          | CPS1          | YOL111C                 | MDY2          |
| YHR152W                                          | SPO12         | YNL229C                 | URE2          |
| YDL116W                                          | NUP84         | YER110C                 | KAP123        |

| Predictions at threshold level 0.80 continued... |               |                         |               |
|--------------------------------------------------|---------------|-------------------------|---------------|
| Gene1 of predicted pair                          |               | Gene2 of predicted pair |               |
| Systematic Name                                  | Standard Name | Systematic Name         | Standard Name |
| YAL024C                                          | LTE1          | YLR182W                 | SWI6          |
| YPR120C                                          | CLB5          | YJR060W                 | CBF1          |
| YMR231W                                          | PEP5          | YDR076W                 | RAD55         |
| YPL050C                                          | MNN9          | YMR089C                 | YTA12         |
| YNL253W                                          | TEX1          | YNL004W                 | HRB1          |
| YFR032C-A                                        | RPL29         | YGR217W                 | CCH1          |
| YMR055C                                          | BUB2          | YPL106C                 | SSE1          |
| YGL003C                                          | CDH1          | YJR035W                 | RAD26         |
| YML001W                                          | YPT7          | YAL002W                 | VPS8          |
| YDR225W                                          | HTA1          | YLR032W                 | RAD5          |
| YCR020C-A                                        | MAK31         | YJL004C                 | SYS1          |
| YDR137W                                          | RGP1          | YHR081W                 | LRP1          |
| YLR337C                                          | VRP1          | YPL213W                 | LEA1          |
| YCR086W                                          | CSM1          | YGL253W                 | HXK2          |
| YOL030W                                          | GAS5          | YJL187C                 | SWE1          |
| YMR231W                                          | PEP5          | YGL198W                 | YIP4          |
| YDR101C                                          | ARX1          | YOL041C                 | NOP12         |
| YJL176C                                          | SWI3          | YBL101C                 | ECM21         |
| YNL238W                                          | KEX2          | YCR053W                 | THR4          |
| YER107C                                          | GLE2          | YLR055C                 | SPT8          |
| YEL050C                                          | RML2          | YDL226C                 | GCS1          |
| YBR200W                                          | BEM1          | YDR264C                 | AKR1          |
| YJR135C                                          | MCM22         | YGL252C                 | RTG2          |
| YML071C                                          | COG8          | YBR036C                 | CSG2          |
| YLR090W                                          | XDJ1          | YOL111C                 | MDY2          |
| YGR020C                                          | VMA7          | YGL054C                 | ERV14         |
| YJL210W                                          | PEX2          | YDL065C                 | PEX19         |
| YNL238W                                          | KEX2          | YLR398C                 | SKI2          |
| YNL041C                                          | COG6          | YNR032W                 | PPG1          |

| Predictions at threshold level 0.80 continued... |               |                         |               |
|--------------------------------------------------|---------------|-------------------------|---------------|
| Gene1 of predicted pair                          |               | Gene2 of predicted pair |               |
| Systematic Name                                  | Standard Name | Systematic Name         | Standard Name |
| YLR135W                                          | SLX4          | YOL090W                 | MSH2          |
| YOL054W                                          | PSH1          | YOL081W                 | IRA2          |
| YCR053W                                          | THR4          | YDR207C                 | UME6          |
| YMR255W                                          | GFD1          | YBR017C                 | KAP104        |
| YKL048C                                          | ELM1          | YOL111C                 | MDY2          |
| YPR017C                                          | DSS4          | YNR032W                 | PPG1          |
| YOR275C                                          | RIM20         | YIL008W                 | URM1          |
| YPL037C                                          | EGD1          | YDR153C                 | ENT5          |
| YFR031C-A                                        | RPL2A         | YBR171W                 | SEC66         |
| YLR131C                                          | ACE2          | YKL041W                 | VPS24         |
| YCL037C                                          | SRO9          | YOL045W                 | PSK2          |
| YLR441C                                          | RPS1A         | YHR039C-A               | VMA10         |
| YFL023W                                          | BUD27         | YGL175C                 | SAE2          |
| YIL159W                                          | BNR1          | YMR152W                 | YIM1          |
| YPL161C                                          | BEM4          | YLR370C                 | ARC18         |
| YLR360W                                          | VPS38         | YNR032W                 | PPG1          |
| YDR496C                                          | PUF6          | YKL185W                 | ASH1          |
| YJL154C                                          | VPS35         | YJL036W                 | SNX4          |
| YLR079W                                          | SIC1          | YDR289C                 | RTT103        |
| YLR148W                                          | PEP3          | YLR043C                 | TRX1          |
| YMR216C                                          | SKY1          | YJR040W                 | GEF1          |
| YLR095C                                          | IOC2          | YHR039C-A               | VMA10         |
| YOR270C                                          | VPH1          | YNL058C                 | YNL058C       |
| YER162C                                          | RAD4          | YOR035C                 | SHE4          |
| YBL027W                                          | RPL19B        | YER096W                 | SHC1          |
| YBR200W                                          | BEM1          | YDR207C                 | UME6          |
| YBR194W                                          | SOY1          | YML028W                 | TSA1          |
| YNR052C                                          | POP2          | YNL016W                 | PUB1          |
| YDR225W                                          | HTA1          | YPL057C                 | SUR1          |

| Predictions at threshold level 0.80 continued... |               |                         |               |
|--------------------------------------------------|---------------|-------------------------|---------------|
| Gene1 of predicted pair                          |               | Gene2 of predicted pair |               |
| Systematic Name                                  | Standard Name | Systematic Name         | Standard Name |
| YKR020W                                          | VPS51         | YDR323C                 | PEP7          |
| YOR038C                                          | HIR2          | YDR310C                 | SUM1          |
| YNL288W                                          | CAF40         | YBR171W                 | SEC66         |
| YOR043W                                          | WHI2          | YEL060C                 | PRB1          |
| YBR200W                                          | BEM1          | YOL081W                 | IRA2          |
| YPR030W                                          | CSR2          | YER040W                 | GLN3          |
| YLR447C                                          | VMA6          | YGL124C                 | MON1          |
| YHR156C                                          | LIN1          | YML071C                 | COG8          |
| YLR441C                                          | RPS1A         | YNR072W                 | HXT17         |
| YJL151C                                          | SNA3          | YGR268C                 | HUA1          |
| YPL105C                                          | YPL105C       | YDL006W                 | PTC1          |
| YLR370C                                          | ARC18         | YJR035W                 | RAD26         |
| YPL115C                                          | BEM3          | YMR172W                 | HOT1          |
| YHR012W                                          | VPS29         | YDR153C                 | ENT5          |
| YDL002C                                          | NHP10         | YDR440W                 | DOT1          |
| YDR137W                                          | RGP1          | YNL041C                 | COG6          |
| YER161C                                          | SPT2          | YER139C                 | YER139C       |
| YBR171W                                          | SEC66         | YHR012W                 | VPS29         |
| YER116C                                          | SLX8          | YNL058C                 | YNL058C       |
| YDL005C                                          | MED2          | YNL079C                 | TPM1          |
| YDR335W                                          | MSN5          | YHR167W                 | THP2          |
| YDR142C                                          | PEX7          | YNL214W                 | PEX17         |
| YMR016C                                          | SOK2          | YOR327C                 | SNC2          |
| YNL314W                                          | DAL82         | YIR023W                 | DAL81         |
| YBL008W                                          | HIR1          | YGL148W                 | ARO2          |
| YLR386W                                          | VAC14         | YKL032C                 | IXR1          |
| YOR001W                                          | RRP6          | YDR378C                 | LSM6          |
| YKR020W                                          | VPS51         | YDL192W                 | ARF1          |
| YGL135W                                          | RPL1B         | YML097C                 | VPS9          |



| Predictions at threshold level 0.80 continued... |               |                         |               |
|--------------------------------------------------|---------------|-------------------------|---------------|
| Gene1 of predicted pair                          |               | Gene2 of predicted pair |               |
| Systematic Name                                  | Standard Name | Systematic Name         | Standard Name |
| YBR126C                                          | TPS1          | YHR156C                 | LIN1          |
| YPR084W                                          | YPR084W       | YML001W                 | YPT7          |
| YOR275C                                          | RIM20         | YBR283C                 | SSH1          |
| YER110C                                          | KAP123        | YJR135C                 | MCM22         |
| YKL160W                                          | ELF1          | YOR308C                 | SNU66         |
| YHR178W                                          | STB5          | YGR188C                 | BUB1          |
| YDR156W                                          | RPA14         | YLR079W                 | SIC1          |
| YAL020C                                          | ATS1          | YBL051C                 | PIN4          |
| YLR381W                                          | CTF3          | YFR030W                 | MET10         |
| YEL065W                                          | SIT1          | YHR013C                 | ARD1          |
| YIL053W                                          | RHR2          | YDR358W                 | GGA1          |
| YMR026C                                          | PEX12         | YDL192W                 | ARF1          |
| YAL024C                                          | LTE1          | YLR180W                 | SAM1          |
| YMR224C                                          | MRE11         | YJL095W                 | BCK1          |
| YNL243W                                          | SLA2          | YBR200W                 | BEM1          |
| YLR337C                                          | VRP1          | YPL253C                 | VIK1          |
| YMR080C                                          | NAM7          | YLR135W                 | SLX4          |
| YDR261C                                          | EXG2          | YER139C                 | YER139C       |
| YBR041W                                          | FAT1          | YGR135W                 | PRE9          |
| YPL180W                                          | TCO89         | YLR398C                 | SKI2          |
| YOR076C                                          | SKI7          | YOR191W                 | RIS1          |
| YMR179W                                          | SPT21         | YGR188C                 | BUB1          |
| YJR060W                                          | CBF1          | YOL108C                 | INO4          |
| YDR137W                                          | RGP1          | YNL297C                 | MON2          |
| YDR358W                                          | GGA1          | YAL055W                 | PEX22         |
| YHR111W                                          | UBA4          | YGL124C                 | MON1          |
| YDR108W                                          | GSG1          | YOR109W                 | INP53         |
| YPL001W                                          | HAT1          | YMR055C                 | BUB2          |
| YNL041C                                          | COG6          | YMR214W                 | SCJ1          |

| Predictions at threshold level 0.80 continued... |               |                         |               |
|--------------------------------------------------|---------------|-------------------------|---------------|
| Gene1 of predicted pair                          |               | Gene2 of predicted pair |               |
| Systematic Name                                  | Standard Name | Systematic Name         | Standard Name |
| YOR106W                                          | VAM3          | YPR051W                 | MAK3          |
| YPL057C                                          | SUR1          | YML001W                 | YPT7          |
| YAL024C                                          | LTE1          | YHR111W                 | UBA4          |
| YPR084W                                          | YPR084W       | YJL154C                 | VPS35         |
| YJR040W                                          | GEF1          | YEL053C                 | MAK10         |
| YDR439W                                          | LRS4          | YPL152W                 | RRD2          |
| YLR386W                                          | VAC14         | YGL151W                 | NUT1          |
| YNL297C                                          | MON2          | YOR109W                 | INP53         |
| YOR039W                                          | CKB2          | YNL206C                 | RTT106        |
| YPL106C                                          | SSE1          | YDL047W                 | SIT4          |
| YGR072W                                          | UPF3          | YKR001C                 | VPS1          |
| YMR216C                                          | SKY1          | YPL037C                 | EGD1          |
| YNL058C                                          | YNL058C       | YMR152W                 | YIM1          |
| YKL160W                                          | ELF1          | YLR410W                 | VIP1          |
| YML001W                                          | YPT7          | YJR033C                 | RAV1          |
| YBR084C-A                                        | RPL19A        | YJL095W                 | BCK1          |
| YNL243W                                          | SLA2          | YLR330W                 | CHS5          |
| YJR059W                                          | PTK2          | YER110C                 | KAP123        |
| YOR290C                                          | SNF2          | YDR469W                 | SDC1          |
| YPR017C                                          | DSS4          | YEL043W                 | YEL043W       |
| YLR090W                                          | XDJ1          | YKL126W                 | YPK1          |
| YOR080W                                          | DIA2          | YDR318W                 | MCM21         |
| YBL008W                                          | HIR1          | YPR120C                 | CLB5          |
| YBR171W                                          | SEC66         | YCR053W                 | THR4          |
| YER120W                                          | SCS2          | YPR032W                 | SRO7          |
| YLR102C                                          | APC9          | YGL031C                 | RPL24A        |
| YKL025C                                          | PAN3          | YML016C                 | PPZ1          |
| YIL076W                                          | SEC28         | YPL161C                 | BEM4          |
| YBR215W                                          | HPC2          | YMR055C                 | BUB2          |

| Predictions at threshold level 0.80 continued... |               |                         |               |
|--------------------------------------------------|---------------|-------------------------|---------------|
| Gene1 of predicted pair                          |               | Gene2 of predicted pair |               |
| Systematic Name                                  | Standard Name | Systematic Name         | Standard Name |
| YNL297C                                          | MON2          | YPL234C                 | TFP3          |
| YDR477W                                          | SNF1          | YML071C                 | COG8          |
| YLR315W                                          | NKP2          | YLR350W                 | ORM2          |
| YDL013W                                          | SLX5          | YGL031C                 | RPL24A        |
| YPL042C                                          | SSN3          | YMR037C                 | MSN2          |
| YHR060W                                          | VMA22         | YBR280C                 | SAF1          |
| YMR092C                                          | AIP1          | YDR389W                 | SAC7          |
| YLR083C                                          | EMP70         | YPR051W                 | MAK3          |
| YBR171W                                          | SEC66         | YHR114W                 | BZZ1          |
| YMR202W                                          | ERG2          | YJL095W                 | BCK1          |
| YMR199W                                          | CLN1          | YBL047C                 | EDE1          |
| YOR191W                                          | RIS1          | YOR243C                 | PUS7          |
| YGL175C                                          | SAE2          | YML028W                 | TSA1          |
| YEL043W                                          | YEL043W       | YOR327C                 | SNC2          |
| YDL059C                                          | RAD59         | YGL175C                 | SAE2          |
| YOR127W                                          | RGA1          | YPR051W                 | MAK3          |
| YAL024C                                          | LTE1          | YFR030W                 | MET10         |
| YML095C                                          | RAD10         | YBR084C-A               | RPL19A        |
| YBR290W                                          | BSD2          | YMR273C                 | ZDS1          |
| YDR076W                                          | RAD55         | YJR035W                 | RAD26         |
| YFL023W                                          | BUD27         | YEL053C                 | MAK10         |
| YNL069C                                          | RPL16B        | YDL077C                 | VAM6          |
| YDR245W                                          | MNN10         | YJL006C                 | CTK2          |
| YGL087C                                          | MMS2          | YLR381W                 | CTF3          |
| YKR099W                                          | BAS1          | YLR093C                 | NYV1          |
| YBR127C                                          | VMA2          | YNL238W                 | KEX2          |
| YPL042C                                          | SSN3          | YGR252W                 | GCN5          |
| YBL058W                                          | SHP1          | YHR081W                 | LRP1          |
| YML095C                                          | RAD10         | YMR201C                 | RAD14         |

| Predictions at threshold level 0.80 continued... |               |                         |               |
|--------------------------------------------------|---------------|-------------------------|---------------|
| Gene1 of predicted pair                          |               | Gene2 of predicted pair |               |
| Systematic Name                                  | Standard Name | Systematic Name         | Standard Name |
| YPL195W                                          | APL5          | YMR230W                 | RPS10B        |
| YMR224C                                          | MRE11         | YMR214W                 | SCJ1          |
| YJR056C                                          | YJR056C       | YML001W                 | YPT7          |
| YDR108W                                          | GSG1          | YJR060W                 | CBF1          |
| YMR199W                                          | CLN1          | YFL023W                 | BUD27         |
| YGL066W                                          | SGF73         | YPR046W                 | MCM16         |
| YGR239C                                          | PEX21         | YNL214W                 | PEX17         |
| YOR132W                                          | VPS17         | YER122C                 | GLO3          |
| YBL088C                                          | TEL1          | YML095C                 | RAD10         |
| YLR083C                                          | EMP70         | YJR060W                 | CBF1          |
| YJL095W                                          | BCK1          | YDL077C                 | VAM6          |
| YMR095C                                          | SNO1          | YMR230W                 | RPS10B        |
| YBR010W                                          | HHT1          | YLR357W                 | RSC2          |
| YGR104C                                          | SRB5          | YGR270W                 | YTA7          |
| YJL154C                                          | VPS35         | YCL037C                 | SRO9          |
| YMR224C                                          | MRE11         | YML062C                 | MFT1          |
| YDL002C                                          | NHP10         | YOR213C                 | SAS5          |
| YGL054C                                          | ERV14         | YHR012W                 | VPS29         |
| YJR140C                                          | HIR3          | YPL057C                 | SUR1          |
| YDR260C                                          | SWM1          | YCR086W                 | CSM1          |
| YER096W                                          | SHC1          | YOR014W                 | RTS1          |
| YDL161W                                          | ENT1          | YCR088W                 | ABP1          |
| YPR030W                                          | CSR2          | YDR207C                 | UME6          |
| YDR383C                                          | NKP1          | YMR224C                 | MRE11         |
| YDR137W                                          | RGP1          | YJL183W                 | MNN11         |
| YJL006C                                          | CTK2          | YNL079C                 | TPM1          |
| YNL069C                                          | RPL16B        | YHR012W                 | VPS29         |
| YJL124C                                          | LSM1          | YOR141C                 | ARP8          |
| YDR507C                                          | GIN4          | YHR200W                 | RPN10         |

| Predictions at threshold level 0.80 continued... |               |                         |               |
|--------------------------------------------------|---------------|-------------------------|---------------|
| Gene1 of predicted pair                          |               | Gene2 of predicted pair |               |
| Systematic Name                                  | Standard Name | Systematic Name         | Standard Name |
| YDL116W                                          | NUP84         | YGL175C                 | SAE2          |
| YOR358W                                          | HAP5          | YKL109W                 | HAP4          |
| YKR001C                                          | VPS1          | YDL192W                 | ARF1          |
| YLR095C                                          | IOC2          | YBR171W                 | SEC66         |
| YBR019C                                          | GAL10         | YBR280C                 | SAF1          |
| YDL020C                                          | RPN4          | YML095C                 | RAD10         |
| YEL065W                                          | SIT1          | YLR095C                 | IOC2          |
| YJR032W                                          | CPR7          | YMR152W                 | YIM1          |
| YDL101C                                          | DUN1          | YGL175C                 | SAE2          |
| YEL065W                                          | SIT1          | YML001W                 | YPT7          |
| YHR157W                                          | REC104        | YJR021C                 | REC107        |
| YIL002C                                          | INP51         | YPR173C                 | VPS4          |
| YML115C                                          | VAN1          | YBL025W                 | RRN10         |
| YPL024W                                          | RMI1          | YLR320W                 | MMS22         |
| YMR153W                                          | NUP53         | YKL117W                 | SBA1          |
| YML001W                                          | YPT7          | YMR231W                 | PEP5          |
| YDR174W                                          | HMO1          | YBR200W                 | BEM1          |
| YML095C                                          | RAD10         | YPL161C                 | BEM4          |
| YEL044W                                          | IES6          | YPL050C                 | MNN9          |
| YPR084W                                          | YPR084W       | YMR054W                 | STV1          |
| YKL160W                                          | ELF1          | YNL107W                 | YAF9          |
| YMR026C                                          | PEX12         | YBR173C                 | UMP1          |
| YPL240C                                          | HSP82         | YPR118W                 | MRI1          |
| YDR477W                                          | SNF1          | YNL199C                 | GCR2          |
| YGL066W                                          | SGF73         | YLR032W                 | RAD5          |
| YGR133W                                          | PEX4          | YML097C                 | VPS9          |
| YLR083C                                          | EMP70         | YDR153C                 | ENT5          |
| YJL006C                                          | CTK2          | YFR036W                 | CDC26         |
| YJR032W                                          | CPR7          | YMR311C                 | GLC8          |

| Predictions at threshold level 0.80 continued... |               |                         |               |
|--------------------------------------------------|---------------|-------------------------|---------------|
| Gene1 of predicted pair                          |               | Gene2 of predicted pair |               |
| Systematic Name                                  | Standard Name | Systematic Name         | Standard Name |
| YER116C                                          | SLX8          | YGL003C                 | CDH1          |
| YFR031C-A                                        | RPL2A         | YNL058C                 | YNL058C       |
| YGL066W                                          | SGF73         | YOR014W                 | RTS1          |
| YHR115C                                          | DMA1          | YGL031C                 | RPL24A        |
| YNL058C                                          | YNL058C       | YJR084W                 | CSN12         |
| YDL020C                                          | RPN4          | YGL253W                 | HXK2          |
| YBR107C                                          | IML3          | YGL163C                 | RAD54         |
| YNL291C                                          | MID1          | YDL077C                 | VAM6          |
| YLR234W                                          | TOP3          | YDL059C                 | RAD59         |
| YLL039C                                          | UBI4          | YER143W                 | DDI1          |
| YJR140C                                          | HIR3          | YPL001W                 | HAT1          |
| YMR224C                                          | MRE11         | YGL031C                 | RPL24A        |
| YGL033W                                          | HOP2          | YFL023W                 | BUD27         |
| YBL047C                                          | EDE1          | YLR425W                 | TUS1          |
| YDR108W                                          | GSG1          | YOR308C                 | SNU66         |
| YER179W                                          | DMC1          | YPL121C                 | MEI5          |
| YER116C                                          | SLX8          | YBR073W                 | RDH54         |
| YJL095W                                          | BCK1          | YKL161C                 | YKL161C       |
| YOR038C                                          | HIR2          | YOR308C                 | SNU66         |
| YPL037C                                          | EGD1          | YAR014C                 | BUD14         |
| YJR135C                                          | MCM22         | YOL091W                 | SPO21         |
| YER110C                                          | KAP123        | YJR032W                 | CPR7          |
| YOR083W                                          | WHI5          | YJR035W                 | RAD26         |
| YHR081W                                          | LRP1          | YGL124C                 | MON1          |
| YDR245W                                          | MNN10         | YKR020W                 | VPS51         |
| YBR107C                                          | IML3          | YDR260C                 | SWM1          |
| YOR033C                                          | EXO1          | YML062C                 | MFT1          |
| YCR066W                                          | RAD18         | YKL114C                 | APN1          |
| YNL238W                                          | KEX2          | YER122C                 | GLO3          |

| Predictions at threshold level 0.80 continued... |               |                         |               |
|--------------------------------------------------|---------------|-------------------------|---------------|
| Gene1 of predicted pair                          |               | Gene2 of predicted pair |               |
| Systematic Name                                  | Standard Name | Systematic Name         | Standard Name |
| YGL147C                                          | RPL9A         | YPL024W                 | RMI1          |
| YLR360W                                          | VPS38         | YDL161W                 | ENT1          |
| YNL031C                                          | HHT2          | YJR063W                 | RPA12         |
| YJL128C                                          | PBS2          | YCR073C                 | SSK22         |
| YDR176W                                          | NGG1          | YKL139W                 | CTK1          |
| YMR054W                                          | STV1          | YJR032W                 | CPR7          |
| YAL024C                                          | LTE1          | YGL212W                 | VAM7          |
| YLR083C                                          | EMP70         | YPL195W                 | APL5          |
| YGL060W                                          | YBP2          | YMR202W                 | ERG2          |
| YKL139W                                          | CTK1          | YLR306W                 | UBC12         |
| YPL105C                                          | YPL105C       | YML038C                 | YMD8          |
| YPR051W                                          | MAK3          | YPR032W                 | SRO7          |
| YHR111W                                          | UBA4          | YBR114W                 | RAD16         |
| YKR020W                                          | VPS51         | YGL054C                 | ERV14         |
| YJL036W                                          | SNX4          | YPL195W                 | APL5          |
| YPR040W                                          | TIP41         | YDL047W                 | SIT4          |
| YKR072C                                          | SIS2          | YCR077C                 | PAT1          |
| YNL051W                                          | COG5          | YPR032W                 | SRO7          |
| YPL096C-A                                        | ERI1          | YGR135W                 | PRE9          |
| YGL212W                                          | VAM7          | YOL121C                 | RPS19A        |
| YLR192C                                          | HCR1          | YJL095W                 | BCK1          |
| YPR017C                                          | DSS4          | YNL291C                 | MID1          |
| YPR017C                                          | DSS4          | YGR105W                 | VMA21         |
| YLR018C                                          | POM34         | YNL199C                 | GCR2          |
| YDR146C                                          | SWI5          | YOR275C                 | RIM20         |
| YAR014C                                          | BUD14         | YLR182W                 | SWI6          |
| YMR142C                                          | RPL13B        | YNR072W                 | HXT17         |
| YKL139W                                          | CTK1          | YGL124C                 | MON1          |
| YOR312C                                          | RPL20B        | YLR182W                 | SWI6          |

| Predictions at threshold level 0.80 continued... |               |                         |               |
|--------------------------------------------------|---------------|-------------------------|---------------|
| Gene1 of predicted pair                          |               | Gene2 of predicted pair |               |
| Systematic Name                                  | Standard Name | Systematic Name         | Standard Name |
| YIL159W                                          | BNR1          | YNR072W                 | HXT17         |
| YHR178W                                          | STB5          | YDL155W                 | CLB3          |
| YHR200W                                          | RPN10         | YML071C                 | COG8          |
| YDL160C                                          | DHH1          | YML058W                 | SML1          |
| YLR410W                                          | VIP1          | YJR035W                 | RAD26         |
| YGL212W                                          | VAM7          | YJR040W                 | GEF1          |
| YPR051W                                          | MAK3          | YBR114W                 | RAD16         |
| YGL237C                                          | HAP2          | YKL048C                 | ELM1          |
| YPL024W                                          | RMI1          | YKL048C                 | ELM1          |
| YMR224C                                          | MRE11         | YDR310C                 | SUM1          |
| YKR020W                                          | VPS51         | YPL089C                 | RLM1          |
| YKL126W                                          | YPK1          | YLR371W                 | ROM2          |
| YMR133W                                          | REC114        | YPR030W                 | CSR2          |
| YHR052W                                          | CIC1          | YDR312W                 | SSF2          |
| YEL053C                                          | MAK10         | YER040W                 | GLN3          |
| YPL024W                                          | RMI1          | YLR094C                 | GIS3          |
| YJR056C                                          | YJR056C       | YLR320W                 | MMS22         |
| YDR137W                                          | RGP1          | YDL083C                 | RPS16B        |
| YNL218W                                          | MGS1          | YBL079W                 | NUP170        |
| YKL048C                                          | ELM1          | YFR030W                 | MET10         |
| YAL024C                                          | LTE1          | YKR035W-A               | DID2          |
| YIL053W                                          | RHR2          | YGL147C                 | RPL9A         |
| YDR202C                                          | RAV2          | YEL053C                 | MAK10         |
| YBR290W                                          | BSD2          | YIL156W                 | UBP7          |
| YDR254W                                          | CHL4          | YJR063W                 | RPA12         |
| YLR079W                                          | SIC1          | YLR254C                 | NDL1          |
| YMR216C                                          | SKY1          | YDR153C                 | ENT5          |
| YNL229C                                          | URE2          | YER040W                 | GLN3          |
| YLR095C                                          | IOC2          | YER044C                 | ERG28         |



| Predictions at threshold level 0.80 continued... |               |                         |               |
|--------------------------------------------------|---------------|-------------------------|---------------|
| Gene1 of predicted pair                          |               | Gene2 of predicted pair |               |
| Systematic Name                                  | Standard Name | Systematic Name         | Standard Name |
| YDL216C                                          | RRI1          | YOL117W                 | RRI2          |
| YDR392W                                          | SPT3          | YBR111W-A               | SUS1          |
| YFR010W                                          | UBP6          | YDR318W                 | MCM21         |
| YGR184C                                          | UBR1          | YNL307C                 | MCK1          |
| YMR127C                                          | SAS2          | YBR107C                 | IML3          |
| YKL139W                                          | CTK1          | YOL111C                 | MDY2          |
| YNR049C                                          | MSO1          | YPR032W                 | SRO7          |
| YDL020C                                          | RPN4          | YPL018W                 | CTF19         |
| YKR035W-A                                        | DID2          | YJL095W                 | BCK1          |
| YJL154C                                          | VPS35         | YDL161W                 | ENT1          |
| YLR337C                                          | VRP1          | YHR200W                 | RPN10         |
| YIL103W                                          | DPH1          | YCR086W                 | CSM1          |
| YOR358W                                          | HAP5          | YGR188C                 | BUB1          |
| YDR378C                                          | LSM6          | YPR046W                 | MCM16         |
| YFR010W                                          | UBP6          | YPL037C                 | EGD1          |
| YOR026W                                          | BUB3          | YHR205W                 | SCH9          |
| YKL048C                                          | ELM1          | YDL194W                 | SNF3          |
| YNL025C                                          | SSN8          | YJL124C                 | LSM1          |
| YGR270W                                          | YTA7          | YHR167W                 | THP2          |
| YAL024C                                          | LTE1          | YER144C                 | UBP5          |
| YAL015C                                          | NTG1          | YKL114C                 | APN1          |
| YDR245W                                          | MNN10         | YBR215W                 | HPC2          |
| YOR337W                                          | TEA1          | YMR139W                 | RIM11         |
| YLR288C                                          | MEC3          | YOR368W                 | RAD17         |
| YNL087W                                          | TCB2          | YOR043W                 | WHI2          |
| YBR194W                                          | SOY1          | YJR060W                 | CBF1          |
| YML001W                                          | YPT7          | YLR371W                 | ROM2          |
| YNL218W                                          | MGS1          | YOR243C                 | PUS7          |
| YDR329C                                          | PEX3          | YJL210W                 | PEX2          |

| Predictions at threshold level 0.80 continued... |               |                         |               |
|--------------------------------------------------|---------------|-------------------------|---------------|
| Gene1 of predicted pair                          |               | Gene2 of predicted pair |               |
| Systematic Name                                  | Standard Name | Systematic Name         | Standard Name |
| YOL062C                                          | APM4          | YPL259C                 | APM1          |
| YJR059W                                          | PTK2          | YGR059W                 | SPR3          |
| YLR181C                                          | VTA1          | YPR173C                 | VPS4          |
| YJL060W                                          | BNA3          | YML095C                 | RAD10         |
| YMR199W                                          | CLN1          | YGR135W                 | PRE9          |
| YLR337C                                          | VRP1          | YLR447C                 | VMA6          |
| YDR507C                                          | GIN4          | YGL208W                 | SIP2          |
| YAL024C                                          | LTE1          | YER139C                 | YER139C       |
| YOR083W                                          | WHI5          | YMR198W                 | CIK1          |
| YDR245W                                          | MNN10         | YEL013W                 | VAC8          |
| YGR072W                                          | UPF3          | YMR054W                 | STV1          |
| YGR104C                                          | SRB5          | YBL075C                 | SSA3          |
| YKR020W                                          | VPS51         | YOL018C                 | TLG2          |
| YAL024C                                          | LTE1          | YHR039C-A               | VMA10         |
| YPR036W                                          | VMA13         | YNR072W                 | HXT17         |
| YNL032W                                          | SIW14         | YGL115W                 | SNF4          |
| YNR023W                                          | SNF12         | YER161C                 | SPT2          |
| YAL024C                                          | LTE1          | YDL223C                 | HBT1          |
| YOR112W                                          | CEX1          | YMR216C                 | SKY1          |
| YHL031C                                          | GOS1          | YOR036W                 | PEP12         |
| YLR234W                                          | TOP3          | YJR135C                 | MCM22         |
| YDR363W-A                                        | SEM1          | YDR469W                 | SDC1          |
| YBL058W                                          | SHP1          | YJL095W                 | BCK1          |
| YHR052W                                          | CIC1          | YKR057W                 | RPS21A        |
| YOR106W                                          | VAM3          | YER042W                 | MXR1          |
| YMR224C                                          | MRE11         | YGR081C                 | SLX9          |
| YER116C                                          | SLX8          | YLR398C                 | SKI2          |
| YKL006W                                          | RPL14A        | YJL006C                 | CTK2          |
| YDL077C                                          | VAM6          | YNR032W                 | PPG1          |

| Predictions at threshold level 0.80 continued... |               |                         |               |
|--------------------------------------------------|---------------|-------------------------|---------------|
| Gene1 of predicted pair                          |               | Gene2 of predicted pair |               |
| Systematic Name                                  | Standard Name | Systematic Name         | Standard Name |
| YBR200W                                          | BEM1          | YKL129C                 | MYO3          |
| YMR127C                                          | SAS2          | YHR111W                 | UBA4          |
| YNL288W                                          | CAF40         | YOL067C                 | RTG1          |
| YDR477W                                          | SNF1          | YBR217W                 | ATG12         |
| YPL240C                                          | HSP82         | YER105C                 | NUP157        |
| YAL051W                                          | OAF1          | YMR198W                 | CIK1          |
| YHR178W                                          | STB5          | YOL067C                 | RTG1          |
| YEL050C                                          | RML2          | YOR001W                 | RRP6          |
| YHR079C                                          | IRE1          | YGL223C                 | COG1          |
| YMR172W                                          | HOT1          | YJL154C                 | VPS35         |
| YNL054W                                          | VAC7          | YNL116W                 | DMA2          |
| YJL053W                                          | PEP8          | YDR310C                 | SUM1          |
| YHR081W                                          | LRP1          | YBR019C                 | GAL10         |
| YPR131C                                          | NAT3          | YJR005W                 | APL1          |
| YMR224C                                          | MRE11         | YHR156C                 | LIN1          |
| YDR440W                                          | DOT1          | YEL013W                 | VAC8          |
| YOR290C                                          | SNF2          | YOR064C                 | YNG1          |
| YML058W                                          | SML1          | YGL115W                 | SNF4          |
| YFR031C-A                                        | RPL2A         | YNR032W                 | PPG1          |
| YBR126C                                          | TPS1          | YFL033C                 | RIM15         |
| YJL036W                                          | SNX4          | YMR054W                 | STV1          |
| YDL020C                                          | RPN4          | YHR012W                 | VPS29         |
| YNL243W                                          | SLA2          | YNL153C                 | GIM3          |
| YBR215W                                          | HPC2          | YPL256C                 | CLN2          |
| YGL178W                                          | MPT5          | YLR418C                 | CDC73         |
| YNR052C                                          | POP2          | YJL164C                 | TPK1          |
| YPR052C                                          | NHP6A         | YDL160C                 | DHH1          |
| YDR477W                                          | SNF1          | YCR053W                 | THR4          |
| YOL090W                                          | MSH2          | YNL076W                 | MKS1          |

| Predictions at threshold level 0.80 continued... |               |                         |               |
|--------------------------------------------------|---------------|-------------------------|---------------|
| Gene1 of predicted pair                          |               | Gene2 of predicted pair |               |
| Systematic Name                                  | Standard Name | Systematic Name         | Standard Name |
| YHL031C                                          | GOS1          | YCL037C                 | SRO9          |
| YMR039C                                          | SUB1          | YML016C                 | PPZ1          |
| YLR094C                                          | GIS3          | YBL025W                 | RRN10         |
| YKL032C                                          | IXR1          | YDR264C                 | AKR1          |
| YMR016C                                          | SOK2          | YNL076W                 | MKS1          |
| YMR198W                                          | CIK1          | YGR133W                 | PEX4          |
| YKR001C                                          | VPS1          | YER120W                 | SCS2          |
| YHR081W                                          | LRP1          | YPL195W                 | APL5          |
| YBR107C                                          | IML3          | YJL095W                 | BCK1          |
| YDR202C                                          | RAV2          | YNL127W                 | FAR11         |
| YLR386W                                          | VAC14         | YPR030W                 | CSR2          |
| YJL095W                                          | BCK1          | YEL036C                 | ANP1          |
| YAL024C                                          | LTE1          | YKL139W                 | CTK1          |
| YNL107W                                          | YAF9          | YNL225C                 | CNM67         |
| YJL006C                                          | CTK2          | YNL107W                 | YAF9          |
| YOR195W                                          | SLK19         | YDR207C                 | UME6          |
| YPR084W                                          | YPR084W       | YPL195W                 | APL5          |
| YNL264C                                          | PDR17         | YGR014W                 | MSB2          |
| YOR127W                                          | RGA1          | YML071C                 | COG8          |
| YIR003W                                          | YIR003W       | YDR245W                 | MNN10         |
| YPR036W                                          | VMA13         | YCR053W                 | THR4          |
| YFR010W                                          | UBP6          | YMR016C                 | SOK2          |
| YMR172W                                          | HOT1          | YGL253W                 | HXK2          |
| YLR079W                                          | SIC1          | YMR164C                 | MSS11         |
| YOR033C                                          | EXO1          | YLR234W                 | TOP3          |
| YPL115C                                          | BEM3          | YOR127W                 | RGA1          |
| YDR261C                                          | EXG2          | YMR214W                 | SCJ1          |
| YNR072W                                          | HXT17         | YHR081W                 | LRP1          |
| YMR116C                                          | ASC1          | YLR410W                 | VIP1          |

| Predictions at threshold level 0.80 continued... |               |                         |               |
|--------------------------------------------------|---------------|-------------------------|---------------|
| Gene1 of predicted pair                          |               | Gene2 of predicted pair |               |
| Systematic Name                                  | Standard Name | Systematic Name         | Standard Name |
| YLR093C                                          | NYV1          | YDR207C                 | UME6          |
| YFR036W                                          | CDC26         | YNL225C                 | CNM67         |
| YNL297C                                          | MON2          | YEL053C                 | MAK10         |
| YBL102W                                          | SFT2          | YER162C                 | RAD4          |
| YFL023W                                          | BUD27         | YML102W                 | CAC2          |
| YCR088W                                          | ABP1          | YPL045W                 | VPS16         |
| YMR054W                                          | STV1          | YOL108C                 | INO4          |
| YGL246C                                          | RAI1          | YIL133C                 | RPL16A        |
| YBL071W-A                                        | KTI11         | YOL121C                 | RPS19A        |
| YPR171W                                          | BSP1          | YMR109W                 | MYO5          |
| YDR245W                                          | MNN10         | YDL002C                 | NHP10         |
| YLR425W                                          | TUS1          | YDR207C                 | UME6          |
| YLR452C                                          | SST2          | YJR032W                 | CPR7          |
| YBR171W                                          | SEC66         | YBR019C                 | GAL10         |
| YOR290C                                          | SNF2          | YLR180W                 | SAM1          |
| YBR171W                                          | SEC66         | YDR358W                 | GGA1          |
| YDR137W                                          | RGP1          | YAL002W                 | VPS8          |
| YIL053W                                          | RHR2          | YGL078C                 | DBP3          |
| YHR060W                                          | VMA22         | YER139C                 | YER139C       |
| YML115C                                          | VAN1          | YLR094C                 | GIS3          |
| YDR448W                                          | ADA2          | YBL002W                 | HTB2          |
| YML115C                                          | VAN1          | YER144C                 | UBP5          |
| YJR063W                                          | RPA12         | YDR318W                 | MCM21         |
| YOR083W                                          | WHI5          | YBR107C                 | IML3          |
| YDR254W                                          | CHL4          | YLR429W                 | CRN1          |
| YDR129C                                          | SAC6          | YJR032W                 | CPR7          |
| YKR020W                                          | VPS51         | YER120W                 | SCS2          |
| YNL218W                                          | MGS1          | YOR191W                 | RIS1          |
| YDR207C                                          | UME6          | YKR030W                 | GMH1          |

| Predictions at threshold level 0.80 continued... |               |                         |               |
|--------------------------------------------------|---------------|-------------------------|---------------|
| Gene1 of predicted pair                          |               | Gene2 of predicted pair |               |
| Systematic Name                                  | Standard Name | Systematic Name         | Standard Name |
| YPL106C                                          | SSE1          | YDR318W                 | MCM21         |
| YLR370C                                          | ARC18         | YLR425W                 | TUS1          |
| YIL156W                                          | UBP7          | YBL079W                 | NUP170        |
| YFL023W                                          | BUD27         | YLR398C                 | SKI2          |
| YBR217W                                          | ATG12         | YDR137W                 | RGP1          |
| YPR084W                                          | YPR084W       | YDL002C                 | NHP10         |
| YOR290C                                          | SNF2          | YLR370C                 | ARC18         |
| YGR249W                                          | MGA1          | YOR066W                 | MSA1          |
| YNL201C                                          | PSY2          | YLR410W                 | VIP1          |
| YGR249W                                          | MGA1          | YBR108W                 | YBR108W       |
| YMR246W                                          | FAA4          | YMR313C                 | TGL3          |
| YMR273C                                          | ZDS1          | YPL161C                 | BEM4          |
| YDL083C                                          | RPS16B        | YER122C                 | GLO3          |
| YPL115C                                          | BEM3          | YEL056W                 | HAT2          |
| YOR156C                                          | NFI1          | YGL237C                 | HAP2          |
| YGL025C                                          | PGD1          | YML071C                 | COG8          |
| YIL008W                                          | URM1          | YJL190C                 | RPS22A        |
| YOR191W                                          | RIS1          | YHR077C                 | NMD2          |
| YML103C                                          | NUP188        | YNL199C                 | GCR2          |
| YGR020C                                          | VMA7          | YAR014C                 | BUD14         |
| YDR484W                                          | VPS52         | YOL018C                 | TLG2          |
| YIL034C                                          | CAP2          | YDR155C                 | CPR1          |
| YJL124C                                          | LSM1          | YML028W                 | TSA1          |
| YLR234W                                          | TOP3          | YOR039W                 | CKB2          |
| YPL195W                                          | APL5          | YOR327C                 | SNC2          |
| YOL121C                                          | RPS19A        | YMR214W                 | SCJ1          |
| YJL183W                                          | MNN11         | YLR398C                 | SKI2          |
| YOL117W                                          | RRI2          | YJR084W                 | CSN12         |
| YMR198W                                          | CIK1          | YBR194W                 | SOY1          |

| Predictions at threshold level 0.80 continued... |               |                         |               |
|--------------------------------------------------|---------------|-------------------------|---------------|
| Gene1 of predicted pair                          |               | Gene2 of predicted pair |               |
| Systematic Name                                  | Standard Name | Systematic Name         | Standard Name |
| YML115C                                          | VAN1          | YKR099W                 | BAS1          |
| YNL243W                                          | SLA2          | YML094W                 | GIM5          |
| YGR261C                                          | APL6          | YNL238W                 | KEX2          |
| YJR135C                                          | MCM22         | YDL226C                 | GCS1          |
| YFR010W                                          | UBP6          | YHR013C                 | ARD1          |
| YNL243W                                          | SLA2          | YJL148W                 | RPA34         |
| YPL024W                                          | RMI1          | YML071C                 | COG8          |
| YML058W                                          | SML1          | YPR120C                 | CLB5          |
| YDR443C                                          | SSN2          | YOR008C                 | SLG1          |
| YLR234W                                          | TOP3          | YML013W                 | UBX2          |
| YHR161C                                          | YAP1801       | YOR035C                 | SHE4          |
| YDR443C                                          | SSN2          | YMR142C                 | RPL13B        |
| YMR004W                                          | MVP1          | YGR020C                 | VMA7          |
| YJR106W                                          | ECM27         | YMR319C                 | FET4          |
| YKL116C                                          | PRR1          | YMR311C                 | GLC8          |
| YKL080W                                          | VMA5          | YJL095W                 | BCK1          |
| YLR083C                                          | EMP70         | YNL069C                 | RPL16B        |
| YKR095W                                          | MLP1          | YKL068W                 | NUP100        |
| YHR200W                                          | RPN10         | YKR048C                 | NAP1          |
| YDL184C                                          | RPL41A        | YMR153W                 | NUP53         |
| YHL020C                                          | OPI1          | YER120W                 | SCS2          |
| YNL291C                                          | MID1          | YJR060W                 | CBF1          |
| YOR083W                                          | WHI5          | YDR254W                 | CHL4          |
| YGR184C                                          | UBR1          | YLR032W                 | RAD5          |
| YHR039C-A                                        | VMA10         | YER040W                 | GLN3          |
| YBL008W                                          | HIR1          | YLR320W                 | MMS22         |
| YFL013C                                          | IES1          | YLR315W                 | NKP2          |
| YNL079C                                          | TPM1          | YBL067C                 | UBP13         |
| YJR059W                                          | PTK2          | YIL148W                 | RPL40A        |

| Predictions at threshold level 0.80 continued... |               |                         |               |
|--------------------------------------------------|---------------|-------------------------|---------------|
| Gene1 of predicted pair                          |               | Gene2 of predicted pair |               |
| Systematic Name                                  | Standard Name | Systematic Name         | Standard Name |
| YGL250W                                          | RMR1          | YLR350W                 | ORM2          |
| YOR023C                                          | AHC1          | YEL056W                 | HAT2          |
| YGR072W                                          | UPF3          | YPR032W                 | SRO7          |
| YJL060W                                          | BNA3          | YLR058C                 | SHM2          |
| YNR072W                                          | HXT17         | YLR371W                 | ROM2          |
| YOR132W                                          | VPS17         | YHR012W                 | VPS29         |
| YLR192C                                          | HCR1          | YMR214W                 | SCJ1          |
| YKL126W                                          | YPK1          | YPR046W                 | MCM16         |
| YKR035W-A                                        | DID2          | YBR019C                 | GAL10         |
| YLR135W                                          | SLX4          | YGR071C                 | YGR071C       |
| YNL325C                                          | FIG4          | YLR370C                 | ARC18         |
| YBL058W                                          | SHP1          | YBR030W                 | YBR030W       |
| YMR224C                                          | MRE11         | YER116C                 | SLX8          |
| YMR153W                                          | NUP53         | YDL077C                 | VAM6          |
| YIL076W                                          | SEC28         | YDL184C                 | RPL41A        |
| YMR038C                                          | CCS1          | YOR014W                 | RTS1          |
| YLR234W                                          | TOP3          | YMR199W                 | CLN1          |
| YDR439W                                          | LRS4          | YJR063W                 | RPA12         |
| YDR110W                                          | FOB1          | YBR119W                 | MUD1          |
| YGR054W                                          | YGR054W       | YGR188C                 | BUB1          |
| YML001W                                          | YPT7          | YDR261C                 | EXG2          |
| YMR224C                                          | MRE11         | YMR284W                 | YKU70         |
| YMR152W                                          | YIM1          | YOR327C                 | SNC2          |
| YDL192W                                          | ARF1          | YDL077C                 | VAM6          |
| YLR234W                                          | TOP3          | YBL021C                 | HAP3          |
| YDR137W                                          | RGP1          | YOL081W                 | IRA2          |
| YEL027W                                          | CUP5          | YJL095W                 | BCK1          |
| YNL325C                                          | FIG4          | YKR035W-A               | DID2          |
| YDR004W                                          | RAD57         | YLR234W                 | TOP3          |



| Predictions at threshold level 0.80 continued... |               |                         |               |
|--------------------------------------------------|---------------|-------------------------|---------------|
| Gene1 of predicted pair                          |               | Gene2 of predicted pair |               |
| Systematic Name                                  | Standard Name | Systematic Name         | Standard Name |
| YDR310C                                          | SUM1          | YKR030W                 | GMH1          |
| YER116C                                          | SLX8          | YPL137C                 | GIP3          |
| YJL127C                                          | SPT10         | YDR378C                 | LSM6          |
| YBR107C                                          | IML3          | YDR183W                 | PLP1          |
| YOR080W                                          | DIA2          | YBR200W                 | BEM1          |
| YLR386W                                          | VAC14         | YNL307C                 | MCK1          |
| YPL178W                                          | CBC2          | YKR024C                 | DBP7          |
| YPL042C                                          | SSN3          | YLR315W                 | NKP2          |
| YKL139W                                          | CTK1          | YHR108W                 | GGA2          |
| YDR137W                                          | RGP1          | YHR060W                 | VMA22         |
| YJL060W                                          | BNA3          | YDR254W                 | CHL4          |
| YDR293C                                          | SSD1          | YGL237C                 | HAP2          |
| YAL051W                                          | OAF1          | YDR076W                 | RAD55         |
| YBR200W                                          | BEM1          | YDR254W                 | CHL4          |
| YAL024C                                          | LTE1          | YKL126W                 | YPK1          |
| YPL057C                                          | SUR1          | YAL002W                 | VPS8          |
| YJL172W                                          | CPS1          | YDR261C                 | EXG2          |
| YNL307C                                          | MCK1          | YBR280C                 | SAF1          |
| YNL248C                                          | RPA49         | YOL054W                 | PSH1          |
| YNL288W                                          | CAF40         | YDR183W                 | PLP1          |
| YHL031C                                          | GOS1          | YOR038C                 | HIR2          |
| YDR363W-A                                        | SEM1          | YDR318W                 | MCM21         |
| YJL036W                                          | SNX4          | YDR153C                 | ENT5          |
| YFR010W                                          | UBP6          | YDL047W                 | SIT4          |
| YLL007C                                          | YLL007C       | YDR293C                 | SSD1          |
| YOR368W                                          | RAD17         | YJR035W                 | RAD26         |
| YFR010W                                          | UBP6          | YBL103C                 | RTG3          |
| YPL213W                                          | LEA1          | YJL006C                 | CTK2          |
| YOL051W                                          | GAL11         | YCR084C                 | TUP1          |

| Predictions at threshold level 0.80 continued... |               |                         |               |
|--------------------------------------------------|---------------|-------------------------|---------------|
| Gene1 of predicted pair                          |               | Gene2 of predicted pair |               |
| Systematic Name                                  | Standard Name | Systematic Name         | Standard Name |
| YPL057C                                          | SUR1          | YNL238W                 | KEX2          |
| YGL124C                                          | MON1          | YDL226C                 | GCS1          |
| YPL037C                                          | EGD1          | YJR084W                 | CSN12         |
| YBR200W                                          | BEM1          | YGL253W                 | HXK2          |
| YKL048C                                          | ELM1          | YDR310C                 | SUM1          |
| YJL183W                                          | MNN11         | YBL072C                 | RPS8A         |
| YDR254W                                          | CHL4          | YOR141C                 | ARP8          |
| YNL107W                                          | YAF9          | YHR115C                 | DMA1          |
| YGR142W                                          | BTN2          | YER074W-A               | YOS1          |
| YKR001C                                          | VPS1          | YBR283C                 | SSH1          |
| YPL234C                                          | TFP3          | YNL107W                 | YAF9          |
| YBL102W                                          | SFT2          | YCR066W                 | RAD18         |
| YDL223C                                          | HBT1          | YKL048C                 | ELM1          |
| YOR127W                                          | RGA1          | YDR289C                 | RTT103        |
| YOR195W                                          | SLK19         | YKR061W                 | KTR2          |
| YIL053W                                          | RHR2          | YGL115W                 | SNF4          |
| YBR215W                                          | HPC2          | YLR320W                 | MMS22         |
| YLR083C                                          | EMP70         | YOR106W                 | VAM3          |
| YPL129W                                          | TAF14         | YEL044W                 | IES6          |
| YBR173C                                          | UMP1          | YPL195W                 | APL5          |
| YJL154C                                          | VPS35         | YEL036C                 | ANP1          |
| YDR293C                                          | SSD1          | YER162C                 | RAD4          |
| YGR055W                                          | MUP1          | YPL240C                 | HSP82         |
| YDR137W                                          | RGP1          | YPL161C                 | BEM4          |
| YGR249W                                          | MGA1          | YMR230W                 | RPS10B        |
| YIL034C                                          | CAP2          | YLR292C                 | SEC72         |
| YPR040W                                          | TIP41         | YPL161C                 | BEM4          |
| YBR111W-A                                        | SUS1          | YPL248C                 | GAL4          |
| YBL021C                                          | HAP3          | YOR358W                 | HAP5          |

| Predictions at threshold level 0.80 continued... |               |                         |               |
|--------------------------------------------------|---------------|-------------------------|---------------|
| Gene1 of predicted pair                          |               | Gene2 of predicted pair |               |
| Systematic Name                                  | Standard Name | Systematic Name         | Standard Name |
| YAL024C                                          | LTE1          | YDL002C                 | NHP10         |
| YCL037C                                          | SRO9          | YPL195W                 | APL5          |
| YOR023C                                          | AHC1          | YPR051W                 | MAK3          |
| YIL159W                                          | BNR1          | YLR386W                 | VAC14         |
| YNL297C                                          | MON2          | YNL238W                 | KEX2          |
| YOR275C                                          | RIM20         | YJL095W                 | BCK1          |
| YER044C                                          | ERG28         | YDL192W                 | ARF1          |
| YBR030W                                          | YBR030W       | YMR133W                 | REC114        |
| YJR084W                                          | CSN12         | YML097C                 | VPS9          |
| YDR335W                                          | MSN5          | YER105C                 | NUP157        |
| YJL157C                                          | FAR1          | YJL187C                 | SWE1          |
| YDL184C                                          | RPL41A        | YBR036C                 | CSG2          |
| YDR293C                                          | SSD1          | YDL077C                 | VAM6          |
| YDR144C                                          | MKC7          | YJL095W                 | BCK1          |
| YPL178W                                          | CBC2          | YOR358W                 | HAP5          |
| YLR192C                                          | HCR1          | YDR261C                 | EXG2          |
| YMR224C                                          | MRE11         | YDL077C                 | VAM6          |
| YJR140C                                          | HIR3          | YNL107W                 | YAF9          |
| YMR153W                                          | NUP53         | YER139C                 | YER139C       |
| YGL200C                                          | EMP24         | YJL095W                 | BCK1          |
| YEL009C                                          | GCN4          | YBL008W                 | HIR1          |
| YDL020C                                          | RPN4          | YDR293C                 | SSD1          |
| YGL163C                                          | RAD54         | YDR289C                 | RTT103        |
| YFR010W                                          | UBP6          | YNR072W                 | HXT17         |
| YLR441C                                          | RPS1A         | YDR261C                 | EXG2          |
| YLR386W                                          | VAC14         | YML115C                 | VAN1          |
| YPL121C                                          | MEI5          | YHR079C-A               | SAE3          |
| YMR199W                                          | CLN1          | YOR008C                 | SLG1          |
| YGL163C                                          | RAD54         | YBR036C                 | CSG2          |

| Predictions at threshold level 0.80 continued... |               |                         |               |
|--------------------------------------------------|---------------|-------------------------|---------------|
| Gene1 of predicted pair                          |               | Gene2 of predicted pair |               |
| Systematic Name                                  | Standard Name | Systematic Name         | Standard Name |
| YOR327C                                          | SNC2          | YOL081W                 | IRA2          |
| YKL010C                                          | UFD4          | YBL047C                 | EDE1          |
| YGL115W                                          | SNF4          | YDL006W                 | PTC1          |
| YMR039C                                          | SUB1          | YPR120C                 | CLB5          |
| YPR084W                                          | YPR084W       | YDR245W                 | MNN10         |
| YER116C                                          | SLX8          | YHR081W                 | LRP1          |
| YGL215W                                          | CLG1          | YKL041W                 | VPS24         |
| YGL147C                                          | RPL9A         | YPL037C                 | EGD1          |
| YNL069C                                          | RPL16B        | YOR327C                 | SNC2          |
| YOR112W                                          | CEX1          | YGL223C                 | COG1          |
| YKR057W                                          | RPS21A        | YJL095W                 | BCK1          |
| YGL148W                                          | ARO2          | YDR310C                 | SUM1          |
| YML095C                                          | RAD10         | YHR200W                 | RPN10         |
| YLR292C                                          | SEC72         | YOR127W                 | RGA1          |
| YPL253C                                          | VIK1          | YMR109W                 | MYO5          |
| YKL126W                                          | YPK1          | YPL057C                 | SUR1          |
| YGL078C                                          | DBP3          | YNL032W                 | SIW14         |
| YBR108W                                          | YBR108W       | YJR135C                 | MCM22         |
| YPL253C                                          | VIK1          | YDR378C                 | LSM6          |
| YLR371W                                          | ROM2          | YMR214W                 | SCJ1          |
| YKR061W                                          | KTR2          | YPL152W                 | RRD2          |
| YDL184C                                          | RPL41A        | YBL103C                 | RTG3          |
| YDR378C                                          | LSM6          | YGR135W                 | PRE9          |
| YKR001C                                          | VPS1          | YOR014W                 | RTS1          |
| YJL058C                                          | BIT61         | YBR215W                 | HPC2          |
| YGL025C                                          | PGD1          | YPR046W                 | MCM16         |
| YMR179W                                          | SPT21         | YLR429W                 | CRN1          |
| YBR107C                                          | IML3          | YJR032W                 | CPR7          |
| YJR125C                                          | ENT3          | YNR006W                 | VPS27         |

| Predictions at threshold level 0.80 continued... |               |                         |               |
|--------------------------------------------------|---------------|-------------------------|---------------|
| Gene1 of predicted pair                          |               | Gene2 of predicted pair |               |
| Systematic Name                                  | Standard Name | Systematic Name         | Standard Name |
| YLR360W                                          | VPS38         | YDL077C                 | VAM6          |
| YDR156W                                          | RPA14         | YNL106C                 | INP52         |
| YNL243W                                          | SLA2          | YIL034C                 | CAP2          |
| YOR043W                                          | WHI2          | YEL053C                 | MAK10         |
| YMR172W                                          | HOT1          | YHR178W                 | STB5          |
| YDR477W                                          | SNF1          | YPL195W                 | APL5          |
| YLR288C                                          | MEC3          | YLR435W                 | TSR2          |
| YLR381W                                          | CTF3          | YGL003C                 | CDH1          |
| YNL106C                                          | INP52         | YJR063W                 | RPA12         |
| YHR178W                                          | STB5          | YIL008W                 | URM1          |
| YGR108W                                          | CLB1          | YDR310C                 | SUM1          |
| YLR254C                                          | NDL1          | YML112W                 | CTK3          |
| YOR038C                                          | HIR2          | YOR368W                 | RAD17         |
| YOR337W                                          | TEA1          | YMR230W                 | RPS10B        |
| YLR292C                                          | SEC72         | YGR188C                 | BUB1          |
| YFR043C                                          | IRC6          | YLR248W                 | RCK2          |
| YGL212W                                          | VAM7          | YLR398C                 | SKI2          |
| YFL003C                                          | MSH4          | YDL154W                 | MSH5          |
| YPR046W                                          | MCM16         | YLR032W                 | RAD5          |
| YBL019W                                          | APN2          | YMR038C                 | CCS1          |
| YLL026W                                          | HSP104        | YNL041C                 | COG6          |
| YBR131W                                          | CCZ1          | YMR004W                 | MVP1          |
| YGL151W                                          | NUT1          | YGL124C                 | MON1          |
| YIL159W                                          | BNR1          | YBR030W                 | YBR030W       |
| YNL032W                                          | SIW14         | YDR310C                 | SUM1          |
| YMR142C                                          | RPL13B        | YER162C                 | RAD4          |
| YDL101C                                          | DUN1          | YNL016W                 | PUB1          |
| YKL139W                                          | CTK1          | YDR318W                 | MCM21         |
| YNL054W                                          | VAC7          | YLR182W                 | SWI6          |

| Predictions at threshold level 0.80 continued... |               |                         |               |
|--------------------------------------------------|---------------|-------------------------|---------------|
| Gene1 of predicted pair                          |               | Gene2 of predicted pair |               |
| Systematic Name                                  | Standard Name | Systematic Name         | Standard Name |
| YNL087W                                          | TCB2          | YGL115W                 | SNF4          |
| YML103C                                          | NUP188        | YJR059W                 | PTK2          |
| YPL001W                                          | HAT1          | YDR076W                 | RAD55         |
| YGL147C                                          | RPL9A         | YER139C                 | YER139C       |
| YPL120W                                          | VPS30         | YER122C                 | GLO3          |
| YDR202C                                          | RAV2          | YNL107W                 | YAF9          |
| YBL102W                                          | SFT2          | YOR106W                 | VAM3          |
| YDR507C                                          | GIN4          | YHR152W                 | SPO12         |
| YHR012W                                          | VPS29         | YBR283C                 | SSH1          |
| YPL115C                                          | BEM3          | YGL087C                 | MMS2          |
| YBR194W                                          | SOY1          | YHL031C                 | GOS1          |
| YDR146C                                          | SWI5          | YOL051W                 | GAL11         |
| YJL124C                                          | LSM1          | YOR368W                 | RAD17         |
| YPL137C                                          | GIP3          | YDL077C                 | VAM6          |
| YBL047C                                          | EDE1          | YKR001C                 | VPS1          |
| YNL041C                                          | COG6          | YOL018C                 | TLG2          |
| YNL206C                                          | RTT106        | YKL101W                 | HSL1          |
| YBR173C                                          | UMP1          | YGL003C                 | CDH1          |
| YJR058C                                          | APS2          | YOR035C                 | SHE4          |
| YHR081W                                          | LRP1          | YJL095W                 | BCK1          |
| YGL087C                                          | MMS2          | YGR270W                 | YTA7          |
| YIL034C                                          | CAP2          | YBR114W                 | RAD16         |
| YLR234W                                          | TOP3          | YJL190C                 | RPS22A        |
| YBR057C                                          | MUM2          | YOR035C                 | SHE4          |
| YJL176C                                          | SWI3          | YOL081W                 | IRA2          |
| YMR142C                                          | RPL13B        | YBR280C                 | SAF1          |
| YCR084C                                          | TUP1          | YKL181W                 | PRS1          |
| YMR016C                                          | SOK2          | YOR066W                 | MSA1          |
| YLR429W                                          | CRN1          | YPL018W                 | CTF19         |

| Predictions at threshold level 0.80 continued... |               |                         |               |
|--------------------------------------------------|---------------|-------------------------|---------------|
| Gene1 of predicted pair                          |               | Gene2 of predicted pair |               |
| Systematic Name                                  | Standard Name | Systematic Name         | Standard Name |
| YNL201C                                          | PSY2          | YNL215W                 | IES2          |
| YBR228W                                          | SLX1          | YPL079W                 | RPL21B        |
| YDR477W                                          | SNF1          | YML062C                 | MFT1          |
| YDL020C                                          | RPN4          | YNL291C                 | MID1          |
| YDR192C                                          | NUP42         | YBL079W                 | NUP170        |
| YCR020C-A                                        | MAK31         | YMR004W                 | MVP1          |
| YDR320C                                          | SWA2          | YOL018C                 | TLG2          |
| YMR199W                                          | CLN1          | YOR358W                 | HAP5          |
| YHL031C                                          | GOS1          | YJR060W                 | CBF1          |
| YDR507C                                          | GIN4          | YBR267W                 | REI1          |
| YLR292C                                          | SEC72         | YLR360W                 | VPS38         |
| YKR072C                                          | SIS2          | YBR082C                 | UBC4          |
| YGL147C                                          | RPL9A         | YHR060W                 | VMA22         |
| YPR018W                                          | RLF2          | YDR227W                 | SIR4          |
| YBL067C                                          | UBP13         | YLR425W                 | TUS1          |
| YDR146C                                          | SWI5          | YOR014W                 | RTS1          |
| YBL051C                                          | PIN4          | YMR127C                 | SAS2          |
| YPL161C                                          | BEM4          | YJR090C                 | GRR1          |
| YDL223C                                          | HBT1          | YBL047C                 | EDE1          |
| YER087C-B                                        | SBH1          | YLR055C                 | SPT8          |
| YMR202W                                          | ERG2          | YJL006C                 | CTK2          |
| YBR228W                                          | SLX1          | YBR082C                 | UBC4          |
| YOR080W                                          | DIA2          | YNL107W                 | YAF9          |
| YEL042W                                          | GDA1          | YDR310C                 | SUM1          |
| YBL079W                                          | NUP170        | YKL068W                 | NUP100        |
| YDR335W                                          | MSN5          | YFR030W                 | MET10         |
| YMR026C                                          | PEX12         | YDL083C                 | RPS16B        |
| YNL307C                                          | MCK1          | YNL041C                 | COG6          |
| YLR119W                                          | SRN2          | YLR320W                 | MMS22         |

| Predictions at threshold level 0.80 continued... |               |                         |               |
|--------------------------------------------------|---------------|-------------------------|---------------|
| Gene1 of predicted pair                          |               | Gene2 of predicted pair |               |
| Systematic Name                                  | Standard Name | Systematic Name         | Standard Name |
| YDR507C                                          | GIN4          | YER027C                 | GAL83         |
| YBR274W                                          | CHK1          | YBR195C                 | MSI1          |
| YMR004W                                          | MVP1          | YNL051W                 | COG5          |
| YOR195W                                          | SLK19         | YDL226C                 | GCS1          |
| YBR108W                                          | YBR108W       | YLR447C                 | VMA6          |
| YPL253C                                          | VIK1          | YNL225C                 | CNM67         |
| YNL325C                                          | FIG4          | YOR290C                 | SNF2          |
| YLR360W                                          | VPS38         | YNL051W                 | COG5          |
| YDR080W                                          | VPS41         | YDR323C                 | PEP7          |
| YBR173C                                          | UMP1          | YBL103C                 | RTG3          |
| YBL102W                                          | SFT2          | YNL238W                 | KEX2          |
| YDL184C                                          | RPL41A        | YDL077C                 | VAM6          |
| YDR378C                                          | LSM6          | YNL107W                 | YAF9          |
| YJR035W                                          | RAD26         | YOR014W                 | RTS1          |
| YKL160W                                          | ELF1          | YNL236W                 | SIN4          |
| YLR170C                                          | APS1          | YPR029C                 | APL4          |
| YAL024C                                          | LTE1          | YGR270W                 | YTA7          |
| YDR440W                                          | DOT1          | YNL107W                 | YAF9          |
| YHR039C-A                                        | VMA10         | YNL238W                 | KEX2          |
| YBR036C                                          | CSG2          | YMR214W                 | SCJ1          |
| YDL005C                                          | MED2          | YKR048C                 | NAP1          |
| YER158C                                          | YER158C       | YAR014C                 | BUD14         |
| YBR030W                                          | YBR030W       | YER162C                 | RAD4          |
| YEL050C                                          | RML2          | YDR200C                 | VPS64         |
| YML115C                                          | VAN1          | YDL192W                 | ARF1          |
| YCR034W                                          | FEN1          | YMR167W                 | MLH1          |
| YPL046C                                          | ELC1          | YJR052W                 | RAD7          |
| YMR311C                                          | GLC8          | YOR014W                 | RTS1          |
| YBL021C                                          | HAP3          | YKL048C                 | ELM1          |



| Predictions at threshold level 0.80 continued... |               |                         |               |
|--------------------------------------------------|---------------|-------------------------|---------------|
| Gene1 of predicted pair                          |               | Gene2 of predicted pair |               |
| Systematic Name                                  | Standard Name | Systematic Name         | Standard Name |
| YDR137W                                          | RGP1          | YKL160W                 | ELF1          |
| YKR020W                                          | VPS51         | YBL072C                 | RPS8A         |
| YGL087C                                          | MMS2          | YJR135C                 | MCM22         |
| YPR036W                                          | VMA13         | YHR081W                 | LRP1          |
| YGL003C                                          | CDH1          | YDL226C                 | GCS1          |
| YPL042C                                          | SSN3          | YEL050C                 | RML2          |
| YPL057C                                          | SUR1          | YHR200W                 | RPN10         |
| YJR056C                                          | YJR056C       | YNL238W                 | KEX2          |
| YDR156W                                          | RPA14         | YNL307C                 | MCK1          |
| YPR051W                                          | MAK3          | YEL056W                 | HAT2          |
| YMR127C                                          | SAS2          | YJR135C                 | MCM22         |
| YPR017C                                          | DSS4          | YCL037C                 | SRO9          |
| YKL116C                                          | PRR1          | YER139C                 | YER139C       |
| YNL297C                                          | MON2          | YMR054W                 | STV1          |
| YKR099W                                          | BAS1          | YLR452C                 | SST2          |
| YPL022W                                          | RAD1          | YJL124C                 | LSM1          |
| YGL147C                                          | RPL9A         | YJL172W                 | CPS1          |
| YNL329C                                          | PEX6          | YBL101C                 | ECM21         |
| YDR469W                                          | SDC1          | YJL140W                 | RPB4          |
| YLR090W                                          | XDJ1          | YER144C                 | UBP5          |
| YGR270W                                          | YTA7          | YIR005W                 | IST3          |
| YDR153C                                          | ENT5          | YDL137W                 | ARF2          |
| YML028W                                          | TSA1          | YBR082C                 | UBC4          |
| YER144C                                          | UBP5          | YMR133W                 | REC114        |
| YER116C                                          | SLX8          | YPL057C                 | SUR1          |
| YJL183W                                          | MNN11         | YMR214W                 | SCJ1          |
| YEL027W                                          | CUP5          | YJL183W                 | MNN11         |
| YDL002C                                          | NHP10         | YGL151W                 | NUT1          |
| YCR020C-A                                        | MAK31         | YKR020W                 | VPS51         |

| Predictions at threshold level 0.80 continued... |               |                         |               |
|--------------------------------------------------|---------------|-------------------------|---------------|
| Gene1 of predicted pair                          |               | Gene2 of predicted pair |               |
| Systematic Name                                  | Standard Name | Systematic Name         | Standard Name |
| YPL105C                                          | YPL105C       | YJL004C                 | SYS1          |
| YBL088C                                          | TEL1          | YJL106W                 | IME2          |
| YGL174W                                          | BUD13         | YDR469W                 | SDC1          |
| YHR061C                                          | GIC1          | YCR086W                 | CSM1          |
| YGR270W                                          | YTA7          | YFR036W                 | CDC26         |
| YLR079W                                          | SIC1          | YJL124C                 | LSM1          |
| YKL025C                                          | PAN3          | YBR200W                 | BEM1          |
| YCR020C-A                                        | MAK31         | YBL102W                 | SFT2          |
| YLR079W                                          | SIC1          | YKL139W                 | CTK1          |
| YLR386W                                          | VAC14         | YDR155C                 | CPR1          |
| YML102W                                          | CAC2          | YGL163C                 | RAD54         |
| YCR020C-A                                        | MAK31         | YEL051W                 | VMA8          |
| YDL184C                                          | RPL41A        | YDR358W                 | GGA1          |
| YOR337W                                          | TEA1          | YEL060C                 | PRB1          |
| YIL076W                                          | SEC28         | YHR200W                 | RPN10         |
| YLR324W                                          | PEX30         | YMR204C                 | INP1          |
| YLR381W                                          | CTF3          | YJL183W                 | MNN11         |
| YBR108W                                          | YBR108W       | YLR370C                 | ARC18         |
| YMR205C                                          | PFK2          | YDR245W                 | MNN10         |
| YHR012W                                          | VPS29         | YCR086W                 | CSM1          |
| YBR131W                                          | CCZ1          | YPL161C                 | BEM4          |
| YER143W                                          | DDI1          | YOL018C                 | TLG2          |
| YLR094C                                          | GIS3          | YLR093C                 | NYV1          |
| YOL030W                                          | GAS5          | YJR035W                 | RAD26         |
| YBR173C                                          | UMP1          | YMR230W                 | RPS10B        |
| YDR329C                                          | PEX3          | YDR265W                 | PEX10         |
| YKL116C                                          | PRR1          | YGL003C                 | CDH1          |
| YLR370C                                          | ARC18         | YDL226C                 | GCS1          |
| YMR198W                                          | CIK1          | YDR254W                 | CHL4          |

| Predictions at threshold level 0.80 continued... |               |                         |               |
|--------------------------------------------------|---------------|-------------------------|---------------|
| Gene1 of predicted pair                          |               | Gene2 of predicted pair |               |
| Systematic Name                                  | Standard Name | Systematic Name         | Standard Name |
| YGL060W                                          | YBP2          | YPL106C                 | SSE1          |
| YOR043W                                          | WHI2          | YDL006W                 | PTC1          |
| YEL044W                                          | IES6          | YMR089C                 | YTA12         |
| YKR001C                                          | VPS1          | YHR039C-A               | VMA10         |
| YOL111C                                          | MDY2          | YDL077C                 | VAM6          |
| YBL103C                                          | RTG3          | YIL133C                 | RPL16A        |
| YBR057C                                          | MUM2          | YPL057C                 | SUR1          |
| YML095C                                          | RAD10         | YBL087C                 | RPL23A        |
| YPR084W                                          | YPR084W       | YNL025C                 | SSN8          |
| YDR137W                                          | RGP1          | YDR207C                 | UME6          |
| YBR019C                                          | GAL10         | YER122C                 | GLO3          |
| YBL008W                                          | HIR1          | YDR225W                 | HTA1          |
| YLR399C                                          | BDF1          | YDR289C                 | RTT103        |
| YLR095C                                          | IOC2          | YDR137W                 | RGP1          |
| YOR080W                                          | DIA2          | YML095C                 | RAD10         |
| YNL025C                                          | SSN8          | YER139C                 | YER139C       |
| YPL057C                                          | SUR1          | YBR036C                 | CSG2          |
| YDL223C                                          | HBT1          | YNL307C                 | MCK1          |
| YPL022W                                          | RAD1          | YLR381W                 | CTF3          |
| YJL176C                                          | SWI3          | YHR167W                 | THP2          |
| YBR107C                                          | IML3          | YCR086W                 | CSM1          |
| YLR452C                                          | SST2          | YOL081W                 | IRA2          |
| YLR371W                                          | ROM2          | YOR014W                 | RTS1          |
| YFR031C-A                                        | RPL2A         | YHR060W                 | VMA22         |
| YLR234W                                          | TOP3          | YER162C                 | RAD4          |
| YDL052C                                          | SLC1          | YOR059C                 | YOR059C       |
| YOR083W                                          | WHI5          | YML095C                 | RAD10         |
| YDL006W                                          | PTC1          | YDL192W                 | ARF1          |
| YML012W                                          | ERV25         | YKR014C                 | YPT52         |

| Predictions at threshold level 0.80 continued... |               |                         |               |
|--------------------------------------------------|---------------|-------------------------|---------------|
| Gene1 of predicted pair                          |               | Gene2 of predicted pair |               |
| Systematic Name                                  | Standard Name | Systematic Name         | Standard Name |
| YPR131C                                          | NAT3          | YGL003C                 | CDH1          |
| YGR188C                                          | BUB1          | YPR119W                 | CLB2          |
| YOR195W                                          | SLK19         | YDR260C                 | SWM1          |
| YLL039C                                          | UBI4          | YJL006C                 | CTK2          |
| YGL135W                                          | RPL1B         | YKR014C                 | YPT52         |
| YDR448W                                          | ADA2          | YNL107W                 | YAF9          |
| YKL048C                                          | ELM1          | YDR254W                 | CHL4          |
| YIL151C                                          | YIL151C       | YPL240C                 | HSP82         |
| YPL024W                                          | RMI1          | YDL155W                 | CLB3          |
| YJL149W                                          | YJL149W       | YML088W                 | UFO1          |
| YMR055C                                          | BUB2          | YGL253W                 | HXK2          |
| YNL297C                                          | MON2          | YPL161C                 | BEM4          |
| YIL053W                                          | RHR2          | YMR153W                 | NUP53         |
| YKL002W                                          | DID4          | YKL041W                 | VPS24         |
| YLR090W                                          | XDJ1          | YLR093C                 | NYV1          |
| YNL016W                                          | PUB1          | YCR086W                 | CSM1          |
| YMR004W                                          | MVP1          | YDL077C                 | VAM6          |
| YLR399C                                          | BDF1          | YOL054W                 | PSH1          |
| YPL213W                                          | LEA1          | YJL183W                 | MNN11         |
| YDR004W                                          | RAD57         | YDR146C                 | SWI5          |
| YMR192W                                          | GYL1          | YBR108W                 | YBR108W       |
| YKL116C                                          | PRR1          | YPR046W                 | MCM16         |
| YKL032C                                          | IXR1          | YIL008W                 | URM1          |
| YMR198W                                          | CIK1          | YOR141C                 | ARP8          |
| YDR137W                                          | RGP1          | YNL307C                 | MCK1          |
| YLR119W                                          | SRN2          | YER139C                 | YER139C       |
| YKL117W                                          | SBA1          | YML057W                 | CMP2          |
| YMR026C                                          | PEX12         | YMR142C                 | RPL13B        |
| YFR031C-A                                        | RPL2A         | YOR132W                 | VPS17         |

| Predictions at threshold level 0.80 continued... |               |                         |               |
|--------------------------------------------------|---------------|-------------------------|---------------|
| Gene1 of predicted pair                          |               | Gene2 of predicted pair |               |
| Systematic Name                                  | Standard Name | Systematic Name         | Standard Name |
| YLR337C                                          | VRP1          | YAR014C                 | BUD14         |
| YHR081W                                          | LRP1          | YOL121C                 | RPS19A        |
| YLR410W                                          | VIP1          | YLR306W                 | UBC12         |
| YIL148W                                          | RPL40A        | YNL199C                 | GCR2          |
| YGR188C                                          | BUB1          | YDR207C                 | UME6          |
| YLR090W                                          | XDJ1          | YOL121C                 | RPS19A        |
| YER144C                                          | UBP5          | YCR053W                 | THR4          |
| YJL004C                                          | SYS1          | YNL051W                 | COG5          |
| YMR224C                                          | MRE11         | YHR200W                 | RPN10         |
| YBR200W                                          | BEM1          | YMR199W                 | CLN1          |
| YFR010W                                          | UBP6          | YPL253C                 | VIK1          |
| YMR038C                                          | CCS1          | YML028W                 | TSA1          |
| YDR004W                                          | RAD57         | YMR039C                 | SUB1          |
| YDR176W                                          | NGG1          | YPL248C                 | GAL4          |
| YGL212W                                          | VAM7          | YJR033C                 | RAV1          |
| YER040W                                          | GLN3          | YDR207C                 | UME6          |
| YNL215W                                          | IES2          | YOR213C                 | SAS5          |
| YJL154C                                          | VPS35         | YOR035C                 | SHE4          |
| YOR069W                                          | VPS5          | YPL161C                 | BEM4          |
| YJL124C                                          | LSM1          | YOR043W                 | WHI2          |
| YPR051W                                          | MAK3          | YDR153C                 | ENT5          |
| YLR381W                                          | CTF3          | YOR358W                 | HAP5          |
| YBR108W                                          | YBR108W       | YKL126W                 | YPK1          |
| YLR447C                                          | VMA6          | YKR020W                 | VPS51         |
| YPR036W                                          | VMA13         | YKL048C                 | ELM1          |
| YKL010C                                          | UFD4          | YPL161C                 | BEM4          |
| YMR199W                                          | CLN1          | YGR059W                 | SPR3          |
| YLR337C                                          | VRP1          | YER139C                 | YER139C       |
| YJL183W                                          | MNN11         | YBL025W                 | RRN10         |

| Predictions at threshold level 0.80 continued... |               |                         |               |
|--------------------------------------------------|---------------|-------------------------|---------------|
| Gene1 of predicted pair                          |               | Gene2 of predicted pair |               |
| Systematic Name                                  | Standard Name | Systematic Name         | Standard Name |
| YLR234W                                          | TOP3          | YMR167W                 | MLH1          |
| YBR112C                                          | CYC8          | YCR084C                 | TUP1          |
| YOR195W                                          | SLK19         | YBL087C                 | RPL23A        |
| YGR261C                                          | APL6          | YHR039C-A               | VMA10         |
| YJL036W                                          | SNX4          | YOL108C                 | INO4          |
| YNL025C                                          | SSN8          | YER122C                 | GLO3          |
| YMR198W                                          | CIK1          | YBL047C                 | EDE1          |
| YER161C                                          | SPT2          | YER122C                 | GLO3          |
| YGR105W                                          | VMA21         | YPL120W                 | VPS30         |
| YOR080W                                          | DIA2          | YJL187C                 | SWE1          |
| YDR146C                                          | SWI5          | YBR260C                 | RGD1          |
| YBR200W                                          | BEM1          | YER044C                 | ERG28         |
| YBL079W                                          | NUP170        | YGL016W                 | KAP122        |
| YHR157W                                          | REC104        | YHL022C                 | SPO11         |
| YJR084W                                          | CSN12         | YJL095W                 | BCK1          |
| YPR120C                                          | CLB5          | YGL252C                 | RTG2          |
| YDR293C                                          | SSD1          | YNL044W                 | YIP3          |
| YMR202W                                          | ERG2          | YDR318W                 | MCM21         |
| YPL253C                                          | VIK1          | YLR371W                 | ROM2          |
| YLL007C                                          | YLL007C       | YER110C                 | KAP123        |
| YOR076C                                          | SKI7          | YLR398C                 | SKI2          |
| YBR107C                                          | IML3          | YAR014C                 | BUD14         |
| YPL115C                                          | BEM3          | YBR171W                 | SEC66         |
| YER044C                                          | ERG28         | YLR180W                 | SAM1          |
| YNR052C                                          | POP2          | YKL110C                 | KTI12         |
| YKR020W                                          | VPS51         | YHR115C                 | DMA1          |
| YPR036W                                          | VMA13         | YLR320W                 | MMS22         |
| YMR133W                                          | REC114        | YDL192W                 | ARF1          |
| YLR337C                                          | VRP1          | YEL036C                 | ANP1          |

| Predictions at threshold level 0.80 continued... |               |                         |               |
|--------------------------------------------------|---------------|-------------------------|---------------|
| Gene1 of predicted pair                          |               | Gene2 of predicted pair |               |
| Systematic Name                                  | Standard Name | Systematic Name         | Standard Name |
| YMR016C                                          | SOK2          | YNR072W                 | HXT17         |
| YDR245W                                          | MNN10         | YPL089C                 | RLM1          |
| YNL201C                                          | PSY2          | YLR381W                 | CTF3          |
| YIL034C                                          | CAP2          | YDR389W                 | SAC7          |
| YML115C                                          | VAN1          | YFR036W                 | CDC26         |
| YJR059W                                          | PTK2          | YMR273C                 | ZDS1          |
| YLR386W                                          | VAC14         | YOR035C                 | SHE4          |
| YHR084W                                          | STE12         | YBL016W                 | FUS3          |
| YDL101C                                          | DUN1          | YBL088C                 | TEL1          |
| YGL250W                                          | RMR1          | YGL019W                 | CKB1          |
| YCR024C-A                                        | PMP1          | YMR273C                 | ZDS1          |
| YLR119W                                          | SRN2          | YMR133W                 | REC114        |
| YDR378C                                          | LSM6          | YJL183W                 | MNN11         |
| YMR109W                                          | MYO5          | YCR086W                 | CSM1          |
| YMR198W                                          | CIK1          | YJL006C                 | CTK2          |
| YHR134W                                          | WSS1          | YGL253W                 | HXK2          |
| YJR033C                                          | RAV1          | YDR207C                 | UME6          |
| YOR213C                                          | SAS5          | YER139C                 | YER139C       |
| YPL220W                                          | RPL1A         | YKR026C                 | GCN3          |
| YDR363W-A                                        | SEM1          | YNL236W                 | SIN4          |
| YHR039C-A                                        | VMA10         | YGL124C                 | MON1          |
| YLR288C                                          | MEC3          | YGR081C                 | SLX9          |
| YFR010W                                          | UBP6          | YLR182W                 | SWI6          |
| YCL037C                                          | SRO9          | YEL053C                 | MAK10         |
| YLR192C                                          | HCR1          | YHR081W                 | LRP1          |
| YGR020C                                          | VMA7          | YJR060W                 | CBF1          |
| YBR171W                                          | SEC66         | YCR086W                 | CSM1          |
| YJR140C                                          | HIR3          | YJR032W                 | CPR7          |
| YKL032C                                          | IXR1          | YKL041W                 | VPS24         |

| Predictions at threshold level 0.80 continued... |               |                         |               |
|--------------------------------------------------|---------------|-------------------------|---------------|
| Gene1 of predicted pair                          |               | Gene2 of predicted pair |               |
| Systematic Name                                  | Standard Name | Systematic Name         | Standard Name |
| YCR024C-A                                        | PMP1          | YML057W                 | CMP2          |
| YBR171W                                          | SEC66         | YNL041C                 | COG6          |
| YBR108W                                          | YBR108W       | YHR200W                 | RPN10         |
| YPL234C                                          | TFP3          | YNL041C                 | COG6          |
| YLR170C                                          | APS1          | YHL019C                 | APM2          |
| YMR224C                                          | MRE11         | YER122C                 | GLO3          |
| YGL237C                                          | HAP2          | YEL053C                 | MAK10         |
| YHR134W                                          | WSS1          | YOL030W                 | GAS5          |
| YCR020C-A                                        | MAK31         | YJL053W                 | PEP8          |
| YKL048C                                          | ELM1          | YER122C                 | GLO3          |
| YLR288C                                          | MEC3          | YGL148W                 | ARO2          |
| YBR200W                                          | BEM1          | YMR311C                 | GLC8          |
| YLR079W                                          | SIC1          | YKR061W                 | KTR2          |
| YKR059W                                          | TIF1          | YGL019W                 | CKB1          |
| YKR099W                                          | BAS1          | YER040W                 | GLN3          |
| YBR131W                                          | CCZ1          | YGR135W                 | PRE9          |
| YER114C                                          | BOI2          | YDR309C                 | GIC2          |
| YOR112W                                          | CEX1          | YCR066W                 | RAD18         |
| YPL024W                                          | RMI1          | YNL076W                 | MKS1          |
| YMR142C                                          | RPL13B        | YHR200W                 | RPN10         |
| YKR099W                                          | BAS1          | YDL192W                 | ARF1          |
| YAR014C                                          | BUD14         | YDR207C                 | UME6          |
| YML115C                                          | VAN1          | YEL060C                 | PRB1          |
| YCL037C                                          | SRO9          | YER120W                 | SCS2          |
| YGR275W                                          | RTT102        | YOR290C                 | SNF2          |
| YOL018C                                          | TLG2          | YDR207C                 | UME6          |
| YJL154C                                          | VPS35         | YGR261C                 | APL6          |
| YFR036W                                          | CDC26         | YML071C                 | COG8          |
| YDR329C                                          | PEX3          | YDR142C                 | PEX7          |



| Predictions at threshold level 0.80 continued... |               |                         |               |
|--------------------------------------------------|---------------|-------------------------|---------------|
| Gene1 of predicted pair                          |               | Gene2 of predicted pair |               |
| Systematic Name                                  | Standard Name | Systematic Name         | Standard Name |
| YMR224C                                          | MRE11         | YKR095W                 | MLP1          |
| YDR080W                                          | VPS41         | YGL124C                 | MON1          |
| YHR156C                                          | LIN1          | YER044C                 | ERG28         |
| YBR278W                                          | DPB3          | YBR274W                 | CHK1          |
| YLR337C                                          | VRP1          | YKL126W                 | YPK1          |
| YFR031C-A                                        | RPL2A         | YPL234C                 | TFP3          |
| YKL101W                                          | HSL1          | YGL031C                 | RPL24A        |
| YHR013C                                          | ARD1          | YPR046W                 | MCM16         |
| YHR156C                                          | LIN1          | YPL195W                 | APL5          |
| YKL139W                                          | CTK1          | YNL225C                 | CNM67         |
| YNL248C                                          | RPA49         | YGR270W                 | YTA7          |
| YJL154C                                          | VPS35         | YBR260C                 | RGD1          |
| YDR004W                                          | RAD57         | YJR090C                 | GRR1          |
| YLR192C                                          | HCR1          | YLR398C                 | SKI2          |
| YMR016C                                          | SOK2          | YPL161C                 | BEM4          |
| YOR106W                                          | VAM3          | YER096W                 | SHC1          |
| YMR095C                                          | SNO1          | YPL037C                 | EGD1          |
| YLR064W                                          | YLR064W       | YHR114W                 | BZZ1          |
| YHR111W                                          | UBA4          | YNL079C                 | TPM1          |
| YHR060W                                          | VMA22         | YNL076W                 | MKS1          |
| YGL066W                                          | SGF73         | YJR135C                 | MCM22         |
| YBR290W                                          | BSD2          | YAL002W                 | VPS8          |
| YJL124C                                          | LSM1          | YOL090W                 | MSH2          |
| YHR178W                                          | STB5          | YPL253C                 | VIK1          |
| YBL058W                                          | SHP1          | YDR477W                 | SNF1          |
| YNL058C                                          | YNL058C       | YOR066W                 | MSA1          |
| YDR174W                                          | HMO1          | YHR013C                 | ARD1          |
| YDR254W                                          | CHL4          | YDR318W                 | MCM21         |
| YGL060W                                          | YBP2          | YPR131C                 | NAT3          |

| Predictions at threshold level 0.80 continued... |               |                         |               |
|--------------------------------------------------|---------------|-------------------------|---------------|
| Gene1 of predicted pair                          |               | Gene2 of predicted pair |               |
| Systematic Name                                  | Standard Name | Systematic Name         | Standard Name |
| YPR084W                                          | YPR084W       | YPL037C                 | EGD1          |
| YOL111C                                          | MDY2          | YPL137C                 | GIP3          |
| YGL115W                                          | SNF4          | YOR327C                 | SNC2          |
| YEL065W                                          | SIT1          | YOR337W                 | TEA1          |
| YBR173C                                          | UMP1          | YKR035W-A               | DID2          |
| YJR056C                                          | YJR056C       | YBL085W                 | BOI1          |
| YBR108W                                          | YBR108W       | YMR230W                 | RPS10B        |
| YNL215W                                          | IES2          | YPL253C                 | VIK1          |
| YGL212W                                          | VAM7          | YNL076W                 | MKS1          |
| YOR358W                                          | HAP5          | YPL246C                 | RBD2          |
| YMR026C                                          | PEX12         | YEL053C                 | MAK10         |
| YJR056C                                          | YJR056C       | YMR152W                 | YIM1          |
| YBL088C                                          | TEL1          | YPR072W                 | NOT5          |
| YDR443C                                          | SSN2          | YKR099W                 | BAS1          |
| YPR120C                                          | CLB5          | YLR425W                 | TUS1          |
| YFR031C-A                                        | RPL2A         | YEL051W                 | VMA8          |
| YLR313C                                          | SPH1          | YLR362W                 | STE11         |
| YER162C                                          | RAD4          | YGL124C                 | MON1          |
| YOR195W                                          | SLK19         | YMR202W                 | ERG2          |
| YMR205C                                          | PFK2          | YPL161C                 | BEM4          |
| YDR309C                                          | GIC2          | YGR152C                 | RSR1          |
| YAR014C                                          | BUD14         | YKR030W                 | GMH1          |
| YHR012W                                          | VPS29         | YLR371W                 | ROM2          |
| YDR108W                                          | GSG1          | YHR012W                 | VPS29         |
| YGL133W                                          | ITC1          | YDR363W-A               | SEM1          |
| YOR080W                                          | DIA2          | YGL031C                 | RPL24A        |
| YPL120W                                          | VPS30         | YNL051W                 | COG5          |
| YGL178W                                          | MPT5          | YNL271C                 | BNI1          |
| YPR017C                                          | DSS4          | YEL053C                 | MAK10         |

| Predictions at threshold level 0.80 continued... |               |                         |               |
|--------------------------------------------------|---------------|-------------------------|---------------|
| Gene1 of predicted pair                          |               | Gene2 of predicted pair |               |
| Systematic Name                                  | Standard Name | Systematic Name         | Standard Name |
| YDR137W                                          | RGP1          | YDL192W                 | ARF1          |
| YNL218W                                          | MGS1          | YLR313C                 | SPH1          |
| YGR081C                                          | SLX9          | YFL023W                 | BUD27         |
| YNL243W                                          | SLA2          | YLR200W                 | YKE2          |
| YJL124C                                          | LSM1          | YDR076W                 | RAD55         |
| YBR200W                                          | BEM1          | YLR399C                 | BDF1          |
| YJR005W                                          | APL1          | YDL226C                 | GCS1          |
| YNL069C                                          | RPL16B        | YOR106W                 | VAM3          |
| YGR105W                                          | VMA21         | YLR309C                 | IMH1          |
| YDR176W                                          | NGG1          | YOR023C                 | AHC1          |
| YBL051C                                          | PIN4          | YIL008W                 | URM1          |
| YGR104C                                          | SRB5          | YBR200W                 | BEM1          |
| YDR335W                                          | MSN5          | YNL236W                 | SIN4          |
| YBR031W                                          | RPL4A         | YOR078W                 | BUD21         |
| YKR035W-A                                        | DID2          | YLR180W                 | SAM1          |
| YOR327C                                          | SNC2          | YGL124C                 | MON1          |
| YMR016C                                          | SOK2          | YLR093C                 | NYV1          |
| YBR260C                                          | RGD1          | YHR114W                 | BZZ1          |
| YER087C-B                                        | SBH1          | YJR010C-A               | SPC1          |
| YOL111C                                          | MDY2          | YLR180W                 | SAM1          |
| YJR135C                                          | MCM22         | YCR086W                 | CSM1          |
| YMR055C                                          | BUB2          | YJL187C                 | SWE1          |
| YER115C                                          | SPR6          | YCR024C-A               | PMP1          |
| YBL047C                                          | EDE1          | YOR043W                 | WHI2          |
| YMR319C                                          | FET4          | YDR105C                 | TMS1          |
| YCL037C                                          | SRO9          | YHL020C                 | OPI1          |
| YLR095C                                          | IOC2          | YNL058C                 | YNL058C       |
| YNR072W                                          | HXT17         | YDL077C                 | VAM6          |
| YOR270C                                          | VPH1          | YGL124C                 | MON1          |

| Predictions at threshold level 0.80 continued... |               |                         |               |
|--------------------------------------------------|---------------|-------------------------|---------------|
| Gene1 of predicted pair                          |               | Gene2 of predicted pair |               |
| Systematic Name                                  | Standard Name | Systematic Name         | Standard Name |
| YFL026W                                          | STE2          | YJR125C                 | ENT3          |
| YLR135W                                          | SLX4          | YMR038C                 | CCS1          |
| YJL151C                                          | SNA3          | YBR108W                 | YBR108W       |
| YLR083C                                          | EMP70         | YCR020C-A               | MAK31         |
| YGL174W                                          | BUD13         | YER161C                 | SPT2          |
| YOR327C                                          | SNC2          | YLR370C                 | ARC18         |
| YDR358W                                          | GGA1          | YDL077C                 | VAM6          |
| YKL110C                                          | KTI12         | YCR086W                 | CSM1          |
| YHR111W                                          | UBA4          | YDR155C                 | CPR1          |
| YLR216C                                          | CPR6          | YBL103C                 | RTG3          |
| YMR054W                                          | STV1          | YKL119C                 | VPH2          |
| YOR195W                                          | SLK19         | YLR381W                 | CTF3          |
| YNL058C                                          | YNL058C       | YPL195W                 | APL5          |
| YER162C                                          | RAD4          | YNL076W                 | MKS1          |
| YDR129C                                          | SAC6          | YDR323C                 | PEP7          |
| YGR270W                                          | YTA7          | YDR144C                 | MKC7          |
| YDR363W-A                                        | SEM1          | YDL155W                 | CLB3          |
| YCR066W                                          | RAD18         | YPL120W                 | VPS30         |
| YGR108W                                          | CLB1          | YOL091W                 | SPO21         |
| YOR096W                                          | RPS7A         | YBR189W                 | RPS9B         |
| YPL018W                                          | CTF19         | YOR141C                 | ARP8          |
| YGL156W                                          | AMS1          | YKL103C                 | LAP4          |
| YBR290W                                          | BSD2          | YER115C                 | SPR6          |
| YHR161C                                          | YAP1801       | YKR001C                 | VPS1          |
| YKL116C                                          | PRR1          | YMR152W                 | YIM1          |
| YKL214C                                          | YRA2          | YOR001W                 | RRP6          |
| YIL076W                                          | SEC28         | YDL083C                 | RPS16B        |
| YOR008C                                          | SLG1          | YJL095W                 | BCK1          |
| YDR129C                                          | SAC6          | YEL036C                 | ANP1          |

| Predictions at threshold level 0.80 continued... |               |                         |               |
|--------------------------------------------------|---------------|-------------------------|---------------|
| Gene1 of predicted pair                          |               | Gene2 of predicted pair |               |
| Systematic Name                                  | Standard Name | Systematic Name         | Standard Name |
| YER011W                                          | TIR1          | YPL178W                 | CBC2          |
| YHR200W                                          | RPN10         | YLR032W                 | RAD5          |
| YOR112W                                          | CEX1          | YHL020C                 | OPI1          |
| YAL024C                                          | LTE1          | YFR036W                 | CDC26         |
| YLR180W                                          | SAM1          | YDR207C                 | UME6          |
| YAL024C                                          | LTE1          | YDR383C                 | NKP1          |
| YPR017C                                          | DSS4          | YDL077C                 | VAM6          |
| YDL160C                                          | DHH1          | YOR368W                 | RAD17         |
| YER143W                                          | DDI1          | YNR049C                 | MSO1          |
| YGR104C                                          | SRB5          | YNL215W                 | IES2          |
| YOR101W                                          | RAS1          | YDL005C                 | MED2          |
| YJL036W                                          | SNX4          | YDR080W                 | VPS41         |
| YLR043C                                          | TRX1          | YIL008W                 | URM1          |
| YJL187C                                          | SWE1          | YJL095W                 | BCK1          |
| YAL024C                                          | LTE1          | YMR311C                 | GLC8          |
| YOR337W                                          | TEA1          | YJR084W                 | CSN12         |
| YPL120W                                          | VPS30         | YOR327C                 | SNC2          |
| YJR063W                                          | RPA12         | YOL081W                 | IRA2          |
| YDR443C                                          | SSN2          | YML071C                 | COG8          |
| YNL041C                                          | COG6          | YPL120W                 | VPS30         |
| YGL212W                                          | VAM7          | YLR452C                 | SST2          |
| YCR053W                                          | THR4          | YBR280C                 | SAF1          |
| YBR171W                                          | SEC66         | YOR035C                 | SHE4          |
| YJL124C                                          | LSM1          | YKR001C                 | VPS1          |
| YBL051C                                          | PIN4          | YKL048C                 | ELM1          |
| YMR055C                                          | BUB2          | YJL138C                 | TIF2          |
| YMR311C                                          | GLC8          | YMR230W                 | RPS10B        |
| YFR010W                                          | UBP6          | YOR035C                 | SHE4          |
| YGR249W                                          | MGA1          | YDR261C                 | EXG2          |

| Predictions at threshold level 0.80 continued... |               |                         |               |
|--------------------------------------------------|---------------|-------------------------|---------------|
| Gene1 of predicted pair                          |               | Gene2 of predicted pair |               |
| Systematic Name                                  | Standard Name | Systematic Name         | Standard Name |
| YHR098C                                          | SFB3          | YOR036W                 | PEP12         |
| YKR035W-A                                        | DID2          | YJR032W                 | CPR7          |
| YGR252W                                          | GCN5          | YNL236W                 | SIN4          |
| YGL250W                                          | RMR1          | YPL018W                 | CTF19         |
| YJR063W                                          | RPA12         | YDR183W                 | PLP1          |
| YAL024C                                          | LTE1          | YPL253C                 | VIK1          |
| YJL172W                                          | CPS1          | YER139C                 | YER139C       |
| YGL033W                                          | HOP2          | YDR207C                 | UME6          |
| YEL065W                                          | SIT1          | YBR108W                 | YBR108W       |
| YGR072W                                          | UPF3          | YOL108C                 | INO4          |
| YIL034C                                          | CAP2          | YLR233C                 | EST1          |
| YBL058W                                          | SHP1          | YDL077C                 | VAM6          |
| YLR254C                                          | NDL1          | YNL116W                 | DMA2          |
| YJR024C                                          | MDE1          | YMR164C                 | MSS11         |
| YCR065W                                          | HCM1          | YOR080W                 | DIA2          |
| YOR023C                                          | AHC1          | YHL002W                 | HSE1          |
| YCL001W                                          | RER1          | YAL002W                 | VPS8          |
| YLR192C                                          | HCR1          | YBR036C                 | CSG2          |
| YAR014C                                          | BUD14         | YPR119W                 | CLB2          |
| YKR020W                                          | VPS51         | YJR032W                 | CPR7          |
| YGL135W                                          | RPL1B         | YGR133W                 | PEX4          |
| YLR386W                                          | VAC14         | YCR086W                 | CSM1          |
| YIL076W                                          | SEC28         | YPL234C                 | TFP3          |
| YMR116C                                          | ASC1          | YML115C                 | VAN1          |
| YJL095W                                          | BCK1          | YJL190C                 | RPS22A        |
| YOR039W                                          | CKB2          | YGL250W                 | RMR1          |
| YIL103W                                          | DPH1          | YAR014C                 | BUD14         |
| YGL147C                                          | RPL9A         | YIL076W                 | SEC28         |
| YKL116C                                          | PRR1          | YGL212W                 | VAM7          |

| Predictions at threshold level 0.80 continued... |               |                         |               |
|--------------------------------------------------|---------------|-------------------------|---------------|
| Gene1 of predicted pair                          |               | Gene2 of predicted pair |               |
| Systematic Name                                  | Standard Name | Systematic Name         | Standard Name |
| YDL192W                                          | ARF1          | YLR370C                 | ARC18         |
| YKR072C                                          | SIS2          | YLR313C                 | SPH1          |
| YBR194W                                          | SOY1          | YOR001W                 | RRP6          |
| YPL253C                                          | VIK1          | YDR318W                 | MCM21         |
| YOR080W                                          | DIA2          | YDR378C                 | LSM6          |
| YGL087C                                          | MMS2          | YGL253W                 | HXK2          |
| YKL048C                                          | ELM1          | YGR270W                 | YTA7          |
| YDR176W                                          | NGG1          | YLR357W                 | RSC2          |
| YBR171W                                          | SEC66         | YLR447C                 | VMA6          |
| YHR086W                                          | NAM8          | YBR119W                 | MUD1          |
| YIL159W                                          | BNR1          | YDL192W                 | ARF1          |
| YCR081W                                          | SRB8          | YOR014W                 | RTS1          |
| YGL095C                                          | VPS45         | YOR327C                 | SNC2          |
| YDR320C                                          | SWA2          | YHL031C                 | GOS1          |
| YNL325C                                          | FIG4          | YDR137W                 | RGP1          |
| YOR066W                                          | MSA1          | YMR311C                 | GLC8          |
| YKL032C                                          | IXR1          | YJL183W                 | MNN11         |
| YOR066W                                          | MSA1          | YDR261C                 | EXG2          |
| YLR360W                                          | VPS38         | YNL107W                 | YAF9          |
| YMR142C                                          | RPL13B        | YDR358W                 | GGA1          |
| YLR119W                                          | SRN2          | YKR099W                 | BAS1          |
| YBR217W                                          | ATG12         | YMR016C                 | SOK2          |
| YLR150W                                          | STM1          | YJR135C                 | MCM22         |
| YOR106W                                          | VAM3          | YHR060W                 | VMA22         |
| YJR005W                                          | APL1          | YPR046W                 | MCM16         |
| YLR135W                                          | SLX4          | YDL013W                 | SLX5          |
| YLR119W                                          | SRN2          | YPR036W                 | VMA13         |
| YHR111W                                          | UBA4          | YHR114W                 | BZZ1          |
| YFR043C                                          | IRC6          | YMR243C                 | ZRC1          |

| Predictions at threshold level 0.80 continued... |               |                         |               |
|--------------------------------------------------|---------------|-------------------------|---------------|
| Gene1 of predicted pair                          |               | Gene2 of predicted pair |               |
| Systematic Name                                  | Standard Name | Systematic Name         | Standard Name |
| YJL095W                                          | BCK1          | YDR310C                 | SUM1          |
| YLR234W                                          | TOP3          | YOR127W                 | RGA1          |
| YPR072W                                          | NOT5          | YLR357W                 | RSC2          |
| YBL008W                                          | HIR1          | YCR086W                 | CSM1          |
| YNL215W                                          | IES2          | YML112W                 | CTK3          |
| YLR119W                                          | SRN2          | YMR311C                 | GLC8          |
| YJL020C                                          | BBC1          | YGL095C                 | VPS45         |
| YJR063W                                          | RPA12         | YNL116W                 | DMA2          |
| YGL066W                                          | SGF73         | YDL013W                 | SLX5          |
| YOR033C                                          | EXO1          | YCR077C                 | PAT1          |
| YPL057C                                          | SUR1          | YPL195W                 | APL5          |
| YBR173C                                          | UMP1          | YGL025C                 | PGD1          |
| YDR484W                                          | VPS52         | YBL103C                 | RTG3          |
| YBR217W                                          | ATG12         | YDL083C                 | RPS16B        |
| YGL087C                                          | MMS2          | YJL124C                 | LSM1          |
| YLL007C                                          | YLL007C       | YJL154C                 | VPS35         |
| YLR109W                                          | AHP1          | YER042W                 | MXR1          |
| YJL183W                                          | MNN11         | YJL190C                 | RPS22A        |
| YLR095C                                          | IOC2          | YML115C                 | VAN1          |
| YCL067C                                          | HMLALPHA2     | YPL240C                 | HSP82         |
| YLR090W                                          | XDJ1          | YBL103C                 | RTG3          |
| YML103C                                          | NUP188        | YKL048C                 | ELM1          |
| YMR106C                                          | YKU80         | YML028W                 | TSA1          |
| YFR031C-A                                        | RPL2A         | YPR046W                 | MCM16         |
| YDR469W                                          | SDC1          | YDR155C                 | CPR1          |
| YPR046W                                          | MCM16         | YDR155C                 | CPR1          |
| YFR010W                                          | UBP6          | YML028W                 | TSA1          |
| YCR034W                                          | FEN1          | YGL250W                 | RMR1          |
| YDR477W                                          | SNF1          | YPL256C                 | CLN2          |



| Predictions at threshold level 0.80 continued... |               |                         |               |
|--------------------------------------------------|---------------|-------------------------|---------------|
| Gene1 of predicted pair                          |               | Gene2 of predicted pair |               |
| Systematic Name                                  | Standard Name | Systematic Name         | Standard Name |
| YOR127W                                          | RGA1          | YDL006W                 | PTC1          |
| YJL029C                                          | VPS53         | YGL095C                 | VPS45         |
| YHL031C                                          | GOS1          | YNL041C                 | COG6          |
| YHR013C                                          | ARD1          | YDR183W                 | PLP1          |
| YER116C                                          | SLX8          | YLR410W                 | VIP1          |
| YNL307C                                          | MCK1          | YML071C                 | COG8          |
| YPL240C                                          | HSP82         | YER100W                 | UBC6          |
| YDR225W                                          | HTA1          | YNR072W                 | HXT17         |
| YNL206C                                          | RTT106        | YEL056W                 | HAT2          |
| YPL161C                                          | BEM4          | YDL192W                 | ARF1          |
| YBR260C                                          | RGD1          | YJL095W                 | BCK1          |
| YHR052W                                          | CIC1          | YLR150W                 | STM1          |
| YKL110C                                          | KTI12         | YBL071W-A               | KTI11         |
| YHR160C                                          | PEX18         | YLR191W                 | PEX13         |
| YIL159W                                          | BNR1          | YDR137W                 | RGP1          |
| YPL129W                                          | TAF14         | YNL031C                 | HHT2          |
| YPL050C                                          | MNN9          | YOR035C                 | SHE4          |
| YHL031C                                          | GOS1          | YJL004C                 | SYS1          |
| YDR004W                                          | RAD57         | YMR231W                 | PEP5          |
| YDR318W                                          | MCM21         | YGL003C                 | CDH1          |
| YIL036W                                          | CST6          | YNL307C                 | MCK1          |
| YEL053C                                          | MAK10         | YEL056W                 | HAT2          |
| YBL008W                                          | HIR1          | YMR167W                 | MLH1          |
| YGR249W                                          | MGA1          | YMR214W                 | SCJ1          |
| YPR072W                                          | NOT5          | YDR071C                 | PAA1          |
| YNL307C                                          | MCK1          | YML028W                 | TSA1          |
| YDR245W                                          | MNN10         | YDR456W                 | NHX1          |
| YHR039C-A                                        | VMA10         | YOR038C                 | HIR2          |
| YBR200W                                          | BEM1          | YBL103C                 | RTG3          |

| Predictions at threshold level 0.80 continued... |               |                         |               |
|--------------------------------------------------|---------------|-------------------------|---------------|
| Gene1 of predicted pair                          |               | Gene2 of predicted pair |               |
| Systematic Name                                  | Standard Name | Systematic Name         | Standard Name |
| YLR292C                                          | SEC72         | YMR055C                 | BUB2          |
| YDR293C                                          | SSD1          | YOR127W                 | RGA1          |
| YLR192C                                          | HCR1          | YLR370C                 | ARC18         |
| YNL307C                                          | MCK1          | YOL111C                 | MDY2          |
| YGL178W                                          | MPT5          | YCR009C                 | RVS161        |
| YLR093C                                          | NYV1          | YML071C                 | COG8          |
| YPL253C                                          | VIK1          | YGR270W                 | YTA7          |
| YPR120C                                          | CLB5          | YKL161C                 | YKL161C       |
| YOR132W                                          | VPS17         | YPL037C                 | EGD1          |
| YOL044W                                          | PEX15         | YAL055W                 | PEX22         |
| YPR029C                                          | APL4          | YJR125C                 | ENT3          |
| YGL212W                                          | VAM7          | YCL037C                 | SRO9          |
| YNL291C                                          | MID1          | YPR120C                 | CLB5          |
| YDR225W                                          | HTA1          | YLR381W                 | CTF3          |
| YFR031C-A                                        | RPL2A         | YGL223C                 | COG1          |
| YMR080C                                          | NAM7          | YNL218W                 | MGS1          |
| YDR309C                                          | GIC2          | YOR327C                 | SNC2          |
| YJR135C                                          | MCM22         | YJR032W                 | CPR7          |
| YJL183W                                          | MNN11         | YLR233C                 | EST1          |
| YCR077C                                          | PAT1          | YLR350W                 | ORM2          |
| YMR224C                                          | MRE11         | YBR228W                 | SLX1          |
| YER116C                                          | SLX8          | YHR013C                 | ARD1          |
| YLR337C                                          | VRP1          | YPL050C                 | MNN9          |
| YDL184C                                          | RPL41A        | YBR200W                 | BEM1          |
| YNR072W                                          | HXT17         | YOR043W                 | WHI2          |
| YBL071W-A                                        | KTI11         | YIL103W                 | DPH1          |
| YOL111C                                          | MDY2          | YKR035W-A               | DID2          |
| YOR043W                                          | WHI2          | YDR469W                 | SDC1          |
| YJL127C                                          | SPT10         | YJL124C                 | LSM1          |

| Predictions at threshold level 0.80 continued... |               |                         |               |
|--------------------------------------------------|---------------|-------------------------|---------------|
| Gene1 of predicted pair                          |               | Gene2 of predicted pair |               |
| Systematic Name                                  | Standard Name | Systematic Name         | Standard Name |
| YAL024C                                          | LTE1          | YDR335W                 | MSN5          |
| YPL018W                                          | CTF19         | YKL114C                 | APN1          |
| YLR119W                                          | SRN2          | YPR046W                 | MCM16         |
| YDR080W                                          | VPS41         | YHR060W                 | VMA22         |
| YBR107C                                          | IML3          | YDR254W                 | CHL4          |
| YIL156W                                          | UBP7          | YNL199C                 | GCR2          |
| YJR060W                                          | CBF1          | YHR012W                 | VPS29         |
| YDL083C                                          | RPS16B        | YHR081W                 | LRP1          |
| YHR156C                                          | LIN1          | YLR398C                 | SKI2          |
| YBR042C                                          | CST26         | YGL215W                 | CLG1          |
| YLR254C                                          | NDL1          | YAR014C                 | BUD14         |
| YER114C                                          | BOI2          | YBR200W                 | BEM1          |
| YJL172W                                          | CPS1          | YNL041C                 | COG6          |
| YOR043W                                          | WHI2          | YHR158C                 | KEL1          |
| YJL176C                                          | SWI3          | YGR275W                 | RTT102        |
| YBR194W                                          | SOY1          | YPL018W                 | CTF19         |
| YDR443C                                          | SSN2          | YPL042C                 | SSN3          |
| YOR043W                                          | WHI2          | YBR280C                 | SAF1          |
| YLR079W                                          | SIC1          | YPR046W                 | MCM16         |
| YKL025C                                          | PAN3          | YBL021C                 | HAP3          |
| YNL054W                                          | VAC7          | YGR188C                 | BUB1          |
| YDR295C                                          | HDA2          | YDR318W                 | MCM21         |
| YPL024W                                          | RMI1          | YMR055C                 | BUB2          |
| YOR290C                                          | SNF2          | YML001W                 | YPT7          |
| YLL007C                                          | YLL007C       | YOL067C                 | RTG1          |
| YKR099W                                          | BAS1          | YLR370C                 | ARC18         |
| YBR127C                                          | VMA2          | YKL041W                 | VPS24         |
| YIL053W                                          | RHR2          | YML071C                 | COG8          |
| YDR379W                                          | RGA2          | YHR111W                 | UBA4          |

| Predictions at threshold level 0.80 continued... |               |                         |               |
|--------------------------------------------------|---------------|-------------------------|---------------|
| Gene1 of predicted pair                          |               | Gene2 of predicted pair |               |
| Systematic Name                                  | Standard Name | Systematic Name         | Standard Name |
| YFR036W                                          | CDC26         | YGL003C                 | CDH1          |
| YCR086W                                          | CSM1          | YEL056W                 | HAT2          |
| YER144C                                          | UBP5          | YOR035C                 | SHE4          |
| YMR224C                                          | MRE11         | YMR199W                 | CLN1          |
| YGL033W                                          | HOP2          | YMR153W                 | NUP53         |
| YNL069C                                          | RPL16B        | YKR030W                 | GMH1          |
| YLR094C                                          | GIS3          | YDR358W                 | GGA1          |
| YDR245W                                          | MNN10         | YGL200C                 | EMP24         |
| YKL025C                                          | PAN3          | YPL161C                 | BEM4          |
| YKL139W                                          | CTK1          | YKR099W                 | BAS1          |
| YFR010W                                          | UBP6          | YDR261C                 | EXG2          |
| YPL057C                                          | SUR1          | YHR077C                 | NMD2          |
| YMR080C                                          | NAM7          | YBR228W                 | SLX1          |
| YJL154C                                          | VPS35         | YEL043W                 | YEL043W       |
| YFR010W                                          | UBP6          | YGL163C                 | RAD54         |
| YDR108W                                          | GSG1          | YBR131W                 | CCZ1          |
| YPR046W                                          | MCM16         | YMR214W                 | SCJ1          |
| YFR010W                                          | UBP6          | YBR020W                 | GAL1          |
| YOR014W                                          | RTS1          | YLR182W                 | SWI6          |
| YKL139W                                          | CTK1          | YBR107C                 | IML3          |
| YOR023C                                          | AHC1          | YJR032W                 | CPR7          |
| YGL133W                                          | ITC1          | YKL048C                 | ELM1          |
| YGL174W                                          | BUD13         | YGR270W                 | YTA7          |
| YNL289W                                          | PCL1          | YHR115C                 | DMA1          |
| YHL027W                                          | RIM101        | YPR173C                 | VPS4          |
| YPL137C                                          | GIP3          | YBR019C                 | GAL10         |
| YPL024W                                          | RMI1          | YER044C                 | ERG28         |
| YLR234W                                          | TOP3          | YBR114W                 | RAD16         |
| YNL325C                                          | FIG4          | YNL238W                 | KEX2          |

| Predictions at threshold level 0.80 continued... |               |                         |               |
|--------------------------------------------------|---------------|-------------------------|---------------|
| Gene1 of predicted pair                          |               | Gene2 of predicted pair |               |
| Systematic Name                                  | Standard Name | Systematic Name         | Standard Name |
| YLR288C                                          | MEC3          | YER161C                 | SPT2          |
| YJL060W                                          | BNA3          | YJR060W                 | CBF1          |
| YGL147C                                          | RPL9A         | YLR320W                 | MMS22         |
| YDR378C                                          | LSM6          | YKL110C                 | KTI12         |
| YGR108W                                          | CLB1          | YHL002W                 | HSE1          |
| YDR318W                                          | MCM21         | YNL107W                 | YAF9          |
| YBR107C                                          | IML3          | YHL002W                 | HSE1          |
| YDR264C                                          | AKR1          | YJR086W                 | STE18         |
| YNL215W                                          | IES2          | YAL002W                 | VPS8          |
| YGR104C                                          | SRB5          | YDR477W                 | SNF1          |
| YDL020C                                          | RPN4          | YGR081C                 | SLX9          |
| YJL053W                                          | PEP8          | YAR014C                 | BUD14         |
| YEL053C                                          | MAK10         | YLR180W                 | SAM1          |
| YBR194W                                          | SOY1          | YMR038C                 | CCS1          |
| YNL031C                                          | HHT2          | YOR064C                 | YNG1          |
| YGL095C                                          | VPS45         | YOR036W                 | PEP12         |
| YPL240C                                          | HSP82         | YJL184W                 | GON7          |
| YDR108W                                          | GSG1          | YDR153C                 | ENT5          |
| YOR112W                                          | CEX1          | YPL234C                 | TFP3          |
| YOR043W                                          | WHI2          | YNL076W                 | MKS1          |
| YDL020C                                          | RPN4          | YNL307C                 | MCK1          |
| YOR043W                                          | WHI2          | YBR019C                 | GAL10         |
| YGR019W                                          | UGA1          | YDR293C                 | SSD1          |
| YDL116W                                          | NUP84         | YGL163C                 | RAD54         |
| YHL027W                                          | RIM101        | YJL095W                 | BCK1          |
| YMR284W                                          | YKU70         | YOR080W                 | DIA2          |
| YML097C                                          | VPS9          | YMR089C                 | YTA12         |
| YPL057C                                          | SUR1          | YGL003C                 | CDH1          |
| YDR213W                                          | UPC2          | YMR070W                 | MOT3          |

| Predictions at threshold level 0.80 continued... |               |                         |               |
|--------------------------------------------------|---------------|-------------------------|---------------|
| Gene1 of predicted pair                          |               | Gene2 of predicted pair |               |
| Systematic Name                                  | Standard Name | Systematic Name         | Standard Name |
| YDR358W                                          | GGA1          | YOL081W                 | IRA2          |
| YML117W                                          | NAB6          | YBR082C                 | UBC4          |
| YJL136C                                          | RPS21B        | YKR048C                 | NAP1          |
| YDR484W                                          | VPS52         | YML001W                 | YPT7          |
| YMR224C                                          | MRE11         | YDR260C                 | SWM1          |
| YNL041C                                          | COG6          | YLR398C                 | SKI2          |
| YDL042C                                          | SIR2          | YLR399C                 | BDF1          |
| YGR270W                                          | YTA7          | YLR350W                 | ORM2          |
| YDR080W                                          | VPS41         | YCR066W                 | RAD18         |
| YGR054W                                          | YGR054W       | YGL253W                 | HXK2          |
| YGL025C                                          | PGD1          | YBR171W                 | SEC66         |
| YKL129C                                          | MYO3          | YOR035C                 | SHE4          |
| YMR026C                                          | PEX12         | YBR280C                 | SAF1          |
| YDL116W                                          | NUP84         | YHR111W                 | UBA4          |
| YPR017C                                          | DSS4          | YCL001W                 | RER1          |
| YPR036W                                          | VMA13         | YOL121C                 | RPS19A        |
| YBR173C                                          | UMP1          | YDL223C                 | HBT1          |
| YBL102W                                          | SFT2          | YLR360W                 | VPS38         |
| YLR386W                                          | VAC14         | YFR036W                 | CDC26         |
| YHR156C                                          | LIN1          | YMR214W                 | SCJ1          |
| YDR080W                                          | VPS41         | YPR032W                 | SRO7          |
| YOR038C                                          | HIR2          | YER139C                 | YER139C       |
| YLR192C                                          | HCR1          | YBR082C                 | UBC4          |
| YOR290C                                          | SNF2          | YKR035W-A               | DID2          |
| YNL243W                                          | SLA2          | YDL006W                 | PTC1          |
| YHL031C                                          | GOS1          | YEL036C                 | ANP1          |
| YLR192C                                          | HCR1          | YBR280C                 | SAF1          |
| YNL307C                                          | MCK1          | YLR032W                 | RAD5          |
| YHR134W                                          | WSS1          | YHR167W                 | THP2          |

| Predictions at threshold level 0.80 continued... |               |                         |               |
|--------------------------------------------------|---------------|-------------------------|---------------|
| Gene1 of predicted pair                          |               | Gene2 of predicted pair |               |
| Systematic Name                                  | Standard Name | Systematic Name         | Standard Name |
| YDR329C                                          | PEX3          | YDL065C                 | PEX19         |
| YER161C                                          | SPT2          | YHR039C-A               | VMA10         |
| YLR315W                                          | NKP2          | YNL107W                 | YAF9          |
| YNR072W                                          | HXT17         | YJL183W                 | MNN11         |
| YLR309C                                          | IMH1          | YNR032W                 | PPG1          |
| YJR056C                                          | YJR056C       | YOR043W                 | WHI2          |
| YLR095C                                          | IOC2          | YER144C                 | UBP5          |
| YLR337C                                          | VRP1          | YLR292C                 | SEC72         |
| YOR337W                                          | TEA1          | YPR030W                 | CSR2          |
| YGL124C                                          | MON1          | YER122C                 | GLO3          |
| YML038C                                          | YMD8          | YHR012W                 | VPS29         |
| YLR353W                                          | BUD8          | YOR301W                 | RAX1          |
| YLR119W                                          | SRN2          | YGL078C                 | DBP3          |
| YNL087W                                          | TCB2          | YOR327C                 | SNC2          |
| YDR363W-A                                        | SEM1          | YHR167W                 | THP2          |
| YNL079C                                          | TPM1          | YPR119W                 | CLB2          |
| YIL053W                                          | RHR2          | YBR173C                 | UMP1          |
| YJL176C                                          | SWI3          | YBR082C                 | UBC4          |
| YFR036W                                          | CDC26         | YNL076W                 | MKS1          |
| YNL215W                                          | IES2          | YDR335W                 | MSN5          |
| YMR224C                                          | MRE11         | YOR213C                 | SAS5          |
| YHR073W                                          | OSH3          | YPL178W                 | CBC2          |
| YLR320W                                          | MMS22         | YDR261C                 | EXG2          |
| YDR108W                                          | GSG1          | YKL119C                 | VPH2          |
| YER116C                                          | SLX8          | YDR318W                 | MCM21         |
| YMR152W                                          | YIM1          | YNL076W                 | MKS1          |
| YML038C                                          | YMD8          | YJR033C                 | RAV1          |
| YDR378C                                          | LSM6          | YKR026C                 | GCN3          |
| YJL124C                                          | LSM1          | YBR215W                 | HPC2          |

| Predictions at threshold level 0.80 continued... |               |                         |               |
|--------------------------------------------------|---------------|-------------------------|---------------|
| Gene1 of predicted pair                          |               | Gene2 of predicted pair |               |
| Systematic Name                                  | Standard Name | Systematic Name         | Standard Name |
| YNL218W                                          | MGS1          | YOR076C                 | SKI7          |
| YER096W                                          | SHC1          | YLR425W                 | TUS1          |
| YKL160W                                          | ELF1          | YLR306W                 | UBC12         |
| YMR038C                                          | CCS1          | YGL031C                 | RPL24A        |
| YJL176C                                          | SWI3          | YGR072W                 | UPF3          |
| YKL025C                                          | PAN3          | YJR032W                 | CPR7          |
| YGL147C                                          | RPL9A         | YLR370C                 | ARC18         |
| YGR108W                                          | CLB1          | YLR429W                 | CRN1          |
| YIL053W                                          | RHR2          | YEL060C                 | PRB1          |
| YDR443C                                          | SSN2          | YOR066W                 | MSA1          |
| YDL077C                                          | VAM6          | YLR309C                 | IMH1          |
| YPL158C                                          | YPL158C       | YJL095W                 | BCK1          |
| YGL087C                                          | MMS2          | YLR032W                 | RAD5          |
| YBL051C                                          | PIN4          | YGR270W                 | YTA7          |
| YDR071C                                          | PAA1          | YNL107W                 | YAF9          |
| YPR084W                                          | YPR084W       | YCR077C                 | PAT1          |
| YEL053C                                          | MAK10         | YEL043W                 | YEL043W       |
| YDR080W                                          | VPS41         | YKR001C                 | VPS1          |
| YBR200W                                          | BEM1          | YPL057C                 | SUR1          |
| YDR443C                                          | SSN2          | YOL051W                 | GAL11         |
| YML095C                                          | RAD10         | YJL190C                 | RPS22A        |
| YGL060W                                          | YBP2          | YLR381W                 | CTF3          |
| YLR150W                                          | STM1          | YHR200W                 | RPN10         |
| YOR109W                                          | INP53         | YPR032W                 | SRO7          |
| YJR059W                                          | PTK2          | YMR199W                 | CLN1          |
| YDL101C                                          | DUN1          | YCR086W                 | CSM1          |
| YDR245W                                          | MNN10         | YOR275C                 | RIM20         |
| YLR094C                                          | GIS3          | YJR032W                 | CPR7          |
| YPL195W                                          | APL5          | YPL120W                 | VPS30         |



| Predictions at threshold level 0.80 continued... |               |                         |               |
|--------------------------------------------------|---------------|-------------------------|---------------|
| Gene1 of predicted pair                          |               | Gene2 of predicted pair |               |
| Systematic Name                                  | Standard Name | Systematic Name         | Standard Name |
| YMR095C                                          | SNO1          | YHR060W                 | VMA22         |
| YMR109W                                          | MYO5          | YHL027W                 | RIM101        |
| YOL126C                                          | MDH2          | YML057W                 | CMP2          |
| YNR052C                                          | POP2          | YDR378C                 | LSM6          |
| YKL048C                                          | ELM1          | YDR144C                 | MKC7          |
| YLR094C                                          | GIS3          | YOR066W                 | MSA1          |
| YNL051W                                          | COG5          | YAL002W                 | VPS8          |
| YMR055C                                          | BUB2          | YKL101W                 | HSL1          |
| YIL050W                                          | PCL7          | YPL219W                 | PCL8          |
| YLR381W                                          | CTF3          | YKR061W                 | KTR2          |
| YPL024W                                          | RMI1          | YBR194W                 | SOY1          |
| YBR260C                                          | RGD1          | YOR035C                 | SHE4          |
| YNL031C                                          | HHT2          | YEL056W                 | HAT2          |
| YKL048C                                          | ELM1          | YLR410W                 | VIP1          |
| YFL023W                                          | BUD27         | YER044C                 | ERG28         |
| YPL022W                                          | RAD1          | YER116C                 | SLX8          |
| YMR224C                                          | MRE11         | YDL192W                 | ARF1          |
| YKL139W                                          | CTK1          | YNL116W                 | DMA2          |
| YBR111W-A                                        | SUS1          | YOL148C                 | SPT20         |
| YGL066W                                          | SGF73         | YPL161C                 | BEM4          |
| YBR107C                                          | IML3          | YJL190C                 | RPS22A        |
| YGR104C                                          | SRB5          | YKL139W                 | CTK1          |
| YNL325C                                          | FIG4          | YDR484W                 | VPS52         |
| YJR032W                                          | CPR7          | YDR183W                 | PLP1          |
| YNL215W                                          | IES2          | YBR215W                 | HPC2          |
| YOR145C                                          | PNO1          | YKL143W                 | LTV1          |
| YDL116W                                          | NUP84         | YOR358W                 | HAP5          |
| YMR224C                                          | MRE11         | YFR036W                 | CDC26         |
| YPR131C                                          | NAT3          | YDR207C                 | UME6          |

| Predictions at threshold level 0.80 continued... |               |                         |               |
|--------------------------------------------------|---------------|-------------------------|---------------|
| Gene1 of predicted pair                          |               | Gene2 of predicted pair |               |
| Systematic Name                                  | Standard Name | Systematic Name         | Standard Name |
| YBR200W                                          | BEM1          | YER162C                 | RAD4          |
| YML103C                                          | NUP188        | YBR017C                 | KAP104        |
| YKR069W                                          | MET1          | YKL129C                 | MYO3          |
| YNL291C                                          | MID1          | YPR051W                 | MAK3          |
| YOR253W                                          | NAT5          | YHR013C                 | ARD1          |
| YBR057C                                          | MUM2          | YGL212W                 | VAM7          |
| YGL066W                                          | SGF73         | YGR252W                 | GCN5          |
| YBR041W                                          | FAT1          | YBL101C                 | ECM21         |
| YDR146C                                          | SWI5          | YFR034C                 | PHO4          |
| YDR108W                                          | GSG1          | YAL002W                 | VPS8          |
| YLR095C                                          | IOC2          | YGL115W                 | SNF4          |
| YDL116W                                          | NUP84         | YNL307C                 | MCK1          |
| YEL053C                                          | MAK10         | YDL006W                 | PTC1          |
| YEL050C                                          | RML2          | YDR378C                 | LSM6          |
| YIL076W                                          | SEC28         | YDR080W                 | VPS41         |
| YHR156C                                          | LIN1          | YOL081W                 | IRA2          |
| YDR156W                                          | RPA14         | YKL048C                 | ELM1          |
| YDR137W                                          | RGP1          | YPL234C                 | TFP3          |
| YNL307C                                          | MCK1          | YOR312C                 | RPL20B        |
| YDL122W                                          | UBP1          | YJR099W                 | YUH1          |
| YBL008W                                          | HIR1          | YGR108W                 | CLB1          |
| YGL147C                                          | RPL9A         | YMR230W                 | RPS10B        |
| YMR116C                                          | ASC1          | YBL047C                 | EDE1          |
| YLR083C                                          | EMP70         | YLR309C                 | IMH1          |
| YDR320C                                          | SWA2          | YKR001C                 | VPS1          |
| YNL288W                                          | CAF40         | YDR310C                 | SUM1          |
| YKL032C                                          | IXR1          | YCR077C                 | PAT1          |
| YGL161C                                          | YIP5          | YML097C                 | VPS9          |
| YOR141C                                          | ARP8          | YLR182W                 | SWI6          |

| Predictions at threshold level 0.80 continued... |               |                         |               |
|--------------------------------------------------|---------------|-------------------------|---------------|
| Gene1 of predicted pair                          |               | Gene2 of predicted pair |               |
| Systematic Name                                  | Standard Name | Systematic Name         | Standard Name |
| YPL256C                                          | CLN2          | YJR090C                 | GRR1          |
| YML095C                                          | RAD10         | YKR048C                 | NAP1          |
| YNL243W                                          | SLA2          | YBL061C                 | SKT5          |
| YKR035W-A                                        | DID2          | YJR084W                 | CSN12         |
| YER179W                                          | DMC1          | YNL230C                 | ELA1          |
| YDR293C                                          | SSD1          | YPL037C                 | EGD1          |
| YML115C                                          | VAN1          | YGL200C                 | EMP24         |
| YLR288C                                          | MEC3          | YDR289C                 | RTT103        |
| YHR052W                                          | CIC1          | YGL246C                 | RAI1          |
| YBL051C                                          | PIN4          | YMR055C                 | BUB2          |
| YDR484W                                          | VPS52         | YHR060W                 | VMA22         |
| YIL159W                                          | BNR1          | YDL184C                 | RPL41A        |
| YCR065W                                          | HCM1          | YPR119W                 | CLB2          |
| YMR224C                                          | MRE11         | YNL248C                 | RPA49         |
| YGR252W                                          | GCN5          | YHR108W                 | GGA2          |
| YDR137W                                          | RGP1          | YPL037C                 | EGD1          |
| YOR127W                                          | RGA1          | YNL206C                 | RTT106        |
| YBL058W                                          | SHP1          | YBR280C                 | SAF1          |
| YLR192C                                          | HCR1          | YJL183W                 | MNN11         |
| YIL034C                                          | CAP2          | YBR108W                 | YBR108W       |
| YOR083W                                          | WHI5          | YMR055C                 | BUB2          |
| YJL053W                                          | PEP8          | YDL161W                 | ENT1          |
| YER162C                                          | RAD4          | YJL095W                 | BCK1          |
| YJR060W                                          | CBF1          | YMR054W                 | STV1          |
| YLR135W                                          | SLX4          | YML028W                 | TSA1          |
| YLR315W                                          | NKP2          | YER139C                 | YER139C       |
| YHR060W                                          | VMA22         | YHR012W                 | VPS29         |
| YML016C                                          | PPZ1          | YJR060W                 | CBF1          |
| YKL139W                                          | CTK1          | YMR214W                 | SCJ1          |

| Predictions at threshold level 0.80 continued... |               |                         |               |
|--------------------------------------------------|---------------|-------------------------|---------------|
| Gene1 of predicted pair                          |               | Gene2 of predicted pair |               |
| Systematic Name                                  | Standard Name | Systematic Name         | Standard Name |
| YLR090W                                          | XDJ1          | YLR398C                 | SKI2          |
| YDR443C                                          | SSN2          | YPL024W                 | RMI1          |
| YJR056C                                          | YJR056C       | YPR046W                 | MCM16         |
| YDR004W                                          | RAD57         | YMR055C                 | BUB2          |
| YPL140C                                          | MKK2          | YJL095W                 | BCK1          |
| YHR108W                                          | GGA2          | YHR158C                 | KEL1          |
| YLR119W                                          | SRN2          | YKL116C                 | PRR1          |
| YNL206C                                          | RTT106        | YGR252W                 | GCN5          |
| YDR443C                                          | SSN2          | YNL307C                 | MCK1          |
| YPR036W                                          | VMA13         | YDR261C                 | EXG2          |
| YLR148W                                          | PEP3          | YAL002W                 | VPS8          |
| YJL053W                                          | PEP8          | YNR032W                 | PPG1          |
| YDR484W                                          | VPS52         | YOR327C                 | SNC2          |
| YDR071C                                          | PAA1          | YGR135W                 | PRE9          |
| YMR127C                                          | SAS2          | YGR188C                 | BUB1          |
| YIL053W                                          | RHR2          | YNL087W                 | TCB2          |
| YDR176W                                          | NGG1          | YNL236W                 | SIN4          |
| YNL215W                                          | IES2          | YNL199C                 | GCR2          |
| YPL253C                                          | VIK1          | YBR107C                 | IML3          |
| YFR010W                                          | UBP6          | YNL032W                 | SIW14         |
| YBR108W                                          | YBR108W       | YKR035W-A               | DID2          |
| YGL163C                                          | RAD54         | YJR035W                 | RAD26         |
| YOR141C                                          | ARP8          | YNL107W                 | YAF9          |
| YNL032W                                          | SIW14         | YKL126W                 | YPK1          |
| YGR105W                                          | VMA21         | YJR032W                 | CPR7          |
| YHR134W                                          | WSS1          | YJR135C                 | MCM22         |
| YDR477W                                          | SNF1          | YBR010W                 | HHT1          |
| YKR020W                                          | VPS51         | YCR077C                 | PAT1          |
| YMR127C                                          | SAS2          | YPR051W                 | MAK3          |

| Predictions at threshold level 0.80 continued... |               |                         |               |
|--------------------------------------------------|---------------|-------------------------|---------------|
| Gene1 of predicted pair                          |               | Gene2 of predicted pair |               |
| Systematic Name                                  | Standard Name | Systematic Name         | Standard Name |
| YCL001W                                          | RER1          | YDL077C                 | VAM6          |
| YNL032W                                          | SIW14         | YMR152W                 | YIM1          |
| YDR293C                                          | SSD1          | YPL018W                 | CTF19         |
| YGL054C                                          | ERV14         | YNL107W                 | YAF9          |
| YDR392W                                          | SPT3          | YGL178W                 | MPT5          |
| YKR072C                                          | SIS2          | YEL056W                 | HAT2          |
| YOR127W                                          | RGA1          | YGL054C                 | ERV14         |
| YOR083W                                          | WHI5          | YDR171W                 | HSP42         |
| YNL206C                                          | RTT106        | YKL074C                 | MUD2          |
| YDR137W                                          | RGP1          | YDR440W                 | DOT1          |
| YDR379W                                          | RGA2          | YKR048C                 | NAP1          |
| YGL124C                                          | MON1          | YMR311C                 | GLC8          |
| YBR217W                                          | ATG12         | YLL042C                 | ATG10         |
| YGR252W                                          | GCN5          | YKL160W                 | ELF1          |
| YDR293C                                          | SSD1          | YJL183W                 | MNN11         |
| YDR202C                                          | RAV2          | YPL105C                 | YPL105C       |
| YOR069W                                          | VPS5          | YNL127W                 | FAR11         |
| YHR060W                                          | VMA22         | YEL051W                 | VMA8          |
| YPL037C                                          | EGD1          | YEL043W                 | YEL043W       |
| YNL307C                                          | MCK1          | YNL082W                 | PMS1          |
| YDR335W                                          | MSN5          | YDR183W                 | PLP1          |
| YMR224C                                          | MRE11         | YGL115W                 | SNF4          |
| YDR320C                                          | SWA2          | YGL223C                 | COG1          |
| YGL033W                                          | HOP2          | YLR371W                 | ROM2          |
| YDL116W                                          | NUP84         | YNL199C                 | GCR2          |
| YGL175C                                          | SAE2          | YGL163C                 | RAD54         |
| YIL159W                                          | BNR1          | YGL003C                 | CDH1          |
| YHR111W                                          | UBA4          | YDR310C                 | SUM1          |
| YDR383C                                          | NKP1          | YDR183W                 | PLP1          |

| Predictions at threshold level 0.80 continued... |               |                         |               |
|--------------------------------------------------|---------------|-------------------------|---------------|
| Gene1 of predicted pair                          |               | Gene2 of predicted pair |               |
| Systematic Name                                  | Standard Name | Systematic Name         | Standard Name |
| YMR142C                                          | RPL13B        | YBR200W                 | BEM1          |
| YGL200C                                          | EMP24         | YBL047C                 | EDE1          |
| YDR477W                                          | SNF1          | YGL212W                 | VAM7          |
| YGR204W                                          | ADE3          | YEL046C                 | GLY1          |
| YKL161C                                          | YKL161C       | YHR158C                 | KEL1          |
| YBR020W                                          | GAL1          | YNL004W                 | HRB1          |
| YGL060W                                          | YBP2          | YOR080W                 | DIA2          |
| YMR224C                                          | MRE11         | YGL033W                 | HOP2          |
| YKL116C                                          | PRR1          | YER122C                 | GLO3          |
| YJL154C                                          | VPS35         | YBL102W                 | SFT2          |
| YGR019W                                          | UGA1          | YEL053C                 | MAK10         |
| YHR060W                                          | VMA22         | YNL127W                 | FAR11         |
| YDR144C                                          | MKC7          | YNL107W                 | YAF9          |
| YGL147C                                          | RPL9A         | YDL192W                 | ARF1          |
| YML103C                                          | NUP188        | YKR095W                 | MLP1          |
| YDR363W-A                                        | SEM1          | YGL115W                 | SNF4          |
| YJL095W                                          | BCK1          | YCR053W                 | THR4          |
| YKL126W                                          | YPK1          | YJR032W                 | CPR7          |
| YOR140W                                          | SFL1          | YLR425W                 | TUS1          |
| YOR109W                                          | INP53         | YPL161C                 | BEM4          |
| YBL103C                                          | RTG3          | YPL161C                 | BEM4          |
| YGL153W                                          | PEX14         | YJL006C                 | CTK2          |
| YJR032W                                          | CPR7          | YBR036C                 | CSG2          |
| YBR108W                                          | YBR108W       | YJR056C                 | YJR056C       |
| YDR477W                                          | SNF1          | YFL023W                 | BUD27         |
| YHR167W                                          | THP2          | YHR077C                 | NMD2          |
| YBL008W                                          | HIR1          | YOL091W                 | SPO21         |
| YAL024C                                          | LTE1          | YHR158C                 | KEL1          |
| YPL096C-A                                        | ERI1          | YDL223C                 | HBT1          |

| Predictions at threshold level 0.80 continued... |               |                         |               |
|--------------------------------------------------|---------------|-------------------------|---------------|
| Gene1 of predicted pair                          |               | Gene2 of predicted pair |               |
| Systematic Name                                  | Standard Name | Systematic Name         | Standard Name |
| YLR216C                                          | CPR6          | YNL307C                 | MCK1          |
| YEL043W                                          | YEL043W       | YPL120W                 | VPS30         |
| YCR084C                                          | TUP1          | YNL236W                 | SIN4          |
| YBR173C                                          | UMP1          | YKL048C                 | ELM1          |
| YDR443C                                          | SSN2          | YML001W                 | YPT7          |
| YDR383C                                          | NKP1          | YNL116W                 | DMA2          |
| YAL024C                                          | LTE1          | YGL163C                 | RAD54         |
| YGL223C                                          | COG1          | YHR060W                 | VMA22         |
| YOR337W                                          | TEA1          | YBR200W                 | BEM1          |
| YMR095C                                          | SNO1          | YDR477W                 | SNF1          |
| YPL057C                                          | SUR1          | YKR035W-A               | DID2          |
| YER116C                                          | SLX8          | YKL101W                 | HSL1          |
| YDL002C                                          | NHP10         | YAL002W                 | VPS8          |
| YLR371W                                          | ROM2          | YER162C                 | RAD4          |
| YKL204W                                          | EAP1          | YDR310C                 | SUM1          |
| YPR120C                                          | CLB5          | YGL003C                 | CDH1          |
| YER116C                                          | SLX8          | YJR090C                 | GRR1          |
| YLR381W                                          | CTF3          | YNL307C                 | MCK1          |
| YKR072C                                          | SIS2          | YNR052C                 | POP2          |
| YLR119W                                          | SRN2          | YOR327C                 | SNC2          |
| YBR194W                                          | SOY1          | YLR381W                 | CTF3          |
| YPL024W                                          | RMI1          | YER040W                 | GLN3          |
| YDR080W                                          | VPS41         | YDL006W                 | PTC1          |
| YDR245W                                          | MNN10         | YGL212W                 | VAM7          |
| YIL076W                                          | SEC28         | YEL051W                 | VMA8          |
| YNL288W                                          | CAF40         | YBR107C                 | IML3          |
| YJL154C                                          | VPS35         | YPL161C                 | BEM4          |
| YOR001W                                          | RRP6          | YDR335W                 | MSN5          |
| YLR381W                                          | CTF3          | YGL252C                 | RTG2          |

| Predictions at threshold level 0.80 continued... |               |                         |               |
|--------------------------------------------------|---------------|-------------------------|---------------|
| Gene1 of predicted pair                          |               | Gene2 of predicted pair |               |
| Systematic Name                                  | Standard Name | Systematic Name         | Standard Name |
| YDL020C                                          | RPN4          | YBR215W                 | HPC2          |
| YML016C                                          | PPZ1          | YJR135C                 | MCM22         |
| YDL116W                                          | NUP84         | YMR164C                 | MSS11         |
| YBR108W                                          | YBR108W       | YNL166C                 | BNI5          |
| YAL024C                                          | LTE1          | YJL183W                 | MNN11         |
| YJR084W                                          | CSN12         | YLR032W                 | RAD5          |
| YIL034C                                          | CAP2          | YAR014C                 | BUD14         |
| YDR289C                                          | RTT103        | YOL081W                 | IRA2          |
| YGR241C                                          | YAP1802       | YNR006W                 | VPS27         |
| YDR254W                                          | CHL4          | YLR182W                 | SWI6          |
| YGL174W                                          | BUD13         | YBR215W                 | HPC2          |
| YLR192C                                          | HCR1          | YKR020W                 | VPS51         |
| YNL032W                                          | SIW14         | YOL121C                 | RPS19A        |
| YLR386W                                          | VAC14         | YDL184C                 | RPL41A        |
| YGL054C                                          | ERV14         | YPL234C                 | TFP3          |
| YBL102W                                          | SFT2          | YKR020W                 | VPS51         |
| YDR484W                                          | VPS52         | YPL195W                 | APL5          |
| YEL053C                                          | MAK10         | YGL253W                 | HXK2          |
| YGL066W                                          | SGF73         | YNL307C                 | MCK1          |
| YDR378C                                          | LSM6          | YDL226C                 | GCS1          |
| YNL297C                                          | MON2          | YJR040W                 | GEF1          |
| YBR050C                                          | REG2          | YER027C                 | GAL83         |
| YGL133W                                          | ITC1          | YBL087C                 | RPL23A        |
| YHL031C                                          | GOS1          | YPL050C                 | MNN9          |
| YOR290C                                          | SNF2          | YKL126W                 | YPK1          |
| YGL124C                                          | MON1          | YBR036C                 | CSG2          |
| YOR290C                                          | SNF2          | YPL161C                 | BEM4          |
| YIL034C                                          | CAP2          | YPL253C                 | VIK1          |
| YOR270C                                          | VPH1          | YPL137C                 | GIP3          |



| Predictions at threshold level 0.80 continued... |               |                         |               |
|--------------------------------------------------|---------------|-------------------------|---------------|
| Gene1 of predicted pair                          |               | Gene2 of predicted pair |               |
| Systematic Name                                  | Standard Name | Systematic Name         | Standard Name |
| YAL024C                                          | LTE1          | YBR036C                 | CSG2          |
| YMR224C                                          | MRE11         | YOR043W                 | WHI2          |
| YBR171W                                          | SEC66         | YFR036W                 | CDC26         |
| YHR200W                                          | RPN10         | YCR053W                 | THR4          |
| YNL199C                                          | GCR2          | YMR125W                 | STO1          |
| YGL115W                                          | SNF4          | YDL083C                 | RPS16B        |
| YBR217W                                          | ATG12         | YPL161C                 | BEM4          |
| YGL212W                                          | VAM7          | YPR046W                 | MCM16         |
| YLR337C                                          | VRP1          | YGR135W                 | PRE9          |
| YIL034C                                          | CAP2          | YPL018W                 | CTF19         |
| YPL253C                                          | VIK1          | YER049W                 | TPA1          |
| YFR031C-A                                        | RPL2A         | YOR043W                 | WHI2          |
| YFR031C-A                                        | RPL2A         | YJL154C                 | VPS35         |
| YOR337W                                          | TEA1          | YNL076W                 | MKS1          |
| YGR270W                                          | YTA7          | YDR155C                 | CPR1          |
| YDR439W                                          | LRS4          | YHR013C                 | ARD1          |
| YHL031C                                          | GOS1          | YMR038C                 | CCS1          |
| YMR273C                                          | ZDS1          | YFL047W                 | RGD2          |
| YJL053W                                          | PEP8          | YKR030W                 | GMH1          |
| YNL238W                                          | KEX2          | YJL140W                 | RPB4          |
| YDR448W                                          | ADA2          | YDR469W                 | SDC1          |
| YML071C                                          | COG8          | YMR214W                 | SCJ1          |
| YOR132W                                          | VPS17         | YGL115W                 | SNF4          |
| YLR064W                                          | YLR064W       | YPL246C                 | RBD2          |
| YDR363W-A                                        | SEM1          | YER139C                 | YER139C       |
| YDR108W                                          | GSG1          | YER120W                 | SCS2          |
| YOL067C                                          | RTG1          | YBR114W                 | RAD16         |
| YDR293C                                          | SSD1          | YKR020W                 | VPS51         |
| YDR335W                                          | MSN5          | YPR046W                 | MCM16         |

| Predictions at threshold level 0.80 continued... |               |                         |               |
|--------------------------------------------------|---------------|-------------------------|---------------|
| Gene1 of predicted pair                          |               | Gene2 of predicted pair |               |
| Systematic Name                                  | Standard Name | Systematic Name         | Standard Name |
| YLR386W                                          | VAC14         | YOR066W                 | MSA1          |
| YGR108W                                          | CLB1          | YDL047W                 | SIT4          |
| YPL057C                                          | SUR1          | YDR289C                 | RTT103        |
| YKR048C                                          | NAP1          | YLR182W                 | SWI6          |
| YOR033C                                          | EXO1          | YMR199W                 | CLN1          |
| YFR010W                                          | UBP6          | YKL126W                 | YPK1          |
| YGR270W                                          | YTA7          | YAL002W                 | VPS8          |
| YOL126C                                          | MDH2          | YBL079W                 | NUP170        |
| YLL007C                                          | YLL007C       | YML095C                 | RAD10         |
| YBR108W                                          | YBR108W       | YDR484W                 | VPS52         |
| YLR018C                                          | POM34         | YBL079W                 | NUP170        |
| YFR031C-A                                        | RPL2A         | YDL192W                 | ARF1          |
| YHR144C                                          | DCD1          | YMR201C                 | RAD14         |
| YDR363W-A                                        | SEM1          | YBL087C                 | RPL23A        |
| YJR063W                                          | RPA12         | YDR071C                 | PAA1          |
| YLR396C                                          | VPS33         | YPL045W                 | VPS16         |
| YJR090C                                          | GRR1          | YGL252C                 | RTG2          |
| YLR093C                                          | NYV1          | YBR036C                 | CSG2          |
| YGL095C                                          | VPS45         | YDR323C                 | PEP7          |
| YPL256C                                          | CLN2          | YGL031C                 | RPL24A        |
| YGR020C                                          | VMA7          | YDR153C                 | ENT5          |
| YBR042C                                          | CST26         | YGR105W                 | VMA21         |
| YDR363W-A                                        | SEM1          | YDR260C                 | SWM1          |
| YOR076C                                          | SKI7          | YOR145C                 | PNO1          |
| YBR194W                                          | SOY1          | YDL226C                 | GCS1          |
| YHR013C                                          | ARD1          | YNL238W                 | KEX2          |
| YML071C                                          | COG8          | YCR053W                 | THR4          |
| YOR023C                                          | AHC1          | YPL161C                 | BEM4          |
| YHR134W                                          | WSS1          | YGL151W                 | NUT1          |

| Predictions at threshold level 0.80 continued... |               |                         |               |
|--------------------------------------------------|---------------|-------------------------|---------------|
| Gene1 of predicted pair                          |               | Gene2 of predicted pair |               |
| Systematic Name                                  | Standard Name | Systematic Name         | Standard Name |
| YDL184C                                          | RPL41A        | YPR030W                 | CSR2          |
| YJL036W                                          | SNX4          | YJR060W                 | CBF1          |
| YNL107W                                          | YAF9          | YOL081W                 | IRA2          |
| YBR215W                                          | HPC2          | YDR335W                 | MSN5          |
| YEL060C                                          | PRB1          | YMR230W                 | RPS10B        |
| YBR131W                                          | CCZ1          | YGR105W                 | VMA21         |
| YLR079W                                          | SIC1          | YML057W                 | CMP2          |
| YNL032W                                          | SIW14         | YDL192W                 | ARF1          |
| YGL178W                                          | MPT5          | YDL056W                 | MBP1          |
| YPL253C                                          | VIK1          | YAR014C                 | BUD14         |
| YLR234W                                          | TOP3          | YML103C                 | NUP188        |
| YMR127C                                          | SAS2          | YFR036W                 | CDC26         |
| YBR278W                                          | DPB3          | YBR036C                 | CSG2          |
| YML103C                                          | NUP188        | YDR254W                 | CHL4          |
| YHR205W                                          | SCH9          | YPL161C                 | BEM4          |
| YOR035C                                          | SHE4          | YJR084W                 | CSN12         |
| YLR371W                                          | ROM2          | YEL036C                 | ANP1          |
| YBR107C                                          | IML3          | YFR030W                 | MET10         |
| YDL101C                                          | DUN1          | YCR066W                 | RAD18         |
| YPR018W                                          | RLF2          | YPR131C                 | NAT3          |
| YOR127W                                          | RGA1          | YOR112W                 | CEX1          |
| YJL136C                                          | RPS21B        | YML095C                 | RAD10         |
| YOR035C                                          | SHE4          | YBR181C                 | RPS6B         |
| YOR337W                                          | TEA1          | YER116C                 | SLX8          |
| YMR216C                                          | SKY1          | YDL077C                 | VAM6          |
| YDL184C                                          | RPL41A        | YOL111C                 | MDY2          |
| YPL037C                                          | EGD1          | YPL105C                 | YPL105C       |
| YER001W                                          | MNN1          | YMR089C                 | YTA12         |
| YDR379W                                          | RGA2          | YGL038C                 | OCH1          |

| Predictions at threshold level 0.80 continued... |               |                         |               |
|--------------------------------------------------|---------------|-------------------------|---------------|
| Gene1 of predicted pair                          |               | Gene2 of predicted pair |               |
| Systematic Name                                  | Standard Name | Systematic Name         | Standard Name |
| YKL006W                                          | RPL14A        | YJL095W                 | BCK1          |
| YJR032W                                          | CPR7          | YJL190C                 | RPS22A        |
| YNR064C                                          | YNR064C       | YOR344C                 | TYE7          |
| YBR111W-A                                        | SUS1          | YMR273C                 | ZDS1          |
| YHR156C                                          | LIN1          | YMR230W                 | RPS10B        |
| YKL135C                                          | APL2          | YJR005W                 | APL1          |
| YKR048C                                          | NAP1          | YPL256C                 | CLN2          |
| YMR142C                                          | RPL13B        | YJL172W                 | CPS1          |
| YDR174W                                          | HMO1          | YCR086W                 | CSM1          |
| YLR435W                                          | TSR2          | YKL101W                 | HSL1          |
| YPL137C                                          | GIP3          | YMR214W                 | SCJ1          |
| YMR026C                                          | PEX12         | YNL032W                 | SIW14         |
| YMR216C                                          | SKY1          | YOL108C                 | INO4          |
| YOR069W                                          | VPS5          | YKR030W                 | GMH1          |
| YOR112W                                          | CEX1          | YDR153C                 | ENT5          |
| YLR234W                                          | TOP3          | YBR194W                 | SOY1          |
| YJL124C                                          | LSM1          | YFR030W                 | MET10         |
| YLR079W                                          | SIC1          | YPL152W                 | RRD2          |
| YFR010W                                          | UBP6          | YLR386W                 | VAC14         |
| YCR065W                                          | HCM1          | YNL236W                 | SIN4          |
| YNL116W                                          | DMA2          | YLR182W                 | SWI6          |
| YKL126W                                          | YPK1          | YHR200W                 | RPN10         |
| YKL139W                                          | CTK1          | YDR261C                 | EXG2          |
| YLR381W                                          | CTF3          | YJR135C                 | MCM22         |
| YGR241C                                          | YAP1802       | YLR206W                 | ENT2          |
| YBR274W                                          | CHK1          | YCR086W                 | CSM1          |
| YNL291C                                          | MID1          | YGL163C                 | RAD54         |
| YGL124C                                          | MON1          | YNL076W                 | MKS1          |
| YMR133W                                          | REC114        | YNL238W                 | KEX2          |

| Predictions at threshold level 0.80 continued... |               |                         |               |
|--------------------------------------------------|---------------|-------------------------|---------------|
| Gene1 of predicted pair                          |               | Gene2 of predicted pair |               |
| Systematic Name                                  | Standard Name | Systematic Name         | Standard Name |
| YNL215W                                          | IES2          | YPL152W                 | RRD2          |
| YNL325C                                          | FIG4          | YPR036W                 | VMA13         |
| YML103C                                          | NUP188        | YOR358W                 | HAP5          |
| YDR260C                                          | SWM1          | YLR032W                 | RAD5          |
| YGL212W                                          | VAM7          | YOL108C                 | INO4          |
| YLR441C                                          | RPS1A         | YNL076W                 | MKS1          |
| YML115C                                          | VAN1          | YGL025C                 | PGD1          |
| YGL178W                                          | MPT5          | YBR231C                 | SWC5          |
| YDR477W                                          | SNF1          | YDL184C                 | RPL41A        |
| YJR056C                                          | YJR056C       | YBR019C                 | GAL10         |
| YPL057C                                          | SUR1          | YDR207C                 | UME6          |
| YGL060W                                          | YBP2          | YJR035W                 | RAD26         |
| YMR198W                                          | CIK1          | YML095C                 | RAD10         |
| YJL172W                                          | CPS1          | YOR066W                 | MSA1          |
| YPR017C                                          | DSS4          | YPR051W                 | MAK3          |
| YPL018W                                          | CTF19         | YHR114W                 | BZZ1          |
| YLR386W                                          | VAC14         | YFL023W                 | BUD27         |
| YNL069C                                          | RPL16B        | YOL108C                 | INO4          |
| YBR057C                                          | MUM2          | YGL200C                 | EMP24         |
| YDR137W                                          | RGP1          | YCL037C                 | SRO9          |
| YNL032W                                          | SIW14         | YDL083C                 | RPS16B        |
| YGR019W                                          | UGA1          | YDR310C                 | SUM1          |
| YKR035W-A                                        | DID2          | YDL077C                 | VAM6          |
| YOR001W                                          | RRP6          | YER063W                 | THO1          |
| YGL133W                                          | ITC1          | YHR200W                 | RPN10         |
| YFL013C                                          | IES1          | YOR001W                 | RRP6          |
| YEL050C                                          | RML2          | YDR254W                 | CHL4          |
| YBR057C                                          | MUM2          | YER001W                 | MNN1          |
| YBL058W                                          | SHP1          | YPR046W                 | MCM16         |

| Predictions at threshold level 0.80 continued... |               |                         |               |
|--------------------------------------------------|---------------|-------------------------|---------------|
| Gene1 of predicted pair                          |               | Gene2 of predicted pair |               |
| Systematic Name                                  | Standard Name | Systematic Name         | Standard Name |
| YOR337W                                          | TEA1          | YFR010W                 | UBP6          |
| YHR013C                                          | ARD1          | YLR410W                 | VIP1          |
| YJR140C                                          | HIR3          | YCR031C                 | RPS14A        |
| YIL159W                                          | BNR1          | YLR371W                 | ROM2          |
| YPL022W                                          | RAD1          | YOL090W                 | MSH2          |
| YMR216C                                          | SKY1          | YHL020C                 | OPI1          |
| YHR039C-A                                        | VMA10         | YBR036C                 | CSG2          |
| YLR090W                                          | XDJ1          | YNL076W                 | MKS1          |
| YLR292C                                          | SEC72         | YPL253C                 | VIK1          |
| YJR063W                                          | RPA12         | YLR357W                 | RSC2          |
| YER144C                                          | UBP5          | YER139C                 | YER139C       |
| YPL152W                                          | RRD2          | YJL006C                 | CTK2          |
| YDL020C                                          | RPN4          | YGR135W                 | PRE9          |
| YMR004W                                          | MVP1          | YJR033C                 | RAV1          |
| YBL058W                                          | SHP1          | YEL060C                 | PRB1          |
| YCR086W                                          | CSM1          | YMR038C                 | CCS1          |
| YMR026C                                          | PEX12         | YAL055W                 | PEX22         |
| YLR192C                                          | HCR1          | YLR180W                 | SAM1          |
| YML071C                                          | COG8          | YLR180W                 | SAM1          |
| YJL154C                                          | VPS35         | YLR371W                 | ROM2          |
| YLR090W                                          | XDJ1          | YOR043W                 | WHI2          |
| YDL083C                                          | RPS16B        | YOR066W                 | MSA1          |
| YBR131W                                          | CCZ1          | YMR054W                 | STV1          |
| YLR337C                                          | VRP1          | YGR019W                 | UGA1          |
| YER110C                                          | KAP123        | YPL018W                 | CTF19         |
| YJR135C                                          | MCM22         | YJL183W                 | MNN11         |
| YML115C                                          | VAN1          | YPR119W                 | CLB2          |
| YGR054W                                          | YGR054W       | YJL095W                 | BCK1          |
| YMR198W                                          | CIK1          | YOR080W                 | DIA2          |

| Predictions at threshold level 0.80 continued... |               |                         |               |
|--------------------------------------------------|---------------|-------------------------|---------------|
| Gene1 of predicted pair                          |               | Gene2 of predicted pair |               |
| Systematic Name                                  | Standard Name | Systematic Name         | Standard Name |
| YML109W                                          | ZDS2          | YHR061C                 | GIC1          |
| YBR030W                                          | YBR030W       | YDR261C                 | EXG2          |
| YDR004W                                          | RAD57         | YFL003C                 | MSH4          |
| YOR069W                                          | VPS5          | YER120W                 | SCS2          |
| YMR004W                                          | MVP1          | YGL054C                 | ERV14         |
| YPR084W                                          | YPR084W       | YPL234C                 | TFP3          |
| YJR135C                                          | MCM22         | YIL103W                 | DPH1          |
| YPR141C                                          | KAR3          | YHR056C                 | RSC30         |
| YOR005C                                          | DNL4          | YGL090W                 | LIF1          |
| YDR146C                                          | SWI5          | YER096W                 | SHC1          |
| YLR102C                                          | APC9          | YGL163C                 | RAD54         |
| YOR127W                                          | RGA1          | YMR199W                 | CLN1          |
| YPL057C                                          | SUR1          | YML071C                 | COG8          |
| YJL154C                                          | VPS35         | YPR032W                 | SRO7          |
| YDR507C                                          | GIN4          | YDR264C                 | AKR1          |
| YOL090W                                          | MSH2          | YML028W                 | TSA1          |
| YBR108W                                          | YBR108W       | YJL095W                 | BCK1          |
| YEL053C                                          | MAK10         | YCR086W                 | CSM1          |
| YGL212W                                          | VAM7          | YMR152W                 | YIM1          |
| YJL172W                                          | CPS1          | YGL003C                 | CDH1          |
| YAL021C                                          | CCR4          | YHR056C                 | RSC30         |
| YLR386W                                          | VAC14         | YDR137W                 | RGP1          |
| YDR335W                                          | MSN5          | YKL160W                 | ELF1          |
| YJL030W                                          | MAD2          | YGL190C                 | CDC55         |
| YBL103C                                          | RTG3          | YDL223C                 | HBT1          |
| YOL121C                                          | RPS19A        | YGL124C                 | MON1          |
| YJL124C                                          | LSM1          | YLR362W                 | STE11         |
| YML103C                                          | NUP188        | YGR188C                 | BUB1          |
| YNL248C                                          | RPA49         | YFR036W                 | CDC26         |

| Predictions at threshold level 0.80 continued... |               |                         |               |
|--------------------------------------------------|---------------|-------------------------|---------------|
| Gene1 of predicted pair                          |               | Gene2 of predicted pair |               |
| Systematic Name                                  | Standard Name | Systematic Name         | Standard Name |
| YDR378C                                          | LSM6          | YGL115W                 | SNF4          |
| YCL063W                                          | VAC17         | YEL013W                 | VAC8          |
| YKR009C                                          | FOX2          | YOL147C                 | PEX11         |
| YDR293C                                          | SSD1          | YIL076W                 | SEC28         |
| YLR292C                                          | SEC72         | YDL155W                 | CLB3          |
| YNL307C                                          | MCK1          | YMR230W                 | RPS10B        |
| YKR020W                                          | VPS51         | YGL115W                 | SNF4          |
| YAL024C                                          | LTE1          | YDR318W                 | MCM21         |
| YMR004W                                          | MVP1          | YHR012W                 | VPS29         |
| YJR056C                                          | YJR056C       | YDR207C                 | UME6          |
| YLR018C                                          | POM34         | YDR358W                 | GGA1          |
| YLR292C                                          | SEC72         | YPR051W                 | MAK3          |
| YER116C                                          | SLX8          | YOL030W                 | GAS5          |
| YHR171W                                          | ATG7          | YLL042C                 | ATG10         |
| YPL195W                                          | APL5          | YOL108C                 | INO4          |
| YMR153W                                          | NUP53         | YBL079W                 | NUP170        |
| YOR127W                                          | RGA1          | YBR171W                 | SEC66         |
| YLR399C                                          | BDF1          | YFR036W                 | CDC26         |
| YIL053W                                          | RHR2          | YLR371W                 | ROM2          |
| YPL057C                                          | SUR1          | YDR076W                 | RAD55         |
| YKL117W                                          | SBA1          | YNL199C                 | GCR2          |
| YJL029C                                          | VPS53         | YAL030W                 | SNC1          |
| YGL087C                                          | MMS2          | YKR001C                 | VPS1          |
| YGR135W                                          | PRE9          | YOL054W                 | PSH1          |
| YMR313C                                          | TGL3          | YKL140W                 | TGL1          |
| YDL020C                                          | RPN4          | YDR225W                 | HTA1          |
| YGR020C                                          | VMA7          | YJR040W                 | GEF1          |
| YNR072W                                          | HXT17         | YCR053W                 | THR4          |
| YNL307C                                          | MCK1          | YPL037C                 | EGD1          |



| Predictions at threshold level 0.80 continued... |               |                         |               |
|--------------------------------------------------|---------------|-------------------------|---------------|
| Gene1 of predicted pair                          |               | Gene2 of predicted pair |               |
| Systematic Name                                  | Standard Name | Systematic Name         | Standard Name |
| YJL172W                                          | CPS1          | YLR094C                 | GIS3          |
| YJL154C                                          | VPS35         | YDR183W                 | PLP1          |
| YHL031C                                          | GOS1          | YPL120W                 | VPS30         |
| YKR061W                                          | KTR2          | YFR036W                 | CDC26         |
| YIR009W                                          | MSL1          | YPR119W                 | CLB2          |
| YHR012W                                          | VPS29         | YLR309C                 | IMH1          |
| YLR119W                                          | SRN2          | YHR060W                 | VMA22         |
| YLR452C                                          | SST2          | YDR207C                 | UME6          |
| YHR134W                                          | WSS1          | YDL155W                 | CLB3          |
| YGL226C-A                                        | OST5          | YML019W                 | OST6          |
| YOR023C                                          | AHC1          | YGL237C                 | HAP2          |
| YPL246C                                          | RBD2          | YJL004C                 | SYS1          |
| YBR131W                                          | CCZ1          | YLR320W                 | MMS22         |
| YDR443C                                          | SSN2          | YDR146C                 | SWI5          |
| YGL147C                                          | RPL9A         | YPR046W                 | MCM16         |
| YBR200W                                          | BEM1          | YGL003C                 | CDH1          |
| YGR072W                                          | UPF3          | YEL043W                 | YEL043W       |
| YOR069W                                          | VPS5          | YHR012W                 | VPS29         |
| YDL116W                                          | NUP84         | YGL100W                 | SEH1          |
| YEL065W                                          | SIT1          | YHR039C-A               | VMA10         |
| YNL288W                                          | CAF40         | YBL021C                 | HAP3          |
| YFL023W                                          | BUD27         | YJR056C                 | YJR056C       |
| YKR020W                                          | VPS51         | YMR231W                 | PEP5          |
| YGR108W                                          | CLB1          | YNL166C                 | BNI5          |
| YLR006C                                          | SSK1          | YOR127W                 | RGA1          |
| YBR200W                                          | BEM1          | YDR245W                 | MNN10         |
| YMR016C                                          | SOK2          | YLR371W                 | ROM2          |
| YLR182W                                          | SWI6          | YLR350W                 | ORM2          |
| YLR192C                                          | HCR1          | YGL003C                 | CDH1          |

| Predictions at threshold level 0.80 continued... |               |                         |               |
|--------------------------------------------------|---------------|-------------------------|---------------|
| Gene1 of predicted pair                          |               | Gene2 of predicted pair |               |
| Systematic Name                                  | Standard Name | Systematic Name         | Standard Name |
| YKR099W                                          | BAS1          | YJR032W                 | CPR7          |
| YLR386W                                          | VAC14         | YGL115W                 | SNF4          |
| YLR234W                                          | TOP3          | YGR270W                 | YTA7          |
| YNL106C                                          | INP52         | YER096W                 | SHC1          |
| YLR234W                                          | TOP3          | YOR132W                 | VPS17         |
| YML103C                                          | NUP188        | YMR153W                 | NUP53         |
| YHR200W                                          | RPN10         | YDL192W                 | ARF1          |
| YGL174W                                          | BUD13         | YKL160W                 | ELF1          |
| YBR057C                                          | MUM2          | YGR188C                 | BUB1          |
| YDL059C                                          | RAD59         | YBR215W                 | HPC2          |
| YGL060W                                          | YBP2          | YLR079W                 | SIC1          |
| YBL103C                                          | RTG3          | YDR358W                 | GGA1          |
| YGL134W                                          | PCL10         | YPL219W                 | PCL8          |
| YGL124C                                          | MON1          | YGL253W                 | HXK2          |
| YLR083C                                          | EMP70         | YNL127W                 | FAR11         |
| YHR073W                                          | OSH3          | YMR125W                 | STO1          |
| YDR383C                                          | NKP1          | YDR439W                 | LRS4          |
| YML103C                                          | NUP188        | YPL178W                 | CBC2          |
| YML071C                                          | COG8          | YDR153C                 | ENT5          |
| YGR249W                                          | MGA1          | YBR171W                 | SEC66         |
| YPL042C                                          | SSN3          | YDL226C                 | GCS1          |
| YCR081W                                          | SRB8          | YJL154C                 | VPS35         |
| YIL148W                                          | RPL40A        | YCR024C-A               | PMP1          |
| YHL031C                                          | GOS1          | YEL042W                 | GDA1          |
| YHR052W                                          | CIC1          | YKL009W                 | MRT4          |
| YNL041C                                          | COG6          | YOR308C                 | SNU66         |
| YNL044W                                          | YIP3          | YNL041C                 | COG6          |
| YMR224C                                          | MRE11         | YBR280C                 | SAF1          |
| YDR004W                                          | RAD57         | YPL022W                 | RAD1          |

| Predictions at threshold level 0.80 continued... |               |                         |               |
|--------------------------------------------------|---------------|-------------------------|---------------|
| Gene1 of predicted pair                          |               | Gene2 of predicted pair |               |
| Systematic Name                                  | Standard Name | Systematic Name         | Standard Name |
| YBR108W                                          | YBR108W       | YHR111W                 | UBA4          |
| YOR132W                                          | VPS17         | YJR040W                 | GEF1          |
| YGL115W                                          | SNF4          | YEL060C                 | PRB1          |
| YJL172W                                          | CPS1          | YMR152W                 | YIM1          |
| YMR284W                                          | YKU70         | YNL016W                 | PUB1          |
| YDR135C                                          | YCF1          | YGL181W                 | GTS1          |
| YDR443C                                          | SSN2          | YHR039C-A               | VMA10         |
| YCR088W                                          | ABP1          | YJL187C                 | SWE1          |
| YOR156C                                          | NFI1          | YNL078W                 | NIS1          |
| YER115C                                          | SPR6          | YMR125W                 | STO1          |
| YPL024W                                          | RMI1          | YOR368W                 | RAD17         |
| YGR104C                                          | SRB5          | YDR289C                 | RTT103        |
| YJR056C                                          | YJR056C       | YPR036W                 | VMA13         |
| YIL034C                                          | CAP2          | YLR234W                 | TOP3          |
| YDR156W                                          | RPA14         | YMR205C                 | PFK2          |
| YLR090W                                          | XDJ1          | YKR099W                 | BAS1          |
| YMR179W                                          | SPT21         | YJR060W                 | CBF1          |
| YBR200W                                          | BEM1          | YHR081W                 | LRP1          |
| YDR378C                                          | LSM6          | YCR077C                 | PAT1          |
| YOR270C                                          | VPH1          | YLR094C                 | GIS3          |
| YMR224C                                          | MRE11         | YNL106C                 | INP52         |
| YPR120C                                          | CLB5          | YNL107W                 | YAF9          |
| YPR030W                                          | CSR2          | YER162C                 | RAD4          |
| YOR043W                                          | WHI2          | YBR195C                 | MSI1          |
| YML115C                                          | VAN1          | YML028W                 | TSA1          |
| YER116C                                          | SLX8          | YMR311C                 | GLC8          |
| YDR293C                                          | SSD1          | YBL103C                 | RTG3          |
| YMR199W                                          | CLN1          | YHL011C                 | PRS3          |
| YLR386W                                          | VAC14         | YDL192W                 | ARF1          |

| Predictions at threshold level 0.80 continued... |               |                         |               |
|--------------------------------------------------|---------------|-------------------------|---------------|
| Gene1 of predicted pair                          |               | Gene2 of predicted pair |               |
| Systematic Name                                  | Standard Name | Systematic Name         | Standard Name |
| YDR156W                                          | RPA14         | YGR135W                 | PRE9          |
| YPL115C                                          | BEM3          | YPR051W                 | MAK3          |
| YDR440W                                          | DOT1          | YHR115C                 | DMA1          |
| YNL199C                                          | GCR2          | YER122C                 | GLO3          |
| YDR146C                                          | SWI5          | YOR290C                 | SNF2          |
| YKR020W                                          | VPS51         | YML001W                 | YPT7          |
| YHR060W                                          | VMA22         | YOL111C                 | MDY2          |
| YDR137W                                          | RGP1          | YEL027W                 | CUP5          |
| YKL007W                                          | CAP1          | YKL213C                 | DOA1          |
| YNL051W                                          | COG5          | YKL119C                 | VPH2          |
| YNR052C                                          | POP2          | YNL107W                 | YAF9          |
| YGL078C                                          | DBP3          | YBR200W                 | BEM1          |
| YDL020C                                          | RPN4          | YKL139W                 | CTK1          |
| YIR025W                                          | MND2          | YGL003C                 | CDH1          |
| YJL176C                                          | SWI3          | YDR378C                 | LSM6          |
| YCL001W                                          | RER1          | YNL107W                 | YAF9          |
| YDL116W                                          | NUP84         | YKL048C                 | ELM1          |
| YBR290W                                          | BSD2          | YHR114W                 | BZZ1          |
| YGR135W                                          | PRE9          | YBL101C                 | ECM21         |
| YCR031C                                          | RPS14A        | YGL019W                 | CKB1          |
| YLR360W                                          | VPS38         | YDR318W                 | MCM21         |
| YPL042C                                          | SSN3          | YNL297C                 | MON2          |
| YER068W                                          | MOT2          | YLR357W                 | RSC2          |
| YLR192C                                          | HCR1          | YLR371W                 | ROM2          |
| YMR004W                                          | MVP1          | YKR030W                 | GMH1          |
| YFR036W                                          | CDC26         | YKL101W                 | HSL1          |
| YDL184C                                          | RPL41A        | YJR032W                 | CPR7          |
| YGR003W                                          | CUL3          | YLR306W                 | UBC12         |
| YGR135W                                          | PRE9          | YKL101W                 | HSL1          |

| Predictions at threshold level 0.80 continued... |               |                         |               |
|--------------------------------------------------|---------------|-------------------------|---------------|
| Gene1 of predicted pair                          |               | Gene2 of predicted pair |               |
| Systematic Name                                  | Standard Name | Systematic Name         | Standard Name |
| YJL053W                                          | PEP8          | YJR060W                 | CBF1          |
| YLR360W                                          | VPS38         | YMR311C                 | GLC8          |
| YBR126C                                          | TPS1          | YKL139W                 | CTK1          |
| YBR200W                                          | BEM1          | YLR320W                 | MMS22         |
| YDL116W                                          | NUP84         | YBR200W                 | BEM1          |
| YPL137C                                          | GIP3          | YHR081W                 | LRP1          |
| YAL024C                                          | LTE1          | YOR035C                 | SHE4          |
| YNL087W                                          | TCB2          | YHR060W                 | VMA22         |
| YNL166C                                          | BNI5          | YPR046W                 | MCM16         |
| YGL003C                                          | CDH1          | YMR311C                 | GLC8          |
| YPR154W                                          | PIN3          | YHR016C                 | YSC84         |
| YHR129C                                          | ARP1          | YHR098C                 | SFB3          |
| YLR119W                                          | SRN2          | YMR026C                 | PEX12         |
| YLL007C                                          | YLL007C       | YOR023C                 | AHC1          |
| YKL139W                                          | CTK1          | YOL051W                 | GAL11         |
| YBR009C                                          | HHF1          | YER068W                 | MOT2          |
| YOR112W                                          | CEX1          | YDR310C                 | SUM1          |
| YCR020C-A                                        | MAK31         | YJL154C                 | VPS35         |
| YDR318W                                          | MCM21         | YPR119W                 | CLB2          |
| YDR130C                                          | FIN1          | YCR086W                 | CSM1          |
| YLR337C                                          | VRP1          | YOR213C                 | SAS5          |
| YJL154C                                          | VPS35         | YMR004W                 | MVP1          |
| YDR183W                                          | PLP1          | YNL225C                 | CNM67         |
| YMR142C                                          | RPL13B        | YOR035C                 | SHE4          |
| YML038C                                          | YMD8          | YPL120W                 | VPS30         |
| YNL264C                                          | PDR17         | YPL180W                 | TCO89         |
| YLR362W                                          | STE11         | YJL128C                 | PBS2          |
| YOR035C                                          | SHE4          | YAL002W                 | VPS8          |
| YLR386W                                          | VAC14         | YIR005W                 | IST3          |

| Predictions at threshold level 0.80 continued... |               |                         |               |
|--------------------------------------------------|---------------|-------------------------|---------------|
| Gene1 of predicted pair                          |               | Gene2 of predicted pair |               |
| Systematic Name                                  | Standard Name | Systematic Name         | Standard Name |
| YPL161C                                          | BEM4          | YMR311C                 | GLC8          |
| YER016W                                          | BIM1          | YHR056C                 | RSC30         |
| YDR477W                                          | SNF1          | YLR180W                 | SAM1          |
| YDR129C                                          | SAC6          | YOR312C                 | RPL20B        |
| YBR131W                                          | CCZ1          | YNL044W                 | YIP3          |
| YMR224C                                          | MRE11         | YDR289C                 | RTT103        |
| YDR484W                                          | VPS52         | YPL037C                 | EGD1          |
| YOR069W                                          | VPS5          | YPL234C                 | TFP3          |
| YGL115W                                          | SNF4          | YDL155W                 | CLB3          |
| YLR370C                                          | ARC18         | YBR036C                 | CSG2          |
| YDL116W                                          | NUP84         | YCR086W                 | CSM1          |
| YLR386W                                          | VAC14         | YPL137C                 | GIP3          |
| YER110C                                          | KAP123        | YGR270W                 | YTA7          |
| YGL066W                                          | SGF73         | YKL101W                 | HSL1          |
| YBR200W                                          | BEM1          | YGR270W                 | YTA7          |
| YBR200W                                          | BEM1          | YEL056W                 | HAT2          |
| YGR249W                                          | MGA1          | YDR207C                 | UME6          |
| YHR060W                                          | VMA22         | YJL004C                 | SYS1          |
| YNL094W                                          | APP1          | YKL129C                 | MYO3          |
| YOR001W                                          | RRP6          | YKL160W                 | ELF1          |
| YGR217W                                          | CCH1          | YBR082C                 | UBC4          |
| YOR290C                                          | SNF2          | YJL140W                 | RPB4          |
| YEL065W                                          | SIT1          | YDR443C                 | SSN2          |
| YEL051W                                          | VMA8          | YDL077C                 | VAM6          |
| YBR200W                                          | BEM1          | YDL006W                 | PTC1          |
| YBR200W                                          | BEM1          | YHR013C                 | ARD1          |
| YLR234W                                          | TOP3          | YCR077C                 | PAT1          |
| YJR060W                                          | CBF1          | YGR105W                 | VMA21         |
| YDL020C                                          | RPN4          | YBR107C                 | IML3          |

| Predictions at threshold level 0.80 continued... |               |                         |               |
|--------------------------------------------------|---------------|-------------------------|---------------|
| Gene1 of predicted pair                          |               | Gene2 of predicted pair |               |
| Systematic Name                                  | Standard Name | Systematic Name         | Standard Name |
| YDR137W                                          | RGP1          | YBL025W                 | RRN10         |
| YER116C                                          | SLX8          | YDL184C                 | RPL41A        |
| YDL020C                                          | RPN4          | YMR127C                 | SAS2          |
| YLR083C                                          | EMP70         | YOR109W                 | INP53         |
| YPL161C                                          | BEM4          | YOR066W                 | MSA1          |
| YDL013W                                          | SLX5          | YDR076W                 | RAD55         |
| YNL288W                                          | CAF40         | YLR447C                 | VMA6          |
| YKL139W                                          | CTK1          | YGL115W                 | SNF4          |
| YOL051W                                          | GAL11         | YHR200W                 | RPN10         |
| YMR026C                                          | PEX12         | YNL325C                 | FIG4          |
| YBL102W                                          | SFT2          | YPL105C                 | YPL105C       |
| YNL032W                                          | SIW14         | YER122C                 | GLO3          |
| YGL178W                                          | MPT5          | YGR229C                 | SMI1          |
| YDL083C                                          | RPS16B        | YMR152W                 | YIM1          |
| YBR108W                                          | YBR108W       | YPL253C                 | VIK1          |
| YPL240C                                          | HSP82         | YDR545W                 | YRF1-1        |
| YDL116W                                          | NUP84         | YNL248C                 | RPA49         |
| YLR337C                                          | VRP1          | YHR134W                 | WSS1          |
| YDL116W                                          | NUP84         | YPL253C                 | VIK1          |
| YLR216C                                          | CPR6          | YOR195W                 | SLK19         |
| YPR018W                                          | RLF2          | YLR150W                 | STM1          |
| YAL020C                                          | ATS1          | YKR020W                 | VPS51         |
| YLR102C                                          | APC9          | YBL047C                 | EDE1          |
| YDR202C                                          | RAV2          | YGL115W                 | SNF4          |
| YPR036W                                          | VMA13         | YGR105W                 | VMA21         |
| YPL022W                                          | RAD1          | YLR320W                 | MMS22         |
| YNL291C                                          | MID1          | YOR127W                 | RGA1          |
| YFR030W                                          | MET10         | YLR182W                 | SWI6          |
| YIL159W                                          | BNR1          | YBR200W                 | BEM1          |

| Predictions at threshold level 0.80 continued... |               |                         |               |
|--------------------------------------------------|---------------|-------------------------|---------------|
| Gene1 of predicted pair                          |               | Gene2 of predicted pair |               |
| Systematic Name                                  | Standard Name | Systematic Name         | Standard Name |
| YDR320C                                          | SWA2          | YKR020W                 | VPS51         |
| YGR249W                                          | MGA1          | YBR280C                 | SAF1          |
| YMR127C                                          | SAS2          | YAL002W                 | VPS8          |
| YMR224C                                          | MRE11         | YMR152W                 | YIM1          |
| YBR030W                                          | YBR030W       | YFL023W                 | BUD27         |
| YPL253C                                          | VIK1          | YOL054W                 | PSH1          |
| YDR253C                                          | MET32         | YPR120C                 | CLB5          |
| YBR019C                                          | GAL10         | YBR036C                 | CSG2          |
| YCR097W                                          | HMRA1         | YPL240C                 | HSP82         |
| YLR452C                                          | SST2          | YCR053W                 | THR4          |
| YHL025W                                          | SNF6          | YOR038C                 | HIR2          |
| YDR383C                                          | NKP1          | YPL152W                 | RRD2          |
| YGL212W                                          | VAM7          | YKL041W                 | VPS24         |
| YPR036W                                          | VMA13         | YLR452C                 | SST2          |
| YDR507C                                          | GIN4          | YBL047C                 | EDE1          |
| YDR260C                                          | SWM1          | YDR318W                 | MCM21         |
| YLR410W                                          | VIP1          | YDR200C                 | VPS64         |
| YBL058W                                          | SHP1          | YER144C                 | UBP5          |
| YML062C                                          | MFT1          | YCL011C                 | GBP2          |
| YCL010C                                          | SGF29         | YPL248C                 | GAL4          |
| YDR137W                                          | RGP1          | YML071C                 | COG8          |
| YPR089W                                          | YPR089W       | YKR001C                 | VPS1          |
| YOR156C                                          | NFI1          | YOL145C                 | CTR9          |
| YGR105W                                          | VMA21         | YDR310C                 | SUM1          |
| YBR019C                                          | GAL10         | YCR053W                 | THR4          |
| YMR039C                                          | SUB1          | YJR060W                 | CBF1          |
| YLR441C                                          | RPS1A         | YGL025C                 | PGD1          |
| YBR173C                                          | UMP1          | YJR084W                 | CSN12         |
| YHR178W                                          | STB5          | YPL001W                 | HAT1          |



| Predictions at threshold level 0.80 continued... |               |                         |               |
|--------------------------------------------------|---------------|-------------------------|---------------|
| Gene1 of predicted pair                          |               | Gene2 of predicted pair |               |
| Systematic Name                                  | Standard Name | Systematic Name         | Standard Name |
| YDR103W                                          | STE5          | YJL157C                 | FAR1          |
| YLR386W                                          | VAC14         | YOR156C                 | NFI1          |
| YKL048C                                          | ELM1          | YOL054W                 | PSH1          |
| YBR171W                                          | SEC66         | YDR310C                 | SUM1          |
| YLR447C                                          | VMA6          | YGR270W                 | YTA7          |
| YPL234C                                          | TFP3          | YJL095W                 | BCK1          |
| YPR052C                                          | NHP6A         | YBR240C                 | THI2          |
| YGL054C                                          | ERV14         | YER122C                 | GLO3          |
| YMR153W                                          | NUP53         | YGL016W                 | KAP122        |
| YGL175C                                          | SAE2          | YOR368W                 | RAD17         |
| YLR090W                                          | XDJ1          | YOR290C                 | SNF2          |
| YDR260C                                          | SWM1          | YML028W                 | TSA1          |
| YCR086W                                          | CSM1          | YLR254C                 | NDL1          |
| YIL159W                                          | BNR1          | YDR309C                 | GIC2          |
| YPR120C                                          | CLB5          | YHR158C                 | KEL1          |
| YOR290C                                          | SNF2          | YMR214W                 | SCJ1          |
| YLR288C                                          | MEC3          | YNL291C                 | MID1          |
| YGR249W                                          | MGA1          | YPL137C                 | GIP3          |
| YNL297C                                          | MON2          | YEL043W                 | YEL043W       |
| YHL031C                                          | GOS1          | YDR440W                 | DOT1          |
| YBR215W                                          | HPC2          | YHR167W                 | THP2          |
| YJL124C                                          | LSM1          | YHR039C-A               | VMA10         |
| YDL223C                                          | HBT1          | YLR093C                 | NYV1          |
| YOR124C                                          | UBP2          | YNL107W                 | YAF9          |
| YIL053W                                          | RHR2          | YPL057C                 | SUR1          |
| YBL047C                                          | EDE1          | YHR115C                 | DMA1          |
| YCR031C                                          | RPS14A        | YDR310C                 | SUM1          |
| YFR031C-A                                        | RPL2A         | YBR217W                 | ATG12         |
| YLR381W                                          | CTF3          | YLR447C                 | VMA6          |

| Predictions at threshold level 0.80 continued... |               |                         |               |
|--------------------------------------------------|---------------|-------------------------|---------------|
| Gene1 of predicted pair                          |               | Gene2 of predicted pair |               |
| Systematic Name                                  | Standard Name | Systematic Name         | Standard Name |
| YER116C                                          | SLX8          | YLR320W                 | MMS22         |
| YDR254W                                          | CHL4          | YOL054W                 | PSH1          |
| YKR020W                                          | VPS51         | YKR030W                 | GMH1          |
| YDR254W                                          | CHL4          | YPL106C                 | SSE1          |
| YDR363W-A                                        | SEM1          | YJR060W                 | CBF1          |
| YJL053W                                          | PEP8          | YPL234C                 | TFP3          |
| YLR337C                                          | VRP1          | YMR116C                 | ASC1          |
| YJL154C                                          | VPS35         | YPL234C                 | TFP3          |
| YPL106C                                          | SSE1          | YGL003C                 | CDH1          |
| YLR399C                                          | BDF1          | YJL006C                 | CTK2          |
| YBR215W                                          | HPC2          | YJR090C                 | GRR1          |
| YJR032W                                          | CPR7          | YLR180W                 | SAM1          |
| YHR178W                                          | STB5          | YDR310C                 | SUM1          |
| YER110C                                          | KAP123        | YOL067C                 | RTG1          |
| YPL024W                                          | RMI1          | YLR398C                 | SKI2          |
| YHR114W                                          | BZZ1          | YKR030W                 | GMH1          |
| YBL051C                                          | PIN4          | YGL237C                 | HAP2          |
| YGR104C                                          | SRB5          | YCL037C                 | SRO9          |
| YOR327C                                          | SNC2          | YJR033C                 | RAV1          |
| YBR126C                                          | TPS1          | YPL161C                 | BEM4          |
| YDR146C                                          | SWI5          | YGR252W                 | GCN5          |
| YGL115W                                          | SNF4          | YNL230C                 | ELA1          |
| YML115C                                          | VAN1          | YOR327C                 | SNC2          |
| YDR146C                                          | SWI5          | YMR311C                 | GLC8          |
| YOR195W                                          | SLK19         | YLR182W                 | SWI6          |
| YDR137W                                          | RGP1          | YJR135C                 | MCM22         |
| YFL023W                                          | BUD27         | YNL238W                 | KEX2          |
| YLR360W                                          | VPS38         | YDL006W                 | PTC1          |
| YBR107C                                          | IML3          | YGL003C                 | CDH1          |

| Predictions at threshold level 0.80 continued... |               |                         |               |
|--------------------------------------------------|---------------|-------------------------|---------------|
| Gene1 of predicted pair                          |               | Gene2 of predicted pair |               |
| Systematic Name                                  | Standard Name | Systematic Name         | Standard Name |
| YIL008W                                          | URM1          | YDL047W                 | SIT4          |
| YPR051W                                          | MAK3          | YNL238W                 | KEX2          |
| YDR071C                                          | PAA1          | YOR368W                 | RAD17         |
| YLR381W                                          | CTF3          | YLR315W                 | NKP2          |
| YBL021C                                          | HAP3          | YDR144C                 | MKC7          |
| YDR156W                                          | RPA14         | YLR399C                 | BDF1          |
| YNL325C                                          | FIG4          | YMR133W                 | REC114        |
| YDR183W                                          | PLP1          | YGL124C                 | MON1          |
| YDL042C                                          | SIR2          | YDR110W                 | FOB1          |
| YDR293C                                          | SSD1          | YOL018C                 | TLG2          |
| YLR441C                                          | RPS1A         | YBR019C                 | GAL10         |
| YML067C                                          | ERV41         | YLR093C                 | NYV1          |
| YOR337W                                          | TEA1          | YKL048C                 | ELM1          |
| YKR001C                                          | VPS1          | YNL041C                 | COG6          |
| YCR020C-A                                        | MAK31         | YHR039C-A               | VMA10         |
| YCL037C                                          | SRO9          | YNL107W                 | YAF9          |
| YMR116C                                          | ASC1          | YCR077C                 | PAT1          |
| YFR010W                                          | UBP6          | YLR234W                 | TOP3          |
| YBR215W                                          | HPC2          | YGL151W                 | NUT1          |
| YER116C                                          | SLX8          | YBR082C                 | UBC4          |
| YKL139W                                          | CTK1          | YOR038C                 | HIR2          |
| YDR080W                                          | VPS41         | YOR109W                 | INP53         |
| YGL087C                                          | MMS2          | YGL237C                 | HAP2          |
| YHR134W                                          | WSS1          | YLR135W                 | SLX4          |
| YPR017C                                          | DSS4          | YER162C                 | RAD4          |
| YAL024C                                          | LTE1          | YIL159W                 | BNR1          |
| YHR039C-A                                        | VMA10         | YAL002W                 | VPS8          |
| YBR057C                                          | MUM2          | YKR020W                 | VPS51         |
| YJL176C                                          | SWI3          | YPL057C                 | SUR1          |

| Predictions at threshold level 0.80 continued... |               |                         |               |
|--------------------------------------------------|---------------|-------------------------|---------------|
| Gene1 of predicted pair                          |               | Gene2 of predicted pair |               |
| Systematic Name                                  | Standard Name | Systematic Name         | Standard Name |
| YNR052C                                          | POP2          | YLR386W                 | VAC14         |
| YOR106W                                          | VAM3          | YGR105W                 | VMA21         |
| YPL213W                                          | LEA1          | YIR005W                 | IST3          |
| YPL120W                                          | VPS30         | YAR014C                 | BUD14         |
| YNL307C                                          | MCK1          | YAR014C                 | BUD14         |
| YML115C                                          | VAN1          | YMR214W                 | SCJ1          |
| YPL137C                                          | GIP3          | YGL003C                 | CDH1          |
| YLR398C                                          | SKI2          | YKL041W                 | VPS24         |
| YPL161C                                          | BEM4          | YJL183W                 | MNN11         |
| YOR106W                                          | VAM3          | YGL212W                 | VAM7          |
| YPL203W                                          | TPK2          | YER068W                 | MOT2          |
| YDR439W                                          | LRS4          | YIR005W                 | IST3          |
| YAL024C                                          | LTE1          | YOR308C                 | SNU66         |
| YDR293C                                          | SSD1          | YHR114W                 | BZZ1          |
| YLR119W                                          | SRN2          | YHR081W                 | LRP1          |
| YGL033W                                          | HOP2          | YPL161C                 | BEM4          |
| YPR046W                                          | MCM16         | YDR310C                 | SUM1          |
| YGR104C                                          | SRB5          | YIR005W                 | IST3          |
| YDL020C                                          | RPN4          | YDR289C                 | RTT103        |
| YFR036W                                          | CDC26         | YML112W                 | CTK3          |
| YLR083C                                          | EMP70         | YEL051W                 | VMA8          |
| YJL036W                                          | SNX4          | YPL037C                 | EGD1          |
| YMR095C                                          | SNO1          | YKL139W                 | CTK1          |
| YDL116W                                          | NUP84         | YNL218W                 | MGS1          |
| YJL172W                                          | CPS1          | YJL183W                 | MNN11         |
| YDL223C                                          | HBT1          | YPL050C                 | MNN9          |
| YBR200W                                          | BEM1          | YDR378C                 | LSM6          |
| YDL020C                                          | RPN4          | YFL023W                 | BUD27         |
| YER118C                                          | SHO1          | YLR398C                 | SKI2          |

| Predictions at threshold level 0.80 continued... |               |                         |               |
|--------------------------------------------------|---------------|-------------------------|---------------|
| Gene1 of predicted pair                          |               | Gene2 of predicted pair |               |
| Systematic Name                                  | Standard Name | Systematic Name         | Standard Name |
| YOR275C                                          | RIM20         | YPL161C                 | BEM4          |
| YNL032W                                          | SIW14         | YBL103C                 | RTG3          |
| YMR133W                                          | REC114        | YPR046W                 | MCM16         |
| YKL116C                                          | PRR1          | YIL076W                 | SEC28         |
| YIL034C                                          | CAP2          | YEL053C                 | MAK10         |
| YDR225W                                          | HTA1          | YJR060W                 | CBF1          |
| YBR200W                                          | BEM1          | YKL119C                 | VPH2          |
| YKR035W-A                                        | DID2          | YML001W                 | YPT7          |
| YDR200C                                          | VPS64         | YPR119W                 | CLB2          |
| YLR148W                                          | PEP3          | YBR127C                 | VMA2          |
| YNL325C                                          | FIG4          | YLR371W                 | ROM2          |
| YML103C                                          | NUP188        | YGR059W                 | SPR3          |
| YMR224C                                          | MRE11         | YLR094C                 | GIS3          |
| YOR106W                                          | VAM3          | YOR008C                 | SLG1          |
| YMR142C                                          | RPL13B        | YBL103C                 | RTG3          |
| YBR217W                                          | ATG12         | YHR060W                 | VMA22         |
| YHL020C                                          | OPI1          | YHR039C-A               | VMA10         |
| YML016C                                          | PPZ1          | YBR171W                 | SEC66         |
| YGL135W                                          | RPL1B         | YHR013C                 | ARD1          |
| YGL087C                                          | MMS2          | YOR127W                 | RGA1          |
| YLR043C                                          | TRX1          | YKR001C                 | VPS1          |
| YLR254C                                          | NDL1          | YNL225C                 | CNM67         |
| YDR004W                                          | RAD57         | YGL151W                 | NUT1          |
| YDR507C                                          | GIN4          | YGL031C                 | RPL24A        |
| YHL011C                                          | PRS3          | YHR158C                 | KEL1          |
| YPR032W                                          | SRO7          | YKR030W                 | GMH1          |
| YPR046W                                          | MCM16         | YLR233C                 | EST1          |
| YDR443C                                          | SSN2          | YDR310C                 | SUM1          |
| YGR249W                                          | MGA1          | YLR371W                 | ROM2          |

| Predictions at threshold level 0.80 continued... |               |                         |               |
|--------------------------------------------------|---------------|-------------------------|---------------|
| Gene1 of predicted pair                          |               | Gene2 of predicted pair |               |
| Systematic Name                                  | Standard Name | Systematic Name         | Standard Name |
| YER044C                                          | ERG28         | YHR200W                 | RPN10         |
| YIL159W                                          | BNR1          | YHR111W                 | UBA4          |
| YOR043W                                          | WHI2          | YPR030W                 | CSR2          |
| YML012W                                          | ERV25         | YNL049C                 | SFB2          |
| YLR337C                                          | VRP1          | YBR171W                 | SEC66         |
| YNL106C                                          | INP52         | YDR318W                 | MCM21         |
| YFL023W                                          | BUD27         | YOL111C                 | MDY2          |
| YOR337W                                          | TEA1          | YGL078C                 | DBP3          |
| YPR084W                                          | YPR084W       | YGR105W                 | VMA21         |
| YDR448W                                          | ADA2          | YNR052C                 | POP2          |
| YLR083C                                          | EMP70         | YHR039C-A               | VMA10         |
| YLR292C                                          | SEC72         | YDR155C                 | CPR1          |
| YGL153W                                          | PEX14         | YKR020W                 | VPS51         |
| YML115C                                          | VAN1          | YHR013C                 | ARD1          |
| YCR020C-A                                        | MAK31         | YJR060W                 | CBF1          |
| YBR280C                                          | SAF1          | YLR180W                 | SAM1          |
| YDL239C                                          | ADY3          | YOR177C                 | MPC54         |
| YHR171W                                          | ATG7          | YPL149W                 | ATG5          |
| YDL002C                                          | NHP10         | YER139C                 | YER139C       |
| YBL051C                                          | PIN4          | YEL056W                 | HAT2          |
| YLR079W                                          | SIC1          | YKL117W                 | SBA1          |
| YIL159W                                          | BNR1          | YKL139W                 | CTK1          |
| YDR103W                                          | STE5          | YBL016W                 | FUS3          |
| YHR039C-A                                        | VMA10         | YEL056W                 | HAT2          |
| YEL065W                                          | SIT1          | YGL124C                 | MON1          |
| YMR153W                                          | NUP53         | YDR358W                 | GGA1          |
| YGL163C                                          | RAD54         | YMR231W                 | PEP5          |
| YGL250W                                          | RMR1          | YJR032W                 | CPR7          |
| YFR010W                                          | UBP6          | YOL111C                 | MDY2          |

| Predictions at threshold level 0.80 continued... |               |                         |               |
|--------------------------------------------------|---------------|-------------------------|---------------|
| Gene1 of predicted pair                          |               | Gene2 of predicted pair |               |
| Systematic Name                                  | Standard Name | Systematic Name         | Standard Name |
| YEL065W                                          | SIT1          | YKR035W-A               | DID2          |
| YOL054W                                          | PSH1          | YNL107W                 | YAF9          |
| YMR095C                                          | SNO1          | YLR386W                 | VAC14         |
| YBR200W                                          | BEM1          | YPL161C                 | BEM4          |
| YLR138W                                          | NHA1          | YML132W                 | COS3          |
| YMR055C                                          | BUB2          | YNL079C                 | TPM1          |
| YPR029C                                          | APL4          | YPL259C                 | APM1          |
| YDR144C                                          | MKC7          | YJR090C                 | GRR1          |
| YGL147C                                          | RPL9A         | YKR099W                 | BAS1          |
| YPR084W                                          | YPR084W       | YER122C                 | GLO3          |
| YLR083C                                          | EMP70         | YLR360W                 | VPS38         |
| YBR107C                                          | IML3          | YOR141C                 | ARP8          |
| YOR043W                                          | WHI2          | YMR230W                 | RPS10B        |
| YGL250W                                          | RMR1          | YJR135C                 | MCM22         |
| YML001W                                          | YPT7          | YDR153C                 | ENT5          |
| YIL159W                                          | BNR1          | YOR035C                 | SHE4          |
| YPL256C                                          | CLN2          | YLR182W                 | SWI6          |
| YJR140C                                          | HIR3          | YOR080W                 | DIA2          |
| YBL103C                                          | RTG3          | YBL025W                 | RRN10         |
| YER116C                                          | SLX8          | YER139C                 | YER139C       |
| YPL161C                                          | BEM4          | YCR053W                 | THR4          |
| YML109W                                          | ZDS2          | YKR095W                 | MLP1          |
| YML115C                                          | VAN1          | YJL006C                 | CTK2          |
| YER122C                                          | GLO3          | YPR032W                 | SRO7          |
| YOL111C                                          | MDY2          | YLR398C                 | SKI2          |
| YLL039C                                          | UBI4          | YDR378C                 | LSM6          |
| YAL024C                                          | LTE1          | YPL018W                 | CTF19         |
| YBR082C                                          | UBC4          | YJR035W                 | RAD26         |
| YFL023W                                          | BUD27         | YJL095W                 | BCK1          |

| Predictions at threshold level 0.80 continued... |               |                         |               |
|--------------------------------------------------|---------------|-------------------------|---------------|
| Gene1 of predicted pair                          |               | Gene2 of predicted pair |               |
| Systematic Name                                  | Standard Name | Systematic Name         | Standard Name |
| YGR249W                                          | MGA1          | YML115C                 | VAN1          |
| YMR004W                                          | MVP1          | YMR054W                 | STV1          |
| YDR076W                                          | RAD55         | YDR310C                 | SUM1          |
| YPR084W                                          | YPR084W       | YIR005W                 | IST3          |
| YDR129C                                          | SAC6          | YGR133W                 | PEX4          |
| YJL124C                                          | LSM1          | YPR119W                 | CLB2          |
| YHR039C-A                                        | VMA10         | YGL148W                 | ARO2          |
| YNL206C                                          | RTT106        | YNL229C                 | URE2          |
| YAR014C                                          | BUD14         | YNL225C                 | CNM67         |
| YLR371W                                          | ROM2          | YMR152W                 | YIM1          |
| YNL069C                                          | RPL16B        | YDR202C                 | RAV2          |
| YBL106C                                          | SRO77         | YNL090W                 | RHO2          |
| YBL008W                                          | HIR1          | YNL206C                 | RTT106        |
| YDR382W                                          | RPP2B         | YNL145W                 | MFA2          |
| YLR320W                                          | MMS22         | YBL101C                 | ECM21         |
| YGL147C                                          | RPL9A         | YLR371W                 | ROM2          |
| YNL206C                                          | RTT106        | YML102W                 | CAC2          |
| YLR360W                                          | VPS38         | YDL226C                 | GCS1          |
| YKL126W                                          | YPK1          | YDR261C                 | EXG2          |
| YKL139W                                          | CTK1          | YBL101C                 | ECM21         |
| YMR199W                                          | CLN1          | YHR200W                 | RPN10         |
| YPL129W                                          | TAF14         | YOR189W                 | IES4          |
| YLR410W                                          | VIP1          | YMR038C                 | CCS1          |
| YPL115C                                          | BEM3          | YPR046W                 | MCM16         |
| YLR093C                                          | NYV1          | YDL077C                 | VAM6          |
| YEL053C                                          | MAK10         | YGL054C                 | ERV14         |
| YDR254W                                          | CHL4          | YJL006C                 | CTK2          |
| YOR375C                                          | GDH1          | YJL095W                 | BCK1          |
| YGR249W                                          | MGA1          | YDR358W                 | GGA1          |



| Predictions at threshold level 0.80 continued... |               |                         |               |
|--------------------------------------------------|---------------|-------------------------|---------------|
| Gene1 of predicted pair                          |               | Gene2 of predicted pair |               |
| Systematic Name                                  | Standard Name | Systematic Name         | Standard Name |
| YLR102C                                          | APC9          | YGL003C                 | CDH1          |
| YOR069W                                          | VPS5          | YKL119C                 | VPH2          |
| YDL127W                                          | PCL2          | YGR233C                 | PHO81         |
| YLR441C                                          | RPS1A         | YPL057C                 | SUR1          |
| YDR335W                                          | MSN5          | YJL157C                 | FAR1          |
| YLR192C                                          | HCR1          | YJL172W                 | CPS1          |
| YLR079W                                          | SIC1          | YMR198W                 | CIK1          |
| YGL135W                                          | RPL1B         | YBR082C                 | UBC4          |
| YKR099W                                          | BAS1          | YOR043W                 | WHI2          |
| YPL137C                                          | GIP3          | YBR036C                 | CSG2          |
| YMR224C                                          | MRE11         | YLR394W                 | CST9          |
| YDR378C                                          | LSM6          | YOR320C                 | GNT1          |
| YBR274W                                          | CHK1          | YBR215W                 | HPC2          |
| YJR099W                                          | YUH1          | YOR124C                 | UBP2          |
| YFL023W                                          | BUD27         | YKL126W                 | YPK1          |
| YLR083C                                          | EMP70         | YGL054C                 | ERV14         |
| YDL006W                                          | PTC1          | YAL002W                 | VPS8          |
| YFR031C-A                                        | RPL2A         | YER040W                 | GLN3          |
| YNL106C                                          | INP52         | YFR036W                 | CDC26         |
| YNL201C                                          | PSY2          | YOR141C                 | ARP8          |
| YPL022W                                          | RAD1          | YJR060W                 | CBF1          |
| YNR052C                                          | POP2          | YJR035W                 | RAD26         |
| YLL007C                                          | YLL007C       | YAL002W                 | VPS8          |
| YGL033W                                          | HOP2          | YNL325C                 | FIG4          |
| YDL020C                                          | RPN4          | YGL175C                 | SAE2          |
| YBR107C                                          | IML3          | YGR188C                 | BUB1          |
| YGR104C                                          | SRB5          | YCR077C                 | PAT1          |
| YBR171W                                          | SEC66         | YGL151W                 | NUT1          |
| YLR320W                                          | MMS22         | YDR310C                 | SUM1          |

| Predictions at threshold level 0.80 continued... |               |                         |               |
|--------------------------------------------------|---------------|-------------------------|---------------|
| Gene1 of predicted pair                          |               | Gene2 of predicted pair |               |
| Systematic Name                                  | Standard Name | Systematic Name         | Standard Name |
| YMR004W                                          | MVP1          | YNL044W                 | YIP3          |
| YKR048C                                          | NAP1          | YOR327C                 | SNC2          |
| YPR018W                                          | RLF2          | YDR207C                 | UME6          |
| YLR292C                                          | SEC72         | YBR107C                 | IML3          |
| YCR081W                                          | SRB8          | YBR260C                 | RGD1          |
| YHR200W                                          | RPN10         | YLR370C                 | ARC18         |
| YDR443C                                          | SSN2          | YGR249W                 | MGA1          |
| YGL054C                                          | ERV14         | YPL120W                 | VPS30         |
| YHR111W                                          | UBA4          | YJR060W                 | CBF1          |
| YKL126W                                          | YPK1          | YDL223C                 | HBT1          |
| YHR152W                                          | SPO12         | YJL095W                 | BCK1          |
| YLR337C                                          | VRP1          | YMR127C                 | SAS2          |
| YLR288C                                          | MEC3          | YPR120C                 | CLB5          |
| YOR308C                                          | SNU66         | YOR124C                 | UBP2          |
| YIL053W                                          | RHR2          | YER122C                 | GLO3          |
| YDR108W                                          | GSG1          | YCL001W                 | RER1          |
| YIL053W                                          | RHR2          | YJR032W                 | CPR7          |
| YBR216C                                          | YBP1          | YML007W                 | YAP1          |
| YMR017W                                          | SPO20         | YNR049C                 | MSO1          |
| YOR290C                                          | SNF2          | YHR108W                 | GGA2          |
| YDR320C                                          | SWA2          | YDR137W                 | RGP1          |
| YGL223C                                          | COG1          | YNL041C                 | COG6          |
| YMR095C                                          | SNO1          | YLR180W                 | SAM1          |
| YOR195W                                          | SLK19         | YKL114C                 | APN1          |
| YLR018C                                          | POM34         | YDL059C                 | RAD59         |
| YKL116C                                          | PRR1          | YER040W                 | GLN3          |
| YOR106W                                          | VAM3          | YLR309C                 | IMH1          |
| YFR010W                                          | UBP6          | YIL076W                 | SEC28         |
| YLR399C                                          | BDF1          | YPR072W                 | NOT5          |

| Predictions at threshold level 0.80 continued... |               |                         |               |
|--------------------------------------------------|---------------|-------------------------|---------------|
| Gene1 of predicted pair                          |               | Gene2 of predicted pair |               |
| Systematic Name                                  | Standard Name | Systematic Name         | Standard Name |
| YMR199W                                          | CLN1          | YKR048C                 | NAP1          |
| YKR061W                                          | KTR2          | YIR005W                 | IST3          |
| YNR072W                                          | HXT17         | YBR019C                 | GAL10         |
| YNL307C                                          | MCK1          | YGR188C                 | BUB1          |
| YDR080W                                          | VPS41         | YCL001W                 | RER1          |
| YHR098C                                          | SFB3          | YGR229C                 | SMI1          |
| YOR076C                                          | SKI7          | YJR140C                 | HIR3          |
| YDR443C                                          | SSN2          | YER122C                 | GLO3          |
| YDR289C                                          | RTT103        | YHR114W                 | BZZ1          |
| YKL006W                                          | RPL14A        | YKL041W                 | VPS24         |
| YPR051W                                          | MAK3          | YDR318W                 | MCM21         |
| YJR056C                                          | YJR056C       | YOR066W                 | MSA1          |
| YFR040W                                          | SAP155        | YJL095W                 | BCK1          |
| YPL115C                                          | BEM3          | YMR273C                 | ZDS1          |
| YNL297C                                          | MON2          | YLR032W                 | RAD5          |
| YLR090W                                          | XDJ1          | YDR477W                 | SNF1          |
| YJR135C                                          | MCM22         | YJL190C                 | RPS22A        |
| YHL031C                                          | GOS1          | YER162C                 | RAD4          |
| YGL212W                                          | VAM7          | YLR309C                 | IMH1          |
| YGL087C                                          | MMS2          | YEL056W                 | HAT2          |
| YCR020C-A                                        | MAK31         | YCR066W                 | RAD18         |
| YDL184C                                          | RPL41A        | YOR290C                 | SNF2          |
| YNL307C                                          | MCK1          | YPL018W                 | CTF19         |
| YOR076C                                          | SKI7          | YHR167W                 | THP2          |
| YPL137C                                          | GIP3          | YMR230W                 | RPS10B        |
| YOR127W                                          | RGA1          | YBL021C                 | HAP3          |
| YBR108W                                          | YBR108W       | YKR099W                 | BAS1          |
| YDR310C                                          | SUM1          | YMR230W                 | RPS10B        |
| YBL078C                                          | ATG8          | YHL031C                 | GOS1          |

| Predictions at threshold level 0.80 continued... |               |                         |               |
|--------------------------------------------------|---------------|-------------------------|---------------|
| Gene1 of predicted pair                          |               | Gene2 of predicted pair |               |
| Systematic Name                                  | Standard Name | Systematic Name         | Standard Name |
| YKR020W                                          | VPS51         | YJL004C                 | SYS1          |
| YLR337C                                          | VRP1          | YFR036W                 | CDC26         |
| YPR066W                                          | UBA3          | YDR139C                 | RUB1          |
| YHL031C                                          | GOS1          | YJL036W                 | SNX4          |
| YPR131C                                          | NAT3          | YHR010W                 | RPL27A        |
| YMR054W                                          | STV1          | YNL051W                 | COG5          |
| YGL200C                                          | EMP24         | YKR014C                 | YPT52         |
| YEL013W                                          | VAC8          | YAL002W                 | VPS8          |
| YOR035C                                          | SHE4          | YJL183W                 | MNN11         |
| YOR069W                                          | VPS5          | YJR040W                 | GEF1          |
| YNL325C                                          | FIG4          | YBR280C                 | SAF1          |
| YMR199W                                          | CLN1          | YGL190C                 | CDC55         |
| YER116C                                          | SLX8          | YMR153W                 | NUP53         |
| YPL249C-A                                        | RPL36B        | YCR009C                 | RVS161        |
| YBL008W                                          | HIR1          | YNL236W                 | SIN4          |
| YOR043W                                          | WHI2          | YMR152W                 | YIM1          |
| YDL185W                                          | TFP1          | YNL107W                 | YAF9          |
| YMR026C                                          | PEX12         | YDR142C                 | PEX7          |
| YPL037C                                          | EGD1          | YFL033C                 | RIM15         |
| YPR046W                                          | MCM16         | YJR035W                 | RAD26         |
| YML058W                                          | SML1          | YGL094C                 | PAN2          |
| YNL215W                                          | IES2          | YGR270W                 | YTA7          |
| YPL253C                                          | VIK1          | YDR155C                 | CPR1          |
| YDR358W                                          | GGA1          | YLR398C                 | SKI2          |
| YLR320W                                          | MMS22         | YGR188C                 | BUB1          |
| YBR171W                                          | SEC66         | YDL083C                 | RPS16B        |
| YPL022W                                          | RAD1          | YOR368W                 | RAD17         |
| YKL116C                                          | PRR1          | YBR171W                 | SEC66         |
| YMR172W                                          | HOT1          | YGR054W                 | YGR054W       |

| Predictions at threshold level 0.80 continued... |               |                         |               |
|--------------------------------------------------|---------------|-------------------------|---------------|
| Gene1 of predicted pair                          |               | Gene2 of predicted pair |               |
| Systematic Name                                  | Standard Name | Systematic Name         | Standard Name |
| YPL096C-A                                        | ERI1          | YER111C                 | SWI4          |
| YKL139W                                          | CTK1          | YKL110C                 | KTI12         |
| YNL087W                                          | TCB2          | YFR036W                 | CDC26         |
| YDR004W                                          | RAD57         | YPL178W                 | CBC2          |
| YDL184C                                          | RPL41A        | YDL083C                 | RPS16B        |
| YPL022W                                          | RAD1          | YGL163C                 | RAD54         |
| YHR178W                                          | STB5          | YAL002W                 | VPS8          |
| YOR127W                                          | RGA1          | YJR135C                 | MCM22         |
| YOL051W                                          | GAL11         | YER068W                 | MOT2          |
| YPL001W                                          | HAT1          | YCR077C                 | PAT1          |
| YOR290C                                          | SNF2          | YLR371W                 | ROM2          |
| YOR076C                                          | SKI7          | YHR077C                 | NMD2          |
| YAL024C                                          | LTE1          | YNL076W                 | MKS1          |
| YOR039W                                          | CKB2          | YNL079C                 | TPM1          |
| YJL036W                                          | SNX4          | YKR030W                 | GMH1          |
| YNL248C                                          | RPA49         | YPR120C                 | CLB5          |
| YMR224C                                          | MRE11         | YDL083C                 | RPS16B        |
| YNL106C                                          | INP52         | YLR079W                 | SIC1          |
| YHR178W                                          | STB5          | YBL021C                 | HAP3          |
| YDL083C                                          | RPS16B        | YGL124C                 | MON1          |
| YFR036W                                          | CDC26         | YOL054W                 | PSH1          |
| YDL082W                                          | RPL13A        | YGL246C                 | RAI1          |
| YDR004W                                          | RAD57         | YKL101W                 | HSL1          |
| YDR378C                                          | LSM6          | YNL079C                 | TPM1          |
| YBL071W-A                                        | KTI11         | YKL191W                 | DPH2          |
| YML071C                                          | COG8          | YPL120W                 | VPS30         |
| YML016C                                          | PPZ1          | YKL101W                 | HSL1          |
| YDL116W                                          | NUP84         | YDL059C                 | RAD59         |
| YBL047C                                          | EDE1          | YHL002W                 | HSE1          |

| Predictions at threshold level 0.80 continued... |               |                         |               |
|--------------------------------------------------|---------------|-------------------------|---------------|
| Gene1 of predicted pair                          |               | Gene2 of predicted pair |               |
| Systematic Name                                  | Standard Name | Systematic Name         | Standard Name |
| YJL036W                                          | SNX4          | YDL077C                 | VAM6          |
| YDR254W                                          | CHL4          | YNL236W                 | SIN4          |
| YGL078C                                          | DBP3          | YIL076W                 | SEC28         |
| YNL058C                                          | YNL058C       | YER122C                 | GLO3          |
| YOR243C                                          | PUS7          | YCL037C                 | SRO9          |
| YML095C                                          | RAD10         | YML102W                 | CAC2          |
| YJL138C                                          | TIF2          | YGL019W                 | CKB1          |
| YDR137W                                          | RGP1          | YFR036W                 | CDC26         |
| YNL090W                                          | RHO2          | YDL240W                 | LRG1          |
| YER115C                                          | SPR6          | YMR199W                 | CLN1          |
| YLR337C                                          | VRP1          | YPL096C-A               | ERI1          |
| YOR035C                                          | SHE4          | YLR180W                 | SAM1          |
| YIL156W                                          | UBP7          | YOL126C                 | MDH2          |
| YKL048C                                          | ELM1          | YDL077C                 | VAM6          |
| YLR079W                                          | SIC1          | YKL213C                 | DOA1          |
| YLR309C                                          | IMH1          | YAR014C                 | BUD14         |
| YER144C                                          | UBP5          | YEL060C                 | PRB1          |
| YAL051W                                          | OAF1          | YEL056W                 | HAT2          |
| YKR057W                                          | RPS21A        | YKL048C                 | ELM1          |
| YKL048C                                          | ELM1          | YLR370C                 | ARC18         |
| YLR234W                                          | TOP3          | YNL297C                 | MON2          |
| YDL116W                                          | NUP84         | YDL013W                 | SLX5          |
| YER118C                                          | SHO1          | YJL183W                 | MNN11         |
| YDR383C                                          | NKP1          | YOL054W                 | PSH1          |
| YOR109W                                          | INP53         | YCR066W                 | RAD18         |
| YDR137W                                          | RGP1          | YJR084W                 | CSN12         |
| YNL044W                                          | YIP3          | YKR020W                 | VPS51         |
| YGR108W                                          | CLB1          | YBL051C                 | PIN4          |
| YPR051W                                          | MAK3          | YKR020W                 | VPS51         |

| Predictions at threshold level 0.80 continued... |               |                         |               |
|--------------------------------------------------|---------------|-------------------------|---------------|
| Gene1 of predicted pair                          |               | Gene2 of predicted pair |               |
| Systematic Name                                  | Standard Name | Systematic Name         | Standard Name |
| YLR095C                                          | IOC2          | YMR311C                 | GLC8          |
| YNL032W                                          | SIW14         | YLR370C                 | ARC18         |
| YKR048C                                          | NAP1          | YGL031C                 | RPL24A        |
| YBR108W                                          | YBR108W       | YJL183W                 | MNN11         |
| YJR032W                                          | CPR7          | YHR081W                 | LRP1          |
| YGR200C                                          | ELP2          | YBL071W-A               | KTI11         |
| YNL215W                                          | IES2          | YER161C                 | SPT2          |
| YNL291C                                          | MID1          | YJR135C                 | MCM22         |
| YKL116C                                          | PRR1          | YNL058C                 | YNL058C       |
| YDR477W                                          | SNF1          | YDR358W                 | GGA1          |
| YOR337W                                          | TEA1          | YPL161C                 | BEM4          |
| YPL253C                                          | VIK1          | YNL107W                 | YAF9          |
| YEL065W                                          | SIT1          | YHR060W                 | VMA22         |
| YCR097W                                          | HMRA1         | YCR039C                 | MATALPHA2     |
| YIL076W                                          | SEC28         | YKR099W                 | BAS1          |
| YMR152W                                          | YIM1          | YER139C                 | YER139C       |
| YPL001W                                          | HAT1          | YBR274W                 | CHK1          |
| YPR120C                                          | CLB5          | YOL091W                 | SPO21         |
| YNL106C                                          | INP52         | YML016C                 | PPZ1          |
| YGL153W                                          | PEX14         | YJL095W                 | BCK1          |
| YML117W                                          | NAB6          | YMR038C                 | CCS1          |
| YPL115C                                          | BEM3          | YCR086W                 | CSM1          |
| YOR066W                                          | MSA1          | YBR019C                 | GAL10         |
| YCL001W                                          | RER1          | YNL238W                 | KEX2          |
| YOR197W                                          | MCA1          | YBL106C                 | SRO77         |
| YIL076W                                          | SEC28         | YEL053C                 | MAK10         |
| YLR360W                                          | VPS38         | YMR199W                 | CLN1          |
| YDR363W-A                                        | SEM1          | YGR252W                 | GCN5          |
| YPR017C                                          | DSS4          | YER122C                 | GLO3          |

| Predictions at threshold level 0.80 continued... |               |                         |               |
|--------------------------------------------------|---------------|-------------------------|---------------|
| Gene1 of predicted pair                          |               | Gene2 of predicted pair |               |
| Systematic Name                                  | Standard Name | Systematic Name         | Standard Name |
| YDR443C                                          | SSN2          | YGL115W                 | SNF4          |
| YLR360W                                          | VPS38         | YER162C                 | RAD4          |
| YMR199W                                          | CLN1          | YEL036C                 | ANP1          |
| YGL147C                                          | RPL9A         | YER122C                 | GLO3          |
| YNL068C                                          | FKH2          | YNL229C                 | URE2          |
| YLR135W                                          | SLX4          | YCR086W                 | CSM1          |
| YDR245W                                          | MNN10         | YPL213W                 | LEA1          |
| YGL133W                                          | ITC1          | YIL008W                 | URM1          |
| YER068W                                          | MOT2          | YGR134W                 | CAF130        |
| YER110C                                          | KAP123        | YBR171W                 | SEC66         |
| YGL212W                                          | VAM7          | YDR080W                 | VPS41         |
| YMR055C                                          | BUB2          | YPR046W                 | MCM16         |
| YNL325C                                          | FIG4          | YNL307C                 | MCK1          |
| YNL297C                                          | MON2          | YGR105W                 | VMA21         |
| YMR224C                                          | MRE11         | YHR115C                 | DMA1          |
| YGR020C                                          | VMA7          | YOL018C                 | TLG2          |
| YKL032C                                          | IXR1          | YDL155W                 | CLB3          |
| YGL078C                                          | DBP3          | YDL077C                 | VAM6          |
| YDR146C                                          | SWI5          | YDR207C                 | UME6          |
| YNL107W                                          | YAF9          | YLR182W                 | SWI6          |
| YOR270C                                          | VPH1          | YMR152W                 | YIM1          |
| YOL121C                                          | RPS19A        | YMR311C                 | GLC8          |
| YPL042C                                          | SSN3          | YOR080W                 | DIA2          |
| YMR164C                                          | MSS11         | YKL068W                 | NUP100        |
| YMR231W                                          | PEP5          | YLR093C                 | NYV1          |
| YOR127W                                          | RGA1          | YJL183W                 | MNN11         |
| YHR012W                                          | VPS29         | YJL095W                 | BCK1          |
| YBL072C                                          | RPS8A         | YOL081W                 | IRA2          |
| YER144C                                          | UBP5          | YJR084W                 | CSN12         |



| Predictions at threshold level 0.80 continued... |               |                         |               |
|--------------------------------------------------|---------------|-------------------------|---------------|
| Gene1 of predicted pair                          |               | Gene2 of predicted pair |               |
| Systematic Name                                  | Standard Name | Systematic Name         | Standard Name |
| YDR103W                                          | STE5          | YCL032W                 | STE50         |
| YLR386W                                          | VAC14         | YBR200W                 | BEM1          |
| YFL048C                                          | EMP47         | YEL036C                 | ANP1          |
| YLR234W                                          | TOP3          | YNL016W                 | PUB1          |
| YBL103C                                          | RTG3          | YOL067C                 | RTG1          |
| YJL078C                                          | PRY3          | YFL044C                 | OTU1          |
| YKR072C                                          | SIS2          | YPL001W                 | HAT1          |
| YMR199W                                          | CLN1          | YMR311C                 | GLC8          |
| YOR001W                                          | RRP6          | YLR182W                 | SWI6          |
| YIL159W                                          | BNR1          | YPL037C                 | EGD1          |
| YBR108W                                          | YBR108W       | YER139C                 | YER139C       |
| YHR161C                                          | YAP1801       | YAL030W                 | SNC1          |
| YLR234W                                          | TOP3          | YMR038C                 | CCS1          |
| YKL139W                                          | CTK1          | YNL325C                 | FIG4          |
| YOR275C                                          | RIM20         | YKR048C                 | NAP1          |
| YPL253C                                          | VIK1          | YOL067C                 | RTG1          |
| YDL116W                                          | NUP84         | YMR198W                 | CIK1          |
| YMR224C                                          | MRE11         | YLR441C                 | RPS1A         |
| YER044C                                          | ERG28         | YML071C                 | COG8          |
| YLR079W                                          | SIC1          | YJR063W                 | RPA12         |
| YAL014C                                          | SYN8          | YOR036W                 | PEP12         |
| YNL106C                                          | INP52         | YPL018W                 | CTF19         |
| YMR224C                                          | MRE11         | YMR055C                 | BUB2          |
| YPL253C                                          | VIK1          | YHR111W                 | UBA4          |
| YBL008W                                          | HIR1          | YGL003C                 | CDH1          |
| YDL006W                                          | PTC1          | YBR082C                 | UBC4          |
| YLR006C                                          | SSK1          | YGL038C                 | OCH1          |
| YPR072W                                          | NOT5          | YOR064C                 | YNG1          |
| YFR036W                                          | CDC26         | YLR398C                 | SKI2          |

| Predictions at threshold level 0.80 continued... |               |                         |               |
|--------------------------------------------------|---------------|-------------------------|---------------|
| Gene1 of predicted pair                          |               | Gene2 of predicted pair |               |
| Systematic Name                                  | Standard Name | Systematic Name         | Standard Name |
| YLR360W                                          | VPS38         | YOR035C                 | SHE4          |
| YHR178W                                          | STB5          | YMR055C                 | BUB2          |
| YHR013C                                          | ARD1          | YBL025W                 | RRN10         |
| YDR071C                                          | PAA1          | YKL114C                 | APN1          |
| YMR224C                                          | MRE11         | YHR111W                 | UBA4          |
| YIL036W                                          | CST6          | YGR270W                 | YTA7          |
| YKL048C                                          | ELM1          | YJL117W                 | PHO86         |
| YCL037C                                          | SRO9          | YKR020W                 | VPS51         |
| YBR108W                                          | YBR108W       | YHL002W                 | HSE1          |
| YML112W                                          | CTK3          | YOL054W                 | PSH1          |
| YPR072W                                          | NOT5          | YGR134W                 | CAF130        |
| YBL051C                                          | PIN4          | YOL067C                 | RTG1          |
| YGR104C                                          | SRB5          | YBR289W                 | SNF5          |
| YPR084W                                          | YPR084W       | YOR069W                 | VPS5          |
| YOR035C                                          | SHE4          | YMR089C                 | YTA12         |
| YKL007W                                          | CAP1          | YCR088W                 | ABP1          |
| YOR112W                                          | CEX1          | YPL105C                 | YPL105C       |
| YDR225W                                          | HTA1          | YDR227W                 | SIR4          |
| YFR031C-A                                        | RPL2A         | YDR080W                 | VPS41         |
| YOR144C                                          | ELG1          | YHR056C                 | RSC30         |
| YBR065C                                          | ECM2          | YBR188C                 | NTC20         |
| YPL115C                                          | BEM3          | YLR381W                 | CTF3          |
| YBR194W                                          | SOY1          | YMR202W                 | ERG2          |
| YNL054W                                          | VAC7          | YOL081W                 | IRA2          |
| YDL101C                                          | DUN1          | YER116C                 | SLX8          |
| YOR066W                                          | MSA1          | YJR084W                 | CSN12         |
| YGR105W                                          | VMA21         | YDL192W                 | ARF1          |
| YLR182W                                          | SWI6          | YOL081W                 | IRA2          |
| YLR357W                                          | RSC2          | YNL107W                 | YAF9          |

| Predictions at threshold level 0.80 continued... |               |                         |               |
|--------------------------------------------------|---------------|-------------------------|---------------|
| Gene1 of predicted pair                          |               | Gene2 of predicted pair |               |
| Systematic Name                                  | Standard Name | Systematic Name         | Standard Name |
| YDL065C                                          | PEX19         | YAL055W                 | PEX22         |
| YKL007W                                          | CAP1          | YLR006C                 | SSK1          |
| YHR111W                                          | UBA4          | YJR063W                 | RPA12         |
| YOR043W                                          | WHI2          | YLR094C                 | GIS3          |
| YLR447C                                          | VMA6          | YEL051W                 | VMA8          |
| YIL159W                                          | BNR1          | YOR043W                 | WHI2          |
| YMR095C                                          | SNO1          | YNL333W                 | SNZ2          |
| YHL027W                                          | RIM101        | YMR032W                 | HOF1          |
| YOR106W                                          | VAM3          | YAL002W                 | VPS8          |
| YJL006C                                          | CTK2          | YJR035W                 | RAD26         |
| YNL297C                                          | MON2          | YKL119C                 | VPH2          |
| YMR133W                                          | REC114        | YJL095W                 | BCK1          |
| YOR375C                                          | GDH1          | YOR141C                 | ARP8          |
| YDR440W                                          | DOT1          | YHR167W                 | THP2          |
| YOL018C                                          | TLG2          | YNL107W                 | YAF9          |
| YPL253C                                          | VIK1          | YLR032W                 | RAD5          |
| YKR095W                                          | MLP1          | YJR090C                 | GRR1          |
| YDL059C                                          | RAD59         | YMR231W                 | PEP5          |
| YKR059W                                          | TIF1          | YOL081W                 | IRA2          |
| YNL032W                                          | SIW14         | YBR200W                 | BEM1          |
| YOL062C                                          | APM4          | YJR005W                 | APL1          |
| YBL051C                                          | PIN4          | YDR507C                 | GIN4          |
| YCR034W                                          | FEN1          | YGL019W                 | CKB1          |
| YGR072W                                          | UPF3          | YEL051W                 | VMA8          |
| YIL159W                                          | BNR1          | YDR261C                 | EXG2          |
| YOR290C                                          | SNF2          | YGL025C                 | PGD1          |
| YOR043W                                          | WHI2          | YMR133W                 | REC114        |
| YLR325C                                          | RPL38         | YIL133C                 | RPL16A        |
| YPR131C                                          | NAT3          | YFL023W                 | BUD27         |

| Predictions at threshold level 0.80 continued... |               |                         |               |
|--------------------------------------------------|---------------|-------------------------|---------------|
| Gene1 of predicted pair                          |               | Gene2 of predicted pair |               |
| Systematic Name                                  | Standard Name | Systematic Name         | Standard Name |
| YGR241C                                          | YAP1802       | YJR035W                 | RAD26         |
| YJL154C                                          | VPS35         | YJL004C                 | SYS1          |
| YMR142C                                          | RPL13B        | YMR311C                 | GLC8          |
| YBR173C                                          | UMP1          | YPL161C                 | BEM4          |
| YPL161C                                          | BEM4          | YKL101W                 | HSL1          |
| YDL116W                                          | NUP84         | YJL127C                 | SPT10         |
| YLR095C                                          | IOC2          | YPL024W                 | RMI1          |
| YDR004W                                          | RAD57         | YDL013W                 | SLX5          |
| YFR036W                                          | CDC26         | YLR093C                 | NYV1          |
| YLR452C                                          | SST2          | YOR327C                 | SNC2          |
| YER110C                                          | KAP123        | YAL002W                 | VPS8          |
| YMR016C                                          | SOK2          | YJR032W                 | CPR7          |
| YDR318W                                          | MCM21         | YGL124C                 | MON1          |
| YEL051W                                          | VMA8          | YPL120W                 | VPS30         |
| YER087C-B                                        | SBH1          | YGL244W                 | RTF1          |
| YEL050C                                          | RML2          | YGL115W                 | SNF4          |
| YBR173C                                          | UMP1          | YBR108W                 | YBR108W       |
| YLR399C                                          | BDF1          | YGR270W                 | YTA7          |
| YJR090C                                          | GRR1          | YDR139C                 | RUB1          |
| YNL291C                                          | MID1          | YHR060W                 | VMA22         |
| YNL325C                                          | FIG4          | YHR039C-A               | VMA10         |
| YDR293C                                          | SSD1          | YKR030W                 | GMH1          |
| YOR327C                                          | SNC2          | YNL076W                 | MKS1          |
| YDR004W                                          | RAD57         | YOR038C                 | HIR2          |
| YMR029C                                          | FAR8          | YMR052W                 | FAR3          |
| YDR245W                                          | MNN10         | YHL011C                 | PRS3          |
| YDR225W                                          | HTA1          | YOL148C                 | SPT20         |
| YNL041C                                          | COG6          | YPR032W                 | SRO7          |
| YGL163C                                          | RAD54         | YFR030W                 | MET10         |

| Predictions at threshold level 0.80 continued... |               |                         |               |
|--------------------------------------------------|---------------|-------------------------|---------------|
| Gene1 of predicted pair                          |               | Gene2 of predicted pair |               |
| Systematic Name                                  | Standard Name | Systematic Name         | Standard Name |
| YLR119W                                          | SRN2          | YBR280C                 | SAF1          |
| YDR108W                                          | GSG1          | YMR004W                 | MVP1          |
| YOR195W                                          | SLK19         | YDR378C                 | LSM6          |
| YKL048C                                          | ELM1          | YDL047W                 | SIT4          |
| YOR001W                                          | RRP6          | YNL236W                 | SIN4          |
| YGR019W                                          | UGA1          | YPL253C                 | VIK1          |
| YBR200W                                          | BEM1          | YNL041C                 | COG6          |
| YBR108W                                          | YBR108W       | YKL048C                 | ELM1          |
| YDR174W                                          | HMO1          | YDR439W                 | LRS4          |
| YCL037C                                          | SRO9          | YJR060W                 | CBF1          |
| YPL137C                                          | GIP3          | YLR370C                 | ARC18         |
| YCL037C                                          | SRO9          | YDR378C                 | LSM6          |
| YGL212W                                          | VAM7          | YJR032W                 | CPR7          |
| YNL236W                                          | SIN4          | YGL151W                 | NUT1          |
| YLR181C                                          | VTA1          | YKL002W                 | DID4          |
| YMR026C                                          | PEX12         | YLR320W                 | MMS22         |
| YIL159W                                          | BNR1          | YJR032W                 | CPR7          |
| YGL200C                                          | EMP24         | YLR370C                 | ARC18         |
| YEL053C                                          | MAK10         | YJL190C                 | RPS22A        |
| YMR055C                                          | BUB2          | YDR289C                 | RTT103        |
| YNL297C                                          | MON2          | YNL041C                 | COG6          |
| YCR020C-A                                        | MAK31         | YAR014C                 | BUD14         |
| YJR099W                                          | YUH1          | YLR128W                 | DCN1          |
| YHR039C-A                                        | VMA10         | YGL163C                 | RAD54         |
| YDR156W                                          | RPA14         | YMR038C                 | CCS1          |
| YNR072W                                          | HXT17         | YMR214W                 | SCJ1          |
| YIL034C                                          | CAP2          | YHR012W                 | VPS29         |
| YML103C                                          | NUP188        | YLR079W                 | SIC1          |
| YER162C                                          | RAD4          | YLR398C                 | SKI2          |

| Predictions at threshold level 0.80 continued... |               |                         |               |
|--------------------------------------------------|---------------|-------------------------|---------------|
| Gene1 of predicted pair                          |               | Gene2 of predicted pair |               |
| Systematic Name                                  | Standard Name | Systematic Name         | Standard Name |
| YOR337W                                          | TEA1          | YNL238W                 | KEX2          |
| YER116C                                          | SLX8          | YMR230W                 | RPS10B        |
| YMR142C                                          | RPL13B        | YPL057C                 | SUR1          |
| YDR225W                                          | HTA1          | YDR176W                 | NGG1          |
| YJR024C                                          | MDE1          | YPL256C                 | CLN2          |
| YMR026C                                          | PEX12         | YOL081W                 | IRA2          |
| YER096W                                          | SHC1          | YBR260C                 | RGD1          |
| YCR034W                                          | FEN1          | YLR435W                 | TSR2          |
| YDR137W                                          | RGP1          | YCR053W                 | THR4          |
| YHR119W                                          | SET1          | YDR469W                 | SDC1          |
| YKR001C                                          | VPS1          | YOR035C                 | SHE4          |
| YGL237C                                          | HAP2          | YKL109W                 | HAP4          |
| YGL163C                                          | RAD54         | YAR014C                 | BUD14         |
| YKL126W                                          | YPK1          | YEL060C                 | PRB1          |
| YML112W                                          | CTK3          | YOL081W                 | IRA2          |
| YPL037C                                          | EGD1          | YHR081W                 | LRP1          |
| YIL053W                                          | RHR2          | YNL041C                 | COG6          |
| YJR140C                                          | HIR3          | YDR245W                 | MNN10         |
| YKL048C                                          | ELM1          | YDR264C                 | AKR1          |
| YMR127C                                          | SAS2          | YDL155W                 | CLB3          |
| YNL214W                                          | PEX17         | YAL055W                 | PEX22         |
| YDR174W                                          | HMO1          | YLR254C                 | NDL1          |
| YOR080W                                          | DIA2          | YDR137W                 | RGP1          |
| YER116C                                          | SLX8          | YLR094C                 | GIS3          |
| YHR134W                                          | WSS1          | YPL018W                 | CTF19         |
| YEL053C                                          | MAK10         | YHR039C-A               | VMA10         |
| YOL067C                                          | RTG1          | YDR310C                 | SUM1          |
| YLR386W                                          | VAC14         | YNR072W                 | HXT17         |
| YKR099W                                          | BAS1          | YPR030W                 | CSR2          |

| Predictions at threshold level 0.80 continued... |               |                         |               |
|--------------------------------------------------|---------------|-------------------------|---------------|
| Gene1 of predicted pair                          |               | Gene2 of predicted pair |               |
| Systematic Name                                  | Standard Name | Systematic Name         | Standard Name |
| YLR315W                                          | NKP2          | YOL054W                 | PSH1          |
| YOR039W                                          | CKB2          | YBR009C                 | HHF1          |
| YHR200W                                          | RPN10         | YNL238W                 | KEX2          |
| YNR052C                                          | POP2          | YGR188C                 | BUB1          |
| YLR119W                                          | SRN2          | YER044C                 | ERG28         |
| YLR234W                                          | TOP3          | YLR350W                 | ORM2          |
| YLR357W                                          | RSC2          | YNL030W                 | HHF2          |
| YJR032W                                          | CPR7          | YOL121C                 | RPS19A        |
| YBR042C                                          | CST26         | YGL200C                 | EMP24         |
| YJL095W                                          | BCK1          | YGL253W                 | HXK2          |
| YFR010W                                          | UBP6          | YHR039C-A               | VMA10         |
| YPL161C                                          | BEM4          | YDR155C                 | CPR1          |
| YPL234C                                          | TFP3          | YOL108C                 | INO4          |
| YKR061W                                          | KTR2          | YJR060W                 | CBF1          |
| YLR386W                                          | VAC14         | YGL252C                 | RTG2          |
| YNL127W                                          | FAR11         | YNL051W                 | COG5          |
| YBR217W                                          | ATG12         | YER139C                 | YER139C       |
| YHL011C                                          | PRS3          | YOL081W                 | IRA2          |
| YDL192W                                          | ARF1          | YMR311C                 | GLC8          |
| YLR288C                                          | MEC3          | YOR363C                 | PIP2          |
| YGL134W                                          | PCL10         | YPL240C                 | HSP82         |
| YGL060W                                          | YBP2          | YOR083W                 | WHI5          |
| YLR090W                                          | XDJ1          | YJL183W                 | MNN11         |
| YDR153C                                          | ENT5          | YOL108C                 | INO4          |
| YOR035C                                          | SHE4          | YDL077C                 | VAM6          |
| YNL225C                                          | CNM67         | YOL081W                 | IRA2          |
| YPR084W                                          | YPR084W       | YCR020C-A               | MAK31         |
| YJL060W                                          | BNA3          | YDR171W                 | HSP42         |
| YIL159W                                          | BNR1          | YDL077C                 | VAM6          |

| Predictions at threshold level 0.80 continued... |               |                         |               |
|--------------------------------------------------|---------------|-------------------------|---------------|
| Gene1 of predicted pair                          |               | Gene2 of predicted pair |               |
| Systematic Name                                  | Standard Name | Systematic Name         | Standard Name |
| YDR080W                                          | VPS41         | YDR310C                 | SUM1          |
| YKL048C                                          | ELM1          | YJR032W                 | CPR7          |
| YFR010W                                          | UBP6          | YJR140C                 | HIR3          |
| YMR095C                                          | SNO1          | YPL137C                 | GIP3          |
| YNL032W                                          | SIW14         | YFR036W                 | CDC26         |
| YIL034C                                          | CAP2          | YJL095W                 | BCK1          |
| YOR109W                                          | INP53         | YNR006W                 | VPS27         |
| YDR137W                                          | RGP1          | YBR280C                 | SAF1          |
| YDR456W                                          | NHX1          | YJL095W                 | BCK1          |
| YMR294W                                          | JNM1          | YGL190C                 | CDC55         |
| YGR105W                                          | VMA21         | YKL119C                 | VPH2          |
| YHR178W                                          | STB5          | YDR254W                 | CHL4          |
| YDR004W                                          | RAD57         | YBL008W                 | HIR1          |
| YMR026C                                          | PEX12         | YNL041C                 | COG6          |
| YMR276W                                          | DSK2          | YJR099W                 | YUH1          |
| YMR142C                                          | RPL13B        | YPR030W                 | CSR2          |
| YHR012W                                          | VPS29         | YJL004C                 | SYS1          |
| YHR200W                                          | RPN10         | YMR230W                 | RPS10B        |
| YBR258C                                          | SHG1          | YPL057C                 | SUR1          |
| YDL155W                                          | CLB3          | YBL101C                 | ECM21         |
| YFR040W                                          | SAP155        | YER122C                 | GLO3          |
| YMR216C                                          | SKY1          | YPR032W                 | SRO7          |
| YBR171W                                          | SEC66         | YPL161C                 | BEM4          |
| YEL009C                                          | GCN4          | YLR399C                 | BDF1          |
| YNL201C                                          | PSY2          | YOL081W                 | IRA2          |
| YBR215W                                          | HPC2          | YBR036C                 | CSG2          |
| YNL291C                                          | MID1          | YML028W                 | TSA1          |
| YMR026C                                          | PEX12         | YER162C                 | RAD4          |
| YFR010W                                          | UBP6          | YER139C                 | YER139C       |



| Predictions at threshold level 0.80 continued... |               |                         |               |
|--------------------------------------------------|---------------|-------------------------|---------------|
| Gene1 of predicted pair                          |               | Gene2 of predicted pair |               |
| Systematic Name                                  | Standard Name | Systematic Name         | Standard Name |
| YLR254C                                          | NDL1          | YLR182W                 | SWI6          |
| YPL234C                                          | TFP3          | YAR014C                 | BUD14         |
| YIL008W                                          | URM1          | YAR014C                 | BUD14         |
| YOR270C                                          | VPH1          | YOL081W                 | IRA2          |
| YAL024C                                          | LTE1          | YGR135W                 | PRE9          |
| YOR275C                                          | RIM20         | YJL117W                 | PHO86         |
| YMR109W                                          | MYO5          | YDR254W                 | CHL4          |
| YLR381W                                          | CTF3          | YGL124C                 | MON1          |
| YMR224C                                          | MRE11         | YBR019C                 | GAL10         |
| YOR195W                                          | SLK19         | YDR076W                 | RAD55         |
| YDR379W                                          | RGA2          | YPL161C                 | BEM4          |
| YML016C                                          | PPZ1          | YOL081W                 | IRA2          |
| YNL307C                                          | MCK1          | YOL121C                 | RPS19A        |
| YIL036W                                          | CST6          | YPL152W                 | RRD2          |
| YGR133W                                          | PEX4          | YAL055W                 | PEX22         |
| YOR270C                                          | VPH1          | YLR371W                 | ROM2          |
| YPR046W                                          | MCM16         | YJR084W                 | CSN12         |
| YJR135C                                          | MCM22         | YPR119W                 | CLB2          |
| YLR095C                                          | IOC2          | YOR043W                 | WHI2          |
| YKR001C                                          | VPS1          | YJR058C                 | APS2          |
| YOL121C                                          | RPS19A        | YJR084W                 | CSN12         |
| YDL020C                                          | RPN4          | YNL238W                 | KEX2          |
| YPL253C                                          | VIK1          | YGL003C                 | CDH1          |
| YJL176C                                          | SWI3          | YBL047C                 | EDE1          |
| YDL135C                                          | RDI1          | YDL240W                 | LRG1          |
| YHR119W                                          | SET1          | YLR288C                 | MEC3          |
| YDR202C                                          | RAV2          | YNL238W                 | KEX2          |
| YIL159W                                          | BNR1          | YNL307C                 | MCK1          |
| YAL024C                                          | LTE1          | YKR072C                 | SIS2          |

| Predictions at threshold level 0.80 continued... |               |                         |               |
|--------------------------------------------------|---------------|-------------------------|---------------|
| Gene1 of predicted pair                          |               | Gene2 of predicted pair |               |
| Systematic Name                                  | Standard Name | Systematic Name         | Standard Name |
| YOR127W                                          | RGA1          | YDR155C                 | CPR1          |
| YJL124C                                          | LSM1          | YDR318W                 | MCM21         |
| YJR032W                                          | CPR7          | YGL151W                 | NUT1          |
| YLR234W                                          | TOP3          | YIL008W                 | URM1          |
| YHR206W                                          | SKN7          | YNL027W                 | CRZ1          |
| YFL023W                                          | BUD27         | YDL083C                 | RPS16B        |
| YNL106C                                          | INP52         | YMR055C                 | BUB2          |
| YER110C                                          | KAP123        | YJL190C                 | RPS22A        |
| YPL042C                                          | SSN3          | YBR107C                 | IML3          |
| YPL096C-A                                        | ERI1          | YHR030C                 | SLT2          |
| YHR039C-A                                        | VMA10         | YAR014C                 | BUD14         |
| YNL215W                                          | IES2          | YKL139W                 | CTK1          |
| YER001W                                          | MNN1          | YNL051W                 | COG5          |
| YMR224C                                          | MRE11         | YGL161C                 | YIP5          |
| YOR275C                                          | RIM20         | YHR012W                 | VPS29         |
| YGR135W                                          | PRE9          | YEL036C                 | ANP1          |
| YLR429W                                          | CRN1          | YDL226C                 | GCS1          |
| YMR153W                                          | NUP53         | YPL137C                 | GIP3          |
| YDL006W                                          | PTC1          | YOR036W                 | PEP12         |
| YMR016C                                          | SOK2          | YLR441C                 | RPS1A         |
| YNL206C                                          | RTT106        | YHR111W                 | UBA4          |
| YDR379W                                          | RGA2          | YGL163C                 | RAD54         |
| YDR443C                                          | SSN2          | YMR153W                 | NUP53         |
| YDR323C                                          | PEP7          | YOR036W                 | PEP12         |
| YJL124C                                          | LSM1          | YDR310C                 | SUM1          |
| YFL023W                                          | BUD27         | YNL307C                 | MCK1          |
| YKL080W                                          | VMA5          | YKL041W                 | VPS24         |
| YNL307C                                          | MCK1          | YJR135C                 | MCM22         |
| YDL101C                                          | DUN1          | YMR055C                 | BUB2          |

| Predictions at threshold level 0.80 continued... |               |                         |               |
|--------------------------------------------------|---------------|-------------------------|---------------|
| Gene1 of predicted pair                          |               | Gene2 of predicted pair |               |
| Systematic Name                                  | Standard Name | Systematic Name         | Standard Name |
| YPL105C                                          | YPL105C       | YML001W                 | YPT7          |
| YBR171W                                          | SEC66         | YIL008W                 | URM1          |
| YHR039C-A                                        | VMA10         | YPR030W                 | CSR2          |
| YDL116W                                          | NUP84         | YLR381W                 | CTF3          |
| YDL020C                                          | RPN4          | YPL079W                 | RPL21B        |
| YOR127W                                          | RGA1          | YBR084C-A               | RPL19A        |
| YDR254W                                          | CHL4          | YNL147W                 | LSM7          |
| YBR274W                                          | CHK1          | YLR320W                 | MMS22         |
| YGR159C                                          | NSR1          | YOR141C                 | ARP8          |
| YPL037C                                          | EGD1          | YER044C                 | ERG28         |
| YGR104C                                          | SRB5          | YDL002C                 | NHP10         |
| YGR104C                                          | SRB5          | YDR363W-A               | SEM1          |
| YDR129C                                          | SAC6          | YKR020W                 | VPS51         |
| YBR217W                                          | ATG12         | YMR152W                 | YIM1          |
| YPL057C                                          | SUR1          | YOR124C                 | UBP2          |
| YHR010W                                          | RPL27A        | YOR368W                 | RAD17         |
| YOR001W                                          | RRP6          | YOR124C                 | UBP2          |
| YGR020C                                          | VMA7          | YML001W                 | YPT7          |
| YDR156W                                          | RPA14         | YJL095W                 | BCK1          |
| YLR192C                                          | HCR1          | YLR386W                 | VAC14         |
| YNL238W                                          | KEX2          | YPR030W                 | CSR2          |
| YDR439W                                          | LRS4          | YGL163C                 | RAD54         |
| YLR094C                                          | GIS3          | YCR053W                 | THR4          |
| YDL161W                                          | ENT1          | YJL029C                 | VPS53         |
| YJL172W                                          | CPS1          | YBR019C                 | GAL10         |
| YOR001W                                          | RRP6          | YPL178W                 | CBC2          |
| YAL024C                                          | LTE1          | YHR081W                 | LRP1          |
| YJL124C                                          | LSM1          | YDL155W                 | CLB3          |
| YKL048C                                          | ELM1          | YIR005W                 | IST3          |

| Predictions at threshold level 0.80 continued... |               |                         |               |
|--------------------------------------------------|---------------|-------------------------|---------------|
| Gene1 of predicted pair                          |               | Gene2 of predicted pair |               |
| Systematic Name                                  | Standard Name | Systematic Name         | Standard Name |
| YGL163C                                          | RAD54         | YJL095W                 | BCK1          |
| YFL031W                                          | HAC1          | YDR207C                 | UME6          |
| YML088W                                          | UFO1          | YDR139C                 | RUB1          |
| YGL147C                                          | RPL9A         | YGL212W                 | VAM7          |
| YER139C                                          | YER139C       | YJR084W                 | CSN12         |
| YPL253C                                          | VIK1          | YJL183W                 | MNN11         |
| YMR038C                                          | CCS1          | YNL107W                 | YAF9          |
| YBR108W                                          | YBR108W       | YMR016C                 | SOK2          |
| YMR167W                                          | MLH1          | YNL076W                 | MKS1          |
| YGR108W                                          | CLB1          | YGR054W                 | YGR054W       |
| YLR337C                                          | VRP1          | YKR020W                 | VPS51         |
| YMR016C                                          | SOK2          | YGL003C                 | CDH1          |
| YPL161C                                          | BEM4          | YJR084W                 | CSN12         |
| YDR334W                                          | SWR1          | YBR089C-A               | NHP6B         |
| YMR231W                                          | PEP5          | YDL077C                 | VAM6          |
| YLR234W                                          | TOP3          | YOL081W                 | IRA2          |
| YDR137W                                          | RGP1          | YMR054W                 | STV1          |
| YCR066W                                          | RAD18         | YER122C                 | GLO3          |
| YNL068C                                          | FKH2          | YDL047W                 | SIT4          |
| YPL018W                                          | CTF19         | YEL056W                 | HAT2          |
| YGL212W                                          | VAM7          | YDR153C                 | ENT5          |
| YML016C                                          | PPZ1          | YLR429W                 | CRN1          |
| YDL006W                                          | PTC1          | YDR153C                 | ENT5          |
| YJL136C                                          | RPS21B        | YDR379W                 | RGA2          |
| YCR065W                                          | HCM1          | YER114C                 | BOI2          |
| YIL159W                                          | BNR1          | YBR019C                 | GAL10         |
| YBL008W                                          | HIR1          | YKR072C                 | SIS2          |
| YHR060W                                          | VMA22         | YML001W                 | YPT7          |
| YNL307C                                          | MCK1          | YPR120C                 | CLB5          |

| Predictions at threshold level 0.80 continued... |               |                         |               |
|--------------------------------------------------|---------------|-------------------------|---------------|
| Gene1 of predicted pair                          |               | Gene2 of predicted pair |               |
| Systematic Name                                  | Standard Name | Systematic Name         | Standard Name |
| YOR290C                                          | SNF2          | YNR072W                 | HXT17         |
| YLR386W                                          | VAC14         | YNL225C                 | CNM67         |
| YNL288W                                          | CAF40         | YGR134W                 | CAF130        |
| YML016C                                          | PPZ1          | YOR358W                 | HAP5          |
| YCR077C                                          | PAT1          | YAL002W                 | VPS8          |
| YJL176C                                          | SWI3          | YBR057C                 | MUM2          |
| YDR477W                                          | SNF1          | YLR370C                 | ARC18         |
| YML001W                                          | YPT7          | YCR053W                 | THR4          |
| YMR224C                                          | MRE11         | YDR439W                 | LRS4          |
| YOR132W                                          | VPS17         | YBR171W                 | SEC66         |
| YLR288C                                          | MEC3          | YER162C                 | RAD4          |
| YLR234W                                          | TOP3          | YGR184C                 | UBR1          |
| YDR422C                                          | SIP1          | YJR090C                 | GRR1          |
| YOR275C                                          | RIM20         | YKL041W                 | VPS24         |
| YKL116C                                          | PRR1          | YBL103C                 | RTG3          |
| YER110C                                          | KAP123        | YGR054W                 | YGR054W       |
| YBL008W                                          | HIR1          | YJR032W                 | CPR7          |
| YER116C                                          | SLX8          | YOR290C                 | SNF2          |
| YJL210W                                          | PEX2          | YGR077C                 | PEX8          |
| YMR273C                                          | ZDS1          | YPL256C                 | CLN2          |
| YOR035C                                          | SHE4          | YLR370C                 | ARC18         |
| YCR081W                                          | SRB8          | YLR371W                 | ROM2          |
| YBR171W                                          | SEC66         | YLR398C                 | SKI2          |
| YML094W                                          | GIM5          | YEL022W                 | GEA2          |
| YBL102W                                          | SFT2          | YOR069W                 | VPS5          |
| YEL027W                                          | CUP5          | YHR060W                 | VMA22         |
| YHR134W                                          | WSS1          | YHR111W                 | UBA4          |
| YMR026C                                          | PEX12         | YBL103C                 | RTG3          |
| YKR020W                                          | VPS51         | YER122C                 | GLO3          |

| Predictions at threshold level 0.80 continued... |               |                         |               |
|--------------------------------------------------|---------------|-------------------------|---------------|
| Gene1 of predicted pair                          |               | Gene2 of predicted pair |               |
| Systematic Name                                  | Standard Name | Systematic Name         | Standard Name |
| YPL234C                                          | TFP3          | YPR032W                 | SRO7          |
| YDR108W                                          | GSG1          | YPR051W                 | MAK3          |
| YIL162W                                          | SUC2          | YEL036C                 | ANP1          |
| YGR249W                                          | MGA1          | YNL238W                 | KEX2          |
| YDR103W                                          | STE5          | YDR309C                 | GIC2          |
| YMR199W                                          | CLN1          | YPL158C                 | YPL158C       |
| YLR094C                                          | GIS3          | YMR214W                 | SCJ1          |
| YPR131C                                          | NAT3          | YPL106C                 | SSE1          |
| YLR386W                                          | VAC14         | YOR270C                 | VPH1          |
| YNL025C                                          | SSN8          | YBL075C                 | SSA3          |
| YMR142C                                          | RPL13B        | YFR036W                 | CDC26         |
| YGL095C                                          | VPS45         | YDL047W                 | SIT4          |
| YGL087C                                          | MMS2          | YJL190C                 | RPS22A        |
| YMR253C                                          | YMR253C       | YHR114W                 | BZZ1          |
| YDR448W                                          | ADA2          | YBL003C                 | HTA2          |
| YBR171W                                          | SEC66         | YPL137C                 | GIP3          |
| YKL204W                                          | EAP1          | YKL213C                 | DOA1          |
| YOR106W                                          | VAM3          | YGL223C                 | COG1          |
| YBR200W                                          | BEM1          | YJL058C                 | BIT61         |
| YJL053W                                          | PEP8          | YPL195W                 | APL5          |
| YCR053W                                          | THR4          | YEL060C                 | PRB1          |
| YMR142C                                          | RPL13B        | YOL081W                 | IRA2          |
| YDL116W                                          | NUP84         | YNL016W                 | PUB1          |
| YMR199W                                          | CLN1          | YJL136C                 | RPS21B        |
| YBR127C                                          | VMA2          | YGL095C                 | VPS45         |
| YOR043W                                          | WHI2          | YER122C                 | GLO3          |
| YDL002C                                          | NHP10         | YCR086W                 | CSM1          |
| YML115C                                          | VAN1          | YDR137W                 | RGP1          |
| YOR141C                                          | ARP8          | YAR014C                 | BUD14         |

| Predictions at threshold level 0.80 continued... |               |                         |               |
|--------------------------------------------------|---------------|-------------------------|---------------|
| Gene1 of predicted pair                          |               | Gene2 of predicted pair |               |
| Systematic Name                                  | Standard Name | Systematic Name         | Standard Name |
| YPR018W                                          | RLF2          | YKL160W                 | ELF1          |
| YPR120C                                          | CLB5          | YPL158C                 | YPL158C       |
| YOR312C                                          | RPL20B        | YDR310C                 | SUM1          |
| YER129W                                          | SAK1          | YMR199W                 | CLN1          |
| YML117W                                          | NAB6          | YLR320W                 | MMS22         |
| YDR245W                                          | MNN10         | YMR109W                 | MYO5          |
| YBR200W                                          | BEM1          | YDL226C                 | GCS1          |
| YNL288W                                          | CAF40         | YBR114W                 | RAD16         |
| YKL139W                                          | CTK1          | YAL002W                 | VPS8          |
| YLR360W                                          | VPS38         | YJL053W                 | PEP8          |
| YMR153W                                          | NUP53         | YGL124C                 | MON1          |
| YNL106C                                          | INP52         | YNL215W                 | IES2          |
| YHR086W                                          | NAM8          | YPR101W                 | SNT309        |
| YDR443C                                          | SSN2          | YOR290C                 | SNF2          |
| YNL307C                                          | MCK1          | YMR167W                 | MLH1          |
| YIL076W                                          | SEC28         | YGL124C                 | MON1          |
| YJL124C                                          | LSM1          | YOL081W                 | IRA2          |
| YPL161C                                          | BEM4          | YPL234C                 | TFP3          |
| YFL031W                                          | HAC1          | YCR053W                 | THR4          |
| YKR020W                                          | VPS51         | YMR038C                 | CCS1          |
| YML103C                                          | NUP188        | YCR024C-A               | PMP1          |
| YOR332W                                          | VMA4          | YML115C                 | VAN1          |
| YOR066W                                          | MSA1          | YJL095W                 | BCK1          |
| YMR172W                                          | HOT1          | YHR111W                 | UBA4          |
| YHR060W                                          | VMA22         | YNL041C                 | COG6          |
| YPL037C                                          | EGD1          | YOL111C                 | MDY2          |
| YLR386W                                          | VAC14         | YDL006W                 | PTC1          |
| YML102W                                          | CAC2          | YJR090C                 | GRR1          |
| YMR199W                                          | CLN1          | YHR158C                 | KEL1          |

| Predictions at threshold level 0.80 continued... |               |                         |               |
|--------------------------------------------------|---------------|-------------------------|---------------|
| Gene1 of predicted pair                          |               | Gene2 of predicted pair |               |
| Systematic Name                                  | Standard Name | Systematic Name         | Standard Name |
| YOR132W                                          | VPS17         | YDR310C                 | SUM1          |
| YMR133W                                          | REC114        | YEL060C                 | PRB1          |
| YDR108W                                          | GSG1          | YPR032W                 | SRO7          |
| YOR127W                                          | RGA1          | YDR363W-A               | SEM1          |
| YPL022W                                          | RAD1          | YMR199W                 | CLN1          |
| YHR200W                                          | RPN10         | YMR276W                 | DSK2          |
| YNL307C                                          | MCK1          | YOR014W                 | RTS1          |
| YBR200W                                          | BEM1          | YOR001W                 | RRP6          |
| YML016C                                          | PPZ1          | YNL307C                 | MCK1          |
| YIL034C                                          | CAP2          | YPL050C                 | MNN9          |
| YLR191W                                          | PEX13         | YIL160C                 | POT1          |
| YNL238W                                          | KEX2          | YMR038C                 | CCS1          |
| YOR195W                                          | SLK19         | YKR048C                 | NAP1          |
| YGL115W                                          | SNF4          | YOL108C                 | INO4          |
| YNL025C                                          | SSN8          | YDR245W                 | MNN10         |
| YMR127C                                          | SAS2          | YPL253C                 | VIK1          |
| YNL201C                                          | PSY2          | YPR120C                 | CLB5          |
| YOR132W                                          | VPS17         | YOR112W                 | CEX1          |
| YOR337W                                          | TEA1          | YNL307C                 | MCK1          |
| YDR260C                                          | SWM1          | YPR119W                 | CLB2          |
| YHR134W                                          | WSS1          | YGR188C                 | BUB1          |
| YLR119W                                          | SRN2          | YGL003C                 | CDH1          |
| YDR137W                                          | RGP1          | YDR310C                 | SUM1          |
| YNL069C                                          | RPL16B        | YGR020C                 | VMA7          |
| YOR332W                                          | VMA4          | YMR070W                 | MOT3          |
| YKL025C                                          | PAN3          | YPL018W                 | CTF19         |
| YOR023C                                          | AHC1          | YGL253W                 | HXK2          |
| YHR200W                                          | RPN10         | YAR014C                 | BUD14         |
| YKR014C                                          | YPT52         | YPR028W                 | YOP1          |



| Predictions at threshold level 0.80 continued... |               |                         |               |
|--------------------------------------------------|---------------|-------------------------|---------------|
| Gene1 of predicted pair                          |               | Gene2 of predicted pair |               |
| Systematic Name                                  | Standard Name | Systematic Name         | Standard Name |
| YLR337C                                          | VRP1          | YCR086W                 | CSM1          |
| YMR224C                                          | MRE11         | YLR150W                 | STM1          |
| YIL148W                                          | RPL40A        | YMR125W                 | STO1          |
| YFR031C-A                                        | RPL2A         | YML038C                 | YMD8          |
| YOR290C                                          | SNF2          | YNL041C                 | COG6          |
| YMR172W                                          | HOT1          | YJL095W                 | BCK1          |
| YOL126C                                          | MDH2          | YFL047W                 | RGD2          |
| YDR146C                                          | SWI5          | YLR425W                 | TUS1          |
| YFR010W                                          | UBP6          | YBR030W                 | YBR030W       |
| YMR224C                                          | MRE11         | YLR410W                 | VIP1          |
| YFL013C                                          | IES1          | YIL076W                 | SEC28         |
| YKL032C                                          | IXR1          | YPL161C                 | BEM4          |
| YER044C                                          | ERG28         | YOR043W                 | WHI2          |
| YPL115C                                          | BEM3          | YJR032W                 | CPR7          |
| YHL020C                                          | OPI1          | YEL051W                 | VMA8          |
| YER110C                                          | KAP123        | YNL166C                 | BNI5          |
| YBR030W                                          | YBR030W       | YBR280C                 | SAF1          |
| YNL215W                                          | IES2          | YJL183W                 | MNN11         |
| YBR194W                                          | SOY1          | YDR363W-A               | SEM1          |
| YLR386W                                          | VAC14         | YMR142C                 | RPL13B        |
| YFR010W                                          | UBP6          | YKR030W                 | GMH1          |
| YJR056C                                          | YJR056C       | YMR214W                 | SCJ1          |
| YNL297C                                          | MON2          | YHR115C                 | DMA1          |
| YGR104C                                          | SRB5          | YGR135W                 | PRE9          |
| YHR039C-A                                        | VMA10         | YJL095W                 | BCK1          |
| YDR477W                                          | SNF1          | YDR207C                 | UME6          |
| YDL020C                                          | RPN4          | YNL107W                 | YAF9          |
| YBR108W                                          | YBR108W       | YNL307C                 | MCK1          |
| YMR216C                                          | SKY1          | YKR001C                 | VPS1          |

| Predictions at threshold level 0.80 continued... |               |                         |               |
|--------------------------------------------------|---------------|-------------------------|---------------|
| Gene1 of predicted pair                          |               | Gene2 of predicted pair |               |
| Systematic Name                                  | Standard Name | Systematic Name         | Standard Name |
| YNL236W                                          | SIN4          | YJR005W                 | APL1          |
| YNL087W                                          | TCB2          | YDR358W                 | GGA1          |
| YIR005W                                          | IST3          | YOR124C                 | UBP2          |
| YJR084W                                          | CSN12         | YGR188C                 | BUB1          |
| YPL256C                                          | CLN2          | YHL011C                 | PRS3          |
| YOR064C                                          | YNG1          | YNL030W                 | HHF2          |
| YHR156C                                          | LIN1          | YLR320W                 | MMS22         |
| YPL024W                                          | RMI1          | YEL053C                 | MAK10         |
| YDL160C                                          | DHH1          | YPL256C                 | CLN2          |
| YPL115C                                          | BEM3          | YJR090C                 | GRR1          |
| YNL201C                                          | PSY2          | YNL054W                 | VAC7          |
| YHR111W                                          | UBA4          | YJL190C                 | RPS22A        |
| YGR072W                                          | UPF3          | YNL107W                 | YAF9          |
| YPR051W                                          | MAK3          | YGL115W                 | SNF4          |
| YML095C                                          | RAD10         | YGR135W                 | PRE9          |
| YPR017C                                          | DSS4          | YML038C                 | YMD8          |
| YNL307C                                          | MCK1          | YMR133W                 | REC114        |
| YKL126W                                          | YPK1          | YPR030W                 | CSR2          |
| YHR156C                                          | LIN1          | YER162C                 | RAD4          |
| YER162C                                          | RAD4          | YDL077C                 | VAM6          |
| YDR477W                                          | SNF1          | YPL248C                 | GAL4          |
| YBR173C                                          | UMP1          | YLR398C                 | SKI2          |
| YML016C                                          | PPZ1          | YGL115W                 | SNF4          |
| YHR200W                                          | RPN10         | YDR469W                 | SDC1          |
| YDR254W                                          | CHL4          | YHR115C                 | DMA1          |
| YBR057C                                          | MUM2          | YGL163C                 | RAD54         |
| YDR443C                                          | SSN2          | YDR358W                 | GGA1          |
| YDR004W                                          | RAD57         | YPL057C                 | SUR1          |
| YLR095C                                          | IOC2          | YPL137C                 | GIP3          |

| Predictions at threshold level 0.80 continued... |               |                         |               |
|--------------------------------------------------|---------------|-------------------------|---------------|
| Gene1 of predicted pair                          |               | Gene2 of predicted pair |               |
| Systematic Name                                  | Standard Name | Systematic Name         | Standard Name |
| YFR010W                                          | UBP6          | YMR214W                 | SCJ1          |
| YBR290W                                          | BSD2          | YER110C                 | KAP123        |
| YIL076W                                          | SEC28         | YNR032W                 | PPG1          |
| YKR099W                                          | BAS1          | YLR398C                 | SKI2          |
| YNL291C                                          | MID1          | YGL115W                 | SNF4          |
| YMR224C                                          | MRE11         | YOR014W                 | RTS1          |
| YMR026C                                          | PEX12         | YBR108W                 | YBR108W       |
| YOR270C                                          | VPH1          | YKL126W                 | YPK1          |
| YPL057C                                          | SUR1          | YKL048C                 | ELM1          |
| YLR234W                                          | TOP3          | YPL057C                 | SUR1          |
| YDL005C                                          | MED2          | YLR182W                 | SWI6          |
| YMR026C                                          | PEX12         | YOL044W                 | PEX15         |
| YKL007W                                          | CAP1          | YAL024C                 | LTE1          |
| YCL001W                                          | RER1          | YER162C                 | RAD4          |
| YMR142C                                          | RPL13B        | YDR484W                 | VPS52         |
| YNL291C                                          | MID1          | YOR109W                 | INP53         |
| YEL060C                                          | PRB1          | YDR310C                 | SUM1          |
| YOR023C                                          | AHC1          | YBL021C                 | HAP3          |
| YLR381W                                          | CTF3          | YEL056W                 | HAT2          |
| YDR156W                                          | RPA14         | YMR224C                 | MRE11         |
| YGR252W                                          | GCN5          | YOL148C                 | SPT20         |
| YNL307C                                          | MCK1          | YKR001C                 | VPS1          |
| YDR192C                                          | NUP42         | YBR017C                 | KAP104        |
| YDL101C                                          | DUN1          | YOL090W                 | MSH2          |
| YNL288W                                          | CAF40         | YNR052C                 | POP2          |
| YMR016C                                          | SOK2          | YLR320W                 | MMS22         |
| YKL116C                                          | PRR1          | YER044C                 | ERG28         |
| YPR051W                                          | MAK3          | YML038C                 | YMD8          |
| YNL041C                                          | COG6          | YJL095W                 | BCK1          |

| Predictions at threshold level 0.80 continued... |               |                         |               |
|--------------------------------------------------|---------------|-------------------------|---------------|
| Gene1 of predicted pair                          |               | Gene2 of predicted pair |               |
| Systematic Name                                  | Standard Name | Systematic Name         | Standard Name |
| YOR112W                                          | CEX1          | YEL053C                 | MAK10         |
| YOL030W                                          | GAS5          | YBR082C                 | UBC4          |
| YDR329C                                          | PEX3          | YOL147C                 | PEX11         |
| YPL024W                                          | RMI1          | YOL111C                 | MDY2          |
| YHR060W                                          | VMA22         | YDL083C                 | RPS16B        |
| YDR108W                                          | GSG1          | YJL036W                 | SNX4          |
| YOR001W                                          | RRP6          | YCR077C                 | PAT1          |
| YHR134W                                          | WSS1          | YNL016W                 | PUB1          |
| YFR010W                                          | UBP6          | YOR124C                 | UBP2          |
| YHL020C                                          | OPI1          | YNL051W                 | COG5          |
| YBR217W                                          | ATG12         | YLR386W                 | VAC14         |
| YNL116W                                          | DMA2          | YGL031C                 | RPL24A        |
| YMR055C                                          | BUB2          | YCR086W                 | CSM1          |
| YNL238W                                          | KEX2          | YBR036C                 | CSG2          |
| YLR090W                                          | XDJ1          | YLR320W                 | MMS22         |
| YOR368W                                          | RAD17         | YNL107W                 | YAF9          |
| YBL008W                                          | HIR1          | YLR079W                 | SIC1          |
| YNL032W                                          | SIW14         | YER139C                 | YER139C       |
| YMR198W                                          | CIK1          | YPR119W                 | CLB2          |
| YNL087W                                          | TCB2          | YJL095W                 | BCK1          |
| YER115C                                          | SPR6          | YPL178W                 | CBC2          |
| YIR009W                                          | MSL1          | YDR184C                 | ATC1          |
| YFL013C                                          | IES1          | YOR124C                 | UBP2          |
| YBL008W                                          | HIR1          | YNL107W                 | YAF9          |
| YBL058W                                          | SHP1          | YBR036C                 | CSG2          |
| YDR484W                                          | VPS52         | YOL111C                 | MDY2          |
| YMR198W                                          | CIK1          | YLR058C                 | SHM2          |
| YFL023W                                          | BUD27         | YPL256C                 | CLN2          |
| YEL053C                                          | MAK10         | YGR188C                 | BUB1          |

| Predictions at threshold level 0.80 continued... |               |                         |               |
|--------------------------------------------------|---------------|-------------------------|---------------|
| Gene1 of predicted pair                          |               | Gene2 of predicted pair |               |
| Systematic Name                                  | Standard Name | Systematic Name         | Standard Name |
| YLR377C                                          | FBP1          | YNR065C                 | YNR065C       |
| YOR069W                                          | VPS5          | YKR020W                 | VPS51         |
| YLR079W                                          | SIC1          | YGL115W                 | SNF4          |
| YDL083C                                          | RPS16B        | YFR036W                 | CDC26         |
| YLR119W                                          | SRN2          | YMR142C                 | RPL13B        |
| YEL065W                                          | SIT1          | YOL121C                 | RPS19A        |
| YBR171W                                          | SEC66         | YPL227C                 | ALG5          |
| YFR010W                                          | UBP6          | YLR371W                 | ROM2          |
| YHR084W                                          | STE12         | YDL159W                 | STE7          |
| YJR135C                                          | MCM22         | YLR370C                 | ARC18         |
| YLR452C                                          | SST2          | YDR289C                 | RTT103        |
| YHR056C                                          | RSC30         | YCL061C                 | MRC1          |
| YOR127W                                          | RGA1          | YCL001W                 | RER1          |
| YMR055C                                          | BUB2          | YPR119W                 | CLB2          |
| YDR289C                                          | RTT103        | YML112W                 | CTK3          |
| YGR188C                                          | BUB1          | YAL002W                 | VPS8          |
| YGR252W                                          | GCN5          | YEL056W                 | HAT2          |
| YBR200W                                          | BEM1          | YFR036W                 | CDC26         |
| YFL013C                                          | IES1          | YAL002W                 | VPS8          |
| YJR135C                                          | MCM22         | YJL095W                 | BCK1          |
| YOL111C                                          | MDY2          | YJL183W                 | MNN11         |
| YDR335W                                          | MSN5          | YCR077C                 | PAT1          |
| YDR225W                                          | HTA1          | YDL155W                 | CLB3          |
| YDR320C                                          | SWA2          | YOL108C                 | INO4          |
| YPL234C                                          | TFP3          | YMR054W                 | STV1          |
| YGL078C                                          | DBP3          | YJL172W                 | CPS1          |
| YHR156C                                          | LIN1          | YOR327C                 | SNC2          |
| YJL136C                                          | RPS21B        | YOR275C                 | RIM20         |
| YOR033C                                          | EXO1          | YDR076W                 | RAD55         |

| Predictions at threshold level 0.80 continued... |               |                         |               |
|--------------------------------------------------|---------------|-------------------------|---------------|
| Gene1 of predicted pair                          |               | Gene2 of predicted pair |               |
| Systematic Name                                  | Standard Name | Systematic Name         | Standard Name |
| YNL106C                                          | INP52         | YCR088W                 | ABP1          |
| YLR399C                                          | BDF1          | YCR086W                 | CSM1          |
| YLR119W                                          | SRN2          | YKL126W                 | YPK1          |
| YML115C                                          | VAN1          | YMR230W                 | RPS10B        |
| YFR010W                                          | UBP6          | YGR232W                 | NAS6          |
| YHR012W                                          | VPS29         | YJL183W                 | MNN11         |
| YGR105W                                          | VMA21         | YJL183W                 | MNN11         |
| YPL024W                                          | RMI1          | YOR337W                 | TEA1          |
| YLR058C                                          | SHM2          | YDL226C                 | GCS1          |
| YLR148W                                          | PEP3          | YDL161W                 | ENT1          |
| YMR224C                                          | MRE11         | YDL002C                 | NHP10         |
| YPL086C                                          | ELP3          | YHR187W                 | IKI1          |
| YPR018W                                          | RLF2          | YLR352W                 | YLR352W       |
| YEL053C                                          | MAK10         | YHR012W                 | VPS29         |
| YDR245W                                          | MNN10         | YPL161C                 | BEM4          |
| YPR051W                                          | MAK3          | YNL107W                 | YAF9          |
| YJL183W                                          | MNN11         | YDR207C                 | UME6          |
| YLR360W                                          | VPS38         | YJR084W                 | CSN12         |
| YMR153W                                          | NUP53         | YBR036C                 | CSG2          |
| YBL102W                                          | SFT2          | YOR112W                 | CEX1          |
| YOR270C                                          | VPH1          | YBR036C                 | CSG2          |
| YPL195W                                          | APL5          | YNL076W                 | MKS1          |
| YLR095C                                          | IOC2          | YDR477W                 | SNF1          |
| YCR077C                                          | PAT1          | YEL013W                 | VAC8          |
| YBL058W                                          | SHP1          | YDL083C                 | RPS16B        |
| YPR046W                                          | MCM16         | YLR370C                 | ARC18         |
| YCL037C                                          | SRO9          | YKL213C                 | DOA1          |
| YHL020C                                          | OPI1          | YML071C                 | COG8          |
| YLR191W                                          | PEX13         | YKL041W                 | VPS24         |

| Predictions at threshold level 0.80 continued... |               |                         |               |
|--------------------------------------------------|---------------|-------------------------|---------------|
| Gene1 of predicted pair                          |               | Gene2 of predicted pair |               |
| Systematic Name                                  | Standard Name | Systematic Name         | Standard Name |
| YIL002C                                          | INP51         | YMR070W                 | MOT3          |
| YOR026W                                          | BUB3          | YGL190C                 | CDC55         |
| YOR023C                                          | AHC1          | YPL018W                 | CTF19         |
| YBR030W                                          | YBR030W       | YDR137W                 | RGP1          |
| YKL126W                                          | YPK1          | YER044C                 | ERG28         |
| YDL192W                                          | ARF1          | YLR398C                 | SKI2          |
| YBR030W                                          | YBR030W       | YLR441C                 | RPS1A         |
| YIL053W                                          | RHR2          | YBL025W                 | RRN10         |
| YLR452C                                          | SST2          | YBR280C                 | SAF1          |
| YDR443C                                          | SSN2          | YFL028C                 | CAF16         |
| YLR447C                                          | VMA6          | YGR188C                 | BUB1          |
| YOR106W                                          | VAM3          | YDR310C                 | SUM1          |
| YEL027W                                          | CUP5          | YPL234C                 | TFP3          |
| YGR105W                                          | VMA21         | YEL051W                 | VMA8          |
| YLR360W                                          | VPS38         | YOR112W                 | CEX1          |
| YMR224C                                          | MRE11         | YNL225C                 | CNM67         |
| YNL032W                                          | SIW14         | YNL238W                 | KEX2          |
| YLR094C                                          | GIS3          | YHR039C-A               | VMA10         |
| YLR102C                                          | APC9          | YFR036W                 | CDC26         |
| YNL106C                                          | INP52         | YKL048C                 | ELM1          |
| YJL140W                                          | RPB4          | YNL030W                 | HHF2          |
| YNR052C                                          | POP2          | YDR318W                 | MCM21         |
| YNL199C                                          | GCR2          | YGR270W                 | YTA7          |
| YBR108W                                          | YBR108W       | YLR180W                 | SAM1          |
| YDL101C                                          | DUN1          | YNR052C                 | POP2          |
| YPL194W                                          | DDC1          | YGL100W                 | SEH1          |
| YKR046C                                          | PET10         | YMR152W                 | YIM1          |
| YDR443C                                          | SSN2          | YCR053W                 | THR4          |
| YLR381W                                          | CTF3          | YPR046W                 | MCM16         |

| Predictions at threshold level 0.80 continued... |               |                         |               |
|--------------------------------------------------|---------------|-------------------------|---------------|
| Gene1 of predicted pair                          |               | Gene2 of predicted pair |               |
| Systematic Name                                  | Standard Name | Systematic Name         | Standard Name |
| YEL056W                                          | HAT2          | YAL002W                 | VPS8          |
| YDR200C                                          | VPS64         | YJR035W                 | RAD26         |
| YHR200W                                          | RPN10         | YMR133W                 | REC114        |
| YIL076W                                          | SEC28         | YER144C                 | UBP5          |
| YLR398C                                          | SKI2          | YMR230W                 | RPS10B        |
| YML013W                                          | UBX2          | YLR032W                 | RAD5          |
| YOR358W                                          | HAP5          | YHR012W                 | VPS29         |
| YDR129C                                          | SAC6          | YDR440W                 | DOT1          |
| YOR140W                                          | SFL1          | YNL236W                 | SIN4          |
| YLR095C                                          | IOC2          | YDR358W                 | GGA1          |
| YAL024C                                          | LTE1          | YJL006C                 | CTK2          |
| YKL139W                                          | CTK1          | YDL002C                 | NHP10         |
| YIR005W                                          | IST3          | YDR318W                 | MCM21         |
| YLR429W                                          | CRN1          | YOL091W                 | SPO21         |
| YPR051W                                          | MAK3          | YHR039C-A               | VMA10         |
| YKL101W                                          | HSL1          | YDL047W                 | SIT4          |
| YOL126C                                          | MDH2          | YMR125W                 | STO1          |
| YER144C                                          | UBP5          | YGL003C                 | CDH1          |
| YLR090W                                          | XDJ1          | YJL172W                 | CPS1          |
| YLR234W                                          | TOP3          | YKL114C                 | APN1          |
| YDR477W                                          | SNF1          | YDR261C                 | EXG2          |
| YPL024W                                          | RMI1          | YPL018W                 | CTF19         |
| YLR399C                                          | BDF1          | YPL018W                 | CTF19         |
| YPR046W                                          | MCM16         | YDR200C                 | VPS64         |
| YNL106C                                          | INP52         | YOL081W                 | IRA2          |
| YPL024W                                          | RMI1          | YKR035W-A               | DID2          |
| YAL024C                                          | LTE1          | YNL215W                 | IES2          |
| YPR131C                                          | NAT3          | YBR200W                 | BEM1          |
| YLR191W                                          | PEX13         | YOL044W                 | PEX15         |



| Predictions at threshold level 0.80 continued... |               |                         |               |
|--------------------------------------------------|---------------|-------------------------|---------------|
| Gene1 of predicted pair                          |               | Gene2 of predicted pair |               |
| Systematic Name                                  | Standard Name | Systematic Name         | Standard Name |
| YPL042C                                          | SSN3          | YCR077C                 | PAT1          |
| YLR095C                                          | IOC2          | YER139C                 | YER139C       |
| YPL042C                                          | SSN3          | YMR198W                 | CIK1          |
| YKL048C                                          | ELM1          | YDR130C                 | FIN1          |
| YDL185W                                          | TFP1          | YLR452C                 | SST2          |
| YIL008W                                          | URM1          | YJR135C                 | MCM22         |
| YJR032W                                          | CPR7          | YER040W                 | GLN3          |
| YLR452C                                          | SST2          | YER162C                 | RAD4          |
| YKR046C                                          | PET10         | YKL140W                 | TGL1          |
| YDR254W                                          | CHL4          | YGR270W                 | YTA7          |
| YDR383C                                          | NKP1          | YOL081W                 | IRA2          |
| YAR042W                                          | SWH1          | YHR195W                 | NVJ1          |
| YGL163C                                          | RAD54         | YEL056W                 | HAT2          |
| YJR024C                                          | MDE1          | YER110C                 | KAP123        |
| YLR093C                                          | NYV1          | YDR358W                 | GGA1          |
| YPR072W                                          | NOT5          | YBR009C                 | HHF1          |
| YFR030W                                          | MET10         | YDR289C                 | RTT103        |
| YBR200W                                          | BEM1          | YNL236W                 | SIN4          |
| YDR245W                                          | MNN10         | YER096W                 | SHC1          |
| YER110C                                          | KAP123        | YDL155W                 | CLB3          |
| YGL147C                                          | RPL9A         | YJR056C                 | YJR056C       |
| YOR332W                                          | VMA4          | YNL238W                 | KEX2          |
| YDR484W                                          | VPS52         | YBR036C                 | CSG2          |
| YNL087W                                          | TCB2          | YLR093C                 | NYV1          |
| YOR290C                                          | SNF2          | YOL081W                 | IRA2          |
| YDR379W                                          | RGA2          | YGL031C                 | RPL24A        |
| YIL076W                                          | SEC28         | YDR245W                 | MNN10         |
| YPL024W                                          | RMI1          | YGL087C                 | MMS2          |
| YKL126W                                          | YPK1          | YML001W                 | YPT7          |

| Predictions at threshold level 0.80 continued... |               |                         |               |
|--------------------------------------------------|---------------|-------------------------|---------------|
| Gene1 of predicted pair                          |               | Gene2 of predicted pair |               |
| Systematic Name                                  | Standard Name | Systematic Name         | Standard Name |
| YDR137W                                          | RGP1          | YNR072W                 | HXT17         |
| YHL031C                                          | GOS1          | YNL051W                 | COG5          |
| YDR261C                                          | EXG2          | YER162C                 | RAD4          |
| YGR019W                                          | UGA1          | YIL008W                 | URM1          |
| YML095C                                          | RAD10         | YOL090W                 | MSH2          |
| YBL019W                                          | APN2          | YCR066W                 | RAD18         |
| YPR120C                                          | CLB5          | YOR014W                 | RTS1          |
| YKL025C                                          | PAN3          | YOR358W                 | HAP5          |
| YCR086W                                          | CSM1          | YPL018W                 | CTF19         |
| YLR381W                                          | CTF3          | YER110C                 | KAP123        |
| YLR386W                                          | VAC14         | YGL163C                 | RAD54         |
| YDR383C                                          | NKP1          | YAR014C                 | BUD14         |
| YBR019C                                          | GAL10         | YDR310C                 | SUM1          |
| YLR288C                                          | MEC3          | YGL003C                 | CDH1          |
| YLR006C                                          | SSK1          | YCR073C                 | SSK22         |
| YEL065W                                          | SIT1          | YDR484W                 | VPS52         |
| YBR030W                                          | YBR030W       | YFR036W                 | CDC26         |
| YBR057C                                          | MUM2          | YDR363W-A               | SEM1          |
| YLR182W                                          | SWI6          | YGL252C                 | RTG2          |
| YJR140C                                          | HIR3          | YLR435W                 | TSR2          |
| YNL248C                                          | RPA49         | YDR183W                 | PLP1          |
| YJL095W                                          | BCK1          | YDR207C                 | UME6          |
| YKL048C                                          | ELM1          | YLR398C                 | SKI2          |
| YBR173C                                          | UMP1          | YDR207C                 | UME6          |
| YHR134W                                          | WSS1          | YOL090W                 | MSH2          |
| YCL001W                                          | RER1          | YKR030W                 | GMH1          |
| YKL116C                                          | PRR1          | YDL184C                 | RPL41A        |
| YER144C                                          | UBP5          | YLR398C                 | SKI2          |
| YJL154C                                          | VPS35         | YGL054C                 | ERV14         |

| Predictions at threshold level 0.80 continued... |               |                         |               |
|--------------------------------------------------|---------------|-------------------------|---------------|
| Gene1 of predicted pair                          |               | Gene2 of predicted pair |               |
| Systematic Name                                  | Standard Name | Systematic Name         | Standard Name |
| YOL111C                                          | MDY2          | YOL081W                 | IRA2          |
| YKL139W                                          | CTK1          | YNL253W                 | TEX1          |
| YEL009C                                          | GCN4          | YDR176W                 | NGG1          |
| YEL053C                                          | MAK10         | YMR311C                 | GLC8          |
| YGR104C                                          | SRB5          | YGR252W                 | GCN5          |
| YDL155W                                          | CLB3          | YKL041W                 | VPS24         |
| YBL103C                                          | RTG3          | YDL077C                 | VAM6          |
| YNL021W                                          | HDA1          | YPR119W                 | CLB2          |
| YMR026C                                          | PEX12         | YDR137W                 | RGP1          |
| YDR137W                                          | RGP1          | YNL238W                 | KEX2          |
| YPL037C                                          | EGD1          | YPL120W                 | VPS30         |
| YDR080W                                          | VPS41         | YAL002W                 | VPS8          |
| YMR284W                                          | YKU70         | YLR410W                 | VIP1          |
| YCR081W                                          | SRB8          | YJL095W                 | BCK1          |
| YGL174W                                          | BUD13         | YCR077C                 | PAT1          |
| YPL180W                                          | TCO89         | YJL183W                 | MNN11         |
| YBR171W                                          | SEC66         | YKR014C                 | YPT52         |
| YGL223C                                          | COG1          | YML071C                 | COG8          |
| YLR441C                                          | RPS1A         | YLR320W                 | MMS22         |
| YJR005W                                          | APL1          | YDR200C                 | VPS64         |
| YLR447C                                          | VMA6          | YPL018W                 | CTF19         |
| YOR035C                                          | SHE4          | YMR230W                 | RPS10B        |
| YHL031C                                          | GOS1          | YJR040W                 | GEF1          |
| YDR245W                                          | MNN10         | YOR375C                 | GDH1          |
| YHR156C                                          | LIN1          | YHR039C-A               | VMA10         |
| YHL031C                                          | GOS1          | YDR310C                 | SUM1          |
| YFL023W                                          | BUD27         | YML071C                 | COG8          |
| YNL054W                                          | VAC7          | YBR107C                 | IML3          |
| YJR056C                                          | YJR056C       | YML071C                 | COG8          |

| Predictions at threshold level 0.80 continued... |               |                         |               |
|--------------------------------------------------|---------------|-------------------------|---------------|
| Gene1 of predicted pair                          |               | Gene2 of predicted pair |               |
| Systematic Name                                  | Standard Name | Systematic Name         | Standard Name |
| YEL065W                                          | SIT1          | YDR137W                 | RGP1          |
| YHR114W                                          | BZZ1          | YAR014C                 | BUD14         |
| YLR435W                                          | TSR2          | YMR167W                 | MLH1          |
| YGL115W                                          | SNF4          | YLR398C                 | SKI2          |
| YKR099W                                          | BAS1          | YBR019C                 | GAL10         |
| YDR378C                                          | LSM6          | YGL252C                 | RTG2          |
| YKL160W                                          | ELF1          | YAL002W                 | VPS8          |
| YMR224C                                          | MRE11         | YLR315W                 | NKP2          |
| YCR077C                                          | PAT1          | YKL041W                 | VPS24         |
| YDL116W                                          | NUP84         | YIL036W                 | CST6          |
| YBR200W                                          | BEM1          | YPR120C                 | CLB5          |
| YDR202C                                          | RAV2          | YGL212W                 | VAM7          |
| YLR119W                                          | SRN2          | YOR337W                 | TEA1          |
| YKR020W                                          | VPS51         | YKL041W                 | VPS24         |
| YER139C                                          | YER139C       | YMR311C                 | GLC8          |
| YKL032C                                          | IXR1          | YHR115C                 | DMA1          |
| YGR252W                                          | GCN5          | YBL002W                 | HTB2          |
| YOR043W                                          | WHI2          | YDR358W                 | GGA1          |
| YNL069C                                          | RPL16B        | YCR066W                 | RAD18         |
| YDL020C                                          | RPN4          | YLR386W                 | VAC14         |
| YMR224C                                          | MRE11         | YKR072C                 | SIS2          |
| YBR171W                                          | SEC66         | YBR107C                 | IML3          |
| YML016C                                          | PPZ1          | YOR275C                 | RIM20         |
| YKL126W                                          | YPK1          | YOR066W                 | MSA1          |
| YKR072C                                          | SIS2          | YGL163C                 | RAD54         |
| YPR007C                                          | REC8          | YPR119W                 | CLB2          |
| YER162C                                          | RAD4          | YBR036C                 | CSG2          |
| YGL135W                                          | RPL1B         | YLR018C                 | POM34         |
| YML016C                                          | PPZ1          | YMR055C                 | BUB2          |

| Predictions at threshold level 0.80 continued... |               |                         |               |
|--------------------------------------------------|---------------|-------------------------|---------------|
| Gene1 of predicted pair                          |               | Gene2 of predicted pair |               |
| Systematic Name                                  | Standard Name | Systematic Name         | Standard Name |
| YML088W                                          | UFO1          | YJL204C                 | RCY1          |
| YJL004C                                          | SYS1          | YNR032W                 | PPG1          |
| YAL024C                                          | LTE1          | YGL151W                 | NUT1          |
| YJL124C                                          | LSM1          | YKL213C                 | DOA1          |
| YMR116C                                          | ASC1          | YGL200C                 | EMP24         |
| YML071C                                          | COG8          | YDL192W                 | ARF1          |
| YER116C                                          | SLX8          | YML013W                 | UBX2          |
| YOR106W                                          | VAM3          | YER120W                 | SCS2          |
| YGL115W                                          | SNF4          | YHR039C-A               | VMA10         |
| YMR142C                                          | RPL13B        | YJL183W                 | MNN11         |
| YPL256C                                          | CLN2          | YOL081W                 | IRA2          |
| YMR142C                                          | RPL13B        | YNL076W                 | MKS1          |
| YKL116C                                          | PRR1          | YJL095W                 | BCK1          |
| YMR202W                                          | ERG2          | YER044C                 | ERG28         |
| YMR116C                                          | ASC1          | YMR038C                 | CCS1          |
| YGL178W                                          | MPT5          | YDR485C                 | VPS72         |
| YLR094C                                          | GIS3          | YDL149W                 | ATG9          |
| YHR161C                                          | YAP1801       | YLR396C                 | VPS33         |
| YIL034C                                          | CAP2          | YKL204W                 | EAP1          |
| YHL020C                                          | OPI1          | YER162C                 | RAD4          |
| YDR174W                                          | HMO1          | YDR289C                 | RTT103        |
| YLR018C                                          | POM34         | YMR273C                 | ZDS1          |
| YDR484W                                          | VPS52         | YJL204C                 | RCY1          |
| YMR198W                                          | CIK1          | YJR035W                 | RAD26         |
| YDR080W                                          | VPS41         | YPL037C                 | EGD1          |
| YPL024W                                          | RMI1          | YDR261C                 | EXG2          |
| YBL058W                                          | SHP1          | YOL121C                 | RPS19A        |
| YGR078C                                          | PAC10         | YHR056C                 | RSC30         |
| YPR036W                                          | VMA13         | YMR214W                 | SCJ1          |

| Predictions at threshold level 0.80 continued... |               |                         |               |
|--------------------------------------------------|---------------|-------------------------|---------------|
| Gene1 of predicted pair                          |               | Gene2 of predicted pair |               |
| Systematic Name                                  | Standard Name | Systematic Name         | Standard Name |
| YMR153W                                          | NUP53         | YBR108W                 | YBR108W       |
| YJR040W                                          | GEF1          | YER122C                 | GLO3          |
| YNL087W                                          | TCB2          | YOL111C                 | MDY2          |
| YPR017C                                          | DSS4          | YGR072W                 | UPF3          |
| YBR126C                                          | TPS1          | YBR030W                 | YBR030W       |
| YDL155W                                          | CLB3          | YDR440W                 | DOT1          |
| YBR107C                                          | IML3          | YDR171W                 | HSP42         |
| YLR337C                                          | VRP1          | YOR127W                 | RGA1          |
| YMR016C                                          | SOK2          | YJR084W                 | CSN12         |
| YJL154C                                          | VPS35         | YGL253W                 | HXK2          |
| YPR046W                                          | MCM16         | YJL183W                 | MNN11         |
| YCR020C-A                                        | MAK31         | YAL002W                 | VPS8          |
| YPL253C                                          | VIK1          | YLR254C                 | NDL1          |
| YNL288W                                          | CAF40         | YPL042C                 | SSN3          |
| YDR382W                                          | RPP2B         | YPL220W                 | RPL1A         |
| YJR135C                                          | MCM22         | YAR014C                 | BUD14         |
| YOR001W                                          | RRP6          | YDR137W                 | RGP1          |
| YDR129C                                          | SAC6          | YAL002W                 | VPS8          |
| YDL116W                                          | NUP84         | YCR024C-A               | PMP1          |
| YMR142C                                          | RPL13B        | YER040W                 | GLN3          |
| YJL176C                                          | SWI3          | YJR084W                 | CSN12         |
| YJL060W                                          | BNA3          | YDL226C                 | GCS1          |
| YMR055C                                          | BUB2          | YFR036W                 | CDC26         |
| YER120W                                          | SCS2          | YLR309C                 | IMH1          |
| YBR260C                                          | RGD1          | YNL090W                 | RHO2          |
| YBR215W                                          | HPC2          | YCL037C                 | SRO9          |
| YJL029C                                          | VPS53         | YDL226C                 | GCS1          |
| YGR020C                                          | VMA7          | YDR310C                 | SUM1          |
| YBL102W                                          | SFT2          | YHR039C-A               | VMA10         |

| Predictions at threshold level 0.80 continued... |               |                         |               |
|--------------------------------------------------|---------------|-------------------------|---------------|
| Gene1 of predicted pair                          |               | Gene2 of predicted pair |               |
| Systematic Name                                  | Standard Name | Systematic Name         | Standard Name |
| YBL078C                                          | ATG8          | YNL223W                 | ATG4          |
| YNL288W                                          | CAF40         | YAL002W                 | VPS8          |
| YEL050C                                          | RML2          | YPL106C                 | SSE1          |
| YDR245W                                          | MNN10         | YFL048C                 | EMP47         |
| YJL154C                                          | VPS35         | YPL253C                 | VIK1          |
| YDR293C                                          | SSD1          | YNL166C                 | BNI5          |
| YNL238W                                          | KEX2          | YGL003C                 | CDH1          |
| YIL159W                                          | BNR1          | YDR310C                 | SUM1          |
| YOL145C                                          | CTR9          | YDR440W                 | DOT1          |
| YJL172W                                          | CPS1          | YER162C                 | RAD4          |
| YDR004W                                          | RAD57         | YMR198W                 | CIK1          |
| YJL154C                                          | VPS35         | YNL297C                 | MON2          |
| YNL031C                                          | HHT2          | YDR227W                 | SIR4          |
| YOR195W                                          | SLK19         | YNL307C                 | MCK1          |
| YPR030W                                          | CSR2          | YER139C                 | YER139C       |
| YKL139W                                          | CTK1          | YJR140C                 | HIR3          |
| YBR171W                                          | SEC66         | YML071C                 | COG8          |
| YPR052C                                          | NHP6A         | YBR215W                 | HPC2          |
| YPL057C                                          | SUR1          | YLR371W                 | ROM2          |
| YER162C                                          | RAD4          | YMR152W                 | YIM1          |
| YLR385C                                          | SWC7          | YLR399C                 | BDF1          |
| YNL215W                                          | IES2          | YBR036C                 | CSG2          |
| YHR060W                                          | VMA22         | YKL041W                 | VPS24         |
| YOR076C                                          | SKI7          | YPR189W                 | SKI3          |
| YIR005W                                          | IST3          | YNL116W                 | DMA2          |
| YKL048C                                          | ELM1          | YGL115W                 | SNF4          |
| YBR107C                                          | IML3          | YEL053C                 | MAK10         |
| YDL160C                                          | DHH1          | YJR090C                 | GRR1          |
| YKR061W                                          | KTR2          | YDR335W                 | MSN5          |

| Predictions at threshold level 0.80 continued... |               |                         |               |
|--------------------------------------------------|---------------|-------------------------|---------------|
| Gene1 of predicted pair                          |               | Gene2 of predicted pair |               |
| Systematic Name                                  | Standard Name | Systematic Name         | Standard Name |
| YJL172W                                          | CPS1          | YLR180W                 | SAM1          |
| YBR019C                                          | GAL10         | YLR370C                 | ARC18         |
| YNL079C                                          | TPM1          | YLR371W                 | ROM2          |
| YBR200W                                          | BEM1          | YCR086W                 | CSM1          |
| YEL065W                                          | SIT1          | YOL081W                 | IRA2          |
| YDR484W                                          | VPS52         | YKL048C                 | ELM1          |
| YCR020C-A                                        | MAK31         | YDL006W                 | PTC1          |
| YGL133W                                          | ITC1          | YGR135W                 | PRE9          |
| YOR375C                                          | GDH1          | YDR440W                 | DOT1          |
| YKL160W                                          | ELF1          | YLR182W                 | SWI6          |
| YLR337C                                          | VRP1          | YOL067C                 | RTG1          |
| YPR051W                                          | MAK3          | YHL002W                 | HSE1          |
| YDR289C                                          | RTT103        | YLR350W                 | ORM2          |
| YCR092C                                          | MSH3          | YOL090W                 | MSH2          |
| YKL006W                                          | RPL14A        | YGR135W                 | PRE9          |
| YGL212W                                          | VAM7          | YKR048C                 | NAP1          |
| YKL139W                                          | CTK1          | YOR270C                 | VPH1          |
| YJR060W                                          | CBF1          | YLR309C                 | IMH1          |
| YMR055C                                          | BUB2          | YDR260C                 | SWM1          |
| YOR275C                                          | RIM20         | YBL087C                 | RPL23A        |
| YBR126C                                          | TPS1          | YMR224C                 | MRE11         |
| YGL003C                                          | CDH1          | YDL047W                 | SIT4          |
| YPL105C                                          | YPL105C       | YPL120W                 | VPS30         |
| YLR234W                                          | TOP3          | YBR057C                 | MUM2          |
| YNL243W                                          | SLA2          | YLR337C                 | VRP1          |
| YML115C                                          | VAN1          | YOR275C                 | RIM20         |
| YDR363W-A                                        | SEM1          | YLR421C                 | RPN13         |
| YDR358W                                          | GGA1          | YMR311C                 | GLC8          |
| YDR507C                                          | GIN4          | YHR061C                 | GIC1          |



| Predictions at threshold level 0.80 continued... |               |                         |               |
|--------------------------------------------------|---------------|-------------------------|---------------|
| Gene1 of predicted pair                          |               | Gene2 of predicted pair |               |
| Systematic Name                                  | Standard Name | Systematic Name         | Standard Name |
| YKL025C                                          | PAN3          | YGL253W                 | HXK2          |
| YPR018W                                          | RLF2          | YDL059C                 | RAD59         |
| YOR290C                                          | SNF2          | YKL160W                 | ELF1          |
| YMR273C                                          | ZDS1          | YKR024C                 | DBP7          |
| YMR004W                                          | MVP1          | YNL107W                 | YAF9          |
| YDR477W                                          | SNF1          | YOL081W                 | IRA2          |
| YMR080C                                          | NAM7          | YHR134W                 | WSS1          |
| YLR452C                                          | SST2          | YJR084W                 | CSN12         |
| YML013W                                          | UBX2          | YMR055C                 | BUB2          |
| YOR358W                                          | HAP5          | YBL079W                 | NUP170        |
| YNL199C                                          | GCR2          | YNL107W                 | YAF9          |
| YPL161C                                          | BEM4          | YHR061C                 | GIC1          |
| YKL139W                                          | CTK1          | YDR254W                 | CHL4          |
| YOL111C                                          | MDY2          | YER040W                 | GLN3          |
| YDR320C                                          | SWA2          | YDR310C                 | SUM1          |
| YPL022W                                          | RAD1          | YNL016W                 | PUB1          |
| YJL176C                                          | SWI3          | YGL153W                 | PEX14         |
| YBR171W                                          | SEC66         | YHR111W                 | UBA4          |
| YDR320C                                          | SWA2          | YMR004W                 | MVP1          |
| YFR010W                                          | UBP6          | YPL195W                 | APL5          |
| YML001W                                          | YPT7          | YLR093C                 | NYV1          |
| YKL116C                                          | PRR1          | YPR030W                 | CSR2          |
| YGL078C                                          | DBP3          | YMR153W                 | NUP53         |
| YKR099W                                          | BAS1          | YHR039C-A               | VMA10         |
| YKR001C                                          | VPS1          | YOR312C                 | RPL20B        |
| YHR060W                                          | VMA22         | YPR046W                 | MCM16         |
| YKL006W                                          | RPL14A        | YPL161C                 | BEM4          |
| YOR127W                                          | RGA1          | YHR060W                 | VMA22         |
| YGL174W                                          | BUD13         | YOR043W                 | WHI2          |

| Predictions at threshold level 0.80 continued... |               |                         |               |
|--------------------------------------------------|---------------|-------------------------|---------------|
| Gene1 of predicted pair                          |               | Gene2 of predicted pair |               |
| Systematic Name                                  | Standard Name | Systematic Name         | Standard Name |
| YPL259C                                          | APM1          | YOR327C                 | SNC2          |
| YHR098C                                          | SFB3          | YPR135W                 | CTF4          |
| YNL058C                                          | YNL058C       | YHR081W                 | LRP1          |
| YGL038C                                          | OCH1          | YMR052W                 | FAR3          |
| YDL020C                                          | RPN4          | YHR039C-A               | VMA10         |
| YPL240C                                          | HSP82         | YDL246C                 | SOR2          |
| YMR202W                                          | ERG2          | YJL187C                 | SWE1          |
| YIL034C                                          | CAP2          | YPR046W                 | MCM16         |
| YGL078C                                          | DBP3          | YMR016C                 | SOK2          |
| YMR038C                                          | CCS1          | YER122C                 | GLO3          |
| YKL139W                                          | CTK1          | YMR038C                 | CCS1          |
| YNL199C                                          | GCR2          | YDR289C                 | RTT103        |
| YLR429W                                          | CRN1          | YOR141C                 | ARP8          |
| YEL044W                                          | IES6          | YOR035C                 | SHE4          |
| YKR099W                                          | BAS1          | YMR152W                 | YIM1          |
| YHL031C                                          | GOS1          | YGL212W                 | VAM7          |
| YOR106W                                          | VAM3          | YKR020W                 | VPS51         |
| YLR083C                                          | EMP70         | YNL107W                 | YAF9          |
| YOR023C                                          | AHC1          | YHR111W                 | UBA4          |
| YLR360W                                          | VPS38         | YCR086W                 | CSM1          |
| YJR060W                                          | CBF1          | YEL051W                 | VMA8          |
| YPL119C                                          | DBP1          | YPR119W                 | CLB2          |
| YLR423C                                          | ATG17         | YNL090W                 | RHO2          |
| YIL133C                                          | RPL16A        | YGL252C                 | RTG2          |
| YMR198W                                          | CIK1          | YPL018W                 | CTF19         |
| YGR252W                                          | GCN5          | YGL252C                 | RTG2          |
| YHR200W                                          | RPN10         | YML097C                 | VPS9          |
| YPL024W                                          | RMI1          | YDL192W                 | ARF1          |
| YMR142C                                          | RPL13B        | YPL137C                 | GIP3          |

| Predictions at threshold level 0.80 continued... |               |                         |               |
|--------------------------------------------------|---------------|-------------------------|---------------|
| Gene1 of predicted pair                          |               | Gene2 of predicted pair |               |
| Systematic Name                                  | Standard Name | Systematic Name         | Standard Name |
| YGL174W                                          | BUD13         | YDL002C                 | NHP10         |
| YIL034C                                          | CAP2          | YOL067C                 | RTG1          |
| YOR109W                                          | INP53         | YPL105C                 | YPL105C       |
| YDR507C                                          | GIN4          | YJL187C                 | SWE1          |
| YML016C                                          | PPZ1          | YLR425W                 | TUS1          |
| YOL145C                                          | CTR9          | YJL140W                 | RPB4          |
| YJL154C                                          | VPS35         | YDR080W                 | VPS41         |
| YBR200W                                          | BEM1          | YKL080W                 | VMA5          |
| YDR103W                                          | STE5          | YOR212W                 | STE4          |
| YDR363W-A                                        | SEM1          | YGL163C                 | RAD54         |
| YPL037C                                          | EGD1          | YNL041C                 | COG6          |
| YPL024W                                          | RMI1          | YFL023W                 | BUD27         |
| YMR152W                                          | YIM1          | YJR084W                 | CSN12         |
| YLR094C                                          | GIS3          | YPL195W                 | APL5          |
| YIL008W                                          | URM1          | YGL253W                 | HXK2          |
| YJR043C                                          | POL32         | YGL100W                 | SEH1          |
| YDR137W                                          | RGP1          | YGL025C                 | PGD1          |
| YLR386W                                          | VAC14         | YBL087C                 | RPL23A        |
| YMR055C                                          | BUB2          | YGR054W                 | YGR054W       |
| YJL117W                                          | PHO86         | YLR371W                 | ROM2          |
| YLR083C                                          | EMP70         | YGR261C                 | APL6          |
| YBR200W                                          | BEM1          | YDL047W                 | SIT4          |
| YDR192C                                          | NUP42         | YGR081C                 | SLX9          |
| YIL034C                                          | CAP2          | YOR132W                 | VPS17         |
| YFR032C-A                                        | RPL29         | YKL048C                 | ELM1          |
| YLR371W                                          | ROM2          | YLR093C                 | NYV1          |
| YBR084C-A                                        | RPL19A        | YHR152W                 | SPO12         |
| YBR030W                                          | YBR030W       | YLR398C                 | SKI2          |
| YGR249W                                          | MGA1          | YGL003C                 | CDH1          |

| Predictions at threshold level 0.80 continued... |               |                         |               |
|--------------------------------------------------|---------------|-------------------------|---------------|
| Gene1 of predicted pair                          |               | Gene2 of predicted pair |               |
| Systematic Name                                  | Standard Name | Systematic Name         | Standard Name |
| YGL066W                                          | SGF73         | YGR135W                 | PRE9          |
| YER107C                                          | GLE2          | YML041C                 | VPS71         |
| YLR119W                                          | SRN2          | YLR371W                 | ROM2          |
| YMR224C                                          | MRE11         | YLR032W                 | RAD5          |
| YJL124C                                          | LSM1          | YFR036W                 | CDC26         |
| YNR072W                                          | HXT17         | YFR036W                 | CDC26         |
| YNL068C                                          | FKH2          | YKR057W                 | RPS21A        |
| YPR141C                                          | KAR3          | YGL190C                 | CDC55         |
| YCR081W                                          | SRB8          | YLR425W                 | TUS1          |
| YLR360W                                          | VPS38         | YJL029C                 | VPS53         |
| YGR217W                                          | CCH1          | YMR205C                 | PFK2          |
| YHR156C                                          | LIN1          | YNL058C                 | YNL058C       |
| YLR234W                                          | TOP3          | YHR013C                 | ARD1          |
| YLR410W                                          | VIP1          | YHR108W                 | GGA2          |
| YLR240W                                          | VPS34         | YJL029C                 | VPS53         |
| YBR171W                                          | SEC66         | YDL056W                 | MBP1          |
| YAL024C                                          | LTE1          | YHL022C                 | SPO11         |
| YDR335W                                          | MSN5          | YIL103W                 | DPH1          |
| YNL069C                                          | RPL16B        | YER162C                 | RAD4          |
| YBL058W                                          | SHP1          | YNL058C                 | YNL058C       |
| YNL325C                                          | FIG4          | YOR327C                 | SNC2          |
| YDR383C                                          | NKP1          | YLR381W                 | CTF3          |
| YLR079W                                          | SIC1          | YDR378C                 | LSM6          |
| YHR060W                                          | VMA22         | YGL115W                 | SNF4          |
| YPL042C                                          | SSN3          | YBR215W                 | HPC2          |
| YER116C                                          | SLX8          | YEL060C                 | PRB1          |
| YJL187C                                          | SWE1          | YML028W                 | TSA1          |
| YNL307C                                          | MCK1          | YGL124C                 | MON1          |
| YDR261C                                          | EXG2          | YBR280C                 | SAF1          |

| Predictions at threshold level 0.80 continued... |               |                         |               |
|--------------------------------------------------|---------------|-------------------------|---------------|
| Gene1 of predicted pair                          |               | Gene2 of predicted pair |               |
| Systematic Name                                  | Standard Name | Systematic Name         | Standard Name |
| YPL152W                                          | RRD2          | YDR318W                 | MCM21         |
| YGR217W                                          | CCH1          | YPL089C                 | RLM1          |
| YBR107C                                          | IML3          | YDR155C                 | CPR1          |
| YLR386W                                          | VAC14         | YHR013C                 | ARD1          |
| YLR090W                                          | XDJ1          | YMR214W                 | SCJ1          |
| YER110C                                          | KAP123        | YGR059W                 | SPR3          |
| YMR025W                                          | CSI1          | YJR084W                 | CSN12         |
| YLR313C                                          | SPH1          | YLR410W                 | VIP1          |
| YKR001C                                          | VPS1          | YER162C                 | RAD4          |
| YDR477W                                          | SNF1          | YPR046W                 | MCM16         |
| YLR337C                                          | VRP1          | YDR183W                 | PLP1          |
| YDR245W                                          | MNN10         | YCR077C                 | PAT1          |
| YPL213W                                          | LEA1          | YCR077C                 | PAT1          |
| YHL031C                                          | GOS1          | YMR004W                 | MVP1          |
| YNR072W                                          | HXT17         | YNL238W                 | KEX2          |
| YDR477W                                          | SNF1          | YMR153W                 | NUP53         |
| YHR012W                                          | VPS29         | YAR014C                 | BUD14         |
| YIL076W                                          | SEC28         | YMR004W                 | MVP1          |
| YBL071W-A                                        | KTI11         | YPL101W                 | ELP4          |
| YGR270W                                          | YTA7          | YGL252C                 | RTG2          |
| YMR055C                                          | BUB2          | YHR013C                 | ARD1          |
| YGR135W                                          | PRE9          | YPL256C                 | CLN2          |
| YMR026C                                          | PEX12         | YIL076W                 | SEC28         |
| YOL051W                                          | GAL11         | YLR357W                 | RSC2          |
| YGR019W                                          | UGA1          | YBL051C                 | PIN4          |
| YLR410W                                          | VIP1          | YAR014C                 | BUD14         |
| YLR399C                                          | BDF1          | YFR034C                 | PHO4          |
| YBL047C                                          | EDE1          | YKL048C                 | ELM1          |
| YML115C                                          | VAN1          | YMR199W                 | CLN1          |

| Predictions at threshold level 0.80 continued... |               |                         |               |
|--------------------------------------------------|---------------|-------------------------|---------------|
| Gene1 of predicted pair                          |               | Gene2 of predicted pair |               |
| Systematic Name                                  | Standard Name | Systematic Name         | Standard Name |
| YIR003W                                          | YIR003W       | YPL050C                 | MNN9          |
| YHR081W                                          | LRP1          | YER040W                 | GLN3          |
| YDL226C                                          | GCS1          | YOR036W                 | PEP12         |
| YFR031C-A                                        | RPL2A         | YNL107W                 | YAF9          |
| YKL068W                                          | NUP100        | YJR090C                 | GRR1          |
| YJR090C                                          | GRR1          | YNL107W                 | YAF9          |
| YDR254W                                          | CHL4          | YJR035W                 | RAD26         |
| YOR039W                                          | CKB2          | YJL187C                 | SWE1          |
| YPR029C                                          | APL4          | YKR001C                 | VPS1          |
| YER116C                                          | SLX8          | YOR066W                 | MSA1          |
| YBR107C                                          | IML3          | YDR310C                 | SUM1          |
| YPR036W                                          | VMA13         | YNL076W                 | MKS1          |
| YIL053W                                          | RHR2          | YGR249W                 | MGA1          |
| YGL078C                                          | DBP3          | YDR207C                 | UME6          |
| YMR116C                                          | ASC1          | YKL139W                 | CTK1          |
| YDR156W                                          | RPA14         | YHR200W                 | RPN10         |
| YDR137W                                          | RGP1          | YOL018C                 | TLG2          |
| YOR106W                                          | VAM3          | YML071C                 | COG8          |
| YMR109W                                          | MYO5          | YDR289C                 | RTT103        |
| YAL024C                                          | LTE1          | YDL083C                 | RPS16B        |
| YNL032W                                          | SIW14         | YOR270C                 | VPH1          |
| YBR194W                                          | SOY1          | YER122C                 | GLO3          |
| YOR230W                                          | WTM1          | YOR229W                 | WTM2          |
| YPR046W                                          | MCM16         | YNL076W                 | MKS1          |
| YBL102W                                          | SFT2          | YMR004W                 | MVP1          |
| YGR173W                                          | RBG2          | YDR152W                 | GIR2          |
| YLR381W                                          | CTF3          | YGR054W                 | YGR054W       |
| YNL238W                                          | KEX2          | YMR311C                 | GLC8          |
| YNL069C                                          | RPL16B        | YCL001W                 | RER1          |

| Predictions at threshold level 0.80 continued... |               |                         |               |
|--------------------------------------------------|---------------|-------------------------|---------------|
| Gene1 of predicted pair                          |               | Gene2 of predicted pair |               |
| Systematic Name                                  | Standard Name | Systematic Name         | Standard Name |
| YDR245W                                          | MNN10         | YOR124C                 | UBP2          |
| YLR288C                                          | MEC3          | YHR010W                 | RPL27A        |
| YHR200W                                          | RPN10         | YEL060C                 | PRB1          |
| YJL172W                                          | CPS1          | YCR053W                 | THR4          |
| YML115C                                          | VAN1          | YMR153W                 | NUP53         |
| YLL007C                                          | YLL007C       | YGL253W                 | HXK2          |
| YPL022W                                          | RAD1          | YPL256C                 | CLN2          |
| YCL001W                                          | RER1          | YPL234C                 | TFP3          |
| YIL053W                                          | RHR2          | YBR126C                 | TPS1          |
| YML117W                                          | NAB6          | YGR135W                 | PRE9          |
| YKR099W                                          | BAS1          | YLR094C                 | GIS3          |
| YNL079C                                          | TPM1          | YDR440W                 | DOT1          |
| YJL172W                                          | CPS1          | YFL023W                 | BUD27         |
| YDR137W                                          | RGP1          | YLR371W                 | ROM2          |
| YGL212W                                          | VAM7          | YDR207C                 | UME6          |
| YBR290W                                          | BSD2          | YCR086W                 | CSM1          |
| YOR109W                                          | INP53         | YNL238W                 | KEX2          |
| YLL039C                                          | UBI4          | YBL072C                 | RPS8A         |
| YBL058W                                          | SHP1          | YLR386W                 | VAC14         |
| YBR274W                                          | CHK1          | YKL114C                 | APN1          |
| YJR035W                                          | RAD26         | YKL054C                 | DEF1          |
| YPL213W                                          | LEA1          | YLR425W                 | TUS1          |
| YNL041C                                          | COG6          | YDR358W                 | GGA1          |
| YMR026C                                          | PEX12         | YGL124C                 | MON1          |
| YEL050C                                          | RML2          | YJR135C                 | MCM22         |
| YKL139W                                          | CTK1          | YDL077C                 | VAM6          |
| YPR120C                                          | CLB5          | YCR077C                 | PAT1          |
| YKL139W                                          | CTK1          | YGL252C                 | RTG2          |
| YLR090W                                          | XDJ1          | YER040W                 | GLN3          |

| Predictions at threshold level 0.80 continued... |               |                         |               |
|--------------------------------------------------|---------------|-------------------------|---------------|
| Gene1 of predicted pair                          |               | Gene2 of predicted pair |               |
| Systematic Name                                  | Standard Name | Systematic Name         | Standard Name |
| YEL053C                                          | MAK10         | YBR019C                 | GAL10         |
| YGR072W                                          | UPF3          | YDL006W                 | PTC1          |
| YER116C                                          | SLX8          | YEL053C                 | MAK10         |
| YBL103C                                          | RTG3          | YDL192W                 | ARF1          |
| YBL008W                                          | HIR1          | YLR350W                 | ORM2          |
| YEL013W                                          | VAC8          | YPR185W                 | ATG13         |
| YLR320W                                          | MMS22         | YDL006W                 | PTC1          |
| YLR386W                                          | VAC14         | YPL253C                 | VIK1          |
| YNL058C                                          | YNL058C       | YDL077C                 | VAM6          |
| YDR477W                                          | SNF1          | YBL103C                 | RTG3          |
| YHR039C-A                                        | VMA10         | YOR066W                 | MSA1          |
| YHR167W                                          | THP2          | YLR350W                 | ORM2          |
| YNL215W                                          | IES2          | YFR030W                 | MET10         |
| YOL044W                                          | PEX15         | YNL214W                 | PEX17         |
| YBR200W                                          | BEM1          | YML112W                 | CTK3          |
| YGL163C                                          | RAD54         | YIR005W                 | IST3          |
| YFR010W                                          | UBP6          | YKL139W                 | CTK1          |
| YDR477W                                          | SNF1          | YMR152W                 | YIM1          |
| YBR108W                                          | YBR108W       | YBL103C                 | RTG3          |
| YPR036W                                          | VMA13         | YER005W                 | YND1          |
| YDR293C                                          | SSD1          | YEL056W                 | HAT2          |
| YGR270W                                          | YTA7          | YOL054W                 | PSH1          |
| YCR066W                                          | RAD18         | YHL020C                 | OPI1          |
| YMR109W                                          | MYO5          | YDR155C                 | CPR1          |
| YPL057C                                          | SUR1          | YNL076W                 | MKS1          |
| YOR080W                                          | DIA2          | YPR119W                 | CLB2          |
| YMR142C                                          | RPL13B        | YOR270C                 | VPH1          |
| YBR215W                                          | HPC2          | YOL081W                 | IRA2          |
| YBL021C                                          | HAP3          | YDR310C                 | SUM1          |



| Predictions at threshold level 0.80 continued... |               |                         |               |
|--------------------------------------------------|---------------|-------------------------|---------------|
| Gene1 of predicted pair                          |               | Gene2 of predicted pair |               |
| Systematic Name                                  | Standard Name | Systematic Name         | Standard Name |
| YMR199W                                          | CLN1          | YDR379W                 | RGA2          |
| YGR081C                                          | SLX9          | YBR215W                 | HPC2          |
| YBR030W                                          | YBR030W       | YNL238W                 | KEX2          |
| YGL025C                                          | PGD1          | YML001W                 | YPT7          |
| YML016C                                          | PPZ1          | YGL003C                 | CDH1          |
| YLR447C                                          | VMA6          | YAL002W                 | VPS8          |
| YOR106W                                          | VAM3          | YDR469W                 | SDC1          |
| YBR215W                                          | HPC2          | YDR171W                 | HSP42         |
| YAL024C                                          | LTE1          | YMR198W                 | CIK1          |
| YJL004C                                          | SYS1          | YJR033C                 | RAV1          |
| YCR088W                                          | ABP1          | YKL213C                 | DOA1          |
| YDR484W                                          | VPS52         | YJL029C                 | VPS53         |
| YNL206C                                          | RTT106        | YBR107C                 | IML3          |
| YOR096W                                          | RPS7A         | YLR441C                 | RPS1A         |
| YPL050C                                          | MNN9          | YPL112C                 | PEX25         |
| YLL007C                                          | YLL007C       | YHR111W                 | UBA4          |
| YNL025C                                          | SSN8          | YKL139W                 | CTK1          |
| YKR101W                                          | SIR1          | YBR010W                 | HHT1          |
| YDR129C                                          | SAC6          | YJR084W                 | CSN12         |
| YNL069C                                          | RPL16B        | YLR309C                 | IMH1          |
| YML016C                                          | PPZ1          | YDR183W                 | PLP1          |
| YFL047W                                          | RGD2          | YGL016W                 | KAP122        |
| YFR036W                                          | CDC26         | YOR368W                 | RAD17         |
| YHR013C                                          | ARD1          | YDR289C                 | RTT103        |
| YNL058C                                          | YNL058C       | YPR046W                 | MCM16         |
| YBR057C                                          | MUM2          | YGR135W                 | PRE9          |
| YPL037C                                          | EGD1          | YHR012W                 | VPS29         |
| YHR134W                                          | WSS1          | YOR023C                 | AHC1          |
| YLR083C                                          | EMP70         | YHR060W                 | VMA22         |

| Predictions at threshold level 0.80 continued... |               |                         |               |
|--------------------------------------------------|---------------|-------------------------|---------------|
| Gene1 of predicted pair                          |               | Gene2 of predicted pair |               |
| Systematic Name                                  | Standard Name | Systematic Name         | Standard Name |
| YDR363W-A                                        | SEM1          | YPL161C                 | BEM4          |
| YNL297C                                          | MON2          | YHL020C                 | OPI1          |
| YDR156W                                          | RPA14         | YPL018W                 | CTF19         |
| YML038C                                          | YMD8          | YER120W                 | SCS2          |
| YLR109W                                          | AHP1          | YOL151W                 | GRE2          |
| YGR270W                                          | YTA7          | YDR310C                 | SUM1          |
| YLR447C                                          | VMA6          | YOL067C                 | RTG1          |
| YGL237C                                          | HAP2          | YNL107W                 | YAF9          |
| YKR099W                                          | BAS1          | YMR214W                 | SCJ1          |
| YOR083W                                          | WHI5          | YBR194W                 | SOY1          |
| YGR261C                                          | APL6          | YDL006W                 | PTC1          |
| YEL051W                                          | VMA8          | YNL107W                 | YAF9          |
| YBR084C-A                                        | RPL19A        | YHR111W                 | UBA4          |
| YHR200W                                          | RPN10         | YDL047W                 | SIT4          |
| YER144C                                          | UBP5          | YDL077C                 | VAM6          |
| YGR159C                                          | NSR1          | YLR410W                 | VIP1          |
| YFR010W                                          | UBP6          | YDR484W                 | VPS52         |
| YCL037C                                          | SRO9          | YML038C                 | YMD8          |
| YML016C                                          | PPZ1          | YPR120C                 | CLB5          |
| YPL042C                                          | SSN3          | YKL160W                 | ELF1          |
| YGR108W                                          | CLB1          | YDR289C                 | RTT103        |
| YLR148W                                          | PEP3          | YMR231W                 | PEP5          |
| YNL041C                                          | COG6          | YER040W                 | GLN3          |
| YMR224C                                          | MRE11         | YLR182W                 | SWI6          |
| YNL127W                                          | FAR11         | YAL002W                 | VPS8          |
| YCR086W                                          | CSM1          | YDR183W                 | PLP1          |
| YJL053W                                          | PEP8          | YHR161C                 | YAP1801       |
| YNL032W                                          | SIW14         | YLR180W                 | SAM1          |
| YGR020C                                          | VMA7          | YER122C                 | GLO3          |

| Predictions at threshold level 0.80 continued... |               |                         |               |
|--------------------------------------------------|---------------|-------------------------|---------------|
| Gene1 of predicted pair                          |               | Gene2 of predicted pair |               |
| Systematic Name                                  | Standard Name | Systematic Name         | Standard Name |
| YPR030W                                          | CSR2          | YCR053W                 | THR4          |
| YNL106C                                          | INP52         | YHR111W                 | UBA4          |
| YLR447C                                          | VMA6          | YKL080W                 | VMA5          |
| YOR132W                                          | VPS17         | YNL127W                 | FAR11         |
| YOR337W                                          | TEA1          | YKL126W                 | YPK1          |
| YDR378C                                          | LSM6          | YOL091W                 | SPO21         |
| YHR111W                                          | UBA4          | YBL087C                 | RPL23A        |
| YMR224C                                          | MRE11         | YPL195W                 | APL5          |
| YGL078C                                          | DBP3          | YLR452C                 | SST2          |
| YNL076W                                          | MKS1          | YDR310C                 | SUM1          |
| YNL032W                                          | SIW14         | YNL041C                 | COG6          |
| YIR025W                                          | MND2          | YFR036W                 | CDC26         |
| YAL024C                                          | LTE1          | YBR278W                 | DPB3          |
| YHR156C                                          | LIN1          | YER116C                 | SLX8          |
| YDL006W                                          | PTC1          | YPL089C                 | RLM1          |
| YOR195W                                          | SLK19         | YOR127W                 | RGA1          |
| YGL006W                                          | PMC1          | YBL078C                 | ATG8          |
| YNL041C                                          | COG6          | YEL036C                 | ANP1          |
| YDR176W                                          | NGG1          | YCL010C                 | SGF29         |
| YIL159W                                          | BNR1          | YLR425W                 | TUS1          |
| YGL250W                                          | RMR1          | YKL101W                 | HSL1          |
| YKR095W                                          | MLP1          | YBL079W                 | NUP170        |
| YNL325C                                          | FIG4          | YKL126W                 | YPK1          |
| YNL058C                                          | YNL058C       | YNL238W                 | KEX2          |
| YER144C                                          | UBP5          | YPL161C                 | BEM4          |
| YDR310C                                          | SUM1          | YOR014W                 | RTS1          |
| YDR004W                                          | RAD57         | YKR072C                 | SIS2          |
| YDR484W                                          | VPS52         | YNL058C                 | YNL058C       |
| YMR199W                                          | CLN1          | YDR076W                 | RAD55         |

| Predictions at threshold level 0.80 continued... |               |                         |               |
|--------------------------------------------------|---------------|-------------------------|---------------|
| Gene1 of predicted pair                          |               | Gene2 of predicted pair |               |
| Systematic Name                                  | Standard Name | Systematic Name         | Standard Name |
| YGL178W                                          | MPT5          | YPL101W                 | ELP4          |
| YLR396C                                          | VPS33         | YAL002W                 | VPS8          |
| YDR484W                                          | VPS52         | YLR370C                 | ARC18         |
| YGL066W                                          | SGF73         | YPL248C                 | GAL4          |
| YNL117W                                          | MLS1          | YLR032W                 | RAD5          |
| YGR108W                                          | CLB1          | YBR200W                 | BEM1          |
| YER116C                                          | SLX8          | YLR370C                 | ARC18         |
| YLR170C                                          | APS1          | YOR132W                 | VPS17         |
| YBR194W                                          | SOY1          | YOR124C                 | UBP2          |
| YLR119W                                          | SRN2          | YDL083C                 | RPS16B        |
| YMR026C                                          | PEX12         | YKL048C                 | ELM1          |
| YMR216C                                          | SKY1          | YCR066W                 | RAD18         |
| YDL155W                                          | CLB3          | YGL253W                 | HXK2          |
| YPR017C                                          | DSS4          | YOR112W                 | CEX1          |
| YMR284W                                          | YKU70         | YLR135W                 | SLX4          |
| YML038C                                          | YMD8          | YML001W                 | YPT7          |
| YPL256C                                          | CLN2          | YLR425W                 | TUS1          |
| YHR157W                                          | REC104        | YER044C-A               | MEI4          |
| YLR043C                                          | TRX1          | YDR080W                 | VPS41         |
| YOR270C                                          | VPH1          | YHR200W                 | RPN10         |
| YPL037C                                          | EGD1          | YEL060C                 | PRB1          |
| YNR052C                                          | POP2          | YBR089C-A               | NHP6B         |
| YCR086W                                          | CSM1          | YHR114W                 | BZZ1          |
| YPL018W                                          | CTF19         | YGL151W                 | NUT1          |
| YJL154C                                          | VPS35         | YER122C                 | GLO3          |
| YHR205W                                          | SCH9          | YPL253C                 | VIK1          |
| YGR270W                                          | YTA7          | YGR054W                 | YGR054W       |
| YNL106C                                          | INP52         | YOR195W                 | SLK19         |
| YPL253C                                          | VIK1          | YHR200W                 | RPN10         |

| Predictions at threshold level 0.80 continued... |               |                         |               |
|--------------------------------------------------|---------------|-------------------------|---------------|
| Gene1 of predicted pair                          |               | Gene2 of predicted pair |               |
| Systematic Name                                  | Standard Name | Systematic Name         | Standard Name |
| YDR146C                                          | SWI5          | YBL047C                 | EDE1          |
| YDL083C                                          | RPS16B        | YML071C                 | COG8          |
| YBR200W                                          | BEM1          | YJR035W                 | RAD26         |
| YFR031C-A                                        | RPL2A         | YMR230W                 | RPS10B        |
| YDL239C                                          | ADY3          | YNL225C                 | CNM67         |
| YBR200W                                          | BEM1          | YER040W                 | GLN3          |
| YMR224C                                          | MRE11         | YMR142C                 | RPL13B        |
| YBR278W                                          | DPB3          | YOR043W                 | WHI2          |
| YJL029C                                          | VPS53         | YER143W                 | DDI1          |
| YGL066W                                          | SGF73         | YKL160W                 | ELF1          |
| YML115C                                          | VAN1          | YLR398C                 | SKI2          |
| YGR089W                                          | NNF2          | YHL010C                 | YHL010C       |
| YNL264C                                          | PDR17         | YLR398C                 | SKI2          |
| YHR156C                                          | LIN1          | YGL025C                 | PGD1          |
| YGL025C                                          | PGD1          | YLR398C                 | SKI2          |
| YHR073W                                          | OSH3          | YOL126C                 | MDH2          |
| YBR108W                                          | YBR108W       | YLR452C                 | SST2          |
| YIL159W                                          | BNR1          | YPL161C                 | BEM4          |
| YLR095C                                          | IOC2          | YLR119W                 | SRN2          |
| YML062C                                          | MFT1          | YNL004W                 | HRB1          |
| YHR200W                                          | RPN10         | YPL256C                 | CLN2          |
| YGR261C                                          | APL6          | YGL115W                 | SNF4          |
| YML095C                                          | RAD10         | YGL163C                 | RAD54         |
| YOR270C                                          | VPH1          | YNL041C                 | COG6          |
| YML016C                                          | PPZ1          | YFR030W                 | MET10         |
| YOR035C                                          | SHE4          | YML097C                 | VPS9          |
| YDR443C                                          | SSN2          | YLR192C                 | HCR1          |
| YBR215W                                          | HPC2          | YBR107C                 | IML3          |
| YDL127W                                          | PCL2          | YEL056W                 | HAT2          |

| Predictions at threshold level 0.80 continued... |               |                         |               |
|--------------------------------------------------|---------------|-------------------------|---------------|
| Gene1 of predicted pair                          |               | Gene2 of predicted pair |               |
| Systematic Name                                  | Standard Name | Systematic Name         | Standard Name |
| YNL297C                                          | MON2          | YAR014C                 | BUD14         |
| YBR215W                                          | HPC2          | YDR378C                 | LSM6          |
| YGL066W                                          | SGF73         | YPR120C                 | CLB5          |
| YPR046W                                          | MCM16         | YOL091W                 | SPO21         |
| YDL160C                                          | DHH1          | YMR125W                 | STO1          |
| YAL024C                                          | LTE1          | YCR086W                 | CSM1          |
| YOR212W                                          | STE4          | YCL032W                 | STE50         |
| YER144C                                          | UBP5          | YDL192W                 | ARF1          |
| YIL076W                                          | SEC28         | YAL002W                 | VPS8          |
| YLR447C                                          | VMA6          | YKL041W                 | VPS24         |
| YER107C                                          | GLE2          | YBR231C                 | SWC5          |
| YNL068C                                          | FKH2          | YLR386W                 | VAC14         |
| YKL110C                                          | KTI12         | YLR254C                 | NDL1          |
| YGR020C                                          | VMA7          | YHL020C                 | OPI1          |
| YNL218W                                          | MGS1          | YLR234W                 | TOP3          |
| YDR484W                                          | VPS52         | YDR137W                 | RGP1          |
| YOR043W                                          | WHI2          | YLR425W                 | TUS1          |
| YML117W                                          | NAB6          | YJL095W                 | BCK1          |
| YHR060W                                          | VMA22         | YHR039C-A               | VMA10         |
| YPL096C-A                                        | ERI1          | YJL148W                 | RPA34         |
| YBR200W                                          | BEM1          | YNL225C                 | CNM67         |
| YDR484W                                          | VPS52         | YMR152W                 | YIM1          |
| YKR020W                                          | VPS51         | YDL006W                 | PTC1          |
| YDR146C                                          | SWI5          | YDL006W                 | PTC1          |
| YAL024C                                          | LTE1          | YBL103C                 | RTG3          |
| YGR249W                                          | MGA1          | YBL103C                 | RTG3          |
| YBR108W                                          | YBR108W       | YOR270C                 | VPH1          |
| YLR381W                                          | CTF3          | YPR119W                 | CLB2          |
| YJR024C                                          | MDE1          | YMR153W                 | NUP53         |

| Predictions at threshold level 0.80 continued... |               |                         |               |
|--------------------------------------------------|---------------|-------------------------|---------------|
| Gene1 of predicted pair                          |               | Gene2 of predicted pair |               |
| Systematic Name                                  | Standard Name | Systematic Name         | Standard Name |
| YDR318W                                          | MCM21         | YJR035W                 | RAD26         |
| YLR119W                                          | SRN2          | YLR398C                 | SKI2          |
| YCR081W                                          | SRB8          | YDR146C                 | SWI5          |
| YMR172W                                          | HOT1          | YIL008W                 | URM1          |
| YPL042C                                          | SSN3          | YNR052C                 | POP2          |
| YNL058C                                          | YNL058C       | YDL192W                 | ARF1          |
| YGR241C                                          | YAP1802       | YFL026W                 | STE2          |
| YGL095C                                          | VPS45         | YOR035C                 | SHE4          |
| YDR004W                                          | RAD57         | YER162C                 | RAD4          |
| YHR178W                                          | STB5          | YMR127C                 | SAS2          |
| YDR004W                                          | RAD57         | YOL090W                 | MSH2          |
| YBR111W-A                                        | SUS1          | YBR009C                 | HHF1          |
| YGL078C                                          | DBP3          | YPL161C                 | BEM4          |
| YBR131W                                          | CCZ1          | YNL051W                 | COG5          |
| YOR106W                                          | VAM3          | YDL077C                 | VAM6          |
| YBR200W                                          | BEM1          | YFR030W                 | MET10         |
| YHR134W                                          | WSS1          | YHR178W                 | STB5          |
| YMR055C                                          | BUB2          | YGR188C                 | BUB1          |
| YJL124C                                          | LSM1          | YPR120C                 | CLB5          |
| YCR081W                                          | SRB8          | YOL051W                 | GAL11         |
| YDR080W                                          | VPS41         | YKR030W                 | GMH1          |
| YCL037C                                          | SRO9          | YPR032W                 | SRO7          |
| YMR216C                                          | SKY1          | YNR032W                 | PPG1          |
| YNR072W                                          | HXT17         | YJR084W                 | CSN12         |
| YPL037C                                          | EGD1          | YDR252W                 | BTT1          |
| YJR084W                                          | CSN12         | YEL060C                 | PRB1          |
| YDR507C                                          | GIN4          | YJL095W                 | BCK1          |
| YNL041C                                          | COG6          | YNL076W                 | MKS1          |
| YDR293C                                          | SSD1          | YJL053W                 | PEP8          |

| Predictions at threshold level 0.80 continued... |               |                         |               |
|--------------------------------------------------|---------------|-------------------------|---------------|
| Gene1 of predicted pair                          |               | Gene2 of predicted pair |               |
| Systematic Name                                  | Standard Name | Systematic Name         | Standard Name |
| YKL025C                                          | PAN3          | YOR127W                 | RGA1          |
| YPR017C                                          | DSS4          | YML071C                 | COG8          |
| YER016W                                          | BIM1          | YBR089C-A               | NHP6B         |
| YPL042C                                          | SSN3          | YMR038C                 | CCS1          |
| YDR202C                                          | RAV2          | YJR032W                 | CPR7          |
| YHR013C                                          | ARD1          | YJR084W                 | CSN12         |
| YGR239C                                          | PEX21         | YDR142C                 | PEX7          |
| YLR254C                                          | NDL1          | YOR141C                 | ARP8          |
| YNL206C                                          | RTT106        | YMR199W                 | CLN1          |
| YDL047W                                          | SIT4          | YLR182W                 | SWI6          |
| YCR020C-A                                        | MAK31         | YNL297C                 | MON2          |
| YJR032W                                          | CPR7          | YBR114W                 | RAD16         |
| YLR381W                                          | CTF3          | YJL006C                 | CTK2          |
| YEL065W                                          | SIT1          | YLR180W                 | SAM1          |
| YKL139W                                          | CTK1          | YNL054W                 | VAC7          |
| YEL043W                                          | YEL043W       | YGR105W                 | VMA21         |
| YGR072W                                          | UPF3          | YOR109W                 | INP53         |
| YOR023C                                          | AHC1          | YEL053C                 | MAK10         |
| YBL079W                                          | NUP170        | YGL163C                 | RAD54         |
| YNL230C                                          | ELA1          | YLR219W                 | MSC3          |
| YKL048C                                          | ELM1          | YLR094C                 | GIS3          |
| YHL031C                                          | GOS1          | YHL020C                 | OPI1          |
| YBR112C                                          | CYC8          | YGL025C                 | PGD1          |
| YBR200W                                          | BEM1          | YOR290C                 | SNF2          |
| YKR072C                                          | SIS2          | YHR178W                 | STB5          |
| YJL138C                                          | TIF2          | YPR119W                 | CLB2          |
| YPL022W                                          | RAD1          | YGR135W                 | PRE9          |
| YDR293C                                          | SSD1          | YPL195W                 | APL5          |
| YNL307C                                          | MCK1          | YLR180W                 | SAM1          |



| Predictions at threshold level 0.80 continued... |               |                         |               |
|--------------------------------------------------|---------------|-------------------------|---------------|
| Gene1 of predicted pair                          |               | Gene2 of predicted pair |               |
| Systematic Name                                  | Standard Name | Systematic Name         | Standard Name |
| YLR381W                                          | CTF3          | YHR114W                 | BZZ1          |
| YKR020W                                          | VPS51         | YBL025W                 | RRN10         |
| YGL237C                                          | HAP2          | YDR440W                 | DOT1          |
| YLR360W                                          | VPS38         | YHR012W                 | VPS29         |
| YCL001W                                          | RER1          | YGL115W                 | SNF4          |
| YDL184C                                          | RPL41A        | YLR094C                 | GIS3          |
| YDR309C                                          | GIC2          | YLR425W                 | TUS1          |
| YMR095C                                          | SNO1          | YBR171W                 | SEC66         |
| YCR034W                                          | FEN1          | YJL138C                 | TIF2          |
| YDR293C                                          | SSD1          | YBR171W                 | SEC66         |
| YLR094C                                          | GIS3          | YLR320W                 | MMS22         |
| YLR371W                                          | ROM2          | YML071C                 | COG8          |
| YKL048C                                          | ELM1          | YBL101C                 | ECM21         |
| YFR031C-A                                        | RPL2A         | YLR360W                 | VPS38         |
| YIL036W                                          | CST6          | YJL183W                 | MNN11         |
| YDL020C                                          | RPN4          | YGR020C                 | VMA7          |
| YIL053W                                          | RHR2          | YML001W                 | YPT7          |
| YDL101C                                          | DUN1          | YOR080W                 | DIA2          |
| YBR084C-A                                        | RPL19A        | YIL008W                 | URM1          |
| YIL036W                                          | CST6          | YJR060W                 | CBF1          |
| YER087C-B                                        | SBH1          | YLR418C                 | CDC73         |
| YBL008W                                          | HIR1          | YBR200W                 | BEM1          |
| YBL008W                                          | HIR1          | YOR368W                 | RAD17         |
| YML103C                                          | NUP188        | YOR195W                 | SLK19         |
| YLR396C                                          | VPS33         | YGL095C                 | VPS45         |
| YML006C                                          | GIS4          | YGL115W                 | SNF4          |
| YLR090W                                          | XDJ1          | YMR153W                 | NUP53         |
| YPR030W                                          | CSR2          | YLR370C                 | ARC18         |
| YOR112W                                          | CEX1          | YML001W                 | YPT7          |

| Predictions at threshold level 0.80 continued... |               |                         |               |
|--------------------------------------------------|---------------|-------------------------|---------------|
| Gene1 of predicted pair                          |               | Gene2 of predicted pair |               |
| Systematic Name                                  | Standard Name | Systematic Name         | Standard Name |
| YPR036W                                          | VMA13         | YER122C                 | GLO3          |
| YEL065W                                          | SIT1          | YOR043W                 | WHI2          |
| YBL102W                                          | SFT2          | YDR310C                 | SUM1          |
| YOR195W                                          | SLK19         | YNL206C                 | RTT106        |
| YLR288C                                          | MEC3          | YCR031C                 | RPS14A        |
| YJL154C                                          | VPS35         | YLR292C                 | SEC72         |
| YNL206C                                          | RTT106        | YIL008W                 | URM1          |
| YLR061W                                          | RPL22A        | YHR013C                 | ARD1          |
| YDR507C                                          | GIN4          | YNL116W                 | DMA2          |
| YLR238W                                          | FAR10         | YMR052W                 | FAR3          |
| YDR507C                                          | GIN4          | YNL078W                 | NIS1          |
| YJR140C                                          | HIR3          | YOR243C                 | PUS7          |
| YGR261C                                          | APL6          | YJL036W                 | SNX4          |
| YDL013W                                          | SLX5          | YPR046W                 | MCM16         |
| YMR055C                                          | BUB2          | YJR032W                 | CPR7          |
| YPL161C                                          | BEM4          | YLR180W                 | SAM1          |
| YMR080C                                          | NAM7          | YPL079W                 | RPL21B        |
| YNL307C                                          | MCK1          | YBL025W                 | RRN10         |
| YFR036W                                          | CDC26         | YLR180W                 | SAM1          |
| YKL025C                                          | PAN3          | YBR107C                 | IML3          |
| YNL069C                                          | RPL16B        | YNR032W                 | PPG1          |
| YDR484W                                          | VPS52         | YLR452C                 | SST2          |
| YDL223C                                          | HBT1          | YOL121C                 | RPS19A        |
| YML103C                                          | NUP188        | YFL047W                 | RGD2          |
| YIR005W                                          | IST3          | YAR014C                 | BUD14         |
| YBR107C                                          | IML3          | YPL018W                 | CTF19         |
| YJL127C                                          | SPT10         | YNL107W                 | YAF9          |
| YNL325C                                          | FIG4          | YCR053W                 | THR4          |
| YMR026C                                          | PEX12         | YFL023W                 | BUD27         |

| Predictions at threshold level 0.80 continued... |               |                         |               |
|--------------------------------------------------|---------------|-------------------------|---------------|
| Gene1 of predicted pair                          |               | Gene2 of predicted pair |               |
| Systematic Name                                  | Standard Name | Systematic Name         | Standard Name |
| YML016C                                          | PPZ1          | YLR182W                 | SWI6          |
| YMR095C                                          | SNO1          | YDR207C                 | UME6          |
| YLR425W                                          | TUS1          | YEL036C                 | ANP1          |
| YHL020C                                          | OPI1          | YER122C                 | GLO3          |
| YML115C                                          | VAN1          | YER049W                 | TPA1          |
| YDR174W                                          | HMO1          | YPR120C                 | CLB5          |
| YPR120C                                          | CLB5          | YOL054W                 | PSH1          |
| YBL103C                                          | RTG3          | YGL115W                 | SNF4          |
| YHR134W                                          | WSS1          | YMR055C                 | BUB2          |
| YBL058W                                          | SHP1          | YLR094C                 | GIS3          |
| YHR134W                                          | WSS1          | YMR127C                 | SAS2          |
| YML067C                                          | ERV41         | YKR014C                 | YPT52         |
| YFR010W                                          | UBP6          | YMR198W                 | CIK1          |
| YDL042C                                          | SIR2          | YGR252W                 | GCN5          |
| YMR026C                                          | PEX12         | YLR191W                 | PEX13         |
| YLR288C                                          | MEC3          | YGL019W                 | CKB1          |
| YNL054W                                          | VAC7          | YBR200W                 | BEM1          |
| YDL116W                                          | NUP84         | YLR429W                 | CRN1          |
| YLR337C                                          | VRP1          | YOR332W                 | VMA4          |
| YDR207C                                          | UME6          | YMR230W                 | RPS10B        |
| YKL126W                                          | YPK1          | YBR036C                 | CSG2          |
| YDR477W                                          | SNF1          | YER144C                 | UBP5          |
| YFR032C-A                                        | RPL29         | YML115C                 | VAN1          |
| YMR142C                                          | RPL13B        | YLR398C                 | SKI2          |
| YDR289C                                          | RTT103        | YNL147W                 | LSM7          |
| YIL034C                                          | CAP2          | YJR135C                 | MCM22         |
| YNL264C                                          | PDR17         | YER118C                 | SHO1          |
| YDL223C                                          | HBT1          | YMR311C                 | GLC8          |
| YEL065W                                          | SIT1          | YKL139W                 | CTK1          |

| Predictions at threshold level 0.80 continued... |               |                         |               |
|--------------------------------------------------|---------------|-------------------------|---------------|
| Gene1 of predicted pair                          |               | Gene2 of predicted pair |               |
| Systematic Name                                  | Standard Name | Systematic Name         | Standard Name |
| YBR107C                                          | IML3          | YMR038C                 | CCS1          |
| YPL234C                                          | TFP3          | YHR039C-A               | VMA10         |
| YJR056C                                          | YJR056C       | YLR452C                 | SST2          |
| YBR217W                                          | ATG12         | YLR398C                 | SKI2          |
| YPL161C                                          | BEM4          | YKL041W                 | VPS24         |
| YKL025C                                          | PAN3          | YBR171W                 | SEC66         |
| YHR013C                                          | ARD1          | YLR306W                 | UBC12         |
| YDR443C                                          | SSN2          | YGL025C                 | PGD1          |
| YHR114W                                          | BZZ1          | YGR188C                 | BUB1          |
| YAL024C                                          | LTE1          | YOR043W                 | WHI2          |
| YPL240C                                          | HSP82         | YLR419W                 | YLR419W       |
| YKL032C                                          | IXR1          | YGL031C                 | RPL24A        |
| YNL215W                                          | IES2          | YLR234W                 | TOP3          |
| YNL243W                                          | SLA2          | YLR206W                 | ENT2          |
| YLR337C                                          | VRP1          | YJL095W                 | BCK1          |
| YMR172W                                          | HOT1          | YLR386W                 | VAC14         |
| YDR202C                                          | RAV2          | YHR039C-A               | VMA10         |
| YIL076W                                          | SEC28         | YJR056C                 | YJR056C       |
| YFR032C-A                                        | RPL29         | YJL183W                 | MNN11         |
| YHR079C                                          | IRE1          | YHR098C                 | SFB3          |
| YDR507C                                          | GIN4          | YJL157C                 | FAR1          |
| YER001W                                          | MNN1          | YEL036C                 | ANP1          |
| YLR254C                                          | NDL1          | YDR183W                 | PLP1          |
| YKL007W                                          | CAP1          | YNL307C                 | MCK1          |
| YCR077C                                          | PAT1          | YJL095W                 | BCK1          |
| YCR066W                                          | RAD18         | YNL051W                 | COG5          |
| YAL024C                                          | LTE1          | YLR216C                 | CPR6          |
| YMR224C                                          | MRE11         | YFL023W                 | BUD27         |
| YNL025C                                          | SSN8          | YIL076W                 | SEC28         |

| Predictions at threshold level 0.80 continued... |               |                         |               |
|--------------------------------------------------|---------------|-------------------------|---------------|
| Gene1 of predicted pair                          |               | Gene2 of predicted pair |               |
| Systematic Name                                  | Standard Name | Systematic Name         | Standard Name |
| YOR195W                                          | SLK19         | YJR063W                 | RPA12         |
| YLR386W                                          | VAC14         | YNL325C                 | FIG4          |
| YPL256C                                          | CLN2          | YDR310C                 | SUM1          |
| YNL243W                                          | SLA2          | YMR022W                 | UBC7          |
| YLL007C                                          | YLL007C       | YDR318W                 | MCM21         |
| YKR061W                                          | KTR2          | YLR410W                 | VIP1          |
| YKL139W                                          | CTK1          | YKL041W                 | VPS24         |
| YML115C                                          | VAN1          | YKL126W                 | YPK1          |
| YKL160W                                          | ELF1          | YIR005W                 | IST3          |
| YGR108W                                          | CLB1          | YLR079W                 | SIC1          |
| YMR224C                                          | MRE11         | YFR030W                 | MET10         |
| YPR046W                                          | MCM16         | YJL095W                 | BCK1          |
| YOR132W                                          | VPS17         | YLR386W                 | VAC14         |
| YOL111C                                          | MDY2          | YMR152W                 | YIM1          |
| YJL058C                                          | BIT61         | YDR254W                 | CHL4          |
| YHL031C                                          | GOS1          | YEL051W                 | VMA8          |
| YBR108W                                          | YBR108W       | YOL081W                 | IRA2          |
| YMR004W                                          | MVP1          | YGL212W                 | VAM7          |
| YNL166C                                          | BNI5          | YDR310C                 | SUM1          |
| YHR010W                                          | RPL27A        | YJR090C                 | GRR1          |
| YLL039C                                          | UBI4          | YMR276W                 | DSK2          |
| YMR039C                                          | SUB1          | YOL145C                 | CTR9          |
| YCR077C                                          | PAT1          | YCR086W                 | CSM1          |
| YOR290C                                          | SNF2          | YNL058C                 | YNL058C       |
| YBR215W                                          | HPC2          | YOR368W                 | RAD17         |
| YHR052W                                          | CIC1          | YGL189C                 | RPS26A        |
| YPR018W                                          | RLF2          | YDL042C                 | SIR2          |
| YGL237C                                          | HAP2          | YPR046W                 | MCM16         |
| YBR215W                                          | HPC2          | YDR076W                 | RAD55         |

| Predictions at threshold level 0.80 continued... |               |                         |               |
|--------------------------------------------------|---------------|-------------------------|---------------|
| Gene1 of predicted pair                          |               | Gene2 of predicted pair |               |
| Systematic Name                                  | Standard Name | Systematic Name         | Standard Name |
| YMR039C                                          | SUB1          | YJL124C                 | LSM1          |
| YKL048C                                          | ELM1          | YBR019C                 | GAL10         |
| YHR013C                                          | ARD1          | YGR135W                 | PRE9          |
| YKL048C                                          | ELM1          | YNL076W                 | MKS1          |
| YDL155W                                          | CLB3          | YMR038C                 | CCS1          |
| YOR080W                                          | DIA2          | YOL090W                 | MSH2          |
| YJL124C                                          | LSM1          | YNL147W                 | LSM7          |
| YLR381W                                          | CTF3          | YIL103W                 | DPH1          |
| YML095C                                          | RAD10         | YDL047W                 | SIT4          |
| YLR386W                                          | VAC14         | YJR063W                 | RPA12         |
| YLR119W                                          | SRN2          | YGL212W                 | VAM7          |
| YGL163C                                          | RAD54         | YMR038C                 | CCS1          |
| YMR199W                                          | CLN1          | YER110C                 | KAP123        |
| YMR092C                                          | AIP1          | YIL034C                 | CAP2          |
| YGR004W                                          | PEX31         | YLR324W                 | PEX30         |
| YJR084W                                          | CSN12         | YMR230W                 | RPS10B        |
| YNL206C                                          | RTT106        | YDR289C                 | RTT103        |
| YBR093C                                          | PHO5          | YNL107W                 | YAF9          |
| YPR046W                                          | MCM16         | YEL056W                 | HAT2          |
| YHR152W                                          | SPO12         | YBL047C                 | EDE1          |
| YNL166C                                          | BNI5          | YAR014C                 | BUD14         |
| YIR003W                                          | YIR003W       | YIL034C                 | CAP2          |
| YGL178W                                          | MPT5          | YBR089C-A               | NHP6B         |
| YJR060W                                          | CBF1          | YHR115C                 | DMA1          |
| YNR072W                                          | HXT17         | YER162C                 | RAD4          |
| YNL087W                                          | TCB2          | YNL238W                 | KEX2          |
| YDR335W                                          | MSN5          | YMR038C                 | CCS1          |
| YLR079W                                          | SIC1          | YOR039W                 | CKB2          |
| YGR261C                                          | APL6          | YHR060W                 | VMA22         |

| Predictions at threshold level 0.80 continued... |               |                         |               |
|--------------------------------------------------|---------------|-------------------------|---------------|
| Gene1 of predicted pair                          |               | Gene2 of predicted pair |               |
| Systematic Name                                  | Standard Name | Systematic Name         | Standard Name |
| YGR071C                                          | YGR071C       | YDR318W                 | MCM21         |
| YLR360W                                          | VPS38         | YHR161C                 | YAP1801       |
| YAL024C                                          | LTE1          | YLR381W                 | CTF3          |
| YIL034C                                          | CAP2          | YLR447C                 | VMA6          |
| YGR014W                                          | MSB2          | YJL183W                 | MNN11         |
| YGR249W                                          | MGA1          | YBR019C                 | GAL10         |
| YLL007C                                          | YLL007C       | YHR178W                 | STB5          |
| YGL174W                                          | BUD13         | YKL074C                 | MUD2          |
| YGR072W                                          | UPF3          | YPL234C                 | TFP3          |
| YMR055C                                          | BUB2          | YDR144C                 | MKC7          |
| YKL213C                                          | DOA1          | YLR182W                 | SWI6          |
| YHR205W                                          | SCH9          | YOR027W                 | STI1          |
| YPL024W                                          | RMI1          | YGL003C                 | CDH1          |
| YKL048C                                          | ELM1          | YDL192W                 | ARF1          |
| YMR179W                                          | SPT21         | YMR038C                 | CCS1          |
| YBL003C                                          | HTA2          | YPL248C                 | GAL4          |
| YBR131W                                          | CCZ1          | YML071C                 | COG8          |
| YHR134W                                          | WSS1          | YBL021C                 | HAP3          |
| YCR077C                                          | PAT1          | YOR308C                 | SNU66         |
| YKL139W                                          | CTK1          | YHR111W                 | UBA4          |
| YKR020W                                          | VPS51         | YDR153C                 | ENT5          |
| YER116C                                          | SLX8          | YBR036C                 | CSG2          |
| YPR102C                                          | RPL11A        | YER102W                 | RPS8B         |
| YHR134W                                          | WSS1          | YCL037C                 | SRO9          |
| YJL036W                                          | SNX4          | YMR216C                 | SKY1          |
| YMR038C                                          | CCS1          | YAL002W                 | VPS8          |
| YKL139W                                          | CTK1          | YMR055C                 | BUB2          |
| YLR371W                                          | ROM2          | YLR370C                 | ARC18         |
| YKL007W                                          | CAP1          | YHR111W                 | UBA4          |

| Predictions at threshold level 0.80 continued... |               |                         |               |
|--------------------------------------------------|---------------|-------------------------|---------------|
| Gene1 of predicted pair                          |               | Gene2 of predicted pair |               |
| Systematic Name                                  | Standard Name | Systematic Name         | Standard Name |
| YPR046W                                          | MCM16         | YDR207C                 | UME6          |
| YGL087C                                          | MMS2          | YDR155C                 | CPR1          |
| YKR020W                                          | VPS51         | YJR033C                 | RAV1          |
| YMR224C                                          | MRE11         | YLR425W                 | TUS1          |
| YNL215W                                          | IES2          | YNR052C                 | POP2          |
| YMR055C                                          | BUB2          | YHR200W                 | RPN10         |
| YGL190C                                          | CDC55         | YNL250W                 | RAD50         |
| YNL051W                                          | COG5          | YNR032W                 | PPG1          |
| YDL101C                                          | DUN1          | YDR207C                 | UME6          |
| YAL024C                                          | LTE1          | YLR410W                 | VIP1          |
| YPR046W                                          | MCM16         | YLR398C                 | SKI2          |
| YNL025C                                          | SSN8          | YIR005W                 | IST3          |
| YMR199W                                          | CLN1          | YLR371W                 | ROM2          |
| YNL264C                                          | PDR17         | YNL107W                 | YAF9          |
| YJL176C                                          | SWI3          | YFR010W                 | UBP6          |
| YLR079W                                          | SIC1          | YLR370C                 | ARC18         |
| YLR192C                                          | HCR1          | YPL195W                 | APL5          |
| YAL024C                                          | LTE1          | YDL192W                 | ARF1          |
| YGL124C                                          | MON1          | YHR114W                 | BZZ1          |
| YKL032C                                          | IXR1          | YPR046W                 | MCM16         |
| YML095C                                          | RAD10         | YJR032W                 | CPR7          |
| YEL050C                                          | RML2          | YDL047W                 | SIT4          |
| YGL200C                                          | EMP24         | YML097C                 | VPS9          |
| YDR295C                                          | HDA2          | YPR179C                 | HDA3          |
| YLR386W                                          | VAC14         | YGR135W                 | PRE9          |
| YDR363W-A                                        | SEM1          | YPR120C                 | CLB5          |
| YNL041C                                          | COG6          | YJR084W                 | CSN12         |
| YDR477W                                          | SNF1          | YML115C                 | VAN1          |
| YGL215W                                          | CLG1          | YOR080W                 | DIA2          |



| Predictions at threshold level 0.80 continued... |               |                         |               |
|--------------------------------------------------|---------------|-------------------------|---------------|
| Gene1 of predicted pair                          |               | Gene2 of predicted pair |               |
| Systematic Name                                  | Standard Name | Systematic Name         | Standard Name |
| YOR066W                                          | MSA1          | YPR046W                 | MCM16         |
| YDR105C                                          | TMS1          | YPR149W                 | NCE102        |
| YNL032W                                          | SIW14         | YJR056C                 | YJR056C       |
| YOR106W                                          | VAM3          | YER049W                 | TPA1          |
| YHR187W                                          | IKI1          | YDL047W                 | SIT4          |
| YBR215W                                          | HPC2          | YLR182W                 | SWI6          |
| YGL200C                                          | EMP24         | YCL001W                 | RER1          |
| YOR066W                                          | MSA1          | YMR214W                 | SCJ1          |
| YDR293C                                          | SSD1          | YOR358W                 | HAP5          |
| YGR070W                                          | ROM1          | YLR425W                 | TUS1          |
| YGR054W                                          | YGR054W       | YHR012W                 | VPS29         |
| YMR026C                                          | PEX12         | YPL161C                 | BEM4          |
| YLR337C                                          | VRP1          | YJL190C                 | RPS22A        |
| YDR293C                                          | SSD1          | YOR023C                 | AHC1          |
| YNL025C                                          | SSN8          | YHR167W                 | THP2          |
| YMR055C                                          | BUB2          | YCR077C                 | PAT1          |
| YER044C-A                                        | MEI4          | YMR133W                 | REC114        |
| YNL201C                                          | PSY2          | YJR135C                 | MCM22         |
| YHL020C                                          | OPI1          | YJR033C                 | RAV1          |
| YPL024W                                          | RMI1          | YJR084W                 | CSN12         |
| YGR108W                                          | CLB1          | YGL115W                 | SNF4          |
| YLR386W                                          | VAC14         | YPR051W                 | MAK3          |
| YDR142C                                          | PEX7          | YGL153W                 | PEX14         |
| YPL024W                                          | RMI1          | YCL037C                 | SRO9          |
| YLR083C                                          | EMP70         | YPL234C                 | TFP3          |
| YBR111W-A                                        | SUS1          | YBR010W                 | HHT1          |
| YDR103W                                          | STE5          | YDR335W                 | MSN5          |
| YHR156C                                          | LIN1          | YNL032W                 | SIW14         |
| YJL124C                                          | LSM1          | YJR060W                 | CBF1          |

| Predictions at threshold level 0.80 continued... |               |                         |               |
|--------------------------------------------------|---------------|-------------------------|---------------|
| Gene1 of predicted pair                          |               | Gene2 of predicted pair |               |
| Systematic Name                                  | Standard Name | Systematic Name         | Standard Name |
| YIL159W                                          | BNR1          | YMR016C                 | SOK2          |
| YNL307C                                          | MCK1          | YOR066W                 | MSA1          |
| YCR020C-A                                        | MAK31         | YGR020C                 | VMA7          |
| YBR107C                                          | IML3          | YKL114C                 | APN1          |
| YGR241C                                          | YAP1802       | YDR358W                 | GGA1          |
| YPL256C                                          | CLN2          | YJL095W                 | BCK1          |
| YMR224C                                          | MRE11         | YGR249W                 | MGA1          |
| YDR137W                                          | RGP1          | YER161C                 | SPT2          |
| YGR129W                                          | SYF2          | YCR063W                 | BUD31         |
| YDR477W                                          | SNF1          | YNL041C                 | COG6          |
| YDR383C                                          | NKP1          | YKL139W                 | CTK1          |
| YGL124C                                          | MON1          | YNL116W                 | DMA2          |
| YLR192C                                          | HCR1          | YML071C                 | COG8          |
| YGR081C                                          | SLX9          | YGL163C                 | RAD54         |
| YGL025C                                          | PGD1          | YKR048C                 | NAP1          |
| YLR248W                                          | RCK2          | YGL158W                 | RCK1          |
| YMR243C                                          | ZRC1          | YGL158W                 | RCK1          |
| YGL078C                                          | DBP3          | YFR010W                 | UBP6          |
| YGL178W                                          | MPT5          | YLR330W                 | CHS5          |
| YGL078C                                          | DBP3          | YHR039C-A               | VMA10         |
| YPL161C                                          | BEM4          | YER040W                 | GLN3          |
| YOR043W                                          | WHI2          | YOR038C                 | HIR2          |
| YOL018C                                          | TLG2          | YDL047W                 | SIT4          |
| YOR069W                                          | VPS5          | YPL105C                 | YPL105C       |
| YKL116C                                          | PRR1          | YDR310C                 | SUM1          |
| YDR335W                                          | MSN5          | YOR141C                 | ARP8          |
| YLR234W                                          | TOP3          | YOR014W                 | RTS1          |
| YML071C                                          | COG8          | YAR014C                 | BUD14         |
| YKL116C                                          | PRR1          | YNL032W                 | SIW14         |

| Predictions at threshold level 0.80 continued... |               |                         |               |
|--------------------------------------------------|---------------|-------------------------|---------------|
| Gene1 of predicted pair                          |               | Gene2 of predicted pair |               |
| Systematic Name                                  | Standard Name | Systematic Name         | Standard Name |
| YHL031C                                          | GOS1          | YKR001C                 | VPS1          |
| YGR261C                                          | APL6          | YCR066W                 | RAD18         |
| YDR363W-A                                        | SEM1          | YOR141C                 | ARP8          |
| YDR108W                                          | GSG1          | YNL238W                 | KEX2          |
| YDL184C                                          | RPL41A        | YHR081W                 | LRP1          |
| YGL025C                                          | PGD1          | YER162C                 | RAD4          |
| YLR192C                                          | HCR1          | YNL307C                 | MCK1          |
| YEL009C                                          | GCN4          | YOR290C                 | SNF2          |
| YOR290C                                          | SNF2          | YNL236W                 | SIN4          |
| YPR017C                                          | DSS4          | YDR207C                 | UME6          |
| YBR045C                                          | GIP1          | YDR103W                 | STE5          |
| YHR160C                                          | PEX18         | YOL044W                 | PEX15         |
| YLR360W                                          | VPS38         | YDR144C                 | MKC7          |
| YDR440W                                          | DOT1          | YLR182W                 | SWI6          |
| YBR215W                                          | HPC2          | YJR005W                 | APL1          |
| YNL087W                                          | TCB2          | YOR270C                 | VPH1          |
| YNL044W                                          | YIP3          | YER122C                 | GLO3          |
| YDR146C                                          | SWI5          | YPL253C                 | VIK1          |
| YDR293C                                          | SSD1          | YBL102W                 | SFT2          |
| YPL037C                                          | EGD1          | YLR370C                 | ARC18         |
| YFL013C                                          | IES1          | YGL174W                 | BUD13         |
| YNL106C                                          | INP52         | YBL027W                 | RPL19B        |
| YKL139W                                          | CTK1          | YER068W                 | MOT2          |
| YIL008W                                          | URM1          | YJL187C                 | SWE1          |
| YDR261C                                          | EXG2          | YOL121C                 | RPS19A        |
| YGR270W                                          | YTA7          | YGL151W                 | NUT1          |
| YGR020C                                          | VMA7          | YLR447C                 | VMA6          |
| YER001W                                          | MNN1          | YFL048C                 | EMP47         |
| YOR112W                                          | CEX1          | YMR004W                 | MVP1          |

| Predictions at threshold level 0.80 continued... |               |                         |               |
|--------------------------------------------------|---------------|-------------------------|---------------|
| Gene1 of predicted pair                          |               | Gene2 of predicted pair |               |
| Systematic Name                                  | Standard Name | Systematic Name         | Standard Name |
| YHR073W                                          | OSH3          | YOR358W                 | HAP5          |
| YNL229C                                          | URE2          | YDR264C                 | AKR1          |
| YKR020W                                          | VPS51         | YEL051W                 | VMA8          |
| YML095C                                          | RAD10         | YDR076W                 | RAD55         |
| YCL037C                                          | SRO9          | YHR039C-A               | VMA10         |
| YDR293C                                          | SSD1          | YER120W                 | SCS2          |
| YBR171W                                          | SEC66         | YPL158C                 | YPL158C       |
| YMR224C                                          | MRE11         | YKL116C                 | PRR1          |
| YHR012W                                          | VPS29         | YNR032W                 | PPG1          |
| YJL006C                                          | CTK2          | YPL018W                 | CTF19         |
| YNL041C                                          | COG6          | YEL060C                 | PRB1          |
| YJR033C                                          | RAV1          | YDR310C                 | SUM1          |
| YGR105W                                          | VMA21         | YMR054W                 | STV1          |
| YDL013W                                          | SLX5          | YPR120C                 | CLB5          |
| YDL116W                                          | NUP84         | YFL023W                 | BUD27         |
| YAL024C                                          | LTE1          | YBR274W                 | CHK1          |
| YGR129W                                          | SYF2          | YGL174W                 | BUD13         |
| YMR199W                                          | CLN1          | YGL208W                 | SIP2          |
| YLL039C                                          | UBI4          | YBL101C                 | ECM21         |
| YLR079W                                          | SIC1          | YKR024C                 | DBP7          |
| YGR104C                                          | SRB5          | YBR009C                 | HHF1          |
| YMR095C                                          | SNO1          | YPL161C                 | BEM4          |
| YOR033C                                          | EXO1          | YOL090W                 | MSH2          |
| YGL013C                                          | PDR1          | YPR119W                 | CLB2          |
| YOL111C                                          | MDY2          | YPR046W                 | MCM16         |
| YOR109W                                          | INP53         | YAR014C                 | BUD14         |
| YJL172W                                          | CPS1          | YLR441C                 | RPS1A         |
| YFR031C-A                                        | RPL2A         | YER162C                 | RAD4          |
| YER139C                                          | YER139C       | YMR230W                 | RPS10B        |

| Predictions at threshold level 0.80 continued... |               |                         |               |
|--------------------------------------------------|---------------|-------------------------|---------------|
| Gene1 of predicted pair                          |               | Gene2 of predicted pair |               |
| Systematic Name                                  | Standard Name | Systematic Name         | Standard Name |
| YBL103C                                          | RTG3          | YPL195W                 | APL5          |
| YDR383C                                          | NKP1          | YNR052C                 | POP2          |
| YIL076W                                          | SEC28         | YOR112W                 | CEX1          |
| YJL176C                                          | SWI3          | YNL079C                 | TPM1          |
| YDR156W                                          | RPA14         | YDR439W                 | LRS4          |
| YHR039C-A                                        | VMA10         | YOR368W                 | RAD17         |
| YLR452C                                          | SST2          | YDR310C                 | SUM1          |
| YPR120C                                          | CLB5          | YGR188C                 | BUB1          |
| YNL025C                                          | SSN8          | YDR378C                 | LSM6          |
| YNL047C                                          | SLM2          | YJL058C                 | BIT61         |
| YEL065W                                          | SIT1          | YGL003C                 | CDH1          |
| YBL051C                                          | PIN4          | YJL187C                 | SWE1          |
| YMR133W                                          | REC114        | YDR358W                 | GGA1          |
| YDL077C                                          | VAM6          | YEL042W                 | GDA1          |
| YCL001W                                          | RER1          | YGL054C                 | ERV14         |
| YGR020C                                          | VMA7          | YNL297C                 | MON2          |
| YNL051W                                          | COG5          | YDR153C                 | ENT5          |
| YLR410W                                          | VIP1          | YDL047W                 | SIT4          |
| YKL139W                                          | CTK1          | YCR086W                 | CSM1          |
| YBR194W                                          | SOY1          | YIL076W                 | SEC28         |
| YDR156W                                          | RPA14         | YOR141C                 | ARP8          |
| YNL025C                                          | SSN8          | YKL160W                 | ELF1          |
| YNL106C                                          | INP52         | YDR439W                 | LRS4          |
| YIL008W                                          | URM1          | YDR289C                 | RTT103        |
| YHR010W                                          | RPL27A        | YGL246C                 | RAI1          |
| YLR447C                                          | VMA6          | YGR105W                 | VMA21         |
| YBR215W                                          | HPC2          | YER139C                 | YER139C       |
| YKR035W-A                                        | DID2          | YOR035C                 | SHE4          |
| YMR116C                                          | ASC1          | YBL025W                 | RRN10         |

| Predictions at threshold level 0.80 continued... |               |                         |               |
|--------------------------------------------------|---------------|-------------------------|---------------|
| Gene1 of predicted pair                          |               | Gene2 of predicted pair |               |
| Systematic Name                                  | Standard Name | Systematic Name         | Standard Name |
| YLR337C                                          | VRP1          | YOR023C                 | AHC1          |
| YDR293C                                          | SSD1          | YER110C                 | KAP123        |
| YJR040W                                          | GEF1          | YCL001W                 | RER1          |
| YLR452C                                          | SST2          | YDL083C                 | RPS16B        |
| YDR245W                                          | MNN10         | YOR308C                 | SNU66         |
| YLR192C                                          | HCR1          | YMR230W                 | RPS10B        |
| YOR195W                                          | SLK19         | YDR439W                 | LRS4          |
| YEL027W                                          | CUP5          | YKL119C                 | VPH2          |
| YDR129C                                          | SAC6          | YDL155W                 | CLB3          |
| YMR039C                                          | SUB1          | YKR072C                 | SIS2          |
| YJR140C                                          | HIR3          | YCL037C                 | SRO9          |
| YKL048C                                          | ELM1          | YNL225C                 | CNM67         |
| YMR039C                                          | SUB1          | YNL107W                 | YAF9          |
| YGL178W                                          | MPT5          | YPL031C                 | PHO85         |
| YBR073W                                          | RDH54         | YPR046W                 | MCM16         |
| YGL087C                                          | MMS2          | YHR012W                 | VPS29         |
| YPL240C                                          | HSP82         | YMR165C                 | PAH1          |
| YPR072W                                          | NOT5          | YNL236W                 | SIN4          |
| YML115C                                          | VAN1          | YOR035C                 | SHE4          |
| YMR246W                                          | FAA4          | YOR059C                 | YOR059C       |
| YML038C                                          | YMD8          | YEL043W                 | YEL043W       |
| YMR224C                                          | MRE11         | YIL076W                 | SEC28         |
| YOR195W                                          | SLK19         | YGR188C                 | BUB1          |
| YKL139W                                          | CTK1          | YPR120C                 | CLB5          |
| YPR084W                                          | YPR084W       | YEL051W                 | VMA8          |
| YMR039C                                          | SUB1          | YDR146C                 | SWI5          |
| YGR241C                                          | YAP1802       | YDL161W                 | ENT1          |
| YMR026C                                          | PEX12         | YLR441C                 | RPS1A         |
| YDR225W                                          | HTA1          | YOR368W                 | RAD17         |

| Predictions at threshold level 0.80 continued... |               |                         |               |
|--------------------------------------------------|---------------|-------------------------|---------------|
| Gene1 of predicted pair                          |               | Gene2 of predicted pair |               |
| Systematic Name                                  | Standard Name | Systematic Name         | Standard Name |
| YDL116W                                          | NUP84         | YNL107W                 | YAF9          |
| YKL032C                                          | IXR1          | YHL002W                 | HSE1          |
| YML115C                                          | VAN1          | YER139C                 | YER139C       |
| YML115C                                          | VAN1          | YNL076W                 | MKS1          |
| YDR477W                                          | SNF1          | YBL025W                 | RRN10         |
| YML001W                                          | YPT7          | YEL051W                 | VMA8          |
| YLR441C                                          | RPS1A         | YEL060C                 | PRB1          |
| YGL161C                                          | YIP5          | YDR076W                 | RAD55         |
| YPR120C                                          | CLB5          | YGL175C                 | SAE2          |
| YDR477W                                          | SNF1          | YJL172W                 | CPS1          |
| YOR141C                                          | ARP8          | YNL225C                 | CNM67         |
| YHR060W                                          | VMA22         | YGL124C                 | MON1          |
| YPL105C                                          | YPL105C       | YPR032W                 | SRO7          |
| YBL058W                                          | SHP1          | YEL053C                 | MAK10         |
| YCR020C-A                                        | MAK31         | YHL020C                 | OPI1          |
| YLR006C                                          | SSK1          | YGR152C                 | RSR1          |
| YNL238W                                          | KEX2          | YJR032W                 | CPR7          |
| YDR443C                                          | SSN2          | YOR043W                 | WHI2          |
| YGR108W                                          | CLB1          | YOL067C                 | RTG1          |
| YGR135W                                          | PRE9          | YLR370C                 | ARC18         |
| YPL050C                                          | MNN9          | YFR036W                 | CDC26         |
| YNL025C                                          | SSN8          | YOR038C                 | HIR2          |
| YMR055C                                          | BUB2          | YHR115C                 | DMA1          |
| YML103C                                          | NUP188        | YIL036W                 | CST6          |
| YIR009W                                          | MSL1          | YKR099W                 | BAS1          |
| YHR156C                                          | LIN1          | YFL023W                 | BUD27         |
| YJL124C                                          | LSM1          | YLR399C                 | BDF1          |
| YDR507C                                          | GIN4          | YLR425W                 | TUS1          |
| YKL010C                                          | UFD4          | YLL039C                 | UBI4          |

| Predictions at threshold level 0.80 continued... |               |                         |               |
|--------------------------------------------------|---------------|-------------------------|---------------|
| Gene1 of predicted pair                          |               | Gene2 of predicted pair |               |
| Systematic Name                                  | Standard Name | Systematic Name         | Standard Name |
| YPL042C                                          | SSN3          | YLR410W                 | VIP1          |
| YHR134W                                          | WSS1          | YHR114W                 | BZZ1          |
| YMR164C                                          | MSS11         | YMR199W                 | CLN1          |
| YER087C-B                                        | SBH1          | YDR392W                 | SPT3          |
| YHL031C                                          | GOS1          | YOR327C                 | SNC2          |
| YPR017C                                          | DSS4          | YDR108W                 | GSG1          |
| YLR386W                                          | VAC14         | YER040W                 | GLN3          |
| YLR441C                                          | RPS1A         | YNL307C                 | MCK1          |
| YNL329C                                          | PEX6          | YDR440W                 | DOT1          |
| YAL024C                                          | LTE1          | YML016C                 | PPZ1          |
| YDL006W                                          | PTC1          | YDR358W                 | GGA1          |
| YMR216C                                          | SKY1          | YJL004C                 | SYS1          |
| YIL103W                                          | DPH1          | YML112W                 | CTK3          |
| YKL116C                                          | PRR1          | YPL161C                 | BEM4          |
| YNR072W                                          | HXT17         | YMR152W                 | YIM1          |
| YKR001C                                          | VPS1          | YCL001W                 | RER1          |
| YDR202C                                          | RAV2          | YEL043W                 | YEL043W       |
| YFL003C                                          | MSH4          | YGL249W                 | ZIP2          |
| YJL154C                                          | VPS35         | YML038C                 | YMD8          |
| YMR172W                                          | HOT1          | YGR108W                 | CLB1          |
| YPR017C                                          | DSS4          | YJR033C                 | RAV1          |
| YNL243W                                          | SLA2          | YJR058C                 | APS2          |
| YML012W                                          | ERV25         | YLR093C                 | NYV1          |
| YER110C                                          | KAP123        | YBR009C                 | HHF1          |
| YLR095C                                          | IOC2          | YOR290C                 | SNF2          |
| YCL037C                                          | SRO9          | YPL079W                 | RPL21B        |
| YJL210W                                          | PEX2          | YDR244W                 | PEX5          |
| YAL024C                                          | LTE1          | YER162C                 | RAD4          |
| YGL003C                                          | CDH1          | YER122C                 | GLO3          |



| Predictions at threshold level 0.80 continued... |               |                         |               |
|--------------------------------------------------|---------------|-------------------------|---------------|
| Gene1 of predicted pair                          |               | Gene2 of predicted pair |               |
| Systematic Name                                  | Standard Name | Systematic Name         | Standard Name |
| YDR422C                                          | SIP1          | YGL179C                 | TOS3          |
| YPL106C                                          | SSE1          | YJL006C                 | CTK2          |
| YCR081W                                          | SRB8          | YER096W                 | SHC1          |
| YLR399C                                          | BDF1          | YNL031C                 | HHT2          |
| YNL238W                                          | KEX2          | YPL195W                 | APL5          |
| YPR046W                                          | MCM16         | YER122C                 | GLO3          |
| YER144C                                          | UBP5          | YBR280C                 | SAF1          |
| YHR205W                                          | SCH9          | YBR260C                 | RGD1          |
| YDR004W                                          | RAD57         | YHR013C                 | ARD1          |
| YDL020C                                          | RPN4          | YBR228W                 | SLX1          |
| YNL243W                                          | SLA2          | YPL031C                 | PHO85         |
| YHR098C                                          | SFB3          | YFL031W                 | HAC1          |
| YIL036W                                          | CST6          | YGL252C                 | RTG2          |
| YLR386W                                          | VAC14         | YLR102C                 | APC9          |
| YDL020C                                          | RPN4          | YGL237C                 | HAP2          |
| YLR095C                                          | IOC2          | YOR066W                 | MSA1          |
| YMR224C                                          | MRE11         | YGL163C                 | RAD54         |
| YFR024C-A                                        | LSB3          | YMR253C                 | YMR253C       |
| YEL051W                                          | VMA8          | YLR309C                 | IMH1          |
| YIL076W                                          | SEC28         | YBR171W                 | SEC66         |
| YGL178W                                          | MPT5          | YPR072W                 | NOT5          |
| YEL053C                                          | MAK10         | YAR014C                 | BUD14         |
| YLR095C                                          | IOC2          | YOL081W                 | IRA2          |
| YLR399C                                          | BDF1          | YNL236W                 | SIN4          |
| YDR378C                                          | LSM6          | YDR254W                 | CHL4          |
| YMR004W                                          | MVP1          | YDR137W                 | RGP1          |
| YOR033C                                          | EXO1          | YKL114C                 | APN1          |
| YLR320W                                          | MMS22         | YBR280C                 | SAF1          |
| YOR035C                                          | SHE4          | YOR036W                 | PEP12         |

| Predictions at threshold level 0.80 continued... |               |                         |               |
|--------------------------------------------------|---------------|-------------------------|---------------|
| Gene1 of predicted pair                          |               | Gene2 of predicted pair |               |
| Systematic Name                                  | Standard Name | Systematic Name         | Standard Name |
| YPR084W                                          | YPR084W       | YGL223C                 | COG1          |
| YDR174W                                          | HMO1          | YJL124C                 | LSM1          |
| YML103C                                          | NUP188        | YOR141C                 | ARP8          |
| YHR056C                                          | RSC30         | YKR082W                 | NUP133        |
| YDR293C                                          | SSD1          | YMR127C                 | SAS2          |
| YPR051W                                          | MAK3          | YDL006W                 | PTC1          |
| YNL054W                                          | VAC7          | YAR014C                 | BUD14         |
| YPL037C                                          | EGD1          | YJL004C                 | SYS1          |
| YHR079C                                          | IRE1          | YNR049C                 | MSO1          |
| YPL115C                                          | BEM3          | YAR014C                 | BUD14         |
| YMR199W                                          | CLN1          | YNL079C                 | TPM1          |
| YDR245W                                          | MNN10         | YNL107W                 | YAF9          |
| YFR032C-A                                        | RPL29         | YLR320W                 | MMS22         |
| YGR261C                                          | APL6          | YJR033C                 | RAV1          |
| YOR332W                                          | VMA4          | YJL183W                 | MNN11         |
| YGL124C                                          | MON1          | YNL107W                 | YAF9          |
| YOR109W                                          | INP53         | YOR327C                 | SNC2          |
| YCR081W                                          | SRB8          | YPL161C                 | BEM4          |
| YOR132W                                          | VPS17         | YDR358W                 | GGA1          |
| YMR026C                                          | PEX12         | YMR133W                 | REC114        |
| YDR254W                                          | CHL4          | YDR310C                 | SUM1          |
| YOR035C                                          | SHE4          | YMR214W                 | SCJ1          |
| YGL025C                                          | PGD1          | YPR120C                 | CLB5          |
| YGR019W                                          | UGA1          | YPR046W                 | MCM16         |
| YOR132W                                          | VPS17         | YAR014C                 | BUD14         |
| YGR159C                                          | NSR1          | YKL041W                 | VPS24         |
| YBR057C                                          | MUM2          | YKL139W                 | CTK1          |
| YLR452C                                          | SST2          | YML071C                 | COG8          |
| YLR386W                                          | VAC14         | YLR180W                 | SAM1          |

| Predictions at threshold level 0.80 continued... |               |                         |               |
|--------------------------------------------------|---------------|-------------------------|---------------|
| Gene1 of predicted pair                          |               | Gene2 of predicted pair |               |
| Systematic Name                                  | Standard Name | Systematic Name         | Standard Name |
| YOR035C                                          | SHE4          | YOL081W                 | IRA2          |
| YDR320C                                          | SWA2          | YPR051W                 | MAK3          |
| YDL080C                                          | THI3          | YLR337C                 | VRP1          |
| YKL139W                                          | CTK1          | YML115C                 | VAN1          |
| YBR042C                                          | CST26         | YOR080W                 | DIA2          |
| YMR109W                                          | MYO5          | YHL002W                 | HSE1          |
| YKL032C                                          | IXR1          | YKL101W                 | HSL1          |
| YGL115W                                          | SNF4          | YPR046W                 | MCM16         |
| YBR171W                                          | SEC66         | YAL002W                 | VPS8          |
| YPR051W                                          | MAK3          | YML071C                 | COG8          |
| YDR137W                                          | RGP1          | YLR398C                 | SKI2          |
| YDR293C                                          | SSD1          | YHL031C                 | GOS1          |
| YML001W                                          | YPT7          | YMR214W                 | SCJ1          |
| YKL032C                                          | IXR1          | YDR076W                 | RAD55         |
| YFR010W                                          | UBP6          | YMR133W                 | REC114        |
| YIL053W                                          | RHR2          | YBR200W                 | BEM1          |
| YOR332W                                          | VMA4          | YMR054W                 | STV1          |
| YPL024W                                          | RMI1          | YCR031C                 | RPS14A        |
| YGL078C                                          | DBP3          | YER116C                 | SLX8          |
| YMR133W                                          | REC114        | YNL041C                 | COG6          |
| YLL007C                                          | YLL007C       | YEL053C                 | MAK10         |
| YJL176C                                          | SWI3          | YLR357W                 | RSC2          |
| YGL066W                                          | SGF73         | YNL229C                 | URE2          |
| YLR150W                                          | STM1          | YBR107C                 | IML3          |
| YJL154C                                          | VPS35         | YDL006W                 | PTC1          |
| YHR161C                                          | YAP1801       | YPL045W                 | VPS16         |
| YBL008W                                          | HIR1          | YDL047W                 | SIT4          |
| YLR320W                                          | MMS22         | YDL077C                 | VAM6          |
| YLR234W                                          | TOP3          | YAR014C                 | BUD14         |

| Predictions at threshold level 0.80 continued... |               |                         |               |
|--------------------------------------------------|---------------|-------------------------|---------------|
| Gene1 of predicted pair                          |               | Gene2 of predicted pair |               |
| Systematic Name                                  | Standard Name | Systematic Name         | Standard Name |
| YBR270C                                          | BIT2          | YPR119W                 | CLB2          |
| YBL008W                                          | HIR1          | YBR089C-A               | NHP6B         |
| YBR073W                                          | RDH54         | YNL248C                 | RPA49         |
| YOR039W                                          | CKB2          | YKL048C                 | ELM1          |
| YHR200W                                          | RPN10         | YER122C                 | GLO3          |
| YDR080W                                          | VPS41         | YEL013W                 | VAC8          |
| YPL115C                                          | BEM3          | YOR358W                 | HAP5          |
| YDR477W                                          | SNF1          | YHR039C-A               | VMA10         |
| YLR102C                                          | APC9          | YDR379W                 | RGA2          |
| YGL153W                                          | PEX14         | YBL101C                 | ECM21         |
| YDR254W                                          | CHL4          | YDL047W                 | SIT4          |
| YMR319C                                          | FET4          | YPR149W                 | NCE102        |
| YKR020W                                          | VPS51         | YOR036W                 | PEP12         |
| YMR029C                                          | FAR8          | YPR119W                 | CLB2          |
| YLR360W                                          | VPS38         | YGR188C                 | BUB1          |
| YJR140C                                          | HIR3          | YDR310C                 | SUM1          |
| YJL136C                                          | RPS21B        | YBR084C-A               | RPL19A        |
| YMR198W                                          | CIK1          | YML016C                 | PPZ1          |
| YFR036W                                          | CDC26         | YPL018W                 | CTF19         |
| YDR378C                                          | LSM6          | YJR135C                 | MCM22         |
| YDL005C                                          | MED2          | YNL031C                 | HHT2          |
| YFR010W                                          | UBP6          | YJL172W                 | CPS1          |
| YKL010C                                          | UFD4          | YGL153W                 | PEX14         |
| YBR173C                                          | UMP1          | YLR371W                 | ROM2          |
| YDL116W                                          | NUP84         | YLR315W                 | NKP2          |
| YKL092C                                          | BUD2          | YGR152C                 | RSR1          |
| YEL056W                                          | HAT2          | YOL067C                 | RTG1          |
| YLR018C                                          | POM34         | YKL068W                 | NUP100        |
| YMR004W                                          | MVP1          | YPL234C                 | TFP3          |

| Predictions at threshold level 0.80 continued... |               |                         |               |
|--------------------------------------------------|---------------|-------------------------|---------------|
| Gene1 of predicted pair                          |               | Gene2 of predicted pair |               |
| Systematic Name                                  | Standard Name | Systematic Name         | Standard Name |
| YLR371W                                          | ROM2          | YPR046W                 | MCM16         |
| YGL033W                                          | HOP2          | YLR093C                 | NYV1          |
| YLR083C                                          | EMP70         | YGL223C                 | COG1          |
| YHR012W                                          | VPS29         | YDR183W                 | PLP1          |
| YNL325C                                          | FIG4          | YBR108W                 | YBR108W       |
| YPL213W                                          | LEA1          | YKL041W                 | VPS24         |
| YLR083C                                          | EMP70         | YGL212W                 | VAM7          |
| YDR153C                                          | ENT5          | YPR032W                 | SRO7          |
| YLL039C                                          | UBI4          | YGL153W                 | PEX14         |
| YLR337C                                          | VRP1          | YMR032W                 | HOF1          |
| YOL121C                                          | RPS19A        | YDR358W                 | GGA1          |
| YML058W                                          | SML1          | YKL139W                 | CTK1          |
| YAL051W                                          | OAF1          | YOR363C                 | PIP2          |
| YIL002C                                          | INP51         | YDR358W                 | GGA1          |
| YNL291C                                          | MID1          | YEL053C                 | MAK10         |
| YPL024W                                          | RMI1          | YLR381W                 | CTF3          |
| YML071C                                          | COG8          | YBR019C                 | GAL10         |
| YIL076W                                          | SEC28         | YNL058C                 | YNL058C       |
| YGR270W                                          | YTA7          | YPR046W                 | MCM16         |
| YER116C                                          | SLX8          | YLR441C                 | RPS1A         |
| YDL161W                                          | ENT1          | YKR020W                 | VPS51         |
| YLR371W                                          | ROM2          | YFR036W                 | CDC26         |
| YBR030W                                          | YBR030W       | YMR311C                 | GLC8          |
| YML095C                                          | RAD10         | YNL116W                 | DMA2          |
| YGL178W                                          | MPT5          | YNL236W                 | SIN4          |
| YBR107C                                          | IML3          | YGL115W                 | SNF4          |
| YNL215W                                          | IES2          | YOL054W                 | PSH1          |
| YKL139W                                          | CTK1          | YGL163C                 | RAD54         |
| YML095C                                          | RAD10         | YDR363W-A               | SEM1          |

| Predictions at threshold level 0.80 continued... |               |                         |               |
|--------------------------------------------------|---------------|-------------------------|---------------|
| Gene1 of predicted pair                          |               | Gene2 of predicted pair |               |
| Systematic Name                                  | Standard Name | Systematic Name         | Standard Name |
| YDR080W                                          | VPS41         | YNL127W                 | FAR11         |
| YEL043W                                          | YEL043W       | YNL051W                 | COG5          |
| YML001W                                          | YPT7          | YJL004C                 | SYS1          |
| YDR283C                                          | GCN2          | YKR026C                 | GCN3          |
| YDR129C                                          | SAC6          | YBR181C                 | RPS6B         |
| YHR156C                                          | LIN1          | YBR280C                 | SAF1          |
| YLR095C                                          | IOC2          | YER122C                 | GLO3          |
| YPL240C                                          | HSP82         | YHL050C                 | YHL050C       |
| YFR010W                                          | UBP6          | YIR005W                 | IST3          |
| YDR137W                                          | RGP1          | YKL041W                 | VPS24         |
| YML071C                                          | COG8          | YKL119C                 | VPH2          |
| YNL218W                                          | MGS1          | YBR082C                 | UBC4          |
| YHR178W                                          | STB5          | YBL051C                 | PIN4          |
| YPL234C                                          | TFP3          | YDL077C                 | VAM6          |
| YNL025C                                          | SSN8          | YPL248C                 | GAL4          |
| YBR131W                                          | CCZ1          | YML001W                 | YPT7          |
| YDR192C                                          | NUP42         | YDR076W                 | RAD55         |
| YMR224C                                          | MRE11         | YEL060C                 | PRB1          |
| YML001W                                          | YPT7          | YPL045W                 | VPS16         |
| YOR195W                                          | SLK19         | YGL031C                 | RPL24A        |
| YGL237C                                          | HAP2          | YBR171W                 | SEC66         |
| YER044C                                          | ERG28         | YPL137C                 | GIP3          |
| YHR111W                                          | UBA4          | YPR046W                 | MCM16         |
| YHR205W                                          | SCH9          | YEL036C                 | ANP1          |
| YJR135C                                          | MCM22         | YNL116W                 | DMA2          |
| YKL139W                                          | CTK1          | YOL081W                 | IRA2          |
| YBL102W                                          | SFT2          | YJL036W                 | SNX4          |
| YNL307C                                          | MCK1          | YLR398C                 | SKI2          |
| YMR116C                                          | ASC1          | YLR135W                 | SLX4          |

| Predictions at threshold level 0.80 continued... |               |                         |               |
|--------------------------------------------------|---------------|-------------------------|---------------|
| Gene1 of predicted pair                          |               | Gene2 of predicted pair |               |
| Systematic Name                                  | Standard Name | Systematic Name         | Standard Name |
| YPR032W                                          | SRO7          | YOL108C                 | INO4          |
| YOR069W                                          | VPS5          | YPL259C                 | APM1          |
| YOR127W                                          | RGA1          | YAL002W                 | VPS8          |
| YNL069C                                          | RPL16B        | YPL105C                 | YPL105C       |
| YMR095C                                          | SNO1          | YMR153W                 | NUP53         |
| YDR146C                                          | SWI5          | YER161C                 | SPT2          |
| YLR191W                                          | PEX13         | YDR142C                 | PEX7          |
| YKR024C                                          | DBP7          | YML057W                 | CMP2          |
| YBR200W                                          | BEM1          | YBL051C                 | PIN4          |
| YPL042C                                          | SSN3          | YPR046W                 | MCM16         |
| YER116C                                          | SLX8          | YDL059C                 | RAD59         |
| YER116C                                          | SLX8          | YDL155W                 | CLB3          |
| YNL087W                                          | TCB2          | YOR035C                 | SHE4          |
| YNL069C                                          | RPL16B        | YOL018C                 | TLG2          |
| YPR131C                                          | NAT3          | YMR224C                 | MRE11         |
| YBR194W                                          | SOY1          | YGR014W                 | MSB2          |
| YNL291C                                          | MID1          | YPL195W                 | APL5          |
| YGL212W                                          | VAM7          | YNL307C                 | MCK1          |
| YGL054C                                          | ERV14         | YML001W                 | YPT7          |
| YNL243W                                          | SLA2          | YLL021W                 | SPA2          |
| YMR224C                                          | MRE11         | YGR188C                 | BUB1          |
| YER110C                                          | KAP123        | YGL016W                 | KAP122        |
| YPR040W                                          | TIP41         | YKL048C                 | ELM1          |
| YGL163C                                          | RAD54         | YNL116W                 | DMA2          |
| YOR080W                                          | DIA2          | YPR120C                 | CLB5          |
| YJR056C                                          | YJR056C       | YJL183W                 | MNN11         |
| YBL051C                                          | PIN4          | YOR358W                 | HAP5          |
| YLR396C                                          | VPS33         | YMR231W                 | PEP5          |
| YDR004W                                          | RAD57         | YKR095W                 | MLP1          |

| Predictions at threshold level 0.80 continued... |               |                         |               |
|--------------------------------------------------|---------------|-------------------------|---------------|
| Gene1 of predicted pair                          |               | Gene2 of predicted pair |               |
| Systematic Name                                  | Standard Name | Systematic Name         | Standard Name |
| YDR383C                                          | NKP1          | YFR030W                 | MET10         |
| YDR484W                                          | VPS52         | YOR036W                 | PEP12         |
| YMR095C                                          | SNO1          | YBL025W                 | RRN10         |
| YAL020C                                          | ATS1          | YDR507C                 | GIN4          |
| YNL041C                                          | COG6          | YKR030W                 | GMH1          |
| YDR264C                                          | AKR1          | YKR048C                 | NAP1          |
| YDR245W                                          | MNN10         | YJL183W                 | MNN11         |
| YGL237C                                          | HAP2          | YGR188C                 | BUB1          |
| YLR018C                                          | POM34         | YIL148W                 | RPL40A        |
| YBR107C                                          | IML3          | YDR363W-A               | SEM1          |
| YHR134W                                          | WSS1          | YKL048C                 | ELM1          |
| YLR337C                                          | VRP1          | YER001W                 | MNN1          |
| YCR066W                                          | RAD18         | YJR060W                 | CBF1          |
| YGL066W                                          | SGF73         | YDR264C                 | AKR1          |
| YMR055C                                          | BUB2          | YOR038C                 | HIR2          |
| YHL020C                                          | OPI1          | YPL234C                 | TFP3          |
| YBR200W                                          | BEM1          | YAR014C                 | BUD14         |
| YBR289W                                          | SNF5          | YBR010W                 | HHT1          |
| YLR433C                                          | CNA1          | YIR009W                 | MSL1          |
| YMR055C                                          | BUB2          | YLR233C                 | EST1          |
| YDR422C                                          | SIP1          | YPL256C                 | CLN2          |
| YDR245W                                          | MNN10         | YOR368W                 | RAD17         |
| YNL243W                                          | SLA2          | YBR164C                 | ARL1          |
| YKL135C                                          | APL2          | YDL006W                 | PTC1          |
| YGL163C                                          | RAD54         | YGL151W                 | NUT1          |
| YNL041C                                          | COG6          | YBR280C                 | SAF1          |
| YGL115W                                          | SNF4          | YER027C                 | GAL83         |
| YPR167C                                          | MET16         | YLR093C                 | NYV1          |
| YOR035C                                          | SHE4          | YBR036C                 | CSG2          |



| Predictions at threshold level 0.80 continued... |               |                         |               |
|--------------------------------------------------|---------------|-------------------------|---------------|
| Gene1 of predicted pair                          |               | Gene2 of predicted pair |               |
| Systematic Name                                  | Standard Name | Systematic Name         | Standard Name |
| YJL124C                                          | LSM1          | YML088W                 | UFO1          |
| YDR289C                                          | RTT103        | YOL067C                 | RTG1          |
| YJL140W                                          | RPB4          | YNL107W                 | YAF9          |
| YDR129C                                          | SAC6          | YKL032C                 | IXR1          |
| YDR484W                                          | VPS52         | YFL023W                 | BUD27         |
| YMR055C                                          | BUB2          | YDL155W                 | CLB3          |
| YDL020C                                          | RPN4          | YHR111W                 | UBA4          |
| YDR202C                                          | RAV2          | YCR066W                 | RAD18         |
| YMR199W                                          | CLN1          | YML028W                 | TSA1          |
| YIR005W                                          | IST3          | YML112W                 | CTK3          |
| YCR081W                                          | SRB8          | YEL036C                 | ANP1          |
| YNL069C                                          | RPL16B        | YCR077C                 | PAT1          |
| YLR386W                                          | VAC14         | YMR153W                 | NUP53         |
| YOR112W                                          | CEX1          | YNL297C                 | MON2          |
| YHR167W                                          | THP2          | YLR182W                 | SWI6          |
| YGL200C                                          | EMP24         | YER118C                 | SHO1          |
| YIL053W                                          | RHR2          | YHR200W                 | RPN10         |
| YIL034C                                          | CAP2          | YPL161C                 | BEM4          |
| YPL057C                                          | SUR1          | YBL025W                 | RRN10         |
| YPR036W                                          | VMA13         | YNL238W                 | KEX2          |
| YBL047C                                          | EDE1          | YOR368W                 | RAD17         |
| YLR102C                                          | APC9          | YNL206C                 | RTT106        |
| YFR010W                                          | UBP6          | YLR320W                 | MMS22         |
| YOR080W                                          | DIA2          | YHR167W                 | THP2          |
| YJL172W                                          | CPS1          | YFR036W                 | CDC26         |
| YDR004W                                          | RAD57         | YGR188C                 | BUB1          |
| YPL024W                                          | RMI1          | YDR245W                 | MNN10         |
| YEL015W                                          | EDC3          | YJR140C                 | HIR3          |
| YPL180W                                          | TCO89         | YML097C                 | VPS9          |

| Predictions at threshold level 0.80 continued... |               |                         |               |
|--------------------------------------------------|---------------|-------------------------|---------------|
| Gene1 of predicted pair                          |               | Gene2 of predicted pair |               |
| Systematic Name                                  | Standard Name | Systematic Name         | Standard Name |
| YGL078C                                          | DBP3          | YJL095W                 | BCK1          |
| YPL042C                                          | SSN3          | YOR156C                 | NFI1          |
| YGR184C                                          | UBR1          | YBR107C                 | IML3          |
| YOR368W                                          | RAD17         | YBR036C                 | CSG2          |
| YLL007C                                          | YLL007C       | YKL048C                 | ELM1          |
| YPL024W                                          | RMI1          | YPL161C                 | BEM4          |
| YLR386W                                          | VAC14         | YDR310C                 | SUM1          |
| YKL139W                                          | CTK1          | YOR141C                 | ARP8          |
| YPL129W                                          | TAF14         | YNR023W                 | SNF12         |
| YMR004W                                          | MVP1          | YKR020W                 | VPS51         |
| YNL058C                                          | YNL058C       | YFR036W                 | CDC26         |
| YBR107C                                          | IML3          | YHR111W                 | UBA4          |
| YBR274W                                          | CHK1          | YGL163C                 | RAD54         |
| YOR270C                                          | VPH1          | YLR452C                 | SST2          |
| YPL253C                                          | VIK1          | YOL081W                 | IRA2          |
| YGL054C                                          | ERV14         | YDR207C                 | UME6          |
| YBL051C                                          | PIN4          | YPL253C                 | VIK1          |
| YGR020C                                          | VMA7          | YCL001W                 | RER1          |
| YPR018W                                          | RLF2          | YJR135C                 | MCM22         |
| YPL057C                                          | SUR1          | YGR071C                 | YGR071C       |
| YKR035W-A                                        | DID2          | YER122C                 | GLO3          |
| YPL024W                                          | RMI1          | YKL126W                 | YPK1          |
| YGR241C                                          | YAP1802       | YCR088W                 | ABP1          |
| YML038C                                          | YMD8          | YLR309C                 | IMH1          |
| YDR484W                                          | VPS52         | YBR019C                 | GAL10         |
| YDL101C                                          | DUN1          | YML095C                 | RAD10         |
| YDR144C                                          | MKC7          | YAR014C                 | BUD14         |
| YJR032W                                          | CPR7          | YNL107W                 | YAF9          |
| YPR017C                                          | DSS4          | YNL107W                 | YAF9          |

| Predictions at threshold level 0.80 continued... |               |                         |               |
|--------------------------------------------------|---------------|-------------------------|---------------|
| Gene1 of predicted pair                          |               | Gene2 of predicted pair |               |
| Systematic Name                                  | Standard Name | Systematic Name         | Standard Name |
| YHR205W                                          | SCH9          | YOR014W                 | RTS1          |
| YDL116W                                          | NUP84         | YPL246C                 | RBD2          |
| YBL047C                                          | EDE1          | YKL161C                 | YKL161C       |
| YGR261C                                          | APL6          | YPL105C                 | YPL105C       |
| YML071C                                          | COG8          | YNL107W                 | YAF9          |
| YCL037C                                          | SRO9          | YDR207C                 | UME6          |
| YPL001W                                          | HAT1          | YNL031C                 | HHT2          |
| YBR041W                                          | FAT1          | YPL161C                 | BEM4          |
| YOR071C                                          | THI71         | YPR149W                 | NCE102        |
| YNL288W                                          | CAF40         | YDR254W                 | CHL4          |
| YLR095C                                          | IOC2          | YGL147C                 | RPL9A         |
| YKR020W                                          | VPS51         | YPL213W                 | LEA1          |
| YNL032W                                          | SIW14         | YMR311C                 | GLC8          |
| YOR358W                                          | HAP5          | YDR318W                 | MCM21         |
| YGR249W                                          | MGA1          | YPL195W                 | APL5          |
| YBR274W                                          | CHK1          | YJR032W                 | CPR7          |
| YLR240W                                          | VPS34         | YCR088W                 | ABP1          |
| YJL106W                                          | IME2          | YJR094C                 | IME1          |
| YDR378C                                          | LSM6          | YMR038C                 | CCS1          |
| YGL223C                                          | COG1          | YDL006W                 | PTC1          |
| YOR080W                                          | DIA2          | YJR060W                 | CBF1          |
| YHR156C                                          | LIN1          | YLR180W                 | SAM1          |
| YLR386W                                          | VAC14         | YDR358W                 | GGA1          |
| YOR038C                                          | HIR2          | YGL148W                 | ARO2          |
| YGL033W                                          | HOP2          | YNL041C                 | COG6          |
| YER162C                                          | RAD4          | YER122C                 | GLO3          |
| YJL006C                                          | CTK2          | YNL116W                 | DMA2          |
| YOR080W                                          | DIA2          | YLR370C                 | ARC18         |
| YGR019W                                          | UGA1          | YBR108W                 | YBR108W       |

| Predictions at threshold level 0.80 continued... |               |                         |               |
|--------------------------------------------------|---------------|-------------------------|---------------|
| Gene1 of predicted pair                          |               | Gene2 of predicted pair |               |
| Systematic Name                                  | Standard Name | Systematic Name         | Standard Name |
| YHR081W                                          | LRP1          | YER122C                 | GLO3          |
| YOR005C                                          | DNL4          | YCR014C                 | POL4          |
| YNL087W                                          | TCB2          | YOR290C                 | SNF2          |
| YPR084W                                          | YPR084W       | YCL037C                 | SRO9          |
| YLR079W                                          | SIC1          | YML112W                 | CTK3          |
| YBL102W                                          | SFT2          | YAL002W                 | VPS8          |
| YDR129C                                          | SAC6          | YBR171W                 | SEC66         |
| YLR079W                                          | SIC1          | YMR179W                 | SPT21         |
| YNL206C                                          | RTT106        | YOR275C                 | RIM20         |
| YDL244W                                          | THI13         | YPL240C                 | HSP82         |
| YML095C                                          | RAD10         | YHR010W                 | RPL27A        |
| YLR090W                                          | XDJ1          | YBR030W                 | YBR030W       |
| YML115C                                          | VAN1          | YER040W                 | GLN3          |
| YLR360W                                          | VPS38         | YDR254W                 | CHL4          |
| YNL094W                                          | APP1          | YKR030W                 | GMH1          |
| YDR363W-A                                        | SEM1          | YAL002W                 | VPS8          |
| YBR131W                                          | CCZ1          | YPL089C                 | RLM1          |
| YKR061W                                          | KTR2          | YJR135C                 | MCM22         |
| YFR024C-A                                        | LSB3          | YKR030W                 | GMH1          |
| YPL024W                                          | RMI1          | YGL163C                 | RAD54         |
| YER019C-A                                        | SBH2          | YDL006W                 | PTC1          |
| YMR172W                                          | HOT1          | YOL067C                 | RTG1          |
| YJL176C                                          | SWI3          | YBL072C                 | RPS8A         |
| YMR179W                                          | SPT21         | YJR135C                 | MCM22         |
| YBR107C                                          | IML3          | YAL002W                 | VPS8          |
| YLR386W                                          | VAC14         | YAL002W                 | VPS8          |
| YGL147C                                          | RPL9A         | YER044C                 | ERG28         |
| YEL044W                                          | IES6          | YBL072C                 | RPS8A         |
| YNL058C                                          | YNL058C       | YER139C                 | YER139C       |

| Predictions at threshold level 0.80 continued... |               |                         |               |
|--------------------------------------------------|---------------|-------------------------|---------------|
| Gene1 of predicted pair                          |               | Gene2 of predicted pair |               |
| Systematic Name                                  | Standard Name | Systematic Name         | Standard Name |
| YPL022W                                          | RAD1          | YLR410W                 | VIP1          |
| YJR024C                                          | MDE1          | YJR059W                 | PTK2          |
| YGL078C                                          | DBP3          | YMR133W                 | REC114        |
| YLR320W                                          | MMS22         | YPR030W                 | CSR2          |
| YDR004W                                          | RAD57         | YJL124C                 | LSM1          |
| YMR224C                                          | MRE11         | YNL307C                 | MCK1          |
| YLR079W                                          | SIC1          | YDL047W                 | SIT4          |
| YBR217W                                          | ATG12         | YER122C                 | GLO3          |
| YNL166C                                          | BNI5          | YPL018W                 | CTF19         |
| YBR200W                                          | BEM1          | YMR230W                 | RPS10B        |
| YMR054W                                          | STV1          | YPL120W                 | VPS30         |
| YGL212W                                          | VAM7          | YER162C                 | RAD4          |
| YGR249W                                          | MGA1          | YDR477W                 | SNF1          |
| YDR477W                                          | SNF1          | YEL053C                 | MAK10         |
| YDR395W                                          | SXM1          | YBL079W                 | NUP170        |
| YGL161C                                          | YIP5          | YDR310C                 | SUM1          |
| YDR254W                                          | CHL4          | YOL067C                 | RTG1          |
| YBR131W                                          | CCZ1          | YDL192W                 | ARF1          |
| YMR202W                                          | ERG2          | YDR507C                 | GIN4          |
| YDR289C                                          | RTT103        | YDR155C                 | CPR1          |
| YLR090W                                          | XDJ1          | YBR217W                 | ATG12         |
| YNL116W                                          | DMA2          | YGL252C                 | RTG2          |
| YDR137W                                          | RGP1          | YEL013W                 | VAC8          |
| YGL135W                                          | RPL1B         | YLR360W                 | VPS38         |
| YLR410W                                          | VIP1          | YFR036W                 | CDC26         |
| YML115C                                          | VAN1          | YBR041W                 | FAT1          |
| YBR171W                                          | SEC66         | YEL053C                 | MAK10         |
| YGL060W                                          | YBP2          | YJL006C                 | CTK2          |
| YPL042C                                          | SSN3          | YJL089W                 | SIP4          |

| Predictions at threshold level 0.80 continued... |               |                         |               |
|--------------------------------------------------|---------------|-------------------------|---------------|
| Gene1 of predicted pair                          |               | Gene2 of predicted pair |               |
| Systematic Name                                  | Standard Name | Systematic Name         | Standard Name |
| YLR399C                                          | BDF1          | YOR141C                 | ARP8          |
| YGL250W                                          | RMR1          | YDR310C                 | SUM1          |
| YDL184C                                          | RPL41A        | YPR036W                 | VMA13         |
| YOR035C                                          | SHE4          | YBL072C                 | RPS8A         |
| YOR337W                                          | TEA1          | YDR261C                 | EXG2          |
| YGR105W                                          | VMA21         | YKL080W                 | VMA5          |
| YDL020C                                          | RPN4          | YIL008W                 | URM1          |
| YNL307C                                          | MCK1          | YGR135W                 | PRE9          |
| YBR200W                                          | BEM1          | YLR425W                 | TUS1          |
| YLR447C                                          | VMA6          | YPL234C                 | TFP3          |
| YDR309C                                          | GIC2          | YNL116W                 | DMA2          |
| YNL243W                                          | SLA2          | YNL020C                 | ARK1          |
| YGR072W                                          | UPF3          | YDR153C                 | ENT5          |
| YKL116C                                          | PRR1          | YER162C                 | RAD4          |
| YDL116W                                          | NUP84         | YKL117W                 | SBA1          |
| YEL009C                                          | GCN4          | YOR298C-A               | MBF1          |
| YOR127W                                          | RGA1          | YOL018C                 | TLG2          |
| YOR337W                                          | TEA1          | YLR370C                 | ARC18         |
| YLR370C                                          | ARC18         | YPR119W                 | CLB2          |
| YBR215W                                          | HPC2          | YDR440W                 | DOT1          |
| YPL045W                                          | VPS16         | YGL198W                 | YIP4          |
| YKR072C                                          | SIS2          | YOR080W                 | DIA2          |
| YGR108W                                          | CLB1          | YEL056W                 | HAT2          |
| YOR132W                                          | VPS17         | YJR058C                 | APS2          |
| YDR440W                                          | DOT1          | YDR155C                 | CPR1          |
| YOR358W                                          | HAP5          | YGL253W                 | HXK2          |
| YPR046W                                          | MCM16         | YOR035C                 | SHE4          |
| YDL116W                                          | NUP84         | YJL006C                 | CTK2          |
| YOR069W                                          | VPS5          | YDL006W                 | PTC1          |

| Predictions at threshold level 0.80 continued... |               |                         |               |
|--------------------------------------------------|---------------|-------------------------|---------------|
| Gene1 of predicted pair                          |               | Gene2 of predicted pair |               |
| Systematic Name                                  | Standard Name | Systematic Name         | Standard Name |
| YGL223C                                          | COG1          | YML001W                 | YPT7          |
| YBR217W                                          | ATG12         | YPL137C                 | GIP3          |
| YPL057C                                          | SUR1          | YHR013C                 | ARD1          |
| YNL199C                                          | GCR2          | YKL068W                 | NUP100        |
| YGR217W                                          | CCH1          | YGR135W                 | PRE9          |
| YFR010W                                          | UBP6          | YNL117W                 | MLS1          |
| YPL042C                                          | SSN3          | YDR289C                 | RTT103        |
| YGR270W                                          | YTA7          | YHR115C                 | DMA1          |
| YOR270C                                          | VPH1          | YDL192W                 | ARF1          |
| YFL023W                                          | BUD27         | YPR036W                 | VMA13         |
| YGL241W                                          | KAP114        | YBR010W                 | HHT1          |
| YKL101W                                          | HSL1          | YGR188C                 | BUB1          |
| YBL087C                                          | RPL23A        | YHR115C                 | DMA1          |
| YAR014C                                          | BUD14         | YER122C                 | GLO3          |
| YPL161C                                          | BEM4          | YDR289C                 | RTT103        |
| YNL259C                                          | ATX1          | YDR270W                 | CCC2          |
| YML095C                                          | RAD10         | YJR090C                 | GRR1          |
| YOR001W                                          | RRP6          | YGL174W                 | BUD13         |
| YPL253C                                          | VIK1          | YPL018W                 | CTF19         |
| YBR217W                                          | ATG12         | YNL076W                 | MKS1          |
| YER110C                                          | KAP123        | YPR051W                 | MAK3          |
| YMR055C                                          | BUB2          | YOR043W                 | WHI2          |
| YMR224C                                          | MRE11         | YHR013C                 | ARD1          |
| YBL058W                                          | SHP1          | YER162C                 | RAD4          |
| YCR065W                                          | HCM1          | YGL031C                 | RPL24A        |
| YBR108W                                          | YBR108W       | YOL111C                 | MDY2          |
| YER120W                                          | SCS2          | YDR310C                 | SUM1          |
| YLR320W                                          | MMS22         | YHR039C-A               | VMA10         |
| YGR135W                                          | PRE9          | YDR318W                 | MCM21         |

| Predictions at threshold level 0.80 continued... |               |                         |               |
|--------------------------------------------------|---------------|-------------------------|---------------|
| Gene1 of predicted pair                          |               | Gene2 of predicted pair |               |
| Systematic Name                                  | Standard Name | Systematic Name         | Standard Name |
| YML001W                                          | YPT7          | YNL107W                 | YAF9          |
| YIL076W                                          | SEC28         | YLR441C                 | RPS1A         |
| YLR337C                                          | VRP1          | YLR234W                 | TOP3          |
| YBR228W                                          | SLX1          | YCL037C                 | SRO9          |
| YGR249W                                          | MGA1          | YER139C                 | YER139C       |
| YOR033C                                          | EXO1          | YGL175C                 | SAE2          |
| YIL053W                                          | RHR2          | YMR133W                 | REC114        |
| YNL307C                                          | MCK1          | YFR030W                 | MET10         |
| YCR086W                                          | CSM1          | YBR036C                 | CSG2          |
| YLR337C                                          | VRP1          | YBR114W                 | RAD16         |
| YPL057C                                          | SUR1          | YOR038C                 | HIR2          |
| YML115C                                          | VAN1          | YOL081W                 | IRA2          |
| YGL095C                                          | VPS45         | YAL030W                 | SNC1          |
| YBR057C                                          | MUM2          | YLR032W                 | RAD5          |
| YJL187C                                          | SWE1          | YDR207C                 | UME6          |
| YGR072W                                          | UPF3          | YLR135W                 | SLX4          |
| YGR270W                                          | YTA7          | YCR077C                 | PAT1          |
| YOR127W                                          | RGA1          | YMR054W                 | STV1          |
| YDR080W                                          | VPS41         | YJR033C                 | RAV1          |
| YIL159W                                          | BNR1          | YJR056C                 | YJR056C       |
| YGL078C                                          | DBP3          | YJR056C                 | YJR056C       |
| YOR145C                                          | PNO1          | YOR078W                 | BUD21         |
| YKR001C                                          | VPS1          | YOR368W                 | RAD17         |
| YDL116W                                          | NUP84         | YDR156W                 | RPA14         |
| YLR399C                                          | BDF1          | YNL248C                 | RPA49         |
| YML103C                                          | NUP188        | YKL110C                 | KTI12         |
| YMR198W                                          | CIK1          | YAL002W                 | VPS8          |
| YPR101W                                          | SNT309        | YJR050W                 | ISY1          |
| YKR072C                                          | SIS2          | YMR038C                 | CCS1          |



| Predictions at threshold level 0.80 continued... |               |                         |               |
|--------------------------------------------------|---------------|-------------------------|---------------|
| Gene1 of predicted pair                          |               | Gene2 of predicted pair |               |
| Systematic Name                                  | Standard Name | Systematic Name         | Standard Name |
| YDR225W                                          | HTA1          | YMR153W                 | NUP53         |
| YLR234W                                          | TOP3          | YML016C                 | PPZ1          |
| YIL008W                                          | URM1          | YGL163C                 | RAD54         |
| YOR069W                                          | VPS5          | YDR310C                 | SUM1          |
| YNL291C                                          | MID1          | YPL161C                 | BEM4          |
| YMR224C                                          | MRE11         | YKR001C                 | VPS1          |
| YLR452C                                          | SST2          | YER122C                 | GLO3          |
| YDR176W                                          | NGG1          | YBL005W                 | PDR3          |
| YGL147C                                          | RPL9A         | YDL083C                 | RPS16B        |
| YFR010W                                          | UBP6          | YBR200W                 | BEM1          |
| YBL019W                                          | APN2          | YMR055C                 | BUB2          |
| YGR261C                                          | APL6          | YER162C                 | RAD4          |
| YDR484W                                          | VPS52         | YJR084W                 | CSN12         |
| YDR097C                                          | MSH6          | YGL100W                 | SEH1          |
| YMR224C                                          | MRE11         | YMR116C                 | ASC1          |
| YBR030W                                          | YBR030W       | YJR084W                 | CSN12         |
| YNL329C                                          | PEX6          | YKL041W                 | VPS24         |
| YPL105C                                          | YPL105C       | YKR030W                 | GMH1          |
| YGR261C                                          | APL6          | YLR309C                 | IMH1          |
| YDR335W                                          | MSN5          | YMR055C                 | BUB2          |
| YAL020C                                          | ATS1          | YKL048C                 | ELM1          |
| YJL154C                                          | VPS35         | YIL008W                 | URM1          |
| YLR094C                                          | GIS3          | YJL095W                 | BCK1          |
| YDR202C                                          | RAV2          | YDL192W                 | ARF1          |
| YPL105C                                          | YPL105C       | YKR020W                 | VPS51         |
| YKL139W                                          | CTK1          | YDR310C                 | SUM1          |
| YKR072C                                          | SIS2          | YHR010W                 | RPL27A        |
| YNL016W                                          | PUB1          | YMR038C                 | CCS1          |
| YNL025C                                          | SSN8          | YNL236W                 | SIN4          |

| Predictions at threshold level 0.80 continued... |               |                         |               |
|--------------------------------------------------|---------------|-------------------------|---------------|
| Gene1 of predicted pair                          |               | Gene2 of predicted pair |               |
| Systematic Name                                  | Standard Name | Systematic Name         | Standard Name |
| YKL032C                                          | IXR1          | YDR310C                 | SUM1          |
| YFL023W                                          | BUD27         | YGL124C                 | MON1          |
| YGR129W                                          | SYF2          | YKL074C                 | MUD2          |
| YKL007W                                          | CAP1          | YLR216C                 | CPR6          |
| YNL248C                                          | RPA49         | YDR289C                 | RTT103        |
| YGL253W                                          | HXK2          | YAL002W                 | VPS8          |
| YDR477W                                          | SNF1          | YDR456W                 | NHX1          |
| YPL050C                                          | MNN9          | YNL041C                 | COG6          |
| YJR135C                                          | MCM22         | YOR014W                 | RTS1          |
| YGR072W                                          | UPF3          | YBL102W                 | SFT2          |
| YOR069W                                          | VPS5          | YCR066W                 | RAD18         |
| YMR142C                                          | RPL13B        | YHR081W                 | LRP1          |
| YJL124C                                          | LSM1          | YDR289C                 | RTT103        |
| YNL135C                                          | FPR1          | YBL103C                 | RTG3          |
| YOR156C                                          | NFI1          | YPL057C                 | SUR1          |
| YML095C                                          | RAD10         | YGL031C                 | RPL24A        |
| YMR153W                                          | NUP53         | YBL103C                 | RTG3          |
| YNL307C                                          | MCK1          | YJL095W                 | BCK1          |
| YBL102W                                          | SFT2          | YDR207C                 | UME6          |
| YLR234W                                          | TOP3          | YGL019W                 | CKB1          |
| YPL246C                                          | RBD2          | YHR016C                 | YSC84         |
| YLR399C                                          | BDF1          | YNL107W                 | YAF9          |
| YNL215W                                          | IES2          | YGL163C                 | RAD54         |
| YCR034W                                          | FEN1          | YML016C                 | PPZ1          |
| YBR173C                                          | UMP1          | YHR081W                 | LRP1          |
| YPL050C                                          | MNN9          | YMR109W                 | MYO5          |
| YML071C                                          | COG8          | YER139C                 | YER139C       |
| YDR165W                                          | TRM82         | YDL201W                 | TRM8          |
| YGL135W                                          | RPL1B         | YML115C                 | VAN1          |

| Predictions at threshold level 0.80 continued... |               |                         |               |
|--------------------------------------------------|---------------|-------------------------|---------------|
| Gene1 of predicted pair                          |               | Gene2 of predicted pair |               |
| Systematic Name                                  | Standard Name | Systematic Name         | Standard Name |
| YHR060W                                          | VMA22         | YPL234C                 | TFP3          |
| YDR137W                                          | RGP1          | YOR124C                 | UBP2          |
| YMR224C                                          | MRE11         | YLR288C                 | MEC3          |
| YKL025C                                          | PAN3          | YEL053C                 | MAK10         |
| YGR072W                                          | UPF3          | YOR327C                 | SNC2          |
| YKR099W                                          | BAS1          | YKL048C                 | ELM1          |
| YLR192C                                          | HCR1          | YCR053W                 | THR4          |
| YCR020C-A                                        | MAK31         | YMR054W                 | STV1          |
| YER162C                                          | RAD4          | YLR180W                 | SAM1          |
| YJR135C                                          | MCM22         | YHR114W                 | BZZ1          |
| YLR119W                                          | SRN2          | YNL032W                 | SIW14         |
| YDR309C                                          | GIC2          | YDR227W                 | SIR4          |
| YLR083C                                          | EMP70         | YER122C                 | GLO3          |
| YMR142C                                          | RPL13B        | YDL077C                 | VAM6          |
| YPL240C                                          | HSP82         | YJL103C                 | GSM1          |
| YBL087C                                          | RPL23A        | YNL116W                 | DMA2          |
| YJR140C                                          | HIR3          | YCR077C                 | PAT1          |
| YKL130C                                          | SHE2          | YKL185W                 | ASH1          |
| YDL213C                                          | NOP6          | YOR078W                 | BUD21         |
| YBR200W                                          | BEM1          | YMR109W                 | MYO5          |
| YML016C                                          | PPZ1          | YPL256C                 | CLN2          |
| YKL048C                                          | ELM1          | YHR060W                 | VMA22         |
| YDR155C                                          | CPR1          | YPL018W                 | CTF19         |
| YPL129W                                          | TAF14         | YLR176C                 | RFX1          |
| YDR320C                                          | SWA2          | YDL226C                 | GCS1          |
| YLR095C                                          | IOC2          | YOR270C                 | VPH1          |
| YGR270W                                          | YTA7          | YKL160W                 | ELF1          |
| YIL159W                                          | BNR1          | YEL053C                 | MAK10         |
| YJR059W                                          | PTK2          | YMR164C                 | MSS11         |

| Predictions at threshold level 0.80 continued... |               |                         |               |
|--------------------------------------------------|---------------|-------------------------|---------------|
| Gene1 of predicted pair                          |               | Gene2 of predicted pair |               |
| Systematic Name                                  | Standard Name | Systematic Name         | Standard Name |
| YLR386W                                          | VAC14         | YKR035W-A               | DID2          |
| YDR080W                                          | VPS41         | YGR105W                 | VMA21         |
| YGL054C                                          | ERV14         | YGR105W                 | VMA21         |
| YDR260C                                          | SWM1          | YPL018W                 | CTF19         |
| YBL007C                                          | SLA1          | YGL095C                 | VPS45         |
| YML095C                                          | RAD10         | YLR352W                 | YLR352W       |
| YBR200W                                          | BEM1          | YBR171W                 | SEC66         |
| YGL087C                                          | MMS2          | YNL166C                 | BNI5          |
| YFL023W                                          | BUD27         | YPL137C                 | GIP3          |
| YLR313C                                          | SPH1          | YBR082C                 | UBC4          |
| YBR138C                                          | YBR138C       | YGR223C                 | HSV2          |
| YKR048C                                          | NAP1          | YLR425W                 | TUS1          |
| YCR077C                                          | PAT1          | YGR152C                 | RSR1          |
| YBR127C                                          | VMA2          | YMR054W                 | STV1          |
| YPL256C                                          | CLN2          | YKL101W                 | HSL1          |
| YAL024C                                          | LTE1          | YHR200W                 | RPN10         |
| YOR290C                                          | SNF2          | YML071C                 | COG8          |
| YMR133W                                          | REC114        | YBL025W                 | RRN10         |
| YJR135C                                          | MCM22         | YDR289C                 | RTT103        |
| YNL032W                                          | SIW14         | YHR200W                 | RPN10         |
| YBR215W                                          | HPC2          | YCR086W                 | CSM1          |
| YPR018W                                          | RLF2          | YMR038C                 | CCS1          |
| YDR202C                                          | RAV2          | YDR207C                 | UME6          |
| YER162C                                          | RAD4          | YLR093C                 | NYV1          |
| YGL223C                                          | COG1          | YEL036C                 | ANP1          |
| YHR013C                                          | ARD1          | YAR014C                 | BUD14         |
| YKL126W                                          | YPK1          | YOL121C                 | RPS19A        |
| YNL307C                                          | MCK1          | YEL053C                 | MAK10         |
| YAL024C                                          | LTE1          | YOL111C                 | MDY2          |

| Predictions at threshold level 0.80 continued... |               |                         |               |
|--------------------------------------------------|---------------|-------------------------|---------------|
| Gene1 of predicted pair                          |               | Gene2 of predicted pair |               |
| Systematic Name                                  | Standard Name | Systematic Name         | Standard Name |
| YGL087C                                          | MMS2          | YAR014C                 | BUD14         |
| YLR386W                                          | VAC14         | YNL076W                 | MKS1          |
| YGL066W                                          | SGF73         | YDR254W                 | CHL4          |
| YGL115W                                          | SNF4          | YHR081W                 | LRP1          |
| YLR386W                                          | VAC14         | YDR261C                 | EXG2          |
| YDR358W                                          | GGA1          | YOR035C                 | SHE4          |
| YEL053C                                          | MAK10         | YLR309C                 | IMH1          |
| YLR090W                                          | XDJ1          | YDR358W                 | GGA1          |
| YDR320C                                          | SWA2          | YML038C                 | YMD8          |
| YHR134W                                          | WSS1          | YOR080W                 | DIA2          |
| YNL004W                                          | HRB1          | YCL011C                 | GBP2          |
| YDR363W-A                                        | SEM1          | YJR035W                 | RAD26         |
| YBR107C                                          | IML3          | YDL155W                 | CLB3          |
| YLR090W                                          | XDJ1          | YDR137W                 | RGP1          |
| YOR368W                                          | RAD17         | YKL114C                 | APN1          |
| YDR004W                                          | RAD57         | YBR195C                 | MSI1          |
| YKL025C                                          | PAN3          | YIL034C                 | CAP2          |
| YJR135C                                          | MCM22         | YGR135W                 | PRE9          |
| YPR051W                                          | MAK3          | YJR135C                 | MCM22         |
| YOR069W                                          | VPS5          | YOR106W                 | VAM3          |
| YOR195W                                          | SLK19         | YJR005W                 | APL1          |
| YOL111C                                          | MDY2          | YJR084W                 | CSN12         |
| YGL237C                                          | HAP2          | YJL190C                 | RPS22A        |
| YJR140C                                          | HIR3          | YMR055C                 | BUB2          |
| YNL206C                                          | RTT106        | YOR141C                 | ARP8          |
| YKL160W                                          | ELF1          | YHR167W                 | THP2          |
| YER116C                                          | SLX8          | YAL009W                 | SPO7          |
| YJL036W                                          | SNX4          | YPR119W                 | CLB2          |
| YGL161C                                          | YIP5          | YNL107W                 | YAF9          |

| Predictions at threshold level 0.80 continued... |               |                         |               |
|--------------------------------------------------|---------------|-------------------------|---------------|
| Gene1 of predicted pair                          |               | Gene2 of predicted pair |               |
| Systematic Name                                  | Standard Name | Systematic Name         | Standard Name |
| YGL033W                                          | HOP2          | YER040W                 | GLN3          |
| YEL053C                                          | MAK10         | YJL004C                 | SYS1          |
| YHR152W                                          | SPO12         | YDL047W                 | SIT4          |
| YGR239C                                          | PEX21         | YGL153W                 | PEX14         |
| YDR293C                                          | SSD1          | YPR120C                 | CLB5          |
| YOR337W                                          | TEA1          | YHR039C-A               | VMA10         |
| YHR200W                                          | RPN10         | YPL137C                 | GIP3          |
| YLR452C                                          | SST2          | YPR046W                 | MCM16         |
| YBL051C                                          | PIN4          | YML016C                 | PPZ1          |
| YLR192C                                          | HCR1          | YLR441C                 | RPS1A         |
| YGL066W                                          | SGF73         | YDR379W                 | RGA2          |
| YIL053W                                          | RHR2          | YMR230W                 | RPS10B        |
| YMR116C                                          | ASC1          | YBL079W                 | NUP170        |
| YPR084W                                          | YPR084W       | YPL057C                 | SUR1          |
| YMR127C                                          | SAS2          | YDR183W                 | PLP1          |
| YLR095C                                          | IOC2          | YNL307C                 | MCK1          |
| YMR224C                                          | MRE11         | YEL053C                 | MAK10         |
| YPL024W                                          | RMI1          | YPL001W                 | HAT1          |
| YOR106W                                          | VAM3          | YDL006W                 | PTC1          |
| YHL031C                                          | GOS1          | YDR080W                 | VPS41         |
| YOR270C                                          | VPH1          | YML071C                 | COG8          |
| YDR260C                                          | SWM1          | YKL101W                 | HSL1          |
| YGR133W                                          | PEX4          | YML071C                 | COG8          |
| YGL151W                                          | NUT1          | YAL002W                 | VPS8          |
| YLR119W                                          | SRN2          | YEL060C                 | PRB1          |
| YGL147C                                          | RPL9A         | YBR171W                 | SEC66         |
| YDR293C                                          | SSD1          | YNL238W                 | KEX2          |
| YPL137C                                          | GIP3          | YDR207C                 | UME6          |
| YIL034C                                          | CAP2          | YAL002W                 | VPS8          |

| Predictions at threshold level 0.80 continued... |               |                         |               |
|--------------------------------------------------|---------------|-------------------------|---------------|
| Gene1 of predicted pair                          |               | Gene2 of predicted pair |               |
| Systematic Name                                  | Standard Name | Systematic Name         | Standard Name |
| YFR036W                                          | CDC26         | YER122C                 | GLO3          |
| YGL087C                                          | MMS2          | YMR109W                 | MYO5          |
| YCL037C                                          | SRO9          | YNR032W                 | PPG1          |
| YBR127C                                          | VMA2          | YEL027W                 | CUP5          |
| YLR386W                                          | VAC14         | YOR023C                 | AHC1          |
| YGR108W                                          | CLB1          | YDR363W-A               | SEM1          |
| YNL054W                                          | VAC7          | YHR115C                 | DMA1          |
| YHR200W                                          | RPN10         | YJR084W                 | CSN12         |
| YML001W                                          | YPT7          | YHR012W                 | VPS29         |
| YGL124C                                          | MON1          | YGR188C                 | BUB1          |
| YLL042C                                          | ATG10         | YPL149W                 | ATG5          |
| YBL047C                                          | EDE1          | YDL047W                 | SIT4          |
| YBR260C                                          | RGD1          | YOR014W                 | RTS1          |
| YLR192C                                          | HCR1          | YKL139W                 | CTK1          |
| YIR009W                                          | MSL1          | YGR188C                 | BUB1          |
| YKR057W                                          | RPS21A        | YBL087C                 | RPL23A        |
| YNL243W                                          | SLA2          | YMR294W                 | JNM1          |
| YNL288W                                          | CAF40         | YIL008W                 | URM1          |
| YCR086W                                          | CSM1          | YDR289C                 | RTT103        |
| YLR102C                                          | APC9          | YKR048C                 | NAP1          |
| YPL120W                                          | VPS30         | YKR030W                 | GMH1          |
| YJR032W                                          | CPR7          | YGR188C                 | BUB1          |
| YKL181W                                          | PRS1          | YPR119W                 | CLB2          |
| YDR225W                                          | HTA1          | YGL163C                 | RAD54         |
| YPR135W                                          | CTF4          | YBR089C-A               | NHP6B         |
| YEL044W                                          | IES6          | YGL212W                 | VAM7          |
| YFR010W                                          | UBP6          | YDR076W                 | RAD55         |
| YNL297C                                          | MON2          | YAL002W                 | VPS8          |
| YLR360W                                          | VPS38         | YER120W                 | SCS2          |

| Predictions at threshold level 0.80 continued... |               |                         |               |
|--------------------------------------------------|---------------|-------------------------|---------------|
| Gene1 of predicted pair                          |               | Gene2 of predicted pair |               |
| Systematic Name                                  | Standard Name | Systematic Name         | Standard Name |
| YNL058C                                          | YNL058C       | YER040W                 | GLN3          |
| YIL053W                                          | RHR2          | YLR320W                 | MMS22         |
| YMR026C                                          | PEX12         | YOR270C                 | VPH1          |
| YGL087C                                          | MMS2          | YDR310C                 | SUM1          |
| YOR106W                                          | VAM3          | YHR039C-A               | VMA10         |
| YLR150W                                          | STM1          | YHR013C                 | ARD1          |
| YPL022W                                          | RAD1          | YDR318W                 | MCM21         |
| YLR095C                                          | IOC2          | YDL223C                 | HBT1          |
| YPL195W                                          | APL5          | YCR053W                 | THR4          |
| YIR005W                                          | IST3          | YPR046W                 | MCM16         |
| YJL036W                                          | SNX4          | YAL030W                 | SNC1          |
| YPL042C                                          | SSN3          | YOL091W                 | SPO21         |
| YMR109W                                          | MYO5          | YKL213C                 | DOA1          |
| YDR092W                                          | UBC13         | YLR032W                 | RAD5          |
| YMR153W                                          | NUP53         | YNL238W                 | KEX2          |
| YKL161C                                          | YKL161C       | YLR425W                 | TUS1          |
| YJL124C                                          | LSM1          | YOR312C                 | RPL20B        |
| YER001W                                          | MNN1          | YKL041W                 | VPS24         |
| YIL159W                                          | BNR1          | YMR026C                 | PEX12         |
| YDR379W                                          | RGA2          | YBL087C                 | RPL23A        |
| YLR119W                                          | SRN2          | YPL037C                 | EGD1          |
| YCR020C-A                                        | MAK31         | YPL161C                 | BEM4          |
| YMR273C                                          | ZDS1          | YHR061C                 | GIC1          |
| YFR036W                                          | CDC26         | YOR327C                 | SNC2          |
| YGL153W                                          | PEX14         | YGL200C                 | EMP24         |
| YCL037C                                          | SRO9          | YEL051W                 | VMA8          |
| YBL047C                                          | EDE1          | YLR182W                 | SWI6          |
| YMR153W                                          | NUP53         | YNL076W                 | MKS1          |
| YPL234C                                          | TFP3          | YOR327C                 | SNC2          |



| Predictions at threshold level 0.80 continued... |               |                         |               |
|--------------------------------------------------|---------------|-------------------------|---------------|
| Gene1 of predicted pair                          |               | Gene2 of predicted pair |               |
| Systematic Name                                  | Standard Name | Systematic Name         | Standard Name |
| YDL184C                                          | RPL41A        | YPR046W                 | MCM16         |
| YHR178W                                          | STB5          | YOR038C                 | HIR2          |
| YGL163C                                          | RAD54         | YDR076W                 | RAD55         |
| YKR048C                                          | NAP1          | YNL116W                 | DMA2          |
| YAL024C                                          | LTE1          | YOR368W                 | RAD17         |
| YBR030W                                          | YBR030W       | YOR327C                 | SNC2          |
| YGR159C                                          | NSR1          | YGL200C                 | EMP24         |
| YNL031C                                          | HHT2          | YDR071C                 | PAA1          |
| YBL103C                                          | RTG3          | YNL058C                 | YNL058C       |
| YPL161C                                          | BEM4          | YBL087C                 | RPL23A        |
| YER116C                                          | SLX8          | YKR035W-A               | DID2          |
| YPR017C                                          | DSS4          | YEL051W                 | VMA8          |
| YAL024C                                          | LTE1          | YEL060C                 | PRB1          |
| YDR144C                                          | MKC7          | YBR114W                 | RAD16         |
| YER087C-B                                        | SBH1          | YBR279W                 | PAF1          |
| YER044C                                          | ERG28         | YMR311C                 | GLC8          |
| YBR107C                                          | IML3          | YOL081W                 | IRA2          |
| YGL124C                                          | MON1          | YEL060C                 | PRB1          |
| YAL024C                                          | LTE1          | YKL048C                 | ELM1          |
| YPL037C                                          | EGD1          | YNR072W                 | HXT17         |
| YNL243W                                          | SLA2          | YPL024W                 | RMI1          |
| YDR123C                                          | INO2          | YPL248C                 | GAL4          |
| YAL024C                                          | LTE1          | YJR063W                 | RPA12         |
| YBL008W                                          | HIR1          | YDR378C                 | LSM6          |
| YPL050C                                          | MNN9          | YNL079C                 | TPM1          |
| YDR142C                                          | PEX7          | YDL065C                 | PEX19         |
| YLR095C                                          | IOC2          | YDR207C                 | UME6          |
| YGL175C                                          | SAE2          | YJR035W                 | RAD26         |
| YER110C                                          | KAP123        | YGL124C                 | MON1          |

| Predictions at threshold level 0.80 continued... |               |                         |               |
|--------------------------------------------------|---------------|-------------------------|---------------|
| Gene1 of predicted pair                          |               | Gene2 of predicted pair |               |
| Systematic Name                                  | Standard Name | Systematic Name         | Standard Name |
| YKL139W                                          | CTK1          | YLR320W                 | MMS22         |
| YJR035W                                          | RAD26         | YNL107W                 | YAF9          |
| YOR112W                                          | CEX1          | YOL018C                 | TLG2          |
| YKL025C                                          | PAN3          | YOR132W                 | VPS17         |
| YLR119W                                          | SRN2          | YJR032W                 | CPR7          |
| YAL024C                                          | LTE1          | YPL195W                 | APL5          |
| YBR278W                                          | DPB3          | YOR038C                 | HIR2          |
| YDR244W                                          | PEX5          | YOL044W                 | PEX15         |
| YIL034C                                          | CAP2          | YHL002W                 | HSE1          |
| YBR171W                                          | SEC66         | YDR207C                 | UME6          |
| YCL010C                                          | SGF29         | YGR252W                 | GCN5          |
| YMR055C                                          | BUB2          | YDR183W                 | PLP1          |
| YNR072W                                          | HXT17         | YDR358W                 | GGA1          |
| YGR249W                                          | MGA1          | YCR053W                 | THR4          |
| YPL022W                                          | RAD1          | YGL031C                 | RPL24A        |
| YDR440W                                          | DOT1          | YKL041W                 | VPS24         |
| YDL155W                                          | CLB3          | YLR131C                 | ACE2          |
| YHR161C                                          | YAP1801       | YOR327C                 | SNC2          |
| YPL256C                                          | CLN2          | YNL116W                 | DMA2          |
| YPL042C                                          | SSN3          | YDR318W                 | MCM21         |
| YDR289C                                          | RTT103        | YOR368W                 | RAD17         |
| YDL116W                                          | NUP84         | YML112W                 | CTK3          |
| YBR200W                                          | BEM1          | YMR032W                 | HOF1          |
| YDR254W                                          | CHL4          | YLR032W                 | RAD5          |
| YJR084W                                          | CSN12         | YOR368W                 | RAD17         |
| YDL116W                                          | NUP84         | YPL178W                 | CBC2          |
| YPL161C                                          | BEM4          | YHL002W                 | HSE1          |
| YGR105W                                          | VMA21         | YAL002W                 | VPS8          |
| YDR101C                                          | ARX1          | YKL068W                 | NUP100        |

| Predictions at threshold level 0.80 continued... |               |                         |               |
|--------------------------------------------------|---------------|-------------------------|---------------|
| Gene1 of predicted pair                          |               | Gene2 of predicted pair |               |
| Systematic Name                                  | Standard Name | Systematic Name         | Standard Name |
| YDL160C                                          | DHH1          | YML095C                 | RAD10         |
| YPL018W                                          | CTF19         | YJR035W                 | RAD26         |
| YIL008W                                          | URM1          | YPL018W                 | CTF19         |
| YBR171W                                          | SEC66         | YGR188C                 | BUB1          |
| YBR215W                                          | HPC2          | YDR200C                 | VPS64         |
| YPR017C                                          | DSS4          | YOL018C                 | TLG2          |
| YDR105C                                          | TMS1          | YFL044C                 | OTU1          |
| YKL048C                                          | ELM1          | YJL157C                 | FAR1          |
| YPL115C                                          | BEM3          | YDL155W                 | CLB3          |
| YHR185C                                          | PFS1          | YIL007C                 | NAS2          |
| YDL005C                                          | MED2          | YCR084C                 | TUP1          |
| YDR293C                                          | SSD1          | YDR183W                 | PLP1          |
| YLR360W                                          | VPS38         | YOR036W                 | PEP12         |
| YPR084W                                          | YPR084W       | YKL213C                 | DOA1          |
| YJR084W                                          | CSN12         | YMR214W                 | SCJ1          |
| YER116C                                          | SLX8          | YLR150W                 | STM1          |
| YJL176C                                          | SWI3          | YKL041W                 | VPS24         |
| YJR090C                                          | GRR1          | YER027C                 | GAL83         |
| YDR254W                                          | CHL4          | YEL056W                 | HAT2          |
| YFL003C                                          | MSH4          | YLR394W                 | CST9          |
| YOL121C                                          | RPS19A        | YLR093C                 | NYV1          |
| YGR019W                                          | UGA1          | YHR178W                 | STB5          |
| YOR132W                                          | VPS17         | YKR030W                 | GMH1          |
| YFR031C-A                                        | RPL2A         | YPR017C                 | DSS4          |
| YOR001W                                          | RRP6          | YLR429W                 | CRN1          |
| YCR086W                                          | CSM1          | YGR188C                 | BUB1          |
| YPL022W                                          | RAD1          | YKR030W                 | GMH1          |
| YMR224C                                          | MRE11         | YNL116W                 | DMA2          |
| YNL116W                                          | DMA2          | YHR115C                 | DMA1          |

| Predictions at threshold level 0.80 continued... |               |                         |               |
|--------------------------------------------------|---------------|-------------------------|---------------|
| Gene1 of predicted pair                          |               | Gene2 of predicted pair |               |
| Systematic Name                                  | Standard Name | Systematic Name         | Standard Name |
| YJR024C                                          | MDE1          | YOR358W                 | HAP5          |
| YOR106W                                          | VAM3          | YNL079C                 | TPM1          |
| YPL195W                                          | APL5          | YMR214W                 | SCJ1          |
| YOL090W                                          | MSH2          | YGL031C                 | RPL24A        |
| YER087C-B                                        | SBH1          | YBR200W                 | BEM1          |
| YDL184C                                          | RPL41A        | YNL307C                 | MCK1          |
| YER116C                                          | SLX8          | YPL161C                 | BEM4          |
| YCR002C                                          | CDC10         | YDR507C                 | GIN4          |
| YMR004W                                          | MVP1          | YER162C                 | RAD4          |
| YDL160C                                          | DHH1          | YDR253C                 | MET32         |
| YER044C                                          | ERG28         | YDL077C                 | VAM6          |
| YMR153W                                          | NUP53         | YHR200W                 | RPN10         |
| YGL124C                                          | MON1          | YMR230W                 | RPS10B        |
| YPL120W                                          | VPS30         | YDR207C                 | UME6          |
| YLR292C                                          | SEC72         | YML095C                 | RAD10         |
| YJR084W                                          | CSN12         | YDL077C                 | VAM6          |
| YHR060W                                          | VMA22         | YER120W                 | SCS2          |
| YOL147C                                          | PEX11         | YNL117W                 | MLS1          |
| YDL223C                                          | HBT1          | YOR035C                 | SHE4          |
| YDR245W                                          | MNN10         | YKL126W                 | YPK1          |
| YDR358W                                          | GGA1          | YBR280C                 | SAF1          |
| YGL078C                                          | DBP3          | YGL003C                 | CDH1          |
| YLR181C                                          | VTA1          | YKR035W-A               | DID2          |
| YNL032W                                          | SIW14         | YLR398C                 | SKI2          |
| YHR205W                                          | SCH9          | YDR388W                 | RVS167        |
| YPR167C                                          | MET16         | YML028W                 | TSA1          |
| YGR217W                                          | CCH1          | YKR020W                 | VPS51         |
| YOR035C                                          | SHE4          | YKL041W                 | VPS24         |
| YJL190C                                          | RPS22A        | YGR188C                 | BUB1          |

| Predictions at threshold level 0.80 continued... |               |                         |               |
|--------------------------------------------------|---------------|-------------------------|---------------|
| Gene1 of predicted pair                          |               | Gene2 of predicted pair |               |
| Systematic Name                                  | Standard Name | Systematic Name         | Standard Name |
| YKL032C                                          | IXR1          | YDR440W                 | DOT1          |
| YDR156W                                          | RPA14         | YNR052C                 | POP2          |
| YMR224C                                          | MRE11         | YJL172W                 | CPS1          |
| YLR079W                                          | SIC1          | YBL047C                 | EDE1          |
| YDR153C                                          | ENT5          | YDR207C                 | UME6          |
| YDL006W                                          | PTC1          | YEL051W                 | VMA8          |
| YJL127C                                          | SPT10         | YLR429W                 | CRN1          |
| YPL152W                                          | RRD2          | YJR135C                 | MCM22         |
| YDL116W                                          | NUP84         | YJR063W                 | RPA12         |
| YMR153W                                          | NUP53         | YMR016C                 | SOK2          |
| YOR290C                                          | SNF2          | YJR032W                 | CPR7          |
| YOR083W                                          | WHI5          | YJR135C                 | MCM22         |
| YNL087W                                          | TCB2          | YDR137W                 | RGP1          |
| YJR106W                                          | ECM27         | YKR093W                 | PTR2          |
| YGL190C                                          | CDC55         | YJL187C                 | SWE1          |
| YBR200W                                          | BEM1          | YNL307C                 | MCK1          |
| YKL139W                                          | CTK1          | YGL212W                 | VAM7          |
| YBR093C                                          | PHO5          | YOR368W                 | RAD17         |
| YGL212W                                          | VAM7          | YCR053W                 | THR4          |
| YLR399C                                          | BDF1          | YPL152W                 | RRD2          |
| YNL291C                                          | MID1          | YJL095W                 | BCK1          |
| YCR086W                                          | CSM1          | YNL116W                 | DMA2          |
| YMR016C                                          | SOK2          | YJL183W                 | MNN11         |
| YLR309C                                          | IMH1          | YKR030W                 | GMH1          |
| YHR111W                                          | UBA4          | YOR275C                 | RIM20         |
| YMR172W                                          | HOT1          | YAL002W                 | VPS8          |
| YCL037C                                          | SRO9          | YJL004C                 | SYS1          |
| YER120W                                          | SCS2          | YEL051W                 | VMA8          |
| YFR010W                                          | UBP6          | YDR245W                 | MNN10         |

| Predictions at threshold level 0.80 continued... |               |                         |               |
|--------------------------------------------------|---------------|-------------------------|---------------|
| Gene1 of predicted pair                          |               | Gene2 of predicted pair |               |
| Systematic Name                                  | Standard Name | Systematic Name         | Standard Name |
| YGL060W                                          | YBP2          | YML095C                 | RAD10         |
| YEL043W                                          | YEL043W       | YEL051W                 | VMA8          |
| YLR079W                                          | SIC1          | YAR014C                 | BUD14         |
| YLR337C                                          | VRP1          | YPR051W                 | MAK3          |
| YJL006C                                          | CTK2          | YLR425W                 | TUS1          |
| YGR104C                                          | SRB5          | YJL124C                 | LSM1          |
| YLR191W                                          | PEX13         | YDR244W                 | PEX5          |
| YGL060W                                          | YBP2          | YJR005W                 | APL1          |
| YBL067C                                          | UBP13         | YOR035C                 | SHE4          |
| YOR023C                                          | AHC1          | YJR135C                 | MCM22         |
| YMR133W                                          | REC114        | YDL083C                 | RPS16B        |
| YPL129W                                          | TAF14         | YHL025W                 | SNF6          |
| YDR378C                                          | LSM6          | YKL048C                 | ELM1          |
| YMR311C                                          | GLC8          | YCR053W                 | THR4          |
| YJR005W                                          | APL1          | YPL018W                 | CTF19         |
| YMR055C                                          | BUB2          | YGL019W                 | CKB1          |
| YEL065W                                          | SIT1          | YJR032W                 | CPR7          |
| YMR153W                                          | NUP53         | YOR043W                 | WHI2          |
| YBR215W                                          | HPC2          | YML102W                 | CAC2          |
| YGR241C                                          | YAP1802       | YBL047C                 | EDE1          |
| YFL023W                                          | BUD27         | YDR207C                 | UME6          |
| YNR052C                                          | POP2          | YIL036W                 | CST6          |
| YHR060W                                          | VMA22         | YDL006W                 | PTC1          |
| YGL087C                                          | MMS2          | YDR363W-A               | SEM1          |
| YOL145C                                          | CTR9          | YNL107W                 | YAF9          |
| YNL243W                                          | SLA2          | YNL098C                 | RAS2          |
| YKL006W                                          | RPL14A        | YOL081W                 | IRA2          |
| YDR335W                                          | MSN5          | YOL054W                 | PSH1          |
| YGR252W                                          | GCN5          | YDR469W                 | SDC1          |

| Predictions at threshold level 0.80 continued... |               |                         |               |
|--------------------------------------------------|---------------|-------------------------|---------------|
| Gene1 of predicted pair                          |               | Gene2 of predicted pair |               |
| Systematic Name                                  | Standard Name | Systematic Name         | Standard Name |
| YPR018W                                          | RLF2          | YDL005C                 | MED2          |
| YMR198W                                          | CIK1          | YML097C                 | VPS9          |
| YGL078C                                          | DBP3          | YPL137C                 | GIP3          |
| YDR004W                                          | RAD57         | YPR036W                 | VMA13         |
| YKL025C                                          | PAN3          | YDR318W                 | MCM21         |
| YOR337W                                          | TEA1          | YGL212W                 | VAM7          |
| YBR200W                                          | BEM1          | YBR114W                 | RAD16         |
| YDR156W                                          | RPA14         | YNL054W                 | VAC7          |
| YOR043W                                          | WHI2          | YFR036W                 | CDC26         |
| YBR108W                                          | YBR108W       | YIL008W                 | URM1          |
| YHR111W                                          | UBA4          | YJR090C                 | GRR1          |
| YKR061W                                          | KTR2          | YJL006C                 | CTK2          |
| YKL135C                                          | APL2          | YJR058C                 | APS2          |
| YNR064C                                          | YNR064C       | YOL108C                 | INO4          |
| YPL022W                                          | RAD1          | YMR231W                 | PEP5          |
| YBR171W                                          | SEC66         | YDR335W                 | MSN5          |
| YER044C                                          | ERG28         | YLR398C                 | SKI2          |
| YNL087W                                          | TCB2          | YKR035W-A               | DID2          |
| YIL156W                                          | UBP7          | YMR164C                 | MSS11         |
| YLR234W                                          | TOP3          | YAL015C                 | NTG1          |
| YMR153W                                          | NUP53         | YDL083C                 | RPS16B        |
| YNL058C                                          | YNL058C       | YML071C                 | COG8          |
| YGL178W                                          | MPT5          | YAL040C                 | CLN3          |
| YDR363W-A                                        | SEM1          | YLR410W                 | VIP1          |
| YGL161C                                          | YIP5          | YKR001C                 | VPS1          |
| YOR080W                                          | DIA2          | YDR289C                 | RTT103        |
| YPL253C                                          | VIK1          | YKL101W                 | HSL1          |
| YLR410W                                          | VIP1          | YGL031C                 | RPL24A        |
| YKL032C                                          | IXR1          | YJL006C                 | CTK2          |

| Predictions at threshold level 0.80 continued... |               |                         |               |
|--------------------------------------------------|---------------|-------------------------|---------------|
| Gene1 of predicted pair                          |               | Gene2 of predicted pair |               |
| Systematic Name                                  | Standard Name | Systematic Name         | Standard Name |
| YMR026C                                          | PEX12         | YHR200W                 | RPN10         |
| YBL008W                                          | HIR1          | YOR080W                 | DIA2          |
| YHL031C                                          | GOS1          | YGR020C                 | VMA7          |
| YDL002C                                          | NHP10         | YOR308C                 | SNU66         |
| YLR360W                                          | VPS38         | YPL161C                 | BEM4          |
| YMR224C                                          | MRE11         | YNL117W                 | MLS1          |
| YGL133W                                          | ITC1          | YHR152W                 | SPO12         |
| YOR001W                                          | RRP6          | YMR125W                 | STO1          |
| YDR156W                                          | RPA14         | YMR055C                 | BUB2          |
| YNL041C                                          | COG6          | YML071C                 | COG8          |
| YPL037C                                          | EGD1          | YKR030W                 | GMH1          |
| YLR337C                                          | VRP1          | YDR155C                 | CPR1          |
| YMR153W                                          | NUP53         | YLR180W                 | SAM1          |
| YPL115C                                          | BEM3          | YPL018W                 | CTF19         |
| YDR379W                                          | RGA2          | YJL187C                 | SWE1          |
| YEL043W                                          | YEL043W       | YJL004C                 | SYS1          |
| YLR371W                                          | ROM2          | YER049W                 | TPA1          |
| YKR020W                                          | VPS51         | YAR014C                 | BUD14         |
| YFL023W                                          | BUD27         | YDL077C                 | VAM6          |
| YNL325C                                          | FIG4          | YKL048C                 | ELM1          |
| YDR174W                                          | HMO1          | YEL027W                 | CUP5          |
| YOR080W                                          | DIA2          | YNL016W                 | PUB1          |
| YGR072W                                          | UPF3          | YNL041C                 | COG6          |
| YPL161C                                          | BEM4          | YMR038C                 | CCS1          |
| YIR009W                                          | MSL1          | YCR077C                 | PAT1          |
| YER110C                                          | KAP123        | YHR111W                 | UBA4          |
| YOR290C                                          | SNF2          | YER044C                 | ERG28         |
| YPL240C                                          | HSP82         | YGL096W                 | TOS8          |
| YDL101C                                          | DUN1          | YOL030W                 | GAS5          |



| Predictions at threshold level 0.80 continued... |               |                         |               |
|--------------------------------------------------|---------------|-------------------------|---------------|
| Gene1 of predicted pair                          |               | Gene2 of predicted pair |               |
| Systematic Name                                  | Standard Name | Systematic Name         | Standard Name |
| YJL154C                                          | VPS35         | YOR140W                 | SFL1          |
| YKL160W                                          | ELF1          | YCR077C                 | PAT1          |
| YGL200C                                          | EMP24         | YOL081W                 | IRA2          |
| YHR200W                                          | RPN10         | YGL115W                 | SNF4          |
| YFL013C                                          | IES1          | YHL031C                 | GOS1          |
| YDR363W-A                                        | SEM1          | YKL101W                 | HSL1          |
| YHR114W                                          | BZZ1          | YHL002W                 | HSE1          |
| YPL024W                                          | RMI1          | YDR137W                 | RGP1          |
| YLR362W                                          | STE11         | YDL159W                 | STE7          |
| YHL031C                                          | GOS1          | YDR245W                 | MNN10         |
| YDR004W                                          | RAD57         | YML013W                 | UBX2          |
| YPR120C                                          | CLB5          | YDL155W                 | CLB3          |
| YMR198W                                          | CIK1          | YHL027W                 | RIM101        |
| YER110C                                          | KAP123        | YLR399C                 | BDF1          |
| YOR038C                                          | HIR2          | YLR182W                 | SWI6          |
| YLR094C                                          | GIS3          | YNL076W                 | MKS1          |
| YKL048C                                          | ELM1          | YNL289W                 | PCL1          |
| YIL076W                                          | SEC28         | YER161C                 | SPT2          |
| YKL139W                                          | CTK1          | YBR215W                 | HPC2          |
| YLR381W                                          | CTF3          | YEL053C                 | MAK10         |
| YNL291C                                          | MID1          | YPL037C                 | EGD1          |
| YMR091C                                          | NPL6          | YLR357W                 | RSC2          |
| YOL013C                                          | HRD1          | YMR022W                 | UBC7          |
| YLR234W                                          | TOP3          | YOR043W                 | WHI2          |
| YPR131C                                          | NAT3          | YOR195W                 | SLK19         |
| YKL006W                                          | RPL14A        | YJL183W                 | MNN11         |
| YOR212W                                          | STE4          | YDR183W                 | PLP1          |
| YOR337W                                          | TEA1          | YLR192C                 | HCR1          |
| YJR021C                                          | REC107        | YMR133W                 | REC114        |

| Predictions at threshold level 0.80 continued... |               |                         |               |
|--------------------------------------------------|---------------|-------------------------|---------------|
| Gene1 of predicted pair                          |               | Gene2 of predicted pair |               |
| Systematic Name                                  | Standard Name | Systematic Name         | Standard Name |
| YDL020C                                          | RPN4          | YJR060W                 | CBF1          |
| YOR106W                                          | VAM3          | YJR060W                 | CBF1          |
| YDL002C                                          | NHP10         | YOR124C                 | UBP2          |
| YIL034C                                          | CAP2          | YOR358W                 | HAP5          |
| YMR153W                                          | NUP53         | YER115C                 | SPR6          |
| YMR172W                                          | HOT1          | YBR108W                 | YBR108W       |
| YLR234W                                          | TOP3          | YMR231W                 | PEP5          |
| YGR133W                                          | PEX4          | YKR020W                 | VPS51         |
| YNL243W                                          | SLA2          | YNL250W                 | RAD50         |
| YHR156C                                          | LIN1          | YDL192W                 | ARF1          |
| YJL078C                                          | PRY3          | YPR149W                 | NCE102        |
| YLR090W                                          | XDJ1          | YPR030W                 | CSR2          |
| YJR056C                                          | YJR056C       | YPL137C                 | GIP3          |
| YPL022W                                          | RAD1          | YDL226C                 | GCS1          |
| YMR109W                                          | MYO5          | YGL151W                 | NUT1          |
| YFR010W                                          | UBP6          | YDR335W                 | MSN5          |
| YCL037C                                          | SRO9          | YPL120W                 | VPS30         |
| YOL061W                                          | PRS5          | YOR043W                 | WHI2          |
| YML013W                                          | UBX2          | YER162C                 | RAD4          |
| YMR179W                                          | SPT21         | YDL047W                 | SIT4          |
| YEL065W                                          | SIT1          | YPR046W                 | MCM16         |
| YGL003C                                          | CDH1          | YLR370C                 | ARC18         |
| YBR194W                                          | SOY1          | YCR077C                 | PAT1          |
| YLR320W                                          | MMS22         | YJL183W                 | MNN11         |
| YPL105C                                          | YPL105C       | YEL043W                 | YEL043W       |
| YLR192C                                          | HCR1          | YKL126W                 | YPK1          |
| YFR021W                                          | ATG18         | YPR119W                 | CLB2          |
| YPL096C-A                                        | ERI1          | YEL036C                 | ANP1          |
| YMR109W                                          | MYO5          | YAL002W                 | VPS8          |

| Predictions at threshold level 0.80 continued... |               |                         |               |
|--------------------------------------------------|---------------|-------------------------|---------------|
| Gene1 of predicted pair                          |               | Gene2 of predicted pair |               |
| Systematic Name                                  | Standard Name | Systematic Name         | Standard Name |
| YHR039C-A                                        | VMA10         | YDR153C                 | ENT5          |
| YLR360W                                          | VPS38         | YPL018W                 | CTF19         |
| YLR360W                                          | VPS38         | YOR008C                 | SLG1          |
| YDR261C                                          | EXG2          | YFR036W                 | CDC26         |
| YML071C                                          | COG8          | YJR084W                 | CSN12         |
| YBL103C                                          | RTG3          | YER139C                 | YER139C       |
| YNL106C                                          | INP52         | YNL054W                 | VAC7          |
| YIL156W                                          | UBP7          | YJR059W                 | PTK2          |
| YHR178W                                          | STB5          | YKL048C                 | ELM1          |
| YGR054W                                          | YGR054W       | YHL002W                 | HSE1          |
| YOR080W                                          | DIA2          | YCR077C                 | PAT1          |
| YFR036W                                          | CDC26         | YDR440W                 | DOT1          |
| YCL001W                                          | RER1          | YLR309C                 | IMH1          |
| YML103C                                          | NUP188        | YGL163C                 | RAD54         |
| YGL025C                                          | PGD1          | YNL307C                 | MCK1          |
| YOR368W                                          | RAD17         | YDR207C                 | UME6          |
| YJL187C                                          | SWE1          | YBR082C                 | UBC4          |
| YOR127W                                          | RGA1          | YEL053C                 | MAK10         |
| YGL223C                                          | COG1          | YML067C                 | ERV41         |
| YLL007C                                          | YLL007C       | YLR234W                 | TOP3          |
| YBR107C                                          | IML3          | YIL008W                 | URM1          |
| YLR192C                                          | HCR1          | YDR137W                 | RGP1          |
| YDR225W                                          | HTA1          | YNL030W                 | HHF2          |
| YBL078C                                          | ATG8          | YNR007C                 | ATG3          |
| YDR477W                                          | SNF1          | YJR056C                 | YJR056C       |
| YLR221C                                          | RSA3          | YKR024C                 | DBP7          |
| YMR202W                                          | ERG2          | YJR135C                 | MCM22         |
| YGR108W                                          | CLB1          | YMR109W                 | MYO5          |
| YMR199W                                          | CLN1          | YDR264C                 | AKR1          |

| Predictions at threshold level 0.80 continued... |               |                         |               |
|--------------------------------------------------|---------------|-------------------------|---------------|
| Gene1 of predicted pair                          |               | Gene2 of predicted pair |               |
| Systematic Name                                  | Standard Name | Systematic Name         | Standard Name |
| YDR108W                                          | GSG1          | YJR135C                 | MCM22         |
| YML117W                                          | NAB6          | YGR217W                 | CCH1          |
| YJL124C                                          | LSM1          | YIL103W                 | DPH1          |
| YJL138C                                          | TIF2          | YLR350W                 | ORM2          |
| YFR024C-A                                        | LSB3          | YGR268C                 | HUA1          |
| YMR016C                                          | SOK2          | YDR207C                 | UME6          |
| YER087C-B                                        | SBH1          | YGL226C-A               | OST5          |
| YFR031C-A                                        | RPL2A         | YNR072W                 | HXT17         |
| YMR016C                                          | SOK2          | YKR099W                 | BAS1          |
| YPL018W                                          | CTF19         | YNL147W                 | LSM7          |
| YNL206C                                          | RTT106        | YDR264C                 | AKR1          |
| YNL106C                                          | INP52         | YHR108W                 | GGA2          |
| YDR156W                                          | RPA14         | YML016C                 | PPZ1          |
| YKL025C                                          | PAN3          | YGL237C                 | HAP2          |
| YDR192C                                          | NUP42         | YDR207C                 | UME6          |
| YDR484W                                          | VPS52         | YJR032W                 | CPR7          |
| YMR142C                                          | RPL13B        | YDR137W                 | RGP1          |
| YML038C                                          | YMD8          | YPL195W                 | APL5          |
| YKL116C                                          | PRR1          | YLR371W                 | ROM2          |
| YBR200W                                          | BEM1          | YIL008W                 | URM1          |
| YPL022W                                          | RAD1          | YJL187C                 | SWE1          |
| YDR392W                                          | SPT3          | YBR089C-A               | NHP6B         |
| YGL212W                                          | VAM7          | YKR020W                 | VPS51         |
| YOR001W                                          | RRP6          | YML016C                 | PPZ1          |
| YNL288W                                          | CAF40         | YMR109W                 | MYO5          |
| YLR170C                                          | APS1          | YKL135C                 | APL2          |
| YML103C                                          | NUP188        | YLR182W                 | SWI6          |
| YBR171W                                          | SEC66         | YEL056W                 | HAT2          |
| YMR199W                                          | CLN1          | YGL163C                 | RAD54         |

| Predictions at threshold level 0.80 continued... |               |                         |               |
|--------------------------------------------------|---------------|-------------------------|---------------|
| Gene1 of predicted pair                          |               | Gene2 of predicted pair |               |
| Systematic Name                                  | Standard Name | Systematic Name         | Standard Name |
| YLR386W                                          | VAC14         | YBR084C-A               | RPL19A        |
| YKL025C                                          | PAN3          | YPR046W                 | MCM16         |
| YDL042C                                          | SIR2          | YDR227W                 | SIR4          |
| YER116C                                          | SLX8          | YER044C                 | ERG28         |
| YEL065W                                          | SIT1          | YBR280C                 | SAF1          |
| YPL057C                                          | SUR1          | YKL101W                 | HSL1          |
| YNL288W                                          | CAF40         | YPL253C                 | VIK1          |
| YOR106W                                          | VAM3          | YJR040W                 | GEF1          |
| YLR398C                                          | SKI2          | YER040W                 | GLN3          |
| YDR146C                                          | SWI5          | YBR215W                 | HPC2          |
| YNL206C                                          | RTT106        | YDL185W                 | TFP1          |
| YLR360W                                          | VPS38         | YOR069W                 | VPS5          |
| YPL018W                                          | CTF19         | YGL252C                 | RTG2          |
| YLR381W                                          | CTF3          | YNL236W                 | SIN4          |
| YLR292C                                          | SEC72         | YHR134W                 | WSS1          |
| YMR224C                                          | MRE11         | YJR084W                 | CSN12         |
| YDL223C                                          | HBT1          | YNL041C                 | COG6          |
| YFR010W                                          | UBP6          | YOR066W                 | MSA1          |
| YLR441C                                          | RPS1A         | YOR035C                 | SHE4          |
| YNL215W                                          | IES2          | YLR398C                 | SKI2          |
| YJL154C                                          | VPS35         | YNL199C                 | GCR2          |
| YJL172W                                          | CPS1          | YPL161C                 | BEM4          |
| YDR137W                                          | RGP1          | YNL107W                 | YAF9          |
| YHR111W                                          | UBA4          | YAL002W                 | VPS8          |
| YLR144C                                          | ACF2          | YOR284W                 | HUA2          |
| YJL172W                                          | CPS1          | YGL115W                 | SNF4          |
| YOR140W                                          | SFL1          | YNL079C                 | TPM1          |
| YDR130C                                          | FIN1          | YLR254C                 | NDL1          |
| YOR290C                                          | SNF2          | YNL107W                 | YAF9          |

| Predictions at threshold level 0.80 continued... |               |                         |               |
|--------------------------------------------------|---------------|-------------------------|---------------|
| Gene1 of predicted pair                          |               | Gene2 of predicted pair |               |
| Systematic Name                                  | Standard Name | Systematic Name         | Standard Name |
| YDR439W                                          | LRS4          | YDR378C                 | LSM6          |
| YJR031C                                          | GEA1          | YDL137W                 | ARF2          |
| YGL087C                                          | MMS2          | YHR178W                 | STB5          |
| YPL161C                                          | BEM4          | YHR012W                 | VPS29         |
| YER144C                                          | UBP5          | YPR030W                 | CSR2          |
| YMR026C                                          | PEX12         | YJR056C                 | YJR056C       |
| YHR134W                                          | WSS1          | YBR200W                 | BEM1          |
| YGL087C                                          | MMS2          | YGR188C                 | BUB1          |
| YER110C                                          | KAP123        | YPL253C                 | VIK1          |
| YMR224C                                          | MRE11         | YML095C                 | RAD10         |
| YLR360W                                          | VPS38         | YMR231W                 | PEP5          |
| YLR150W                                          | STM1          | YDR254W                 | CHL4          |
| YOR106W                                          | VAM3          | YHL020C                 | OPI1          |
| YDL223C                                          | HBT1          | YLR320W                 | MMS22         |
| YOL111C                                          | MDY2          | YBR019C                 | GAL10         |
| YOR337W                                          | TEA1          | YLR371W                 | ROM2          |
| YPL018W                                          | CTF19         | YDL226C                 | GCS1          |
| YDR484W                                          | VPS52         | YNL238W                 | KEX2          |
| YHR200W                                          | RPN10         | YDL006W                 | PTC1          |
| YNL166C                                          | BNI5          | YGR188C                 | BUB1          |
| YBL103C                                          | RTG3          | YCR053W                 | THR4          |
| YBR112C                                          | CYC8          | YPR068C                 | HOS1          |
| YMR224C                                          | MRE11         | YPL022W                 | RAD1          |
| YDR378C                                          | LSM6          | YPR120C                 | CLB5          |
| YDL155W                                          | CLB3          | YKL101W                 | HSL1          |
| YFR010W                                          | UBP6          | YCR086W                 | CSM1          |
| YBR217W                                          | ATG12         | YLR180W                 | SAM1          |
| YDL116W                                          | NUP84         | YPL152W                 | RRD2          |
| YOR270C                                          | VPH1          | YKR099W                 | BAS1          |

| Predictions at threshold level 0.80 continued... |               |                         |               |
|--------------------------------------------------|---------------|-------------------------|---------------|
| Gene1 of predicted pair                          |               | Gene2 of predicted pair |               |
| Systematic Name                                  | Standard Name | Systematic Name         | Standard Name |
| YGL043W                                          | DST1          | YHR056C                 | RSC30         |
| YBL058W                                          | SHP1          | YOL081W                 | IRA2          |
| YNL253W                                          | TEX1          | YHR167W                 | THP2          |
| YNL333W                                          | SNZ2          | YMR096W                 | SNZ1          |
| YDL125C                                          | HNT1          | YNL236W                 | SIN4          |
| YDR080W                                          | VPS41         | YPR173C                 | VPS4          |
| YKR035W-A                                        | DID2          | YLR371W                 | ROM2          |
| YEL050C                                          | RML2          | YGL003C                 | CDH1          |
| YGL033W                                          | HOP2          | YDR484W                 | VPS52         |
| YDL002C                                          | NHP10         | YHR200W                 | RPN10         |
| YDL077C                                          | VAM6          | YLR398C                 | SKI2          |
| YNL199C                                          | GCR2          | YMR038C                 | CCS1          |
| YML038C                                          | YMD8          | YKR030W                 | GMH1          |
| YDR285W                                          | ZIP1          | YLR394W                 | CST9          |
| YKL139W                                          | CTK1          | YLR254C                 | NDL1          |
| YDR245W                                          | MNN10         | YDR289C                 | RTT103        |
| YLR381W                                          | CTF3          | YKL048C                 | ELM1          |
| YDR484W                                          | VPS52         | YHR200W                 | RPN10         |
| YOR035C                                          | SHE4          | YBR280C                 | SAF1          |
| YLR058C                                          | SHM2          | YGL003C                 | CDH1          |
| YIL053W                                          | RHR2          | YGL033W                 | HOP2          |
| YDR137W                                          | RGP1          | YGL200C                 | EMP24         |
| YAL024C                                          | LTE1          | YNR052C                 | POP2          |
| YKL116C                                          | PRR1          | YNL076W                 | MKS1          |
| YHR128W                                          | FUR1          | YPL240C                 | HSP82         |
| YDL192W                                          | ARF1          | YDR310C                 | SUM1          |
| YLR083C                                          | EMP70         | YPL037C                 | EGD1          |
| YJR135C                                          | MCM22         | YGL003C                 | CDH1          |
| YPL057C                                          | SUR1          | YDR440W                 | DOT1          |

| Predictions at threshold level 0.80 continued... |               |                         |               |
|--------------------------------------------------|---------------|-------------------------|---------------|
| Gene1 of predicted pair                          |               | Gene2 of predicted pair |               |
| Systematic Name                                  | Standard Name | Systematic Name         | Standard Name |
| YNL215W                                          | IES2          | YGR014W                 | MSB2          |
| YMR255W                                          | GFD1          | YIL033C                 | BCY1          |
| YER114C                                          | BOI2          | YNL116W                 | DMA2          |
| YMR199W                                          | CLN1          | YDR245W                 | MNN10         |
| YER001W                                          | MNN1          | YEL044W                 | IES6          |
| YKR001C                                          | VPS1          | YPL105C                 | YPL105C       |
| YLL007C                                          | YLL007C       | YHR134W                 | WSS1          |
| YPR017C                                          | DSS4          | YKR020W                 | VPS51         |
| YHR152W                                          | SPO12         | YNL116W                 | DMA2          |
| YHR084W                                          | STE12         | YLR362W                 | STE11         |
| YHR060W                                          | VMA22         | YLR320W                 | MMS22         |
| YBR215W                                          | HPC2          | YPL106C                 | SSE1          |
| YHR039C-A                                        | VMA10         | YBL025W                 | RRN10         |
| YNL058C                                          | YNL058C       | YNR072W                 | HXT17         |
| YNL243W                                          | SLA2          | YNR051C                 | BRE5          |
| YDR202C                                          | RAV2          | YNL044W                 | YIP3          |
| YDR363W-A                                        | SEM1          | YLR182W                 | SWI6          |
| YDR183W                                          | PLP1          | YLR182W                 | SWI6          |
| YFR010W                                          | UBP6          | YLR192C                 | HCR1          |
| YAL020C                                          | ATS1          | YLR425W                 | TUS1          |
| YBR200W                                          | BEM1          | YBR084C-A               | RPL19A        |
| YMR153W                                          | NUP53         | YNL058C                 | YNL058C       |
| YJL154C                                          | VPS35         | YML001W                 | YPT7          |
| YBR200W                                          | BEM1          | YOR140W                 | SFL1          |
| YPR017C                                          | DSS4          | YOR127W                 | RGA1          |
| YOR127W                                          | RGA1          | YGR105W                 | VMA21         |
| YML103C                                          | NUP188        | YMR273C                 | ZDS1          |
| YDR335W                                          | MSN5          | YML112W                 | CTK3          |
| YPL161C                                          | BEM4          | YBL085W                 | BOI1          |



| Predictions at threshold level 0.80 continued... |               |                         |               |
|--------------------------------------------------|---------------|-------------------------|---------------|
| Gene1 of predicted pair                          |               | Gene2 of predicted pair |               |
| Systematic Name                                  | Standard Name | Systematic Name         | Standard Name |
| YLR083C                                          | EMP70         | YGL115W                 | SNF4          |
| YBR030W                                          | YBR030W       | YNL087W                 | TCB2          |
| YMR224C                                          | MRE11         | YOR337W                 | TEA1          |
| YBL047C                                          | EDE1          | YDR264C                 | AKR1          |
| YMR198W                                          | CIK1          | YBR171W                 | SEC66         |
| YHR056C                                          | RSC30         | YKL057C                 | NUP120        |
| YMR089C                                          | YTA12         | YEL036C                 | ANP1          |
| YHR178W                                          | STB5          | YOR358W                 | HAP5          |
| YCL001W                                          | RER1          | YDR310C                 | SUM1          |
| YLR090W                                          | XDJ1          | YMR224C                 | MRE11         |
| YEL053C                                          | MAK10         | YLR371W                 | ROM2          |
| YPL042C                                          | SSN3          | YEL013W                 | VAC8          |
| YFR010W                                          | UBP6          | YBR171W                 | SEC66         |
| YCR020C-A                                        | MAK31         | YDR293C                 | SSD1          |
| YCR024C-A                                        | PMP1          | YKR024C                 | DBP7          |
| YJL183W                                          | MNN11         | YKL041W                 | VPS24         |
| YMR224C                                          | MRE11         | YGL200C                 | EMP24         |
| YOR106W                                          | VAM3          | YER122C                 | GLO3          |
| YFR031C-A                                        | RPL2A         | YJR033C                 | RAV1          |
| YDR507C                                          | GIN4          | YGR135W                 | PRE9          |
| YFL023W                                          | BUD27         | YML095C                 | RAD10         |
| YLR320W                                          | MMS22         | YPL089C                 | RLM1          |
| YNL218W                                          | MGS1          | YMR116C                 | ASC1          |
| YGR104C                                          | SRB5          | YBR020W                 | GAL1          |
| YML112W                                          | CTK3          | YNL107W                 | YAF9          |
| YHL031C                                          | GOS1          | YML001W                 | YPT7          |
| YJR140C                                          | HIR3          | YEL056W                 | HAT2          |
| YOR106W                                          | VAM3          | YEL051W                 | VMA8          |
| YDR439W                                          | LRS4          | YOL081W                 | IRA2          |

| Predictions at threshold level 0.80 continued... |               |                         |               |
|--------------------------------------------------|---------------|-------------------------|---------------|
| Gene1 of predicted pair                          |               | Gene2 of predicted pair |               |
| Systematic Name                                  | Standard Name | Systematic Name         | Standard Name |
| YER144C                                          | UBP5          | YBR019C                 | GAL10         |
| YPL195W                                          | APL5          | YDR207C                 | UME6          |
| YDR358W                                          | GGA1          | YLR206W                 | ENT2          |
| YJL122W                                          | ALB1          | YDR101C                 | ARX1          |
| YJL176C                                          | SWI3          | YML097C                 | VPS9          |
| YBL008W                                          | HIR1          | YML016C                 | PPZ1          |
| YBR215W                                          | HPC2          | YEL013W                 | VAC8          |
| YLR360W                                          | VPS38         | YDL155W                 | CLB3          |
| YER116C                                          | SLX8          | YBR108W                 | YBR108W       |
| YJL154C                                          | VPS35         | YBR108W                 | YBR108W       |
| YPR017C                                          | DSS4          | YNR049C                 | MSO1          |
| YGL147C                                          | RPL9A         | YOL121C                 | RPS19A        |
| YNL069C                                          | RPL16B        | YBL102W                 | SFT2          |
| YNL238W                                          | KEX2          | YHR081W                 | LRP1          |
| YDR146C                                          | SWI5          | YEL036C                 | ANP1          |
| YGL078C                                          | DBP3          | YDR484W                 | VPS52         |
| YPL195W                                          | APL5          | YDR153C                 | ENT5          |
| YML115C                                          | VAN1          | YAL002W                 | VPS8          |
| YBL047C                                          | EDE1          | YPL256C                 | CLN2          |
| YKR059W                                          | TIF1          | YGR188C                 | BUB1          |
| YIL133C                                          | RPL16A        | YOR208W                 | PTP2          |
| YNL041C                                          | COG6          | YNL127W                 | FAR11         |
| YLL039C                                          | UBI4          | YGL200C                 | EMP24         |
| YIL148W                                          | RPL40A        | YGL016W                 | KAP122        |
| YNL238W                                          | KEX2          | YDR207C                 | UME6          |
| YFR031C-A                                        | RPL2A         | YER144C                 | UBP5          |
| YMR231W                                          | PEP5          | YOR035C                 | SHE4          |
| YLR441C                                          | RPS1A         | YKL048C                 | ELM1          |
| YNL215W                                          | IES2          | YIL036W                 | CST6          |

| Predictions at threshold level 0.80 continued... |               |                         |               |
|--------------------------------------------------|---------------|-------------------------|---------------|
| Gene1 of predicted pair                          |               | Gene2 of predicted pair |               |
| Systematic Name                                  | Standard Name | Systematic Name         | Standard Name |
| YLR360W                                          | VPS38         | YMR127C                 | SAS2          |
| YFL013C                                          | IES1          | YDR137W                 | RGP1          |
| YFR031C-A                                        | RPL2A         | YNL032W                 | SIW14         |
| YJR094C                                          | IME1          | YDR207C                 | UME6          |
| YDR225W                                          | HTA1          | YNL215W                 | IES2          |
| YBL102W                                          | SFT2          | YGL223C                 | COG1          |
| YAL024C                                          | LTE1          | YGL038C                 | OCH1          |
| YMR004W                                          | MVP1          | YOR327C                 | SNC2          |
| YER044C                                          | ERG28         | YGL003C                 | CDH1          |
| YGL066W                                          | SGF73         | YPL256C                 | CLN2          |
| YLR006C                                          | SSK1          | YDR293C                 | SSD1          |
| YDL020C                                          | RPN4          | YMR198W                 | CIK1          |
| YER116C                                          | SLX8          | YLR032W                 | RAD5          |
| YOR043W                                          | WHI2          | YER040W                 | GLN3          |
| YER120W                                          | SCS2          | YML001W                 | YPT7          |
| YLR090W                                          | XDJ1          | YKR035W-A               | DID2          |
| YDR129C                                          | SAC6          | YCR077C                 | PAT1          |
| YDR225W                                          | HTA1          | YDR318W                 | MCM21         |
| YOR008C                                          | SLG1          | YEL036C                 | ANP1          |
| YDR477W                                          | SNF1          | YJR084W                 | CSN12         |
| YLR233C                                          | EST1          | YGR188C                 | BUB1          |
| YGL135W                                          | RPL1B         | YDR129C                 | SAC6          |
| YPL022W                                          | RAD1          | YLR352W                 | YLR352W       |
| YCR077C                                          | PAT1          | YOR038C                 | HIR2          |
| YHR156C                                          | LIN1          | YNL307C                 | MCK1          |
| YKR035W-A                                        | DID2          | YER139C                 | YER139C       |
| YKL139W                                          | CTK1          | YDL083C                 | RPS16B        |
| YNL107W                                          | YAF9          | YAL002W                 | VPS8          |
| YMR214W                                          | SCJ1          | YLR180W                 | SAM1          |

| Predictions at threshold level 0.80 continued... |               |                         |               |
|--------------------------------------------------|---------------|-------------------------|---------------|
| Gene1 of predicted pair                          |               | Gene2 of predicted pair |               |
| Systematic Name                                  | Standard Name | Systematic Name         | Standard Name |
| YHR010W                                          | RPL27A        | YML028W                 | TSA1          |
| YGR019W                                          | UGA1          | YMR127C                 | SAS2          |
| YPR036W                                          | VMA13         | YBL025W                 | RRN10         |
| YGL163C                                          | RAD54         | YCR086W                 | CSM1          |
| YDL006W                                          | PTC1          | YER118C                 | SHO1          |
| YKL025C                                          | PAN3          | YGL151W                 | NUT1          |
| YDR363W-A                                        | SEM1          | YER161C                 | SPT2          |
| YIL132C                                          | CSM2          | YHL006C                 | SHU1          |
| YOR270C                                          | VPH1          | YGR020C                 | VMA7          |
| YHR108W                                          | GGA2          | YJL095W                 | BCK1          |
| YML115C                                          | VAN1          | YAL055W                 | PEX22         |
| YNL087W                                          | TCB2          | YMR214W                 | SCJ1          |
| YHR161C                                          | YAP1801       | YGL095C                 | VPS45         |
| YBR173C                                          | UMP1          | YKL126W                 | YPK1          |
| YLR288C                                          | MEC3          | YLR320W                 | MMS22         |
| YNL297C                                          | MON2          | YMR038C                 | CCS1          |
| YDL020C                                          | RPN4          | YOR243C                 | PUS7          |
| YBR194W                                          | SOY1          | YDL006W                 | PTC1          |
| YOR327C                                          | SNC2          | YMR214W                 | SCJ1          |
| YNL291C                                          | MID1          | YPR046W                 | MCM16         |
| YGL100W                                          | SEH1          | YMR048W                 | CSM3          |
| YGR108W                                          | CLB1          | YAR014C                 | BUD14         |
| YJL058C                                          | BIT61         | YJL006C                 | CTK2          |
| YGL212W                                          | VAM7          | YBR171W                 | SEC66         |
| YOR127W                                          | RGA1          | YDR379W                 | RGA2          |
| YGL212W                                          | VAM7          | YJL004C                 | SYS1          |
| YJR084W                                          | CSN12         | YLR398C                 | SKI2          |
| YKR020W                                          | VPS51         | YJL117W                 | PHO86         |
| YCL027W                                          | FUS1          | YPR119W                 | CLB2          |

| Predictions at threshold level 0.80 continued... |               |                         |               |
|--------------------------------------------------|---------------|-------------------------|---------------|
| Gene1 of predicted pair                          |               | Gene2 of predicted pair |               |
| Systematic Name                                  | Standard Name | Systematic Name         | Standard Name |
| YOL121C                                          | RPS19A        | YML071C                 | COG8          |
| YKL213C                                          | DOA1          | YOR124C                 | UBP2          |
| YGR104C                                          | SRB5          | YPL129W                 | TAF14         |
| YDR108W                                          | GSG1          | YOR327C                 | SNC2          |
| YHR039C-A                                        | VMA10         | YKL041W                 | VPS24         |
| YPR030W                                          | CSR2          | YPR046W                 | MCM16         |
| YNL307C                                          | MCK1          | YDL192W                 | ARF1          |
| YPL057C                                          | SUR1          | YJR032W                 | CPR7          |
| YBR108W                                          | YBR108W       | YEL060C                 | PRB1          |
| YER139C                                          | YER139C       | YOR327C                 | SNC2          |
| YMR042W                                          | ARG80         | YDR207C                 | UME6          |
| YKR048C                                          | NAP1          | YHR115C                 | DMA1          |
| YPR051W                                          | MAK3          | YPR046W                 | MCM16         |
| YCR053W                                          | THR4          | YBR036C                 | CSG2          |
| YGR019W                                          | UGA1          | YBR114W                 | RAD16         |
| YMR109W                                          | MYO5          | YKL048C                 | ELM1          |
| YLR381W                                          | CTF3          | YHR111W                 | UBA4          |
| YMR224C                                          | MRE11         | YFR010W                 | UBP6          |
| YHR205W                                          | SCH9          | YER049W                 | TPA1          |
| YML115C                                          | VAN1          | YDL077C                 | VAM6          |
| YPR120C                                          | CLB5          | YKL114C                 | APN1          |
| YER087C-B                                        | SBH1          | YGL058W                 | RAD6          |
| YGR270W                                          | YTA7          | YIL103W                 | DPH1          |
| YMR016C                                          | SOK2          | YER040W                 | GLN3          |
| YLR399C                                          | BDF1          | YAR014C                 | BUD14         |
| YLR337C                                          | VRP1          | YNL166C                 | BNI5          |
| YGL078C                                          | DBP3          | YER144C                 | UBP5          |
| YOR358W                                          | HAP5          | YMR055C                 | BUB2          |
| YBR200W                                          | BEM1          | YLR094C                 | GIS3          |

| Predictions at threshold level 0.80 continued... |               |                         |               |
|--------------------------------------------------|---------------|-------------------------|---------------|
| Gene1 of predicted pair                          |               | Gene2 of predicted pair |               |
| Systematic Name                                  | Standard Name | Systematic Name         | Standard Name |
| YJL053W                                          | PEP8          | YOR036W                 | PEP12         |
| YJR140C                                          | HIR3          | YGR071C                 | YGR071C       |
| YLR386W                                          | VAC14         | YKL048C                 | ELM1          |
| YGR019W                                          | UGA1          | YBL021C                 | HAP3          |
| YGR270W                                          | YTA7          | YMR038C                 | CCS1          |
| YDR004W                                          | RAD57         | YPL024W                 | RMI1          |
| YMR284W                                          | YKU70         | YDL013W                 | SLX5          |
| YLR083C                                          | EMP70         | YJR033C                 | RAV1          |
| YCL037C                                          | SRO9          | YGR071C                 | YGR071C       |
| YML115C                                          | VAN1          | YPL089C                 | RLM1          |
| YNR072W                                          | HXT17         | YEL053C                 | MAK10         |
| YBR200W                                          | BEM1          | YFR040W                 | SAP155        |
| YLR441C                                          | RPS1A         | YOR043W                 | WHI2          |
| YOR132W                                          | VPS17         | YOL108C                 | INO4          |
| YBL058W                                          | SHP1          | YDR310C                 | SUM1          |
| YMR026C                                          | PEX12         | YDR207C                 | UME6          |
| YDL006W                                          | PTC1          | YAL030W                 | SNC1          |
| YNL106C                                          | INP52         | YGR072W                 | UPF3          |
| YKL139W                                          | CTK1          | YKL048C                 | ELM1          |
| YLR043C                                          | TRX1          | YOR106W                 | VAM3          |
| YDR335W                                          | MSN5          | YDR378C                 | LSM6          |
| YGL078C                                          | DBP3          | YML071C                 | COG8          |
| YKR001C                                          | VPS1          | YJL004C                 | SYS1          |
| YIL076W                                          | SEC28         | YLR452C                 | SST2          |
| YFR010W                                          | UBP6          | YGL115W                 | SNF4          |
| YKR095W                                          | MLP1          | YDR207C                 | UME6          |
| YOR195W                                          | SLK19         | YCR086W                 | CSM1          |
| YHR178W                                          | STB5          | YGL163C                 | RAD54         |
| YJL078C                                          | PRY3          | YOR071C                 | THI71         |

| Predictions at threshold level 0.80 continued... |               |                         |               |
|--------------------------------------------------|---------------|-------------------------|---------------|
| Gene1 of predicted pair                          |               | Gene2 of predicted pair |               |
| Systematic Name                                  | Standard Name | Systematic Name         | Standard Name |
| YDR137W                                          | RGP1          | YBR127C                 | VMA2          |
| YJR056C                                          | YJR056C       | YKR099W                 | BAS1          |
| YLR386W                                          | VAC14         | YGL003C                 | CDH1          |
| YOR008C                                          | SLG1          | YNL030W                 | HHF2          |
| YLR090W                                          | XDJ1          | YER116C                 | SLX8          |
| YDR080W                                          | VPS41         | YGL054C                 | ERV14         |
| YLR095C                                          | IOC2          | YFR036W                 | CDC26         |
| YDL020C                                          | RPN4          | YEL056W                 | HAT2          |
| YOR337W                                          | TEA1          | YJR094C                 | IME1          |
| YML115C                                          | VAN1          | YBL047C                 | EDE1          |
| YLR079W                                          | SIC1          | YER049W                 | TPA1          |
| YML115C                                          | VAN1          | YNR072W                 | HXT17         |
| YDR225W                                          | HTA1          | YMR038C                 | CCS1          |
| YDR379W                                          | RGA2          | YHR200W                 | RPN10         |
| YMR026C                                          | PEX12         | YNL214W                 | PEX17         |
| YNL153C                                          | GIM3          | YHR056C                 | RSC30         |
| YBR200W                                          | BEM1          | YBR260C                 | RGD1          |
| YKL032C                                          | IXR1          | YDL047W                 | SIT4          |
| YBL051C                                          | PIN4          | YHR114W                 | BZZ1          |
| YNL206C                                          | RTT106        | YGL163C                 | RAD54         |
| YJL060W                                          | BNA3          | YOR080W                 | DIA2          |
| YGL212W                                          | VAM7          | YDL223C                 | HBT1          |
| YOR001W                                          | RRP6          | YNL107W                 | YAF9          |
| YDR383C                                          | NKP1          | YDR156W                 | RPA14         |
| YDR156W                                          | RPA14         | YBR200W                 | BEM1          |
| YCR020C-A                                        | MAK31         | YCL001W                 | RER1          |
| YGR108W                                          | CLB1          | YOR001W                 | RRP6          |
| YPR040W                                          | TIP41         | YHR115C                 | DMA1          |
| YPR171W                                          | BSP1          | YDR245W                 | MNN10         |

| Predictions at threshold level 0.80 continued... |               |                         |               |
|--------------------------------------------------|---------------|-------------------------|---------------|
| Gene1 of predicted pair                          |               | Gene2 of predicted pair |               |
| Systematic Name                                  | Standard Name | Systematic Name         | Standard Name |
| YLR148W                                          | PEP3          | YJL029C                 | VPS53         |
| YMR205C                                          | PFK2          | YDL006W                 | PTC1          |
| YPL195W                                          | APL5          | YDL192W                 | ARF1          |
| YER096W                                          | SHC1          | YEL036C                 | ANP1          |
| YDR245W                                          | MNN10         | YCR088W                 | ABP1          |
| YDR245W                                          | MNN10         | YBR131W                 | CCZ1          |
| YHR013C                                          | ARD1          | YFR030W                 | MET10         |
| YML038C                                          | YMD8          | YML071C                 | COG8          |
| YDR156W                                          | RPA14         | YKL139W                 | CTK1          |
| YML038C                                          | YMD8          | YDL077C                 | VAM6          |
| YPL240C                                          | HSP82         | YBL071W-A               | KTI11         |
| YLR320W                                          | MMS22         | YJR084W                 | CSN12         |
| YFR031C-A                                        | RPL2A         | YGL054C                 | ERV14         |
| YAL024C                                          | LTE1          | YLR095C                 | IOC2          |
| YOR033C                                          | EXO1          | YML102W                 | CAC2          |
| YHR156C                                          | LIN1          | YDR358W                 | GGA1          |
| YBR107C                                          | IML3          | YLR032W                 | RAD5          |
| YOR275C                                          | RIM20         | YDL006W                 | PTC1          |
| YMR026C                                          | PEX12         | YLR094C                 | GIS3          |
| YML095C                                          | RAD10         | YLR447C                 | VMA6          |
| YER161C                                          | SPT2          | YIR005W                 | IST3          |
| YBR188C                                          | NTC20         | YPL213W                 | LEA1          |
| YDL116W                                          | NUP84         | YFR036W                 | CDC26         |
| YPL161C                                          | BEM4          | YGR152C                 | RSR1          |
| YLR192C                                          | HCR1          | YLR094C                 | GIS3          |
| YBL019W                                          | APN2          | YOL043C                 | NTG2          |
| YPL001W                                          | HAT1          | YBR036C                 | CSG2          |
| YKL048C                                          | ELM1          | YHR013C                 | ARD1          |
| YPL161C                                          | BEM4          | YDR310C                 | SUM1          |



| Predictions at threshold level 0.80 continued... |               |                         |               |
|--------------------------------------------------|---------------|-------------------------|---------------|
| Gene1 of predicted pair                          |               | Gene2 of predicted pair |               |
| Systematic Name                                  | Standard Name | Systematic Name         | Standard Name |
| YDR335W                                          | MSN5          | YLR254C                 | NDL1          |
| YMR199W                                          | CLN1          | YER096W                 | SHC1          |
| YKR057W                                          | RPS21A        | YHR115C                 | DMA1          |
| YAL024C                                          | LTE1          | YIL076W                 | SEC28         |
| YDL002C                                          | NHP10         | YEL056W                 | HAT2          |
| YML001W                                          | YPT7          | YNL127W                 | FAR11         |
| YFR031C-A                                        | RPL2A         | YML001W                 | YPT7          |
| YJR033C                                          | RAV1          | YLR309C                 | IMH1          |
| YKL139W                                          | CTK1          | YDR440W                 | DOT1          |
| YIL076W                                          | SEC28         | YER122C                 | GLO3          |
| YCR088W                                          | ABP1          | YLR396C                 | VPS33         |
| YDL020C                                          | RPN4          | YKL101W                 | HSL1          |
| YNL248C                                          | RPA49         | YDR378C                 | LSM6          |
| YMR224C                                          | MRE11         | YBR171W                 | SEC66         |
| YKL213C                                          | DOA1          | YNL107W                 | YAF9          |
| YJL095W                                          | BCK1          | YEL056W                 | HAT2          |
| YER144C                                          | UBP5          | YKR035W-A               | DID2          |
| YPL024W                                          | RMI1          | YMR230W                 | RPS10B        |
| YBR107C                                          | IML3          | YNL307C                 | MCK1          |
| YNL288W                                          | CAF40         | YDR318W                 | MCM21         |
| YDL190C                                          | UFD2          | YMR276W                 | DSK2          |
| YOR358W                                          | HAP5          | YEL056W                 | HAT2          |
| YLR090W                                          | XDJ1          | YDR310C                 | SUM1          |
| YPL024W                                          | RMI1          | YCR086W                 | CSM1          |
| YGL147C                                          | RPL9A         | YOR327C                 | SNC2          |
| YMR133W                                          | REC114        | YDR261C                 | EXG2          |
| YGL212W                                          | VAM7          | YGL054C                 | ERV14         |
| YKL007W                                          | CAP1          | YGL124C                 | MON1          |
| YOR195W                                          | SLK19         | YDR200C                 | VPS64         |

| Predictions at threshold level 0.80 continued... |               |                         |               |
|--------------------------------------------------|---------------|-------------------------|---------------|
| Gene1 of predicted pair                          |               | Gene2 of predicted pair |               |
| Systematic Name                                  | Standard Name | Systematic Name         | Standard Name |
| YDR389W                                          | SAC7          | YLR429W                 | CRN1          |
| YDR484W                                          | VPS52         | YJL095W                 | BCK1          |
| YDR004W                                          | RAD57         | YNL297C                 | MON2          |
| YML095C                                          | RAD10         | YOR368W                 | RAD17         |
| YDL083C                                          | RPS16B        | YOR327C                 | SNC2          |
| YLR386W                                          | VAC14         | YJL183W                 | MNN11         |
| YDR146C                                          | SWI5          | YPR111W                 | DBF20         |
| YNR032W                                          | PPG1          | YAL002W                 | VPS8          |
| YHR039C-A                                        | VMA10         | YEL060C                 | PRB1          |
| YKL139W                                          | CTK1          | YOL054W                 | PSH1          |
| YGL163C                                          | RAD54         | YGR188C                 | BUB1          |
| YBR194W                                          | SOY1          | YPR046W                 | MCM16         |
| YMR172W                                          | HOT1          | YDR183W                 | PLP1          |
| YPL024W                                          | RMI1          | YMR152W                 | YIM1          |
| YKL139W                                          | CTK1          | YML006C                 | GIS4          |
| YLR192C                                          | HCR1          | YNR072W                 | HXT17         |
| YMR026C                                          | PEX12         | YPL037C                 | EGD1          |
| YNL243W                                          | SLA2          | YKL113C                 | RAD27         |
| YDR507C                                          | GIN4          | YNL229C                 | URE2          |
| YDL116W                                          | NUP84         | YJL124C                 | LSM1          |
| YFR040W                                          | SAP155        | YMR109W                 | MYO5          |
| YOR327C                                          | SNC2          | YER040W                 | GLN3          |
| YNR052C                                          | POP2          | YPL152W                 | RRD2          |
| YNL079C                                          | TPM1          | YOR014W                 | RTS1          |
| YCL001W                                          | RER1          | YKR020W                 | VPS51         |
| YLR429W                                          | CRN1          | YDL047W                 | SIT4          |
| YGL200C                                          | EMP24         | YNL041C                 | COG6          |
| YER116C                                          | SLX8          | YDR335W                 | MSN5          |
| YGL147C                                          | RPL9A         | YMR152W                 | YIM1          |

| Predictions at threshold level 0.80 continued... |               |                         |               |
|--------------------------------------------------|---------------|-------------------------|---------------|
| Gene1 of predicted pair                          |               | Gene2 of predicted pair |               |
| Systematic Name                                  | Standard Name | Systematic Name         | Standard Name |
| YPR120C                                          | CLB5          | YJL095W                 | BCK1          |
| YJL183W                                          | MNN11         | YFL048C                 | EMP47         |
| YML013W                                          | UBX2          | YKR001C                 | VPS1          |
| YER122C                                          | GLO3          | YMR230W                 | RPS10B        |
| YBR057C                                          | MUM2          | YOL054W                 | PSH1          |
| YLR079W                                          | SIC1          | YPL178W                 | CBC2          |
| YER115C                                          | SPR6          | YFL047W                 | RGD2          |
| YOR270C                                          | VPH1          | YNL076W                 | MKS1          |
| YNL307C                                          | MCK1          | YML112W                 | CTK3          |
| YPL115C                                          | BEM3          | YGR108W                 | CLB1          |
| YCR066W                                          | RAD18         | YLR309C                 | IMH1          |
| YGL003C                                          | CDH1          | YBR280C                 | SAF1          |
| YDR293C                                          | SSD1          | YDL056W                 | MBP1          |
| YMR068W                                          | AVO2          | YBR270C                 | BIT2          |
| YDR144C                                          | MKC7          | YDR318W                 | MCM21         |
| YCR038C                                          | BUD5          | YPR122W                 | AXL1          |
| YJL124C                                          | LSM1          | YGL115W                 | SNF4          |
| YHR178W                                          | STB5          | YJL124C                 | LSM1          |
| YIL103W                                          | DPH1          | YGL252C                 | RTG2          |
| YDR293C                                          | SSD1          | YJL036W                 | SNX4          |
| YOL018C                                          | TLG2          | YAL002W                 | VPS8          |
| YJL172W                                          | CPS1          | YLR370C                 | ARC18         |
| YJR090C                                          | GRR1          | YDR207C                 | UME6          |
| YIL113W                                          | SDP1          | YOR208W                 | PTP2          |
| YBR273C                                          | UBX7          | YPR119W                 | CLB2          |
| YPR036W                                          | VMA13         | YMR133W                 | REC114        |
| YPL024W                                          | RMI1          | YPL137C                 | GIP3          |
| YMR199W                                          | CLN1          | YOR014W                 | RTS1          |
| YGR108W                                          | CLB1          | YMR198W                 | CIK1          |

| Predictions at threshold level 0.80 continued... |               |                         |               |
|--------------------------------------------------|---------------|-------------------------|---------------|
| Gene1 of predicted pair                          |               | Gene2 of predicted pair |               |
| Systematic Name                                  | Standard Name | Systematic Name         | Standard Name |
| YDR176W                                          | NGG1          | YGR252W                 | GCN5          |
| YDR293C                                          | SSD1          | YDR254W                 | CHL4          |
| YLR386W                                          | VAC14         | YEL056W                 | HAT2          |
| YOR043W                                          | WHI2          | YDR207C                 | UME6          |
| YPL129W                                          | TAF14         | YBR009C                 | HHF1          |
| YCL037C                                          | SRO9          | YCR077C                 | PAT1          |
| YLR119W                                          | SRN2          | YFR010W                 | UBP6          |
| YDR156W                                          | RPA14         | YLR234W                 | TOP3          |
| YDR245W                                          | MNN10         | YBL101C                 | ECM21         |
| YPL234C                                          | TFP3          | YPL195W                 | APL5          |
| YDR293C                                          | SSD1          | YKR001C                 | VPS1          |
| YNL264C                                          | PDR17         | YMR089C                 | YTA12         |
| YHR178W                                          | STB5          | YBR278W                 | DPB3          |
| YBL047C                                          | EDE1          | YGR135W                 | PRE9          |
| YLR192C                                          | HCR1          | YEL060C                 | PRB1          |
| YAL024C                                          | LTE1          | YPL161C                 | BEM4          |
| YPR018W                                          | RLF2          | YPL253C                 | VIK1          |
| YPR131C                                          | NAT3          | YLR288C                 | MEC3          |
| YJR140C                                          | HIR3          | YLR135W                 | SLX4          |
| YNL288W                                          | CAF40         | YJR135C                 | MCM22         |
| YPR052C                                          | NHP6A         | YGR252W                 | GCN5          |
| YGR184C                                          | UBR1          | YKL101W                 | HSL1          |
| YCL037C                                          | SRO9          | YDL192W                 | ARF1          |
| YCR086W                                          | CSM1          | YOL090W                 | MSH2          |
| YGL115W                                          | SNF4          | YOL018C                 | TLG2          |
| YMR055C                                          | BUB2          | YOL067C                 | RTG1          |
| YLR360W                                          | VPS38         | YCL037C                 | SRO9          |
| YDL155W                                          | CLB3          | YLR032W                 | RAD5          |
| YKL006W                                          | RPL14A        | YDL155W                 | CLB3          |

| Predictions at threshold level 0.80 continued... |               |                         |               |
|--------------------------------------------------|---------------|-------------------------|---------------|
| Gene1 of predicted pair                          |               | Gene2 of predicted pair |               |
| Systematic Name                                  | Standard Name | Systematic Name         | Standard Name |
| YGR054W                                          | YGR054W       | YPR046W                 | MCM16         |
| YLR371W                                          | ROM2          | YBR280C                 | SAF1          |
| YLR035C                                          | MLH2          | YMR167W                 | MLH1          |
| YGL078C                                          | DBP3          | YMR311C                 | GLC8          |
| YNL145W                                          | MFA2          | YCR077C                 | PAT1          |
| YPR030W                                          | CSR2          | YDR310C                 | SUM1          |
| YJR040W                                          | GEF1          | YER162C                 | RAD4          |
| YMR039C                                          | SUB1          | YDL185W                 | TFP1          |
| YPR017C                                          | DSS4          | YAR014C                 | BUD14         |
| YDL192W                                          | ARF1          | YMR214W                 | SCJ1          |
| YLR337C                                          | VRP1          | YDR318W                 | MCM21         |
| YLR095C                                          | IOC2          | YMR133W                 | REC114        |
| YDR101C                                          | ARX1          | YHR052W                 | CIC1          |
| YML109W                                          | ZDS2          | YPR119W                 | CLB2          |
| YHR039C-A                                        | VMA10         | YOL018C                 | TLG2          |
| YBL021C                                          | HAP3          | YAL002W                 | VPS8          |
| YJR033C                                          | RAV1          | YPR032W                 | SRO7          |
| YDR108W                                          | GSG1          | YOL108C                 | INO4          |
| YNL078W                                          | NIS1          | YCL024W                 | KCC4          |
| YIL036W                                          | CST6          | YKL110C                 | KTI12         |
| YFR031C-A                                        | RPL2A         | YHR039C-A               | VMA10         |
| YFR040W                                          | SAP155        | YJL183W                 | MNN11         |
| YCL037C                                          | SRO9          | YER139C                 | YER139C       |
| YLR371W                                          | ROM2          | YCR053W                 | THR4          |
| YLR090W                                          | XDJ1          | YPR046W                 | MCM16         |
| YIR005W                                          | IST3          | YMR038C                 | CCS1          |
| YFL033C                                          | RIM15         | YKR030W                 | GMH1          |
| YML006C                                          | GIS4          | YJR090C                 | GRR1          |
| YKL116C                                          | PRR1          | YDR358W                 | GGA1          |

| Predictions at threshold level 0.80 continued... |               |                         |               |
|--------------------------------------------------|---------------|-------------------------|---------------|
| Gene1 of predicted pair                          |               | Gene2 of predicted pair |               |
| Systematic Name                                  | Standard Name | Systematic Name         | Standard Name |
| YBR171W                                          | SEC66         | YJL190C                 | RPS22A        |
| YDR443C                                          | SSN2          | YDL077C                 | VAM6          |
| YOR066W                                          | MSA1          | YDL192W                 | ARF1          |
| YHR156C                                          | LIN1          | YJL095W                 | BCK1          |
| YNL297C                                          | MON2          | YJL004C                 | SYS1          |
| YKR072C                                          | SIS2          | YER161C                 | SPT2          |
| YBR108W                                          | YBR108W       | YER040W                 | GLN3          |
| YDR004W                                          | RAD57         | YPL256C                 | CLN2          |
| YLR083C                                          | EMP70         | YDR293C                 | SSD1          |
| YGL147C                                          | RPL9A         | YCR053W                 | THR4          |
| YIL076W                                          | SEC28         | YDR484W                 | VPS52         |
| YMR172W                                          | HOT1          | YGL124C                 | MON1          |
| YGL200C                                          | EMP24         | YOR312C                 | RPL20B        |
| YFR024C-A                                        | LSB3          | YHR016C                 | YSC84         |
| YLR306W                                          | UBC12         | YDR139C                 | RUB1          |
| YLR216C                                          | CPR6          | YMR055C                 | BUB2          |
| YNL297C                                          | MON2          | YKR030W                 | GMH1          |
| YGL033W                                          | HOP2          | YHR200W                 | RPN10         |
| YNL215W                                          | IES2          | YKL213C                 | DOA1          |
| YKL101W                                          | HSL1          | YLR032W                 | RAD5          |
| YMR216C                                          | SKY1          | YPL195W                 | APL5          |
| YIL036W                                          | CST6          | YDR318W                 | MCM21         |
| YDR176W                                          | NGG1          | YGL066W                 | SGF73         |
| YNL025C                                          | SSN8          | YDR289C                 | RTT103        |
| YOR023C                                          | AHC1          | YAR014C                 | BUD14         |
| YDL059C                                          | RAD59         | YLR182W                 | SWI6          |
| YML115C                                          | VAN1          | YOR066W                 | MSA1          |
| YPL253C                                          | VIK1          | YNL236W                 | SIN4          |
| YNL206C                                          | RTT106        | YLR381W                 | CTF3          |

| Predictions at threshold level 0.80 continued... |               |                         |               |
|--------------------------------------------------|---------------|-------------------------|---------------|
| Gene1 of predicted pair                          |               | Gene2 of predicted pair |               |
| Systematic Name                                  | Standard Name | Systematic Name         | Standard Name |
| YFL023W                                          | BUD27         | YHR010W                 | RPL27A        |
| YMR116C                                          | ASC1          | YDL006W                 | PTC1          |
| YNL291C                                          | MID1          | YDR254W                 | CHL4          |
| YNL243W                                          | SLA2          | YDR388W                 | RVS167        |
| YLR090W                                          | XDJ1          | YHR039C-A               | VMA10         |
| YLR360W                                          | VPS38         | YNL297C                 | MON2          |
| YNL206C                                          | RTT106        | YML095C                 | RAD10         |
| YDL184C                                          | RPL41A        | YMR214W                 | SCJ1          |
| YPL129W                                          | TAF14         | YPR072W                 | NOT5          |
| YOR308C                                          | SNU66         | YLR350W                 | ORM2          |
| YFL013C                                          | IES1          | YPL057C                 | SUR1          |
| YJR063W                                          | RPA12         | YKL110C                 | KTI12         |
| YNL307C                                          | MCK1          | YGL252C                 | RTG2          |
| YBR200W                                          | BEM1          | YIR005W                 | IST3          |
| YAL024C                                          | LTE1          | YKR099W                 | BAS1          |
| YMR055C                                          | BUB2          | YHR111W                 | UBA4          |
| YEL065W                                          | SIT1          | YHR081W                 | LRP1          |
| YOL030W                                          | GAS5          | YCR086W                 | CSM1          |
| YLR119W                                          | SRN2          | YDR477W                 | SNF1          |
| YER044C-A                                        | MEI4          | YHR086W                 | NAM8          |
| YGL215W                                          | CLG1          | YGR105W                 | VMA21         |
| YOR106W                                          | VAM3          | YBR260C                 | RGD1          |
| YGR217W                                          | CCH1          | YDR245W                 | MNN10         |
| YNL054W                                          | VAC7          | YPL152W                 | RRD2          |
| YER096W                                          | SHC1          | YDR207C                 | UME6          |
| YGL223C                                          | COG1          | YPL234C                 | TFP3          |
| YPL161C                                          | BEM4          | YPR046W                 | MCM16         |
| YOR132W                                          | VPS17         | YDR320C                 | SWA2          |
| YPR101W                                          | SNT309        | YDR378C                 | LSM6          |

| Predictions at threshold level 0.80 continued... |               |                         |               |
|--------------------------------------------------|---------------|-------------------------|---------------|
| Gene1 of predicted pair                          |               | Gene2 of predicted pair |               |
| Systematic Name                                  | Standard Name | Systematic Name         | Standard Name |
| YJL172W                                          | CPS1          | YKL048C                 | ELM1          |
| YGL060W                                          | YBP2          | YJL127C                 | SPT10         |
| YDR318W                                          | MCM21         | YKL101W                 | HSL1          |
| YBL047C                                          | EDE1          | YGL031C                 | RPL24A        |
| YPL234C                                          | TFP3          | YEL051W                 | VMA8          |
| YGR040W                                          | KSS1          | YDR103W                 | STE5          |
| YML103C                                          | NUP188        | YDR183W                 | PLP1          |
| YMR142C                                          | RPL13B        | YJR032W                 | CPR7          |
| YGR135W                                          | PRE9          | YOL081W                 | IRA2          |
| YLR410W                                          | VIP1          | YPL152W                 | RRD2          |
| YPL246C                                          | RBD2          | YGL016W                 | KAP122        |
| YNL068C                                          | FKH2          | YDR379W                 | RGA2          |
| YNL307C                                          | MCK1          | YPL152W                 | RRD2          |
| YAL024C                                          | LTE1          | YGL078C                 | DBP3          |
| YPR046W                                          | MCM16         | YBR036C                 | CSG2          |
| YFR010W                                          | UBP6          | YLR350W                 | ORM2          |
| YPR131C                                          | NAT3          | YBR194W                 | SOY1          |
| YDR146C                                          | SWI5          | YBR274W                 | CHK1          |
| YLR234W                                          | TOP3          | YLR320W                 | MMS22         |
| YMR224C                                          | MRE11         | YCR086W                 | CSM1          |
| YDR156W                                          | RPA14         | YML112W                 | CTK3          |
| YGL237C                                          | HAP2          | YJL095W                 | BCK1          |
| YHR134W                                          | WSS1          | YBR114W                 | RAD16         |
| YKR099W                                          | BAS1          | YER162C                 | RAD4          |
| YMR172W                                          | HOT1          | YPL253C                 | VIK1          |
| YLR192C                                          | HCR1          | YDR484W                 | VPS52         |
| YMR026C                                          | PEX12         | YPR030W                 | CSR2          |
| YML102W                                          | CAC2          | YDR207C                 | UME6          |
| YDR469W                                          | SDC1          | YGR188C                 | BUB1          |



| Predictions at threshold level 0.80 continued... |               |                         |               |
|--------------------------------------------------|---------------|-------------------------|---------------|
| Gene1 of predicted pair                          |               | Gene2 of predicted pair |               |
| Systematic Name                                  | Standard Name | Systematic Name         | Standard Name |
| YLR320W                                          | MMS22         | YEL060C                 | PRB1          |
| YMR142C                                          | RPL13B        | YLR452C                 | SST2          |
| YER118C                                          | SHO1          | YML097C                 | VPS9          |
| YOR290C                                          | SNF2          | YDR071C                 | PAA1          |
| YPL161C                                          | BEM4          | YAL002W                 | VPS8          |
| YOR337W                                          | TEA1          | YMR311C                 | GLC8          |
| YPR046W                                          | MCM16         | YML112W                 | CTK3          |
| YHR108W                                          | GGA2          | YJL140W                 | RPB4          |
| YML016C                                          | PPZ1          | YDL047W                 | SIT4          |
| YPR017C                                          | DSS4          | YNL041C                 | COG6          |
| YFR031C-A                                        | RPL2A         | YBL058W                 | SHP1          |
| YLR192C                                          | HCR1          | YBR030W                 | YBR030W       |
| YOR127W                                          | RGA1          | YJR090C                 | GRR1          |
| YMR172W                                          | HOT1          | YLR447C                 | VMA6          |
| YNL218W                                          | MGS1          | YJR035W                 | RAD26         |
| YIR003W                                          | YIR003W       | YKL213C                 | DOA1          |
| YPL057C                                          | SUR1          | YJR084W                 | CSN12         |
| YDR146C                                          | SWI5          | YBR171W                 | SEC66         |
| YNL248C                                          | RPA49         | YBR107C                 | IML3          |
| YHR161C                                          | YAP1801       | YHR108W                 | GGA2          |
| YDL083C                                          | RPS16B        | YER162C                 | RAD4          |
| YDL184C                                          | RPL41A        | YHR200W                 | RPN10         |
| YBR188C                                          | NTC20         | YGL174W                 | BUD13         |
| YOR290C                                          | SNF2          | YNL030W                 | HHF2          |
| YNL107W                                          | YAF9          | YDR207C                 | UME6          |
| YJR063W                                          | RPA12         | YML112W                 | CTK3          |
| YOR106W                                          | VAM3          | YMR054W                 | STV1          |
| YBR217W                                          | ATG12         | YER116C                 | SLX8          |
| YLR079W                                          | SIC1          | YDL226C                 | GCS1          |

| Predictions at threshold level 0.80 continued... |               |                         |               |
|--------------------------------------------------|---------------|-------------------------|---------------|
| Gene1 of predicted pair                          |               | Gene2 of predicted pair |               |
| Systematic Name                                  | Standard Name | Systematic Name         | Standard Name |
| YBL058W                                          | SHP1          | YDR137W                 | RGP1          |
| YIL076W                                          | SEC28         | YBR019C                 | GAL10         |
| YNL069C                                          | RPL16B        | YNL291C                 | MID1          |
| YHL027W                                          | RIM101        | YPL234C                 | TFP3          |
| YMR311C                                          | GLC8          | YNL076W                 | MKS1          |
| YGL078C                                          | DBP3          | YBL025W                 | RRN10         |
| YGR081C                                          | SLX9          | YDL059C                 | RAD59         |
| YMR016C                                          | SOK2          | YKL126W                 | YPK1          |
| YDR293C                                          | SSD1          | YOL108C                 | INO4          |
| YBL017C                                          | PEP1          | YHR161C                 | YAP1801       |
| YDL059C                                          | RAD59         | YMR038C                 | CCS1          |
| YGR072W                                          | UPF3          | YOR112W                 | CEX1          |
| YMR039C                                          | SUB1          | YBL008W                 | HIR1          |
| YHR081W                                          | LRP1          | YGL003C                 | CDH1          |
| YAL024C                                          | LTE1          | YHR013C                 | ARD1          |
| YDR225W                                          | HTA1          | YMR284W                 | YKU70         |
| YLR386W                                          | VAC14         | YHR012W                 | VPS29         |
| YCR020C-A                                        | MAK31         | YML038C                 | YMD8          |
| YNL238W                                          | KEX2          | YPR032W                 | SRO7          |
| YNL329C                                          | PEX6          | YKR020W                 | VPS51         |
| YBR171W                                          | SEC66         | YAR014C                 | BUD14         |
| YNL206C                                          | RTT106        | YJL095W                 | BCK1          |
| YIL159W                                          | BNR1          | YGL078C                 | DBP3          |
| YML095C                                          | RAD10         | YGR270W                 | YTA7          |
| YFL013C                                          | IES1          | YOR038C                 | HIR2          |
| YFL023W                                          | BUD27         | YGL003C                 | CDH1          |
| YMR216C                                          | SKY1          | YMR054W                 | STV1          |
| YLR079W                                          | SIC1          | YLR386W                 | VAC14         |
| YLR090W                                          | XDJ1          | YLR192C                 | HCR1          |

| Predictions at threshold level 0.80 continued... |               |                         |               |
|--------------------------------------------------|---------------|-------------------------|---------------|
| Gene1 of predicted pair                          |               | Gene2 of predicted pair |               |
| Systematic Name                                  | Standard Name | Systematic Name         | Standard Name |
| YNL215W                                          | IES2          | YPL180W                 | TCO89         |
| YOR290C                                          | SNF2          | YFL023W                 | BUD27         |
| YOR080W                                          | DIA2          | YMR202W                 | ERG2          |
| YOL018C                                          | TLG2          | YKL119C                 | VPH2          |
| YDR363W-A                                        | SEM1          | YAR014C                 | BUD14         |
| YNL044W                                          | YIP3          | YGR105W                 | VMA21         |
| YJR056C                                          | YJR056C       | YCR053W                 | THR4          |
| YHR013C                                          | ARD1          | YMR089C                 | YTA12         |
| YPL195W                                          | APL5          | YOL018C                 | TLG2          |
| YIL076W                                          | SEC28         | YGL174W                 | BUD13         |
| YML001W                                          | YPT7          | YER162C                 | RAD4          |
| YLL039C                                          | UBI4          | YNR006W                 | VPS27         |
| YLR447C                                          | VMA6          | YIL008W                 | URM1          |
| YOR270C                                          | VPH1          | YKR035W-A               | DID2          |
| YGL033W                                          | HOP2          | YBR036C                 | CSG2          |
| YPL024W                                          | RMI1          | YNL307C                 | MCK1          |
| YDR146C                                          | SWI5          | YOR368W                 | RAD17         |
| YPL042C                                          | SSN3          | YOR124C                 | UBP2          |
| YNL054W                                          | VAC7          | YNL225C                 | CNM67         |
| YAL020C                                          | ATS1          | YNL116W                 | DMA2          |
| YLR216C                                          | CPR6          | YDR254W                 | CHL4          |
| YGL033W                                          | HOP2          | YDL223C                 | HBT1          |
| YFR024C-A                                        | LSB3          | YLR144C                 | ACF2          |
| YPL024W                                          | RMI1          | YJR135C                 | MCM22         |
| YOR109W                                          | INP53         | YPL234C                 | TFP3          |
| YML103C                                          | NUP188        | YDR318W                 | MCM21         |
| YMR026C                                          | PEX12         | YML001W                 | YPT7          |
| YNL297C                                          | MON2          | YJR060W                 | CBF1          |
| YMR026C                                          | PEX12         | YNR072W                 | HXT17         |

| Predictions at threshold level 0.80 continued... |               |                         |               |
|--------------------------------------------------|---------------|-------------------------|---------------|
| Gene1 of predicted pair                          |               | Gene2 of predicted pair |               |
| Systematic Name                                  | Standard Name | Systematic Name         | Standard Name |
| YMR055C                                          | BUB2          | YGL151W                 | NUT1          |
| YPR017C                                          | DSS4          | YNL293W                 | MSB3          |
| YDR129C                                          | SAC6          | YJL006C                 | CTK2          |
| YML115C                                          | VAN1          | YBR280C                 | SAF1          |
| YPL096C-A                                        | ERI1          | YBL007C                 | SLA1          |
| YMR153W                                          | NUP53         | YPL037C                 | EGD1          |
| YMR224C                                          | MRE11         | YGL066W                 | SGF73         |
| YMR153W                                          | NUP53         | YGL025C                 | PGD1          |
| YPL024W                                          | RMI1          | YDR289C                 | RTT103        |
| YDL155W                                          | CLB3          | YDR318W                 | MCM21         |
| YPL253C                                          | VIK1          | YBR171W                 | SEC66         |
| YML071C                                          | COG8          | YDR310C                 | SUM1          |
| YGL087C                                          | MMS2          | YBL051C                 | PIN4          |
| YLR064W                                          | YLR064W       | YKR030W                 | GMH1          |
| YDR108W                                          | GSG1          | YBR036C                 | CSG2          |
| YDL116W                                          | NUP84         | YDL155W                 | CLB3          |
| YDR004W                                          | RAD57         | YCR077C                 | PAT1          |
| YDL020C                                          | RPN4          | YOR368W                 | RAD17         |
| YAL024C                                          | LTE1          | YLR386W                 | VAC14         |
| YMR216C                                          | SKY1          | YLR309C                 | IMH1          |
| YMR109W                                          | MYO5          | YOR358W                 | HAP5          |
| YIL036W                                          | CST6          | YBR107C                 | IML3          |
| YLR337C                                          | VRP1          | YDR293C                 | SSD1          |
| YDR004W                                          | RAD57         | YBR274W                 | CHK1          |
| YDR293C                                          | SSD1          | YGL003C                 | CDH1          |
| YDR171W                                          | HSP42         | YJR035W                 | RAD26         |
| YBL078C                                          | ATG8          | YGL212W                 | VAM7          |
| YOR358W                                          | HAP5          | YPL018W                 | CTF19         |
| YKR072C                                          | SIS2          | YDR076W                 | RAD55         |

| Predictions at threshold level 0.80 continued... |               |                         |               |
|--------------------------------------------------|---------------|-------------------------|---------------|
| Gene1 of predicted pair                          |               | Gene2 of predicted pair |               |
| Systematic Name                                  | Standard Name | Systematic Name         | Standard Name |
| YPL042C                                          | SSN3          | YDL005C                 | MED2          |
| YCR031C                                          | RPS14A        | YOL081W                 | IRA2          |
| YML103C                                          | NUP188        | YMR164C                 | MSS11         |
| YHR012W                                          | VPS29         | YHR114W                 | BZZ1          |
| YEL065W                                          | SIT1          | YHR156C                 | LIN1          |
| YGL133W                                          | ITC1          | YJL095W                 | BCK1          |
| YLR170C                                          | APS1          | YOR109W                 | INP53         |
| YLR441C                                          | RPS1A         | YDR207C                 | UME6          |
| YPL129W                                          | TAF14         | YJR140C                 | HIR3          |
| YFR030W                                          | MET10         | YLR254C                 | NDL1          |
| YBR057C                                          | MUM2          | YDL223C                 | HBT1          |
| YNL166C                                          | BNI5          | YJL190C                 | RPS22A        |
| YJR084W                                          | CSN12         | YNL076W                 | MKS1          |
| YNL199C                                          | GCR2          | YPL256C                 | CLN2          |
| YMR284W                                          | YKU70         | YCR066W                 | RAD18         |
| YPL240C                                          | HSP82         | YEL022W                 | GEA2          |
| YJL154C                                          | VPS35         | YDR245W                 | MNN10         |
| YNL069C                                          | RPL16B        | YDR207C                 | UME6          |
| YMR198W                                          | CIK1          | YDR378C                 | LSM6          |
| YBR073W                                          | RDH54         | YDL013W                 | SLX5          |
| YDR129C                                          | SAC6          | YMR198W                 | CIK1          |
| YPR051W                                          | MAK3          | YPL018W                 | CTF19         |
| YLR360W                                          | VPS38         | YBR108W                 | YBR108W       |
| YJL151C                                          | SNA3          | YLR064W                 | YLR064W       |
| YOR270C                                          | VPH1          | YPL234C                 | TFP3          |
| YER144C                                          | UBP5          | YER040W                 | GLN3          |
| YGR054W                                          | YGR054W       | YPR163C                 | TIF3          |
| YNL307C                                          | MCK1          | YLR452C                 | SST2          |
| YLR102C                                          | APC9          | YPL256C                 | CLN2          |

| Predictions at threshold level 0.80 continued... |               |                         |               |
|--------------------------------------------------|---------------|-------------------------|---------------|
| Gene1 of predicted pair                          |               | Gene2 of predicted pair |               |
| Systematic Name                                  | Standard Name | Systematic Name         | Standard Name |
| YPL037C                                          | EGD1          | YDL083C                 | RPS16B        |
| YIL076W                                          | SEC28         | YOR066W                 | MSA1          |
| YPR052C                                          | NHP6A         | YLR357W                 | RSC2          |
| YBR215W                                          | HPC2          | YAL002W                 | VPS8          |
| YDR293C                                          | SSD1          | YHR178W                 | STB5          |
| YOR043W                                          | WHI2          | YCR086W                 | CSM1          |
| YGL223C                                          | COG1          | YDR153C                 | ENT5          |
| YLR119W                                          | SRN2          | YFL023W                 | BUD27         |
| YDL155W                                          | CLB3          | YHL002W                 | HSE1          |
| YBL102W                                          | SFT2          | YPL120W                 | VPS30         |
| YFR032C-A                                        | RPL29         | YJL117W                 | PHO86         |
| YDL077C                                          | VAM6          | YNL076W                 | MKS1          |
| YNL069C                                          | RPL16B        | YML001W                 | YPT7          |
| YLR386W                                          | VAC14         | YMR055C                 | BUB2          |
| YKL025C                                          | PAN3          | YBR108W                 | YBR108W       |
| YPR017C                                          | DSS4          | YDL006W                 | PTC1          |
| YOR275C                                          | RIM20         | YHR158C                 | KEL1          |
| YFL023W                                          | BUD27         | YEL060C                 | PRB1          |
| YLR313C                                          | SPH1          | YJR035W                 | RAD26         |
| YHR161C                                          | YAP1801       | YJR125C                 | ENT3          |
| YDR174W                                          | HMO1          | YIL103W                 | DPH1          |
| YGR261C                                          | APL6          | YNL297C                 | MON2          |
| YGL212W                                          | VAM7          | YJL095W                 | BCK1          |
| YML016C                                          | PPZ1          | YJL006C                 | CTK2          |
| YPL057C                                          | SUR1          | YDL192W                 | ARF1          |
| YJL172W                                          | CPS1          | YLR452C                 | SST2          |
| YBR009C                                          | HHF1          | YDR440W                 | DOT1          |
| YLR234W                                          | TOP3          | YBR215W                 | HPC2          |
| YBR200W                                          | BEM1          | YKL110C                 | KTI12         |

| Predictions at threshold level 0.80 continued... |               |                         |               |
|--------------------------------------------------|---------------|-------------------------|---------------|
| Gene1 of predicted pair                          |               | Gene2 of predicted pair |               |
| Systematic Name                                  | Standard Name | Systematic Name         | Standard Name |
| YOL111C                                          | MDY2          | YDL192W                 | ARF1          |
| YPL253C                                          | VIK1          | YNL079C                 | TPM1          |
| YML071C                                          | COG8          | YDL077C                 | VAM6          |
| YDR443C                                          | SSN2          | YOR337W                 | TEA1          |
| YKR072C                                          | SIS2          | YLR352W                 | YLR352W       |
| YBR171W                                          | SEC66         | YOL111C                 | MDY2          |
| YMR026C                                          | PEX12         | YBR030W                 | YBR030W       |
| YHR149C                                          | SKG6          | YPL240C                 | HSP82         |
| YFR031C-A                                        | RPL2A         | YGR020C                 | VMA7          |
| YDR293C                                          | SSD1          | YDL155W                 | CLB3          |
| YKL126W                                          | YPK1          | YJR056C                 | YJR056C       |
| YDR363W-A                                        | SEM1          | YML097C                 | VPS9          |
| YPR084W                                          | YPR084W       | YPL161C                 | BEM4          |
| YKR035W-A                                        | DID2          | YPL161C                 | BEM4          |
| YPL161C                                          | BEM4          | YKR020W                 | VPS51         |
| YFL023W                                          | BUD27         | YGL115W                 | SNF4          |
| YKL006W                                          | RPL14A        | YDR245W                 | MNN10         |
| YJL095W                                          | BCK1          | YNL116W                 | DMA2          |
| YLR371W                                          | ROM2          | YBL025W                 | RRN10         |
| YML115C                                          | VAN1          | YJL117W                 | PHO86         |
| YPR120C                                          | CLB5          | YCR086W                 | CSM1          |
| YNL248C                                          | RPA49         | YLR182W                 | SWI6          |
| YLR360W                                          | VPS38         | YMR109W                 | MYO5          |
| YJR056C                                          | YJR056C       | YNL307C                 | MCK1          |
| YNL041C                                          | COG6          | YPL137C                 | GIP3          |
| YDL155W                                          | CLB3          | YJR090C                 | GRR1          |
| YNL044W                                          | YIP3          | YPR028W                 | YOP1          |
| YNL248C                                          | RPA49         | YGL163C                 | RAD54         |
| YLR371W                                          | ROM2          | YDL077C                 | VAM6          |

| Predictions at threshold level 0.80 continued... |               |                         |               |
|--------------------------------------------------|---------------|-------------------------|---------------|
| Gene1 of predicted pair                          |               | Gene2 of predicted pair |               |
| Systematic Name                                  | Standard Name | Systematic Name         | Standard Name |
| YNR052C                                          | POP2          | YDR335W                 | MSN5          |
| YER120W                                          | SCS2          | YPL195W                 | APL5          |
| YPL024W                                          | RMI1          | YOR195W                 | SLK19         |
| YJL183W                                          | MNN11         | YOL081W                 | IRA2          |
| YBR200W                                          | BEM1          | YNL293W                 | MSB3          |
| YGL237C                                          | HAP2          | YDR155C                 | CPR1          |
| YLL039C                                          | UBI4          | YKL041W                 | VPS24         |
| YJR084W                                          | CSN12         | YOL081W                 | IRA2          |
| YMR116C                                          | ASC1          | YBL101C                 | ECM21         |
| YPL037C                                          | EGD1          | YDR310C                 | SUM1          |
| YPR036W                                          | VMA13         | YMR054W                 | STV1          |
| YGR108W                                          | CLB1          | YEL053C                 | MAK10         |
| YDR156W                                          | RPA14         | YNL116W                 | DMA2          |
| YBR215W                                          | HPC2          | YJR135C                 | MCM22         |
| YLR095C                                          | IOC2          | YKL116C                 | PRR1          |
| YKR072C                                          | SIS2          | YER116C                 | SLX8          |
| YGL115W                                          | SNF4          | YML001W                 | YPT7          |
| YPR030W                                          | CSR2          | YOR035C                 | SHE4          |
| YBR107C                                          | IML3          | YPR120C                 | CLB5          |
| YNL186W                                          | UBP10         | YPR119W                 | CLB2          |
| YDR144C                                          | MKC7          | YEL056W                 | HAT2          |
| YBR171W                                          | SEC66         | YOR043W                 | WHI2          |
| YGL066W                                          | SGF73         | YMR055C                 | BUB2          |
| YDL223C                                          | HBT1          | YML001W                 | YPT7          |
| YGL124C                                          | MON1          | YOL081W                 | IRA2          |
| YDL020C                                          | RPN4          | YMR055C                 | BUB2          |
| YDR137W                                          | RGP1          | YGR188C                 | BUB1          |
| YNL215W                                          | IES2          | YDR146C                 | SWI5          |
| YJL036W                                          | SNX4          | YPR051W                 | MAK3          |



| Predictions at threshold level 0.80 continued... |               |                         |               |
|--------------------------------------------------|---------------|-------------------------|---------------|
| Gene1 of predicted pair                          |               | Gene2 of predicted pair |               |
| Systematic Name                                  | Standard Name | Systematic Name         | Standard Name |
| YOR080W                                          | DIA2          | YDR254W                 | CHL4          |
| YDR378C                                          | LSM6          | YDR289C                 | RTT103        |
| YLL039C                                          | UBI4          | YDL155W                 | CLB3          |
| YLR360W                                          | VPS38         | YCR088W                 | ABP1          |
| YNL094W                                          | APP1          | YCR088W                 | ABP1          |
| YNL215W                                          | IES2          | YKL041W                 | VPS24         |
| YER116C                                          | SLX8          | YOR368W                 | RAD17         |
| YDL013W                                          | SLX5          | YJL187C                 | SWE1          |
| YKR072C                                          | SIS2          | YLR135W                 | SLX4          |
| YGR249W                                          | MGA1          | YOR327C                 | SNC2          |
| YJL095W                                          | BCK1          | YMR089C                 | YTA12         |
| YNL243W                                          | SLA2          | YML062C                 | MFT1          |
| YMR109W                                          | MYO5          | YDR183W                 | PLP1          |
| YDR265W                                          | PEX10         | YOL044W                 | PEX15         |
| YMR202W                                          | ERG2          | YOR327C                 | SNC2          |
| YLR441C                                          | RPS1A         | YOL081W                 | IRA2          |
| YDR156W                                          | RPA14         | YNL225C                 | CNM67         |
| YNL025C                                          | SSN8          | YDR477W                 | SNF1          |
| YER087C-B                                        | SBH1          | YML019W                 | OST6          |
| YLR288C                                          | MEC3          | YPL256C                 | CLN2          |
| YOR033C                                          | EXO1          | YGL100W                 | SEH1          |
| YBL058W                                          | SHP1          | YMR152W                 | YIM1          |
| YCR066W                                          | RAD18         | YKR020W                 | VPS51         |
| YOR290C                                          | SNF2          | YHR039C-A               | VMA10         |
| YCR086W                                          | CSM1          | YDR155C                 | CPR1          |
| YLR360W                                          | VPS38         | YDR323C                 | PEP7          |
| YOR106W                                          | VAM3          | YGR020C                 | VMA7          |
| YGL003C                                          | CDH1          | YGL124C                 | MON1          |
| YJR140C                                          | HIR3          | YOR043W                 | WHI2          |

| Predictions at threshold level 0.80 continued... |               |                         |               |
|--------------------------------------------------|---------------|-------------------------|---------------|
| Gene1 of predicted pair                          |               | Gene2 of predicted pair |               |
| Systematic Name                                  | Standard Name | Systematic Name         | Standard Name |
| YLR135W                                          | SLX4          | YPL079W                 | RPL21B        |
| YOR112W                                          | CEX1          | YJL036W                 | SNX4          |
| YNL238W                                          | KEX2          | YNL051W                 | COG5          |
| YHR178W                                          | STB5          | YOR368W                 | RAD17         |
| YKL139W                                          | CTK1          | YKR030W                 | GMH1          |
| YNL106C                                          | INP52         | YNL307C                 | MCK1          |
| YLR386W                                          | VAC14         | YNL248C                 | RPA49         |
| YDR383C                                          | NKP1          | YML103C                 | NUP188        |
| YBR215W                                          | HPC2          | YMR038C                 | CCS1          |
| YBL103C                                          | RTG3          | YHR081W                 | LRP1          |
| YEL053C                                          | MAK10         | YER120W                 | SCS2          |
| YLR079W                                          | SIC1          | YKL048C                 | ELM1          |
| YCL037C                                          | SRO9          | YDR440W                 | DOT1          |
| YBR289W                                          | SNF5          | YOR038C                 | HIR2          |
| YPR051W                                          | MAK3          | YMR109W                 | MYO5          |
| YLR399C                                          | BDF1          | YDR254W                 | CHL4          |
| YFR031C-A                                        | RPL2A         | YJL053W                 | PEP8          |
| YER144C                                          | UBP5          | YHR060W                 | VMA22         |
| YBL102W                                          | SFT2          | YGR020C                 | VMA7          |
| YJL095W                                          | BCK1          | YMR214W                 | SCJ1          |
| YJR040W                                          | GEF1          | YEL051W                 | VMA8          |
| YLR119W                                          | SRN2          | YBR200W                 | BEM1          |
| YPR030W                                          | CSR2          | YBL025W                 | RRN10         |
| YGR108W                                          | CLB1          | YAL002W                 | VPS8          |
| YMR055C                                          | BUB2          | YDR363W-A               | SEM1          |
| YLL007C                                          | YLL007C       | YLR447C                 | VMA6          |
| YOR358W                                          | HAP5          | YGR054W                 | YGR054W       |
| YBR108W                                          | YBR108W       | YNL058C                 | YNL058C       |
| YBR171W                                          | SEC66         | YNL166C                 | BNI5          |

| Predictions at threshold level 0.80 continued... |               |                         |               |
|--------------------------------------------------|---------------|-------------------------|---------------|
| Gene1 of predicted pair                          |               | Gene2 of predicted pair |               |
| Systematic Name                                  | Standard Name | Systematic Name         | Standard Name |
| YBR057C                                          | MUM2          | YML028W                 | TSA1          |
| YCR066W                                          | RAD18         | YGL054C                 | ERV14         |
| YOR083W                                          | WHI5          | YPL018W                 | CTF19         |
| YOR195W                                          | SLK19         | YNR052C                 | POP2          |
| YLR090W                                          | XDJ1          | YNL325C                 | FIG4          |
| YLR135W                                          | SLX4          | YGL031C                 | RPL24A        |
| YMR224C                                          | MRE11         | YKL032C                 | IXR1          |
| YLR234W                                          | TOP3          | YHL002W                 | HSE1          |
| YMR116C                                          | ASC1          | YGR135W                 | PRE9          |
| YPL180W                                          | TCO89         | YDR363W-A               | SEM1          |
| YML071C                                          | COG8          | YMR230W                 | RPS10B        |
| YOR127W                                          | RGA1          | YNL238W                 | KEX2          |
| YDR484W                                          | VPS52         | YOL121C                 | RPS19A        |
| YDL020C                                          | RPN4          | YGL003C                 | CDH1          |
| YHL020C                                          | OPI1          | YDR153C                 | ENT5          |
| YDR225W                                          | HTA1          | YNL291C                 | MID1          |
| YJR084W                                          | CSN12         | YBR280C                 | SAF1          |
| YLL007C                                          | YLL007C       | YJL183W                 | MNN11         |
| YKL007W                                          | CAP1          | YGR152C                 | RSR1          |
| YNL248C                                          | RPA49         | YNL225C                 | CNM67         |
| YJL154C                                          | VPS35         | YEL053C                 | MAK10         |
| YKL010C                                          | UFD4          | YBL101C                 | ECM21         |
| YDR443C                                          | SSN2          | YNL079C                 | TPM1          |
| YLR094C                                          | GIS3          | YJL183W                 | MNN11         |
| YBR041W                                          | FAT1          | YKR046C                 | PET10         |
| YLR381W                                          | CTF3          | YBR215W                 | HPC2          |
| YBR107C                                          | IML3          | YOL067C                 | RTG1          |
| YMR199W                                          | CLN1          | YOL081W                 | IRA2          |
| YKL007W                                          | CAP1          | YKL204W                 | EAP1          |

| Predictions at threshold level 0.80 continued... |               |                         |               |
|--------------------------------------------------|---------------|-------------------------|---------------|
| Gene1 of predicted pair                          |               | Gene2 of predicted pair |               |
| Systematic Name                                  | Standard Name | Systematic Name         | Standard Name |
| YNR058W                                          | BIO3          | YJR025C                 | BNA1          |
| YMR199W                                          | CLN1          | YMR038C                 | CCS1          |
| YBR171W                                          | SEC66         | YBR280C                 | SAF1          |
| YDL002C                                          | NHP10         | YOR141C                 | ARP8          |
| YPL105C                                          | YPL105C       | YML071C                 | COG8          |
| YER110C                                          | KAP123        | YNL107W                 | YAF9          |
| YEL065W                                          | SIT1          | YDL077C                 | VAM6          |
| YLR410W                                          | VIP1          | YLR315W                 | NKP2          |
| YBR107C                                          | IML3          | YGR135W                 | PRE9          |
| YBL008W                                          | HIR1          | YKL101W                 | HSL1          |
| YGL033W                                          | HOP2          | YJL172W                 | CPS1          |
| YCL037C                                          | SRO9          | YDR289C                 | RTT103        |
| YDL020C                                          | RPN4          | YML102W                 | CAC2          |
| YBR273C                                          | UBX7          | YJL048C                 | UBX6          |
| YLL039C                                          | UBI4          | YBL047C                 | EDE1          |
| YLR119W                                          | SRN2          | YBR030W                 | YBR030W       |
| YER116C                                          | SLX8          | YDL192W                 | ARF1          |
| YJL176C                                          | SWI3          | YOR290C                 | SNF2          |
| YFL023W                                          | BUD27         | YDR076W                 | RAD55         |
| YER087C-B                                        | SBH1          | YAR003W                 | SWD1          |
| YNL215W                                          | IES2          | YDR245W                 | MNN10         |
| YIL076W                                          | SEC28         | YPL057C                 | SUR1          |
| YIL076W                                          | SEC28         | YOL018C                 | TLG2          |
| YMR133W                                          | REC114        | YER040W                 | GLN3          |
| YNL058C                                          | YNL058C       | YMR311C                 | GLC8          |
| YMR153W                                          | NUP53         | YDR310C                 | SUM1          |
| YDL154W                                          | MSH5          | YMR167W                 | MLH1          |
| YHR056C                                          | RSC30         | YLR357W                 | RSC2          |
| YKL110C                                          | KTI12         | YFR030W                 | MET10         |

| Predictions at threshold level 0.80 continued... |               |                         |               |
|--------------------------------------------------|---------------|-------------------------|---------------|
| Gene1 of predicted pair                          |               | Gene2 of predicted pair |               |
| Systematic Name                                  | Standard Name | Systematic Name         | Standard Name |
| YFR031C-A                                        | RPL2A         | YLR441C                 | RPS1A         |
| YKR099W                                          | BAS1          | YHR081W                 | LRP1          |
| YDR289C                                          | RTT103        | YNL116W                 | DMA2          |
| YDL020C                                          | RPN4          | YBL021C                 | HAP3          |
| YBR171W                                          | SEC66         | YKR035W-A               | DID2          |
| YLR381W                                          | CTF3          | YJL124C                 | LSM1          |
| YLR337C                                          | VRP1          | YEL056W                 | HAT2          |
| YMR224C                                          | MRE11         | YML001W                 | YPT7          |
| YMR142C                                          | RPL13B        | YGL003C                 | CDH1          |
| YOL121C                                          | RPS19A        | YDL192W                 | ARF1          |
| YPL253C                                          | VIK1          | YGL237C                 | HAP2          |
| YDL020C                                          | RPN4          | YPL057C                 | SUR1          |
| YGL100W                                          | SEH1          | YKL068W                 | NUP100        |
| YGL124C                                          | MON1          | YDR310C                 | SUM1          |
| YKL032C                                          | IXR1          | YBL047C                 | EDE1          |
| YOR001W                                          | RRP6          | YGR270W                 | YTA7          |
| YAL024C                                          | LTE1          | YER116C                 | SLX8          |
| YPR084W                                          | YPR084W       | YNR032W                 | PPG1          |
| YNL307C                                          | MCK1          | YNR072W                 | HXT17         |
| YHR178W                                          | STB5          | YBR108W                 | YBR108W       |
| YNL025C                                          | SSN8          | YDR363W-A               | SEM1          |
| YDR142C                                          | PEX7          | YLL061W                 | MMP1          |
| YMR216C                                          | SKY1          | YHR012W                 | VPS29         |
| YBR057C                                          | MUM2          | YGR184C                 | UBR1          |
| YDR254W                                          | CHL4          | YGR135W                 | PRE9          |
| YDR080W                                          | VPS41         | YNL051W                 | COG5          |
| YJL124C                                          | LSM1          | YDL059C                 | RAD59         |
| YNL051W                                          | COG5          | YEL042W                 | GDA1          |
| YMR095C                                          | SNO1          | YNR072W                 | HXT17         |

| Predictions at threshold level 0.80 continued... |               |                         |               |
|--------------------------------------------------|---------------|-------------------------|---------------|
| Gene1 of predicted pair                          |               | Gene2 of predicted pair |               |
| Systematic Name                                  | Standard Name | Systematic Name         | Standard Name |
| YBR278W                                          | DPB3          | YCR077C                 | PAT1          |
| YPL161C                                          | BEM4          | YDL083C                 | RPS16B        |
| YNR072W                                          | HXT17         | YMR038C                 | CCS1          |
| YNL288W                                          | CAF40         | YPL161C                 | BEM4          |
| YGR217W                                          | CCH1          | YKL048C                 | ELM1          |
| YMR198W                                          | CIK1          | YLR398C                 | SKI2          |
| YMR055C                                          | BUB2          | YPL161C                 | BEM4          |
| YPL089C                                          | RLM1          | YJL183W                 | MNN11         |
| YFR010W                                          | UBP6          | YOL081W                 | IRA2          |
| YBR278W                                          | DPB3          | YBR215W                 | HPC2          |
| YEL036C                                          | ANP1          | YDR207C                 | UME6          |
| YDL223C                                          | HBT1          | YBR019C                 | GAL10         |
| YLR058C                                          | SHM2          | YPL106C                 | SSE1          |
| YJR056C                                          | YJR056C       | YBR171W                 | SEC66         |
| YBL051C                                          | PIN4          | YJL183W                 | MNN11         |
| YJL176C                                          | SWI3          | YPL161C                 | BEM4          |
| YHR073W                                          | OSH3          | YMR273C                 | ZDS1          |
| YBL058W                                          | SHP1          | YBR171W                 | SEC66         |
| YHR060W                                          | VMA22         | YBR036C                 | CSG2          |
| YDR146C                                          | SWI5          | YCR086W                 | CSM1          |
| YGL178W                                          | MPT5          | YGL003C                 | CDH1          |
| YPR084W                                          | YPR084W       | YPR017C                 | DSS4          |
| YNL215W                                          | IES2          | YLR079W                 | SIC1          |
| YGR054W                                          | YGR054W       | YNL107W                 | YAF9          |
| YLR234W                                          | TOP3          | YHR200W                 | RPN10         |
| YGL060W                                          | YBP2          | YNL236W                 | SIN4          |
| YPL037C                                          | EGD1          | YDL006W                 | PTC1          |
| YDR443C                                          | SSN2          | YBR108W                 | YBR108W       |
| YER161C                                          | SPT2          | YBR009C                 | HHF1          |

| Predictions at threshold level 0.80 continued... |               |                         |               |
|--------------------------------------------------|---------------|-------------------------|---------------|
| Gene1 of predicted pair                          |               | Gene2 of predicted pair |               |
| Systematic Name                                  | Standard Name | Systematic Name         | Standard Name |
| YGL019W                                          | CKB1          | YOL081W                 | IRA2          |
| YFR030W                                          | MET10         | YPL018W                 | CTF19         |
| YIL156W                                          | UBP7          | YPL178W                 | CBC2          |
| YDR389W                                          | SAC7          | YBR200W                 | BEM1          |
| YDL080C                                          | THI3          | YMR224C                 | MRE11         |
| YKL126W                                          | YPK1          | YDR207C                 | UME6          |
| YGL190C                                          | CDC55         | YNL271C                 | BNI1          |
| YLR386W                                          | VAC14         | YDL223C                 | HBT1          |
| YGL190C                                          | CDC55         | YGL208W                 | SIP2          |
| YOL111C                                          | MDY2          | YOR035C                 | SHE4          |
| YDR129C                                          | SAC6          | YHL027W                 | RIM101        |
| YDR085C                                          | AFR1          | YBL085W                 | BOI1          |
| YCR081W                                          | SRB8          | YGL025C                 | PGD1          |
| YMR125W                                          | STO1          | YBL079W                 | NUP170        |
| YPR017C                                          | DSS4          | YOL108C                 | INO4          |
| YGL147C                                          | RPL9A         | YLR180W                 | SAM1          |
| YJL154C                                          | VPS35         | YOR069W                 | VPS5          |
| YBR127C                                          | VMA2          | YHR060W                 | VMA22         |
| YJL060W                                          | BNA3          | YPL018W                 | CTF19         |
| YOR337W                                          | TEA1          | YJL183W                 | MNN11         |
| YNL041C                                          | COG6          | YJR135C                 | MCM22         |
| YPL024W                                          | RMI1          | YBR173C                 | UMP1          |
| YMR179W                                          | SPT21         | YGL115W                 | SNF4          |
| YLR083C                                          | EMP70         | YJR040W                 | GEF1          |
| YLL007C                                          | YLL007C       | YDL020C                 | RPN4          |
| YJL124C                                          | LSM1          | YDR363W-A               | SEM1          |
| YIL076W                                          | SEC28         | YDL002C                 | NHP10         |
| YMR095C                                          | SNO1          | YGL115W                 | SNF4          |
| YKR099W                                          | BAS1          | YDL223C                 | HBT1          |

| Predictions at threshold level 0.80 continued... |               |                         |               |
|--------------------------------------------------|---------------|-------------------------|---------------|
| Gene1 of predicted pair                          |               | Gene2 of predicted pair |               |
| Systematic Name                                  | Standard Name | Systematic Name         | Standard Name |
| YPL115C                                          | BEM3          | YBL051C                 | PIN4          |
| YBR111W-A                                        | SUS1          | YDR159W                 | SAC3          |
| YMR116C                                          | ASC1          | YBR041W                 | FAT1          |
| YLR094C                                          | GIS3          | YDL077C                 | VAM6          |
| YDR293C                                          | SSD1          | YML071C                 | COG8          |
| YGR249W                                          | MGA1          | YPL203W                 | TPK2          |
| YJL154C                                          | VPS35         | YMR216C                 | SKY1          |
| YGR072W                                          | UPF3          | YOR106W                 | VAM3          |
| YDL223C                                          | HBT1          | YDL192W                 | ARF1          |
| YLR337C                                          | VRP1          | YLR192C                 | HCR1          |
| YJL154C                                          | VPS35         | YLR309C                 | IMH1          |
| YKL025C                                          | PAN3          | YLR337C                 | VRP1          |
| YOR127W                                          | RGA1          | YKR030W                 | GMH1          |
| YCL001W                                          | RER1          | YPL195W                 | APL5          |
| YBL051C                                          | PIN4          | YHR012W                 | VPS29         |
| YLR095C                                          | IOC2          | YOR035C                 | SHE4          |
| YFR010W                                          | UBP6          | YCR077C                 | PAT1          |
| YKL139W                                          | CTK1          | YFR030W                 | MET10         |
| YMR172W                                          | HOT1          | YPL161C                 | BEM4          |
| YMR224C                                          | MRE11         | YBR030W                 | YBR030W       |
| YML115C                                          | VAN1          | YER116C                 | SLX8          |
| YLR119W                                          | SRN2          | YJL172W                 | CPS1          |
| YER115C                                          | SPR6          | YBL079W                 | NUP170        |
| YDR261C                                          | EXG2          | YGL003C                 | CDH1          |
| YJR060W                                          | CBF1          | YPR032W                 | SRO7          |
| YOR337W                                          | TEA1          | YNL032W                 | SIW14         |
| YMR273C                                          | ZDS1          | YPL246C                 | RBD2          |
| YLR371W                                          | ROM2          | YEL060C                 | PRB1          |
| YFR024C-A                                        | LSB3          | YOR284W                 | HUA2          |



| Predictions at threshold level 0.80 continued... |               |                         |               |
|--------------------------------------------------|---------------|-------------------------|---------------|
| Gene1 of predicted pair                          |               | Gene2 of predicted pair |               |
| Systematic Name                                  | Standard Name | Systematic Name         | Standard Name |
| YHR086W                                          | NAM8          | YJR021C                 | REC107        |
| YIL076W                                          | SEC28         | YPR032W                 | SRO7          |
| YPL195W                                          | APL5          | YDL077C                 | VAM6          |
| YFL066C                                          | YFL066C       | YNL147W                 | LSM7          |
| YDR202C                                          | RAV2          | YOL018C                 | TLG2          |
| YGL003C                                          | CDH1          | YCR053W                 | THR4          |
| YOR156C                                          | NFI1          | YNL107W                 | YAF9          |
| YDR293C                                          | SSD1          | YJR135C                 | MCM22         |
| YHR013C                                          | ARD1          | YLR315W                 | NKP2          |
| YMR125W                                          | STO1          | YPL256C                 | CLN2          |
| YGR275W                                          | RTT102        | YOR156C                 | NFI1          |
| YOR080W                                          | DIA2          | YGL200C                 | EMP24         |
| YJL172W                                          | CPS1          | YOL081W                 | IRA2          |
| YOR270C                                          | VPH1          | YDR310C                 | SUM1          |
| YDR440W                                          | DOT1          | YBR010W                 | HHT1          |
| YDR293C                                          | SSD1          | YBL051C                 | PIN4          |
| YNL054W                                          | VAC7          | YKL110C                 | KTI12         |
| YHR156C                                          | LIN1          | YGL115W                 | SNF4          |
| YPL115C                                          | BEM3          | YMR127C                 | SAS2          |
| YNL069C                                          | RPL16B        | YDL006W                 | PTC1          |
| YLR119W                                          | SRN2          | YGL124C                 | MON1          |
| YLR398C                                          | SKI2          | YOL081W                 | IRA2          |
| YLR381W                                          | CTF3          | YGL250W                 | RMR1          |
| YER044C                                          | ERG28         | YLR371W                 | ROM2          |
| YPR018W                                          | RLF2          | YLR234W                 | TOP3          |
| YBR258C                                          | SHG1          | YOL145C                 | CTR9          |
| YHR039C-A                                        | VMA10         | YBR280C                 | SAF1          |
| YAL024C                                          | LTE1          | YPR046W                 | MCM16         |
| YMR199W                                          | CLN1          | YML095C                 | RAD10         |

| Predictions at threshold level 0.80 continued... |               |                         |               |
|--------------------------------------------------|---------------|-------------------------|---------------|
| Gene1 of predicted pair                          |               | Gene2 of predicted pair |               |
| Systematic Name                                  | Standard Name | Systematic Name         | Standard Name |
| YHR119W                                          | SET1          | YBR258C                 | SHG1          |
| YML016C                                          | PPZ1          | YLR350W                 | ORM2          |
| YGL115W                                          | SNF4          | YGL054C                 | ERV14         |
| YHR200W                                          | RPN10         | YJR135C                 | MCM22         |
| YGL200C                                          | EMP24         | YAL055W                 | PEX22         |
| YKR072C                                          | SIS2          | YGL175C                 | SAE2          |
| YLR093C                                          | NYV1          | YER139C                 | YER139C       |
| YHR156C                                          | LIN1          | YGL212W                 | VAM7          |
| YGL246C                                          | RAI1          | YDR025W                 | RPS11A        |
| YER116C                                          | SLX8          | YDR310C                 | SUM1          |
| YDR260C                                          | SWM1          | YOL054W                 | PSH1          |
| YOR195W                                          | SLK19         | YLR315W                 | NKP2          |
| YNL199C                                          | GCR2          | YIR005W                 | IST3          |
| YPL161C                                          | BEM4          | YBR082C                 | UBC4          |
| YLL007C                                          | YLL007C       | YJR090C                 | GRR1          |
| YIL053W                                          | RHR2          | YBR036C                 | CSG2          |
| YNL054W                                          | VAC7          | YML016C                 | PPZ1          |
| YHR098C                                          | SFB3          | YBR231C                 | SWC5          |
| YBL046W                                          | PSY4          | YPR040W                 | TIP41         |
| YDR174W                                          | HMO1          | YLR182W                 | SWI6          |
| YDL116W                                          | NUP84         | YJR059W                 | PTK2          |
| YGL003C                                          | CDH1          | YLR398C                 | SKI2          |
| YER162C                                          | RAD4          | YPL120W                 | VPS30         |
| YJL053W                                          | PEP8          | YML001W                 | YPT7          |
| YBR030W                                          | YBR030W       | YPL137C                 | GIP3          |
| YDR309C                                          | GIC2          | YKR048C                 | NAP1          |
| YBR019C                                          | GAL10         | YNL076W                 | MKS1          |
| YHR134W                                          | WSS1          | YOR132W                 | VPS17         |
| YHR205W                                          | SCH9          | YGR063C                 | SPT4          |

| Predictions at threshold level 0.80 continued... |               |                         |               |
|--------------------------------------------------|---------------|-------------------------|---------------|
| Gene1 of predicted pair                          |               | Gene2 of predicted pair |               |
| Systematic Name                                  | Standard Name | Systematic Name         | Standard Name |
| YLR313C                                          | SPH1          | YGL175C                 | SAE2          |
| YBR200W                                          | BEM1          | YBR019C                 | GAL10         |
| YDL013W                                          | SLX5          | YGR188C                 | BUB1          |
| YDR439W                                          | LRS4          | YPL253C                 | VIK1          |
| YOR106W                                          | VAM3          | YGL237C                 | HAP2          |
| YDR507C                                          | GIN4          | YDL047W                 | SIT4          |
| YOR033C                                          | EXO1          | YJR090C                 | GRR1          |
| YCR020C-A                                        | MAK31         | YIL076W                 | SEC28         |
| YML115C                                          | VAN1          | YER001W                 | MNN1          |
| YDR477W                                          | SNF1          | YPL057C                 | SUR1          |
| YDR202C                                          | RAV2          | YDL077C                 | VAM6          |
| YGL078C                                          | DBP3          | YGR249W                 | MGA1          |
| YLR150W                                          | STM1          | YMR038C                 | CCS1          |
| YML013W                                          | UBX2          | YNL297C                 | MON2          |
| YJL176C                                          | SWI3          | YLR425W                 | TUS1          |
| YDR156W                                          | RPA14         | YDR183W                 | PLP1          |
| YPR131C                                          | NAT3          | YGR081C                 | SLX9          |
| YOR127W                                          | RGA1          | YKL032C                 | IXR1          |
| YLR234W                                          | TOP3          | YFL023W                 | BUD27         |
| YBR173C                                          | UMP1          | YLR192C                 | HCR1          |
| YBR108W                                          | YBR108W       | YDR183W                 | PLP1          |
| YIL159W                                          | BNR1          | YPL024W                 | RMI1          |
| YIL076W                                          | SEC28         | YJR060W                 | CBF1          |
| YGR020C                                          | VMA7          | YDL077C                 | VAM6          |
| YLR360W                                          | VPS38         | YDR183W                 | PLP1          |
| YIL159W                                          | BNR1          | YML071C                 | COG8          |
| YNL288W                                          | CAF40         | YML016C                 | PPZ1          |
| YGL180W                                          | ATG1          | YPR185W                 | ATG13         |
| YML016C                                          | PPZ1          | YGR188C                 | BUB1          |

| Predictions at threshold level 0.80 continued... |               |                         |               |
|--------------------------------------------------|---------------|-------------------------|---------------|
| Gene1 of predicted pair                          |               | Gene2 of predicted pair |               |
| Systematic Name                                  | Standard Name | Systematic Name         | Standard Name |
| YIL076W                                          | SEC28         | YDR137W                 | RGP1          |
| YML038C                                          | YMD8          | YNL127W                 | FAR11         |
| YJL154C                                          | VPS35         | YDR456W                 | NHX1          |
| YHR013C                                          | ARD1          | YPR120C                 | CLB5          |
| YER120W                                          | SCS2          | YNR032W                 | PPG1          |
| YGL147C                                          | RPL9A         | YDR310C                 | SUM1          |
| YBR173C                                          | UMP1          | YLR234W                 | TOP3          |
| YOR132W                                          | VPS17         | YKR001C                 | VPS1          |
| YHR060W                                          | VMA22         | YPL161C                 | BEM4          |
| YOR001W                                          | RRP6          | YGL115W                 | SNF4          |
| YMR054W                                          | STV1          | YER162C                 | RAD4          |
| YBR258C                                          | SHG1          | YOR156C                 | NFI1          |
| YEL043W                                          | YEL043W       | YNR032W                 | PPG1          |
| YDR202C                                          | RAV2          | YDR080W                 | VPS41         |
| YJR040W                                          | GEF1          | YHR012W                 | VPS29         |
| YMR133W                                          | REC114        | YJR032W                 | CPR7          |
| YBR290W                                          | BSD2          | YDL155W                 | CLB3          |
| YHR200W                                          | RPN10         | YNL229C                 | URE2          |
| YLR441C                                          | RPS1A         | YMR133W                 | REC114        |
| YKL048C                                          | ELM1          | YDL006W                 | PTC1          |
| YBR138C                                          | YBR138C       | YMR022W                 | UBC7          |
| YOR109W                                          | INP53         | YPL037C                 | EGD1          |
| YML001W                                          | YPT7          | YPR030W                 | CSR2          |
| YKL135C                                          | APL2          | YOR069W                 | VPS5          |
| YER115C                                          | SPR6          | YML109W                 | ZDS2          |
| YMR133W                                          | REC114        | YMR214W                 | SCJ1          |
| YMR055C                                          | BUB2          | YHR114W                 | BZZ1          |
| YBR036C                                          | CSG2          | YDR310C                 | SUM1          |
| YML103C                                          | NUP188        | YMR199W                 | CLN1          |

| Predictions at threshold level 0.80 continued... |               |                         |               |
|--------------------------------------------------|---------------|-------------------------|---------------|
| Gene1 of predicted pair                          |               | Gene2 of predicted pair |               |
| Systematic Name                                  | Standard Name | Systematic Name         | Standard Name |
| YML103C                                          | NUP188        | YJR090C                 | GRR1          |
| YDL184C                                          | RPL41A        | YFL023W                 | BUD27         |
| YLR320W                                          | MMS22         | YOR035C                 | SHE4          |
| YML058W                                          | SML1          | YBL088C                 | TEL1          |
| YBL103C                                          | RTG3          | YHR039C-A               | VMA10         |
| YPR049C                                          | ATG11         | YGL180W                 | ATG1          |
| YOR290C                                          | SNF2          | YPL057C                 | SUR1          |
| YJR135C                                          | MCM22         | YBR036C                 | CSG2          |
| YOR069W                                          | VPS5          | YJR060W                 | CBF1          |
| YGL223C                                          | COG1          | YOR327C                 | SNC2          |
| YDL184C                                          | RPL41A        | YHR060W                 | VMA22         |
| YER114C                                          | BOI2          | YGL124C                 | MON1          |
| YDL116W                                          | NUP84         | YLR386W                 | VAC14         |
| YLR315W                                          | NKP2          | YAL002W                 | VPS8          |
| YHR200W                                          | RPN10         | YHR081W                 | LRP1          |
| YNL307C                                          | MCK1          | YMR055C                 | BUB2          |
| YJL060W                                          | BNA3          | YJL058C                 | BIT61         |
| YGL115W                                          | SNF4          | YDL226C                 | GCS1          |
| YPR046W                                          | MCM16         | YDL047W                 | SIT4          |
| YER116C                                          | SLX8          | YNL297C                 | MON2          |
| YFL013C                                          | IES1          | YPL129W                 | TAF14         |
| YDL227C                                          | HO            | YLL013C                 | PUF3          |
| YNL297C                                          | MON2          | YER120W                 | SCS2          |
| YGR135W                                          | PRE9          | YJL183W                 | MNN11         |
| YML058W                                          | SML1          | YKL114C                 | APN1          |
| YNL325C                                          | FIG4          | YOR043W                 | WHI2          |
| YLR386W                                          | VAC14         | YDR378C                 | LSM6          |
| YEL051W                                          | VMA8          | YER122C                 | GLO3          |
| YPL161C                                          | BEM4          | YER120W                 | SCS2          |

| Predictions at threshold level 0.80 continued... |               |                         |               |
|--------------------------------------------------|---------------|-------------------------|---------------|
| Gene1 of predicted pair                          |               | Gene2 of predicted pair |               |
| Systematic Name                                  | Standard Name | Systematic Name         | Standard Name |
| YFR010W                                          | UBP6          | YDR378C                 | LSM6          |
| YEL065W                                          | SIT1          | YMR214W                 | SCJ1          |
| YLR315W                                          | NKP2          | YMR038C                 | CCS1          |
| YJR010C-A                                        | SPC1          | YML019W                 | OST6          |
| YDR004W                                          | RAD57         | YCR086W                 | CSM1          |
| YBR030W                                          | YBR030W       | YNL058C                 | YNL058C       |
| YFL031W                                          | HAC1          | YOR036W                 | PEP12         |
| YGR019W                                          | UGA1          | YPR051W                 | MAK3          |
| YGR072W                                          | UPF3          | YAR014C                 | BUD14         |
| YPL105C                                          | YPL105C       | YGL054C                 | ERV14         |
| YMR198W                                          | CIK1          | YGR188C                 | BUB1          |
| YOR112W                                          | CEX1          | YOR106W                 | VAM3          |
| YBL102W                                          | SFT2          | YER122C                 | GLO3          |
| YBR171W                                          | SEC66         | YNR072W                 | HXT17         |
| YJR032W                                          | CPR7          | YEL060C                 | PRB1          |
| YBR215W                                          | HPC2          | YER122C                 | GLO3          |
| YEL065W                                          | SIT1          | YNL307C                 | MCK1          |
| YBR215W                                          | HPC2          | YGL148W                 | ARO2          |
| YNL215W                                          | IES2          | YHR167W                 | THP2          |
| YGL031C                                          | RPL24A        | YDR207C                 | UME6          |
| YPR101W                                          | SNT309        | YPL213W                 | LEA1          |
| YOR195W                                          | SLK19         | YBR200W                 | BEM1          |
| YDR004W                                          | RAD57         | YML102W                 | CAC2          |
| YJR140C                                          | HIR3          | YER122C                 | GLO3          |
| YOR270C                                          | VPH1          | YCR053W                 | THR4          |
| YML103C                                          | NUP188        | YDR439W                 | LRS4          |
| YJL127C                                          | SPT10         | YPL161C                 | BEM4          |
| YHR134W                                          | WSS1          | YPL057C                 | SUR1          |
| YNL166C                                          | BNI5          | YMR055C                 | BUB2          |

| Predictions at threshold level 0.80 continued... |               |                         |               |
|--------------------------------------------------|---------------|-------------------------|---------------|
| Gene1 of predicted pair                          |               | Gene2 of predicted pair |               |
| Systematic Name                                  | Standard Name | Systematic Name         | Standard Name |
| YJR140C                                          | HIR3          | YLR350W                 | ORM2          |
| YMR198W                                          | CIK1          | YMR202W                 | ERG2          |
| YFR010W                                          | UBP6          | YPR120C                 | CLB5          |
| YDL020C                                          | RPN4          | YPL161C                 | BEM4          |
| YMR026C                                          | PEX12         | YNL238W                 | KEX2          |
| YDR137W                                          | RGP1          | YMR311C                 | GLC8          |
| YGL161C                                          | YIP5          | YJL124C                 | LSM1          |
| YDR363W-A                                        | SEM1          | YOR308C                 | SNU66         |
| YDR293C                                          | SSD1          | YGR152C                 | RSR1          |
| YBR158W                                          | AMN1          | YLR309C                 | IMH1          |
| YDR144C                                          | MKC7          | YOL067C                 | RTG1          |
| YGL212W                                          | VAM7          | YMR311C                 | GLC8          |
| YKL110C                                          | KTI12         | YGL252C                 | RTG2          |
| YHR119W                                          | SET1          | YGR166W                 | KRE11         |
| YPR120C                                          | CLB5          | YOL081W                 | IRA2          |
| YPL115C                                          | BEM3          | YDR379W                 | RGA2          |
| YGR135W                                          | PRE9          | YLR425W                 | TUS1          |
| YLR386W                                          | VAC14         | YLR233C                 | EST1          |
| YBL102W                                          | SFT2          | YER120W                 | SCS2          |
| YMR224C                                          | MRE11         | YOR066W                 | MSA1          |
| YLR018C                                          | POM34         | YKR095W                 | MLP1          |
| YJR084W                                          | CSN12         | YDR207C                 | UME6          |
| YDR004W                                          | RAD57         | YJR084W                 | CSN12         |
| YNL069C                                          | RPL16B        | YNL107W                 | YAF9          |
| YNL199C                                          | GCR2          | YNL079C                 | TPM1          |
| YDR071C                                          | PAA1          | YBR010W                 | HHT1          |
| YGR108W                                          | CLB1          | YMR055C                 | BUB2          |
| YML103C                                          | NUP188        | YKL139W                 | CTK1          |
| YOR033C                                          | EXO1          | YMR224C                 | MRE11         |

| Predictions at threshold level 0.80 continued... |               |                         |               |
|--------------------------------------------------|---------------|-------------------------|---------------|
| Gene1 of predicted pair                          |               | Gene2 of predicted pair |               |
| Systematic Name                                  | Standard Name | Systematic Name         | Standard Name |
| YOR127W                                          | RGA1          | YLR233C                 | EST1          |
| YHR111W                                          | UBA4          | YEL056W                 | HAT2          |
| YBR107C                                          | IML3          | YGR054W                 | YGR054W       |
| YKR035W-A                                        | DID2          | YDR261C                 | EXG2          |
| YIL005W                                          | EPS1          | YHR200W                 | RPN10         |
| YJL004C                                          | SYS1          | YOR327C                 | SNC2          |
| YLR447C                                          | VMA6          | YPR046W                 | MCM16         |
| YNL325C                                          | FIG4          | YML001W                 | YPT7          |
| YMR224C                                          | MRE11         | YOL054W                 | PSH1          |
| YPL024W                                          | RMI1          | YBR107C                 | IML3          |
| YGL253W                                          | HXK2          | YLR233C                 | EST1          |
| YER139C                                          | YER139C       | YLR398C                 | SKI2          |
| YER059W                                          | PCL6          | YPL219W                 | PCL8          |
| YJL176C                                          | SWI3          | YAL002W                 | VPS8          |
| YGR184C                                          | UBR1          | YDR335W                 | MSN5          |
| YLR148W                                          | PEP3          | YLR360W                 | VPS38         |
| YML095C                                          | RAD10         | YIL008W                 | URM1          |
| YHR205W                                          | SCH9          | YGR078C                 | PAC10         |
| YPR131C                                          | NAT3          | YLR079W                 | SIC1          |
| YFR010W                                          | UBP6          | YHR156C                 | LIN1          |
| YNL031C                                          | HHT2          | YBR009C                 | HHF1          |
| YOR109W                                          | INP53         | YDL077C                 | VAM6          |
| YNL291C                                          | MID1          | YDR320C                 | SWA2          |
| YML016C                                          | PPZ1          | YGR270W                 | YTA7          |
| YJR031C                                          | GEA1          | YDL226C                 | GCS1          |
| YGL174W                                          | BUD13         | YDR440W                 | DOT1          |
| YLR234W                                          | TOP3          | YLR381W                 | CTF3          |
| YGR108W                                          | CLB1          | YPL253C                 | VIK1          |
| YBR200W                                          | BEM1          | YDR137W                 | RGP1          |



| Predictions at threshold level 0.80 continued... |               |                         |               |
|--------------------------------------------------|---------------|-------------------------|---------------|
| Gene1 of predicted pair                          |               | Gene2 of predicted pair |               |
| Systematic Name                                  | Standard Name | Systematic Name         | Standard Name |
| YGL147C                                          | RPL9A         | YFR010W                 | UBP6          |
| YAL024C                                          | LTE1          | YML001W                 | YPT7          |
| YDR176W                                          | NGG1          | YBL003C                 | HTA2          |
| YBR041W                                          | FAT1          | YBR082C                 | UBC4          |
| YGR072W                                          | UPF3          | YDR108W                 | GSG1          |
| YER162C                                          | RAD4          | YNL051W                 | COG5          |
| YOR337W                                          | TEA1          | YFR036W                 | CDC26         |
| YFL023W                                          | BUD27         | YMR230W                 | RPS10B        |
| YKL048C                                          | ELM1          | YPL152W                 | RRD2          |
| YGR184C                                          | UBR1          | YHR013C                 | ARD1          |
| YOL062C                                          | APM4          | YJR058C                 | APS2          |
| YDR254W                                          | CHL4          | YIR005W                 | IST3          |
| YGL115W                                          | SNF4          | YDR153C                 | ENT5          |
| YJL117W                                          | PHO86         | YGR135W                 | PRE9          |
| YBR057C                                          | MUM2          | YML115C                 | VAN1          |
| YOR132W                                          | VPS17         | YBR114W                 | RAD16         |
| YBR057C                                          | MUM2          | YDR260C                 | SWM1          |
| YBR108W                                          | YBR108W       | YMR127C                 | SAS2          |
| YLR043C                                          | TRX1          | YLR396C                 | VPS33         |
| YDR443C                                          | SSN2          | YCR084C                 | TUP1          |
| YDL184C                                          | RPL41A        | YKR026C                 | GCN3          |
| YLR058C                                          | SHM2          | YDR171W                 | HSP42         |
| YPL256C                                          | CLN2          | YKL161C                 | YKL161C       |
| YGR072W                                          | UPF3          | YJL036W                 | SNX4          |
| YDL116W                                          | NUP84         | YHR010W                 | RPL27A        |
| YNL106C                                          | INP52         | YGR270W                 | YTA7          |
| YNL106C                                          | INP52         | YOR141C                 | ARP8          |
| YDR477W                                          | SNF1          | YKR035W-A               | DID2          |
| YGL212W                                          | VAM7          | YOR208W                 | PTP2          |

| Predictions at threshold level 0.80 continued... |               |                         |               |
|--------------------------------------------------|---------------|-------------------------|---------------|
| Gene1 of predicted pair                          |               | Gene2 of predicted pair |               |
| Systematic Name                                  | Standard Name | Systematic Name         | Standard Name |
| YBR019C                                          | GAL10         | YEL060C                 | PRB1          |
| YOR197W                                          | MCA1          | YLR206W                 | ENT2          |
| YDR320C                                          | SWA2          | YJR125C                 | ENT3          |
| YKR020W                                          | VPS51         | YDR310C                 | SUM1          |
| YML115C                                          | VAN1          | YHR200W                 | RPN10         |
| YOR290C                                          | SNF2          | YHR081W                 | LRP1          |
| YMR055C                                          | BUB2          | YDR155C                 | CPR1          |
| YBR108W                                          | YBR108W       | YNL238W                 | KEX2          |
| YKL139W                                          | CTK1          | YBR019C                 | GAL10         |
| YBR114W                                          | RAD16         | YDR310C                 | SUM1          |
| YOR270C                                          | VPH1          | YNL238W                 | KEX2          |
| YEL056W                                          | HAT2          | YNL107W                 | YAF9          |
| YMR224C                                          | MRE11         | YML097C                 | VPS9          |
| YHR052W                                          | CIC1          | YIL133C                 | RPL16A        |
| YEL009C                                          | GCN4          | YHR079C                 | IRE1          |
| YHL020C                                          | OPI1          | YGL115W                 | SNF4          |
| YNL032W                                          | SIW14         | YDL184C                 | RPL41A        |
| YMR142C                                          | RPL13B        | YOL111C                 | MDY2          |
| YDR469W                                          | SDC1          | YER122C                 | GLO3          |
| YKR059W                                          | TIF1          | YLR234W                 | TOP3          |
| YNL215W                                          | IES2          | YHR111W                 | UBA4          |
| YBR217W                                          | ATG12         | YPL149W                 | ATG5          |
| YPR167C                                          | MET16         | YGR209C                 | TRX2          |
| YLR079W                                          | SIC1          | YJR005W                 | APL1          |
| YBR057C                                          | MUM2          | YJL095W                 | BCK1          |
| YOR033C                                          | EXO1          | YBR082C                 | UBC4          |
| YDR320C                                          | SWA2          | YNL127W                 | FAR11         |
| YKR001C                                          | VPS1          | YNL127W                 | FAR11         |
| YIL076W                                          | SEC28         | YEL060C                 | PRB1          |

| Predictions at threshold level 0.80 continued... |               |                         |               |
|--------------------------------------------------|---------------|-------------------------|---------------|
| Gene1 of predicted pair                          |               | Gene2 of predicted pair |               |
| Systematic Name                                  | Standard Name | Systematic Name         | Standard Name |
| YNL139C                                          | RLR1          | YNL004W                 | HRB1          |
| YNL025C                                          | SSN8          | YLR182W                 | SWI6          |
| YGL033W                                          | HOP2          | YGR249W                 | MGA1          |
| YFL023W                                          | BUD27         | YHR039C-A               | VMA10         |
| YBL058W                                          | SHP1          | YNL032W                 | SIW14         |
| YNL032W                                          | SIW14         | YBR108W                 | YBR108W       |
| YBR200W                                          | BEM1          | YEL043W                 | YEL043W       |
| YIL159W                                          | BNR1          | YLR192C                 | HCR1          |
| YMR224C                                          | MRE11         | YLR352W                 | YLR352W       |
| YPL152W                                          | RRD2          | YOR141C                 | ARP8          |
| YBR217W                                          | ATG12         | YNR072W                 | HXT17         |
| YGL153W                                          | PEX14         | YNL079C                 | TPM1          |
| YML038C                                          | YMD8          | YDR207C                 | UME6          |
| YJR140C                                          | HIR3          | YDR378C                 | LSM6          |
| YFR010W                                          | UBP6          | YDR254W                 | CHL4          |
| YMR224C                                          | MRE11         | YDR254W                 | CHL4          |
| YOR337W                                          | TEA1          | YNR072W                 | HXT17         |
| YDR080W                                          | VPS41         | YML038C                 | YMD8          |
| YLR119W                                          | SRN2          | YJL095W                 | BCK1          |
| YAL024C                                          | LTE1          | YEL053C                 | MAK10         |
| YBR200W                                          | BEM1          | YDR363W-A               | SEM1          |
| YLR093C                                          | NYV1          | YEL036C                 | ANP1          |
| YLR079W                                          | SIC1          | YFL047W                 | RGD2          |
| YPL240C                                          | HSP82         | YHR071W                 | PCL5          |
| YPL140C                                          | MKK2          | YLR313C                 | SPH1          |
| YIL076W                                          | SEC28         | YBL103C                 | RTG3          |
| YGL147C                                          | RPL9A         | YML115C                 | VAN1          |
| YNL044W                                          | YIP3          | YDL192W                 | ARF1          |
| YJR056C                                          | YJR056C       | YGL212W                 | VAM7          |

| Predictions at threshold level 0.80 continued... |               |                         |               |
|--------------------------------------------------|---------------|-------------------------|---------------|
| Gene1 of predicted pair                          |               | Gene2 of predicted pair |               |
| Systematic Name                                  | Standard Name | Systematic Name         | Standard Name |
| YEL050C                                          | RML2          | YLR429W                 | CRN1          |
| YNL206C                                          | RTT106        | YNL107W                 | YAF9          |
| YGR072W                                          | UPF3          | YIL076W                 | SEC28         |
| YLR083C                                          | EMP70         | YPR084W                 | YPR084W       |
| YDR245W                                          | MNN10         | YPL057C                 | SUR1          |
| YJR140C                                          | HIR3          | YFR021W                 | ATG18         |
| YDR156W                                          | RPA14         | YAR014C                 | BUD14         |
| YNL218W                                          | MGS1          | YOR033C                 | EXO1          |
| YDL223C                                          | HBT1          | YEL036C                 | ANP1          |
| YDL223C                                          | HBT1          | YER139C                 | YER139C       |
| YLR095C                                          | IOC2          | YPR036W                 | VMA13         |
| YDR320C                                          | SWA2          | YKR030W                 | GMH1          |
| YPR051W                                          | MAK3          | YPL105C                 | YPL105C       |
| YMR224C                                          | MRE11         | YJL176C                 | SWI3          |
| YNL291C                                          | MID1          | YJL004C                 | SYS1          |
| YOR043W                                          | WHI2          | YLR320W                 | MMS22         |
| YDL020C                                          | RPN4          | YGL087C                 | MMS2          |
| YPL096C-A                                        | ERI1          | YGR229C                 | SMI1          |
| YFR031C-A                                        | RPL2A         | YPR030W                 | CSR2          |
| YCR020C-A                                        | MAK31         | YPL105C                 | YPL105C       |
| YGL212W                                          | VAM7          | YNL058C                 | YNL058C       |
| YDR004W                                          | RAD57         | YLR352W                 | YLR352W       |
| YLR095C                                          | IOC2          | YML071C                 | COG8          |
| YHR216W                                          | IMD2          | YGR262C                 | BUD32         |
| YLR315W                                          | NKP2          | YPL018W                 | CTF19         |
| YLR360W                                          | VPS38         | YKR014C                 | YPT52         |
| YDR181C                                          | SAS4          | YOR213C                 | SAS5          |
| YDR484W                                          | VPS52         | YDL083C                 | RPS16B        |
| YDR289C                                          | RTT103        | YDR183W                 | PLP1          |

| Predictions at threshold level 0.80 continued... |               |                         |               |
|--------------------------------------------------|---------------|-------------------------|---------------|
| Gene1 of predicted pair                          |               | Gene2 of predicted pair |               |
| Systematic Name                                  | Standard Name | Systematic Name         | Standard Name |
| YGR020C                                          | VMA7          | YMR054W                 | STV1          |
| YKL139W                                          | CTK1          | YDR358W                 | GGA1          |
| YEL009C                                          | GCN4          | YDL005C                 | MED2          |
| YML016C                                          | PPZ1          | YIR005W                 | IST3          |
| YDR254W                                          | CHL4          | YLR410W                 | VIP1          |
| YDR440W                                          | DOT1          | YLR425W                 | TUS1          |
| YBR200W                                          | BEM1          | YLR120C                 | YPS1          |
| YBR107C                                          | IML3          | YPR119W                 | CLB2          |
| YGL190C                                          | CDC55         | YPL256C                 | CLN2          |
| YBR215W                                          | HPC2          | YDR137W                 | RGP1          |
| YDR004W                                          | RAD57         | YHR178W                 | STB5          |
| YBR200W                                          | BEM1          | YJL172W                 | CPS1          |
| YPL253C                                          | VIK1          | YER096W                 | SHC1          |
| YMR142C                                          | RPL13B        | YEL060C                 | PRB1          |
| YBR200W                                          | BEM1          | YHL031C                 | GOS1          |
| YGL147C                                          | RPL9A         | YBR036C                 | CSG2          |
| YLR234W                                          | TOP3          | YML095C                 | RAD10         |
| YHR205W                                          | SCH9          | YGL086W                 | MAD1          |
| YBR173C                                          | UMP1          | YJR032W                 | CPR7          |
| YNL041C                                          | COG6          | YMR054W                 | STV1          |
| YLR292C                                          | SEC72         | YAR014C                 | BUD14         |
| YKL139W                                          | CTK1          | YHL031C                 | GOS1          |
| YLR337C                                          | VRP1          | YBL021C                 | HAP3          |
| YGL178W                                          | MPT5          | YPR120C                 | CLB5          |
| YKL116C                                          | PRR1          | YDL077C                 | VAM6          |
| YDL020C                                          | RPN4          | YOR132W                 | VPS17         |
| YGL174W                                          | BUD13         | YOR124C                 | UBP2          |
| YBL051C                                          | PIN4          | YGL124C                 | MON1          |
| YBR019C                                          | GAL10         | YLR398C                 | SKI2          |

| Predictions at threshold level 0.80 continued... |               |                         |               |
|--------------------------------------------------|---------------|-------------------------|---------------|
| Gene1 of predicted pair                          |               | Gene2 of predicted pair |               |
| Systematic Name                                  | Standard Name | Systematic Name         | Standard Name |
| YNL291C                                          | MID1          | YML038C                 | YMD8          |
| YNL215W                                          | IES2          | YOR124C                 | UBP2          |
| YLR360W                                          | VPS38         | YGR054W                 | YGR054W       |
| YGR104C                                          | SRB5          | YNL107W                 | YAF9          |
| YDL216C                                          | RRI1          | YMR025W                 | CSI1          |
| YOR106W                                          | VAM3          | YDR153C                 | ENT5          |
| YDR254W                                          | CHL4          | YLR452C                 | SST2          |
| YDR335W                                          | MSN5          | YBR107C                 | IML3          |
| YPL024W                                          | RMI1          | YJR056C                 | YJR056C       |
| YDR383C                                          | NKP1          | YIL036W                 | CST6          |
| YDR174W                                          | HMO1          | YAR014C                 | BUD14         |
| YJL053W                                          | PEP8          | YER120W                 | SCS2          |
| YMR153W                                          | NUP53         | YLR398C                 | SKI2          |
| YJR040W                                          | GEF1          | YPL195W                 | APL5          |
| YNL288W                                          | CAF40         | YNL166C                 | BNI5          |
| YPR084W                                          | YPR084W       | YNL069C                 | RPL16B        |
| YDL002C                                          | NHP10         | YLR315W                 | NKP2          |
| YEL053C                                          | MAK10         | YOR066W                 | MSA1          |
| YPR046W                                          | MCM16         | YOR014W                 | RTS1          |
| YGL115W                                          | SNF4          | YAR014C                 | BUD14         |
| YDR245W                                          | MNN10         | YIR005W                 | IST3          |
| YDL042C                                          | SIR2          | YHR061C                 | GIC1          |
| YPL253C                                          | VIK1          | YNL166C                 | BNI5          |
| YOR032C                                          | HMS1          | YLR234W                 | TOP3          |
| YPL195W                                          | APL5          | YAR014C                 | BUD14         |
| YAL024C                                          | LTE1          | YLR254C                 | NDL1          |
| YKL116C                                          | PRR1          | YMR016C                 | SOK2          |
| YNL068C                                          | FKH2          | YBL087C                 | RPL23A        |
| YOR112W                                          | CEX1          | YPR051W                 | MAK3          |

| Predictions at threshold level 0.80 continued... |               |                         |               |
|--------------------------------------------------|---------------|-------------------------|---------------|
| Gene1 of predicted pair                          |               | Gene2 of predicted pair |               |
| Systematic Name                                  | Standard Name | Systematic Name         | Standard Name |
| YDR183W                                          | PLP1          | YHR114W                 | BZZ1          |
| YOR290C                                          | SNF2          | YOL111C                 | MDY2          |
| YCL037C                                          | SRO9          | YHR060W                 | VMA22         |
| YNL215W                                          | IES2          | YHR200W                 | RPN10         |
| YDL116W                                          | NUP84         | YMR153W                 | NUP53         |
| YIL036W                                          | CST6          | YNL225C                 | CNM67         |
| YMR202W                                          | ERG2          | YNL107W                 | YAF9          |
| YML013W                                          | UBX2          | YOR368W                 | RAD17         |
| YPL115C                                          | BEM3          | YDR309C                 | GIC2          |
| YNL297C                                          | MON2          | YGR188C                 | BUB1          |
| YPR120C                                          | CLB5          | YNL236W                 | SIN4          |
| YBR217W                                          | ATG12         | YOL121C                 | RPS19A        |
| YEL050C                                          | RML2          | YMR198W                 | CIK1          |
| YDL223C                                          | HBT1          | YDR207C                 | UME6          |
| YDR318W                                          | MCM21         | YDL226C                 | GCS1          |
| YNL032W                                          | SIW14         | YPL137C                 | GIP3          |
| YBL008W                                          | HIR1          | YOR043W                 | WHI2          |
| YDR108W                                          | GSG1          | YDR080W                 | VPS41         |
| YGL066W                                          | SGF73         | YMR198W                 | CIK1          |
| YJR059W                                          | PTK2          | YGL016W                 | KAP122        |
| YER001W                                          | MNN1          | YPL050C                 | MNN9          |
| YMR153W                                          | NUP53         | YGL115W                 | SNF4          |
| YOR043W                                          | WHI2          | YOR308C                 | SNU66         |
| YLR234W                                          | TOP3          | YBR278W                 | DPB3          |
| YMR172W                                          | HOT1          | YOR127W                 | RGA1          |
| YMR054W                                          | STV1          | YPL195W                 | APL5          |
| YOL126C                                          | MDH2          | YGR059W                 | SPR3          |
| YMR216C                                          | SKY1          | YPL234C                 | TFP3          |
| YLL007C                                          | YLL007C       | YGR054W                 | YGR054W       |

| Predictions at threshold level 0.80 continued... |               |                         |               |
|--------------------------------------------------|---------------|-------------------------|---------------|
| Gene1 of predicted pair                          |               | Gene2 of predicted pair |               |
| Systematic Name                                  | Standard Name | Systematic Name         | Standard Name |
| YHR039C-A                                        | VMA10         | YMR152W                 | YIM1          |
| YDR318W                                          | MCM21         | YJL095W                 | BCK1          |
| YFR010W                                          | UBP6          | YOL121C                 | RPS19A        |
| YPR046W                                          | MCM16         | YMR038C                 | CCS1          |
| YOR069W                                          | VPS5          | YGL054C                 | ERV14         |
| YOR127W                                          | RGA1          | YHR114W                 | BZZ1          |
| YGL115W                                          | SNF4          | YJR033C                 | RAV1          |
| YDR477W                                          | SNF1          | YER139C                 | YER139C       |
| YML115C                                          | VAN1          | YDL155W                 | CLB3          |
| YBR127C                                          | VMA2          | YMR231W                 | PEP5          |
| YNL054W                                          | VAC7          | YHR111W                 | UBA4          |
| YGL223C                                          | COG1          | YFL031W                 | HAC1          |
| YDR108W                                          | GSG1          | YOR043W                 | WHI2          |
| YPL105C                                          | YPL105C       | YGL115W                 | SNF4          |
| YMR179W                                          | SPT21         | YDL226C                 | GCS1          |
| YDR289C                                          | RTT103        | YDR310C                 | SUM1          |
| YLR292C                                          | SEC72         | YGL124C                 | MON1          |
| YNL325C                                          | FIG4          | YPL195W                 | APL5          |
| YGR249W                                          | MGA1          | YKL126W                 | YPK1          |
| YPL120W                                          | VPS30         | YDL077C                 | VAM6          |
| YAL056W                                          | GPB2          | YOR371C                 | GPB1          |
| YFR031C-A                                        | RPL2A         | YBR108W                 | YBR108W       |
| YBR108W                                          | YBR108W       | YBR107C                 | IML3          |
| YGL115W                                          | SNF4          | YLR093C                 | NYV1          |
| YPR036W                                          | VMA13         | YPR120C                 | CLB5          |
| YNL215W                                          | IES2          | YFR010W                 | UBP6          |
| YKL126W                                          | YPK1          | YLR452C                 | SST2          |
| YKL007W                                          | CAP1          | YBL103C                 | RTG3          |
| YLR061W                                          | RPL22A        | YLR192C                 | HCR1          |



| Predictions at threshold level 0.80 continued... |               |                         |               |
|--------------------------------------------------|---------------|-------------------------|---------------|
| Gene1 of predicted pair                          |               | Gene2 of predicted pair |               |
| Systematic Name                                  | Standard Name | Systematic Name         | Standard Name |
| YBR274W                                          | CHK1          | YGL094C                 | PAN2          |
| YBL058W                                          | SHP1          | YMR016C                 | SOK2          |
| YGL060W                                          | YBP2          | YML007W                 | YAP1          |
| YLR337C                                          | VRP1          | YEL044W                 | IES6          |
| YNL058C                                          | YNL058C       | YDR358W                 | GGA1          |
| YNL307C                                          | MCK1          | YIL103W                 | DPH1          |
| YDL083C                                          | RPS16B        | YJR032W                 | CPR7          |
| YBR200W                                          | BEM1          | YJR063W                 | RPA12         |
| YHR134W                                          | WSS1          | YHL002W                 | HSE1          |
| YLR150W                                          | STM1          | YDL013W                 | SLX5          |
| YKR020W                                          | VPS51         | YML097C                 | VPS9          |
| YBL047C                                          | EDE1          | YOR275C                 | RIM20         |
| YBR194W                                          | SOY1          | YMR055C                 | BUB2          |
| YNL329C                                          | PEX6          | YBL025W                 | RRN10         |
| YMR224C                                          | MRE11         | YPL018W                 | CTF19         |
| YOL148C                                          | SPT20         | YNL107W                 | YAF9          |
| YMR224C                                          | MRE11         | YPR046W                 | MCM16         |
| YDR146C                                          | SWI5          | YCR077C                 | PAT1          |
| YJL095W                                          | BCK1          | YML028W                 | TSA1          |
| YFR010W                                          | UBP6          | YBL025W                 | RRN10         |
| YGR270W                                          | YTA7          | YLR182W                 | SWI6          |
| YDR320C                                          | SWA2          | YAR014C                 | BUD14         |
| YBR200W                                          | BEM1          | YKR061W                 | KTR2          |
| YMR164C                                          | MSS11         | YPL256C                 | CLN2          |
| YNL041C                                          | COG6          | YGR105W                 | VMA21         |
| YGR104C                                          | SRB5          | YOL145C                 | CTR9          |
| YOR069W                                          | VPS5          | YEL053C                 | MAK10         |
| YNL069C                                          | RPL16B        | YPL195W                 | APL5          |
| YOR106W                                          | VAM3          | YOR109W                 | INP53         |

| Predictions at threshold level 0.80 continued... |               |                         |               |
|--------------------------------------------------|---------------|-------------------------|---------------|
| Gene1 of predicted pair                          |               | Gene2 of predicted pair |               |
| Systematic Name                                  | Standard Name | Systematic Name         | Standard Name |
| YMR224C                                          | MRE11         | YLR386W                 | VAC14         |
| YOL018C                                          | TLG2          | YNR032W                 | PPG1          |
| YLL039C                                          | UBI4          | YLR370C                 | ARC18         |
| YDR320C                                          | SWA2          | YER162C                 | RAD4          |
| YOR195W                                          | SLK19         | YDR289C                 | RTT103        |
| YLR441C                                          | RPS1A         | YMR152W                 | YIM1          |
| YPL024W                                          | RMI1          | YPL057C                 | SUR1          |
| YKL139W                                          | CTK1          | YCR077C                 | PAT1          |
| YDR309C                                          | GIC2          | YNL293W                 | MSB3          |
| YBR173C                                          | UMP1          | YDL077C                 | VAM6          |
| YPL161C                                          | BEM4          | YPL120W                 | VPS30         |
| YJL058C                                          | BIT61         | YBR107C                 | IML3          |
| YMR026C                                          | PEX12         | YER040W                 | GLN3          |
| YOR076C                                          | SKI7          | YOR001W                 | RRP6          |
| YKR061W                                          | KTR2          | YOR141C                 | ARP8          |
| YGL025C                                          | PGD1          | YNL031C                 | HHT2          |
| YLR061W                                          | RPL22A        | YLR360W                 | VPS38         |
| YJR099W                                          | YUH1          | YDR358W                 | GGA1          |
| YDL106C                                          | PHO2          | YDR146C                 | SWI5          |
| YNL041C                                          | COG6          | YNL107W                 | YAF9          |
| YDL020C                                          | RPN4          | YLR182W                 | SWI6          |
| YIL156W                                          | UBP7          | YIL148W                 | RPL40A        |
| YEL050C                                          | RML2          | YOR195W                 | SLK19         |
| YJL124C                                          | LSM1          | YER161C                 | SPT2          |
| YLR090W                                          | XDJ1          | YBR036C                 | CSG2          |
| YDR448W                                          | ADA2          | YBR111W-A               | SUS1          |
| YDL216C                                          | RR11          | YJR084W                 | CSN12         |
| YKL116C                                          | PRR1          | YOL081W                 | IRA2          |
| YML071C                                          | COG8          | YJL183W                 | MNN11         |

| Predictions at threshold level 0.80 continued... |               |                         |               |
|--------------------------------------------------|---------------|-------------------------|---------------|
| Gene1 of predicted pair                          |               | Gene2 of predicted pair |               |
| Systematic Name                                  | Standard Name | Systematic Name         | Standard Name |
| YDR439W                                          | LRS4          | YDR289C                 | RTT103        |
| YKL048C                                          | ELM1          | YGL003C                 | CDH1          |
| YJL172W                                          | CPS1          | YPR030W                 | CSR2          |
| YPL042C                                          | SSN3          | YOR106W                 | VAM3          |
| YNL215W                                          | IES2          | YPR046W                 | MCM16         |
| YHR013C                                          | ARD1          | YOR035C                 | SHE4          |
| YBR278W                                          | DPB3          | YDR146C                 | SWI5          |
| YPL161C                                          | BEM4          | YJL004C                 | SYS1          |
| YJL187C                                          | SWE1          | YOR327C                 | SNC2          |
| YKR072C                                          | SIS2          | YHR134W                 | WSS1          |
| YBR030W                                          | YBR030W       | YKL048C                 | ELM1          |
| YEL009C                                          | GCN4          | YDR225W                 | HTA1          |
| YNR052C                                          | POP2          | YNL206C                 | RTT106        |
| YKR059W                                          | TIF1          | YBR215W                 | HPC2          |
| YJL154C                                          | VPS35         | YDL226C                 | GCS1          |
| YGL175C                                          | SAE2          | YCR086W                 | CSM1          |
| YCR020C-A                                        | MAK31         | YKR030W                 | GMH1          |
| YGL174W                                          | BUD13         | YCL037C                 | SRO9          |
| YPL115C                                          | BEM3          | YHR061C                 | GIC1          |
| YDR448W                                          | ADA2          | YBR010W                 | HHT1          |
| YPL089C                                          | RLM1          | YBL101C                 | ECM21         |
| YDR477W                                          | SNF1          | YDL083C                 | RPS16B        |
| YPR017C                                          | DSS4          | YLR360W                 | VPS38         |
| YDR129C                                          | SAC6          | YMR116C                 | ASC1          |
| YPR046W                                          | MCM16         | YPL018W                 | CTF19         |
| YMR224C                                          | MRE11         | YKL048C                 | ELM1          |
| YGL054C                                          | ERV14         | YDR310C                 | SUM1          |
| YJR040W                                          | GEF1          | YNL051W                 | COG5          |
| YLL007C                                          | YLL007C       | YGL087C                 | MMS2          |

| Predictions at threshold level 0.80 continued... |               |                         |               |
|--------------------------------------------------|---------------|-------------------------|---------------|
| Gene1 of predicted pair                          |               | Gene2 of predicted pair |               |
| Systematic Name                                  | Standard Name | Systematic Name         | Standard Name |
| YNL307C                                          | MCK1          | YPR030W                 | CSR2          |
| YEL065W                                          | SIT1          | YJL183W                 | MNN11         |
| YPL037C                                          | EGD1          | YGL054C                 | ERV14         |
| YDR004W                                          | RAD57         | YGL100W                 | SEH1          |
| YLR079W                                          | SIC1          | YMR202W                 | ERG2          |
| YNL054W                                          | VAC7          | YDR183W                 | PLP1          |
| YMR153W                                          | NUP53         | YMR125W                 | STO1          |
| YJR032W                                          | CPR7          | YLR371W                 | ROM2          |
| YFR036W                                          | CDC26         | YJL183W                 | MNN11         |
| YLR061W                                          | RPL22A        | YBL047C                 | EDE1          |
| YJR032W                                          | CPR7          | YGL253W                 | HXK2          |
| YAL024C                                          | LTE1          | YER044C                 | ERG28         |
| YNL041C                                          | COG6          | YLR180W                 | SAM1          |
| YBR171W                                          | SEC66         | YHR039C-A               | VMA10         |
| YOR270C                                          | VPH1          | YOR066W                 | MSA1          |
| YBR107C                                          | IML3          | YDL185W                 | TFP1          |
| YGL003C                                          | CDH1          | YGR188C                 | BUB1          |
| YLR083C                                          | EMP70         | YML038C                 | YMD8          |
| YOR284W                                          | HUA2          | YKR030W                 | GMH1          |
| YPL120W                                          | VPS30         | YOL108C                 | INO4          |
| YBR172C                                          | SMY2          | YKL074C                 | MUD2          |
| YMR142C                                          | RPL13B        | YNL041C                 | COG6          |
| YDR320C                                          | SWA2          | YCL001W                 | RER1          |
| YPR084W                                          | YPR084W       | YDR137W                 | RGP1          |
| YAL024C                                          | LTE1          | YGL148W                 | ARO2          |
| YDR448W                                          | ADA2          | YNL030W                 | HHF2          |
| YPL018W                                          | CTF19         | YAL002W                 | VPS8          |
| YDR261C                                          | EXG2          | YPL195W                 | APL5          |
| YHL025W                                          | SNF6          | YER161C                 | SPT2          |

| Predictions at threshold level 0.80 continued... |               |                         |               |
|--------------------------------------------------|---------------|-------------------------|---------------|
| Gene1 of predicted pair                          |               | Gene2 of predicted pair |               |
| Systematic Name                                  | Standard Name | Systematic Name         | Standard Name |
| YNL297C                                          | MON2          | YER122C                 | GLO3          |
| YNL032W                                          | SIW14         | YPR046W                 | MCM16         |
| YOR132W                                          | VPS17         | YBL051C                 | PIN4          |
| YNL218W                                          | MGS1          | YLR135W                 | SLX4          |
| YML016C                                          | PPZ1          | YJL095W                 | BCK1          |
| YGR249W                                          | MGA1          | YDL083C                 | RPS16B        |
| YIR005W                                          | IST3          | YCR077C                 | PAT1          |
| YMR152W                                          | YIM1          | YJL183W                 | MNN11         |
| YBL008W                                          | HIR1          | YEL056W                 | HAT2          |
| YCL037C                                          | SRO9          | YGR105W                 | VMA21         |
| YGR270W                                          | YTA7          | YOR124C                 | UBP2          |
| YOR127W                                          | RGA1          | YBL047C                 | EDE1          |
| YBL021C                                          | HAP3          | YHR111W                 | UBA4          |
| YOR043W                                          | WHI2          | YMR037C                 | MSN2          |
| YNL201C                                          | PSY2          | YDR383C                 | NKP1          |
| YFR024C-A                                        | LSB3          | YPR171W                 | BSP1          |
| YHR098C                                          | SFB3          | YNL107W                 | YAF9          |
| YIR009W                                          | MSL1          | YBR114W                 | RAD16         |
| YGR105W                                          | VMA21         | YOL108C                 | INO4          |
| YDR245W                                          | MNN10         | YNL199C                 | GCR2          |
| YDR309C                                          | GIC2          | YCR086W                 | CSM1          |
| YIL076W                                          | SEC28         | YJL036W                 | SNX4          |
| YMR199W                                          | CLN1          | YBR084C-A               | RPL19A        |
| YOR014W                                          | RTS1          | YEL036C                 | ANP1          |
| YKL130C                                          | SHE2          | YBR130C                 | SHE3          |
| YPR154W                                          | PIN3          | YPR119W                 | CLB2          |
| YPR084W                                          | YPR084W       | YBR215W                 | HPC2          |
| YEL015W                                          | EDC3          | YBL066C                 | SEF1          |
| YGL134W                                          | PCL10         | YIL050W                 | PCL7          |

| Predictions at threshold level 0.80 continued... |               |                         |               |
|--------------------------------------------------|---------------|-------------------------|---------------|
| Gene1 of predicted pair                          |               | Gene2 of predicted pair |               |
| Systematic Name                                  | Standard Name | Systematic Name         | Standard Name |
| YDR484W                                          | VPS52         | YOL081W                 | IRA2          |
| YBR127C                                          | VMA2          | YNL259C                 | ATX1          |
| YMR153W                                          | NUP53         | YML001W                 | YPT7          |
| YBR200W                                          | BEM1          | YER096W                 | SHC1          |
| YOR023C                                          | AHC1          | YBR114W                 | RAD16         |
| YOR083W                                          | WHI5          | YDR318W                 | MCM21         |
| YJL154C                                          | VPS35         | YMR109W                 | MYO5          |
| YKL197C                                          | PEX1          | YNL329C                 | PEX6          |
| YBR036C                                          | CSG2          | YER040W                 | GLN3          |
| YGR100W                                          | MDR1          | YNL044W                 | YIP3          |
| YMR070W                                          | MOT3          | YBL047C                 | EDE1          |
| YNL218W                                          | MGS1          | YPL057C                 | SUR1          |
| YGR249W                                          | MGA1          | YFR036W                 | CDC26         |
| YJR032W                                          | CPR7          | YGL019W                 | CKB1          |
| YPR173C                                          | VPS4          | YJL004C                 | SYS1          |
| YNL058C                                          | YNL058C       | YLR180W                 | SAM1          |
| YPL246C                                          | RBD2          | YMR253C                 | YMR253C       |
| YPR029C                                          | APL4          | YDL192W                 | ARF1          |
| YPL001W                                          | HAT1          | YGL163C                 | RAD54         |
| YMR216C                                          | SKY1          | YGR020C                 | VMA7          |
| YGL135W                                          | RPL1B         | YLR192C                 | HCR1          |
| YGL223C                                          | COG1          | YCR053W                 | THR4          |
| YMR179W                                          | SPT21         | YML028W                 | TSA1          |
| YHR039C-A                                        | VMA10         | YGL151W                 | NUT1          |
| YPR051W                                          | MAK3          | YGL054C                 | ERV14         |
| YDL184C                                          | RPL41A        | YJL124C                 | LSM1          |
| YOR270C                                          | VPH1          | YLR320W                 | MMS22         |
| YOR270C                                          | VPH1          | YFL023W                 | BUD27         |
| YER042W                                          | MXR1          | YML028W                 | TSA1          |

| Predictions at threshold level 0.80 continued... |               |                         |               |
|--------------------------------------------------|---------------|-------------------------|---------------|
| Gene1 of predicted pair                          |               | Gene2 of predicted pair |               |
| Systematic Name                                  | Standard Name | Systematic Name         | Standard Name |
| YGL200C                                          | EMP24         | YDR363W-A               | SEM1          |
| YLR095C                                          | IOC2          | YHR156C                 | LIN1          |
| YJR056C                                          | YJR056C       | YHR060W                 | VMA22         |
| YBL103C                                          | RTG3          | YDR310C                 | SUM1          |
| YPL152W                                          | RRD2          | YLR182W                 | SWI6          |
| YML115C                                          | VAN1          | YOL121C                 | RPS19A        |
| YDR137W                                          | RGP1          | YMR214W                 | SCJ1          |
| YML013W                                          | UBX2          | YOR275C                 | RIM20         |
| YNL238W                                          | KEX2          | YDR153C                 | ENT5          |
| YBL101C                                          | ECM21         | YBL072C                 | RPS8A         |
| YOR270C                                          | VPH1          | YML001W                 | YPT7          |
| YPL050C                                          | MNN9          | YEL036C                 | ANP1          |
| YML112W                                          | CTK3          | YOR141C                 | ARP8          |
| YDR004W                                          | RAD57         | YFR010W                 | UBP6          |
| YJR032W                                          | CPR7          | YBR019C                 | GAL10         |
| YAL024C                                          | LTE1          | YDL020C                 | RPN4          |
| YDR293C                                          | SSD1          | YNL297C                 | MON2          |
| YKL025C                                          | PAN3          | YHR178W                 | STB5          |
| YOR080W                                          | DIA2          | YKL041W                 | VPS24         |
| YPL178W                                          | CBC2          | YGR059W                 | SPR3          |
| YKL007W                                          | CAP1          | YJL187C                 | SWE1          |
| YFR031C-A                                        | RPL2A         | YBR173C                 | UMP1          |
| YFR010W                                          | UBP6          | YOR290C                 | SNF2          |
| YMR179W                                          | SPT21         | YGR184C                 | UBR1          |
| YPL057C                                          | SUR1          | YPL161C                 | BEM4          |
| YBR200W                                          | BEM1          | YOR327C                 | SNC2          |
| YMR199W                                          | CLN1          | YHR111W                 | UBA4          |
| YGL147C                                          | RPL9A         | YPL161C                 | BEM4          |
| YNL025C                                          | SSN8          | YHL031C                 | GOS1          |

| Predictions at threshold level 0.80 continued... |               |                         |               |
|--------------------------------------------------|---------------|-------------------------|---------------|
| Gene1 of predicted pair                          |               | Gene2 of predicted pair |               |
| Systematic Name                                  | Standard Name | Systematic Name         | Standard Name |
| YNL069C                                          | RPL16B        | YPL234C                 | TFP3          |
| YLR360W                                          | VPS38         | YMR198W                 | CIK1          |
| YJL036W                                          | SNX4          | YJL004C                 | SYS1          |
| YKR001C                                          | VPS1          | YGL054C                 | ERV14         |
| YKL139W                                          | CTK1          | YOR312C                 | RPL20B        |
| YNL069C                                          | RPL16B        | YEL053C                 | MAK10         |
| YGR270W                                          | YTA7          | YEL013W                 | VAC8          |
| YNR072W                                          | HXT17         | YJL095W                 | BCK1          |
| YGR188C                                          | BUB1          | YGL252C                 | RTG2          |
| YDR108W                                          | GSG1          | YGR020C                 | VMA7          |
| YDR335W                                          | MSN5          | YOL081W                 | IRA2          |
| YPR154W                                          | PIN3          | YPL249C                 | GYP5          |
| YOR327C                                          | SNC2          | YLR425W                 | TUS1          |
| YOR066W                                          | MSA1          | YPL137C                 | GIP3          |
| YIL034C                                          | CAP2          | YER114C                 | BOI2          |
| YLR079W                                          | SIC1          | YJR035W                 | RAD26         |
| YIL076W                                          | SEC28         | YIR005W                 | IST3          |
| YIL053W                                          | RHR2          | YOR066W                 | MSA1          |
| YGR261C                                          | APL6          | YPL037C                 | EGD1          |
| YJR140C                                          | HIR3          | YCR086W                 | CSM1          |
| YML115C                                          | VAN1          | YGL212W                 | VAM7          |
| YEL009C                                          | GCN4          | YHL025W                 | SNF6          |
| YLR360W                                          | VPS38         | YGR270W                 | YTA7          |
| YNL243W                                          | SLA2          | YPL240C                 | HSP82         |
| YGR261C                                          | APL6          | YOR132W                 | VPS17         |
| YGR270W                                          | YTA7          | YIL008W                 | URM1          |
| YGL249W                                          | ZIP2          | YPR119W                 | CLB2          |
| YLR410W                                          | VIP1          | YNL225C                 | CNM67         |
| YLR170C                                          | APS1          | YDL192W                 | ARF1          |



| Predictions at threshold level 0.80 continued... |               |                         |               |
|--------------------------------------------------|---------------|-------------------------|---------------|
| Gene1 of predicted pair                          |               | Gene2 of predicted pair |               |
| Systematic Name                                  | Standard Name | Systematic Name         | Standard Name |
| YOR039W                                          | CKB2          | YMR055C                 | BUB2          |
| YOR001W                                          | RRP6          | YDR363W-A               | SEM1          |
| YHR178W                                          | STB5          | YPL161C                 | BEM4          |
| YDL002C                                          | NHP10         | YDR363W-A               | SEM1          |
| YKL214C                                          | YRA2          | YML062C                 | MFT1          |
| YOR270C                                          | VPH1          | YDL185W                 | TFP1          |
| YFL023W                                          | BUD27         | YLR093C                 | NYV1          |
| YMR311C                                          | GLC8          | YAR014C                 | BUD14         |
| YGR019W                                          | UGA1          | YNL288W                 | CAF40         |
| YNL325C                                          | FIG4          | YJR032W                 | CPR7          |
| YKR035W-A                                        | DID2          | YML071C                 | COG8          |
| YHR016C                                          | YSC84         | YHR114W                 | BZZ1          |
| YNL106C                                          | INP52         | YLR399C                 | BDF1          |
| YIL159W                                          | BNR1          | YMR032W                 | HOF1          |
| YNL032W                                          | SIW14         | YJR084W                 | CSN12         |
| YCL029C                                          | BIK1          | YIL033C                 | BCY1          |
| YGL115W                                          | SNF4          | YNL076W                 | MKS1          |
| YDL006W                                          | PTC1          | YLR309C                 | IMH1          |
| YJL004C                                          | SYS1          | YOL018C                 | TLG2          |
| YEL065W                                          | SIT1          | YER144C                 | UBP5          |
| YPR018W                                          | RLF2          | YMR231W                 | PEP5          |
| YNL307C                                          | MCK1          | YJR035W                 | RAD26         |
| YPR084W                                          | YPR084W       | YGR072W                 | UPF3          |
| YPR036W                                          | VMA13         | YHR060W                 | VMA22         |
| YMR284W                                          | YKU70         | YBL079W                 | NUP170        |
| YMR026C                                          | PEX12         | YML071C                 | COG8          |
| YOL054W                                          | PSH1          | YGR188C                 | BUB1          |
| YPL057C                                          | SUR1          | YHR060W                 | VMA22         |
| YML016C                                          | PPZ1          | YDR155C                 | CPR1          |

| Predictions at threshold level 0.80 continued... |               |                         |               |
|--------------------------------------------------|---------------|-------------------------|---------------|
| Gene1 of predicted pair                          |               | Gene2 of predicted pair |               |
| Systematic Name                                  | Standard Name | Systematic Name         | Standard Name |
| YDR076W                                          | RAD55         | YMR038C                 | CCS1          |
| YNL025C                                          | SSN8          | YBR215W                 | HPC2          |
| YBR108W                                          | YBR108W       | YOR043W                 | WHI2          |
| YOR141C                                          | ARP8          | YNL059C                 | ARP5          |
| YMR164C                                          | MSS11         | YFL047W                 | RGD2          |
| YDR443C                                          | SSN2          | YEL036C                 | ANP1          |
| YJR040W                                          | GEF1          | YNL107W                 | YAF9          |
| YDR320C                                          | SWA2          | YPL105C                 | YPL105C       |
| YPL096C-A                                        | ERI1          | YPL240C                 | HSP82         |
| YKL048C                                          | ELM1          | YLR182W                 | SWI6          |
| YKR020W                                          | VPS51         | YOR327C                 | SNC2          |
| YDR310C                                          | SUM1          | YLR180W                 | SAM1          |
| YPL246C                                          | RBD2          | YHR114W                 | BZZ1          |
| YDR378C                                          | LSM6          | YLR254C                 | NDL1          |
| YIL148W                                          | RPL40A        | YKL117W                 | SBA1          |
| YGL200C                                          | EMP24         | YHL002W                 | HSE1          |
| YJL053W                                          | PEP8          | YEL053C                 | MAK10         |
| YHR178W                                          | STB5          | YHR200W                 | RPN10         |
| YKR048C                                          | NAP1          | YJL095W                 | BCK1          |
| YLR381W                                          | CTF3          | YDL047W                 | SIT4          |
| YHR205W                                          | SCH9          | YJR075W                 | HOC1          |
| YGL033W                                          | HOP2          | YMR214W                 | SCJ1          |
| YKR099W                                          | BAS1          | YBR171W                 | SEC66         |
| YGR135W                                          | PRE9          | YJL140W                 | RPB4          |
| YNL329C                                          | PEX6          | YOR312C                 | RPL20B        |
| YGL078C                                          | DBP3          | YNL041C                 | COG6          |
| YGR270W                                          | YTA7          | YPL161C                 | BEM4          |
| YDL083C                                          | RPS16B        | YDL192W                 | ARF1          |
| YPR051W                                          | MAK3          | YOL018C                 | TLG2          |

| Predictions at threshold level 0.80 continued... |               |                         |               |
|--------------------------------------------------|---------------|-------------------------|---------------|
| Gene1 of predicted pair                          |               | Gene2 of predicted pair |               |
| Systematic Name                                  | Standard Name | Systematic Name         | Standard Name |
| YMR198W                                          | CIK1          | YLR381W                 | CTF3          |
| YKL116C                                          | PRR1          | YDR137W                 | RGP1          |
| YLR018C                                          | POM34         | YGR105W                 | VMA21         |
| YGR056W                                          | RSC1          | YHR056C                 | RSC30         |
| YDR155C                                          | CPR1          | YGL253W                 | HXK2          |
| YNL291C                                          | MID1          | YMR216C                 | SKY1          |
| YNL087W                                          | TCB2          | YDR310C                 | SUM1          |
| YNL139C                                          | RLR1          | YMR273C                 | ZDS1          |
| YHR178W                                          | STB5          | YHR039C-A               | VMA10         |
| YBR108W                                          | YBR108W       | YLR371W                 | ROM2          |
| YBL103C                                          | RTG3          | YNL041C                 | COG6          |
| YOR033C                                          | EXO1          | YLR410W                 | VIP1          |
| YGL174W                                          | BUD13         | YER122C                 | GLO3          |
| YNL106C                                          | INP52         | YPR046W                 | MCM16         |
| YNL243W                                          | SLA2          | YOR332W                 | VMA4          |
| YBR171W                                          | SEC66         | YOL121C                 | RPS19A        |
| YMR198W                                          | CIK1          | YER122C                 | GLO3          |
| YNL307C                                          | MCK1          | YEL060C                 | PRB1          |
| YER120W                                          | SCS2          | YOR327C                 | SNC2          |
| YNR072W                                          | HXT17         | YBL025W                 | RRN10         |
| YIL053W                                          | RHR2          | YDL192W                 | ARF1          |
| YBR200W                                          | BEM1          | YJL006C                 | CTK2          |
| YMR016C                                          | SOK2          | YER162C                 | RAD4          |
| YPL234C                                          | TFP3          | YOL018C                 | TLG2          |
| YBL008W                                          | HIR1          | YJL127C                 | SPT10         |
| YMR142C                                          | RPL13B        | YNL325C                 | FIG4          |
| YPR051W                                          | MAK3          | YPL195W                 | APL5          |
| YBR280C                                          | SAF1          | YER040W                 | GLN3          |
| YML102W                                          | CAC2          | YMR231W                 | PEP5          |

| Predictions at threshold level 0.80 continued... |               |                         |               |
|--------------------------------------------------|---------------|-------------------------|---------------|
| Gene1 of predicted pair                          |               | Gene2 of predicted pair |               |
| Systematic Name                                  | Standard Name | Systematic Name         | Standard Name |
| YDR484W                                          | VPS52         | YPL045W                 | VPS16         |
| YAL024C                                          | LTE1          | YNL248C                 | RPA49         |
| YMR153W                                          | NUP53         | YFL023W                 | BUD27         |
| YBR274W                                          | CHK1          | YGL019W                 | CKB1          |
| YBL058W                                          | SHP1          | YGL078C                 | DBP3          |
| YGR261C                                          | APL6          | YDR202C                 | RAV2          |
| YML095C                                          | RAD10         | YBR171W                 | SEC66         |
| YDR443C                                          | SSN2          | YLR425W                 | TUS1          |
| YPL253C                                          | VIK1          | YOR358W                 | HAP5          |
| YHR060W                                          | VMA22         | YMR311C                 | GLC8          |
| YLR095C                                          | IOC2          | YNL087W                 | TCB2          |
| YKL025C                                          | PAN3          | YMR172W                 | HOT1          |
| YGL054C                                          | ERV14         | YAL007C                 | ERP2          |
| YGL147C                                          | RPL9A         | YHR200W                 | RPN10         |
| YBR195C                                          | MSI1          | YBR036C                 | CSG2          |
| YNL201C                                          | PSY2          | YGL163C                 | RAD54         |
| YNL218W                                          | MGS1          | YNL016W                 | PUB1          |
| YHR200W                                          | RPN10         | YJL183W                 | MNN11         |
| YHR200W                                          | RPN10         | YPR030W                 | CSR2          |
| YKL139W                                          | CTK1          | YJL095W                 | BCK1          |
| YGR072W                                          | UPF3          | YOL018C                 | TLG2          |
| YMR109W                                          | MYO5          | YGR188C                 | BUB1          |
| YIL036W                                          | CST6          | YPR046W                 | MCM16         |
| YHL031C                                          | GOS1          | YPR032W                 | SRO7          |
| YDR245W                                          | MNN10         | YER122C                 | GLO3          |
| YDR358W                                          | GGA1          | YLR180W                 | SAM1          |
| YHR178W                                          | STB5          | YGL161C                 | YIP5          |
| YGL163C                                          | RAD54         | YJR090C                 | GRR1          |
| YGL060W                                          | YBP2          | YDR171W                 | HSP42         |

| Predictions at threshold level 0.80 continued... |               |                         |               |
|--------------------------------------------------|---------------|-------------------------|---------------|
| Gene1 of predicted pair                          |               | Gene2 of predicted pair |               |
| Systematic Name                                  | Standard Name | Systematic Name         | Standard Name |
| YML016C                                          | PPZ1          | YEL056W                 | HAT2          |
| YBR127C                                          | VMA2          | YLR447C                 | VMA6          |
| YNL106C                                          | INP52         | YKL110C                 | KTI12         |
| YNL307C                                          | MCK1          | YLR410W                 | VIP1          |
| YLR381W                                          | CTF3          | YBR171W                 | SEC66         |
| YBR215W                                          | HPC2          | YPR120C                 | CLB5          |
| YPL178W                                          | CBC2          | YML057W                 | CMP2          |
| YGL060W                                          | YBP2          | YPL042C                 | SSN3          |
| YCL010C                                          | SGF29         | YGL252C                 | RTG2          |
| YLR386W                                          | VAC14         | YDR318W                 | MCM21         |
| YBL025W                                          | RRN10         | YBR036C                 | CSG2          |
| YER001W                                          | MNN1          | YDL223C                 | HBT1          |
| YLR315W                                          | NKP2          | YOR308C                 | SNU66         |
| YNL068C                                          | FKH2          | YNL116W                 | DMA2          |
| YOR047C                                          | STD1          | YGL252C                 | RTG2          |
| YAL024C                                          | LTE1          | YCR065W                 | HCM1          |
| YBR194W                                          | SOY1          | YDR200C                 | VPS64         |
| YBR030W                                          | YBR030W       | YKL126W                 | YPK1          |
| YLR452C                                          | SST2          | YMR230W                 | RPS10B        |
| YGR072W                                          | UPF3          | YHR134W                 | WSS1          |
| YLR337C                                          | VRP1          | YGR054W                 | YGR054W       |
| YDR254W                                          | CHL4          | YGL250W                 | RMR1          |
| YNL016W                                          | PUB1          | YBL079W                 | NUP170        |
| YKR014C                                          | YPT52         | YOR327C                 | SNC2          |
| YMR095C                                          | SNO1          | YJL095W                 | BCK1          |
| YOR109W                                          | INP53         | YMR054W                 | STV1          |
| YOR035C                                          | SHE4          | YNL076W                 | MKS1          |
| YGL060W                                          | YBP2          | YJL060W                 | BNA3          |
| YOR127W                                          | RGA1          | YDR254W                 | CHL4          |

| Predictions at threshold level 0.80 continued... |               |                         |               |
|--------------------------------------------------|---------------|-------------------------|---------------|
| Gene1 of predicted pair                          |               | Gene2 of predicted pair |               |
| Systematic Name                                  | Standard Name | Systematic Name         | Standard Name |
| YNL307C                                          | MCK1          | YOR368W                 | RAD17         |
| YBR107C                                          | IML3          | YLR447C                 | VMA6          |
| YNL054W                                          | VAC7          | YDR289C                 | RTT103        |
| YMR231W                                          | PEP5          | YPL195W                 | APL5          |
| YPL161C                                          | BEM4          | YJL190C                 | RPS22A        |
| YNL215W                                          | IES2          | YOR141C                 | ARP8          |
| YBL008W                                          | HIR1          | YOR290C                 | SNF2          |
| YDR378C                                          | LSM6          | YKL041W                 | VPS24         |
| YFR031C-A                                        | RPL2A         | YLR093C                 | NYV1          |
| YGR252W                                          | GCN5          | YPL158C                 | YPL158C       |
| YBL008W                                          | HIR1          | YDR310C                 | SUM1          |
| YMR153W                                          | NUP53         | YMR273C                 | ZDS1          |
| YDR293C                                          | SSD1          | YBL021C                 | HAP3          |
| YCR020C-A                                        | MAK31         | YNL041C                 | COG6          |
| YHL031C                                          | GOS1          | YLR093C                 | NYV1          |
| YNL291C                                          | MID1          | YBR107C                 | IML3          |
| YHR081W                                          | LRP1          | YLR398C                 | SKI2          |
| YDL116W                                          | NUP84         | YOL081W                 | IRA2          |
| YNL236W                                          | SIN4          | YLR410W                 | VIP1          |
| YPL037C                                          | EGD1          | YPR030W                 | CSR2          |
| YOR270C                                          | VPH1          | YOR327C                 | SNC2          |
| YDR477W                                          | SNF1          | YOR008C                 | SLG1          |
| YBR194W                                          | SOY1          | YJL006C                 | CTK2          |
| YJL006C                                          | CTK2          | YOL054W                 | PSH1          |
| YBL058W                                          | SHP1          | YDL223C                 | HBT1          |
| YJL136C                                          | RPS21B        | YKL032C                 | IXR1          |
| YJR135C                                          | MCM22         | YDR076W                 | RAD55         |
| YER162C                                          | RAD4          | YBR280C                 | SAF1          |
| YDL116W                                          | NUP84         | YBR017C                 | KAP104        |

| Predictions at threshold level 0.80 continued... |               |                         |               |
|--------------------------------------------------|---------------|-------------------------|---------------|
| Gene1 of predicted pair                          |               | Gene2 of predicted pair |               |
| Systematic Name                                  | Standard Name | Systematic Name         | Standard Name |
| YML115C                                          | VAN1          | YEL044W                 | IES6          |
| YPL161C                                          | BEM4          | YMR214W                 | SCJ1          |
| YPR120C                                          | CLB5          | YDR071C                 | PAA1          |
| YKL139W                                          | CTK1          | YPL018W                 | CTF19         |
| YBL016W                                          | FUS3          | YBR083W                 | TEC1          |
| YER116C                                          | SLX8          | YOL081W                 | IRA2          |
| YDL077C                                          | VAM6          | YNL107W                 | YAF9          |
| YBL067C                                          | UBP13         | YMR089C                 | YTA12         |
| YPR046W                                          | MCM16         | YAR014C                 | BUD14         |
| YKL139W                                          | CTK1          | YHR115C                 | DMA1          |
| YPR089W                                          | YPR089W       | YHR012W                 | VPS29         |
| YDL077C                                          | VAM6          | YAR014C                 | BUD14         |
| YHR039C-A                                        | VMA10         | YDR289C                 | RTT103        |
| YGR104C                                          | SRB5          | YOR308C                 | SNU66         |
| YOR001W                                          | RRP6          | YPL057C                 | SUR1          |
| YIL034C                                          | CAP2          | YPL256C                 | CLN2          |
| YBR200W                                          | BEM1          | YOR043W                 | WHI2          |
| YCL037C                                          | SRO9          | YKR001C                 | VPS1          |
| YPR036W                                          | VMA13         | YDL013W                 | SLX5          |
| YDR484W                                          | VPS52         | YNL076W                 | MKS1          |
| YNL087W                                          | TCB2          | YLR371W                 | ROM2          |
| YPL024W                                          | RMI1          | YNL297C                 | MON2          |
| YPL161C                                          | BEM4          | YLR398C                 | SKI2          |
| YDL223C                                          | HBT1          | YDR310C                 | SUM1          |
| YDR144C                                          | MKC7          | YPL018W                 | CTF19         |
| YGL094C                                          | PAN2          | YLR085C                 | ARP6          |
| YDL185W                                          | TFP1          | YPL018W                 | CTF19         |
| YLR216C                                          | CPR6          | YPR046W                 | MCM16         |
| YIL148W                                          | RPL40A        | YBL079W                 | NUP170        |

| Predictions at threshold level 0.80 continued... |               |                         |               |
|--------------------------------------------------|---------------|-------------------------|---------------|
| Gene1 of predicted pair                          |               | Gene2 of predicted pair |               |
| Systematic Name                                  | Standard Name | Systematic Name         | Standard Name |
| YGL200C                                          | EMP24         | YJL183W                 | MNN11         |
| YPL259C                                          | APM1          | YOR036W                 | PEP12         |
| YOR112W                                          | CEX1          | YGR020C                 | VMA7          |
| YPL161C                                          | BEM4          | YGL124C                 | MON1          |
| YBR107C                                          | IML3          | YEL056W                 | HAT2          |
| YGL087C                                          | MMS2          | YBR200W                 | BEM1          |
| YMR039C                                          | SUB1          | YLR288C                 | MEC3          |
| YPL115C                                          | BEM3          | YNL166C                 | BNI5          |
| YOL030W                                          | GAS5          | YLR313C                 | SPH1          |
| YOR275C                                          | RIM20         | YOL081W                 | IRA2          |
| YIL076W                                          | SEC28         | YMR153W                 | NUP53         |
| YKR061W                                          | KTR2          | YDR318W                 | MCM21         |
| YKL213C                                          | DOA1          | YER139C                 | YER139C       |
| YGL223C                                          | COG1          | YCL037C                 | SRO9          |
| YBR020W                                          | GAL1          | YDR363W-A               | SEM1          |
| YLL026W                                          | HSP104        | YJR032W                 | CPR7          |
| YJL124C                                          | LSM1          | YKL110C                 | KTI12         |
| YMR172W                                          | HOT1          | YHL002W                 | HSE1          |
| YMR055C                                          | BUB2          | YDR318W                 | MCM21         |
| YLR079W                                          | SIC1          | YBR200W                 | BEM1          |
| YNL025C                                          | SSN8          | YFR010W                 | UBP6          |
| YHR200W                                          | RPN10         | YFR036W                 | CDC26         |
| YNL032W                                          | SIW14         | YLR093C                 | NYV1          |
| YBR171W                                          | SEC66         | YMR311C                 | GLC8          |
| YLR337C                                          | VRP1          | YBL067C                 | UBP13         |
| YDL226C                                          | GCS1          | YNL107W                 | YAF9          |
| YCR077C                                          | PAT1          | YDR310C                 | SUM1          |
| YKR020W                                          | VPS51         | YKR048C                 | NAP1          |
| YKL139W                                          | CTK1          | YOR290C                 | SNF2          |



| Predictions at threshold level 0.80 continued... |               |                         |               |
|--------------------------------------------------|---------------|-------------------------|---------------|
| Gene1 of predicted pair                          |               | Gene2 of predicted pair |               |
| Systematic Name                                  | Standard Name | Systematic Name         | Standard Name |
| YOL145C                                          | CTR9          | YPL161C                 | BEM4          |
| YOL018C                                          | TLG2          | YNL127W                 | FAR11         |
| YBR215W                                          | HPC2          | YHR010W                 | RPL27A        |
| YDR137W                                          | RGP1          | YLR093C                 | NYV1          |
| YNR052C                                          | POP2          | YIL103W                 | DPH1          |
| YGL087C                                          | MMS2          | YBR171W                 | SEC66         |
| YPR017C                                          | DSS4          | YGL115W                 | SNF4          |
| YHR134W                                          | WSS1          | YLR381W                 | CTF3          |
| YBR173C                                          | UMP1          | YLR094C                 | GIS3          |
| YMR116C                                          | ASC1          | YJL183W                 | MNN11         |
| YOR332W                                          | VMA4          | YDR202C                 | RAV2          |
| YDR448W                                          | ADA2          | YGL252C                 | RTG2          |
| YCR081W                                          | SRB8          | YOR140W                 | SFL1          |
| YGL158W                                          | RCK1          | YPL058C                 | PDR12         |
| YOR043W                                          | WHI2          | YGL003C                 | CDH1          |
| YDL013W                                          | SLX5          | YKL101W                 | HSL1          |
| YOR327C                                          | SNC2          | YBR036C                 | CSG2          |
| YHL027W                                          | RIM101        | YJL183W                 | MNN11         |
| YLR452C                                          | SST2          | YNL107W                 | YAF9          |
| YDL116W                                          | NUP84         | YDR207C                 | UME6          |
| YDR477W                                          | SNF1          | YOR270C                 | VPH1          |
| YGL147C                                          | RPL9A         | YBR200W                 | BEM1          |
| YGL066W                                          | SGF73         | YLR150W                 | STM1          |
| YNL264C                                          | PDR17         | YOR101W                 | RAS1          |
| YMR153W                                          | NUP53         | YDR261C                 | EXG2          |
| YKL139W                                          | CTK1          | YNL238W                 | KEX2          |
| YPR046W                                          | MCM16         | YNL116W                 | DMA2          |
| YOR270C                                          | VPH1          | YPL195W                 | APL5          |
| YML071C                                          | COG8          | YGL124C                 | MON1          |

| Predictions at threshold level 0.80 continued... |               |                         |               |
|--------------------------------------------------|---------------|-------------------------|---------------|
| Gene1 of predicted pair                          |               | Gene2 of predicted pair |               |
| Systematic Name                                  | Standard Name | Systematic Name         | Standard Name |
| YML001W                                          | YPT7          | YAR014C                 | BUD14         |
| YFR010W                                          | UBP6          | YNL291C                 | MID1          |
| YGR003W                                          | CUL3          | YPR066W                 | UBA3          |
| YMR216C                                          | SKY1          | YKR020W                 | VPS51         |
| YDR207C                                          | UME6          | YOL081W                 | IRA2          |
| YML103C                                          | NUP188        | YGR081C                 | SLX9          |
| YDR383C                                          | NKP1          | YFR036W                 | CDC26         |
| YMR152W                                          | YIM1          | YER122C                 | GLO3          |
| YFR036W                                          | CDC26         | YMR214W                 | SCJ1          |
| YDL155W                                          | CLB3          | YOL091W                 | SPO21         |
| YBR215W                                          | HPC2          | YCR031C                 | RPS14A        |
| YBR200W                                          | BEM1          | YER122C                 | GLO3          |
| YMR224C                                          | MRE11         | YNL079C                 | TPM1          |
| YFL023W                                          | BUD27         | YOR066W                 | MSA1          |
| YBR200W                                          | BEM1          | YDL056W                 | MBP1          |
| YGL066W                                          | SGF73         | YJL095W                 | BCK1          |
| YLR386W                                          | VAC14         | YJL006C                 | CTK2          |
| YOR080W                                          | DIA2          | YBR107C                 | IML3          |
| YLR384C                                          | IKI3          | YBL071W-A               | KTI11         |
| YAL024C                                          | LTE1          | YMR038C                 | CCS1          |
| YIL156W                                          | UBP7          | YFL047W                 | RGD2          |
| YKR048C                                          | NAP1          | YIL133C                 | RPL16A        |
| YDL192W                                          | ARF1          | YOL081W                 | IRA2          |
| YML095C                                          | RAD10         | YLR370C                 | ARC18         |
| YDR318W                                          | MCM21         | YGL151W                 | NUT1          |
| YBL072C                                          | RPS8A         | YLR370C                 | ARC18         |
| YJL036W                                          | SNX4          | YAL002W                 | VPS8          |
| YOR140W                                          | SFL1          | YGL025C                 | PGD1          |
| YER161C                                          | SPT2          | YLR350W                 | ORM2          |

| Predictions at threshold level 0.80 continued... |               |                         |               |
|--------------------------------------------------|---------------|-------------------------|---------------|
| Gene1 of predicted pair                          |               | Gene2 of predicted pair |               |
| Systematic Name                                  | Standard Name | Systematic Name         | Standard Name |
| YJL172W                                          | CPS1          | YBL103C                 | RTG3          |
| YNL031C                                          | HHT2          | YER068W                 | MOT2          |
| YOR109W                                          | INP53         | YDL192W                 | ARF1          |
| YBR200W                                          | BEM1          | YDR144C                 | MKC7          |
| YGR241C                                          | YAP1802       | YJL029C                 | VPS53         |
| YGR020C                                          | VMA7          | YER120W                 | SCS2          |
| YKR061W                                          | KTR2          | YLR315W                 | NKP2          |
| YMR224C                                          | MRE11         | YKR099W                 | BAS1          |
| YOR371C                                          | GPB1          | YGL121C                 | GPG1          |
| YLR079W                                          | SIC1          | YOL091W                 | SPO21         |
| YBL051C                                          | PIN4          | YNL166C                 | BNI5          |
| YDR296W                                          | MHR1          | YPL248C                 | GAL4          |
| YNL218W                                          | MGS1          | YPL022W                 | RAD1          |
| YNL069C                                          | RPL16B        | YOR127W                 | RGA1          |
| YML103C                                          | NUP188        | YPL152W                 | RRD2          |
| YGL212W                                          | VAM7          | YPL050C                 | MNN9          |
| YMR125W                                          | STO1          | YPL246C                 | RBD2          |
| YGR020C                                          | VMA7          | YCL037C                 | SRO9          |
| YLR399C                                          | BDF1          | YJR060W                 | CBF1          |
| YML095C                                          | RAD10         | YMR109W                 | MYO5          |
| YLR083C                                          | EMP70         | YJL154C                 | VPS35         |
| YOL111C                                          | MDY2          | YOL121C                 | RPS19A        |
| YCR081W                                          | SRB8          | YDR245W                 | MNN10         |
| YBR228W                                          | SLX1          | YJR035W                 | RAD26         |
| YLR119W                                          | SRN2          | YDR484W                 | VPS52         |
| YNL288W                                          | CAF40         | YKL048C                 | ELM1          |
| YOR132W                                          | VPS17         | YEL042W                 | GDA1          |
| YKL139W                                          | CTK1          | YOR043W                 | WHI2          |
| YNL307C                                          | MCK1          | YDR207C                 | UME6          |

| Predictions at threshold level 0.80 continued... |               |                         |               |
|--------------------------------------------------|---------------|-------------------------|---------------|
| Gene1 of predicted pair                          |               | Gene2 of predicted pair |               |
| Systematic Name                                  | Standard Name | Systematic Name         | Standard Name |
| YFR036W                                          | CDC26         | YER139C                 | YER139C       |
| YHR156C                                          | LIN1          | YPL137C                 | GIP3          |
| YCR088W                                          | ABP1          | YOR367W                 | SCP1          |
| YAL024C                                          | LTE1          | YIR005W                 | IST3          |
| YCL001W                                          | RER1          | YJR033C                 | RAV1          |
| YLR320W                                          | MMS22         | YMR133W                 | REC114        |
| YER162C                                          | RAD4          | YKR030W                 | GMH1          |
| YGL135W                                          | RPL1B         | YGL215W                 | CLG1          |
| YKR057W                                          | RPS21A        | YPL161C                 | BEM4          |
| YNL016W                                          | PUB1          | YGL031C                 | RPL24A        |
| YNL201C                                          | PSY2          | YFR030W                 | MET10         |
| YML001W                                          | YPT7          | YNL238W                 | KEX2          |
| YML095C                                          | RAD10         | YDL155W                 | CLB3          |
| YOR076C                                          | SKI7          | YNL106C                 | INP52         |
| YHR200W                                          | RPN10         | YAL002W                 | VPS8          |
| YLR386W                                          | VAC14         | YCR053W                 | THR4          |
| YMR142C                                          | RPL13B        | YER122C                 | GLO3          |
| YHR160C                                          | PEX18         | YGL153W                 | PEX14         |
| YGL115W                                          | SNF4          | YLR370C                 | ARC18         |
| YNR052C                                          | POP2          | YAR014C                 | BUD14         |
| YDR477W                                          | SNF1          | YLR441C                 | RPS1A         |
| YHR060W                                          | VMA22         | YML038C                 | YMD8          |
| YDR443C                                          | SSN2          | YJL172W                 | CPS1          |
| YPR017C                                          | DSS4          | YJL053W                 | PEP8          |
| YGL212W                                          | VAM7          | YNL041C                 | COG6          |
| YFR031C-A                                        | RPL2A         | YDL223C                 | HBT1          |
| YLR452C                                          | SST2          | YNL147W                 | LSM7          |
| YAL051W                                          | OAF1          | YJL124C                 | LSM1          |
| YDR484W                                          | VPS52         | YPL137C                 | GIP3          |

| Predictions at threshold level 0.80 continued... |               |                         |               |
|--------------------------------------------------|---------------|-------------------------|---------------|
| Gene1 of predicted pair                          |               | Gene2 of predicted pair |               |
| Systematic Name                                  | Standard Name | Systematic Name         | Standard Name |
| YCL001W                                          | RER1          | YEL043W                 | YEL043W       |
| YHR178W                                          | STB5          | YAR014C                 | BUD14         |
| YNL288W                                          | CAF40         | YGL151W                 | NUT1          |
| YEL009C                                          | GCN4          | YPL129W                 | TAF14         |
| YKL116C                                          | PRR1          | YLR180W                 | SAM1          |
| YDL160C                                          | DHH1          | YBR089C-A               | NHP6B         |
| YBR131W                                          | CCZ1          | YBR082C                 | UBC4          |
| YJL154C                                          | VPS35         | YGR105W                 | VMA21         |
| YPL037C                                          | EGD1          | YPL234C                 | TFP3          |
| YOR109W                                          | INP53         | YNL107W                 | YAF9          |
| YOR337W                                          | TEA1          | YLR320W                 | MMS22         |
| YPL246C                                          | RBD2          | YPL256C                 | CLN2          |
| YML115C                                          | VAN1          | YBR181C                 | RPS6B         |
| YDR253C                                          | MET32         | YPL022W                 | RAD1          |
| YLR435W                                          | TSR2          | YDR310C                 | SUM1          |
| YDR129C                                          | SAC6          | YGL095C                 | VPS45         |
| YML071C                                          | COG8          | YNL076W                 | MKS1          |
| YLR441C                                          | RPS1A         | YPR030W                 | CSR2          |
| YER109C                                          | FLO8          | YBR083W                 | TEC1          |
| YMR199W                                          | CLN1          | YML057W                 | CMP2          |
| YNL087W                                          | TCB2          | YOR066W                 | MSA1          |
| YOR290C                                          | SNF2          | YPR036W                 | VMA13         |
| YNL215W                                          | IES2          | YLR254C                 | NDL1          |
| YIL034C                                          | CAP2          | YDR309C                 | GIC2          |
| YLR441C                                          | RPS1A         | YHR200W                 | RPN10         |
| YOR290C                                          | SNF2          | YPL195W                 | APL5          |
| YCR020C-A                                        | MAK31         | YGL115W                 | SNF4          |
| YIL076W                                          | SEC28         | YKR035W-A               | DID2          |
| YLR292C                                          | SEC72         | YLR447C                 | VMA6          |

| Predictions at threshold level 0.80 continued... |               |                         |               |
|--------------------------------------------------|---------------|-------------------------|---------------|
| Gene1 of predicted pair                          |               | Gene2 of predicted pair |               |
| Systematic Name                                  | Standard Name | Systematic Name         | Standard Name |
| YBR171W                                          | SEC66         | YLR425W                 | TUS1          |
| YDR174W                                          | HMO1          | YMR224C                 | MRE11         |
| YGR270W                                          | YTA7          | YJR060W                 | CBF1          |
| YGL016W                                          | KAP122        | YKR024C                 | DBP7          |
| YMR026C                                          | PEX12         | YLR452C                 | SST2          |
| YLR234W                                          | TOP3          | YKL068W                 | NUP100        |
| YAL024C                                          | LTE1          | YPR120C                 | CLB5          |
| YCL037C                                          | SRO9          | YGL054C                 | ERV14         |
| YML058W                                          | SML1          | YGL175C                 | SAE2          |
| YDR129C                                          | SAC6          | YJL183W                 | MNN11         |
| YGL153W                                          | PEX14         | YDL155W                 | CLB3          |
| YIL072W                                          | HOP1          | YLR263W                 | RED1          |
| YPL137C                                          | GIP3          | YGL124C                 | MON1          |
| YEL050C                                          | RML2          | YDL155W                 | CLB3          |
| YCR066W                                          | RAD18         | YMR038C                 | CCS1          |
| YBL027W                                          | RPL19B        | YIR009W                 | MSL1          |
| YGR249W                                          | MGA1          | YOL111C                 | MDY2          |
| YKL032C                                          | IXR1          | YMR055C                 | BUB2          |
| YCR020C-A                                        | MAK31         | YEL053C                 | MAK10         |
| YEL051W                                          | VMA8          | YPR032W                 | SRO7          |
| YLR360W                                          | VPS38         | YEL051W                 | VMA8          |
| YJR140C                                          | HIR3          | YGL019W                 | CKB1          |
| YLR386W                                          | VAC14         | YPR120C                 | CLB5          |
| YHR178W                                          | STB5          | YBR036C                 | CSG2          |
| YGR072W                                          | UPF3          | YCR066W                 | RAD18         |
| YPL195W                                          | APL5          | YAL002W                 | VPS8          |
| YNL106C                                          | INP52         | YDR183W                 | PLP1          |
| YDR225W                                          | HTA1          | YPR120C                 | CLB5          |
| YFR030W                                          | MET10         | YCR086W                 | CSM1          |

| Predictions at threshold level 0.80 continued... |               |                         |               |
|--------------------------------------------------|---------------|-------------------------|---------------|
| Gene1 of predicted pair                          |               | Gene2 of predicted pair |               |
| Systematic Name                                  | Standard Name | Systematic Name         | Standard Name |
| YLR079W                                          | SIC1          | YDL059C                 | RAD59         |
| YLR360W                                          | VPS38         | YJR135C                 | MCM22         |
| YPL105C                                          | YPL105C       | YNL041C                 | COG6          |
| YJL095W                                          | BCK1          | YKL119C                 | VPH2          |
| YKR072C                                          | SIS2          | YML102W                 | CAC2          |
| YDR378C                                          | LSM6          | YOR308C                 | SNU66         |
| YER144C                                          | UBP5          | YNL041C                 | COG6          |
| YDR192C                                          | NUP42         | YMR255W                 | GFD1          |
| YMR216C                                          | SKY1          | YDR310C                 | SUM1          |
| YNL291C                                          | MID1          | YOR368W                 | RAD17         |
| YBR194W                                          | SOY1          | YLR370C                 | ARC18         |
| YPL256C                                          | CLN2          | YKL068W                 | NUP100        |
| YLR386W                                          | VAC14         | YLR410W                 | VIP1          |
| YGL078C                                          | DBP3          | YDL083C                 | RPS16B        |
| YKL116C                                          | PRR1          | YOR066W                 | MSA1          |
| YLR150W                                          | STM1          | YML028W                 | TSA1          |
| YPL161C                                          | BEM4          | YHR081W                 | LRP1          |
| YNL329C                                          | PEX6          | YOL044W                 | PEX15         |
| YOR109W                                          | INP53         | YNL051W                 | COG5          |
| YAL024C                                          | LTE1          | YMR230W                 | RPS10B        |
| YLR288C                                          | MEC3          | YML095C                 | RAD10         |
| YLR018C                                          | POM34         | YIL156W                 | UBP7          |
| YDR507C                                          | GIN4          | YKR048C                 | NAP1          |
| YHR060W                                          | VMA22         | YAR014C                 | BUD14         |
| YOR078W                                          | BUD21         | YHR052W                 | CIC1          |
| YGL087C                                          | MMS2          | YPR046W                 | MCM16         |
| YPL115C                                          | BEM3          | YBR108W                 | YBR108W       |
| YBL016W                                          | FUS3          | YLR452C                 | SST2          |
| YDR318W                                          | MCM21         | YOR308C                 | SNU66         |

| Predictions at threshold level 0.80 continued... |               |                         |               |
|--------------------------------------------------|---------------|-------------------------|---------------|
| Gene1 of predicted pair                          |               | Gene2 of predicted pair |               |
| Systematic Name                                  | Standard Name | Systematic Name         | Standard Name |
| YLR381W                                          | CTF3          | YDL226C                 | GCS1          |
| YGR188C                                          | BUB1          | YOL081W                 | IRA2          |
| YLR452C                                          | SST2          | YHR158C                 | KEL1          |
| YOR127W                                          | RGA1          | YDR202C                 | RAV2          |
| YGL223C                                          | COG1          | YJL004C                 | SYS1          |
| YOR026W                                          | BUB3          | YIL033C                 | BCY1          |
| YGR059W                                          | SPR3          | YKR024C                 | DBP7          |
| YPL161C                                          | BEM4          | YDR144C                 | MKC7          |
| YGL124C                                          | MON1          | YIL133C                 | RPL16A        |
| YER044C                                          | ERG28         | YNL076W                 | MKS1          |
| YNL201C                                          | PSY2          | YBR107C                 | IML3          |
| YDL223C                                          | HBT1          | YLR398C                 | SKI2          |
| YAL024C                                          | LTE1          | YJR060W                 | CBF1          |
| YBR019C                                          | GAL10         | YJL183W                 | MNN11         |
| YLR381W                                          | CTF3          | YPL152W                 | RRD2          |
| YER001W                                          | MNN1          | YJL095W                 | BCK1          |
| YNL206C                                          | RTT106        | YJL136C                 | RPS21B        |
| YLR135W                                          | SLX4          | YNL016W                 | PUB1          |
| YML062C                                          | MFT1          | YBR111W-A               | SUS1          |
| YPL057C                                          | SUR1          | YOL121C                 | RPS19A        |
| YOR076C                                          | SKI7          | YGR072W                 | UPF3          |
| YNL041C                                          | COG6          | YEL042W                 | GDA1          |
| YPL019C                                          | VTC3          | YFL004W                 | VTC2          |
| YNL325C                                          | FIG4          | YLR093C                 | NYV1          |
| YBL058W                                          | SHP1          | YPR036W                 | VMA13         |
| YLR447C                                          | VMA6          | YGL253W                 | HXK2          |
| YNL206C                                          | RTT106        | YER110C                 | KAP123        |
| YKL074C                                          | MUD2          | YNL091W                 | NST1          |
| YNR072W                                          | HXT17         | YKR035W-A               | DID2          |



| Predictions at threshold level 0.80 continued... |               |                         |               |
|--------------------------------------------------|---------------|-------------------------|---------------|
| Gene1 of predicted pair                          |               | Gene2 of predicted pair |               |
| Systematic Name                                  | Standard Name | Systematic Name         | Standard Name |
| YGR249W                                          | MGA1          | YJR032W                 | CPR7          |
| YFL023W                                          | BUD27         | YPL161C                 | BEM4          |
| YOR001W                                          | RRP6          | YNL297C                 | MON2          |
| YGR188C                                          | BUB1          | YOR014W                 | RTS1          |
| YOR290C                                          | SNF2          | YER139C                 | YER139C       |
| YLR192C                                          | HCR1          | YOR035C                 | SHE4          |
| YMR095C                                          | SNO1          | YPL195W                 | APL5          |
| YER044C                                          | ERG28         | YER162C                 | RAD4          |
| YDR484W                                          | VPS52         | YOR035C                 | SHE4          |
| YBR010W                                          | HHT1          | YLR182W                 | SWI6          |
| YBR194W                                          | SOY1          | YER139C                 | YER139C       |
| YMR142C                                          | RPL13B        | YMR153W                 | NUP53         |
| YFR010W                                          | UBP6          | YKL213C                 | DOA1          |
| YCR034W                                          | FEN1          | YOL081W                 | IRA2          |
| YMR202W                                          | ERG2          | YLR370C                 | ARC18         |
| YHL031C                                          | GOS1          | YDR289C                 | RTT103        |
| YDR080W                                          | VPS41         | YGR020C                 | VMA7          |
| YMR039C                                          | SUB1          | YGL148W                 | ARO2          |
| YGR135W                                          | PRE9          | YJR035W                 | RAD26         |
| YOR106W                                          | VAM3          | YNL041C                 | COG6          |
| YLR018C                                          | POM34         | YKL117W                 | SBA1          |
| YIL053W                                          | RHR2          | YJR084W                 | CSN12         |
| YPL115C                                          | BEM3          | YBR290W                 | BSD2          |
| YGR270W                                          | YTA7          | YDR289C                 | RTT103        |
| YLR315W                                          | NKP2          | YDR318W                 | MCM21         |
| YFR031C-A                                        | RPL2A         | YKR035W-A               | DID2          |
| YBR200W                                          | BEM1          | YPL089C                 | RLM1          |
| YJL106W                                          | IME2          | YPR119W                 | CLB2          |
| YMR133W                                          | REC114        | YHR039C-A               | VMA10         |

| Predictions at threshold level 0.80 continued... |               |                         |               |
|--------------------------------------------------|---------------|-------------------------|---------------|
| Gene1 of predicted pair                          |               | Gene2 of predicted pair |               |
| Systematic Name                                  | Standard Name | Systematic Name         | Standard Name |
| YHR195W                                          | NVJ1          | YEL013W                 | VAC8          |
| YMR127C                                          | SAS2          | YLR399C                 | BDF1          |
| YIL008W                                          | URM1          | YGL019W                 | CKB1          |
| YMR205C                                          | PFK2          | YGR135W                 | PRE9          |
| YMR224C                                          | MRE11         | YNL041C                 | COG6          |
| YEL050C                                          | RML2          | YBR107C                 | IML3          |
| YFR031C-A                                        | RPL2A         | YGR072W                 | UPF3          |
| YGL090W                                          | LIF1          | YCR014C                 | POL4          |
| YBR171W                                          | SEC66         | YMR133W                 | REC114        |
| YDR329C                                          | PEX3          | YHR160C                 | PEX18         |
| YDR496C                                          | PUF6          | YKL009W                 | MRT4          |
| YGL087C                                          | MMS2          | YLR386W                 | VAC14         |
| YER162C                                          | RAD4          | YDR153C                 | ENT5          |
| YDR129C                                          | SAC6          | YLR429W                 | CRN1          |
| YAR014C                                          | BUD14         | YOL081W                 | IRA2          |
| YOR112W                                          | CEX1          | YKR030W                 | GMH1          |
| YBR131W                                          | CCZ1          | YPL045W                 | VPS16         |
| YDL002C                                          | NHP10         | YHR039C-A               | VMA10         |
| YLR083C                                          | EMP70         | YML071C                 | COG8          |
| YPL253C                                          | VIK1          | YLR150W                 | STM1          |
| YER116C                                          | SLX8          | YMR152W                 | YIM1          |
| YDR142C                                          | PEX7          | YOL044W                 | PEX15         |
| YDL154W                                          | MSH5          | YLR234W                 | TOP3          |
| YCR020C-A                                        | MAK31         | YLR309C                 | IMH1          |
| YGR249W                                          | MGA1          | YLR180W                 | SAM1          |
| YLR337C                                          | VRP1          | YGL253W                 | HXK2          |
| YNL087W                                          | TCB2          | YJR032W                 | CPR7          |
| YGL200C                                          | EMP24         | YGR135W                 | PRE9          |
| YLR192C                                          | HCR1          | YOL111C                 | MDY2          |

| Predictions at threshold level 0.80 continued... |               |                         |               |
|--------------------------------------------------|---------------|-------------------------|---------------|
| Gene1 of predicted pair                          |               | Gene2 of predicted pair |               |
| Systematic Name                                  | Standard Name | Systematic Name         | Standard Name |
| YMR216C                                          | SKY1          | YOR327C                 | SNC2          |
| YOR127W                                          | RGA1          | YHR152W                 | SPO12         |
| YLR381W                                          | CTF3          | YDR378C                 | LSM6          |
| YDR383C                                          | NKP1          | YMR055C                 | BUB2          |
| YPL024W                                          | RMI1          | YHR134W                 | WSS1          |
| YNL291C                                          | MID1          | YER120W                 | SCS2          |
| YBL102W                                          | SFT2          | YJR060W                 | CBF1          |
| YLR386W                                          | VAC14         | YBR036C                 | CSG2          |
| YPL125W                                          | KAP120        | YKL068W                 | NUP100        |
| YJR005W                                          | APL1          | YGL003C                 | CDH1          |
| YPL120W                                          | VPS30         | YAL002W                 | VPS8          |
| YNL032W                                          | SIW14         | YDR207C                 | UME6          |
| YGL043W                                          | DST1          | YGL094C                 | PAN2          |
| YFL023W                                          | BUD27         | YBR171W                 | SEC66         |
| YGL054C                                          | ERV14         | YNL051W                 | COG5          |
| YOR308C                                          | SNU66         | YER139C                 | YER139C       |
| YEL043W                                          | YEL043W       | YER162C                 | RAD4          |
| YOR191W                                          | RIS1          | YCL037C                 | SRO9          |
| YAL024C                                          | LTE1          | YLR441C                 | RPS1A         |
| YOR080W                                          | DIA2          | YKL160W                 | ELF1          |
| YDL083C                                          | RPS16B        | YPR030W                 | CSR2          |
| YGL223C                                          | COG1          | YDL077C                 | VAM6          |
| YKR099W                                          | BAS1          | YNL238W                 | KEX2          |
| YLR386W                                          | VAC14         | YPL018W                 | CTF19         |
| YKL007W                                          | CAP1          | YDR293C                 | SSD1          |
| YOL018C                                          | TLG2          | YLR309C                 | IMH1          |
| YER040W                                          | GLN3          | YLR180W                 | SAM1          |
| YFL013C                                          | IES1          | YDR378C                 | LSM6          |
| YKR001C                                          | VPS1          | YHR060W                 | VMA22         |

| Predictions at threshold level 0.80 continued... |               |                         |               |
|--------------------------------------------------|---------------|-------------------------|---------------|
| Gene1 of predicted pair                          |               | Gene2 of predicted pair |               |
| Systematic Name                                  | Standard Name | Systematic Name         | Standard Name |
| YBR200W                                          | BEM1          | YGL019W                 | CKB1          |
| YLR234W                                          | TOP3          | YNR052C                 | POP2          |
| YDR137W                                          | RGP1          | YNL076W                 | MKS1          |
| YPR084W                                          | YPR084W       | YHR039C-A               | VMA10         |
| YBR217W                                          | ATG12         | YKL126W                 | YPK1          |
| YKL025C                                          | PAN3          | YLR233C                 | EST1          |
| YML038C                                          | YMD8          | YMR054W                 | STV1          |
| YDR358W                                          | GGA1          | YJL183W                 | MNN11         |
| YPL140C                                          | MKK2          | YIL113W                 | SDP1          |
| YKL110C                                          | KTI12         | YPR046W                 | MCM16         |
| YJL036W                                          | SNX4          | YML071C                 | COG8          |
| YDR108W                                          | GSG1          | YOR069W                 | VPS5          |
| YHR111W                                          | UBA4          | YGL252C                 | RTG2          |
| YCR020C-A                                        | MAK31         | YGL223C                 | COG1          |
| YKL139W                                          | CTK1          | YDR245W                 | MNN10         |
| YLR191W                                          | PEX13         | YNL214W                 | PEX17         |
| YOR076C                                          | SKI7          | YJL176C                 | SWI3          |
| YGR252W                                          | GCN5          | YKR048C                 | NAP1          |
| YPL161C                                          | BEM4          | YGL054C                 | ERV14         |
| YOR270C                                          | VPH1          | YMR133W                 | REC114        |
| YMR273C                                          | ZDS1          | YBR010W                 | HHT1          |
| YCR020C-A                                        | MAK31         | YNL127W                 | FAR11         |
| YAL024C                                          | LTE1          | YDL013W                 | SLX5          |
| YFL013C                                          | IES1          | YGR270W                 | YTA7          |
| YGR261C                                          | APL6          | YEL053C                 | MAK10         |
| YDL116W                                          | NUP84         | YML102W                 | CAC2          |
| YGL208W                                          | SIP2          | YGL179C                 | TOS3          |
| YDL020C                                          | RPN4          | YOR332W                 | VMA4          |
| YGR241C                                          | YAP1802       | YDR320C                 | SWA2          |

| Predictions at threshold level 0.80 continued... |               |                         |               |
|--------------------------------------------------|---------------|-------------------------|---------------|
| Gene1 of predicted pair                          |               | Gene2 of predicted pair |               |
| Systematic Name                                  | Standard Name | Systematic Name         | Standard Name |
| YNL199C                                          | GCR2          | YLR315W                 | NKP2          |
| YDR108W                                          | GSG1          | YHR039C-A               | VMA10         |
| YAL024C                                          | LTE1          | YML103C                 | NUP188        |
| YIL076W                                          | SEC28         | YER120W                 | SCS2          |
| YCR053W                                          | THR4          | YER040W                 | GLN3          |
| YJL176C                                          | SWI3          | YML115C                 | VAN1          |
| YGL078C                                          | DBP3          | YLR093C                 | NYV1          |
| YGL115W                                          | SNF4          | YPL137C                 | GIP3          |
| YLR360W                                          | VPS38         | YML097C                 | VPS9          |
| YPL115C                                          | BEM3          | YER110C                 | KAP123        |
| YGL003C                                          | CDH1          | YJL183W                 | MNN11         |
| YDR443C                                          | SSN2          | YDL083C                 | RPS16B        |
| YJR135C                                          | MCM22         | YDR155C                 | CPR1          |
| YHR178W                                          | STB5          | YPL018W                 | CTF19         |
| YIR017C                                          | MET28         | YDR318W                 | MCM21         |
| YDR156W                                          | RPA14         | YPR120C                 | CLB5          |
| YGR019W                                          | UGA1          | YOR358W                 | HAP5          |
| YPR120C                                          | CLB5          | YLR410W                 | VIP1          |
| YPL042C                                          | SSN3          | YDR335W                 | MSN5          |
| YFL013C                                          | IES1          | YLR182W                 | SWI6          |
| YBR057C                                          | MUM2          | YPL152W                 | RRD2          |
| YIL076W                                          | SEC28         | YCL037C                 | SRO9          |
| YFR031C-A                                        | RPL2A         | YNL291C                 | MID1          |
| YML095C                                          | RAD10         | YCR086W                 | CSM1          |
| YER059W                                          | PCL6          | YNL230C                 | ELA1          |
| YJL095W                                          | BCK1          | YHR114W                 | BZZ1          |
| YMR224C                                          | MRE11         | YBL088C                 | TEL1          |
| YPL152W                                          | RRD2          | YDR183W                 | PLP1          |
| YLR360W                                          | VPS38         | YPL195W                 | APL5          |

| Predictions at threshold level 0.80 continued... |               |                         |               |
|--------------------------------------------------|---------------|-------------------------|---------------|
| Gene1 of predicted pair                          |               | Gene2 of predicted pair |               |
| Systematic Name                                  | Standard Name | Systematic Name         | Standard Name |
| YLR135W                                          | SLX4          | YPL022W                 | RAD1          |
| YKL139W                                          | CTK1          | YER116C                 | SLX8          |
| YOR368W                                          | RAD17         | YNL076W                 | MKS1          |
| YPR084W                                          | YPR084W       | YKL160W                 | ELF1          |
| YMR095C                                          | SNO1          | YOL121C                 | RPS19A        |
| YPL161C                                          | BEM4          | YMR152W                 | YIM1          |
| YKL048C                                          | ELM1          | YDR261C                 | EXG2          |
| YDR254W                                          | CHL4          | YOL091W                 | SPO21         |
| YMR224C                                          | MRE11         | YNL076W                 | MKS1          |
| YBR194W                                          | SOY1          | YML095C                 | RAD10         |
| YMR216C                                          | SKY1          | YER122C                 | GLO3          |
| YOR083W                                          | WHI5          | YLR058C                 | SHM2          |
| YPR072W                                          | NOT5          | YJL140W                 | RPB4          |
| YHR187W                                          | IKI1          | YPL101W                 | ELP4          |
| YMR095C                                          | SNO1          | YKL126W                 | YPK1          |
| YAL024C                                          | LTE1          | YGR188C                 | BUB1          |
| YLR119W                                          | SRN2          | YDR261C                 | EXG2          |
| YNR052C                                          | POP2          | YMR055C                 | BUB2          |
| YDR174W                                          | HMO1          | YLR386W                 | VAC14         |
| YKR072C                                          | SIS2          | YJL124C                 | LSM1          |
| YML103C                                          | NUP188        | YHR111W                 | UBA4          |
| YGL025C                                          | PGD1          | YGR252W                 | GCN5          |
| YJL095W                                          | BCK1          | YER122C                 | GLO3          |
| YLR216C                                          | CPR6          | YFR010W                 | UBP6          |
| YGL163C                                          | RAD54         | YOL081W                 | IRA2          |
| YJL124C                                          | LSM1          | YDR378C                 | LSM6          |
| YPL129W                                          | TAF14         | YGL025C                 | PGD1          |
| YBR173C                                          | UMP1          | YBL025W                 | RRN10         |
| YOR023C                                          | AHC1          | YLR447C                 | VMA6          |

| Predictions at threshold level 0.80 continued... |               |                         |               |
|--------------------------------------------------|---------------|-------------------------|---------------|
| Gene1 of predicted pair                          |               | Gene2 of predicted pair |               |
| Systematic Name                                  | Standard Name | Systematic Name         | Standard Name |
| YML115C                                          | VAN1          | YLR320W                 | MMS22         |
| YER120W                                          | SCS2          | YDR153C                 | ENT5          |
| YGL003C                                          | CDH1          | YDR310C                 | SUM1          |
| YLR399C                                          | BDF1          | YPL248C                 | GAL4          |
| YDL192W                                          | ARF1          | YFL048C                 | EMP47         |
| YDR245W                                          | MNN10         | YNL079C                 | TPM1          |
| YDR335W                                          | MSN5          | YLR032W                 | RAD5          |
| YDR378C                                          | LSM6          | YLR370C                 | ARC18         |
| YKL126W                                          | YPK1          | YJR084W                 | CSN12         |
| YGL033W                                          | HOP2          | YMR230W                 | RPS10B        |
| YHR200W                                          | RPN10         | YJR032W                 | CPR7          |
| YOR195W                                          | SLK19         | YFR036W                 | CDC26         |
| YLR447C                                          | VMA6          | YDL192W                 | ARF1          |
| YPL105C                                          | YPL105C       | YPL234C                 | TFP3          |
| YKL020C                                          | SPT23         | YOR124C                 | UBP2          |
| YDR261C                                          | EXG2          | YER040W                 | GLN3          |
| YDR004W                                          | RAD57         | YER116C                 | SLX8          |
| YJL006C                                          | CTK2          | YKL114C                 | APN1          |
| YGL066W                                          | SGF73         | YOR195W                 | SLK19         |
| YLR234W                                          | TOP3          | YBR082C                 | UBC4          |
| YBR200W                                          | BEM1          | YGL163C                 | RAD54         |
| YAL024C                                          | LTE1          | YNL225C                 | CNM67         |
| YPL024W                                          | RMI1          | YDR156W                 | RPA14         |
| YHR134W                                          | WSS1          | YGR071C                 | YGR071C       |
| YKR020W                                          | VPS51         | YGR105W                 | VMA21         |
| YDR202C                                          | RAV2          | YPR032W                 | SRO7          |
| YIL050W                                          | PCL7          | YGR233C                 | PHO81         |
| YHR013C                                          | ARD1          | YDR076W                 | RAD55         |
| YGR104C                                          | SRB5          | YPL256C                 | CLN2          |

| Predictions at threshold level 0.80 continued... |               |                         |               |
|--------------------------------------------------|---------------|-------------------------|---------------|
| Gene1 of predicted pair                          |               | Gene2 of predicted pair |               |
| Systematic Name                                  | Standard Name | Systematic Name         | Standard Name |
| YBR171W                                          | SEC66         | YDL192W                 | ARF1          |
| YLR120C                                          | YPS1          | YPL161C                 | BEM4          |
| YDL223C                                          | HBT1          | YLR180W                 | SAM1          |
| YJR063W                                          | RPA12         | YJR060W                 | CBF1          |
| YKR099W                                          | BAS1          | YGL003C                 | CDH1          |
| YMR224C                                          | MRE11         | YJR056C                 | YJR056C       |
| YBR111W-A                                        | SUS1          | YPR072W                 | NOT5          |
| YBR019C                                          | GAL10         | YOR327C                 | SNC2          |
| YPL057C                                          | SUR1          | YLR398C                 | SKI2          |
| YOR358W                                          | HAP5          | YLR447C                 | VMA6          |
| YJR032W                                          | CPR7          | YOR035C                 | SHE4          |
| YMR095C                                          | SNO1          | YLR452C                 | SST2          |
| YHR081W                                          | LRP1          | YDR207C                 | UME6          |
| YOL091W                                          | SPO21         | YNL225C                 | CNM67         |
| YDL080C                                          | THI3          | YBR240C                 | THI2          |
| YGL212W                                          | VAM7          | YLR396C                 | VPS33         |
| YOR290C                                          | SNF2          | YLR320W                 | MMS22         |
| YIL103W                                          | DPH1          | YLR254C                 | NDL1          |
| YEL054C                                          | RPL12A        | YGL246C                 | RAI1          |
| YLR360W                                          | VPS38         | YHR205W                 | SCH9          |
| YCR081W                                          | SRB8          | YOR106W                 | VAM3          |
| YKR035W-A                                        | DID2          | YLR320W                 | MMS22         |
| YPL057C                                          | SUR1          | YGR270W                 | YTA7          |
| YLR254C                                          | NDL1          | YOL054W                 | PSH1          |
| YMR152W                                          | YIM1          | YPL195W                 | APL5          |
| YIL076W                                          | SEC28         | YNL199C                 | GCR2          |
| YPR051W                                          | MAK3          | YGR270W                 | YTA7          |
| YBR171W                                          | SEC66         | YHR158C                 | KEL1          |
| YNL325C                                          | FIG4          | YMR311C                 | GLC8          |



| Predictions at threshold level 0.80 continued... |               |                         |               |
|--------------------------------------------------|---------------|-------------------------|---------------|
| Gene1 of predicted pair                          |               | Gene2 of predicted pair |               |
| Systematic Name                                  | Standard Name | Systematic Name         | Standard Name |
| YMR055C                                          | BUB2          | YJR063W                 | RPA12         |
| YML001W                                          | YPT7          | YOL108C                 | INO4          |
| YBL102W                                          | SFT2          | YGR105W                 | VMA21         |
| YIL053W                                          | RHR2          | YOR035C                 | SHE4          |
| YPL079W                                          | RPL21B        | YHR167W                 | THP2          |
| YJR032W                                          | CPR7          | YOL067C                 | RTG1          |
| YCR053W                                          | THR4          | YLR398C                 | SKI2          |
| YGL115W                                          | SNF4          | YDR318W                 | MCM21         |
| YNL242W                                          | ATG2          | YLR431C                 | ATG23         |
| YLR083C                                          | EMP70         | YKR020W                 | VPS51         |
| YOR023C                                          | AHC1          | YIL008W                 | URM1          |
| YMR224C                                          | MRE11         | YDR261C                 | EXG2          |
| YIL005W                                          | EPS1          | YBR170C                 | NPL4          |
| YJL006C                                          | CTK2          | YDR318W                 | MCM21         |
| YER116C                                          | SLX8          | YDR358W                 | GGA1          |
| YHR111W                                          | UBA4          | YOL067C                 | RTG1          |
| YMR095C                                          | SNO1          | YEL060C                 | PRB1          |
| YPR084W                                          | YPR084W       | YNL041C                 | COG6          |
| YBR200W                                          | BEM1          | YGR020C                 | VMA7          |
| YOR106W                                          | VAM3          | YNL051W                 | COG5          |
| YMR199W                                          | CLN1          | YGR252W                 | GCN5          |
| YLR292C                                          | SEC72         | YBL021C                 | HAP3          |
| YOR080W                                          | DIA2          | YLR315W                 | NKP2          |
| YDR254W                                          | CHL4          | YDL185W                 | TFP1          |
| YHR200W                                          | RPN10         | YPL089C                 | RLM1          |
| YNL307C                                          | MCK1          | YDL077C                 | VAM6          |
| YPL057C                                          | SUR1          | YER162C                 | RAD4          |
| YBR171W                                          | SEC66         | YJR084W                 | CSN12         |
| YLR094C                                          | GIS3          | YDL083C                 | RPS16B        |

| Predictions at threshold level 0.80 continued... |               |                         |               |
|--------------------------------------------------|---------------|-------------------------|---------------|
| Gene1 of predicted pair                          |               | Gene2 of predicted pair |               |
| Systematic Name                                  | Standard Name | Systematic Name         | Standard Name |
| YGL135W                                          | RPL1B         | YAL002W                 | VPS8          |
| YML038C                                          | YMD8          | YGR105W                 | VMA21         |
| YGR020C                                          | VMA7          | YBR127C                 | VMA2          |
| YDL020C                                          | RPN4          | YPL022W                 | RAD1          |
| YPL018W                                          | CTF19         | YDR310C                 | SUM1          |
| YBR126C                                          | TPS1          | YBL103C                 | RTG3          |
| YDR484W                                          | VPS52         | YAL030W                 | SNC1          |
| YNL264C                                          | PDR17         | YMR198W                 | CIK1          |
| YDR439W                                          | LRS4          | YLR254C                 | NDL1          |
| YKL110C                                          | KTI12         | YDR318W                 | MCM21         |
| YLR079W                                          | SIC1          | YBR107C                 | IML3          |
| YBR171W                                          | SEC66         | YCR077C                 | PAT1          |
| YDR378C                                          | LSM6          | YNL236W                 | SIN4          |
| YOR033C                                          | EXO1          | YOR032C                 | HMS1          |
| YLR447C                                          | VMA6          | YML071C                 | COG8          |
| YBL021C                                          | HAP3          | YGR270W                 | YTA7          |
| YML012W                                          | ERV25         | YEL036C                 | ANP1          |
| YDR156W                                          | RPA14         | YJR060W                 | CBF1          |
| YPR120C                                          | CLB5          | YDR076W                 | RAD55         |
| YKR061W                                          | KTR2          | YAR014C                 | BUD14         |
| YPR084W                                          | YPR084W       | YCR066W                 | RAD18         |
| YIL034C                                          | CAP2          | YGR270W                 | YTA7          |
| YDR335W                                          | MSN5          | YDR289C                 | RTT103        |
| YGL133W                                          | ITC1          | YHR111W                 | UBA4          |
| YNL032W                                          | SIW14         | YMR230W                 | RPS10B        |
| YOR080W                                          | DIA2          | YDL013W                 | SLX5          |
| YDL116W                                          | NUP84         | YBR107C                 | IML3          |
| YPR167C                                          | MET16         | YOR106W                 | VAM3          |
| YGR241C                                          | YAP1802       | YKR001C                 | VPS1          |

| Predictions at threshold level 0.80 continued... |               |                         |               |
|--------------------------------------------------|---------------|-------------------------|---------------|
| Gene1 of predicted pair                          |               | Gene2 of predicted pair |               |
| Systematic Name                                  | Standard Name | Systematic Name         | Standard Name |
| YMR109W                                          | MYO5          | YHR111W                 | UBA4          |
| YPL115C                                          | BEM3          | YHR178W                 | STB5          |
| YLR386W                                          | VAC14         | YFR030W                 | MET10         |
| YNL307C                                          | MCK1          | YOL054W                 | PSH1          |
| YPL086C                                          | ELP3          | YBL071W-A               | KTI11         |
| YOR368W                                          | RAD17         | YGL148W                 | ARO2          |
| YDL116W                                          | NUP84         | YOL090W                 | MSH2          |
| YLR320W                                          | MMS22         | YLR370C                 | ARC18         |
| YMR216C                                          | SKY1          | YNL107W                 | YAF9          |
| YNL307C                                          | MCK1          | YDR289C                 | RTT103        |
| YBR030W                                          | YBR030W       | YJR032W                 | CPR7          |
| YML115C                                          | VAN1          | YGR133W                 | PEX4          |
| YBR200W                                          | BEM1          | YDR309C                 | GIC2          |
| YFR031C-A                                        | RPL2A         | YKR030W                 | GMH1          |
| YNL264C                                          | PDR17         | YOL051W                 | GAL11         |
| YPL050C                                          | MNN9          | YJL183W                 | MNN11         |
| YHR060W                                          | VMA22         | YLR093C                 | NYV1          |
| YMR224C                                          | MRE11         | YBR073W                 | RDH54         |
| YNL127W                                          | FAR11         | YLR309C                 | IMH1          |
| YMR026C                                          | PEX12         | YJR084W                 | CSN12         |
| YLR381W                                          | CTF3          | YDR318W                 | MCM21         |
| YNL087W                                          | TCB2          | YLR452C                 | SST2          |
| YKL126W                                          | YPK1          | YMR089C                 | YTA12         |
| YJR033C                                          | RAV1          | YAR014C                 | BUD14         |
| YBR290W                                          | BSD2          | YGR188C                 | BUB1          |
| YMR153W                                          | NUP53         | YOR290C                 | SNF2          |
| YEL050C                                          | RML2          | YOR141C                 | ARP8          |
| YGL212W                                          | VAM7          | YML001W                 | YPT7          |
| YBR171W                                          | SEC66         | YLR320W                 | MMS22         |

| Predictions at threshold level 0.80 continued... |               |                         |               |
|--------------------------------------------------|---------------|-------------------------|---------------|
| Gene1 of predicted pair                          |               | Gene2 of predicted pair |               |
| Systematic Name                                  | Standard Name | Systematic Name         | Standard Name |
| YOR127W                                          | RGA1          | YOR358W                 | HAP5          |
| YGL066W                                          | SGF73         | YNL206C                 | RTT106        |
| YBR171W                                          | SEC66         | YMR109W                 | MYO5          |
| YGR104C                                          | SRB5          | YOR290C                 | SNF2          |
| YFR031C-A                                        | RPL2A         | YDR108W                 | GSG1          |
| YMR179W                                          | SPT21         | YPL018W                 | CTF19         |
| YLR079W                                          | SIC1          | YER096W                 | SHC1          |
| YJR024C                                          | MDE1          | YFL047W                 | RGD2          |
| YNL058C                                          | YNL058C       | YLR371W                 | ROM2          |
| YML103C                                          | NUP188        | YJR135C                 | MCM22         |
| YKR046C                                          | PET10         | YKL094W                 | YJU3          |
| YOR195W                                          | SLK19         | YGL003C                 | CDH1          |
| YDR378C                                          | LSM6          | YNL307C                 | MCK1          |
| YER144C                                          | UBP5          | YKR099W                 | BAS1          |
| YPL240C                                          | HSP82         | YGL076C                 | RPL7A         |
| YMR199W                                          | CLN1          | YML102W                 | CAC2          |
| YML016C                                          | PPZ1          | YKL048C                 | ELM1          |
| YDR202C                                          | RAV2          | YJL004C                 | SYS1          |
| YML095C                                          | RAD10         | YHR152W                 | SPO12         |
| YIL076W                                          | SEC28         | YGL212W                 | VAM7          |
| YMR202W                                          | ERG2          | YKR020W                 | VPS51         |
| YMR116C                                          | ASC1          | YBR082C                 | UBC4          |
| YML115C                                          | VAN1          | YGL003C                 | CDH1          |
| YNR052C                                          | POP2          | YCR086W                 | CSM1          |
| YEL027W                                          | CUP5          | YKL041W                 | VPS24         |
| YOL111C                                          | MDY2          | YOR043W                 | WHI2          |
| YLR234W                                          | TOP3          | YJL095W                 | BCK1          |
| YPL057C                                          | SUR1          | YLR350W                 | ORM2          |
| YNL166C                                          | BNI5          | YJL183W                 | MNN11         |

| Predictions at threshold level 0.80 continued... |               |                         |               |
|--------------------------------------------------|---------------|-------------------------|---------------|
| Gene1 of predicted pair                          |               | Gene2 of predicted pair |               |
| Systematic Name                                  | Standard Name | Systematic Name         | Standard Name |
| YLR337C                                          | VRP1          | YCR077C                 | PAT1          |
| YMR198W                                          | CIK1          | YJR032W                 | CPR7          |
| YBR057C                                          | MUM2          | YOR312C                 | RPL20B        |
| YPL042C                                          | SSN3          | YER122C                 | GLO3          |
| YGR261C                                          | APL6          | YKR020W                 | VPS51         |
| YOL051W                                          | GAL11         | YGR252W                 | GCN5          |
| YNL291C                                          | MID1          | YOL018C                 | TLG2          |
| YJL183W                                          | MNN11         | YLR370C                 | ARC18         |
| YBR108W                                          | YBR108W       | YLR320W                 | MMS22         |
| YMR095C                                          | SNO1          | YER044C                 | ERG28         |
| YNL307C                                          | MCK1          | YDR358W                 | GGA1          |
| YNL291C                                          | MID1          | YNL076W                 | MKS1          |
| YHR013C                                          | ARD1          | YLR182W                 | SWI6          |
| YPL024W                                          | RMI1          | YGL078C                 | DBP3          |
| YMR026C                                          | PEX12         | YDR244W                 | PEX5          |
| YPR029C                                          | APL4          | YNR006W                 | VPS27         |
| YHR205W                                          | SCH9          | YDR456W                 | NHX1          |
| YHR052W                                          | CIC1          | YKL068W                 | NUP100        |
| YLR192C                                          | HCR1          | YML115C                 | VAN1          |
| YNR052C                                          | POP2          | YDR183W                 | PLP1          |
| YDR484W                                          | VPS52         | YPL161C                 | BEM4          |
| YMR179W                                          | SPT21         | YPR036W                 | VMA13         |
| YGL200C                                          | EMP24         | YDR358W                 | GGA1          |
| YIL156W                                          | UBP7          | YKR024C                 | DBP7          |
| YJL187C                                          | SWE1          | YLR425W                 | TUS1          |
| YLR119W                                          | SRN2          | YOL121C                 | RPS19A        |
| YKR020W                                          | VPS51         | YJL204C                 | RCY1          |
| YHR034C                                          | PIH1          | YCR060W                 | TAH1          |
| YML095C                                          | RAD10         | YBR215W                 | HPC2          |

| Predictions at threshold level 0.80 continued... |               |                         |               |
|--------------------------------------------------|---------------|-------------------------|---------------|
| Gene1 of predicted pair                          |               | Gene2 of predicted pair |               |
| Systematic Name                                  | Standard Name | Systematic Name         | Standard Name |
| YMR055C                                          | BUB2          | YIL008W                 | URM1          |
| YHR156C                                          | LIN1          | YLR093C                 | NYV1          |
| YGR071C                                          | YGR071C       | YDR469W                 | SDC1          |
| YDR378C                                          | LSM6          | YHL002W                 | HSE1          |
| YOR127W                                          | RGA1          | YDR309C                 | GIC2          |
| YPL018W                                          | CTF19         | YNL107W                 | YAF9          |
| YDR318W                                          | MCM21         | YDR310C                 | SUM1          |
| YPR046W                                          | MCM16         | YCR086W                 | CSM1          |
| YGL212W                                          | VAM7          | YJR060W                 | CBF1          |
| YLR079W                                          | SIC1          | YPL161C                 | BEM4          |
| YLR313C                                          | SPH1          | YPR119W                 | CLB2          |
| YDL125C                                          | HNT1          | YMR039C                 | SUB1          |
| YLR435W                                          | TSR2          | YOR368W                 | RAD17         |
| YFR010W                                          | UBP6          | YMR152W                 | YIM1          |
| YGR261C                                          | APL6          | YLR043C                 | TRX1          |
| YNL215W                                          | IES2          | YDR318W                 | MCM21         |
| YNL094W                                          | APP1          | YPL249C                 | GYP5          |
| YFR031C-A                                        | RPL2A         | YGL078C                 | DBP3          |
| YDR320C                                          | SWA2          | YLR309C                 | IMH1          |
| YNL058C                                          | YNL058C       | YER044C                 | ERG28         |
| YHR200W                                          | RPN10         | YPL195W                 | APL5          |
| YPL022W                                          | RAD1          | YLR313C                 | SPH1          |
| YDR378C                                          | LSM6          | YNL199C                 | GCR2          |
| YOR195W                                          | SLK19         | YGR270W                 | YTA7          |
| YBL008W                                          | HIR1          | YHR039C-A               | VMA10         |
| YHR156C                                          | LIN1          | YHR081W                 | LRP1          |
| YKL160W                                          | ELF1          | YOR124C                 | UBP2          |
| YDR358W                                          | GGA1          | YNL076W                 | MKS1          |
| YDR395W                                          | SXM1          | YDL075W                 | RPL31A        |

| Predictions at threshold level 0.80 continued... |               |                         |               |
|--------------------------------------------------|---------------|-------------------------|---------------|
| Gene1 of predicted pair                          |               | Gene2 of predicted pair |               |
| Systematic Name                                  | Standard Name | Systematic Name         | Standard Name |
| YNL288W                                          | CAF40         | YGL237C                 | HAP2          |
| YKR099W                                          | BAS1          | YER139C                 | YER139C       |
| YGR268C                                          | HUA1          | YOR284W                 | HUA2          |
| YHR156C                                          | LIN1          | YOR043W                 | WHI2          |
| YEL053C                                          | MAK10         | YDR153C                 | ENT5          |
| YGL147C                                          | RPL9A         | YHR039C-A               | VMA10         |
| YBL008W                                          | HIR1          | YJR060W                 | CBF1          |
| YNL087W                                          | TCB2          | YML071C                 | COG8          |
| YLR083C                                          | EMP70         | YNL238W                 | KEX2          |
| YBR283C                                          | SSH1          | YMR022W                 | UBC7          |
| YKL213C                                          | DOA1          | YOR038C                 | HIR2          |
| YBL058W                                          | SHP1          | YKL048C                 | ELM1          |
| YJR090C                                          | GRR1          | YHL002W                 | HSE1          |
| YDR174W                                          | HMO1          | YER116C                 | SLX8          |
| YDL006W                                          | PTC1          | YER122C                 | GLO3          |
| YJR135C                                          | MCM22         | YML028W                 | TSA1          |
| YNL325C                                          | FIG4          | YHR081W                 | LRP1          |
| YMR224C                                          | MRE11         | YJR135C                 | MCM22         |
| YFR010W                                          | UBP6          | YDL184C                 | RPL41A        |
| YBR194W                                          | SOY1          | YJL058C                 | BIT61         |
| YGL115W                                          | SNF4          | YDR358W                 | GGA1          |
| YCR081W                                          | SRB8          | YER049W                 | TPA1          |
| YBR278W                                          | DPB3          | YER161C                 | SPT2          |
| YCL037C                                          | SRO9          | YMR054W                 | STV1          |
| YOR367W                                          | SCP1          | YJL187C                 | SWE1          |
| YBR194W                                          | SOY1          | YGL003C                 | CDH1          |
| YBR127C                                          | VMA2          | YCR088W                 | ABP1          |
| YNL325C                                          | FIG4          | YDL083C                 | RPS16B        |
| YDR080W                                          | VPS41         | YPR051W                 | MAK3          |

| Predictions at threshold level 0.80 continued... |               |                         |               |
|--------------------------------------------------|---------------|-------------------------|---------------|
| Gene1 of predicted pair                          |               | Gene2 of predicted pair |               |
| Systematic Name                                  | Standard Name | Systematic Name         | Standard Name |
| YHR200W                                          | RPN10         | YBL101C                 | ECM21         |
| YJL176C                                          | SWI3          | YMR198W                 | CIK1          |
| YLR447C                                          | VMA6          | YJL183W                 | MNN11         |
| YPR046W                                          | MCM16         | YGL252C                 | RTG2          |
| YNL106C                                          | INP52         | YJL124C                 | LSM1          |
| YBR215W                                          | HPC2          | YML028W                 | TSA1          |
| YPL022W                                          | RAD1          | YGL003C                 | CDH1          |
| YIR017C                                          | MET28         | YJR060W                 | CBF1          |
| YMR153W                                          | NUP53         | YJR084W                 | CSN12         |
| YBR108W                                          | YBR108W       | YPL195W                 | APL5          |
| YGR020C                                          | VMA7          | YJR033C                 | RAV1          |
| YPL120W                                          | VPS30         | YLR309C                 | IMH1          |
| YGR104C                                          | SRB5          | YMR109W                 | MYO5          |
| YLR192C                                          | HCR1          | YFL023W                 | BUD27         |
| YER049W                                          | TPA1          | YEL036C                 | ANP1          |
| YPR018W                                          | RLF2          | YJL095W                 | BCK1          |
| YDL065C                                          | PEX19         | YMR204C                 | INP1          |
| YOR035C                                          | SHE4          | YLR425W                 | TUS1          |
| YER116C                                          | SLX8          | YNL307C                 | MCK1          |
| YJL190C                                          | RPS22A        | YLR233C                 | EST1          |
| YGL033W                                          | HOP2          | YLR370C                 | ARC18         |
| YDR293C                                          | SSD1          | YCR086W                 | CSM1          |
| YOR290C                                          | SNF2          | YNL307C                 | MCK1          |
| YPR052C                                          | NHP6A         | YPL042C                 | SSN3          |
| YDR289C                                          | RTT103        | YLR233C                 | EST1          |
| YOR358W                                          | HAP5          | YMR125W                 | STO1          |
| YNL297C                                          | MON2          | YMR055C                 | BUB2          |
| YPR052C                                          | NHP6A         | YBL008W                 | HIR1          |
| YLR192C                                          | HCR1          | YPL037C                 | EGD1          |



| Predictions at threshold level 0.80 continued... |               |                         |               |
|--------------------------------------------------|---------------|-------------------------|---------------|
| Gene1 of predicted pair                          |               | Gene2 of predicted pair |               |
| Systematic Name                                  | Standard Name | Systematic Name         | Standard Name |
| YHR178W                                          | STB5          | YOR023C                 | AHC1          |
| YOR109W                                          | INP53         | YCL001W                 | RER1          |
| YKR084C                                          | HBS1          | YNL001W                 | DOM34         |
| YBL003C                                          | HTA2          | YBL002W                 | HTB2          |
| YFL023W                                          | BUD27         | YMR152W                 | YIM1          |
| YPR084W                                          | YPR084W       | YDR440W                 | DOT1          |
| YBL047C                                          | EDE1          | YOR035C                 | SHE4          |
| YLR337C                                          | VRP1          | YBR181C                 | RPS6B         |
| YLR234W                                          | TOP3          | YKL048C                 | ELM1          |
| YDL116W                                          | NUP84         | YGR188C                 | BUB1          |
| YDL056W                                          | MBP1          | YDR335W                 | MSN5          |
| YKL110C                                          | KTI12         | YPL152W                 | RRD2          |
| YNL243W                                          | SLA2          | YOR367W                 | SCP1          |
| YGL223C                                          | COG1          | YLR093C                 | NYV1          |
| YBR108W                                          | YBR108W       | YDR144C                 | MKC7          |
| YPL022W                                          | RAD1          | YDR171W                 | HSP42         |
| YEL065W                                          | SIT1          | YAL024C                 | LTE1          |
| YOR109W                                          | INP53         | YJR060W                 | CBF1          |
| YMR055C                                          | BUB2          | YGL124C                 | MON1          |
| YPL115C                                          | BEM3          | YBR114W                 | RAD16         |
| YOR043W                                          | WHI2          | YBR036C                 | CSG2          |
| YOR069W                                          | VPS5          | YPR032W                 | SRO7          |
| YLR410W                                          | VIP1          | YLR182W                 | SWI6          |
| YDR004W                                          | RAD57         | YOR195W                 | SLK19         |
| YGL078C                                          | DBP3          | YKR099W                 | BAS1          |
| YER116C                                          | SLX8          | YJR056C                 | YJR056C       |
| YOL086C                                          | ADH1          | YOL151W                 | GRE2          |
| YGL003C                                          | CDH1          | YBL025W                 | RRN10         |
| YHL031C                                          | GOS1          | YGL174W                 | BUD13         |

| Predictions at threshold level 0.80 continued... |               |                         |               |
|--------------------------------------------------|---------------|-------------------------|---------------|
| Gene1 of predicted pair                          |               | Gene2 of predicted pair |               |
| Systematic Name                                  | Standard Name | Systematic Name         | Standard Name |
| YGL003C                                          | CDH1          | YDR207C                 | UME6          |
| YNL288W                                          | CAF40         | YNL107W                 | YAF9          |
| YLR094C                                          | GIS3          | YDR310C                 | SUM1          |
| YMR224C                                          | MRE11         | YJR060W                 | CBF1          |
| YMR127C                                          | SAS2          | YEL053C                 | MAK10         |
| YDR456W                                          | NHX1          | YPL256C                 | CLN2          |
| YPL161C                                          | BEM4          | YPR120C                 | CLB5          |
| YEL051W                                          | VMA8          | YAR014C                 | BUD14         |
| YJR033C                                          | RAV1          | YKL119C                 | VPH2          |
| YOR132W                                          | VPS17         | YJL004C                 | SYS1          |
| YMR038C                                          | CCS1          | YBR082C                 | UBC4          |
| YGL212W                                          | VAM7          | YPR173C                 | VPS4          |
| YHR161C                                          | YAP1801       | YCR088W                 | ABP1          |
| YPL256C                                          | CLN2          | YMR038C                 | CCS1          |
| YGL066W                                          | SGF73         | YFR010W                 | UBP6          |
| YNL025C                                          | SSN8          | YGL025C                 | PGD1          |
| YER162C                                          | RAD4          | YDR310C                 | SUM1          |
| YNL032W                                          | SIW14         | YOL081W                 | IRA2          |
| YLR192C                                          | HCR1          | YDR477W                 | SNF1          |
| YJL154C                                          | VPS35         | YGR054W                 | YGR054W       |
| YLR079W                                          | SIC1          | YNL248C                 | RPA49         |
| YHR081W                                          | LRP1          | YLR093C                 | NYV1          |
| YOR023C                                          | AHC1          | YJL183W                 | MNN11         |
| YNL248C                                          | RPA49         | YOR141C                 | ARP8          |
| YMR142C                                          | RPL13B        | YMR133W                 | REC114        |
| YOL043C                                          | NTG2          | YKL114C                 | APN1          |
| YDR144C                                          | MKC7          | YAL002W                 | VPS8          |
| YPR017C                                          | DSS4          | YOR109W                 | INP53         |
| YJL136C                                          | RPS21B        | YHR111W                 | UBA4          |

| Predictions at threshold level 0.80 continued... |               |                         |               |
|--------------------------------------------------|---------------|-------------------------|---------------|
| Gene1 of predicted pair                          |               | Gene2 of predicted pair |               |
| Systematic Name                                  | Standard Name | Systematic Name         | Standard Name |
| YPR051W                                          | MAK3          | YDR207C                 | UME6          |
| YKR099W                                          | BAS1          | YJR084W                 | CSN12         |
| YGL033W                                          | HOP2          | YOR035C                 | SHE4          |
| YNL058C                                          | YNL058C       | YGL115W                 | SNF4          |
| YMR095C                                          | SNO1          | YDR261C                 | EXG2          |
| YGL087C                                          | MMS2          | YHR200W                 | RPN10         |
| YOR127W                                          | RGA1          | YDL077C                 | VAM6          |
| YPL253C                                          | VIK1          | YDL047W                 | SIT4          |
| YIL076W                                          | SEC28         | YJR084W                 | CSN12         |
| YGL133W                                          | ITC1          | YNL116W                 | DMA2          |
| YDR363W-A                                        | SEM1          | YKR030W                 | GMH1          |
| YBR127C                                          | VMA2          | YKR001C                 | VPS1          |
| YDR245W                                          | MNN10         | YBR171W                 | SEC66         |
| YIL076W                                          | SEC28         | YOL081W                 | IRA2          |
| YIL076W                                          | SEC28         | YLR350W                 | ORM2          |
| YKL139W                                          | CTK1          | YDL184C                 | RPL41A        |
| YNL325C                                          | FIG4          | YPL161C                 | BEM4          |
| YKL007W                                          | CAP1          | YMR055C                 | BUB2          |
| YPR131C                                          | NAT3          | YMR038C                 | CCS1          |
| YDR245W                                          | MNN10         | YDR440W                 | DOT1          |
| YOR039W                                          | CKB2          | YLR350W                 | ORM2          |
| YBR094W                                          | PBY1          | YGL100W                 | SEH1          |
| YGL060W                                          | YBP2          | YBR200W                 | BEM1          |
| YML016C                                          | PPZ1          | YOR043W                 | WHI2          |
| YMR016C                                          | SOK2          | YOR043W                 | WHI2          |
| YLR381W                                          | CTF3          | YJR032W                 | CPR7          |
| YIL036W                                          | CST6          | YHR013C                 | ARD1          |
| YLR360W                                          | VPS38         | YJL095W                 | BCK1          |
| YKR072C                                          | SIS2          | YDR310C                 | SUM1          |

| Predictions at threshold level 0.80 continued... |               |                         |               |
|--------------------------------------------------|---------------|-------------------------|---------------|
| Gene1 of predicted pair                          |               | Gene2 of predicted pair |               |
| Systematic Name                                  | Standard Name | Systematic Name         | Standard Name |
| YNL215W                                          | IES2          | YML016C                 | PPZ1          |
| YJR091C                                          | JSN1          | YLR370C                 | ARC18         |
| YDR156W                                          | RPA14         | YDL006W                 | PTC1          |
| YNL291C                                          | MID1          | YPL234C                 | TFP3          |
| YPL001W                                          | HAT1          | YHR039C-A               | VMA10         |
| YML001W                                          | YPT7          | YDR310C                 | SUM1          |
| YLR095C                                          | IOC2          | YGL212W                 | VAM7          |
| YEL065W                                          | SIT1          | YNL041C                 | COG6          |
| YDL083C                                          | RPS16B        | YDR358W                 | GGA1          |
| YNL218W                                          | MGS1          | YGL175C                 | SAE2          |
| YDL161W                                          | ENT1          | YPL045W                 | VPS16         |
| YDR192C                                          | NUP42         | YPR119W                 | CLB2          |
| YKR059W                                          | TIF1          | YLR320W                 | MMS22         |
| YML103C                                          | NUP188        | YNL116W                 | DMA2          |
| YDL155W                                          | CLB3          | YEL056W                 | HAT2          |
| YLR396C                                          | VPS33         | YGL124C                 | MON1          |
| YNL106C                                          | INP52         | YJR135C                 | MCM22         |
| YOR069W                                          | VPS5          | YGL212W                 | VAM7          |
| YBR173C                                          | UMP1          | YNL032W                 | SIW14         |
| YPL106C                                          | SSE1          | YPL018W                 | CTF19         |
| YDR254W                                          | CHL4          | YAR014C                 | BUD14         |
| YOR191W                                          | RIS1          | YLR135W                 | SLX4          |
| YBR173C                                          | UMP1          | YDR310C                 | SUM1          |
| YJR032W                                          | CPR7          | YDL192W                 | ARF1          |
| YPL253C                                          | VIK1          | YML095C                 | RAD10         |
| YIL140W                                          | AXL2          | YGL054C                 | ERV14         |
| YNL307C                                          | MCK1          | YMR214W                 | SCJ1          |
| YMR153W                                          | NUP53         | YKR035W-A               | DID2          |
| YNL291C                                          | MID1          | YDR207C                 | UME6          |

| Predictions at threshold level 0.80 continued... |               |                         |               |
|--------------------------------------------------|---------------|-------------------------|---------------|
| Gene1 of predicted pair                          |               | Gene2 of predicted pair |               |
| Systematic Name                                  | Standard Name | Systematic Name         | Standard Name |
| YOR008C                                          | SLG1          | YOR014W                 | RTS1          |
| YKL048C                                          | ELM1          | YBL087C                 | RPL23A        |
| YNL041C                                          | COG6          | YFR036W                 | CDC26         |
| YDR071C                                          | PAA1          | YLR357W                 | RSC2          |
| YPL057C                                          | SUR1          | YCR053W                 | THR4          |
| YDL226C                                          | GCS1          | YJR035W                 | RAD26         |
| YHR161C                                          | YAP1801       | YBR127C                 | VMA2          |
| YGL124C                                          | MON1          | YGL252C                 | RTG2          |
| YNL079C                                          | TPM1          | YFR036W                 | CDC26         |
| YDR448W                                          | ADA2          | YBR009C                 | HHF1          |
| YNL031C                                          | HHT2          | YBR010W                 | HHT1          |
| YFL023W                                          | BUD27         | YLR320W                 | MMS22         |
| YJL029C                                          | VPS53         | YOR035C                 | SHE4          |
| YBL106C                                          | SRO77         | YLR423C                 | ATG17         |
| YLR381W                                          | CTF3          | YKL110C                 | KTI12         |
| YGL153W                                          | PEX14         | YGR077C                 | PEX8          |
| YLR216C                                          | CPR6          | YPL018W                 | CTF19         |
| YNL215W                                          | IES2          | YDR137W                 | RGP1          |
| YDL083C                                          | RPS16B        | YOR035C                 | SHE4          |
| YNR072W                                          | HXT17         | YBR280C                 | SAF1          |
| YGL025C                                          | PGD1          | YNL238W                 | KEX2          |
| YNL025C                                          | SSN8          | YMR038C                 | CCS1          |
| YKL139W                                          | CTK1          | YBR217W                 | ATG12         |
| YDR225W                                          | HTA1          | YDR335W                 | MSN5          |
| YHL019C                                          | APM2          | YKL135C                 | APL2          |
| YGL174W                                          | BUD13         | YOR038C                 | HIR2          |
| YIL002C                                          | INP51         | YBL047C                 | EDE1          |
| YGL253W                                          | HXK2          | YOL067C                 | RTG1          |
| YOR195W                                          | SLK19         | YHR111W                 | UBA4          |

| Predictions at threshold level 0.80 continued... |               |                         |               |
|--------------------------------------------------|---------------|-------------------------|---------------|
| Gene1 of predicted pair                          |               | Gene2 of predicted pair |               |
| Systematic Name                                  | Standard Name | Systematic Name         | Standard Name |
| YGL087C                                          | MMS2          | YGR108W                 | CLB1          |
| YDL184C                                          | RPL41A        | YDR207C                 | UME6          |
| YPL057C                                          | SUR1          | YPR030W                 | CSR2          |
| YKL068W                                          | NUP100        | YKR024C                 | DBP7          |
| YER122C                                          | GLO3          | YDR207C                 | UME6          |
| YLR441C                                          | RPS1A         | YGL124C                 | MON1          |
| YKL126W                                          | YPK1          | YLR441C                 | RPS1A         |
| YDR254W                                          | CHL4          | YKL101W                 | HSL1          |
| YGL151W                                          | NUT1          | YGR188C                 | BUB1          |
| YJR056C                                          | YJR056C       | YMR311C                 | GLC8          |
| YDR439W                                          | LRS4          | YOR141C                 | ARP8          |
| YER110C                                          | KAP123        | YBL079W                 | NUP170        |
| YER116C                                          | SLX8          | YDL223C                 | HBT1          |
| YIL036W                                          | CST6          | YKL041W                 | VPS24         |
| YJL154C                                          | VPS35         | YJL095W                 | BCK1          |
| YMR055C                                          | BUB2          | YOL054W                 | PSH1          |
| YOR066W                                          | MSA1          | YER040W                 | GLN3          |
| YER129W                                          | SAK1          | YGL190C                 | CDC55         |
| YOR275C                                          | RIM20         | YOR043W                 | WHI2          |
| YBR200W                                          | BEM1          | YMR133W                 | REC114        |
| YNL199C                                          | GCR2          | YFL047W                 | RGD2          |
| YDR335W                                          | MSN5          | YKL110C                 | KTI12         |
| YBR107C                                          | IML3          | YDL047W                 | SIT4          |
| YJL053W                                          | PEP8          | YHR012W                 | VPS29         |
| YBR171W                                          | SEC66         | YBR036C                 | CSG2          |
| YEL050C                                          | RML2          | YJL127C                 | SPT10         |
| YBR057C                                          | MUM2          | YKL101W                 | HSL1          |
| YDR293C                                          | SSD1          | YBR200W                 | BEM1          |
| YHL002W                                          | HSE1          | YGR188C                 | BUB1          |

| Predictions at threshold level 0.80 continued... |               |                         |               |
|--------------------------------------------------|---------------|-------------------------|---------------|
| Gene1 of predicted pair                          |               | Gene2 of predicted pair |               |
| Systematic Name                                  | Standard Name | Systematic Name         | Standard Name |
| YEL053C                                          | MAK10         | YPL137C                 | GIP3          |
| YER162C                                          | RAD4          | YJR033C                 | RAV1          |
| YLR234W                                          | TOP3          | YHR012W                 | VPS29         |
| YDR293C                                          | SSD1          | YNR032W                 | PPG1          |
| YJR083C                                          | ACF4          | YDR507C                 | GIN4          |
| YCR020C-A                                        | MAK31         | YPL234C                 | TFP3          |
| YGR019W                                          | UGA1          | YCR086W                 | CSM1          |
| YER162C                                          | RAD4          | YDL192W                 | ARF1          |
| YDR001C                                          | NTH1          | YPR119W                 | CLB2          |
| YLR360W                                          | VPS38         | YML038C                 | YMD8          |
| YMR223W                                          | UBP8          | YBR111W-A               | SUS1          |
| YHR178W                                          | STB5          | YPR051W                 | MAK3          |
| YDL223C                                          | HBT1          | YPR046W                 | MCM16         |
| YMR016C                                          | SOK2          | YGL212W                 | VAM7          |
| YOR043W                                          | WHI2          | YOR066W                 | MSA1          |
| YPR018W                                          | RLF2          | YGL175C                 | SAE2          |
| YPL024W                                          | RMI1          | YDL083C                 | RPS16B        |
| YML103C                                          | NUP188        | YGL016W                 | KAP122        |
| YKR020W                                          | VPS51         | YHL002W                 | HSE1          |
| YNL325C                                          | FIG4          | YER116C                 | SLX8          |
| YML115C                                          | VAN1          | YML071C                 | COG8          |
| YBR114W                                          | RAD16         | YLR233C                 | EST1          |
| YNL027W                                          | CRZ1          | YJL164C                 | TPK1          |
| YBR171W                                          | SEC66         | YMR230W                 | RPS10B        |
| YJR005W                                          | APL1          | YLR370C                 | ARC18         |
| YBL025W                                          | RRN10         | YER040W                 | GLN3          |
| YOR043W                                          | WHI2          | YPR046W                 | MCM16         |
| YLR090W                                          | XDJ1          | YBL058W                 | SHP1          |
| YER116C                                          | SLX8          | YBL025W                 | RRN10         |

| Predictions at threshold level 0.80 continued... |               |                         |               |
|--------------------------------------------------|---------------|-------------------------|---------------|
| Gene1 of predicted pair                          |               | Gene2 of predicted pair |               |
| Systematic Name                                  | Standard Name | Systematic Name         | Standard Name |
| YDL006W                                          | PTC1          | YHL011C                 | PRS3          |
| YJL176C                                          | SWI3          | YOR080W                 | DIA2          |
| YJL036W                                          | SNX4          | YKR020W                 | VPS51         |
| YMR054W                                          | STV1          | YNL127W                 | FAR11         |
| YMR199W                                          | CLN1          | YDR207C                 | UME6          |
| YOL121C                                          | RPS19A        | YMR230W                 | RPS10B        |
| YHR205W                                          | SCH9          | YLR425W                 | TUS1          |
| YLR180W                                          | SAM1          | YMR230W                 | RPS10B        |
| YOR083W                                          | WHI5          | YCR065W                 | HCM1          |
| YAL024C                                          | LTE1          | YJL172W                 | CPS1          |
| YIL076W                                          | SEC28         | YMR230W                 | RPS10B        |
| YDL006W                                          | PTC1          | YLR371W                 | ROM2          |
| YKL048C                                          | ELM1          | YPL089C                 | RLM1          |
| YMR039C                                          | SUB1          | YLR381W                 | CTF3          |
| YGL060W                                          | YBP2          | YPR046W                 | MCM16         |
| YBR200W                                          | BEM1          | YMR202W                 | ERG2          |
| YDL020C                                          | RPN4          | YMR109W                 | MYO5          |
| YLL039C                                          | UBI4          | YDR129C                 | SAC6          |
| YBR057C                                          | MUM2          | YPL018W                 | CTF19         |
| YCL001W                                          | RER1          | YGR105W                 | VMA21         |
| YHR073W                                          | OSH3          | YPL246C                 | RBD2          |
| YHR178W                                          | STB5          | YBR114W                 | RAD16         |
| YKL025C                                          | PAN3          | YKL048C                 | ELM1          |
| YCR066W                                          | RAD18         | YOL018C                 | TLG2          |
| YGR270W                                          | YTA7          | YHL002W                 | HSE1          |
| YHR178W                                          | STB5          | YLR320W                 | MMS22         |
| YBR200W                                          | BEM1          | YLR233C                 | EST1          |
| YDL002C                                          | NHP10         | YDR289C                 | RTT103        |
| YDR254W                                          | CHL4          | YGR054W                 | YGR054W       |



| Predictions at threshold level 0.80 continued... |               |                         |               |
|--------------------------------------------------|---------------|-------------------------|---------------|
| Gene1 of predicted pair                          |               | Gene2 of predicted pair |               |
| Systematic Name                                  | Standard Name | Systematic Name         | Standard Name |
| YLR320W                                          | MMS22         | YER122C                 | GLO3          |
| YGL025C                                          | PGD1          | YJL140W                 | RPB4          |
| YFR009W                                          | GCN20         | YJL189W                 | RPL39         |
| YCL001W                                          | RER1          | YHL020C                 | OPI1          |
| YNR072W                                          | HXT17         | YHR200W                 | RPN10         |
| YIL034C                                          | CAP2          | YER110C                 | KAP123        |
| YOR033C                                          | EXO1          | YPL256C                 | CLN2          |
| YLR083C                                          | EMP70         | YNL297C                 | MON2          |
| YNL068C                                          | FKH2          | YDR507C                 | GIN4          |
| YNL079C                                          | TPM1          | YEL036C                 | ANP1          |
| YOR195W                                          | SLK19         | YOR368W                 | RAD17         |
| YNL201C                                          | PSY2          | YPL152W                 | RRD2          |
| YFR030W                                          | MET10         | YGR188C                 | BUB1          |
| YLR452C                                          | SST2          | YER040W                 | GLN3          |
| YCR020C-A                                        | MAK31         | YER162C                 | RAD4          |
| YBR215W                                          | HPC2          | YOR038C                 | HIR2          |
| YEL053C                                          | MAK10         | YPL018W                 | CTF19         |
| YLR422W                                          | YLR422W       | YNR064C                 | YNR064C       |
| YKR072C                                          | SIS2          | YDL002C                 | NHP10         |
| YAL016W                                          | TPD3          | YPR040W                 | TIP41         |
| YHR134W                                          | WSS1          | YJR035W                 | RAD26         |
| YGR081C                                          | SLX9          | YOR001W                 | RRP6          |
| YGL250W                                          | RMR1          | YOL081W                 | IRA2          |
| YBR194W                                          | SOY1          | YER118C                 | SHO1          |
| YJL172W                                          | CPS1          | YKL126W                 | YPK1          |
| YJL058C                                          | BIT61         | YPL106C                 | SSE1          |
| YPL096C-A                                        | ERI1          | YEL044W                 | IES6          |
| YPL037C                                          | EGD1          | YOL121C                 | RPS19A        |
| YGR261C                                          | APL6          | YHR012W                 | VPS29         |

| Predictions at threshold level 0.80 continued... |               |                         |               |
|--------------------------------------------------|---------------|-------------------------|---------------|
| Gene1 of predicted pair                          |               | Gene2 of predicted pair |               |
| Systematic Name                                  | Standard Name | Systematic Name         | Standard Name |
| YLR452C                                          | SST2          | YDR318W                 | MCM21         |
| YML115C                                          | VAN1          | YML016C                 | PPZ1          |
| YHR178W                                          | STB5          | YML016C                 | PPZ1          |
| YER144C                                          | UBP5          | YKL048C                 | ELM1          |
| YAL010C                                          | MDM10         | YIL103W                 | DPH1          |
| YHR152W                                          | SPO12         | YOR275C                 | RIM20         |
| YBR031W                                          | RPL4A         | YHR203C                 | RPS4B         |
| YMR054W                                          | STV1          | YKR030W                 | GMH1          |
| YLR234W                                          | TOP3          | YOL043C                 | NTG2          |
| YNL243W                                          | SLA2          | YJR125C                 | ENT3          |
| YBR108W                                          | YBR108W       | YMR311C                 | GLC8          |
| YNR072W                                          | HXT17         | YLR370C                 | ARC18         |
| YCL037C                                          | SRO9          | YAL002W                 | VPS8          |
| YPL018W                                          | CTF19         | YGL003C                 | CDH1          |
| YDR174W                                          | HMO1          | YPL022W                 | RAD1          |
| YHR134W                                          | WSS1          | YNL248C                 | RPA49         |
| YDL002C                                          | NHP10         | YCL037C                 | SRO9          |
| YBR200W                                          | BEM1          | YDR484W                 | VPS52         |
| YOL121C                                          | RPS19A        | YER122C                 | GLO3          |
| YMR224C                                          | MRE11         | YKL139W                 | CTK1          |
| YKL007W                                          | CAP1          | YDL226C                 | GCS1          |
| YDR129C                                          | SAC6          | YBR127C                 | VMA2          |
| YPR018W                                          | RLF2          | YPL022W                 | RAD1          |
| YOL044W                                          | PEX15         | YJL095W                 | BCK1          |
| YNL094W                                          | APP1          | YHR114W                 | BZZ1          |
| YGL060W                                          | YBP2          | YJR060W                 | CBF1          |
| YPL129W                                          | TAF14         | YLR182W                 | SWI6          |
| YDR129C                                          | SAC6          | YKR001C                 | VPS1          |
| YIR005W                                          | IST3          | YCR086W                 | CSM1          |

| Predictions at threshold level 0.80 continued... |               |                         |               |
|--------------------------------------------------|---------------|-------------------------|---------------|
| Gene1 of predicted pair                          |               | Gene2 of predicted pair |               |
| Systematic Name                                  | Standard Name | Systematic Name         | Standard Name |
| YBR260C                                          | RGD1          | YDR207C                 | UME6          |
| YDR225W                                          | HTA1          | YGL241W                 | KAP114        |
| YBL051C                                          | PIN4          | YDR155C                 | CPR1          |
| YDR142C                                          | PEX7          | YDR265W                 | PEX10         |
| YGL212W                                          | VAM7          | YOL111C                 | MDY2          |
| YKL116C                                          | PRR1          | YDL083C                 | RPS16B        |
| YKL025C                                          | PAN3          | YGR188C                 | BUB1          |
| YGR081C                                          | SLX9          | YML095C                 | RAD10         |
| YBR108W                                          | YBR108W       | YBR036C                 | CSG2          |
| YJL127C                                          | SPT10         | YJR135C                 | MCM22         |
| YEL065W                                          | SIT1          | YMR038C                 | CCS1          |
| YNL106C                                          | INP52         | YCR086W                 | CSM1          |
| YHR016C                                          | YSC84         | YOR284W                 | HUA2          |
| YLR170C                                          | APS1          | YKR001C                 | VPS1          |
| YAL024C                                          | LTE1          | YDR254W                 | CHL4          |
| YMR224C                                          | MRE11         | YOR080W                 | DIA2          |
| YOR141C                                          | ARP8          | YOL054W                 | PSH1          |
| YDR244W                                          | PEX5          | YGL153W                 | PEX14         |
| YML001W                                          | YPT7          | YLR370C                 | ARC18         |
| YKL126W                                          | YPK1          | YKR099W                 | BAS1          |
| YGL147C                                          | RPL9A         | YHR156C                 | LIN1          |
| YBL021C                                          | HAP3          | YBR171W                 | SEC66         |
| YML095C                                          | RAD10         | YPL106C                 | SSE1          |
| YPL024W                                          | RMI1          | YFR010W                 | UBP6          |
| YER096W                                          | SHC1          | YHR012W                 | VPS29         |
| YJL154C                                          | VPS35         | YDR310C                 | SUM1          |
| YLR181C                                          | VTA1          | YDR486C                 | VPS60         |
| YMR004W                                          | MVP1          | YPL195W                 | APL5          |
| YNL166C                                          | BNI5          | YGL151W                 | NUT1          |

| Predictions at threshold level 0.80 continued... |               |                         |               |
|--------------------------------------------------|---------------|-------------------------|---------------|
| Gene1 of predicted pair                          |               | Gene2 of predicted pair |               |
| Systematic Name                                  | Standard Name | Systematic Name         | Standard Name |
| YNL032W                                          | SIW14         | YHR060W                 | VMA22         |
| YKL139W                                          | CTK1          | YHR081W                 | LRP1          |
| YDR156W                                          | RPA14         | YHR115C                 | DMA1          |
| YOR112W                                          | CEX1          | YGR105W                 | VMA21         |
| YDL116W                                          | NUP84         | YOR033C                 | EXO1          |
| YPL057C                                          | SUR1          | YPL137C                 | GIP3          |
| YHR030C                                          | SLT2          | YER099C                 | PRS2          |
| YIL076W                                          | SEC28         | YNL238W                 | KEX2          |
| YDR265W                                          | PEX10         | YDL065C                 | PEX19         |
| YJL183W                                          | MNN11         | YBL101C                 | ECM21         |
| YBR195C                                          | MSI1          | YEL056W                 | HAT2          |
| YBR200W                                          | BEM1          | YOR106W                 | VAM3          |
| YDL101C                                          | DUN1          | YDL013W                 | SLX5          |
| YJL006C                                          | CTK2          | YLR254C                 | NDL1          |
| YER144C                                          | UBP5          | YDR358W                 | GGA1          |
| YBR127C                                          | VMA2          | YOR036W                 | PEP12         |
| YHR171W                                          | ATG7          | YHR161C                 | YAP1801       |
| YBR194W                                          | SOY1          | YNL199C                 | GCR2          |
| YPL129W                                          | TAF14         | YNL059C                 | ARP5          |
| YFL013C                                          | IES1          | YKL213C                 | DOA1          |
| YLR148W                                          | PEP3          | YPL045W                 | VPS16         |
| YDR202C                                          | RAV2          | YML038C                 | YMD8          |
| YJL127C                                          | SPT10         | YGL003C                 | CDH1          |
| YLR093C                                          | NYV1          | YER122C                 | GLO3          |
| YNL032W                                          | SIW14         | YBR036C                 | CSG2          |
| YCR065W                                          | HCM1          | YLR079W                 | SIC1          |
| YMR039C                                          | SUB1          | YPL018W                 | CTF19         |
| YAL051W                                          | OAF1          | YPL001W                 | HAT1          |
| YCR020C-A                                        | MAK31         | YHL031C                 | GOS1          |

| Predictions at threshold level 0.80 continued... |               |                         |               |
|--------------------------------------------------|---------------|-------------------------|---------------|
| Gene1 of predicted pair                          |               | Gene2 of predicted pair |               |
| Systematic Name                                  | Standard Name | Systematic Name         | Standard Name |
| YLR386W                                          | VAC14         | YPL195W                 | APL5          |
| YHR114W                                          | BZZ1          | YNL107W                 | YAF9          |
| YLR148W                                          | PEP3          | YGL124C                 | MON1          |
| YLR083C                                          | EMP70         | YPR017C                 | DSS4          |
| YOR332W                                          | VMA4          | YHR060W                 | VMA22         |
| YDL184C                                          | RPL41A        | YER122C                 | GLO3          |
| YLR292C                                          | SEC72         | YCL001W                 | RER1          |
| YML115C                                          | VAN1          | YGL215W                 | CLG1          |
| YML016C                                          | PPZ1          | YBL047C                 | EDE1          |
| YDR265W                                          | PEX10         | YGR077C                 | PEX8          |
| YGR040W                                          | KSS1          | YBR083W                 | TEC1          |
| YOR066W                                          | MSA1          | YLR398C                 | SKI2          |
| YLR441C                                          | RPS1A         | YNL058C                 | YNL058C       |
| YPR018W                                          | RLF2          | YOR014W                 | RTS1          |
| YML001W                                          | YPT7          | YPL120W                 | VPS30         |
| YCL037C                                          | SRO9          | YNL238W                 | KEX2          |
| YPL024W                                          | RMI1          | YBR171W                 | SEC66         |
| YDR318W                                          | MCM21         | YGR188C                 | BUB1          |
| YOR132W                                          | VPS17         | YJL095W                 | BCK1          |
| YBR171W                                          | SEC66         | YLR182W                 | SWI6          |
| YGL223C                                          | COG1          | YLR309C                 | IMH1          |
| YLL007C                                          | YLL007C       | YHL002W                 | HSE1          |
| YNL215W                                          | IES2          | YDR440W                 | DOT1          |
| YMR216C                                          | SKY1          | YNL041C                 | COG6          |
| YKL139W                                          | CTK1          | YER161C                 | SPT2          |
| YFR024C-A                                        | LSB3          | YNL094W                 | APP1          |
| YDL116W                                          | NUP84         | YNL106C                 | INP52         |
| YER144C                                          | UBP5          | YKL126W                 | YPK1          |
| YKR001C                                          | VPS1          | YPR120C                 | CLB5          |

| Predictions at threshold level 0.80 continued... |               |                         |               |
|--------------------------------------------------|---------------|-------------------------|---------------|
| Gene1 of predicted pair                          |               | Gene2 of predicted pair |               |
| Systematic Name                                  | Standard Name | Systematic Name         | Standard Name |
| YIL159W                                          | BNR1          | YHR200W                 | RPN10         |
| YDR245W                                          | MNN10         | YKL160W                 | ELF1          |
| YNL215W                                          | IES2          | YDR310C                 | SUM1          |
| YBR108W                                          | YBR108W       | YDR207C                 | UME6          |
| YGR283C                                          | YGR283C       | YMR310C                 | YMR310C       |
| YLR095C                                          | IOC2          | YGL003C                 | CDH1          |
| YJR032W                                          | CPR7          | YOR368W                 | RAD17         |
| YBL003C                                          | HTA2          | YGR275W                 | RTT102        |
| YFL023W                                          | BUD27         | YLR352W                 | YLR352W       |
| YPL115C                                          | BEM3          | YHR114W                 | BZZ1          |
| YDR363W-A                                        | SEM1          | YLR306W                 | UBC12         |
| YHR134W                                          | WSS1          | YDR183W                 | PLP1          |
| YDL059C                                          | RAD59         | YML102W                 | CAC2          |
| YOR195W                                          | SLK19         | YPL161C                 | BEM4          |
| YKL010C                                          | UFD4          | YLR370C                 | ARC18         |
| YBR030W                                          | YBR030W       | YBR019C                 | GAL10         |
| YOR141C                                          | ARP8          | YKL041W                 | VPS24         |
| YBR030W                                          | YBR030W       | YMR214W                 | SCJ1          |
| YDR153C                                          | ENT5          | YNL107W                 | YAF9          |
| YKR061W                                          | KTR2          | YHR111W                 | UBA4          |
| YNL291C                                          | MID1          | YCL037C                 | SRO9          |
| YLR234W                                          | TOP3          | YMR106C                 | YKU80         |
| YIL159W                                          | BNR1          | YOL121C                 | RPS19A        |
| YOR195W                                          | SLK19         | YGL115W                 | SNF4          |
| YBL102W                                          | SFT2          | YGL054C                 | ERV14         |
| YGR019W                                          | UGA1          | YGR270W                 | YTA7          |
| YOR001W                                          | RRP6          | YDL226C                 | GCS1          |
| YLR429W                                          | CRN1          | YOR035C                 | SHE4          |
| YGL087C                                          | MMS2          | YNL107W                 | YAF9          |

| Predictions at threshold level 0.80 continued... |               |                         |               |
|--------------------------------------------------|---------------|-------------------------|---------------|
| Gene1 of predicted pair                          |               | Gene2 of predicted pair |               |
| Systematic Name                                  | Standard Name | Systematic Name         | Standard Name |
| YLR095C                                          | IOC2          | YCR053W                 | THR4          |
| YML016C                                          | PPZ1          | YCR031C                 | RPS14A        |
| YHR200W                                          | RPN10         | YJL117W                 | PHO86         |
| YPR084W                                          | YPR084W       | YLR350W                 | ORM2          |
| YBL008W                                          | HIR1          | YKR059W                 | TIF1          |
| YPL037C                                          | EGD1          | YLR452C                 | SST2          |
| YJR135C                                          | MCM22         | YJR090C                 | GRR1          |
| YOR127W                                          | RGA1          | YPL037C                 | EGD1          |
| YOR069W                                          | VPS5          | YOL018C                 | TLG2          |
| YPL037C                                          | EGD1          | YJL183W                 | MNN11         |
| YGL223C                                          | COG1          | YDR310C                 | SUM1          |
| YLR381W                                          | CTF3          | YMR202W                 | ERG2          |
| YPL018W                                          | CTF19         | YLR182W                 | SWI6          |
| YOR001W                                          | RRP6          | YPL253C                 | VIK1          |
| YER144C                                          | UBP5          | YOR290C                 | SNF2          |
| YDR443C                                          | SSN2          | YJL183W                 | MNN11         |
| YER116C                                          | SLX8          | YPR036W                 | VMA13         |
| YGL016W                                          | KAP122        | YML057W                 | CMP2          |
| YBR158W                                          | AMN1          | YGL003C                 | CDH1          |
| YGR054W                                          | YGR054W       | YIL008W                 | URM1          |
| YLR119W                                          | SRN2          | YML071C                 | COG8          |
| YHR060W                                          | VMA22         | YLR180W                 | SAM1          |
| YML062C                                          | MFT1          | YHR167W                 | THP2          |
| YDR156W                                          | RPA14         | YJL183W                 | MNN11         |
| YLR095C                                          | IOC2          | YNL041C                 | COG6          |
| YLR079W                                          | SIC1          | YJL058C                 | BIT61         |
| YHR079C                                          | IRE1          | YDR448W                 | ADA2          |
| YNL307C                                          | MCK1          | YMR038C                 | CCS1          |
| YHR200W                                          | RPN10         | YDR261C                 | EXG2          |

| Predictions at threshold level 0.80 continued... |               |                         |               |
|--------------------------------------------------|---------------|-------------------------|---------------|
| Gene1 of predicted pair                          |               | Gene2 of predicted pair |               |
| Systematic Name                                  | Standard Name | Systematic Name         | Standard Name |
| YOR337W                                          | TEA1          | YOR066W                 | MSA1          |
| YML115C                                          | VAN1          | YBR260C                 | RGD1          |
| YPL018W                                          | CTF19         | YJL095W                 | BCK1          |
| YLR234W                                          | TOP3          | YDR289C                 | RTT103        |
| YML103C                                          | NUP188        | YIR005W                 | IST3          |
| YDR108W                                          | GSG1          | YGR105W                 | VMA21         |
| YGR133W                                          | PEX4          | YBR181C                 | RPS6B         |
| YER116C                                          | SLX8          | YPL018W                 | CTF19         |
| YGL174W                                          | BUD13         | YDR363W-A               | SEM1          |
| YNL325C                                          | FIG4          | YDR261C                 | EXG2          |
| YCL001W                                          | RER1          | YOR327C                 | SNC2          |
| YNL248C                                          | RPA49         | YJL006C                 | CTK2          |
| YGR054W                                          | YGR054W       | YGL124C                 | MON1          |
| YBL008W                                          | HIR1          | YMR198W                 | CIK1          |
| YBR215W                                          | HPC2          | YNL199C                 | GCR2          |
| YLR234W                                          | TOP3          | YGR054W                 | YGR054W       |
| YGL147C                                          | RPL9A         | YEL053C                 | MAK10         |
| YJR140C                                          | HIR3          | YBR215W                 | HPC2          |
| YDR383C                                          | NKP1          | YDR174W                 | HMO1          |
| YPR049C                                          | ATG11         | YOL082W                 | ATG19         |
| YJL060W                                          | BNA3          | YOR195W                 | SLK19         |
| YML115C                                          | VAN1          | YNL058C                 | YNL058C       |
| YHR081W                                          | LRP1          | YFR036W                 | CDC26         |
| YGR108W                                          | CLB1          | YJR060W                 | CBF1          |
| YLR119W                                          | SRN2          | YDR137W                 | RGP1          |
| YDL083C                                          | RPS16B        | YDR261C                 | EXG2          |
| YDR484W                                          | VPS52         | YHR161C                 | YAP1801       |
| YNL201C                                          | PSY2          | YDR254W                 | CHL4          |
| YGL025C                                          | PGD1          | YGL003C                 | CDH1          |



| Predictions at threshold level 0.80 continued... |               |                         |               |
|--------------------------------------------------|---------------|-------------------------|---------------|
| Gene1 of predicted pair                          |               | Gene2 of predicted pair |               |
| Systematic Name                                  | Standard Name | Systematic Name         | Standard Name |
| YDL116W                                          | NUP84         | YML028W                 | TSA1          |
| YPL050C                                          | MNN9          | YNL238W                 | KEX2          |
| YPR084W                                          | YPR084W       | YOR132W                 | VPS17         |
| YLR119W                                          | SRN2          | YPR030W                 | CSR2          |
| YDR363W-A                                        | SEM1          | YOR124C                 | UBP2          |
| YMR224C                                          | MRE11         | YLR398C                 | SKI2          |
| YMR224C                                          | MRE11         | YBR057C                 | MUM2          |
| YOR358W                                          | HAP5          | YNL107W                 | YAF9          |
| YJL006C                                          | CTK2          | YHL002W                 | HSE1          |
| YPL042C                                          | SSN3          | YNL199C                 | GCR2          |
| YGR252W                                          | GCN5          | YPL256C                 | CLN2          |
| YMR202W                                          | ERG2          | YPL161C                 | BEM4          |
| YLR315W                                          | NKP2          | YIR005W                 | IST3          |
| YLR234W                                          | TOP3          | YER161C                 | SPT2          |
| YHR134W                                          | WSS1          | YCR086W                 | CSM1          |
| YPL037C                                          | EGD1          | YNL076W                 | MKS1          |
| YPL178W                                          | CBC2          | YPL256C                 | CLN2          |
| YGL151W                                          | NUT1          | YOL067C                 | RTG1          |
| YFR010W                                          | UBP6          | YGL124C                 | MON1          |
| YBR107C                                          | IML3          | YKL101W                 | HSL1          |
| YOR140W                                          | SFL1          | YOR008C                 | SLG1          |
| YLR090W                                          | XDJ1          | YCR053W                 | THR4          |
| YNL288W                                          | CAF40         | YJL183W                 | MNN11         |
| YDR004W                                          | RAD57         | YGL175C                 | SAE2          |
| YDR378C                                          | LSM6          | YEL013W                 | VAC8          |
| YOR290C                                          | SNF2          | YLR176C                 | RFX1          |
| YOR337W                                          | TEA1          | YOL121C                 | RPS19A        |
| YGL147C                                          | RPL9A         | YOL081W                 | IRA2          |
| YPL037C                                          | EGD1          | YLR180W                 | SAM1          |

| Predictions at threshold level 0.80 continued... |               |                         |               |
|--------------------------------------------------|---------------|-------------------------|---------------|
| Gene1 of predicted pair                          |               | Gene2 of predicted pair |               |
| Systematic Name                                  | Standard Name | Systematic Name         | Standard Name |
| YDR244W                                          | PEX5          | YDL078C                 | MDH3          |
| YNL243W                                          | SLA2          | YIL084C                 | SDS3          |
| YGL078C                                          | DBP3          | YBR108W                 | YBR108W       |
| YCR020C-A                                        | MAK31         | YDR202C                 | RAV2          |
| YMR116C                                          | ASC1          | YFR036W                 | CDC26         |
| YMR224C                                          | MRE11         | YER040W                 | GLN3          |
| YNR072W                                          | HXT17         | YPR046W                 | MCM16         |
| YLR386W                                          | VAC14         | YPR046W                 | MCM16         |
| YDR378C                                          | LSM6          | YOR124C                 | UBP2          |
| YGR104C                                          | SRB5          | YMR199W                 | CLN1          |
| YDR108W                                          | GSG1          | YML001W                 | YPT7          |
| YPL256C                                          | CLN2          | YGR152C                 | RSR1          |
| YMR025W                                          | CSI1          | YOL117W                 | RRI2          |
| YGR072W                                          | UPF3          | YNL051W                 | COG5          |
| YER110C                                          | KAP123        | YPR046W                 | MCM16         |
| YBR217W                                          | ATG12         | YKR035W-A               | DID2          |
| YDL101C                                          | DUN1          | YAL015C                 | NTG1          |
| YMR224C                                          | MRE11         | YOL121C                 | RPS19A        |
| YMR022W                                          | UBC7          | YDR310C                 | SUM1          |
| YDL077C                                          | VAM6          | YLR370C                 | ARC18         |
| YLR320W                                          | MMS22         | YNL041C                 | COG6          |
| YGL212W                                          | VAM7          | YPL161C                 | BEM4          |
| YDR379W                                          | RGA2          | YKL101W                 | HSL1          |
| YLR094C                                          | GIS3          | YJR025C                 | BNA1          |
| YDL192W                                          | ARF1          | YMR230W                 | RPS10B        |
| YOR141C                                          | ARP8          | YGL252C                 | RTG2          |
| YKR099W                                          | BAS1          | YPL137C                 | GIP3          |
| YNR052C                                          | POP2          | YGR252W                 | GCN5          |
| YMR016C                                          | SOK2          | YJL095W                 | BCK1          |

| Predictions at threshold level 0.80 continued... |               |                         |               |
|--------------------------------------------------|---------------|-------------------------|---------------|
| Gene1 of predicted pair                          |               | Gene2 of predicted pair |               |
| Systematic Name                                  | Standard Name | Systematic Name         | Standard Name |
| YLR234W                                          | TOP3          | YLR452C                 | SST2          |
| YNL145W                                          | MFA2          | YNL147W                 | LSM7          |
| YLR292C                                          | SEC72         | YML016C                 | PPZ1          |
| YMR133W                                          | REC114        | YLR398C                 | SKI2          |
| YIL034C                                          | CAP2          | YGL253W                 | HXK2          |
| YLR095C                                          | IOC2          | YLR452C                 | SST2          |
| YBR084C-A                                        | RPL19A        | YDR363W-A               | SEM1          |
| YDR137W                                          | RGP1          | YNL199C                 | GCR2          |
| YDR293C                                          | SSD1          | YMR004W                 | MVP1          |
| YBR239C                                          | YBR239C       | YGR268C                 | HUA1          |
| YGL134W                                          | PCL10         | YLR258W                 | GSY2          |
| YLR192C                                          | HCR1          | YKL048C                 | ELM1          |
| YFR010W                                          | UBP6          | YMR311C                 | GLC8          |
| YAL024C                                          | LTE1          | YMR153W                 | NUP53         |
| YDR318W                                          | MCM21         | YLR182W                 | SWI6          |
| YER162C                                          | RAD4          | YER040W                 | GLN3          |
| YDR004W                                          | RAD57         | YGL087C                 | MMS2          |
| YIL159W                                          | BNR1          | YBL025W                 | RRN10         |
| YHR039C-A                                        | VMA10         | YER139C                 | YER139C       |
| YNL058C                                          | YNL058C       | YJR032W                 | CPR7          |
| YJL124C                                          | LSM1          | YGL163C                 | RAD54         |
| YPL105C                                          | YPL105C       | YDR153C                 | ENT5          |
| YBR194W                                          | SOY1          | YJR140C                 | HIR3          |
| YKR059W                                          | TIF1          | YDR310C                 | SUM1          |
| YNL259C                                          | ATX1          | YBL047C                 | EDE1          |
| YBL058W                                          | SHP1          | YPL037C                 | EGD1          |
| YPL037C                                          | EGD1          | YBR036C                 | CSG2          |
| YHR161C                                          | YAP1801       | YDR323C                 | PEP7          |
| YER162C                                          | RAD4          | YGR188C                 | BUB1          |

| Predictions at threshold level 0.80 continued... |               |                         |               |
|--------------------------------------------------|---------------|-------------------------|---------------|
| Gene1 of predicted pair                          |               | Gene2 of predicted pair |               |
| Systematic Name                                  | Standard Name | Systematic Name         | Standard Name |
| YNL069C                                          | RPL16B        | YDR320C                 | SWA2          |
| YPL180W                                          | TCO89         | YDL006W                 | PTC1          |
| YBR200W                                          | BEM1          | YHR039C-A               | VMA10         |
| YIL076W                                          | SEC28         | YOL111C                 | MDY2          |
| YDR389W                                          | SAC7          | YPL161C                 | BEM4          |
| YHR156C                                          | LIN1          | YPL057C                 | SUR1          |
| YIL053W                                          | RHR2          | YML115C                 | VAN1          |
| YGL087C                                          | MMS2          | YGR019W                 | UGA1          |
| YMR198W                                          | CIK1          | YGL003C                 | CDH1          |
| YAL024C                                          | LTE1          | YMR016C                 | SOK2          |
| YCL037C                                          | SRO9          | YNL127W                 | FAR11         |
| YBL058W                                          | SHP1          | YLR371W                 | ROM2          |
| YHL031C                                          | GOS1          | YCL001W                 | RER1          |
| YDR379W                                          | RGA2          | YBL047C                 | EDE1          |
| YOL043C                                          | NTG2          | YMR055C                 | BUB2          |
| YBR041W                                          | FAT1          | YMR313C                 | TGL3          |
| YIL076W                                          | SEC28         | YLR370C                 | ARC18         |
| YKL048C                                          | ELM1          | YPL137C                 | GIP3          |
| YMR004W                                          | MVP1          | YPR032W                 | SRO7          |
| YGR261C                                          | APL6          | YMR004W                 | MVP1          |
| YPL022W                                          | RAD1          | YJR035W                 | RAD26         |
| YOR043W                                          | WHI2          | YCR077C                 | PAT1          |
| YPR030W                                          | CSR2          | YFR036W                 | CDC26         |
| YKL129C                                          | MYO3          | YHR114W                 | BZZ1          |
| YOR008C                                          | SLG1          | YHR012W                 | VPS29         |
| YBR215W                                          | HPC2          | YOR043W                 | WHI2          |
| YAL024C                                          | LTE1          | YNL238W                 | KEX2          |
| YMR224C                                          | MRE11         | YNL054W                 | VAC7          |
| YMR106C                                          | YKU80         | YLR233C                 | EST1          |

| Predictions at threshold level 0.80 continued... |               |                         |               |
|--------------------------------------------------|---------------|-------------------------|---------------|
| Gene1 of predicted pair                          |               | Gene2 of predicted pair |               |
| Systematic Name                                  | Standard Name | Systematic Name         | Standard Name |
| YML115C                                          | VAN1          | YBR127C                 | VMA2          |
| YDR174W                                          | HMO1          | YBR107C                 | IML3          |
| YKL135C                                          | APL2          | YOR035C                 | SHE4          |
| YBR194W                                          | SOY1          | YJR035W                 | RAD26         |
| YAL024C                                          | LTE1          | YLR337C                 | VRP1          |
| YBR200W                                          | BEM1          | YKL048C                 | ELM1          |
| YLR381W                                          | CTF3          | YOR141C                 | ARP8          |
| YEL065W                                          | SIT1          | YKR099W                 | BAS1          |
| YNL307C                                          | MCK1          | YJR063W                 | RPA12         |
| YHR178W                                          | STB5          | YOR043W                 | WHI2          |
| YOR127W                                          | RGA1          | YMR109W                 | MYO5          |
| YPL037C                                          | EGD1          | YGR105W                 | VMA21         |
| YCR039C                                          | MATALPHA2     | YCR084C                 | TUP1          |
| YMR055C                                          | BUB2          | YGL003C                 | CDH1          |
| YAL051W                                          | OAF1          | YKR001C                 | VPS1          |
| YPR036W                                          | VMA13         | YLR093C                 | NYV1          |
| YMR016C                                          | SOK2          | YHR039C-A               | VMA10         |
| YGR108W                                          | CLB1          | YBR107C                 | IML3          |
| YNL307C                                          | MCK1          | YDR261C                 | EXG2          |
| YPR018W                                          | RLF2          | YPL057C                 | SUR1          |
| YCR020C-A                                        | MAK31         | YER122C                 | GLO3          |
| YBR030W                                          | YBR030W       | YDR358W                 | GGA1          |
| YNR032W                                          | PPG1          | YNL107W                 | YAF9          |
| YMR008C                                          | PLB1          | YMR127C                 | SAS2          |
| YPL152W                                          | RRD2          | YGL252C                 | RTG2          |
| YDL116W                                          | NUP84         | YPR046W                 | MCM16         |
| YKL048C                                          | ELM1          | YDR183W                 | PLP1          |
| YDR129C                                          | SAC6          | YML115C                 | VAN1          |
| YDR477W                                          | SNF1          | YDR484W                 | VPS52         |

| Predictions at threshold level 0.80 continued... |               |                         |               |
|--------------------------------------------------|---------------|-------------------------|---------------|
| Gene1 of predicted pair                          |               | Gene2 of predicted pair |               |
| Systematic Name                                  | Standard Name | Systematic Name         | Standard Name |
| YGL078C                                          | DBP3          | YLR441C                 | RPS1A         |
| YOR358W                                          | HAP5          | YIL008W                 | URM1          |
| YMR224C                                          | MRE11         | YNL325C                 | FIG4          |
| YDR146C                                          | SWI5          | YGL163C                 | RAD54         |
| YOR127W                                          | RGA1          | YDR310C                 | SUM1          |
| YJR005W                                          | APL1          | YJR035W                 | RAD26         |
| YKR001C                                          | VPS1          | YAR014C                 | BUD14         |
| YLL007C                                          | YLL007C       | YDR254W                 | CHL4          |
| YOR008C                                          | SLG1          | YLR425W                 | TUS1          |
| YIL076W                                          | SEC28         | YGL025C                 | PGD1          |
| YGR249W                                          | MGA1          | YLR320W                 | MMS22         |
| YDR293C                                          | SSD1          | YBR119W                 | MUD1          |
| YGL060W                                          | YBP2          | YMR055C                 | BUB2          |
| YOR106W                                          | VAM3          | YLR093C                 | NYV1          |
| YGR209C                                          | TRX2          | YLR309C                 | IMH1          |
| YIL053W                                          | RHR2          | YLR094C                 | GIS3          |
| YDR383C                                          | NKP1          | YHR115C                 | DMA1          |
| YNL288W                                          | CAF40         | YDR289C                 | RTT103        |
| YPR018W                                          | RLF2          | YBR215W                 | HPC2          |
| YFR010W                                          | UBP6          | YPL022W                 | RAD1          |
| YJR032W                                          | CPR7          | YHR114W                 | BZZ1          |
| YGR135W                                          | PRE9          | YLR371W                 | ROM2          |
| YNL087W                                          | TCB2          | YER122C                 | GLO3          |
| YLR381W                                          | CTF3          | YML016C                 | PPZ1          |
| YDR363W-A                                        | SEM1          | YEL013W                 | VAC8          |
| YLR452C                                          | SST2          | YLR320W                 | MMS22         |
| YDR443C                                          | SSN2          | YER116C                 | SLX8          |
| YMR127C                                          | SAS2          | YGL253W                 | HXK2          |
| YNL291C                                          | MID1          | YHR012W                 | VPS29         |

| Predictions at threshold level 0.80 continued... |               |                         |               |
|--------------------------------------------------|---------------|-------------------------|---------------|
| Gene1 of predicted pair                          |               | Gene2 of predicted pair |               |
| Systematic Name                                  | Standard Name | Systematic Name         | Standard Name |
| YMR026C                                          | PEX12         | YML115C                 | VAN1          |
| YMR153W                                          | NUP53         | YNL307C                 | MCK1          |
| YKL032C                                          | IXR1          | YKL048C                 | ELM1          |
| YOR101W                                          | RAS1          | YPL018W                 | CTF19         |
| YOR043W                                          | WHI2          | YDR261C                 | EXG2          |
| YBL103C                                          | RTG3          | YML071C                 | COG8          |
| YHR205W                                          | SCH9          | YLR371W                 | ROM2          |
| YOL121C                                          | RPS19A        | YJL095W                 | BCK1          |
| YNL325C                                          | FIG4          | YMR153W                 | NUP53         |
| YNL297C                                          | MON2          | YPR032W                 | SRO7          |
| YPL037C                                          | EGD1          | YGL124C                 | MON1          |
| YER110C                                          | KAP123        | YOR358W                 | HAP5          |
| YKL139W                                          | CTK1          | YER040W                 | GLN3          |
| YNL297C                                          | MON2          | YCR066W                 | RAD18         |
| YPR167C                                          | MET16         | YLR043C                 | TRX1          |
| YHR039C-A                                        | VMA10         | YNR032W                 | PPG1          |
| YEL065W                                          | SIT1          | YML115C                 | VAN1          |
| YJR024C                                          | MDE1          | YPL246C                 | RBD2          |
| YJL124C                                          | LSM1          | YOR320C                 | GNT1          |
| YOR156C                                          | NFI1          | YHR115C                 | DMA1          |
| YGL190C                                          | CDC55         | YML124C                 | TUB3          |
| YKR020W                                          | VPS51         | YLR425W                 | TUS1          |
| YEL065W                                          | SIT1          | YGL025C                 | PGD1          |
| YPL022W                                          | RAD1          | YGL175C                 | SAE2          |
| YPL057C                                          | SUR1          | YLR452C                 | SST2          |
| YBR194W                                          | SOY1          | YGR270W                 | YTA7          |
| YPL213W                                          | LEA1          | YJR050W                 | ISY1          |
| YBR171W                                          | SEC66         | YLR094C                 | GIS3          |
| YMR116C                                          | ASC1          | YDR207C                 | UME6          |

| Predictions at threshold level 0.80 continued... |               |                         |               |
|--------------------------------------------------|---------------|-------------------------|---------------|
| Gene1 of predicted pair                          |               | Gene2 of predicted pair |               |
| Systematic Name                                  | Standard Name | Systematic Name         | Standard Name |
| YBL008W                                          | HIR1          | YPL018W                 | CTF19         |
| YOR038C                                          | HIR2          | YCR086W                 | CSM1          |
| YBL079W                                          | NUP170        | YGR059W                 | SPR3          |
| YML115C                                          | VAN1          | YML001W                 | YPT7          |
| YLR370C                                          | ARC18         | YLR180W                 | SAM1          |
| YNL236W                                          | SIN4          | YNL238W                 | KEX2          |
| YFR032C-A                                        | RPL29         | YBR082C                 | UBC4          |
| YPR084W                                          | YPR084W       | YGR270W                 | YTA7          |
| YNL016W                                          | PUB1          | YDR207C                 | UME6          |
| YER161C                                          | SPT2          | YKL160W                 | ELF1          |
| YOR127W                                          | RGA1          | YBR107C                 | IML3          |
| YDL059C                                          | RAD59         | YPR120C                 | CLB5          |
| YLR320W                                          | MMS22         | YCR053W                 | THR4          |
| YJL172W                                          | CPS1          | YLR320W                 | MMS22         |
| YMR127C                                          | SAS2          | YOL067C                 | RTG1          |
| YJR040W                                          | GEF1          | YDL077C                 | VAM6          |
| YOR080W                                          | DIA2          | YPL022W                 | RAD1          |
| YNL291C                                          | MID1          | YIL076W                 | SEC28         |
| YDR004W                                          | RAD57         | YOR033C                 | EXO1          |
| YBR217W                                          | ATG12         | YEL060C                 | PRB1          |
| YOR270C                                          | VPH1          | YBR280C                 | SAF1          |
| YDL101C                                          | DUN1          | YGL031C                 | RPL24A        |
| YPL161C                                          | BEM4          | YJL006C                 | CTK2          |
| YHR013C                                          | ARD1          | YDR318W                 | MCM21         |
| YPL152W                                          | RRD2          | YIR005W                 | IST3          |
| YAL024C                                          | LTE1          | YDR310C                 | SUM1          |
| YLR006C                                          | SSK1          | YDR310C                 | SUM1          |
| YBL103C                                          | RTG3          | YLR320W                 | MMS22         |
| YDR378C                                          | LSM6          | YGR270W                 | YTA7          |



| Predictions at threshold level 0.80 continued... |               |                         |               |
|--------------------------------------------------|---------------|-------------------------|---------------|
| Gene1 of predicted pair                          |               | Gene2 of predicted pair |               |
| Systematic Name                                  | Standard Name | Systematic Name         | Standard Name |
| YGL135W                                          | RPL1B         | YKR020W                 | VPS51         |
| YML103C                                          | NUP188        | YPR046W                 | MCM16         |
| YDL006W                                          | PTC1          | YNL107W                 | YAF9          |
| YMR142C                                          | RPL13B        | YER139C                 | YER139C       |
| YOR270C                                          | VPH1          | YER122C                 | GLO3          |
| YDR245W                                          | MNN10         | YKL032C                 | IXR1          |
| YIL008W                                          | URM1          | YJL095W                 | BCK1          |
| YNL238W                                          | KEX2          | YBL025W                 | RRN10         |
| YBR200W                                          | BEM1          | YGR135W                 | PRE9          |
| YHL027W                                          | RIM101        | YJR032W                 | CPR7          |
| YEL056W                                          | HAT2          | YAR014C                 | BUD14         |
| YHR111W                                          | UBA4          | YHL002W                 | HSE1          |
| YPL161C                                          | BEM4          | YDL077C                 | VAM6          |
| YOR069W                                          | VPS5          | YDR080W                 | VPS41         |
| YOR127W                                          | RGA1          | YGL237C                 | HAP2          |
| YHL031C                                          | GOS1          | YNL238W                 | KEX2          |
| YIL159W                                          | BNR1          | YKL048C                 | ELM1          |
| YJR090C                                          | GRR1          | YBR114W                 | RAD16         |
| YOR212W                                          | STE4          | YFL026W                 | STE2          |
| YDR293C                                          | SSD1          | YOL067C                 | RTG1          |
| YML115C                                          | VAN1          | YJL172W                 | CPS1          |
| YLR292C                                          | SEC72         | YDR293C                 | SSD1          |
| YDL101C                                          | DUN1          | YBL019W                 | APN2          |
| YLR399C                                          | BDF1          | YLR410W                 | VIP1          |
| YLR018C                                          | POM34         | YMR125W                 | STO1          |
| YJR060W                                          | CBF1          | YDL006W                 | PTC1          |
| YPR120C                                          | CLB5          | YJR135C                 | MCM22         |
| YPL057C                                          | SUR1          | YDR469W                 | SDC1          |
| YCR066W                                          | RAD18         | YHR056C                 | RSC30         |

| Predictions at threshold level 0.80 continued... |               |                         |               |
|--------------------------------------------------|---------------|-------------------------|---------------|
| Gene1 of predicted pair                          |               | Gene2 of predicted pair |               |
| Systematic Name                                  | Standard Name | Systematic Name         | Standard Name |
| YIL076W                                          | SEC28         | YDL006W                 | PTC1          |
| YMR311C                                          | GLC8          | YBR280C                 | SAF1          |
| YOR106W                                          | VAM3          | YPL037C                 | EGD1          |
| YKR020W                                          | VPS51         | YLR320W                 | MMS22         |
| YPL037C                                          | EGD1          | YPL161C                 | BEM4          |
| YDR289C                                          | RTT103        | YLR182W                 | SWI6          |
| YOL018C                                          | TLG2          | YDL077C                 | VAM6          |
| YOR195W                                          | SLK19         | YLR370C                 | ARC18         |
| YNL044W                                          | YIP3          | YKL119C                 | VPH2          |
| YIL159W                                          | BNR1          | YHR156C                 | LIN1          |
| YOL121C                                          | RPS19A        | YER139C                 | YER139C       |
| YDR477W                                          | SNF1          | YGL124C                 | MON1          |
| YDR443C                                          | SSN2          | YLR452C                 | SST2          |
| YOR290C                                          | SNF2          | YHL025W                 | SNF6          |
| YBL027W                                          | RPL19B        | YDR289C                 | RTT103        |
| YIR009W                                          | MSL1          | YMR125W                 | STO1          |
| YBR283C                                          | SSH1          | YDR310C                 | SUM1          |
| YDR484W                                          | VPS52         | YDL161W                 | ENT1          |
| YPL234C                                          | TFP3          | YDR207C                 | UME6          |
| YKL101W                                          | HSL1          | YDR207C                 | UME6          |
| YPR051W                                          | MAK3          | YNL297C                 | MON2          |
| YHR134W                                          | WSS1          | YJL124C                 | LSM1          |
| YOR140W                                          | SFL1          | YOR106W                 | VAM3          |
| YNL201C                                          | PSY2          | YLR315W                 | NKP2          |
| YFL026W                                          | STE2          | YPL187W                 | MF(ALPHA)1    |
| YBL047C                                          | EDE1          | YDR310C                 | SUM1          |
| YOR358W                                          | HAP5          | YDL155W                 | CLB3          |
| YOR035C                                          | SHE4          | YEL060C                 | PRB1          |
| YCR081W                                          | SRB8          | YML115C                 | VAN1          |

| Predictions at threshold level 0.80 continued... |               |                         |               |
|--------------------------------------------------|---------------|-------------------------|---------------|
| Gene1 of predicted pair                          |               | Gene2 of predicted pair |               |
| Systematic Name                                  | Standard Name | Systematic Name         | Standard Name |
| YNL291C                                          | MID1          | YLR150W                 | STM1          |
| YOR270C                                          | VPH1          | YEL060C                 | PRB1          |
| YDR443C                                          | SSN2          | YLR119W                 | SRN2          |
| YBR194W                                          | SOY1          | YBR215W                 | HPC2          |
| YJR125C                                          | ENT3          | YHR108W                 | GGA2          |
| YMR054W                                          | STV1          | YOR327C                 | SNC2          |
| YNL325C                                          | FIG4          | YLR441C                 | RPS1A         |
| YER110C                                          | KAP123        | YDR335W                 | MSN5          |
| YPL152W                                          | RRD2          | YOL054W                 | PSH1          |
| YPL253C                                          | VIK1          | YDR456W                 | NHX1          |
| YBR278W                                          | DPB3          | YOR368W                 | RAD17         |
| YBL103C                                          | RTG3          | YER162C                 | RAD4          |
| YOR132W                                          | VPS17         | YER120W                 | SCS2          |
| YPL024W                                          | RMI1          | YOL081W                 | IRA2          |
| YFR010W                                          | UBP6          | YBR019C                 | GAL10         |
| YDR318W                                          | MCM21         | YOL081W                 | IRA2          |
| YFR031C-A                                        | RPL2A         | YLR320W                 | MMS22         |
| YGR241C                                          | YAP1802       | YOR036W                 | PEP12         |
| YLR399C                                          | BDF1          | YOL081W                 | IRA2          |
| YDL077C                                          | VAM6          | YDR310C                 | SUM1          |
| YDR076W                                          | RAD55         | YKL101W                 | HSL1          |
| YIL076W                                          | SEC28         | YCR053W                 | THR4          |
| YHR111W                                          | UBA4          | YAR014C                 | BUD14         |
| YGL078C                                          | DBP3          | YDR310C                 | SUM1          |
| YBR267W                                          | REI1          | YKR048C                 | NAP1          |
| YML115C                                          | VAN1          | YBR019C                 | GAL10         |
| YDL184C                                          | RPL41A        | YNL087W                 | TCB2          |
| YOR195W                                          | SLK19         | YPR036W                 | VMA13         |
| YDR320C                                          | SWA2          | YML071C                 | COG8          |

| Predictions at threshold level 0.80 continued... |               |                         |               |
|--------------------------------------------------|---------------|-------------------------|---------------|
| Gene1 of predicted pair                          |               | Gene2 of predicted pair |               |
| Systematic Name                                  | Standard Name | Systematic Name         | Standard Name |
| YMR116C                                          | ASC1          | YDL155W                 | CLB3          |
| YOR127W                                          | RGA1          | YGL253W                 | HXK2          |
| YNL307C                                          | MCK1          | YMR152W                 | YIM1          |
| YMR231W                                          | PEP5          | YDR323C                 | PEP7          |
| YML016C                                          | PPZ1          | YJL183W                 | MNN11         |
| YHR073W                                          | OSH3          | YMR199W                 | CLN1          |
| YOL061W                                          | PRS5          | YER099C                 | PRS2          |
| YPL161C                                          | BEM4          | YFR036W                 | CDC26         |
| YOR038C                                          | HIR2          | YEL013W                 | VAC8          |
| YBR173C                                          | UMP1          | YMR284W                 | YKU70         |
| YGL147C                                          | RPL9A         | YBR173C                 | UMP1          |
| YIL162W                                          | SUC2          | YOR085W                 | OST3          |
| YCL001W                                          | RER1          | YDR207C                 | UME6          |
| YOR127W                                          | RGA1          | YPR046W                 | MCM16         |
| YBL103C                                          | RTG3          | YBR019C                 | GAL10         |
| YGL115W                                          | SNF4          | YDR200C                 | VPS64         |
| YMR026C                                          | PEX12         | YDR484W                 | VPS52         |
| YNL291C                                          | MID1          | YFR036W                 | CDC26         |
| YOR076C                                          | SKI7          | YFR010W                 | UBP6          |
| YPL137C                                          | GIP3          | YPL195W                 | APL5          |
| YDL020C                                          | RPN4          | YPL253C                 | VIK1          |
| YPL213W                                          | LEA1          | YBL101C                 | ECM21         |
| YPL115C                                          | BEM3          | YNL107W                 | YAF9          |
| YJR060W                                          | CBF1          | YLR254C                 | NDL1          |
| YNL166C                                          | BNI5          | YLR447C                 | VMA6          |
| YDL077C                                          | VAM6          | YPR032W                 | SRO7          |
| YML016C                                          | PPZ1          | YLR254C                 | NDL1          |
| YER087C-B                                        | SBH1          | YMR223W                 | UBP8          |
| YGR261C                                          | APL6          | YMR216C                 | SKY1          |

| Predictions at threshold level 0.80 continued... |               |                         |               |
|--------------------------------------------------|---------------|-------------------------|---------------|
| Gene1 of predicted pair                          |               | Gene2 of predicted pair |               |
| Systematic Name                                  | Standard Name | Systematic Name         | Standard Name |
| YNL079C                                          | TPM1          | YOR035C                 | SHE4          |
| YMR231W                                          | PEP5          | YJR090C                 | GRR1          |
| YHR010W                                          | RPL27A        | YLR352W                 | YLR352W       |
| YIL076W                                          | SEC28         | YPL120W                 | VPS30         |
| YNL307C                                          | MCK1          | YHR200W                 | RPN10         |
| YBR200W                                          | BEM1          | YLR093C                 | NYV1          |
| YDR137W                                          | RGP1          | YER162C                 | RAD4          |
| YDR329C                                          | PEX3          | YAL055W                 | PEX22         |
| YOR132W                                          | VPS17         | YEL053C                 | MAK10         |
| YOR127W                                          | RGA1          | YHL002W                 | HSE1          |
| YBR126C                                          | TPS1          | YML001W                 | YPT7          |
| YPL256C                                          | CLN2          | YHR010W                 | RPL27A        |
| YMR284W                                          | YKU70         | YGL163C                 | RAD54         |
| YIL053W                                          | RHR2          | YER139C                 | YER139C       |
| YMR284W                                          | YKU70         | YNR052C                 | POP2          |
| YOR112W                                          | CEX1          | YER122C                 | GLO3          |
| YJL036W                                          | SNX4          | YPR032W                 | SRO7          |
| YGR270W                                          | YTA7          | YLR233C                 | EST1          |
| YMR202W                                          | ERG2          | YPR046W                 | MCM16         |
| YMR109W                                          | MYO5          | YDR144C                 | MKC7          |
| YLR192C                                          | HCR1          | YER144C                 | UBP5          |
| YLR043C                                          | TRX1          | YLR093C                 | NYV1          |
| YMR004W                                          | MVP1          | YKL119C                 | VPH2          |
| YLR309C                                          | IMH1          | YOL108C                 | INO4          |
| YDL083C                                          | RPS16B        | YLR180W                 | SAM1          |
| YDR076W                                          | RAD55         | YJR090C                 | GRR1          |
| YML115C                                          | VAN1          | YLR370C                 | ARC18         |
| YNL041C                                          | COG6          | YDR207C                 | UME6          |
| YMR095C                                          | SNO1          | YLR093C                 | NYV1          |

| Predictions at threshold level 0.80 continued... |               |                         |               |
|--------------------------------------------------|---------------|-------------------------|---------------|
| Gene1 of predicted pair                          |               | Gene2 of predicted pair |               |
| Systematic Name                                  | Standard Name | Systematic Name         | Standard Name |
| YOR069W                                          | VPS5          | YLR309C                 | IMH1          |
| YFL013C                                          | IES1          | YER139C                 | YER139C       |
| YKR020W                                          | VPS51         | YBR181C                 | RPS6B         |
| YBR200W                                          | BEM1          | YNL079C                 | TPM1          |
| YNL041C                                          | COG6          | YPL195W                 | APL5          |
| YJR032W                                          | CPR7          | YLR233C                 | EST1          |
| YML038C                                          | YMD8          | YER122C                 | GLO3          |
| YDR484W                                          | VPS52         | YPR046W                 | MCM16         |
| YBR108W                                          | YBR108W       | YBR280C                 | SAF1          |
| YKL048C                                          | ELM1          | YML112W                 | CTK3          |
| YER144C                                          | UBP5          | YGL212W                 | VAM7          |
| YNL135C                                          | FPR1          | YOR208W                 | PTP2          |
| YHR178W                                          | STB5          | YJL183W                 | MNN11         |
| YFL013C                                          | IES1          | YDR440W                 | DOT1          |
| YKR020W                                          | VPS51         | YEL042W                 | GDA1          |
| YGR072W                                          | UPF3          | YHR167W                 | THP2          |
| YBR171W                                          | SEC66         | YOR327C                 | SNC2          |
| YHR084W                                          | STE12         | YMR164C                 | MSS11         |
| YNL021W                                          | HDA1          | YPR179C                 | HDA3          |
| YMR026C                                          | PEX12         | YJL172W                 | CPS1          |
| YNL044W                                          | YIP3          | YLR447C                 | VMA6          |
| YPR017C                                          | DSS4          | YPL195W                 | APL5          |
| YMR016C                                          | SOK2          | YJL164C                 | TPK1          |
| YDL002C                                          | NHP10         | YGR270W                 | YTA7          |
| YOR132W                                          | VPS17         | YJL053W                 | PEP8          |
| YKL139W                                          | CTK1          | YNL076W                 | MKS1          |
| YHR156C                                          | LIN1          | YLR386W                 | VAC14         |
| YGR135W                                          | PRE9          | YLR182W                 | SWI6          |
| YGR019W                                          | UGA1          | YDR183W                 | PLP1          |

| Predictions at threshold level 0.80 continued... |               |                         |               |
|--------------------------------------------------|---------------|-------------------------|---------------|
| Gene1 of predicted pair                          |               | Gene2 of predicted pair |               |
| Systematic Name                                  | Standard Name | Systematic Name         | Standard Name |
| YDR440W                                          | DOT1          | YER122C                 | GLO3          |
| YDR225W                                          | HTA1          | YGR184C                 | UBR1          |
| YDL020C                                          | RPN4          | YDR183W                 | PLP1          |
| YHR134W                                          | WSS1          | YJR140C                 | HIR3          |
| YLR102C                                          | APC9          | YML095C                 | RAD10         |
| YBR108W                                          | YBR108W       | YFR036W                 | CDC26         |
| YIL132C                                          | CSM2          | YLR376C                 | PSY3          |
| YGL163C                                          | RAD54         | YKL101W                 | HSL1          |
| YOR270C                                          | VPH1          | YJL183W                 | MNN11         |
| YBR200W                                          | BEM1          | YBR280C                 | SAF1          |
| YGL190C                                          | CDC55         | YPL269W                 | KAR9          |
| YMR026C                                          | PEX12         | YER139C                 | YER139C       |
| YEL051W                                          | VMA8          | YNR032W                 | PPG1          |
| YER144C                                          | UBP5          | YLR370C                 | ARC18         |
| YNL297C                                          | MON2          | YCR086W                 | CSM1          |
| YGL133W                                          | ITC1          | YOR304W                 | ISW2          |
| YPL024W                                          | RMI1          | YNL106C                 | INP52         |
| YDR318W                                          | MCM21         | YJL183W                 | MNN11         |
| YJR032W                                          | CPR7          | YJR090C                 | GRR1          |
| YCR020C-A                                        | MAK31         | YGR105W                 | VMA21         |
| YLR288C                                          | MEC3          | YFL023W                 | BUD27         |
| YJR135C                                          | MCM22         | YLR233C                 | EST1          |
| YJL004C                                          | SYS1          | YDR153C                 | ENT5          |
| YDL002C                                          | NHP10         | YOR368W                 | RAD17         |
| YLR192C                                          | HCR1          | YLR320W                 | MMS22         |
| YKL126W                                          | YPK1          | YGL124C                 | MON1          |
| YNR072W                                          | HXT17         | YOR066W                 | MSA1          |
| YBR057C                                          | MUM2          | YDL013W                 | SLX5          |
| YLR320W                                          | MMS22         | YPR046W                 | MCM16         |

| Predictions at threshold level 0.80 continued... |               |                         |               |
|--------------------------------------------------|---------------|-------------------------|---------------|
| Gene1 of predicted pair                          |               | Gene2 of predicted pair |               |
| Systematic Name                                  | Standard Name | Systematic Name         | Standard Name |
| YDR137W                                          | RGP1          | YDR289C                 | RTT103        |
| YMR095C                                          | SNO1          | YMR096W                 | SNZ1          |
| YMR179W                                          | SPT21         | YOL091W                 | SPO21         |
| YGL237C                                          | HAP2          | YJL183W                 | MNN11         |
| YML095C                                          | RAD10         | YGL003C                 | CDH1          |
| YDR383C                                          | NKP1          | YML016C                 | PPZ1          |
| YML001W                                          | YPT7          | YDL083C                 | RPS16B        |
| YEL043W                                          | YEL043W       | YJR060W                 | CBF1          |
| YDR318W                                          | MCM21         | YLR032W                 | RAD5          |
| YIL053W                                          | RHR2          | YBR171W                 | SEC66         |
| YMR142C                                          | RPL13B        | YOR290C                 | SNF2          |
| YEL065W                                          | SIT1          | YDR310C                 | SUM1          |
| YLR018C                                          | POM34         | YGL163C                 | RAD54         |
| YML109W                                          | ZDS2          | YBR009C                 | HHF1          |
| YDR484W                                          | VPS52         | YER040W                 | GLN3          |
| YPR046W                                          | MCM16         | YDR289C                 | RTT103        |
| YMR095C                                          | SNO1          | YPR036W                 | VMA13         |
| YFR010W                                          | UBP6          | YHR167W                 | THP2          |
| YKL116C                                          | PRR1          | YMR214W                 | SCJ1          |
| YHR039C-A                                        | VMA10         | YDL077C                 | VAM6          |
| YFR031C-A                                        | RPL2A         | YJL036W                 | SNX4          |
| YDR440W                                          | DOT1          | YJL095W                 | BCK1          |
| YMR095C                                          | SNO1          | YER162C                 | RAD4          |
| YML115C                                          | VAN1          | YJL183W                 | MNN11         |
| YOR332W                                          | VMA4          | YGR020C                 | VMA7          |
| YPR046W                                          | MCM16         | YBL025W                 | RRN10         |
| YJR060W                                          | CBF1          | YDR153C                 | ENT5          |
| YKL025C                                          | PAN3          | YDR289C                 | RTT103        |
| YML115C                                          | VAN1          | YBR274W                 | CHK1          |



| Predictions at threshold level 0.80 continued... |               |                         |               |
|--------------------------------------------------|---------------|-------------------------|---------------|
| Gene1 of predicted pair                          |               | Gene2 of predicted pair |               |
| Systematic Name                                  | Standard Name | Systematic Name         | Standard Name |
| YPR029C                                          | APL4          | YOR035C                 | SHE4          |
| YIL053W                                          | RHR2          | YOL111C                 | MDY2          |
| YMR224C                                          | MRE11         | YDR335W                 | MSN5          |
| YDL101C                                          | DUN1          | YMR038C                 | CCS1          |
| YGR020C                                          | VMA7          | YJL183W                 | MNN11         |
| YOR138C                                          | RUP1          | YOR124C                 | UBP2          |
| YLR058C                                          | SHM2          | YBR215W                 | HPC2          |
| YGR270W                                          | YTA7          | YDR318W                 | MCM21         |
| YDR225W                                          | HTA1          | YBR173C                 | UMP1          |
| YAL024C                                          | LTE1          | YOL121C                 | RPS19A        |
| YLR079W                                          | SIC1          | YOR106W                 | VAM3          |
| YER161C                                          | SPT2          | YKL213C                 | DOA1          |
| YMR142C                                          | RPL13B        | YDL223C                 | HBT1          |
| YER116C                                          | SLX8          | YJR032W                 | CPR7          |
| YDR484W                                          | VPS52         | YBR127C                 | VMA2          |
| YKL048C                                          | ELM1          | YKL110C                 | KTI12         |
| YNL106C                                          | INP52         | YGL124C                 | MON1          |
| YNR023W                                          | SNF12         | YBR289W                 | SNF5          |
| YHR111W                                          | UBA4          | YJL095W                 | BCK1          |
| YMR095C                                          | SNO1          | YML001W                 | YPT7          |
| YOR033C                                          | EXO1          | YDL101C                 | DUN1          |
| YBR065C                                          | ECM2          | YIR009W                 | MSL1          |
| YBL051C                                          | PIN4          | YLR425W                 | TUS1          |
| YOR368W                                          | RAD17         | YDR310C                 | SUM1          |
| YIL076W                                          | SEC28         | YPL195W                 | APL5          |
| YFR031C-A                                        | RPL2A         | YLR309C                 | IMH1          |
| YMR199W                                          | CLN1          | YDR456W                 | NHX1          |
| YLR386W                                          | VAC14         | YEL053C                 | MAK10         |
| YEL065W                                          | SIT1          | YKL160W                 | ELF1          |

| Predictions at threshold level 0.80 continued... |               |                         |               |
|--------------------------------------------------|---------------|-------------------------|---------------|
| Gene1 of predicted pair                          |               | Gene2 of predicted pair |               |
| Systematic Name                                  | Standard Name | Systematic Name         | Standard Name |
| YKR072C                                          | SIS2          | YBR215W                 | HPC2          |
| YPR052C                                          | NHP6A         | YDR176W                 | NGG1          |
| YFR031C-A                                        | RPL2A         | YDR293C                 | SSD1          |
| YBL016W                                          | FUS3          | YDL159W                 | STE7          |
| YBR108W                                          | YBR108W       | YAL002W                 | VPS8          |
| YCR020C-A                                        | MAK31         | YDR153C                 | ENT5          |
| YML095C                                          | RAD10         | YGL253W                 | HXK2          |
| YLR216C                                          | CPR6          | YGR188C                 | BUB1          |
| YKR101W                                          | SIR1          | YCL027W                 | FUS1          |
| YKL139W                                          | CTK1          | YML071C                 | COG8          |
| YMR026C                                          | PEX12         | YPR036W                 | VMA13         |
| YBL047C                                          | EDE1          | YML097C                 | VPS9          |
| YNL206C                                          | RTT106        | YPL256C                 | CLN2          |
| YLR234W                                          | TOP3          | YBR274W                 | CHK1          |
| YKL139W                                          | CTK1          | YDR335W                 | MSN5          |
| YIL053W                                          | RHR2          | YKL116C                 | PRR1          |
| YBR171W                                          | SEC66         | YHR060W                 | VMA22         |
| YHR134W                                          | WSS1          | YLR313C                 | SPH1          |
| YDL116W                                          | NUP84         | YDR004W                 | RAD57         |
| YLR176C                                          | RFX1          | YCR084C                 | TUP1          |
| YGL133W                                          | ITC1          | YKL032C                 | IXR1          |
| YDR103W                                          | STE5          | YBR200W                 | BEM1          |
| YIL076W                                          | SEC28         | YNL051W                 | COG5          |
| YFR031C-A                                        | RPL2A         | YGL025C                 | PGD1          |
| YJR060W                                          | CBF1          | YDL155W                 | CLB3          |
| YDR174W                                          | HMO1          | YDL013W                 | SLX5          |
| YNL032W                                          | SIW14         | YBR280C                 | SAF1          |
| YDR129C                                          | SAC6          | YDL223C                 | HBT1          |
| YLR102C                                          | APC9          | YOR127W                 | RGA1          |

| Predictions at threshold level 0.80 continued... |               |                         |               |
|--------------------------------------------------|---------------|-------------------------|---------------|
| Gene1 of predicted pair                          |               | Gene2 of predicted pair |               |
| Systematic Name                                  | Standard Name | Systematic Name         | Standard Name |
| YKL116C                                          | PRR1          | YOR270C                 | VPH1          |
| YGR261C                                          | APL6          | YPL234C                 | TFP3          |
| YDR192C                                          | NUP42         | YLR234W                 | TOP3          |
| YGL087C                                          | MMS2          | YOR358W                 | HAP5          |
| YOR195W                                          | SLK19         | YDL155W                 | CLB3          |
| YNL215W                                          | IES2          | YEL013W                 | VAC8          |
| YIL159W                                          | BNR1          | YKR035W-A               | DID2          |
| YKL139W                                          | CTK1          | YKR020W                 | VPS51         |
| YDR383C                                          | NKP1          | YLR399C                 | BDF1          |
| YBL103C                                          | RTG3          | YMR230W                 | RPS10B        |
| YGL147C                                          | RPL9A         | YKL139W                 | CTK1          |
| YBR194W                                          | SOY1          | YLR182W                 | SWI6          |
| YLR090W                                          | XDJ1          | YDR207C                 | UME6          |
| YBL088C                                          | TEL1          | YER068W                 | MOT2          |
| YMR095C                                          | SNO1          | YMR224C                 | MRE11         |
| YPR018W                                          | RLF2          | YKR072C                 | SIS2          |
| YJL172W                                          | CPS1          | YDR207C                 | UME6          |
| YDR264C                                          | AKR1          | YGR135W                 | PRE9          |
| YOR033C                                          | EXO1          | YDL059C                 | RAD59         |
| YDR254W                                          | CHL4          | YNL116W                 | DMA2          |
| YNL087W                                          | TCB2          | YGL212W                 | VAM7          |
| YMR026C                                          | PEX12         | YDL077C                 | VAM6          |
| YLR452C                                          | SST2          | YDL047W                 | SIT4          |
| YPL105C                                          | YPL105C       | YER120W                 | SCS2          |
| YDR144C                                          | MKC7          | YCR086W                 | CSM1          |
| YOR337W                                          | TEA1          | YIL076W                 | SEC28         |
| YFR010W                                          | UBP6          | YHR081W                 | LRP1          |
| YBL102W                                          | SFT2          | YOR132W                 | VPS17         |
| YPR084W                                          | YPR084W       | YOR109W                 | INP53         |

| Predictions at threshold level 0.80 continued... |               |                         |               |
|--------------------------------------------------|---------------|-------------------------|---------------|
| Gene1 of predicted pair                          |               | Gene2 of predicted pair |               |
| Systematic Name                                  | Standard Name | Systematic Name         | Standard Name |
| YIL159W                                          | BNR1          | YNL116W                 | DMA2          |
| YNR072W                                          | HXT17         | YEL060C                 | PRB1          |
| YJL172W                                          | CPS1          | YOR043W                 | WHI2          |
| YPR119W                                          | CLB2          | YDR131C                 | YDR131C       |
| YLR095C                                          | IOC2          | YLR398C                 | SKI2          |
| YDR137W                                          | RGP1          | YDR358W                 | GGA1          |
| YHR152W                                          | SPO12         | YKL101W                 | HSL1          |
| YBR200W                                          | BEM1          | YMR055C                 | BUB2          |
| YJL124C                                          | LSM1          | YKL032C                 | IXR1          |
| YFR031C-A                                        | RPL2A         | YDR310C                 | SUM1          |
| YCR020C-A                                        | MAK31         | YNR032W                 | PPG1          |
| YLR135W                                          | SLX4          | YJR035W                 | RAD26         |
| YAL024C                                          | LTE1          | YER122C                 | GLO3          |
| YPR018W                                          | RLF2          | YOR368W                 | RAD17         |
| YOR059C                                          | YOR059C       | YMR152W                 | YIM1          |
| YHR060W                                          | VMA22         | YJR032W                 | CPR7          |
| YNL291C                                          | MID1          | YCL001W                 | RER1          |
| YJR060W                                          | CBF1          | YNL041C                 | COG6          |
| YJL154C                                          | VPS35         | YNR032W                 | PPG1          |
| YGR020C                                          | VMA7          | YKR020W                 | VPS51         |
| YGL115W                                          | SNF4          | YDR207C                 | UME6          |
| YBR200W                                          | BEM1          | YER144C                 | UBP5          |
| YPR046W                                          | MCM16         | YLR182W                 | SWI6          |
| YNL307C                                          | MCK1          | YLR093C                 | NYV1          |
| YDR378C                                          | LSM6          | YOR141C                 | ARP8          |
| YDR443C                                          | SSN2          | YBL103C                 | RTG3          |
| YHR195W                                          | NVJ1          | YPR185W                 | ATG13         |
| YNL264C                                          | PDR17         | YDL005C                 | MED2          |
| YPL253C                                          | VIK1          | YMR311C                 | GLC8          |

| Predictions at threshold level 0.80 continued... |               |                         |               |
|--------------------------------------------------|---------------|-------------------------|---------------|
| Gene1 of predicted pair                          |               | Gene2 of predicted pair |               |
| Systematic Name                                  | Standard Name | Systematic Name         | Standard Name |
| YBR108W                                          | YBR108W       | YHR060W                 | VMA22         |
| YNL215W                                          | IES2          | YMR038C                 | CCS1          |
| YLR079W                                          | SIC1          | YDR207C                 | UME6          |
| YML016C                                          | PPZ1          | YNL248C                 | RPA49         |
| YEL050C                                          | RML2          | YNL236W                 | SIN4          |
| YOR212W                                          | STE4          | YJL157C                 | FAR1          |
| YBR194W                                          | SOY1          | YCL037C                 | SRO9          |
| YGR019W                                          | UGA1          | YDR144C                 | MKC7          |
| YDR293C                                          | SSD1          | YOR112W                 | CEX1          |
| YLR386W                                          | VAC14         | YHR200W                 | RPN10         |
| YHR012W                                          | VPS29         | YGR105W                 | VMA21         |
| YLR398C                                          | SKI2          | YER122C                 | GLO3          |
| YJL136C                                          | RPS21B        | YKL101W                 | HSL1          |
| YEL053C                                          | MAK10         | YML001W                 | YPT7          |
| YKL110C                                          | KTI12         | YNL107W                 | YAF9          |
| YBR200W                                          | BEM1          | YKR057W                 | RPS21A        |
| YKL139W                                          | CTK1          | YGR270W                 | YTA7          |
| YLR360W                                          | VPS38         | YLR447C                 | VMA6          |
| YDL006W                                          | PTC1          | YGL019W                 | CKB1          |
| YMR205C                                          | PFK2          | YHR200W                 | RPN10         |
| YPR173C                                          | VPS4          | YGL124C                 | MON1          |
| YMR198W                                          | CIK1          | YDR289C                 | RTT103        |
| YNL209W                                          | SSB2          | YDR028C                 | REG1          |
| YMR153W                                          | NUP53         | YMR214W                 | SCJ1          |
| YDR176W                                          | NGG1          | YDR216W                 | ADR1          |
| YGL223C                                          | COG1          | YHR039C-A               | VMA10         |
| YPL037C                                          | EGD1          | YGL115W                 | SNF4          |
| YGR249W                                          | MGA1          | YDR484W                 | VPS52         |
| YLR090W                                          | XDJ1          | YDL077C                 | VAM6          |

| Predictions at threshold level 0.80 continued... |               |                         |               |
|--------------------------------------------------|---------------|-------------------------|---------------|
| Gene1 of predicted pair                          |               | Gene2 of predicted pair |               |
| Systematic Name                                  | Standard Name | Systematic Name         | Standard Name |
| YAL024C                                          | LTE1          | YJR032W                 | CPR7          |
| YFR036W                                          | CDC26         | YEL036C                 | ANP1          |
| YLR337C                                          | VRP1          | YKL041W                 | VPS24         |
| YHR060W                                          | VMA22         | YDR310C                 | SUM1          |
| YAL024C                                          | LTE1          | YGR238C                 | KEL2          |
| YEL060C                                          | PRB1          | YOL081W                 | IRA2          |
| YBL079W                                          | NUP170        | YCR086W                 | CSM1          |
| YKL135C                                          | APL2          | YOR109W                 | INP53         |
| YNL206C                                          | RTT106        | YBL087C                 | RPL23A        |
| YDR171W                                          | HSP42         | YNL107W                 | YAF9          |
| YMR091C                                          | NPL6          | YCR020W-B               | HTL1          |
| YBL102W                                          | SFT2          | YJR033C                 | RAV1          |
| YER116C                                          | SLX8          | YDL077C                 | VAM6          |
| YGL147C                                          | RPL9A         | YER144C                 | UBP5          |
| YKL007W                                          | CAP1          | YDR245W                 | MNN10         |
| YML103C                                          | NUP188        | YKR061W                 | KTR2          |
| YDL184C                                          | RPL41A        | YOR066W                 | MSA1          |
| YEL056W                                          | HAT2          | YBR114W                 | RAD16         |
| YJR135C                                          | MCM22         | YOL081W                 | IRA2          |
| YGL147C                                          | RPL9A         | YLR441C                 | RPS1A         |
| YPL234C                                          | TFP3          | YHR012W                 | VPS29         |
| YBR108W                                          | YBR108W       | YGL003C                 | CDH1          |
| YIL034C                                          | CAP2          | YGR080W                 | TWF1          |
| YFR032C-A                                        | RPL29         | YBR200W                 | BEM1          |
| YBL051C                                          | PIN4          | YDR318W                 | MCM21         |
| YJL197W                                          | UBP12         | YFL026W                 | STE2          |
| YGR241C                                          | YAP1802       | YJL053W                 | PEP8          |
| YLR192C                                          | HCR1          | YKR099W                 | BAS1          |
| YDL116W                                          | NUP84         | YJR024C                 | MDE1          |

| Predictions at threshold level 0.80 continued... |               |                         |               |
|--------------------------------------------------|---------------|-------------------------|---------------|
| Gene1 of predicted pair                          |               | Gene2 of predicted pair |               |
| Systematic Name                                  | Standard Name | Systematic Name         | Standard Name |
| YDR254W                                          | CHL4          | YDR155C                 | CPR1          |
| YJR063W                                          | RPA12         | YGL163C                 | RAD54         |
| YER129W                                          | SAK1          | YJL187C                 | SWE1          |
| YLR079W                                          | SIC1          | YLR429W                 | CRN1          |
| YOL051W                                          | GAL11         | YKR048C                 | NAP1          |
| YGL163C                                          | RAD54         | YLR032W                 | RAD5          |
| YNL201C                                          | PSY2          | YLR182W                 | SWI6          |
| YGL174W                                          | BUD13         | YJR135C                 | MCM22         |
| YBL058W                                          | SHP1          | YMR230W                 | RPS10B        |
| YMR172W                                          | HOT1          | YEL056W                 | HAT2          |
| YLR313C                                          | SPH1          | YDR207C                 | UME6          |
| YBR194W                                          | SOY1          | YGL200C                 | EMP24         |
| YMR055C                                          | BUB2          | YNL236W                 | SIN4          |
| YGL134W                                          | PCL10         | YPL031C                 | PHO85         |
| YJR032W                                          | CPR7          | YGL124C                 | MON1          |
| YNL032W                                          | SIW14         | YJL095W                 | BCK1          |
| YGR229C                                          | SMI1          | YHR205W                 | SCH9          |
| YNL264C                                          | PDR17         | YBL078C                 | ATG8          |
| YNL106C                                          | INP52         | YKR061W                 | KTR2          |
| YBL008W                                          | HIR1          | YLR435W                 | TSR2          |
| YOR023C                                          | AHC1          | YGR270W                 | YTA7          |
| YPR084W                                          | YPR084W       | YNL127W                 | FAR11         |
| YDR176W                                          | NGG1          | YGL025C                 | PGD1          |
| YKL160W                                          | ELF1          | YEL013W                 | VAC8          |
| YOR290C                                          | SNF2          | YMR038C                 | CCS1          |
| YEL053C                                          | MAK10         | YHL002W                 | HSE1          |
| YBR173C                                          | UMP1          | YML001W                 | YPT7          |
| YPL152W                                          | RRD2          | YGR188C                 | BUB1          |
| YEL053C                                          | MAK10         | YBL025W                 | RRN10         |

| Predictions at threshold level 0.80 continued... |               |                         |               |
|--------------------------------------------------|---------------|-------------------------|---------------|
| Gene1 of predicted pair                          |               | Gene2 of predicted pair |               |
| Systematic Name                                  | Standard Name | Systematic Name         | Standard Name |
| YLR399C                                          | BDF1          | YGL252C                 | RTG2          |
| YBL008W                                          | HIR1          | YPR119W                 | CLB2          |
| YNL054W                                          | VAC7          | YLR399C                 | BDF1          |
| YCL067C                                          | HMLALPHA2     | YNL330C                 | RPD3          |
| YGR020C                                          | VMA7          | YNL041C                 | COG6          |
| YEL051W                                          | VMA8          | YDR207C                 | UME6          |
| YIL036W                                          | CST6          | YML016C                 | PPZ1          |
| YOR039W                                          | CKB2          | YBR274W                 | CHK1          |
| YPL253C                                          | VIK1          | YFR036W                 | CDC26         |
| YOR008C                                          | SLG1          | YNL199C                 | GCR2          |
| YOR080W                                          | DIA2          | YER161C                 | SPT2          |
| YPL234C                                          | TFP3          | YJR032W                 | CPR7          |
| YPR018W                                          | RLF2          | YNL206C                 | RTT106        |
| YBR108W                                          | YBR108W       | YGL025C                 | PGD1          |
| YPR052C                                          | NHP6A         | YJR140C                 | HIR3          |
| YDR183W                                          | PLP1          | YEL056W                 | HAT2          |
| YGL151W                                          | NUT1          | YJL190C                 | RPS22A        |
| YOR035C                                          | SHE4          | YDL226C                 | GCS1          |
| YDR310C                                          | SUM1          | YMR214W                 | SCJ1          |
| YKL116C                                          | PRR1          | YPL195W                 | APL5          |
| YGR261C                                          | APL6          | YJR060W                 | CBF1          |
| YMR054W                                          | STV1          | YLR309C                 | IMH1          |
| YLR288C                                          | MEC3          | YLR352W                 | YLR352W       |
| YHR013C                                          | ARD1          | YNL225C                 | CNM67         |
| YDR080W                                          | VPS41         | YHL020C                 | OPI1          |
| YDR176W                                          | NGG1          | YPR072W                 | NOT5          |
| YGL078C                                          | DBP3          | YHR081W                 | LRP1          |
| YGL212W                                          | VAM7          | YDR358W                 | GGA1          |
| YDR156W                                          | RPA14         | YBR041W                 | FAT1          |



| Predictions at threshold level 0.80 continued... |               |                         |               |
|--------------------------------------------------|---------------|-------------------------|---------------|
| Gene1 of predicted pair                          |               | Gene2 of predicted pair |               |
| Systematic Name                                  | Standard Name | Systematic Name         | Standard Name |
| YDR137W                                          | RGP1          | YLR320W                 | MMS22         |
| YER087C-B                                        | SBH1          | YDL074C                 | BRE1          |
| YER110C                                          | KAP123        | YNL030W                 | HHF2          |
| YGR261C                                          | APL6          | YPL161C                 | BEM4          |
| YNL230C                                          | ELA1          | YOR028C                 | CIN5          |
| YFR010W                                          | UBP6          | YDR260C                 | SWM1          |
| YGR070W                                          | ROM1          | YJL095W                 | BCK1          |
| YOR337W                                          | TEA1          | YBL058W                 | SHP1          |
| YML071C                                          | COG8          | YJR033C                 | RAV1          |
| YLR119W                                          | SRN2          | YPR173C                 | VPS4          |
| YOR080W                                          | DIA2          | YMR055C                 | BUB2          |
| YPL115C                                          | BEM3          | YML109W                 | ZDS2          |
| YGL147C                                          | RPL9A         | YMR026C                 | PEX12         |
| YJL172W                                          | CPS1          | YLR371W                 | ROM2          |
| YPR051W                                          | MAK3          | YEL051W                 | VMA8          |
| YBL008W                                          | HIR1          | YDL155W                 | CLB3          |
| YNR072W                                          | HXT17         | YML001W                 | YPT7          |
| YML016C                                          | PPZ1          | YLR452C                 | SST2          |
| YDR443C                                          | SSN2          | YHR060W                 | VMA22         |
| YJR060W                                          | CBF1          | YKR030W                 | GMH1          |
| YHL020C                                          | OPI1          | YAR014C                 | BUD14         |
| YBL103C                                          | RTG3          | YLR441C                 | RPS1A         |
| YHR156C                                          | LIN1          | YDR477W                 | SNF1          |
| YOR337W                                          | TEA1          | YDL077C                 | VAM6          |
| YMR142C                                          | RPL13B        | YCR053W                 | THR4          |
| YOR195W                                          | SLK19         | YLR150W                 | STM1          |
| YKL160W                                          | ELF1          | YDR440W                 | DOT1          |
| YDL083C                                          | RPS16B        | YBL025W                 | RRN10         |
| YNL044W                                          | YIP3          | YKR001C                 | VPS1          |

| Predictions at threshold level 0.80 continued... |               |                         |               |
|--------------------------------------------------|---------------|-------------------------|---------------|
| Gene1 of predicted pair                          |               | Gene2 of predicted pair |               |
| Systematic Name                                  | Standard Name | Systematic Name         | Standard Name |
| YKL048C                                          | ELM1          | YER068W                 | MOT2          |
| YDR383C                                          | NKP1          | YML112W                 | CTK3          |
| YGL147C                                          | RPL9A         | YKR035W-A               | DID2          |
| YML016C                                          | PPZ1          | YPR046W                 | MCM16         |
| YMR109W                                          | MYO5          | YJR032W                 | CPR7          |
| YHR012W                                          | VPS29         | YDL192W                 | ARF1          |
| YGL212W                                          | VAM7          | YOL081W                 | IRA2          |
| YPR030W                                          | CSR2          | YMR214W                 | SCJ1          |
| YPR052C                                          | NHP6A         | YOL145C                 | CTR9          |
| YMR205C                                          | PFK2          | YKL048C                 | ELM1          |
| YGL003C                                          | CDH1          | YDL077C                 | VAM6          |
| YER114C                                          | BOI2          | YLR362W                 | STE11         |
| YLR371W                                          | ROM2          | YOR035C                 | SHE4          |
| YOR043W                                          | WHI2          | YER162C                 | RAD4          |
| YOR033C                                          | EXO1          | YNL291C                 | MID1          |
| YER143W                                          | DDI1          | YAL030W                 | SNC1          |
| YNL307C                                          | MCK1          | YDR076W                 | RAD55         |
| YDL223C                                          | HBT1          | YKR020W                 | VPS51         |
| YNL215W                                          | IES2          | YLR381W                 | CTF3          |
| YJL095W                                          | BCK1          | YOR141C                 | ARP8          |
| YDL116W                                          | NUP84         | YKL068W                 | NUP100        |
| YGL054C                                          | ERV14         | YPL195W                 | APL5          |
| YLR090W                                          | XDJ1          | YEL065W                 | SIT1          |
| YGL212W                                          | VAM7          | YOR035C                 | SHE4          |
| YDR448W                                          | ADA2          | YNL236W                 | SIN4          |
| YPR051W                                          | MAK3          | YOR327C                 | SNC2          |
| YBR200W                                          | BEM1          | YLR182W                 | SWI6          |
| YMR172W                                          | HOT1          | YDR289C                 | RTT103        |
| YBL058W                                          | SHP1          | YMR214W                 | SCJ1          |

| Predictions at threshold level 0.80 continued... |               |                         |               |
|--------------------------------------------------|---------------|-------------------------|---------------|
| Gene1 of predicted pair                          |               | Gene2 of predicted pair |               |
| Systematic Name                                  | Standard Name | Systematic Name         | Standard Name |
| YER044C                                          | ERG28         | YDR207C                 | UME6          |
| YKL139W                                          | CTK1          | YBR108W                 | YBR108W       |
| YAL024C                                          | LTE1          | YLR370C                 | ARC18         |
| YNL248C                                          | RPA49         | YLR315W                 | NKP2          |
| YPL024W                                          | RMI1          | YGL212W                 | VAM7          |
| YLR360W                                          | VPS38         | YLR386W                 | VAC14         |
| YBR171W                                          | SEC66         | YOR275C                 | RIM20         |
| YBL008W                                          | HIR1          | YLR381W                 | CTF3          |
| YMR016C                                          | SOK2          | YOR035C                 | SHE4          |
| YOR312C                                          | RPL20B        | YJL095W                 | BCK1          |
| YOR270C                                          | VPH1          | YDL083C                 | RPS16B        |
| YBR107C                                          | IML3          | YJR035W                 | RAD26         |
| YBR173C                                          | UMP1          | YNR072W                 | HXT17         |
| YGL033W                                          | HOP2          | YMR142C                 | RPL13B        |
| YGR188C                                          | BUB1          | YLR182W                 | SWI6          |
| YHR098C                                          | SFB3          | YLR085C                 | ARP6          |
| YDL059C                                          | RAD59         | YKL068W                 | NUP100        |
| YBL025W                                          | RRN10         | YMR214W                 | SCJ1          |
| YGR071C                                          | YGR071C       | YOR308C                 | SNU66         |
| YDL185W                                          | TFP1          | YHR039C-A               | VMA10         |
| YOR066W                                          | MSA1          | YLR180W                 | SAM1          |
| YNL106C                                          | INP52         | YBR107C                 | IML3          |
| YGL078C                                          | DBP3          | YHR156C                 | LIN1          |
| YBL008W                                          | HIR1          | YDR289C                 | RTT103        |
| YGR072W                                          | UPF3          | YKR020W                 | VPS51         |
| YLR079W                                          | SIC1          | YNL236W                 | SIN4          |
| YGR020C                                          | VMA7          | YCR066W                 | RAD18         |
| YBR173C                                          | UMP1          | YKL114C                 | APN1          |
| YGL151W                                          | NUT1          | YJL095W                 | BCK1          |

| Predictions at threshold level 0.80 continued... |               |                         |               |
|--------------------------------------------------|---------------|-------------------------|---------------|
| Gene1 of predicted pair                          |               | Gene2 of predicted pair |               |
| Systematic Name                                  | Standard Name | Systematic Name         | Standard Name |
| YGL163C                                          | RAD54         | YML028W                 | TSA1          |
| YLR094C                                          | GIS3          | YLR180W                 | SAM1          |
| YLR447C                                          | VMA6          | YDL185W                 | TFP1          |
| YDR443C                                          | SSN2          | YBR200W                 | BEM1          |
| YNL032W                                          | SIW14         | YOR035C                 | SHE4          |
| YKR061W                                          | KTR2          | YAL010C                 | MDM10         |
| YLR094C                                          | GIS3          | YEL060C                 | PRB1          |
| YDR443C                                          | SSN2          | YOL121C                 | RPS19A        |
| YHR205W                                          | SCH9          | YDL074C                 | BRE1          |
| YOR035C                                          | SHE4          | YEL036C                 | ANP1          |
| YKL101W                                          | HSL1          | YML028W                 | TSA1          |
| YBR194W                                          | SOY1          | YOR195W                 | SLK19         |
| YKL006W                                          | RPL14A        | YLR370C                 | ARC18         |
| YDR260C                                          | SWM1          | YAR014C                 | BUD14         |
| YFR010W                                          | UBP6          | YDL013W                 | SLX5          |
| YLR234W                                          | TOP3          | YMR284W                 | YKU70         |
| YDR422C                                          | SIP1          | YJL187C                 | SWE1          |
| YLR399C                                          | BDF1          | YNL030W                 | HHF2          |
| YLR095C                                          | IOC2          | YPR046W                 | MCM16         |
| YOR127W                                          | RGA1          | YGR188C                 | BUB1          |
| YJL095W                                          | BCK1          | YHL002W                 | HSE1          |
| YPL161C                                          | BEM4          | YBR019C                 | GAL10         |
| YGL178W                                          | MPT5          | YLR085C                 | ARP6          |
| YLR192C                                          | HCR1          | YJR084W                 | CSN12         |
| YDR363W-A                                        | SEM1          | YGR135W                 | PRE9          |
| YPR030W                                          | CSR2          | YLR180W                 | SAM1          |
| YNL307C                                          | MCK1          | YHR013C                 | ARD1          |
| YBR009C                                          | HHF1          | YDR227W                 | SIR4          |
| YHR200W                                          | RPN10         | YDR076W                 | RAD55         |

| Predictions at threshold level 0.80 continued... |               |                         |               |
|--------------------------------------------------|---------------|-------------------------|---------------|
| Gene1 of predicted pair                          |               | Gene2 of predicted pair |               |
| Systematic Name                                  | Standard Name | Systematic Name         | Standard Name |
| YIL053W                                          | RHR2          | YMR311C                 | GLC8          |
| YBR127C                                          | VMA2          | YDL161W                 | ENT1          |
| YJR032W                                          | CPR7          | YER122C                 | GLO3          |
| YOR195W                                          | SLK19         | YBR084C-A               | RPL19A        |
| YPR084W                                          | YPR084W       | YDR202C                 | RAV2          |
| YCR053W                                          | THR4          | YER122C                 | GLO3          |
| YKL139W                                          | CTK1          | YKR061W                 | KTR2          |
| YGL078C                                          | DBP3          | YPR030W                 | CSR2          |
| YLR288C                                          | MEC3          | YCR086W                 | CSM1          |
| YFR010W                                          | UBP6          | YGR071C                 | YGR071C       |
| YNL079C                                          | TPM1          | YKL161C                 | YKL161C       |
| YPL042C                                          | SSN3          | YGL025C                 | PGD1          |
| YAL024C                                          | LTE1          | YOL054W                 | PSH1          |
| YGL054C                                          | ERV14         | YNL238W                 | KEX2          |
| YBR126C                                          | TPS1          | YCR088W                 | ABP1          |
| YJR033C                                          | RAV1          | YKR030W                 | GMH1          |
| YLR234W                                          | TOP3          | YCR031C                 | RPS14A        |
| YDL160C                                          | DHH1          | YPR163C                 | TIF3          |
| YMR026C                                          | PEX12         | YGL153W                 | PEX14         |
| YKR057W                                          | RPS21A        | YGR135W                 | PRE9          |
| YBL058W                                          | SHP1          | YOR270C                 | VPH1          |
| YLR095C                                          | IOC2          | YBR030W                 | YBR030W       |
| YDR245W                                          | MNN10         | YBR082C                 | UBC4          |
| YDR137W                                          | RGP1          | YKR020W                 | VPS51         |
| YKL139W                                          | CTK1          | YEL053C                 | MAK10         |
| YNL032W                                          | SIW14         | YBL025W                 | RRN10         |
| YLR320W                                          | MMS22         | YMR214W                 | SCJ1          |
| YDR443C                                          | SSN2          | YGL212W                 | VAM7          |
| YGR275W                                          | RTT102        | YNR023W                 | SNF12         |

| Predictions at threshold level 0.80 continued... |               |                         |               |
|--------------------------------------------------|---------------|-------------------------|---------------|
| Gene1 of predicted pair                          |               | Gene2 of predicted pair |               |
| Systematic Name                                  | Standard Name | Systematic Name         | Standard Name |
| YDL101C                                          | DUN1          | YDR477W                 | SNF1          |
| YGR270W                                          | YTA7          | YBR114W                 | RAD16         |
| YBR200W                                          | BEM1          | YPL137C                 | GIP3          |
| YLR018C                                          | POM34         | YPL256C                 | CLN2          |
| YMR026C                                          | PEX12         | YEL060C                 | PRB1          |
| YPL024W                                          | RMI1          | YNL215W                 | IES2          |
| YDL184C                                          | RPL41A        | YLR180W                 | SAM1          |
| YPL024W                                          | RMI1          | YER162C                 | RAD4          |
| YPR120C                                          | CLB5          | YHR115C                 | DMA1          |
| YER059W                                          | PCL6          | YIL050W                 | PCL7          |
| YJL151C                                          | SNA3          | YHR016C                 | YSC84         |
| YIL008W                                          | URM1          | YGL031C                 | RPL24A        |
| YGL237C                                          | HAP2          | YIL008W                 | URM1          |
| YBL103C                                          | RTG3          | YMR311C                 | GLC8          |
| YMR202W                                          | ERG2          | YPR173C                 | VPS4          |
| YMR116C                                          | ASC1          | YJL095W                 | BCK1          |
| YMR273C                                          | ZDS1          | YNL199C                 | GCR2          |
| YEL043W                                          | YEL043W       | YGR089W                 | NNF2          |
| YBR260C                                          | RGD1          | YLR371W                 | ROM2          |
| YOR106W                                          | VAM3          | YDR155C                 | CPR1          |
| YLR234W                                          | TOP3          | YPL001W                 | HAT1          |
| YBR289W                                          | SNF5          | YOR064C                 | YNG1          |
| YPL115C                                          | BEM3          | YGR270W                 | YTA7          |
| YIL007C                                          | NAS2          | YPL161C                 | BEM4          |
| YKL126W                                          | YPK1          | YPL195W                 | APL5          |
| YGL147C                                          | RPL9A         | YFL023W                 | BUD27         |
| YDR156W                                          | RPA14         | YOL054W                 | PSH1          |
| YFR030W                                          | MET10         | YFR036W                 | CDC26         |
| YKL116C                                          | PRR1          | YNR072W                 | HXT17         |

| Predictions at threshold level 0.80 continued... |               |                         |               |
|--------------------------------------------------|---------------|-------------------------|---------------|
| Gene1 of predicted pair                          |               | Gene2 of predicted pair |               |
| Systematic Name                                  | Standard Name | Systematic Name         | Standard Name |
| YGR261C                                          | APL6          | YOR109W                 | INP53         |
| YJL187C                                          | SWE1          | YNL116W                 | DMA2          |
| YLR362W                                          | STE11         | YBL016W                 | FUS3          |
| YMR038C                                          | CCS1          | YGR188C                 | BUB1          |
| YDR320C                                          | SWA2          | YHR060W                 | VMA22         |
| YLR350W                                          | ORM2          | YAL002W                 | VPS8          |
| YFR010W                                          | UBP6          | YLR441C                 | RPS1A         |
| YGR249W                                          | MGA1          | YDL184C                 | RPL41A        |
| YGL223C                                          | COG1          | YGL115W                 | SNF4          |
| YHR111W                                          | UBA4          | YNL225C                 | CNM67         |
| YPR036W                                          | VMA13         | YPR046W                 | MCM16         |
| YLR386W                                          | VAC14         | YPL037C                 | EGD1          |
| YDR261C                                          | EXG2          | YPR046W                 | MCM16         |
| YGR184C                                          | UBR1          | YDR318W                 | MCM21         |
| YPR173C                                          | VPS4          | YKL002W                 | DID4          |
| YDR383C                                          | NKP1          | YHR111W                 | UBA4          |
| YOR112W                                          | CEX1          | YPL195W                 | APL5          |
| YBR274W                                          | CHK1          | YDR289C                 | RTT103        |
| YJL058C                                          | BIT61         | YJR060W                 | CBF1          |
| YJL210W                                          | PEX2          | YOL044W                 | PEX15         |
| YLR381W                                          | CTF3          | YMR038C                 | CCS1          |
| YBR084C-A                                        | RPL19A        | YPL161C                 | BEM4          |
| YDR443C                                          | SSN2          | YNR072W                 | HXT17         |
| YER120W                                          | SCS2          | YGR105W                 | VMA21         |
| YER107C                                          | GLE2          | YER016W                 | BIM1          |
| YKL048C                                          | ELM1          | YFR036W                 | CDC26         |
| YOR337W                                          | TEA1          | YHR200W                 | RPN10         |
| YBL103C                                          | RTG3          | YGL212W                 | VAM7          |
| YGR249W                                          | MGA1          | YGL212W                 | VAM7          |

| Predictions at threshold level 0.80 continued... |               |                         |               |
|--------------------------------------------------|---------------|-------------------------|---------------|
| Gene1 of predicted pair                          |               | Gene2 of predicted pair |               |
| Systematic Name                                  | Standard Name | Systematic Name         | Standard Name |
| YBL079W                                          | NUP170        | YGL175C                 | SAE2          |
| YHR056C                                          | RSC30         | YDL047W                 | SIT4          |
| YEL043W                                          | YEL043W       | YNL041C                 | COG6          |
| YDL052C                                          | SLC1          | YKL094W                 | YJU3          |
| YOL111C                                          | MDY2          | YLR370C                 | ARC18         |
| YNL069C                                          | RPL16B        | YML071C                 | COG8          |
| YNL229C                                          | URE2          | YIL008W                 | URM1          |
| YGR014W                                          | MSB2          | YGL200C                 | EMP24         |
| YER118C                                          | SHO1          | YHL002W                 | HSE1          |
| YIL053W                                          | RHR2          | YNL307C                 | MCK1          |
| YHR200W                                          | RPN10         | YOR014W                 | RTS1          |
| YOR023C                                          | AHC1          | YER110C                 | KAP123        |
| YMR095C                                          | SNO1          | YFL023W                 | BUD27         |
| YDL223C                                          | HBT1          | YOR043W                 | WHI2          |
| YDL101C                                          | DUN1          | YKR072C                 | SIS2          |
| YMR133W                                          | REC114        | YOR035C                 | SHE4          |
| YLR396C                                          | VPS33         | YOR035C                 | SHE4          |
| YDR293C                                          | SSD1          | YEL051W                 | VMA8          |
| YLR360W                                          | VPS38         | YPL037C                 | EGD1          |
| YDR477W                                          | SNF1          | YER162C                 | RAD4          |
| YDR329C                                          | PEX3          | YOL044W                 | PEX15         |
| YAL024C                                          | LTE1          | YJR056C                 | YJR056C       |
| YNL116W                                          | DMA2          | YGR188C                 | BUB1          |
| YKL126W                                          | YPK1          | YMR230W                 | RPS10B        |
| YLR288C                                          | MEC3          | YGL163C                 | RAD54         |
| YLR386W                                          | VAC14         | YHR115C                 | DMA1          |
| YMR164C                                          | MSS11         | YNL199C                 | GCR2          |
| YJR060W                                          | CBF1          | YPL018W                 | CTF19         |
| YNL166C                                          | BNI5          | YDL155W                 | CLB3          |



| Predictions at threshold level 0.80 continued... |               |                         |               |
|--------------------------------------------------|---------------|-------------------------|---------------|
| Gene1 of predicted pair                          |               | Gene2 of predicted pair |               |
| Systematic Name                                  | Standard Name | Systematic Name         | Standard Name |
| YGL237C                                          | HAP2          | YEL056W                 | HAT2          |
| YDR329C                                          | PEX3          | YDR244W                 | PEX5          |
| YMR127C                                          | SAS2          | YER110C                 | KAP123        |
| YIL148W                                          | RPL40A        | YMR164C                 | MSS11         |
| YAL024C                                          | LTE1          | YLR398C                 | SKI2          |
| YMR216C                                          | SKY1          | YOL018C                 | TLG2          |
| YNL215W                                          | IES2          | YBR274W                 | CHK1          |
| YGR261C                                          | APL6          | YGR105W                 | VMA21         |
| YBR274W                                          | CHK1          | YER161C                 | SPT2          |
| YIL159W                                          | BNR1          | YOR327C                 | SNC2          |
| YBR194W                                          | SOY1          | YPL057C                 | SUR1          |
| YGR019W                                          | UGA1          | YGL253W                 | HXK2          |
| YNL238W                                          | KEX2          | YNR032W                 | PPG1          |
| YIL076W                                          | SEC28         | YKR001C                 | VPS1          |
| YJL124C                                          | LSM1          | YNL199C                 | GCR2          |
| YLR410W                                          | VIP1          | YKR048C                 | NAP1          |
| YGR040W                                          | KSS1          | YLR452C                 | SST2          |
| YMR153W                                          | NUP53         | YOL121C                 | RPS19A        |
| YFR031C-A                                        | RPL2A         | YGL115W                 | SNF4          |
| YGR020C                                          | VMA7          | YEL051W                 | VMA8          |
| YGL025C                                          | PGD1          | YER040W                 | GLN3          |
| YKL110C                                          | KTI12         | YHR115C                 | DMA1          |
| YBR057C                                          | MUM2          | YDR440W                 | DOT1          |
| YML103C                                          | NUP188        | YKR024C                 | DBP7          |
| YBL058W                                          | SHP1          | YNL238W                 | KEX2          |
| YLR240W                                          | VPS34         | YDL226C                 | GCS1          |
| YOR112W                                          | CEX1          | YOR327C                 | SNC2          |
| YKL006W                                          | RPL14A        | YGL153W                 | PEX14         |
| YBR194W                                          | SOY1          | YML097C                 | VPS9          |

| Predictions at threshold level 0.80 continued... |               |                         |               |
|--------------------------------------------------|---------------|-------------------------|---------------|
| Gene1 of predicted pair                          |               | Gene2 of predicted pair |               |
| Systematic Name                                  | Standard Name | Systematic Name         | Standard Name |
| YGL237C                                          | HAP2          | YDR254W                 | CHL4          |
| YOR191W                                          | RIS1          | YPR119W                 | CLB2          |
| YPR131C                                          | NAT3          | YMR198W                 | CIK1          |
| YCR066W                                          | RAD18         | YNL107W                 | YAF9          |
| YJL029C                                          | VPS53         | YKR020W                 | VPS51         |
| YGR004W                                          | PEX31         | YDR479C                 | PEX29         |
| YBR107C                                          | IML3          | YJR063W                 | RPA12         |
| YER139C                                          | YER139C       | YEL060C                 | PRB1          |
| YDL013W                                          | SLX5          | YDR254W                 | CHL4          |
| YOR156C                                          | NFI1          | YOR106W                 | VAM3          |
| YDL006W                                          | PTC1          | YJL187C                 | SWE1          |
| YOL061W                                          | PRS5          | YBL068W                 | PRS4          |
| YGL190C                                          | CDC55         | YPL240C                 | HSP82         |
| YGL115W                                          | SNF4          | YMR054W                 | STV1          |
| YOR112W                                          | CEX1          | YPR032W                 | SRO7          |
| YOR080W                                          | DIA2          | YHL031C                 | GOS1          |
| YOL051W                                          | GAL11         | YGL025C                 | PGD1          |
| YHL031C                                          | GOS1          | YPL195W                 | APL5          |
| YJL053W                                          | PEP8          | YOR112W                 | CEX1          |
| YGL212W                                          | VAM7          | YBR019C                 | GAL10         |
| YNL238W                                          | KEX2          | YEL036C                 | ANP1          |
| YNL291C                                          | MID1          | YNL082W                 | PMS1          |
| YOR195W                                          | SLK19         | YHR115C                 | DMA1          |
| YMR142C                                          | RPL13B        | YMR152W                 | YIM1          |
| YHR060W                                          | VMA22         | YOR035C                 | SHE4          |
| YGL078C                                          | DBP3          | YPR046W                 | MCM16         |
| YHR156C                                          | LIN1          | YER040W                 | GLN3          |
| YDL155W                                          | CLB3          | YJR032W                 | CPR7          |
| YJL124C                                          | LSM1          | YKR026C                 | GCN3          |

| Predictions at threshold level 0.80 continued... |               |                         |               |
|--------------------------------------------------|---------------|-------------------------|---------------|
| Gene1 of predicted pair                          |               | Gene2 of predicted pair |               |
| Systematic Name                                  | Standard Name | Systematic Name         | Standard Name |
| YOL121C                                          | RPS19A        | YPL195W                 | APL5          |
| YLR094C                                          | GIS3          | YML001W                 | YPT7          |
| YPL152W                                          | RRD2          | YGR135W                 | PRE9          |
| YKL116C                                          | PRR1          | YKL126W                 | YPK1          |
| YGL060W                                          | YBP2          | YDL047W                 | SIT4          |
| YFL023W                                          | BUD27         | YOL121C                 | RPS19A        |
| YML115C                                          | VAN1          | YKL048C                 | ELM1          |
| YDL155W                                          | CLB3          | YJR135C                 | MCM22         |
| YBR030W                                          | YBR030W       | YGL212W                 | VAM7          |
| YJR084W                                          | CSN12         | YAL002W                 | VPS8          |
| YGR020C                                          | VMA7          | YNL238W                 | KEX2          |
| YDR146C                                          | SWI5          | YHR039C-A               | VMA10         |
| YDR080W                                          | VPS41         | YNL041C                 | COG6          |
| YDR335W                                          | MSN5          | YOR124C                 | UBP2          |
| YNL297C                                          | MON2          | YDR155C                 | CPR1          |
| YEL009C                                          | GCN4          | YGL066W                 | SGF73         |
| YOR191W                                          | RIS1          | YJL176C                 | SWI3          |
| YKL213C                                          | DOA1          | YCR077C                 | PAT1          |
| YBR030W                                          | YBR030W       | YBR036C                 | CSG2          |
| YFR010W                                          | UBP6          | YGL174W                 | BUD13         |
| YGL133W                                          | ITC1          | YGL066W                 | SGF73         |
| YJL004C                                          | SYS1          | YEL051W                 | VMA8          |
| YPL161C                                          | BEM4          | YDR440W                 | DOT1          |
| YOR083W                                          | WHI5          | YJL058C                 | BIT61         |
| YBL051C                                          | PIN4          | YHL002W                 | HSE1          |
| YDR108W                                          | GSG1          | YJR033C                 | RAV1          |
| YLR079W                                          | SIC1          | YIL103W                 | DPH1          |
| YER144C                                          | UBP5          | YOR043W                 | WHI2          |
| YIR005W                                          | IST3          | YJL006C                 | CTK2          |

| Predictions at threshold level 0.80 continued... |               |                         |               |
|--------------------------------------------------|---------------|-------------------------|---------------|
| Gene1 of predicted pair                          |               | Gene2 of predicted pair |               |
| Systematic Name                                  | Standard Name | Systematic Name         | Standard Name |
| YJR063W                                          | RPA12         | YPR046W                 | MCM16         |
| YGL147C                                          | RPL9A         | YDR261C                 | EXG2          |
| YHR178W                                          | STB5          | YEL053C                 | MAK10         |
| YLR083C                                          | EMP70         | YAR014C                 | BUD14         |
| YKL010C                                          | UFD4          | YDR129C                 | SAC6          |
| YDL020C                                          | RPN4          | YDR155C                 | CPR1          |
| YPL042C                                          | SSN3          | YIL076W                 | SEC28         |
| YPL256C                                          | CLN2          | YHR108W                 | GGA2          |
| YDR379W                                          | RGA2          | YHR115C                 | DMA1          |
| YHR167W                                          | THP2          | YMR038C                 | CCS1          |
| YGL054C                                          | ERV14         | YML071C                 | COG8          |
| YDL160C                                          | DHH1          | YDR422C                 | SIP1          |
| YPR036W                                          | VMA13         | YBR036C                 | CSG2          |
| YJR084W                                          | CSN12         | YDL192W                 | ARF1          |
| YDR057W                                          | YOS9          | YDR144C                 | MKC7          |
| YLR135W                                          | SLX4          | YBR082C                 | UBC4          |
| YKL025C                                          | PAN3          | YGR270W                 | YTA7          |
| YGR241C                                          | YAP1802       | YLR396C                 | VPS33         |
| YNL206C                                          | RTT106        | YNL030W                 | HHF2          |
| YLR337C                                          | VRP1          | YHR178W                 | STB5          |
| YLR109W                                          | AHP1          | YLR043C                 | TRX1          |
| YMR224C                                          | MRE11         | YHR060W                 | VMA22         |
| YIL002C                                          | INP51         | YGL212W                 | VAM7          |
| YNL206C                                          | RTT106        | YKL032C                 | IXR1          |
| YJL004C                                          | SYS1          | YPL120W                 | VPS30         |
| YPL022W                                          | RAD1          | YDR200C                 | VPS64         |
| YPL045W                                          | VPS16         | YDL077C                 | VAM6          |
| YDR004W                                          | RAD57         | YGL163C                 | RAD54         |
| YDR383C                                          | NKP1          | YLR315W                 | NKP2          |

| Predictions at threshold level 0.80 continued... |               |                         |               |
|--------------------------------------------------|---------------|-------------------------|---------------|
| Gene1 of predicted pair                          |               | Gene2 of predicted pair |               |
| Systematic Name                                  | Standard Name | Systematic Name         | Standard Name |
| YMR152W                                          | YIM1          | YBL025W                 | RRN10         |
| YMR116C                                          | ASC1          | YHL002W                 | HSE1          |
| YJL124C                                          | LSM1          | YDR183W                 | PLP1          |
| YML100W                                          | TSL1          | YFL033C                 | RIM15         |
| YPL018W                                          | CTF19         | YML028W                 | TSA1          |
| YMR153W                                          | NUP53         | YPL246C                 | RBD2          |
| YML102W                                          | CAC2          | YOR368W                 | RAD17         |
| YJL124C                                          | LSM1          | YLR350W                 | ORM2          |
| YMR095C                                          | SNO1          | YNL238W                 | KEX2          |
| YKL139W                                          | CTK1          | YNL307C                 | MCK1          |
| YPR018W                                          | RLF2          | YDR318W                 | MCM21         |
| YPL042C                                          | SSN3          | YDL047W                 | SIT4          |
| YDL020C                                          | RPN4          | YOR127W                 | RGA1          |
| YKR099W                                          | BAS1          | YDL077C                 | VAM6          |
| YDL020C                                          | RPN4          | YLR360W                 | VPS38         |
| YDL161W                                          | ENT1          | YHR108W                 | GGA2          |
| YHR039C-A                                        | VMA10         | YER162C                 | RAD4          |
| YDL002C                                          | NHP10         | YKL213C                 | DOA1          |
| YOL145C                                          | CTR9          | YGL237C                 | HAP2          |
| YLR288C                                          | MEC3          | YHR178W                 | STB5          |
| YHR200W                                          | RPN10         | YDL083C                 | RPS16B        |
| YNL243W                                          | SLA2          | YGR078C                 | PAC10         |
| YMR224C                                          | MRE11         | YBR036C                 | CSG2          |
| YLR429W                                          | CRN1          | YDR200C                 | VPS64         |
| YBR019C                                          | GAL10         | YLR180W                 | SAM1          |
| YOR195W                                          | SLK19         | YML095C                 | RAD10         |
| YIL159W                                          | BNR1          | YOR270C                 | VPH1          |
| YFL013C                                          | IES1          | YPL042C                 | SSN3          |
| YNL078W                                          | NIS1          | YHR114W                 | BZZ1          |

| Predictions at threshold level 0.80 continued... |               |                         |               |
|--------------------------------------------------|---------------|-------------------------|---------------|
| Gene1 of predicted pair                          |               | Gene2 of predicted pair |               |
| Systematic Name                                  | Standard Name | Systematic Name         | Standard Name |
| YDR293C                                          | SSD1          | YEL043W                 | YEL043W       |
| YEL065W                                          | SIT1          | YER162C                 | RAD4          |
| YDL223C                                          | HBT1          | YHR039C-A               | VMA10         |
| YER044C                                          | ERG28         | YLR094C                 | GIS3          |
| YJL172W                                          | CPS1          | YNL307C                 | MCK1          |
| YPL115C                                          | BEM3          | YLR360W                 | VPS38         |
| YMR004W                                          | MVP1          | YGL115W                 | SNF4          |
| YOR132W                                          | VPS17         | YMR109W                 | MYO5          |
| YGL078C                                          | DBP3          | YNL325C                 | FIG4          |
| YDR254W                                          | CHL4          | YKL114C                 | APN1          |
| YLR083C                                          | EMP70         | YOR069W                 | VPS5          |
| YKR035W-A                                        | DID2          | YNL041C                 | COG6          |
| YLR102C                                          | APC9          | YDL047W                 | SIT4          |
| YKL139W                                          | CTK1          | YKL126W                 | YPK1          |
| YNL079C                                          | TPM1          | YLR370C                 | ARC18         |
| YLR090W                                          | XDJ1          | YOR337W                 | TEA1          |
| YPL042C                                          | SSN3          | YDR137W                 | RGP1          |
| YAL016W                                          | TPD3          | YGL190C                 | CDC55         |
| YBR108W                                          | YBR108W       | YMR133W                 | REC114        |
| YBR131W                                          | CCZ1          | YNL297C                 | MON2          |
| YBR279W                                          | PAF1          | YGL178W                 | MPT5          |
| YOL111C                                          | MDY2          | YML001W                 | YPT7          |
| YDL020C                                          | RPN4          | YBR020W                 | GAL1          |
| YBL021C                                          | HAP3          | YGR188C                 | BUB1          |
| YER116C                                          | SLX8          | YHR200W                 | RPN10         |
| YOL145C                                          | CTR9          | YHR200W                 | RPN10         |
| YDL020C                                          | RPN4          | YHR114W                 | BZZ1          |
| YML103C                                          | NUP188        | YDR076W                 | RAD55         |
| YGR020C                                          | VMA7          | YML071C                 | COG8          |

| Predictions at threshold level 0.80 continued... |               |                         |               |
|--------------------------------------------------|---------------|-------------------------|---------------|
| Gene1 of predicted pair                          |               | Gene2 of predicted pair |               |
| Systematic Name                                  | Standard Name | Systematic Name         | Standard Name |
| YOR106W                                          | VAM3          | YJL004C                 | SYS1          |
| YEL043W                                          | YEL043W       | YJR033C                 | RAV1          |
| YLR096W                                          | KIN2          | YPR032W                 | SRO7          |
| YBL085W                                          | BOI1          | YGR152C                 | RSR1          |
| YJL154C                                          | VPS35         | YHR161C                 | YAP1801       |
| YGR249W                                          | MGA1          | YER122C                 | GLO3          |
| YPL024W                                          | RMI1          | YOR290C                 | SNF2          |
| YGL124C                                          | MON1          | YER040W                 | GLN3          |
| YGL087C                                          | MMS2          | YMR224C                 | MRE11         |
| YIL103W                                          | DPH1          | YPR046W                 | MCM16         |
| YMR153W                                          | NUP53         | YFR036W                 | CDC26         |
| YLR079W                                          | SIC1          | YDR146C                 | SWI5          |
| YER139C                                          | YER139C       | YBR280C                 | SAF1          |
| YBL047C                                          | EDE1          | YBL087C                 | RPL23A        |
| YMR199W                                          | CLN1          | YHR115C                 | DMA1          |
| YLR337C                                          | VRP1          | YKL048C                 | ELM1          |
| YCR066W                                          | RAD18         | YDL006W                 | PTC1          |
| YOR368W                                          | RAD17         | YOR014W                 | RTS1          |
| YJL172W                                          | CPS1          | YOR035C                 | SHE4          |
| YDR477W                                          | SNF1          | YER027C                 | GAL83         |
| YNL106C                                          | INP52         | YHR134W                 | WSS1          |
| YDL020C                                          | RPN4          | YKL160W                 | ELF1          |
| YLR079W                                          | SIC1          | YCR086W                 | CSM1          |
| YGR072W                                          | UPF3          | YHR077C                 | NMD2          |
| YNR072W                                          | HXT17         | YOR035C                 | SHE4          |
| YNL058C                                          | YNL058C       | YNL307C                 | MCK1          |
| YIL076W                                          | SEC28         | YKL126W                 | YPK1          |
| YNR072W                                          | HXT17         | YOL111C                 | MDY2          |
| YOR127W                                          | RGA1          | YMR216C                 | SKY1          |

| Predictions at threshold level 0.80 continued... |               |                         |               |
|--------------------------------------------------|---------------|-------------------------|---------------|
| Gene1 of predicted pair                          |               | Gene2 of predicted pair |               |
| Systematic Name                                  | Standard Name | Systematic Name         | Standard Name |
| YPL253C                                          | VIK1          | YDL155W                 | CLB3          |
| YNL041C                                          | COG6          | YGR188C                 | BUB1          |
| YJL183W                                          | MNN11         | YBR082C                 | UBC4          |
| YDR146C                                          | SWI5          | YGL148W                 | ARO2          |
| YNL243W                                          | SLA2          | YPR173C                 | VPS4          |
| YMR055C                                          | BUB2          | YGL250W                 | RMR1          |
| YPL050C                                          | MNN9          | YKL213C                 | DOA1          |
| YJR060W                                          | CBF1          | YDL077C                 | VAM6          |
| YIL053W                                          | RHR2          | YKL126W                 | YPK1          |
| YJR060W                                          | CBF1          | YOL018C                 | TLG2          |
| YIL076W                                          | SEC28         | YJL172W                 | CPS1          |
| YMR276W                                          | DSK2          | YPL248C                 | GAL4          |
| YNL238W                                          | KEX2          | YDL006W                 | PTC1          |
| YDL116W                                          | NUP84         | YLR234W                 | TOP3          |
| YMR142C                                          | RPL13B        | YMR016C                 | SOK2          |
| YJL004C                                          | SYS1          | YLR309C                 | IMH1          |
| YGR081C                                          | SLX9          | YKR095W                 | MLP1          |
| YFR030W                                          | MET10         | YGL252C                 | RTG2          |
| YER044C                                          | ERG28         | YPL195W                 | APL5          |
| YML102W                                          | CAC2          | YPR119W                 | CLB2          |
| YLR090W                                          | XDJ1          | YMR230W                 | RPS10B        |
| YOR039W                                          | CKB2          | YJR032W                 | CPR7          |
| YGR019W                                          | UGA1          | YHR134W                 | WSS1          |
| YPR084W                                          | YPR084W       | YOR038C                 | HIR2          |
| YPR017C                                          | DSS4          | YHR060W                 | VMA22         |
| YLR435W                                          | TSR2          | YLR350W                 | ORM2          |
| YLR315W                                          | NKP2          | YJR135C                 | MCM22         |
| YPL037C                                          | EGD1          | YKR001C                 | VPS1          |
| YDR137W                                          | RGP1          | YMR038C                 | CCS1          |



| Predictions at threshold level 0.80 continued... |               |                         |               |
|--------------------------------------------------|---------------|-------------------------|---------------|
| Gene1 of predicted pair                          |               | Gene2 of predicted pair |               |
| Systematic Name                                  | Standard Name | Systematic Name         | Standard Name |
| YMR039C                                          | SUB1          | YNL206C                 | RTT106        |
| YNL079C                                          | TPM1          | YKL041W                 | VPS24         |
| YMR039C                                          | SUB1          | YDR318W                 | MCM21         |
| YPL037C                                          | EGD1          | YJR032W                 | CPR7          |
| YOL051W                                          | GAL11         | YOR101W                 | RAS1          |
| YBR173C                                          | UMP1          | YPR036W                 | VMA13         |
| YBL047C                                          | EDE1          | YJR035W                 | RAD26         |
| YBL058W                                          | SHP1          | YDR261C                 | EXG2          |
| YPR119W                                          | CLB2          | YNL197C                 | WHI3          |
| YDR383C                                          | NKP1          | YOR141C                 | ARP8          |
| YHR039C-A                                        | VMA10         | YCR077C                 | PAT1          |
| YML115C                                          | VAN1          | YPL256C                 | CLN2          |
| YGL033W                                          | HOP2          | YNL032W                 | SIW14         |
| YLR288C                                          | MEC3          | YDL059C                 | RAD59         |
| YIL156W                                          | UBP7          | YER115C                 | SPR6          |
| YLR410W                                          | VIP1          | YDR183W                 | PLP1          |
| YNL051W                                          | COG5          | YER122C                 | GLO3          |
| YHR013C                                          | ARD1          | YPL018W                 | CTF19         |
| YNL215W                                          | IES2          | YJL124C                 | LSM1          |
| YGL060W                                          | YBP2          | YDR254W                 | CHL4          |
| YFR031C-A                                        | RPL2A         | YNL297C                 | MON2          |
| YMR284W                                          | YKU70         | YDR207C                 | UME6          |
| YOR270C                                          | VPH1          | YBR019C                 | GAL10         |
| YJL006C                                          | CTK2          | YPR046W                 | MCM16         |
| YDR129C                                          | SAC6          | YBR200W                 | BEM1          |
| YGR020C                                          | VMA7          | YGL223C                 | COG1          |
| YIL148W                                          | RPL40A        | YMR273C                 | ZDS1          |
| YGL163C                                          | RAD54         | YOR141C                 | ARP8          |
| YHR084W                                          | STE12         | YHR030C                 | SLT2          |

| Predictions at threshold level 0.80 continued... |               |                         |               |
|--------------------------------------------------|---------------|-------------------------|---------------|
| Gene1 of predicted pair                          |               | Gene2 of predicted pair |               |
| Systematic Name                                  | Standard Name | Systematic Name         | Standard Name |
| YMR179W                                          | SPT21         | YPR046W                 | MCM16         |
| YJL078C                                          | PRY3          | YDR105C                 | TMS1          |
| YBL103C                                          | RTG3          | YDR137W                 | RGP1          |
| YNL291C                                          | MID1          | YML115C                 | VAN1          |
| YBR228W                                          | SLX1          | YLR410W                 | VIP1          |
| YKR061W                                          | KTR2          | YPR046W                 | MCM16         |
| YMR055C                                          | BUB2          | YBR114W                 | RAD16         |
| YCR002C                                          | CDC10         | YJL187C                 | SWE1          |
| YNL291C                                          | MID1          | YDR108W                 | GSG1          |
| YMR127C                                          | SAS2          | YKL160W                 | ELF1          |
| YPR052C                                          | NHP6A         | YDR225W                 | HTA1          |
| YDR176W                                          | NGG1          | YBR010W                 | HHT1          |
| YPL105C                                          | YPL105C       | YKL074C                 | MUD2          |
| YGL100W                                          | SEH1          | YNL250W                 | RAD50         |
| YGL025C                                          | PGD1          | YBR010W                 | HHT1          |
| YBR108W                                          | YBR108W       | YLR144C                 | ACF2          |
| YER115C                                          | SPR6          | YOR358W                 | HAP5          |
| YKL007W                                          | CAP1          | YGL212W                 | VAM7          |
| YMR199W                                          | CLN1          | YMR125W                 | STO1          |
| YBR030W                                          | YBR030W       | YOR043W                 | WHI2          |
| YMR153W                                          | NUP53         | YBR200W                 | BEM1          |
| YPL018W                                          | CTF19         | YLR233C                 | EST1          |
| YOR312C                                          | RPL20B        | YOR035C                 | SHE4          |
| YMR142C                                          | RPL13B        | YJR056C                 | YJR056C       |
| YDR477W                                          | SNF1          | YGL035C                 | MIG1          |
| YOR106W                                          | VAM3          | YDR080W                 | VPS41         |
| YKL129C                                          | MYO3          | YHR016C                 | YSC84         |
| YGL115W                                          | SNF4          | YOR141C                 | ARP8          |
| YGR261C                                          | APL6          | YML071C                 | COG8          |

| Predictions at threshold level 0.80 continued... |               |                         |               |
|--------------------------------------------------|---------------|-------------------------|---------------|
| Gene1 of predicted pair                          |               | Gene2 of predicted pair |               |
| Systematic Name                                  | Standard Name | Systematic Name         | Standard Name |
| YKL204W                                          | EAP1          | YJL095W                 | BCK1          |
| YKR048C                                          | NAP1          | YGL252C                 | RTG2          |
| YEL053C                                          | MAK10         | YMR214W                 | SCJ1          |
| YJL176C                                          | SWI3          | YDL155W                 | CLB3          |
| YDR004W                                          | RAD57         | YDR225W                 | HTA1          |
| YNL087W                                          | TCB2          | YPR030W                 | CSR2          |
| YHR200W                                          | RPN10         | YBR019C                 | GAL10         |
| YBR030W                                          | YBR030W       | YER139C                 | YER139C       |
| YDL184C                                          | RPL41A        | YOL081W                 | IRA2          |
| YNL106C                                          | INP52         | YNR052C                 | POP2          |
| YMR224C                                          | MRE11         | YBR274W                 | CHK1          |
| YCL010C                                          | SGF29         | YOL148C                 | SPT20         |
| YOR270C                                          | VPH1          | YER040W                 | GLN3          |
| YLR320W                                          | MMS22         | YCR031C                 | RPS14A        |
| YPR084W                                          | YPR084W       | YGR261C                 | APL6          |
| YPL024W                                          | RMI1          | YBR280C                 | SAF1          |
| YBR194W                                          | SOY1          | YDR254W                 | CHL4          |
| YAL024C                                          | LTE1          | YBR019C                 | GAL10         |
| YOL030W                                          | GAS5          | YOL090W                 | MSH2          |
| YLR350W                                          | ORM2          | YOL081W                 | IRA2          |
| YGL033W                                          | HOP2          | YBR280C                 | SAF1          |
| YMR127C                                          | SAS2          | YDR318W                 | MCM21         |
| YIL076W                                          | SEC28         | YJL124C                 | LSM1          |
| YER120W                                          | SCS2          | YDL077C                 | VAM6          |
| YIL076W                                          | SEC28         | YHR081W                 | LRP1          |
| YBL103C                                          | RTG3          | YKR035W-A               | DID2          |
| YPL253C                                          | VIK1          | YJR135C                 | MCM22         |
| YGR072W                                          | UPF3          | YDR310C                 | SUM1          |
| YDR156W                                          | RPA14         | YLR182W                 | SWI6          |

| Predictions at threshold level 0.80 continued... |               |                         |               |
|--------------------------------------------------|---------------|-------------------------|---------------|
| Gene1 of predicted pair                          |               | Gene2 of predicted pair |               |
| Systematic Name                                  | Standard Name | Systematic Name         | Standard Name |
| YOR195W                                          | SLK19         | YGL252C                 | RTG2          |
| YDR318W                                          | MCM21         | YPL018W                 | CTF19         |
| YGR270W                                          | YTA7          | YER139C                 | YER139C       |
| YNL218W                                          | MGS1          | YPL024W                 | RMI1          |
| YDR440W                                          | DOT1          | YMR038C                 | CCS1          |
| YGL078C                                          | DBP3          | YER044C                 | ERG28         |
| YPL246C                                          | RBD2          | YKR024C                 | DBP7          |
| YJL127C                                          | SPT10         | YML016C                 | PPZ1          |
| YLR288C                                          | MEC3          | YMR055C                 | BUB2          |
| YNL238W                                          | KEX2          | YFR036W                 | CDC26         |
| YOR327C                                          | SNC2          | YLR180W                 | SAM1          |
| YGL237C                                          | HAP2          | YGR270W                 | YTA7          |
| YOR001W                                          | RRP6          | YEL013W                 | VAC8          |
| YIL159W                                          | BNR1          | YMR142C                 | RPL13B        |
| YLR337C                                          | VRP1          | YOR312C                 | RPL20B        |
| YBL103C                                          | RTG3          | YKL126W                 | YPK1          |
| YPL152W                                          | RRD2          | YCR086W                 | CSM1          |
| YKR072C                                          | SIS2          | YMR284W                 | YKU70         |
| YKL110C                                          | KTI12         | YJR060W                 | CBF1          |
| YMR004W                                          | MVP1          | YOL108C                 | INO4          |
| YAL020C                                          | ATS1          | YNL289W                 | PCL1          |
| YDR335W                                          | MSN5          | YPR120C                 | CLB5          |
| YPL161C                                          | BEM4          | YLR094C                 | GIS3          |
| YMR284W                                          | YKU70         | YCR086W                 | CSM1          |
| YOR195W                                          | SLK19         | YHR152W                 | SPO12         |
| YDR156W                                          | RPA14         | YNL248C                 | RPA49         |
| YDR507C                                          | GIN4          | YIL008W                 | URM1          |
| YFL023W                                          | BUD27         | YNL058C                 | YNL058C       |
| YDR174W                                          | HMO1          | YHR134W                 | WSS1          |

| Predictions at threshold level 0.80 continued... |               |                         |               |
|--------------------------------------------------|---------------|-------------------------|---------------|
| Gene1 of predicted pair                          |               | Gene2 of predicted pair |               |
| Systematic Name                                  | Standard Name | Systematic Name         | Standard Name |
| YDL192W                                          | ARF1          | YEL060C                 | PRB1          |
| YJL154C                                          | VPS35         | YBR171W                 | SEC66         |
| YMR095C                                          | SNO1          | YJL172W                 | CPS1          |
| YJR140C                                          | HIR3          | YAL002W                 | VPS8          |
| YPL057C                                          | SUR1          | YOR327C                 | SNC2          |
| YLR192C                                          | HCR1          | YER122C                 | GLO3          |
| YPL042C                                          | SSN3          | YER139C                 | YER139C       |
| YLR234W                                          | TOP3          | YOR368W                 | RAD17         |
| YHR119W                                          | SET1          | YPL138C                 | SPP1          |
| YGR072W                                          | UPF3          | YNL127W                 | FAR11         |
| YLR386W                                          | VAC14         | YIL008W                 | URM1          |
| YGL087C                                          | MMS2          | YDR293C                 | SSD1          |
| YCL037C                                          | SRO9          | YNL199C                 | GCR2          |
| YML115C                                          | VAN1          | YOL111C                 | MDY2          |
| YMR004W                                          | MVP1          | YNL041C                 | COG6          |
| YJR056C                                          | YJR056C       | YLR093C                 | NYV1          |
| YGR261C                                          | APL6          | YCL037C                 | SRO9          |
| YLR095C                                          | IOC2          | YMR095C                 | SNO1          |
| YER044C                                          | ERG28         | YDL083C                 | RPS16B        |
| YBR215W                                          | HPC2          | YLR352W                 | YLR352W       |
| YKR020W                                          | VPS51         | YGL095C                 | VPS45         |
| YLR234W                                          | TOP3          | YDL155W                 | CLB3          |
| YDL127W                                          | PCL2          | YPL001W                 | HAT1          |
| YLR313C                                          | SPH1          | YNL016W                 | PUB1          |
| YJL089W                                          | SIP4          | YGL115W                 | SNF4          |
| YBL047C                                          | EDE1          | YKL041W                 | VPS24         |
| YKL139W                                          | CTK1          | YJR063W                 | RPA12         |
| YDR254W                                          | CHL4          | YML028W                 | TSA1          |
| YGL087C                                          | MMS2          | YBR108W                 | YBR108W       |

| Predictions at threshold level 0.80 continued... |               |                         |               |
|--------------------------------------------------|---------------|-------------------------|---------------|
| Gene1 of predicted pair                          |               | Gene2 of predicted pair |               |
| Systematic Name                                  | Standard Name | Systematic Name         | Standard Name |
| YDL020C                                          | RPN4          | YHL002W                 | HSE1          |
| YLR399C                                          | BDF1          | YLR254C                 | NDL1          |
| YBR173C                                          | UMP1          | YDL083C                 | RPS16B        |
| YNL166C                                          | BNI5          | YJR032W                 | CPR7          |
| YPL089C                                          | RLM1          | YJL095W                 | BCK1          |
| YDR477W                                          | SNF1          | YNL307C                 | MCK1          |
| YEL043W                                          | YEL043W       | YNL127W                 | FAR11         |
| YGL087C                                          | MMS2          | YDL059C                 | RAD59         |
| YMR016C                                          | SOK2          | YBL025W                 | RRN10         |
| YDR358W                                          | GGA1          | YOR036W                 | PEP12         |
| YNL032W                                          | SIW14         | YNR072W                 | HXT17         |
| YHR114W                                          | BZZ1          | YAL002W                 | VPS8          |
| YIL159W                                          | BNR1          | YER116C                 | SLX8          |
| YML001W                                          | YPT7          | YLR398C                 | SKI2          |
| YNL238W                                          | KEX2          | YBR019C                 | GAL10         |
| YDL006W                                          | PTC1          | YKL041W                 | VPS24         |
| YDR080W                                          | VPS41         | YMR216C                 | SKY1          |
| YGR270W                                          | YTA7          | YNL116W                 | DMA2          |
| YGL223C                                          | COG1          | YKR014C                 | YPT52         |
| YEL065W                                          | SIT1          | YNL032W                 | SIW14         |
| YBR112C                                          | CYC8          | YDL005C                 | MED2          |
| YOR195W                                          | SLK19         | YHR200W                 | RPN10         |
| YLR386W                                          | VAC14         | YNL206C                 | RTT106        |
| YML071C                                          | COG8          | YER122C                 | GLO3          |
| YBL027W                                          | RPL19B        | YCR077C                 | PAT1          |
| YLR320W                                          | MMS22         | YLR180W                 | SAM1          |
| YML016C                                          | PPZ1          | YBL021C                 | HAP3          |
| YEL053C                                          | MAK10         | YNL076W                 | MKS1          |
| YNR072W                                          | HXT17         | YER040W                 | GLN3          |

| Predictions at threshold level 0.80 continued... |               |                         |               |
|--------------------------------------------------|---------------|-------------------------|---------------|
| Gene1 of predicted pair                          |               | Gene2 of predicted pair |               |
| Systematic Name                                  | Standard Name | Systematic Name         | Standard Name |
| YNL238W                                          | KEX2          | YKL041W                 | VPS24         |
| YER139C                                          | YER139C       | YEL013W                 | VAC8          |
| YPR036W                                          | VMA13         | YGR020C                 | VMA7          |
| YER162C                                          | RAD4          | YOR368W                 | RAD17         |
| YKL073W                                          | LHS1          | YBR138C                 | YBR138C       |
| YLR191W                                          | PEX13         | YLR181C                 | VTA1          |
| YLR095C                                          | IOC2          | YIL159W                 | BNR1          |
| YGL033W                                          | HOP2          | YDL077C                 | VAM6          |
| YDL013W                                          | SLX5          | YMR038C                 | CCS1          |
| YNL218W                                          | MGS1          | YMR224C                 | MRE11         |
| YCR086W                                          | CSM1          | YHL002W                 | HSE1          |
| YNL087W                                          | TCB2          | YPL195W                 | APL5          |
| YKR001C                                          | VPS1          | YMR022W                 | UBC7          |
| YMR179W                                          | SPT21         | YDR318W                 | MCM21         |
| YDR378C                                          | LSM6          | YNL145W                 | MFA2          |
| YDR477W                                          | SNF1          | YPL137C                 | GIP3          |
| YOR001W                                          | RRP6          | YOL091W                 | SPO21         |
| YHR111W                                          | UBA4          | YNL229C                 | URE2          |
| YLR292C                                          | SEC72         | YDR289C                 | RTT103        |
| YAL024C                                          | LTE1          | YLR315W                 | NKP2          |
| YKL116C                                          | PRR1          | YEL053C                 | MAK10         |
| YJR060W                                          | CBF1          | YLR370C                 | ARC18         |
| YOR191W                                          | RIS1          | YPL079W                 | RPL21B        |
| YPL115C                                          | BEM3          | YHL002W                 | HSE1          |
| YKL139W                                          | CTK1          | YPL037C                 | EGD1          |
| YPR017C                                          | DSS4          | YJL154C                 | VPS35         |
| YOR290C                                          | SNF2          | YPR072W                 | NOT5          |
| YNR052C                                          | POP2          | YKR061W                 | KTR2          |
| YMR054W                                          | STV1          | YOL018C                 | TLG2          |

| Predictions at threshold level 0.80 continued... |               |                         |               |
|--------------------------------------------------|---------------|-------------------------|---------------|
| Gene1 of predicted pair                          |               | Gene2 of predicted pair |               |
| Systematic Name                                  | Standard Name | Systematic Name         | Standard Name |
| YFR010W                                          | UBP6          | YPL057C                 | SUR1          |
| YPL253C                                          | VIK1          | YGL163C                 | RAD54         |
| YKL139W                                          | CTK1          | YDL047W                 | SIT4          |
| YDR382W                                          | RPP2B         | YJL124C                 | LSM1          |
| YJR060W                                          | CBF1          | YNL127W                 | FAR11         |
| YLR095C                                          | IOC2          | YOR327C                 | SNC2          |
| YML097C                                          | VPS9          | YKL041W                 | VPS24         |
| YMR153W                                          | NUP53         | YER110C                 | KAP123        |
| YHR156C                                          | LIN1          | YNL238W                 | KEX2          |
| YPL178W                                          | CBC2          | YDL047W                 | SIT4          |
| YNL243W                                          | SLA2          | YPL086C                 | ELP3          |
| YDR174W                                          | HMO1          | YNL215W                 | IES2          |
| YDR227W                                          | SIR4          | YMR106C                 | YKU80         |
| YGL133W                                          | ITC1          | YNL068C                 | FKH2          |
| YGR159C                                          | NSR1          | YIL079C                 | AIR1          |
| YOR023C                                          | AHC1          | YGR188C                 | BUB1          |
| YDR443C                                          | SSN2          | YFR010W                 | UBP6          |
| YBL008W                                          | HIR1          | YGR188C                 | BUB1          |
| YOR106W                                          | VAM3          | YCL001W                 | RER1          |
| YBR200W                                          | BEM1          | YGR152C                 | RSR1          |
| YLR148W                                          | PEP3          | YDR484W                 | VPS52         |
| YHL031C                                          | GOS1          | YOR124C                 | UBP2          |
| YLR018C                                          | POM34         | YDR385W                 | EFT2          |
| YHR084W                                          | STE12         | YHL007C                 | STE20         |
| YNL243W                                          | SLA2          | YHR016C                 | YSC84         |
| YBR108W                                          | YBR108W       | YLR094C                 | GIS3          |
| YGL060W                                          | YBP2          | YBR215W                 | HPC2          |
| YLR192C                                          | HCR1          | YBL103C                 | RTG3          |
| YKR001C                                          | VPS1          | YDL155W                 | CLB3          |



| Predictions at threshold level 0.80 continued... |               |                         |               |
|--------------------------------------------------|---------------|-------------------------|---------------|
| Gene1 of predicted pair                          |               | Gene2 of predicted pair |               |
| Systematic Name                                  | Standard Name | Systematic Name         | Standard Name |
| YOR304W                                          | ISW2          | YDR207C                 | UME6          |
| YNL076W                                          | MKS1          | YOL081W                 | IRA2          |
| YBL103C                                          | RTG3          | YOL111C                 | MDY2          |
| YER116C                                          | SLX8          | YML102W                 | CAC2          |
| YMR172W                                          | HOT1          | YBR171W                 | SEC66         |
| YDR310C                                          | SUM1          | YER040W                 | GLN3          |
| YKL068W                                          | NUP100        | YDR207C                 | UME6          |
| YNL291C                                          | MID1          | YPL120W                 | VPS30         |
| YMR224C                                          | MRE11         | YDR207C                 | UME6          |
| YIL053W                                          | RHR2          | YDL083C                 | RPS16B        |
| YPL046C                                          | ELC1          | YMR201C                 | RAD14         |
| YLR148W                                          | PEP3          | YCR088W                 | ABP1          |
| YPL253C                                          | VIK1          | YLR315W                 | NKP2          |
| YDR378C                                          | LSM6          | YGL163C                 | RAD54         |
| YDL077C                                          | VAM6          | YNL147W                 | LSM7          |
| YDL192W                                          | ARF1          | YAL030W                 | SNC1          |
| YGL033W                                          | HOP2          | YGL124C                 | MON1          |
| YBR107C                                          | IML3          | YKL110C                 | KTI12         |
| YMR198W                                          | CIK1          | YPL253C                 | VIK1          |
| YBR030W                                          | YBR030W       | YHR081W                 | LRP1          |
| YOR308C                                          | SNU66         | YLR182W                 | SWI6          |
| YDR156W                                          | RPA14         | YJL006C                 | CTK2          |
| YCL037C                                          | SRO9          | YJR033C                 | RAV1          |
| YDL083C                                          | RPS16B        | YLR398C                 | SKI2          |
| YDR484W                                          | VPS52         | YEL053C                 | MAK10         |
| YFR010W                                          | UBP6          | YHR200W                 | RPN10         |
| YDL239C                                          | ADY3          | YOL091W                 | SPO21         |
| YOL091W                                          | SPO21         | YOR177C                 | MPC54         |
| YMR092C                                          | AIP1          | YGR080W                 | TWF1          |

| Predictions at threshold level 0.80 continued... |               |                         |               |
|--------------------------------------------------|---------------|-------------------------|---------------|
| Gene1 of predicted pair                          |               | Gene2 of predicted pair |               |
| Systematic Name                                  | Standard Name | Systematic Name         | Standard Name |
| YHR160C                                          | PEX18         | YDR142C                 | PEX7          |
| YOR195W                                          | SLK19         | YJL095W                 | BCK1          |
| YGR261C                                          | APL6          | YHL031C                 | GOS1          |
| YOR080W                                          | DIA2          | YOR038C                 | HIR2          |
| YHR060W                                          | VMA22         | YPL195W                 | APL5          |
| YER116C                                          | SLX8          | YLR352W                 | YLR352W       |
| YOR140W                                          | SFL1          | YMR311C                 | GLC8          |
| YBR171W                                          | SEC66         | YNL238W                 | KEX2          |
| YBL008W                                          | HIR1          | YEL050C                 | RML2          |
| YHL020C                                          | OPI1          | YPL195W                 | APL5          |
| YPR036W                                          | VMA13         | YGR188C                 | BUB1          |
| YCR034W                                          | FEN1          | YOR039W                 | CKB2          |
| YIL053W                                          | RHR2          | YBR030W                 | YBR030W       |
| YGL133W                                          | ITC1          | YKL101W                 | HSL1          |
| YML001W                                          | YPT7          | YJL183W                 | MNN11         |
| YBR171W                                          | SEC66         | YMR055C                 | BUB2          |
| YMR055C                                          | BUB2          | YPR120C                 | CLB5          |
| YNL069C                                          | RPL16B        | YJR060W                 | CBF1          |
| YHR157W                                          | REC104        | YPR119W                 | CLB2          |
| YOR033C                                          | EXO1          | YOL030W                 | GAS5          |
| YMR172W                                          | HOT1          | YKL048C                 | ELM1          |
| YOR290C                                          | SNF2          | YNL238W                 | KEX2          |
| YGL003C                                          | CDH1          | YER139C                 | YER139C       |
| YCR086W                                          | CSM1          | YDR310C                 | SUM1          |
| YNL201C                                          | PSY2          | YJR063W                 | RPA12         |
| YNL199C                                          | GCR2          | YMR311C                 | GLC8          |
| YKR099W                                          | BAS1          | YOL121C                 | RPS19A        |
| YOR127W                                          | RGA1          | YBL087C                 | RPL23A        |
| YDR448W                                          | ADA2          | YPL129W                 | TAF14         |

| Predictions at threshold level 0.80 continued... |               |                         |               |
|--------------------------------------------------|---------------|-------------------------|---------------|
| Gene1 of predicted pair                          |               | Gene2 of predicted pair |               |
| Systematic Name                                  | Standard Name | Systematic Name         | Standard Name |
| YGL158W                                          | RCK1          | YDR423C                 | CAD1          |
| YOR337W                                          | TEA1          | YMR214W                 | SCJ1          |
| YDR283C                                          | GCN2          | YFR009W                 | GCN20         |
| YJL204C                                          | RCY1          | YHR012W                 | VPS29         |
| YJL060W                                          | BNA3          | YPR131C                 | NAT3          |
| YHR152W                                          | SPO12         | YHR115C                 | DMA1          |
| YGR019W                                          | UGA1          | YML016C                 | PPZ1          |
| YMR199W                                          | CLN1          | YDR422C                 | SIP1          |
| YOR337W                                          | TEA1          | YGL115W                 | SNF4          |
| YAL024C                                          | LTE1          | YDR245W                 | MNN10         |
| YKL213C                                          | DOA1          | YDR440W                 | DOT1          |
| YHR121W                                          | LSM12         | YPR119W                 | CLB2          |
| YML001W                                          | YPT7          | YFR036W                 | CDC26         |
| YPL145C                                          | KES1          | YKL188C                 | PXA2          |
| YPR030W                                          | CSR2          | YOL081W                 | IRA2          |
| YHR178W                                          | STB5          | YHR111W                 | UBA4          |
| YGL200C                                          | EMP24         | YML067C                 | ERV41         |
| YBL005W                                          | PDR3          | YPR119W                 | CLB2          |
| YDR490C                                          | PKH1          | YGR086C                 | PIL1          |
| YGL147C                                          | RPL9A         | YOR337W                 | TEA1          |
| YPL164C                                          | MLH3          | YMR167W                 | MLH1          |
| YOR033C                                          | EXO1          | YER116C                 | SLX8          |
| YER144C                                          | UBP5          | YHR039C-A               | VMA10         |
| YGR270W                                          | YTA7          | YLR315W                 | NKP2          |
| YKL110C                                          | KTI12         | YJR135C                 | MCM22         |
| YPL022W                                          | RAD1          | YLR182W                 | SWI6          |
| YMR198W                                          | CIK1          | YJR005W                 | APL1          |
| YDR477W                                          | SNF1          | YEL036C                 | ANP1          |
| YOR066W                                          | MSA1          | YEL060C                 | PRB1          |

| Predictions at threshold level 0.80 continued... |               |                         |               |
|--------------------------------------------------|---------------|-------------------------|---------------|
| Gene1 of predicted pair                          |               | Gene2 of predicted pair |               |
| Systematic Name                                  | Standard Name | Systematic Name         | Standard Name |
| YPR018W                                          | RLF2          | YDL020C                 | RPN4          |
| YKL139W                                          | CTK1          | YFR036W                 | CDC26         |
| YCL037C                                          | SRO9          | YLR350W                 | ORM2          |
| YBR194W                                          | SOY1          | YNL236W                 | SIN4          |
| YIL103W                                          | DPH1          | YNL107W                 | YAF9          |
| YEL009C                                          | GCN4          | YJL176C                 | SWI3          |
| YGL054C                                          | ERV14         | YER162C                 | RAD4          |
| YFR010W                                          | UBP6          | YOR270C                 | VPH1          |
| YNL218W                                          | MGS1          | YJL187C                 | SWE1          |
| YBL058W                                          | SHP1          | YHR060W                 | VMA22         |
| YLR337C                                          | VRP1          | YJR084W                 | CSN12         |
| YKL032C                                          | IXR1          | YBR260C                 | RGD1          |
| YBL008W                                          | HIR1          | YCR031C                 | RPS14A        |
| YMR311C                                          | GLC8          | YDR207C                 | UME6          |
| YIL076W                                          | SEC28         | YMR016C                 | SOK2          |
| YDR477W                                          | SNF1          | YMR230W                 | RPS10B        |
| YLR090W                                          | XDJ1          | YIL053W                 | RHR2          |
| YPL024W                                          | RMI1          | YNL291C                 | MID1          |
| YDR363W-A                                        | SEM1          | YDL006W                 | PTC1          |
| YFR036W                                          | CDC26         | YER040W                 | GLN3          |
| YDR183W                                          | PLP1          | YGL252C                 | RTG2          |
| YBR217W                                          | ATG12         | YOR043W                 | WHI2          |
| YML115C                                          | VAN1          | YHR081W                 | LRP1          |
| YNL215W                                          | IES2          | YMR198W                 | CIK1          |
| YIL148W                                          | RPL40A        | YPL246C                 | RBD2          |
| YGR184C                                          | UBR1          | YOR014W                 | RTS1          |
| YMR127C                                          | SAS2          | YKL048C                 | ELM1          |
| YOR212W                                          | STE4          | YDR264C                 | AKR1          |
| YKL048C                                          | ELM1          | YGL151W                 | NUT1          |

| Predictions at threshold level 0.80 continued... |               |                         |               |
|--------------------------------------------------|---------------|-------------------------|---------------|
| Gene1 of predicted pair                          |               | Gene2 of predicted pair |               |
| Systematic Name                                  | Standard Name | Systematic Name         | Standard Name |
| YDR004W                                          | RAD57         | YJR135C                 | MCM22         |
| YJR056C                                          | YJR056C       | YKL048C                 | ELM1          |
| YMR095C                                          | SNO1          | YDL192W                 | ARF1          |
| YKR035W-A                                        | DID2          | YLR093C                 | NYV1          |
| YDL013W                                          | SLX5          | YLR410W                 | VIP1          |
| YGL043W                                          | DST1          | YBR111W-A               | SUS1          |
| YNL087W                                          | TCB2          | YLR370C                 | ARC18         |
| YJR056C                                          | YJR056C       | YNL076W                 | MKS1          |
| YGR133W                                          | PEX4          | YAL002W                 | VPS8          |
| YIL159W                                          | BNR1          | YBR108W                 | YBR108W       |
| YLR429W                                          | CRN1          | YPR046W                 | MCM16         |
| YNL201C                                          | PSY2          | YML112W                 | CTK3          |
| YBR084C-A                                        | RPL19A        | YGL031C                 | RPL24A        |
| YGL078C                                          | DBP3          | YOL121C                 | RPS19A        |
| YMR153W                                          | NUP53         | YGL212W                 | VAM7          |
| YER044C                                          | ERG28         | YER040W                 | GLN3          |
| YCL001W                                          | RER1          | YML001W                 | YPT7          |
| YLR441C                                          | RPS1A         | YOL111C                 | MDY2          |
| YLR441C                                          | RPS1A         | YDL192W                 | ARF1          |
| YOR127W                                          | RGA1          | YKR020W                 | VPS51         |
| YBL067C                                          | UBP13         | YJL095W                 | BCK1          |
| YDR335W                                          | MSN5          | YFR036W                 | CDC26         |
| YDR383C                                          | NKP1          | YIR005W                 | IST3          |
| YHR200W                                          | RPN10         | YMR152W                 | YIM1          |
| YPR102C                                          | RPL11A        | YOR078W                 | BUD21         |
| YKR020W                                          | VPS51         | YNR032W                 | PPG1          |
| YHR012W                                          | VPS29         | YLR233C                 | EST1          |
| YPL057C                                          | SUR1          | YDL013W                 | SLX5          |
| YBR084C-A                                        | RPL19A        | YKL032C                 | IXR1          |

| Predictions at threshold level 0.80 continued... |               |                         |               |
|--------------------------------------------------|---------------|-------------------------|---------------|
| Gene1 of predicted pair                          |               | Gene2 of predicted pair |               |
| Systematic Name                                  | Standard Name | Systematic Name         | Standard Name |
| YMR202W                                          | ERG2          | YKL048C                 | ELM1          |
| YLR360W                                          | VPS38         | YLR381W                 | CTF3          |
| YGR217W                                          | CCH1          | YLR320W                 | MMS22         |
| YHR149C                                          | SKG6          | YMR273C                 | ZDS1          |
| YGR041W                                          | BUD9          | YOR301W                 | RAX1          |
| YLR119W                                          | SRN2          | YPL161C                 | BEM4          |
| YHR039C-A                                        | VMA10         | YCR086W                 | CSM1          |
| YGR142W                                          | BTN2          | YBR264C                 | YPT10         |
| YIR005W                                          | IST3          | YOR141C                 | ARP8          |
| YMR133W                                          | REC114        | YCR053W                 | THR4          |
| YDL223C                                          | HBT1          | YGL115W                 | SNF4          |
| YOR270C                                          | VPH1          | YJL095W                 | BCK1          |
| YER115C                                          | SPR6          | YKL068W                 | NUP100        |
| YKR001C                                          | VPS1          | YEL051W                 | VMA8          |
| YLR313C                                          | SPH1          | YOL090W                 | MSH2          |
| YGL174W                                          | BUD13         | YOR308C                 | SNU66         |
| YMR116C                                          | ASC1          | YJL187C                 | SWE1          |
| YBR098W                                          | MMS4          | YGL100W                 | SEH1          |
| YBR217W                                          | ATG12         | YPL057C                 | SUR1          |
| YEL051W                                          | VMA8          | YNL051W                 | COG5          |
| YMR142C                                          | RPL13B        | YNL032W                 | SIW14         |
| YOR033C                                          | EXO1          | YGL031C                 | RPL24A        |
| YHR114W                                          | BZZ1          | YDR310C                 | SUM1          |
| YOR035C                                          | SHE4          | YDR323C                 | PEP7          |
| YJR063W                                          | RPA12         | YJL140W                 | RPB4          |
| YEL043W                                          | YEL043W       | YOL018C                 | TLG2          |
| YNL058C                                          | YNL058C       | YOR327C                 | SNC2          |
| YKL139W                                          | CTK1          | YKL160W                 | ELF1          |
| YMR167W                                          | MLH1          | YCR031C                 | RPS14A        |

| Predictions at threshold level 0.80 continued... |               |                         |               |
|--------------------------------------------------|---------------|-------------------------|---------------|
| Gene1 of predicted pair                          |               | Gene2 of predicted pair |               |
| Systematic Name                                  | Standard Name | Systematic Name         | Standard Name |
| YPL195W                                          | APL5          | YLR398C                 | SKI2          |
| YFL023W                                          | BUD27         | YDR261C                 | EXG2          |
| YNL166C                                          | BNI5          | YHR114W                 | BZZ1          |
| YHR073W                                          | OSH3          | YLR018C                 | POM34         |
| YKL139W                                          | CTK1          | YPR030W                 | CSR2          |
| YPL249C-A                                        | RPL36B        | YPR119W                 | CLB2          |
| YIL053W                                          | RHR2          | YLR093C                 | NYV1          |
| YGL033W                                          | HOP2          | YKL126W                 | YPK1          |
| YLR360W                                          | VPS38         | YER110C                 | KAP123        |
| YER162C                                          | RAD4          | YFR036W                 | CDC26         |
| YDL116W                                          | NUP84         | YPL256C                 | CLN2          |
| YDR174W                                          | HMO1          | YNL106C                 | INP52         |
| YGR072W                                          | UPF3          | YHL020C                 | OPI1          |
| YDR254W                                          | CHL4          | YFR030W                 | MET10         |
| YOL111C                                          | MDY2          | YHR081W                 | LRP1          |
| YDR293C                                          | SSD1          | YLR233C                 | EST1          |
| YOR023C                                          | AHC1          | YBR107C                 | IML3          |
| YDR507C                                          | GIN4          | YBR084C-A               | RPL19A        |
| YBR217W                                          | ATG12         | YDR261C                 | EXG2          |
| YFR031C-A                                        | RPL2A         | YGL212W                 | VAM7          |
| YCL001W                                          | RER1          | YFL033C                 | RIM15         |
| YNL291C                                          | MID1          | YKR020W                 | VPS51         |
| YBR009C                                          | HHF1          | YNL030W                 | HHF2          |
| YKR099W                                          | BAS1          | YJL183W                 | MNN11         |
| YNL139C                                          | RLR1          | YOR001W                 | RRP6          |
| YIL053W                                          | RHR2          | YFL023W                 | BUD27         |
| YDL020C                                          | RPN4          | YLR234W                 | TOP3          |
| YJL053W                                          | PEP8          | YCL001W                 | RER1          |
| YKR099W                                          | BAS1          | YLR371W                 | ROM2          |

| Predictions at threshold level 0.80 continued... |               |                         |               |
|--------------------------------------------------|---------------|-------------------------|---------------|
| Gene1 of predicted pair                          |               | Gene2 of predicted pair |               |
| Systematic Name                                  | Standard Name | Systematic Name         | Standard Name |
| YNL106C                                          | INP52         | YNL116W                 | DMA2          |
| YNL297C                                          | MON2          | YPL105C                 | YPL105C       |
| YGR261C                                          | APL6          | YKR030W                 | GMH1          |
| YJL029C                                          | VPS53         | YDR323C                 | PEP7          |
| YMR133W                                          | REC114        | YLR371W                 | ROM2          |
| YEL060C                                          | PRB1          | YER122C                 | GLO3          |
| YHL031C                                          | GOS1          | YNL297C                 | MON2          |
| YPL253C                                          | VIK1          | YIL103W                 | DPH1          |
| YNL106C                                          | INP52         | YJL006C                 | CTK2          |
| YER122C                                          | GLO3          | YGR188C                 | BUB1          |
| YLR320W                                          | MMS22         | YMR311C                 | GLC8          |
| YDR293C                                          | SSD1          | YML016C                 | PPZ1          |
| YPR120C                                          | CLB5          | YDR289C                 | RTT103        |
| YNR072W                                          | HXT17         | YJR032W                 | CPR7          |
| YMR095C                                          | SNO1          | YDR310C                 | SUM1          |
| YPR029C                                          | APL4          | YJR058C                 | APS2          |
| YFR010W                                          | UBP6          | YHR134W                 | WSS1          |
| YBL078C                                          | ATG8          | YOR106W                 | VAM3          |
| YOR275C                                          | RIM20         | YPR120C                 | CLB5          |
| YOR195W                                          | SLK19         | YIL008W                 | URM1          |
| YDR202C                                          | RAV2          | YHL020C                 | OPI1          |
| YJL151C                                          | SNA3          | YOR284W                 | HUA2          |
| YLR313C                                          | SPH1          | YBL079W                 | NUP170        |
| YMR216C                                          | SKY1          | YPL105C                 | YPL105C       |
| YBR108W                                          | YBR108W       | YBL051C                 | PIN4          |
| YNR052C                                          | POP2          | YNL225C                 | CNM67         |
| YEL053C                                          | MAK10         | YCR053W                 | THR4          |
| YGL124C                                          | MON1          | YOL067C                 | RTG1          |
| YDL101C                                          | DUN1          | YLR135W                 | SLX4          |



| Predictions at threshold level 0.80 continued... |               |                         |               |
|--------------------------------------------------|---------------|-------------------------|---------------|
| Gene1 of predicted pair                          |               | Gene2 of predicted pair |               |
| Systematic Name                                  | Standard Name | Systematic Name         | Standard Name |
| YDR443C                                          | SSN2          | YMR152W                 | YIM1          |
| YNL291C                                          | MID1          | YMR055C                 | BUB2          |
| YNL288W                                          | CAF40         | YHR178W                 | STB5          |
| YOR033C                                          | EXO1          | YDR097C                 | MSH6          |
| YGL147C                                          | RPL9A         | YBL058W                 | SHP1          |
| YMR172W                                          | HOT1          | YMR055C                 | BUB2          |
| YBR057C                                          | MUM2          | YDR254W                 | CHL4          |
| YDR439W                                          | LRS4          | YJR135C                 | MCM22         |
| YJL154C                                          | VPS35         | YOR036W                 | PEP12         |
| YER068W                                          | MOT2          | YNL030W                 | HHF2          |
| YJR099W                                          | YUH1          | YHR108W                 | GGA2          |
| YNL041C                                          | COG6          | YGL003C                 | CDH1          |
| YGL115W                                          | SNF4          | YML071C                 | COG8          |
| YNL058C                                          | YNL058C       | YLR320W                 | MMS22         |
| YDR293C                                          | SSD1          | YER122C                 | GLO3          |
| YGL147C                                          | RPL9A         | YPR036W                 | VMA13         |
| YLR386W                                          | VAC14         | YMR109W                 | MYO5          |
| YKL126W                                          | YPK1          | YLR094C                 | GIS3          |
| YHR060W                                          | VMA22         | YKL119C                 | VPH2          |
| YER161C                                          | SPT2          | YDR073W                 | SNF11         |
| YKL048C                                          | ELM1          | YOL121C                 | RPS19A        |
| YNL291C                                          | MID1          | YGR188C                 | BUB1          |
| YLR320W                                          | MMS22         | YOR066W                 | MSA1          |
| YFR010W                                          | UBP6          | YPL137C                 | GIP3          |
| YNL215W                                          | IES2          | YIL076W                 | SEC28         |
| YLR079W                                          | SIC1          | YLR399C                 | BDF1          |
| YDR385W                                          | EFT2          | YPR119W                 | CLB2          |
| YPL253C                                          | VIK1          | YPR051W                 | MAK3          |
| YJL095W                                          | BCK1          | YGL124C                 | MON1          |

| Predictions at threshold level 0.80 continued... |               |                         |               |
|--------------------------------------------------|---------------|-------------------------|---------------|
| Gene1 of predicted pair                          |               | Gene2 of predicted pair |               |
| Systematic Name                                  | Standard Name | Systematic Name         | Standard Name |
| YIL159W                                          | BNR1          | YBR036C                 | CSG2          |
| YIL076W                                          | SEC28         | YDR378C                 | LSM6          |
| YOR014W                                          | RTS1          | YLR032W                 | RAD5          |
| YNR052C                                          | POP2          | YLR399C                 | BDF1          |
| YPR040W                                          | TIP41         | YGL190C                 | CDC55         |
| YGR014W                                          | MSB2          | YML097C                 | VPS9          |
| YLR399C                                          | BDF1          | YNL307C                 | MCK1          |
| YHR039C-A                                        | VMA10         | YPR046W                 | MCM16         |
| YLR093C                                          | NYV1          | YGL003C                 | CDH1          |
| YAL020C                                          | ATS1          | YHR111W                 | UBA4          |
| YML095C                                          | RAD10         | YBL019W                 | APN2          |
| YNL325C                                          | FIG4          | YGL115W                 | SNF4          |
| YOR132W                                          | VPS17         | YCL001W                 | RER1          |
| YLR360W                                          | VPS38         | YMR004W                 | MVP1          |
| YLR216C                                          | CPR6          | YIL133C                 | RPL16A        |
| YDL184C                                          | RPL41A        | YMR152W                 | YIM1          |
| YMR216C                                          | SKY1          | YML001W                 | YPT7          |
| YMR224C                                          | MRE11         | YDR484W                 | VPS52         |
| YDL184C                                          | RPL41A        | YDR310C                 | SUM1          |
| YDR378C                                          | LSM6          | YHR111W                 | UBA4          |
| YGL212W                                          | VAM7          | YHR200W                 | RPN10         |
| YKL048C                                          | ELM1          | YKL101W                 | HSL1          |
| YKR020W                                          | VPS51         | YLR309C                 | IMH1          |
| YML067C                                          | ERV41         | YEL036C                 | ANP1          |
| YLR371W                                          | ROM2          | YDR207C                 | UME6          |
| YNL248C                                          | RPA49         | YPR046W                 | MCM16         |
| YMR198W                                          | CIK1          | YBR200W                 | BEM1          |
| YBR108W                                          | YBR108W       | YBR200W                 | BEM1          |
| YAL024C                                          | LTE1          | YDR076W                 | RAD55         |

| Predictions at threshold level 0.80 continued... |               |                         |               |
|--------------------------------------------------|---------------|-------------------------|---------------|
| Gene1 of predicted pair                          |               | Gene2 of predicted pair |               |
| Systematic Name                                  | Standard Name | Systematic Name         | Standard Name |
| YLR006C                                          | SSK1          | YPL161C                 | BEM4          |
| YLR144C                                          | ACF2          | YKR030W                 | GMH1          |
| YJL138C                                          | TIF2          | YMR167W                 | MLH1          |
| YOR112W                                          | CEX1          | YKR001C                 | VPS1          |
| YIL053W                                          | RHR2          | YFR010W                 | UBP6          |
| YMR198W                                          | CIK1          | YGR184C                 | UBR1          |
| YML115C                                          | VAN1          | YDR385W                 | EFT2          |
| YKL048C                                          | ELM1          | YNL116W                 | DMA2          |
| YHR205W                                          | SCH9          | YLR200W                 | YKE2          |
| YGL033W                                          | HOP2          | YOL121C                 | RPS19A        |
| YLR360W                                          | VPS38         | YGL115W                 | SNF4          |
| YGR104C                                          | SRB5          | YPR120C                 | CLB5          |
| YMR142C                                          | RPL13B        | YBR108W                 | YBR108W       |
| YBR215W                                          | HPC2          | YDR207C                 | UME6          |
| YLR441C                                          | RPS1A         | YLR370C                 | ARC18         |
| YHR111W                                          | UBA4          | YDR264C                 | AKR1          |
| YNL248C                                          | RPA49         | YPL152W                 | RRD2          |
| YFR036W                                          | CDC26         | YOR035C                 | SHE4          |
| YBR188C                                          | NTC20         | YPR101W                 | SNT309        |
| YKL139W                                          | CTK1          | YMR142C                 | RPL13B        |
| YLR441C                                          | RPS1A         | YCR053W                 | THR4          |
| YBR194W                                          | SOY1          | YPL022W                 | RAD1          |
| YDR358W                                          | GGA1          | YBR036C                 | CSG2          |
| YNL325C                                          | FIG4          | YER122C                 | GLO3          |
| YLR386W                                          | VAC14         | YJR056C                 | YJR056C       |
| YDR080W                                          | VPS41         | YDL226C                 | GCS1          |
| YFL047W                                          | RGD2          | YML057W                 | CMP2          |
| YJL124C                                          | LSM1          | YDL047W                 | SIT4          |
| YML071C                                          | COG8          | YML097C                 | VPS9          |

| Predictions at threshold level 0.80 continued... |               |                         |               |
|--------------------------------------------------|---------------|-------------------------|---------------|
| Gene1 of predicted pair                          |               | Gene2 of predicted pair |               |
| Systematic Name                                  | Standard Name | Systematic Name         | Standard Name |
| YLR095C                                          | IOC2          | YNL032W                 | SIW14         |
| YLR288C                                          | MEC3          | YKL114C                 | APN1          |
| YNL218W                                          | MGS1          | YJR140C                 | HIR3          |
| YLR435W                                          | TSR2          | YGL189C                 | RPS26A        |
| YJL124C                                          | LSM1          | YPR046W                 | MCM16         |
| YKR072C                                          | SIS2          | YMR116C                 | ASC1          |
| YGR261C                                          | APL6          | YOR127W                 | RGA1          |
| YDL006W                                          | PTC1          | YML071C                 | COG8          |
| YJL154C                                          | VPS35         | YER114C                 | BOI2          |
| YJR090C                                          | GRR1          | YLR352W                 | YLR352W       |
| YLR362W                                          | STE11         | YPR119W                 | CLB2          |
| YDR477W                                          | SNF1          | YMR214W                 | SCJ1          |
| YLR360W                                          | VPS38         | YER122C                 | GLO3          |
| YLR452C                                          | SST2          | YOL121C                 | RPS19A        |
| YHR134W                                          | WSS1          | YOR127W                 | RGA1          |
| YFR010W                                          | UBP6          | YDR440W                 | DOT1          |
| YNL054W                                          | VAC7          | YJR063W                 | RPA12         |
| YKL010C                                          | UFD4          | YNL079C                 | TPM1          |
| YBL079W                                          | NUP170        | YPL246C                 | RBD2          |
| YNL291C                                          | MID1          | YGR217W                 | CCH1          |
| YLR170C                                          | APS1          | YDL006W                 | PTC1          |
| YGR129W                                          | SYF2          | YIR009W                 | MSL1          |
| YMR153W                                          | NUP53         | YOR066W                 | MSA1          |
| YGR020C                                          | VMA7          | YHR060W                 | VMA22         |
| YNL291C                                          | MID1          | YDR318W                 | MCM21         |
| YDR179C                                          | CSN9          | YMR025W                 | CSI1          |
| YFR010W                                          | UBP6          | YEL060C                 | PRB1          |
| YMR142C                                          | RPL13B        | YDR261C                 | EXG2          |
| YKL160W                                          | ELF1          | YLR350W                 | ORM2          |

| Predictions at threshold level 0.80 continued... |               |                         |               |
|--------------------------------------------------|---------------|-------------------------|---------------|
| Gene1 of predicted pair                          |               | Gene2 of predicted pair |               |
| Systematic Name                                  | Standard Name | Systematic Name         | Standard Name |
| YPL137C                                          | GIP3          | YMR152W                 | YIM1          |
| YKL048C                                          | ELM1          | YDR028C                 | REG1          |
| YGL100W                                          | SEH1          | YKL057C                 | NUP120        |
| YLR452C                                          | SST2          | YLR370C                 | ARC18         |
| YKL139W                                          | CTK1          | YBL025W                 | RRN10         |
| YDR156W                                          | RPA14         | YPL161C                 | BEM4          |
| YDL002C                                          | NHP10         | YGL148W                 | ARO2          |
| YMR216C                                          | SKY1          | YJR033C                 | RAV1          |
| YGR184C                                          | UBR1          | YML028W                 | TSA1          |
| YDR004W                                          | RAD57         | YLR032W                 | RAD5          |
| YMR026C                                          | PEX12         | YBL025W                 | RRN10         |
| YLR148W                                          | PEP3          | YOR035C                 | SHE4          |
| YKL048C                                          | ELM1          | YDR309C                 | GIC2          |
| YEL053C                                          | MAK10         | YDR358W                 | GGA1          |
| YGL033W                                          | HOP2          | YDR358W                 | GGA1          |
| YGL223C                                          | COG1          | YOR036W                 | PEP12         |
| YKR035W-A                                        | DID2          | YOL121C                 | RPS19A        |
| YMR038C                                          | CCS1          | YLR182W                 | SWI6          |
| YDR101C                                          | ARX1          | YBR031W                 | RPL4A         |
| YBL058W                                          | SHP1          | YGR249W                 | MGA1          |
| YDR216W                                          | ADR1          | YMR280C                 | CAT8          |
| YDL002C                                          | NHP10         | YER122C                 | GLO3          |
| YLR360W                                          | VPS38         | YOR023C                 | AHC1          |
| YBR020W                                          | GAL1          | YML051W                 | GAL80         |
| YDR146C                                          | SWI5          | YER049W                 | TPA1          |
| YMR224C                                          | MRE11         | YLR018C                 | POM34         |
| YMR224C                                          | MRE11         | YCR077C                 | PAT1          |
| YDR260C                                          | SWM1          | YJL095W                 | BCK1          |
| YGR200C                                          | ELP2          | YHR187W                 | IKI1          |

| Predictions at threshold level 0.80 continued... |               |                         |               |
|--------------------------------------------------|---------------|-------------------------|---------------|
| Gene1 of predicted pair                          |               | Gene2 of predicted pair |               |
| Systematic Name                                  | Standard Name | Systematic Name         | Standard Name |
| YNL087W                                          | TCB2          | YGL124C                 | MON1          |
| YOR109W                                          | INP53         | YHL020C                 | OPI1          |
| YPL037C                                          | EGD1          | YER162C                 | RAD4          |
| YDL155W                                          | CLB3          | YJL183W                 | MNN11         |
| YLR079W                                          | SIC1          | YGL163C                 | RAD54         |
| YJR056C                                          | YJR056C       | YNR072W                 | HXT17         |
| YGR261C                                          | APL6          | YOR106W                 | VAM3          |
| YGR072W                                          | UPF3          | YKR030W                 | GMH1          |
| YIL159W                                          | BNR1          | YJL187C                 | SWE1          |
| YJL004C                                          | SYS1          | YMR054W                 | STV1          |
| YGL223C                                          | COG1          | YGL054C                 | ERV14         |
| YPL256C                                          | CLN2          | YOR014W                 | RTS1          |
| YOR358W                                          | HAP5          | YDR144C                 | MKC7          |
| YMR142C                                          | RPL13B        | YPR036W                 | VMA13         |
| YBR228W                                          | SLX1          | YLR313C                 | SPH1          |
| YFR024C-A                                        | LSB3          | YMR192W                 | GYL1          |
| YMR116C                                          | ASC1          | YPL096C-A               | ERI1          |
| YFR031C-A                                        | RPL2A         | YPR036W                 | VMA13         |
| YDR309C                                          | GIC2          | YJL187C                 | SWE1          |
| YLR093C                                          | NYV1          | YMR311C                 | GLC8          |
| YDR477W                                          | SNF1          | YLR425W                 | TUS1          |
| YPL253C                                          | VIK1          | YGL253W                 | HXK2          |
| YBL058W                                          | SHP1          | YMR142C                 | RPL13B        |
| YDR144C                                          | MKC7          | YHR114W                 | BZZ1          |
| YPR018W                                          | RLF2          | YGR184C                 | UBR1          |
| YNL135C                                          | FPR1          | YGL124C                 | MON1          |
| YCR086W                                          | CSM1          | YJL190C                 | RPS22A        |
| YCR077C                                          | PAT1          | YDR289C                 | RTT103        |
| YBR030W                                          | YBR030W       | YDL077C                 | VAM6          |

| Predictions at threshold level 0.80 continued... |               |                         |               |
|--------------------------------------------------|---------------|-------------------------|---------------|
| Gene1 of predicted pair                          |               | Gene2 of predicted pair |               |
| Systematic Name                                  | Standard Name | Systematic Name         | Standard Name |
| YDR174W                                          | HMO1          | YPR119W                 | CLB2          |
| YGR261C                                          | APL6          | YNL107W                 | YAF9          |
| YCR086W                                          | CSM1          | YGL252C                 | RTG2          |
| YPR084W                                          | YPR084W       | YPL042C                 | SSN3          |
| YER162C                                          | RAD4          | YEL051W                 | VMA8          |
| YMR153W                                          | NUP53         | YML057W                 | CMP2          |
| YOR127W                                          | RGA1          | YKR057W                 | RPS21A        |
| YIL008W                                          | URM1          | YDL006W                 | PTC1          |
| YEL065W                                          | SIT1          | YLR119W                 | SRN2          |
| YHR200W                                          | RPN10         | YPL161C                 | BEM4          |
| YNR052C                                          | POP2          | YLR254C                 | NDL1          |
| YFR031C-A                                        | RPL2A         | YML115C                 | VAN1          |
| YER087C-B                                        | SBH1          | YHR200W                 | RPN10         |
| YIL036W                                          | CST6          | YNL107W                 | YAF9          |
| YHR200W                                          | RPN10         | YDR318W                 | MCM21         |
| YFR031C-A                                        | RPL2A         | YJL095W                 | BCK1          |
| YDR484W                                          | VPS52         | YPL057C                 | SUR1          |
| YFL023W                                          | BUD27         | YLR180W                 | SAM1          |
| YBR173C                                          | UMP1          | YHR056C                 | RSC30         |
| YCL001W                                          | RER1          | YNL051W                 | COG5          |
| YJL029C                                          | VPS53         | YOR327C                 | SNC2          |
| YJL006C                                          | CTK2          | YLR370C                 | ARC18         |
| YNL215W                                          | IES2          | YFR036W                 | CDC26         |
| YML115C                                          | VAN1          | YMR152W                 | YIM1          |
| YKR001C                                          | VPS1          | YDR358W                 | GGA1          |
| YDL116W                                          | NUP84         | YPL022W                 | RAD1          |
| YCR020C-A                                        | MAK31         | YGR072W                 | UPF3          |
| YDR004W                                          | RAD57         | YOR014W                 | RTS1          |
| YML115C                                          | VAN1          | YLR131C                 | ACE2          |

| Predictions at threshold level 0.80 continued... |               |                         |               |
|--------------------------------------------------|---------------|-------------------------|---------------|
| Gene1 of predicted pair                          |               | Gene2 of predicted pair |               |
| Systematic Name                                  | Standard Name | Systematic Name         | Standard Name |
| YLR079W                                          | SIC1          | YPR111W                 | DBF20         |
| YOR358W                                          | HAP5          | YPL161C                 | BEM4          |
| YPL137C                                          | GIP3          | YNL076W                 | MKS1          |
| YJR040W                                          | GEF1          | YML071C                 | COG8          |
| YLR386W                                          | VAC14         | YDR254W                 | CHL4          |
| YDR146C                                          | SWI5          | YMR199W                 | CLN1          |
| YDR379W                                          | RGA2          | YKL048C                 | ELM1          |
| YKL048C                                          | ELM1          | YEL056W                 | HAT2          |
| YOR127W                                          | RGA1          | YGR152C                 | RSR1          |
| YBL008W                                          | HIR1          | YLR288C                 | MEC3          |
| YCR066W                                          | RAD18         | YHR039C-A               | VMA10         |
| YLR135W                                          | SLX4          | YOL030W                 | GAS5          |
| YBR200W                                          | BEM1          | YLR362W                 | STE11         |
| YDR080W                                          | VPS41         | YCL037C                 | SRO9          |
| YDL059C                                          | RAD59         | YLR032W                 | RAD5          |
| YDR363W-A                                        | SEM1          | YMR038C                 | CCS1          |
| YBR289W                                          | SNF5          | YER068W                 | MOT2          |
| YNR052C                                          | POP2          | YDR254W                 | CHL4          |
| YPR089W                                          | YPR089W       | YOR275C                 | RIM20         |
| YJL183W                                          | MNN11         | YMR089C                 | YTA12         |
| YCR053W                                          | THR4          | YOL081W                 | IRA2          |
| YNL058C                                          | YNL058C       | YLR398C                 | SKI2          |
| YKL025C                                          | PAN3          | YCR086W                 | CSM1          |
| YGR249W                                          | MGA1          | YLR386W                 | VAC14         |
| YNL238W                                          | KEX2          | YAR014C                 | BUD14         |
| YML095C                                          | RAD10         | YBL047C                 | EDE1          |
| YGL078C                                          | DBP3          | YDR261C                 | EXG2          |
| YHR012W                                          | VPS29         | YGL253W                 | HXK2          |
| YLR386W                                          | VAC14         | YLR182W                 | SWI6          |



| Predictions at threshold level 0.80 continued... |               |                         |               |
|--------------------------------------------------|---------------|-------------------------|---------------|
| Gene1 of predicted pair                          |               | Gene2 of predicted pair |               |
| Systematic Name                                  | Standard Name | Systematic Name         | Standard Name |
| YHL020C                                          | OPI1          | YOL108C                 | INO4          |
| YIL076W                                          | SEC28         | YBR200W                 | BEM1          |
| YNL069C                                          | RPL16B        | YGR261C                 | APL6          |
| YMR116C                                          | ASC1          | YPL089C                 | RLM1          |
| YDR443C                                          | SSN2          | YDL005C                 | MED2          |
| YPL129W                                          | TAF14         | YOR141C                 | ARP8          |
| YAR014C                                          | BUD14         | YAL002W                 | VPS8          |
| YGL212W                                          | VAM7          | YHR039C-A               | VMA10         |
| YOR112W                                          | CEX1          | YJR033C                 | RAV1          |
| YKL116C                                          | PRR1          | YBR200W                 | BEM1          |
| YKL025C                                          | PAN3          | YDR144C                 | MKC7          |
| YGL178W                                          | MPT5          | YBL016W                 | FUS3          |
| YIL076W                                          | SEC28         | YMR142C                 | RPL13B        |
| YAL024C                                          | LTE1          | YJL187C                 | SWE1          |
| YLL039C                                          | UBI4          | YER001W                 | MNN1          |
| YLR119W                                          | SRN2          | YHR200W                 | RPN10         |
| YER162C                                          | RAD4          | YOL108C                 | INO4          |
| YLR320W                                          | MMS22         | YDR207C                 | UME6          |
| YDR176W                                          | NGG1          | YPL129W                 | TAF14         |
| YPL152W                                          | RRD2          | YML112W                 | CTK3          |
| YDR225W                                          | HTA1          | YOR039W                 | CKB2          |
| YDR129C                                          | SAC6          | YLR370C                 | ARC18         |
| YPL152W                                          | RRD2          | YLR315W                 | NKP2          |
| YLR337C                                          | VRP1          | YMR198W                 | CIK1          |
| YDR480W                                          | DIG2          | YPL256C                 | CLN2          |
| YMR071C                                          | TVP18         | YAR014C                 | BUD14         |
| YLR386W                                          | VAC14         | YMR127C                 | SAS2          |
| YGR105W                                          | VMA21         | YNL051W                 | COG5          |
| YDR310C                                          | SUM1          | YJR035W                 | RAD26         |

| Predictions at threshold level 0.80 continued... |               |                         |               |
|--------------------------------------------------|---------------|-------------------------|---------------|
| Gene1 of predicted pair                          |               | Gene2 of predicted pair |               |
| Systematic Name                                  | Standard Name | Systematic Name         | Standard Name |
| YLR386W                                          | VAC14         | YOL145C                 | CTR9          |
| YDR004W                                          | RAD57         | YHR079C-A               | SAE3          |
| YML117W                                          | NAB6          | YMR205C                 | PFK2          |
| YNL238W                                          | KEX2          | YPL137C                 | GIP3          |
| YKL010C                                          | UFD4          | YKL032C                 | IXR1          |
| YLR090W                                          | XDJ1          | YMR016C                 | SOK2          |
| YML117W                                          | NAB6          | YJL117W                 | PHO86         |
| YJL172W                                          | CPS1          | YER040W                 | GLN3          |
| YMR153W                                          | NUP53         | YPR036W                 | VMA13         |
| YKR020W                                          | VPS51         | YGR135W                 | PRE9          |
| YCR034W                                          | FEN1          | YLR350W                 | ORM2          |
| YOR185C                                          | GSP2          | YER110C                 | KAP123        |
| YMR055C                                          | BUB2          | YNL107W                 | YAF9          |
| YBR030W                                          | YBR030W       | YOL111C                 | MDY2          |
| YBR217W                                          | ATG12         | YBL025W                 | RRN10         |
| YPL024W                                          | RMI1          | YKR072C                 | SIS2          |
| YFR031C-A                                        | RPL2A         | YHL020C                 | OPI1          |
| YMR199W                                          | CLN1          | YHR012W                 | VPS29         |
| YER144C                                          | UBP5          | YNL076W                 | MKS1          |
| YHR156C                                          | LIN1          | YKL116C                 | PRR1          |
| YDL106C                                          | PHO2          | YFR034C                 | PHO4          |
| YBR127C                                          | VMA2          | YDL185W                 | TFP1          |
| YCR002C                                          | CDC10         | YHR061C                 | GIC1          |
| YHR156C                                          | LIN1          | YDR137W                 | RGP1          |
| YNL116W                                          | DMA2          | YNL107W                 | YAF9          |
| YOL121C                                          | RPS19A        | YDR310C                 | SUM1          |
| YDL020C                                          | RPN4          | YJL183W                 | MNN11         |
| YNL199C                                          | GCR2          | YJL095W                 | BCK1          |
| YJL036W                                          | SNX4          | YGL223C                 | COG1          |

| Predictions at threshold level 0.80 continued... |               |                         |               |
|--------------------------------------------------|---------------|-------------------------|---------------|
| Gene1 of predicted pair                          |               | Gene2 of predicted pair |               |
| Systematic Name                                  | Standard Name | Systematic Name         | Standard Name |
| YKR099W                                          | BAS1          | YNL307C                 | MCK1          |
| YMR198W                                          | CIK1          | YML028W                 | TSA1          |
| YLR386W                                          | VAC14         | YBR114W                 | RAD16         |
| YDR310C                                          | SUM1          | YNL107W                 | YAF9          |
| YNL215W                                          | IES2          | YGL252C                 | RTG2          |
| YHR119W                                          | SET1          | YLR330W                 | CHS5          |
| YOR038C                                          | HIR2          | YBR036C                 | CSG2          |
| YDR378C                                          | LSM6          | YAL002W                 | VPS8          |
| YMR055C                                          | BUB2          | YLR410W                 | VIP1          |
| YKL025C                                          | PAN3          | YDR310C                 | SUM1          |
| YCR081W                                          | SRB8          | YPL248C                 | GAL4          |
| YBL003C                                          | HTA2          | YNL030W                 | HHF2          |
| YDR261C                                          | EXG2          | YPL137C                 | GIP3          |
| YKR099W                                          | BAS1          | YER044C                 | ERG28         |
| YHL031C                                          | GOS1          | YIR005W                 | IST3          |
| YBR171W                                          | SEC66         | YML012W                 | ERV25         |
| YPL161C                                          | BEM4          | YGR105W                 | VMA21         |
| YNL238W                                          | KEX2          | YDR358W                 | GGA1          |
| YIR002C                                          | MPH1          | YLR234W                 | TOP3          |
| YNL201C                                          | PSY2          | YDR439W                 | LRS4          |
| YJL151C                                          | SNA3          | YKR030W                 | GMH1          |
| YGL212W                                          | VAM7          | YML071C                 | COG8          |
| YPL240C                                          | HSP82         | YGL189C                 | RPS26A        |
| YGR004W                                          | PEX31         | YMR204C                 | INP1          |
| YLR429W                                          | CRN1          | YLR410W                 | VIP1          |
| YJR063W                                          | RPA12         | YOR141C                 | ARP8          |
| YPL050C                                          | MNN9          | YKR020W                 | VPS51         |
| YOR008C                                          | SLG1          | YDR207C                 | UME6          |
| YFL013C                                          | IES1          | YCR077C                 | PAT1          |

| Predictions at threshold level 0.80 continued... |               |                         |               |
|--------------------------------------------------|---------------|-------------------------|---------------|
| Gene1 of predicted pair                          |               | Gene2 of predicted pair |               |
| Systematic Name                                  | Standard Name | Systematic Name         | Standard Name |
| YJL036W                                          | SNX4          | YCL001W                 | RER1          |
| YPL037C                                          | EGD1          | YLR309C                 | IMH1          |
| YJL172W                                          | CPS1          | YER144C                 | UBP5          |
| YDR378C                                          | LSM6          | YLR429W                 | CRN1          |
| YBR108W                                          | YBR108W       | YOL121C                 | RPS19A        |
| YGR261C                                          | APL6          | YGR020C                 | VMA7          |
| YLR119W                                          | SRN2          | YOR290C                 | SNF2          |
| YLR453C                                          | RIF2          | YBR275C                 | RIF1          |
| YLR386W                                          | VAC14         | YNL087W                 | TCB2          |
| YOR066W                                          | MSA1          | YPR030W                 | CSR2          |
| YLR240W                                          | VPS34         | YDR484W                 | VPS52         |
| YFL013C                                          | IES1          | YOR080W                 | DIA2          |
| YGL147C                                          | RPL9A         | YGL078C                 | DBP3          |
| YLR083C                                          | EMP70         | YOL018C                 | TLG2          |
| YPL024W                                          | RMI1          | YDR477W                 | SNF1          |
| YFR031C-A                                        | RPL2A         | YJR084W                 | CSN12         |
| YMR054W                                          | STV1          | YDR207C                 | UME6          |
| YJR090C                                          | GRR1          | YGL253W                 | HXK2          |
| YML115C                                          | VAN1          | YPL137C                 | GIP3          |
| YDR225W                                          | HTA1          | YDL013W                 | SLX5          |
| YER122C                                          | GLO3          | YKL119C                 | VPH2          |
| YLR313C                                          | SPH1          | YJL095W                 | BCK1          |
| YLR435W                                          | TSR2          | YCR031C                 | RPS14A        |
| YOR076C                                          | SKI7          | YHR134W                 | WSS1          |
| YPL037C                                          | EGD1          | YJR033C                 | RAV1          |
| YBR107C                                          | IML3          | YHR114W                 | BZZ1          |
| YML115C                                          | VAN1          | YPL037C                 | EGD1          |
| YPL022W                                          | RAD1          | YBR107C                 | IML3          |
| YNL218W                                          | MGS1          | YCL037C                 | SRO9          |

| Predictions at threshold level 0.80 continued... |               |                         |               |
|--------------------------------------------------|---------------|-------------------------|---------------|
| Gene1 of predicted pair                          |               | Gene2 of predicted pair |               |
| Systematic Name                                  | Standard Name | Systematic Name         | Standard Name |
| YKL129C                                          | MYO3          | YCR088W                 | ABP1          |
| YOL054W                                          | PSH1          | YAR014C                 | BUD14         |
| YLR094C                                          | GIS3          | YDL192W                 | ARF1          |
| YOR275C                                          | RIM20         | YKR020W                 | VPS51         |
| YKR072C                                          | SIS2          | YML028W                 | TSA1          |
| YBR200W                                          | BEM1          | YKR001C                 | VPS1          |
| YNL288W                                          | CAF40         | YJL190C                 | RPS22A        |
| YBR258C                                          | SHG1          | YDR440W                 | DOT1          |
| YFL013C                                          | IES1          | YER161C                 | SPT2          |
| YMR004W                                          | MVP1          | YCL037C                 | SRO9          |
| YDR456W                                          | NHX1          | YBR260C                 | RGD1          |
| YCR077C                                          | PAT1          | YBR036C                 | CSG2          |
| YPR049C                                          | ATG11         | YPR185W                 | ATG13         |
| YPR018W                                          | RLF2          | YNL291C                 | MID1          |
| YLR090W                                          | XDJ1          | YGL033W                 | HOP2          |
| YNL201C                                          | PSY2          | YDR156W                 | RPA14         |
| YDR225W                                          | HTA1          | YDR254W                 | CHL4          |
| YKL007W                                          | CAP1          | YPL161C                 | BEM4          |
| YKR061W                                          | KTR2          | YKL048C                 | ELM1          |
| YHR156C                                          | LIN1          | YHR200W                 | RPN10         |
| YNL243W                                          | SLA2          | YJL115W                 | ASF1          |
| YML115C                                          | VAN1          | YPL057C                 | SUR1          |
| YHR079C                                          | IRE1          | YPL248C                 | GAL4          |
| YML016C                                          | PPZ1          | YLR435W                 | TSR2          |
| YPL161C                                          | BEM4          | YEL043W                 | YEL043W       |
| YDL083C                                          | RPS16B        | YLR093C                 | NYV1          |
| YLR094C                                          | GIS3          | YMR133W                 | REC114        |
| YBL088C                                          | TEL1          | YKL048C                 | ELM1          |
| YHR156C                                          | LIN1          | YLR371W                 | ROM2          |

| Predictions at threshold level 0.80 continued... |               |                         |               |
|--------------------------------------------------|---------------|-------------------------|---------------|
| Gene1 of predicted pair                          |               | Gene2 of predicted pair |               |
| Systematic Name                                  | Standard Name | Systematic Name         | Standard Name |
| YNR052C                                          | POP2          | YFR036W                 | CDC26         |
| YEL050C                                          | RML2          | YMR179W                 | SPT21         |
| YMR224C                                          | MRE11         | YJR063W                 | RPA12         |
| YBR009C                                          | HHF1          | YPR119W                 | CLB2          |
| YLR452C                                          | SST2          | YBL025W                 | RRN10         |
| YPL096C-A                                        | ERI1          | YOR035C                 | SHE4          |
| YNL243W                                          | SLA2          | YEL003W                 | GIM4          |
| YKL160W                                          | ELF1          | YOR038C                 | HIR2          |
| YLR320W                                          | MMS22         | YER040W                 | GLN3          |
| YCR065W                                          | HCM1          | YOR195W                 | SLK19         |
| YBL047C                                          | EDE1          | YNL116W                 | DMA2          |
| YHR200W                                          | RPN10         | YEL053C                 | MAK10         |
| YNL106C                                          | INP52         | YIR009W                 | MSL1          |
| YLR371W                                          | ROM2          | YDL192W                 | ARF1          |
| YGR184C                                          | UBR1          | YPR120C                 | CLB5          |
| YLR292C                                          | SEC72         | YDR183W                 | PLP1          |
| YGR217W                                          | CCH1          | YPL161C                 | BEM4          |
| YLL039C                                          | UBI4          | YPL256C                 | CLN2          |
| YDR137W                                          | RGP1          | YDR261C                 | EXG2          |
| YDR335W                                          | MSN5          | YPL152W                 | RRD2          |
| YNL248C                                          | RPA49         | YKL110C                 | KTI12         |
| YHR111W                                          | UBA4          | YKL110C                 | KTI12         |
| YOR140W                                          | SFL1          | YPL161C                 | BEM4          |
| YKL006W                                          | RPL14A        | YML115C                 | VAN1          |
| YPL024W                                          | RMI1          | YLR093C                 | NYV1          |
| YLR315W                                          | NKP2          | YDR183W                 | PLP1          |
| YML016C                                          | PPZ1          | YOR141C                 | ARP8          |
| YOR332W                                          | VMA4          | YBR127C                 | VMA2          |
| YNL107W                                          | YAF9          | YNL030W                 | HHF2          |

| Predictions at threshold level 0.80 continued... |               |                         |               |
|--------------------------------------------------|---------------|-------------------------|---------------|
| Gene1 of predicted pair                          |               | Gene2 of predicted pair |               |
| Systematic Name                                  | Standard Name | Systematic Name         | Standard Name |
| YPL042C                                          | SSN3          | YLR182W                 | SWI6          |
| YLR371W                                          | ROM2          | YOL121C                 | RPS19A        |
| YMR152W                                          | YIM1          | YOR035C                 | SHE4          |
| YLR410W                                          | VIP1          | YDL155W                 | CLB3          |
| YLR360W                                          | VPS38         | YJR060W                 | CBF1          |
| YOL126C                                          | MDH2          | YNR065C                 | YNR065C       |
| YGL054C                                          | ERV14         | YJL004C                 | SYS1          |
| YGL016W                                          | KAP122        | YGR059W                 | SPR3          |
| YNL206C                                          | RTT106        | YKL048C                 | ELM1          |
| YPR017C                                          | DSS4          | YOR106W                 | VAM3          |
| YPR029C                                          | APL4          | YOR109W                 | INP53         |
| YKL007W                                          | CAP1          | YBR171W                 | SEC66         |
| YLR386W                                          | VAC14         | YNL297C                 | MON2          |
| YHL031C                                          | GOS1          | YDR108W                 | GSG1          |
| YNL058C                                          | YNL058C       | YMR214W                 | SCJ1          |
| YKL048C                                          | ELM1          | YGR135W                 | PRE9          |
| YKL116C                                          | PRR1          | YLR094C                 | GIS3          |
| YDL101C                                          | DUN1          | YLR234W                 | TOP3          |
| YML117W                                          | NAB6          | YBL101C                 | ECM21         |
| YAR014C                                          | BUD14         | YNR032W                 | PPG1          |
| YPL129W                                          | TAF14         | YFR034C                 | PHO4          |
| YMR224C                                          | MRE11         | YKR061W                 | KTR2          |
| YGR020C                                          | VMA7          | YKL080W                 | VMA5          |
| YOR066W                                          | MSA1          | YER122C                 | GLO3          |
| YJR056C                                          | YJR056C       | YLR370C                 | ARC18         |
| YHR178W                                          | STB5          | YDR146C                 | SWI5          |
| YER044C                                          | ERG28         | YHR039C-A               | VMA10         |
| YOR308C                                          | SNU66         | YHR167W                 | THP2          |
| YNL293W                                          | MSB3          | YCR077C                 | PAT1          |

| Predictions at threshold level 0.80 continued... |               |                         |               |
|--------------------------------------------------|---------------|-------------------------|---------------|
| Gene1 of predicted pair                          |               | Gene2 of predicted pair |               |
| Systematic Name                                  | Standard Name | Systematic Name         | Standard Name |
| YLR381W                                          | CTF3          | YDR171W                 | HSP42         |
| YJR056C                                          | YJR056C       | YFR036W                 | CDC26         |
| YBL103C                                          | RTG3          | YLR180W                 | SAM1          |
| YLR386W                                          | VAC14         | YOR275C                 | RIM20         |
| YMR080C                                          | NAM7          | YOR191W                 | RIS1          |
| YDL020C                                          | RPN4          | YBR200W                 | BEM1          |
| YLR093C                                          | NYV1          | YLR370C                 | ARC18         |
| YLR090W                                          | XDJ1          | YER044C                 | ERG28         |
| YOR112W                                          | CEX1          | YJR040W                 | GEF1          |
| YDR108W                                          | GSG1          | YDR318W                 | MCM21         |
| YBL025W                                          | RRN10         | YMR311C                 | GLC8          |
| YLR119W                                          | SRN2          | YMR214W                 | SCJ1          |
| YIL053W                                          | RHR2          | YKL139W                 | CTK1          |
| YDL192W                                          | ARF1          | YCR053W                 | THR4          |
| YBR290W                                          | BSD2          | YLR079W                 | SIC1          |
| YPR084W                                          | YPR084W       | YJL053W                 | PEP8          |
| YJR005W                                          | APL1          | YNL107W                 | YAF9          |
| YGL200C                                          | EMP24         | YDR440W                 | DOT1          |
| YGR184C                                          | UBR1          | YHR200W                 | RPN10         |
| YML115C                                          | VAN1          | YOR368W                 | RAD17         |
| YPL024W                                          | RMI1          | YBR057C                 | MUM2          |
| YKR035W-A                                        | DID2          | YPR173C                 | VPS4          |
| YDR363W-A                                        | SEM1          | YDR310C                 | SUM1          |
| YHL031C                                          | GOS1          | YNL107W                 | YAF9          |
| YNL288W                                          | CAF40         | YJR090C                 | GRR1          |
| YPL018W                                          | CTF19         | YOL081W                 | IRA2          |
| YLR061W                                          | RPL22A        | YBR181C                 | RPS6B         |
| YML115C                                          | VAN1          | YGR020C                 | VMA7          |
| YDR378C                                          | LSM6          | YER139C                 | YER139C       |



| Predictions at threshold level 0.80 continued... |               |                         |               |
|--------------------------------------------------|---------------|-------------------------|---------------|
| Gene1 of predicted pair                          |               | Gene2 of predicted pair |               |
| Systematic Name                                  | Standard Name | Systematic Name         | Standard Name |
| YBR093C                                          | PHO5          | YNR052C                 | POP2          |
| YGR072W                                          | UPF3          | YAL002W                 | VPS8          |
| YGL115W                                          | SNF4          | YER040W                 | GLN3          |
| YOR112W                                          | CEX1          | YCL037C                 | SRO9          |
| YDR477W                                          | SNF1          | YDR245W                 | MNN10         |
| YJR063W                                          | RPA12         | YHR115C                 | DMA1          |
| YKR072C                                          | SIS2          | YPL256C                 | CLN2          |
| YJL095W                                          | BCK1          | YNL076W                 | MKS1          |
| YMR192W                                          | GYL1          | YHR016C                 | YSC84         |
| YPR046W                                          | MCM16         | YBR019C                 | GAL10         |
| YNL068C                                          | FKH2          | YJL095W                 | BCK1          |
| YMR202W                                          | ERG2          | YDL047W                 | SIT4          |
| YPR040W                                          | TIP41         | YNL289W                 | PCL1          |
| YPR036W                                          | VMA13         | YDL223C                 | HBT1          |
| YKL139W                                          | CTK1          | YPL057C                 | SUR1          |
| YEL065W                                          | SIT1          | YJR056C                 | YJR056C       |
| YLR119W                                          | SRN2          | YDR358W                 | GGA1          |
| YKL010C                                          | UFD4          | YJL183W                 | MNN11         |
| YNL069C                                          | RPL16B        | YMR004W                 | MVP1          |
| YHR200W                                          | RPN10         | YPR119W                 | CLB2          |
| YAL051W                                          | OAF1          | YDL127W                 | PCL2          |
| YAL020C                                          | ATS1          | YPL161C                 | BEM4          |
| YML038C                                          | YMD8          | YKR020W                 | VPS51         |
| YGL066W                                          | SGF73         | YGR188C                 | BUB1          |
| YGR270W                                          | YTA7          | YLR254C                 | NDL1          |
| YNL087W                                          | TCB2          | YMR230W                 | RPS10B        |
| YLR079W                                          | SIC1          | YOR001W                 | RRP6          |
| YBR108W                                          | YBR108W       | YNL041C                 | COG6          |
| YLR386W                                          | VAC14         | YNL166C                 | BNI5          |

| Predictions at threshold level 0.80 continued... |               |                         |               |
|--------------------------------------------------|---------------|-------------------------|---------------|
| Gene1 of predicted pair                          |               | Gene2 of predicted pair |               |
| Systematic Name                                  | Standard Name | Systematic Name         | Standard Name |
| YER116C                                          | SLX8          | YLR180W                 | SAM1          |
| YMR198W                                          | CIK1          | YFR040W                 | SAP155        |
| YML071C                                          | COG8          | YEL051W                 | VMA8          |
| YLR386W                                          | VAC14         | YIL103W                 | DPH1          |
| YMR224C                                          | MRE11         | YGR135W                 | PRE9          |
| YGL087C                                          | MMS2          | YGL124C                 | MON1          |
| YDR443C                                          | SSN2          | YPL137C                 | GIP3          |
| YGL237C                                          | HAP2          | YNL297C                 | MON2          |
| YHR200W                                          | RPN10         | YNL041C                 | COG6          |
| YOR127W                                          | RGA1          | YHR061C                 | GIC1          |
| YNL238W                                          | KEX2          | YKL080W                 | VMA5          |
| YGL066W                                          | SGF73         | YOR368W                 | RAD17         |
| YHL031C                                          | GOS1          | YNL044W                 | YIP3          |
| YGR020C                                          | VMA7          | YJL004C                 | SYS1          |
| YLR292C                                          | SEC72         | YIL008W                 | URM1          |
| YPR036W                                          | VMA13         | YGL115W                 | SNF4          |
| YBL078C                                          | ATG8          | YGL223C                 | COG1          |
| YGL223C                                          | COG1          | YKR030W                 | GMH1          |
| YNL325C                                          | FIG4          | YJL172W                 | CPS1          |
| YLR288C                                          | MEC3          | YJL124C                 | LSM1          |
| YGL115W                                          | SNF4          | YEL051W                 | VMA8          |
| YKL025C                                          | PAN3          | YMR055C                 | BUB2          |
| YLR254C                                          | NDL1          | YGR188C                 | BUB1          |
| YPL195W                                          | APL5          | YER139C                 | YER139C       |
| YMR055C                                          | BUB2          | YNL116W                 | DMA2          |
| YJL124C                                          | LSM1          | YLR182W                 | SWI6          |
| YNL218W                                          | MGS1          | YGR071C                 | YGR071C       |
| YMR199W                                          | CLN1          | YOR368W                 | RAD17         |
| YIL076W                                          | SEC28         | YER044C                 | ERG28         |

| Predictions at threshold level 0.80 continued... |               |                         |               |
|--------------------------------------------------|---------------|-------------------------|---------------|
| Gene1 of predicted pair                          |               | Gene2 of predicted pair |               |
| Systematic Name                                  | Standard Name | Systematic Name         | Standard Name |
| YKR020W                                          | VPS51         | YJL187C                 | SWE1          |
| YOR066W                                          | MSA1          | YGL003C                 | CDH1          |
| YER044C                                          | ERG28         | YPR030W                 | CSR2          |
| YDR261C                                          | EXG2          | YOL081W                 | IRA2          |
| YDR448W                                          | ADA2          | YLR182W                 | SWI6          |
| YNL288W                                          | CAF40         | YPR051W                 | MAK3          |
| YML115C                                          | VAN1          | YLR452C                 | SST2          |
| YGL135W                                          | RPL1B         | YDR385W                 | EFT2          |
| YMR198W                                          | CIK1          | YOR001W                 | RRP6          |
| YGL078C                                          | DBP3          | YLR320W                 | MMS22         |
| YMR080C                                          | NAM7          | YDL020C                 | RPN4          |
| YEL053C                                          | MAK10         | YLR093C                 | NYV1          |
| YMR095C                                          | SNO1          | YOL111C                 | MDY2          |
| YDL083C                                          | RPS16B        | YJL183W                 | MNN11         |
| YMR224C                                          | MRE11         | YBR108W                 | YBR108W       |
| YDL006W                                          | PTC1          | YNL079C                 | TPM1          |
| YKL139W                                          | CTK1          | YPL195W                 | APL5          |
| YEL065W                                          | SIT1          | YFL023W                 | BUD27         |
| YHR134W                                          | WSS1          | YGR054W                 | YGR054W       |
| YMR198W                                          | CIK1          | YPR120C                 | CLB5          |
| YLR381W                                          | CTF3          | YLR370C                 | ARC18         |
| YHR200W                                          | RPN10         | YJL095W                 | BCK1          |
| YPR052C                                          | NHP6A         | YOR008C                 | SLG1          |
| YLR447C                                          | VMA6          | YHR039C-A               | VMA10         |
| YEL044W                                          | IES6          | YFR036W                 | CDC26         |
| YKL116C                                          | PRR1          | YML115C                 | VAN1          |
| YPR017C                                          | DSS4          | YLR309C                 | IMH1          |
| YFR010W                                          | UBP6          | YJR135C                 | MCM22         |
| YKR061W                                          | KTR2          | YDR378C                 | LSM6          |

| Predictions at threshold level 0.80 continued... |               |                         |               |
|--------------------------------------------------|---------------|-------------------------|---------------|
| Gene1 of predicted pair                          |               | Gene2 of predicted pair |               |
| Systematic Name                                  | Standard Name | Systematic Name         | Standard Name |
| YNL201C                                          | PSY2          | YNL225C                 | CNM67         |
| YPL161C                                          | BEM4          | YNL293W                 | MSB3          |
| YLR090W                                          | XDJ1          | YJR056C                 | YJR056C       |
| YML095C                                          | RAD10         | YDR171W                 | HSP42         |
| YGL135W                                          | RPL1B         | YOR035C                 | SHE4          |
| YNL032W                                          | SIW14         | YER144C                 | UBP5          |
| YJL124C                                          | LSM1          | YAR014C                 | BUD14         |
| YNL069C                                          | RPL16B        | YER120W                 | SCS2          |
| YBR228W                                          | SLX1          | YDL013W                 | SLX5          |
| YDL020C                                          | RPN4          | YGR071C                 | YGR071C       |
| YPL024W                                          | RMI1          | YHR060W                 | VMA22         |
| YOR270C                                          | VPH1          | YJL172W                 | CPS1          |
| YMR016C                                          | SOK2          | YOR290C                 | SNF2          |
| YDR443C                                          | SSN2          | YBL058W                 | SHP1          |
| YDR477W                                          | SNF1          | YEL060C                 | PRB1          |
| YMR026C                                          | PEX12         | YPL195W                 | APL5          |
| YDL020C                                          | RPN4          | YNL288W                 | CAF40         |
| YFL013C                                          | IES1          | YNL215W                 | IES2          |
| YKL126W                                          | YPK1          | YJL095W                 | BCK1          |
| YPL037C                                          | EGD1          | YKR020W                 | VPS51         |
| YDR097C                                          | MSH6          | YNL307C                 | MCK1          |
| YPL022W                                          | RAD1          | YDL047W                 | SIT4          |
| YNR052C                                          | POP2          | YIR005W                 | IST3          |
| YLR090W                                          | XDJ1          | YNL307C                 | MCK1          |
| YBR108W                                          | YBR108W       | YOR327C                 | SNC2          |
| YKR031C                                          | SPO14         | YFL031W                 | HAC1          |
| YML016C                                          | PPZ1          | YDL226C                 | GCS1          |
| YGL200C                                          | EMP24         | YJL004C                 | SYS1          |
| YDR156W                                          | RPA14         | YBR082C                 | UBC4          |

| Predictions at threshold level 0.80 continued... |               |                         |               |
|--------------------------------------------------|---------------|-------------------------|---------------|
| Gene1 of predicted pair                          |               | Gene2 of predicted pair |               |
| Systematic Name                                  | Standard Name | Systematic Name         | Standard Name |
| YNL166C                                          | BNI5          | YPL161C                 | BEM4          |
| YJR056C                                          | YJR056C       | YOL121C                 | RPS19A        |
| YMR039C                                          | SUB1          | YOL081W                 | IRA2          |
| YER044C                                          | ERG28         | YER122C                 | GLO3          |
| YLR192C                                          | HCR1          | YPR036W                 | VMA13         |
| YNL087W                                          | TCB2          | YPR036W                 | VMA13         |
| YLR288C                                          | MEC3          | YGR188C                 | BUB1          |
| YDR507C                                          | GIN4          | YHR115C                 | DMA1          |
| YPL161C                                          | BEM4          | YHR115C                 | DMA1          |
| YBR264C                                          | YPT10         | YGL198W                 | YIP4          |
| YIR005W                                          | IST3          | YER139C                 | YER139C       |
| YKL110C                                          | KTI12         | YJL006C                 | CTK2          |
| YDR202C                                          | RAV2          | YPR051W                 | MAK3          |
| YJL154C                                          | VPS35         | YOR008C                 | SLG1          |
| YKL213C                                          | DOA1          | YLR350W                 | ORM2          |
| YPL253C                                          | VIK1          | YDL226C                 | GCS1          |
| YKR020W                                          | VPS51         | YDL077C                 | VAM6          |
| YDR484W                                          | VPS52         | YFR036W                 | CDC26         |
| YDL101C                                          | DUN1          | YBR082C                 | UBC4          |
| YJL187C                                          | SWE1          | YJR035W                 | RAD26         |
| YMR198W                                          | CIK1          | YGL200C                 | EMP24         |
| YGR217W                                          | CCH1          | YOR275C                 | RIM20         |
| YMR116C                                          | ASC1          | YLR371W                 | ROM2          |
| YPR046W                                          | MCM16         | YBR280C                 | SAF1          |
| YMR153W                                          | NUP53         | YFL047W                 | RGD2          |
| YGR241C                                          | YAP1802       | YGL095C                 | VPS45         |
| YBR173C                                          | UMP1          | YLR386W                 | VAC14         |
| YHR178W                                          | STB5          | YLR233C                 | EST1          |
| YPL267W                                          | ACM1          | YPL256C                 | CLN2          |

| Predictions at threshold level 0.80 continued... |               |                         |               |
|--------------------------------------------------|---------------|-------------------------|---------------|
| Gene1 of predicted pair                          |               | Gene2 of predicted pair |               |
| Systematic Name                                  | Standard Name | Systematic Name         | Standard Name |
| YGL147C                                          | RPL9A         | YLR094C                 | GIS3          |
| YPR017C                                          | DSS4          | YAL002W                 | VPS8          |
| YDR443C                                          | SSN2          | YBR036C                 | CSG2          |
| YPL234C                                          | TFP3          | YOR035C                 | SHE4          |
| YLL007C                                          | YLL007C       | YMR055C                 | BUB2          |
| YBR173C                                          | UMP1          | YML071C                 | COG8          |
| YBR173C                                          | UMP1          | YDR076W                 | RAD55         |
| YOR127W                                          | RGA1          | YML016C                 | PPZ1          |
| YKR001C                                          | VPS1          | YHR012W                 | VPS29         |
| YBL072C                                          | RPS8A         | YLR425W                 | TUS1          |
| YPR030W                                          | CSR2          | YJR084W                 | CSN12         |
| YOR270C                                          | VPH1          | YDR484W                 | VPS52         |
| YLR433C                                          | CNA1          | YPR101W                 | SNT309        |
| YNL309W                                          | STB1          | YPL256C                 | CLN2          |
| YIL076W                                          | SEC28         | YNL041C                 | COG6          |
| YCR020W-B                                        | HTL1          | YLR357W                 | RSC2          |
| YML115C                                          | VAN1          | YLR371W                 | ROM2          |
| YNL201C                                          | PSY2          | YJL124C                 | LSM1          |
| YJL176C                                          | SWI3          | YAL055W                 | PEX22         |
| YBR127C                                          | VMA2          | YOR327C                 | SNC2          |
| YPL050C                                          | MNN9          | YKR014C                 | YPT52         |
| YCL037C                                          | SRO9          | YNL051W                 | COG5          |
| YDR363W-A                                        | SEM1          | YER118C                 | SHO1          |
| YLR234W                                          | TOP3          | YDR335W                 | MSN5          |
| YOR127W                                          | RGA1          | YNL116W                 | DMA2          |
| YNL087W                                          | TCB2          | YML001W                 | YPT7          |
| YER118C                                          | SHO1          | YKL041W                 | VPS24         |
| YLR288C                                          | MEC3          | YOL081W                 | IRA2          |
| YKL139W                                          | CTK1          | YLR452C                 | SST2          |

| Predictions at threshold level 0.80 continued... |               |                         |               |
|--------------------------------------------------|---------------|-------------------------|---------------|
| Gene1 of predicted pair                          |               | Gene2 of predicted pair |               |
| Systematic Name                                  | Standard Name | Systematic Name         | Standard Name |
| YMR055C                                          | BUB2          | YAL015C                 | NTG1          |
| YMR198W                                          | CIK1          | YBR215W                 | HPC2          |
| YBL008W                                          | HIR1          | YDR448W                 | ADA2          |
| YNL307C                                          | MCK1          | YKL101W                 | HSL1          |
| YER144C                                          | UBP5          | YNR072W                 | HXT17         |
| YEL065W                                          | SIT1          | YPR036W                 | VMA13         |
| YDL116W                                          | NUP84         | YPL018W                 | CTF19         |
| YLR192C                                          | HCR1          | YBR019C                 | GAL10         |
| YBR278W                                          | DPB3          | YPL001W                 | HAT1          |
| YER116C                                          | SLX8          | YOR014W                 | RTS1          |
| YBL102W                                          | SFT2          | YNL041C                 | COG6          |
| YOR069W                                          | VPS5          | YAR014C                 | BUD14         |
| YMR095C                                          | SNO1          | YNL041C                 | COG6          |
| YCR088W                                          | ABP1          | YMR231W                 | PEP5          |
| YPL178W                                          | CBC2          | YKL117W                 | SBA1          |
| YDR108W                                          | GSG1          | YML071C                 | COG8          |
| YDR080W                                          | VPS41         | YER162C                 | RAD4          |
| YLR360W                                          | VPS38         | YLR396C                 | VPS33         |
| YGL147C                                          | RPL9A         | YJL095W                 | BCK1          |
| YOR368W                                          | RAD17         | YLR370C                 | ARC18         |
| YBL008W                                          | HIR1          | YJR135C                 | MCM22         |
| YER162C                                          | RAD4          | YPL195W                 | APL5          |
| YOR337W                                          | TEA1          | YBR108W                 | YBR108W       |
| YLR119W                                          | SRN2          | YKL041W                 | VPS24         |
| YBR194W                                          | SOY1          | YDL002C                 | NHP10         |
| YKL213C                                          | DOA1          | YMR067C                 | UBX4          |
| YLL007C                                          | YLL007C       | YGR188C                 | BUB1          |
| YPL024W                                          | RMI1          | YNL087W                 | TCB2          |
| YDL080C                                          | THI3          | YNL215W                 | IES2          |

| Predictions at threshold level 0.80 continued... |               |                         |               |
|--------------------------------------------------|---------------|-------------------------|---------------|
| Gene1 of predicted pair                          |               | Gene2 of predicted pair |               |
| Systematic Name                                  | Standard Name | Systematic Name         | Standard Name |
| YGR105W                                          | VMA21         | YJL095W                 | BCK1          |
| YNL291C                                          | MID1          | YAL002W                 | VPS8          |
| YOR043W                                          | WHI2          | YKL161C                 | YKL161C       |
| YKL139W                                          | CTK1          | YOL121C                 | RPS19A        |
| YMR095C                                          | SNO1          | YBR173C                 | UMP1          |
| YKL025C                                          | PAN3          | YHR111W                 | UBA4          |
| YLR192C                                          | HCR1          | YHR039C-A               | VMA10         |
| YOR270C                                          | VPH1          | YMR311C                 | GLC8          |
| YFR010W                                          | UBP6          | YGR270W                 | YTA7          |
| YMR198W                                          | CIK1          | YNL206C                 | RTT106        |
| YNL288W                                          | CAF40         | YMR127C                 | SAS2          |
| YNL087W                                          | TCB2          | YHR081W                 | LRP1          |
| YDR507C                                          | GIN4          | YNL289W                 | PCL1          |
| YDL002C                                          | NHP10         | YER161C                 | SPT2          |
| YMR116C                                          | ASC1          | YGL031C                 | RPL24A        |
| YJL053W                                          | PEP8          | YDR080W                 | VPS41         |
| YKL116C                                          | PRR1          | YBL025W                 | RRN10         |
| YGL019W                                          | CKB1          | YOR368W                 | RAD17         |
| YDR156W                                          | RPA14         | YHR013C                 | ARD1          |
| YCR020C-A                                        | MAK31         | YJL036W                 | SNX4          |
| YNR052C                                          | POP2          | YNL054W                 | VAC7          |
| YBL058W                                          | SHP1          | YJR056C                 | YJR056C       |
| YDR080W                                          | VPS41         | YOL108C                 | INO4          |
| YBL025W                                          | RRN10         | YDR207C                 | UME6          |
| YPL120W                                          | VPS30         | YDR153C                 | ENT5          |
| YOR033C                                          | EXO1          | YGR081C                 | SLX9          |
| YNL016W                                          | PUB1          | YDL013W                 | SLX5          |
| YJL154C                                          | VPS35         | YHR060W                 | VMA22         |
| YOL121C                                          | RPS19A        | YLR398C                 | SKI2          |



| Predictions at threshold level 0.80 continued... |               |                         |               |
|--------------------------------------------------|---------------|-------------------------|---------------|
| Gene1 of predicted pair                          |               | Gene2 of predicted pair |               |
| Systematic Name                                  | Standard Name | Systematic Name         | Standard Name |
| YIR005W                                          | IST3          | YOL081W                 | IRA2          |
| YDR477W                                          | SNF1          | YBR280C                 | SAF1          |
| YDR254W                                          | CHL4          | YMR038C                 | CCS1          |
| YAL051W                                          | OAF1          | YKL032C                 | IXR1          |
| YBR171W                                          | SEC66         | YDR261C                 | EXG2          |
| YHR098C                                          | SFB3          | YDR485C                 | VPS72         |
| YLR360W                                          | VPS38         | YHR178W                 | STB5          |
| YNL041C                                          | COG6          | YGL124C                 | MON1          |
| YJL095W                                          | BCK1          | YBL025W                 | RRN10         |
| YER118C                                          | SHO1          | YPR119W                 | CLB2          |
| YML115C                                          | VAN1          | YNL079C                 | TPM1          |
| YGR261C                                          | APL6          | YDR320C                 | SWA2          |
| YGL212W                                          | VAM7          | YPL057C                 | SUR1          |
| YDR179C                                          | CSN9          | YJR084W                 | CSN12         |
| YLR095C                                          | IOC2          | YNL076W                 | MKS1          |
| YER122C                                          | GLO3          | YNL107W                 | YAF9          |
| YGL025C                                          | PGD1          | YGL115W                 | SNF4          |
| YER044C                                          | ERG28         | YBR019C                 | GAL10         |
| YMR026C                                          | PEX12         | YER144C                 | UBP5          |
| YBL078C                                          | ATG8          | YLL042C                 | ATG10         |
| YGR129W                                          | SYF2          | YGR006W                 | PRP18         |
| YOR078W                                          | BUD21         | YER102W                 | RPS8B         |
| YPR084W                                          | YPR084W       | YNL051W                 | COG5          |
| YIL034C                                          | CAP2          | YLR386W                 | VAC14         |
| YDL155W                                          | CLB3          | YFR036W                 | CDC26         |
| YGR105W                                          | VMA21         | YDR153C                 | ENT5          |
| YBR108W                                          | YBR108W       | YDR310C                 | SUM1          |
| YHR200W                                          | RPN10         | YPL248C                 | GAL4          |
| YER144C                                          | UBP5          | YJL183W                 | MNN11         |

| Predictions at threshold level 0.80 continued... |               |                         |               |
|--------------------------------------------------|---------------|-------------------------|---------------|
| Gene1 of predicted pair                          |               | Gene2 of predicted pair |               |
| Systematic Name                                  | Standard Name | Systematic Name         | Standard Name |
| YFR031C-A                                        | RPL2A         | YEL043W                 | YEL043W       |
| YHR178W                                          | STB5          | YPR120C                 | CLB5          |
| YGL033W                                          | HOP2          | YEL060C                 | PRB1          |
| YKR035W-A                                        | DID2          | YDL083C                 | RPS16B        |
| YDR260C                                          | SWM1          | YGR188C                 | BUB1          |
| YBR111W-A                                        | SUS1          | YOR023C                 | AHC1          |
| YDL013W                                          | SLX5          | YOR014W                 | RTS1          |
| YLR083C                                          | EMP70         | YHR012W                 | VPS29         |
| YGL087C                                          | MMS2          | YBL021C                 | HAP3          |
| YJL053W                                          | PEP8          | YEL043W                 | YEL043W       |
| YEL043W                                          | YEL043W       | YPR032W                 | SRO7          |
| YIL034C                                          | CAP2          | YGR152C                 | RSR1          |
| YPL106C                                          | SSE1          | YJR005W                 | APL1          |
| YBL047C                                          | EDE1          | YBR260C                 | RGD1          |
| YMR153W                                          | NUP53         | YOR327C                 | SNC2          |
| YER089C                                          | PTC2          | YDL006W                 | PTC1          |
| YJL095W                                          | BCK1          | YMR038C                 | CCS1          |
| YBL025W                                          | RRN10         | YER122C                 | GLO3          |
| YML095C                                          | RAD10         | YMR231W                 | PEP5          |
| YJR056C                                          | YJR056C       | YNL058C                 | YNL058C       |
| YLR079W                                          | SIC1          | YNL079C                 | TPM1          |
| YDR293C                                          | SSD1          | YDR153C                 | ENT5          |
| YDL059C                                          | RAD59         | YDR076W                 | RAD55         |
| YNL243W                                          | SLA2          | YLR170C                 | APS1          |
| YEL009C                                          | GCN4          | YPL248C                 | GAL4          |
| YLR079W                                          | SIC1          | YKL068W                 | NUP100        |
| YDR244W                                          | PEX5          | YGL205W                 | POX1          |
| YNL166C                                          | BNI5          | YDR183W                 | PLP1          |
| YNL076W                                          | MKS1          | YLR398C                 | SKI2          |

| Predictions at threshold level 0.80 continued... |               |                         |               |
|--------------------------------------------------|---------------|-------------------------|---------------|
| Gene1 of predicted pair                          |               | Gene2 of predicted pair |               |
| Systematic Name                                  | Standard Name | Systematic Name         | Standard Name |
| YHR200W                                          | RPN10         | YDR207C                 | UME6          |
| YHL031C                                          | GOS1          | YKR030W                 | GMH1          |
| YNL032W                                          | SIW14         | YDR261C                 | EXG2          |
| YOR109W                                          | INP53         | YKR030W                 | GMH1          |
| YDR097C                                          | MSH6          | YMR167W                 | MLH1          |
| YPR036W                                          | VMA13         | YBR280C                 | SAF1          |
| YNR052C                                          | POP2          | YLR398C                 | SKI2          |
| YHR081W                                          | LRP1          | YBL025W                 | RRN10         |
| YPL253C                                          | VIK1          | YJR032W                 | CPR7          |
| YPL018W                                          | CTF19         | YOL067C                 | RTG1          |
| YOR270C                                          | VPH1          | YOR290C                 | SNF2          |
| YOR290C                                          | SNF2          | YDR073W                 | SNF11         |
| YLR315W                                          | NKP2          | YFR030W                 | MET10         |
| YML007W                                          | YAP1          | YKL068W                 | NUP100        |
| YPR017C                                          | DSS4          | YGL198W                 | YIP4          |
| YFR031C-A                                        | RPL2A         | YHR200W                 | RPN10         |
| YNL243W                                          | SLA2          | YNL051W                 | COG5          |
| YLR386W                                          | VAC14         | YNL058C                 | YNL058C       |
| YIL159W                                          | BNR1          | YDR484W                 | VPS52         |
| YOR124C                                          | UBP2          | YAL002W                 | VPS8          |
| YMR311C                                          | GLC8          | YOL081W                 | IRA2          |
| YBR278W                                          | DPB3          | YGL148W                 | ARO2          |
| YGR184C                                          | UBR1          | YML051W                 | GAL80         |
| YMR153W                                          | NUP53         | YBR019C                 | GAL10         |
| YMR133W                                          | REC114        | YHR081W                 | LRP1          |
| YDL116W                                          | NUP84         | YBR082C                 | UBC4          |
| YMR008C                                          | PLB1          | YLL061W                 | MMP1          |
| YNL243W                                          | SLA2          | YOR284W                 | HUA2          |
| YAL024C                                          | LTE1          | YPL057C                 | SUR1          |

| Predictions at threshold level 0.80 continued... |               |                         |               |
|--------------------------------------------------|---------------|-------------------------|---------------|
| Gene1 of predicted pair                          |               | Gene2 of predicted pair |               |
| Systematic Name                                  | Standard Name | Systematic Name         | Standard Name |
| YCR066W                                          | RAD18         | YAL002W                 | VPS8          |
| YNL069C                                          | RPL16B        | YGL115W                 | SNF4          |
| YEL013W                                          | VAC8          | YNL107W                 | YAF9          |
| YOR069W                                          | VPS5          | YDR207C                 | UME6          |
| YIL008W                                          | URM1          | YBR114W                 | RAD16         |
| YDL080C                                          | THI3          | YOR308C                 | SNU66         |
| YGL133W                                          | ITC1          | YOR275C                 | RIM20         |
| YDR293C                                          | SSD1          | YGL115W                 | SNF4          |
| YBL103C                                          | RTG3          | YDR261C                 | EXG2          |
| YBR215W                                          | HPC2          | YKL213C                 | DOA1          |
| YOL145C                                          | CTR9          | YKR048C                 | NAP1          |
| YMR224C                                          | MRE11         | YBR215W                 | HPC2          |
| YDR358W                                          | GGA1          | YOR327C                 | SNC2          |
| YOL145C                                          | CTR9          | YLR357W                 | RSC2          |
| YGL115W                                          | SNF4          | YMR133W                 | REC114        |
| YDR443C                                          | SSN2          | YOL111C                 | MDY2          |
| YEL053C                                          | MAK10         | YLR398C                 | SKI2          |
| YDR225W                                          | HTA1          | YOR014W                 | RTS1          |
| YCR066W                                          | RAD18         | YEL043W                 | YEL043W       |
| YJR040W                                          | GEF1          | YNL127W                 | FAR11         |
| YER001W                                          | MNN1          | YDR245W                 | MNN10         |
| YOL136C                                          | PFK27         | YLR309C                 | IMH1          |
| YBR217W                                          | ATG12         | YDL192W                 | ARF1          |
| YBR171W                                          | SEC66         | YGL003C                 | CDH1          |
| YEL065W                                          | SIT1          | YMR224C                 | MRE11         |
| YCR053W                                          | THR4          | YDR310C                 | SUM1          |
| YJR033C                                          | RAV1          | YDR153C                 | ENT5          |
| YNR032W                                          | PPG1          | YDR207C                 | UME6          |
| YJR060W                                          | CBF1          | YKL114C                 | APN1          |

| Predictions at threshold level 0.80 continued... |               |                         |               |
|--------------------------------------------------|---------------|-------------------------|---------------|
| Gene1 of predicted pair                          |               | Gene2 of predicted pair |               |
| Systematic Name                                  | Standard Name | Systematic Name         | Standard Name |
| YHR156C                                          | LIN1          | YDL077C                 | VAM6          |
| YNL106C                                          | INP52         | YOR243C                 | PUS7          |
| YHR073W                                          | OSH3          | YIL156W                 | UBP7          |
| YPL195W                                          | APL5          | YER122C                 | GLO3          |
| YNL117W                                          | MLS1          | YDR260C                 | SWM1          |
| YLR399C                                          | BDF1          | YGL200C                 | EMP24         |
| YDR254W                                          | CHL4          | YFR036W                 | CDC26         |
| YMR116C                                          | ASC1          | YBL072C                 | RPS8A         |
| YHL025W                                          | SNF6          | YKL109W                 | HAP4          |
| YLR360W                                          | VPS38         | YHL020C                 | OPI1          |
| YPL057C                                          | SUR1          | YOR066W                 | MSA1          |
| YDR318W                                          | MCM21         | YOL091W                 | SPO21         |
| YBL088C                                          | TEL1          | YPL022W                 | RAD1          |
| YOR132W                                          | VPS17         | YKL135C                 | APL2          |
| YLR441C                                          | RPS1A         | YJR056C                 | YJR056C       |
| YGL033W                                          | HOP2          | YLR320W                 | MMS22         |
| YLR095C                                          | IOC2          | YMR016C                 | SOK2          |
| YHR073W                                          | OSH3          | YER110C                 | KAP123        |
| YBR290W                                          | BSD2          | YGR270W                 | YTA7          |
| YCR081W                                          | SRB8          | YNL199C                 | GCR2          |
| YBR194W                                          | SOY1          | YKL139W                 | CTK1          |
| YGL175C                                          | SAE2          | YGL031C                 | RPL24A        |
| YDR174W                                          | HMO1          | YGR188C                 | BUB1          |
| YJL053W                                          | PEP8          | YOR069W                 | VPS5          |
| YIL002C                                          | INP51         | YDL192W                 | ARF1          |
| YCR034W                                          | FEN1          | YLR288C                 | MEC3          |
| YIL034C                                          | CAP2          | YOR035C                 | SHE4          |
| YOR337W                                          | TEA1          | YJR032W                 | CPR7          |
| YOR275C                                          | RIM20         | YNL116W                 | DMA2          |

| Predictions at threshold level 0.80 continued... |               |                         |               |
|--------------------------------------------------|---------------|-------------------------|---------------|
| Gene1 of predicted pair                          |               | Gene2 of predicted pair |               |
| Systematic Name                                  | Standard Name | Systematic Name         | Standard Name |
| YKL048C                                          | ELM1          | YLR254C                 | NDL1          |
| YHR134W                                          | WSS1          | YBR073W                 | RDH54         |
| YIL159W                                          | BNR1          | YDR477W                 | SNF1          |
| YBR217W                                          | ATG12         | YBL103C                 | RTG3          |
| YGR261C                                          | APL6          | YIL076W                 | SEC28         |
| YNL199C                                          | GCR2          | YEL036C                 | ANP1          |
| YHR134W                                          | WSS1          | YBR082C                 | UBC4          |
| YDR202C                                          | RAV2          | YDR310C                 | SUM1          |
| YDR477W                                          | SNF1          | YOR066W                 | MSA1          |
| YPR084W                                          | YPR084W       | YER120W                 | SCS2          |
| YHR031C                                          | RRM3          | YHR056C                 | RSC30         |
| YER162C                                          | RAD4          | YMR214W                 | SCJ1          |
| YPL042C                                          | SSN3          | YCL037C                 | SRO9          |
| YGL087C                                          | MMS2          | YOL067C                 | RTG1          |
| YBL051C                                          | PIN4          | YDR144C                 | MKC7          |
| YDR101C                                          | ARX1          | YKL009W                 | MRT4          |
| YNL139C                                          | RLR1          | YHR167W                 | THP2          |
| YBR280C                                          | SAF1          | YMR214W                 | SCJ1          |
| YPL024W                                          | RMI1          | YMR311C                 | GLC8          |
| YNL325C                                          | FIG4          | YFR036W                 | CDC26         |
| YOL121C                                          | RPS19A        | YOL081W                 | IRA2          |
| YNL106C                                          | INP52         | YML112W                 | CTK3          |
| YOR080W                                          | DIA2          | YKL213C                 | DOA1          |
| YKL139W                                          | CTK1          | YGL003C                 | CDH1          |
| YGL025C                                          | PGD1          | YDL192W                 | ARF1          |
| YFL023W                                          | BUD27         | YNL041C                 | COG6          |
| YBR200W                                          | BEM1          | YGL124C                 | MON1          |
| YOR368W                                          | RAD17         | YLR182W                 | SWI6          |
| YGL174W                                          | BUD13         | YLR315W                 | NKP2          |

| Predictions at threshold level 0.80 continued... |               |                         |               |
|--------------------------------------------------|---------------|-------------------------|---------------|
| Gene1 of predicted pair                          |               | Gene2 of predicted pair |               |
| Systematic Name                                  | Standard Name | Systematic Name         | Standard Name |
| YFR031C-A                                        | RPL2A         | YAR014C                 | BUD14         |
| YMR224C                                          | MRE11         | YER139C                 | YER139C       |
| YJR059W                                          | PTK2          | YOR358W                 | HAP5          |
| YDL020C                                          | RPN4          | YDL047W                 | SIT4          |
| YBR114W                                          | RAD16         | YAL002W                 | VPS8          |
| YBL058W                                          | SHP1          | YKR035W-A               | DID2          |
| YBR112C                                          | CYC8          | YPL248C                 | GAL4          |
| YEL009C                                          | GCN4          | YGR252W                 | GCN5          |
| YOR358W                                          | HAP5          | YKL068W                 | NUP100        |
| YDR129C                                          | SAC6          | YKR014C                 | YPT52         |
| YBR030W                                          | YBR030W       | YOR035C                 | SHE4          |
| YOR112W                                          | CEX1          | YOR069W                 | VPS5          |
| YBL047C                                          | EDE1          | YBL067C                 | UBP13         |
| YPR051W                                          | MAK3          | YJR033C                 | RAV1          |
| YJL004C                                          | SYS1          | YPL195W                 | APL5          |
| YOR337W                                          | TEA1          | YOR327C                 | SNC2          |
| YNL094W                                          | APP1          | YBR133C                 | HSL7          |
| YFR031C-A                                        | RPL2A         | YIL076W                 | SEC28         |
| YDR174W                                          | HMO1          | YLR399C                 | BDF1          |
| YER162C                                          | RAD4          | YML071C                 | COG8          |
| YBR173C                                          | UMP1          | YIL076W                 | SEC28         |
| YNR052C                                          | POP2          | YPL203W                 | TPK2          |
| YML115C                                          | VAN1          | YPL213W                 | LEA1          |
| YLR192C                                          | HCR1          | YEL053C                 | MAK10         |
| YMR016C                                          | SOK2          | YDL192W                 | ARF1          |
| YOL145C                                          | CTR9          | YLR182W                 | SWI6          |
| YGL226C-A                                        | OST5          | YMR214W                 | SCJ1          |
| YNL079C                                          | TPM1          | YMR089C                 | YTA12         |
| YLR292C                                          | SEC72         | YJL183W                 | MNN11         |

| Predictions at threshold level 0.80 continued... |               |                         |               |
|--------------------------------------------------|---------------|-------------------------|---------------|
| Gene1 of predicted pair                          |               | Gene2 of predicted pair |               |
| Systematic Name                                  | Standard Name | Systematic Name         | Standard Name |
| YGR268C                                          | HUA1          | YPL246C                 | RBD2          |
| YLR192C                                          | HCR1          | YPR046W                 | MCM16         |
| YBR084C-A                                        | RPL19A        | YDL047W                 | SIT4          |
| YMR116C                                          | ASC1          | YNL329C                 | PEX6          |
| YJL140W                                          | RPB4          | YLR357W                 | RSC2          |
| YDL184C                                          | RPL41A        | YMR311C                 | GLC8          |
| YER110C                                          | KAP123        | YJL095W                 | BCK1          |
| YDR320C                                          | SWA2          | YDR202C                 | RAV2          |
| YNL236W                                          | SIN4          | YJR035W                 | RAD26         |
| YNL025C                                          | SSN8          | YOR308C                 | SNU66         |
| YLR381W                                          | CTF3          | YMR109W                 | MYO5          |
| YPR120C                                          | CLB5          | YPL256C                 | CLN2          |
| YKR061W                                          | KTR2          | YHR115C                 | DMA1          |
| YLL007C                                          | YLL007C       | YBR107C                 | IML3          |
| YBR171W                                          | SEC66         | YER139C                 | YER139C       |
| YHR039C-A                                        | VMA10         | YDR310C                 | SUM1          |
| YBL047C                                          | EDE1          | YJR084W                 | CSN12         |
| YNL229C                                          | URE2          | YKR048C                 | NAP1          |
| YBR200W                                          | BEM1          | YDR358W                 | GGA1          |
| YBR194W                                          | SOY1          | YNL297C                 | MON2          |
| YNL297C                                          | MON2          | YLR447C                 | VMA6          |
| YMR004W                                          | MVP1          | YCR066W                 | RAD18         |
| YBR112C                                          | CYC8          | YBL103C                 | RTG3          |
| YPL042C                                          | SSN3          | YPL018W                 | CTF19         |
| YML016C                                          | PPZ1          | YNL236W                 | SIN4          |
| YDR443C                                          | SSN2          | YER040W                 | GLN3          |
| YDR335W                                          | MSN5          | YJR135C                 | MCM22         |
| YMR095C                                          | SNO1          | YMR214W                 | SCJ1          |
| YDR439W                                          | LRS4          | YMR055C                 | BUB2          |



| Predictions at threshold level 0.80 continued... |               |                         |               |
|--------------------------------------------------|---------------|-------------------------|---------------|
| Gene1 of predicted pair                          |               | Gene2 of predicted pair |               |
| Systematic Name                                  | Standard Name | Systematic Name         | Standard Name |
| YCR088W                                          | ABP1          | YOR036W                 | PEP12         |
| YMR205C                                          | PFK2          | YMR038C                 | CCS1          |
| YPR084W                                          | YPR084W       | YHR167W                 | THP2          |
| YER139C                                          | YER139C       | YBR036C                 | CSG2          |
| YDR289C                                          | RTT103        | YAR014C                 | BUD14         |
| YDL002C                                          | NHP10         | YIR005W                 | IST3          |
| YBR200W                                          | BEM1          | YAL002W                 | VPS8          |
| YOR195W                                          | SLK19         | YKL048C                 | ELM1          |
| YOR191W                                          | RIS1          | YPL024W                 | RMI1          |
| YML001W                                          | YPT7          | YKR014C                 | YPT52         |
| YIL053W                                          | RHR2          | YLR180W                 | SAM1          |
| YOR112W                                          | CEX1          | YAR014C                 | BUD14         |
| YDR129C                                          | SAC6          | YBR260C                 | RGD1          |
| YIL156W                                          | UBP7          | YMR153W                 | NUP53         |
| YJR084W                                          | CSN12         | YMR311C                 | GLC8          |
| YLR083C                                          | EMP70         | YPL161C                 | BEM4          |
| YBR228W                                          | SLX1          | YPL057C                 | SUR1          |
| YBR042C                                          | CST26         | YML115C                 | VAN1          |
| YML115C                                          | VAN1          | YBR108W                 | YBR108W       |
| YNL087W                                          | TCB2          | YNL058C                 | YNL058C       |
| YLR447C                                          | VMA6          | YHR114W                 | BZZ1          |
| YPL032C                                          | SVL3          | YLR429W                 | CRN1          |
| YJR084W                                          | CSN12         | YBR082C                 | UBC4          |
| YPL253C                                          | VIK1          | YEL053C                 | MAK10         |
| YNL068C                                          | FKH2          | YPR120C                 | CLB5          |
| YPL161C                                          | BEM4          | YLR452C                 | SST2          |
| YIL036W                                          | CST6          | YER118C                 | SHO1          |
| YOR112W                                          | CEX1          | YNL051W                 | COG5          |
| YEL065W                                          | SIT1          | YNL076W                 | MKS1          |

| Predictions at threshold level 0.80 continued... |               |                         |               |
|--------------------------------------------------|---------------|-------------------------|---------------|
| Gene1 of predicted pair                          |               | Gene2 of predicted pair |               |
| Systematic Name                                  | Standard Name | Systematic Name         | Standard Name |
| YLR192C                                          | HCR1          | YMR152W                 | YIM1          |
| YHR039C-A                                        | VMA10         | YOL081W                 | IRA2          |
| YPL037C                                          | EGD1          | YLR093C                 | NYV1          |
| YDR225W                                          | HTA1          | YGR188C                 | BUB1          |
| YCR081W                                          | SRB8          | YDR456W                 | NHX1          |
| YBL058W                                          | SHP1          | YLR452C                 | SST2          |
| YFR031C-A                                        | RPL2A         | YJR056C                 | YJR056C       |
| YNL325C                                          | FIG4          | YBR171W                 | SEC66         |
| YBL103C                                          | RTG3          | YFR021W                 | ATG18         |
| YPR084W                                          | YPR084W       | YNL215W                 | IES2          |
| YBR108W                                          | YBR108W       | YBR239C                 | YBR239C       |
| YLR119W                                          | SRN2          | YHR156C                 | LIN1          |
| YKR061W                                          | KTR2          | YDR183W                 | PLP1          |
| YER116C                                          | SLX8          | YPR120C                 | CLB5          |
| YJR032W                                          | CPR7          | YMR230W                 | RPS10B        |
| YDR155C                                          | CPR1          | YDR183W                 | PLP1          |
| YMR133W                                          | REC114        | YLR093C                 | NYV1          |
| YHR039C-A                                        | VMA10         | YBR019C                 | GAL10         |
| YGR184C                                          | UBR1          | YLR150W                 | STM1          |
| YNL069C                                          | RPL16B        | YAR014C                 | BUD14         |
| YNL293W                                          | MSB3          | YAL030W                 | SNC1          |
| YML016C                                          | PPZ1          | YLR233C                 | EST1          |
| YFR031C-A                                        | RPL2A         | YBL102W                 | SFT2          |
| YNL044W                                          | YIP3          | YMR054W                 | STV1          |
| YPL042C                                          | SSN3          | YDR378C                 | LSM6          |
| YHR134W                                          | WSS1          | YOR243C                 | PUS7          |
| YEL022W                                          | GEA2          | YKR030W                 | GMH1          |
| YGR105W                                          | VMA21         | YNL127W                 | FAR11         |
| YEL043W                                          | YEL043W       | YNL238W                 | KEX2          |

| Predictions at threshold level 0.80 continued... |               |                         |               |
|--------------------------------------------------|---------------|-------------------------|---------------|
| Gene1 of predicted pair                          |               | Gene2 of predicted pair |               |
| Systematic Name                                  | Standard Name | Systematic Name         | Standard Name |
| YKL126W                                          | YPK1          | YDR310C                 | SUM1          |
| YGL003C                                          | CDH1          | YHR115C                 | DMA1          |
| YBR200W                                          | BEM1          | YJR032W                 | CPR7          |
| YDR004W                                          | RAD57         | YDL002C                 | NHP10         |
| YPL213W                                          | LEA1          | YLR370C                 | ARC18         |
| YDR146C                                          | SWI5          | YPL248C                 | GAL4          |
| YOR106W                                          | VAM3          | YJR032W                 | CPR7          |
| YDR176W                                          | NGG1          | YDL005C                 | MED2          |
| YBR131W                                          | CCZ1          | YDR137W                 | RGP1          |
| YOR358W                                          | HAP5          | YNL199C                 | GCR2          |
| YDR004W                                          | RAD57         | YLR394W                 | CST9          |
| YOR375C                                          | GDH1          | YKL041W                 | VPS24         |
| YMR116C                                          | ASC1          | YLR370C                 | ARC18         |
| YMR133W                                          | REC114        | YJR084W                 | CSN12         |
| YOR083W                                          | WHI5          | YJR060W                 | CBF1          |
| YGR019W                                          | UGA1          | YAL002W                 | VPS8          |
| YHL031C                                          | GOS1          | YDR153C                 | ENT5          |
| YPR102C                                          | RPL11A        | YPL240C                 | HSP82         |
| YLR095C                                          | IOC2          | YER116C                 | SLX8          |
| YBR173C                                          | UMP1          | YPR046W                 | MCM16         |
| YLR386W                                          | VAC14         | YML071C                 | COG8          |
| YGL253W                                          | HXK2          | YHL002W                 | HSE1          |
| YIL036W                                          | CST6          | YDR254W                 | CHL4          |
| YLR079W                                          | SIC1          | YJL127C                 | SPT10         |
| YJR140C                                          | HIR3          | YOR001W                 | RRP6          |
| YNL079C                                          | TPM1          | YJL095W                 | BCK1          |
| YMR216C                                          | SKY1          | YPL161C                 | BEM4          |
| YLR399C                                          | BDF1          | YDR335W                 | MSN5          |
| YOL018C                                          | TLG2          | YOL108C                 | INO4          |

| Predictions at threshold level 0.80 continued... |               |                         |               |
|--------------------------------------------------|---------------|-------------------------|---------------|
| Gene1 of predicted pair                          |               | Gene2 of predicted pair |               |
| Systematic Name                                  | Standard Name | Systematic Name         | Standard Name |
| YMR026C                                          | PEX12         | YBR171W                 | SEC66         |
| YNL215W                                          | IES2          | YLR315W                 | NKP2          |
| YNL215W                                          | IES2          | YIL103W                 | DPH1          |
| YOR337W                                          | TEA1          | YJL172W                 | CPS1          |
| YHR111W                                          | UBA4          | YLR410W                 | VIP1          |
| YDR484W                                          | VPS52         | YLR396C                 | VPS33         |
| YPL161C                                          | BEM4          | YJR135C                 | MCM22         |
| YPR036W                                          | VMA13         | YPL195W                 | APL5          |
| YDR335W                                          | MSN5          | YGL252C                 | RTG2          |
| YHR205W                                          | SCH9          | YNL079C                 | TPM1          |
| YBR171W                                          | SEC66         | YML001W                 | YPT7          |
| YKL006W                                          | RPL14A        | YNL079C                 | TPM1          |
| YER161C                                          | SPT2          | YEL013W                 | VAC8          |
| YHR171W                                          | ATG7          | YMR159C                 | ATG16         |
| YGR184C                                          | UBR1          | YPL057C                 | SUR1          |
| YHR060W                                          | VMA22         | YMR054W                 | STV1          |
| YHR161C                                          | YAP1801       | YKR020W                 | VPS51         |
| YNL069C                                          | RPL16B        | YPL161C                 | BEM4          |
| YNL054W                                          | VAC7          | YDR439W                 | LRS4          |
| YLR095C                                          | IOC2          | YMR152W                 | YIM1          |
| YFL023W                                          | BUD27         | YMR214W                 | SCJ1          |
| YNL238W                                          | KEX2          | YOL018C                 | TLG2          |
| YKL213C                                          | DOA1          | YJL048C                 | UBX6          |
| YNL238W                                          | KEX2          | YAL002W                 | VPS8          |
| YGR081C                                          | SLX9          | YER116C                 | SLX8          |
| YOR080W                                          | DIA2          | YOR141C                 | ARP8          |
| YML095C                                          | RAD10         | YDR264C                 | AKR1          |
| YBR200W                                          | BEM1          | YOR023C                 | AHC1          |
| YDR108W                                          | GSG1          | YEL053C                 | MAK10         |

| Predictions at threshold level 0.80 continued... |               |                         |               |
|--------------------------------------------------|---------------|-------------------------|---------------|
| Gene1 of predicted pair                          |               | Gene2 of predicted pair |               |
| Systematic Name                                  | Standard Name | Systematic Name         | Standard Name |
| YDR129C                                          | SAC6          | YLR360W                 | VPS38         |
| YJL053W                                          | PEP8          | YNL297C                 | MON2          |
| YGL223C                                          | COG1          | YMR054W                 | STV1          |
| YDR176W                                          | NGG1          | YBR111W-A               | SUS1          |
| YDR245W                                          | MNN10         | YBL047C                 | EDE1          |
| YIL159W                                          | BNR1          | YOR066W                 | MSA1          |
| YLR452C                                          | SST2          | YLR180W                 | SAM1          |
| YMR004W                                          | MVP1          | YLR447C                 | VMA6          |
| YPL024W                                          | RMI1          | YNR072W                 | HXT17         |
| YPR066W                                          | UBA3          | YLR306W                 | UBC12         |
| YHR200W                                          | RPN10         | YOR035C                 | SHE4          |
| YDL065C                                          | PEX19         | YNL214W                 | PEX17         |
| YDR004W                                          | RAD57         | YMR179W                 | SPT21         |
| YMR214W                                          | SCJ1          | YOL081W                 | IRA2          |
| YDR443C                                          | SSN2          | YML115C                 | VAN1          |
| YNL058C                                          | YNL058C       | YDL083C                 | RPS16B        |
| YDR156W                                          | RPA14         | YGR270W                 | YTA7          |
| YOL030W                                          | GAS5          | YGL175C                 | SAE2          |
| YDL020C                                          | RPN4          | YDL160C                 | DHH1          |
| YML095C                                          | RAD10         | YNL107W                 | YAF9          |
| YHL031C                                          | GOS1          | YAR014C                 | BUD14         |
| YMR127C                                          | SAS2          | YBR171W                 | SEC66         |
| YDR179C                                          | CSN9          | YDL216C                 | RRI1          |
| YNL044W                                          | YIP3          | YKR014C                 | YPT52         |
| YIL008W                                          | URM1          | YPL256C                 | CLN2          |
| YGL033W                                          | HOP2          | YMR311C                 | GLC8          |
| YJL058C                                          | BIT61         | YGL003C                 | CDH1          |
| YJL036W                                          | SNX4          | YEL053C                 | MAK10         |
| YLR095C                                          | IOC2          | YPL195W                 | APL5          |

| Predictions at threshold level 0.80 continued... |               |                         |               |
|--------------------------------------------------|---------------|-------------------------|---------------|
| Gene1 of predicted pair                          |               | Gene2 of predicted pair |               |
| Systematic Name                                  | Standard Name | Systematic Name         | Standard Name |
| YGR261C                                          | APL6          | YGL054C                 | ERV14         |
| YKL048C                                          | ELM1          | YDR207C                 | UME6          |
| YLR119W                                          | SRN2          | YBL058W                 | SHP1          |
| YCL037C                                          | SRO9          | YHR012W                 | VPS29         |
| YGR261C                                          | APL6          | YDR080W                 | VPS41         |
| YHL031C                                          | GOS1          | YLR315W                 | NKP2          |
| YGL133W                                          | ITC1          | YLR386W                 | VAC14         |
| YNL307C                                          | MCK1          | YOL081W                 | IRA2          |
| YDR358W                                          | GGA1          | YPL259C                 | APM1          |
| YDR293C                                          | SSD1          | YPL120W                 | VPS30         |
| YDR395W                                          | SXM1          | YBR017C                 | KAP104        |
| YMR095C                                          | SNO1          | YIL076W                 | SEC28         |
| YDR192C                                          | NUP42         | YML109W                 | ZDS2          |
| YNL206C                                          | RTT106        | YBR119W                 | MUD1          |
| YGR104C                                          | SRB5          | YNL079C                 | TPM1          |
| YMR127C                                          | SAS2          | YCR086W                 | CSM1          |
| YGR241C                                          | YAP1802       | YHR108W                 | GGA2          |
| YFR031C-A                                        | RPL2A         | YKL048C                 | ELM1          |
| YMR172W                                          | HOT1          | YNL107W                 | YAF9          |
| YNR072W                                          | HXT17         | YOL081W                 | IRA2          |
| YDR156W                                          | RPA14         | YBR107C                 | IML3          |
| YBL021C                                          | HAP3          | YEL056W                 | HAT2          |
| YAR014C                                          | BUD14         | YHR115C                 | DMA1          |
| YMR039C                                          | SUB1          | YDR289C                 | RTT103        |
| YDR469W                                          | SDC1          | YPL018W                 | CTF19         |
| YPL115C                                          | BEM3          | YDR318W                 | MCM21         |
| YLR090W                                          | XDJ1          | YPR036W                 | VMA13         |
| YMR153W                                          | NUP53         | YPR046W                 | MCM16         |
| YLR313C                                          | SPH1          | YDL159W                 | STE7          |

| Predictions at threshold level 0.80 continued... |               |                         |               |
|--------------------------------------------------|---------------|-------------------------|---------------|
| Gene1 of predicted pair                          |               | Gene2 of predicted pair |               |
| Systematic Name                                  | Standard Name | Systematic Name         | Standard Name |
| YGL025C                                          | PGD1          | YHR081W                 | LRP1          |
| YOL121C                                          | RPS19A        | YER040W                 | GLN3          |
| YDR261C                                          | EXG2          | YGL124C                 | MON1          |
| YLR410W                                          | VIP1          | YNL238W                 | KEX2          |
| YBR036C                                          | CSG2          | YDR207C                 | UME6          |
| YJL124C                                          | LSM1          | YBR082C                 | UBC4          |
| YML115C                                          | VAN1          | YPL050C                 | MNN9          |
| YFR031C-A                                        | RPL2A         | YMR152W                 | YIM1          |
| YBR108W                                          | YBR108W       | YGL212W                 | VAM7          |
| YLR381W                                          | CTF3          | YHR200W                 | RPN10         |
| YLR093C                                          | NYV1          | YBR280C                 | SAF1          |
| YKL006W                                          | RPL14A        | YDR378C                 | LSM6          |
| YHR200W                                          | RPN10         | YLR320W                 | MMS22         |
| YEL050C                                          | RML2          | YOL091W                 | SPO21         |
| YMR026C                                          | PEX12         | YLR398C                 | SKI2          |
| YPL137C                                          | GIP3          | YLR093C                 | NYV1          |
| YHR178W                                          | STB5          | YBR171W                 | SEC66         |
| YNR052C                                          | POP2          | YOR141C                 | ARP8          |
| YLR386W                                          | VAC14         | YLR398C                 | SKI2          |
| YNL021W                                          | HDA1          | YCR084C                 | TUP1          |
| YPR084W                                          | YPR084W       | YJL036W                 | SNX4          |
| YBR041W                                          | FAT1          | YKL094W                 | YJU3          |
| YGL212W                                          | VAM7          | YNR072W                 | HXT17         |
| YDL155W                                          | CLB3          | YDR144C                 | MKC7          |
| YDR129C                                          | SAC6          | YHR161C                 | YAP1801       |
| YGL147C                                          | RPL9A         | YML071C                 | COG8          |
| YHL020C                                          | OPI1          | YJL004C                 | SYS1          |
| YGL212W                                          | VAM7          | YGR105W                 | VMA21         |
| YMR127C                                          | SAS2          | YDR254W                 | CHL4          |

| Predictions at threshold level 0.80 continued... |               |                         |               |
|--------------------------------------------------|---------------|-------------------------|---------------|
| Gene1 of predicted pair                          |               | Gene2 of predicted pair |               |
| Systematic Name                                  | Standard Name | Systematic Name         | Standard Name |
| YER044C                                          | ERG28         | YBR280C                 | SAF1          |
| YDR137W                                          | RGP1          | YBR019C                 | GAL10         |
| YNL106C                                          | INP52         | YLR182W                 | SWI6          |
| YCR065W                                          | HCM1          | YDL185W                 | TFP1          |
| YER001W                                          | MNN1          | YKR020W                 | VPS51         |
| YJL154C                                          | VPS35         | YMR311C                 | GLC8          |
| YBR290W                                          | BSD2          | YPL256C                 | CLN2          |
| YCR066W                                          | RAD18         | YAR014C                 | BUD14         |
| YMR224C                                          | MRE11         | YHL002W                 | HSE1          |
| YBL025W                                          | RRN10         | YLR370C                 | ARC18         |
| YOR358W                                          | HAP5          | YHL002W                 | HSE1          |
| YOR337W                                          | TEA1          | YML001W                 | YPT7          |
| YKR057W                                          | RPS21A        | YHR152W                 | SPO12         |
| YJR060W                                          | CBF1          | YOL091W                 | SPO21         |
| YMR192W                                          | GYL1          | YLR144C                 | ACF2          |
| YJL036W                                          | SNX4          | YNL051W                 | COG5          |
| YPL105C                                          | YPL105C       | YPL195W                 | APL5          |
| YBL008W                                          | HIR1          | YBR289W                 | SNF5          |
| YLR079W                                          | SIC1          | YPL106C                 | SSE1          |
| YNL218W                                          | MGS1          | YPL079W                 | RPL21B        |
| YLR292C                                          | SEC72         | YDR254W                 | CHL4          |
| YPL152W                                          | RRD2          | YDL047W                 | SIT4          |
| YDR137W                                          | RGP1          | YLR182W                 | SWI6          |
| YMR116C                                          | ASC1          | YOL090W                 | MSH2          |
| YER120W                                          | SCS2          | YNL127W                 | FAR11         |
| YOR270C                                          | VPH1          | YER144C                 | UBP5          |
| YLR234W                                          | TOP3          | YOL067C                 | RTG1          |
| YLR207W                                          | HRD3          | YMR022W                 | UBC7          |
| YLR447C                                          | VMA6          | YNL041C                 | COG6          |



| Predictions at threshold level 0.80 continued... |               |                         |               |
|--------------------------------------------------|---------------|-------------------------|---------------|
| Gene1 of predicted pair                          |               | Gene2 of predicted pair |               |
| Systematic Name                                  | Standard Name | Systematic Name         | Standard Name |
| YJR032W                                          | CPR7          | YMR167W                 | MLH1          |
| YNL106C                                          | INP52         | YIL036W                 | CST6          |
| YBL008W                                          | HIR1          | YLR399C                 | BDF1          |
| YBR200W                                          | BEM1          | YKR035W-A               | DID2          |
| YBR200W                                          | BEM1          | YBR041W                 | FAT1          |
| YMR016C                                          | SOK2          | YMR214W                 | SCJ1          |
| YNL106C                                          | INP52         | YLR219W                 | MSC3          |
| YLR381W                                          | CTF3          | YGR188C                 | BUB1          |
| YML103C                                          | NUP188        | YJL006C                 | CTK2          |
| YDR225W                                          | HTA1          | YML028W                 | TSA1          |
| YDR129C                                          | SAC6          | YNL079C                 | TPM1          |
| YCR066W                                          | RAD18         | YML001W                 | YPT7          |
| YGR108W                                          | CLB1          | YNL236W                 | SIN4          |
| YKL110C                                          | KTI12         | YDL047W                 | SIT4          |
| YLR292C                                          | SEC72         | YNL288W                 | CAF40         |
| YBL047C                                          | EDE1          | YDR207C                 | UME6          |
| YAL024C                                          | LTE1          | YDL077C                 | VAM6          |
| YPR017C                                          | DSS4          | YNL297C                 | MON2          |
| YOR290C                                          | SNF2          | YBR009C                 | HHF1          |
| YNL297C                                          | MON2          | YKR001C                 | VPS1          |
| YOL111C                                          | MDY2          | YHR200W                 | RPN10         |
| YKL048C                                          | ELM1          | YOL067C                 | RTG1          |
| YLR090W                                          | XDJ1          | YDR261C                 | EXG2          |
| YMR142C                                          | RPL13B        | YDL083C                 | RPS16B        |
| YMR095C                                          | SNO1          | YHR156C                 | LIN1          |
| YER110C                                          | KAP123        | YKL068W                 | NUP100        |
| YGL033W                                          | HOP2          | YGL183C                 | MND1          |
| YAL024C                                          | LTE1          | YBR200W                 | BEM1          |
| YOR290C                                          | SNF2          | YOR066W                 | MSA1          |

| Predictions at threshold level 0.80 continued... |               |                         |               |
|--------------------------------------------------|---------------|-------------------------|---------------|
| Gene1 of predicted pair                          |               | Gene2 of predicted pair |               |
| Systematic Name                                  | Standard Name | Systematic Name         | Standard Name |
| YFR010W                                          | UBP6          | YHL030W                 | ECM29         |
| YBR127C                                          | VMA2          | YPL045W                 | VPS16         |
| YMR273C                                          | ZDS1          | YNL030W                 | HHF2          |
| YAL024C                                          | LTE1          | YGR184C                 | UBR1          |
| YPL129W                                          | TAF14         | YOL051W                 | GAL11         |
| YGL087C                                          | MMS2          | YJL095W                 | BCK1          |
| YDL020C                                          | RPN4          | YLR352W                 | YLR352W       |
| YML103C                                          | NUP188        | YIL148W                 | RPL40A        |
| YIL076W                                          | SEC28         | YOR127W                 | RGA1          |
| YDR440W                                          | DOT1          | YLR350W                 | ORM2          |
| YJR063W                                          | RPA12         | YDR289C                 | RTT103        |
| YLR360W                                          | VPS38         | YOR127W                 | RGA1          |
| YLR090W                                          | XDJ1          | YER139C                 | YER139C       |
| YBR017C                                          | KAP104        | YKR082W                 | NUP133        |
| YMR152W                                          | YIM1          | YER040W                 | GLN3          |
| YNL288W                                          | CAF40         | YMR055C                 | BUB2          |
| YOL108C                                          | INO4          | YAL002W                 | VPS8          |
| YGL147C                                          | RPL9A         | YNL087W                 | TCB2          |
| YDR245W                                          | MNN10         | YGR135W                 | PRE9          |
| YJL036W                                          | SNX4          | YER120W                 | SCS2          |
| YER116C                                          | SLX8          | YML095C                 | RAD10         |
| YPR036W                                          | VMA13         | YDR358W                 | GGA1          |
| YPL057C                                          | SUR1          | YPL079W                 | RPL21B        |
| YBR270C                                          | BIT2          | YNL047C                 | SLM2          |
| YIL053W                                          | RHR2          | YJR056C                 | YJR056C       |
| YOR195W                                          | SLK19         | YHR013C                 | ARD1          |
| YNL025C                                          | SSN8          | YBR194W                 | SOY1          |
| YDL020C                                          | RPN4          | YML028W                 | TSA1          |
| YNL044W                                          | YIP3          | YHR012W                 | VPS29         |

| Predictions at threshold level 0.80 continued... |               |                         |               |
|--------------------------------------------------|---------------|-------------------------|---------------|
| Gene1 of predicted pair                          |               | Gene2 of predicted pair |               |
| Systematic Name                                  | Standard Name | Systematic Name         | Standard Name |
| YPL178W                                          | CBC2          | YGL016W                 | KAP122        |
| YPL018W                                          | CTF19         | YKL101W                 | HSL1          |
| YBR182C                                          | SMP1          | YPL089C                 | RLM1          |
| YDR156W                                          | RPA14         | YGL163C                 | RAD54         |
| YJL095W                                          | BCK1          | YGL019W                 | CKB1          |
| YER114C                                          | BOI2          | YGR152C                 | RSR1          |
| YML102W                                          | CAC2          | YML028W                 | TSA1          |
| YDR443C                                          | SSN2          | YHR156C                 | LIN1          |
| YDL155W                                          | CLB3          | YGR135W                 | PRE9          |
| YOR112W                                          | CEX1          | YER162C                 | RAD4          |
| YEL044W                                          | IES6          | YGL200C                 | EMP24         |
| YBL103C                                          | RTG3          | YLR398C                 | SKI2          |
| YJR024C                                          | MDE1          | YKL117W                 | SBA1          |
| YBR108W                                          | YBR108W       | YDR358W                 | GGA1          |
| YOR127W                                          | RGA1          | YPL195W                 | APL5          |
| YNL297C                                          | MON2          | YJR032W                 | CPR7          |
| YOR112W                                          | CEX1          | YKR020W                 | VPS51         |
| YLR360W                                          | VPS38         | YBR128C                 | ATG14         |
| YBL008W                                          | HIR1          | YER161C                 | SPT2          |
| YFL023W                                          | BUD27         | YMR231W                 | PEP5          |
| YDR448W                                          | ADA2          | YOR023C                 | AHC1          |
| YGR159C                                          | NSR1          | YJL095W                 | BCK1          |
| YNL297C                                          | MON2          | YFL033C                 | RIM15         |
| YLR386W                                          | VAC14         | YBL103C                 | RTG3          |
| YPL057C                                          | SUR1          | YBR215W                 | HPC2          |
| YPR018W                                          | RLF2          | YBR009C                 | HHF1          |
| YGR249W                                          | MGA1          | YPR030W                 | CSR2          |
| YGL115W                                          | SNF4          | YGL003C                 | CDH1          |
| YER115C                                          | SPR6          | YPL246C                 | RBD2          |

| Predictions at threshold level 0.80 continued... |               |                         |               |
|--------------------------------------------------|---------------|-------------------------|---------------|
| Gene1 of predicted pair                          |               | Gene2 of predicted pair |               |
| Systematic Name                                  | Standard Name | Systematic Name         | Standard Name |
| YPL129W                                          | TAF14         | YBR010W                 | HHT1          |
| YIL036W                                          | CST6          | YBR200W                 | BEM1          |
| YKL116C                                          | PRR1          | YHR081W                 | LRP1          |
| YDR254W                                          | CHL4          | YJL190C                 | RPS22A        |
| YER173W                                          | RAD24         | YHR079C-A               | SAE3          |
| YHR161C                                          | YAP1801       | YMR231W                 | PEP5          |
| YKL213C                                          | DOA1          | YDR310C                 | SUM1          |
| YJL154C                                          | VPS35         | YPR046W                 | MCM16         |
| YPR084W                                          | YPR084W       | YIL076W                 | SEC28         |
| YBL103C                                          | RTG3          | YPL137C                 | GIP3          |
| YMR109W                                          | MYO5          | YMR032W                 | HOF1          |
| YOL145C                                          | CTR9          | YDL005C                 | MED2          |
| YAL024C                                          | LTE1          | YLR288C                 | MEC3          |
| YPL240C                                          | HSP82         | YGL095C                 | VPS45         |
| YLR079W                                          | SIC1          | YMR311C                 | GLC8          |
| YHR200W                                          | RPN10         | YLR094C                 | GIS3          |
| YMR179W                                          | SPT21         | YOR001W                 | RRP6          |
| YPL152W                                          | RRD2          | YDR289C                 | RTT103        |
| YDL116W                                          | NUP84         | YLR399C                 | BDF1          |
| YIL159W                                          | BNR1          | YIL076W                 | SEC28         |
| YGR054W                                          | YGR054W       | YPL018W                 | CTF19         |
| YPL161C                                          | BEM4          | YGL031C                 | RPL24A        |
| YBL008W                                          | HIR1          | YBR009C                 | HHF1          |
| YJL172W                                          | CPS1          | YGL025C                 | PGD1          |
| YHR156C                                          | LIN1          | YMR152W                 | YIM1          |
| YHR152W                                          | SPO12         | YGL163C                 | RAD54         |
| YOR054C                                          | VHS3          | YDL047W                 | SIT4          |
| YLR234W                                          | TOP3          | YDR144C                 | MKC7          |
| YLR386W                                          | VAC14         | YOL054W                 | PSH1          |

| Predictions at threshold level 0.80 continued... |               |                         |               |
|--------------------------------------------------|---------------|-------------------------|---------------|
| Gene1 of predicted pair                          |               | Gene2 of predicted pair |               |
| Systematic Name                                  | Standard Name | Systematic Name         | Standard Name |
| YOL145C                                          | CTR9          | YDR363W-A               | SEM1          |
| YLR360W                                          | VPS38         | YDR320C                 | SWA2          |
| YBL008W                                          | HIR1          | YPL024W                 | RMI1          |
| YDR103W                                          | STE5          | YBR083W                 | TEC1          |
| YFR036W                                          | CDC26         | YDR183W                 | PLP1          |
| YBL079W                                          | NUP170        | YMR038C                 | CCS1          |
| YGR019W                                          | UGA1          | YJR135C                 | MCM22         |
| YDL223C                                          | HBT1          | YGL003C                 | CDH1          |
| YDR225W                                          | HTA1          | YER116C                 | SLX8          |
| YPL158C                                          | YPL158C       | YKL161C                 | YKL161C       |
| YBL103C                                          | RTG3          | YHR060W                 | VMA22         |
| YGL033W                                          | HOP2          | YML071C                 | COG8          |
| YDR004W                                          | RAD57         | YMR167W                 | MLH1          |
| YMR205C                                          | PFK2          | YLR320W                 | MMS22         |
| YPL024W                                          | RMI1          | YJL172W                 | CPS1          |
| YEL051W                                          | VMA8          | YDR310C                 | SUM1          |
| YPL042C                                          | SSN3          | YLR429W                 | CRN1          |
| YJL154C                                          | VPS35         | YDR323C                 | PEP7          |
| YIL036W                                          | CST6          | YLR182W                 | SWI6          |
| YBR200W                                          | BEM1          | YJL183W                 | MNN11         |
| YBL051C                                          | PIN4          | YBR107C                 | IML3          |
| YPL022W                                          | RAD1          | YDR076W                 | RAD55         |
| YLR061W                                          | RPL22A        | YML097C                 | VPS9          |
| YKL116C                                          | PRR1          | YKL139W                 | CTK1          |
| YMR026C                                          | PEX12         | YLR386W                 | VAC14         |
| YPL050C                                          | MNN9          | YML012W                 | ERV25         |
| YBR195C                                          | MSI1          | YLR370C                 | ARC18         |
| YLR320W                                          | MMS22         | YPL195W                 | APL5          |
| YJL154C                                          | VPS35         | YPL105C                 | YPL105C       |

| Predictions at threshold level 0.80 continued... |               |                         |               |
|--------------------------------------------------|---------------|-------------------------|---------------|
| Gene1 of predicted pair                          |               | Gene2 of predicted pair |               |
| Systematic Name                                  | Standard Name | Systematic Name         | Standard Name |
| YDR320C                                          | SWA2          | YPL120W                 | VPS30         |
| YAL024C                                          | LTE1          | YLR094C                 | GIS3          |
| YDR484W                                          | VPS52         | YKL126W                 | YPK1          |
| YHR178W                                          | STB5          | YOR308C                 | SNU66         |
| YLR337C                                          | VRP1          | YHL027W                 | RIM101        |
| YMR055C                                          | BUB2          | YJR090C                 | GRR1          |
| YPL057C                                          | SUR1          | YMR230W                 | RPS10B        |
| YIL103W                                          | DPH1          | YOR141C                 | ARP8          |
| YBR258C                                          | SHG1          | YNL297C                 | MON2          |
| YDR320C                                          | SWA2          | YPR032W                 | SRO7          |
| YOR127W                                          | RGA1          | YGL163C                 | RAD54         |
| YHR205W                                          | SCH9          | YDR245W                 | MNN10         |
| YDR383C                                          | NKP1          | YNL225C                 | CNM67         |
| YIL034C                                          | CAP2          | YGR054W                 | YGR054W       |
| YPL161C                                          | BEM4          | YEL036C                 | ANP1          |
| YPL037C                                          | EGD1          | YOR035C                 | SHE4          |
| YHR178W                                          | STB5          | YBR195C                 | MSI1          |
| YOR043W                                          | WHI2          | YHR108W                 | GGA2          |
| YHR111W                                          | UBA4          | YDL155W                 | CLB3          |
| YGR270W                                          | YTA7          | YGL124C                 | MON1          |
| YGL147C                                          | RPL9A         | YFR036W                 | CDC26         |
| YGL200C                                          | EMP24         | YOR375C                 | GDH1          |
| YNL293W                                          | MSB3          | YPR028W                 | YOP1          |
| YPR084W                                          | YPR084W       | YDR293C                 | SSD1          |
| YGL115W                                          | SNF4          | YNL236W                 | SIN4          |
| YKL139W                                          | CTK1          | YNL004W                 | HRB1          |
| YGL212W                                          | VAM7          | YGL025C                 | PGD1          |
| YNL225C                                          | CNM67         | YGL252C                 | RTG2          |
| YNL106C                                          | INP52         | YKR020W                 | VPS51         |

| Predictions at threshold level 0.80 continued... |               |                         |               |
|--------------------------------------------------|---------------|-------------------------|---------------|
| Gene1 of predicted pair                          |               | Gene2 of predicted pair |               |
| Systematic Name                                  | Standard Name | Systematic Name         | Standard Name |
| YLR090W                                          | XDJ1          | YNL041C                 | COG6          |
| YGR104C                                          | SRB5          | YOR001W                 | RRP6          |
| YDL127W                                          | PCL2          | YDR310C                 | SUM1          |
| YGL212W                                          | VAM7          | YEL051W                 | VMA8          |
| YBR173C                                          | UMP1          | YNL325C                 | FIG4          |
| YMR164C                                          | MSS11         | YBL079W                 | NUP170        |
| YGL147C                                          | RPL9A         | YDL077C                 | VAM6          |
| YNL187W                                          | YNL187W       | YDR515W                 | SLF1          |
| YHR178W                                          | STB5          | YDR289C                 | RTT103        |
| YFR010W                                          | UBP6          | YOR308C                 | SNU66         |
| YJL176C                                          | SWI3          | YGR071C                 | YGR071C       |
| YDR389W                                          | SAC7          | YLR120C                 | YPS1          |
| YDR254W                                          | CHL4          | YPR046W                 | MCM16         |
| YHR167W                                          | THP2          | YER063W                 | THO1          |
| YEL065W                                          | SIT1          | YBR173C                 | UMP1          |
| YLR234W                                          | TOP3          | YPR120C                 | CLB5          |
| YDR443C                                          | SSN2          | YLR320W                 | MMS22         |
| YGL223C                                          | COG1          | YER120W                 | SCS2          |
| YPR018W                                          | RLF2          | YGL066W                 | SGF73         |
| YDR484W                                          | VPS52         | YMR231W                 | PEP5          |
| YGR019W                                          | UGA1          | YNL166C                 | BNI5          |
| YLR182W                                          | SWI6          | YHR115C                 | DMA1          |
| YML103C                                          | NUP188        | YJR063W                 | RPA12         |
| YIL053W                                          | RHR2          | YPL161C                 | BEM4          |
| YKR061W                                          | KTR2          | YJR063W                 | RPA12         |
| YIL076W                                          | SEC28         | YGL054C                 | ERV14         |
| YHR010W                                          | RPL27A        | YIL133C                 | RPL16A        |
| YKL048C                                          | ELM1          | YNL041C                 | COG6          |
| YJR135C                                          | MCM22         | YOR308C                 | SNU66         |

| Predictions at threshold level 0.80 continued... |               |                         |               |
|--------------------------------------------------|---------------|-------------------------|---------------|
| Gene1 of predicted pair                          |               | Gene2 of predicted pair |               |
| Systematic Name                                  | Standard Name | Systematic Name         | Standard Name |
| YBR112C                                          | CYC8          | YLR176C                 | RFX1          |
| YLR447C                                          | VMA6          | YHR012W                 | VPS29         |
| YGL163C                                          | RAD54         | YDR264C                 | AKR1          |
| YJL127C                                          | SPT10         | YOL091W                 | SPO21         |
| YPR072W                                          | NOT5          | YOL148C                 | SPT20         |
| YIL076W                                          | SEC28         | YOL121C                 | RPS19A        |
| YGR019W                                          | UGA1          | YER110C                 | KAP123        |
| YPL267W                                          | ACM1          | YDL155W                 | CLB3          |
| YMR224C                                          | MRE11         | YDR440W                 | DOT1          |
| YDR192C                                          | NUP42         | YKL068W                 | NUP100        |
| YPL024W                                          | RMI1          | YOR243C                 | PUS7          |
| YLR018C                                          | POM34         | YLR234W                 | TOP3          |
| YBR108W                                          | YBR108W       | YCR053W                 | THR4          |
| YKR072C                                          | SIS2          | YMR231W                 | PEP5          |
| YDR261C                                          | EXG2          | YLR093C                 | NYV1          |
| YNL116W                                          | DMA2          | YOL054W                 | PSH1          |
| YFR036W                                          | CDC26         | YMR230W                 | RPS10B        |
| YDR318W                                          | MCM21         | YDR076W                 | RAD55         |
| YMR116C                                          | ASC1          | YPL022W                 | RAD1          |
| YOR132W                                          | VPS17         | YNL297C                 | MON2          |
| YML001W                                          | YPT7          | YER040W                 | GLN3          |
| YOR038C                                          | HIR2          | YBR010W                 | HHT1          |
| YDR156W                                          | RPA14         | YLR320W                 | MMS22         |
| YML095C                                          | RAD10         | YHL002W                 | HSE1          |
| YLR061W                                          | RPL22A        | YDR129C                 | SAC6          |
| YKR020W                                          | VPS51         | YPL195W                 | APL5          |
| YPL129W                                          | TAF14         | YEL013W                 | VAC8          |
| YPL024W                                          | RMI1          | YPL037C                 | EGD1          |
| YBR200W                                          | BEM1          | YMR205C                 | PFK2          |



| Predictions at threshold level 0.80 continued... |               |                         |               |
|--------------------------------------------------|---------------|-------------------------|---------------|
| Gene1 of predicted pair                          |               | Gene2 of predicted pair |               |
| Systematic Name                                  | Standard Name | Systematic Name         | Standard Name |
| YPR052C                                          | NHP6A         | YGL094C                 | PAN2          |
| YDL184C                                          | RPL41A        | YLR370C                 | ARC18         |
| YDR385W                                          | EFT2          | YGR105W                 | VMA21         |
| YDR477W                                          | SNF1          | YBR030W                 | YBR030W       |
| YGR019W                                          | UGA1          | YJL190C                 | RPS22A        |
| YKR020W                                          | VPS51         | YJL183W                 | MNN11         |
| YML028W                                          | TSA1          | YKR030W                 | GMH1          |
| YHR079C                                          | IRE1          | YBR111W-A               | SUS1          |
| YFR040W                                          | SAP155        | YMR052W                 | FAR3          |
| YHL031C                                          | GOS1          | YOR109W                 | INP53         |
| YDL052C                                          | SLC1          | YKR046C                 | PET10         |
| YPL125W                                          | KAP120        | YBR017C                 | KAP104        |
| YOL111C                                          | MDY2          | YBL025W                 | RRN10         |
| YDR443C                                          | SSN2          | YPR030W                 | CSR2          |
| YJR135C                                          | MCM22         | YAL002W                 | VPS8          |
| YPL106C                                          | SSE1          | YJR135C                 | MCM22         |
| YDR142C                                          | PEX7          | YAR042W                 | SWH1          |
| YCR081W                                          | SRB8          | YDR207C                 | UME6          |
| YPL042C                                          | SSN3          | YNL215W                 | IES2          |
| YGL175C                                          | SAE2          | YHR010W                 | RPL27A        |
| YGL190C                                          | CDC55         | YKR082W                 | NUP133        |
| YGR188C                                          | BUB1          | YLR032W                 | RAD5          |
| YPR036W                                          | VMA13         | YDR310C                 | SUM1          |
| YNL106C                                          | INP52         | YPL253C                 | VIK1          |
| YMR216C                                          | SKY1          | YEL043W                 | YEL043W       |
| YGL066W                                          | SGF73         | YCL010C                 | SGF29         |
| YGL078C                                          | DBP3          | YJR032W                 | CPR7          |
| YNL215W                                          | IES2          | YNL116W                 | DMA2          |
| YCL001W                                          | RER1          | YOL018C                 | TLG2          |

| Predictions at threshold level 0.80 continued... |               |                         |               |
|--------------------------------------------------|---------------|-------------------------|---------------|
| Gene1 of predicted pair                          |               | Gene2 of predicted pair |               |
| Systematic Name                                  | Standard Name | Systematic Name         | Standard Name |
| YFR031C-A                                        | RPL2A         | YOR337W                 | TEA1          |
| YNL166C                                          | BNI5          | YDR254W                 | CHL4          |
| YMR142C                                          | RPL13B        | YGL025C                 | PGD1          |
| YBL021C                                          | HAP3          | YJL095W                 | BCK1          |
| YPL018W                                          | CTF19         | YJL190C                 | RPS22A        |
| YOR337W                                          | TEA1          | YER122C                 | GLO3          |
| YML095C                                          | RAD10         | YMR038C                 | CCS1          |
| YKL006W                                          | RPL14A        | YDR129C                 | SAC6          |
| YKL181W                                          | PRS1          | YER099C                 | PRS2          |
| YBR084C-A                                        | RPL19A        | YNL229C                 | URE2          |
| YOR112W                                          | CEX1          | YGL115W                 | SNF4          |
| YPL256C                                          | CLN2          | YKR024C                 | DBP7          |
| YOR080W                                          | DIA2          | YML016C                 | PPZ1          |
| YDR318W                                          | MCM21         | YML028W                 | TSA1          |
| YDL155W                                          | CLB3          | YDL047W                 | SIT4          |
| YGR270W                                          | YTA7          | YPL152W                 | RRD2          |
| YLR094C                                          | GIS3          | YOL121C                 | RPS19A        |
| YKL007W                                          | CAP1          | YGR080W                 | TWF1          |
| YER120W                                          | SCS2          | YER122C                 | GLO3          |
| YDR293C                                          | SSD1          | YDL006W                 | PTC1          |
| YER161C                                          | SPT2          | YPR120C                 | CLB5          |
| YNL248C                                          | RPA49         | YLR410W                 | VIP1          |
| YNL325C                                          | FIG4          | YJL183W                 | MNN11         |
| YHR216W                                          | IMD2          | YPL240C                 | HSP82         |
| YMR224C                                          | MRE11         | YLR452C                 | SST2          |
| YGL174W                                          | BUD13         | YDR318W                 | MCM21         |
| YDR265W                                          | PEX10         | YAL055W                 | PEX22         |
| YNL297C                                          | MON2          | YEL042W                 | GDA1          |
| YIL159W                                          | BNR1          | YPL057C                 | SUR1          |

| Predictions at threshold level 0.80 continued... |               |                         |               |
|--------------------------------------------------|---------------|-------------------------|---------------|
| Gene1 of predicted pair                          |               | Gene2 of predicted pair |               |
| Systematic Name                                  | Standard Name | Systematic Name         | Standard Name |
| YBL008W                                          | HIR1          | YGL151W                 | NUT1          |
| YJL073W                                          | JEM1          | YOR085W                 | OST3          |
| YGL212W                                          | VAM7          | YHR081W                 | LRP1          |
| YLR234W                                          | TOP3          | YEL053C                 | MAK10         |
| YPL161C                                          | BEM4          | YPR032W                 | SRO7          |
| YCR002C                                          | CDC10         | YJL095W                 | BCK1          |
| YOR106W                                          | VAM3          | YOL108C                 | INO4          |
| YBL103C                                          | RTG3          | YML001W                 | YPT7          |
| YNL307C                                          | MCK1          | YDR183W                 | PLP1          |
| YKL010C                                          | UFD4          | YDR440W                 | DOT1          |
| YOR212W                                          | STE4          | YLR362W                 | STE11         |
| YIL034C                                          | CAP2          | YBL051C                 | PIN4          |
| YFR031C-A                                        | RPL2A         | YKR001C                 | VPS1          |
| YHR167W                                          | THP2          | YER122C                 | GLO3          |
| YPL195W                                          | APL5          | YPR032W                 | SRO7          |
| YHR134W                                          | WSS1          | YAL002W                 | VPS8          |
| YJL183W                                          | MNN11         | YBR036C                 | CSG2          |
| YOR332W                                          | VMA4          | YDL185W                 | TFP1          |
| YBR065C                                          | ECM2          | YPR101W                 | SNT309        |
| YOR358W                                          | HAP5          | YJR135C                 | MCM22         |
| YDL116W                                          | NUP84         | YGR108W                 | CLB1          |
| YPR084W                                          | YPR084W       | YBR194W                 | SOY1          |
| YCR020C-A                                        | MAK31         | YOL108C                 | INO4          |
| YPL129W                                          | TAF14         | YLR399C                 | BDF1          |
| YBL102W                                          | SFT2          | YNL297C                 | MON2          |
| YJR063W                                          | RPA12         | YLR182W                 | SWI6          |
| YOR327C                                          | SNC2          | YPR032W                 | SRO7          |
| YML001W                                          | YPT7          | YMR152W                 | YIM1          |
| YCR066W                                          | RAD18         | YLR032W                 | RAD5          |

| Predictions at threshold level 0.80 continued... |               |                         |               |
|--------------------------------------------------|---------------|-------------------------|---------------|
| Gene1 of predicted pair                          |               | Gene2 of predicted pair |               |
| Systematic Name                                  | Standard Name | Systematic Name         | Standard Name |
| YLR337C                                          | VRP1          | YJR135C                 | MCM22         |
| YBR217W                                          | ATG12         | YBR280C                 | SAF1          |
| YHR079C                                          | IRE1          | YDR176W                 | NGG1          |
| YIL159W                                          | BNR1          | YBR217W                 | ATG12         |
| YPR052C                                          | NHP6A         | YOL148C                 | SPT20         |
| YBR036C                                          | CSG2          | YGL148W                 | ARO2          |
| YPL161C                                          | BEM4          | YNL238W                 | KEX2          |
| YOR043W                                          | WHI2          | YML071C                 | COG8          |
| YKL006W                                          | RPL14A        | YHL002W                 | HSE1          |
| YCL037C                                          | SRO9          | YPL037C                 | EGD1          |
| YOR290C                                          | SNF2          | YHR200W                 | RPN10         |
| YDL013W                                          | SLX5          | YGL175C                 | SAE2          |
| YDR293C                                          | SSD1          | YGR054W                 | YGR054W       |
| YLR102C                                          | APC9          | YBL087C                 | RPL23A        |
| YDR477W                                          | SNF1          | YDR028C                 | REG1          |
| YBR228W                                          | SLX1          | YMR284W                 | YKU70         |
| YBR030W                                          | YBR030W       | YDL083C                 | RPS16B        |
| YDR443C                                          | SSN2          | YLR441C                 | RPS1A         |
| YML016C                                          | PPZ1          | YNL225C                 | CNM67         |
| YEL056W                                          | HAT2          | YHL002W                 | HSE1          |
| YHR200W                                          | RPN10         | YMR038C                 | CCS1          |
| YOL121C                                          | RPS19A        | YDL077C                 | VAM6          |
| YLR337C                                          | VRP1          | YLR425W                 | TUS1          |
| YJL124C                                          | LSM1          | YLR313C                 | SPH1          |
| YJR140C                                          | HIR3          | YHL031C                 | GOS1          |
| YBR057C                                          | MUM2          | YPL096C-A               | ERI1          |
| YPL137C                                          | GIP3          | YER139C                 | YER139C       |
| YHR200W                                          | RPN10         | YBL025W                 | RRN10         |
| YPL024W                                          | RMI1          | YLR119W                 | SRN2          |

| Predictions at threshold level 0.80 continued... |               |                         |               |
|--------------------------------------------------|---------------|-------------------------|---------------|
| Gene1 of predicted pair                          |               | Gene2 of predicted pair |               |
| Systematic Name                                  | Standard Name | Systematic Name         | Standard Name |
| YER120W                                          | SCS2          | YHR012W                 | VPS29         |
| YIL076W                                          | SEC28         | YMR216C                 | SKY1          |
| YDR137W                                          | RGP1          | YHR200W                 | RPN10         |
| YDR318W                                          | MCM21         | YDR155C                 | CPR1          |
| YJR140C                                          | HIR3          | YJL138C                 | TIF2          |
| YHL031C                                          | GOS1          | YPL037C                 | EGD1          |
| YBL008W                                          | HIR1          | YLR410W                 | VIP1          |
| YNL236W                                          | SIN4          | YJR060W                 | CBF1          |
| YBR126C                                          | TPS1          | YMR261C                 | TPS3          |
| YJL053W                                          | PEP8          | YMR216C                 | SKY1          |
| YKL025C                                          | PAN3          | YHR134W                 | WSS1          |
| YMR246W                                          | FAA4          | YMR152W                 | YIM1          |
| YPL129W                                          | TAF14         | YDL005C                 | MED2          |
| YLR410W                                          | VIP1          | YNL116W                 | DMA2          |
| YNL031C                                          | HHT2          | YLR357W                 | RSC2          |
| YGL161C                                          | YIP5          | YGL198W                 | YIP4          |
| YEL053C                                          | MAK10         | YJR060W                 | CBF1          |
| YJL154C                                          | VPS35         | YCL001W                 | RER1          |
| YHR111W                                          | UBA4          | YGL253W                 | HXK2          |
| YKR001C                                          | VPS1          | YDR323C                 | PEP7          |
| YOR132W                                          | VPS17         | YLR447C                 | VMA6          |
| YLR337C                                          | VRP1          | YLR386W                 | VAC14         |
| YCL037C                                          | SRO9          | YOR124C                 | UBP2          |
| YPR049C                                          | ATG11         | YLR423C                 | ATG17         |
| YKL025C                                          | PAN3          | YMR109W                 | MYO5          |
| YDR293C                                          | SSD1          | YER033C                 | ZRG8          |
| YDR293C                                          | SSD1          | YJR060W                 | CBF1          |
| YAL024C                                          | LTE1          | YPR036W                 | VMA13         |
| YKL048C                                          | ELM1          | YPL161C                 | BEM4          |

| Predictions at threshold level 0.80 continued... |               |                         |               |
|--------------------------------------------------|---------------|-------------------------|---------------|
| Gene1 of predicted pair                          |               | Gene2 of predicted pair |               |
| Systematic Name                                  | Standard Name | Systematic Name         | Standard Name |
| YBR173C                                          | UMP1          | YFR036W                 | CDC26         |
| YDR378C                                          | LSM6          | YHR167W                 | THP2          |
| YHL031C                                          | GOS1          | YKR014C                 | YPT52         |
| YJL176C                                          | SWI3          | YBR228W                 | SLX1          |
| YDL155W                                          | CLB3          | YLR370C                 | ARC18         |
| YLR148W                                          | PEP3          | YDL226C                 | GCS1          |
| YDL223C                                          | HBT1          | YBL025W                 | RRN10         |
| YDR318W                                          | MCM21         | YJR090C                 | GRR1          |
| YLR083C                                          | EMP70         | YNL041C                 | COG6          |
| YBL103C                                          | RTG3          | YJL095W                 | BCK1          |
| YOR039W                                          | CKB2          | YML016C                 | PPZ1          |
| YHR134W                                          | WSS1          | YLR410W                 | VIP1          |
| YPL022W                                          | RAD1          | YMR202W                 | ERG2          |
| YFR036W                                          | CDC26         | YDR076W                 | RAD55         |
| YOL121C                                          | RPS19A        | YBL025W                 | RRN10         |
| YLR429W                                          | CRN1          | YDL155W                 | CLB3          |
| YDR439W                                          | LRS4          | YNL307C                 | MCK1          |
| YNL016W                                          | PUB1          | YJL187C                 | SWE1          |
| YBR200W                                          | BEM1          | YOL091W                 | SPO21         |
| YBR200W                                          | BEM1          | YOR141C                 | ARP8          |
| YBR173C                                          | UMP1          | YEL053C                 | MAK10         |
| YIL034C                                          | CAP2          | YOR023C                 | AHC1          |
| YDR293C                                          | SSD1          | YCL001W                 | RER1          |
| YNL297C                                          | MON2          | YDL077C                 | VAM6          |
| YDR335W                                          | MSN5          | YER139C                 | YER139C       |
| YMR055C                                          | BUB2          | YDR469W                 | SDC1          |
| YOR008C                                          | SLG1          | YPL161C                 | BEM4          |
| YKL139W                                          | CTK1          | YEL013W                 | VAC8          |
| YPR120C                                          | CLB5          | YJR035W                 | RAD26         |

| Predictions at threshold level 0.80 continued... |               |                         |               |
|--------------------------------------------------|---------------|-------------------------|---------------|
| Gene1 of predicted pair                          |               | Gene2 of predicted pair |               |
| Systematic Name                                  | Standard Name | Systematic Name         | Standard Name |
| YMR172W                                          | HOT1          | YHR114W                 | BZZ1          |
| YPR084W                                          | YPR084W       | YGR020C                 | VMA7          |
| YDR245W                                          | MNN10         | YOR106W                 | VAM3          |
| YLR079W                                          | SIC1          | YBR260C                 | RGD1          |
| YIL148W                                          | RPL40A        | YMR199W                 | CLN1          |
| YDR293C                                          | SSD1          | YGL124C                 | MON1          |
| YDL116W                                          | NUP84         | YHR115C                 | DMA1          |
| YOL018C                                          | TLG2          | YDL192W                 | ARF1          |
| YIL002C                                          | INP51         | YHR108W                 | GGA2          |
| YLR192C                                          | HCR1          | YOL121C                 | RPS19A        |
| YML071C                                          | COG8          | YOL018C                 | TLG2          |
| YBL051C                                          | PIN4          | YJR032W                 | CPR7          |
| YNL297C                                          | MON2          | YKR020W                 | VPS51         |
| YPR173C                                          | VPS4          | YKL041W                 | VPS24         |
| YFR036W                                          | CDC26         | YDR358W                 | GGA1          |
| YMR198W                                          | CIK1          | YNL107W                 | YAF9          |
| YHR013C                                          | ARD1          | YPR119W                 | CLB2          |
| YOR290C                                          | SNF2          | YOL121C                 | RPS19A        |
| YLR150W                                          | STM1          | YDR318W                 | MCM21         |
| YMR198W                                          | CIK1          | YML115C                 | VAN1          |
| YBL058W                                          | SHP1          | YKL116C                 | PRR1          |
| YDR484W                                          | VPS52         | YLR371W                 | ROM2          |
| YNL243W                                          | SLA2          | YDR156W                 | RPA14         |
| YIL053W                                          | RHR2          | YDL077C                 | VAM6          |
| YML062C                                          | MFT1          | YKL160W                 | ELF1          |
| YMR142C                                          | RPL13B        | YPL037C                 | EGD1          |
| YDR363W-A                                        | SEM1          | YGL031C                 | RPL24A        |
| YLR240W                                          | VPS34         | YPL045W                 | VPS16         |
| YNL166C                                          | BNI5          | YBR107C                 | IML3          |

| Predictions at threshold level 0.80 continued... |               |                         |               |
|--------------------------------------------------|---------------|-------------------------|---------------|
| Gene1 of predicted pair                          |               | Gene2 of predicted pair |               |
| Systematic Name                                  | Standard Name | Systematic Name         | Standard Name |
| YCR066W                                          | RAD18         | YPL037C                 | EGD1          |
| YGL178W                                          | MPT5          | YGL094C                 | PAN2          |
| YGR054W                                          | YGR054W       | YGL151W                 | NUT1          |
| YML103C                                          | NUP188        | YFR036W                 | CDC26         |
| YKR035W-A                                        | DID2          | YMR133W                 | REC114        |
| YDL056W                                          | MBP1          | YGL003C                 | CDH1          |
| YML115C                                          | VAN1          | YDR310C                 | SUM1          |
| YOR001W                                          | RRP6          | YDR254W                 | CHL4          |
| YPR173C                                          | VPS4          | YDL192W                 | ARF1          |
| YDR155C                                          | CPR1          | YAL002W                 | VPS8          |
| YBL021C                                          | HAP3          | YCR086W                 | CSM1          |
| YML095C                                          | RAD10         | YJR005W                 | APL1          |
| YAL024C                                          | LTE1          | YDR174W                 | HMO1          |
| YMR153W                                          | NUP53         | YLR371W                 | ROM2          |
| YPL037C                                          | EGD1          | YOL108C                 | INO4          |
| YHR156C                                          | LIN1          | YMR133W                 | REC114        |
| YIL159W                                          | BNR1          | YDR207C                 | UME6          |
| YOR043W                                          | WHI2          | YJR135C                 | MCM22         |
| YEL050C                                          | RML2          | YPR046W                 | MCM16         |
| YIL159W                                          | BNR1          | YNL041C                 | COG6          |
| YHR060W                                          | VMA22         | YPL137C                 | GIP3          |
| YIL038C                                          | NOT3          | YGR134W                 | CAF130        |
| YMR199W                                          | CLN1          | YPL253C                 | VIK1          |
| YPL115C                                          | BEM3          | YAL002W                 | VPS8          |
| YOR290C                                          | SNF2          | YGL124C                 | MON1          |
| YDL020C                                          | RPN4          | YOR191W                 | RIS1          |
| YOR080W                                          | DIA2          | YOL091W                 | SPO21         |
| YJL044C                                          | GYP6          | YDR456W                 | NHX1          |
| YHL020C                                          | OPI1          | YJR060W                 | CBF1          |



| Predictions at threshold level 0.80 continued... |               |                         |               |
|--------------------------------------------------|---------------|-------------------------|---------------|
| Gene1 of predicted pair                          |               | Gene2 of predicted pair |               |
| Systematic Name                                  | Standard Name | Systematic Name         | Standard Name |
| YOR270C                                          | VPH1          | YBL025W                 | RRN10         |
| YNL044W                                          | YIP3          | YNL051W                 | COG5          |
| YLR090W                                          | XDJ1          | YLR371W                 | ROM2          |
| YPR084W                                          | YPR084W       | YMR216C                 | SKY1          |
| YDR443C                                          | SSN2          | YPR072W                 | NOT5          |
| YOR195W                                          | SLK19         | YLR399C                 | BDF1          |
| YBR194W                                          | SOY1          | YBR107C                 | IML3          |
| YOL111C                                          | MDY2          | YNL041C                 | COG6          |
| YBL027W                                          | RPL19B        | YGL031C                 | RPL24A        |
| YFL047W                                          | RGD2          | YKL068W                 | NUP100        |
| YJR060W                                          | CBF1          | YOR141C                 | ARP8          |
| YNL264C                                          | PDR17         | YNL079C                 | TPM1          |
| YER116C                                          | SLX8          | YHR039C-A               | VMA10         |
| YNL229C                                          | URE2          | YGL031C                 | RPL24A        |
| YDR004W                                          | RAD57         | YMR038C                 | CCS1          |
| YKR095W                                          | MLP1          | YGL163C                 | RAD54         |
| YOL121C                                          | RPS19A        | YOR327C                 | SNC2          |
| YPL042C                                          | SSN3          | YGR270W                 | YTA7          |
| YHR111W                                          | UBA4          | YDL047W                 | SIT4          |
| YDR004W                                          | RAD57         | YHR010W                 | RPL27A        |
| YHR060W                                          | VMA22         | YER044C                 | ERG28         |
| YHR084W                                          | STE12         | YBR083W                 | TEC1          |
| YLR083C                                          | EMP70         | YKR001C                 | VPS1          |
| YLR170C                                          | APS1          | YDR358W                 | GGA1          |
| YNL117W                                          | MLS1          | YKL101W                 | HSL1          |
| YDL002C                                          | NHP10         | YDR137W                 | RGP1          |
| YBR278W                                          | DPB3          | YBR195C                 | MSI1          |
| YML001W                                          | YPT7          | YBR019C                 | GAL10         |
| YPL137C                                          | GIP3          | YER040W                 | GLN3          |

| Predictions at threshold level 0.80 continued... |               |                         |               |
|--------------------------------------------------|---------------|-------------------------|---------------|
| Gene1 of predicted pair                          |               | Gene2 of predicted pair |               |
| Systematic Name                                  | Standard Name | Systematic Name         | Standard Name |
| YNL094W                                          | APP1          | YLR144C                 | ACF2          |
| YBR171W                                          | SEC66         | YHL011C                 | PRS3          |
| YGL033W                                          | HOP2          | YER144C                 | UBP5          |
| YPL161C                                          | BEM4          | YPL137C                 | GIP3          |
| YMR026C                                          | PEX12         | YGL212W                 | VAM7          |
| YNR058W                                          | BIO3          | YML059C                 | NTE1          |
| YNL215W                                          | IES2          | YOR368W                 | RAD17         |
| YPL115C                                          | BEM3          | YNL288W                 | CAF40         |
| YJL136C                                          | RPS21B        | YKL048C                 | ELM1          |
| YGL175C                                          | SAE2          | YDR076W                 | RAD55         |
| YGL066W                                          | SGF73         | YGR184C                 | UBR1          |
| YHR039C-A                                        | VMA10         | YMR311C                 | GLC8          |
| YPL161C                                          | BEM4          | YNR032W                 | PPG1          |
| YER087C-B                                        | SBH1          | YNR049C                 | MSO1          |
| YDL020C                                          | RPN4          | YOL067C                 | RTG1          |
| YFR031C-A                                        | RPL2A         | YPL137C                 | GIP3          |
| YLR061W                                          | RPL22A        | YML071C                 | COG8          |
| YMR164C                                          | MSS11         | YER109C                 | FLO8          |
| YNL058C                                          | YNL058C       | YNL041C                 | COG6          |
| YPL256C                                          | CLN2          | YER049W                 | TPA1          |
| YJL127C                                          | SPT10         | YMR202W                 | ERG2          |
| YMR172W                                          | HOT1          | YJR032W                 | CPR7          |
| YBR108W                                          | YBR108W       | YCR086W                 | CSM1          |
| YLR452C                                          | SST2          | YOR066W                 | MSA1          |
| YHR013C                                          | ARD1          | YOL081W                 | IRA2          |
| YDR439W                                          | LRS4          | YHR115C                 | DMA1          |
| YNL201C                                          | PSY2          | YDR335W                 | MSN5          |
| YAL024C                                          | LTE1          | YJL124C                 | LSM1          |
| YMR153W                                          | NUP53         | YOR270C                 | VPH1          |

| Predictions at threshold level 0.80 continued... |               |                         |               |
|--------------------------------------------------|---------------|-------------------------|---------------|
| Gene1 of predicted pair                          |               | Gene2 of predicted pair |               |
| Systematic Name                                  | Standard Name | Systematic Name         | Standard Name |
| YBR217W                                          | ATG12         | YHR171W                 | ATG7          |
| YNR052C                                          | POP2          | YOR080W                 | DIA2          |
| YCR020C-A                                        | MAK31         | YEL043W                 | YEL043W       |
| YEL050C                                          | RML2          | YLR381W                 | CTF3          |
| YNL243W                                          | SLA2          | YLR234W                 | TOP3          |
| YPL161C                                          | BEM4          | YDR261C                 | EXG2          |
| YML016C                                          | PPZ1          | YNL116W                 | DMA2          |
| YMR153W                                          | NUP53         | YJL183W                 | MNN11         |
| YOL126C                                          | MDH2          | YIL148W                 | RPL40A        |
| YIL053W                                          | RHR2          | YMR026C                 | PEX12         |
| YDL184C                                          | RPL41A        | YKL048C                 | ELM1          |
| YFR030W                                          | MET10         | YNL107W                 | YAF9          |
| YGR072W                                          | UPF3          | YGL054C                 | ERV14         |
| YOR140W                                          | SFL1          | YHR205W                 | SCH9          |
| YDR129C                                          | SAC6          | YGL212W                 | VAM7          |
| YDR261C                                          | EXG2          | YML071C                 | COG8          |
| YLR090W                                          | XDJ1          | YDR443C                 | SSN2          |
| YPL137C                                          | GIP3          | YEL060C                 | PRB1          |
| YNL206C                                          | RTT106        | YDL047W                 | SIT4          |
| YMR116C                                          | ASC1          | YOR312C                 | RPL20B        |
| YDR383C                                          | NKP1          | YDR318W                 | MCM21         |
| YNL069C                                          | RPL16B        | YGL246C                 | RAI1          |
| YKL073W                                          | LHS1          | YJL159W                 | HSP150        |
| YDR320C                                          | SWA2          | YDR108W                 | GSG1          |
| YHL031C                                          | GOS1          | YLR350W                 | ORM2          |
| YPR036W                                          | VMA13         | YPL057C                 | SUR1          |
| YML097C                                          | VPS9          | YBR082C                 | UBC4          |
| YOR290C                                          | SNF2          | YMR230W                 | RPS10B        |
| YML016C                                          | PPZ1          | YML112W                 | CTK3          |

| Predictions at threshold level 0.80 continued... |               |                         |               |
|--------------------------------------------------|---------------|-------------------------|---------------|
| Gene1 of predicted pair                          |               | Gene2 of predicted pair |               |
| Systematic Name                                  | Standard Name | Systematic Name         | Standard Name |
| YPL161C                                          | BEM4          | YOR043W                 | WHI2          |
| YHR119W                                          | SET1          | YAR003W                 | SWD1          |
| YFL026W                                          | STE2          | YJR086W                 | STE18         |
| YHR098C                                          | SFB3          | YCR053W                 | THR4          |
| YDR477W                                          | SNF1          | YGL208W                 | SIP2          |
| YGL174W                                          | BUD13         | YDR137W                 | RGP1          |
| YMR004W                                          | MVP1          | YCL001W                 | RER1          |
| YJL176C                                          | SWI3          | YPL213W                 | LEA1          |
| YLR432W                                          | IMD3          | YHR216W                 | IMD2          |
| YDR245W                                          | MNN10         | YJL117W                 | PHO86         |
| YOR066W                                          | MSA1          | YNL238W                 | KEX2          |
| YKR072C                                          | SIS2          | YMR199W                 | CLN1          |
| YDR443C                                          | SSN2          | YPL248C                 | GAL4          |
| YNL041C                                          | COG6          | YLR371W                 | ROM2          |
| YOR327C                                          | SNC2          | YJL095W                 | BCK1          |
| YJL124C                                          | LSM1          | YBR107C                 | IML3          |
| YNL201C                                          | PSY2          | YHR013C                 | ARD1          |
| YMR198W                                          | CIK1          | YPR046W                 | MCM16         |
| YLR234W                                          | TOP3          | YPR119W                 | CLB2          |
| YLR083C                                          | EMP70         | YDR108W                 | GSG1          |
| YKR072C                                          | SIS2          | YDR289C                 | RTT103        |
| YDR484W                                          | VPS52         | YGL095C                 | VPS45         |
| YPL234C                                          | TFP3          | YNL127W                 | FAR11         |
| YMR216C                                          | SKY1          | YML038C                 | YMD8          |
| YGL025C                                          | PGD1          | YDR310C                 | SUM1          |
| YLR386W                                          | VAC14         | YDL047W                 | SIT4          |
| YGL153W                                          | PEX14         | YNL214W                 | PEX17         |
| YOR270C                                          | VPH1          | YDR358W                 | GGA1          |
| YPL042C                                          | SSN3          | YCR084C                 | TUP1          |

| Predictions at threshold level 0.80 continued... |               |                         |               |
|--------------------------------------------------|---------------|-------------------------|---------------|
| Gene1 of predicted pair                          |               | Gene2 of predicted pair |               |
| Systematic Name                                  | Standard Name | Systematic Name         | Standard Name |
| YNL087W                                          | TCB2          | YKL048C                 | ELM1          |
| YBR217W                                          | ATG12         | YOL111C                 | MDY2          |
| YBL008W                                          | HIR1          | YGL163C                 | RAD54         |
| YEL053C                                          | MAK10         | YDR318W                 | MCM21         |
| YBL008W                                          | HIR1          | YOR039W                 | CKB2          |
| YDR156W                                          | RPA14         | YDR378C                 | LSM6          |
| YPL161C                                          | BEM4          | YDR153C                 | ENT5          |
| YBR030W                                          | YBR030W       | YNL325C                 | FIG4          |
| YLR381W                                          | CTF3          | YDL155W                 | CLB3          |
| YDR260C                                          | SWM1          | YPR046W                 | MCM16         |
| YJL154C                                          | VPS35         | YHR178W                 | STB5          |
| YOR127W                                          | RGA1          | YPL105C                 | YPL105C       |
| YNL106C                                          | INP52         | YNL107W                 | YAF9          |
| YOR290C                                          | SNF2          | YER162C                 | RAD4          |
| YNL166C                                          | BNI5          | YOL067C                 | RTG1          |
| YAL010C                                          | MDM10         | YNL116W                 | DMA2          |
| YKL048C                                          | ELM1          | YAL002W                 | VPS8          |
| YOR332W                                          | VMA4          | YKR001C                 | VPS1          |
| YFR010W                                          | UBP6          | YJR056C                 | YJR056C       |
| YFR031C-A                                        | RPL2A         | YER139C                 | YER139C       |
| YKL110C                                          | KTI12         | YLR315W                 | NKP2          |
| YMR004W                                          | MVP1          | YDL006W                 | PTC1          |
| YJR063W                                          | RPA12         | YFR030W                 | MET10         |
| YPR030W                                          | CSR2          | YLR093C                 | NYV1          |
| YMR039C                                          | SUB1          | YER161C                 | SPT2          |
| YOR101W                                          | RAS1          | YGR188C                 | BUB1          |
| YGL133W                                          | ITC1          | YBR200W                 | BEM1          |
| YEL050C                                          | RML2          | YML016C                 | PPZ1          |
| YHR200W                                          | RPN10         | YLR398C                 | SKI2          |

| Predictions at threshold level 0.80 continued... |               |                         |               |
|--------------------------------------------------|---------------|-------------------------|---------------|
| Gene1 of predicted pair                          |               | Gene2 of predicted pair |               |
| Systematic Name                                  | Standard Name | Systematic Name         | Standard Name |
| YIL076W                                          | SEC28         | YJL183W                 | MNN11         |
| YMR216C                                          | SKY1          | YKR030W                 | GMH1          |
| YBR215W                                          | HPC2          | YER161C                 | SPT2          |
| YHR081W                                          | LRP1          | YEL060C                 | PRB1          |
| YGL223C                                          | COG1          | YNL297C                 | MON2          |
| YMR164C                                          | MSS11         | YOR358W                 | HAP5          |
| YLR447C                                          | VMA6          | YHR060W                 | VMA22         |
| YOR132W                                          | VPS17         | YMR127C                 | SAS2          |
| YNL291C                                          | MID1          | YOR112W                 | CEX1          |
| YML103C                                          | NUP188        | YPL253C                 | VIK1          |
| YPR030W                                          | CSR2          | YER122C                 | GLO3          |
| YDR108W                                          | GSG1          | YOR106W                 | VAM3          |
| YNL044W                                          | YIP3          | YDL077C                 | VAM6          |
| YNL153C                                          | GIM3          | YGL190C                 | CDC55         |
| YBR171W                                          | SEC66         | YML067C                 | ERV41         |
| YBL025W                                          | RRN10         | YNL076W                 | MKS1          |
| YPL037C                                          | EGD1          | YEL051W                 | VMA8          |
| YDL116W                                          | NUP84         | YOR001W                 | RRP6          |
| YEL065W                                          | SIT1          | YNL087W                 | TCB2          |
| YPL253C                                          | VIK1          | YOL091W                 | SPO21         |
| YDL223C                                          | HBT1          | YMR133W                 | REC114        |
| YHR152W                                          | SPO12         | YBL087C                 | RPL23A        |
| YMR172W                                          | HOT1          | YHR134W                 | WSS1          |
| YOR076C                                          | SKI7          | YHR081W                 | LRP1          |
| YGR129W                                          | SYF2          | YBR188C                 | NTC20         |
| YLR371W                                          | ROM2          | YBR082C                 | UBC4          |
| YJL058C                                          | BIT61         | YDR171W                 | HSP42         |
| YDL020C                                          | RPN4          | YHR134W                 | WSS1          |
| YDR225W                                          | HTA1          | YNL307C                 | MCK1          |

| Predictions at threshold level 0.80 continued... |               |                         |               |
|--------------------------------------------------|---------------|-------------------------|---------------|
| Gene1 of predicted pair                          |               | Gene2 of predicted pair |               |
| Systematic Name                                  | Standard Name | Systematic Name         | Standard Name |
| YCL037C                                          | SRO9          | YJR040W                 | GEF1          |
| YFR032C-A                                        | RPL29         | YMR116C                 | ASC1          |
| YMR311C                                          | GLC8          | YEL036C                 | ANP1          |
| YHR156C                                          | LIN1          | YDR261C                 | EXG2          |
| YPL195W                                          | APL5          | YJL095W                 | BCK1          |
| YEL065W                                          | SIT1          | YER044C                 | ERG28         |
| YJR063W                                          | RPA12         | YIR005W                 | IST3          |
| YDR335W                                          | MSN5          | YFR034C                 | PHO4          |
| YPL161C                                          | BEM4          | YDR218C                 | SPR28         |
| YLR320W                                          | MMS22         | YDL083C                 | RPS16B        |
| YGR020C                                          | VMA7          | YKR001C                 | VPS1          |
| YLR079W                                          | SIC1          | YEL036C                 | ANP1          |
| YMR153W                                          | NUP53         | YER044C                 | ERG28         |
| YBL079W                                          | NUP170        | YLR410W                 | VIP1          |
| YPR046W                                          | MCM16         | YOL054W                 | PSH1          |
| YFR010W                                          | UBP6          | YER122C                 | GLO3          |
| YGL060W                                          | YBP2          | YEL050C                 | RML2          |
| YGL025C                                          | PGD1          | YLR093C                 | NYV1          |
| YBR084C-A                                        | RPL19A        | YKR048C                 | NAP1          |
| YDL161W                                          | ENT1          | YKR001C                 | VPS1          |
| YKR035W-A                                        | DID2          | YDR358W                 | GGA1          |
| YDR507C                                          | GIN4          | YKL101W                 | HSL1          |
| YBR258C                                          | SHG1          | YDR469W                 | SDC1          |
| YAL024C                                          | LTE1          | YDR260C                 | SWM1          |
| YLR119W                                          | SRN2          | YOR270C                 | VPH1          |
| YDR254W                                          | CHL4          | YNL107W                 | YAF9          |
| YNL068C                                          | FKH2          | YBL047C                 | EDE1          |
| YLR320W                                          | MMS22         | YGL124C                 | MON1          |
| YJL172W                                          | CPS1          | YEL053C                 | MAK10         |

| Predictions at threshold level 0.80 continued... |               |                         |               |
|--------------------------------------------------|---------------|-------------------------|---------------|
| Gene1 of predicted pair                          |               | Gene2 of predicted pair |               |
| Systematic Name                                  | Standard Name | Systematic Name         | Standard Name |
| YFL023W                                          | BUD27         | YHR060W                 | VMA22         |
| YDL160C                                          | DHH1          | YER129W                 | SAK1          |
| YCR084C                                          | TUP1          | YBR089C-A               | NHP6B         |
| YLR337C                                          | VRP1          | YLR360W                 | VPS38         |
| YOR033C                                          | EXO1          | YFL023W                 | BUD27         |
| YHL002W                                          | HSE1          | YNR006W                 | VPS27         |
| YLR441C                                          | RPS1A         | YDL077C                 | VAM6          |
| YLR452C                                          | SST2          | YHR081W                 | LRP1          |
| YNL106C                                          | INP52         | YPR173C                 | VPS4          |
| YOR193W                                          | PEX27         | YMR204C                 | INP1          |
| YLR095C                                          | IOC2          | YBR217W                 | ATG12         |
| YGL212W                                          | VAM7          | YJR125C                 | ENT3          |
| YNL199C                                          | GCR2          | YKL213C                 | DOA1          |
| YLR083C                                          | EMP70         | YAL002W                 | VPS8          |
| YGL100W                                          | SEH1          | YMR167W                 | MLH1          |
| YJL053W                                          | PEP8          | YCR088W                 | ABP1          |
| YDR183W                                          | PLP1          | YGL253W                 | HXK2          |
| YNL025C                                          | SSN8          | YGL174W                 | BUD13         |
| YKL126W                                          | YPK1          | YMR214W                 | SCJ1          |
| YDL116W                                          | NUP84         | YNL225C                 | CNM67         |
| YDR480W                                          | DIG2          | YMR199W                 | CLN1          |
| YKL007W                                          | CAP1          | YJL095W                 | BCK1          |
| YGR108W                                          | CLB1          | YBR108W                 | YBR108W       |
| YBR127C                                          | VMA2          | YHR039C-A               | VMA10         |
| YOR023C                                          | AHC1          | YOL067C                 | RTG1          |
| YKL048C                                          | ELM1          | YER040W                 | GLN3          |
| YDL020C                                          | RPN4          | YPL256C                 | CLN2          |
| YGL066W                                          | SGF73         | YOR127W                 | RGA1          |
| YGL151W                                          | NUT1          | YEL056W                 | HAT2          |



| Predictions at threshold level 0.80 continued... |               |                         |               |
|--------------------------------------------------|---------------|-------------------------|---------------|
| Gene1 of predicted pair                          |               | Gene2 of predicted pair |               |
| Systematic Name                                  | Standard Name | Systematic Name         | Standard Name |
| YHL031C                                          | GOS1          | YHR039C-A               | VMA10         |
| YER161C                                          | SPT2          | YGL151W                 | NUT1          |
| YLR381W                                          | CTF3          | YLR233C                 | EST1          |
| YMR004W                                          | MVP1          | YEL053C                 | MAK10         |
| YLL039C                                          | UBI4          | YPL096C-A               | ERI1          |
| YBR108W                                          | YBR108W       | YOL067C                 | RTG1          |
| YPL096C-A                                        | ERI1          | YER001W                 | MNN1          |
| YMR199W                                          | CLN1          | YNL199C                 | GCR2          |
| YKL139W                                          | CTK1          | YML112W                 | CTK3          |
| YKR101W                                          | SIR1          | YOR038C                 | HIR2          |
| YPR017C                                          | DSS4          | YAL030W                 | SNC1          |
| YEL065W                                          | SIT1          | YLR093C                 | NYV1          |
| YMR224C                                          | MRE11         | YPR120C                 | CLB5          |
| YNL215W                                          | IES2          | YGL174W                 | BUD13         |
| YJL124C                                          | LSM1          | YNL107W                 | YAF9          |
| YOR324C                                          | FRT1          | YML057W                 | CMP2          |
| YEL065W                                          | SIT1          | YKL048C                 | ELM1          |
| YLR381W                                          | CTF3          | YCR086W                 | CSM1          |
| YML038C                                          | YMD8          | YJR060W                 | CBF1          |
| YMR054W                                          | STV1          | YDL192W                 | ARF1          |
| YHL002W                                          | HSE1          | YAL002W                 | VPS8          |
| YGL147C                                          | RPL9A         | YER040W                 | GLN3          |
| YLR386W                                          | VAC14         | YML112W                 | CTK3          |
| YDR443C                                          | SSN2          | YNL325C                 | FIG4          |
| YDR363W-A                                        | SEM1          | YPL152W                 | RRD2          |
| YPR131C                                          | NAT3          | YOR368W                 | RAD17         |
| YBL079W                                          | NUP170        | YBR082C                 | UBC4          |
| YNL094W                                          | APP1          | YJL187C                 | SWE1          |
| YMR284W                                          | YKU70         | YDL047W                 | SIT4          |

| Predictions at threshold level 0.80 continued... |               |                         |               |
|--------------------------------------------------|---------------|-------------------------|---------------|
| Gene1 of predicted pair                          |               | Gene2 of predicted pair |               |
| Systematic Name                                  | Standard Name | Systematic Name         | Standard Name |
| YNL106C                                          | INP52         | YFR010W                 | UBP6          |
| YLR095C                                          | IOC2          | YER162C                 | RAD4          |
| YMR039C                                          | SUB1          | YBR274W                 | CHK1          |
| YMR127C                                          | SAS2          | YGL151W                 | NUT1          |
| YHR200W                                          | RPN10         | YOR066W                 | MSA1          |
| YNL307C                                          | MCK1          | YML001W                 | YPT7          |
| YBR200W                                          | BEM1          | YGL031C                 | RPL24A        |
| YIR002C                                          | MPH1          | YLR320W                 | MMS22         |
| YER116C                                          | SLX8          | YGR184C                 | UBR1          |
| YOL030W                                          | GAS5          | YGL031C                 | RPL24A        |
| YGL212W                                          | VAM7          | YBR280C                 | SAF1          |
| YLR452C                                          | SST2          | YEL060C                 | PRB1          |
| YFR032C-A                                        | RPL29         | YHR200W                 | RPN10         |
| YLR090W                                          | XDJ1          | YDL192W                 | ARF1          |
| YKL126W                                          | YPK1          | YBL072C                 | RPS8A         |
| YOR195W                                          | SLK19         | YML028W                 | TSA1          |
| YDR254W                                          | CHL4          | YHL002W                 | HSE1          |
| YBR041W                                          | FAT1          | YLR371W                 | ROM2          |
| YGL153W                                          | PEX14         | YPL161C                 | BEM4          |
| YBL008W                                          | HIR1          | YDR073W                 | SNF11         |
| YKR084C                                          | HBS1          | YJL191W                 | RPS14B        |
| YMR152W                                          | YIM1          | YKL140W                 | TGL1          |
| YOR109W                                          | INP53         | YJR040W                 | GEF1          |
| YGL174W                                          | BUD13         | YKL213C                 | DOA1          |
| YPL256C                                          | CLN2          | YDR076W                 | RAD55         |
| YJR063W                                          | RPA12         | YJL006C                 | CTK2          |
| YKL126W                                          | YPK1          | YMR152W                 | YIM1          |
| YDR137W                                          | RGP1          | YHR039C-A               | VMA10         |
| YGR135W                                          | PRE9          | YLR357W                 | RSC2          |

| Predictions at threshold level 0.80 continued... |               |                         |               |
|--------------------------------------------------|---------------|-------------------------|---------------|
| Gene1 of predicted pair                          |               | Gene2 of predicted pair |               |
| Systematic Name                                  | Standard Name | Systematic Name         | Standard Name |
| YLR337C                                          | VRP1          | YDR144C                 | MKC7          |
| YLR093C                                          | NYV1          | YNL076W                 | MKS1          |
| YML038C                                          | YMD8          | YGL115W                 | SNF4          |
| YCR034W                                          | FEN1          | YJR140C                 | HIR3          |
| YLR119W                                          | SRN2          | YGL025C                 | PGD1          |
| YCR086W                                          | CSM1          | YBR082C                 | UBC4          |
| YBR042C                                          | CST26         | YLR131C                 | ACE2          |
| YKL101W                                          | HSL1          | YLR350W                 | ORM2          |
| YDL223C                                          | HBT1          | YMR230W                 | RPS10B        |
| YIL148W                                          | RPL40A        | YKR024C                 | DBP7          |
| YCR066W                                          | RAD18         | YMR054W                 | STV1          |
| YKL139W                                          | CTK1          | YDR207C                 | UME6          |
| YNL325C                                          | FIG4          | YDR310C                 | SUM1          |
| YGL100W                                          | SEH1          | YOL090W                 | MSH2          |
| YIL036W                                          | CST6          | YPL018W                 | CTF19         |
| YDR146C                                          | SWI5          | YDR289C                 | RTT103        |
| YGL078C                                          | DBP3          | YNL238W                 | KEX2          |
| YMR095C                                          | SNO1          | YPL024W                 | RMI1          |
| YBL008W                                          | HIR1          | YGL019W                 | CKB1          |
| YPL137C                                          | GIP3          | YML071C                 | COG8          |
| YBR228W                                          | SLX1          | YOL090W                 | MSH2          |
| YPL234C                                          | TFP3          | YDL006W                 | PTC1          |
| YLR381W                                          | CTF3          | YDL013W                 | SLX5          |
| YKR069W                                          | MET1          | YMR109W                 | MYO5          |
| YJL154C                                          | VPS35         | YGL115W                 | SNF4          |
| YIL159W                                          | BNR1          | YGL025C                 | PGD1          |
| YPL042C                                          | SSN3          | YGL174W                 | BUD13         |
| YDR358W                                          | GGA1          | YEL060C                 | PRB1          |
| YMR016C                                          | SOK2          | YER122C                 | GLO3          |

| Predictions at threshold level 0.80 continued... |               |                         |               |
|--------------------------------------------------|---------------|-------------------------|---------------|
| Gene1 of predicted pair                          |               | Gene2 of predicted pair |               |
| Systematic Name                                  | Standard Name | Systematic Name         | Standard Name |
| YLR337C                                          | VRP1          | YAL002W                 | VPS8          |
| YOR032C                                          | HMS1          | YPR046W                 | MCM16         |
| YLR192C                                          | HCR1          | YPR030W                 | CSR2          |
| YML028W                                          | TSA1          | YDR207C                 | UME6          |
| YER107C                                          | GLE2          | YDR334W                 | SWR1          |
| YHR039C-A                                        | VMA10         | YML071C                 | COG8          |
| YHR013C                                          | ARD1          | YLR254C                 | NDL1          |
| YGR129W                                          | SYF2          | YIR005W                 | IST3          |
| YDR318W                                          | MCM21         | YGL253W                 | HXK2          |
| YGL033W                                          | HOP2          | YHR060W                 | VMA22         |
| YDR443C                                          | SSN2          | YOR327C                 | SNC2          |
| YDR254W                                          | CHL4          | YDR076W                 | RAD55         |
| YNL215W                                          | IES2          | YKR061W                 | KTR2          |
| YPR017C                                          | DSS4          | YJL036W                 | SNX4          |
| YOR001W                                          | RRP6          | YLR410W                 | VIP1          |
| YMR095C                                          | SNO1          | YCR053W                 | THR4          |
| YNL107W                                          | YAF9          | YKR030W                 | GMH1          |
| YLR090W                                          | XDJ1          | YBR173C                 | UMP1          |
| YBR200W                                          | BEM1          | YPL152W                 | RRD2          |
| YDR129C                                          | SAC6          | YGL200C                 | EMP24         |
| YMR202W                                          | ERG2          | YBR215W                 | HPC2          |
| YPR036W                                          | VMA13         | YNL307C                 | MCK1          |
| YIL076W                                          | SEC28         | YJL004C                 | SYS1          |
| YKL139W                                          | CTK1          | YDR289C                 | RTT103        |
| YGL237C                                          | HAP2          | YDR469W                 | SDC1          |
| YDR202C                                          | RAV2          | YDR153C                 | ENT5          |
| YDR245W                                          | MNN10         | YOR035C                 | SHE4          |
| YHL031C                                          | GOS1          | YEL043W                 | YEL043W       |
| YFR010W                                          | UBP6          | YLR452C                 | SST2          |

| Predictions at threshold level 0.80 continued... |               |                         |               |
|--------------------------------------------------|---------------|-------------------------|---------------|
| Gene1 of predicted pair                          |               | Gene2 of predicted pair |               |
| Systematic Name                                  | Standard Name | Systematic Name         | Standard Name |
| YDR383C                                          | NKP1          | YJL124C                 | LSM1          |
| YGL033W                                          | HOP2          | YML001W                 | YPT7          |
| YPL050C                                          | MNN9          | YML067C                 | ERV41         |
| YDL013W                                          | SLX5          | YHR200W                 | RPN10         |
| YPR017C                                          | DSS4          | YPL037C                 | EGD1          |
| YPL161C                                          | BEM4          | YBR114W                 | RAD16         |
| YPL234C                                          | TFP3          | YJL004C                 | SYS1          |
| YLR292C                                          | SEC72         | YNL166C                 | BNI5          |
| YLR410W                                          | VIP1          | YGR188C                 | BUB1          |
| YLR102C                                          | APC9          | YKR057W                 | RPS21A        |
| YPL057C                                          | SUR1          | YBR280C                 | SAF1          |
| YNL325C                                          | FIG4          | YDR358W                 | GGA1          |
| YGL033W                                          | HOP2          | YPR046W                 | MCM16         |
| YAL024C                                          | LTE1          | YHR156C                 | LIN1          |
| YGR249W                                          | MGA1          | YER044C                 | ERG28         |
| YJR056C                                          | YJR056C       | YLR398C                 | SKI2          |
| YJL124C                                          | LSM1          | YBR195C                 | MSI1          |
| YOR080W                                          | DIA2          | YDR335W                 | MSN5          |
| YML115C                                          | VAN1          | YKL101W                 | HSL1          |
| YMR198W                                          | CIK1          | YLR429W                 | CRN1          |
| YDR156W                                          | RPA14         | YHR111W                 | UBA4          |
| YMR133W                                          | REC114        | YMR230W                 | RPS10B        |
| YIL036W                                          | CST6          | YPL180W                 | TCO89         |
| YLR192C                                          | HCR1          | YNL058C                 | YNL058C       |
| YJL183W                                          | MNN11         | YDL192W                 | ARF1          |
| YDR146C                                          | SWI5          | YKL161C                 | YKL161C       |
| YDR137W                                          | RGP1          | YGL115W                 | SNF4          |
| YLR083C                                          | EMP70         | YHL031C                 | GOS1          |
| YML103C                                          | NUP188        | YML016C                 | PPZ1          |

| Predictions at threshold level 0.80 continued... |               |                         |               |
|--------------------------------------------------|---------------|-------------------------|---------------|
| Gene1 of predicted pair                          |               | Gene2 of predicted pair |               |
| Systematic Name                                  | Standard Name | Systematic Name         | Standard Name |
| YIL148W                                          | RPL40A        | YML057W                 | CMP2          |
| YLR360W                                          | VPS38         | YJL036W                 | SNX4          |
| YOR039W                                          | CKB2          | YDR310C                 | SUM1          |
| YLR079W                                          | SIC1          | YMR055C                 | BUB2          |
| YNL054W                                          | VAC7          | YFR036W                 | CDC26         |
| YIR005W                                          | IST3          | YAL002W                 | VPS8          |
| YLR192C                                          | HCR1          | YOR043W                 | WHI2          |
| YPL253C                                          | VIK1          | YDR310C                 | SUM1          |
| YDR335W                                          | MSN5          | YER122C                 | GLO3          |
| YEL022W                                          | GEA2          | YDL137W                 | ARF2          |
| YHR156C                                          | LIN1          | YKR099W                 | BAS1          |
| YGR020C                                          | VMA7          | YPL037C                 | EGD1          |
| YMR199W                                          | CLN1          | YFR040W                 | SAP155        |
| YJR060W                                          | CBF1          | YAR014C                 | BUD14         |
| YBR108W                                          | YBR108W       | YOR358W                 | HAP5          |
| YNL051W                                          | COG5          | YOL108C                 | INO4          |
| YLR079W                                          | SIC1          | YDR310C                 | SUM1          |
| YMR199W                                          | CLN1          | YGL016W                 | KAP122        |
| YPL129W                                          | TAF14         | YOR064C                 | YNG1          |
| YLR095C                                          | IOC2          | YGL033W                 | HOP2          |
| YER087C-B                                        | SBH1          | YPR141C                 | KAR3          |
| YOR156C                                          | NFI1          | YPL161C                 | BEM4          |
| YKL139W                                          | CTK1          | YMR152W                 | YIM1          |
| YDL077C                                          | VAM6          | YCR053W                 | THR4          |
| YDL184C                                          | RPL41A        | YGL115W                 | SNF4          |
| YNL106C                                          | INP52         | YAR014C                 | BUD14         |
| YMR198W                                          | CIK1          | YNL307C                 | MCK1          |
| YDL020C                                          | RPN4          | YHR060W                 | VMA22         |
| YGL223C                                          | COG1          | YBR171W                 | SEC66         |

| Predictions at threshold level 0.80 continued... |               |                         |               |
|--------------------------------------------------|---------------|-------------------------|---------------|
| Gene1 of predicted pair                          |               | Gene2 of predicted pair |               |
| Systematic Name                                  | Standard Name | Systematic Name         | Standard Name |
| YGR019W                                          | UGA1          | YJR032W                 | CPR7          |
| YKL048C                                          | ELM1          | YBR280C                 | SAF1          |
| YLR386W                                          | VAC14         | YGL124C                 | MON1          |
| YMR055C                                          | BUB2          | YEL056W                 | HAT2          |
| YDL116W                                          | NUP84         | YJL187C                 | SWE1          |
| YJR063W                                          | RPA12         | YGL252C                 | RTG2          |
| YDR477W                                          | SNF1          | YBR036C                 | CSG2          |
| YJL136C                                          | RPS21B        | YNL229C                 | URE2          |
| YCR086W                                          | CSM1          | YML028W                 | TSA1          |
| YPL234C                                          | TFP3          | YNR032W                 | PPG1          |
| YOL067C                                          | RTG1          | YGR188C                 | BUB1          |
| YKR020W                                          | VPS51         | YJR084W                 | CSN12         |
| YAL024C                                          | LTE1          | YIL036W                 | CST6          |
| YLR452C                                          | SST2          | YMR311C                 | GLC8          |
| YKL010C                                          | UFD4          | YJL006C                 | CTK2          |
| YMR152W                                          | YIM1          | YDR207C                 | UME6          |
| YCR086W                                          | CSM1          | YOR141C                 | ARP8          |
| YDR293C                                          | SSD1          | YKL074C                 | MUD2          |
| YMR142C                                          | RPL13B        | YER144C                 | UBP5          |
| YJL138C                                          | TIF2          | YJR032W                 | CPR7          |
| YBR171W                                          | SEC66         | YNL079C                 | TPM1          |
| YIL053W                                          | RHR2          | YOL121C                 | RPS19A        |
| YBR041W                                          | FAT1          | YGR192C                 | TDH3          |
| YGL212W                                          | VAM7          | YNL107W                 | YAF9          |
| YER110C                                          | KAP123        | YPL178W                 | CBC2          |
| YKR059W                                          | TIF1          | YBR274W                 | CHK1          |
| YNL201C                                          | PSY2          | YDR318W                 | MCM21         |
| YLR234W                                          | TOP3          | YOR358W                 | HAP5          |
| YGL124C                                          | MON1          | YMR214W                 | SCJ1          |

| Predictions at threshold level 0.80 continued... |               |                         |               |
|--------------------------------------------------|---------------|-------------------------|---------------|
| Gene1 of predicted pair                          |               | Gene2 of predicted pair |               |
| Systematic Name                                  | Standard Name | Systematic Name         | Standard Name |
| YBR200W                                          | BEM1          | YCR053W                 | THR4          |
| YDR261C                                          | EXG2          | YMR311C                 | GLC8          |
| YMR216C                                          | SKY1          | YER120W                 | SCS2          |
| YNL291C                                          | MID1          | YDR076W                 | RAD55         |
| YNL325C                                          | FIG4          | YFL023W                 | BUD27         |
| YOR127W                                          | RGA1          | YNL166C                 | BNI5          |
| YGL163C                                          | RAD54         | YDL047W                 | SIT4          |
| YNL297C                                          | MON2          | YHR012W                 | VPS29         |
| YJL006C                                          | CTK2          | YJR135C                 | MCM22         |
| YLR320W                                          | MMS22         | YML001W                 | YPT7          |
| YDR289C                                          | RTT103        | YGL252C                 | RTG2          |
| YDR192C                                          | NUP42         | YNL049C                 | SFB2          |
| YGL025C                                          | PGD1          | YPL195W                 | APL5          |
| YML115C                                          | VAN1          | YNL041C                 | COG6          |
| YPL253C                                          | VIK1          | YKL110C                 | KTI12         |
| YNL238W                                          | KEX2          | YOL081W                 | IRA2          |
| YDL161W                                          | ENT1          | YDR358W                 | GGA1          |
| YGR081C                                          | SLX9          | YML028W                 | TSA1          |
| YMR095C                                          | SNO1          | YGL124C                 | MON1          |
| YNL025C                                          | SSN8          | YNL215W                 | IES2          |
| YGR071C                                          | YGR071C       | YBR036C                 | CSG2          |
| YBR200W                                          | BEM1          | YML109W                 | ZDS2          |
| YMR284W                                          | YKU70         | YHR056C                 | RSC30         |
| YNL031C                                          | HHT2          | YLR182W                 | SWI6          |
| YPL024W                                          | RMI1          | YBR274W                 | CHK1          |
| YHR013C                                          | ARD1          | YJR063W                 | RPA12         |
| YPL024W                                          | RMI1          | YIL076W                 | SEC28         |
| YGR072W                                          | UPF3          | YML038C                 | YMD8          |
| YHL011C                                          | PRS3          | YPR119W                 | CLB2          |



| Predictions at threshold level 0.80 continued... |               |                         |               |
|--------------------------------------------------|---------------|-------------------------|---------------|
| Gene1 of predicted pair                          |               | Gene2 of predicted pair |               |
| Systematic Name                                  | Standard Name | Systematic Name         | Standard Name |
| YJR032W                                          | CPR7          | YKL119C                 | VPH2          |
| YDR439W                                          | LRS4          | YNL248C                 | RPA49         |
| YML115C                                          | VAN1          | YNL087W                 | TCB2          |
| YOR066W                                          | MSA1          | YOL121C                 | RPS19A        |
| YDL161W                                          | ENT1          | YBL047C                 | EDE1          |
| YGL019W                                          | CKB1          | YDR310C                 | SUM1          |
| YAL024C                                          | LTE1          | YOR213C                 | SAS5          |
| YOR327C                                          | SNC2          | YAL002W                 | VPS8          |
| YPR018W                                          | RLF2          | YJR090C                 | GRR1          |
| YDR320C                                          | SWA2          | YDR080W                 | VPS41         |
| YJR040W                                          | GEF1          | YKR030W                 | GMH1          |
| YOR308C                                          | SNU66         | YEL013W                 | VAC8          |
| YNL058C                                          | YNL058C       | YCR053W                 | THR4          |
| YIL053W                                          | RHR2          | YER162C                 | RAD4          |
| YNL215W                                          | IES2          | YNL307C                 | MCK1          |
| YBL019W                                          | APN2          | YDL047W                 | SIT4          |
| YLR090W                                          | XDJ1          | YJL095W                 | BCK1          |
| YLR006C                                          | SSK1          | YBR200W                 | BEM1          |
| YBR108W                                          | YBR108W       | YBR171W                 | SEC66         |
| YDR507C                                          | GIN4          | YGL190C                 | CDC55         |
| YHR119W                                          | SET1          | YJL168C                 | SET2          |
| YBR042C                                          | CST26         | YDR385W                 | EFT2          |
| YOR332W                                          | VMA4          | YLR447C                 | VMA6          |
| YOR023C                                          | AHC1          | YNL107W                 | YAF9          |
| YDR443C                                          | SSN2          | YNL087W                 | TCB2          |
| YMR198W                                          | CIK1          | YKR014C                 | YPT52         |
| YML016C                                          | PPZ1          | YHL011C                 | PRS3          |
| YHL020C                                          | OPI1          | YPL120W                 | VPS30         |
| YLR371W                                          | ROM2          | YJL183W                 | MNN11         |

| Predictions at threshold level 0.80 continued... |               |                         |               |
|--------------------------------------------------|---------------|-------------------------|---------------|
| Gene1 of predicted pair                          |               | Gene2 of predicted pair |               |
| Systematic Name                                  | Standard Name | Systematic Name         | Standard Name |
| YDR479C                                          | PEX29         | YBR168W                 | PEX32         |
| YDR293C                                          | SSD1          | YGL054C                 | ERV14         |
| YLR083C                                          | EMP70         | YDR207C                 | UME6          |
| YDR320C                                          | SWA2          | YDR153C                 | ENT5          |
| YGL153W                                          | PEX14         | YGR135W                 | PRE9          |
| YMR224C                                          | MRE11         | YBR082C                 | UBC4          |
| YLR090W                                          | XDJ1          | YGR249W                 | MGA1          |
| YFR036W                                          | CDC26         | YDR207C                 | UME6          |
| YDR174W                                          | HMO1          | YPL152W                 | RRD2          |
| YLR441C                                          | RPS1A         | YFR036W                 | CDC26         |
| YNL041C                                          | COG6          | YCR053W                 | THR4          |
| YJR063W                                          | RPA12         | YGR188C                 | BUB1          |
| YGR261C                                          | APL6          | YDL077C                 | VAM6          |
| YOR083W                                          | WHI5          | YPL106C                 | SSE1          |
| YBR173C                                          | UMP1          | YHR200W                 | RPN10         |
| YOR275C                                          | RIM20         | YJL183W                 | MNN11         |
| YGR249W                                          | MGA1          | YNL076W                 | MKS1          |
| YCR077C                                          | PAT1          | YJL183W                 | MNN11         |
| YJL124C                                          | LSM1          | YJR035W                 | RAD26         |
| YMR095C                                          | SNO1          | YBR280C                 | SAF1          |
| YOR337W                                          | TEA1          | YER044C                 | ERG28         |
| YNL215W                                          | IES2          | YDR183W                 | PLP1          |
| YKR001C                                          | VPS1          | YOR036W                 | PEP12         |
| YLR095C                                          | IOC2          | YLR320W                 | MMS22         |
| YMR152W                                          | YIM1          | YDR310C                 | SUM1          |
| YMR080C                                          | NAM7          | YGR072W                 | UPF3          |
| YPL018W                                          | CTF19         | YDR183W                 | PLP1          |
| YLL007C                                          | YLL007C       | YLR360W                 | VPS38         |
| YLR090W                                          | XDJ1          | YMR026C                 | PEX12         |

| Predictions at threshold level 0.80 continued... |               |                         |               |
|--------------------------------------------------|---------------|-------------------------|---------------|
| Gene1 of predicted pair                          |               | Gene2 of predicted pair |               |
| Systematic Name                                  | Standard Name | Systematic Name         | Standard Name |
| YMR201C                                          | RAD14         | YBR114W                 | RAD16         |
| YLR452C                                          | SST2          | YOL018C                 | TLG2          |
| YPL161C                                          | BEM4          | YOL081W                 | IRA2          |
| YGR054W                                          | YGR054W       | YDR183W                 | PLP1          |
| YLR381W                                          | CTF3          | YIL008W                 | URM1          |
| YJL190C                                          | RPS22A        | YHR114W                 | BZZ1          |
| YNL297C                                          | MON2          | YDR153C                 | ENT5          |
| YBL101C                                          | ECM21         | YJL095W                 | BCK1          |
| YLR337C                                          | VRP1          | YJR090C                 | GRR1          |
| YOL126C                                          | MDH2          | YMR153W                 | NUP53         |
| YGR249W                                          | MGA1          | YOR290C                 | SNF2          |
| YPR131C                                          | NAT3          | YPL256C                 | CLN2          |
| YFR032C-A                                        | RPL29         | YKR020W                 | VPS51         |
| YDL059C                                          | RAD59         | YOR368W                 | RAD17         |
| YOR047C                                          | STD1          | YDL194W                 | SNF3          |
| YHR134W                                          | WSS1          | YPR046W                 | MCM16         |
| YPL161C                                          | BEM4          | YJL095W                 | BCK1          |
| YDR129C                                          | SAC6          | YFR036W                 | CDC26         |
| YER120W                                          | SCS2          | YOL108C                 | INO4          |
| YGL175C                                          | SAE2          | YMR038C                 | CCS1          |
| YOL051W                                          | GAL11         | YLR182W                 | SWI6          |
| YMR231W                                          | PEP5          | YAL002W                 | VPS8          |
| YFR010W                                          | UBP6          | YNL307C                 | MCK1          |
| YDR293C                                          | SSD1          | YLR447C                 | VMA6          |
| YER139C                                          | YER139C       | YMR214W                 | SCJ1          |
| YGR003W                                          | CUL3          | YDR139C                 | RUB1          |
| YOR127W                                          | RGA1          | YMR004W                 | MVP1          |
| YER044C                                          | ERG28         | YDR310C                 | SUM1          |
| YGL147C                                          | RPL9A         | YMR153W                 | NUP53         |

| Predictions at threshold level 0.80 continued... |               |                         |               |
|--------------------------------------------------|---------------|-------------------------|---------------|
| Gene1 of predicted pair                          |               | Gene2 of predicted pair |               |
| Systematic Name                                  | Standard Name | Systematic Name         | Standard Name |
| YDR439W                                          | LRS4          | YFR030W                 | MET10         |
| YMR164C                                          | MSS11         | YCR024C-A               | PMP1          |
| YLR233C                                          | EST1          | YDR310C                 | SUM1          |
| YPL057C                                          | SUR1          | YKL213C                 | DOA1          |
| YLL007C                                          | YLL007C       | YPR051W                 | MAK3          |
| YDR146C                                          | SWI5          | YOR043W                 | WHI2          |
| YMR216C                                          | SKY1          | YGR006W                 | PRP18         |
| YHR152W                                          | SPO12         | YPR111W                 | DBF20         |
| YNL041C                                          | COG6          | YLR093C                 | NYV1          |
| YFL013C                                          | IES1          | YOR308C                 | SNU66         |
| YHR111W                                          | UBA4          | YJL187C                 | SWE1          |
| YOR106W                                          | VAM3          | YEL043W                 | YEL043W       |
| YNL069C                                          | RPL16B        | YOR109W                 | INP53         |
| YPR131C                                          | NAT3          | YDR076W                 | RAD55         |
| YDR443C                                          | SSN2          | YLR360W                 | VPS38         |
| YGL133W                                          | ITC1          | YOR195W                 | SLK19         |
| YBR171W                                          | SEC66         | YGL115W                 | SNF4          |
| YOR290C                                          | SNF2          | YLR452C                 | SST2          |
| YOL051W                                          | GAL11         | YDL005C                 | MED2          |
| YPR131C                                          | NAT3          | YBL079W                 | NUP170        |
| YDR129C                                          | SAC6          | YML097C                 | VPS9          |
| YPR036W                                          | VMA13         | YOR327C                 | SNC2          |
| YBL051C                                          | PIN4          | YDR310C                 | SUM1          |
| YDR137W                                          | RGP1          | YDR378C                 | LSM6          |
| YDL056W                                          | MBP1          | YLR182W                 | SWI6          |
| YER042W                                          | MXR1          | YLR093C                 | NYV1          |
| YDR443C                                          | SSN2          | YDR261C                 | EXG2          |
| YIL103W                                          | DPH1          | YDR289C                 | RTT103        |
| YKR046C                                          | PET10         | YMR313C                 | TGL3          |

| Predictions at threshold level 0.80 continued... |               |                         |               |
|--------------------------------------------------|---------------|-------------------------|---------------|
| Gene1 of predicted pair                          |               | Gene2 of predicted pair |               |
| Systematic Name                                  | Standard Name | Systematic Name         | Standard Name |
| YPL240C                                          | HSP82         | YDR026C                 | YDR026C       |
| YGR019W                                          | UGA1          | YBR107C                 | IML3          |
| YCR066W                                          | RAD18         | YEL051W                 | VMA8          |
| YNL166C                                          | BNI5          | YGR054W                 | YGR054W       |
| YNL218W                                          | MGS1          | YKR072C                 | SIS2          |
| YIL159W                                          | BNR1          | YML001W                 | YPT7          |
| YGR020C                                          | VMA7          | YNL107W                 | YAF9          |
| YOR014W                                          | RTS1          | YDR207C                 | UME6          |
| YEL053C                                          | MAK10         | YJL183W                 | MNN11         |
| YJL172W                                          | CPS1          | YDL083C                 | RPS16B        |
| YOR066W                                          | MSA1          | YBL025W                 | RRN10         |
| YIL038C                                          | NOT3          | YBR089C-A               | NHP6B         |
| YNL297C                                          | MON2          | YOL108C                 | INO4          |
| YHR156C                                          | LIN1          | YBR200W                 | BEM1          |
| YNL025C                                          | SSN8          | YDL002C                 | NHP10         |
| YJR099W                                          | YUH1          | YDR139C                 | RUB1          |
| YNL248C                                          | RPA49         | YML112W                 | CTK3          |
| YIR005W                                          | IST3          | YDR289C                 | RTT103        |
| YKL032C                                          | IXR1          | YPL213W                 | LEA1          |
| YMR179W                                          | SPT21         | YGL163C                 | RAD54         |
| YKL126W                                          | YPK1          | YPL161C                 | BEM4          |
| YGR072W                                          | UPF3          | YNL238W                 | KEX2          |
| YJL053W                                          | PEP8          | YGL054C                 | ERV14         |
| YHR052W                                          | CIC1          | YPR154W                 | PIN3          |
| YMR199W                                          | CLN1          | YKL032C                 | IXR1          |
| YHR098C                                          | SFB3          | YMR048W                 | CSM3          |
| YFR036W                                          | CDC26         | YBR280C                 | SAF1          |
| YMR142C                                          | RPL13B        | YOR327C                 | SNC2          |
| YLL007C                                          | YLL007C       | YBR108W                 | YBR108W       |

| Predictions at threshold level 0.80 continued... |               |                         |               |
|--------------------------------------------------|---------------|-------------------------|---------------|
| Gene1 of predicted pair                          |               | Gene2 of predicted pair |               |
| Systematic Name                                  | Standard Name | Systematic Name         | Standard Name |
| YGL250W                                          | RMR1          | YDR318W                 | MCM21         |
| YLR090W                                          | XDJ1          | YLR095C                 | IOC2          |
| YOR132W                                          | VPS17         | YDR144C                 | MKC7          |
| YJR060W                                          | CBF1          | YOR327C                 | SNC2          |
| YNL041C                                          | COG6          | YPR030W                 | CSR2          |
| YNL248C                                          | RPA49         | YOL081W                 | IRA2          |
| YFR031C-A                                        | RPL2A         | YIL053W                 | RHR2          |
| YNL291C                                          | MID1          | YOR327C                 | SNC2          |
| YOR270C                                          | VPH1          | YKL119C                 | VPH2          |
| YOR112W                                          | CEX1          | YDR108W                 | GSG1          |
| YDR183W                                          | PLP1          | YNL107W                 | YAF9          |
| YDR225W                                          | HTA1          | YNL107W                 | YAF9          |
| YEL042W                                          | GDA1          | YER122C                 | GLO3          |
| YGL087C                                          | MMS2          | YMR172W                 | HOT1          |
| YPL057C                                          | SUR1          | YML028W                 | TSA1          |
| YER110C                                          | KAP123        | YDR254W                 | CHL4          |
| YMR284W                                          | YKU70         | YGL175C                 | SAE2          |
| YHR039C-A                                        | VMA10         | YML001W                 | YPT7          |
| YKL048C                                          | ELM1          | YBR036C                 | CSG2          |
| YGR135W                                          | PRE9          | YKR030W                 | GMH1          |
| YOR043W                                          | WHI2          | YGR071C                 | YGR071C       |
| YLR441C                                          | RPS1A         | YER102W                 | RPS8B         |
| YIL076W                                          | SEC28         | YMR133W                 | REC114        |
| YJR140C                                          | HIR3          | YGL148W                 | ARO2          |
| YPR051W                                          | MAK3          | YCL001W                 | RER1          |
| YML115C                                          | VAN1          | YGR217W                 | CCH1          |
| YGR241C                                          | YAP1802       | YDL226C                 | GCS1          |
| YLR292C                                          | SEC72         | YMR127C                 | SAS2          |
| YPR084W                                          | YPR084W       | YHR060W                 | VMA22         |

| Predictions at threshold level 0.80 continued... |               |                         |               |
|--------------------------------------------------|---------------|-------------------------|---------------|
| Gene1 of predicted pair                          |               | Gene2 of predicted pair |               |
| Systematic Name                                  | Standard Name | Systematic Name         | Standard Name |
| YEL051W                                          | VMA8          | YKR030W                 | GMH1          |
| YEL009C                                          | GCN4          | YNL236W                 | SIN4          |
| YJL127C                                          | SPT10         | YPL253C                 | VIK1          |
| YNL243W                                          | SLA2          | YMR070W                 | MOT3          |
| YPL057C                                          | SUR1          | YJL095W                 | BCK1          |
| YJL172W                                          | CPS1          | YGL124C                 | MON1          |
| YLR429W                                          | CRN1          | YNL107W                 | YAF9          |
| YKL032C                                          | IXR1          | YGL153W                 | PEX14         |
| YAL020C                                          | ATS1          | YJL095W                 | BCK1          |
| YBR200W                                          | BEM1          | YER139C                 | YER139C       |
| YHR073W                                          | OSH3          | YLR079W                 | SIC1          |
| YML071C                                          | COG8          | YBR082C                 | UBC4          |
| YNL215W                                          | IES2          | YIR005W                 | IST3          |
| YBR041W                                          | FAT1          | YJL117W                 | PHO86         |
| YCL037C                                          | SRO9          | YPL161C                 | BEM4          |
| YKL110C                                          | KTI12         | YPL018W                 | CTF19         |
| YBR194W                                          | SOY1          | YMR089C                 | YTA12         |
| YGL115W                                          | SNF4          | YMR311C                 | GLC8          |
| YDR260C                                          | SWM1          | YJR135C                 | MCM22         |
| YPL042C                                          | SSN3          | YNL236W                 | SIN4          |
| YJL095W                                          | BCK1          | YLR180W                 | SAM1          |
| YIR003W                                          | YIR003W       | YNL094W                 | APP1          |
| YNL238W                                          | KEX2          | YNL076W                 | MKS1          |
| YLR181C                                          | VTA1          | YKL041W                 | VPS24         |
| YFR031C-A                                        | RPL2A         | YPL195W                 | APL5          |
| YPL161C                                          | BEM4          | YNL289W                 | PCL1          |
| YFR031C-A                                        | RPL2A         | YKL126W                 | YPK1          |
| YOL051W                                          | GAL11         | YNL079C                 | TPM1          |
| YPL042C                                          | SSN3          | YML062C                 | MFT1          |

| Predictions at threshold level 0.80 continued... |               |                         |               |
|--------------------------------------------------|---------------|-------------------------|---------------|
| Gene1 of predicted pair                          |               | Gene2 of predicted pair |               |
| Systematic Name                                  | Standard Name | Systematic Name         | Standard Name |
| YDR477W                                          | SNF1          | YBR019C                 | GAL10         |
| YJR140C                                          | HIR3          | YBR036C                 | CSG2          |
| YOL018C                                          | TLG2          | YJL164C                 | TPK1          |
| YAL024C                                          | LTE1          | YDR378C                 | LSM6          |
| YKR057W                                          | RPS21A        | YGL163C                 | RAD54         |
| YGL178W                                          | MPT5          | YPL161C                 | BEM4          |
| YAL024C                                          | LTE1          | YBL025W                 | RRN10         |
| YNL293W                                          | MSB3          | YGR152C                 | RSR1          |
| YHR073W                                          | OSH3          | YGL016W                 | KAP122        |
| YEL043W                                          | YEL043W       | YER122C                 | GLO3          |
| YPL253C                                          | VIK1          | YHL002W                 | HSE1          |
| YPL057C                                          | SUR1          | YLR370C                 | ARC18         |
| YIL076W                                          | SEC28         | YGL223C                 | COG1          |
| YML013W                                          | UBX2          | YHR012W                 | VPS29         |
| YLR258W                                          | GSY2          | YPR119W                 | CLB2          |
| YER044C                                          | ERG28         | YOL121C                 | RPS19A        |
| YDR202C                                          | RAV2          | YNR032W                 | PPG1          |
| YDR183W                                          | PLP1          | YGR188C                 | BUB1          |
| YGL033W                                          | HOP2          | YMR152W                 | YIM1          |
| YJL115W                                          | ASF1          | YHR056C                 | RSC30         |
| YKL116C                                          | PRR1          | YML071C                 | COG8          |
| YMR224C                                          | MRE11         | YMR133W                 | REC114        |
| YER044C                                          | ERG28         | YOR327C                 | SNC2          |
| YJL154C                                          | VPS35         | YER162C                 | RAD4          |
| YLR083C                                          | EMP70         | YDR310C                 | SUM1          |
| YMR127C                                          | SAS2          | YMR055C                 | BUB2          |
| YMR224C                                          | MRE11         | YIR005W                 | IST3          |
| YBR036C                                          | CSG2          | YGR188C                 | BUB1          |
| YER044C                                          | ERG28         | YLR093C                 | NYV1          |



| Predictions at threshold level 0.80 continued... |               |                         |               |
|--------------------------------------------------|---------------|-------------------------|---------------|
| Gene1 of predicted pair                          |               | Gene2 of predicted pair |               |
| Systematic Name                                  | Standard Name | Systematic Name         | Standard Name |
| YBL003C                                          | HTA2          | YOR141C                 | ARP8          |
| YOR043W                                          | WHI2          | YOR368W                 | RAD17         |
| YMR216C                                          | SKY1          | YAL002W                 | VPS8          |
| YDL184C                                          | RPL41A        | YGL025C                 | PGD1          |
| YIR002C                                          | MPH1          | YPL022W                 | RAD1          |
| YLR447C                                          | VMA6          | YCR086W                 | CSM1          |
| YHR161C                                          | YAP1801       | YLR206W                 | ENT2          |
| YDR183W                                          | PLP1          | YJR090C                 | GRR1          |
| YKL126W                                          | YPK1          | YBR019C                 | GAL10         |
| YMR026C                                          | PEX12         | YBR200W                 | BEM1          |
| YJL154C                                          | VPS35         | YDR144C                 | MKC7          |
| YLR381W                                          | CTF3          | YHR115C                 | DMA1          |
| YPR017C                                          | DSS4          | YMR216C                 | SKY1          |
| YFL023W                                          | BUD27         | YDL059C                 | RAD59         |
| YHR039C-A                                        | VMA10         | YDL006W                 | PTC1          |
| YAL014C                                          | SYN8          | YAL030W                 | SNC1          |
| YMR152W                                          | YIM1          | YMR311C                 | GLC8          |
| YHR039C-A                                        | VMA10         | YJR033C                 | RAV1          |
| YNL236W                                          | SIN4          | YLR357W                 | RSC2          |
| YOR080W                                          | DIA2          | YBL079W                 | NUP170        |
| YLR109W                                          | AHP1          | YLR093C                 | NYV1          |
| YDL002C                                          | NHP10         | YDR378C                 | LSM6          |
| YLL007C                                          | YLL007C       | YMR127C                 | SAS2          |
| YKL101W                                          | HSL1          | YHR115C                 | DMA1          |
| YPR084W                                          | YPR084W       | YLR315W                 | NKP2          |
| YKL116C                                          | PRR1          | YOR327C                 | SNC2          |
| YHR178W                                          | STB5          | YJL190C                 | RPS22A        |
| YHR178W                                          | STB5          | YGR054W                 | YGR054W       |
| YDR443C                                          | SSN2          | YPR036W                 | VMA13         |

| Predictions at threshold level 0.80 continued... |               |                         |               |
|--------------------------------------------------|---------------|-------------------------|---------------|
| Gene1 of predicted pair                          |               | Gene2 of predicted pair |               |
| Systematic Name                                  | Standard Name | Systematic Name         | Standard Name |
| YKR001C                                          | VPS1          | YPL045W                 | VPS16         |
| YHL031C                                          | GOS1          | YDL006W                 | PTC1          |
| YGL178W                                          | MPT5          | YPL086C                 | ELP3          |
| YPL057C                                          | SUR1          | YDR155C                 | CPR1          |
| YPR051W                                          | MAK3          | YJR060W                 | CBF1          |
| YOR290C                                          | SNF2          | YOR038C                 | HIR2          |
| YDL184C                                          | RPL41A        | YJR084W                 | CSN12         |
| YMR152W                                          | YIM1          | YLR398C                 | SKI2          |
| YBR173C                                          | UMP1          | YMR016C                 | SOK2          |
| YGL163C                                          | RAD54         | YLR254C                 | NDL1          |
| YMR172W                                          | HOT1          | YGR270W                 | YTA7          |
| YOR112W                                          | CEX1          | YHR012W                 | VPS29         |
| YHR134W                                          | WSS1          | YEL053C                 | MAK10         |
| YPR084W                                          | YPR084W       | YJR033C                 | RAV1          |
| YGL200C                                          | EMP24         | YNL079C                 | TPM1          |
| YMR167W                                          | MLH1          | YOL090W                 | MSH2          |
| YGL115W                                          | SNF4          | YBR019C                 | GAL10         |
| YER116C                                          | SLX8          | YJR135C                 | MCM22         |
| YEL051W                                          | VMA8          | YJR033C                 | RAV1          |
| YOR191W                                          | RIS1          | YGR072W                 | UPF3          |
| YNL032W                                          | SIW14         | YLR371W                 | ROM2          |
| YJL127C                                          | SPT10         | YDR254W                 | CHL4          |
| YBR195C                                          | MSI1          | YCR086W                 | CSM1          |
| YDR358W                                          | GGA1          | YLR370C                 | ARC18         |
| YMR224C                                          | MRE11         | YPL037C                 | EGD1          |
| YGR020C                                          | VMA7          | YAL002W                 | VPS8          |
| YDR225W                                          | HTA1          | YOR195W                 | SLK19         |
| YDR293C                                          | SSD1          | YNR052C                 | POP2          |
| YBL051C                                          | PIN4          | YMR202W                 | ERG2          |

| Predictions at threshold level 0.80 continued... |               |                         |               |
|--------------------------------------------------|---------------|-------------------------|---------------|
| Gene1 of predicted pair                          |               | Gene2 of predicted pair |               |
| Systematic Name                                  | Standard Name | Systematic Name         | Standard Name |
| YDL059C                                          | RAD59         | YPL256C                 | CLN2          |
| YEL053C                                          | MAK10         | YML071C                 | COG8          |
| YGR188C                                          | BUB1          | YHR115C                 | DMA1          |
| YPR036W                                          | VMA13         | YER162C                 | RAD4          |
| YJR056C                                          | YJR056C       | YLR180W                 | SAM1          |
| YLR447C                                          | VMA6          | YDR289C                 | RTT103        |
| YOR001W                                          | RRP6          | YJL124C                 | LSM1          |
| YNL238W                                          | KEX2          | YKR014C                 | YPT52         |
| YCR077C                                          | PAT1          | YER139C                 | YER139C       |
| YJR032W                                          | CPR7          | YBL025W                 | RRN10         |
| YCL045C                                          | YCL045C       | YML051W                 | GAL80         |
| YJL164C                                          | TPK1          | YDL047W                 | SIT4          |
| YLR234W                                          | TOP3          | YJL006C                 | CTK2          |
| YKL117W                                          | SBA1          | YGL016W                 | KAP122        |
| YMR095C                                          | SNO1          | YOR290C                 | SNF2          |
| YMR198W                                          | CIK1          | YDL127W                 | PCL2          |
| YGL208W                                          | SIP2          | YJR090C                 | GRR1          |
| YPL253C                                          | VIK1          | YCR086W                 | CSM1          |
| YDR363W-A                                        | SEM1          | YKL048C                 | ELM1          |
| YAL024C                                          | LTE1          | YML097C                 | VPS9          |
| YPL018W                                          | CTF19         | YOR014W                 | RTS1          |
| YCR053W                                          | THR4          | YMR230W                 | RPS10B        |
| YGR249W                                          | MGA1          | YML001W                 | YPT7          |
| YAL024C                                          | LTE1          | YGL147C                 | RPL9A         |
| YMR198W                                          | CIK1          | YDL013W                 | SLX5          |
| YDR004W                                          | RAD57         | YPR119W                 | CLB2          |
| YGL025C                                          | PGD1          | YFR036W                 | CDC26         |
| YPR120C                                          | CLB5          | YGL151W                 | NUT1          |
| YDR363W-A                                        | SEM1          | YPL256C                 | CLN2          |

| Predictions at threshold level 0.80 continued... |               |                         |               |
|--------------------------------------------------|---------------|-------------------------|---------------|
| Gene1 of predicted pair                          |               | Gene2 of predicted pair |               |
| Systematic Name                                  | Standard Name | Systematic Name         | Standard Name |
| YPL105C                                          | YPL105C       | YHR060W                 | VMA22         |
| YBR217W                                          | ATG12         | YKR099W                 | BAS1          |
| YNL087W                                          | TCB2          | YBR108W                 | YBR108W       |
| YMR004W                                          | MVP1          | YNL297C                 | MON2          |
| YLR381W                                          | CTF3          | YMR055C                 | BUB2          |
| YDL020C                                          | RPN4          | YGL066W                 | SGF73         |
| YMR004W                                          | MVP1          | YDR202C                 | RAV2          |
| YGL033W                                          | HOP2          | YOR327C                 | SNC2          |
| YIL034C                                          | CAP2          | YNL293W                 | MSB3          |
| YMR202W                                          | ERG2          | YJR005W                 | APL1          |
| YML038C                                          | YMD8          | YAL002W                 | VPS8          |
| YOR127W                                          | RGA1          | YEL056W                 | HAT2          |
| YGL135W                                          | RPL1B         | YJL095W                 | BCK1          |
| YGR040W                                          | KSS1          | YLR362W                 | STE11         |
| YGL087C                                          | MMS2          | YLR182W                 | SWI6          |
| YMR016C                                          | SOK2          | YMR133W                 | REC114        |
| YAR033W                                          | MST28         | YPL240C                 | HSP82         |
| YPL256C                                          | CLN2          | YML028W                 | TSA1          |
| YPL089C                                          | RLM1          | YKL161C                 | YKL161C       |
| YNL218W                                          | MGS1          | YDL020C                 | RPN4          |
| YER144C                                          | UBP5          | YDR261C                 | EXG2          |
| YNL291C                                          | MID1          | YEL043W                 | YEL043W       |
| YNL058C                                          | YNL058C       | YER162C                 | RAD4          |
| YNL041C                                          | COG6          | YOR327C                 | SNC2          |
| YKR030W                                          | GMH1          | YAL002W                 | VPS8          |
| YDR004W                                          | RAD57         | YDL155W                 | CLB3          |
| YIL053W                                          | RHR2          | YHR156C                 | LIN1          |
| YPR084W                                          | YPR084W       | YDL006W                 | PTC1          |
| YOR337W                                          | TEA1          | YLR093C                 | NYV1          |

| Predictions at threshold level 0.80 continued... |               |                         |               |
|--------------------------------------------------|---------------|-------------------------|---------------|
| Gene1 of predicted pair                          |               | Gene2 of predicted pair |               |
| Systematic Name                                  | Standard Name | Systematic Name         | Standard Name |
| YML097C                                          | VPS9          | YNL107W                 | YAF9          |
| YOR109W                                          | INP53         | YLR309C                 | IMH1          |
| YGR135W                                          | PRE9          | YDL047W                 | SIT4          |
| YPL096C-A                                        | ERI1          | YGL200C                 | EMP24         |
| YBR173C                                          | UMP1          | YBR200W                 | BEM1          |
| YBR215W                                          | HPC2          | YOR124C                 | UBP2          |
| YHR039C-A                                        | VMA10         | YJR084W                 | CSN12         |
| YLR192C                                          | HCR1          | YER162C                 | RAD4          |
| YGR135W                                          | PRE9          | YPR046W                 | MCM16         |
| YNL044W                                          | YIP3          | YGL200C                 | EMP24         |
| YNL297C                                          | MON2          | YEL051W                 | VMA8          |
| YNL238W                                          | KEX2          | YMR054W                 | STV1          |
| YFL013C                                          | IES1          | YDL002C                 | NHP10         |
| YBL017C                                          | PEP1          | YDR484W                 | VPS52         |
| YGL253W                                          | HXK2          | YGR188C                 | BUB1          |
| YMR109W                                          | MYO5          | YNL107W                 | YAF9          |
| YAL024C                                          | LTE1          | YLR093C                 | NYV1          |
| YJL172W                                          | CPS1          | YBR280C                 | SAF1          |
| YGR252W                                          | GCN5          | YHR158C                 | KEL1          |
| YMR164C                                          | MSS11         | YBR083W                 | TEC1          |
| YLR360W                                          | VPS38         | YJL190C                 | RPS22A        |
| YNL243W                                          | SLA2          | YPL051W                 | ARL3          |
| YAL024C                                          | LTE1          | YDR146C                 | SWI5          |
| YDR097C                                          | MSH6          | YOL090W                 | MSH2          |
| YPL198W                                          | RPL7B         | YOR078W                 | BUD21         |
| YPR120C                                          | CLB5          | YML028W                 | TSA1          |
| YMR152W                                          | YIM1          | YLR180W                 | SAM1          |
| YIR003W                                          | YIR003W       | YCR088W                 | ABP1          |
| YLR192C                                          | HCR1          | YHR200W                 | RPN10         |

| Predictions at threshold level 0.80 continued... |               |                         |               |
|--------------------------------------------------|---------------|-------------------------|---------------|
| Gene1 of predicted pair                          |               | Gene2 of predicted pair |               |
| Systematic Name                                  | Standard Name | Systematic Name         | Standard Name |
| YEL053C                                          | MAK10         | YPL234C                 | TFP3          |
| YDR129C                                          | SAC6          | YBR082C                 | UBC4          |
| YNL288W                                          | CAF40         | YPL018W                 | CTF19         |
| YNL307C                                          | MCK1          | YDR318W                 | MCM21         |
| YER114C                                          | BOI2          | YML109W                 | ZDS2          |
| YLR079W                                          | SIC1          | YFR030W                 | MET10         |
| YBR131W                                          | CCZ1          | YOR106W                 | VAM3          |
| YBR057C                                          | MUM2          | YBL101C                 | ECM21         |
| YPL256C                                          | CLN2          | YKL092C                 | BUD2          |
| YLR234W                                          | TOP3          | YML028W                 | TSA1          |
| YPL022W                                          | RAD1          | YDL059C                 | RAD59         |
| YML016C                                          | PPZ1          | YOL091W                 | SPO21         |
| YGL066W                                          | SGF73         | YFR036W                 | CDC26         |
| YJL170C                                          | ASG7          | YLR452C                 | SST2          |
| YNL032W                                          | SIW14         | YPR036W                 | VMA13         |
| YJL124C                                          | LSM1          | YGR270W                 | YTA7          |
| YGR209C                                          | TRX2          | YBR158W                 | AMN1          |
| YLR288C                                          | MEC3          | YPL022W                 | RAD1          |
| YML071C                                          | COG8          | YBL025W                 | RRN10         |
| YPL178W                                          | CBC2          | YPL246C                 | RBD2          |
| YJL036W                                          | SNX4          | YER122C                 | GLO3          |
| YGR108W                                          | CLB1          | YGL253W                 | HXK2          |
| YKL139W                                          | CTK1          | YDR439W                 | LRS4          |
| YGR270W                                          | YTA7          | YJL190C                 | RPS22A        |
| YKL160W                                          | ELF1          | YNL238W                 | KEX2          |
| YJL172W                                          | CPS1          | YHR060W                 | VMA22         |
| YMR095C                                          | SNO1          | YOR270C                 | VPH1          |
| YIL156W                                          | UBP7          | YMR125W                 | STO1          |
| YPR120C                                          | CLB5          | YOR141C                 | ARP8          |

| Predictions at threshold level 0.80 continued... |               |                         |               |
|--------------------------------------------------|---------------|-------------------------|---------------|
| Gene1 of predicted pair                          |               | Gene2 of predicted pair |               |
| Systematic Name                                  | Standard Name | Systematic Name         | Standard Name |
| YNL325C                                          | FIG4          | YLR180W                 | SAM1          |
| YOR109W                                          | INP53         | YER122C                 | GLO3          |
| YDR156W                                          | RPA14         | YIR005W                 | IST3          |
| YDR378C                                          | LSM6          | YLR350W                 | ORM2          |
| YDL020C                                          | RPN4          | YGR105W                 | VMA21         |
| YDR443C                                          | SSN2          | YLR386W                 | VAC14         |
| YOR069W                                          | VPS5          | YDR153C                 | ENT5          |
| YNR052C                                          | POP2          | YLR410W                 | VIP1          |
| YPL137C                                          | GIP3          | YLR398C                 | SKI2          |
| YGL115W                                          | SNF4          | YNL127W                 | FAR11         |
| YDL006W                                          | PTC1          | YMR038C                 | CCS1          |
| YJR060W                                          | CBF1          | YML071C                 | COG8          |
| YGL212W                                          | VAM7          | YDL192W                 | ARF1          |
| YER120W                                          | SCS2          | YNL107W                 | YAF9          |
| YOR071C                                          | THI71         | YDR105C                 | TMS1          |
| YHL031C                                          | GOS1          | YKR020W                 | VPS51         |
| YML103C                                          | NUP188        | YPR120C                 | CLB5          |
| YDR108W                                          | GSG1          | YNL107W                 | YAF9          |
| YHR119W                                          | SET1          | YPL240C                 | HSP82         |
| YLR135W                                          | SLX4          | YDR207C                 | UME6          |
| YOR033C                                          | EXO1          | YCR086W                 | CSM1          |
| YLR170C                                          | APS1          | YOR327C                 | SNC2          |
| YBL103C                                          | RTG3          | YNL307C                 | MCK1          |
| YBR057C                                          | MUM2          | YDL155W                 | CLB3          |
| YNL036W                                          | NCE103        | YPL240C                 | HSP82         |
| YIL076W                                          | SEC28         | YHR039C-A               | VMA10         |
| YEL043W                                          | YEL043W       | YDR207C                 | UME6          |
| YJL127C                                          | SPT10         | YDL047W                 | SIT4          |
| YIL053W                                          | RHR2          | YNR072W                 | HXT17         |

| Predictions at threshold level 0.80 continued... |               |                         |               |
|--------------------------------------------------|---------------|-------------------------|---------------|
| Gene1 of predicted pair                          |               | Gene2 of predicted pair |               |
| Systematic Name                                  | Standard Name | Systematic Name         | Standard Name |
| YPR017C                                          | DSS4          | YGL212W                 | VAM7          |
| YNL027W                                          | CRZ1          | YIL033C                 | BCY1          |
| YGL215W                                          | CLG1          | YGL200C                 | EMP24         |
| YDL232W                                          | OST4          | YOR085W                 | OST3          |
| YKL007W                                          | CAP1          | YOR367W                 | SCP1          |
| YLR079W                                          | SIC1          | YDR363W-A               | SEM1          |
| YLR370C                                          | ARC18         | YLR398C                 | SKI2          |
| YBL047C                                          | EDE1          | YHR013C                 | ARD1          |
| YDL184C                                          | RPL41A        | YGL124C                 | MON1          |
| YPL234C                                          | TFP3          | YNL238W                 | KEX2          |
| YHR134W                                          | WSS1          | YEL056W                 | HAT2          |
| YJR063W                                          | RPA12         | YNL107W                 | YAF9          |
| YEL053C                                          | MAK10         | YLR452C                 | SST2          |
| YDR477W                                          | SNF1          | YOL111C                 | MDY2          |
| YPL256C                                          | CLN2          | YDR207C                 | UME6          |
| YLR447C                                          | VMA6          | YDL077C                 | VAM6          |
| YKR020W                                          | VPS51         | YMR054W                 | STV1          |
| YNL291C                                          | MID1          | YKR030W                 | GMH1          |
| YPL096C-A                                        | ERI1          | YPL050C                 | MNN9          |
| YOL111C                                          | MDY2          | YER162C                 | RAD4          |
| YPL045W                                          | VPS16         | YLR093C                 | NYV1          |
| YGL025C                                          | PGD1          | YGL151W                 | NUT1          |
| YNL297C                                          | MON2          | YGL003C                 | CDH1          |
| YNL106C                                          | INP52         | YDR254W                 | CHL4          |
| YML099C                                          | ARG81         | YJR094C                 | IME1          |
| YLR095C                                          | IOC2          | YBR036C                 | CSG2          |
| YAL020C                                          | ATS1          | YHR115C                 | DMA1          |
| YDR335W                                          | MSN5          | YDR440W                 | DOT1          |
| YLR178C                                          | TFS1          | YOL081W                 | IRA2          |



| Predictions at threshold level 0.80 continued... |               |                         |               |
|--------------------------------------------------|---------------|-------------------------|---------------|
| Gene1 of predicted pair                          |               | Gene2 of predicted pair |               |
| Systematic Name                                  | Standard Name | Systematic Name         | Standard Name |
| YJL210W                                          | PEX2          | YNL214W                 | PEX17         |
| YER096W                                          | SHC1          | YDR289C                 | RTT103        |
| YGL087C                                          | MMS2          | YBR114W                 | RAD16         |
| YNL215W                                          | IES2          | YLR350W                 | ORM2          |
| YBL021C                                          | HAP3          | YBR114W                 | RAD16         |
| YOR112W                                          | CEX1          | YML038C                 | YMD8          |
| YGR072W                                          | UPF3          | YMR216C                 | SKY1          |
| YHR152W                                          | SPO12         | YPR119W                 | CLB2          |
| YOR195W                                          | SLK19         | YJR035W                 | RAD26         |
| YBL051C                                          | PIN4          | YHR111W                 | UBA4          |
| YLL007C                                          | YLL007C       | YIL034C                 | CAP2          |
| YDR484W                                          | VPS52         | YDR323C                 | PEP7          |
| YDR293C                                          | SSD1          | YLR381W                 | CTF3          |
| YOR337W                                          | TEA1          | YHR060W                 | VMA22         |
| YKL010C                                          | UFD4          | YPL213W                 | LEA1          |
| YLR320W                                          | MMS22         | YNL076W                 | MKS1          |
| YLR206W                                          | ENT2          | YBL106C                 | SRO77         |
| YOR337W                                          | TEA1          | YOR035C                 | SHE4          |
| YCR053W                                          | THR4          | YLR180W                 | SAM1          |
| YNL068C                                          | FKH2          | YBR084C-A               | RPL19A        |
| YDR254W                                          | CHL4          | YGL115W                 | SNF4          |
| YOL121C                                          | RPS19A        | YBR036C                 | CSG2          |
| YCR024C-A                                        | PMP1          | YGR059W                 | SPR3          |
| YOR106W                                          | VAM3          | YCL037C                 | SRO9          |
| YPL120W                                          | VPS30         | YNR032W                 | PPG1          |
| YNL069C                                          | RPL16B        | YAL002W                 | VPS8          |
| YFR036W                                          | CDC26         | YDL192W                 | ARF1          |
| YIL076W                                          | SEC28         | YPR051W                 | MAK3          |
| YBR057C                                          | MUM2          | YAR014C                 | BUD14         |

| Predictions at threshold level 0.80 continued... |               |                         |               |
|--------------------------------------------------|---------------|-------------------------|---------------|
| Gene1 of predicted pair                          |               | Gene2 of predicted pair |               |
| Systematic Name                                  | Standard Name | Systematic Name         | Standard Name |
| YDR254W                                          | CHL4          | YDR183W                 | PLP1          |
| YDR202C                                          | RAV2          | YML071C                 | COG8          |
| YLR386W                                          | VAC14         | YHR081W                 | LRP1          |
| YIL053W                                          | RHR2          | YGL003C                 | CDH1          |
| YJR060W                                          | CBF1          | YIR005W                 | IST3          |
| YLR452C                                          | SST2          | YDR358W                 | GGA1          |
| YLL039C                                          | UBI4          | YLR128W                 | DCN1          |
| YKL048C                                          | ELM1          | YKR048C                 | NAP1          |
| YGR249W                                          | MGA1          | YBR030W                 | YBR030W       |
| YER120W                                          | SCS2          | YDL006W                 | PTC1          |
| YJR084W                                          | CSN12         | YGL124C                 | MON1          |
| YBR215W                                          | HPC2          | YDR318W                 | MCM21         |
| YOL100W                                          | PKH2          | YPL004C                 | LSP1          |
| YFR031C-A                                        | RPL2A         | YMR016C                 | SOK2          |
| YNL236W                                          | SIN4          | YPL106C                 | SSE1          |
| YBL058W                                          | SHP1          | YBR173C                 | UMP1          |
| YDR004W                                          | RAD57         | YGL249W                 | ZIP2          |
| YJL124C                                          | LSM1          | YLR429W                 | CRN1          |
| YGL066W                                          | SGF73         | YBR010W                 | HHT1          |
| YBR215W                                          | HPC2          | YKL160W                 | ELF1          |
| YHR039C-A                                        | VMA10         | YCR053W                 | THR4          |
| YNL145W                                          | MFA2          | YPL220W                 | RPL1A         |
| YNL307C                                          | MCK1          | YDR310C                 | SUM1          |
| YDR202C                                          | RAV2          | YDL185W                 | TFP1          |
| YJL058C                                          | BIT61         | YMR055C                 | BUB2          |
| YAL020C                                          | ATS1          | YMR202W                 | ERG2          |
| YJR040W                                          | GEF1          | YCR066W                 | RAD18         |
| YDR174W                                          | HMO1          | YOR195W                 | SLK19         |
| YOR358W                                          | HAP5          | YFL047W                 | RGD2          |

| Predictions at threshold level 0.80 continued... |               |                         |               |
|--------------------------------------------------|---------------|-------------------------|---------------|
| Gene1 of predicted pair                          |               | Gene2 of predicted pair |               |
| Systematic Name                                  | Standard Name | Systematic Name         | Standard Name |
| YER139C                                          | YER139C       | YJL095W                 | BCK1          |
| YKL213C                                          | DOA1          | YIR005W                 | IST3          |
| YFR010W                                          | UBP6          | YLR093C                 | NYV1          |
| YFR031C-A                                        | RPL2A         | YOR327C                 | SNC2          |
| YNL297C                                          | MON2          | YGL115W                 | SNF4          |
| YNL288W                                          | CAF40         | YPL203W                 | TPK2          |
| YMR116C                                          | ASC1          | YNL016W                 | PUB1          |
| YOL030W                                          | GAS5          | YLR410W                 | VIP1          |
| YBL051C                                          | PIN4          | YNL289W                 | PCL1          |
| YDR443C                                          | SSN2          | YKL116C                 | PRR1          |
| YLR240W                                          | VPS34         | YOL018C                 | TLG2          |
| YDR174W                                          | HMO1          | YLR381W                 | CTF3          |
| YOR109W                                          | INP53         | YDR153C                 | ENT5          |
| YHR178W                                          | STB5          | YHL002W                 | HSE1          |
| YPL037C                                          | EGD1          | YOL018C                 | TLG2          |
| YLR119W                                          | SRN2          | YNL076W                 | MKS1          |
| YHR200W                                          | RPN10         | YBR280C                 | SAF1          |
| YDR448W                                          | ADA2          | YGR252W                 | GCN5          |
| YNL199C                                          | GCR2          | YHR167W                 | THP2          |
| YDR293C                                          | SSD1          | YCL037C                 | SRO9          |
| YPR120C                                          | CLB5          | YAR014C                 | BUD14         |
| YLR381W                                          | CTF3          | YGL163C                 | RAD54         |
| YGR184C                                          | UBR1          | YPL018W                 | CTF19         |
| YJL176C                                          | SWI3          | YGR135W                 | PRE9          |
| YML058W                                          | SML1          | YML095C                 | RAD10         |
| YJR135C                                          | MCM22         | YFR036W                 | CDC26         |
| YJL036W                                          | SNX4          | YCL037C                 | SRO9          |
| YNL297C                                          | MON2          | YGL054C                 | ERV14         |
| YKL139W                                          | CTK1          | YER144C                 | UBP5          |

| Predictions at threshold level 0.80 continued... |               |                         |               |
|--------------------------------------------------|---------------|-------------------------|---------------|
| Gene1 of predicted pair                          |               | Gene2 of predicted pair |               |
| Systematic Name                                  | Standard Name | Systematic Name         | Standard Name |
| YBR200W                                          | BEM1          | YLR315W                 | NKP2          |
| YHR156C                                          | LIN1          | YCR053W                 | THR4          |
| YPL158C                                          | YPL158C       | YHR108W                 | GGA2          |
| YDR484W                                          | VPS52         | YLR441C                 | RPS1A         |
| YMR095C                                          | SNO1          | YDL184C                 | RPL41A        |
| YDR385W                                          | EFT2          | YKL041W                 | VPS24         |
| YDR156W                                          | RPA14         | YIL036W                 | CST6          |
| YLR337C                                          | VRP1          | YBL072C                 | RPS8A         |
| YGR108W                                          | CLB1          | YHR134W                 | WSS1          |
| YIL156W                                          | UBP7          | YER110C                 | KAP123        |
| YLR360W                                          | VPS38         | YPL120W                 | VPS30         |
| YOL121C                                          | RPS19A        | YEL060C                 | PRB1          |
| YOR023C                                          | AHC1          | YML095C                 | RAD10         |
| YMR116C                                          | ASC1          | YMR089C                 | YTA12         |
| YGR104C                                          | SRB5          | YHR167W                 | THP2          |
| YDR171W                                          | HSP42         | YLR370C                 | ARC18         |
| YGL133W                                          | ITC1          | YML095C                 | RAD10         |
| YNL215W                                          | IES2          | YJR060W                 | CBF1          |
| YFR031C-A                                        | RPL2A         | YBR200W                 | BEM1          |
| YKL126W                                          | YPK1          | YHR060W                 | VMA22         |
| YDR129C                                          | SAC6          | YMR231W                 | PEP5          |
| YKL032C                                          | IXR1          | YDR363W-A               | SEM1          |
| YHR086W                                          | NAM8          | YKL074C                 | MUD2          |
| YCR034W                                          | FEN1          | YJR032W                 | CPR7          |
| YPR120C                                          | CLB5          | YPR119W                 | CLB2          |
| YBR215W                                          | HPC2          | YJR035W                 | RAD26         |
| YKR057W                                          | RPS21A        | YML095C                 | RAD10         |
| YBL021C                                          | HAP3          | YPL018W                 | CTF19         |
| YEL053C                                          | MAK10         | YHR081W                 | LRP1          |

| Predictions at threshold level 0.80 continued... |               |                         |               |
|--------------------------------------------------|---------------|-------------------------|---------------|
| Gene1 of predicted pair                          |               | Gene2 of predicted pair |               |
| Systematic Name                                  | Standard Name | Systematic Name         | Standard Name |
| YPL037C                                          | EGD1          | YER120W                 | SCS2          |
| YDR469W                                          | SDC1          | YEL056W                 | HAT2          |
| YBR173C                                          | UMP1          | YOR270C                 | VPH1          |
| YBR107C                                          | IML3          | YDR318W                 | MCM21         |
| YPL161C                                          | BEM4          | YNL079C                 | TPM1          |
| YJR035W                                          | RAD26         | YGL031C                 | RPL24A        |
| YJR140C                                          | HIR3          | YGL250W                 | RMR1          |
| YKL038W                                          | RGT1          | YBR112C                 | CYC8          |
| YMR055C                                          | BUB2          | YMR038C                 | CCS1          |
| YGL033W                                          | HOP2          | YNL307C                 | MCK1          |
| YHR012W                                          | VPS29         | YOL108C                 | INO4          |
| YJR056C                                          | YJR056C       | YBR280C                 | SAF1          |
| YKL126W                                          | YPK1          | YLR425W                 | TUS1          |
| YML095C                                          | RAD10         | YDR254W                 | CHL4          |
| YKL214C                                          | YRA2          | YHR167W                 | THP2          |
| YMR054W                                          | STV1          | YJR033C                 | RAV1          |
| YKL126W                                          | YPK1          | YNL041C                 | COG6          |
| YLR090W                                          | XDJ1          | YDL184C                 | RPL41A        |
| YGR261C                                          | APL6          | YEL051W                 | VMA8          |
| YOR337W                                          | TEA1          | YOR043W                 | WHI2          |
| YMR224C                                          | MRE11         | YOR308C                 | SNU66         |
| YDL116W                                          | NUP84         | YEL050C                 | RML2          |
| YBL047C                                          | EDE1          | YJL095W                 | BCK1          |
| YIL033C                                          | BCY1          | YPL018W                 | CTF19         |
| YFL013C                                          | IES1          | YJR140C                 | HIR3          |
| YGR249W                                          | MGA1          | YOR043W                 | WHI2          |
| YNL206C                                          | RTT106        | YOR038C                 | HIR2          |
| YMR055C                                          | BUB2          | YJR035W                 | RAD26         |
| YDR293C                                          | SSD1          | YPL256C                 | CLN2          |

| Predictions at threshold level 0.80 continued... |               |                         |               |
|--------------------------------------------------|---------------|-------------------------|---------------|
| Gene1 of predicted pair                          |               | Gene2 of predicted pair |               |
| Systematic Name                                  | Standard Name | Systematic Name         | Standard Name |
| YBL101C                                          | ECM21         | YHL002W                 | HSE1          |
| YLR119W                                          | SRN2          | YER122C                 | GLO3          |
| YGR072W                                          | UPF3          | YER122C                 | GLO3          |
| YNL291C                                          | MID1          | YML071C                 | COG8          |
| YDR156W                                          | RPA14         | YBL101C                 | ECM21         |
| YNL041C                                          | COG6          | YDR469W                 | SDC1          |
| YDR389W                                          | SAC7          | YOR035C                 | SHE4          |
| YML016C                                          | PPZ1          | YNL107W                 | YAF9          |
| YNL058C                                          | YNL058C       | YEL060C                 | PRB1          |
| YHR013C                                          | ARD1          | YKL101W                 | HSL1          |
| YFL033C                                          | RIM15         | YGL054C                 | ERV14         |
| YLR292C                                          | SEC72         | YPL161C                 | BEM4          |
| YOR043W                                          | WHI2          | YER161C                 | SPT2          |
| YER144C                                          | UBP5          | YBR171W                 | SEC66         |
| YML117W                                          | NAB6          | YHR200W                 | RPN10         |
| YLR083C                                          | EMP70         | YNL291C                 | MID1          |
| YDR004W                                          | RAD57         | YML095C                 | RAD10         |
| YMR167W                                          | MLH1          | YOR368W                 | RAD17         |
| YPL115C                                          | BEM3          | YDR183W                 | PLP1          |
| YGR054W                                          | YGR054W       | YHR114W                 | BZZ1          |
| YGL135W                                          | RPL1B         | YDR358W                 | GGA1          |
| YBR108W                                          | YBR108W       | YEL053C                 | MAK10         |
| YGL147C                                          | RPL9A         | YER162C                 | RAD4          |
| YBL027W                                          | RPL19B        | YGR188C                 | BUB1          |
| YLR288C                                          | MEC3          | YMR198W                 | CIK1          |
| YPR131C                                          | NAT3          | YMR202W                 | ERG2          |
| YOR106W                                          | VAM3          | YJR033C                 | RAV1          |
| YOR145C                                          | PNO1          | YOR001W                 | RRP6          |
| YKR035W-A                                        | DID2          | YNL076W                 | MKS1          |

| Predictions at threshold level 0.80 continued... |               |                         |               |
|--------------------------------------------------|---------------|-------------------------|---------------|
| Gene1 of predicted pair                          |               | Gene2 of predicted pair |               |
| Systematic Name                                  | Standard Name | Systematic Name         | Standard Name |
| YGR078C                                          | PAC10         | YEL022W                 | GEA2          |
| YHR111W                                          | UBA4          | YKR048C                 | NAP1          |
| YHL027W                                          | RIM101        | YER122C                 | GLO3          |
| YDR174W                                          | HMO1          | YGL163C                 | RAD54         |
| YJR056C                                          | YJR056C       | YHR081W                 | LRP1          |
| YBL051C                                          | PIN4          | YLR381W                 | CTF3          |
| YCR020C-A                                        | MAK31         | YCL037C                 | SRO9          |
| YLR360W                                          | VPS38         | YAR014C                 | BUD14         |
| YOR327C                                          | SNC2          | YNR049C                 | MSO1          |
| YDR335W                                          | MSN5          | YGL003C                 | CDH1          |
| YHR158C                                          | KEL1          | YOL081W                 | IRA2          |
| YGL025C                                          | PGD1          | YNL236W                 | SIN4          |
| YDR202C                                          | RAV2          | YML001W                 | YPT7          |
| YCR088W                                          | ABP1          | YOR035C                 | SHE4          |
| YML115C                                          | VAN1          | YOR140W                 | SFL1          |
| YLR447C                                          | VMA6          | YHL002W                 | HSE1          |
| YIL002C                                          | INP51         | YDR080W                 | VPS41         |
| YGR184C                                          | UBR1          | YDR254W                 | CHL4          |
| YNL041C                                          | COG6          | YKL119C                 | VPH2          |
| YKL126W                                          | YPK1          | YDL192W                 | ARF1          |
| YDR448W                                          | ADA2          | YNL031C                 | HHT2          |
| YBL102W                                          | SFT2          | YNL107W                 | YAF9          |
| YLR102C                                          | APC9          | YKL048C                 | ELM1          |
| YPL161C                                          | BEM4          | YEL060C                 | PRB1          |
| YPL022W                                          | RAD1          | YPL018W                 | CTF19         |
| YNL215W                                          | IES2          | YNL225C                 | CNM67         |
| YDL005C                                          | MED2          | YJL140W                 | RPB4          |
| YOR039W                                          | CKB2          | YOR368W                 | RAD17         |
| YKR072C                                          | SIS2          | YDL013W                 | SLX5          |

| Predictions at threshold level 0.80 continued... |               |                         |               |
|--------------------------------------------------|---------------|-------------------------|---------------|
| Gene1 of predicted pair                          |               | Gene2 of predicted pair |               |
| Systematic Name                                  | Standard Name | Systematic Name         | Standard Name |
| YAL024C                                          | LTE1          | YML112W                 | CTK3          |
| YOR132W                                          | VPS17         | YJL204C                 | RCY1          |
| YMR133W                                          | REC114        | YDR310C                 | SUM1          |
| YKL025C                                          | PAN3          | YPR051W                 | MAK3          |
| YBR217W                                          | ATG12         | YLR094C                 | GIS3          |
| YMR152W                                          | YIM1          | YJL095W                 | BCK1          |
| YOR243C                                          | PUS7          | YHR167W                 | THP2          |
| YML099C                                          | ARG81         | YMR042W                 | ARG80         |
| YDR245W                                          | MNN10         | YHL002W                 | HSE1          |
| YLR093C                                          | NYV1          | YEL013W                 | VAC8          |
| YNL215W                                          | IES2          | YGL148W                 | ARO2          |
| YJL124C                                          | LSM1          | YOL091W                 | SPO21         |
| YMR127C                                          | SAS2          | YHR114W                 | BZZ1          |
| YJR140C                                          | HIR3          | YDR289C                 | RTT103        |
| YIL159W                                          | BNR1          | YNL087W                 | TCB2          |
| YOR290C                                          | SNF2          | YER068W                 | MOT2          |
| YDR245W                                          | MNN10         | YOR043W                 | WHI2          |
| YJL036W                                          | SNX4          | YER162C                 | RAD4          |
| YLR058C                                          | SHM2          | YDR318W                 | MCM21         |
| YHR200W                                          | RPN10         | YGL003C                 | CDH1          |
| YKR020W                                          | VPS51         | YML071C                 | COG8          |
| YOR039W                                          | CKB2          | YPR119W                 | CLB2          |
| YDR439W                                          | LRS4          | YDR254W                 | CHL4          |
| YEL065W                                          | SIT1          | YJL140W                 | RPB4          |
| YOL111C                                          | MDY2          | YLR371W                 | ROM2          |
| YAL024C                                          | LTE1          | YML071C                 | COG8          |
| YDL020C                                          | RPN4          | YBR057C                 | MUM2          |
| YNL106C                                          | INP52         | YLR381W                 | CTF3          |
| YHL020C                                          | OPI1          | YAL002W                 | VPS8          |



| Predictions at threshold level 0.80 continued... |               |                         |               |
|--------------------------------------------------|---------------|-------------------------|---------------|
| Gene1 of predicted pair                          |               | Gene2 of predicted pair |               |
| Systematic Name                                  | Standard Name | Systematic Name         | Standard Name |
| YDR383C                                          | NKP1          | YDR378C                 | LSM6          |
| YNL248C                                          | RPA49         | YAR014C                 | BUD14         |
| YMR179W                                          | SPT21         | YDL013W                 | SLX5          |
| YCR066W                                          | RAD18         | YDL047W                 | SIT4          |
| YLR095C                                          | IOC2          | YML001W                 | YPT7          |
| YGL054C                                          | ERV14         | YKR039W                 | GAP1          |
| YLR170C                                          | APS1          | YPL259C                 | APM1          |
| YOR368W                                          | RAD17         | YMR038C                 | CCS1          |
| YBL021C                                          | HAP3          | YDR318W                 | MCM21         |
| YOR337W                                          | TEA1          | YBR030W                 | YBR030W       |
| YLR410W                                          | VIP1          | YOR141C                 | ARP8          |
| YDR009W                                          | GAL3          | YML051W                 | GAL80         |
| YOR106W                                          | VAM3          | YGL115W                 | SNF4          |
| YKR001C                                          | VPS1          | YKL041W                 | VPS24         |
| YPL024W                                          | RMI1          | YGL124C                 | MON1          |
| YDR289C                                          | RTT103        | YOL054W                 | PSH1          |
| YOR337W                                          | TEA1          | YBR173C                 | UMP1          |
| YDR378C                                          | LSM6          | YPL220W                 | RPL1A         |
| YGR261C                                          | APL6          | YDR207C                 | UME6          |
| YEL053C                                          | MAK10         | YMR230W                 | RPS10B        |
| YGL003C                                          | CDH1          | YOR368W                 | RAD17         |
| YOR066W                                          | MSA1          | YHR081W                 | LRP1          |
| YPR036W                                          | VMA13         | YJR032W                 | CPR7          |
| YMR202W                                          | ERG2          | YML095C                 | RAD10         |
| YPL246C                                          | RBD2          | YGR059W                 | SPR3          |
| YJR060W                                          | CBF1          | YER120W                 | SCS2          |
| YOR212W                                          | STE4          | YBL016W                 | FUS3          |
| YCR020C-A                                        | MAK31         | YOR127W                 | RGA1          |
| YBR171W                                          | SEC66         | YJR032W                 | CPR7          |

| Predictions at threshold level 0.80 continued... |               |                         |               |
|--------------------------------------------------|---------------|-------------------------|---------------|
| Gene1 of predicted pair                          |               | Gene2 of predicted pair |               |
| Systematic Name                                  | Standard Name | Systematic Name         | Standard Name |
| YFL023W                                          | BUD27         | YDL223C                 | HBT1          |
| YML071C                                          | COG8          | YMR311C                 | GLC8          |
| YDL149W                                          | ATG9          | YLR431C                 | ATG23         |
| YGL212W                                          | VAM7          | YDL083C                 | RPS16B        |
| YPL120W                                          | VPS30         | YNL127W                 | FAR11         |
| YFR008W                                          | FAR7          | YMR052W                 | FAR3          |
| YPL195W                                          | APL5          | YGL124C                 | MON1          |
| YKL048C                                          | ELM1          | YER044C                 | ERG28         |
| YGL253W                                          | HXK2          | YJL190C                 | RPS22A        |
| YMR199W                                          | CLN1          | YLR425W                 | TUS1          |
| YOR106W                                          | VAM3          | YPL120W                 | VPS30         |
| YOR083W                                          | WHI5          | YPR046W                 | MCM16         |
| YIL034C                                          | CAP2          | YJR032W                 | CPR7          |
| YDL020C                                          | RPN4          | YDL155W                 | CLB3          |
| YER110C                                          | KAP123        | YGL253W                 | HXK2          |
| YIL076W                                          | SEC28         | YFR036W                 | CDC26         |
| YBR057C                                          | MUM2          | YDR318W                 | MCM21         |
| YML071C                                          | COG8          | YOL081W                 | IRA2          |
| YBL102W                                          | SFT2          | YJL004C                 | SYS1          |
| YFR010W                                          | UBP6          | YJR084W                 | CSN12         |
| YOR033C                                          | EXO1          | YMR038C                 | CCS1          |
| YDR320C                                          | SWA2          | YEL022W                 | GEA2          |
| YGL147C                                          | RPL9A         | YNL307C                 | MCK1          |
| YLR370C                                          | ARC18         | YMR230W                 | RPS10B        |
| YDR378C                                          | LSM6          | YDR440W                 | DOT1          |
| YBL079W                                          | NUP170        | YGL031C                 | RPL24A        |
| YMR095C                                          | SNO1          | YKR035W-A               | DID2          |
| YNL248C                                          | RPA49         | YIR005W                 | IST3          |
| YKL010C                                          | UFD4          | YDL155W                 | CLB3          |

| Predictions at threshold level 0.80 continued... |               |                         |               |
|--------------------------------------------------|---------------|-------------------------|---------------|
| Gene1 of predicted pair                          |               | Gene2 of predicted pair |               |
| Systematic Name                                  | Standard Name | Systematic Name         | Standard Name |
| YPL161C                                          | BEM4          | YMR230W                 | RPS10B        |
| YOR275C                                          | RIM20         | YNL229C                 | URE2          |
| YOR180C                                          | DCI1          | YLR284C                 | ECI1          |
| YDR261C                                          | EXG2          | YLR371W                 | ROM2          |
| YCR063W                                          | BUD31         | YIR009W                 | MSL1          |
| YDR309C                                          | GIC2          | YDR310C                 | SUM1          |
| YJL172W                                          | CPS1          | YNL076W                 | MKS1          |
| YNL058C                                          | YNL058C       | YOL121C                 | RPS19A        |
| YGL087C                                          | MMS2          | YMR127C                 | SAS2          |
| YGL147C                                          | RPL9A         | YPL057C                 | SUR1          |
| YMR205C                                          | PFK2          | YJL183W                 | MNN11         |
| YLR386W                                          | VAC14         | YOR141C                 | ARP8          |
| YBL103C                                          | RTG3          | YPL057C                 | SUR1          |
| YNL069C                                          | RPL16B        | YGL054C                 | ERV14         |
| YEL065W                                          | SIT1          | YMR311C                 | GLC8          |
| YKL025C                                          | PAN3          | YBL051C                 | PIN4          |
| YDL155W                                          | CLB3          | YBL072C                 | RPS8A         |
| YHL031C                                          | GOS1          | YHR167W                 | THP2          |
| YOR358W                                          | HAP5          | YPL248C                 | GAL4          |
| YNL243W                                          | SLA2          | YDL192W                 | ARF1          |
| YLR315W                                          | NKP2          | YML112W                 | CTK3          |
| YHL020C                                          | OPI1          | YNL041C                 | COG6          |
| YNR052C                                          | POP2          | YBR200W                 | BEM1          |
| YMR116C                                          | ASC1          | YER001W                 | MNN1          |
| YKL032C                                          | IXR1          | YKR020W                 | VPS51         |
| YPL022W                                          | RAD1          | YBR274W                 | CHK1          |
| YJR140C                                          | HIR3          | YDR146C                 | SWI5          |
| YAR014C                                          | BUD14         | YGL252C                 | RTG2          |
| YLR410W                                          | VIP1          | YJR060W                 | CBF1          |

| Predictions at threshold level 0.80 continued... |               |                         |               |
|--------------------------------------------------|---------------|-------------------------|---------------|
| Gene1 of predicted pair                          |               | Gene2 of predicted pair |               |
| Systematic Name                                  | Standard Name | Systematic Name         | Standard Name |
| YDR318W                                          | MCM21         | YOR014W                 | RTS1          |
| YPR030W                                          | CSR2          | YGL003C                 | CDH1          |
| YPL049C                                          | DIG1          | YDR480W                 | DIG2          |
| YCL001W                                          | RER1          | YML038C                 | YMD8          |
| YBR041W                                          | FAT1          | YHR200W                 | RPN10         |
| YDR264C                                          | AKR1          | YPL256C                 | CLN2          |
| YAL024C                                          | LTE1          | YDR183W                 | PLP1          |
| YDL223C                                          | HBT1          | YKL041W                 | VPS24         |
| YDL116W                                          | NUP84         | YIL148W                 | RPL40A        |
| YCR088W                                          | ABP1          | YMR109W                 | MYO5          |
| YHR039C-A                                        | VMA10         | YMR214W                 | SCJ1          |
| YBL058W                                          | SHP1          | YFL023W                 | BUD27         |
| YGR184C                                          | UBR1          | YMR038C                 | CCS1          |
| YDR320C                                          | SWA2          | YDL006W                 | PTC1          |
| YBR217W                                          | ATG12         | YHR039C-A               | VMA10         |
| YBR217W                                          | ATG12         | YNL032W                 | SIW14         |
| YKL048C                                          | ELM1          | YLR371W                 | ROM2          |
| YDR004W                                          | RAD57         | YBR278W                 | DPB3          |
| YDR439W                                          | LRS4          | YML112W                 | CTK3          |
| YOR127W                                          | RGA1          | YNL051W                 | COG5          |
| YDR320C                                          | SWA2          | YOR327C                 | SNC2          |
| YPR017C                                          | DSS4          | YIL076W                 | SEC28         |
| YHR200W                                          | RPN10         | YBL087C                 | RPL23A        |
| YLL039C                                          | UBI4          | YMR089C                 | YTA12         |
| YBR279W                                          | PAF1          | YBR089C-A               | NHP6B         |
| YLR292C                                          | SEC72         | YCR086W                 | CSM1          |
| YJL210W                                          | PEX2          | YMR026C                 | PEX12         |
| YKR072C                                          | SIS2          | YBR274W                 | CHK1          |
| YPL050C                                          | MNN9          | YJL095W                 | BCK1          |

| Predictions at threshold level 0.80 continued... |               |                         |               |
|--------------------------------------------------|---------------|-------------------------|---------------|
| Gene1 of predicted pair                          |               | Gene2 of predicted pair |               |
| Systematic Name                                  | Standard Name | Systematic Name         | Standard Name |
| YDR176W                                          | NGG1          | YNL031C                 | HHT2          |
| YLR292C                                          | SEC72         | YGR054W                 | YGR054W       |
| YLR240W                                          | VPS34         | YOR036W                 | PEP12         |
| YGL163C                                          | RAD54         | YDR310C                 | SUM1          |
| YNL218W                                          | MGS1          | YOR080W                 | DIA2          |
| YFL033C                                          | RIM15         | YOL108C                 | INO4          |
| YMR142C                                          | RPL13B        | YLR370C                 | ARC18         |
| YHR156C                                          | LIN1          | YER139C                 | YER139C       |
| YOR140W                                          | SFL1          | YHR012W                 | VPS29         |
| YPR017C                                          | DSS4          | YOR069W                 | VPS5          |
| YGL078C                                          | DBP3          | YCR053W                 | THR4          |
| YER116C                                          | SLX8          | YBR200W                 | BEM1          |
| YER110C                                          | KAP123        | YLR447C                 | VMA6          |
| YER139C                                          | YER139C       | YOR124C                 | UBP2          |
| YHR086W                                          | NAM8          | YNL206C                 | RTT106        |
| YBR171W                                          | SEC66         | YGL124C                 | MON1          |
| YML109W                                          | ZDS2          | YDR227W                 | SIR4          |
| YLR095C                                          | IOC2          | YPL057C                 | SUR1          |
| YKR061W                                          | KTR2          | YDR254W                 | CHL4          |
| YIL053W                                          | RHR2          | YKR099W                 | BAS1          |
| YML102W                                          | CAC2          | YGL175C                 | SAE2          |
| YER120W                                          | SCS2          | YAR014C                 | BUD14         |
| YKR035W-A                                        | DID2          | YPR046W                 | MCM16         |
| YJL095W                                          | BCK1          | YBR280C                 | SAF1          |
| YHR178W                                          | STB5          | YJL095W                 | BCK1          |
| YMR004W                                          | MVP1          | YMR216C                 | SKY1          |
| YBR108W                                          | YBR108W       | YOR035C                 | SHE4          |
| YKL139W                                          | CTK1          | YFL023W                 | BUD27         |
| YCR053W                                          | THR4          | YHL011C                 | PRS3          |

| Predictions at threshold level 0.80 continued... |               |                         |               |
|--------------------------------------------------|---------------|-------------------------|---------------|
| Gene1 of predicted pair                          |               | Gene2 of predicted pair |               |
| Systematic Name                                  | Standard Name | Systematic Name         | Standard Name |
| YBR019C                                          | GAL10         | YMR230W                 | RPS10B        |
| YIR005W                                          | IST3          | YDR183W                 | PLP1          |
| YHR124W                                          | NDT80         | YJR094C                 | IME1          |
| YDR245W                                          | MNN10         | YOL081W                 | IRA2          |
| YDR192C                                          | NUP42         | YGL100W                 | SEH1          |
| YOR290C                                          | SNF2          | YJL183W                 | MNN11         |
| YNR072W                                          | HXT17         | YLR452C                 | SST2          |
| YFR031C-A                                        | RPL2A         | YLR119W                 | SRN2          |
| YMR172W                                          | HOT1          | YDR310C                 | SUM1          |
| YGL190C                                          | CDC55         | YKL057C                 | NUP120        |
| YHR108W                                          | GGA2          | YER122C                 | GLO3          |
| YLR360W                                          | VPS38         | YBL047C                 | EDE1          |
| YBL008W                                          | HIR1          | YLR429W                 | CRN1          |
| YDL116W                                          | NUP84         | YGR081C                 | SLX9          |
| YPR084W                                          | YPR084W       | YDR108W                 | GSG1          |
| YMR142C                                          | RPL13B        | YBR019C                 | GAL10         |
| YHR156C                                          | LIN1          | YBR036C                 | CSG2          |
| YLR381W                                          | CTF3          | YJL190C                 | RPS22A        |
| YHR098C                                          | SFB3          | YGL223C                 | COG1          |
| YHR161C                                          | YAP1801       | YIL033C                 | BCY1          |
| YPL022W                                          | RAD1          | YMR038C                 | CCS1          |
| YKR001C                                          | VPS1          | YJL183W                 | MNN11         |
| YNL215W                                          | IES2          | YJR063W                 | RPA12         |
| YKR101W                                          | SIR1          | YML102W                 | CAC2          |
| YEL065W                                          | SIT1          | YMR026C                 | PEX12         |
| YIL008W                                          | URM1          | YDL155W                 | CLB3          |
| YLL007C                                          | YLL007C       | YOR127W                 | RGA1          |
| YML013W                                          | UBX2          | YJR084W                 | CSN12         |
| YIL156W                                          | UBP7          | YPL256C                 | CLN2          |

| Predictions at threshold level 0.80 continued... |               |                         |               |
|--------------------------------------------------|---------------|-------------------------|---------------|
| Gene1 of predicted pair                          |               | Gene2 of predicted pair |               |
| Systematic Name                                  | Standard Name | Systematic Name         | Standard Name |
| YKL048C                                          | ELM1          | YBL025W                 | RRN10         |
| YJR058C                                          | APS2          | YDL192W                 | ARF1          |
| YBR057C                                          | MUM2          | YBL025W                 | RRN10         |
| YDR477W                                          | SNF1          | YOL121C                 | RPS19A        |
| YDR004W                                          | RAD57         | YDR310C                 | SUM1          |
| YCR065W                                          | HCM1          | YCR077C                 | PAT1          |
| YHR156C                                          | LIN1          | YDL184C                 | RPL41A        |
| YIL033C                                          | BCY1          | YGR188C                 | BUB1          |
| YDL006W                                          | PTC1          | YGR135W                 | PRE9          |
| YGR241C                                          | YAP1802       | YLR360W                 | VPS38         |
| YDR383C                                          | NKP1          | YKR061W                 | KTR2          |
| YPR036W                                          | VMA13         | YDR207C                 | UME6          |
| YML095C                                          | RAD10         | YHR111W                 | UBA4          |
| YPR084W                                          | YPR084W       | YNL199C                 | GCR2          |
| YDL184C                                          | RPL41A        | YPL037C                 | EGD1          |
| YML115C                                          | VAN1          | YBL067C                 | UBP13         |
| YOR106W                                          | VAM3          | YEL036C                 | ANP1          |
| YCR002C                                          | CDC10         | YCL024W                 | KCC4          |
| YOR127W                                          | RGA1          | YDL155W                 | CLB3          |
| YOL145C                                          | CTR9          | YDR469W                 | SDC1          |
| YDR358W                                          | GGA1          | YDL137W                 | ARF2          |
| YML115C                                          | VAN1          | YBR215W                 | HPC2          |
| YDL020C                                          | RPN4          | YKR072C                 | SIS2          |
| YLR119W                                          | SRN2          | YKL048C                 | ELM1          |
| YFR010W                                          | UBP6          | YBR107C                 | IML3          |
| YKL010C                                          | UFD4          | YJL095W                 | BCK1          |
| YJR140C                                          | HIR3          | YKL160W                 | ELF1          |
| YGL237C                                          | HAP2          | YHR115C                 | DMA1          |
| YJR024C                                          | MDE1          | YOL126C                 | MDH2          |

| Predictions at threshold level 0.80 continued... |               |                         |               |
|--------------------------------------------------|---------------|-------------------------|---------------|
| Gene1 of predicted pair                          |               | Gene2 of predicted pair |               |
| Systematic Name                                  | Standard Name | Systematic Name         | Standard Name |
| YLR386W                                          | VAC14         | YNL107W                 | YAF9          |
| YFL033C                                          | RIM15         | YER122C                 | GLO3          |
| YER144C                                          | UBP5          | YBL025W                 | RRN10         |
| YGR104C                                          | SRB5          | YDR146C                 | SWI5          |
| YHR013C                                          | ARD1          | YKR020W                 | VPS51         |
| YBL058W                                          | SHP1          | YNL087W                 | TCB2          |
| YDR358W                                          | GGA1          | YDR207C                 | UME6          |
| YOR132W                                          | VPS17         | YPR032W                 | SRO7          |
| YFR031C-A                                        | RPL2A         | YCR053W                 | THR4          |
| YMR116C                                          | ASC1          | YKL041W                 | VPS24         |
| YBR171W                                          | SEC66         | YBR114W                 | RAD16         |
| YMR224C                                          | MRE11         | YDR225W                 | HTA1          |
| YPL240C                                          | HSP82         | YCR040W                 | MATALPHA1     |
| YNL069C                                          | RPL16B        | YLR360W                 | VPS38         |
| YMR216C                                          | SKY1          | YJR060W                 | CBF1          |
| YCR077C                                          | PAT1          | YGL151W                 | NUT1          |
| YEL022W                                          | GEA2          | YLR039C                 | RIC1          |
| YLR288C                                          | MEC3          | YER116C                 | SLX8          |
| YLR386W                                          | VAC14         | YKL110C                 | KTI12         |
| YIL153W                                          | RRD1          | YGL190C                 | CDC55         |
| YLR309C                                          | IMH1          | YAL002W                 | VPS8          |
| YGL200C                                          | EMP24         | YGR105W                 | VMA21         |
| YDL155W                                          | CLB3          | YDR289C                 | RTT103        |
| YBR009C                                          | HHF1          | YLR357W                 | RSC2          |
| YNL248C                                          | RPA49         | YPL018W                 | CTF19         |
| YML103C                                          | NUP188        | YPL256C                 | CLN2          |
| YGL147C                                          | RPL9A         | YBR030W                 | YBR030W       |
| YGR241C                                          | YAP1802       | YDR323C                 | PEP7          |
| YMR284W                                          | YKU70         | YJL124C                 | LSM1          |



| Predictions at threshold level 0.80 continued... |               |                         |               |
|--------------------------------------------------|---------------|-------------------------|---------------|
| Gene1 of predicted pair                          |               | Gene2 of predicted pair |               |
| Systematic Name                                  | Standard Name | Systematic Name         | Standard Name |
| YIL034C                                          | CAP2          | YNL307C                 | MCK1          |
| YNL238W                                          | KEX2          | YMR214W                 | SCJ1          |
| YHR134W                                          | WSS1          | YOR358W                 | HAP5          |
| YEL065W                                          | SIT1          | YLR410W                 | VIP1          |
| YLR061W                                          | RPL22A        | YJR084W                 | CSN12         |
| YDL006W                                          | PTC1          | YKL161C                 | YKL161C       |
| YJL127C                                          | SPT10         | YMR106C                 | YKU80         |
| YNL206C                                          | RTT106        | YLR399C                 | BDF1          |
| YMR039C                                          | SUB1          | YMR055C                 | BUB2          |
| YJL117W                                          | PHO86         | YJL095W                 | BCK1          |
| YGL033W                                          | HOP2          | YJR056C                 | YJR056C       |
| YEL053C                                          | MAK10         | YPR030W                 | CSR2          |
| YPR120C                                          | CLB5          | YNL079C                 | TPM1          |
| YDL116W                                          | NUP84         | YDR363W-A               | SEM1          |
| YKR061W                                          | KTR2          | YPL253C                 | VIK1          |
| YFR030W                                          | MET10         | YOR141C                 | ARP8          |
| YDR174W                                          | HMO1          | YPL253C                 | VIK1          |
| YOR083W                                          | WHI5          | YPR131C                 | NAT3          |
| YER049W                                          | TPA1          | YLR425W                 | TUS1          |
| YDR244W                                          | PEX5          | YLR284C                 | ECI1          |
| YDR245W                                          | MNN10         | YGR270W                 | YTA7          |
| YDR289C                                          | RTT103        | YGR188C                 | BUB1          |
| YER116C                                          | SLX8          | YOL121C                 | RPS19A        |
| YLL007C                                          | YLL007C       | YDR310C                 | SUM1          |
| YDR129C                                          | SAC6          | YER001W                 | MNN1          |
| YAL024C                                          | LTE1          | YLR006C                 | SSK1          |
| YHR111W                                          | UBA4          | YDL006W                 | PTC1          |
| YPR046W                                          | MCM16         | YEL060C                 | PRB1          |
| YBL058W                                          | SHP1          | YNL325C                 | FIG4          |

| Predictions at threshold level 0.80 continued... |               |                         |               |
|--------------------------------------------------|---------------|-------------------------|---------------|
| Gene1 of predicted pair                          |               | Gene2 of predicted pair |               |
| Systematic Name                                  | Standard Name | Systematic Name         | Standard Name |
| YMR116C                                          | ASC1          | YJR035W                 | RAD26         |
| YKL126W                                          | YPK1          | YEL053C                 | MAK10         |
| YMR127C                                          | SAS2          | YGR270W                 | YTA7          |
| YLR216C                                          | CPR6          | YDR260C                 | SWM1          |
| YMR142C                                          | RPL13B        | YMR214W                 | SCJ1          |
| YBR030W                                          | YBR030W       | YER122C                 | GLO3          |
| YMR054W                                          | STV1          | YAL002W                 | VPS8          |
| YOR080W                                          | DIA2          | YNL199C                 | GCR2          |
| YBR108W                                          | YBR108W       | YDR318W                 | MCM21         |
| YLR337C                                          | VRP1          | YOR358W                 | HAP5          |
| YKR061W                                          | KTR2          | YPR120C                 | CLB5          |
| YMR142C                                          | RPL13B        | YNL058C                 | YNL058C       |
| YPL161C                                          | BEM4          | YDR309C                 | GIC2          |
| YNR058W                                          | BIO3          | YLR094C                 | GIS3          |
| YHL031C                                          | GOS1          | YLR182W                 | SWI6          |
| YMR313C                                          | TGL3          | YKL094W                 | YJU3          |
| YHR205W                                          | SCH9          | YJL095W                 | BCK1          |
| YBL021C                                          | HAP3          | YJR135C                 | MCM22         |
| YMR199W                                          | CLN1          | YGL031C                 | RPL24A        |
| YIR003W                                          | YIR003W       | YPR171W                 | BSP1          |
| YBR173C                                          | UMP1          | YJL183W                 | MNN11         |
| YOR290C                                          | SNF2          | YFR036W                 | CDC26         |
| YDR153C                                          | ENT5          | YNR032W                 | PPG1          |
| YPL195W                                          | APL5          | YMR311C                 | GLC8          |
| YDR200C                                          | VPS64         | YMR052W                 | FAR3          |
| YBL058W                                          | SHP1          | YLR320W                 | MMS22         |
| YHR056C                                          | RSC30         | YMR038C                 | CCS1          |
| YMR095C                                          | SNO1          | YMR311C                 | GLC8          |
| YPL256C                                          | CLN2          | YMR052W                 | FAR3          |

| Predictions at threshold level 0.80 continued... |               |                         |               |
|--------------------------------------------------|---------------|-------------------------|---------------|
| Gene1 of predicted pair                          |               | Gene2 of predicted pair |               |
| Systematic Name                                  | Standard Name | Systematic Name         | Standard Name |
| YCR077C                                          | PAT1          | YER122C                 | GLO3          |
| YOL111C                                          | MDY2          | YDR207C                 | UME6          |
| YGL115W                                          | SNF4          | YLR371W                 | ROM2          |
| YEL053C                                          | MAK10         | YDR289C                 | RTT103        |
| YMR016C                                          | SOK2          | YBL103C                 | RTG3          |
| YJR040W                                          | GEF1          | YAR014C                 | BUD14         |
| YPR131C                                          | NAT3          | YKR024C                 | DBP7          |
| YOR109W                                          | INP53         | YNL041C                 | COG6          |
| YNL325C                                          | FIG4          | YDR207C                 | UME6          |
| YGL212W                                          | VAM7          | YLR180W                 | SAM1          |
| YER019C-A                                        | SBH2          | YHR200W                 | RPN10         |
| YBR108W                                          | YBR108W       | YLR093C                 | NYV1          |
| YKR014C                                          | YPT52         | YBR082C                 | UBC4          |
| YCR065W                                          | HCM1          | YLR452C                 | SST2          |
| YKL048C                                          | ELM1          | YHR114W                 | BZZ1          |
| YEL027W                                          | CUP5          | YER072W                 | VTC1          |
| YFR031C-A                                        | RPL2A         | YBL025W                 | RRN10         |
| YOR275C                                          | RIM20         | YHR115C                 | DMA1          |
| YNL106C                                          | INP52         | YLR135W                 | SLX4          |
| YOR195W                                          | SLK19         | YOR141C                 | ARP8          |
| YNL273W                                          | TOF1          | YHR056C                 | RSC30         |
| YBL025W                                          | RRN10         | YCR053W                 | THR4          |
| YDL155W                                          | CLB3          | YJL095W                 | BCK1          |
| YGR019W                                          | UGA1          | YDR289C                 | RTT103        |
| YLR064W                                          | YLR064W       | YOR284W                 | HUA2          |
| YDR183W                                          | PLP1          | YJL190C                 | RPS22A        |
| YER115C                                          | SPR6          | YGR059W                 | SPR3          |
| YKL126W                                          | YPK1          | YHR081W                 | LRP1          |
| YBR200W                                          | BEM1          | YBL085W                 | BOI1          |

| Predictions at threshold level 0.80 continued... |               |                         |               |
|--------------------------------------------------|---------------|-------------------------|---------------|
| Gene1 of predicted pair                          |               | Gene2 of predicted pair |               |
| Systematic Name                                  | Standard Name | Systematic Name         | Standard Name |
| YAL024C                                          | LTE1          | YGL124C                 | MON1          |
| YGL060W                                          | YBP2          | YBR194W                 | SOY1          |
| YFR031C-A                                        | RPL2A         | YMR095C                 | SNO1          |
| YMR153W                                          | NUP53         | YGR059W                 | SPR3          |
| YGL095C                                          | VPS45         | YOL018C                 | TLG2          |
| YNR052C                                          | POP2          | YDL013W                 | SLX5          |
| YEL043W                                          | YEL043W       | YKR030W                 | GMH1          |
| YGL151W                                          | NUT1          | YHR114W                 | BZZ1          |
| YBR082C                                          | UBC4          | YGL031C                 | RPL24A        |
| YKR099W                                          | BAS1          | YJL095W                 | BCK1          |
| YOR270C                                          | VPH1          | YMR214W                 | SCJ1          |
| YBR108W                                          | YBR108W       | YPR030W                 | CSR2          |
| YBL103C                                          | RTG3          | YOR035C                 | SHE4          |
| YKR061W                                          | KTR2          | YNL307C                 | MCK1          |
| YER115C                                          | SPR6          | YML057W                 | CMP2          |
| YBR131W                                          | CCZ1          | YJR033C                 | RAV1          |
| YPR120C                                          | CLB5          | YDL006W                 | PTC1          |
| YDR245W                                          | MNN10         | YKL048C                 | ELM1          |
| YDR183W                                          | PLP1          | YOR141C                 | ARP8          |
| YER001W                                          | MNN1          | YBL072C                 | RPS8A         |
| YNR052C                                          | POP2          | YGL031C                 | RPL24A        |
| YER120W                                          | SCS2          | YJL004C                 | SYS1          |
| YBR228W                                          | SLX1          | YCR086W                 | CSM1          |
| YMR142C                                          | RPL13B        | YGL124C                 | MON1          |
| YJR140C                                          | HIR3          | YOR038C                 | HIR2          |
| YDL247W                                          | MPH2          | YPL240C                 | HSP82         |
| YLR452C                                          | SST2          | YGL124C                 | MON1          |
| YLR399C                                          | BDF1          | YGL163C                 | RAD54         |
| YEL065W                                          | SIT1          | YLR306W                 | UBC12         |

| Predictions at threshold level 0.80 continued... |               |                         |               |
|--------------------------------------------------|---------------|-------------------------|---------------|
| Gene1 of predicted pair                          |               | Gene2 of predicted pair |               |
| Systematic Name                                  | Standard Name | Systematic Name         | Standard Name |
| YHR200W                                          | RPN10         | YLR306W                 | UBC12         |
| YOR109W                                          | INP53         | YGR105W                 | VMA21         |
| YBR200W                                          | BEM1          | YJL190C                 | RPS22A        |
| YDR309C                                          | GIC2          | YHR115C                 | DMA1          |
| YLR337C                                          | VRP1          | YNL288W                 | CAF40         |
| YLR441C                                          | RPS1A         | YBL025W                 | RRN10         |
| YMR224C                                          | MRE11         | YHR039C-A               | VMA10         |
| YBL103C                                          | RTG3          | YKR099W                 | BAS1          |
| YLR093C                                          | NYV1          | YBL025W                 | RRN10         |
| YER116C                                          | SLX8          | YJR035W                 | RAD26         |
| YLR288C                                          | MEC3          | YBR173C                 | UMP1          |
| YNL325C                                          | FIG4          | YKR099W                 | BAS1          |
| YPL195W                                          | APL5          | YOR035C                 | SHE4          |
| YJL124C                                          | LSM1          | YLR315W                 | NKP2          |
| YOL041C                                          | NOP12         | YNL175C                 | NOP13         |
| YER139C                                          | YER139C       | YLR370C                 | ARC18         |
| YGL087C                                          | MMS2          | YER116C                 | SLX8          |
| YMR026C                                          | PEX12         | YMR153W                 | NUP53         |
| YOR127W                                          | RGA1          | YER122C                 | GLO3          |
| YFR031C-A                                        | RPL2A         | YCR020C-A               | MAK31         |
| YPR036W                                          | VMA13         | YNL041C                 | COG6          |
| YPL240C                                          | HSP82         | YHR187W                 | IKI1          |
| YDR363W-A                                        | SEM1          | YLR315W                 | NKP2          |
| YLR399C                                          | BDF1          | YKL048C                 | ELM1          |
| YBR228W                                          | SLX1          | YGR071C                 | YGR071C       |
| YMR224C                                          | MRE11         | YOL030W                 | GAS5          |
| YNL199C                                          | GCR2          | YER096W                 | SHC1          |
| YKL126W                                          | YPK1          | YBR280C                 | SAF1          |
| YEL053C                                          | MAK10         | YNL041C                 | COG6          |

| Predictions at threshold level 0.80 continued... |               |                         |               |
|--------------------------------------------------|---------------|-------------------------|---------------|
| Gene1 of predicted pair                          |               | Gene2 of predicted pair |               |
| Systematic Name                                  | Standard Name | Systematic Name         | Standard Name |
| YGL003C                                          | CDH1          | YLR032W                 | RAD5          |
| YLR192C                                          | HCR1          | YNL238W                 | KEX2          |
| YGR072W                                          | UPF3          | YCL001W                 | RER1          |
| YGL066W                                          | SGF73         | YDR318W                 | MCM21         |
| YKR099W                                          | BAS1          | YLR320W                 | MMS22         |
| YGL066W                                          | SGF73         | YBR111W-A               | SUS1          |
| YCR066W                                          | RAD18         | YPL161C                 | BEM4          |
| YKL126W                                          | YPK1          | YJL164C                 | TPK1          |
| YJR059W                                          | PTK2          | YCR024C-A               | PMP1          |
| YJL136C                                          | RPS21B        | YDR363W-A               | SEM1          |
| YIL076W                                          | SEC28         | YHR060W                 | VMA22         |
| YBR215W                                          | HPC2          | YLR315W                 | NKP2          |
| YKL025C                                          | PAN3          | YDR155C                 | CPR1          |
| YLR090W                                          | XDJ1          | YML115C                 | VAN1          |
| YGL252C                                          | RTG2          | YOR208W                 | PTP2          |
| YJL176C                                          | SWI3          | YHR013C                 | ARD1          |
| YML001W                                          | YPT7          | YKR030W                 | GMH1          |
| YLR135W                                          | SLX4          | YER116C                 | SLX8          |
| YIL156W                                          | UBP7          | YPL246C                 | RBD2          |
| YHL031C                                          | GOS1          | YLR447C                 | VMA6          |
| YBR057C                                          | MUM2          | YJR135C                 | MCM22         |
| YML115C                                          | VAN1          | YFL023W                 | BUD27         |
| YBR173C                                          | UMP1          | YLR441C                 | RPS1A         |
| YPR017C                                          | DSS4          | YDR153C                 | ENT5          |
| YPR036W                                          | VMA13         | YPR030W                 | CSR2          |
| YBL051C                                          | PIN4          | YKR048C                 | NAP1          |
| YDL052C                                          | SLC1          | YMR246W                 | FAA4          |
| YFR010W                                          | UBP6          | YCR053W                 | THR4          |
| YIL159W                                          | BNR1          | YNL325C                 | FIG4          |

| Predictions at threshold level 0.80 continued... |               |                         |               |
|--------------------------------------------------|---------------|-------------------------|---------------|
| Gene1 of predicted pair                          |               | Gene2 of predicted pair |               |
| Systematic Name                                  | Standard Name | Systematic Name         | Standard Name |
| YBL047C                                          | EDE1          | YBL101C                 | ECM21         |
| YER144C                                          | UBP5          | YML071C                 | COG8          |
| YBL058W                                          | SHP1          | YBR200W                 | BEM1          |
| YPR120C                                          | CLB5          | YDL226C                 | GCS1          |
| YDR440W                                          | DOT1          | YBL025W                 | RRN10         |
| YLR441C                                          | RPS1A         | YDR310C                 | SUM1          |
| YOR312C                                          | RPL20B        | YMR089C                 | YTA12         |
| YJL176C                                          | SWI3          | YKL006W                 | RPL14A        |
| YPR120C                                          | CLB5          | YBR158W                 | AMN1          |
| YGR072W                                          | UPF3          | YCL037C                 | SRO9          |
| YKL213C                                          | DOA1          | YEL013W                 | VAC8          |
| YNL201C                                          | PSY2          | YJR060W                 | CBF1          |
| YCR086W                                          | CSM1          | YOL081W                 | IRA2          |
| YJR056C                                          | YJR056C       | YDR261C                 | EXG2          |
| YNL041C                                          | COG6          | YMR230W                 | RPS10B        |
| YEL056W                                          | HAT2          | YGL148W                 | ARO2          |
| YPL057C                                          | SUR1          | YDL155W                 | CLB3          |
| YER122C                                          | GLO3          | YER040W                 | GLN3          |
| YIR009W                                          | MSL1          | YDR289C                 | RTT103        |
| YJL095W                                          | BCK1          | YNL107W                 | YAF9          |
| YDR443C                                          | SSN2          | YCR081W                 | SRB8          |
| YMR224C                                          | MRE11         | YBR217W                 | ATG12         |
| YFR032C-A                                        | RPL29         | YBL101C                 | ECM21         |
| YPL022W                                          | RAD1          | YDR254W                 | CHL4          |
| YNL218W                                          | MGS1          | YGL031C                 | RPL24A        |
| YIL053W                                          | RHR2          | YGL212W                 | VAM7          |
| YEL065W                                          | SIT1          | YCR053W                 | THR4          |
| YER116C                                          | SLX8          | YJL187C                 | SWE1          |
| YLR079W                                          | SIC1          | YNL199C                 | GCR2          |

| Predictions at threshold level 0.80 continued... |               |                         |               |
|--------------------------------------------------|---------------|-------------------------|---------------|
| Gene1 of predicted pair                          |               | Gene2 of predicted pair |               |
| Systematic Name                                  | Standard Name | Systematic Name         | Standard Name |
| YPR084W                                          | YPR084W       | YER139C                 | YER139C       |
| YCR065W                                          | HCM1          | YFR010W                 | UBP6          |
| YKR014C                                          | YPT52         | YLR093C                 | NYV1          |
| YIL053W                                          | RHR2          | YDR261C                 | EXG2          |
| YER054C                                          | GIP2          | YML016C                 | PPZ1          |
| YJR032W                                          | CPR7          | YER162C                 | RAD4          |
| YPL259C                                          | APM1          | YDL192W                 | ARF1          |
| YHR081W                                          | LRP1          | YJR035W                 | RAD26         |
| YMR109W                                          | MYO5          | YBR260C                 | RGD1          |
| YJL095W                                          | BCK1          | YGL031C                 | RPL24A        |
| YJR060W                                          | CBF1          | YFR036W                 | CDC26         |
| YPL115C                                          | BEM3          | YPL161C                 | BEM4          |
| YPR018W                                          | RLF2          | YNL079C                 | TPM1          |
| YLR216C                                          | CPR6          | YKR048C                 | NAP1          |
| YBR065C                                          | ECM2          | YMR216C                 | SKY1          |
| YDR129C                                          | SAC6          | YDR378C                 | LSM6          |
| YHR052W                                          | CIC1          | YHR010W                 | RPL27A        |
| YDR080W                                          | VPS41         | YPL105C                 | YPL105C       |
| YNL076W                                          | MKS1          | YBR036C                 | CSG2          |
| YNL199C                                          | GCR2          | YOR308C                 | SNU66         |
| YJL172W                                          | CPS1          | YBR171W                 | SEC66         |
| YGL133W                                          | ITC1          | YPL256C                 | CLN2          |
| YEL009C                                          | GCN4          | YFR034C                 | PHO4          |
| YDL083C                                          | RPS16B        | YMR214W                 | SCJ1          |
| YOR127W                                          | RGA1          | YJL190C                 | RPS22A        |
| YAL024C                                          | LTE1          | YGL033W                 | HOP2          |
| YPL161C                                          | BEM4          | YOR035C                 | SHE4          |
| YKL025C                                          | PAN3          | YDR254W                 | CHL4          |
| YLR360W                                          | VPS38         | YML071C                 | COG8          |



| Predictions at threshold level 0.80 continued... |               |                         |               |
|--------------------------------------------------|---------------|-------------------------|---------------|
| Gene1 of predicted pair                          |               | Gene2 of predicted pair |               |
| Systematic Name                                  | Standard Name | Systematic Name         | Standard Name |
| YHR156C                                          | LIN1          | YPL037C                 | EGD1          |
| YOR038C                                          | HIR2          | YDR289C                 | RTT103        |
| YNL032W                                          | SIW14         | YKL048C                 | ELM1          |
| YNL209W                                          | SSB2          | YDR477W                 | SNF1          |
| YPL213W                                          | LEA1          | YHL002W                 | HSE1          |
| YPR018W                                          | RLF2          | YML028W                 | TSA1          |
| YNL307C                                          | MCK1          | YLR370C                 | ARC18         |
| YLR360W                                          | VPS38         | YBR260C                 | RGD1          |
| YOL145C                                          | CTR9          | YJR060W                 | CBF1          |
| YKL126W                                          | YPK1          | YBL025W                 | RRN10         |
| YJL095W                                          | BCK1          | YHL011C                 | PRS3          |
| YDR293C                                          | SSD1          | YNL107W                 | YAF9          |
| YGR108W                                          | CLB1          | YPR051W                 | MAK3          |
| YML115C                                          | VAN1          | YOR008C                 | SLG1          |
| YFR010W                                          | UBP6          | YBR173C                 | UMP1          |
| YNL032W                                          | SIW14         | YLR320W                 | MMS22         |
| YDR383C                                          | NKP1          | YDR335W                 | MSN5          |
| YBR194W                                          | SOY1          | YDR171W                 | HSP42         |
| YGR059W                                          | SPR3          | YML057W                 | CMP2          |
| YDL020C                                          | RPN4          | YNL166C                 | BNI5          |
| YPL161C                                          | BEM4          | YLR093C                 | NYV1          |
| YJR059W                                          | PTK2          | YKR024C                 | DBP7          |
| YJR060W                                          | CBF1          | YER162C                 | RAD4          |
| YOR332W                                          | VMA4          | YPL234C                 | TFP3          |
| YLR452C                                          | SST2          | YPL256C                 | CLN2          |
| YLR240W                                          | VPS34         | YDL161W                 | ENT1          |
| YOR106W                                          | VAM3          | YOR014W                 | RTS1          |
| YBR217W                                          | ATG12         | YBR030W                 | YBR030W       |
| YGL087C                                          | MMS2          | YHR013C                 | ARD1          |

| Predictions at threshold level 0.80 continued... |               |                         |               |
|--------------------------------------------------|---------------|-------------------------|---------------|
| Gene1 of predicted pair                          |               | Gene2 of predicted pair |               |
| Systematic Name                                  | Standard Name | Systematic Name         | Standard Name |
| YJR040W                                          | GEF1          | YML001W                 | YPT7          |
| YHR060W                                          | VMA22         | YKL080W                 | VMA5          |
| YDR129C                                          | SAC6          | YBL072C                 | RPS8A         |
| YNL031C                                          | HHT2          | YPR072W                 | NOT5          |
| YGL087C                                          | MMS2          | YDR318W                 | MCM21         |
| YLR192C                                          | HCR1          | YMR016C                 | SOK2          |
| YML013W                                          | UBX2          | YGL003C                 | CDH1          |
| YBR107C                                          | IML3          | YLR254C                 | NDL1          |
| YDR176W                                          | NGG1          | YGL221C                 | NIF3          |
| YLR360W                                          | VPS38         | YHR114W                 | BZZ1          |
| YEL065W                                          | SIT1          | YOR290C                 | SNF2          |
| YGL133W                                          | ITC1          | YGL163C                 | RAD54         |
| YGL115W                                          | SNF4          | YLR429W                 | CRN1          |
| YKR035W-A                                        | DID2          | YMR311C                 | GLC8          |
| YER116C                                          | SLX8          | YJL095W                 | BCK1          |
| YLR094C                                          | GIS3          | YFR036W                 | CDC26         |
| YLR381W                                          | CTF3          | YOL054W                 | PSH1          |
| YBL088C                                          | TEL1          | YNR052C                 | POP2          |
| YDR293C                                          | SSD1          | YDL192W                 | ARF1          |
| YDR318W                                          | MCM21         | YEL056W                 | HAT2          |
| YDL116W                                          | NUP84         | YIL156W                 | UBP7          |
| YBL021C                                          | HAP3          | YJL190C                 | RPS22A        |
| YER044C                                          | ERG28         | YOL081W                 | IRA2          |
| YKL139W                                          | CTK1          | YKR048C                 | NAP1          |
| YBR173C                                          | UMP1          | YFL023W                 | BUD27         |
| YDR443C                                          | SSN2          | YPL256C                 | CLN2          |
| YLR090W                                          | XDJ1          | YMR152W                 | YIM1          |
| YLR386W                                          | VAC14         | YLR370C                 | ARC18         |
| YDL155W                                          | CLB3          | YBR114W                 | RAD16         |

| Predictions at threshold level 0.80 continued... |               |                         |               |
|--------------------------------------------------|---------------|-------------------------|---------------|
| Gene1 of predicted pair                          |               | Gene2 of predicted pair |               |
| Systematic Name                                  | Standard Name | Systematic Name         | Standard Name |
| YJL176C                                          | SWI3          | YDR358W                 | GGA1          |
| YCR024C-A                                        | PMP1          | YNL199C                 | GCR2          |
| YBR173C                                          | UMP1          | YDR358W                 | GGA1          |
| YDL020C                                          | RPN4          | YDR254W                 | CHL4          |
| YIL076W                                          | SEC28         | YMR152W                 | YIM1          |
| YOR358W                                          | HAP5          | YKR024C                 | DBP7          |
| YHR081W                                          | LRP1          | YPR046W                 | MCM16         |
| YPL161C                                          | BEM4          | YEL051W                 | VMA8          |
| YOR023C                                          | AHC1          | YOR358W                 | HAP5          |
| YPL024W                                          | RMI1          | YDR076W                 | RAD55         |
| YPL024W                                          | RMI1          | YDR071C                 | PAA1          |
| YGL078C                                          | DBP3          | YLR386W                 | VAC14         |
| YBR030W                                          | YBR030W       | YLR180W                 | SAM1          |
| YML058W                                          | SML1          | YBR274W                 | CHK1          |
| YDR320C                                          | SWA2          | YPL037C                 | EGD1          |
| YKR061W                                          | KTR2          | YLR182W                 | SWI6          |
| YDR448W                                          | ADA2          | YLR399C                 | BDF1          |
| YJL154C                                          | VPS35         | YDR293C                 | SSD1          |
| YLR094C                                          | GIS3          | YBR280C                 | SAF1          |
| YDL020C                                          | RPN4          | YKR001C                 | VPS1          |
| YHR052W                                          | CIC1          | YKR024C                 | DBP7          |
| YLR386W                                          | VAC14         | YGL025C                 | PGD1          |
| YNL206C                                          | RTT106        | YHR200W                 | RPN10         |
| YDL002C                                          | NHP10         | YOR043W                 | WHI2          |
| YLR315W                                          | NKP2          | YFR036W                 | CDC26         |
| YPL024W                                          | RMI1          | YLR032W                 | RAD5          |
| YGR072W                                          | UPF3          | YNL297C                 | MON2          |
| YJL154C                                          | VPS35         | YHR114W                 | BZZ1          |
| YKL139W                                          | CTK1          | YHR039C-A               | VMA10         |

| Predictions at threshold level 0.80 continued... |               |                         |               |
|--------------------------------------------------|---------------|-------------------------|---------------|
| Gene1 of predicted pair                          |               | Gene2 of predicted pair |               |
| Systematic Name                                  | Standard Name | Systematic Name         | Standard Name |
| YHR171W                                          | ATG7          | YLR093C                 | NYV1          |
| YOR058C                                          | ASE1          | YGL190C                 | CDC55         |
| YIL008W                                          | URM1          | YNL107W                 | YAF9          |
| YPL129W                                          | TAF14         | YJL124C                 | LSM1          |
| YMR004W                                          | MVP1          | YDR310C                 | SUM1          |
| YNL291C                                          | MID1          | YDL155W                 | CLB3          |
| YMR142C                                          | RPL13B        | YBL025W                 | RRN10         |
| YLR090W                                          | XDJ1          | YJR084W                 | CSN12         |
| YHR200W                                          | RPN10         | YLR182W                 | SWI6          |
| YDR293C                                          | SSD1          | YMR109W                 | MYO5          |
| YPL253C                                          | VIK1          | YLR447C                 | VMA6          |
| YLL007C                                          | YLL007C       | YPL115C                 | BEM3          |
| YLR018C                                          | POM34         | YFL047W                 | RGD2          |
| YBR188C                                          | NTC20         | YKL074C                 | MUD2          |
| YLR381W                                          | CTF3          | YLR410W                 | VIP1          |
| YPL195W                                          | APL5          | YOL081W                 | IRA2          |
| YOL018C                                          | TLG2          | YER122C                 | GLO3          |
| YJR056C                                          | YJR056C       | YDL223C                 | HBT1          |
| YBR195C                                          | MSI1          | YPR120C                 | CLB5          |
| YGL237C                                          | HAP2          | YBR107C                 | IML3          |
| YER114C                                          | BOI2          | YER124C                 | DSE1          |
| YBR194W                                          | SOY1          | YJR005W                 | APL1          |
| YJR058C                                          | APS2          | YDL006W                 | PTC1          |
| YOR337W                                          | TEA1          | YGL124C                 | MON1          |
| YER161C                                          | SPT2          | YOR124C                 | UBP2          |
| YBL079W                                          | NUP170        | YJR035W                 | RAD26         |
| YGL197W                                          | MDS3          | YDL155W                 | CLB3          |
| YHR039C-A                                        | VMA10         | YLR180W                 | SAM1          |
| YNL238W                                          | KEX2          | YEL060C                 | PRB1          |

| Predictions at threshold level 0.80 continued... |               |                         |               |
|--------------------------------------------------|---------------|-------------------------|---------------|
| Gene1 of predicted pair                          |               | Gene2 of predicted pair |               |
| Systematic Name                                  | Standard Name | Systematic Name         | Standard Name |
| YGL033W                                          | HOP2          | YNL238W                 | KEX2          |
| YGL087C                                          | MMS2          | YLR292C                 | SEC72         |
| YDR451C                                          | YHP1          | YCR040W                 | MATALPHA1     |
| YHR060W                                          | VMA22         | YNL107W                 | YAF9          |
| YNL041C                                          | COG6          | YOL108C                 | INO4          |
| YMR198W                                          | CIK1          | YKL114C                 | APN1          |
| YMR167W                                          | MLH1          | YOL081W                 | IRA2          |
| YPR018W                                          | RLF2          | YNL117W                 | MLS1          |
| YDR378C                                          | LSM6          | YDR318W                 | MCM21         |
| YOR324C                                          | FRT1          | YLR433C                 | CNA1          |
| YML058W                                          | SML1          | YML006C                 | GIS4          |
| YNL032W                                          | SIW14         | YDR358W                 | GGA1          |
| YDL116W                                          | NUP84         | YOL030W                 | GAS5          |
| YDR320C                                          | SWA2          | YDL077C                 | VAM6          |
| YOR270C                                          | VPH1          | YDR202C                 | RAV2          |
| YJL176C                                          | SWI3          | YJL183W                 | MNN11         |
| YEL065W                                          | SIT1          | YMR230W                 | RPS10B        |
| YEL053C                                          | MAK10         | YNL238W                 | KEX2          |
| YGR020C                                          | VMA7          | YOR109W                 | INP53         |
| YPL234C                                          | TFP3          | YGR105W                 | VMA21         |
| YLR320W                                          | MMS22         | YOR368W                 | RAD17         |
| YNL025C                                          | SSN8          | YCR077C                 | PAT1          |
| YJR040W                                          | GEF1          | YPL161C                 | BEM4          |
| YAL024C                                          | LTE1          | YDR207C                 | UME6          |
| YNL041C                                          | COG6          | YPR046W                 | MCM16         |
| YLR386W                                          | VAC14         | YMR199W                 | CLN1          |
| YDR293C                                          | SSD1          | YKR028W                 | SAP190        |
| YNL206C                                          | RTT106        | YDR379W                 | RGA2          |
| YNL087W                                          | TCB2          | YHR200W                 | RPN10         |

| Predictions at threshold level 0.80 continued... |               |                         |               |
|--------------------------------------------------|---------------|-------------------------|---------------|
| Gene1 of predicted pair                          |               | Gene2 of predicted pair |               |
| Systematic Name                                  | Standard Name | Systematic Name         | Standard Name |
| YGL135W                                          | RPL1B         | YLR131C                 | ACE2          |
| YDR335W                                          | MSN5          | YCR086W                 | CSM1          |
| YPL024W                                          | RMI1          | YEL060C                 | PRB1          |
| YNL068C                                          | FKH2          | YGL031C                 | RPL24A        |
| YPL161C                                          | BEM4          | YJL187C                 | SWE1          |
| YPL042C                                          | SSN3          | YDR245W                 | MNN10         |
| YDL101C                                          | DUN1          | YOL043C                 | NTG2          |
| YLR079W                                          | SIC1          | YLR315W                 | NKP2          |
| YGL174W                                          | BUD13         | YER139C                 | YER139C       |
| YPR051W                                          | MAK3          | YGL124C                 | MON1          |
| YPR084W                                          | YPR084W       | YKL139W                 | CTK1          |
| YDR469W                                          | SDC1          | YGL003C                 | CDH1          |
| YDR156W                                          | RPA14         | YDR289C                 | RTT103        |
| YJL124C                                          | LSM1          | YDR440W                 | DOT1          |
| YCL027W                                          | FUS1          | YER032W                 | FIR1          |
| YML095C                                          | RAD10         | YMR055C                 | BUB2          |
| YGL087C                                          | MMS2          | YOR132W                 | VPS17         |
| YPR131C                                          | NAT3          | YJR060W                 | CBF1          |
| YBR173C                                          | UMP1          | YBR280C                 | SAF1          |
| YDL161W                                          | ENT1          | YOR035C                 | SHE4          |
| YPL115C                                          | BEM3          | YLR337C                 | VRP1          |
| YML051W                                          | GAL80         | YPL248C                 | GAL4          |
| YPL195W                                          | APL5          | YEL051W                 | VMA8          |
| YDR379W                                          | RGA2          | YGR135W                 | PRE9          |
| YPL050C                                          | MNN9          | YKL041W                 | VPS24         |
| YCR020C-A                                        | MAK31         | YLR360W                 | VPS38         |
| YDR156W                                          | RPA14         | YLR410W                 | VIP1          |
| YGR108W                                          | CLB1          | YOR023C                 | AHC1          |
| YNL229C                                          | URE2          | YKL101W                 | HSL1          |

| Predictions at threshold level 0.80 continued... |               |                         |               |
|--------------------------------------------------|---------------|-------------------------|---------------|
| Gene1 of predicted pair                          |               | Gene2 of predicted pair |               |
| Systematic Name                                  | Standard Name | Systematic Name         | Standard Name |
| YPR017C                                          | DSS4          | YHL020C                 | OPI1          |
| YER068W                                          | MOT2          | YBR010W                 | HHT1          |
| YLR315W                                          | NKP2          | YEL013W                 | VAC8          |
| YJL029C                                          | VPS53         | YOR036W                 | PEP12         |
| YMR055C                                          | BUB2          | YDR310C                 | SUM1          |
| YGL115W                                          | SNF4          | YLR309C                 | IMH1          |
| YER139C                                          | YER139C       | YNL076W                 | MKS1          |
| YGL223C                                          | COG1          | YPL050C                 | MNN9          |
| YHR081W                                          | LRP1          | YLR370C                 | ARC18         |
| YGL078C                                          | DBP3          | YGL124C                 | MON1          |
| YJL183W                                          | MNN11         | YMR038C                 | CCS1          |
| YOR035C                                          | SHE4          | YLR398C                 | SKI2          |
| YHR144C                                          | DCD1          | YPL240C                 | HSP82         |
| YGR072W                                          | UPF3          | YGL223C                 | COG1          |
| YLR234W                                          | TOP3          | YDR183W                 | PLP1          |
| YDR153C                                          | ENT5          | YDR310C                 | SUM1          |
| YMR026C                                          | PEX12         | YGL003C                 | CDH1          |
| YBL079W                                          | NUP170        | YDR207C                 | UME6          |
| YDR320C                                          | SWA2          | YDR207C                 | UME6          |
| YHR013C                                          | ARD1          | YML071C                 | COG8          |
| YPL105C                                          | YPL105C       | YJR033C                 | RAV1          |
| YBR274W                                          | CHK1          | YJL124C                 | LSM1          |
| YKL025C                                          | PAN3          | YNL107W                 | YAF9          |
| YGL251C                                          | HFM1          | YDR378C                 | LSM6          |
| YMR199W                                          | CLN1          | YFL047W                 | RGD2          |
| YLR120C                                          | YPS1          | YHL031C                 | GOS1          |
| YGR072W                                          | UPF3          | YJR040W                 | GEF1          |
| YFL023W                                          | BUD27         | YJR090C                 | GRR1          |
| YDL006W                                          | PTC1          | YHR108W                 | GGA2          |

| Predictions at threshold level 0.80 continued... |               |                         |               |
|--------------------------------------------------|---------------|-------------------------|---------------|
| Gene1 of predicted pair                          |               | Gene2 of predicted pair |               |
| Systematic Name                                  | Standard Name | Systematic Name         | Standard Name |
| YDR320C                                          | SWA2          | YCL037C                 | SRO9          |
| YHL020C                                          | OPI1          | YPR032W                 | SRO7          |
| YIL159W                                          | BNR1          | YLR180W                 | SAM1          |
| YPL115C                                          | BEM3          | YDR144C                 | MKC7          |
| YDL020C                                          | RPN4          | YIL007C                 | NAS2          |
| YJL187C                                          | SWE1          | YJR090C                 | GRR1          |
| YCR020C-A                                        | MAK31         | YDL077C                 | VAM6          |
| YJL124C                                          | LSM1          | YDR207C                 | UME6          |
| YLR410W                                          | VIP1          | YJR135C                 | MCM22         |
| YIL159W                                          | BNR1          | YBR171W                 | SEC66         |
| YCR063W                                          | BUD31         | YPL213W                 | LEA1          |
| YKL116C                                          | PRR1          | YPL057C                 | SUR1          |
| YGR133W                                          | PEX4          | YDR265W                 | PEX10         |
| YJL060W                                          | BNA3          | YBR194W                 | SOY1          |
| YOL121C                                          | RPS19A        | YMR152W                 | YIM1          |
| YIL053W                                          | RHR2          | YNL032W                 | SIW14         |
| YMR055C                                          | BUB2          | YBR195C                 | MSI1          |
| YLR119W                                          | SRN2          | YNL238W                 | KEX2          |
| YDR443C                                          | SSN2          | YFR036W                 | CDC26         |
| YDR289C                                          | RTT103        | YGL246C                 | RAI1          |
| YFR031C-A                                        | RPL2A         | YJL172W                 | CPS1          |
| YMR153W                                          | NUP53         | YBL025W                 | RRN10         |
| YJR140C                                          | HIR3          | YBR195C                 | MSI1          |
| YCR034W                                          | FEN1          | YKR059W                 | TIF1          |
| YMR214W                                          | SCJ1          | YMR230W                 | RPS10B        |
| YLR119W                                          | SRN2          | YOR035C                 | SHE4          |
| YFR031C-A                                        | RPL2A         | YER116C                 | SLX8          |
| YDL006W                                          | PTC1          | YMR054W                 | STV1          |
| YOL111C                                          | MDY2          | YLR320W                 | MMS22         |



| Predictions at threshold level 0.80 continued... |               |                         |               |
|--------------------------------------------------|---------------|-------------------------|---------------|
| Gene1 of predicted pair                          |               | Gene2 of predicted pair |               |
| Systematic Name                                  | Standard Name | Systematic Name         | Standard Name |
| YMR026C                                          | PEX12         | YKL139W                 | CTK1          |
| YOR069W                                          | VPS5          | YJL004C                 | SYS1          |
| YBR215W                                          | HPC2          | YLR350W                 | ORM2          |
| YFR032C-A                                        | RPL29         | YDR245W                 | MNN10         |
| YLL007C                                          | YLL007C       | YHR114W                 | BZZ1          |
| YDL006W                                          | PTC1          | YPL256C                 | CLN2          |
| YNL307C                                          | MCK1          | YGL115W                 | SNF4          |
| YNL243W                                          | SLA2          | YDL047W                 | SIT4          |
| YLR095C                                          | IOC2          | YJL172W                 | CPS1          |
| YHR073W                                          | OSH3          | YNL199C                 | GCR2          |
| YJL172W                                          | CPS1          | YDL223C                 | HBT1          |
| YLR234W                                          | TOP3          | YGL031C                 | RPL24A        |
| YDR108W                                          | GSG1          | YKR020W                 | VPS51         |
| YLR240W                                          | VPS34         | YJL154C                 | VPS35         |
| YIL159W                                          | BNR1          | YMR109W                 | MYO5          |
| YPL195W                                          | APL5          | YBR280C                 | SAF1          |
| YPL057C                                          | SUR1          | YDR358W                 | GGA1          |
| YPR052C                                          | NHP6A         | YNL030W                 | HHF2          |
| YPR084W                                          | YPR084W       | YDR153C                 | ENT5          |
| YDR174W                                          | HMO1          | YJR060W                 | CBF1          |
| YIL076W                                          | SEC28         | YLR320W                 | MMS22         |
| YIL159W                                          | BNR1          | YBR173C                 | UMP1          |
| YCL037C                                          | SRO9          | YML001W                 | YPT7          |
| YCR081W                                          | SRB8          | YLR360W                 | VPS38         |
| YPL018W                                          | CTF19         | YDL047W                 | SIT4          |
| YLR320W                                          | MMS22         | YJR032W                 | CPR7          |
| YOR069W                                          | VPS5          | YNL044W                 | YIP3          |
| YER044C                                          | ERG28         | YJL095W                 | BCK1          |
| YFR036W                                          | CDC26         | YPL195W                 | APL5          |

| Predictions at threshold level 0.80 continued... |               |                         |               |
|--------------------------------------------------|---------------|-------------------------|---------------|
| Gene1 of predicted pair                          |               | Gene2 of predicted pair |               |
| Systematic Name                                  | Standard Name | Systematic Name         | Standard Name |
| YBR114W                                          | RAD16         | YAR014C                 | BUD14         |
| YLR337C                                          | VRP1          | YGL200C                 | EMP24         |
| YDR265W                                          | PEX10         | YGL153W                 | PEX14         |
| YKR059W                                          | TIF1          | YOR039W                 | CKB2          |
| YNL106C                                          | INP52         | YGR071C                 | YGR071C       |
| YNL068C                                          | FKH2          | YKL032C                 | IXR1          |
| YJL124C                                          | LSM1          | YNL236W                 | SIN4          |
| YHR084W                                          | STE12         | YPL220W                 | RPL1A         |
| YJL036W                                          | SNX4          | YDL006W                 | PTC1          |
| YNL297C                                          | MON2          | YPL195W                 | APL5          |
| YOR069W                                          | VPS5          | YGL115W                 | SNF4          |
| YLR386W                                          | VAC14         | YNL054W                 | VAC7          |
| YPL115C                                          | BEM3          | YIL008W                 | URM1          |
| YJL053W                                          | PEP8          | YER122C                 | GLO3          |
| YGL212W                                          | VAM7          | YLR371W                 | ROM2          |
| YFR031C-A                                        | RPL2A         | YGL033W                 | HOP2          |
| YOR080W                                          | DIA2          | YDR171W                 | HSP42         |
| YGR020C                                          | VMA7          | YLR309C                 | IMH1          |
| YKL214C                                          | YRA2          | YCL011C                 | GBP2          |
| YKR035W-A                                        | DID2          | YGL124C                 | MON1          |
| YML103C                                          | NUP188        | YOL081W                 | IRA2          |
| YLR090W                                          | XDJ1          | YNL032W                 | SIW14         |
| YER139C                                          | YER139C       | YER122C                 | GLO3          |
| YKL025C                                          | PAN3          | YOR023C                 | AHC1          |
| YOR195W                                          | SLK19         | YNL225C                 | CNM67         |
| YOR132W                                          | VPS17         | YML001W                 | YPT7          |
| YOR035C                                          | SHE4          | YPL259C                 | APM1          |
| YFR010W                                          | UBP6          | YDL083C                 | RPS16B        |
| YDR245W                                          | MNN10         | YJL124C                 | LSM1          |

| Predictions at threshold level 0.80 continued... |               |                         |               |
|--------------------------------------------------|---------------|-------------------------|---------------|
| Gene1 of predicted pair                          |               | Gene2 of predicted pair |               |
| Systematic Name                                  | Standard Name | Systematic Name         | Standard Name |
| YGL147C                                          | RPL9A         | YGL246C                 | RAI1          |
| YLR386W                                          | VAC14         | YDR130C                 | FIN1          |
| YGR072W                                          | UPF3          | YPR051W                 | MAK3          |
| YPR018W                                          | RLF2          | YFL023W                 | BUD27         |
| YGL153W                                          | PEX14         | YBL072C                 | RPS8A         |
| YER114C                                          | BOI2          | YMR055C                 | BUB2          |
| YLR292C                                          | SEC72         | YPR046W                 | MCM16         |
| YHR205W                                          | SCH9          | YHR012W                 | VPS29         |
| YNL242W                                          | ATG2          | YDL149W                 | ATG9          |
| YOR337W                                          | TEA1          | YGL033W                 | HOP2          |
| YFL026W                                          | STE2          | YDR264C                 | AKR1          |
| YJR024C                                          | MDE1          | YER115C                 | SPR6          |
| YEL009C                                          | GCN4          | YNL107W                 | YAF9          |
| YKL025C                                          | PAN3          | YJL154C                 | VPS35         |
| YOL145C                                          | CTR9          | YGR135W                 | PRE9          |
| YHR060W                                          | VMA22         | YLR370C                 | ARC18         |
| YPL161C                                          | BEM4          | YPL089C                 | RLM1          |
| YMR284W                                          | YKU70         | YDR076W                 | RAD55         |
| YDL184C                                          | RPL41A        | YPL137C                 | GIP3          |
| YML001W                                          | YPT7          | YOR035C                 | SHE4          |
| YDR129C                                          | SAC6          | YOL081W                 | IRA2          |
| YDR293C                                          | SSD1          | YOR132W                 | VPS17         |
| YOR332W                                          | VMA4          | YEL051W                 | VMA8          |
| YDR174W                                          | HMO1          | YGR270W                 | YTA7          |
| YOR195W                                          | SLK19         | YOL054W                 | PSH1          |
| YGL174W                                          | BUD13         | YPL057C                 | SUR1          |
| YBL021C                                          | HAP3          | YJL183W                 | MNN11         |
| YNR052C                                          | POP2          | YBR107C                 | IML3          |
| YLR135W                                          | SLX4          | YHR077C                 | NMD2          |

| Predictions at threshold level 0.80 continued... |               |                         |               |
|--------------------------------------------------|---------------|-------------------------|---------------|
| Gene1 of predicted pair                          |               | Gene2 of predicted pair |               |
| Systematic Name                                  | Standard Name | Systematic Name         | Standard Name |
| YLR447C                                          | VMA6          | YKL048C                 | ELM1          |
| YDR439W                                          | LRS4          | YBR200W                 | BEM1          |
| YDR225W                                          | HTA1          | YGL066W                 | SGF73         |
| YNL106C                                          | INP52         | YGR184C                 | UBR1          |
| YOR023C                                          | AHC1          | YBR171W                 | SEC66         |
| YMR153W                                          | NUP53         | YBR280C                 | SAF1          |
| YOR080W                                          | DIA2          | YPR046W                 | MCM16         |
| YPR051W                                          | MAK3          | YNL166C                 | BNI5          |
| YIL159W                                          | BNR1          | YKL126W                 | YPK1          |
| YBR228W                                          | SLX1          | YDR207C                 | UME6          |
| YDR137W                                          | RGP1          | YDR318W                 | MCM21         |
| YDR108W                                          | GSG1          | YDL077C                 | VAM6          |
| YMR224C                                          | MRE11         | YMR198W                 | CIK1          |
| YGL153W                                          | PEX14         | YDR440W                 | DOT1          |
| YLR337C                                          | VRP1          | YNL215W                 | IES2          |
| YIR009W                                          | MSL1          | YER096W                 | SHC1          |
| YBR173C                                          | UMP1          | YDR477W                 | SNF1          |
| YDL101C                                          | DUN1          | YMR284W                 | YKU70         |
| YCR077C                                          | PAT1          | YDR440W                 | DOT1          |
| YLR399C                                          | BDF1          | YBR289W                 | SNF5          |
| YML115C                                          | VAN1          | YGL223C                 | COG1          |
| YLR320W                                          | MMS22         | YLR371W                 | ROM2          |
| YBR200W                                          | BEM1          | YGR188C                 | BUB1          |
| YNL058C                                          | YNL058C       | YMR133W                 | REC114        |
| YCR081W                                          | SRB8          | YOR008C                 | SLG1          |
| YLR381W                                          | CTF3          | YBR114W                 | RAD16         |
| YDR245W                                          | MNN10         | YFR036W                 | CDC26         |
| YNL054W                                          | VAC7          | YCR086W                 | CSM1          |
| YHR111W                                          | UBA4          | YDR289C                 | RTT103        |

| Predictions at threshold level 0.80 continued... |               |                         |               |
|--------------------------------------------------|---------------|-------------------------|---------------|
| Gene1 of predicted pair                          |               | Gene2 of predicted pair |               |
| Systematic Name                                  | Standard Name | Systematic Name         | Standard Name |
| YLR119W                                          | SRN2          | YER162C                 | RAD4          |
| YDR004W                                          | RAD57         | YDR318W                 | MCM21         |
| YPR017C                                          | DSS4          | YJR060W                 | CBF1          |
| YBR171W                                          | SEC66         | YMR152W                 | YIM1          |
| YOR127W                                          | RGA1          | YJR033C                 | RAV1          |
| YML016C                                          | PPZ1          | YLR399C                 | BDF1          |
| YPR084W                                          | YPR084W       | YPR051W                 | MAK3          |
| YER122C                                          | GLO3          | YOL108C                 | INO4          |
| YOR109W                                          | INP53         | YDL226C                 | GCS1          |
| YKL139W                                          | CTK1          | YCR053W                 | THR4          |
| YLR360W                                          | VPS38         | YBR107C                 | IML3          |
| YNL238W                                          | KEX2          | YLR180W                 | SAM1          |
| YPR017C                                          | DSS4          | YNL044W                 | YIP3          |
| YDR389W                                          | SAC7          | YOR109W                 | INP53         |
| YBR108W                                          | YBR108W       | YGR270W                 | YTA7          |
| YIL148W                                          | RPL40A        | YER110C                 | KAP123        |
| YBR107C                                          | IML3          | YNL225C                 | CNM67         |
| YDL020C                                          | RPN4          | YDR144C                 | MKC7          |
| YBR195C                                          | MSI1          | YDR310C                 | SUM1          |
| YDL184C                                          | RPL41A        | YOR327C                 | SNC2          |
| YLR094C                                          | GIS3          | YNL238W                 | KEX2          |
| YBR171W                                          | SEC66         | YPL234C                 | TFP3          |
| YPL137C                                          | GIP3          | YDR310C                 | SUM1          |
| YHR171W                                          | ATG7          | YBL078C                 | ATG8          |
| YHR060W                                          | VMA22         | YJL095W                 | BCK1          |
| YMR199W                                          | CLN1          | YDL059C                 | RAD59         |
| YOL111C                                          | MDY2          | YNL238W                 | KEX2          |
| YFL047W                                          | RGD2          | YPL256C                 | CLN2          |
| YOR290C                                          | SNF2          | YDR358W                 | GGA1          |

| Predictions at threshold level 0.80 continued... |               |                         |               |
|--------------------------------------------------|---------------|-------------------------|---------------|
| Gene1 of predicted pair                          |               | Gene2 of predicted pair |               |
| Systematic Name                                  | Standard Name | Systematic Name         | Standard Name |
| YLR216C                                          | CPR6          | YGL252C                 | RTG2          |
| YMR039C                                          | SUB1          | YOR368W                 | RAD17         |
| YJL124C                                          | LSM1          | YOR014W                 | RTS1          |
| YER044C                                          | ERG28         | YGL124C                 | MON1          |
| YJR140C                                          | HIR3          | YDR335W                 | MSN5          |
| YMR246W                                          | FAA4          | YKR046C                 | PET10         |
| YEL065W                                          | SIT1          | YLR370C                 | ARC18         |
| YOR106W                                          | VAM3          | YNL107W                 | YAF9          |
| YKL101W                                          | HSL1          | YOR014W                 | RTS1          |
| YMR095C                                          | SNO1          | YER116C                 | SLX8          |
| YKL007W                                          | CAP1          | YMR109W                 | MYO5          |
| YLR315W                                          | NKP2          | YLR254C                 | NDL1          |
| YPL161C                                          | BEM4          | YER139C                 | YER139C       |
| YBR173C                                          | UMP1          | YKL116C                 | PRR1          |
| YPL057C                                          | SUR1          | YLR150W                 | STM1          |
| YPR030W                                          | CSR2          | YLR398C                 | SKI2          |
| YCR034W                                          | FEN1          | YOR368W                 | RAD17         |
| YLR234W                                          | TOP3          | YJL187C                 | SWE1          |
| YDR318W                                          | MCM21         | YNL147W                 | LSM7          |
| YLL007C                                          | YLL007C       | YNL288W                 | CAF40         |
| YKR101W                                          | SIR1          | YDR227W                 | SIR4          |
| YPL256C                                          | CLN2          | YML057W                 | CMP2          |
| YOR023C                                          | AHC1          | YJL190C                 | RPS22A        |
| YEL053C                                          | MAK10         | YDR207C                 | UME6          |
| YLR337C                                          | VRP1          | YMR224C                 | MRE11         |
| YDR484W                                          | VPS52         | YDL223C                 | HBT1          |
| YDL101C                                          | DUN1          | YMR116C                 | ASC1          |
| YDR293C                                          | SSD1          | YJR040W                 | GEF1          |
| YPR017C                                          | DSS4          | YMR054W                 | STV1          |

| Predictions at threshold level 0.80 continued... |               |                         |               |
|--------------------------------------------------|---------------|-------------------------|---------------|
| Gene1 of predicted pair                          |               | Gene2 of predicted pair |               |
| Systematic Name                                  | Standard Name | Systematic Name         | Standard Name |
| YOR080W                                          | DIA2          | YDR207C                 | UME6          |
| YGL033W                                          | HOP2          | YKR099W                 | BAS1          |
| YMR091C                                          | NPL6          | YGR275W                 | RTT102        |
| YKL068W                                          | NUP100        | YML057W                 | CMP2          |
| YJL124C                                          | LSM1          | YDR422C                 | SIP1          |
| YOR083W                                          | WHI5          | YLR381W                 | CTF3          |
| YKR099W                                          | BAS1          | YPL037C                 | EGD1          |
| YDR225W                                          | HTA1          | YDL042C                 | SIR2          |
| YPR173C                                          | VPS4          | YDR486C                 | VPS60         |
| YDR254W                                          | CHL4          | YHR111W                 | UBA4          |
| YJR140C                                          | HIR3          | YBR278W                 | DPB3          |
| YOR132W                                          | VPS17         | YPL105C                 | YPL105C       |
| YGL215W                                          | CLG1          | YAL055W                 | PEX22         |
| YBR108W                                          | YBR108W       | YHR039C-A               | VMA10         |
| YDL116W                                          | NUP84         | YLR352W                 | YLR352W       |
| YBR260C                                          | RGD1          | YPL256C                 | CLN2          |
| YML058W                                          | SML1          | YOR368W                 | RAD17         |
| YGR108W                                          | CLB1          | YOR127W                 | RGA1          |
| YOR127W                                          | RGA1          | YDR507C                 | GIN4          |
| YCR086W                                          | CSM1          | YDR318W                 | MCM21         |
| YFL013C                                          | IES1          | YBR215W                 | HPC2          |
| YPL024W                                          | RMI1          | YMR167W                 | MLH1          |
| YGR014W                                          | MSB2          | YER118C                 | SHO1          |
| YLR337C                                          | VRP1          | YIL008W                 | URM1          |
| YNL238W                                          | KEX2          | YML071C                 | COG8          |
| YLL039C                                          | UBI4          | YJL095W                 | BCK1          |
| YGR054W                                          | YGR054W       | YCR086W                 | CSM1          |
| YAL024C                                          | LTE1          | YLR079W                 | SIC1          |
| YMR153W                                          | NUP53         | YDR484W                 | VPS52         |

| Predictions at threshold level 0.80 continued... |               |                         |               |
|--------------------------------------------------|---------------|-------------------------|---------------|
| Gene1 of predicted pair                          |               | Gene2 of predicted pair |               |
| Systematic Name                                  | Standard Name | Systematic Name         | Standard Name |
| YNL041C                                          | COG6          | YJL183W                 | MNN11         |
| YGR054W                                          | YGR054W       | YDR318W                 | MCM21         |
| YNL288W                                          | CAF40         | YJL095W                 | BCK1          |
| YOR080W                                          | DIA2          | YGL003C                 | CDH1          |
| YFR032C-A                                        | RPL29         | YOR275C                 | RIM20         |
| YOR275C                                          | RIM20         | YLR425W                 | TUS1          |
| YMR198W                                          | CIK1          | YGL115W                 | SNF4          |
| YHR081W                                          | LRP1          | YNL076W                 | MKS1          |
| YOR080W                                          | DIA2          | YAL002W                 | VPS8          |
| YDR108W                                          | GSG1          | YPL195W                 | APL5          |
| YEL053C                                          | MAK10         | YEL060C                 | PRB1          |
| YMR172W                                          | HOT1          | YDL155W                 | CLB3          |
| YML016C                                          | PPZ1          | YHR012W                 | VPS29         |
| YDR083W                                          | RRP8          | YHR081W                 | LRP1          |
| YGL200C                                          | EMP24         | YBL101C                 | ECM21         |
| YGL054C                                          | ERV14         | YOL018C                 | TLG2          |
| YBR200W                                          | BEM1          | YBR082C                 | UBC4          |
| YPL213W                                          | LEA1          | YJL095W                 | BCK1          |
| YMR142C                                          | RPL13B        | YLR320W                 | MMS22         |
| YLR320W                                          | MMS22         | YGR135W                 | PRE9          |
| YPL161C                                          | BEM4          | YPL018W                 | CTF19         |
| YJL006C                                          | CTK2          | YDR440W                 | DOT1          |
| YDR378C                                          | LSM6          | YPL018W                 | CTF19         |
| YDR293C                                          | SSD1          | YGR188C                 | BUB1          |
| YLR337C                                          | VRP1          | YGL151W                 | NUT1          |
| YMR153W                                          | NUP53         | YMR164C                 | MSS11         |
| YDR318W                                          | MCM21         | YAL002W                 | VPS8          |
| YDR225W                                          | HTA1          | YPR046W                 | MCM16         |
| YGL237C                                          | HAP2          | YDR144C                 | MKC7          |



| Predictions at threshold level 0.80 continued... |               |                         |               |
|--------------------------------------------------|---------------|-------------------------|---------------|
| Gene1 of predicted pair                          |               | Gene2 of predicted pair |               |
| Systematic Name                                  | Standard Name | Systematic Name         | Standard Name |
| YIL076W                                          | SEC28         | YJR032W                 | CPR7          |
| YLR447C                                          | VMA6          | YDL155W                 | CLB3          |
| YGL223C                                          | COG1          | YOL108C                 | INO4          |
| YBR173C                                          | UMP1          | YNL041C                 | COG6          |
| YHR200W                                          | RPN10         | YER040W                 | GLN3          |
| YLR441C                                          | RPS1A         | YPR046W                 | MCM16         |
| YER122C                                          | GLO3          | YDR310C                 | SUM1          |
| YDR484W                                          | VPS52         | YHR081W                 | LRP1          |
| YDL127W                                          | PCL2          | YDR146C                 | SWI5          |
| YOR213C                                          | SAS5          | YOR308C                 | SNU66         |
| YBL103C                                          | RTG3          | YGL003C                 | CDH1          |
| YMR133W                                          | REC114        | YER162C                 | RAD4          |
| YJL176C                                          | SWI3          | YGL135W                 | RPL1B         |
| YPR036W                                          | VMA13         | YHR200W                 | RPN10         |
| YMR039C                                          | SUB1          | YPL001W                 | HAT1          |
| YCR086W                                          | CSM1          | YBR114W                 | RAD16         |
| YIL076W                                          | SEC28         | YOR035C                 | SHE4          |
| YLR150W                                          | STM1          | YGR188C                 | BUB1          |
| YLR337C                                          | VRP1          | YOR008C                 | SLG1          |
| YLR360W                                          | VPS38         | YEL036C                 | ANP1          |
| YBR030W                                          | YBR030W       | YEL053C                 | MAK10         |
| YBR042C                                          | CST26         | YKL041W                 | VPS24         |
| YAL024C                                          | LTE1          | YAR014C                 | BUD14         |
| YFL013C                                          | IES1          | YEL013W                 | VAC8          |
| YDR129C                                          | SAC6          | YDR484W                 | VPS52         |
| YHR111W                                          | UBA4          | YGR188C                 | BUB1          |
| YCL037C                                          | SRO9          | YLR315W                 | NKP2          |
| YKL048C                                          | ELM1          | YPL195W                 | APL5          |
| YNL068C                                          | FKH2          | YBR200W                 | BEM1          |

| Predictions at threshold level 0.80 continued... |               |                         |               |
|--------------------------------------------------|---------------|-------------------------|---------------|
| Gene1 of predicted pair                          |               | Gene2 of predicted pair |               |
| Systematic Name                                  | Standard Name | Systematic Name         | Standard Name |
| YDL077C                                          | VAM6          | YEL060C                 | PRB1          |
| YDL116W                                          | NUP84         | YDL226C                 | GCS1          |
| YCL001W                                          | RER1          | YDR153C                 | ENT5          |
| YBR107C                                          | IML3          | YIL103W                 | DPH1          |
| YFL026W                                          | STE2          | YLR206W                 | ENT2          |
| YLR234W                                          | TOP3          | YGR081C                 | SLX9          |
| YJL154C                                          | VPS35         | YGL095C                 | VPS45         |
| YLR090W                                          | XDJ1          | YJR032W                 | CPR7          |
| YMR202W                                          | ERG2          | YDR080W                 | VPS41         |
| YOL126C                                          | MDH2          | YGL016W                 | KAP122        |
| YDR320C                                          | SWA2          | YAL002W                 | VPS8          |
| YIL103W                                          | DPH1          | YDR318W                 | MCM21         |
| YOL111C                                          | MDY2          | YDR358W                 | GGA1          |
| YBR215W                                          | HPC2          | YGR188C                 | BUB1          |
| YKR001C                                          | VPS1          | YML071C                 | COG8          |
| YDL116W                                          | NUP84         | YOL091W                 | SPO21         |
| YGR249W                                          | MGA1          | YDR310C                 | SUM1          |
| YMR202W                                          | ERG2          | YKR048C                 | NAP1          |
| YGR249W                                          | MGA1          | YER116C                 | SLX8          |
| YDL077C                                          | VAM6          | YNL051W                 | COG5          |
| YOR290C                                          | SNF2          | YDR137W                 | RGP1          |
| YLR320W                                          | MMS22         | YDR358W                 | GGA1          |
| YMR068W                                          | AVO2          | YPL180W                 | TCO89         |
| YPR046W                                          | MCM16         | YLR254C                 | NDL1          |
| YFR031C-A                                        | RPL2A         | YKL139W                 | CTK1          |
| YBR107C                                          | IML3          | YLR410W                 | VIP1          |
| YER139C                                          | YER139C       | YNL107W                 | YAF9          |
| YLR386W                                          | VAC14         | YJL095W                 | BCK1          |
| YFR031C-A                                        | RPL2A         | YMR054W                 | STV1          |

| Predictions at threshold level 0.80 continued... |               |                         |               |
|--------------------------------------------------|---------------|-------------------------|---------------|
| Gene1 of predicted pair                          |               | Gene2 of predicted pair |               |
| Systematic Name                                  | Standard Name | Systematic Name         | Standard Name |
| YIL053W                                          | RHR2          | YJL172W                 | CPS1          |
| YML103C                                          | NUP188        | YMR055C                 | BUB2          |
| YIL156W                                          | UBP7          | YGR059W                 | SPR3          |
| YBR127C                                          | VMA2          | YJL029C                 | VPS53         |
| YLR370C                                          | ARC18         | YOL081W                 | IRA2          |
| YKL048C                                          | ELM1          | YGL031C                 | RPL24A        |
| YLR095C                                          | IOC2          | YJR084W                 | CSN12         |
| YOR023C                                          | AHC1          | YKL048C                 | ELM1          |
| YMR172W                                          | HOT1          | YDR144C                 | MKC7          |
| YHR134W                                          | WSS1          | YJR032W                 | CPR7          |
| YPR051W                                          | MAK3          | YML001W                 | YPT7          |
| YFR010W                                          | UBP6          | YOR038C                 | HIR2          |
| YLR320W                                          | MMS22         | YHR081W                 | LRP1          |
| YNL058C                                          | YNL058C       | YHR200W                 | RPN10         |
| YKR020W                                          | VPS51         | YKR014C                 | YPT52         |
| YJL138C                                          | TIF2          | YGL250W                 | RMR1          |
| YDR439W                                          | LRS4          | YLR381W                 | CTF3          |
| YHR178W                                          | STB5          | YJR090C                 | GRR1          |
| YGR249W                                          | MGA1          | YJR084W                 | CSN12         |
| YEL065W                                          | SIT1          | YDL192W                 | ARF1          |
| YGR054W                                          | YGR054W       | YDR144C                 | MKC7          |
| YFR036W                                          | CDC26         | YPR046W                 | MCM16         |
| YJR024C                                          | MDE1          | YBL079W                 | NUP170        |
| YKL117W                                          | SBA1          | YJR032W                 | CPR7          |
| YDR129C                                          | SAC6          | YBL047C                 | EDE1          |
| YDR443C                                          | SSN2          | YJL095W                 | BCK1          |
| YOR083W                                          | WHI5          | YNL236W                 | SIN4          |
| YPL037C                                          | EGD1          | YPR032W                 | SRO7          |
| YOR071C                                          | THI71         | YFL044C                 | OTU1          |

| Predictions at threshold level 0.80 continued... |               |                         |               |
|--------------------------------------------------|---------------|-------------------------|---------------|
| Gene1 of predicted pair                          |               | Gene2 of predicted pair |               |
| Systematic Name                                  | Standard Name | Systematic Name         | Standard Name |
| YNL094W                                          | APP1          | YGR268C                 | HUA1          |
| YHR060W                                          | VMA22         | YKR035W-A               | DID2          |
| YMR224C                                          | MRE11         | YNL215W                 | IES2          |
| YDR146C                                          | SWI5          | YPL001W                 | HAT1          |
| YLR079W                                          | SIC1          | YDR477W                 | SNF1          |
| YOR290C                                          | SNF2          | YPL037C                 | EGD1          |
| YMR116C                                          | ASC1          | YMR284W                 | YKU70         |
| YKL213C                                          | DOA1          | YKL160W                 | ELF1          |
| YOR001W                                          | RRP6          | YIR005W                 | IST3          |
| YER144C                                          | UBP5          | YPL137C                 | GIP3          |
| YPR046W                                          | MCM16         | YMR230W                 | RPS10B        |
| YBR200W                                          | BEM1          | YKL126W                 | YPK1          |
| YBR215W                                          | HPC2          | YHR039C-A               | VMA10         |
| YDR439W                                          | LRS4          | YLR399C                 | BDF1          |
| YOR023C                                          | AHC1          | YGL124C                 | MON1          |
| YFR031C-A                                        | RPL2A         | YDR153C                 | ENT5          |
| YNL201C                                          | PSY2          | YHR115C                 | DMA1          |
| YHR152W                                          | SPO12         | YGL031C                 | RPL24A        |
| YAL024C                                          | LTE1          | YBL008W                 | HIR1          |
| YML102W                                          | CAC2          | YKL160W                 | ELF1          |
| YBR173C                                          | UMP1          | YDR261C                 | EXG2          |
| YOL126C                                          | MDH2          | YPL178W                 | CBC2          |
| YNL166C                                          | BNI5          | YNL107W                 | YAF9          |
| YDL059C                                          | RAD59         | YBR073W                 | RDH54         |
| YJR135C                                          | MCM22         | YGL253W                 | HXK2          |
| YDR174W                                          | HMO1          | YOL081W                 | IRA2          |
| YMR216C                                          | SKY1          | YEL051W                 | VMA8          |
| YLR370C                                          | ARC18         | YEL036C                 | ANP1          |
| YFR024C-A                                        | LSB3          | YJL151C                 | SNA3          |

| Predictions at threshold level 0.80 continued... |               |                         |               |
|--------------------------------------------------|---------------|-------------------------|---------------|
| Gene1 of predicted pair                          |               | Gene2 of predicted pair |               |
| Systematic Name                                  | Standard Name | Systematic Name         | Standard Name |
| YGL163C                                          | RAD54         | YDL155W                 | CLB3          |
| YML016C                                          | PPZ1          | YGL163C                 | RAD54         |
| YCR020C-A                                        | MAK31         | YDR080W                 | VPS41         |
| YGR019W                                          | UGA1          | YJL095W                 | BCK1          |
| YMR039C                                          | SUB1          | YOR043W                 | WHI2          |
| YLR079W                                          | SIC1          | YDR439W                 | LRS4          |
| YDL185W                                          | TFP1          | YPL234C                 | TFP3          |
| YPL024W                                          | RMI1          | YGR188C                 | BUB1          |
| YOR008C                                          | SLG1          | YMR311C                 | GLC8          |
| YDR129C                                          | SAC6          | YDL192W                 | ARF1          |
| YLR386W                                          | VAC14         | YLR315W                 | NKP2          |
| YNL293W                                          | MSB3          | YGL198W                 | YIP4          |
| YBR131W                                          | CCZ1          | YLR447C                 | VMA6          |
| YIL034C                                          | CAP2          | YGL124C                 | MON1          |
| YPL115C                                          | BEM3          | YGR054W                 | YGR054W       |
| YEL044W                                          | IES6          | YKL041W                 | VPS24         |
| YFL023W                                          | BUD27         | YDR310C                 | SUM1          |
| YLR381W                                          | CTF3          | YGR184C                 | UBR1          |
| YHR012W                                          | VPS29         | YMR022W                 | UBC7          |
| YLR079W                                          | SIC1          | YOR140W                 | SFL1          |
| YDR440W                                          | DOT1          | YAL002W                 | VPS8          |
| YGL038C                                          | OCH1          | YJL187C                 | SWE1          |
| YOR132W                                          | VPS17         | YCL037C                 | SRO9          |
| YDR261C                                          | EXG2          | YOR035C                 | SHE4          |
| YJR135C                                          | MCM22         | YGR188C                 | BUB1          |
| YKL160W                                          | ELF1          | YDR289C                 | RTT103        |
| YDR477W                                          | SNF1          | YJR032W                 | CPR7          |
| YNL201C                                          | PSY2          | YMR224C                 | MRE11         |
| YJL006C                                          | CTK2          | YJR005W                 | APL1          |

| Predictions at threshold level 0.80 continued... |               |                         |               |
|--------------------------------------------------|---------------|-------------------------|---------------|
| Gene1 of predicted pair                          |               | Gene2 of predicted pair |               |
| Systematic Name                                  | Standard Name | Systematic Name         | Standard Name |
| YDL116W                                          | NUP84         | YOL054W                 | PSH1          |
| YOR080W                                          | DIA2          | YPL253C                 | VIK1          |
| YER107C                                          | GLE2          | YLR085C                 | ARP6          |
| YKL116C                                          | PRR1          | YLR452C                 | SST2          |
| YDL184C                                          | RPL41A        | YER162C                 | RAD4          |
| YDL083C                                          | RPS16B        | YNL076W                 | MKS1          |
| YOR195W                                          | SLK19         | YIL036W                 | CST6          |
| YDL020C                                          | RPN4          | YAR014C                 | BUD14         |
| YPR017C                                          | DSS4          | YNL069C                 | RPL16B        |
| YDL006W                                          | PTC1          | YMR089C                 | YTA12         |
| YPL057C                                          | SUR1          | YNR072W                 | HXT17         |
| YPL161C                                          | BEM4          | YKR048C                 | NAP1          |
| YHR119W                                          | SET1          | YGL058W                 | RAD6          |
| YNL289W                                          | PCL1          | YLR425W                 | TUS1          |
| YNL238W                                          | KEX2          | YJL004C                 | SYS1          |
| YNL054W                                          | VAC7          | YML112W                 | CTK3          |
| YDR264C                                          | AKR1          | YJL095W                 | BCK1          |
| YMR224C                                          | MRE11         | YLR357W                 | RSC2          |
| YJL036W                                          | SNX4          | YJR040W                 | GEF1          |
| YGL212W                                          | VAM7          | YPL234C                 | TFP3          |
| YFL023W                                          | BUD27         | YCR053W                 | THR4          |
| YJR032W                                          | CPR7          | YEL056W                 | HAT2          |
| YMR055C                                          | BUB2          | YIR005W                 | IST3          |
| YKL139W                                          | CTK1          | YGL174W                 | BUD13         |
| YER110C                                          | KAP123        | YDR318W                 | MCM21         |
| YGR252W                                          | GCN5          | YPL248C                 | GAL4          |
| YHR073W                                          | OSH3          | YCR024C-A               | PMP1          |
| YPL022W                                          | RAD1          | YPR120C                 | CLB5          |
| YMR055C                                          | BUB2          | YLR032W                 | RAD5          |

| Predictions at threshold level 0.80 continued... |               |                         |               |
|--------------------------------------------------|---------------|-------------------------|---------------|
| Gene1 of predicted pair                          |               | Gene2 of predicted pair |               |
| Systematic Name                                  | Standard Name | Systematic Name         | Standard Name |
| YBR010W                                          | HHT1          | YOR064C                 | YNG1          |
| YCR066W                                          | RAD18         | YDL077C                 | VAM6          |
| YLR452C                                          | SST2          | YPR030W                 | CSR2          |
| YFR031C-A                                        | RPL2A         | YDR358W                 | GGA1          |
| YML115C                                          | VAN1          | YKL041W                 | VPS24         |
| YER139C                                          | YER139C       | YBL025W                 | RRN10         |
| YGR072W                                          | UPF3          | YMR004W                 | MVP1          |
| YMR224C                                          | MRE11         | YBL058W                 | SHP1          |
| YPL024W                                          | RMI1          | YHR178W                 | STB5          |
| YJL172W                                          | CPS1          | YHR039C-A               | VMA10         |
| YDR261C                                          | EXG2          | YPR030W                 | CSR2          |
| YGR019W                                          | UGA1          | YJL183W                 | MNN11         |
| YNL069C                                          | RPL16B        | YPL037C                 | EGD1          |
| YER122C                                          | GLO3          | YLR350W                 | ORM2          |
| YNR052C                                          | POP2          | YJR060W                 | CBF1          |
| YLR288C                                          | MEC3          | YML102W                 | CAC2          |
| YDR395W                                          | SXM1          | YDL116W                 | NUP84         |
| YOR195W                                          | SLK19         | YOR275C                 | RIM20         |
| YNL201C                                          | PSY2          | YNL116W                 | DMA2          |
| YPL158C                                          | YPL158C       | YPL256C                 | CLN2          |
| YJR140C                                          | HIR3          | YKL101W                 | HSL1          |
| YAL024C                                          | LTE1          | YKL101W                 | HSL1          |
| YPR084W                                          | YPR084W       | YDR378C                 | LSM6          |
| YBL102W                                          | SFT2          | YML038C                 | YMD8          |
| YHR178W                                          | STB5          | YML097C                 | VPS9          |
| YOR127W                                          | RGA1          | YGL038C                 | OCH1          |
| YBR200W                                          | BEM1          | YGL252C                 | RTG2          |
| YLR109W                                          | AHP1          | YML028W                 | TSA1          |
| YLR447C                                          | VMA6          | YDR254W                 | CHL4          |

| Predictions at threshold level 0.80 continued... |               |                         |               |
|--------------------------------------------------|---------------|-------------------------|---------------|
| Gene1 of predicted pair                          |               | Gene2 of predicted pair |               |
| Systematic Name                                  | Standard Name | Systematic Name         | Standard Name |
| YKL139W                                          | CTK1          | YJL183W                 | MNN11         |
| YGL223C                                          | COG1          | YER122C                 | GLO3          |
| YNL058C                                          | YNL058C       | YPL137C                 | GIP3          |
| YGL190C                                          | CDC55         | YEL003W                 | GIM4          |
| YDL020C                                          | RPN4          | YJL190C                 | RPS22A        |
| YIL036W                                          | CST6          | YDR335W                 | MSN5          |
| YNL106C                                          | INP52         | YCL037C                 | SRO9          |
| YDL006W                                          | PTC1          | YLR425W                 | TUS1          |
| YFR010W                                          | UBP6          | YOR243C                 | PUS7          |
| YPL115C                                          | BEM3          | YJL157C                 | FAR1          |
| YDR004W                                          | RAD57         | YBR036C                 | CSG2          |
| YBL025W                                          | RRN10         | YKL041W                 | VPS24         |
| YLR191W                                          | PEX13         | YPR119W                 | CLB2          |
| YKL139W                                          | CTK1          | YMR230W                 | RPS10B        |
| YLR090W                                          | XDJ1          | YAL024C                 | LTE1          |
| YPL106C                                          | SSE1          | YPR119W                 | CLB2          |
| YPR046W                                          | MCM16         | YKL114C                 | APN1          |
| YOR195W                                          | SLK19         | YBR215W                 | HPC2          |
| YLR119W                                          | SRN2          | YER116C                 | SLX8          |
| YBL058W                                          | SHP1          | YIL076W                 | SEC28         |
| YJL053W                                          | PEP8          | YDR153C                 | ENT5          |
| YNL054W                                          | VAC7          | YPR046W                 | MCM16         |
| YGL178W                                          | MPT5          | YGL058W                 | RAD6          |
| YKL126W                                          | YPK1          | YER162C                 | RAD4          |
| YEL065W                                          | SIT1          | YLR094C                 | GIS3          |
| YLR386W                                          | VAC14         | YPL256C                 | CLN2          |
| YKR061W                                          | KTR2          | YNL116W                 | DMA2          |
| YNL201C                                          | PSY2          | YMR055C                 | BUB2          |
| YFR031C-A                                        | RPL2A         | YCR066W                 | RAD18         |



| Predictions at threshold level 0.80 continued... |               |                         |               |
|--------------------------------------------------|---------------|-------------------------|---------------|
| Gene1 of predicted pair                          |               | Gene2 of predicted pair |               |
| Systematic Name                                  | Standard Name | Systematic Name         | Standard Name |
| YPR051W                                          | MAK3          | YPL120W                 | VPS30         |
| YGR275W                                          | RTT102        | YHL025W                 | SNF6          |
| YPR084W                                          | YPR084W       | YOR001W                 | RRP6          |
| YGL078C                                          | DBP3          | YFR036W                 | CDC26         |
| YNL307C                                          | MCK1          | YDL083C                 | RPS16B        |
| YER116C                                          | SLX8          | YOR035C                 | SHE4          |
| YMR109W                                          | MYO5          | YIL008W                 | URM1          |
| YDL006W                                          | PTC1          | YDR207C                 | UME6          |
| YKR001C                                          | VPS1          | YLR309C                 | IMH1          |
| YGL250W                                          | RMR1          | YCR031C                 | RPS14A        |
| YLR170C                                          | APS1          | YOL062C                 | APM4          |
| YDR004W                                          | RAD57         | YBR173C                 | UMP1          |
| YGL147C                                          | RPL9A         | YGL115W                 | SNF4          |
| YBR171W                                          | SEC66         | YDL077C                 | VAM6          |
| YIL053W                                          | RHR2          | YGL124C                 | MON1          |
| YML038C                                          | YMD8          | YOL018C                 | TLG2          |
| YDL013W                                          | SLX5          | YML028W                 | TSA1          |
| YKL139W                                          | CTK1          | YML016C                 | PPZ1          |
| YER044C                                          | ERG28         | YMR152W                 | YIM1          |
| YHR039C-A                                        | VMA10         | YKL119C                 | VPH2          |
| YDL113C                                          | ATG20         | YJL036W                 | SNX4          |
| YFR031C-A                                        | RPL2A         | YLR371W                 | ROM2          |
| YMR142C                                          | RPL13B        | YLR093C                 | NYV1          |
| YDR174W                                          | HMO1          | YKL048C                 | ELM1          |
| YML038C                                          | YMD8          | YOR327C                 | SNC2          |
| YFR031C-A                                        | RPL2A         | YBR019C                 | GAL10         |
| YPL129W                                          | TAF14         | YJL140W                 | RPB4          |
| YDL056W                                          | MBP1          | YPR119W                 | CLB2          |
| YHR178W                                          | STB5          | YJR135C                 | MCM22         |

| Predictions at threshold level 0.80 continued... |               |                         |               |
|--------------------------------------------------|---------------|-------------------------|---------------|
| Gene1 of predicted pair                          |               | Gene2 of predicted pair |               |
| Systematic Name                                  | Standard Name | Systematic Name         | Standard Name |
| YMR153W                                          | NUP53         | YMR199W                 | CLN1          |
| YOR195W                                          | SLK19         | YJR135C                 | MCM22         |
| YDR137W                                          | RGP1          | YEL060C                 | PRB1          |
| YER044C                                          | ERG28         | YEL060C                 | PRB1          |
| YLR095C                                          | IOC2          | YKL048C                 | ELM1          |
| YBL079W                                          | NUP170        | YFL047W                 | RGD2          |
| YKR099W                                          | BAS1          | YDR261C                 | EXG2          |
| YER114C                                          | BOI2          | YPL161C                 | BEM4          |
| YDR076W                                          | RAD55         | YDR289C                 | RTT103        |
| YPR131C                                          | NAT3          | YJR035W                 | RAD26         |
| YEL065W                                          | SIT1          | YMR016C                 | SOK2          |
| YLR371W                                          | ROM2          | YPL256C                 | CLN2          |
| YHR156C                                          | LIN1          | YEL053C                 | MAK10         |
| YGR261C                                          | APL6          | YGL223C                 | COG1          |
| YDR477W                                          | SNF1          | YOR140W                 | SFL1          |
| YHR111W                                          | UBA4          | YML112W                 | CTK3          |
| YDL083C                                          | RPS16B        | YCR053W                 | THR4          |
| YPL195W                                          | APL5          | YNL051W                 | COG5          |
| YPL137C                                          | GIP3          | YCR053W                 | THR4          |
| YMR153W                                          | NUP53         | YDL223C                 | HBT1          |
| YEL009C                                          | GCN4          | YBR289W                 | SNF5          |
| YLR018C                                          | POM34         | YML103C                 | NUP188        |
| YLL039C                                          | UBI4          | YDL223C                 | HBT1          |
| YPR046W                                          | MCM16         | YGL253W                 | HXK2          |
| YPR046W                                          | MCM16         | YGR188C                 | BUB1          |
| YML071C                                          | COG8          | YAL002W                 | VPS8          |
| YNL166C                                          | BNI5          | YCR086W                 | CSM1          |
| YPL161C                                          | BEM4          | YOL121C                 | RPS19A        |
| YNL215W                                          | IES2          | YAR014C                 | BUD14         |

| Predictions at threshold level 0.80 continued... |               |                         |               |
|--------------------------------------------------|---------------|-------------------------|---------------|
| Gene1 of predicted pair                          |               | Gene2 of predicted pair |               |
| Systematic Name                                  | Standard Name | Systematic Name         | Standard Name |
| YPL024W                                          | RMI1          | YJL095W                 | BCK1          |
| YDR383C                                          | NKP1          | YLR182W                 | SWI6          |
| YBR217W                                          | ATG12         | YNL307C                 | MCK1          |
| YPR052C                                          | NHP6A         | YNL236W                 | SIN4          |
| YLR288C                                          | MEC3          | YML115C                 | VAN1          |
| YBR127C                                          | VMA2          | YDL226C                 | GCS1          |
| YMR109W                                          | MYO5          | YLR370C                 | ARC18         |
| YDR477W                                          | SNF1          | YNL079C                 | TPM1          |
| YHR200W                                          | RPN10         | YLR371W                 | ROM2          |
| YHR134W                                          | WSS1          | YGR270W                 | YTA7          |
| YLR360W                                          | VPS38         | YNL041C                 | COG6          |
| YMR089C                                          | YTA12         | YKL041W                 | VPS24         |
| YPL022W                                          | RAD1          | YDL013W                 | SLX5          |
| YPR017C                                          | DSS4          | YGR261C                 | APL6          |
| YHR084W                                          | STE12         | YJL128C                 | PBS2          |
| YNL058C                                          | YNL058C       | YPR030W                 | CSR2          |
| YLR381W                                          | CTF3          | YAR014C                 | BUD14         |
| YDR137W                                          | RGP1          | YEL053C                 | MAK10         |
| YDR484W                                          | VPS52         | YOR290C                 | SNF2          |
| YPR046W                                          | MCM16         | YOL081W                 | IRA2          |
| YLR381W                                          | CTF3          | YOL067C                 | RTG1          |
| YBR200W                                          | BEM1          | YHR205W                 | SCH9          |
| YCL037C                                          | SRO9          | YNL041C                 | COG6          |
| YPL158C                                          | YPL158C       | YNL079C                 | TPM1          |
| YDL116W                                          | NUP84         | YMR273C                 | ZDS1          |
| YDR293C                                          | SSD1          | YGL253W                 | HXK2          |
| YKR001C                                          | VPS1          | YER122C                 | GLO3          |
| YDR146C                                          | SWI5          | YPR120C                 | CLB5          |
| YER179W                                          | DMC1          | YDR146C                 | SWI5          |

| Predictions at threshold level 0.80 continued... |               |                         |               |
|--------------------------------------------------|---------------|-------------------------|---------------|
| Gene1 of predicted pair                          |               | Gene2 of predicted pair |               |
| Systematic Name                                  | Standard Name | Systematic Name         | Standard Name |
| YGL212W                                          | VAM7          | YOR066W                 | MSA1          |
| YNL199C                                          | GCR2          | YOR038C                 | HIR2          |
| YOR195W                                          | SLK19         | YOL081W                 | IRA2          |
| YHR178W                                          | STB5          | YLR386W                 | VAC14         |
| YPR030W                                          | CSR2          | YOL121C                 | RPS19A        |
| YNL041C                                          | COG6          | YLR357W                 | RSC2          |
| YBR200W                                          | BEM1          | YNL107W                 | YAF9          |
| YGL223C                                          | COG1          | YNR032W                 | PPG1          |
| YOL018C                                          | TLG2          | YPR032W                 | SRO7          |
| YGL087C                                          | MMS2          | YNL288W                 | CAF40         |
| YPL137C                                          | GIP3          | YDL192W                 | ARF1          |
| YBL078C                                          | ATG8          | YDR080W                 | VPS41         |
| YLR360W                                          | VPS38         | YNL238W                 | KEX2          |
| YDR156W                                          | RPA14         | YNL107W                 | YAF9          |
| YDR320C                                          | SWA2          | YJR033C                 | RAV1          |
| YMR284W                                          | YKU70         | YDR469W                 | SDC1          |
| YDL006W                                          | PTC1          | YOL081W                 | IRA2          |
| YGR104C                                          | SRB5          | YPR072W                 | NOT5          |
| YNL031C                                          | HHT2          | YDR440W                 | DOT1          |
| YER174C                                          | GRX4          | YGR262C                 | BUD32         |
| YDL006W                                          | PTC1          | YNL127W                 | FAR11         |
| YKL010C                                          | UFD4          | YDR245W                 | MNN10         |
| YDR245W                                          | MNN10         | YLR371W                 | ROM2          |
| YMR039C                                          | SUB1          | YJR140C                 | HIR3          |
| YNL106C                                          | INP52         | YGL163C                 | RAD54         |
| YMR224C                                          | MRE11         | YLR381W                 | CTF3          |
| YMR016C                                          | SOK2          | YMR037C                 | MSN2          |
| YDR156W                                          | RPA14         | YLR371W                 | ROM2          |
| YDR156W                                          | RPA14         | YDR245W                 | MNN10         |

| Predictions at threshold level 0.80 continued... |               |                         |               |
|--------------------------------------------------|---------------|-------------------------|---------------|
| Gene1 of predicted pair                          |               | Gene2 of predicted pair |               |
| Systematic Name                                  | Standard Name | Systematic Name         | Standard Name |
| YGL124C                                          | MON1          | YAL002W                 | VPS8          |
| YKR020W                                          | VPS51         | YGL124C                 | MON1          |
| YKL048C                                          | ELM1          | YGL253W                 | HXK2          |
| YAL024C                                          | LTE1          | YDR439W                 | LRS4          |
| YBL021C                                          | HAP3          | YDL155W                 | CLB3          |
| YIL036W                                          | CST6          | YNL248C                 | RPA49         |
| YDL223C                                          | HBT1          | YBR280C                 | SAF1          |
| YDR439W                                          | LRS4          | YCR086W                 | CSM1          |
| YJL138C                                          | TIF2          | YOR368W                 | RAD17         |
| YCR088W                                          | ABP1          | YJL029C                 | VPS53         |
| YGL060W                                          | YBP2          | YJR135C                 | MCM22         |
| YDL059C                                          | RAD59         | YDR363W-A               | SEM1          |
| YMR311C                                          | GLC8          | YMR214W                 | SCJ1          |
| YGL078C                                          | DBP3          | YLR192C                 | HCR1          |
| YBR264C                                          | YPT10         | YML001W                 | YPT7          |
| YBR274W                                          | CHK1          | YML016C                 | PPZ1          |
| YOR127W                                          | RGA1          | YBR200W                 | BEM1          |
| YLR360W                                          | VPS38         | YOL067C                 | RTG1          |
| YNL166C                                          | BNI5          | YEL053C                 | MAK10         |
| YGL033W                                          | HOP2          | YHR156C                 | LIN1          |
| YOR290C                                          | SNF2          | YDL077C                 | VAM6          |
| YLR095C                                          | IOC2          | YJL095W                 | BCK1          |
| YPR017C                                          | DSS4          | YBL102W                 | SFT2          |
| YNL307C                                          | MCK1          | YPR046W                 | MCM16         |
| YNL139C                                          | RLR1          | YCL011C                 | GBP2          |
| YJR059W                                          | PTK2          | YKL068W                 | NUP100        |
| YBR020W                                          | GAL1          | YKL160W                 | ELF1          |
| YIL156W                                          | UBP7          | YOR358W                 | HAP5          |
| YDL006W                                          | PTC1          | YPL120W                 | VPS30         |

| Predictions at threshold level 0.80 continued... |               |                         |               |
|--------------------------------------------------|---------------|-------------------------|---------------|
| Gene1 of predicted pair                          |               | Gene2 of predicted pair |               |
| Systematic Name                                  | Standard Name | Systematic Name         | Standard Name |
| YJR084W                                          | CSN12         | YBL025W                 | RRN10         |
| YML016C                                          | PPZ1          | YHR115C                 | DMA1          |
| YPL042C                                          | SSN3          | YGL237C                 | HAP2          |
| YLR080W                                          | EMP46         | YFL048C                 | EMP47         |
| YBR215W                                          | HPC2          | YDR254W                 | CHL4          |
| YLR386W                                          | VAC14         | YDR440W                 | DOT1          |
| YLR234W                                          | TOP3          | YAL002W                 | VPS8          |
| YKR001C                                          | VPS1          | YDR076W                 | RAD55         |
| YNL041C                                          | COG6          | YDR310C                 | SUM1          |
| YGL115W                                          | SNF4          | YPR120C                 | CLB5          |
| YOR327C                                          | SNC2          | YDR207C                 | UME6          |
| YDL116W                                          | NUP84         | YML012W                 | ERV25         |
| YLR452C                                          | SST2          | YDL192W                 | ARF1          |
| YJL176C                                          | SWI3          | YLL039C                 | UBI4          |
| YNR058W                                          | BIO3          | YFR021W                 | ATG18         |
| YOR195W                                          | SLK19         | YJL006C                 | CTK2          |
| YDR477W                                          | SNF1          | YGR252W                 | GCN5          |
| YEL044W                                          | IES6          | YJL095W                 | BCK1          |
| YOR195W                                          | SLK19         | YDR183W                 | PLP1          |
| YPL024W                                          | RMI1          | YHR013C                 | ARD1          |
| YKL110C                                          | KTI12         | YGL163C                 | RAD54         |
| YJR033C                                          | RAV1          | YNR032W                 | PPG1          |
| YJL036W                                          | SNX4          | YGL115W                 | SNF4          |
| YOR308C                                          | SNU66         | YAL002W                 | VPS8          |
| YDR318W                                          | MCM21         | YDL047W                 | SIT4          |
| YCR024C-A                                        | PMP1          | YER110C                 | KAP123        |
| YGL025C                                          | PGD1          | YBL025W                 | RRN10         |
| YOL111C                                          | MDY2          | YCR053W                 | THR4          |
| YJL095W                                          | BCK1          | YBR181C                 | RPS6B         |

| Predictions at threshold level 0.80 continued... |               |                         |               |
|--------------------------------------------------|---------------|-------------------------|---------------|
| Gene1 of predicted pair                          |               | Gene2 of predicted pair |               |
| Systematic Name                                  | Standard Name | Systematic Name         | Standard Name |
| YJL060W                                          | BNA3          | YMR055C                 | BUB2          |
| YBL058W                                          | SHP1          | YFR036W                 | CDC26         |
| YHL031C                                          | GOS1          | YDR363W-A               | SEM1          |
| YNL087W                                          | TCB2          | YDR484W                 | VPS52         |
| YIL156W                                          | UBP7          | YMR109W                 | MYO5          |
| YPL024W                                          | RMI1          | YDL223C                 | HBT1          |
| YNL032W                                          | SIW14         | YNL058C                 | YNL058C       |
| YPL105C                                          | YPL105C       | YOL018C                 | TLG2          |
| YLR337C                                          | VRP1          | YDL002C                 | NHP10         |
| YJL183W                                          | MNN11         | YBR114W                 | RAD16         |
| YNL291C                                          | MID1          | YJR040W                 | GEF1          |
| YDR477W                                          | SNF1          | YHR081W                 | LRP1          |
| YLR360W                                          | VPS38         | YNL127W                 | FAR11         |
| YBL067C                                          | UBP13         | YLR370C                 | ARC18         |
| YHR111W                                          | UBA4          | YCR086W                 | CSM1          |
| YNL307C                                          | MCK1          | YER139C                 | YER139C       |
| YIL053W                                          | RHR2          | YFR036W                 | CDC26         |
| YJR040W                                          | GEF1          | YJR060W                 | CBF1          |
| YMR116C                                          | ASC1          | YDL013W                 | SLX5          |
| YOR275C                                          | RIM20         | YNL079C                 | TPM1          |
| YOR066W                                          | MSA1          | YLR370C                 | ARC18         |
| YIL148W                                          | RPL40A        | YFL047W                 | RGD2          |
| YJR052W                                          | RAD7          | YER162C                 | RAD4          |
| YBR030W                                          | YBR030W       | YMR142C                 | RPL13B        |
| YOR080W                                          | DIA2          | YJR035W                 | RAD26         |
| YPR120C                                          | CLB5          | YPR046W                 | MCM16         |
| YDL101C                                          | DUN1          | YLR410W                 | VIP1          |
| YGL060W                                          | YBP2          | YDR318W                 | MCM21         |
| YJR140C                                          | HIR3          | YLR320W                 | MMS22         |

| Predictions at threshold level 0.80 continued... |               |                         |               |
|--------------------------------------------------|---------------|-------------------------|---------------|
| Gene1 of predicted pair                          |               | Gene2 of predicted pair |               |
| Systematic Name                                  | Standard Name | Systematic Name         | Standard Name |
| YPR120C                                          | CLB5          | YFR030W                 | MET10         |
| YMR202W                                          | ERG2          | YPR040W                 | TIP41         |
| YFR032C-A                                        | RPL29         | YGR135W                 | PRE9          |
| YAL024C                                          | LTE1          | YNL116W                 | DMA2          |
| YFL023W                                          | BUD27         | YGL163C                 | RAD54         |
| YML117W                                          | NAB6          | YKR020W                 | VPS51         |
| YFR031C-A                                        | RPL2A         | YIL159W                 | BNR1          |
| YHR081W                                          | LRP1          | YOR327C                 | SNC2          |
| YDR310C                                          | SUM1          | YDR207C                 | UME6          |
| YOR337W                                          | TEA1          | YDR358W                 | GGA1          |
| YEL056W                                          | HAT2          | YJL190C                 | RPS22A        |
| YGR108W                                          | CLB1          | YPR120C                 | CLB5          |
| YNL325C                                          | FIG4          | YNL032W                 | SIW14         |
| YOR109W                                          | INP53         | YML001W                 | YPT7          |
| YIL034C                                          | CAP2          | YLR381W                 | CTF3          |
| YLR234W                                          | TOP3          | YLR435W                 | TSR2          |
| YDR009W                                          | GAL3          | YPL248C                 | GAL4          |
| YNL206C                                          | RTT106        | YLR452C                 | SST2          |
| YDL190C                                          | UFD2          | YDR363W-A               | SEM1          |
| YGL237C                                          | HAP2          | YHR111W                 | UBA4          |
| YIL159W                                          | BNR1          | YDL223C                 | HBT1          |
| YPR036W                                          | VMA13         | YER040W                 | GLN3          |
| YMR142C                                          | RPL13B        | YNL087W                 | TCB2          |
| YMR152W                                          | YIM1          | YDL192W                 | ARF1          |
| YIL053W                                          | RHR2          | YMR152W                 | YIM1          |
| YNR052C                                          | POP2          | YGL252C                 | RTG2          |
| YOR337W                                          | TEA1          | YBL025W                 | RRN10         |
| YLR090W                                          | XDJ1          | YGL124C                 | MON1          |
| YOR033C                                          | EXO1          | YBL079W                 | NUP170        |



| Predictions at threshold level 0.80 continued... |               |                         |               |
|--------------------------------------------------|---------------|-------------------------|---------------|
| Gene1 of predicted pair                          |               | Gene2 of predicted pair |               |
| Systematic Name                                  | Standard Name | Systematic Name         | Standard Name |
| YKL116C                                          | PRR1          | YKR099W                 | BAS1          |
| YHR081W                                          | LRP1          | YDL077C                 | VAM6          |
| YGL147C                                          | RPL9A         | YMR224C                 | MRE11         |
| YPR036W                                          | VMA13         | YLR370C                 | ARC18         |
| YGR270W                                          | YTA7          | YER122C                 | GLO3          |
| YOR106W                                          | VAM3          | YPL057C                 | SUR1          |
| YLR386W                                          | VAC14         | YDR183W                 | PLP1          |
| YER110C                                          | KAP123        | YMR273C                 | ZDS1          |
| YNL291C                                          | MID1          | YDL013W                 | SLX5          |
| YIR005W                                          | IST3          | YLR254C                 | NDL1          |
| YHR060W                                          | VMA22         | YJR060W                 | CBF1          |
| YGR261C                                          | APL6          | YPR032W                 | SRO7          |
| YGR104C                                          | SRB5          | YBR010W                 | HHT1          |
| YDR004W                                          | RAD57         | YPL253C                 | VIK1          |
| YLR292C                                          | SEC72         | YHR012W                 | VPS29         |
| YLR360W                                          | VPS38         | YKR001C                 | VPS1          |
| YBR215W                                          | HPC2          | YDR310C                 | SUM1          |
| YNR052C                                          | POP2          | YGL163C                 | RAD54         |
| YEL065W                                          | SIT1          | YBR019C                 | GAL10         |
| YOR195W                                          | SLK19         | YJL124C                 | LSM1          |
| YBR108W                                          | YBR108W       | YDR289C                 | RTT103        |
| YDR202C                                          | RAV2          | YEL051W                 | VMA8          |
| YJL124C                                          | LSM1          | YNL248C                 | RPA49         |
| YFR031C-A                                        | RPL2A         | YBR030W                 | YBR030W       |
| YDL047W                                          | SIT4          | YNL051W                 | COG5          |
| YDR129C                                          | SAC6          | YLR396C                 | VPS33         |
| YBR173C                                          | UMP1          | YMR198W                 | CIK1          |
| YLR360W                                          | VPS38         | YOL108C                 | INO4          |
| YML016C                                          | PPZ1          | YHR158C                 | KEL1          |

| Predictions at threshold level 0.80 continued... |               |                         |               |
|--------------------------------------------------|---------------|-------------------------|---------------|
| Gene1 of predicted pair                          |               | Gene2 of predicted pair |               |
| Systematic Name                                  | Standard Name | Systematic Name         | Standard Name |
| YGL175C                                          | SAE2          | YPL256C                 | CLN2          |
| YIL034C                                          | CAP2          | YBR107C                 | IML3          |
| YKR059W                                          | TIF1          | YJR032W                 | CPR7          |
| YJL172W                                          | CPS1          | YBR036C                 | CSG2          |
| YDR358W                                          | GGA1          | YAL030W                 | SNC1          |
| YIL053W                                          | RHR2          | YJL183W                 | MNN11         |
| YFR010W                                          | UBP6          | YFL023W                 | BUD27         |
| YJR060W                                          | CBF1          | YOL054W                 | PSH1          |
| YFL004W                                          | VTC2          | YER072W                 | VTC1          |
| YBL016W                                          | FUS3          | YJL157C                 | FAR1          |
| YDL006W                                          | PTC1          | YOR327C                 | SNC2          |
| YNL199C                                          | GCR2          | YLR182W                 | SWI6          |
| YER110C                                          | KAP123        | YMR109W                 | MYO5          |
| YPL240C                                          | HSP82         | YIL033C                 | BCY1          |
| YLR288C                                          | MEC3          | YOR043W                 | WHI2          |
| YCR086W                                          | CSM1          | YOL067C                 | RTG1          |
| YDR137W                                          | RGP1          | YPR046W                 | MCM16         |
| YOR109W                                          | INP53         | YOR035C                 | SHE4          |
| YPR036W                                          | VMA13         | YER072W                 | VTC1          |
| YBL008W                                          | HIR1          | YBR195C                 | MSI1          |
| YJL124C                                          | LSM1          | YGL148W                 | ARO2          |
| YMR224C                                          | MRE11         | YOR141C                 | ARP8          |
| YNL199C                                          | GCR2          | YAL002W                 | VPS8          |
| YBR173C                                          | UMP1          | YBR036C                 | CSG2          |
| YNL229C                                          | URE2          | YGR135W                 | PRE9          |
| YHR056C                                          | RSC30         | YKL114C                 | APN1          |
| YMR055C                                          | BUB2          | YOR141C                 | ARP8          |
| YGR133W                                          | PEX4          | YBR082C                 | UBC4          |
| YFL033C                                          | RIM15         | YNL127W                 | FAR11         |

| Predictions at threshold level 0.80 continued... |               |                         |               |
|--------------------------------------------------|---------------|-------------------------|---------------|
| Gene1 of predicted pair                          |               | Gene2 of predicted pair |               |
| Systematic Name                                  | Standard Name | Systematic Name         | Standard Name |
| YDL155W                                          | CLB3          | YDR076W                 | RAD55         |
| YLR315W                                          | NKP2          | YLR182W                 | SWI6          |
| YIL053W                                          | RHR2          | YOR327C                 | SNC2          |
| YDR335W                                          | MSN5          | YIR005W                 | IST3          |
| YML115C                                          | VAN1          | YHR060W                 | VMA22         |
| YMR216C                                          | SKY1          | YNL297C                 | MON2          |
| YDR318W                                          | MCM21         | YML112W                 | CTK3          |
| YGL115W                                          | SNF4          | YKR030W                 | GMH1          |
| YML117W                                          | NAB6          | YMR116C                 | ASC1          |
| YIL008W                                          | URM1          | YPR046W                 | MCM16         |
| YDR320C                                          | SWA2          | YNL297C                 | MON2          |
| YCR020C-A                                        | MAK31         | YPR017C                 | DSS4          |
| YDR202C                                          | RAV2          | YOR327C                 | SNC2          |
| YJR140C                                          | HIR3          | YER139C                 | YER139C       |
| YKL048C                                          | ELM1          | YLR093C                 | NYV1          |
| YKR057W                                          | RPS21A        | YKL101W                 | HSL1          |
| YML058W                                          | SML1          | YPL022W                 | RAD1          |
| YIL045W                                          | PIG2          | YLR258W                 | GSY2          |
| YOR038C                                          | HIR2          | YOR124C                 | UBP2          |
| YBL101C                                          | ECM21         | YBR082C                 | UBC4          |
| YFR031C-A                                        | RPL2A         | YNL087W                 | TCB2          |
| YDR004W                                          | RAD57         | YBR057C                 | MUM2          |
| YBL103C                                          | RTG3          | YJR032W                 | CPR7          |
| YGL033W                                          | HOP2          | YMR016C                 | SOK2          |
| YKL110C                                          | KTI12         | YNL116W                 | DMA2          |
| YMR152W                                          | YIM1          | YGL003C                 | CDH1          |
| YLR315W                                          | NKP2          | YOR038C                 | HIR2          |
| YDR174W                                          | HMO1          | YDR156W                 | RPA14         |
| YPR046W                                          | MCM16         | YLR093C                 | NYV1          |

| Predictions at threshold level 0.80 continued... |               |                         |               |
|--------------------------------------------------|---------------|-------------------------|---------------|
| Gene1 of predicted pair                          |               | Gene2 of predicted pair |               |
| Systematic Name                                  | Standard Name | Systematic Name         | Standard Name |
| YML115C                                          | VAN1          | YLR441C                 | RPS1A         |
| YOR132W                                          | VPS17         | YER162C                 | RAD4          |
| YFR036W                                          | CDC26         | YOR141C                 | ARP8          |
| YER044C                                          | ERG28         | YFR036W                 | CDC26         |
| YNL025C                                          | SSN8          | YNR052C                 | POP2          |
| YDL083C                                          | RPS16B        | YGL003C                 | CDH1          |
| YMR127C                                          | SAS2          | YGL124C                 | MON1          |
| YNL069C                                          | RPL16B        | YDR153C                 | ENT5          |
| YLR095C                                          | IOC2          | YFR010W                 | UBP6          |
| YDL020C                                          | RPN4          | YLR135W                 | SLX4          |
| YFR031C-A                                        | RPL2A         | YOL111C                 | MDY2          |
| YOR327C                                          | SNC2          | YNL051W                 | COG5          |
| YDR176W                                          | NGG1          | YDR448W                 | ADA2          |
| YMR054W                                          | STV1          | YKL080W                 | VMA5          |
| YPR018W                                          | RLF2          | YPR046W                 | MCM16         |
| YDR071C                                          | PAA1          | YNL030W                 | HHF2          |
| YNL094W                                          | APP1          | YMR109W                 | MYO5          |
| YFL023W                                          | BUD27         | YDR358W                 | GGA1          |
| YAL024C                                          | LTE1          | YML115C                 | VAN1          |
| YCR077C                                          | PAT1          | YPR119W                 | CLB2          |
| YDR174W                                          | HMO1          | YJL006C                 | CTK2          |
| YDL020C                                          | RPN4          | YPR120C                 | CLB5          |
| YPR046W                                          | MCM16         | YKL101W                 | HSL1          |
| YNL068C                                          | FKH2          | YHR200W                 | RPN10         |
| YOR080W                                          | DIA2          | YLR058C                 | SHM2          |
| YBL058W                                          | SHP1          | YML071C                 | COG8          |
| YMR142C                                          | RPL13B        | YGL212W                 | VAM7          |
| YEL050C                                          | RML2          | YLR079W                 | SIC1          |
| YOR066W                                          | MSA1          | YER139C                 | YER139C       |

| Predictions at threshold level 0.80 continued... |               |                         |               |
|--------------------------------------------------|---------------|-------------------------|---------------|
| Gene1 of predicted pair                          |               | Gene2 of predicted pair |               |
| Systematic Name                                  | Standard Name | Systematic Name         | Standard Name |
| YBR200W                                          | BEM1          | YOL054W                 | PSH1          |
| YJR060W                                          | CBF1          | YLR182W                 | SWI6          |
| YNL238W                                          | KEX2          | YLR309C                 | IMH1          |
| YLL007C                                          | YLL007C       | YIL008W                 | URM1          |
| YDR320C                                          | SWA2          | YOR069W                 | VPS5          |
| YMR039C                                          | SUB1          | YNL147W                 | LSM7          |
| YFL033C                                          | RIM15         | YDR207C                 | UME6          |
| YBR031W                                          | RPL4A         | YBL072C                 | RPS8A         |
| YFR031C-A                                        | RPL2A         | YLR452C                 | SST2          |
| YKR099W                                          | BAS1          | YKR035W-A               | DID2          |
| YDR174W                                          | HMO1          | YML112W                 | CTK3          |
| YKL116C                                          | PRR1          | YNL041C                 | COG6          |
| YKL126W                                          | YPK1          | YER139C                 | YER139C       |
| YIL053W                                          | RHR2          | YNL238W                 | KEX2          |
| YMR054W                                          | STV1          | YNL107W                 | YAF9          |
| YFL023W                                          | BUD27         | YPL195W                 | APL5          |
| YMR095C                                          | SNO1          | YMR142C                 | RPL13B        |
| YDR156W                                          | RPA14         | YLR254C                 | NDL1          |
| YNL069C                                          | RPL16B        | YNL051W                 | COG5          |
| YOR132W                                          | VPS17         | YHR178W                 | STB5          |
| YNL238W                                          | KEX2          | YDR310C                 | SUM1          |
| YOR275C                                          | RIM20         | YPL158C                 | YPL158C       |
| YMR109W                                          | MYO5          | YMR055C                 | BUB2          |
| YOR127W                                          | RGA1          | YHR115C                 | DMA1          |
| YDR363W-A                                        | SEM1          | YKR001C                 | VPS1          |
| YJR005W                                          | APL1          | YDR318W                 | MCM21         |
| YBR200W                                          | BEM1          | YOL111C                 | MDY2          |
| YBR057C                                          | MUM2          | YDR076W                 | RAD55         |
| YGR081C                                          | SLX9          | YMR231W                 | PEP5          |

| Predictions at threshold level 0.80 continued... |               |                         |               |
|--------------------------------------------------|---------------|-------------------------|---------------|
| Gene1 of predicted pair                          |               | Gene2 of predicted pair |               |
| Systematic Name                                  | Standard Name | Systematic Name         | Standard Name |
| YGR072W                                          | UPF3          | YEL053C                 | MAK10         |
| YLR320W                                          | MMS22         | YBL025W                 | RRN10         |
| YHR060W                                          | VMA22         | YOR327C                 | SNC2          |
| YIL159W                                          | BNR1          | YNL238W                 | KEX2          |
| YPL037C                                          | EGD1          | YDR207C                 | UME6          |
| YFL023W                                          | BUD27         | YKR099W                 | BAS1          |
| YCR081W                                          | SRB8          | YMR199W                 | CLN1          |
| YMR202W                                          | ERG2          | YJR035W                 | RAD26         |
| YMR133W                                          | REC114        | YFR036W                 | CDC26         |
| YDL116W                                          | NUP84         | YLR288C                 | MEC3          |
| YDL185W                                          | TFP1          | YGR105W                 | VMA21         |
| YJR060W                                          | CBF1          | YNL116W                 | DMA2          |
| YNL201C                                          | PSY2          | YNR052C                 | POP2          |
| YLR447C                                          | VMA6          | YKR001C                 | VPS1          |
| YNL054W                                          | VAC7          | YKR061W                 | KTR2          |
| YDR320C                                          | SWA2          | YML001W                 | YPT7          |
| YBR173C                                          | UMP1          | YHR060W                 | VMA22         |
| YLR093C                                          | NYV1          | YMR230W                 | RPS10B        |
| YER116C                                          | SLX8          | YGL124C                 | MON1          |
| YHR178W                                          | STB5          | YOR213C                 | SAS5          |
| YDL155W                                          | CLB3          | YCR086W                 | CSM1          |
| YLR090W                                          | XDJ1          | YGL003C                 | CDH1          |
| YKL101W                                          | HSL1          | YJL095W                 | BCK1          |
| YLR377C                                          | FBP1          | YOL126C                 | MDH2          |
| YFR010W                                          | UBP6          | YNL076W                 | MKS1          |
| YDR254W                                          | CHL4          | YKL110C                 | KTI12         |
| YJL124C                                          | LSM1          | YMR055C                 | BUB2          |
| YPL050C                                          | MNN9          | YBL047C                 | EDE1          |
| YBR200W                                          | BEM1          | YJR056C                 | YJR056C       |

| Predictions at threshold level 0.80 continued... |               |                         |               |
|--------------------------------------------------|---------------|-------------------------|---------------|
| Gene1 of predicted pair                          |               | Gene2 of predicted pair |               |
| Systematic Name                                  | Standard Name | Systematic Name         | Standard Name |
| YLL007C                                          | YLL007C       | YPR046W                 | MCM16         |
| YMR142C                                          | RPL13B        | YKR099W                 | BAS1          |
| YIL053W                                          | RHR2          | YEL053C                 | MAK10         |
| YKR072C                                          | SIS2          | YLR288C                 | MEC3          |
| YDR479C                                          | PEX29         | YLR324W                 | PEX30         |
| YKR048C                                          | NAP1          | YOR208W                 | PTP2          |
| YGL223C                                          | COG1          | YOR109W                 | INP53         |
| YKR035W-A                                        | DID2          | YDL192W                 | ARF1          |
| YHL031C                                          | GOS1          | YGL054C                 | ERV14         |
| YLR292C                                          | SEC72         | YHR111W                 | UBA4          |
| YIL159W                                          | BNR1          | YLR452C                 | SST2          |
| YDL116W                                          | NUP84         | YMR055C                 | BUB2          |
| YDL002C                                          | NHP10         | YBR036C                 | CSG2          |
| YCR066W                                          | RAD18         | YPL195W                 | APL5          |
| YJL065C                                          | DLS1          | YOR304W                 | ISW2          |
| YLR360W                                          | VPS38         | YJR033C                 | RAV1          |
| YNL307C                                          | MCK1          | YHR081W                 | LRP1          |
| YKR101W                                          | SIR1          | YLR399C                 | BDF1          |
| YKR057W                                          | RPS21A        | YBR084C-A               | RPL19A        |
| YJR059W                                          | PTK2          | YPL246C                 | RBD2          |
| YNL307C                                          | MCK1          | YJR032W                 | CPR7          |
| YIL076W                                          | SEC28         | YPL037C                 | EGD1          |
| YJR024C                                          | MDE1          | YKR024C                 | DBP7          |
| YGR184C                                          | UBR1          | YHR052W                 | CIC1          |
| YNL288W                                          | CAF40         | YGR188C                 | BUB1          |
| YGL212W                                          | VAM7          | YAL002W                 | VPS8          |
| YER001W                                          | MNN1          | YGL212W                 | VAM7          |
| YDR245W                                          | MNN10         | YDR363W-A               | SEM1          |
| YOR270C                                          | VPH1          | YOL121C                 | RPS19A        |

| Predictions at threshold level 0.80 continued... |               |                         |               |
|--------------------------------------------------|---------------|-------------------------|---------------|
| Gene1 of predicted pair                          |               | Gene2 of predicted pair |               |
| Systematic Name                                  | Standard Name | Systematic Name         | Standard Name |
| YFR031C-A                                        | RPL2A         | YPL057C                 | SUR1          |
| YJL172W                                          | CPS1          | YJR084W                 | CSN12         |
| YHR178W                                          | STB5          | YDR183W                 | PLP1          |
| YER096W                                          | SHC1          | YCR077C                 | PAT1          |
| YDR477W                                          | SNF1          | YNL058C                 | YNL058C       |
| YNL243W                                          | SLA2          | YDR358W                 | GGA1          |
| YML103C                                          | NUP188        | YER115C                 | SPR6          |
| YPL253C                                          | VIK1          | YPL256C                 | CLN2          |
| YPL195W                                          | APL5          | YDR310C                 | SUM1          |
| YPL024W                                          | RMI1          | YPL022W                 | RAD1          |
| YLR320W                                          | MMS22         | YBR082C                 | UBC4          |
| YNL291C                                          | MID1          | YEL051W                 | VMA8          |
| YLR418C                                          | CDC73         | YGL094C                 | PAN2          |
| YGR108W                                          | CLB1          | YHR178W                 | STB5          |
| YPL105C                                          | YPL105C       | YHR012W                 | VPS29         |
| YDL006W                                          | PTC1          | YOR035C                 | SHE4          |
| YPR051W                                          | MAK3          | YLR447C                 | VMA6          |
| YKR099W                                          | BAS1          | YCR053W                 | THR4          |
| YLR386W                                          | VAC14         | YDL077C                 | VAM6          |
| YDR108W                                          | GSG1          | YPL120W                 | VPS30         |
| YDR174W                                          | HMO1          | YNR052C                 | POP2          |
| YMR133W                                          | REC114        | YER139C                 | YER139C       |
| YDR174W                                          | HMO1          | YHR115C                 | DMA1          |
| YDR004W                                          | RAD57         | YPR120C                 | CLB5          |
| YER115C                                          | SPR6          | YGL016W                 | KAP122        |
| YFL013C                                          | IES1          | YLR350W                 | ORM2          |
| YFL023W                                          | BUD27         | YBL025W                 | RRN10         |
| YLR410W                                          | VIP1          | YLR254C                 | NDL1          |
| YBR030W                                          | YBR030W       | YKR099W                 | BAS1          |



| Predictions at threshold level 0.80 continued... |               |                         |               |
|--------------------------------------------------|---------------|-------------------------|---------------|
| Gene1 of predicted pair                          |               | Gene2 of predicted pair |               |
| Systematic Name                                  | Standard Name | Systematic Name         | Standard Name |
| YJR060W                                          | CBF1          | YLR315W                 | NKP2          |
| YLR234W                                          | TOP3          | YMR109W                 | MYO5          |
| YFR031C-A                                        | RPL2A         | YPL037C                 | EGD1          |
| YOR023C                                          | AHC1          | YDR254W                 | CHL4          |
| YKL117W                                          | SBA1          | YMR273C                 | ZDS1          |
| YDR101C                                          | ARX1          | YIL133C                 | RPL16A        |
| YBR280C                                          | SAF1          | YER122C                 | GLO3          |
| YDL101C                                          | DUN1          | YBL079W                 | NUP170        |
| YDR383C                                          | NKP1          | YNL054W                 | VAC7          |
| YEL065W                                          | SIT1          | YBL058W                 | SHP1          |
| YDR144C                                          | MKC7          | YJL183W                 | MNN11         |
| YER087C-B                                        | SBH1          | YPR028W                 | YOP1          |
| YNL087W                                          | TCB2          | YLR320W                 | MMS22         |
| YJL124C                                          | LSM1          | YGL252C                 | RTG2          |
| YIL053W                                          | RHR2          | YDR207C                 | UME6          |
| YGL033W                                          | HOP2          | YOR270C                 | VPH1          |
| YCR081W                                          | SRB8          | YHR205W                 | SCH9          |
| YNL307C                                          | MCK1          | YNL238W                 | KEX2          |
| YCR020C-A                                        | MAK31         | YOL018C                 | TLG2          |
| YDR448W                                          | ADA2          | YGL066W                 | SGF73         |
| YLR079W                                          | SIC1          | YIL036W                 | CST6          |
| YER122C                                          | GLO3          | YOL081W                 | IRA2          |
| YOR001W                                          | RRP6          | YNL199C                 | GCR2          |
| YDR363W-A                                        | SEM1          | YKL160W                 | ELF1          |
| YFR036W                                          | CDC26         | YLR254C                 | NDL1          |
| YGL087C                                          | MMS2          | YJL183W                 | MNN11         |
| YJL036W                                          | SNX4          | YHR060W                 | VMA22         |
| YGL054C                                          | ERV14         | YDR153C                 | ENT5          |
| YPR120C                                          | CLB5          | YNL116W                 | DMA2          |

| Predictions at threshold level 0.80 continued... |               |                         |               |
|--------------------------------------------------|---------------|-------------------------|---------------|
| Gene1 of predicted pair                          |               | Gene2 of predicted pair |               |
| Systematic Name                                  | Standard Name | Systematic Name         | Standard Name |
| YDR358W                                          | GGA1          | YCR053W                 | THR4          |
| YKR001C                                          | VPS1          | YDR207C                 | UME6          |
| YIL159W                                          | BNR1          | YMR095C                 | SNO1          |
| YJL190C                                          | RPS22A        | YNL107W                 | YAF9          |
| YBR200W                                          | BEM1          | YDL155W                 | CLB3          |
| YDR108W                                          | GSG1          | YER122C                 | GLO3          |
| YNL069C                                          | RPL16B        | YDR080W                 | VPS41         |
| YPL137C                                          | GIP3          | YJR084W                 | CSN12         |
| YDL116W                                          | NUP84         | YML095C                 | RAD10         |
| YKL139W                                          | CTK1          | YLR441C                 | RPS1A         |
| YGR104C                                          | SRB5          | YHR200W                 | RPN10         |
| YMR016C                                          | SOK2          | YPL137C                 | GIP3          |
| YKL110C                                          | KTI12         | YNL225C                 | CNM67         |
| YML001W                                          | YPT7          | YJR032W                 | CPR7          |
| YDL185W                                          | TFP1          | YJL006C                 | CTK2          |
| YNL107W                                          | YAF9          | YGL252C                 | RTG2          |
| YDR183W                                          | PLP1          | YJL183W                 | MNN11         |
| YGR261C                                          | APL6          | YNL127W                 | FAR11         |
| YPL057C                                          | SUR1          | YDR378C                 | LSM6          |
| YJL183W                                          | MNN11         | YML097C                 | VPS9          |
| YGL178W                                          | MPT5          | YDL225W                 | SHS1          |
| YHR111W                                          | UBA4          | YGR135W                 | PRE9          |
| YBL079W                                          | NUP170        | YPL256C                 | CLN2          |
| YOR043W                                          | WHI2          | YLR371W                 | ROM2          |
| YNL106C                                          | INP52         | YIL103W                 | DPH1          |
| YER068W                                          | MOT2          | YJL140W                 | RPB4          |
| YKL135C                                          | APL2          | YDL192W                 | ARF1          |
| YPL037C                                          | EGD1          | YDR358W                 | GGA1          |
| YOR127W                                          | RGA1          | YAR014C                 | BUD14         |

| Predictions at threshold level 0.80 continued... |               |                         |               |
|--------------------------------------------------|---------------|-------------------------|---------------|
| Gene1 of predicted pair                          |               | Gene2 of predicted pair |               |
| Systematic Name                                  | Standard Name | Systematic Name         | Standard Name |
| YLR094C                                          | GIS3          | YGL124C                 | MON1          |
| YGL003C                                          | CDH1          | YPL195W                 | APL5          |
| YEL044W                                          | IES6          | YLR370C                 | ARC18         |
| YDR358W                                          | GGA1          | YLR131C                 | ACE2          |
| YPL115C                                          | BEM3          | YOL067C                 | RTG1          |
| YAL024C                                          | LTE1          | YDR309C                 | GIC2          |
| YIL076W                                          | SEC28         | YKL213C                 | DOA1          |
| YOR195W                                          | SLK19         | YDR379W                 | RGA2          |
| YNL016W                                          | PUB1          | YOL090W                 | MSH2          |
| YPR167C                                          | MET16         | YER042W                 | MXR1          |
| YPR018W                                          | RLF2          | YER116C                 | SLX8          |
| YDR320C                                          | SWA2          | YOR112W                 | CEX1          |
| YPR131C                                          | NAT3          | YPR046W                 | MCM16         |
| YDR080W                                          | VPS41         | YLR309C                 | IMH1          |
| YBR173C                                          | UMP1          | YBL019W                 | APN2          |
| YPR018W                                          | RLF2          | YDR076W                 | RAD55         |
| YGL087C                                          | MMS2          | YDR092W                 | UBC13         |
| YDR254W                                          | CHL4          | YGL252C                 | RTG2          |
| YEL060C                                          | PRB1          | YMR214W                 | SCJ1          |
| YNL201C                                          | PSY2          | YGR188C                 | BUB1          |
| YDR507C                                          | GIN4          | YKR020W                 | VPS51         |
| YDL059C                                          | RAD59         | YOR014W                 | RTS1          |
| YJL060W                                          | BNA3          | YDR318W                 | MCM21         |
| YJR056C                                          | YJR056C       | YBL025W                 | RRN10         |
| YLR441C                                          | RPS1A         | YHR203C                 | RPS4B         |
| YGR249W                                          | MGA1          | YIL076W                 | SEC28         |
| YOR270C                                          | VPH1          | YBR200W                 | BEM1          |
| YGL200C                                          | EMP24         | YFR036W                 | CDC26         |
| YKR061W                                          | KTR2          | YGR270W                 | YTA7          |

| Predictions at threshold level 0.80 continued... |               |                         |               |
|--------------------------------------------------|---------------|-------------------------|---------------|
| Gene1 of predicted pair                          |               | Gene2 of predicted pair |               |
| Systematic Name                                  | Standard Name | Systematic Name         | Standard Name |
| YML103C                                          | NUP188        | YLR254C                 | NDL1          |
| YPL105C                                          | YPL105C       | YDL077C                 | VAM6          |
| YOL030W                                          | GAS5          | YDR207C                 | UME6          |
| YOR270C                                          | VPH1          | YHR039C-A               | VMA10         |
| YBL102W                                          | SFT2          | YAR014C                 | BUD14         |
| YOR140W                                          | SFL1          | YDR245W                 | MNN10         |
| YBR057C                                          | MUM2          | YNL329C                 | PEX6          |
| YDR202C                                          | RAV2          | YLR309C                 | IMH1          |
| YGR249W                                          | MGA1          | YGL115W                 | SNF4          |
| YML103C                                          | NUP188        | YDR335W                 | MSN5          |
| YDR289C                                          | RTT103        | YNL107W                 | YAF9          |
| YKR061W                                          | KTR2          | YNL225C                 | CNM67         |
| YML103C                                          | NUP188        | YNL307C                 | MCK1          |
| YDR335W                                          | MSN5          | YOR038C                 | HIR2          |
| YKR001C                                          | VPS1          | YPL120W                 | VPS30         |
| YMR127C                                          | SAS2          | YPL018W                 | CTF19         |
| YFR031C-A                                        | RPL2A         | YMR153W                 | NUP53         |
| YLR386W                                          | VAC14         | YOR327C                 | SNC2          |
| YLR381W                                          | CTF3          | YAL002W                 | VPS8          |
| YMR273C                                          | ZDS1          | YBL079W                 | NUP170        |
| YIL156W                                          | UBP7          | YHR114W                 | BZZ1          |
| YNL032W                                          | SIW14         | YHR039C-A               | VMA10         |
| YJL151C                                          | SNA3          | YHR114W                 | BZZ1          |
| YKL048C                                          | ELM1          | YLR233C                 | EST1          |
| YKR059W                                          | TIF1          | YHR178W                 | STB5          |
| YDR144C                                          | MKC7          | YGR188C                 | BUB1          |
| YGL133W                                          | ITC1          | YPL161C                 | BEM4          |
| YGL212W                                          | VAM7          | YHL020C                 | OPI1          |
| YPR120C                                          | CLB5          | YJL006C                 | CTK2          |

| Predictions at threshold level 0.80 continued... |               |                         |               |
|--------------------------------------------------|---------------|-------------------------|---------------|
| Gene1 of predicted pair                          |               | Gene2 of predicted pair |               |
| Systematic Name                                  | Standard Name | Systematic Name         | Standard Name |
| YML103C                                          | NUP188        | YCR086W                 | CSM1          |
| YDL116W                                          | NUP84         | YDR383C                 | NKP1          |
| YML115C                                          | VAN1          | YER096W                 | SHC1          |
| YFR010W                                          | UBP6          | YBR057C                 | MUM2          |
| YOL126C                                          | MDH2          | YOR358W                 | HAP5          |
| YGL025C                                          | PGD1          | YHR039C-A               | VMA10         |
| YDR110W                                          | FOB1          | YHR152W                 | SPO12         |
| YGL212W                                          | VAM7          | YER120W                 | SCS2          |
| YJL004C                                          | SYS1          | YDL192W                 | ARF1          |
| YPL050C                                          | MNN9          | YFL048C                 | EMP47         |
| YLR452C                                          | SST2          | YBR036C                 | CSG2          |
| YFR031C-A                                        | RPL2A         | YMR311C                 | GLC8          |
| YIL053W                                          | RHR2          | YOR290C                 | SNF2          |
| YIR009W                                          | MSL1          | YMR055C                 | BUB2          |
| YBL058W                                          | SHP1          | YLR441C                 | RPS1A         |
| YDR363W-A                                        | SEM1          | YOL091W                 | SPO21         |
| YIL159W                                          | BNR1          | YOL111C                 | MDY2          |
| YOR270C                                          | VPH1          | YGL212W                 | VAM7          |
| YOR066W                                          | MSA1          | YML071C                 | COG8          |
| YER110C                                          | KAP123        | YNL199C                 | GCR2          |
| YNL297C                                          | MON2          | YML001W                 | YPT7          |
| YOR069W                                          | VPS5          | YJR058C                 | APS2          |
| YPL240C                                          | HSP82         | YHR079C-A               | SAE3          |
| YIL159W                                          | BNR1          | YHR060W                 | VMA22         |
| YDR456W                                          | NHX1          | YHR012W                 | VPS29         |
| YHR013C                                          | ARD1          | YNL116W                 | DMA2          |
| YGL212W                                          | VAM7          | YLR093C                 | NYV1          |
| YBR171W                                          | SEC66         | YLR370C                 | ARC18         |
| YPL253C                                          | VIK1          | YGL252C                 | RTG2          |

| Predictions at threshold level 0.80 continued... |               |                         |               |
|--------------------------------------------------|---------------|-------------------------|---------------|
| Gene1 of predicted pair                          |               | Gene2 of predicted pair |               |
| Systematic Name                                  | Standard Name | Systematic Name         | Standard Name |
| YNL307C                                          | MCK1          | YKL048C                 | ELM1          |
| YPL195W                                          | APL5          | YBL025W                 | RRN10         |
| YPR018W                                          | RLF2          | YMR055C                 | BUB2          |
| YBL051C                                          | PIN4          | YJL190C                 | RPS22A        |
| YGL153W                                          | PEX14         | YLR425W                 | TUS1          |
| YDR443C                                          | SSN2          | YNR052C                 | POP2          |
| YAL014C                                          | SYN8          | YGL212W                 | VAM7          |
| YNL291C                                          | MID1          | YOR069W                 | VPS5          |
| YDR477W                                          | SNF1          | YDR146C                 | SWI5          |
| YMR198W                                          | CIK1          | YJR084W                 | CSN12         |
| YHR061C                                          | GIC1          | YGR152C                 | RSR1          |
| YOR127W                                          | RGA1          | YPR032W                 | SRO7          |
| YDL020C                                          | RPN4          | YPL024W                 | RMI1          |
| YDL223C                                          | HBT1          | YPL137C                 | GIP3          |
| YPL115C                                          | BEM3          | YBR107C                 | IML3          |
| YLL007C                                          | YLL007C       | YCR086W                 | CSM1          |
| YHR013C                                          | ARD1          | YML097C                 | VPS9          |
| YNL041C                                          | COG6          | YEL051W                 | VMA8          |
| YOR275C                                          | RIM20         | YBL101C                 | ECM21         |
| YNR052C                                          | POP2          | YLR135W                 | SLX4          |
| YDR137W                                          | RGP1          | YKR001C                 | VPS1          |
| YOR033C                                          | EXO1          | YPR119W                 | CLB2          |
| YGR209C                                          | TRX2          | YIL008W                 | URM1          |
| YLR192C                                          | HCR1          | YER139C                 | YER139C       |
| YOR038C                                          | HIR2          | YHR167W                 | THP2          |
| YBR217W                                          | ATG12         | YDR358W                 | GGA1          |
| YLR079W                                          | SIC1          | YOL081W                 | IRA2          |
| YDR456W                                          | NHX1          | YMR311C                 | GLC8          |
| YJL006C                                          | CTK2          | YNL147W                 | LSM7          |

| Predictions at threshold level 0.80 continued... |               |                         |               |
|--------------------------------------------------|---------------|-------------------------|---------------|
| Gene1 of predicted pair                          |               | Gene2 of predicted pair |               |
| Systematic Name                                  | Standard Name | Systematic Name         | Standard Name |
| YDR216W                                          | ADR1          | YPL248C                 | GAL4          |
| YNL076W                                          | MKS1          | YDR207C                 | UME6          |
| YPL115C                                          | BEM3          | YDR310C                 | SUM1          |
| YGR249W                                          | MGA1          | YMR153W                 | NUP53         |
| YFR031C-A                                        | RPL2A         | YNL127W                 | FAR11         |
| YMR172W                                          | HOT1          | YJL190C                 | RPS22A        |
| YPL057C                                          | SUR1          | YNL041C                 | COG6          |
| YPR084W                                          | YPR084W       | YPL105C                 | YPL105C       |
| YJR135C                                          | MCM22         | YKL101W                 | HSL1          |
| YGL237C                                          | HAP2          | YDL155W                 | CLB3          |
| YKR035W-A                                        | DID2          | YGL003C                 | CDH1          |
| YIL034C                                          | CAP2          | YGL237C                 | HAP2          |
| YGL135W                                          | RPL1B         | YBL047C                 | EDE1          |
| YER143W                                          | DDI1          | YHR200W                 | RPN10         |
| YDR363W-A                                        | SEM1          | YDR289C                 | RTT103        |
| YMR231W                                          | PEP5          | YGL124C                 | MON1          |
| YBR195C                                          | MSI1          | YML102W                 | CAC2          |
| YKL126W                                          | YPK1          | YGL115W                 | SNF4          |
| YLR360W                                          | VPS38         | YGR133W                 | PEX4          |
| YDR484W                                          | VPS52         | YER139C                 | YER139C       |
| YGL212W                                          | VAM7          | YMR214W                 | SCJ1          |
| YPR084W                                          | YPR084W       | YKR030W                 | GMH1          |
| YGL115W                                          | SNF4          | YMR230W                 | RPS10B        |
| YBR200W                                          | BEM1          | YPL018W                 | CTF19         |
| YNL238W                                          | KEX2          | YGL124C                 | MON1          |
| YPR051W                                          | MAK3          | YEL043W                 | YEL043W       |
| YML071C                                          | COG8          | YNL127W                 | FAR11         |
| YDR202C                                          | RAV2          | YAR014C                 | BUD14         |
| YML103C                                          | NUP188        | YLR315W                 | NKP2          |

| Predictions at threshold level 0.80 continued... |               |                         |               |
|--------------------------------------------------|---------------|-------------------------|---------------|
| Gene1 of predicted pair                          |               | Gene2 of predicted pair |               |
| Systematic Name                                  | Standard Name | Systematic Name         | Standard Name |
| YAL024C                                          | LTE1          | YDR261C                 | EXG2          |
| YPL024W                                          | RMI1          | YNL041C                 | COG6          |
| YFR032C-A                                        | RPL29         | YML117W                 | NAB6          |
| YDR484W                                          | VPS52         | YKR099W                 | BAS1          |
| YJL095W                                          | BCK1          | YMR230W                 | RPS10B        |
| YIL159W                                          | BNR1          | YPR119W                 | CLB2          |
| YDR293C                                          | SSD1          | YBR108W                 | YBR108W       |
| YFR010W                                          | UBP6          | YPR030W                 | CSR2          |
| YNL041C                                          | COG6          | YLR370C                 | ARC18         |
| YLR313C                                          | SPH1          | YJL187C                 | SWE1          |
| YKL032C                                          | IXR1          | YPL256C                 | CLN2          |
| YPR030W                                          | CSR2          | YBR019C                 | GAL10         |
| YCR065W                                          | HCM1          | YDR171W                 | HSP42         |
| YPL158C                                          | YPL158C       | YHL011C                 | PRS3          |
| YBR217W                                          | ATG12         | YJR056C                 | YJR056C       |
| YGR086C                                          | PIL1          | YOL100W                 | PKH2          |
| YBR108W                                          | YBR108W       | YDL083C                 | RPS16B        |
| YDR127W                                          | ARO1          | YPR119W                 | CLB2          |
| YGL087C                                          | MMS2          | YOR014W                 | RTS1          |
| YNL032W                                          | SIW14         | YOR066W                 | MSA1          |
| YDR443C                                          | SSN2          | YLR371W                 | ROM2          |
| YMR016C                                          | SOK2          | YDR484W                 | VPS52         |
| YLR381W                                          | CTF3          | YMR127C                 | SAS2          |
| YER162C                                          | RAD4          | YAR014C                 | BUD14         |
| YHR178W                                          | STB5          | YGL124C                 | MON1          |
| YGL153W                                          | PEX14         | YPL213W                 | LEA1          |
| YOR080W                                          | DIA2          | YDL226C                 | GCS1          |
| YGR072W                                          | UPF3          | YJL004C                 | SYS1          |
| YPL024W                                          | RMI1          | YDL184C                 | RPL41A        |



| Predictions at threshold level 0.80 continued... |               |                         |               |
|--------------------------------------------------|---------------|-------------------------|---------------|
| Gene1 of predicted pair                          |               | Gene2 of predicted pair |               |
| Systematic Name                                  | Standard Name | Systematic Name         | Standard Name |
| YLR381W                                          | CTF3          | YHR013C                 | ARD1          |
| YDR080W                                          | VPS41         | YPL120W                 | VPS30         |
| YLR381W                                          | CTF3          | YGR270W                 | YTA7          |
| YLR399C                                          | BDF1          | YPR120C                 | CLB5          |
| YKL135C                                          | APL2          | YKR001C                 | VPS1          |
| YPR084W                                          | YPR084W       | YJL124C                 | LSM1          |
| YDR318W                                          | MCM21         | YLR233C                 | EST1          |
| YOR156C                                          | NFI1          | YGL003C                 | CDH1          |
| YGL054C                                          | ERV14         | YNR032W                 | PPG1          |
| YNR072W                                          | HXT17         | YGL003C                 | CDH1          |
| YEL009C                                          | GCN4          | YCL010C                 | SGF29         |
| YNL106C                                          | INP52         | YLR386W                 | VAC14         |
| YER115C                                          | SPR6          | YKL117W                 | SBA1          |
| YJR140C                                          | HIR3          | YLR315W                 | NKP2          |
| YKL116C                                          | PRR1          | YBR030W                 | YBR030W       |
| YLR090W                                          | XDJ1          | YOR270C                 | VPH1          |
| YBL047C                                          | EDE1          | YPL213W                 | LEA1          |
| YBL058W                                          | SHP1          | YLR180W                 | SAM1          |
| YPL241C                                          | CIN2          | YGL190C                 | CDC55         |
| YKR020W                                          | VPS51         | YOL081W                 | IRA2          |
| YJL058C                                          | BIT61         | YKL114C                 | APN1          |
| YPL246C                                          | RBD2          | YLR144C                 | ACF2          |
| YGL174W                                          | BUD13         | YMR038C                 | CCS1          |
| YDR293C                                          | SSD1          | YHR012W                 | VPS29         |
| YGL078C                                          | DBP3          | YEL053C                 | MAK10         |
| YDL020C                                          | RPN4          | YKL080W                 | VMA5          |
| YGL212W                                          | VAM7          | YOL018C                 | TLG2          |
| YDR245W                                          | MNN10         | YMR311C                 | GLC8          |
| YGL054C                                          | ERV14         | YPR032W                 | SRO7          |

| Predictions at threshold level 0.80 continued... |               |                         |               |
|--------------------------------------------------|---------------|-------------------------|---------------|
| Gene1 of predicted pair                          |               | Gene2 of predicted pair |               |
| Systematic Name                                  | Standard Name | Systematic Name         | Standard Name |
| YOR327C                                          | SNC2          | YLR398C                 | SKI2          |
| YMR216C                                          | SKY1          | YGL223C                 | COG1          |
| YKR014C                                          | YPT52         | YJR084W                 | CSN12         |
| YER110C                                          | KAP123        | YFL047W                 | RGD2          |
| YIL076W                                          | SEC28         | YGR105W                 | VMA21         |
| YHR084W                                          | STE12         | YDR480W                 | DIG2          |
| YNL297C                                          | MON2          | YER162C                 | RAD4          |
| YDR183W                                          | PLP1          | YOL054W                 | PSH1          |
| YMR055C                                          | BUB2          | YAR014C                 | BUD14         |
| YDL020C                                          | RPN4          | YCL037C                 | SRO9          |
| YGL003C                                          | CDH1          | YOL081W                 | IRA2          |
| YPR017C                                          | DSS4          | YMR004W                 | MVP1          |
| YDR439W                                          | LRS4          | YKL110C                 | KTI12         |
| YNL031C                                          | HHT2          | YKR048C                 | NAP1          |
| YMR216C                                          | SKY1          | YOR109W                 | INP53         |
| YIL076W                                          | SEC28         | YGL115W                 | SNF4          |
| YAL024C                                          | LTE1          | YDR484W                 | VPS52         |
| YOR332W                                          | VMA4          | YKL080W                 | VMA5          |
| YCR077C                                          | PAT1          | YPL256C                 | CLN2          |
| YNL025C                                          | SSN8          | YAL002W                 | VPS8          |
| YBL078C                                          | ATG8          | YOR327C                 | SNC2          |
| YKR099W                                          | BAS1          | YOL081W                 | IRA2          |
| YMR016C                                          | SOK2          | YOL121C                 | RPS19A        |
| YPL022W                                          | RAD1          | YBR200W                 | BEM1          |
| YHR060W                                          | VMA22         | YJR033C                 | RAV1          |
| YDL149W                                          | ATG9          | YJR025C                 | BNA1          |
| YOR368W                                          | RAD17         | YOL081W                 | IRA2          |
| YFR010W                                          | UBP6          | YLR150W                 | STM1          |
| YOR124C                                          | UBP2          | YMR038C                 | CCS1          |

| Predictions at threshold level 0.80 continued... |               |                         |               |
|--------------------------------------------------|---------------|-------------------------|---------------|
| Gene1 of predicted pair                          |               | Gene2 of predicted pair |               |
| Systematic Name                                  | Standard Name | Systematic Name         | Standard Name |
| YBL103C                                          | RTG3          | YHR200W                 | RPN10         |
| YDR264C                                          | AKR1          | YBL087C                 | RPL23A        |
| YDR363W-A                                        | SEM1          | YKR048C                 | NAP1          |
| YKL139W                                          | CTK1          | YOR327C                 | SNC2          |
| YCR063W                                          | BUD31         | YBR065C                 | ECM2          |
| YNL087W                                          | TCB2          | YLR398C                 | SKI2          |
| YFL023W                                          | BUD27         | YOR043W                 | WHI2          |
| YDL083C                                          | RPS16B        | YDR207C                 | UME6          |
| YLR018C                                          | POM34         | YGL200C                 | EMP24         |
| YLR119W                                          | SRN2          | YML001W                 | YPT7          |
| YOR109W                                          | INP53         | YML038C                 | YMD8          |
| YMR004W                                          | MVP1          | YGR105W                 | VMA21         |
| YHR039C-A                                        | VMA10         | YJR032W                 | CPR7          |
| YGR184C                                          | UBR1          | YPR046W                 | MCM16         |
| YJL187C                                          | SWE1          | YHR115C                 | DMA1          |
| YDR254W                                          | CHL4          | YDR144C                 | MKC7          |
| YBR171W                                          | SEC66         | YDR254W                 | CHL4          |
| YLR018C                                          | POM34         | YPL178W                 | CBC2          |
| YDR289C                                          | RTT103        | YJL183W                 | MNN11         |
| YLR399C                                          | BDF1          | YGR188C                 | BUB1          |
| YMR216C                                          | SKY1          | YDR207C                 | UME6          |
| YDL155W                                          | CLB3          | YGL003C                 | CDH1          |
| YNL044W                                          | YIP3          | YNL238W                 | KEX2          |
| YDR477W                                          | SNF1          | YPL161C                 | BEM4          |
| YIL036W                                          | CST6          | YOR141C                 | ARP8          |
| YGL153W                                          | PEX14         | YBL047C                 | EDE1          |
| YHL020C                                          | OPI1          | YNL107W                 | YAF9          |
| YPL161C                                          | BEM4          | YNL116W                 | DMA2          |
| YGL253W                                          | HXK2          | YBR114W                 | RAD16         |

| Predictions at threshold level 0.80 continued... |               |                         |               |
|--------------------------------------------------|---------------|-------------------------|---------------|
| Gene1 of predicted pair                          |               | Gene2 of predicted pair |               |
| Systematic Name                                  | Standard Name | Systematic Name         | Standard Name |
| YKL025C                                          | PAN3          | YML095C                 | RAD10         |
| YHR158C                                          | KEL1          | YLR425W                 | TUS1          |
| YLR386W                                          | VAC14         | YKR048C                 | NAP1          |
| YDR477W                                          | SNF1          | YKR099W                 | BAS1          |
| YMR153W                                          | NUP53         | YKR024C                 | DBP7          |
| YMR152W                                          | YIM1          | YMR214W                 | SCJ1          |
| YLR079W                                          | SIC1          | YJR135C                 | MCM22         |
| YKL139W                                          | CTK1          | YJL172W                 | CPS1          |
| YNR072W                                          | HXT17         | YER139C                 | YER139C       |
| YPL037C                                          | EGD1          | YHR200W                 | RPN10         |
| YNL291C                                          | MID1          | YPR032W                 | SRO7          |
| YDR378C                                          | LSM6          | YFR036W                 | CDC26         |
| YDR443C                                          | SSN2          | YIL038C                 | NOT3          |
| YAL024C                                          | LTE1          | YPL115C                 | BEM3          |
| YNL297C                                          | MON2          | YPL120W                 | VPS30         |
| YOR270C                                          | VPH1          | YER044C                 | ERG28         |
| YDR225W                                          | HTA1          | YGR252W                 | GCN5          |
| YPR051W                                          | MAK3          | YPL234C                 | TFP3          |
| YMR172W                                          | HOT1          | YPL018W                 | CTF19         |
| YOR327C                                          | SNC2          | YMR230W                 | RPS10B        |
| YJR060W                                          | CBF1          | YGL163C                 | RAD54         |
| YNL106C                                          | INP52         | YBR200W                 | BEM1          |
| YLR381W                                          | CTF3          | YLR399C                 | BDF1          |
| YGR108W                                          | CLB1          | YHR114W                 | BZZ1          |
| YKR020W                                          | VPS51         | YER162C                 | RAD4          |
| YIL076W                                          | SEC28         | YKR030W                 | GMH1          |
| YDR477W                                          | SNF1          | YMR199W                 | CLN1          |
| YHR178W                                          | STB5          | YDR318W                 | MCM21         |
| YLR102C                                          | APC9          | YKL101W                 | HSL1          |

| Predictions at threshold level 0.80 continued... |               |                         |               |
|--------------------------------------------------|---------------|-------------------------|---------------|
| Gene1 of predicted pair                          |               | Gene2 of predicted pair |               |
| Systematic Name                                  | Standard Name | Systematic Name         | Standard Name |
| YOR112W                                          | CEX1          | YHR060W                 | VMA22         |
| YPR017C                                          | DSS4          | YDR320C                 | SWA2          |
| YDR202C                                          | RAV2          | YER120W                 | SCS2          |
| YPL096C-A                                        | ERI1          | YBL047C                 | EDE1          |
| YBR171W                                          | SEC66         | YNL058C                 | YNL058C       |
| YKL139W                                          | CTK1          | YEL060C                 | PRB1          |
| YER075C                                          | PTP3          | YDL006W                 | PTC1          |
| YBR274W                                          | CHK1          | YGL148W                 | ARO2          |
| YPL050C                                          | MNN9          | YKL204W                 | EAP1          |
| YJL154C                                          | VPS35         | YMR199W                 | CLN1          |
| YDR335W                                          | MSN5          | YNL225C                 | CNM67         |
| YMR016C                                          | SOK2          | YHR081W                 | LRP1          |
| YEL053C                                          | MAK10         | YDR155C                 | CPR1          |
| YDR108W                                          | GSG1          | YJR032W                 | CPR7          |
| YJR090C                                          | GRR1          | YDR028C                 | REG1          |
| YJR060W                                          | CBF1          | YJL004C                 | SYS1          |
| YCR020C-A                                        | MAK31         | YML071C                 | COG8          |
| YDR378C                                          | LSM6          | YCR086W                 | CSM1          |
| YNL215W                                          | IES2          | YBR200W                 | BEM1          |
| YLR399C                                          | BDF1          | YLR315W                 | NKP2          |
| YHR039C-A                                        | VMA10         | YEL051W                 | VMA8          |
| YFR031C-A                                        | RPL2A         | YOR069W                 | VPS5          |
| YLR386W                                          | VAC14         | YDR439W                 | LRS4          |
| YBR030W                                          | YBR030W       | YPL037C                 | EGD1          |
| YLR090W                                          | XDJ1          | YBR019C                 | GAL10         |
| YNL291C                                          | MID1          | YDR080W                 | VPS41         |
| YBL047C                                          | EDE1          | YHR200W                 | RPN10         |
| YDR225W                                          | HTA1          | YBR009C                 | HHF1          |
| YDR358W                                          | GGA1          | YML071C                 | COG8          |

| Predictions at threshold level 0.80 continued... |               |                         |               |
|--------------------------------------------------|---------------|-------------------------|---------------|
| Gene1 of predicted pair                          |               | Gene2 of predicted pair |               |
| Systematic Name                                  | Standard Name | Systematic Name         | Standard Name |
| YML016C                                          | PPZ1          | YKL110C                 | KTI12         |
| YLR192C                                          | HCR1          | YAL002W                 | VPS8          |
| YJL204C                                          | RCY1          | YJR090C                 | GRR1          |
| YGL066W                                          | SGF73         | YPL018W                 | CTF19         |
| YPR017C                                          | DSS4          | YGL223C                 | COG1          |
| YNL041C                                          | COG6          | YER162C                 | RAD4          |
| YLR240W                                          | VPS34         | YPR173C                 | VPS4          |
| YNL264C                                          | PDR17         | YML097C                 | VPS9          |
| YHR073W                                          | OSH3          | YPL256C                 | CLN2          |
| YJL151C                                          | SNA3          | YJL004C                 | SYS1          |
| YLR441C                                          | RPS1A         | YPR036W                 | VMA13         |
| YJR060W                                          | CBF1          | YDR207C                 | UME6          |
| YOR127W                                          | RGA1          | YLR381W                 | CTF3          |
| YBR171W                                          | SEC66         | YPR030W                 | CSR2          |
| YPR036W                                          | VMA13         | YMR038C                 | CCS1          |
| YNR023W                                          | SNF12         | YHL025W                 | SNF6          |
| YKL213C                                          | DOA1          | YDR289C                 | RTT103        |
| YDL020C                                          | RPN4          | YLR150W                 | STM1          |
| YLR386W                                          | VAC14         | YDR207C                 | UME6          |
| YGR019W                                          | UGA1          | YDR254W                 | CHL4          |
| YNL307C                                          | MCK1          | YPL137C                 | GIP3          |
| YMR198W                                          | CIK1          | YLR370C                 | ARC18         |
| YEL065W                                          | SIT1          | YER122C                 | GLO3          |
| YBR127C                                          | VMA2          | YMR055C                 | BUB2          |
| YHR200W                                          | RPN10         | YOL081W                 | IRA2          |
| YPR051W                                          | MAK3          | YER120W                 | SCS2          |
| YKR001C                                          | VPS1          | YMR231W                 | PEP5          |
| YMR243C                                          | ZRC1          | YDR423C                 | CAD1          |
| YJR140C                                          | HIR3          | YJL124C                 | LSM1          |

| Predictions at threshold level 0.80 continued... |               |                         |               |
|--------------------------------------------------|---------------|-------------------------|---------------|
| Gene1 of predicted pair                          |               | Gene2 of predicted pair |               |
| Systematic Name                                  | Standard Name | Systematic Name         | Standard Name |
| YKL048C                                          | ELM1          | YHR081W                 | LRP1          |
| YGL066W                                          | SGF73         | YDR363W-A               | SEM1          |
| YKL116C                                          | PRR1          | YLR386W                 | VAC14         |
| YPR018W                                          | RLF2          | YHR013C                 | ARD1          |
| YOL043C                                          | NTG2          | YMR167W                 | MLH1          |
| YOR069W                                          | VPS5          | YOR035C                 | SHE4          |
| YLR337C                                          | VRP1          | YER122C                 | GLO3          |
| YKL048C                                          | ELM1          | YCR053W                 | THR4          |
| YDL020C                                          | RPN4          | YGL124C                 | MON1          |
| YIL156W                                          | UBP7          | YGL016W                 | KAP122        |
| YLR447C                                          | VMA6          | YNL051W                 | COG5          |
| YMR164C                                          | MSS11         | YML057W                 | CMP2          |
| YLR090W                                          | XDJ1          | YMR133W                 | REC114        |
| YLR083C                                          | EMP70         | YER120W                 | SCS2          |
| YNL289W                                          | PCL1          | YJL187C                 | SWE1          |
| YMR016C                                          | SOK2          | YNL058C                 | YNL058C       |
| YNL297C                                          | MON2          | YCL001W                 | RER1          |
| YNL076W                                          | MKS1          | YCR053W                 | THR4          |
| YDL020C                                          | RPN4          | YDR363W-A               | SEM1          |
| YKL110C                                          | KTI12         | YAR014C                 | BUD14         |
| YBL017C                                          | PEP1          | YNL238W                 | KEX2          |
| YDL160C                                          | DHH1          | YPL203W                 | TPK2          |
| YDR293C                                          | SSD1          | YDR080W                 | VPS41         |
| YOR290C                                          | SNF2          | YLR094C                 | GIS3          |
| YOR043W                                          | WHI2          | YJR084W                 | CSN12         |
| YDR320C                                          | SWA2          | YHL020C                 | OPI1          |
| YCL067C                                          | HMLALPHA2     | YGL025C                 | PGD1          |
| YNL069C                                          | RPL16B        | YNL041C                 | COG6          |
| YLR320W                                          | MMS22         | YPL137C                 | GIP3          |

| Predictions at threshold level 0.80 continued... |               |                         |               |
|--------------------------------------------------|---------------|-------------------------|---------------|
| Gene1 of predicted pair                          |               | Gene2 of predicted pair |               |
| Systematic Name                                  | Standard Name | Systematic Name         | Standard Name |
| YGL078C                                          | DBP3          | YBR173C                 | UMP1          |
| YFR010W                                          | UBP6          | YMR276W                 | DSK2          |
| YLR288C                                          | MEC3          | YGL250W                 | RMR1          |
| YBR200W                                          | BEM1          | YGL212W                 | VAM7          |
| YNL079C                                          | TPM1          | YHL011C                 | PRS3          |
| YEL044W                                          | IES6          | YGR135W                 | PRE9          |
| YNL206C                                          | RTT106        | YDR507C                 | GIN4          |
| YIR009W                                          | MSL1          | YPL213W                 | LEA1          |
| YBR030W                                          | YBR030W       | YLR452C                 | SST2          |
| YNL297C                                          | MON2          | YDR469W                 | SDC1          |
| YDL020C                                          | RPN4          | YHR178W                 | STB5          |
| YCL001W                                          | RER1          | YAL007C                 | ERP2          |
| YPL001W                                          | HAT1          | YBR215W                 | HPC2          |
| YLR410W                                          | VIP1          | YDR318W                 | MCM21         |
| YPR072W                                          | NOT5          | YBR010W                 | HHT1          |
| YOR141C                                          | ARP8          | YDL047W                 | SIT4          |
| YFR034C                                          | PHO4          | YPL248C                 | GAL4          |
| YIL053W                                          | RHR2          | YIL076W                 | SEC28         |
| YMR224C                                          | MRE11         | YDR245W                 | MNN10         |
| YNL291C                                          | MID1          | YOR014W                 | RTS1          |
| YDR137W                                          | RGP1          | YKL119C                 | VPH2          |
| YJL172W                                          | CPS1          | YPR046W                 | MCM16         |
| YDR192C                                          | NUP42         | YDR335W                 | MSN5          |
| YNL218W                                          | MGS1          | YFR010W                 | UBP6          |
| YIL076W                                          | SEC28         | YDL192W                 | ARF1          |
| YMR026C                                          | PEX12         | YDL065C                 | PEX19         |
| YML115C                                          | VAN1          | YEL053C                 | MAK10         |
| YML016C                                          | PPZ1          | YDR254W                 | CHL4          |
| YDR245W                                          | MNN10         | YEL036C                 | ANP1          |



| Predictions at threshold level 0.80 continued... |               |                         |               |
|--------------------------------------------------|---------------|-------------------------|---------------|
| Gene1 of predicted pair                          |               | Gene2 of predicted pair |               |
| Systematic Name                                  | Standard Name | Systematic Name         | Standard Name |
| YLR079W                                          | SIC1          | YPL018W                 | CTF19         |
| YOR243C                                          | PUS7          | YPL079W                 | RPL21B        |
| YML088W                                          | UFO1          | YJR090C                 | GRR1          |
| YAL024C                                          | LTE1          | YNR072W                 | HXT17         |
| YFR031C-A                                        | RPL2A         | YLR398C                 | SKI2          |
| YKL139W                                          | CTK1          | YNL087W                 | TCB2          |
| YGR270W                                          | YTA7          | YER161C                 | SPT2          |
| YCR034W                                          | FEN1          | YMR055C                 | BUB2          |
| YPR084W                                          | YPR084W       | YOR106W                 | VAM3          |
| YJL095W                                          | BCK1          | YBR114W                 | RAD16         |
| YNR052C                                          | POP2          | YJR135C                 | MCM22         |
| YPL115C                                          | BEM3          | YOR023C                 | AHC1          |
| YLR385C                                          | SWC7          | YNL107W                 | YAF9          |
| YBR217W                                          | ATG12         | YFR036W                 | CDC26         |
| YER116C                                          | SLX8          | YLR452C                 | SST2          |
| YBR171W                                          | SEC66         | YDR309C                 | GIC2          |
| YHR156C                                          | LIN1          | YNR072W                 | HXT17         |
| YDR484W                                          | VPS52         | YBR280C                 | SAF1          |
| YNL087W                                          | TCB2          | YFL023W                 | BUD27         |
| YPR084W                                          | YPR084W       | YJL004C                 | SYS1          |
| YGL151W                                          | NUT1          | YOR368W                 | RAD17         |
| YPL253C                                          | VIK1          | YPL161C                 | BEM4          |
| YBR030W                                          | YBR030W       | YPL161C                 | BEM4          |
| YLR240W                                          | VPS34         | YHR161C                 | YAP1801       |
| YFR010W                                          | UBP6          | YNL238W                 | KEX2          |
| YAL031C                                          | GIP4          | YCL027W                 | FUS1          |
| YPL161C                                          | BEM4          | YBR260C                 | RGD1          |
| YDL059C                                          | RAD59         | YJR090C                 | GRR1          |
| YDR469W                                          | SDC1          | YBR036C                 | CSG2          |

| Predictions at threshold level 0.80 continued... |               |                         |               |
|--------------------------------------------------|---------------|-------------------------|---------------|
| Gene1 of predicted pair                          |               | Gene2 of predicted pair |               |
| Systematic Name                                  | Standard Name | Systematic Name         | Standard Name |
| YKL139W                                          | CTK1          | YDR137W                 | RGP1          |
| YCR088W                                          | ABP1          | YJL095W                 | BCK1          |
| YHR171W                                          | ATG7          | YNR007C                 | ATG3          |
| YDR156W                                          | RPA14         | YBR131W                 | CCZ1          |
| YLR386W                                          | VAC14         | YBL025W                 | RRN10         |
| YKL048C                                          | ELM1          | YNL107W                 | YAF9          |
| YOR035C                                          | SHE4          | YBL025W                 | RRN10         |
| YJL036W                                          | SNX4          | YDR310C                 | SUM1          |
| YER096W                                          | SHC1          | YNL079C                 | TPM1          |
| YGL053W                                          | PRM8          | YAR031W                 | PRM9          |
| YPL129W                                          | TAF14         | YGL151W                 | NUT1          |
| YOR337W                                          | TEA1          | YLR398C                 | SKI2          |
| YLR090W                                          | XDJ1          | YKL048C                 | ELM1          |
| YNL248C                                          | RPA49         | YIL103W                 | DPH1          |
| YJR032W                                          | CPR7          | YOR327C                 | SNC2          |
| YPL050C                                          | MNN9          | YLR093C                 | NYV1          |
| YBR111W-A                                        | SUS1          | YPL181W                 | CTI6          |
| YNL025C                                          | SSN8          | YPL057C                 | SUR1          |
| YMR198W                                          | CIK1          | YLR410W                 | VIP1          |
| YGR217W                                          | CCH1          | YBL101C                 | ECM21         |
| YCL001W                                          | RER1          | YER122C                 | GLO3          |
| YLR240W                                          | VPS34         | YBR128C                 | ATG14         |
| YDR245W                                          | MNN10         | YDL155W                 | CLB3          |
| YMR224C                                          | MRE11         | YLL039C                 | UBI4          |
| YBL047C                                          | EDE1          | YIL008W                 | URM1          |
| YDR507C                                          | GIN4          | YNL166C                 | BNI5          |
| YDR293C                                          | SSD1          | YPL234C                 | TFP3          |
| YNL215W                                          | IES2          | YNL107W                 | YAF9          |
| YKR020W                                          | VPS51         | YPR032W                 | SRO7          |

| Predictions at threshold level 0.80 continued... |               |                         |               |
|--------------------------------------------------|---------------|-------------------------|---------------|
| Gene1 of predicted pair                          |               | Gene2 of predicted pair |               |
| Systematic Name                                  | Standard Name | Systematic Name         | Standard Name |
| YDR129C                                          | SAC6          | YBR057C                 | MUM2          |
| YDR378C                                          | LSM6          | YAR014C                 | BUD14         |
| YPL037C                                          | EGD1          | YER122C                 | GLO3          |
| YGR063C                                          | SPT4          | YBR089C-A               | NHP6B         |
| YBR030W                                          | YBR030W       | YER144C                 | UBP5          |
| YPR051W                                          | MAK3          | YJL004C                 | SYS1          |
| YOL112W                                          | MSB4          | YAL030W                 | SNC1          |
| YDR335W                                          | MSN5          | YLR315W                 | NKP2          |
| YBR278W                                          | DPB3          | YDR289C                 | RTT103        |
| YLR083C                                          | EMP70         | YIL076W                 | SEC28         |
| YBR217W                                          | ATG12         | YMR159C                 | ATG16         |
| YGR261C                                          | APL6          | YDR310C                 | SUM1          |
| YMR172W                                          | HOT1          | YNL166C                 | BNI5          |
| YGL212W                                          | VAM7          | YEL043W                 | YEL043W       |
| YBL058W                                          | SHP1          | YLR093C                 | NYV1          |
| YPL024W                                          | RMI1          | YDL154W                 | MSH5          |
| YDL160C                                          | DHH1          | YPL022W                 | RAD1          |
| YPR084W                                          | YPR084W       | YEL053C                 | MAK10         |
| YLR262C                                          | YPT6          | YHR098C                 | SFB3          |
| YLR337C                                          | VRP1          | YHL002W                 | HSE1          |
| YIL034C                                          | CAP2          | YHR111W                 | UBA4          |
| YLR381W                                          | CTF3          | YDL185W                 | TFP1          |
| YBR173C                                          | UMP1          | YPR030W                 | CSR2          |
| YFR031C-A                                        | RPL2A         | YER044C                 | ERG28         |
| YDR320C                                          | SWA2          | YEL043W                 | YEL043W       |
| YJL036W                                          | SNX4          | YPL120W                 | VPS30         |
| YOR337W                                          | TEA1          | YDL083C                 | RPS16B        |
| YOR043W                                          | WHI2          | YJL095W                 | BCK1          |
| YCR020C-A                                        | MAK31         | YER120W                 | SCS2          |

| Predictions at threshold level 0.80 continued... |               |                         |               |
|--------------------------------------------------|---------------|-------------------------|---------------|
| Gene1 of predicted pair                          |               | Gene2 of predicted pair |               |
| Systematic Name                                  | Standard Name | Systematic Name         | Standard Name |
| YGR249W                                          | MGA1          | YMR133W                 | REC114        |
| YML071C                                          | COG8          | YPL195W                 | APL5          |
| YDL052C                                          | SLC1          | YMR313C                 | TGL3          |
| YKL007W                                          | CAP1          | YJL154C                 | VPS35         |
| YJL204C                                          | RCY1          | YGL198W                 | YIP4          |
| YCL032W                                          | STE50         | YMR273C                 | ZDS1          |
| YPL115C                                          | BEM3          | YJL190C                 | RPS22A        |
| YBR108W                                          | YBR108W       | YPL057C                 | SUR1          |
| YBL103C                                          | RTG3          | YPR030W                 | CSR2          |
| YGR108W                                          | CLB1          | YOR080W                 | DIA2          |
| YDR004W                                          | RAD57         | YGL003C                 | CDH1          |
| YFL013C                                          | IES1          | YIR005W                 | IST3          |
| YDR137W                                          | RGP1          | YCR077C                 | PAT1          |
| YLR441C                                          | RPS1A         | YPL137C                 | GIP3          |
| YDR129C                                          | SAC6          | YDR207C                 | UME6          |
| YML102W                                          | CAC2          | YPL256C                 | CLN2          |
| YEL053C                                          | MAK10         | YPL195W                 | APL5          |
| YOR132W                                          | VPS17         | YOR069W                 | VPS5          |
| YKR061W                                          | KTR2          | YGL163C                 | RAD54         |
| YBR200W                                          | BEM1          | YML095C                 | RAD10         |
| YDR443C                                          | SSN2          | YBR030W                 | YBR030W       |
| YLR399C                                          | BDF1          | YGR252W                 | GCN5          |
| YDR477W                                          | SNF1          | YKL126W                 | YPK1          |
| YPR036W                                          | VMA13         | YDL192W                 | ARF1          |
| YKL139W                                          | CTK1          | YIL103W                 | DPH1          |
| YJR056C                                          | YJR056C       | YJL095W                 | BCK1          |
| YIL148W                                          | RPL40A        | YMR153W                 | NUP53         |
| YNL106C                                          | INP52         | YNL230C                 | ELA1          |
| YOR039W                                          | CKB2          | YJL095W                 | BCK1          |

| Predictions at threshold level 0.80 continued... |               |                         |               |
|--------------------------------------------------|---------------|-------------------------|---------------|
| Gene1 of predicted pair                          |               | Gene2 of predicted pair |               |
| Systematic Name                                  | Standard Name | Systematic Name         | Standard Name |
| YLR381W                                          | CTF3          | YPL018W                 | CTF19         |
| YLR447C                                          | VMA6          | YJR135C                 | MCM22         |
| YCL037C                                          | SRO9          | YEL043W                 | YEL043W       |
| YER162C                                          | RAD4          | YOR327C                 | SNC2          |
| YPR052C                                          | NHP6A         | YGL071W                 | AFT1          |
| YOR327C                                          | SNC2          | YDL192W                 | ARF1          |
| YKR101W                                          | SIR1          | YML109W                 | ZDS2          |
| YML103C                                          | NUP188        | YER110C                 | KAP123        |
| YLR425W                                          | TUS1          | YKL041W                 | VPS24         |
| YMR224C                                          | MRE11         | YLR313C                 | SPH1          |
| YEL043W                                          | YEL043W       | YML001W                 | YPT7          |
| YMR116C                                          | ASC1          | YPL161C                 | BEM4          |
| YLR095C                                          | IOC2          | YLR180W                 | SAM1          |
| YDR358W                                          | GGA1          | YKL041W                 | VPS24         |
| YER116C                                          | SLX8          | YGL115W                 | SNF4          |
| YPL042C                                          | SSN3          | YBR258C                 | SHG1          |
| YPL024W                                          | RMI1          | YOR001W                 | RRP6          |
| YBL103C                                          | RTG3          | YGL124C                 | MON1          |
| YLR094C                                          | GIS3          | YDR261C                 | EXG2          |
| YDL223C                                          | HBT1          | YPL161C                 | BEM4          |
| YMR214W                                          | SCJ1          | YER040W                 | GLN3          |
| YBR057C                                          | MUM2          | YBR107C                 | IML3          |
| YBR108W                                          | YBR108W       | YML071C                 | COG8          |
| YOR001W                                          | RRP6          | YHR167W                 | THP2          |
| YDL083C                                          | RPS16B        | YLR370C                 | ARC18         |
| YJR058C                                          | APS2          | YAL030W                 | SNC1          |
| YML115C                                          | VAN1          | YGR135W                 | PRE9          |
| YMR109W                                          | MYO5          | YPL018W                 | CTF19         |
| YJR060W                                          | CBF1          | YJR035W                 | RAD26         |

| Predictions at threshold level 0.80 continued... |               |                         |               |
|--------------------------------------------------|---------------|-------------------------|---------------|
| Gene1 of predicted pair                          |               | Gene2 of predicted pair |               |
| Systematic Name                                  | Standard Name | Systematic Name         | Standard Name |
| YDR378C                                          | LSM6          | YFR030W                 | MET10         |
| YLR360W                                          | VPS38         | YBR181C                 | RPS6B         |
| YPL106C                                          | SSE1          | YJR035W                 | RAD26         |
| YDL160C                                          | DHH1          | YJL164C                 | TPK1          |
| YPL022W                                          | RAD1          | YML028W                 | TSA1          |
| YNL307C                                          | MCK1          | YCR053W                 | THR4          |
| YMR055C                                          | BUB2          | YOR368W                 | RAD17         |
| YCL032W                                          | STE50         | YMR139W                 | RIM11         |
| YIL036W                                          | CST6          | YCR086W                 | CSM1          |
| YBR200W                                          | BEM1          | YDL192W                 | ARF1          |
| YDR293C                                          | SSD1          | YNL041C                 | COG6          |
| YBR194W                                          | SOY1          | YHR167W                 | THP2          |
| YKR072C                                          | SIS2          | YOL030W                 | GAS5          |
| YGL147C                                          | RPL9A         | YBR217W                 | ATG12         |
| YMR055C                                          | BUB2          | YGL252C                 | RTG2          |
| YBR217W                                          | ATG12         | YJL172W                 | CPS1          |
| YIL076W                                          | SEC28         | YDR153C                 | ENT5          |
| YHR156C                                          | LIN1          | YHR060W                 | VMA22         |
| YML115C                                          | VAN1          | YPR036W                 | VMA13         |
| YLR119W                                          | SRN2          | YDL184C                 | RPL41A        |
| YGR104C                                          | SRB5          | YLR357W                 | RSC2          |
| YNR072W                                          | HXT17         | YLR398C                 | SKI2          |
| YJL124C                                          | LSM1          | YOR308C                 | SNU66         |
| YCR024C-A                                        | PMP1          | YMR199W                 | CLN1          |
| YLR452C                                          | SST2          | YNL238W                 | KEX2          |
| YEL065W                                          | SIT1          | YLR398C                 | SKI2          |
| YPL115C                                          | BEM3          | YMR109W                 | MYO5          |
| YNL325C                                          | FIG4          | YLR452C                 | SST2          |
| YMR276W                                          | DSK2          | YOR124C                 | UBP2          |

| Predictions at threshold level 0.80 continued... |               |                         |               |
|--------------------------------------------------|---------------|-------------------------|---------------|
| Gene1 of predicted pair                          |               | Gene2 of predicted pair |               |
| Systematic Name                                  | Standard Name | Systematic Name         | Standard Name |
| YML115C                                          | VAN1          | YPR030W                 | CSR2          |
| YLR150W                                          | STM1          | YMR055C                 | BUB2          |
| YDL020C                                          | RPN4          | YCR086W                 | CSM1          |
| YDR443C                                          | SSN2          | YIL053W                 | RHR2          |
| YML103C                                          | NUP188        | YBR107C                 | IML3          |
| YPL018W                                          | CTF19         | YLR370C                 | ARC18         |
| YPL195W                                          | APL5          | YJR084W                 | CSN12         |
| YLR102C                                          | APC9          | YOR275C                 | RIM20         |
| YOL111C                                          | MDY2          | YMR230W                 | RPS10B        |
| YER110C                                          | KAP123        | YKL117W                 | SBA1          |
| YBR041W                                          | FAT1          | YKL140W                 | TGL1          |
| YGR019W                                          | UGA1          | YHR111W                 | UBA4          |
| YBL078C                                          | ATG8          | YLR093C                 | NYV1          |
| YIL034C                                          | CAP2          | YDR289C                 | RTT103        |
| YOR195W                                          | SLK19         | YGR135W                 | PRE9          |
| YOL012C                                          | HTZ1          | YBR089C-A               | NHP6B         |
| YPL042C                                          | SSN3          | YJR140C                 | HIR3          |
| YDL020C                                          | RPN4          | YHR013C                 | ARD1          |
| YLR018C                                          | POM34         | YAL055W                 | PEX22         |
| YOR290C                                          | SNF2          | YBR289W                 | SNF5          |
| YLR320W                                          | MMS22         | YGL003C                 | CDH1          |
| YBL047C                                          | EDE1          | YPL158C                 | YPL158C       |
| YMR172W                                          | HOT1          | YER110C                 | KAP123        |
| YDR202C                                          | RAV2          | YGR020C                 | VMA7          |
| YLR083C                                          | EMP70         | YOR132W                 | VPS17         |
| YLL039C                                          | UBI4          | YOL081W                 | IRA2          |
| YHR200W                                          | RPN10         | YOR213C                 | SAS5          |
| YGL003C                                          | CDH1          | YOL091W                 | SPO21         |
| YOL111C                                          | MDY2          | YJL095W                 | BCK1          |

| Predictions at threshold level 0.80 continued... |               |                         |               |
|--------------------------------------------------|---------------|-------------------------|---------------|
| Gene1 of predicted pair                          |               | Gene2 of predicted pair |               |
| Systematic Name                                  | Standard Name | Systematic Name         | Standard Name |
| YDL155W                                          | CLB3          | YAL002W                 | VPS8          |
| YGL161C                                          | YIP5          | YDL002C                 | NHP10         |
| YBR030W                                          | YBR030W       | YNL032W                 | SIW14         |
| YNL025C                                          | SSN8          | YPL042C                 | SSN3          |
| YCR020C-A                                        | MAK31         | YOR106W                 | VAM3          |
| YML019W                                          | OST6          | YEL036C                 | ANP1          |
| YML103C                                          | NUP188        | YLR381W                 | CTF3          |
| YLR150W                                          | STM1          | YDR076W                 | RAD55         |
| YPL045W                                          | VPS16         | YGL095C                 | VPS45         |
| YDR293C                                          | SSD1          | YPL161C                 | BEM4          |
| YNL307C                                          | MCK1          | YLR315W                 | NKP2          |
| YBR200W                                          | BEM1          | YGL237C                 | HAP2          |
| YHR205W                                          | SCH9          | YPL256C                 | CLN2          |
| YLR094C                                          | GIS3          | YLR371W                 | ROM2          |
| YDR358W                                          | GGA1          | YDR310C                 | SUM1          |
| YJL124C                                          | LSM1          | YOR124C                 | UBP2          |
| YAR014C                                          | BUD14         | YPR032W                 | SRO7          |
| YNL215W                                          | IES2          | YHR115C                 | DMA1          |
| YNL248C                                          | RPA49         | YDR254W                 | CHL4          |
| YLR360W                                          | VPS38         | YNL291C                 | MID1          |
| YOR038C                                          | HIR2          | YEL056W                 | HAT2          |
| YGL161C                                          | YIP5          | YKL032C                 | IXR1          |
| YJL117W                                          | PHO86         | YBR082C                 | UBC4          |
| YGL087C                                          | MMS2          | YNL291C                 | MID1          |
| YLL042C                                          | ATG10         | YMR159C                 | ATG16         |
| YOR337W                                          | TEA1          | YKR035W-A               | DID2          |
| YJL084C                                          | ALY2          | YIL050W                 | PCL7          |
| YGL033W                                          | HOP2          | YLR386W                 | VAC14         |
| YDR156W                                          | RPA14         | YOL081W                 | IRA2          |



| Predictions at threshold level 0.80 continued... |               |                         |               |
|--------------------------------------------------|---------------|-------------------------|---------------|
| Gene1 of predicted pair                          |               | Gene2 of predicted pair |               |
| Systematic Name                                  | Standard Name | Systematic Name         | Standard Name |
| YHR178W                                          | STB5          | YPR046W                 | MCM16         |
| YDL002C                                          | NHP10         | YMR038C                 | CCS1          |
| YFR010W                                          | UBP6          | YJL183W                 | MNN11         |
| YDR129C                                          | SAC6          | YOR035C                 | SHE4          |
| YNL288W                                          | CAF40         | YLR386W                 | VAC14         |
| YJR056C                                          | YJR056C       | YPL161C                 | BEM4          |
| YDR320C                                          | SWA2          | YNL041C                 | COG6          |
| YER161C                                          | SPT2          | YBR010W                 | HHT1          |
| YML058W                                          | SML1          | YDL059C                 | RAD59         |
| YLR398C                                          | SKI2          | YEL060C                 | PRB1          |
| YBR173C                                          | UMP1          | YGL212W                 | VAM7          |
| YMR273C                                          | ZDS1          | YHR167W                 | THP2          |
| YER161C                                          | SPT2          | YBR036C                 | CSG2          |
| YPL089C                                          | RLM1          | YBR082C                 | UBC4          |
| YJL176C                                          | SWI3          | YBR181C                 | RPS6B         |
| YMR216C                                          | SKY1          | YAR014C                 | BUD14         |
| YNL025C                                          | SSN8          | YDR448W                 | ADA2          |
| YBL008W                                          | HIR1          | YOR001W                 | RRP6          |
| YNL215W                                          | IES2          | YML097C                 | VPS9          |
| YJL053W                                          | PEP8          | YOL108C                 | INO4          |
| YER144C                                          | UBP5          | YMR214W                 | SCJ1          |
| YPR051W                                          | MAK3          | YNL051W                 | COG5          |
| YKL032C                                          | IXR1          | YDR378C                 | LSM6          |
| YMR261C                                          | TPS3          | YFL033C                 | RIM15         |
| YMR153W                                          | NUP53         | YLR320W                 | MMS22         |
| YBL051C                                          | PIN4          | YDR289C                 | RTT103        |
| YHR081W                                          | LRP1          | YDL192W                 | ARF1          |
| YGL054C                                          | ERV14         | YHR039C-A               | VMA10         |
| YHL031C                                          | GOS1          | YBR131W                 | CCZ1          |

| Predictions at threshold level 0.80 continued... |               |                         |               |
|--------------------------------------------------|---------------|-------------------------|---------------|
| Gene1 of predicted pair                          |               | Gene2 of predicted pair |               |
| Systematic Name                                  | Standard Name | Systematic Name         | Standard Name |
| YOR140W                                          | SFL1          | YPL203W                 | TPK2          |
| YOR213C                                          | SAS5          | YAL002W                 | VPS8          |
| YOR231W                                          | MKK1          | YJL095W                 | BCK1          |
| YJL157C                                          | FAR1          | YJR086W                 | STE18         |
| YNL206C                                          | RTT106        | YGL031C                 | RPL24A        |
| YHR060W                                          | VMA22         | YJL183W                 | MNN11         |
| YBR171W                                          | SEC66         | YNL307C                 | MCK1          |
| YMR004W                                          | MVP1          | YPL161C                 | BEM4          |
| YGL147C                                          | RPL9A         | YLR452C                 | SST2          |
| YDR202C                                          | RAV2          | YJR060W                 | CBF1          |
| YNL135C                                          | FPR1          | YIL133C                 | RPL16A        |
| YDL002C                                          | NHP10         | YMR055C                 | BUB2          |
| YNL215W                                          | IES2          | YER139C                 | YER139C       |
| YIL076W                                          | SEC28         | YDR202C                 | RAV2          |
| YDR440W                                          | DOT1          | YLR370C                 | ARC18         |
| YNL087W                                          | TCB2          | YNR072W                 | HXT17         |
| YPR051W                                          | MAK3          | YJR032W                 | CPR7          |
| YFR032C-A                                        | RPL29         | YJL095W                 | BCK1          |
| YDL006W                                          | PTC1          | YJL183W                 | MNN11         |
| YMR224C                                          | MRE11         | YJR032W                 | CPR7          |
| YGR270W                                          | YTA7          | YAR014C                 | BUD14         |
| YDL116W                                          | NUP84         | YNL215W                 | IES2          |
| YDL077C                                          | VAM6          | YDR153C                 | ENT5          |
| YPR072W                                          | NOT5          | YPL248C                 | GAL4          |
| YDR245W                                          | MNN10         | YKL204W                 | EAP1          |
| YIL034C                                          | CAP2          | YNL135C                 | FPR1          |
| YDR202C                                          | RAV2          | YKR020W                 | VPS51         |
| YKR059W                                          | TIF1          | YKL101W                 | HSL1          |
| YOR191W                                          | RIS1          | YNL106C                 | INP52         |

| Predictions at threshold level 0.80 continued... |               |                         |               |
|--------------------------------------------------|---------------|-------------------------|---------------|
| Gene1 of predicted pair                          |               | Gene2 of predicted pair |               |
| Systematic Name                                  | Standard Name | Systematic Name         | Standard Name |
| YOR337W                                          | TEA1          | YGL003C                 | CDH1          |
| YKL110C                                          | KTI12         | YIR005W                 | IST3          |
| YJL004C                                          | SYS1          | YOL108C                 | INO4          |
| YLR441C                                          | RPS1A         | YNL238W                 | KEX2          |
| YDR245W                                          | MNN10         | YOR008C                 | SLG1          |
| YGR072W                                          | UPF3          | YGL115W                 | SNF4          |
| YEL044W                                          | IES6          | YKR020W                 | VPS51         |
| YNL325C                                          | FIG4          | YNL041C                 | COG6          |
| YPL037C                                          | EGD1          | YLR371W                 | ROM2          |
| YAR014C                                          | BUD14         | YOL108C                 | INO4          |
| YML001W                                          | YPT7          | YOR327C                 | SNC2          |
| YJL029C                                          | VPS53         | YLR396C                 | VPS33         |
| YDR245W                                          | MNN10         | YER161C                 | SPT2          |
| YPL240C                                          | HSP82         | YHR072W-A               | NOP10         |
| YBL051C                                          | PIN4          | YBR114W                 | RAD16         |
| YHR156C                                          | LIN1          | YMR153W                 | NUP53         |
| YJL053W                                          | PEP8          | YDR323C                 | PEP7          |
| YJL176C                                          | SWI3          | YBR042C                 | CST26         |
| YHL031C                                          | GOS1          | YOR106W                 | VAM3          |
| YER096W                                          | SHC1          | YER049W                 | TPA1          |
| YLR148W                                          | PEP3          | YDR129C                 | SAC6          |
| YDL116W                                          | NUP84         | YDR192C                 | NUP42         |
| YML097C                                          | VPS9          | YLR398C                 | SKI2          |
| YML115C                                          | VAN1          | YPL253C                 | VIK1          |
| YOL090W                                          | MSH2          | YNL082W                 | PMS1          |
| YER162C                                          | RAD4          | YDR207C                 | UME6          |
| YDR245W                                          | MNN10         | YBR195C                 | MSI1          |
| YMR127C                                          | SAS2          | YNL107W                 | YAF9          |
| YLL007C                                          | YLL007C       | YPL161C                 | BEM4          |

| Predictions at threshold level 0.80 continued... |               |                         |               |
|--------------------------------------------------|---------------|-------------------------|---------------|
| Gene1 of predicted pair                          |               | Gene2 of predicted pair |               |
| Systematic Name                                  | Standard Name | Systematic Name         | Standard Name |
| YGR105W                                          | VMA21         | YER162C                 | RAD4          |
| YPL022W                                          | RAD1          | YPR046W                 | MCM16         |
| YLR447C                                          | VMA6          | YKL119C                 | VPH2          |
| YJR024C                                          | MDE1          | YML103C                 | NUP188        |
| YER116C                                          | SLX8          | YLR371W                 | ROM2          |
| YKL139W                                          | CTK1          | YER162C                 | RAD4          |
| YLR425W                                          | TUS1          | YOL081W                 | IRA2          |
| YBL058W                                          | SHP1          | YHR200W                 | RPN10         |
| YNL106C                                          | INP52         | YDR389W                 | SAC7          |
| YLR386W                                          | VAC14         | YKL126W                 | YPK1          |
| YJL036W                                          | SNX4          | YGL054C                 | ERV14         |
| YPL115C                                          | BEM3          | YDL020C                 | RPN4          |
| YMR216C                                          | SKY1          | YGL054C                 | ERV14         |
| YLR095C                                          | IOC2          | YDL192W                 | ARF1          |
| YHL002W                                          | HSE1          | YKL041W                 | VPS24         |
| YNL291C                                          | MID1          | YPL018W                 | CTF19         |
| YJL053W                                          | PEP8          | YPR051W                 | MAK3          |
| YIL034C                                          | CAP2          | YKL048C                 | ELM1          |
| YOR069W                                          | VPS5          | YJL204C                 | RCY1          |
| YDL116W                                          | NUP84         | YML057W                 | CMP2          |
| YCR077C                                          | PAT1          | YHL002W                 | HSE1          |
| YGR159C                                          | NSR1          | YHR052W                 | CIC1          |
| YEL053C                                          | MAK10         | YOR035C                 | SHE4          |
| YJL176C                                          | SWI3          | YKL139W                 | CTK1          |
| YDL020C                                          | RPN4          | YDL013W                 | SLX5          |
| YOR106W                                          | VAM3          | YNL199C                 | GCR2          |
| YML058W                                          | SML1          | YLR032W                 | RAD5          |
| YGL212W                                          | VAM7          | YOR043W                 | WHI2          |
| YEL027W                                          | CUP5          | YMR054W                 | STV1          |

| Predictions at threshold level 0.80 continued... |               |                         |               |
|--------------------------------------------------|---------------|-------------------------|---------------|
| Gene1 of predicted pair                          |               | Gene2 of predicted pair |               |
| Systematic Name                                  | Standard Name | Systematic Name         | Standard Name |
| YKR099W                                          | BAS1          | YGL025C                 | PGD1          |
| YNL087W                                          | TCB2          | YHR039C-A               | VMA10         |
| YFR030W                                          | MET10         | YDR318W                 | MCM21         |
| YER143W                                          | DDI1          | YMR276W                 | DSK2          |
| YHR060W                                          | VMA22         | YDL192W                 | ARF1          |
| YJL124C                                          | LSM1          | YLR410W                 | VIP1          |
| YKR035W-A                                        | DID2          | YER162C                 | RAD4          |
| YEL009C                                          | GCN4          | YBR009C                 | HHF1          |
| YDR137W                                          | RGP1          | YOR066W                 | MSA1          |
| YOL051W                                          | GAL11         | YBR089C-A               | NHP6B         |
| YJR040W                                          | GEF1          | YDR310C                 | SUM1          |
| YMR198W                                          | CIK1          | YJL058C                 | BIT61         |
| YKL139W                                          | CTK1          | YJR060W                 | CBF1          |
| YCR034W                                          | FEN1          | YCR031C                 | RPS14A        |
| YGR072W                                          | UPF3          | YOR243C                 | PUS7          |
| YLR417W                                          | VPS36         | YNL243W                 | SLA2          |
| YPR052C                                          | NHP6A         | YPL129W                 | TAF14         |
| YFL023W                                          | BUD27         | YDL192W                 | ARF1          |
| YDR174W                                          | HMO1          | YLR315W                 | NKP2          |
| YFR031C-A                                        | RPL2A         | YFR036W                 | CDC26         |
| YDL006W                                          | PTC1          | YJL004C                 | SYS1          |
| YNL069C                                          | RPL16B        | YOR112W                 | CEX1          |
| YFR031C-A                                        | RPL2A         | YKR099W                 | BAS1          |
| YOR327C                                          | SNC2          | YEL036C                 | ANP1          |
| YGL100W                                          | SEH1          | YCL061C                 | MRC1          |
| YHR156C                                          | LIN1          | YOR290C                 | SNF2          |
| YDL116W                                          | NUP84         | YGL115W                 | SNF4          |
| YIL034C                                          | CAP2          | YBL103C                 | RTG3          |
| YLR095C                                          | IOC2          | YBR200W                 | BEM1          |

| Predictions at threshold level 0.80 continued... |               |                         |               |
|--------------------------------------------------|---------------|-------------------------|---------------|
| Gene1 of predicted pair                          |               | Gene2 of predicted pair |               |
| Systematic Name                                  | Standard Name | Systematic Name         | Standard Name |
| YHR134W                                          | WSS1          | YJL095W                 | BCK1          |
| YKR072C                                          | SIS2          | YGL151W                 | NUT1          |
| YOR023C                                          | AHC1          | YDR289C                 | RTT103        |
| YML062C                                          | MFT1          | YPR046W                 | MCM16         |
| YHR178W                                          | STB5          | YBR107C                 | IML3          |
| YBR200W                                          | BEM1          | YLR254C                 | NDL1          |
| YOR033C                                          | EXO1          | YPL024W                 | RMI1          |
| YBL058W                                          | SHP1          | YER116C                 | SLX8          |
| YNL291C                                          | MID1          | YDR260C                 | SWM1          |
| YGL115W                                          | SNF4          | YER139C                 | YER139C       |
| YLR288C                                          | MEC3          | YPL001W                 | HAT1          |
| YOR270C                                          | VPH1          | YKL048C                 | ELM1          |
| YGL043W                                          | DST1          | YBR089C-A               | NHP6B         |
| YPR036W                                          | VMA13         | YMR311C                 | GLC8          |
| YAL010C                                          | MDM10         | YDR183W                 | PLP1          |
| YCR020C-A                                        | MAK31         | YGL212W                 | VAM7          |
| YLR248W                                          | RCK2          | YDL047W                 | SIT4          |
| YDR443C                                          | SSN2          | YDL192W                 | ARF1          |
| YML115C                                          | VAN1          | YBR131W                 | CCZ1          |
| YFR010W                                          | UBP6          | YPL161C                 | BEM4          |
| YHR134W                                          | WSS1          | YBR228W                 | SLX1          |
| YER180C-A                                        | SLO1          | YPL051W                 | ARL3          |
| YKL126W                                          | YPK1          | YNR072W                 | HXT17         |
| YDL155W                                          | CLB3          | YLR233C                 | EST1          |
| YGR270W                                          | YTA7          | YCR086W                 | CSM1          |
| YHR156C                                          | LIN1          | YNL087W                 | TCB2          |
| YNL238W                                          | KEX2          | YJL095W                 | BCK1          |
| YFR036W                                          | CDC26         | YJL095W                 | BCK1          |
| YBR231C                                          | SWC5          | YBR089C-A               | NHP6B         |

| Predictions at threshold level 0.80 continued... |               |                         |               |
|--------------------------------------------------|---------------|-------------------------|---------------|
| Gene1 of predicted pair                          |               | Gene2 of predicted pair |               |
| Systematic Name                                  | Standard Name | Systematic Name         | Standard Name |
| YJR060W                                          | CBF1          | YDL047W                 | SIT4          |
| YDR363W-A                                        | SEM1          | YER143W                 | DDI1          |
| YJL006C                                          | CTK2          | YBL072C                 | RPS8A         |
| YHL031C                                          | GOS1          | YKL160W                 | ELF1          |
| YNL206C                                          | RTT106        | YDR254W                 | CHL4          |
| YJL058C                                          | BIT61         | YNL107W                 | YAF9          |
| YDL116W                                          | NUP84         | YDL020C                 | RPN4          |
| YCR077C                                          | PAT1          | YOR124C                 | UBP2          |
| YLR119W                                          | SRN2          | YML115C                 | VAN1          |
| YPL234C                                          | TFP3          | YKL080W                 | VMA5          |
| YDL077C                                          | VAM6          | YMR230W                 | RPS10B        |
| YMR039C                                          | SUB1          | YBR036C                 | CSG2          |
| YDL002C                                          | NHP10         | YBR215W                 | HPC2          |
| YLR234W                                          | TOP3          | YDR207C                 | UME6          |
| YMR068W                                          | AVO2          | YNL047C                 | SLM2          |
| YLR309C                                          | IMH1          | YDR310C                 | SUM1          |
| YOR069W                                          | VPS5          | YML038C                 | YMD8          |
| YOR035C                                          | SHE4          | YBR019C                 | GAL10         |
| YHR178W                                          | STB5          | YCR086W                 | CSM1          |
| YLL039C                                          | UBI4          | YML115C                 | VAN1          |
| YOR127W                                          | RGA1          | YDR207C                 | UME6          |
| YGL087C                                          | MMS2          | YKL048C                 | ELM1          |
| YDR443C                                          | SSN2          | YNL199C                 | GCR2          |
| YPR018W                                          | RLF2          | YLR399C                 | BDF1          |
| YLR018C                                          | POM34         | YOR080W                 | DIA2          |
| YHR134W                                          | WSS1          | YML016C                 | PPZ1          |
| YOR109W                                          | INP53         | YPR173C                 | VPS4          |
| YDR484W                                          | VPS52         | YGL115W                 | SNF4          |
| YMR142C                                          | RPL13B        | YLR094C                 | GIS3          |

| Predictions at threshold level 0.80 continued... |               |                         |               |
|--------------------------------------------------|---------------|-------------------------|---------------|
| Gene1 of predicted pair                          |               | Gene2 of predicted pair |               |
| Systematic Name                                  | Standard Name | Systematic Name         | Standard Name |
| YDL099W                                          | BUG1          | YKL050C                 | YKL050C       |
| YBL103C                                          | RTG3          | YBR280C                 | SAF1          |
| YGL178W                                          | MPT5          | YDL074C                 | BRE1          |
| YDL184C                                          | RPL41A        | YNL076W                 | MKS1          |
| YLL007C                                          | YLL007C       | YDR155C                 | CPR1          |
| YMR055C                                          | BUB2          | YLR254C                 | NDL1          |
| YBL058W                                          | SHP1          | YOR066W                 | MSA1          |
| YOR127W                                          | RGA1          | YNL041C                 | COG6          |
| YMR004W                                          | MVP1          | YGL223C                 | COG1          |
| YPL024W                                          | RMI1          | YNL238W                 | KEX2          |
| YPL253C                                          | VIK1          | YOR368W                 | RAD17         |
| YJL190C                                          | RPS22A        | YOL067C                 | RTG1          |
| YPR036W                                          | VMA13         | YLR447C                 | VMA6          |
| YEL013W                                          | VAC8          | YLR350W                 | ORM2          |
| YBL058W                                          | SHP1          | YHR039C-A               | VMA10         |
| YLR386W                                          | VAC14         | YER139C                 | YER139C       |
| YLR234W                                          | TOP3          | YLR370C                 | ARC18         |
| YDR004W                                          | RAD57         | YDR335W                 | MSN5          |
| YKL010C                                          | UFD4          | YCR077C                 | PAT1          |
| YIL053W                                          | RHR2          | YMR214W                 | SCJ1          |
| YDR383C                                          | NKP1          | YPL018W                 | CTF19         |
| YDR254W                                          | CHL4          | YBR114W                 | RAD16         |
| YCL037C                                          | SRO9          | YPL105C                 | YPL105C       |
| YLR079W                                          | SIC1          | YGL016W                 | KAP122        |
| YKL048C                                          | ELM1          | YLR452C                 | SST2          |
| YIL162W                                          | SUC2          | YML019W                 | OST6          |
| YGL033W                                          | HOP2          | YER116C                 | SLX8          |
| YMR095C                                          | SNO1          | YJL183W                 | MNN11         |
| YBR215W                                          | HPC2          | YMR231W                 | PEP5          |



| Predictions at threshold level 0.80 continued... |               |                         |               |
|--------------------------------------------------|---------------|-------------------------|---------------|
| Gene1 of predicted pair                          |               | Gene2 of predicted pair |               |
| Systematic Name                                  | Standard Name | Systematic Name         | Standard Name |
| YMR224C                                          | MRE11         | YBL079W                 | NUP170        |
| YGL025C                                          | PGD1          | YGL124C                 | MON1          |
| YNL032W                                          | SIW14         | YJR032W                 | CPR7          |
| YER110C                                          | KAP123        | YGR188C                 | BUB1          |
| YBR217W                                          | ATG12         | YER144C                 | UBP5          |
| YDR385W                                          | EFT2          | YDR358W                 | GGA1          |
| YGL033W                                          | HOP2          | YOR043W                 | WHI2          |
| YBL008W                                          | HIR1          | YFR036W                 | CDC26         |
| YBR057C                                          | MUM2          | YOR014W                 | RTS1          |
| YKR072C                                          | SIS2          | YHR039C-A               | VMA10         |
| YJL058C                                          | BIT61         | YNL236W                 | SIN4          |
| YNL291C                                          | MID1          | YGR184C                 | UBR1          |
| YBR200W                                          | BEM1          | YDL159W                 | STE7          |
| YOR312C                                          | RPL20B        | YBL072C                 | RPS8A         |
| YBR107C                                          | IML3          | YPL106C                 | SSE1          |
| YDR146C                                          | SWI5          | YHR152W                 | SPO12         |
| YOR275C                                          | RIM20         | YMR038C                 | CCS1          |
| YDR363W-A                                        | SEM1          | YLR350W                 | ORM2          |
| YHR098C                                          | SFB3          | YDR334W                 | SWR1          |
| YDR443C                                          | SSN2          | YOL081W                 | IRA2          |
| YLR292C                                          | SEC72         | YDR310C                 | SUM1          |
| YGR072W                                          | UPF3          | YGR020C                 | VMA7          |
| YGR020C                                          | VMA7          | YNL051W                 | COG5          |
| YDR456W                                          | NHX1          | YEL036C                 | ANP1          |
| YGL033W                                          | HOP2          | YBR030W                 | YBR030W       |
| YJL060W                                          | BNA3          | YBR200W                 | BEM1          |
| YBR036C                                          | CSG2          | YBR280C                 | SAF1          |
| YLR441C                                          | RPS1A         | YEL053C                 | MAK10         |
| YLR360W                                          | VPS38         | YER096W                 | SHC1          |

| Predictions at threshold level 0.80 continued... |               |                         |               |
|--------------------------------------------------|---------------|-------------------------|---------------|
| Gene1 of predicted pair                          |               | Gene2 of predicted pair |               |
| Systematic Name                                  | Standard Name | Systematic Name         | Standard Name |
| YCR002C                                          | CDC10         | YNL166C                 | BNI5          |
| YJR040W                                          | GEF1          | YDR153C                 | ENT5          |
| YBL103C                                          | RTG3          | YLR370C                 | ARC18         |
| YDL223C                                          | HBT1          | YLR452C                 | SST2          |
| YGR105W                                          | VMA21         | YPL195W                 | APL5          |
| YMR205C                                          | PFK2          | YOR275C                 | RIM20         |
| YDR443C                                          | SSN2          | YJR056C                 | YJR056C       |
| YJL004C                                          | SYS1          | YOR284W                 | HUA2          |
| YPL240C                                          | HSP82         | YGL094C                 | PAN2          |
| YPR030W                                          | CSR2          | YOR327C                 | SNC2          |
| YML103C                                          | NUP188        | YHR013C                 | ARD1          |
| YBR107C                                          | IML3          | YNL107W                 | YAF9          |
| YJL036W                                          | SNX4          | YEL043W                 | YEL043W       |
| YGL250W                                          | RMR1          | YMR167W                 | MLH1          |
| YLR083C                                          | EMP70         | YDR320C                 | SWA2          |
| YLR093C                                          | NYV1          | YDL192W                 | ARF1          |
| YAL024C                                          | LTE1          | YNL087W                 | TCB2          |
| YOR195W                                          | SLK19         | YIR005W                 | IST3          |
| YOR043W                                          | WHI2          | YNL238W                 | KEX2          |
| YBR258C                                          | SHG1          | YNL107W                 | YAF9          |
| YLR192C                                          | HCR1          | YPL137C                 | GIP3          |
| YGL163C                                          | RAD54         | YKR048C                 | NAP1          |
| YKL129C                                          | MYO3          | YMR032W                 | HOF1          |
| YOR001W                                          | RRP6          | YLR381W                 | CTF3          |
| YER144C                                          | UBP5          | YLR180W                 | SAM1          |
| YGR020C                                          | VMA7          | YDR137W                 | RGP1          |
| YLR090W                                          | XDJ1          | YPL161C                 | BEM4          |
| YLR240W                                          | VPS34         | YKR001C                 | VPS1          |
| YNL087W                                          | TCB2          | YLR180W                 | SAM1          |

| Predictions at threshold level 0.80 continued... |               |                         |               |
|--------------------------------------------------|---------------|-------------------------|---------------|
| Gene1 of predicted pair                          |               | Gene2 of predicted pair |               |
| Systematic Name                                  | Standard Name | Systematic Name         | Standard Name |
| YGL133W                                          | ITC1          | YJL065C                 | DLS1          |
| YCR086W                                          | CSM1          | YLR182W                 | SWI6          |
| YGL060W                                          | YBP2          | YLR370C                 | ARC18         |
| YLR191W                                          | PEX13         | YGL153W                 | PEX14         |
| YLR083C                                          | EMP70         | YJL004C                 | SYS1          |
| YPL037C                                          | EGD1          | YDL192W                 | ARF1          |
| YOR270C                                          | VPH1          | YGL003C                 | CDH1          |
| YNL069C                                          | RPL16B        | YEL051W                 | VMA8          |
| YOR195W                                          | SLK19         | YMR199W                 | CLN1          |
| YBR009C                                          | HHF1          | YNL107W                 | YAF9          |
| YNL243W                                          | SLA2          | YER122C                 | GLO3          |
| YGR072W                                          | UPF3          | YNL069C                 | RPL16B        |
| YGL066W                                          | SGF73         | YPR119W                 | CLB2          |
| YIL053W                                          | RHR2          | YER044C                 | ERG28         |
| YOR033C                                          | EXO1          | YML095C                 | RAD10         |
| YIL159W                                          | BNR1          | YCR053W                 | THR4          |
| YNL025C                                          | SSN8          | YOR140W                 | SFL1          |
| YLR234W                                          | TOP3          | YGL253W                 | HXK2          |
| YPR046W                                          | MCM16         | YOR327C                 | SNC2          |
| YGL078C                                          | DBP3          | YJL183W                 | MNN11         |
| YLR386W                                          | VAC14         | YBL021C                 | HAP3          |
| YFR034C                                          | PHO4          | YHR200W                 | RPN10         |
| YDL020C                                          | RPN4          | YLR032W                 | RAD5          |
| YPL240C                                          | HSP82         | YGL192W                 | IME4          |
| YIL005W                                          | EPS1          | YKL117W                 | SBA1          |
| YFL023W                                          | BUD27         | YLR371W                 | ROM2          |
| YKR061W                                          | KTR2          | YCR086W                 | CSM1          |
| YNL166C                                          | BNI5          | YMR109W                 | MYO5          |
| YPL256C                                          | CLN2          | YGL016W                 | KAP122        |

| Predictions at threshold level 0.80 continued... |               |                         |               |
|--------------------------------------------------|---------------|-------------------------|---------------|
| Gene1 of predicted pair                          |               | Gene2 of predicted pair |               |
| Systematic Name                                  | Standard Name | Systematic Name         | Standard Name |
| YDR142C                                          | PEX7          | YGR077C                 | PEX8          |
| YOR066W                                          | MSA1          | YOL081W                 | IRA2          |
| YNL291C                                          | MID1          | YOL090W                 | MSH2          |
| YJL053W                                          | PEP8          | YJL004C                 | SYS1          |
| YNL297C                                          | MON2          | YOL018C                 | TLG2          |
| YDL116W                                          | NUP84         | YGL016W                 | KAP122        |
| YAL016W                                          | TPD3          | YPL152W                 | RRD2          |
| YFR036W                                          | CDC26         | YDR289C                 | RTT103        |
| YKL126W                                          | YPK1          | YKL048C                 | ELM1          |
| YOR290C                                          | SNF2          | YER040W                 | GLN3          |
| YBR200W                                          | BEM1          | YDL083C                 | RPS16B        |
| YOR069W                                          | VPS5          | YPR051W                 | MAK3          |
| YDR293C                                          | SSD1          | YDR108W                 | GSG1          |
| YMR224C                                          | MRE11         | YPL137C                 | GIP3          |
| YJR056C                                          | YJR056C       | YER162C                 | RAD4          |
| YGR270W                                          | YTA7          | YFR030W                 | MET10         |
| YAR014C                                          | BUD14         | YDR310C                 | SUM1          |
| YDL020C                                          | RPN4          | YHR077C                 | NMD2          |
| YJL137C                                          | GLG2          | YLR258W                 | GSY2          |
| YPR051W                                          | MAK3          | YDR310C                 | SUM1          |
| YOL121C                                          | RPS19A        | YBR019C                 | GAL10         |
| YJR135C                                          | MCM22         | YPL018W                 | CTF19         |
| YGL212W                                          | VAM7          | YGR135W                 | PRE9          |
| YCL063W                                          | VAC17         | YPR119W                 | CLB2          |
| YHR205W                                          | SCH9          | YOR106W                 | VAM3          |
| YJR140C                                          | HIR3          | YHR167W                 | THP2          |
| YNL199C                                          | GCR2          | YKR024C                 | DBP7          |
| YGR261C                                          | APL6          | YKR001C                 | VPS1          |
| YHR205W                                          | SCH9          | YDR264C                 | AKR1          |

| Predictions at threshold level 0.80 continued... |               |                         |               |
|--------------------------------------------------|---------------|-------------------------|---------------|
| Gene1 of predicted pair                          |               | Gene2 of predicted pair |               |
| Systematic Name                                  | Standard Name | Systematic Name         | Standard Name |
| YPL024W                                          | RMI1          | YDR310C                 | SUM1          |
| YLL039C                                          | UBI4          | YBR057C                 | MUM2          |
| YKR001C                                          | VPS1          | YGL095C                 | VPS45         |
| YDR383C                                          | NKP1          | YDR254W                 | CHL4          |
| YLR090W                                          | XDJ1          | YBR280C                 | SAF1          |
| YLR240W                                          | VPS34         | YGR241C                 | YAP1802       |
| YDR477W                                          | SNF1          | YOR014W                 | RTS1          |
| YIL076W                                          | SEC28         | YNL297C                 | MON2          |
| YDR289C                                          | RTT103        | YJL095W                 | BCK1          |
| YJR032W                                          | CPR7          | YDR155C                 | CPR1          |
| YOR337W                                          | TEA1          | YBR217W                 | ATG12         |
| YER044C                                          | ERG28         | YLR320W                 | MMS22         |
| YCL067C                                          | HMLALPHA2     | YLR176C                 | RFX1          |
| YPL129W                                          | TAF14         | YOR290C                 | SNF2          |
| YDL042C                                          | SIR2          | YNL030W                 | HHF2          |
| YLR288C                                          | MEC3          | YLR234W                 | TOP3          |
| YBR108W                                          | YBR108W       | YDL155W                 | CLB3          |
| YDR378C                                          | LSM6          | YBL072C                 | RPS8A         |
| YAL056W                                          | GPB2          | YGL121C                 | GPG1          |
| YPL105C                                          | YPL105C       | YNL107W                 | YAF9          |
| YGL078C                                          | DBP3          | YGL212W                 | VAM7          |
| YJL187C                                          | SWE1          | YER027C                 | GAL83         |
| YDL232W                                          | OST4          | YML019W                 | OST6          |
| YDR469W                                          | SDC1          | YGR135W                 | PRE9          |
| YHR060W                                          | VMA22         | YEL060C                 | PRB1          |
| YLR079W                                          | SIC1          | YML115C                 | VAN1          |
| YGL071W                                          | AFT1          | YBR112C                 | CYC8          |
| YHR156C                                          | LIN1          | YIL076W                 | SEC28         |
| YLR337C                                          | VRP1          | YMR172W                 | HOT1          |

| Predictions at threshold level 0.80 continued... |               |                         |               |
|--------------------------------------------------|---------------|-------------------------|---------------|
| Gene1 of predicted pair                          |               | Gene2 of predicted pair |               |
| Systematic Name                                  | Standard Name | Systematic Name         | Standard Name |
| YGL066W                                          | SGF73         | YDR076W                 | RAD55         |
| YDR335W                                          | MSN5          | YAR014C                 | BUD14         |
| YDR144C                                          | MKC7          | YHL002W                 | HSE1          |
| YMR095C                                          | SNO1          | YDR137W                 | RGP1          |
| YOR106W                                          | VAM3          | YPL045W                 | VPS16         |
| YFR031C-A                                        | RPL2A         | YOR127W                 | RGA1          |
| YPR036W                                          | VMA13         | YNL058C                 | YNL058C       |
| YPR036W                                          | VMA13         | YBR127C                 | VMA2          |
| YKL139W                                          | CTK1          | YPL161C                 | BEM4          |
| YMR198W                                          | CIK1          | YMR179W                 | SPT21         |
| YDR477W                                          | SNF1          | YKL048C                 | ELM1          |
| YLR381W                                          | CTF3          | YJL095W                 | BCK1          |
| YHR134W                                          | WSS1          | YPL079W                 | RPL21B        |
| YHR156C                                          | LIN1          | YBR030W                 | YBR030W       |
| YER161C                                          | SPT2          | YGL163C                 | RAD54         |
| YOR043W                                          | WHI2          | YLR093C                 | NYV1          |
| YHR052W                                          | CIC1          | YJL190C                 | RPS22A        |
| YNR052C                                          | POP2          | YJR063W                 | RPA12         |
| YGL147C                                          | RPL9A         | YLR093C                 | NYV1          |
| YMR080C                                          | NAM7          | YKL068W                 | NUP100        |
| YOR080W                                          | DIA2          | YLR429W                 | CRN1          |
| YNL236W                                          | SIN4          | YDL155W                 | CLB3          |
| YMR224C                                          | MRE11         | YDR129C                 | SAC6          |
| YGL212W                                          | VAM7          | YKR030W                 | GMH1          |
| YKL025C                                          | PAN3          | YGL124C                 | MON1          |
| YGR261C                                          | APL6          | YOL108C                 | INO4          |
| YOR375C                                          | GDH1          | YMR089C                 | YTA12         |
| YNL238W                                          | KEX2          | YPL120W                 | VPS30         |
| YPL161C                                          | BEM4          | YGL115W                 | SNF4          |

| Predictions at threshold level 0.80 continued... |               |                         |               |
|--------------------------------------------------|---------------|-------------------------|---------------|
| Gene1 of predicted pair                          |               | Gene2 of predicted pair |               |
| Systematic Name                                  | Standard Name | Systematic Name         | Standard Name |
| YMR109W                                          | MYO5          | YEL053C                 | MAK10         |
| YPL256C                                          | CLN2          | YMR311C                 | GLC8          |
| YNL238W                                          | KEX2          | YNL107W                 | YAF9          |
| YDR174W                                          | HMO1          | YPR046W                 | MCM16         |
| YHR052W                                          | CIC1          | YJL124C                 | LSM1          |
| YPL161C                                          | BEM4          | YDL006W                 | PTC1          |
| YOR195W                                          | SLK19         | YDR363W-A               | SEM1          |
| YGR104C                                          | SRB5          | YFL013C                 | IES1          |
| YKL213C                                          | DOA1          | YLR315W                 | NKP2          |
| YGL223C                                          | COG1          | YER162C                 | RAD4          |
| YPL105C                                          | YPL105C       | YMR054W                 | STV1          |
| YPL178W                                          | CBC2          | YNL199C                 | GCR2          |
| YFR036W                                          | CDC26         | YAR014C                 | BUD14         |
| YLR192C                                          | HCR1          | YOR327C                 | SNC2          |
| YDL006W                                          | PTC1          | YJR033C                 | RAV1          |
| YOR080W                                          | DIA2          | YDL155W                 | CLB3          |
| YKL126W                                          | YPK1          | YHR039C-A               | VMA10         |
| YDL232W                                          | OST4          | YGL226C-A               | OST5          |
| YNL243W                                          | SLA2          | YPL161C                 | BEM4          |
| YGR020C                                          | VMA7          | YGL115W                 | SNF4          |
| YIL053W                                          | RHR2          | YMR016C                 | SOK2          |
| YOR191W                                          | RIS1          | YHR134W                 | WSS1          |
| YFR010W                                          | UBP6          | YGR188C                 | BUB1          |
| YDR293C                                          | SSD1          | YNL051W                 | COG5          |
| YLR337C                                          | VRP1          | YML016C                 | PPZ1          |
| YDR439W                                          | LRS4          | YML016C                 | PPZ1          |
| YBR131W                                          | CCZ1          | YGL124C                 | MON1          |
| YNL201C                                          | PSY2          | YPL018W                 | CTF19         |
| YHL031C                                          | GOS1          | YGL200C                 | EMP24         |

| Predictions at threshold level 0.80 continued... |               |                         |               |
|--------------------------------------------------|---------------|-------------------------|---------------|
| Gene1 of predicted pair                          |               | Gene2 of predicted pair |               |
| Systematic Name                                  | Standard Name | Systematic Name         | Standard Name |
| YDL184C                                          | RPL41A        | YDL223C                 | HBT1          |
| YGL003C                                          | CDH1          | YDL192W                 | ARF1          |
| YLR182W                                          | SWI6          | YKR030W                 | GMH1          |
| YEL053C                                          | MAK10         | YOR327C                 | SNC2          |
| YBR020W                                          | GAL1          | YNL107W                 | YAF9          |
| YLR079W                                          | SIC1          | YKL110C                 | KTI12         |
| YPR018W                                          | RLF2          | YNL107W                 | YAF9          |
| YOR270C                                          | VPH1          | YOR043W                 | WHI2          |
| YML115C                                          | VAN1          | YCR077C                 | PAT1          |
| YGL223C                                          | COG1          | YJR033C                 | RAV1          |
| YGL158W                                          | RCK1          | YNL065W                 | AQR1          |
| YJL030W                                          | MAD2          | YHR205W                 | SCH9          |
| YBR171W                                          | SEC66         | YDR144C                 | MKC7          |
| YKL139W                                          | CTK1          | YLR094C                 | GIS3          |
| YDR156W                                          | RPA14         | YDR318W                 | MCM21         |
| YMR116C                                          | ASC1          | YDR378C                 | LSM6          |
| YLR386W                                          | VAC14         | YDR144C                 | MKC7          |
| YLR018C                                          | POM34         | YCR024C-A               | PMP1          |
| YMR016C                                          | SOK2          | YOR270C                 | VPH1          |
| YOR127W                                          | RGA1          | YJR032W                 | CPR7          |
| YPL115C                                          | BEM3          | YJL095W                 | BCK1          |
| YMR026C                                          | PEX12         | YER116C                 | SLX8          |
| YER129W                                          | SAK1          | YJR090C                 | GRR1          |
| YIL034C                                          | CAP2          | YML095C                 | RAD10         |
| YLR192C                                          | HCR1          | YOR270C                 | VPH1          |
| YOR008C                                          | SLG1          | YLR371W                 | ROM2          |
| YKL025C                                          | PAN3          | YIL008W                 | URM1          |
| YML117W                                          | NAB6          | YML115C                 | VAN1          |
| YNL041C                                          | COG6          | YBR019C                 | GAL10         |



| Predictions at threshold level 0.80 continued... |               |                         |               |
|--------------------------------------------------|---------------|-------------------------|---------------|
| Gene1 of predicted pair                          |               | Gene2 of predicted pair |               |
| Systematic Name                                  | Standard Name | Systematic Name         | Standard Name |
| YOL145C                                          | CTR9          | YOL051W                 | GAL11         |
| YLR079W                                          | SIC1          | YML016C                 | PPZ1          |
| YNL069C                                          | RPL16B        | YEL043W                 | YEL043W       |
| YGL147C                                          | RPL9A         | YDR137W                 | RGP1          |
| YLR095C                                          | IOC2          | YBL058W                 | SHP1          |
| YDR318W                                          | MCM21         | YHR114W                 | BZZ1          |
| YIL034C                                          | CAP2          | YEL056W                 | HAT2          |
| YGL212W                                          | VAM7          | YDR137W                 | RGP1          |
| YHR160C                                          | PEX18         | YDR244W                 | PEX5          |
| YOL018C                                          | TLG2          | YJR033C                 | RAV1          |
| YGR019W                                          | UGA1          | YDR318W                 | MCM21         |
| YNL106C                                          | INP52         | YNL248C                 | RPA49         |
| YML103C                                          | NUP188        | YER116C                 | SLX8          |
| YNL068C                                          | FKH2          | YGR135W                 | PRE9          |
| YNL289W                                          | PCL1          | YDR309C                 | GIC2          |
| YPL115C                                          | BEM3          | YEL053C                 | MAK10         |
| YGR249W                                          | MGA1          | YMR311C                 | GLC8          |
| YOR038C                                          | HIR2          | YER122C                 | GLO3          |
| YMR199W                                          | CLN1          | YIL008W                 | URM1          |
| YLR234W                                          | TOP3          | YML102W                 | CAC2          |
| YDR137W                                          | RGP1          | YLR447C                 | VMA6          |
| YOR080W                                          | DIA2          | YLR131C                 | ACE2          |
| YHL020C                                          | OPI1          | YLR309C                 | IMH1          |
| YDL116W                                          | NUP84         | YOR368W                 | RAD17         |
| YML095C                                          | RAD10         | YJL058C                 | BIT61         |
| YPL024W                                          | RMI1          | YLR441C                 | RPS1A         |
| YAL024C                                          | LTE1          | YOR270C                 | VPH1          |
| YIL036W                                          | CST6          | YJR063W                 | RPA12         |
| YPL112C                                          | PEX25         | YMR204C                 | INP1          |

| Predictions at threshold level 0.80 continued... |               |                         |               |
|--------------------------------------------------|---------------|-------------------------|---------------|
| Gene1 of predicted pair                          |               | Gene2 of predicted pair |               |
| Systematic Name                                  | Standard Name | Systematic Name         | Standard Name |
| YDR261C                                          | EXG2          | YJL095W                 | BCK1          |
| YLR018C                                          | POM34         | YJR024C                 | MDE1          |
| YBR010W                                          | HHT1          | YPL248C                 | GAL4          |
| YDL020C                                          | RPN4          | YMR038C                 | CCS1          |
| YBR260C                                          | RGD1          | YMR032W                 | HOF1          |
| YNL325C                                          | FIG4          | YJL095W                 | BCK1          |
| YEL060C                                          | PRB1          | YDR207C                 | UME6          |
| YDL160C                                          | DHH1          | YPR119W                 | CLB2          |
| YEL015W                                          | EDC3          | YER124C                 | DSE1          |
| YMR032W                                          | HOF1          | YHR114W                 | BZZ1          |
| YFR036W                                          | CDC26         | YGL252C                 | RTG2          |
| YLR234W                                          | TOP3          | YGL175C                 | SAE2          |
| YOR080W                                          | DIA2          | YML028W                 | TSA1          |
| YNL079C                                          | TPM1          | YLR425W                 | TUS1          |
| YPR036W                                          | VMA13         | YDL077C                 | VAM6          |
| YHR161C                                          | YAP1801       | YNR006W                 | VPS27         |
| YDR293C                                          | SSD1          | YJR033C                 | RAV1          |
| YDR146C                                          | SWI5          | YBR195C                 | MSI1          |
| YEL027W                                          | CUP5          | YKL080W                 | VMA5          |
| YBR107C                                          | IML3          | YML112W                 | CTK3          |
| YGR275W                                          | RTT102        | YNL041C                 | COG6          |
| YLR371W                                          | ROM2          | YGL003C                 | CDH1          |
| YLR006C                                          | SSK1          | YDR309C                 | GIC2          |
| YGL060W                                          | YBP2          | YOR195W                 | SLK19         |
| YDL155W                                          | CLB3          | YJL190C                 | RPS22A        |
| YBR108W                                          | YBR108W       | YGL151W                 | NUT1          |
| YHR178W                                          | STB5          | YHR012W                 | VPS29         |
| YKR020W                                          | VPS51         | YPL234C                 | TFP3          |
| YJR084W                                          | CSN12         | YER122C                 | GLO3          |

| Predictions at threshold level 0.80 continued... |               |                         |               |
|--------------------------------------------------|---------------|-------------------------|---------------|
| Gene1 of predicted pair                          |               | Gene2 of predicted pair |               |
| Systematic Name                                  | Standard Name | Systematic Name         | Standard Name |
| YDR245W                                          | MNN10         | YJL095W                 | BCK1          |
| YPL042C                                          | SSN3          | YDL155W                 | CLB3          |
| YBR195C                                          | MSI1          | YJR035W                 | RAD26         |
| YLR083C                                          | EMP70         | YPL105C                 | YPL105C       |
| YPL042C                                          | SSN3          | YBR200W                 | BEM1          |
| YIL002C                                          | INP51         | YKR020W                 | VPS51         |
| YKR061W                                          | KTR2          | YOL054W                 | PSH1          |
| YHR013C                                          | ARD1          | YBL101C                 | ECM21         |
| YLR234W                                          | TOP3          | YOL030W                 | GAS5          |
| YBR131W                                          | CCZ1          | YJR032W                 | CPR7          |
| YDR358W                                          | GGA1          | YJR084W                 | CSN12         |
| YAL024C                                          | LTE1          | YOR038C                 | HIR2          |
| YNL206C                                          | RTT106        | YDR318W                 | MCM21         |
| YKR020W                                          | VPS51         | YDR440W                 | DOT1          |
| YNL041C                                          | COG6          | YDL192W                 | ARF1          |
| YJR140C                                          | HIR3          | YGL163C                 | RAD54         |
| YLR094C                                          | GIS3          | YML071C                 | COG8          |
| YLR315W                                          | NKP2          | YNL225C                 | CNM67         |
| YLR095C                                          | IOC2          | YBR280C                 | SAF1          |
| YHL031C                                          | GOS1          | YGL115W                 | SNF4          |
| YOR344C                                          | TYE7          | YOL108C                 | INO4          |
| YLR386W                                          | VAC14         | YDR363W-A               | SEM1          |
| YOR080W                                          | DIA2          | YIR005W                 | IST3          |
| YDR261C                                          | EXG2          | YLR180W                 | SAM1          |
| YER116C                                          | SLX8          | YMR214W                 | SCJ1          |
| YBR131W                                          | CCZ1          | YLR396C                 | VPS33         |
| YKR035W-A                                        | DID2          | YOL081W                 | IRA2          |
| YDR448W                                          | ADA2          | YLR176C                 | RFX1          |
| YDR097C                                          | MSH6          | YNL082W                 | PMS1          |

| Predictions at threshold level 0.80 continued... |               |                         |               |
|--------------------------------------------------|---------------|-------------------------|---------------|
| Gene1 of predicted pair                          |               | Gene2 of predicted pair |               |
| Systematic Name                                  | Standard Name | Systematic Name         | Standard Name |
| YBL047C                                          | EDE1          | YFR036W                 | CDC26         |
| YOR308C                                          | SNU66         | YGR188C                 | BUB1          |
| YML115C                                          | VAN1          | YOR080W                 | DIA2          |
| YDL155W                                          | CLB3          | YDL226C                 | GCS1          |
| YJR090C                                          | GRR1          | YML028W                 | TSA1          |
| YLR386W                                          | VAC14         | YLR320W                 | MMS22         |
| YLR447C                                          | VMA6          | YDR183W                 | PLP1          |
| YNL054W                                          | VAC7          | YGR270W                 | YTA7          |
| YBR217W                                          | ATG12         | YJL183W                 | MNN11         |
| YML041C                                          | VPS71         | YBR089C-A               | NHP6B         |
| YMR153W                                          | NUP53         | YCR024C-A               | PMP1          |
| YOR127W                                          | RGA1          | YDR153C                 | ENT5          |
| YGL237C                                          | HAP2          | YJR135C                 | MCM22         |
| YMR224C                                          | MRE11         | YOR035C                 | SHE4          |
| YKL126W                                          | YPK1          | YLR398C                 | SKI2          |
| YPR051W                                          | MAK3          | YNL041C                 | COG6          |
| YML103C                                          | NUP188        | YNL107W                 | YAF9          |
| YOR290C                                          | SNF2          | YJL095W                 | BCK1          |
| YMR199W                                          | CLN1          | YML016C                 | PPZ1          |
| YJL095W                                          | BCK1          | YBL087C                 | RPL23A        |
| YMR055C                                          | BUB2          | YDR076W                 | RAD55         |
| YLR337C                                          | VRP1          | YMR109W                 | MYO5          |
| YOR039W                                          | CKB2          | YKL101W                 | HSL1          |
| YIL159W                                          | BNR1          | YHR039C-A               | VMA10         |
| YGL033W                                          | HOP2          | YER122C                 | GLO3          |
| YCR066W                                          | RAD18         | YHR060W                 | VMA22         |
| YLR265C                                          | NEJ1          | YGL090W                 | LIF1          |
| YNL215W                                          | IES2          | YJR140C                 | HIR3          |
| YPL129W                                          | TAF14         | YCR084C                 | TUP1          |

| Predictions at threshold level 0.80 continued... |               |                         |               |
|--------------------------------------------------|---------------|-------------------------|---------------|
| Gene1 of predicted pair                          |               | Gene2 of predicted pair |               |
| Systematic Name                                  | Standard Name | Systematic Name         | Standard Name |
| YNL325C                                          | FIG4          | YGL003C                 | CDH1          |
| YDR245W                                          | MNN10         | YMR038C                 | CCS1          |
| YBL051C                                          | PIN4          | YJR135C                 | MCM22         |
| YBR108W                                          | YBR108W       | YKR030W                 | GMH1          |
| YDR153C                                          | ENT5          | YAL002W                 | VPS8          |
| YMR224C                                          | MRE11         | YNR052C                 | POP2          |
| YGR105W                                          | VMA21         | YER072W                 | VTC1          |
| YLR018C                                          | POM34         | YDR076W                 | RAD55         |
| YJR060W                                          | CBF1          | YNL238W                 | KEX2          |
| YLR386W                                          | VAC14         | YJR084W                 | CSN12         |
| YPL024W                                          | RMI1          | YLR150W                 | STM1          |
| YNR072W                                          | HXT17         | YER122C                 | GLO3          |
| YCR024C-A                                        | PMP1          | YFL047W                 | RGD2          |
| YLR234W                                          | TOP3          | YDR245W                 | MNN10         |
| YJL060W                                          | BNA3          | YJR035W                 | RAD26         |
| YPR046W                                          | MCM16         | YDL226C                 | GCS1          |
| YNL229C                                          | URE2          | YPL256C                 | CLN2          |
| YBR200W                                          | BEM1          | YOR066W                 | MSA1          |
| YDR076W                                          | RAD55         | YEL056W                 | HAT2          |
| YIL053W                                          | RHR2          | YPL037C                 | EGD1          |
| YBR173C                                          | UMP1          | YGL124C                 | MON1          |
| YOR076C                                          | SKI7          | YLR135W                 | SLX4          |
| YBR171W                                          | SEC66         | YHL027W                 | RIM101        |
| YOL006C                                          | TOP1          | YHR056C                 | RSC30         |
| YFL023W                                          | BUD27         | YER139C                 | YER139C       |
| YLR094C                                          | GIS3          | YPR030W                 | CSR2          |
| YJL095W                                          | BCK1          | YHR115C                 | DMA1          |
| YNL135C                                          | FPR1          | YKR048C                 | NAP1          |
| YGL163C                                          | RAD54         | YHR010W                 | RPL27A        |

| Predictions at threshold level 0.80 continued... |               |                         |               |
|--------------------------------------------------|---------------|-------------------------|---------------|
| Gene1 of predicted pair                          |               | Gene2 of predicted pair |               |
| Systematic Name                                  | Standard Name | Systematic Name         | Standard Name |
| YEL065W                                          | SIT1          | YHR108W                 | GGA2          |
| YGL033W                                          | HOP2          | YGL003C                 | CDH1          |
| YBR065C                                          | ECM2          | YIR005W                 | IST3          |
| YGR135W                                          | PRE9          | YNL116W                 | DMA2          |
| YLR360W                                          | VPS38         | YDR484W                 | VPS52         |
| YOR337W                                          | TEA1          | YDL192W                 | ARF1          |
| YDR293C                                          | SSD1          | YHL002W                 | HSE1          |
| YBR290W                                          | BSD2          | YBL051C                 | PIN4          |
| YBR200W                                          | BEM1          | YHR111W                 | UBA4          |
| YHR200W                                          | RPN10         | YOL121C                 | RPS19A        |
| YJR135C                                          | MCM22         | YEL056W                 | HAT2          |
| YPL152W                                          | RRD2          | YNL225C                 | CNM67         |
| YPL234C                                          | TFP3          | YML071C                 | COG8          |
| YAL024C                                          | LTE1          | YNL206C                 | RTT106        |
| YBL051C                                          | PIN4          | YAL002W                 | VPS8          |
| YBR200W                                          | BEM1          | YLR452C                 | SST2          |
| YMR125W                                          | STO1          | YGL016W                 | KAP122        |
| YLR079W                                          | SIC1          | YPL253C                 | VIK1          |
| YDR129C                                          | SAC6          | YPL213W                 | LEA1          |
| YBR289W                                          | SNF5          | YDR073W                 | SNF11         |
| YPR018W                                          | RLF2          | YDR225W                 | HTA1          |
| YLR370C                                          | ARC18         | YDR207C                 | UME6          |
| YNL288W                                          | CAF40         | YOR358W                 | HAP5          |
| YDR192C                                          | NUP42         | YDL059C                 | RAD59         |
| YHL020C                                          | OPI1          | YML001W                 | YPT7          |
| YDL116W                                          | NUP84         | YOL126C                 | MDH2          |
| YBR108W                                          | YBR108W       | YGL253W                 | HXK2          |
| YHR013C                                          | ARD1          | YKL110C                 | KTI12         |
| YIL159W                                          | BNR1          | YHR115C                 | DMA1          |

| Predictions at threshold level 0.80 continued... |               |                         |               |
|--------------------------------------------------|---------------|-------------------------|---------------|
| Gene1 of predicted pair                          |               | Gene2 of predicted pair |               |
| Systematic Name                                  | Standard Name | Systematic Name         | Standard Name |
| YDR320C                                          | SWA2          | YOR106W                 | VAM3          |
| YNL288W                                          | CAF40         | YJR032W                 | CPR7          |
| YDR320C                                          | SWA2          | YER122C                 | GLO3          |
| YHR012W                                          | VPS29         | YNL127W                 | FAR11         |
| YOR332W                                          | VMA4          | YDL161W                 | ENT1          |
| YOR195W                                          | SLK19         | YDR507C                 | GIN4          |
| YLR119W                                          | SRN2          | YJL183W                 | MNN11         |
| YKR101W                                          | SIR1          | YDR310C                 | SUM1          |
| YDR076W                                          | RAD55         | YOR014W                 | RTS1          |
| YPL022W                                          | RAD1          | YFL023W                 | BUD27         |
| YGL060W                                          | YBP2          | YDL226C                 | GCS1          |
| YGR241C                                          | YAP1802       | YDR129C                 | SAC6          |
| YDR477W                                          | SNF1          | YJL183W                 | MNN11         |
| YGR270W                                          | YTA7          | YJR135C                 | MCM22         |
| YBL102W                                          | SFT2          | YPL234C                 | TFP3          |
| YBL051C                                          | PIN4          | YGL253W                 | HXK2          |
| YGR249W                                          | MGA1          | YKL139W                 | CTK1          |
| YGL249W                                          | ZIP2          | YLR394W                 | CST9          |
| YDR383C                                          | NKP1          | YNL106C                 | INP52         |
| YGL078C                                          | DBP3          | YDL192W                 | ARF1          |
| YGL134W                                          | PCL10         | YER059W                 | PCL6          |
| YDR440W                                          | DOT1          | YOR124C                 | UBP2          |
| YBR200W                                          | BEM1          | YDR335W                 | MSN5          |
| YHR160C                                          | PEX18         | YIL160C                 | POT1          |
| YER068W                                          | MOT2          | YJL164C                 | TPK1          |
| YDR378C                                          | LSM6          | YOR038C                 | HIR2          |
| YBL008W                                          | HIR1          | YBR036C                 | CSG2          |
| YPL057C                                          | SUR1          | YEL060C                 | PRB1          |
| YOR043W                                          | WHI2          | YGL151W                 | NUT1          |

| Predictions at threshold level 0.80 continued... |               |                         |               |
|--------------------------------------------------|---------------|-------------------------|---------------|
| Gene1 of predicted pair                          |               | Gene2 of predicted pair |               |
| Systematic Name                                  | Standard Name | Systematic Name         | Standard Name |
| YEL053C                                          | MAK10         | YGL003C                 | CDH1          |
| YOR327C                                          | SNC2          | YCR053W                 | THR4          |
| YGL147C                                          | RPL9A         | YKL048C                 | ELM1          |
| YNL291C                                          | MID1          | YHR013C                 | ARD1          |
| YGL066W                                          | SGF73         | YKL139W                 | CTK1          |
| YBR173C                                          | UMP1          | YNL087W                 | TCB2          |
| YFR010W                                          | UBP6          | YOL054W                 | PSH1          |
| YNL032W                                          | SIW14         | YER116C                 | SLX8          |
| YLR371W                                          | ROM2          | YDR358W                 | GGA1          |
| YJR090C                                          | GRR1          | YOL067C                 | RTG1          |
| YFR031C-A                                        | RPL2A         | YOR106W                 | VAM3          |
| YPR040W                                          | TIP41         | YHR111W                 | UBA4          |
| YGL087C                                          | MMS2          | YOR312C                 | RPL20B        |
| YEL043W                                          | YEL043W       | YMR054W                 | STV1          |
| YPL112C                                          | PEX25         | YLR324W                 | PEX30         |
| YOR243C                                          | PUS7          | YPL057C                 | SUR1          |
| YLR135W                                          | SLX4          | YBL079W                 | NUP170        |
| YGL147C                                          | RPL9A         | YLR398C                 | SKI2          |
| YGR270W                                          | YTA7          | YDR440W                 | DOT1          |
| YGR081C                                          | SLX9          | YPL256C                 | CLN2          |
| YIL005W                                          | EPS1          | YJR032W                 | CPR7          |
| YNL054W                                          | VAC7          | YLR254C                 | NDL1          |
| YOR270C                                          | VPH1          | YEL051W                 | VMA8          |
| YDR329C                                          | PEX3          | YGR239C                 | PEX21         |
| YGR020C                                          | VMA7          | YPR032W                 | SRO7          |
| YDR146C                                          | SWI5          | YHL011C                 | PRS3          |
| YBR041W                                          | FAT1          | YPL089C                 | RLM1          |
| YER107C                                          | GLE2          | YNL107W                 | YAF9          |
| YGL087C                                          | MMS2          | YDL155W                 | CLB3          |



| Predictions at threshold level 0.80 continued... |               |                         |               |
|--------------------------------------------------|---------------|-------------------------|---------------|
| Gene1 of predicted pair                          |               | Gene2 of predicted pair |               |
| Systematic Name                                  | Standard Name | Systematic Name         | Standard Name |
| YKR099W                                          | BAS1          | YOR066W                 | MSA1          |
| YMR095C                                          | SNO1          | YBR126C                 | TPS1          |
| YKL139W                                          | CTK1          | YBR280C                 | SAF1          |
| YDR378C                                          | LSM6          | YER161C                 | SPT2          |
| YGL003C                                          | CDH1          | YMR230W                 | RPS10B        |
| YPR084W                                          | YPR084W       | YPL120W                 | VPS30         |
| YLR360W                                          | VPS38         | YHR111W                 | UBA4          |
| YEL043W                                          | YEL043W       | YHR039C-A               | VMA10         |
| YJL210W                                          | PEX2          | YDR265W                 | PEX10         |
| YPL057C                                          | SUR1          | YKR099W                 | BAS1          |
| YDL116W                                          | NUP84         | YDR183W                 | PLP1          |
| YOR195W                                          | SLK19         | YIL103W                 | DPH1          |
| YHL027W                                          | RIM101        | YOR035C                 | SHE4          |
| YGR261C                                          | APL6          | YPL120W                 | VPS30         |
| YHR073W                                          | OSH3          | YJR059W                 | PTK2          |
| YLL007C                                          | YLL007C       | YLR337C                 | VRP1          |
| YIL076W                                          | SEC28         | YDR363W-A               | SEM1          |
| YJR135C                                          | MCM22         | YDR469W                 | SDC1          |
| YBR019C                                          | GAL10         | YJR084W                 | CSN12         |
| YNL106C                                          | INP52         | YLR315W                 | NKP2          |
| YML115C                                          | VAN1          | YCR086W                 | CSM1          |
| YOR132W                                          | VPS17         | YPR051W                 | MAK3          |
| YDR254W                                          | CHL4          | YGL163C                 | RAD54         |
| YLR079W                                          | SIC1          | YJL157C                 | FAR1          |
| YDL002C                                          | NHP10         | YKL160W                 | ELF1          |
| YEL056W                                          | HAT2          | YGR188C                 | BUB1          |
| YKL048C                                          | ELM1          | YGL163C                 | RAD54         |
| YJL154C                                          | VPS35         | YPL195W                 | APL5          |
| YKL139W                                          | CTK1          | YDR484W                 | VPS52         |

| Predictions at threshold level 0.80 continued... |               |                         |               |
|--------------------------------------------------|---------------|-------------------------|---------------|
| Gene1 of predicted pair                          |               | Gene2 of predicted pair |               |
| Systematic Name                                  | Standard Name | Systematic Name         | Standard Name |
| YBR131W                                          | CCZ1          | YPL195W                 | APL5          |
| YNL068C                                          | FKH2          | YPL256C                 | CLN2          |
| YLR337C                                          | VRP1          | YDR129C                 | SAC6          |
| YJR125C                                          | ENT3          | YDL137W                 | ARF2          |
| YBR290W                                          | BSD2          | YBR200W                 | BEM1          |
| YNL058C                                          | YNL058C       | YPL161C                 | BEM4          |
| YHR012W                                          | VPS29         | YDR144C                 | MKC7          |
| YAL024C                                          | LTE1          | YDL080C                 | THI3          |
| YPL050C                                          | MNN9          | YLR370C                 | ARC18         |
| YLR119W                                          | SRN2          | YDR207C                 | UME6          |
| YPR017C                                          | DSS4          | YFL033C                 | RIM15         |
| YNL106C                                          | INP52         | YJR140C                 | HIR3          |
| YDR358W                                          | GGA1          | YJL095W                 | BCK1          |
| YJR032W                                          | CPR7          | YBR280C                 | SAF1          |
| YHL031C                                          | GOS1          | YCR077C                 | PAT1          |
| YDR439W                                          | LRS4          | YLR410W                 | VIP1          |
| YOL031C                                          | SIL1          | YMR214W                 | SCJ1          |
| YDR443C                                          | SSN2          | YNL032W                 | SIW14         |
| YPR036W                                          | VMA13         | YPL137C                 | GIP3          |
| YNL116W                                          | DMA2          | YAR014C                 | BUD14         |
| YLR093C                                          | NYV1          | YJR084W                 | CSN12         |
| YKL048C                                          | ELM1          | YAR014C                 | BUD14         |
| YLR360W                                          | VPS38         | YDR108W                 | GSG1          |
| YDL047W                                          | SIT4          | YGL031C                 | RPL24A        |
| YMR255W                                          | GFD1          | YMR273C                 | ZDS1          |
| YJL053W                                          | PEP8          | YCL037C                 | SRO9          |
| YCL032W                                          | STE50         | YHR061C                 | GIC1          |
| YFR010W                                          | UBP6          | YER144C                 | UBP5          |
| YGL135W                                          | RPL1B         | YJR084W                 | CSN12         |

| Predictions at threshold level 0.80 continued... |               |                         |               |
|--------------------------------------------------|---------------|-------------------------|---------------|
| Gene1 of predicted pair                          |               | Gene2 of predicted pair |               |
| Systematic Name                                  | Standard Name | Systematic Name         | Standard Name |
| YGL066W                                          | SGF73         | YHR152W                 | SPO12         |
| YDL223C                                          | HBT1          | YDL077C                 | VAM6          |
| YNL076W                                          | MKS1          | YBR280C                 | SAF1          |
| YBR228W                                          | SLX1          | YNL248C                 | RPA49         |
| YGL212W                                          | VAM7          | YGL003C                 | CDH1          |
| YNL068C                                          | FKH2          | YDR363W-A               | SEM1          |
| YOR035C                                          | SHE4          | YMR311C                 | GLC8          |
| YIL053W                                          | RHR2          | YBR019C                 | GAL10         |
| YLL007C                                          | YLL007C       | YGR270W                 | YTA7          |
| YHR200W                                          | RPN10         | YDR071C                 | PAA1          |
| YDR254W                                          | CHL4          | YGL003C                 | CDH1          |
| YGL033W                                          | HOP2          | YLR452C                 | SST2          |
| YPL018W                                          | CTF19         | YLR032W                 | RAD5          |
| YBL021C                                          | HAP3          | YDR183W                 | PLP1          |
| YML071C                                          | COG8          | YLR370C                 | ARC18         |
| YLR090W                                          | XDJ1          | YFR010W                 | UBP6          |
| YDR335W                                          | MSN5          | YNL307C                 | MCK1          |
| YOR127W                                          | RGA1          | YDR080W                 | VPS41         |
| YNL094W                                          | APP1          | YBR108W                 | YBR108W       |
| YNL085W                                          | MKT1          | YMR127C                 | SAS2          |
| YGL078C                                          | DBP3          | YER040W                 | GLN3          |
| YHL020C                                          | OPI1          | YDR310C                 | SUM1          |
| YKL126W                                          | YPK1          | YMR311C                 | GLC8          |
| YCR081W                                          | SRB8          | YBR200W                 | BEM1          |
| YLR192C                                          | HCR1          | YDL083C                 | RPS16B        |
| YHR081W                                          | LRP1          | YER162C                 | RAD4          |
| YOL121C                                          | RPS19A        | YCR053W                 | THR4          |
| YJL036W                                          | SNX4          | YFL033C                 | RIM15         |
| YLR360W                                          | VPS38         | YEL053C                 | MAK10         |

| Predictions at threshold level 0.80 continued... |               |                         |               |
|--------------------------------------------------|---------------|-------------------------|---------------|
| Gene1 of predicted pair                          |               | Gene2 of predicted pair |               |
| Systematic Name                                  | Standard Name | Systematic Name         | Standard Name |
| YDL047W                                          | SIT4          | YDL226C                 | GCS1          |
| YPR017C                                          | DSS4          | YKR030W                 | GMH1          |
| YPR131C                                          | NAT3          | YJL058C                 | BIT61         |
| YPL057C                                          | SUR1          | YLR182W                 | SWI6          |
| YDR137W                                          | RGP1          | YKR099W                 | BAS1          |
| YHR205W                                          | SCH9          | YDR207C                 | UME6          |
| YER120W                                          | SCS2          | YKR030W                 | GMH1          |
| YKL048C                                          | ELM1          | YER139C                 | YER139C       |
| YAL024C                                          | LTE1          | YLR371W                 | ROM2          |
| YOR080W                                          | DIA2          | YLR313C                 | SPH1          |
| YGR217W                                          | CCH1          | YJL095W                 | BCK1          |
| YDL184C                                          | RPL41A        | YLR398C                 | SKI2          |
| YEL043W                                          | YEL043W       | YPL195W                 | APL5          |
| YOL111C                                          | MDY2          | YER044C                 | ERG28         |
| YPR051W                                          | MAK3          | YCR066W                 | RAD18         |
| YBL051C                                          | PIN4          | YGL151W                 | NUT1          |
| YPR072W                                          | NOT5          | YKL048C                 | ELM1          |
| YPR131C                                          | NAT3          | YJR090C                 | GRR1          |
| YDL020C                                          | RPN4          | YJL176C                 | SWI3          |
| YHR205W                                          | SCH9          | YPL240C                 | HSP82         |
| YDR440W                                          | DOT1          | YBL101C                 | ECM21         |
| YPL161C                                          | BEM4          | YDL155W                 | CLB3          |
| YOR043W                                          | WHI2          | YGR188C                 | BUB1          |
| YLR292C                                          | SEC72         | YHR114W                 | BZZ1          |
| YHR200W                                          | RPN10         | YDR358W                 | GGA1          |
| YBR289W                                          | SNF5          | YDR071C                 | PAA1          |
| YPR120C                                          | CLB5          | YFR036W                 | CDC26         |
| YML016C                                          | PPZ1          | YDR245W                 | MNN10         |
| YPR018W                                          | RLF2          | YOR213C                 | SAS5          |

| Predictions at threshold level 0.80 continued... |               |                         |               |
|--------------------------------------------------|---------------|-------------------------|---------------|
| Gene1 of predicted pair                          |               | Gene2 of predicted pair |               |
| Systematic Name                                  | Standard Name | Systematic Name         | Standard Name |
| YHR084W                                          | STE12         | YPR119W                 | CLB2          |
| YPR072W                                          | NOT5          | YBR289W                 | SNF5          |
| YCR066W                                          | RAD18         | YDR153C                 | ENT5          |
| YDL116W                                          | NUP84         | YGL003C                 | CDH1          |
| YDR183W                                          | PLP1          | YOL067C                 | RTG1          |
| YDR245W                                          | MNN10         | YDR076W                 | RAD55         |
| YDL042C                                          | SIR2          | YBR010W                 | HHT1          |
| YGL033W                                          | HOP2          | YBR108W                 | YBR108W       |
| YCR086W                                          | CSM1          | YNL107W                 | YAF9          |
| YDL077C                                          | VAM6          | YKR030W                 | GMH1          |
| YNL166C                                          | BNI5          | YBR114W                 | RAD16         |
| YGR019W                                          | UGA1          | YMR055C                 | BUB2          |
| YMR224C                                          | MRE11         | YBL072C                 | RPS8A         |
| YHR081W                                          | LRP1          | YCR053W                 | THR4          |
| YJR060W                                          | CBF1          | YGR188C                 | BUB1          |
| YDR335W                                          | MSN5          | YHR115C                 | DMA1          |
| YHR081W                                          | LRP1          | YLR180W                 | SAM1          |
| YNL243W                                          | SLA2          | YOR327C                 | SNC2          |
| YAL024C                                          | LTE1          | YMR152W                 | YIM1          |
| YDL160C                                          | DHH1          | YPL042C                 | SSN3          |
| YPL195W                                          | APL5          | YLR309C                 | IMH1          |
| YJL154C                                          | VPS35         | YNL069C                 | RPL16B        |
| YBR107C                                          | IML3          | YMR109W                 | MYO5          |
| YOL111C                                          | MDY2          | YBR036C                 | CSG2          |
| YDL160C                                          | DHH1          | YKL101W                 | HSL1          |
| YMR199W                                          | CLN1          | YKR057W                 | RPS21A        |
| YLR381W                                          | CTF3          | YDR076W                 | RAD55         |
| YGL253W                                          | HXK2          | YNL107W                 | YAF9          |
| YEL051W                                          | VMA8          | YOR327C                 | SNC2          |

| Predictions at threshold level 0.80 continued... |               |                         |               |
|--------------------------------------------------|---------------|-------------------------|---------------|
| Gene1 of predicted pair                          |               | Gene2 of predicted pair |               |
| Systematic Name                                  | Standard Name | Systematic Name         | Standard Name |
| YLR381W                                          | CTF3          | YJR035W                 | RAD26         |
| YDL059C                                          | RAD59         | YBL079W                 | NUP170        |
| YDR071C                                          | PAA1          | YOR064C                 | YNG1          |
| YPL001W                                          | HAT1          | YGL151W                 | NUT1          |
| YHR014W                                          | SPO13         | YOR109W                 | INP53         |
| YPL115C                                          | BEM3          | YPL253C                 | VIK1          |
| YNL054W                                          | VAC7          | YOR141C                 | ARP8          |
| YLR315W                                          | NKP2          | YPR046W                 | MCM16         |
| YKL139W                                          | CTK1          | YJL140W                 | RPB4          |
| YMR109W                                          | MYO5          | YBR114W                 | RAD16         |
| YDR156W                                          | RPA14         | YJR135C                 | MCM22         |
| YLR386W                                          | VAC14         | YHR114W                 | BZZ1          |
| YGR249W                                          | MGA1          | YBR173C                 | UMP1          |
| YGL066W                                          | SGF73         | YDR335W                 | MSN5          |
| YIL162W                                          | SUC2          | YBR283C                 | SSH1          |
| YKR001C                                          | VPS1          | YFL033C                 | RIM15         |
| YIL007C                                          | NAS2          | YPL112C                 | PEX25         |
| YGL124C                                          | MON1          | YLR398C                 | SKI2          |
| YGL006W                                          | PMC1          | YDR080W                 | VPS41         |
| YBR084C-A                                        | RPL19A        | YGR135W                 | PRE9          |
| YOR327C                                          | SNC2          | YNR032W                 | PPG1          |
| YKL213C                                          | DOA1          | YJL095W                 | BCK1          |
| YGL147C                                          | RPL9A         | YDR358W                 | GGA1          |
| YCR024C-A                                        | PMP1          | YPL256C                 | CLN2          |
| YGR135W                                          | PRE9          | YJL095W                 | BCK1          |
| YJL004C                                          | SYS1          | YAR014C                 | BUD14         |
| YNL325C                                          | FIG4          | YER044C                 | ERG28         |
| YDR080W                                          | VPS41         | YDR153C                 | ENT5          |
| YKR035W-A                                        | DID2          | YJL183W                 | MNN11         |

| Predictions at threshold level 0.80 continued... |               |                         |               |
|--------------------------------------------------|---------------|-------------------------|---------------|
| Gene1 of predicted pair                          |               | Gene2 of predicted pair |               |
| Systematic Name                                  | Standard Name | Systematic Name         | Standard Name |
| YGL087C                                          | MMS2          | YOR195W                 | SLK19         |
| YDR245W                                          | MNN10         | YDL223C                 | HBT1          |
| YHR156C                                          | LIN1          | YLR370C                 | ARC18         |
| YDL192W                                          | ARF1          | YJR033C                 | RAV1          |
| YNL106C                                          | INP52         | YHR013C                 | ARD1          |
| YGR080W                                          | TWF1          | YLR429W                 | CRN1          |
| YAL024C                                          | LTE1          | YER114C                 | BOI2          |
| YBR194W                                          | SOY1          | YDR318W                 | MCM21         |
| YCR024C-A                                        | PMP1          | YKL068W                 | NUP100        |
| YLR371W                                          | ROM2          | YER139C                 | YER139C       |
| YNL236W                                          | SIN4          | YPR046W                 | MCM16         |
| YGR142W                                          | BTN2          | YKR014C                 | YPT52         |
| YLR093C                                          | NYV1          | YGL124C                 | MON1          |
| YOR270C                                          | VPH1          | YGR105W                 | VMA21         |
| YOR124C                                          | UBP2          | YER122C                 | GLO3          |
| YJL095W                                          | BCK1          | YML097C                 | VPS9          |
| YKR061W                                          | KTR2          | YNL248C                 | RPA49         |
| YGL078C                                          | DBP3          | YER139C                 | YER139C       |
| YPL161C                                          | BEM4          | YEL053C                 | MAK10         |
| YNL041C                                          | COG6          | YDL006W                 | PTC1          |
| YPL152W                                          | RRD2          | YNL107W                 | YAF9          |
| YMR198W                                          | CIK1          | YEL056W                 | HAT2          |
| YOR112W                                          | CEX1          | YNL127W                 | FAR11         |
| YLR119W                                          | SRN2          | YGR249W                 | MGA1          |
| YIR003W                                          | YIR003W       | YJL095W                 | BCK1          |
| YHR060W                                          | VMA22         | YLR094C                 | GIS3          |
| YKL116C                                          | PRR1          | YHR200W                 | RPN10         |
| YNL243W                                          | SLA2          | YJR075W                 | HOC1          |
| YBR107C                                          | IML3          | YPL152W                 | RRD2          |

| Predictions at threshold level 0.80 continued... |               |                         |               |
|--------------------------------------------------|---------------|-------------------------|---------------|
| Gene1 of predicted pair                          |               | Gene2 of predicted pair |               |
| Systematic Name                                  | Standard Name | Systematic Name         | Standard Name |
| YDR289C                                          | RTT103        | YGL151W                 | NUT1          |
| YIL159W                                          | BNR1          | YGL033W                 | HOP2          |
| YGR188C                                          | BUB1          | YGL031C                 | RPL24A        |
| YBL008W                                          | HIR1          | YDR146C                 | SWI5          |
| YML001W                                          | YPT7          | YNL076W                 | MKS1          |
| YNR072W                                          | HXT17         | YPL137C                 | GIP3          |
| YIL076W                                          | SEC28         | YLR093C                 | NYV1          |
| YDR153C                                          | ENT5          | YNR006W                 | VPS27         |
| YDL155W                                          | CLB3          | YPL256C                 | CLN2          |
| YDR028C                                          | REG1          | YPR119W                 | CLB2          |
| YKR035W-A                                        | DID2          | YBL025W                 | RRN10         |
| YDR146C                                          | SWI5          | YNL079C                 | TPM1          |
| YGR020C                                          | VMA7          | YEL053C                 | MAK10         |
| YBR194W                                          | SOY1          | YOR080W                 | DIA2          |
| YLR288C                                          | MEC3          | YJR032W                 | CPR7          |
| YGL212W                                          | VAM7          | YFR036W                 | CDC26         |
| YNL199C                                          | GCR2          | YDR310C                 | SUM1          |
| YBL051C                                          | PIN4          | YPL161C                 | BEM4          |
| YLR150W                                          | STM1          | YDL155W                 | CLB3          |
| YPR030W                                          | CSR2          | YEL060C                 | PRB1          |
| YOR109W                                          | INP53         | YPL120W                 | VPS30         |
| YIL053W                                          | RHR2          | YKL048C                 | ELM1          |
| YHR039C-A                                        | VMA10         | YHR081W                 | LRP1          |
| YNL243W                                          | SLA2          | YGR166W                 | KRE11         |
| YFL023W                                          | BUD27         | YFR036W                 | CDC26         |
| YDR174W                                          | HMO1          | YJR063W                 | RPA12         |
| YGR184C                                          | UBR1          | YPL177C                 | CUP9          |
| YBL047C                                          | EDE1          | YBR181C                 | RPS6B         |
| YGR270W                                          | YTA7          | YEL056W                 | HAT2          |



| Predictions at threshold level 0.80 continued... |               |                         |               |
|--------------------------------------------------|---------------|-------------------------|---------------|
| Gene1 of predicted pair                          |               | Gene2 of predicted pair |               |
| Systematic Name                                  | Standard Name | Systematic Name         | Standard Name |
| YLR135W                                          | SLX4          | YOR243C                 | PUS7          |
| YDR174W                                          | HMO1          | YIL036W                 | CST6          |
| YEL009C                                          | GCN4          | YNR023W                 | SNF12         |
| YKR020W                                          | VPS51         | YJL095W                 | BCK1          |
| YJR040W                                          | GEF1          | YPL037C                 | EGD1          |
| YDL184C                                          | RPL41A        | YOR270C                 | VPH1          |
| YCR086W                                          | CSM1          | YJL095W                 | BCK1          |
| YKR020W                                          | VPS51         | YJL006C                 | CTK2          |
| YJL058C                                          | BIT61         | YJR005W                 | APL1          |
| YLR371W                                          | ROM2          | YHR081W                 | LRP1          |
| YPR017C                                          | DSS4          | YHR039C-A               | VMA10         |
| YNL309W                                          | STB1          | YFR040W                 | SAP155        |
| YPL042C                                          | SSN3          | YML016C                 | PPZ1          |
| YMR273C                                          | ZDS1          | YMR125W                 | STO1          |
| YLR254C                                          | NDL1          | YPL018W                 | CTF19         |
| YFR031C-A                                        | RPL2A         | YDR484W                 | VPS52         |
| YBR200W                                          | BEM1          | YBL016W                 | FUS3          |
| YMR039C                                          | SUB1          | YBR195C                 | MSI1          |
| YMR004W                                          | MVP1          | YKR001C                 | VPS1          |
| YJL053W                                          | PEP8          | YGR105W                 | VMA21         |
| YKR020W                                          | VPS51         | YDL047W                 | SIT4          |
| YMR004W                                          | MVP1          | YDL192W                 | ARF1          |
| YBR107C                                          | IML3          | YGL151W                 | NUT1          |
| YNL248C                                          | RPA49         | YCR086W                 | CSM1          |
| YLR320W                                          | MMS22         | YER162C                 | RAD4          |
| YFR032C-A                                        | RPL29         | YPL161C                 | BEM4          |
| YLR292C                                          | SEC72         | YOR358W                 | HAP5          |
| YBR173C                                          | UMP1          | YGL163C                 | RAD54         |
| YPL253C                                          | VIK1          | YNL116W                 | DMA2          |

| Predictions at threshold level 0.80 continued... |               |                         |               |
|--------------------------------------------------|---------------|-------------------------|---------------|
| Gene1 of predicted pair                          |               | Gene2 of predicted pair |               |
| Systematic Name                                  | Standard Name | Systematic Name         | Standard Name |
| YFL023W                                          | BUD27         | YLR441C                 | RPS1A         |
| YDL223C                                          | HBT1          | YCR053W                 | THR4          |
| YNL032W                                          | SIW14         | YOR290C                 | SNF2          |
| YHL020C                                          | OPI1          | YDL006W                 | PTC1          |
| YOR290C                                          | SNF2          | YJR056C                 | YJR056C       |
| YPR046W                                          | MCM16         | YOR141C                 | ARP8          |
| YOR270C                                          | VPH1          | YLR398C                 | SKI2          |
| YOR337W                                          | TEA1          | YHR081W                 | LRP1          |
| YDR153C                                          | ENT5          | YAR014C                 | BUD14         |
| YDR293C                                          | SSD1          | YER068W                 | MOT2          |
| YNR052C                                          | POP2          | YJL187C                 | SWE1          |
| YMR026C                                          | PEX12         | YLR093C                 | NYV1          |
| YDL223C                                          | HBT1          | YLR371W                 | ROM2          |
| YGL124C                                          | MON1          | YOR208W                 | PTP2          |
| YKR020W                                          | VPS51         | YLR370C                 | ARC18         |
| YKL160W                                          | ELF1          | YMR038C                 | CCS1          |
| YKL129C                                          | MYO3          | YOR247W                 | SRL1          |
| YGL212W                                          | VAM7          | YMR216C                 | SKY1          |
| YNL288W                                          | CAF40         | YDR155C                 | CPR1          |
| YHR013C                                          | ARD1          | YHR108W                 | GGA2          |
| YDL160C                                          | DHH1          | YPL178W                 | CBC2          |
| YPL024W                                          | RMI1          | YPR119W                 | CLB2          |
| YLR441C                                          | RPS1A         | YJR032W                 | CPR7          |
| YMR026C                                          | PEX12         | YGL025C                 | PGD1          |
| YBR200W                                          | BEM1          | YNL116W                 | DMA2          |
| YML115C                                          | VAN1          | YGL115W                 | SNF4          |
| YJL006C                                          | CTK2          | YGR188C                 | BUB1          |
| YBR131W                                          | CCZ1          | YKL119C                 | VPH2          |
| YDR144C                                          | MKC7          | YJR032W                 | CPR7          |

| Predictions at threshold level 0.80 continued... |               |                         |               |
|--------------------------------------------------|---------------|-------------------------|---------------|
| Gene1 of predicted pair                          |               | Gene2 of predicted pair |               |
| Systematic Name                                  | Standard Name | Systematic Name         | Standard Name |
| YMR039C                                          | SUB1          | YHR039C-A               | VMA10         |
| YMR172W                                          | HOT1          | YLR360W                 | VPS38         |
| YOR033C                                          | EXO1          | YLR288C                 | MEC3          |
| YIL008W                                          | URM1          | YGL124C                 | MON1          |
| YIR005W                                          | IST3          | YGR188C                 | BUB1          |
| YLR094C                                          | GIS3          | YLR398C                 | SKI2          |
| YBR108W                                          | YBR108W       | YHR016C                 | YSC84         |
| YNR049C                                          | MSO1          | YAL030W                 | SNC1          |
| YIL160C                                          | POT1          | YGL153W                 | PEX14         |
| YDR174W                                          | HMO1          | YLR079W                 | SIC1          |
| YMR116C                                          | ASC1          | YCR086W                 | CSM1          |
| YDL116W                                          | NUP84         | YDR254W                 | CHL4          |
| YDL047W                                          | SIT4          | YNL107W                 | YAF9          |
| YMR216C                                          | SKY1          | YNL127W                 | FAR11         |
| YNL199C                                          | GCR2          | YCR077C                 | PAT1          |
| YGL078C                                          | DBP3          | YMR214W                 | SCJ1          |
| YNL325C                                          | FIG4          | YJR084W                 | CSN12         |
| YDR225W                                          | HTA1          | YLR150W                 | STM1          |
| YDL002C                                          | NHP10         | YLR182W                 | SWI6          |
| YEL009C                                          | GCN4          | YGR104C                 | SRB5          |
| YLR216C                                          | CPR6          | YBR057C                 | MUM2          |
| YML001W                                          | YPT7          | YER139C                 | YER139C       |
| YLR148W                                          | PEP3          | YGL095C                 | VPS45         |
| YPR084W                                          | YPR084W       | YFR010W                 | UBP6          |
| YBL051C                                          | PIN4          | YGR188C                 | BUB1          |
| YFL048C                                          | EMP47         | YER122C                 | GLO3          |
| YFR036W                                          | CDC26         | YOR014W                 | RTS1          |
| YBR200W                                          | BEM1          | YDR289C                 | RTT103        |
| YKR061W                                          | KTR2          | YGR188C                 | BUB1          |

| Predictions at threshold level 0.80 continued... |               |                         |               |
|--------------------------------------------------|---------------|-------------------------|---------------|
| Gene1 of predicted pair                          |               | Gene2 of predicted pair |               |
| Systematic Name                                  | Standard Name | Systematic Name         | Standard Name |
| YDL077C                                          | VAM6          | YLR180W                 | SAM1          |
| YMR055C                                          | BUB2          | YCR031C                 | RPS14A        |
| YOR069W                                          | VPS5          | YEL043W                 | YEL043W       |
| YML103C                                          | NUP188        | YDL059C                 | RAD59         |
| YMR142C                                          | RPL13B        | YPL195W                 | APL5          |
| YLL039C                                          | UBI4          | YNL079C                 | TPM1          |
| YJL176C                                          | SWI3          | YNR023W                 | SNF12         |
| YJL006C                                          | CTK2          | YJL095W                 | BCK1          |
| YBR107C                                          | IML3          | YDR378C                 | LSM6          |
| YBR274W                                          | CHK1          | YLR435W                 | TSR2          |
| YLR216C                                          | CPR6          | YOR208W                 | PTP2          |
| YPL240C                                          | HSP82         | YOR180C                 | DCI1          |
| YKL213C                                          | DOA1          | YOR308C                 | SNU66         |
| YNR052C                                          | POP2          | YHR013C                 | ARD1          |
| YDR443C                                          | SSN2          | YHR205W                 | SCH9          |
| YLR399C                                          | BDF1          | YCR084C                 | TUP1          |
| YNL248C                                          | RPA49         | YJR135C                 | MCM22         |
| YOR290C                                          | SNF2          | YMR311C                 | GLC8          |
| YDL116W                                          | NUP84         | YMR231W                 | PEP5          |
| YLR093C                                          | NYV1          | YML028W                 | TSA1          |
| YMR080C                                          | NAM7          | YCL037C                 | SRO9          |
| YNL032W                                          | SIW14         | YKR099W                 | BAS1          |
| YKR020W                                          | VPS51         | YDR207C                 | UME6          |
| YDR363W-A                                        | SEM1          | YGR270W                 | YTA7          |
| YCR020C-A                                        | MAK31         | YPL120W                 | VPS30         |
| YCL037C                                          | SRO9          | YER122C                 | GLO3          |
| YLR119W                                          | SRN2          | YBL025W                 | RRN10         |
| YLR150W                                          | STM1          | YOR014W                 | RTS1          |
| YDR261C                                          | EXG2          | YMR230W                 | RPS10B        |

| Predictions at threshold level 0.80 continued... |               |                         |               |
|--------------------------------------------------|---------------|-------------------------|---------------|
| Gene1 of predicted pair                          |               | Gene2 of predicted pair |               |
| Systematic Name                                  | Standard Name | Systematic Name         | Standard Name |
| YJL154C                                          | VPS35         | YLR447C                 | VMA6          |
| YOR035C                                          | SHE4          | YDR310C                 | SUM1          |
| YGR135W                                          | PRE9          | YPL018W                 | CTF19         |
| YBR127C                                          | VMA2          | YOR035C                 | SHE4          |
| YKR020W                                          | VPS51         | YDL155W                 | CLB3          |
| YLR337C                                          | VRP1          | YKL129C                 | MYO3          |
| YLR452C                                          | SST2          | YDL077C                 | VAM6          |
| YLR234W                                          | TOP3          | YBR107C                 | IML3          |
| YDL116W                                          | NUP84         | YOR141C                 | ARP8          |
| YMR109W                                          | MYO5          | YJL095W                 | BCK1          |
| YKL034W                                          | TUL1          | YBR082C                 | UBC4          |
| YJR140C                                          | HIR3          | YDL002C                 | NHP10         |
| YLR447C                                          | VMA6          | YDR318W                 | MCM21         |
| YBR217W                                          | ATG12         | YMR214W                 | SCJ1          |
| YNL206C                                          | RTT106        | YPL018W                 | CTF19         |
| YNL215W                                          | IES2          | YJR135C                 | MCM22         |
| YBR173C                                          | UMP1          | YKL139W                 | CTK1          |
| YLR018C                                          | POM34         | YJR090C                 | GRR1          |
| YGR104C                                          | SRB5          | YPL248C                 | GAL4          |
| YPL037C                                          | EGD1          | YDL077C                 | VAM6          |
| YML095C                                          | RAD10         | YOR275C                 | RIM20         |
| YLR381W                                          | CTF3          | YDR254W                 | CHL4          |
| YNL297C                                          | MON2          | YLR309C                 | IMH1          |
| YFR010W                                          | UBP6          | YER116C                 | SLX8          |
| YPL042C                                          | SSN3          | YPL129W                 | TAF14         |
| YDL116W                                          | NUP84         | YGR059W                 | SPR3          |
| YHR081W                                          | LRP1          | YMR230W                 | RPS10B        |
| YBL058W                                          | SHP1          | YER122C                 | GLO3          |
| YPL022W                                          | RAD1          | YHR010W                 | RPL27A        |

| Predictions at threshold level 0.80 continued... |               |                         |               |
|--------------------------------------------------|---------------|-------------------------|---------------|
| Gene1 of predicted pair                          |               | Gene2 of predicted pair |               |
| Systematic Name                                  | Standard Name | Systematic Name         | Standard Name |
| YOR106W                                          | VAM3          | YPL253C                 | VIK1          |
| YGL066W                                          | SGF73         | YBR173C                 | UMP1          |
| YDR146C                                          | SWI5          | YDR456W                 | NHX1          |
| YNL238W                                          | KEX2          | YJR084W                 | CSN12         |
| YDL127W                                          | PCL2          | YKR001C                 | VPS1          |
| YKR061W                                          | KTR2          | YPL018W                 | CTF19         |
| YOR076C                                          | SKI7          | YOR243C                 | PUS7          |
| YDL065C                                          | PEX19         | YLR043C                 | TRX1          |
| YLR337C                                          | VRP1          | YGL087C                 | MMS2          |
| YJL172W                                          | CPS1          | YMR230W                 | RPS10B        |
| YDR443C                                          | SSN2          | YMR214W                 | SCJ1          |
| YJR135C                                          | MCM22         | YLR254C                 | NDL1          |
| YNL087W                                          | TCB2          | YGL003C                 | CDH1          |
| YPL024W                                          | RMI1          | YKL114C                 | APN1          |
| YGR268C                                          | HUA1          | YLR064W                 | YLR064W       |
| YOR096W                                          | RPS7A         | YBL071W-A               | KTI11         |
| YOR290C                                          | SNF2          | YER122C                 | GLO3          |
| YML115C                                          | VAN1          | YDR358W                 | GGA1          |
| YOR069W                                          | VPS5          | YMR216C                 | SKY1          |
| YJL176C                                          | SWI3          | YKR020W                 | VPS51         |
| YBR200W                                          | BEM1          | YML001W                 | YPT7          |
| YBL021C                                          | HAP3          | YPR046W                 | MCM16         |
| YEL065W                                          | SIT1          | YEL053C                 | MAK10         |
| YER120W                                          | SCS2          | YER162C                 | RAD4          |
| YDR179C                                          | CSN9          | YOL117W                 | RRI2          |
| YAL020C                                          | ATS1          | YPR040W                 | TIP41         |
| YJL154C                                          | VPS35         | YJR060W                 | CBF1          |
| YGR261C                                          | APL6          | YML001W                 | YPT7          |
| YAL024C                                          | LTE1          | YJR035W                 | RAD26         |

| Predictions at threshold level 0.80 continued... |               |                         |               |
|--------------------------------------------------|---------------|-------------------------|---------------|
| Gene1 of predicted pair                          |               | Gene2 of predicted pair |               |
| Systematic Name                                  | Standard Name | Systematic Name         | Standard Name |
| YDL116W                                          | NUP84         | YDL047W                 | SIT4          |
| YKL025C                                          | PAN3          | YER110C                 | KAP123        |
| YLL039C                                          | UBI4          | YFR036W                 | CDC26         |
| YKL048C                                          | ELM1          | YOR141C                 | ARP8          |
| YLR337C                                          | VRP1          | YDR378C                 | LSM6          |
| YPL105C                                          | YPL105C       | YAL002W                 | VPS8          |
| YKL139W                                          | CTK1          | YLR386W                 | VAC14         |
| YOR304W                                          | ISW2          | YML099C                 | ARG81         |
| YBR200W                                          | BEM1          | YOR008C                 | SLG1          |
| YLR119W                                          | SRN2          | YNL041C                 | COG6          |
| YHR060W                                          | VMA22         | YLR371W                 | ROM2          |
| YDR155C                                          | CPR1          | YDR310C                 | SUM1          |
| YGR020C                                          | VMA7          | YKR030W                 | GMH1          |
| YER044C                                          | ERG28         | YMR214W                 | SCJ1          |
| YIL053W                                          | RHR2          | YJL095W                 | BCK1          |
| YDR477W                                          | SNF1          | YGL025C                 | PGD1          |
| YDR329C                                          | PEX3          | YNL214W                 | PEX17         |
| YDR293C                                          | SSD1          | YOR106W                 | VAM3          |
| YAL024C                                          | LTE1          | YIL034C                 | CAP2          |
| YIL076W                                          | SEC28         | YGR020C                 | VMA7          |
| YLR441C                                          | RPS1A         | YBR171W                 | SEC66         |
| YDR293C                                          | SSD1          | YNL206C                 | RTT106        |
| YLR386W                                          | VAC14         | YOR127W                 | RGA1          |
| YMR153W                                          | NUP53         | YMR152W                 | YIM1          |
| YCR031C                                          | RPS14A        | YLR350W                 | ORM2          |
| YBR036C                                          | CSG2          | YEL060C                 | PRB1          |
| YPR171W                                          | BSP1          | YER118C                 | SHO1          |
| YKR072C                                          | SIS2          | YLR234W                 | TOP3          |
| YKL116C                                          | PRR1          | YPR036W                 | VMA13         |

| Predictions at threshold level 0.80 continued... |               |                         |               |
|--------------------------------------------------|---------------|-------------------------|---------------|
| Gene1 of predicted pair                          |               | Gene2 of predicted pair |               |
| Systematic Name                                  | Standard Name | Systematic Name         | Standard Name |
| YOR127W                                          | RGA1          | YJL187C                 | SWE1          |
| YMR198W                                          | CIK1          | YER118C                 | SHO1          |
| YIL076W                                          | SEC28         | YOR290C                 | SNF2          |
| YBR173C                                          | UMP1          | YCR053W                 | THR4          |
| YGL153W                                          | PEX14         | YCR077C                 | PAT1          |
| YGL190C                                          | CDC55         | YER016W                 | BIM1          |
| YJL127C                                          | SPT10         | YPR046W                 | MCM16         |
| YDR261C                                          | EXG2          | YLR398C                 | SKI2          |
| YLR386W                                          | VAC14         | YBR019C                 | GAL10         |
| YDL116W                                          | NUP84         | YGL252C                 | RTG2          |
| YDL083C                                          | RPS16B        | YJR084W                 | CSN12         |
| YNL236W                                          | SIN4          | YPL248C                 | GAL4          |
| YBR173C                                          | UMP1          | YJL172W                 | CPS1          |
| YDL223C                                          | HBT1          | YDR358W                 | GGA1          |
| YJR140C                                          | HIR3          | YLR182W                 | SWI6          |
| YKL139W                                          | CTK1          | YDL005C                 | MED2          |
| YNL199C                                          | GCR2          | YPL161C                 | BEM4          |
| YDR244W                                          | PEX5          | YDR265W                 | PEX10         |
| YAR018C                                          | KIN3          | YBL106C                 | SRO77         |
| YDR137W                                          | RGP1          | YPL137C                 | GIP3          |
| YAL024C                                          | LTE1          | YBL058W                 | SHP1          |
| YML001W                                          | YPT7          | YMR311C                 | GLC8          |
| YBL047C                                          | EDE1          | YDL155W                 | CLB3          |
| YMR153W                                          | NUP53         | YOR358W                 | HAP5          |
| YDR318W                                          | MCM21         | YNL225C                 | CNM67         |
| YIL002C                                          | INP51         | YOR035C                 | SHE4          |
| YIL053W                                          | RHR2          | YMR095C                 | SNO1          |
| YER162C                                          | RAD4          | YBR019C                 | GAL10         |
| YMR164C                                          | MSS11         | YER110C                 | KAP123        |



| Predictions at threshold level 0.80 continued... |               |                         |               |
|--------------------------------------------------|---------------|-------------------------|---------------|
| Gene1 of predicted pair                          |               | Gene2 of predicted pair |               |
| Systematic Name                                  | Standard Name | Systematic Name         | Standard Name |
| YBR108W                                          | YBR108W       | YHR081W                 | LRP1          |
| YMR095C                                          | SNO1          | YJR056C                 | YJR056C       |
| YHR073W                                          | OSH3          | YKR024C                 | DBP7          |
| YNL199C                                          | GCR2          | YER049W                 | TPA1          |
| YGL147C                                          | RPL9A         | YGL124C                 | MON1          |
| YMR055C                                          | BUB2          | YKL048C                 | ELM1          |
| YER162C                                          | RAD4          | YLR032W                 | RAD5          |
| YGL087C                                          | MMS2          | YOR023C                 | AHC1          |
| YEL053C                                          | MAK10         | YJL095W                 | BCK1          |
| YDR174W                                          | HMO1          | YDR335W                 | MSN5          |
| YDL161W                                          | ENT1          | YOR036W                 | PEP12         |
| YPL042C                                          | SSN3          | YOR141C                 | ARP8          |
| YNL135C                                          | FPR1          | YNL248C                 | RPA49         |
| YNL069C                                          | RPL16B        | YJR033C                 | RAV1          |
| YBL008W                                          | HIR1          | YLR234W                 | TOP3          |
| YHL020C                                          | OPI1          | YEL043W                 | YEL043W       |
| YLR370C                                          | ARC18         | YCR053W                 | THR4          |
| YFR010W                                          | UBP6          | YGL003C                 | CDH1          |
| YJL029C                                          | VPS53         | YMR231W                 | PEP5          |
| YMR198W                                          | CIK1          | YBR107C                 | IML3          |
| YDR080W                                          | VPS41         | YJL004C                 | SYS1          |
| YDR129C                                          | SAC6          | YJL095W                 | BCK1          |
| YLR254C                                          | NDL1          | YNL107W                 | YAF9          |
| YGR261C                                          | APL6          | YLR360W                 | VPS38         |
| YPL037C                                          | EGD1          | YNL238W                 | KEX2          |
| YMR198W                                          | CIK1          | YDL226C                 | GCS1          |
| YGR040W                                          | KSS1          | YDL159W                 | STE7          |
| YCR081W                                          | SRB8          | YHR012W                 | VPS29         |
| YKR059W                                          | TIF1          | YOR368W                 | RAD17         |

| Predictions at threshold level 0.80 continued... |               |                         |               |
|--------------------------------------------------|---------------|-------------------------|---------------|
| Gene1 of predicted pair                          |               | Gene2 of predicted pair |               |
| Systematic Name                                  | Standard Name | Systematic Name         | Standard Name |
| YLR090W                                          | XDJ1          | YGL212W                 | VAM7          |
| YBL008W                                          | HIR1          | YBR215W                 | HPC2          |
| YBR107C                                          | IML3          | YHR115C                 | DMA1          |
| YIL076W                                          | SEC28         | YDR310C                 | SUM1          |
| YDR383C                                          | NKP1          | YNL307C                 | MCK1          |
| YNL032W                                          | SIW14         | YLR094C                 | GIS3          |
| YML016C                                          | PPZ1          | YHR013C                 | ARD1          |
| YHR178W                                          | STB5          | YCR031C                 | RPS14A        |
| YHR134W                                          | WSS1          | YPL022W                 | RAD1          |
| YDL155W                                          | CLB3          | YGL151W                 | NUT1          |
| YOR140W                                          | SFL1          | YLR371W                 | ROM2          |
| YOR043W                                          | WHI2          | YER139C                 | YER139C       |
| YDR335W                                          | MSN5          | YKL213C                 | DOA1          |
| YBL008W                                          | HIR1          | YPL129W                 | TAF14         |
| YER144C                                          | UBP5          | YDR137W                 | RGP1          |
| YDR202C                                          | RAV2          | YPL120W                 | VPS30         |
| YLR447C                                          | VMA6          | YDR310C                 | SUM1          |
| YGR270W                                          | YTA7          | YOR308C                 | SNU66         |
| YNL069C                                          | RPL16B        | YCL037C                 | SRO9          |
| YOR275C                                          | RIM20         | YKL161C                 | YKL161C       |
| YJL036W                                          | SNX4          | YMR004W                 | MVP1          |
| YDR105C                                          | TMS1          | YKR093W                 | PTR2          |
| YGL147C                                          | RPL9A         | YML001W                 | YPT7          |
| YPR018W                                          | RLF2          | YJR060W                 | CBF1          |
| YGL223C                                          | COG1          | YOL018C                 | TLG2          |
| YOR270C                                          | VPH1          | YPR036W                 | VMA13         |
| YJR056C                                          | YJR056C       | YER122C                 | GLO3          |
| YLR095C                                          | IOC2          | YGL124C                 | MON1          |
| YPL042C                                          | SSN3          | YBR089C-A               | NHP6B         |

| Predictions at threshold level 0.80 continued... |               |                         |               |
|--------------------------------------------------|---------------|-------------------------|---------------|
| Gene1 of predicted pair                          |               | Gene2 of predicted pair |               |
| Systematic Name                                  | Standard Name | Systematic Name         | Standard Name |
| YMR142C                                          | RPL13B        | YHR060W                 | VMA22         |
| YPL220W                                          | RPL1A         | YNL147W                 | LSM7          |
| YML016C                                          | PPZ1          | YGL253W                 | HXK2          |
| YBR215W                                          | HPC2          | YPL018W                 | CTF19         |
| YML115C                                          | VAN1          | YBR200W                 | BEM1          |
| YBL047C                                          | EDE1          | YKR014C                 | YPT52         |
| YLR360W                                          | VPS38         | YCR066W                 | RAD18         |
| YBR239C                                          | YBR239C       | YLR144C                 | ACF2          |
| YMR133W                                          | REC114        | YBR019C                 | GAL10         |
| YNL044W                                          | YIP3          | YGL198W                 | YIP4          |
| YCR066W                                          | RAD18         | YNR032W                 | PPG1          |
| YLR095C                                          | IOC2          | YIL076W                 | SEC28         |
| YDL020C                                          | RPN4          | YGR019W                 | UGA1          |
| YBR217W                                          | ATG12         | YGL212W                 | VAM7          |
| YPL253C                                          | VIK1          | YHR012W                 | VPS29         |
| YGL087C                                          | MMS2          | YPL253C                 | VIK1          |
| YJR135C                                          | MCM22         | YLR182W                 | SWI6          |
| YMR253C                                          | YMR253C       | YKR030W                 | GMH1          |
| YNL106C                                          | INP52         | YIR005W                 | IST3          |
| YOR195W                                          | SLK19         | YLR102C                 | APC9          |
| YOL090W                                          | MSH2          | YDR207C                 | UME6          |
| YDR378C                                          | LSM6          | YGL153W                 | PEX14         |
| YLR083C                                          | EMP70         | YJL053W                 | PEP8          |
| YLR337C                                          | VRP1          | YFR040W                 | SAP155        |
| YPL022W                                          | RAD1          | YNL248C                 | RPA49         |
| YPR101W                                          | SNT309        | YNL147W                 | LSM7          |
| YGL133W                                          | ITC1          | YHR115C                 | DMA1          |
| YBR217W                                          | ATG12         | YBL078C                 | ATG8          |
| YDR004W                                          | RAD57         | YNL307C                 | MCK1          |

| Predictions at threshold level 0.80 continued... |               |                         |               |
|--------------------------------------------------|---------------|-------------------------|---------------|
| Gene1 of predicted pair                          |               | Gene2 of predicted pair |               |
| Systematic Name                                  | Standard Name | Systematic Name         | Standard Name |
| YDR477W                                          | SNF1          | YBR200W                 | BEM1          |
| YOL147C                                          | PEX11         | YPR119W                 | CLB2          |
| YBL102W                                          | SFT2          | YDL006W                 | PTC1          |
| YOR066W                                          | MSA1          | YLR093C                 | NYV1          |
| YGR020C                                          | VMA7          | YPL234C                 | TFP3          |
| YBL103C                                          | RTG3          | YKR048C                 | NAP1          |
| YJR032W                                          | CPR7          | YDR207C                 | UME6          |
| YBR194W                                          | SOY1          | YCR086W                 | CSM1          |
| YDL059C                                          | RAD59         | YLR352W                 | YLR352W       |
| YMR202W                                          | ERG2          | YOL018C                 | TLG2          |
| YDR443C                                          | SSN2          | YIL076W                 | SEC28         |
| YCR065W                                          | HCM1          | YNL206C                 | RTT106        |
| YKL048C                                          | ELM1          | YDR155C                 | CPR1          |
| YHR152W                                          | SPO12         | YIL008W                 | URM1          |
| YBR240C                                          | THI2          | YKL160W                 | ELF1          |
| YLR095C                                          | IOC2          | YMR026C                 | PEX12         |
| YLR399C                                          | BDF1          | YBR009C                 | HHF1          |
| YHL031C                                          | GOS1          | YOL018C                 | TLG2          |
| YDR477W                                          | SNF1          | YDR137W                 | RGP1          |
| YGL133W                                          | ITC1          | YBL047C                 | EDE1          |
| YBR274W                                          | CHK1          | YCR031C                 | RPS14A        |
| YEL009C                                          | GCN4          | YLR357W                 | RSC2          |
| YJL183W                                          | MNN11         | YAL002W                 | VPS8          |
| YGR238C                                          | KEL2          | YHR158C                 | KEL1          |
| YPL161C                                          | BEM4          | YAR014C                 | BUD14         |
| YEL065W                                          | SIT1          | YGR249W                 | MGA1          |
| YEL053C                                          | MAK10         | YOL067C                 | RTG1          |
| YCL037C                                          | SRO9          | YJL187C                 | SWE1          |
| YPR084W                                          | YPR084W       | YGL115W                 | SNF4          |

| Predictions at threshold level 0.80 continued... |               |                         |               |
|--------------------------------------------------|---------------|-------------------------|---------------|
| Gene1 of predicted pair                          |               | Gene2 of predicted pair |               |
| Systematic Name                                  | Standard Name | Systematic Name         | Standard Name |
| YLR150W                                          | STM1          | YPR046W                 | MCM16         |
| YBR119W                                          | MUD1          | YKL074C                 | MUD2          |
| YHR152W                                          | SPO12         | YDR363W-A               | SEM1          |
| YGL054C                                          | ERV14         | YMR054W                 | STV1          |
| YMR172W                                          | HOT1          | YJR090C                 | GRR1          |
| YLR292C                                          | SEC72         | YGL253W                 | HXK2          |
| YKL048C                                          | ELM1          | YOR035C                 | SHE4          |
| YMR198W                                          | CIK1          | YJL124C                 | LSM1          |
| YBR171W                                          | SEC66         | YNL076W                 | MKS1          |
| YGL174W                                          | BUD13         | YLR350W                 | ORM2          |
| YNL248C                                          | RPA49         | YDL013W                 | SLX5          |
| YPL024W                                          | RMI1          | YPL195W                 | APL5          |
| YNL106C                                          | INP52         | YDL192W                 | ARF1          |
| YLR018C                                          | POM34         | YOL126C                 | MDH2          |
| YML115C                                          | VAN1          | YGL124C                 | MON1          |
| YDR129C                                          | SAC6          | YKL126W                 | YPK1          |
| YCL037C                                          | SRO9          | YHR077C                 | NMD2          |
| YBR108W                                          | YBR108W       | YEL056W                 | HAT2          |
| YML103C                                          | NUP188        | YLR410W                 | VIP1          |
| YLR191W                                          | PEX13         | YML035C                 | AMD1          |
| YMR109W                                          | MYO5          | YAR014C                 | BUD14         |
| YMR133W                                          | REC114        | YER122C                 | GLO3          |
| YOR290C                                          | SNF2          | YDR207C                 | UME6          |
| YDR448W                                          | ADA2          | YFL031W                 | HAC1          |
| YOR001W                                          | RRP6          | YDL002C                 | NHP10         |
| YDR329C                                          | PEX3          | YMR026C                 | PEX12         |
| YOL067C                                          | RTG1          | YOL108C                 | INO4          |
| YGR261C                                          | APL6          | YPR051W                 | MAK3          |
| YGR072W                                          | UPF3          | YDL077C                 | VAM6          |

| Predictions at threshold level 0.80 continued... |               |                         |               |
|--------------------------------------------------|---------------|-------------------------|---------------|
| Gene1 of predicted pair                          |               | Gene2 of predicted pair |               |
| Systematic Name                                  | Standard Name | Systematic Name         | Standard Name |
| YDR477W                                          | SNF1          | YHR200W                 | RPN10         |
| YER110C                                          | KAP123        | YBR017C                 | KAP104        |
| YNL054W                                          | VAC7          | YDR318W                 | MCM21         |
| YDR289C                                          | RTT103        | YBR036C                 | CSG2          |
| YDR245W                                          | MNN10         | YDR335W                 | MSN5          |
| YBL058W                                          | SHP1          | YDL184C                 | RPL41A        |
| YML016C                                          | PPZ1          | YMR167W                 | MLH1          |
| YIL076W                                          | SEC28         | YDR108W                 | GSG1          |
| YLR095C                                          | IOC2          | YKL139W                 | CTK1          |
| YOR032C                                          | HMS1          | YNL289W                 | PCL1          |
| YPL105C                                          | YPL105C       | YNL127W                 | FAR11         |
| YOL051W                                          | GAL11         | YGL151W                 | NUT1          |
| YGL190C                                          | CDC55         | YMR048W                 | CSM3          |
| YNL106C                                          | INP52         | YGR188C                 | BUB1          |
| YOR327C                                          | SNC2          | YEL060C                 | PRB1          |
| YGR104C                                          | SRB5          | YGL025C                 | PGD1          |
| YOL126C                                          | MDH2          | YMR199W                 | CLN1          |
| YEL044W                                          | IES6          | YNL079C                 | TPM1          |
| YDR477W                                          | SNF1          | YLR452C                 | SST2          |
| YDL223C                                          | HBT1          | YMR214W                 | SCJ1          |
| YDL002C                                          | NHP10         | YGL163C                 | RAD54         |
| YLR386W                                          | VAC14         | YBL051C                 | PIN4          |
| YLR292C                                          | SEC72         | YEL056W                 | HAT2          |
| YPL129W                                          | TAF14         | YPL248C                 | GAL4          |
| YBL016W                                          | FUS3          | YPL256C                 | CLN2          |
| YNL215W                                          | IES2          | YPL001W                 | HAT1          |
| YBR217W                                          | ATG12         | YLR452C                 | SST2          |
| YLR386W                                          | VAC14         | YLR371W                 | ROM2          |
| YGR129W                                          | SYF2          | YMR216C                 | SKY1          |

| Predictions at threshold level 0.80 continued... |               |                         |               |
|--------------------------------------------------|---------------|-------------------------|---------------|
| Gene1 of predicted pair                          |               | Gene2 of predicted pair |               |
| Systematic Name                                  | Standard Name | Systematic Name         | Standard Name |
| YFR034C                                          | PHO4          | YGR233C                 | PHO81         |
| YJL006C                                          | CTK2          | YAR014C                 | BUD14         |
| YBR019C                                          | GAL10         | YER139C                 | YER139C       |
| YGR108W                                          | CLB1          | YBR171W                 | SEC66         |
| YMR164C                                          | MSS11         | YPL246C                 | RBD2          |
| YDL020C                                          | RPN4          | YJL095W                 | BCK1          |
| YAL051W                                          | OAF1          | YDR289C                 | RTT103        |
| YBR200W                                          | BEM1          | YKR048C                 | NAP1          |
| YMR095C                                          | SNO1          | YDL083C                 | RPS16B        |
| YPL161C                                          | BEM4          | YER049W                 | TPA1          |
| YMR198W                                          | CIK1          | YDR363W-A               | SEM1          |
| YLR447C                                          | VMA6          | YPL161C                 | BEM4          |
| YPL001W                                          | HAT1          | YOR043W                 | WHI2          |
| YBR217W                                          | ATG12         | YEL053C                 | MAK10         |
| YBL058W                                          | SHP1          | YMR311C                 | GLC8          |
| YNL206C                                          | RTT106        | YOL081W                 | IRA2          |
| YDR245W                                          | MNN10         | YPL050C                 | MNN9          |
| YBL058W                                          | SHP1          | YJL172W                 | CPS1          |
| YPR120C                                          | CLB5          | YGL163C                 | RAD54         |
| YLR135W                                          | SLX4          | YJL187C                 | SWE1          |
| YDR363W-A                                        | SEM1          | YLR429W                 | CRN1          |
| YBL008W                                          | HIR1          | YNL215W                 | IES2          |
| YNL248C                                          | RPA49         | YJR060W                 | CBF1          |
| YDR484W                                          | VPS52         | YDR310C                 | SUM1          |
| YPL115C                                          | BEM3          | YIL034C                 | CAP2          |
| YPL024W                                          | RMI1          | YMR153W                 | NUP53         |
| YDL020C                                          | RPN4          | YLR381W                 | CTF3          |
| YPL037C                                          | EGD1          | YPL137C                 | GIP3          |
| YGL153W                                          | PEX14         | YKL041W                 | VPS24         |

| Predictions at threshold level 0.80 continued... |               |                         |               |
|--------------------------------------------------|---------------|-------------------------|---------------|
| Gene1 of predicted pair                          |               | Gene2 of predicted pair |               |
| Systematic Name                                  | Standard Name | Systematic Name         | Standard Name |
| YPL195W                                          | APL5          | YNL127W                 | FAR11         |
| YGL115W                                          | SNF4          | YBR036C                 | CSG2          |
| YPL024W                                          | RMI1          | YMR142C                 | RPL13B        |
| YLR360W                                          | VPS38         | YLR371W                 | ROM2          |
| YNL206C                                          | RTT106        | YKR057W                 | RPS21A        |
| YOR270C                                          | VPH1          | YJR032W                 | CPR7          |
| YDL223C                                          | HBT1          | YER162C                 | RAD4          |
| YBR200W                                          | BEM1          | YNL238W                 | KEX2          |
| YNL325C                                          | FIG4          | YDL192W                 | ARF1          |
| YCL067C                                          | HMLALPHA2     | YER167W                 | BCK2          |
| YMR095C                                          | SNO1          | YMR133W                 | REC114        |
| YNL325C                                          | FIG4          | YHR060W                 | VMA22         |
| YNL053W                                          | MSG5          | YPL240C                 | HSP82         |
| YOR035C                                          | SHE4          | YGL124C                 | MON1          |
| YML016C                                          | PPZ1          | YBR119W                 | MUD1          |
| YFR010W                                          | UBP6          | YDR207C                 | UME6          |
| YEL065W                                          | SIT1          | YIL076W                 | SEC28         |
| YJL117W                                          | PHO86         | YLR320W                 | MMS22         |
| YNL106C                                          | INP52         | YDR358W                 | GGA1          |
| YKL010C                                          | UFD4          | YMR224C                 | MRE11         |
| YDR320C                                          | SWA2          | YNL051W                 | COG5          |
| YFL023W                                          | BUD27         | YER040W                 | GLN3          |
| YFL013C                                          | IES1          | YER122C                 | GLO3          |
| YGL033W                                          | HOP2          | YNL087W                 | TCB2          |
| YBR057C                                          | MUM2          | YDR245W                 | MNN10         |
| YBR278W                                          | DPB3          | YCR086W                 | CSM1          |
| YJR032W                                          | CPR7          | YLR370C                 | ARC18         |
| YJL095W                                          | BCK1          | YDL047W                 | SIT4          |
| YIL076W                                          | SEC28         | YBR030W                 | YBR030W       |



| Predictions at threshold level 0.80 continued... |               |                         |               |
|--------------------------------------------------|---------------|-------------------------|---------------|
| Gene1 of predicted pair                          |               | Gene2 of predicted pair |               |
| Systematic Name                                  | Standard Name | Systematic Name         | Standard Name |
| YMR095C                                          | SNO1          | YBR200W                 | BEM1          |
| YMR224C                                          | MRE11         | YNL032W                 | SIW14         |
| YBR031W                                          | RPL4A         | YGR100W                 | MDR1          |
| YGL078C                                          | DBP3          | YMR142C                 | RPL13B        |
| YDR335W                                          | MSN5          | YDR254W                 | CHL4          |
| YNL058C                                          | YNL058C       | YHR039C-A               | VMA10         |
| YOR069W                                          | VPS5          | YNL297C                 | MON2          |
| YBR108W                                          | YBR108W       | YBR019C                 | GAL10         |
| YCL037C                                          | SRO9          | YMR038C                 | CCS1          |
| YPL234C                                          | TFP3          | YKR030W                 | GMH1          |
| YKR099W                                          | BAS1          | YML001W                 | YPT7          |
| YBR228W                                          | SLX1          | YJL187C                 | SWE1          |
| YHR149C                                          | SKG6          | YML109W                 | ZDS2          |
| YBR107C                                          | IML3          | YPL161C                 | BEM4          |
| YLR083C                                          | EMP70         | YOR327C                 | SNC2          |
| YER110C                                          | KAP123        | YIL008W                 | URM1          |
| YCR088W                                          | ABP1          | YKR020W                 | VPS51         |
| YMR224C                                          | MRE11         | YKL041W                 | VPS24         |
| YIL159W                                          | BNR1          | YGL212W                 | VAM7          |
| YIL159W                                          | BNR1          | YBL103C                 | RTG3          |
| YGL163C                                          | RAD54         | YML112W                 | CTK3          |
| YIL148W                                          | RPL40A        | YKL068W                 | NUP100        |
| YKR072C                                          | SIS2          | YGR081C                 | SLX9          |
| YCR053W                                          | THR4          | YMR214W                 | SCJ1          |
| YNL107W                                          | YAF9          | YLR350W                 | ORM2          |
| YMR224C                                          | MRE11         | YPL213W                 | LEA1          |
| YDL002C                                          | NHP10         | YOR038C                 | HIR2          |
| YPR189W                                          | SKI3          | YNR052C                 | POP2          |
| YIL076W                                          | SEC28         | YMR038C                 | CCS1          |

| Predictions at threshold level 0.80 continued... |               |                         |               |
|--------------------------------------------------|---------------|-------------------------|---------------|
| Gene1 of predicted pair                          |               | Gene2 of predicted pair |               |
| Systematic Name                                  | Standard Name | Systematic Name         | Standard Name |
| YKL025C                                          | PAN3          | YMR127C                 | SAS2          |
| YDR202C                                          | RAV2          | YBR127C                 | VMA2          |
| YOR337W                                          | TEA1          | YOR270C                 | VPH1          |
| YDR289C                                          | RTT103        | YGL148W                 | ARO2          |
| YDR443C                                          | SSN2          | YER144C                 | UBP5          |
| YFR031C-A                                        | RPL2A         | YGR261C                 | APL6          |
| YHR081W                                          | LRP1          | YJR084W                 | CSN12         |
| YBR217W                                          | ATG12         | YLR371W                 | ROM2          |
| YJR060W                                          | CBF1          | YML001W                 | YPT7          |
| YDL116W                                          | NUP84         | YKR095W                 | MLP1          |
| YPR036W                                          | VMA13         | YML028W                 | TSA1          |
| YMR216C                                          | SKY1          | YNL051W                 | COG5          |
| YBL008W                                          | HIR1          | YDL226C                 | GCS1          |
| YDR174W                                          | HMO1          | YNL225C                 | CNM67         |
| YCR020C-A                                        | MAK31         | YDR207C                 | UME6          |
| YKR001C                                          | VPS1          | YEL056W                 | HAT2          |
| YKL116C                                          | PRR1          | YDR477W                 | SNF1          |
| YIL034C                                          | CAP2          | YCR086W                 | CSM1          |
| YGR252W                                          | GCN5          | YFL031W                 | HAC1          |
| YML115C                                          | VAN1          | YPL161C                 | BEM4          |
| YML103C                                          | NUP188        | YBL079W                 | NUP170        |
| YJL183W                                          | MNN11         | YDL077C                 | VAM6          |
| YPL024W                                          | RMI1          | YBR200W                 | BEM1          |
| YBL008W                                          | HIR1          | YJR140C                 | HIR3          |
| YBR273C                                          | UBX7          | YKL213C                 | DOA1          |
| YPR046W                                          | MCM16         | YMR311C                 | GLC8          |
| YFR031C-A                                        | RPL2A         | YDR477W                 | SNF1          |
| YAL024C                                          | LTE1          | YOR127W                 | RGA1          |
| YLR090W                                          | XDJ1          | YPL195W                 | APL5          |

| Predictions at threshold level 0.80 continued... |               |                         |               |
|--------------------------------------------------|---------------|-------------------------|---------------|
| Gene1 of predicted pair                          |               | Gene2 of predicted pair |               |
| Systematic Name                                  | Standard Name | Systematic Name         | Standard Name |
| YPL024W                                          | RMI1          | YMR214W                 | SCJ1          |
| YGL163C                                          | RAD54         | YDR318W                 | MCM21         |
| YOL111C                                          | MDY2          | YBR280C                 | SAF1          |
| YDL185W                                          | TFP1          | YDR289C                 | RTT103        |
| YML095C                                          | RAD10         | YDR207C                 | UME6          |
| YGR270W                                          | YTA7          | YJL183W                 | MNN11         |
| YJL154C                                          | VPS35         | YPR051W                 | MAK3          |
| YLR399C                                          | BDF1          | YLR357W                 | RSC2          |
| YOR127W                                          | RGA1          | YPL161C                 | BEM4          |
| YPL253C                                          | VIK1          | YIL008W                 | URM1          |
| YHR134W                                          | WSS1          | YBL051C                 | PIN4          |
| YFR031C-A                                        | RPL2A         | YCL001W                 | RER1          |
| YDL077C                                          | VAM6          | YER122C                 | GLO3          |
| YDL020C                                          | RPN4          | YBR171W                 | SEC66         |
| YBL103C                                          | RTG3          | YJR056C                 | YJR056C       |
| YPL180W                                          | TCO89         | YER118C                 | SHO1          |
| YOR112W                                          | CEX1          | YPL161C                 | BEM4          |
| YHL031C                                          | GOS1          | YGR105W                 | VMA21         |
| YMR284W                                          | YKU70         | YML028W                 | TSA1          |
| YGR249W                                          | MGA1          | YOL121C                 | RPS19A        |
| YPR036W                                          | VMA13         | YEL027W                 | CUP5          |
| YKL101W                                          | HSL1          | YCR031C                 | RPS14A        |
| YGR104C                                          | SRB5          | YBR112C                 | CYC8          |
| YBR215W                                          | HPC2          | YDR289C                 | RTT103        |
| YOR332W                                          | VMA4          | YEL027W                 | CUP5          |
| YOR043W                                          | WHI2          | YMR311C                 | GLC8          |
| YPL049C                                          | DIG1          | YBL016W                 | FUS3          |
| YJL176C                                          | SWI3          | YLR061W                 | RPL22A        |
| YPL024W                                          | RMI1          | YJR035W                 | RAD26         |

| Predictions at threshold level 0.80 continued... |               |                         |               |
|--------------------------------------------------|---------------|-------------------------|---------------|
| Gene1 of predicted pair                          |               | Gene2 of predicted pair |               |
| Systematic Name                                  | Standard Name | Systematic Name         | Standard Name |
| YER139C                                          | YER139C       | YHR167W                 | THP2          |
| YGL212W                                          | VAM7          | YGL124C                 | MON1          |
| YKL110C                                          | KTI12         | YOL081W                 | IRA2          |
| YFL023W                                          | BUD27         | YDR137W                 | RGP1          |
| YKL007W                                          | CAP1          | YHR012W                 | VPS29         |
| YDR137W                                          | RGP1          | YMR133W                 | REC114        |
| YDR383C                                          | NKP1          | YLR410W                 | VIP1          |
| YMR042W                                          | ARG80         | YJR094C                 | IME1          |
| YBR171W                                          | SEC66         | YGR054W                 | YGR054W       |
| YNL051W                                          | COG5          | YDR310C                 | SUM1          |
| YFR040W                                          | SAP155        | YLR370C                 | ARC18         |
| YJL058C                                          | BIT61         | YDL226C                 | GCS1          |
| YHR156C                                          | LIN1          | YDR207C                 | UME6          |
| YML059C                                          | NTE1          | YJR025C                 | BNA1          |
| YER068W                                          | MOT2          | YOR064C                 | YNG1          |
| YOR109W                                          | INP53         | YPL195W                 | APL5          |
| YCR020C-A                                        | MAK31         | YDR310C                 | SUM1          |
| YGL200C                                          | EMP24         | YDL006W                 | PTC1          |
| YLR234W                                          | TOP3          | YBL019W                 | APN2          |
| YGL223C                                          | COG1          | YOL112W                 | MSB4          |
| YFR031C-A                                        | RPL2A         | YOL108C                 | INO4          |
| YLR386W                                          | VAC14         | YHR111W                 | UBA4          |
| YLR315W                                          | NKP2          | YCR086W                 | CSM1          |
| YDR320C                                          | SWA2          | YJR060W                 | CBF1          |
| YER116C                                          | SLX8          | YKL126W                 | YPK1          |
| YDL192W                                          | ARF1          | YKL119C                 | VPH2          |
| YOR043W                                          | WHI2          | YGL148W                 | ARO2          |
| YGL212W                                          | VAM7          | YMR054W                 | STV1          |
| YDR174W                                          | HMO1          | YIR005W                 | IST3          |

| Predictions at threshold level 0.80 continued... |               |                         |               |
|--------------------------------------------------|---------------|-------------------------|---------------|
| Gene1 of predicted pair                          |               | Gene2 of predicted pair |               |
| Systematic Name                                  | Standard Name | Systematic Name         | Standard Name |
| YLR381W                                          | CTF3          | YHL002W                 | HSE1          |
| YKR020W                                          | VPS51         | YBL101C                 | ECM21         |
| YER016W                                          | BIM1          | YER105C                 | NUP157        |
| YDL192W                                          | ARF1          | YOR036W                 | PEP12         |
| YPR046W                                          | MCM16         | YHR114W                 | BZZ1          |
| YEL043W                                          | YEL043W       | YPL234C                 | TFP3          |
| YPR052C                                          | NHP6A         | YNR052C                 | POP2          |
| YPR084W                                          | YPR084W       | YNL107W                 | YAF9          |
| YOR001W                                          | RRP6          | YJR060W                 | CBF1          |
| YEL065W                                          | SIT1          | YMR152W                 | YIM1          |
| YPR051W                                          | MAK3          | YJR040W                 | GEF1          |
| YML115C                                          | VAN1          | YDL006W                 | PTC1          |
| YHR156C                                          | LIN1          | YOR270C                 | VPH1          |
| YKR059W                                          | TIF1          | YMR167W                 | MLH1          |
| YOR106W                                          | VAM3          | YLR425W                 | TUS1          |
| YDL002C                                          | NHP10         | YDR335W                 | MSN5          |
| YPR040W                                          | TIP41         | YKR020W                 | VPS51         |
| YEL065W                                          | SIT1          | YKL126W                 | YPK1          |
| YHR119W                                          | SET1          | YLR418C                 | CDC73         |
| YDR490C                                          | PKH1          | YMR104C                 | YPK2          |
| YML115C                                          | VAN1          | YDR207C                 | UME6          |
| YNL206C                                          | RTT106        | YDL013W                 | SLX5          |
| YKR001C                                          | VPS1          | YNL051W                 | COG5          |
| YDR383C                                          | NKP1          | YGR270W                 | YTA7          |
| YER120W                                          | SCS2          | YDR207C                 | UME6          |
| YCL037C                                          | SRO9          | YLR309C                 | IMH1          |
| YDL077C                                          | VAM6          | YMR214W                 | SCJ1          |
| YOR327C                                          | SNC2          | YJR084W                 | CSN12         |
| YJR058C                                          | APS2          | YJR005W                 | APL1          |

| Predictions at threshold level 0.80 continued... |               |                         |               |
|--------------------------------------------------|---------------|-------------------------|---------------|
| Gene1 of predicted pair                          |               | Gene2 of predicted pair |               |
| Systematic Name                                  | Standard Name | Systematic Name         | Standard Name |
| YNL051W                                          | COG5          | YAR014C                 | BUD14         |
| YNL325C                                          | FIG4          | YOL111C                 | MDY2          |
| YEL053C                                          | MAK10         | YGL124C                 | MON1          |
| YDR443C                                          | SSN2          | YBR280C                 | SAF1          |
| YKL007W                                          | CAP1          | YGL252C                 | RTG2          |
| YLR079W                                          | SIC1          | YOR141C                 | ARP8          |
| YDR076W                                          | RAD55         | YGR188C                 | BUB1          |
| YOL111C                                          | MDY2          | YML071C                 | COG8          |
| YCR066W                                          | RAD18         | YPR032W                 | SRO7          |
| YMR216C                                          | SKY1          | YHR060W                 | VMA22         |
| YJR024C                                          | MDE1          | YPL178W                 | CBC2          |
| YPR120C                                          | CLB5          | YMR038C                 | CCS1          |
| YER144C                                          | UBP5          | YHR081W                 | LRP1          |
| YLR180W                                          | SAM1          | YOL081W                 | IRA2          |
| YHL002W                                          | HSE1          | YNL107W                 | YAF9          |
| YDR225W                                          | HTA1          | YDL056W                 | MBP1          |
| YKL110C                                          | KTI12         | YLR410W                 | VIP1          |
| YJL089W                                          | SIP4          | YDR477W                 | SNF1          |
| YBL008W                                          | HIR1          | YPL042C                 | SSN3          |
| YIL076W                                          | SEC28         | YBR108W                 | YBR108W       |
| YMR199W                                          | CLN1          | YBR171W                 | SEC66         |
| YDL184C                                          | RPL41A        | YGL003C                 | CDH1          |
| YLR386W                                          | VAC14         | YOR106W                 | VAM3          |
| YDR293C                                          | SSD1          | YDR320C                 | SWA2          |
| YHR012W                                          | VPS29         | YHL002W                 | HSE1          |
| YLR234W                                          | TOP3          | YDL185W                 | TFP1          |
| YBL021C                                          | HAP3          | YJR032W                 | CPR7          |
| YLR090W                                          | XDJ1          | YKL116C                 | PRR1          |
| YGL115W                                          | SNF4          | YJL183W                 | MNN11         |

| Predictions at threshold level 0.80 continued... |               |                         |               |
|--------------------------------------------------|---------------|-------------------------|---------------|
| Gene1 of predicted pair                          |               | Gene2 of predicted pair |               |
| Systematic Name                                  | Standard Name | Systematic Name         | Standard Name |
| YGR072W                                          | UPF3          | YER120W                 | SCS2          |
| YDL083C                                          | RPS16B        | YJL095W                 | BCK1          |
| YGL115W                                          | SNF4          | YDR310C                 | SUM1          |
| YLR410W                                          | VIP1          | YML112W                 | CTK3          |
| YDR092W                                          | UBC13         | YCR066W                 | RAD18         |
| YOR033C                                          | EXO1          | YKR072C                 | SIS2          |
| YJL036W                                          | SNX4          | YOR069W                 | VPS5          |
| YPR120C                                          | CLB5          | YML112W                 | CTK3          |
| YLR452C                                          | SST2          | YGL003C                 | CDH1          |
| YHR013C                                          | ARD1          | YHR200W                 | RPN10         |
| YOR001W                                          | RRP6          | YER161C                 | SPT2          |
| YBR041W                                          | FAT1          | YOR059C                 | YOR059C       |
| YGL147C                                          | RPL9A         | YNL076W                 | MKS1          |
| YMR199W                                          | CLN1          | YPL246C                 | RBD2          |
| YOL082W                                          | ATG19         | YGL156W                 | AMS1          |
| YOR127W                                          | RGA1          | YJL004C                 | SYS1          |
| YDR080W                                          | VPS41         | YEL051W                 | VMA8          |
| YMR153W                                          | NUP53         | YPL178W                 | CBC2          |
| YDR004W                                          | RAD57         | YBR107C                 | IML3          |
| YBR280C                                          | SAF1          | YDR207C                 | UME6          |
| YLL007C                                          | YLL007C       | YDR183W                 | PLP1          |
| YPL024W                                          | RMI1          | YGL175C                 | SAE2          |
| YLR079W                                          | SIC1          | YER115C                 | SPR6          |
| YNL238W                                          | KEX2          | YGR105W                 | VMA21         |
| YHR152W                                          | SPO12         | YPL256C                 | CLN2          |
| YNL093W                                          | YPT53         | YPR119W                 | CLB2          |
| YPR051W                                          | MAK3          | YDL077C                 | VAM6          |
| YAL024C                                          | LTE1          | YDR379W                 | RGA2          |
| YNL106C                                          | INP52         | YGL252C                 | RTG2          |

| Predictions at threshold level 0.80 continued... |               |                         |               |
|--------------------------------------------------|---------------|-------------------------|---------------|
| Gene1 of predicted pair                          |               | Gene2 of predicted pair |               |
| Systematic Name                                  | Standard Name | Systematic Name         | Standard Name |
| YNR072W                                          | HXT17         | YGL115W                 | SNF4          |
| YPR018W                                          | RLF2          | YML115C                 | VAN1          |
| YLR288C                                          | MEC3          | YHR152W                 | SPO12         |
| YPL137C                                          | GIP3          | YPR046W                 | MCM16         |
| YIL076W                                          | SEC28         | YLR386W                 | VAC14         |
| YMR202W                                          | ERG2          | YNL289W                 | PCL1          |
| YOR033C                                          | EXO1          | YPL022W                 | RAD1          |
| YLR079W                                          | SIC1          | YNL307C                 | MCK1          |
| YOR144C                                          | ELG1          | YHR098C                 | SFB3          |
| YMR273C                                          | ZDS1          | YCR086W                 | CSM1          |
| YNR052C                                          | POP2          | YNL116W                 | DMA2          |
| YPL024W                                          | RMI1          | YNL325C                 | FIG4          |
| YLR360W                                          | VPS38         | YJR040W                 | GEF1          |
| YOR127W                                          | RGA1          | YML038C                 | YMD8          |
| YMR199W                                          | CLN1          | YOR043W                 | WHI2          |
| YAL024C                                          | LTE1          | YKL110C                 | KTI12         |
| YAL024C                                          | LTE1          | YDR477W                 | SNF1          |
| YDR378C                                          | LSM6          | YKL160W                 | ELF1          |
| YLR006C                                          | SSK1          | YPL256C                 | CLN2          |
| YJR032W                                          | CPR7          | YMR214W                 | SCJ1          |
| YLR018C                                          | POM34         | YMR199W                 | CLN1          |
| YPR018W                                          | RLF2          | YNL264C                 | PDR17         |
| YIL053W                                          | RHR2          | YBR217W                 | ATG12         |
| YKL139W                                          | CTK1          | YMR311C                 | GLC8          |
| YDL083C                                          | RPS16B        | YNL238W                 | KEX2          |
| YBL101C                                          | ECM21         | YLR425W                 | TUS1          |
| YDR176W                                          | NGG1          | YLR399C                 | BDF1          |
| YFR030W                                          | MET10         | YPR046W                 | MCM16         |
| YJR084W                                          | CSN12         | YLR370C                 | ARC18         |



| Predictions at threshold level 0.80 continued... |               |                         |               |
|--------------------------------------------------|---------------|-------------------------|---------------|
| Gene1 of predicted pair                          |               | Gene2 of predicted pair |               |
| Systematic Name                                  | Standard Name | Systematic Name         | Standard Name |
| YFR021W                                          | ATG18         | YDL149W                 | ATG9          |
| YMR026C                                          | PEX12         | YNL058C                 | YNL058C       |
| YBR200W                                          | BEM1          | YOR358W                 | HAP5          |
| YDL020C                                          | RPN4          | YMR179W                 | SPT21         |
| YDR358W                                          | GGA1          | YMR230W                 | RPS10B        |
| YGL115W                                          | SNF4          | YDL077C                 | VAM6          |
| YLR182W                                          | SWI6          | YAL002W                 | VPS8          |
| YLR093C                                          | NYV1          | YDR310C                 | SUM1          |
| YIL034C                                          | CAP2          | YJL190C                 | RPS22A        |
| YGR081C                                          | SLX9          | YMR199W                 | CLN1          |
| YCR088W                                          | ABP1          | YDL226C                 | GCS1          |
| YDR363W-A                                        | SEM1          | YOL054W                 | PSH1          |
| YNL218W                                          | MGS1          | YHR077C                 | NMD2          |
| YGL178W                                          | MPT5          | YER167W                 | BCK2          |
| YMR284W                                          | YKU70         | YKL114C                 | APN1          |
| YKR014C                                          | YPT52         | YJL095W                 | BCK1          |
| YDL113C                                          | ATG20         | YPR049C                 | ATG11         |
| YGL161C                                          | YIP5          | YOR308C                 | SNU66         |
| YPL042C                                          | SSN3          | YDR254W                 | CHL4          |
| YLR061W                                          | RPL22A        | YKR020W                 | VPS51         |
| YDR484W                                          | VPS52         | YER044C                 | ERG28         |
| YER144C                                          | UBP5          | YMR311C                 | GLC8          |
| YBL025W                                          | RRN10         | YLR180W                 | SAM1          |
| YGL174W                                          | BUD13         | YHR167W                 | THP2          |
| YNL297C                                          | MON2          | YNL107W                 | YAF9          |
| YJL110C                                          | GZF3          | YKR034W                 | DAL80         |
| YIL156W                                          | UBP7          | YHL002W                 | HSE1          |
| YPL105C                                          | YPL105C       | YPL161C                 | BEM4          |
| YLR386W                                          | VAC14         | YDL155W                 | CLB3          |

| Predictions at threshold level 0.80 continued... |               |                         |               |
|--------------------------------------------------|---------------|-------------------------|---------------|
| Gene1 of predicted pair                          |               | Gene2 of predicted pair |               |
| Systematic Name                                  | Standard Name | Systematic Name         | Standard Name |
| YLR288C                                          | MEC3          | YGL175C                 | SAE2          |
| YFR031C-A                                        | RPL2A         | YMR224C                 | MRE11         |
| YEL065W                                          | SIT1          | YDR261C                 | EXG2          |
| YLR360W                                          | VPS38         | YGL124C                 | MON1          |
| YER116C                                          | SLX8          | YNL016W                 | PUB1          |
| YDR443C                                          | SSN2          | YNL041C                 | COG6          |
| YKR001C                                          | VPS1          | YDL077C                 | VAM6          |
| YDR004W                                          | RAD57         | YDL059C                 | RAD59         |
| YDR293C                                          | SSD1          | YHR039C-A               | VMA10         |
| YFR036W                                          | CDC26         | YBL072C                 | RPS8A         |
| YDL056W                                          | MBP1          | YPR120C                 | CLB5          |
| YGR241C                                          | YAP1802       | YJR125C                 | ENT3          |
| YOL121C                                          | RPS19A        | YLR180W                 | SAM1          |
| YDL184C                                          | RPL41A        | YOR043W                 | WHI2          |
| YBL079W                                          | NUP170        | YML028W                 | TSA1          |
| YDR484W                                          | VPS52         | YJL183W                 | MNN11         |
| YLR192C                                          | HCR1          | YBR181C                 | RPS6B         |
| YDR335W                                          | MSN5          | YJL006C                 | CTK2          |
| YMR202W                                          | ERG2          | YDR309C                 | GIC2          |
| YDR359C                                          | EAF1          | YGL190C                 | CDC55         |
| YNL238W                                          | KEX2          | YKR030W                 | GMH1          |
| YBL058W                                          | SHP1          | YOL111C                 | MDY2          |
| YMR116C                                          | ASC1          | YER116C                 | SLX8          |
| YDR320C                                          | SWA2          | YJR032W                 | CPR7          |
| YBL088C                                          | TEL1          | YJR021C                 | REC107        |
| YGL161C                                          | YIP5          | YHR200W                 | RPN10         |
| YMR095C                                          | SNO1          | YBR030W                 | YBR030W       |
| YIL076W                                          | SEC28         | YLR398C                 | SKI2          |
| YBR200W                                          | BEM1          | YBL101C                 | ECM21         |

| Predictions at threshold level 0.80 continued... |               |                         |               |
|--------------------------------------------------|---------------|-------------------------|---------------|
| Gene1 of predicted pair                          |               | Gene2 of predicted pair |               |
| Systematic Name                                  | Standard Name | Systematic Name         | Standard Name |
| YIL159W                                          | BNR1          | YNL289W                 | PCL1          |
| YDR484W                                          | VPS52         | YMR311C                 | GLC8          |
| YPL090C                                          | RPS6A         | YGL246C                 | RAI1          |
| YML102W                                          | CAC2          | YHR010W                 | RPL27A        |
| YKL025C                                          | PAN3          | YBR114W                 | RAD16         |
| YPR120C                                          | CLB5          | YLR032W                 | RAD5          |
| YPL022W                                          | RAD1          | YBR073W                 | RDH54         |
| YDR378C                                          | LSM6          | YIL103W                 | DPH1          |
| YJR032W                                          | CPR7          | YCR086W                 | CSM1          |
| YOR270C                                          | VPH1          | YBL103C                 | RTG3          |
| YNL032W                                          | SIW14         | YDR137W                 | RGP1          |
| YLR090W                                          | XDJ1          | YFL023W                 | BUD27         |
| YMR224C                                          | MRE11         | YDR318W                 | MCM21         |
| YNL243W                                          | SLA2          | YPL259C                 | APM1          |
| YPL057C                                          | SUR1          | YPR120C                 | CLB5          |
| YMR172W                                          | HOT1          | YDR254W                 | CHL4          |
| YCL037C                                          | SRO9          | YCL001W                 | RER1          |
| YOL148C                                          | SPT20         | YLR182W                 | SWI6          |
| YLR381W                                          | CTF3          | YGL253W                 | HXK2          |
| YOR213C                                          | SAS5          | YML097C                 | VPS9          |
| YLR234W                                          | TOP3          | YGL237C                 | HAP2          |
| YOR127W                                          | RGA1          | YDR183W                 | PLP1          |
| YDR440W                                          | DOT1          | YJL183W                 | MNN11         |
| YMR153W                                          | NUP53         | YPL161C                 | BEM4          |
| YLR381W                                          | CTF3          | YPR120C                 | CLB5          |
| YNL264C                                          | PDR17         | YDL006W                 | PTC1          |
| YGR019W                                          | UGA1          | YOR132W                 | VPS17         |
| YDL002C                                          | NHP10         | YCR077C                 | PAT1          |
| YDR108W                                          | GSG1          | YGL223C                 | COG1          |

| Predictions at threshold level 0.80 continued... |               |                         |               |
|--------------------------------------------------|---------------|-------------------------|---------------|
| Gene1 of predicted pair                          |               | Gene2 of predicted pair |               |
| Systematic Name                                  | Standard Name | Systematic Name         | Standard Name |
| YOR066W                                          | MSA1          | YMR152W                 | YIM1          |
| YLR447C                                          | VMA6          | YJL190C                 | RPS22A        |
| YHR156C                                          | LIN1          | YGL003C                 | CDH1          |
| YML016C                                          | PPZ1          | YCR086W                 | CSM1          |
| YBL051C                                          | PIN4          | YBR171W                 | SEC66         |
| YLR447C                                          | VMA6          | YGL151W                 | NUT1          |
| YKL048C                                          | ELM1          | YLR180W                 | SAM1          |
| YKL139W                                          | CTK1          | YIL076W                 | SEC28         |
| YHR134W                                          | WSS1          | YGL031C                 | RPL24A        |
| YDR383C                                          | NKP1          | YKL110C                 | KTI12         |
| YML001W                                          | YPT7          | YPR028W                 | YOP1          |
| YHR200W                                          | RPN10         | YGR188C                 | BUB1          |
| YGL078C                                          | DBP3          | YNR072W                 | HXT17         |
| YMR026C                                          | PEX12         | YLR192C                 | HCR1          |
| YDR293C                                          | SSD1          | YGR270W                 | YTA7          |
| YGL115W                                          | SNF4          | YMR152W                 | YIM1          |
| YOR358W                                          | HAP5          | YKL048C                 | ELM1          |
| YJR074W                                          | MOG1          | YPR119W                 | CLB2          |
| YDL116W                                          | NUP84         | YLR018C                 | POM34         |
| YJR060W                                          | CBF1          | YGL252C                 | RTG2          |
| YPR046W                                          | MCM16         | YJL190C                 | RPS22A        |
| YGR081C                                          | SLX9          | YHR010W                 | RPL27A        |
| YJR033C                                          | RAV1          | YOL108C                 | INO4          |
| YEL065W                                          | SIT1          | YGL212W                 | VAM7          |
| YGL115W                                          | SNF4          | YER120W                 | SCS2          |
| YLR292C                                          | SEC72         | YBL051C                 | PIN4          |
| YKL139W                                          | CTK1          | YNL032W                 | SIW14         |
| YDL155W                                          | CLB3          | YJL006C                 | CTK2          |
| YDR379W                                          | RGA2          | YDR363W-A               | SEM1          |

| Predictions at threshold level 0.80 continued... |               |                         |               |
|--------------------------------------------------|---------------|-------------------------|---------------|
| Gene1 of predicted pair                          |               | Gene2 of predicted pair |               |
| Systematic Name                                  | Standard Name | Systematic Name         | Standard Name |
| YNL058C                                          | YNL058C       | YLR094C                 | GIS3          |
| YLR371W                                          | ROM2          | YMR311C                 | GLC8          |
| YNL215W                                          | IES2          | YDR439W                 | LRS4          |
| YOR270C                                          | VPH1          | YDL077C                 | VAM6          |
| YMR127C                                          | SAS2          | YPR046W                 | MCM16         |
| YNL069C                                          | RPL16B        | YNL238W                 | KEX2          |
| YJR060W                                          | CBF1          | YNL225C                 | CNM67         |
| YMR224C                                          | MRE11         | YLR079W                 | SIC1          |
| YIL076W                                          | SEC28         | YAR014C                 | BUD14         |
| YOL051W                                          | GAL11         | YJL140W                 | RPB4          |
| YLR371W                                          | ROM2          | YPR030W                 | CSR2          |
| YLR095C                                          | IOC2          | YFL023W                 | BUD27         |
| YGL212W                                          | VAM7          | YEL060C                 | PRB1          |
| YDR080W                                          | VPS41         | YEL043W                 | YEL043W       |
| YCR034W                                          | FEN1          | YBR274W                 | CHK1          |
| YGL003C                                          | CDH1          | YER040W                 | GLN3          |
| YBR200W                                          | BEM1          | YHL027W                 | RIM101        |
| YNL238W                                          | KEX2          | YLR370C                 | ARC18         |
| YGL115W                                          | SNF4          | YGL124C                 | MON1          |
| YNL087W                                          | TCB2          | YMR311C                 | GLC8          |
| YNL032W                                          | SIW14         | YOL111C                 | MDY2          |
| YLL039C                                          | UBI4          | YCR077C                 | PAT1          |
| YGL212W                                          | VAM7          | YER044C                 | ERG28         |
| YIL159W                                          | BNR1          | YLR320W                 | MMS22         |
| YGL212W                                          | VAM7          | YKL048C                 | ELM1          |
| YDR378C                                          | LSM6          | YOL054W                 | PSH1          |
| YLR288C                                          | MEC3          | YLR350W                 | ORM2          |
| YHR200W                                          | RPN10         | YKL160W                 | ELF1          |
| YNL325C                                          | FIG4          | YPR046W                 | MCM16         |

| Predictions at threshold level 0.80 continued... |               |                         |               |
|--------------------------------------------------|---------------|-------------------------|---------------|
| Gene1 of predicted pair                          |               | Gene2 of predicted pair |               |
| Systematic Name                                  | Standard Name | Systematic Name         | Standard Name |
| YOL111C                                          | MDY2          | YGL003C                 | CDH1          |
| YGR261C                                          | APL6          | YML038C                 | YMD8          |
| YNR052C                                          | POP2          | YOL054W                 | PSH1          |
| YOR127W                                          | RGA1          | YIL008W                 | URM1          |
| YBR215W                                          | HPC2          | YOR308C                 | SNU66         |
| YDR225W                                          | HTA1          | YDR076W                 | RAD55         |
| YBL102W                                          | SFT2          | YMR054W                 | STV1          |
| YKL116C                                          | PRR1          | YLR093C                 | NYV1          |
| YFR031C-A                                        | RPL2A         | YBR280C                 | SAF1          |
| YPR131C                                          | NAT3          | YPL022W                 | RAD1          |
| YMR116C                                          | ASC1          | YHR013C                 | ARD1          |
| YGR241C                                          | YAP1802       | YHR161C                 | YAP1801       |
| YCR066W                                          | RAD18         | YGR105W                 | VMA21         |
| YNL206C                                          | RTT106        | YGR184C                 | UBR1          |
| YML016C                                          | PPZ1          | YJL190C                 | RPS22A        |
| YDR108W                                          | GSG1          | YOL018C                 | TLG2          |
| YKR035W-A                                        | DID2          | YDR310C                 | SUM1          |
| YGL223C                                          | COG1          | YCL001W                 | RER1          |
| YDR254W                                          | CHL4          | YNL225C                 | CNM67         |
| YGL190C                                          | CDC55         | YDL194W                 | SNF3          |
| YDR174W                                          | HMO1          | YPL018W                 | CTF19         |
| YPL024W                                          | RMI1          | YCR077C                 | PAT1          |
| YHR134W                                          | WSS1          | YMR116C                 | ASC1          |
| YIL076W                                          | SEC28         | YLR315W                 | NKP2          |
| YLR079W                                          | SIC1          | YCR024C-A               | PMP1          |
| YPL161C                                          | BEM4          | YNL041C                 | COG6          |
| YPR084W                                          | YPR084W       | YCL001W                 | RER1          |
| YOR069W                                          | VPS5          | YNL238W                 | KEX2          |
| YER044C-A                                        | MEI4          | YJR021C                 | REC107        |

| Predictions at threshold level 0.80 continued... |               |                         |               |
|--------------------------------------------------|---------------|-------------------------|---------------|
| Gene1 of predicted pair                          |               | Gene2 of predicted pair |               |
| Systematic Name                                  | Standard Name | Systematic Name         | Standard Name |
| YML095C                                          | RAD10         | YJL183W                 | MNN11         |
| YHR134W                                          | WSS1          | YPL253C                 | VIK1          |
| YGL087C                                          | MMS2          | YBR057C                 | MUM2          |
| YAL024C                                          | LTE1          | YCR077C                 | PAT1          |
| YOR071C                                          | THI71         | YKR093W                 | PTR2          |
| YLR386W                                          | VAC14         | YJL187C                 | SWE1          |
| YOR243C                                          | PUS7          | YHR077C                 | NMD2          |
| YGL212W                                          | VAM7          | YDL006W                 | PTC1          |
| YBL058W                                          | SHP1          | YBL025W                 | RRN10         |
| YNL215W                                          | IES2          | YBR107C                 | IML3          |
| YMR026C                                          | PEX12         | YMR311C                 | GLC8          |
| YKR001C                                          | VPS1          | YOR275C                 | RIM20         |
| YML016C                                          | PPZ1          | YDL006W                 | PTC1          |
| YKL048C                                          | ELM1          | YDL155W                 | CLB3          |
| YKL110C                                          | KTI12         | YIL103W                 | DPH1          |
| YDL184C                                          | RPL41A        | YPL057C                 | SUR1          |
| YDR309C                                          | GIC2          | YCR077C                 | PAT1          |
| YGL153W                                          | PEX14         | YJL183W                 | MNN11         |
| YGR239C                                          | PEX21         | YDR244W                 | PEX5          |
| YLR090W                                          | XDJ1          | YOR327C                 | SNC2          |
| YNL094W                                          | APP1          | YPL246C                 | RBD2          |
| YPR018W                                          | RLF2          | YMR224C                 | MRE11         |
| YLR320W                                          | MMS22         | YLR398C                 | SKI2          |
| YGL078C                                          | DBP3          | YMR152W                 | YIM1          |
| YBR065C                                          | ECM2          | YJR050W                 | ISY1          |
| YLR192C                                          | HCR1          | YHR156C                 | LIN1          |
| YER110C                                          | KAP123        | YMR055C                 | BUB2          |
| YJL172W                                          | CPS1          | YML071C                 | COG8          |
| YML115C                                          | VAN1          | YDL223C                 | HBT1          |

| Predictions at threshold level 0.80 continued... |               |                         |               |
|--------------------------------------------------|---------------|-------------------------|---------------|
| Gene1 of predicted pair                          |               | Gene2 of predicted pair |               |
| Systematic Name                                  | Standard Name | Systematic Name         | Standard Name |
| YBR200W                                          | BEM1          | YDR318W                 | MCM21         |
| YLR386W                                          | VAC14         | YLR093C                 | NYV1          |
| YLR095C                                          | IOC2          | YMR153W                 | NUP53         |
| YJR135C                                          | MCM22         | YGL124C                 | MON1          |
| YMR198W                                          | CIK1          | YGL163C                 | RAD54         |
| YNL215W                                          | IES2          | YBR194W                 | SOY1          |
| YNL325C                                          | FIG4          | YHR200W                 | RPN10         |
| YDR146C                                          | SWI5          | YJL124C                 | LSM1          |
| YPR120C                                          | CLB5          | YHR039C-A               | VMA10         |
| YJL060W                                          | BNA3          | YPL106C                 | SSE1          |
| YLR192C                                          | HCR1          | YBR108W                 | YBR108W       |
| YGR249W                                          | MGA1          | YDL077C                 | VAM6          |
| YER162C                                          | RAD4          | YPR046W                 | MCM16         |
| YFL023W                                          | BUD27         | YBR019C                 | GAL10         |
| YOR069W                                          | VPS5          | YOR036W                 | PEP12         |
| YER120W                                          | SCS2          | YJR033C                 | RAV1          |
| YBR171W                                          | SEC66         | YER040W                 | GLN3          |
| YOR106W                                          | VAM3          | YER162C                 | RAD4          |
| YKL048C                                          | ELM1          | YPR119W                 | CLB2          |
| YML109W                                          | ZDS2          | YBR010W                 | HHT1          |
| YNL041C                                          | COG6          | YDR318W                 | MCM21         |
| YDR318W                                          | MCM21         | YKL114C                 | APN1          |
| YBL058W                                          | SHP1          | YJR084W                 | CSN12         |
| YJR032W                                          | CPR7          | YCR031C                 | RPS14A        |
| YMR055C                                          | BUB2          | YPL018W                 | CTF19         |
| YLR360W                                          | VPS38         | YOR327C                 | SNC2          |
| YKL032C                                          | IXR1          | YOR275C                 | RIM20         |
| YBR290W                                          | BSD2          | YML057W                 | CMP2          |
| YNR072W                                          | HXT17         | YHR039C-A               | VMA10         |



| Predictions at threshold level 0.80 continued... |               |                         |               |
|--------------------------------------------------|---------------|-------------------------|---------------|
| Gene1 of predicted pair                          |               | Gene2 of predicted pair |               |
| Systematic Name                                  | Standard Name | Systematic Name         | Standard Name |
| YDL223C                                          | HBT1          | YGL124C                 | MON1          |
| YDR254W                                          | CHL4          | YGL253W                 | HXK2          |
| YMR284W                                          | YKU70         | YEL056W                 | HAT2          |
| YBR041W                                          | FAT1          | YPR119W                 | CLB2          |
| YPL001W                                          | HAT1          | YOR038C                 | HIR2          |
| YOR191W                                          | RIS1          | YFR010W                 | UBP6          |
| YMR095C                                          | SNO1          | YBR108W                 | YBR108W       |
| YFL013C                                          | IES1          | YNL199C                 | GCR2          |
| YPL018W                                          | CTF19         | YGR188C                 | BUB1          |
| YER001W                                          | MNN1          | YBL047C                 | EDE1          |
| YER139C                                          | YER139C       | YDL077C                 | VAM6          |
| YLR447C                                          | VMA6          | YEL053C                 | MAK10         |
| YNL106C                                          | INP52         | YDR289C                 | RTT103        |
| YLR090W                                          | XDJ1          | YML001W                 | YPT7          |
| YNL079C                                          | TPM1          | YBL101C                 | ECM21         |
| YDR146C                                          | SWI5          | YJL095W                 | BCK1          |
| YOR023C                                          | AHC1          | YHR114W                 | BZZ1          |
| YNL236W                                          | SIN4          | YDL047W                 | SIT4          |
| YNL032W                                          | SIW14         | YDR484W                 | VPS52         |
| YNL054W                                          | VAC7          | YFR030W                 | MET10         |
| YDR174W                                          | HMO1          | YNL107W                 | YAF9          |
| YER162C                                          | RAD4          | YNL107W                 | YAF9          |
| YLL007C                                          | YLL007C       | YOR358W                 | HAP5          |
| YGL078C                                          | DBP3          | YER162C                 | RAD4          |
| YOR290C                                          | SNF2          | YOR035C                 | SHE4          |
| YLR370C                                          | ARC18         | YBR280C                 | SAF1          |
| YGL060W                                          | YBP2          | YDR200C                 | VPS64         |
| YBR173C                                          | UMP1          | YOR195W                 | SLK19         |
| YLR192C                                          | HCR1          | YML097C                 | VPS9          |

| Predictions at threshold level 0.80 continued... |               |                         |               |
|--------------------------------------------------|---------------|-------------------------|---------------|
| Gene1 of predicted pair                          |               | Gene2 of predicted pair |               |
| Systematic Name                                  | Standard Name | Systematic Name         | Standard Name |
| YJL154C                                          | VPS35         | YHR111W                 | UBA4          |
| YJR140C                                          | HIR3          | YIR005W                 | IST3          |
| YGR104C                                          | SRB5          | YGR089W                 | NNF2          |
| YEL065W                                          | SIT1          | YGL115W                 | SNF4          |
| YHL031C                                          | GOS1          | YML012W                 | ERV25         |
| YGL135W                                          | RPL1B         | YGL200C                 | EMP24         |
| YOR127W                                          | RGA1          | YOR023C                 | AHC1          |
| YGR108W                                          | CLB1          | YDR183W                 | PLP1          |
| YEL065W                                          | SIT1          | YLR371W                 | ROM2          |
| YBR019C                                          | GAL10         | YDL077C                 | VAM6          |
| YNL032W                                          | SIW14         | YJL172W                 | CPS1          |
| YMR016C                                          | SOK2          | YCR053W                 | THR4          |
| YOR312C                                          | RPL20B        | YGR135W                 | PRE9          |
| YFR010W                                          | UBP6          | YOR001W                 | RRP6          |
| YBR173C                                          | UMP1          | YOR066W                 | MSA1          |
| YDR484W                                          | VPS52         | YKR001C                 | VPS1          |
| YBR171W                                          | SEC66         | YEL060C                 | PRB1          |
| YGR072W                                          | UPF3          | YML001W                 | YPT7          |
| YDR363W-A                                        | SEM1          | YBL047C                 | EDE1          |
| YFR010W                                          | UBP6          | YJR035W                 | RAD26         |
| YJR024C                                          | MDE1          | YML057W                 | CMP2          |
| YGR261C                                          | APL6          | YNL041C                 | COG6          |
| YDR080W                                          | VPS41         | YNL238W                 | KEX2          |
| YKL041W                                          | VPS24         | YOL081W                 | IRA2          |
| YDR507C                                          | GIN4          | YJR090C                 | GRR1          |
| YIL156W                                          | UBP7          | YMR273C                 | ZDS1          |
| YPL024W                                          | RMI1          | YER161C                 | SPT2          |
| YLR090W                                          | XDJ1          | YLR441C                 | RPS1A         |
| YBR108W                                          | YBR108W       | YDR137W                 | RGP1          |

| Predictions at threshold level 0.80 continued... |               |                         |               |
|--------------------------------------------------|---------------|-------------------------|---------------|
| Gene1 of predicted pair                          |               | Gene2 of predicted pair |               |
| Systematic Name                                  | Standard Name | Systematic Name         | Standard Name |
| YPR046W                                          | MCM16         | YNL107W                 | YAF9          |
| YNL087W                                          | TCB2          | YDL083C                 | RPS16B        |
| YIL036W                                          | CST6          | YDR439W                 | LRS4          |
| YGL153W                                          | PEX14         | YHL002W                 | HSE1          |
| YGL078C                                          | DBP3          | YOR327C                 | SNC2          |
| YLR292C                                          | SEC72         | YHR178W                 | STB5          |
| YBR108W                                          | YBR108W       | YBR114W                 | RAD16         |
| YML062C                                          | MFT1          | YCR077C                 | PAT1          |
| YOR290C                                          | SNF2          | YDR310C                 | SUM1          |
| YOR127W                                          | RGA1          | YBL051C                 | PIN4          |
| YLR371W                                          | ROM2          | YDR310C                 | SUM1          |
| YJL176C                                          | SWI3          | YDR073W                 | SNF11         |
| YMR127C                                          | SAS2          | YMR109W                 | MYO5          |
| YBR030W                                          | YBR030W       | YDL223C                 | HBT1          |
| YJR056C                                          | YJR056C       | YLR094C                 | GIS3          |
| YBR200W                                          | BEM1          | YDR456W                 | NHX1          |
| YHR111W                                          | UBA4          | YCR077C                 | PAT1          |
| YNL058C                                          | YNL058C       | YDR310C                 | SUM1          |
| YPR051W                                          | MAK3          | YOR109W                 | INP53         |
| YPR017C                                          | DSS4          | YPL234C                 | TFP3          |
| YNR052C                                          | POP2          | YOL090W                 | MSH2          |
| YHL031C                                          | GOS1          | YER139C                 | YER139C       |
| YIR005W                                          | IST3          | YFR030W                 | MET10         |
| YMR224C                                          | MRE11         | YPL253C                 | VIK1          |
| YGL087C                                          | MMS2          | YJL154C                 | VPS35         |
| YNL069C                                          | RPL16B        | YGL212W                 | VAM7          |
| YDR293C                                          | SSD1          | YOR208W                 | PTP2          |
| YMR152W                                          | YIM1          | YEL060C                 | PRB1          |
| YBL102W                                          | SFT2          | YOR109W                 | INP53         |

| Predictions at threshold level 0.80 continued... |               |                         |               |
|--------------------------------------------------|---------------|-------------------------|---------------|
| Gene1 of predicted pair                          |               | Gene2 of predicted pair |               |
| Systematic Name                                  | Standard Name | Systematic Name         | Standard Name |
| YGR261C                                          | APL6          | YHL020C                 | OPI1          |
| YBL058W                                          | SHP1          | YNR072W                 | HXT17         |
| YBL047C                                          | EDE1          | YNL079C                 | TPM1          |
| YJL036W                                          | SNX4          | YHL020C                 | OPI1          |
| YOR358W                                          | HAP5          | YPL256C                 | CLN2          |
| YBR126C                                          | TPS1          | YDR477W                 | SNF1          |
| YKR048C                                          | NAP1          | YGR135W                 | PRE9          |
| YJR056C                                          | YJR056C       | YOL111C                 | MDY2          |
| YKL032C                                          | IXR1          | YEL056W                 | HAT2          |
| YNL297C                                          | MON2          | YDR310C                 | SUM1          |
| YMR224C                                          | MRE11         | YOR327C                 | SNC2          |
| YNL291C                                          | MID1          | YPL253C                 | VIK1          |
| YKL139W                                          | CTK1          | YKL213C                 | DOA1          |
| YCR034W                                          | FEN1          | YKL101W                 | HSL1          |
| YKL139W                                          | CTK1          | YNR072W                 | HXT17         |
| YBR274W                                          | CHK1          | YHR039C-A               | VMA10         |
| YDR028C                                          | REG1          | YDL229W                 | SSB1          |
| YDR479C                                          | PEX29         | YMR204C                 | INP1          |
| YMR055C                                          | BUB2          | YLR350W                 | ORM2          |
| YPR084W                                          | YPR084W       | YOR308C                 | SNU66         |
| YBR280C                                          | SAF1          | YMR230W                 | RPS10B        |
| YOR140W                                          | SFL1          | YPL256C                 | CLN2          |
| YGL185C                                          | YGL185C       | YPL240C                 | HSP82         |
| YLR192C                                          | HCR1          | YDL077C                 | VAM6          |
| YCR020C-A                                        | MAK31         | YHR060W                 | VMA22         |
| YFR010W                                          | UBP6          | YPL018W                 | CTF19         |
| YKL139W                                          | CTK1          | YBR030W                 | YBR030W       |
| YHR013C                                          | ARD1          | YJL095W                 | BCK1          |
| YBR131W                                          | CCZ1          | YHR200W                 | RPN10         |

| Predictions at threshold level 0.80 continued... |               |                         |               |
|--------------------------------------------------|---------------|-------------------------|---------------|
| Gene1 of predicted pair                          |               | Gene2 of predicted pair |               |
| Systematic Name                                  | Standard Name | Systematic Name         | Standard Name |
| YNL206C                                          | RTT106        | YGR135W                 | PRE9          |
| YER087C-B                                        | SBH1          | YBR175W                 | SWD3          |
| YDR146C                                          | SWI5          | YPL158C                 | YPL158C       |
| YGR020C                                          | VMA7          | YKL041W                 | VPS24         |
| YLR079W                                          | SIC1          | YOL054W                 | PSH1          |
| YGR241C                                          | YAP1802       | YBR127C                 | VMA2          |
| YNL069C                                          | RPL16B        | YMR054W                 | STV1          |
| YBR171W                                          | SEC66         | YDR289C                 | RTT103        |
| YHR156C                                          | LIN1          | YPR030W                 | CSR2          |
| YGL212W                                          | VAM7          | YPR032W                 | SRO7          |
| YOR290C                                          | SNF2          | YHR060W                 | VMA22         |
| YOR332W                                          | VMA4          | YPR036W                 | VMA13         |
| YNL166C                                          | BNI5          | YKL048C                 | ELM1          |
| YBR107C                                          | IML3          | YLR182W                 | SWI6          |
| YDR335W                                          | MSN5          | YEL013W                 | VAC8          |
| YNL307C                                          | MCK1          | YHR111W                 | UBA4          |
| YLR288C                                          | MEC3          | YKL101W                 | HSL1          |
| YDL184C                                          | RPL41A        | YLR093C                 | NYV1          |
| YPL161C                                          | BEM4          | YLR320W                 | MMS22         |
| YDR129C                                          | SAC6          | YPL045W                 | VPS16         |
| YNL025C                                          | SSN8          | YCR084C                 | TUP1          |
| YPR084W                                          | YPR084W       | YNL297C                 | MON2          |
| YBR057C                                          | MUM2          | YKL041W                 | VPS24         |
| YLR234W                                          | TOP3          | YDR318W                 | MCM21         |
| YLR386W                                          | VAC14         | YBR107C                 | IML3          |
| YLR441C                                          | RPS1A         | YHR081W                 | LRP1          |
| YCR020C-A                                        | MAK31         | YGL054C                 | ERV14         |
| YDR363W-A                                        | SEM1          | YIR005W                 | IST3          |
| YDL226C                                          | GCS1          | YPR119W                 | CLB2          |

| Predictions at threshold level 0.80 continued... |               |                         |               |
|--------------------------------------------------|---------------|-------------------------|---------------|
| Gene1 of predicted pair                          |               | Gene2 of predicted pair |               |
| Systematic Name                                  | Standard Name | Systematic Name         | Standard Name |
| YBR217W                                          | ATG12         | YBR019C                 | GAL10         |
| YCL001W                                          | RER1          | YPR032W                 | SRO7          |
| YEL053C                                          | MAK10         | YMR054W                 | STV1          |
| YBR030W                                          | YBR030W       | YEL060C                 | PRB1          |
| YDL042C                                          | SIR2          | YER110C                 | KAP123        |
| YGL054C                                          | ERV14         | YOL108C                 | INO4          |
| YKR048C                                          | NAP1          | YBL087C                 | RPL23A        |
| YKR035W-A                                        | DID2          | YDR486C                 | VPS60         |
| YER116C                                          | SLX8          | YGL175C                 | SAE2          |
| YBR260C                                          | RGD1          | YEL036C                 | ANP1          |
| YFR010W                                          | UBP6          | YBR036C                 | CSG2          |
| YLR234W                                          | TOP3          | YHR010W                 | RPL27A        |
| YLR216C                                          | CPR6          | YOL054W                 | PSH1          |
| YEL053C                                          | MAK10         | YJR084W                 | CSN12         |
| YEL065W                                          | SIT1          | YOL111C                 | MDY2          |
| YDR320C                                          | SWA2          | YPL161C                 | BEM4          |
| YIL036W                                          | CST6          | YMR055C                 | BUB2          |
| YOR043W                                          | WHI2          | YLR370C                 | ARC18         |
| YHR156C                                          | LIN1          | YMR016C                 | SOK2          |
| YGR184C                                          | UBR1          | YMR055C                 | BUB2          |
| YJR035W                                          | RAD26         | YKL114C                 | APN1          |
| YBR127C                                          | VMA2          | YJL095W                 | BCK1          |
| YGL223C                                          | COG1          | YNL051W                 | COG5          |
| YBL078C                                          | ATG8          | YKR001C                 | VPS1          |
| YGL115W                                          | SNF4          | YLR180W                 | SAM1          |
| YLR192C                                          | HCR1          | YPL057C                 | SUR1          |
| YKR057W                                          | RPS21A        | YPL256C                 | CLN2          |
| YMR026C                                          | PEX12         | YOR066W                 | MSA1          |
| YLR292C                                          | SEC72         | YBR108W                 | YBR108W       |

| Predictions at threshold level 0.80 continued... |               |                         |               |
|--------------------------------------------------|---------------|-------------------------|---------------|
| Gene1 of predicted pair                          |               | Gene2 of predicted pair |               |
| Systematic Name                                  | Standard Name | Systematic Name         | Standard Name |
| YDL005C                                          | MED2          | YNL107W                 | YAF9          |
| YMR080C                                          | NAM7          | YPL057C                 | SUR1          |
| YOR106W                                          | VAM3          | YEL042W                 | GDA1          |
| YCL037C                                          | SRO9          | YDR335W                 | MSN5          |
| YMR004W                                          | MVP1          | YML071C                 | COG8          |
| YER044C                                          | ERG28         | YDR261C                 | EXG2          |
| YNL291C                                          | MID1          | YNL297C                 | MON2          |
| YDR142C                                          | PEX7          | YIL160C                 | POT1          |
| YGR159C                                          | NSR1          | YFR036W                 | CDC26         |
| YLR433C                                          | CNA1          | YDR184C                 | ATC1          |
| YMR142C                                          | RPL13B        | YLR180W                 | SAM1          |
| YDR137W                                          | RGP1          | YOL121C                 | RPS19A        |
| YGR072W                                          | UPF3          | YJR140C                 | HIR3          |
| YGR020C                                          | VMA7          | YGR105W                 | VMA21         |
| YOR001W                                          | RRP6          | YPR046W                 | MCM16         |
| YHR079C                                          | IRE1          | YOL148C                 | SPT20         |
| YBR108W                                          | YBR108W       | YNL076W                 | MKS1          |
| YGR249W                                          | MGA1          | YJL095W                 | BCK1          |
| YOR127W                                          | RGA1          | YDR264C                 | AKR1          |
| YPR084W                                          | YPR084W       | YDR335W                 | MSN5          |
| YKR057W                                          | RPS21A        | YBL047C                 | EDE1          |
| YBL058W                                          | SHP1          | YHR156C                 | LIN1          |
| YDR293C                                          | SSD1          | YJL127C                 | SPT10         |
| YNL201C                                          | PSY2          | YIL036W                 | CST6          |
| YLR079W                                          | SIC1          | YIR005W                 | IST3          |
| YGR104C                                          | SRB5          | YLR410W                 | VIP1          |
| YLL039C                                          | UBI4          | YEL044W                 | IES6          |
| YOR076C                                          | SKI7          | YBR228W                 | SLX1          |
| YDR293C                                          | SSD1          | YHL020C                 | OPI1          |

| Predictions at threshold level 0.80 continued... |               |                         |               |
|--------------------------------------------------|---------------|-------------------------|---------------|
| Gene1 of predicted pair                          |               | Gene2 of predicted pair |               |
| Systematic Name                                  | Standard Name | Systematic Name         | Standard Name |
| YNL218W                                          | MGS1          | YGR072W                 | UPF3          |
| YKR099W                                          | BAS1          | YHR060W                 | VMA22         |
| YNL058C                                          | YNL058C       | YDR207C                 | UME6          |
| YLR441C                                          | RPS1A         | YLR093C                 | NYV1          |
| YBL102W                                          | SFT2          | YKR001C                 | VPS1          |
| YEL053C                                          | MAK10         | YJR033C                 | RAV1          |
| YGR249W                                          | MGA1          | YJL183W                 | MNN11         |
| YOR327C                                          | SNC2          | YNL107W                 | YAF9          |
| YGL174W                                          | BUD13         | YGR188C                 | BUB1          |
| YLR119W                                          | SRN2          | YLR180W                 | SAM1          |
| YDR507C                                          | GIN4          | YLL054C                 | YLL054C       |
| YIL159W                                          | BNR1          | YOL081W                 | IRA2          |
| YNL238W                                          | KEX2          | YDL077C                 | VAM6          |
| YJR056C                                          | YJR056C       | YER040W                 | GLN3          |
| YDL223C                                          | HBT1          | YER044C                 | ERG28         |
| YJR059W                                          | PTK2          | YPL256C                 | CLN2          |
| YDR484W                                          | VPS52         | YBL025W                 | RRN10         |
| YKL139W                                          | CTK1          | YGR135W                 | PRE9          |
| YMR153W                                          | NUP53         | YNL041C                 | COG6          |
| YPL106C                                          | SSE1          | YNL107W                 | YAF9          |
| YDR310C                                          | SUM1          | YOL108C                 | INO4          |
| YPR030W                                          | CSR2          | YDL077C                 | VAM6          |
| YCR034W                                          | FEN1          | YDR310C                 | SUM1          |
| YMR125W                                          | STO1          | YKR024C                 | DBP7          |
| YDL080C                                          | THI3          | YHR178W                 | STB5          |
| YEL065W                                          | SIT1          | YNL238W                 | KEX2          |
| YGL153W                                          | PEX14         | YOL081W                 | IRA2          |
| YMR224C                                          | MRE11         | YLR371W                 | ROM2          |
| YEL009C                                          | GCN4          | YDR073W                 | SNF11         |



| Predictions at threshold level 0.80 continued... |               |                         |               |
|--------------------------------------------------|---------------|-------------------------|---------------|
| Gene1 of predicted pair                          |               | Gene2 of predicted pair |               |
| Systematic Name                                  | Standard Name | Systematic Name         | Standard Name |
| YDL184C                                          | RPL41A        | YJR056C                 | YJR056C       |
| YJL154C                                          | VPS35         | YOR109W                 | INP53         |
| YGL178W                                          | MPT5          | YKL079W                 | SMY1          |
| YAL024C                                          | LTE1          | YBR280C                 | SAF1          |
| YLR079W                                          | SIC1          | YPL256C                 | CLN2          |
| YDL101C                                          | DUN1          | YJL187C                 | SWE1          |
| YPR135W                                          | CTF4          | YHR056C                 | RSC30         |
| YPL024W                                          | RMI1          | YDR484W                 | VPS52         |
| YEL009C                                          | GCN4          | YDR216W                 | ADR1          |
| YHR134W                                          | WSS1          | YNL166C                 | BNI5          |
| YBR111W-A                                        | SUS1          | YGL252C                 | RTG2          |
| YDR358W                                          | GGA1          | YBR019C                 | GAL10         |
| YML016C                                          | PPZ1          | YJR063W                 | RPA12         |
| YPL253C                                          | VIK1          | YOR008C                 | SLG1          |
| YDL020C                                          | RPN4          | YPR131C                 | NAT3          |
| YDL013W                                          | SLX5          | YLR032W                 | RAD5          |
| YDR004W                                          | RAD57         | YOR043W                 | WHI2          |
| YJL149W                                          | YJL149W       | YJL204C                 | RCY1          |
| YLR292C                                          | SEC72         | YGR270W                 | YTA7          |
| YDR144C                                          | MKC7          | YJL190C                 | RPS22A        |
| YCR065W                                          | HCM1          | YNL147W                 | LSM7          |
| YJR090C                                          | GRR1          | YAR014C                 | BUD14         |
| YEL022W                                          | GEA2          | YPL051W                 | ARL3          |
| YEL065W                                          | SIT1          | YBL025W                 | RRN10         |
| YER044C                                          | ERG28         | YHR081W                 | LRP1          |
| YDR477W                                          | SNF1          | YML001W                 | YPT7          |
| YGL094C                                          | PAN2          | YDR485C                 | VPS72         |
| YOL112W                                          | MSB4          | YOR327C                 | SNC2          |
| YDR440W                                          | DOT1          | YBL072C                 | RPS8A         |

| Predictions at threshold level 0.80 continued... |               |                         |               |
|--------------------------------------------------|---------------|-------------------------|---------------|
| Gene1 of predicted pair                          |               | Gene2 of predicted pair |               |
| Systematic Name                                  | Standard Name | Systematic Name         | Standard Name |
| YJR135C                                          | MCM22         | YDL047W                 | SIT4          |
| YCR086W                                          | CSM1          | YGL151W                 | NUT1          |
| YDR108W                                          | GSG1          | YCL037C                 | SRO9          |
| YHR081W                                          | LRP1          | YER139C                 | YER139C       |
| YLR441C                                          | RPS1A         | YLR094C                 | GIS3          |
| YLR447C                                          | VMA6          | YJR033C                 | RAV1          |
| YDR378C                                          | LSM6          | YNL147W                 | LSM7          |
| YLR095C                                          | IOC2          | YER040W                 | GLN3          |
| YDR477W                                          | SNF1          | YLR320W                 | MMS22         |
| YMR109W                                          | MYO5          | YEL056W                 | HAT2          |
| YML073C                                          | RPL6A         | YPR119W                 | CLB2          |
| YNL253W                                          | TEX1          | YML062C                 | MFT1          |
| YPR084W                                          | YPR084W       | YER162C                 | RAD4          |
| YCR020C-A                                        | MAK31         | YPL195W                 | APL5          |
| YOL018C                                          | TLG2          | YDR310C                 | SUM1          |
| YLR079W                                          | SIC1          | YKL114C                 | APN1          |
| YMR152W                                          | YIM1          | YCR053W                 | THR4          |
| YJL004C                                          | SYS1          | YML071C                 | COG8          |
| YML115C                                          | VAN1          | YGL153W                 | PEX14         |
| YLR192C                                          | HCR1          | YOR066W                 | MSA1          |
| YLR083C                                          | EMP70         | YPL120W                 | VPS30         |
| YNL025C                                          | SSN8          | YOR080W                 | DIA2          |
| YEL036C                                          | ANP1          | YKL041W                 | VPS24         |
| YKL139W                                          | CTK1          | YBR020W                 | GAL1          |
| YOR076C                                          | SKI7          | YHL002W                 | HSE1          |
| YDR076W                                          | RAD55         | YPL018W                 | CTF19         |
| YBR108W                                          | YBR108W       | YER110C                 | KAP123        |
| YDR174W                                          | HMO1          | YFR030W                 | MET10         |
| YPR052C                                          | NHP6A         | YOL051W                 | GAL11         |

| Predictions at threshold level 0.80 continued... |               |                         |               |
|--------------------------------------------------|---------------|-------------------------|---------------|
| Gene1 of predicted pair                          |               | Gene2 of predicted pair |               |
| Systematic Name                                  | Standard Name | Systematic Name         | Standard Name |
| YDR378C                                          | LSM6          | YMR055C                 | BUB2          |
| YOR112W                                          | CEX1          | YER120W                 | SCS2          |
| YPL195W                                          | APL5          | YER040W                 | GLN3          |
| YNL166C                                          | BNI5          | YGR270W                 | YTA7          |
| YJL053W                                          | PEP8          | YJL036W                 | SNX4          |
| YJL154C                                          | VPS35         | YOR112W                 | CEX1          |
| YNL325C                                          | FIG4          | YBR200W                 | BEM1          |
| YPL105C                                          | YPL105C       | YNL238W                 | KEX2          |
| YJR040W                                          | GEF1          | YEL043W                 | YEL043W       |
| YNR052C                                          | POP2          | YBR082C                 | UBC4          |
| YDL101C                                          | DUN1          | YJL124C                 | LSM1          |
| YDR440W                                          | DOT1          | YOR308C                 | SNU66         |
| YEL053C                                          | MAK10         | YHR114W                 | BZZ1          |
| YKL094W                                          | YJU3          | YMR152W                 | YIM1          |
| YJL124C                                          | LSM1          | YDL013W                 | SLX5          |
| YJL124C                                          | LSM1          | YAL002W                 | VPS8          |
| YOR290C                                          | SNF2          | YOR043W                 | WHI2          |
| YLR399C                                          | BDF1          | YDR378C                 | LSM6          |
| YNL307C                                          | MCK1          | YNL107W                 | YAF9          |
| YGL253W                                          | HXK2          | YHR114W                 | BZZ1          |
| YHR200W                                          | RPN10         | YLR180W                 | SAM1          |
| YNR032C-A                                        | HUB1          | YDL223C                 | HBT1          |
| YHR200W                                          | RPN10         | YDL155W                 | CLB3          |
| YOR195W                                          | SLK19         | YOR014W                 | RTS1          |
| YDR146C                                          | SWI5          | YHR158C                 | KEL1          |
| YML103C                                          | NUP188        | YOL054W                 | PSH1          |
| YJL127C                                          | SPT10         | YDR363W-A               | SEM1          |
| YOR337W                                          | TEA1          | YCR053W                 | THR4          |
| YGL200C                                          | EMP24         | YLR093C                 | NYV1          |

| Predictions at threshold level 0.80 continued... |               |                         |               |
|--------------------------------------------------|---------------|-------------------------|---------------|
| Gene1 of predicted pair                          |               | Gene2 of predicted pair |               |
| Systematic Name                                  | Standard Name | Systematic Name         | Standard Name |
| YBR107C                                          | IML3          | YJL006C                 | CTK2          |
| YGL223C                                          | COG1          | YNL293W                 | MSB3          |
| YNR052C                                          | POP2          | YPL018W                 | CTF19         |
| YGL025C                                          | PGD1          | YCR084C                 | TUP1          |
| YIL159W                                          | BNR1          | YLR119W                 | SRN2          |
| YCR038C                                          | BUD5          | YPL240C                 | HSP82         |
| YCR065W                                          | HCM1          | YJL058C                 | BIT61         |
| YNL201C                                          | PSY2          | YKL048C                 | ELM1          |
| YOR327C                                          | SNC2          | YDL077C                 | VAM6          |
| YLR337C                                          | VRP1          | YER110C                 | KAP123        |
| YKL007W                                          | CAP1          | YIL133C                 | RPL16A        |
| YMR142C                                          | RPL13B        | YBR036C                 | CSG2          |
| YGL178W                                          | MPT5          | YDR335W                 | MSN5          |
| YLR079W                                          | SIC1          | YOR014W                 | RTS1          |
| YNL291C                                          | MID1          | YMR054W                 | STV1          |
| YJR031C                                          | GEA1          | YKR030W                 | GMH1          |
| YML038C                                          | YMD8          | YNL041C                 | COG6          |
| YOR106W                                          | VAM3          | YEL013W                 | VAC8          |
| YHR156C                                          | LIN1          | YKL126W                 | YPK1          |
| YLR371W                                          | ROM2          | YNL076W                 | MKS1          |
| YPL045W                                          | VPS16         | YOR036W                 | PEP12         |
| YGL223C                                          | COG1          | YHL020C                 | OPI1          |
| YNL139C                                          | RLR1          | YNL253W                 | TEX1          |
| YDR477W                                          | SNF1          | YDL192W                 | ARF1          |
| YJR043C                                          | POL32         | YHR056C                 | RSC30         |
| YHR111W                                          | UBA4          | YHR013C                 | ARD1          |
| YGR020C                                          | VMA7          | YOL108C                 | INO4          |
| YCL067C                                          | HMLALPHA2     | YCL066W                 | HMLALPHA1     |
| YLR079W                                          | SIC1          | YLR058C                 | SHM2          |

| Predictions at threshold level 0.80 continued... |               |                         |               |
|--------------------------------------------------|---------------|-------------------------|---------------|
| Gene1 of predicted pair                          |               | Gene2 of predicted pair |               |
| Systematic Name                                  | Standard Name | Systematic Name         | Standard Name |
| YMR198W                                          | CIK1          | YBR181C                 | RPS6B         |
| YLR386W                                          | VAC14         | YNL032W                 | SIW14         |
| YNL248C                                          | RPA49         | YMR055C                 | BUB2          |
| YDR363W-A                                        | SEM1          | YOR014W                 | RTS1          |
| YHR200W                                          | RPN10         | YGL031C                 | RPL24A        |
| YLR315W                                          | NKP2          | YOR014W                 | RTS1          |
| YOL111C                                          | MDY2          | YLR094C                 | GIS3          |
| YMR080C                                          | NAM7          | YFR010W                 | UBP6          |
| YKL025C                                          | PAN3          | YDL155W                 | CLB3          |
| YOR231W                                          | MKK1          | YER089C                 | PTC2          |
| YOR076C                                          | SKI7          | YGL213C                 | SKI8          |
| YDL077C                                          | VAM6          | YDR207C                 | UME6          |
| YDR363W-A                                        | SEM1          | YDR254W                 | CHL4          |
| YDR261C                                          | EXG2          | YHR081W                 | LRP1          |
| YLR386W                                          | VAC14         | YBR108W                 | YBR108W       |
| YLR216C                                          | CPR6          | YGR135W                 | PRE9          |
| YGL237C                                          | HAP2          | YOR358W                 | HAP5          |
| YGR249W                                          | MGA1          | YNL058C                 | YNL058C       |
| YGR249W                                          | MGA1          | YGL124C                 | MON1          |
| YBR200W                                          | BEM1          | YER049W                 | TPA1          |
| YOR033C                                          | EXO1          | YMR284W                 | YKU70         |
| YJL029C                                          | VPS53         | YKR001C                 | VPS1          |
| YJL154C                                          | VPS35         | YGR019W                 | UGA1          |
| YMR199W                                          | CLN1          | YHR108W                 | GGA2          |
| YCR024C-A                                        | PMP1          | YOR358W                 | HAP5          |
| YDL020C                                          | RPN4          | YGR184C                 | UBR1          |
| YPR131C                                          | NAT3          | YER116C                 | SLX8          |
| YER144C                                          | UBP5          | YJR032W                 | CPR7          |
| YLR083C                                          | EMP70         | YMR054W                 | STV1          |

| Predictions at threshold level 0.80 continued... |               |                         |               |
|--------------------------------------------------|---------------|-------------------------|---------------|
| Gene1 of predicted pair                          |               | Gene2 of predicted pair |               |
| Systematic Name                                  | Standard Name | Systematic Name         | Standard Name |
| YFL023W                                          | BUD27         | YGL212W                 | VAM7          |
| YIL034C                                          | CAP2          | YML016C                 | PPZ1          |
| YLR429W                                          | CRN1          | YGL003C                 | CDH1          |
| YDR080W                                          | VPS41         | YPL045W                 | VPS16         |
| YMR127C                                          | SAS2          | YIL008W                 | URM1          |
| YNL288W                                          | CAF40         | YGR054W                 | YGR054W       |
| YPL152W                                          | RRD2          | YLR254C                 | NDL1          |
| YJR140C                                          | HIR3          | YKL213C                 | DOA1          |
| YEL053C                                          | MAK10         | YJR090C                 | GRR1          |
| YPR120C                                          | CLB5          | YHR108W                 | GGA2          |
| YNL076W                                          | MKS1          | YER040W                 | GLN3          |
| YDR318W                                          | MCM21         | YAR014C                 | BUD14         |
| YGL003C                                          | CDH1          | YOR141C                 | ARP8          |
| YOR043W                                          | WHI2          | YDR289C                 | RTT103        |
| YMR224C                                          | MRE11         | YER144C                 | UBP5          |
| YBL058W                                          | SHP1          | YGL033W                 | HOP2          |
| YNL215W                                          | IES2          | YOL081W                 | IRA2          |
| YKL101W                                          | HSL1          | YGL019W                 | CKB1          |
| YLR441C                                          | RPS1A         | YBR280C                 | SAF1          |
| YLR090W                                          | XDJ1          | YNL087W                 | TCB2          |
| YBR030W                                          | YBR030W       | YJR056C                 | YJR056C       |
| YBR108W                                          | YBR108W       | YER144C                 | UBP5          |
| YMR246W                                          | FAA4          | YKL140W                 | TGL1          |
| YHR060W                                          | VMA22         | YML071C                 | COG8          |
| YOR069W                                          | VPS5          | YMR004W                 | MVP1          |
| YBL025W                                          | RRN10         | YGL124C                 | MON1          |
| YPR051W                                          | MAK3          | YLR309C                 | IMH1          |
| YER143W                                          | DDI1          | YJL164C                 | TPK1          |
| YNL307C                                          | MCK1          | YKL110C                 | KTI12         |

| Predictions at threshold level 0.80 continued... |               |                         |               |
|--------------------------------------------------|---------------|-------------------------|---------------|
| Gene1 of predicted pair                          |               | Gene2 of predicted pair |               |
| Systematic Name                                  | Standard Name | Systematic Name         | Standard Name |
| YML115C                                          | VAN1          | YOR043W                 | WHI2          |
| YLR093C                                          | NYV1          | YOR036W                 | PEP12         |
| YDR335W                                          | MSN5          | YNL199C                 | GCR2          |
| YGL212W                                          | VAM7          | YJL183W                 | MNN11         |
| YBL008W                                          | HIR1          | YOR141C                 | ARP8          |
| YNL329C                                          | PEX6          | YHR013C                 | ARD1          |
| YOR106W                                          | VAM3          | YPL161C                 | BEM4          |
| YJL036W                                          | SNX4          | YCR066W                 | RAD18         |
| YLR396C                                          | VPS33         | YML001W                 | YPT7          |
| YKL116C                                          | PRR1          | YNL325C                 | FIG4          |
| YHR114W                                          | BZZ1          | YBR114W                 | RAD16         |
| YBR228W                                          | SLX1          | YOL030W                 | GAS5          |
| YBL047C                                          | EDE1          | YML071C                 | COG8          |
| YMR116C                                          | ASC1          | YJL124C                 | LSM1          |
| YEL053C                                          | MAK10         | YKR030W                 | GMH1          |
| YOR195W                                          | SLK19         | YFR030W                 | MET10         |
| YKL048C                                          | ELM1          | YJL095W                 | BCK1          |
| YJR060W                                          | CBF1          | YPL152W                 | RRD2          |
| YDL006W                                          | PTC1          | YJL095W                 | BCK1          |
| YML016C                                          | PPZ1          | YLR315W                 | NKP2          |
| YLR216C                                          | CPR6          | YDR363W-A               | SEM1          |
| YPL024W                                          | RMI1          | YLR371W                 | ROM2          |
| YBR171W                                          | SEC66         | YGL200C                 | EMP24         |
| YDR335W                                          | MSN5          | YHR111W                 | UBA4          |
| YER116C                                          | SLX8          | YML001W                 | YPT7          |
| YGL033W                                          | HOP2          | YCR053W                 | THR4          |
| YPL024W                                          | RMI1          | YIR002C                 | MPH1          |
| YDR261C                                          | EXG2          | YJL183W                 | MNN11         |
| YCL001W                                          | RER1          | YNL041C                 | COG6          |

| Predictions at threshold level 0.80 continued... |               |                         |               |
|--------------------------------------------------|---------------|-------------------------|---------------|
| Gene1 of predicted pair                          |               | Gene2 of predicted pair |               |
| Systematic Name                                  | Standard Name | Systematic Name         | Standard Name |
| YDR484W                                          | VPS52         | YMR230W                 | RPS10B        |
| YLR292C                                          | SEC72         | YBR171W                 | SEC66         |
| YNL044W                                          | YIP3          | YJL204C                 | RCY1          |
| YDL020C                                          | RPN4          | YGL151W                 | NUT1          |
| YLR360W                                          | VPS38         | YKR020W                 | VPS51         |
| YLR441C                                          | RPS1A         | YMR230W                 | RPS10B        |
| YBR041W                                          | FAT1          | YMR038C                 | CCS1          |
| YBL103C                                          | RTG3          | YOR290C                 | SNF2          |
| YNL206C                                          | RTT106        | YPL161C                 | BEM4          |
| YOR290C                                          | SNF2          | YBR171W                 | SEC66         |
| YNL058C                                          | YNL058C       | YJL095W                 | BCK1          |
| YJL183W                                          | MNN11         | YJR084W                 | CSN12         |
| YNL288W                                          | CAF40         | YIL038C                 | NOT3          |
| YFL023W                                          | BUD27         | YPL037C                 | EGD1          |
| YOR083W                                          | WHI5          | YBR215W                 | HPC2          |
| YHR134W                                          | WSS1          | YJR090C                 | GRR1          |
| YMR198W                                          | CIK1          | YNR052C                 | POP2          |
| YAL024C                                          | LTE1          | YBR030W                 | YBR030W       |
| YEL053C                                          | MAK10         | YBR114W                 | RAD16         |
| YFR010W                                          | UBP6          | YOL090W                 | MSH2          |
| YHR060W                                          | VMA22         | YMR230W                 | RPS10B        |
| YER144C                                          | UBP5          | YMR230W                 | RPS10B        |
| YKR035W-A                                        | DID2          | YOR043W                 | WHI2          |
| YIL008W                                          | URM1          | YJR090C                 | GRR1          |
| YAL010C                                          | MDM10         | YGL163C                 | RAD54         |
| YKL007W                                          | CAP1          | YPL256C                 | CLN2          |
| YHR134W                                          | WSS1          | YAR014C                 | BUD14         |
| YPL253C                                          | VIK1          | YEL056W                 | HAT2          |
| YML016C                                          | PPZ1          | YBR114W                 | RAD16         |



| Predictions at threshold level 0.80 continued... |               |                         |               |
|--------------------------------------------------|---------------|-------------------------|---------------|
| Gene1 of predicted pair                          |               | Gene2 of predicted pair |               |
| Systematic Name                                  | Standard Name | Systematic Name         | Standard Name |
| YDR289C                                          | RTT103        | YGL253W                 | HXK2          |
| YOR275C                                          | RIM20         | YDR310C                 | SUM1          |
| YPL256C                                          | CLN2          | YGL003C                 | CDH1          |
| YEL053C                                          | MAK10         | YNL051W                 | COG5          |
| YNL291C                                          | MID1          | YLR381W                 | CTF3          |
| YDR383C                                          | NKP1          | YDR289C                 | RTT103        |
| YNL291C                                          | MID1          | YNL238W                 | KEX2          |
| YKR001C                                          | VPS1          | YLR396C                 | VPS33         |
| YGL078C                                          | DBP3          | YGL115W                 | SNF4          |
| YMR116C                                          | ASC1          | YNR052C                 | POP2          |
| YMR080C                                          | NAM7          | YBR017C                 | KAP104        |
| YBR171W                                          | SEC66         | YJR090C                 | GRR1          |
| YPL240C                                          | HSP82         | YJR159W                 | SOR1          |
| YIL159W                                          | BNR1          | YMR153W                 | NUP53         |
| YIL008W                                          | URM1          | YKL101W                 | HSL1          |
| YDR477W                                          | SNF1          | YHR060W                 | VMA22         |
| YGR072W                                          | UPF3          | YGR261C                 | APL6          |
| YIL036W                                          | CST6          | YJR135C                 | MCM22         |
| YPR131C                                          | NAT3          | YDR200C                 | VPS64         |
| YKL139W                                          | CTK1          | YPR046W                 | MCM16         |
| YKR099W                                          | BAS1          | YMR230W                 | RPS10B        |
| YKR061W                                          | KTR2          | YOL081W                 | IRA2          |
| YPR173C                                          | VPS4          | YDL226C                 | GCS1          |
| YDL223C                                          | HBT1          | YHR060W                 | VMA22         |
| YPL022W                                          | RAD1          | YJR135C                 | MCM22         |
| YPL195W                                          | APL5          | YEL060C                 | PRB1          |
| YGL237C                                          | HAP2          | YDR318W                 | MCM21         |
| YDR254W                                          | CHL4          | YDR289C                 | RTT103        |
| YGR020C                                          | VMA7          | YNR032W                 | PPG1          |

| Predictions at threshold level 0.80 continued... |               |                         |               |
|--------------------------------------------------|---------------|-------------------------|---------------|
| Gene1 of predicted pair                          |               | Gene2 of predicted pair |               |
| Systematic Name                                  | Standard Name | Systematic Name         | Standard Name |
| YLR061W                                          | RPL22A        | YJL095W                 | BCK1          |
| YIL076W                                          | SEC28         | YDL223C                 | HBT1          |
| YPL234C                                          | TFP3          | YLR370C                 | ARC18         |
| YGL087C                                          | MMS2          | YHR134W                 | WSS1          |
| YER116C                                          | SLX8          | YNL041C                 | COG6          |
| YML095C                                          | RAD10         | YJL095W                 | BCK1          |
| YJL136C                                          | RPS21B        | YPL161C                 | BEM4          |
| YIL008W                                          | URM1          | YDR264C                 | AKR1          |
| YER110C                                          | KAP123        | YCR086W                 | CSM1          |
| YDL020C                                          | RPN4          | YDL190C                 | UFD2          |
| YPR131C                                          | NAT3          | YNL107W                 | YAF9          |
| YPL022W                                          | RAD1          | YMR201C                 | RAD14         |
| YPL147W                                          | PXA1          | YKL188C                 | PXA2          |
| YKR001C                                          | VPS1          | YML038C                 | YMD8          |
| YLR018C                                          | POM34         | YKR024C                 | DBP7          |
| YML001W                                          | YPT7          | YDL192W                 | ARF1          |
| YHR039C-A                                        | VMA10         | YJL183W                 | MNN11         |
| YOR275C                                          | RIM20         | YMR022W                 | UBC7          |
| YML103C                                          | NUP188        | YDR207C                 | UME6          |
| YPL105C                                          | YPL105C       | YAR014C                 | BUD14         |
| YGL174W                                          | BUD13         | YNL199C                 | GCR2          |
| YPL161C                                          | BEM4          | YNL051W                 | COG5          |
| YML095C                                          | RAD10         | YOR358W                 | HAP5          |
| YBR194W                                          | SOY1          | YOR308C                 | SNU66         |
| YBR107C                                          | IML3          | YNL236W                 | SIN4          |
| YBL058W                                          | SHP1          | YPL161C                 | BEM4          |
| YLR090W                                          | XDJ1          | YGL147C                 | RPL9A         |
| YNR052C                                          | POP2          | YLR313C                 | SPH1          |
| YIL159W                                          | BNR1          | YKL129C                 | MYO3          |

| Predictions at threshold level 0.80 continued... |               |                         |               |
|--------------------------------------------------|---------------|-------------------------|---------------|
| Gene1 of predicted pair                          |               | Gene2 of predicted pair |               |
| Systematic Name                                  | Standard Name | Systematic Name         | Standard Name |
| YER139C                                          | YER139C       | YER040W                 | GLN3          |
| YOR132W                                          | VPS17         | YOL067C                 | RTG1          |
| YPL037C                                          | EGD1          | YHR060W                 | VMA22         |
| YOR358W                                          | HAP5          | YDR310C                 | SUM1          |
| YNL288W                                          | CAF40         | YER110C                 | KAP123        |
| YCL037C                                          | SRO9          | YPL234C                 | TFP3          |
| YOR129C                                          | YOR129C       | YNL225C                 | CNM67         |
| YNL307C                                          | MCK1          | YDR254W                 | CHL4          |
| YNL206C                                          | RTT106        | YMR038C                 | CCS1          |
| YLR288C                                          | MEC3          | YJR090C                 | GRR1          |
| YFL023W                                          | BUD27         | YNR072W                 | HXT17         |
| YOL052C-A                                        | DDR2          | YPL240C                 | HSP82         |
| YBL103C                                          | RTG3          | YER122C                 | GLO3          |
| YGL212W                                          | VAM7          | YOR109W                 | INP53         |
| YDR174W                                          | HMO1          | YNL307C                 | MCK1          |
| YGR072W                                          | UPF3          | YJR033C                 | RAV1          |
| YKL110C                                          | KTI12         | YHR187W                 | IKI1          |
| YPL161C                                          | BEM4          | YDL047W                 | SIT4          |
| YBR194W                                          | SOY1          | YPL106C                 | SSE1          |
| YCR066W                                          | RAD18         | YNL041C                 | COG6          |
| YOR085W                                          | OST3          | YEL036C                 | ANP1          |
| YER116C                                          | SLX8          | YGL031C                 | RPL24A        |
| YGR270W                                          | YTA7          | YKL213C                 | DOA1          |
| YBR108W                                          | YBR108W       | YER044C                 | ERG28         |
| YDL223C                                          | HBT1          | YKR035W-A               | DID2          |
| YJL154C                                          | VPS35         | YOL067C                 | RTG1          |
| YGR081C                                          | SLX9          | YLR352W                 | YLR352W       |
| YKL116C                                          | PRR1          | YLR441C                 | RPS1A         |
| YGL223C                                          | COG1          | YPR032W                 | SRO7          |

| Predictions at threshold level 0.80 continued... |               |                         |               |
|--------------------------------------------------|---------------|-------------------------|---------------|
| Gene1 of predicted pair                          |               | Gene2 of predicted pair |               |
| Systematic Name                                  | Standard Name | Systematic Name         | Standard Name |
| YLR381W                                          | CTF3          | YJL058C                 | BIT61         |
| YLR371W                                          | ROM2          | YBL101C                 | ECM21         |
| YDR439W                                          | LRS4          | YDR183W                 | PLP1          |
| YMR198W                                          | CIK1          | YOR195W                 | SLK19         |
| YPL024W                                          | RMI1          | YJL176C                 | SWI3          |
| YNL025C                                          | SSN8          | YJR140C                 | HIR3          |
| YLR360W                                          | VPS38         | YNL199C                 | GCR2          |
| YLR095C                                          | IOC2          | YMR224C                 | MRE11         |
| YPR036W                                          | VMA13         | YHR039C-A               | VMA10         |
| YLR441C                                          | RPS1A         | YDR358W                 | GGA1          |
| YBR194W                                          | SOY1          | YKL041W                 | VPS24         |
| YOR195W                                          | SLK19         | YJL058C                 | BIT61         |
| YOR008C                                          | SLG1          | YJL129C                 | TRK1          |
| YDL116W                                          | NUP84         | YNL116W                 | DMA2          |
| YPL042C                                          | SSN3          | YPR120C                 | CLB5          |
| YBR215W                                          | HPC2          | YIR005W                 | IST3          |
| YGL087C                                          | MMS2          | YPR120C                 | CLB5          |
| YDR477W                                          | SNF1          | YER044C                 | ERG28         |
| YNL307C                                          | MCK1          | YBL047C                 | EDE1          |
| YHR156C                                          | LIN1          | YML001W                 | YPT7          |
| YBR030W                                          | YBR030W       | YJL095W                 | BCK1          |
| YBR036C                                          | CSG2          | YLR180W                 | SAM1          |
| YBR171W                                          | SEC66         | YDR318W                 | MCM21         |
| YDL227C                                          | HO            | YER143W                 | DDI1          |
| YIL159W                                          | BNR1          | YDR507C                 | GIN4          |
| YNL297C                                          | MON2          | YML071C                 | COG8          |
| YMR055C                                          | BUB2          | YJL006C                 | CTK2          |
| YGL212W                                          | VAM7          | YKR099W                 | BAS1          |
| YDL223C                                          | HBT1          | YDL083C                 | RPS16B        |

| Predictions at threshold level 0.80 continued... |               |                         |               |
|--------------------------------------------------|---------------|-------------------------|---------------|
| Gene1 of predicted pair                          |               | Gene2 of predicted pair |               |
| Systematic Name                                  | Standard Name | Systematic Name         | Standard Name |
| YLR181C                                          | VTA1          | YOR275C                 | RIM20         |
| YHR013C                                          | ARD1          | YGR188C                 | BUB1          |
| YLR109W                                          | AHP1          | YGR209C                 | TRX2          |
| YJL187C                                          | SWE1          | YMR038C                 | CCS1          |
| YHL025W                                          | SNF6          | YDR073W                 | SNF11         |
| YLR095C                                          | IOC2          | YLR192C                 | HCR1          |
| YPL024W                                          | RMI1          | YGL033W                 | HOP2          |
| YOR069W                                          | VPS5          | YOL108C                 | INO4          |
| YKL135C                                          | APL2          | YOR327C                 | SNC2          |
| YDR289C                                          | RTT103        | YHR167W                 | THP2          |
| YER001W                                          | MNN1          | YGR135W                 | PRE9          |
| YLR381W                                          | CTF3          | YNL225C                 | CNM67         |
| YDR083W                                          | RRP8          | YOR145C                 | PNO1          |
| YOR132W                                          | VPS17         | YOR109W                 | INP53         |
| YER054C                                          | GIP2          | YAR014C                 | BUD14         |
| YDL155W                                          | CLB3          | YDR200C                 | VPS64         |
| YOR043W                                          | WHI2          | YOR327C                 | SNC2          |
| YGL025C                                          | PGD1          | YOR035C                 | SHE4          |
| YNL106C                                          | INP52         | YHR115C                 | DMA1          |
| YER120W                                          | SCS2          | YOL018C                 | TLG2          |
| YGR178C                                          | PBP1          | YPR119W                 | CLB2          |
| YLR079W                                          | SIC1          | YDL155W                 | CLB3          |
| YDR443C                                          | SSN2          | YJR032W                 | CPR7          |
| YJL172W                                          | CPS1          | YOR327C                 | SNC2          |
| YML016C                                          | PPZ1          | YLR371W                 | ROM2          |
| YMR055C                                          | BUB2          | YJL190C                 | RPS22A        |
| YMR153W                                          | NUP53         | YER144C                 | UBP5          |
| YOR023C                                          | AHC1          | YNL166C                 | BNI5          |
| YGL147C                                          | RPL9A         | YNL325C                 | FIG4          |

| Predictions at threshold level 0.80 continued... |               |                         |               |
|--------------------------------------------------|---------------|-------------------------|---------------|
| Gene1 of predicted pair                          |               | Gene2 of predicted pair |               |
| Systematic Name                                  | Standard Name | Systematic Name         | Standard Name |
| YIL156W                                          | UBP7          | YML057W                 | CMP2          |
| YIL034C                                          | CAP2          | YDR310C                 | SUM1          |
| YDL020C                                          | RPN4          | YOR195W                 | SLK19         |
| YLR337C                                          | VRP1          | YML095C                 | RAD10         |
| YJL183W                                          | MNN11         | YGR188C                 | BUB1          |
| YDR156W                                          | RPA14         | YMR116C                 | ASC1          |
| YBR200W                                          | BEM1          | YJR135C                 | MCM22         |
| YDL005C                                          | MED2          | YGL151W                 | NUT1          |
| YGR241C                                          | YAP1802       | YBL017C                 | PEP1          |
| YNL201C                                          | PSY2          | YNL107W                 | YAF9          |
| YBR171W                                          | SEC66         | YHR081W                 | LRP1          |
| YLR083C                                          | EMP70         | YCL037C                 | SRO9          |
| YLR315W                                          | NKP2          | YOR141C                 | ARP8          |
| YLR192C                                          | HCR1          | YMR153W                 | NUP53         |
| YDR422C                                          | SIP1          | YDR028C                 | REG1          |
| YLR234W                                          | TOP3          | YLR386W                 | VAC14         |
| YNL264C                                          | PDR17         | YGL223C                 | COG1          |
| YLR399C                                          | BDF1          | YGL019W                 | CKB1          |
| YKR059W                                          | TIF1          | YMR055C                 | BUB2          |
| YCR020C-A                                        | MAK31         | YML001W                 | YPT7          |
| YLR148W                                          | PEP3          | YLR396C                 | VPS33         |
| YGR261C                                          | APL6          | YAR014C                 | BUD14         |
| YBR057C                                          | MUM2          | YPR046W                 | MCM16         |
| YBR041W                                          | FAT1          | YMR152W                 | YIM1          |
| YIL159W                                          | BNR1          | YER144C                 | UBP5          |
| YPR051W                                          | MAK3          | YPL161C                 | BEM4          |
| YGR072W                                          | UPF3          | YGR105W                 | VMA21         |
| YOR080W                                          | DIA2          | YER116C                 | SLX8          |
| YMR127C                                          | SAS2          | YDR144C                 | MKC7          |

| Predictions at threshold level 0.80 continued... |               |                         |               |
|--------------------------------------------------|---------------|-------------------------|---------------|
| Gene1 of predicted pair                          |               | Gene2 of predicted pair |               |
| Systematic Name                                  | Standard Name | Systematic Name         | Standard Name |
| YDR108W                                          | GSG1          | YGL212W                 | VAM7          |
| YCL001W                                          | RER1          | YML012W                 | ERV25         |
| YER110C                                          | KAP123        | YGR252W                 | GCN5          |
| YDL160C                                          | DHH1          | YDR192C                 | NUP42         |
| YHR200W                                          | RPN10         | YDR264C                 | AKR1          |
| YJR140C                                          | HIR3          | YGR188C                 | BUB1          |
| YGL212W                                          | VAM7          | YPR030W                 | CSR2          |
| YHR129C                                          | ARP1          | YGL190C                 | CDC55         |
| YER114C                                          | BOI2          | YCR077C                 | PAT1          |
| YJR140C                                          | HIR3          | YMR167W                 | MLH1          |
| YJL095W                                          | BCK1          | YKL041W                 | VPS24         |
| YNL297C                                          | MON2          | YNL127W                 | FAR11         |
| YBR274W                                          | CHK1          | YOR368W                 | RAD17         |
| YLR192C                                          | HCR1          | YGL212W                 | VAM7          |
| YLR102C                                          | APC9          | YPL161C                 | BEM4          |
| YPR018W                                          | RLF2          | YML095C                 | RAD10         |
| YNL291C                                          | MID1          | YMR167W                 | MLH1          |
| YDR213W                                          | UPC2          | YBR127C                 | VMA2          |
| YIL053W                                          | RHR2          | YBR280C                 | SAF1          |
| YJL172W                                          | CPS1          | YGL212W                 | VAM7          |
| YOR069W                                          | VPS5          | YGL223C                 | COG1          |
| YOR127W                                          | RGA1          | YLR309C                 | IMH1          |
| YBL072C                                          | RPS8A         | YDR207C                 | UME6          |
| YGL178W                                          | MPT5          | YLR384C                 | IKI3          |
| YNL058C                                          | YNL058C       | YOR043W                 | WHI2          |
| YJR010C-A                                        | SPC1          | YJL128C                 | PBS2          |
| YKR072C                                          | SIS2          | YLR410W                 | VIP1          |
| YDL020C                                          | RPN4          | YDR318W                 | MCM21         |
| YLR371W                                          | ROM2          | YER122C                 | GLO3          |

| Predictions at threshold level 0.80 continued... |               |                         |               |
|--------------------------------------------------|---------------|-------------------------|---------------|
| Gene1 of predicted pair                          |               | Gene2 of predicted pair |               |
| Systematic Name                                  | Standard Name | Systematic Name         | Standard Name |
| YLR452C                                          | SST2          | YLR094C                 | GIS3          |
| YHR108W                                          | GGA2          | YKL161C                 | YKL161C       |
| YLR119W                                          | SRN2          | YIL076W                 | SEC28         |
| YPR018W                                          | RLF2          | YHR200W                 | RPN10         |
| YGR261C                                          | APL6          | YKL135C                 | APL2          |
| YJR090C                                          | GRR1          | YEL056W                 | HAT2          |
| YML095C                                          | RAD10         | YKL032C                 | IXR1          |
| YJL127C                                          | SPT10         | YMR179W                 | SPT21         |
| YBR171W                                          | SEC66         | YOL081W                 | IRA2          |
| YEL051W                                          | VMA8          | YDR153C                 | ENT5          |
| YDL160C                                          | DHH1          | YGL208W                 | SIP2          |
| YDR176W                                          | NGG1          | YGL013C                 | PDR1          |
| YOR290C                                          | SNF2          | YPR030W                 | CSR2          |
| YGL133W                                          | ITC1          | YBR084C-A               | RPL19A        |
| YLR234W                                          | TOP3          | YGL250W                 | RMR1          |
| YLR058C                                          | SHM2          | YNL107W                 | YAF9          |
| YPR171W                                          | BSP1          | YKL213C                 | DOA1          |
| YMR026C                                          | PEX12         | YNL307C                 | MCK1          |
| YBR200W                                          | BEM1          | YLR441C                 | RPS1A         |
| YKL032C                                          | IXR1          | YJL095W                 | BCK1          |
| YOR080W                                          | DIA2          | YGR270W                 | YTA7          |
| YPL105C                                          | YPL105C       | YCL001W                 | RER1          |
| YHR161C                                          | YAP1801       | YDL226C                 | GCS1          |
| YBR108W                                          | YBR108W       | YMR109W                 | MYO5          |
| YDR004W                                          | RAD57         | YDR207C                 | UME6          |
| YBL078C                                          | ATG8          | YLR043C                 | TRX1          |
| YBR171W                                          | SEC66         | YGL253W                 | HXK2          |
| YDR293C                                          | SSD1          | YLR386W                 | VAC14         |
| YGL147C                                          | RPL9A         | YBL103C                 | RTG3          |



| Predictions at threshold level 0.80 continued... |               |                         |               |
|--------------------------------------------------|---------------|-------------------------|---------------|
| Gene1 of predicted pair                          |               | Gene2 of predicted pair |               |
| Systematic Name                                  | Standard Name | Systematic Name         | Standard Name |
| YER120W                                          | SCS2          | YNL238W                 | KEX2          |
| YOR191W                                          | RIS1          | YPL057C                 | SUR1          |
| YHR056C                                          | RSC30         | YCL016C                 | DCC1          |
| YHR060W                                          | VMA22         | YBR019C                 | GAL10         |
| YGR252W                                          | GCN5          | YOR141C                 | ARP8          |
| YDR363W-A                                        | SEM1          | YLR357W                 | RSC2          |
| YJL183W                                          | MNN11         | YGL124C                 | MON1          |
| YER016W                                          | BIM1          | YIL033C                 | BCY1          |
| YLR234W                                          | TOP3          | YOR195W                 | SLK19         |
| YLR337C                                          | VRP1          | YGL161C                 | YIP5          |
| YCL037C                                          | SRO9          | YGL115W                 | SNF4          |
| YNL243W                                          | SLA2          | YGR229C                 | SMI1          |
| YMR153W                                          | NUP53         | YKR099W                 | BAS1          |
| YKL006W                                          | RPL14A        | YPL213W                 | LEA1          |
| YPL024W                                          | RMI1          | YEL056W                 | HAT2          |
| YKL116C                                          | PRR1          | YPL037C                 | EGD1          |
| YGL135W                                          | RPL1B         | YKL041W                 | VPS24         |
| YNL243W                                          | SLA2          | YNL084C                 | END3          |
| YFR010W                                          | UBP6          | YLR421C                 | RPN13         |
| YML001W                                          | YPT7          | YPL195W                 | APL5          |
| YBR200W                                          | BEM1          | YHR115C                 | DMA1          |
| YNL041C                                          | COG6          | YJR032W                 | CPR7          |
| YMR125W                                          | STO1          | YDL047W                 | SIT4          |
| YLR303W                                          | MET17         | YNR065C                 | YNR065C       |
| YER120W                                          | SCS2          | YPL120W                 | VPS30         |
| YDL116W                                          | NUP84         | YMR116C                 | ASC1          |
| YGL212W                                          | VAM7          | YNL297C                 | MON2          |
| YDL160C                                          | DHH1          | YDL047W                 | SIT4          |
| YML112W                                          | CTK3          | YGR188C                 | BUB1          |

| Predictions at threshold level 0.80 continued... |               |                         |               |
|--------------------------------------------------|---------------|-------------------------|---------------|
| Gene1 of predicted pair                          |               | Gene2 of predicted pair |               |
| Systematic Name                                  | Standard Name | Systematic Name         | Standard Name |
| YPL001W                                          | HAT1          | YLL022C                 | HIF1          |
| YNL041C                                          | COG6          | YAL002W                 | VPS8          |
| YFR031C-A                                        | RPL2A         | YDR261C                 | EXG2          |
| YNL032W                                          | SIW14         | YCR053W                 | THR4          |
| YGL003C                                          | CDH1          | YJL095W                 | BCK1          |
| YOL111C                                          | MDY2          | YLR452C                 | SST2          |
| YEL065W                                          | SIT1          | YPL137C                 | GIP3          |
| YKL110C                                          | KTI12         | YPR120C                 | CLB5          |
| YML115C                                          | VAN1          | YDR378C                 | LSM6          |
| YIL076W                                          | SEC28         | YPL137C                 | GIP3          |
| YNL032W                                          | SIW14         | YFL023W                 | BUD27         |
| YKL126W                                          | YPK1          | YDR137W                 | RGP1          |
| YLR337C                                          | VRP1          | YDR254W                 | CHL4          |
| YML001W                                          | YPT7          | YJR084W                 | CSN12         |
| YGR078C                                          | PAC10         | YGL190C                 | CDC55         |
| YLR320W                                          | MMS22         | YJL095W                 | BCK1          |
| YIL159W                                          | BNR1          | YAL020C                 | ATS1          |
| YLR303W                                          | MET17         | YOL126C                 | MDH2          |
| YLR192C                                          | HCR1          | YER040W                 | GLN3          |
| YBR200W                                          | BEM1          | YOR275C                 | RIM20         |
| YHR039C-A                                        | VMA10         | YFR036W                 | CDC26         |
| YLR288C                                          | MEC3          | YDR310C                 | SUM1          |
| YLR360W                                          | VPS38         | YGL212W                 | VAM7          |
| YDR439W                                          | LRS4          | YPR046W                 | MCM16         |
| YER001W                                          | MNN1          | YOR312C                 | RPL20B        |
| YGR020C                                          | VMA7          | YPL161C                 | BEM4          |
| YIL159W                                          | BNR1          | YMR202W                 | ERG2          |
| YKL126W                                          | YPK1          | YER040W                 | GLN3          |
| YHR013C                                          | ARD1          | YJR060W                 | CBF1          |

| Predictions at threshold level 0.80 continued... |               |                         |               |
|--------------------------------------------------|---------------|-------------------------|---------------|
| Gene1 of predicted pair                          |               | Gene2 of predicted pair |               |
| Systematic Name                                  | Standard Name | Systematic Name         | Standard Name |
| YOR054C                                          | VHS3          | YPL240C                 | HSP82         |
| YCR086W                                          | CSM1          | YOR368W                 | RAD17         |
| YJL176C                                          | SWI3          | YMR091C                 | NPL6          |
| YIL034C                                          | CAP2          | YKR048C                 | NAP1          |
| YKL025C                                          | PAN3          | YGR054W                 | YGR054W       |
| YPL180W                                          | TCO89         | YKL041W                 | VPS24         |
| YJR059W                                          | PTK2          | YFL047W                 | RGD2          |
| YIL034C                                          | CAP2          | YBR171W                 | SEC66         |
| YPL022W                                          | RAD1          | YDR071C                 | PAA1          |
| YML115C                                          | VAN1          | YJR032W                 | CPR7          |
| YBR173C                                          | UMP1          | YDR137W                 | RGP1          |
| YBR200W                                          | BEM1          | YJL157C                 | FAR1          |
| YOR035C                                          | SHE4          | YAL030W                 | SNC1          |
| YBR200W                                          | BEM1          | YLR429W                 | CRN1          |
| YNL243W                                          | SLA2          | YOR033C                 | EXO1          |
| YFL023W                                          | BUD27         | YLR094C                 | GIS3          |
| YFR031C-A                                        | RPL2A         | YNL041C                 | COG6          |
| YKR099W                                          | BAS1          | YPL161C                 | BEM4          |
| YDL020C                                          | RPN4          | YBR127C                 | VMA2          |
| YJL136C                                          | RPS21B        | YNL116W                 | DMA2          |
| YHR039C-A                                        | VMA10         | YOR035C                 | SHE4          |
| YJR090C                                          | GRR1          | YHR114W                 | BZZ1          |
| YDR440W                                          | DOT1          | YER139C                 | YER139C       |
| YDR484W                                          | VPS52         | YDR261C                 | EXG2          |
| YLR386W                                          | VAC14         | YBL047C                 | EDE1          |
| YMR153W                                          | NUP53         | YPL057C                 | SUR1          |
| YOR008C                                          | SLG1          | YNL031C                 | HHT2          |
| YCL001W                                          | RER1          | YER120W                 | SCS2          |
| YER116C                                          | SLX8          | YMR038C                 | CCS1          |

| Predictions at threshold level 0.80 continued... |               |                         |               |
|--------------------------------------------------|---------------|-------------------------|---------------|
| Gene1 of predicted pair                          |               | Gene2 of predicted pair |               |
| Systematic Name                                  | Standard Name | Systematic Name         | Standard Name |
| YPR120C                                          | CLB5          | YEL056W                 | HAT2          |
| YIR003W                                          | YIR003W       | YDR310C                 | SUM1          |
| YKL048C                                          | ELM1          | YNL079C                 | TPM1          |
| YNL307C                                          | MCK1          | YLR371W                 | ROM2          |
| YOR080W                                          | DIA2          | YOR124C                 | UBP2          |
| YMR284W                                          | YKU70         | YJR035W                 | RAD26         |
| YLR288C                                          | MEC3          | YBR215W                 | HPC2          |
| YER162C                                          | RAD4          | YMR311C                 | GLC8          |
| YPL195W                                          | APL5          | YKR030W                 | GMH1          |
| YKL139W                                          | CTK1          | YJR056C                 | YJR056C       |
| YPR131C                                          | NAT3          | YDR318W                 | MCM21         |
| YDL083C                                          | RPS16B        | YBR036C                 | CSG2          |
| YJL006C                                          | CTK2          | YBL101C                 | ECM21         |
| YNL139C                                          | RLR1          | YML062C                 | MFT1          |
| YJR060W                                          | CBF1          | YJL006C                 | CTK2          |
| YCR086W                                          | CSM1          | YOL054W                 | PSH1          |
| YMR109W                                          | MYO5          | YLR447C                 | VMA6          |
| YHR060W                                          | VMA22         | YDR153C                 | ENT5          |
| YJL036W                                          | SNX4          | YML001W                 | YPT7          |
| YJL172W                                          | CPS1          | YNL058C                 | YNL058C       |
| YIL008W                                          | URM1          | YDR155C                 | CPR1          |
| YLR452C                                          | SST2          | YJL183W                 | MNN11         |
| YDR225W                                          | HTA1          | YFR010W                 | UBP6          |
| YOR109W                                          | INP53         | YGL054C                 | ERV14         |
| YIL076W                                          | SEC28         | YML038C                 | YMD8          |
| YDR293C                                          | SSD1          | YIL133C                 | RPL16A        |
| YPL057C                                          | SUR1          | YNL058C                 | YNL058C       |
| YAL024C                                          | LTE1          | YNL325C                 | FIG4          |
| YJL124C                                          | LSM1          | YPL253C                 | VIK1          |

| Predictions at threshold level 0.80 continued... |               |                         |               |
|--------------------------------------------------|---------------|-------------------------|---------------|
| Gene1 of predicted pair                          |               | Gene2 of predicted pair |               |
| Systematic Name                                  | Standard Name | Systematic Name         | Standard Name |
| YLL007C                                          | YLL007C       | YLR386W                 | VAC14         |
| YDR480W                                          | DIG2          | YBR083W                 | TEC1          |
| YCR002C                                          | CDC10         | YPL161C                 | BEM4          |
| YDR004W                                          | RAD57         | YNL206C                 | RTT106        |
| YHR114W                                          | BZZ1          | YPR119W                 | CLB2          |
| YHR039C-A                                        | VMA10         | YGL003C                 | CDH1          |
| YGR104C                                          | SRB5          | YLR079W                 | SIC1          |
| YLR095C                                          | IOC2          | YLR093C                 | NYV1          |
| YDL077C                                          | VAM6          | YOL108C                 | INO4          |
| YIL008W                                          | URM1          | YHR012W                 | VPS29         |
| YOR195W                                          | SLK19         | YNL107W                 | YAF9          |
| YBL058W                                          | SHP1          | YBR217W                 | ATG12         |
| YOR337W                                          | TEA1          | YMR142C                 | RPL13B        |
| YBR194W                                          | SOY1          | YPL180W                 | TCO89         |
| YJL095W                                          | BCK1          | YER049W                 | TPA1          |
| YBR200W                                          | BEM1          | YPR030W                 | CSR2          |
| YER144C                                          | UBP5          | YPR036W                 | VMA13         |
| YGR072W                                          | UPF3          | YPL161C                 | BEM4          |
| YBR289W                                          | SNF5          | YHL025W                 | SNF6          |
| YIL076W                                          | SEC28         | YLR180W                 | SAM1          |
| YPL161C                                          | BEM4          | YBL072C                 | RPS8A         |
| YAL024C                                          | LTE1          | YFL023W                 | BUD27         |
| YJR033C                                          | RAV1          | YNL107W                 | YAF9          |
| YML109W                                          | ZDS2          | YBL085W                 | BOI1          |
| YJR135C                                          | MCM22         | YPR046W                 | MCM16         |
| YLR234W                                          | TOP3          | YLR352W                 | YLR352W       |
| YHR013C                                          | ARD1          | YGR270W                 | YTA7          |
| YML115C                                          | VAN1          | YKL032C                 | IXR1          |
| YJL004C                                          | SYS1          | YPR032W                 | SRO7          |

| Predictions at threshold level 0.80 continued... |               |                         |               |
|--------------------------------------------------|---------------|-------------------------|---------------|
| Gene1 of predicted pair                          |               | Gene2 of predicted pair |               |
| Systematic Name                                  | Standard Name | Systematic Name         | Standard Name |
| YHR134W                                          | WSS1          | YGL124C                 | MON1          |
| YOR290C                                          | SNF2          | YLR182W                 | SWI6          |
| YDR378C                                          | LSM6          | YKL213C                 | DOA1          |
| YNL068C                                          | FKH2          | YML095C                 | RAD10         |
| YPR017C                                          | DSS4          | YOR327C                 | SNC2          |
| YBR274W                                          | CHK1          | YMR167W                 | MLH1          |
| YLR234W                                          | TOP3          | YPL018W                 | CTF19         |
| YNL032W                                          | SIW14         | YDL077C                 | VAM6          |
| YNL025C                                          | SSN8          | YER161C                 | SPT2          |
| YLR410W                                          | VIP1          | YML028W                 | TSA1          |
| YGL223C                                          | COG1          | YPL161C                 | BEM4          |
| YFR031C-A                                        | RPL2A         | YBR036C                 | CSG2          |
| YKR059W                                          | TIF1          | YGR054W                 | YGR054W       |
| YLR386W                                          | VAC14         | YHR060W                 | VMA22         |
| YCL001W                                          | RER1          | YFL048C                 | EMP47         |
| YPR119W                                          | CLB2          | YOL108C                 | INO4          |
| YGL147C                                          | RPL9A         | YMR142C                 | RPL13B        |
| YKR057W                                          | RPS21A        | YGL031C                 | RPL24A        |
| YHR086W                                          | NAM8          | YDR110W                 | FOB1          |
| YOR327C                                          | SNC2          | YJL164C                 | TPK1          |
| YBL047C                                          | EDE1          | YMR089C                 | YTA12         |
| YDR004W                                          | RAD57         | YGR184C                 | UBR1          |
| YJR135C                                          | MCM22         | YNL225C                 | CNM67         |
| YDR004W                                          | RAD57         | YFL023W                 | BUD27         |
| YHR161C                                          | YAP1801       | YFL026W                 | STE2          |
| YDR146C                                          | SWI5          | YGL151W                 | NUT1          |
| YKL164C                                          | PIR1          | YKL114C                 | APN1          |
| YMR201C                                          | RAD14         | YOL090W                 | MSH2          |
| YKL126W                                          | YPK1          | YBR171W                 | SEC66         |

| Predictions at threshold level 0.80 continued... |               |                         |               |
|--------------------------------------------------|---------------|-------------------------|---------------|
| Gene1 of predicted pair                          |               | Gene2 of predicted pair |               |
| Systematic Name                                  | Standard Name | Systematic Name         | Standard Name |
| YKL048C                                          | ELM1          | YDR358W                 | GGA1          |
| YFR010W                                          | UBP6          | YDR358W                 | GGA1          |
| YBL103C                                          | RTG3          | YOR208W                 | PTP2          |
| YDR137W                                          | RGP1          | YKL048C                 | ELM1          |
| YBR131W                                          | CCZ1          | YKR020W                 | VPS51         |
| YBR107C                                          | IML3          | YNL116W                 | DMA2          |
| YGR014W                                          | MSB2          | YDR363W-A               | SEM1          |
| YBR009C                                          | HHF1          | YOR038C                 | HIR2          |
| YOL126C                                          | MDH2          | YMR273C                 | ZDS1          |
| YJR005W                                          | APL1          | YKL114C                 | APN1          |
| YFL044C                                          | OTU1          | YPR149W                 | NCE102        |
| YNR032W                                          | PPG1          | YOL108C                 | INO4          |
| YPL057C                                          | SUR1          | YDR318W                 | MCM21         |
| YMR133W                                          | REC114        | YDL077C                 | VAM6          |
| YGL078C                                          | DBP3          | YMR230W                 | RPS10B        |
| YDL116W                                          | NUP84         | YGL200C                 | EMP24         |
| YBR279W                                          | PAF1          | YGL094C                 | PAN2          |
| YHR012W                                          | VPS29         | YDR289C                 | RTT103        |
| YPL161C                                          | BEM4          | YOL018C                 | TLG2          |
| YKL116C                                          | PRR1          | YML001W                 | YPT7          |
| YDR155C                                          | CPR1          | YEL056W                 | HAT2          |
| YGR105W                                          | VMA21         | YDL077C                 | VAM6          |
| YER161C                                          | SPT2          | YNL107W                 | YAF9          |
| YPL234C                                          | TFP3          | YKL041W                 | VPS24         |
| YER124C                                          | DSE1          | YBL085W                 | BOI1          |
| YNL078W                                          | NIS1          | YBL085W                 | BOI1          |
| YMR026C                                          | PEX12         | YKL126W                 | YPK1          |
| YNL288W                                          | CAF40         | YPR046W                 | MCM16         |
| YOR069W                                          | VPS5          | YML001W                 | YPT7          |

| Predictions at threshold level 0.80 continued... |               |                         |               |
|--------------------------------------------------|---------------|-------------------------|---------------|
| Gene1 of predicted pair                          |               | Gene2 of predicted pair |               |
| Systematic Name                                  | Standard Name | Systematic Name         | Standard Name |
| YDR293C                                          | SSD1          | YPR046W                 | MCM16         |
| YDL155W                                          | CLB3          | YAR014C                 | BUD14         |
| YJL183W                                          | MNN11         | YMR311C                 | GLC8          |
| YNL127W                                          | FAR11         | YJR033C                 | RAV1          |
| YOR023C                                          | AHC1          | YPR046W                 | MCM16         |
| YKR061W                                          | KTR2          | YIL103W                 | DPH1          |
| YBR030W                                          | YBR030W       | YOR066W                 | MSA1          |
| YML115C                                          | VAN1          | YLR093C                 | NYV1          |
| YKR059W                                          | TIF1          | YML115C                 | VAN1          |
| YMR198W                                          | CIK1          | YDL155W                 | CLB3          |
| YFR010W                                          | UBP6          | YLR315W                 | NKP2          |
| YGR217W                                          | CCH1          | YLR371W                 | ROM2          |
| YPL161C                                          | BEM4          | YGL253W                 | HXK2          |
| YLR371W                                          | ROM2          | YOR327C                 | SNC2          |
| YGL033W                                          | HOP2          | YEL053C                 | MAK10         |
| YEL046C                                          | GLY1          | YPL249C                 | GYP5          |
| YER179W                                          | DMC1          | YGR184C                 | UBR1          |
| YBL025W                                          | RRN10         | YOL081W                 | IRA2          |
| YGL115W                                          | SNF4          | YNL238W                 | KEX2          |
| YIL159W                                          | BNR1          | YMR311C                 | GLC8          |
| YIL159W                                          | BNR1          | YER122C                 | GLO3          |
| YIL159W                                          | BNR1          | YLR370C                 | ARC18         |
| YNL068C                                          | FKH2          | YKR048C                 | NAP1          |
| YIL076W                                          | SEC28         | YBR036C                 | CSG2          |
| YBR274W                                          | CHK1          | YGL151W                 | NUT1          |
| YLR018C                                          | POM34         | YLR131C                 | ACE2          |
| YMR080C                                          | NAM7          | YPL024W                 | RMI1          |
| YPL213W                                          | LEA1          | YBL072C                 | RPS8A         |
| YLR315W                                          | NKP2          | YER122C                 | GLO3          |



| Predictions at threshold level 0.80 continued... |               |                         |               |
|--------------------------------------------------|---------------|-------------------------|---------------|
| Gene1 of predicted pair                          |               | Gene2 of predicted pair |               |
| Systematic Name                                  | Standard Name | Systematic Name         | Standard Name |
| YKL139W                                          | CTK1          | YCL037C                 | SRO9          |
| YNL288W                                          | CAF40         | YGL253W                 | HXK2          |
| YLR234W                                          | TOP3          | YMR116C                 | ASC1          |
| YFR036W                                          | CDC26         | YLR032W                 | RAD5          |
| YDL161W                                          | ENT1          | YGL095C                 | VPS45         |
| YOR033C                                          | EXO1          | YOR080W                 | DIA2          |
| YDR156W                                          | RPA14         | YPL253C                 | VIK1          |
| YOR270C                                          | VPH1          | YLR447C                 | VMA6          |
| YPL161C                                          | BEM4          | YKR030W                 | GMH1          |
| YBR041W                                          | FAT1          | YLR320W                 | MMS22         |
| YPL129W                                          | TAF14         | YDL002C                 | NHP10         |
| YGL147C                                          | RPL9A         | YGR249W                 | MGA1          |
| YBR194W                                          | SOY1          | YJL124C                 | LSM1          |
| YDR363W-A                                        | SEM1          | YPL018W                 | CTF19         |
| YDL020C                                          | RPN4          | YOL051W                 | GAL11         |
| YDL184C                                          | RPL41A        | YJL172W                 | CPS1          |
| YNL199C                                          | GCR2          | YEL013W                 | VAC8          |
| YDR383C                                          | NKP1          | YHR013C                 | ARD1          |
| YPR018W                                          | RLF2          | YNL236W                 | SIN4          |
| YPL022W                                          | RAD1          | YBR215W                 | HPC2          |
| YOR132W                                          | VPS17         | YNL238W                 | KEX2          |
| YIR003W                                          | YIR003W       | YKL204W                 | EAP1          |
| YKL110C                                          | KTI12         | YML112W                 | CTK3          |
| YDR484W                                          | VPS52         | YBR171W                 | SEC66         |
| YNL076W                                          | MKS1          | YNL082W                 | PMS1          |
| YBL102W                                          | SFT2          | YDR320C                 | SWA2          |
| YMR224C                                          | MRE11         | YJL006C                 | CTK2          |
| YDR004W                                          | RAD57         | YPR131C                 | NAT3          |
| YKL048C                                          | ELM1          | YOR043W                 | WHI2          |

| Predictions at threshold level 0.80 continued... |               |                         |               |
|--------------------------------------------------|---------------|-------------------------|---------------|
| Gene1 of predicted pair                          |               | Gene2 of predicted pair |               |
| Systematic Name                                  | Standard Name | Systematic Name         | Standard Name |
| YLR386W                                          | VAC14         | YGR188C                 | BUB1          |
| YBR030W                                          | YBR030W       | YDR484W                 | VPS52         |
| YBR108W                                          | YBR108W       | YPR036W                 | VMA13         |
| YGL087C                                          | MMS2          | YNL307C                 | MCK1          |
| YKL010C                                          | UFD4          | YBR082C                 | UBC4          |
| YPL001W                                          | HAT1          | YEL056W                 | HAT2          |
| YEL043W                                          | YEL043W       | YGL054C                 | ERV14         |
| YKL048C                                          | ELM1          | YJR063W                 | RPA12         |
| YOR156C                                          | NFI1          | YDR440W                 | DOT1          |
| YLR192C                                          | HCR1          | YNL076W                 | MKS1          |
| YPL234C                                          | TFP3          | YDR310C                 | SUM1          |
| YIR005W                                          | IST3          | YLR350W                 | ORM2          |
| YJL004C                                          | SYS1          | YAL002W                 | VPS8          |
| YMR224C                                          | MRE11         | YLR135W                 | SLX4          |
| YLR234W                                          | TOP3          | YLR233C                 | EST1          |
| YKL048C                                          | ELM1          | YMR038C                 | CCS1          |
| YKL160W                                          | ELF1          | YHR108W                 | GGA2          |
| YKL048C                                          | ELM1          | YGR054W                 | YGR054W       |
| YBR108W                                          | YBR108W       | YER162C                 | RAD4          |
| YLR371W                                          | ROM2          | YJR084W                 | CSN12         |
| YJR040W                                          | GEF1          | YER120W                 | SCS2          |
| YOR195W                                          | SLK19         | YNL229C                 | URE2          |
| YDR129C                                          | SAC6          | YML016C                 | PPZ1          |
| YFR031C-A                                        | RPL2A         | YHR012W                 | VPS29         |
| YDR477W                                          | SNF1          | YPL037C                 | EGD1          |
| YKL006W                                          | RPL14A        | YMR116C                 | ASC1          |
| YOR043W                                          | WHI2          | YPL158C                 | YPL158C       |
| YLR337C                                          | VRP1          | YGL237C                 | HAP2          |
| YAL024C                                          | LTE1          | YMR224C                 | MRE11         |

| Predictions at threshold level 0.80 continued... |               |                         |               |
|--------------------------------------------------|---------------|-------------------------|---------------|
| Gene1 of predicted pair                          |               | Gene2 of predicted pair |               |
| Systematic Name                                  | Standard Name | Systematic Name         | Standard Name |
| YLR337C                                          | VRP1          | YLR233C                 | EST1          |
| YML095C                                          | RAD10         | YPR120C                 | CLB5          |
| YGR135W                                          | PRE9          | YDR440W                 | DOT1          |
| YLR422W                                          | YLR422W       | YOR344C                 | TYE7          |
| YJR063W                                          | RPA12         | YLR315W                 | NKP2          |
| YJR063W                                          | RPA12         | YNL225C                 | CNM67         |
| YDL184C                                          | RPL41A        | YML071C                 | COG8          |
| YMR152W                                          | YIM1          | YLR370C                 | ARC18         |
| YER019C-A                                        | SBH2          | YOR085W                 | OST3          |
| YML095C                                          | RAD10         | YNL236W                 | SIN4          |
| YCL037C                                          | SRO9          | YOR109W                 | INP53         |
| YKR072C                                          | SIS2          | YBR228W                 | SLX1          |
| YMR273C                                          | ZDS1          | YKL068W                 | NUP100        |
| YBR030W                                          | YBR030W       | YDL192W                 | ARF1          |
| YBR173C                                          | UMP1          | YLR370C                 | ARC18         |
| YHR178W                                          | STB5          | YOR127W                 | RGA1          |
| YDR156W                                          | RPA14         | YPR046W                 | MCM16         |
| YLR095C                                          | IOC2          | YNL238W                 | KEX2          |
| YDR137W                                          | RGP1          | YBR036C                 | CSG2          |
| YLR320W                                          | MMS22         | YER139C                 | YER139C       |
| YMR092C                                          | AIP1          | YLR429W                 | CRN1          |
| YML016C                                          | PPZ1          | YDR310C                 | SUM1          |
| YDR202C                                          | RAV2          | YGL223C                 | COG1          |
| YNL032W                                          | SIW14         | YGL003C                 | CDH1          |
| YPR017C                                          | DSS4          | YNL238W                 | KEX2          |
| YIL076W                                          | SEC28         | YHL031C                 | GOS1          |
| YNL031C                                          | HHT2          | YBR289W                 | SNF5          |
| YDR490C                                          | PKH1          | YPL004C                 | LSP1          |
| YLR083C                                          | EMP70         | YGR072W                 | UPF3          |

| Predictions at threshold level 0.80 continued... |               |                         |               |
|--------------------------------------------------|---------------|-------------------------|---------------|
| Gene1 of predicted pair                          |               | Gene2 of predicted pair |               |
| Systematic Name                                  | Standard Name | Systematic Name         | Standard Name |
| YGL212W                                          | VAM7          | YCR066W                 | RAD18         |
| YKR035W-A                                        | DID2          | YBR280C                 | SAF1          |
| YPL042C                                          | SSN3          | YIL038C                 | NOT3          |
| YBL102W                                          | SFT2          | YKR030W                 | GMH1          |
| YML001W                                          | YPT7          | YDR207C                 | UME6          |
| YGR081C                                          | SLX9          | YKL068W                 | NUP100        |
| YNL093W                                          | YPT53         | YKR014C                 | YPT52         |
| YMR198W                                          | CIK1          | YGL124C                 | MON1          |
| YBL058W                                          | SHP1          | YKL126W                 | YPK1          |
| YCL037C                                          | SRO9          | YDR310C                 | SUM1          |
| YKL025C                                          | PAN3          | YLR292C                 | SEC72         |
| YDR293C                                          | SSD1          | YHR134W                 | WSS1          |
| YHL031C                                          | GOS1          | YPL161C                 | BEM4          |
| YGR071C                                          | YGR071C       | YJR135C                 | MCM22         |
| YDR469W                                          | SDC1          | YLR357W                 | RSC2          |
| YKL080W                                          | VMA5          | YKL119C                 | VPH2          |
| YDR004W                                          | RAD57         | YGL066W                 | SGF73         |
| YGR261C                                          | APL6          | YJR040W                 | GEF1          |
| YDL223C                                          | HBT1          | YEL060C                 | PRB1          |
| YJL060W                                          | BNA3          | YLR381W                 | CTF3          |
| YIL159W                                          | BNR1          | YMR133W                 | REC114        |
| YJL172W                                          | CPS1          | YER044C                 | ERG28         |
| YBR217W                                          | ATG12         | YDR310C                 | SUM1          |
| YOR096W                                          | RPS7A         | YHR203C                 | RPS4B         |
| YDR484W                                          | VPS52         | YDL077C                 | VAM6          |
| YCL037C                                          | SRO9          | YDL006W                 | PTC1          |
| YLR386W                                          | VAC14         | YDR484W                 | VPS52         |
| YGL087C                                          | MMS2          | YBL047C                 | EDE1          |
| YLR360W                                          | VPS38         | YGR105W                 | VMA21         |

| Predictions at threshold level 0.80 continued... |               |                         |               |
|--------------------------------------------------|---------------|-------------------------|---------------|
| Gene1 of predicted pair                          |               | Gene2 of predicted pair |               |
| Systematic Name                                  | Standard Name | Systematic Name         | Standard Name |
| YDR155C                                          | CPR1          | YJL190C                 | RPS22A        |
| YOL111C                                          | MDY2          | YER122C                 | GLO3          |
| YMR153W                                          | NUP53         | YDL192W                 | ARF1          |
| YNL051W                                          | COG5          | YLR309C                 | IMH1          |
| YEL043W                                          | YEL043W       | YHR012W                 | VPS29         |
| YMR095C                                          | SNO1          | YOR327C                 | SNC2          |
| YLR429W                                          | CRN1          | YDR318W                 | MCM21         |
| YMR125W                                          | STO1          | YGR059W                 | SPR3          |
| YDR146C                                          | SWI5          | YDL002C                 | NHP10         |
| YNL199C                                          | GCR2          | YER161C                 | SPT2          |
| YNL288W                                          | CAF40         | YER068W                 | MOT2          |
| YBR200W                                          | BEM1          | YKL101W                 | HSL1          |
| YGR003W                                          | CUL3          | YJR099W                 | YUH1          |
| YER115C                                          | SPR6          | YER110C                 | KAP123        |
| YEL053C                                          | MAK10         | YPR046W                 | MCM16         |
| YOR106W                                          | VAM3          | YDR456W                 | NHX1          |
| YNR052C                                          | POP2          | YJL006C                 | CTK2          |
| YIL076W                                          | SEC28         | YPR030W                 | CSR2          |
| YPR131C                                          | NAT3          | YGL175C                 | SAE2          |
| YIL034C                                          | CAP2          | YMR109W                 | MYO5          |
| YOR127W                                          | RGA1          | YHR200W                 | RPN10         |
| YNL297C                                          | MON2          | YDL006W                 | PTC1          |
| YEL053C                                          | MAK10         | YGR105W                 | VMA21         |
| YDR171W                                          | HSP42         | YJL006C                 | CTK2          |
| YIL076W                                          | SEC28         | YMR054W                 | STV1          |
| YBL102W                                          | SFT2          | YCL001W                 | RER1          |
| YOR106W                                          | VAM3          | YNL297C                 | MON2          |
| YDR320C                                          | SWA2          | YJL053W                 | PEP8          |
| YBL003C                                          | HTA2          | YLR357W                 | RSC2          |

| Predictions at threshold level 0.80 continued... |               |                         |               |
|--------------------------------------------------|---------------|-------------------------|---------------|
| Gene1 of predicted pair                          |               | Gene2 of predicted pair |               |
| Systematic Name                                  | Standard Name | Systematic Name         | Standard Name |
| YNL289W                                          | PCL1          | YPR119W                 | CLB2          |
| YDR383C                                          | NKP1          | YJR135C                 | MCM22         |
| YHR039C-A                                        | VMA10         | YLR371W                 | ROM2          |
| YKR020W                                          | VPS51         | YLR371W                 | ROM2          |
| YDR144C                                          | MKC7          | YDR155C                 | CPR1          |
| YOR195W                                          | SLK19         | YJR060W                 | CBF1          |
| YMR231W                                          | PEP5          | YMR038C                 | CCS1          |
| YGL175C                                          | SAE2          | YLR032W                 | RAD5          |
| YNL271C                                          | BNI1          | YEL022W                 | GEA2          |
| YOR156C                                          | NFI1          | YKR095W                 | MLP1          |
| YNL199C                                          | GCR2          | YML057W                 | CMP2          |
| YGR184C                                          | UBR1          | YGR188C                 | BUB1          |
| YDR289C                                          | RTT103        | YHL002W                 | HSE1          |
| YML115C                                          | VAN1          | YNL325C                 | FIG4          |
| YPL024W                                          | RMI1          | YMR026C                 | PEX12         |
| YDL083C                                          | RPS16B        | YMR311C                 | GLC8          |
| YKR099W                                          | BAS1          | YEL060C                 | PRB1          |
| YDR389W                                          | SAC7          | YHL031C                 | GOS1          |
| YNL044W                                          | YIP3          | YML012W                 | ERV25         |
| YDL184C                                          | RPL41A        | YJL183W                 | MNN11         |
| YPL161C                                          | BEM4          | YDR264C                 | AKR1          |
| YMR224C                                          | MRE11         | YBR200W                 | BEM1          |
| YPL161C                                          | BEM4          | YMR133W                 | REC114        |
| YOR033C                                          | EXO1          | YMR167W                 | MLH1          |
| YHR156C                                          | LIN1          | YBL103C                 | RTG3          |
| YCR086W                                          | CSM1          | YJR035W                 | RAD26         |
| YOR275C                                          | RIM20         | YGL031C                 | RPL24A        |
| YMR216C                                          | SKY1          | YDL006W                 | PTC1          |
| YLR095C                                          | IOC2          | YDR261C                 | EXG2          |

| Predictions at threshold level 0.80 continued... |               |                         |               |
|--------------------------------------------------|---------------|-------------------------|---------------|
| Gene1 of predicted pair                          |               | Gene2 of predicted pair |               |
| Systematic Name                                  | Standard Name | Systematic Name         | Standard Name |
| YNL069C                                          | RPL16B        | YKR020W                 | VPS51         |
| YIL045W                                          | PIG2          | YAR014C                 | BUD14         |
| YHR060W                                          | VMA22         | YKR030W                 | GMH1          |
| YKL032C                                          | IXR1          | YHR200W                 | RPN10         |
| YKL117W                                          | SBA1          | YPL246C                 | RBD2          |
| YNL307C                                          | MCK1          | YLR320W                 | MMS22         |
| YOR290C                                          | SNF2          | YKR099W                 | BAS1          |
| YJL176C                                          | SWI3          | YGR133W                 | PEX4          |
| YDR254W                                          | CHL4          | YDL155W                 | CLB3          |
| YCR066W                                          | RAD18         | YDR310C                 | SUM1          |
| YIL159W                                          | BNR1          | YLR398C                 | SKI2          |
| YOR140W                                          | SFL1          | YDR456W                 | NHX1          |
| YOR195W                                          | SLK19         | YKL032C                 | IXR1          |
| YEL043W                                          | YEL043W       | YDR153C                 | ENT5          |
| YDR137W                                          | RGP1          | YKL213C                 | DOA1          |
| YFL023W                                          | BUD27         | YHR200W                 | RPN10         |
| YJL036W                                          | SNX4          | YJR033C                 | RAV1          |
| YOR127W                                          | RGA1          | YDR108W                 | GSG1          |
| YMR153W                                          | NUP53         | YEL053C                 | MAK10         |
| YDL116W                                          | NUP84         | YJR090C                 | GRR1          |
| YNL293W                                          | MSB3          | YOR327C                 | SNC2          |
| YFR036W                                          | CDC26         | YJR084W                 | CSN12         |
| YKL048C                                          | ELM1          | YML001W                 | YPT7          |
| YMR224C                                          | MRE11         | YGL124C                 | MON1          |
| YKL007W                                          | CAP1          | YBR200W                 | BEM1          |
| YLR093C                                          | NYV1          | YCR053W                 | THR4          |
| YDL020C                                          | RPN4          | YJL154C                 | VPS35         |
| YBR171W                                          | SEC66         | YDL155W                 | CLB3          |
| YBL103C                                          | RTG3          | YGL025C                 | PGD1          |

| Predictions at threshold level 0.80 continued... |               |                         |               |
|--------------------------------------------------|---------------|-------------------------|---------------|
| Gene1 of predicted pair                          |               | Gene2 of predicted pair |               |
| Systematic Name                                  | Standard Name | Systematic Name         | Standard Name |
| YLR234W                                          | TOP3          | YEL056W                 | HAT2          |
| YPL253C                                          | VIK1          | YGL124C                 | MON1          |
| YOL121C                                          | RPS19A        | YDR207C                 | UME6          |
| YLL007C                                          | YLL007C       | YMR109W                 | MYO5          |
| YMR133W                                          | REC114        | YLR180W                 | SAM1          |
| YMR055C                                          | BUB2          | YGL031C                 | RPL24A        |
| YGL200C                                          | EMP24         | YKR020W                 | VPS51         |
| YOR337W                                          | TEA1          | YLR180W                 | SAM1          |
| YGL115W                                          | SNF4          | YPL120W                 | VPS30         |
| YKR001C                                          | VPS1          | YDR153C                 | ENT5          |
| YLR191W                                          | PEX13         | YAL055W                 | PEX22         |
| YPR029C                                          | APL4          | YDR358W                 | GGA1          |
| YJL176C                                          | SWI3          | YMR116C                 | ASC1          |
| YMR198W                                          | CIK1          | YMR055C                 | BUB2          |
| YLR452C                                          | SST2          | YBR019C                 | GAL10         |
| YML115C                                          | VAN1          | YPL234C                 | TFP3          |
| YBR126C                                          | TPS1          | YLR452C                 | SST2          |
| YBR030W                                          | YBR030W       | YMR153W                 | NUP53         |
| YLL039C                                          | UBI4          | YPL161C                 | BEM4          |
| YPR131C                                          | NAT3          | YKR072C                 | SIS2          |
| YGR261C                                          | APL6          | YMR054W                 | STV1          |
| YNL329C                                          | PEX6          | YJL095W                 | BCK1          |
| YBL051C                                          | PIN4          | YPL018W                 | CTF19         |
| YBR126C                                          | TPS1          | YML100W                 | TSL1          |
| YCL001W                                          | RER1          | YJR060W                 | CBF1          |
| YHL031C                                          | GOS1          | YER120W                 | SCS2          |
| YPL158C                                          | YPL158C       | YLR425W                 | TUS1          |
| YML016C                                          | PPZ1          | YAR014C                 | BUD14         |
| YDR155C                                          | CPR1          | YJL183W                 | MNN11         |



| Predictions at threshold level 0.80 continued... |               |                         |               |
|--------------------------------------------------|---------------|-------------------------|---------------|
| Gene1 of predicted pair                          |               | Gene2 of predicted pair |               |
| Systematic Name                                  | Standard Name | Systematic Name         | Standard Name |
| YIL159W                                          | BNR1          | YPR036W                 | VMA13         |
| YKR020W                                          | VPS51         | YDL226C                 | GCS1          |
| YKL116C                                          | PRR1          | YOL121C                 | RPS19A        |
| YDR383C                                          | NKP1          | YPR046W                 | MCM16         |
| YPR120C                                          | CLB5          | YIR005W                 | IST3          |
| YDR254W                                          | CHL4          | YIL103W                 | DPH1          |
| YJR135C                                          | MCM22         | YOL054W                 | PSH1          |
| YOR069W                                          | VPS5          | YKR001C                 | VPS1          |
| YDL006W                                          | PTC1          | YPR032W                 | SRO7          |
| YOL013C                                          | HRD1          | YLR207W                 | HRD3          |
| YLR192C                                          | HCR1          | YJR056C                 | YJR056C       |
| YFR010W                                          | UBP6          | YJL095W                 | BCK1          |
| YFL013C                                          | IES1          | YDR335W                 | MSN5          |
| YPL024W                                          | RMI1          | YOR270C                 | VPH1          |
| YER116C                                          | SLX8          | YNR072W                 | HXT17         |
| YOR066W                                          | MSA1          | YNL076W                 | MKS1          |
| YMR055C                                          | BUB2          | YAL002W                 | VPS8          |
| YGR100W                                          | MDR1          | YGL198W                 | YIP4          |
| YHL031C                                          | GOS1          | YLR309C                 | IMH1          |
| YNL076W                                          | MKS1          | YMR230W                 | RPS10B        |
| YMR198W                                          | CIK1          | YPL022W                 | RAD1          |
| YDR477W                                          | SNF1          | YOR327C                 | SNC2          |
| YOR270C                                          | VPH1          | YFL004W                 | VTC2          |
| YHR152W                                          | SPO12         | YHR111W                 | UBA4          |
| YBL088C                                          | TEL1          | YPR120C                 | CLB5          |
| YPL161C                                          | BEM4          | YOR141C                 | ARP8          |
| YMR133W                                          | REC114        | YOR066W                 | MSA1          |
| YBL051C                                          | PIN4          | YKR020W                 | VPS51         |
| YIL148W                                          | RPL40A        | YER115C                 | SPR6          |

| Predictions at threshold level 0.80 continued... |               |                         |               |
|--------------------------------------------------|---------------|-------------------------|---------------|
| Gene1 of predicted pair                          |               | Gene2 of predicted pair |               |
| Systematic Name                                  | Standard Name | Systematic Name         | Standard Name |
| YAL024C                                          | LTE1          | YIL053W                 | RHR2          |
| YDR484W                                          | VPS52         | YNL307C                 | MCK1          |
| YLR381W                                          | CTF3          | YFR036W                 | CDC26         |
| YDL020C                                          | RPN4          | YEL027W                 | CUP5          |
| YFL023W                                          | BUD27         | YLR452C                 | SST2          |
| YDR358W                                          | GGA1          | YPL195W                 | APL5          |
| YNL325C                                          | FIG4          | YER162C                 | RAD4          |
| YBR084C-A                                        | RPL19A        | YGL246C                 | RAI1          |
| YOR127W                                          | RGA1          | YNL127W                 | FAR11         |
| YJR060W                                          | CBF1          | YPL120W                 | VPS30         |
| YGL200C                                          | EMP24         | YDL155W                 | CLB3          |
| YMR116C                                          | ASC1          | YGR217W                 | CCH1          |
| YLR399C                                          | BDF1          | YJR135C                 | MCM22         |
| YAL024C                                          | LTE1          | YOR290C                 | SNF2          |
| YOR109W                                          | INP53         | YNR032W                 | PPG1          |
| YFR008W                                          | FAR7          | YDR200C                 | VPS64         |
| YDR456W                                          | NHX1          | YER096W                 | SHC1          |
| YPR030W                                          | CSR2          | YML071C                 | COG8          |
| YPR036W                                          | VMA13         | YJR084W                 | CSN12         |
| YHL002W                                          | HSE1          | YDR310C                 | SUM1          |
| YML038C                                          | YMD8          | YNL238W                 | KEX2          |
| YLR234W                                          | TOP3          | YOR001W                 | RRP6          |
| YGL163C                                          | RAD54         | YKL068W                 | NUP100        |
| YOR001W                                          | RRP6          | YAL002W                 | VPS8          |
| YBR289W                                          | SNF5          | YJL140W                 | RPB4          |
| YHR156C                                          | LIN1          | YLR094C                 | GIS3          |
| YDR439W                                          | LRS4          | YGR270W                 | YTA7          |
| YNL215W                                          | IES2          | YBR278W                 | DPB3          |
| YHR152W                                          | SPO12         | YKL048C                 | ELM1          |

| Predictions at threshold level 0.80 continued... |               |                         |               |
|--------------------------------------------------|---------------|-------------------------|---------------|
| Gene1 of predicted pair                          |               | Gene2 of predicted pair |               |
| Systematic Name                                  | Standard Name | Systematic Name         | Standard Name |
| YNR032W                                          | PPG1          | YPR032W                 | SRO7          |
| YJL053W                                          | PEP8          | YOR109W                 | INP53         |
| YEL043W                                          | YEL043W       | YAL002W                 | VPS8          |
| YOR337W                                          | TEA1          | YDL184C                 | RPL41A        |
| YCL073C                                          | YCL073C       | YPL240C                 | HSP82         |
| YLR061W                                          | RPL22A        | YOR035C                 | SHE4          |
| YHL031C                                          | GOS1          | YOR308C                 | SNU66         |
| YHR073W                                          | OSH3          | YML057W                 | CMP2          |
| YOR270C                                          | VPH1          | YMR230W                 | RPS10B        |
| YLR396C                                          | VPS33         | YLR093C                 | NYV1          |
| YER044C                                          | ERG28         | YJR084W                 | CSN12         |
| YGL215W                                          | CLG1          | YDR385W                 | EFT2          |
| YLR381W                                          | CTF3          | YLR150W                 | STM1          |
| YLR337C                                          | VRP1          | YLL039C                 | UBI4          |
| YKL048C                                          | ELM1          | YBR082C                 | UBC4          |
| YBL058W                                          | SHP1          | YER139C                 | YER139C       |
| YOR033C                                          | EXO1          | YOR368W                 | RAD17         |
| YNL044W                                          | YIP3          | YML071C                 | COG8          |
| YIL008W                                          | URM1          | YKR048C                 | NAP1          |
| YDR477W                                          | SNF1          | YOL145C                 | CTR9          |
| YNL248C                                          | RPA49         | YDR318W                 | MCM21         |
| YGL124C                                          | MON1          | YLR370C                 | ARC18         |
| YLR234W                                          | TOP3          | YNL307C                 | MCK1          |
| YNL215W                                          | IES2          | YNL054W                 | VAC7          |
| YBR194W                                          | SOY1          | YDR378C                 | LSM6          |
| YNL016W                                          | PUB1          | YML028W                 | TSA1          |
| YBR200W                                          | BEM1          | YPR036W                 | VMA13         |
| YNL218W                                          | MGS1          | YML028W                 | TSA1          |
| YHR081W                                          | LRP1          | YDR358W                 | GGA1          |

| Predictions at threshold level 0.80 continued... |               |                         |               |
|--------------------------------------------------|---------------|-------------------------|---------------|
| Gene1 of predicted pair                          |               | Gene2 of predicted pair |               |
| Systematic Name                                  | Standard Name | Systematic Name         | Standard Name |
| YBL051C                                          | PIN4          | YOR327C                 | SNC2          |
| YLR337C                                          | VRP1          | YJL006C                 | CTK2          |
| YMR153W                                          | NUP53         | YJL172W                 | CPS1          |
| YLR386W                                          | VAC14         | YNL229C                 | URE2          |
| YDR335W                                          | MSN5          | YPL018W                 | CTF19         |
| YPL106C                                          | SSE1          | YDL226C                 | GCS1          |
| YJL151C                                          | SNA3          | YMR253C                 | YMR253C       |
| YFL033C                                          | RIM15         | YAR014C                 | BUD14         |
| YGL078C                                          | DBP3          | YBL103C                 | RTG3          |
| YDR378C                                          | LSM6          | YJR063W                 | RPA12         |
| YMR284W                                          | YKU70         | YMR038C                 | CCS1          |
| YMR224C                                          | MRE11         | YKL068W                 | NUP100        |
| YPL253C                                          | VIK1          | YOR141C                 | ARP8          |
| YDR245W                                          | MNN10         | YGL174W                 | BUD13         |
| YGL212W                                          | VAM7          | YBL072C                 | RPS8A         |
| YLR360W                                          | VPS38         | YEL043W                 | YEL043W       |
| YPL042C                                          | SSN3          | YOR001W                 | RRP6          |
| YBL051C                                          | PIN4          | YCR086W                 | CSM1          |
| YDR318W                                          | MCM21         | YOR141C                 | ARP8          |
| YPL024W                                          | RMI1          | YLR288C                 | MEC3          |
| YIL159W                                          | BNR1          | YOR290C                 | SNF2          |
| YPL115C                                          | BEM3          | YKL048C                 | ELM1          |
| YML115C                                          | VAN1          | YBL072C                 | RPS8A         |
| YLR447C                                          | VMA6          | YNL107W                 | YAF9          |
| YDL101C                                          | DUN1          | YJR035W                 | RAD26         |
| YBR200W                                          | BEM1          | YOR014W                 | RTS1          |
| YHR171W                                          | ATG7          | YOR106W                 | VAM3          |
| YML095C                                          | RAD10         | YPL256C                 | CLN2          |
| YDR477W                                          | SNF1          | YOR290C                 | SNF2          |

| Predictions at threshold level 0.80 continued... |               |                         |               |
|--------------------------------------------------|---------------|-------------------------|---------------|
| Gene1 of predicted pair                          |               | Gene2 of predicted pair |               |
| Systematic Name                                  | Standard Name | Systematic Name         | Standard Name |
| YDL184C                                          | RPL41A        | YDR261C                 | EXG2          |
| YDR129C                                          | SAC6          | YGL153W                 | PEX14         |
| YOR001W                                          | RRP6          | YLR315W                 | NKP2          |
| YDR320C                                          | SWA2          | YJL036W                 | SNX4          |
| YGL033W                                          | HOP2          | YJR032W                 | CPR7          |
| YDL020C                                          | RPN4          | YBR114W                 | RAD16         |
| YLR292C                                          | SEC72         | YOL067C                 | RTG1          |
| YNL297C                                          | MON2          | YOR327C                 | SNC2          |
| YMR116C                                          | ASC1          | YOR035C                 | SHE4          |
| YGL087C                                          | MMS2          | YML016C                 | PPZ1          |
| YBL008W                                          | HIR1          | YJL138C                 | TIF2          |
| YLR360W                                          | VPS38         | YOR014W                 | RTS1          |
| YDR076W                                          | RAD55         | YOR368W                 | RAD17         |
| YPL024W                                          | RMI1          | YOR032C                 | HMS1          |
| YHR010W                                          | RPL27A        | YDR207C                 | UME6          |
| YDL020C                                          | RPN4          | YFR010W                 | UBP6          |
| YOR109W                                          | INP53         | YKR020W                 | VPS51         |
| YJL154C                                          | VPS35         | YOR132W                 | VPS17         |
| YMR039C                                          | SUB1          | YOR038C                 | HIR2          |
| YML115C                                          | VAN1          | YER122C                 | GLO3          |
| YBR274W                                          | CHK1          | YKL101W                 | HSL1          |
| YPL213W                                          | LEA1          | YOL081W                 | IRA2          |
| YNL243W                                          | SLA2          | YLR039C                 | RIC1          |
| YEL053C                                          | MAK10         | YDL155W                 | CLB3          |
| YLR090W                                          | XDJ1          | YLR452C                 | SST2          |
| YJL204C                                          | RCY1          | YDR139C                 | RUB1          |
| YMR224C                                          | MRE11         | YDL059C                 | RAD59         |
| YLR095C                                          | IOC2          | YGL078C                 | DBP3          |
| YJL136C                                          | RPS21B        | YHR115C                 | DMA1          |

| Predictions at threshold level 0.80 continued... |               |                         |               |
|--------------------------------------------------|---------------|-------------------------|---------------|
| Gene1 of predicted pair                          |               | Gene2 of predicted pair |               |
| Systematic Name                                  | Standard Name | Systematic Name         | Standard Name |
| YHL031C                                          | GOS1          | YDR207C                 | UME6          |
| YPL018W                                          | CTF19         | YGL124C                 | MON1          |
| YNL032W                                          | SIW14         | YLR452C                 | SST2          |
| YML115C                                          | VAN1          | YDR146C                 | SWI5          |
| YOL030W                                          | GAS5          | YDL013W                 | SLX5          |
| YOL111C                                          | MDY2          | YDR310C                 | SUM1          |
| YLR006C                                          | SSK1          | YBR171W                 | SEC66         |
| YEL060C                                          | PRB1          | YER040W                 | GLN3          |
| YNL127W                                          | FAR11         | YDR207C                 | UME6          |
| YDR383C                                          | NKP1          | YPR120C                 | CLB5          |
| YBR228W                                          | SLX1          | YMR038C                 | CCS1          |
| YDL116W                                          | NUP84         | YPL125W                 | KAP120        |
| YPL253C                                          | VIK1          | YDR144C                 | MKC7          |
| YBL021C                                          | HAP3          | YIL008W                 | URM1          |
| YBR274W                                          | CHK1          | YDL002C                 | NHP10         |
| YPR036W                                          | VMA13         | YKR035W-A               | DID2          |
| YLR119W                                          | SRN2          | YBL103C                 | RTG3          |
| YIL076W                                          | SEC28         | YML001W                 | YPT7          |
| YPL042C                                          | SSN3          | YPL253C                 | VIK1          |
| YGR249W                                          | MGA1          | YFL023W                 | BUD27         |
| YJR060W                                          | CBF1          | YDR310C                 | SUM1          |
| YLR386W                                          | VAC14         | YDR379W                 | RGA2          |
| YKR020W                                          | VPS51         | YOR035C                 | SHE4          |
| YBL008W                                          | HIR1          | YGL250W                 | RMR1          |
| YIL008W                                          | URM1          | YJL183W                 | MNN11         |
| YPL042C                                          | SSN3          | YGR108W                 | CLB1          |
| YAL024C                                          | LTE1          | YBR215W                 | HPC2          |
| YEL053C                                          | MAK10         | YER162C                 | RAD4          |
| YDL078C                                          | MDH3          | YPR119W                 | CLB2          |

| Predictions at threshold level 0.80 continued... |               |                         |               |
|--------------------------------------------------|---------------|-------------------------|---------------|
| Gene1 of predicted pair                          |               | Gene2 of predicted pair |               |
| Systematic Name                                  | Standard Name | Systematic Name         | Standard Name |
| YNL236W                                          | SIN4          | YJL140W                 | RPB4          |
| YIL076W                                          | SEC28         | YLR371W                 | ROM2          |
| YDR108W                                          | GSG1          | YPL105C                 | YPL105C       |
| YPL253C                                          | VIK1          | YDR254W                 | CHL4          |
| YJL190C                                          | RPS22A        | YDR310C                 | SUM1          |
| YBR200W                                          | BEM1          | YPL106C                 | SSE1          |
| YJL172W                                          | CPS1          | YDR310C                 | SUM1          |
| YGL115W                                          | SNF4          | YJL095W                 | BCK1          |
| YBR030W                                          | YBR030W       | YPR036W                 | VMA13         |
| YPR051W                                          | MAK3          | YKR001C                 | VPS1          |
| YGL078C                                          | DBP3          | YNL058C                 | YNL058C       |
| YOR312C                                          | RPL20B        | YLR370C                 | ARC18         |
| YNL199C                                          | GCR2          | YPR119W                 | CLB2          |
| YLR381W                                          | CTF3          | YLR452C                 | SST2          |
| YBR173C                                          | UMP1          | YER122C                 | GLO3          |
| YML115C                                          | VAN1          | YGR105W                 | VMA21         |
| YMR224C                                          | MRE11         | YLR180W                 | SAM1          |
| YBR195C                                          | MSI1          | YDR289C                 | RTT103        |
| YBL008W                                          | HIR1          | YBR010W                 | HHT1          |
| YLR119W                                          | SRN2          | YLR093C                 | NYV1          |
| YER096W                                          | SHC1          | YLR371W                 | ROM2          |
| YIR025W                                          | MND2          | YLR102C                 | APC9          |
| YMR319C                                          | FET4          | YKR093W                 | PTR2          |
| YGR020C                                          | VMA7          | YDL006W                 | PTC1          |
| YPL042C                                          | SSN3          | YDR440W                 | DOT1          |
| YDR378C                                          | LSM6          | YJL006C                 | CTK2          |
| YMR153W                                          | NUP53         | YJL095W                 | BCK1          |
| YOR080W                                          | DIA2          | YLR381W                 | CTF3          |
| YJL036W                                          | SNX4          | YDR202C                 | RAV2          |

| Predictions at threshold level 0.80 continued... |               |                         |               |
|--------------------------------------------------|---------------|-------------------------|---------------|
| Gene1 of predicted pair                          |               | Gene2 of predicted pair |               |
| Systematic Name                                  | Standard Name | Systematic Name         | Standard Name |
| YNR072W                                          | HXT17         | YLR093C                 | NYV1          |
| YER162C                                          | RAD4          | YJR084W                 | CSN12         |
| YDR156W                                          | RPA14         | YDR254W                 | CHL4          |
| YKL025C                                          | PAN3          | YJR135C                 | MCM22         |
| YMR054W                                          | STV1          | YPR032W                 | SRO7          |
| YMR179W                                          | SPT21         | YDR207C                 | UME6          |
| YPL152W                                          | RRD2          | YFR036W                 | CDC26         |
| YPR131C                                          | NAT3          | YLR352W                 | YLR352W       |
| YCL001W                                          | RER1          | YPL227C                 | ALG5          |
| YDR225W                                          | HTA1          | YKR048C                 | NAP1          |
| YKL010C                                          | UFD4          | YDR363W-A               | SEM1          |
| YOL111C                                          | MDY2          | YLR093C                 | NYV1          |
| YLR288C                                          | MEC3          | YBR278W                 | DPB3          |
| YLR337C                                          | VRP1          | YEL053C                 | MAK10         |
| YBR200W                                          | BEM1          | YGR105W                 | VMA21         |
| YBL058W                                          | SHP1          | YDR358W                 | GGA1          |
| YDR383C                                          | NKP1          | YLR079W                 | SIC1          |
| YPR017C                                          | DSS4          | YJR040W                 | GEF1          |
| YLR360W                                          | VPS38         | YDR310C                 | SUM1          |
| YNL076W                                          | MKS1          | YMR214W                 | SCJ1          |
| YGL151W                                          | NUT1          | YNL107W                 | YAF9          |
| YGL212W                                          | VAM7          | YEL053C                 | MAK10         |
| YGL025C                                          | PGD1          | YNL041C                 | COG6          |
| YPL042C                                          | SSN3          | YDR155C                 | CPR1          |
| YOR080W                                          | DIA2          | YPL106C                 | SSE1          |
| YNL333W                                          | SNZ2          | YAR014C                 | BUD14         |
| YMR224C                                          | MRE11         | YDR363W-A               | SEM1          |
| YOR195W                                          | SLK19         | YAR014C                 | BUD14         |
| YFR010W                                          | UBP6          | YPR046W                 | MCM16         |



| Predictions at threshold level 0.80 continued... |               |                         |               |
|--------------------------------------------------|---------------|-------------------------|---------------|
| Gene1 of predicted pair                          |               | Gene2 of predicted pair |               |
| Systematic Name                                  | Standard Name | Systematic Name         | Standard Name |
| YBR274W                                          | CHK1          | YDR310C                 | SUM1          |
| YBR041W                                          | FAT1          | YJL095W                 | BCK1          |
| YKL139W                                          | CTK1          | YIL036W                 | CST6          |
| YHR013C                                          | ARD1          | YML112W                 | CTK3          |
| YKL010C                                          | UFD4          | YKR020W                 | VPS51         |
| YGL087C                                          | MMS2          | YLR234W                 | TOP3          |
| YLR309C                                          | IMH1          | YNL107W                 | YAF9          |
| YKR099W                                          | BAS1          | YOL111C                 | MDY2          |
| YOL018C                                          | TLG2          | YKR030W                 | GMH1          |
| YGR020C                                          | VMA7          | YEL027W                 | CUP5          |
| YMR199W                                          | CLN1          | YKL068W                 | NUP100        |
| YDL116W                                          | NUP84         | YAR014C                 | BUD14         |
| YKL214C                                          | YRA2          | YNL139C                 | RLR1          |
| YFR010W                                          | UBP6          | YKL160W                 | ELF1          |
| YPL024W                                          | RMI1          | YPL079W                 | RPL21B        |
| YJL136C                                          | RPS21B        | YBL087C                 | RPL23A        |
| YOR332W                                          | VMA4          | YOR270C                 | VPH1          |
| YIL159W                                          | BNR1          | YPL137C                 | GIP3          |
| YMR116C                                          | ASC1          | YOR275C                 | RIM20         |
| YNL238W                                          | KEX2          | YER139C                 | YER139C       |
| YKR020W                                          | VPS51         | YNL116W                 | DMA2          |
| YDR383C                                          | NKP1          | YGL252C                 | RTG2          |
| YDL185W                                          | TFP1          | YNL147W                 | LSM7          |
| YER087C-B                                        | SBH1          | YLR226W                 | BUR2          |
| YHR013C                                          | ARD1          | YOR312C                 | RPL20B        |
| YNL201C                                          | PSY2          | YDR183W                 | PLP1          |
| YLR360W                                          | VPS38         | YMR216C                 | SKY1          |
| YGL212W                                          | VAM7          | YPL137C                 | GIP3          |
| YLR090W                                          | XDJ1          | YKL139W                 | CTK1          |

| Predictions at threshold level 0.80 continued... |               |                         |               |
|--------------------------------------------------|---------------|-------------------------|---------------|
| Gene1 of predicted pair                          |               | Gene2 of predicted pair |               |
| Systematic Name                                  | Standard Name | Systematic Name         | Standard Name |
| YOR358W                                          | HAP5          | YDR155C                 | CPR1          |
| YBR171W                                          | SEC66         | YOL067C                 | RTG1          |
| YMR026C                                          | PEX12         | YLR180W                 | SAM1          |
| YAL024C                                          | LTE1          | YNL069C                 | RPL16B        |
| YJL095W                                          | BCK1          | YDL192W                 | ARF1          |
| YPL161C                                          | BEM4          | YNL107W                 | YAF9          |
| YOR132W                                          | VPS17         | YPL259C                 | APM1          |
| YGL180W                                          | ATG1          | YLR423C                 | ATG17         |
| YLR422W                                          | YLR422W       | YOL108C                 | INO4          |
| YBR173C                                          | UMP1          | YNL058C                 | YNL058C       |
| YJR063W                                          | RPA12         | YPL018W                 | CTF19         |
| YOR076C                                          | SKI7          | YPL079W                 | RPL21B        |
| YOR069W                                          | VPS5          | YNR032W                 | PPG1          |
| YDR318W                                          | MCM21         | YHL002W                 | HSE1          |
| YPL057C                                          | SUR1          | YBR171W                 | SEC66         |
| YDR129C                                          | SAC6          | YPL234C                 | TFP3          |
| YGL087C                                          | MMS2          | YML095C                 | RAD10         |
| YBR173C                                          | UMP1          | YLR093C                 | NYV1          |
| YCR063W                                          | BUD31         | YBR188C                 | NTC20         |
| YER116C                                          | SLX8          | YML028W                 | TSA1          |
| YER139C                                          | YER139C       | YAL002W                 | VPS8          |
| YMR284W                                          | YKU70         | YJL187C                 | SWE1          |
| YIL034C                                          | CAP2          | YHR134W                 | WSS1          |
| YFR010W                                          | UBP6          | YER044C                 | ERG28         |
| YMR054W                                          | STV1          | YDL077C                 | VAM6          |
| YJL060W                                          | BNA3          | YBR107C                 | IML3          |
| YER116C                                          | SLX8          | YGR188C                 | BUB1          |
| YGL033W                                          | HOP2          | YLR094C                 | GIS3          |
| YHR156C                                          | LIN1          | YMR142C                 | RPL13B        |

| Predictions at threshold level 0.80 continued... |               |                         |               |
|--------------------------------------------------|---------------|-------------------------|---------------|
| Gene1 of predicted pair                          |               | Gene2 of predicted pair |               |
| Systematic Name                                  | Standard Name | Systematic Name         | Standard Name |
| YLR337C                                          | VRP1          | YJL183W                 | MNN11         |
| YGR104C                                          | SRB5          | YCR084C                 | TUP1          |
| YIL034C                                          | CAP2          | YOR208W                 | PTP2          |
| YOR038C                                          | HIR2          | YDR073W                 | SNF11         |
| YNL291C                                          | MID1          | YML001W                 | YPT7          |
| YLR090W                                          | XDJ1          | YER162C                 | RAD4          |
| YGR108W                                          | CLB1          | YJR090C                 | GRR1          |
| YBL058W                                          | SHP1          | YNL041C                 | COG6          |
| YLR337C                                          | VRP1          | YOL081W                 | IRA2          |
| YGL212W                                          | VAM7          | YBR036C                 | CSG2          |
| YML115C                                          | VAN1          | YNL199C                 | GCR2          |
| YDR507C                                          | GIN4          | YOR275C                 | RIM20         |
| YEL013W                                          | VAC8          | YOR124C                 | UBP2          |
| YGR072W                                          | UPF3          | YLR309C                 | IMH1          |
| YMR109W                                          | MYO5          | YOL067C                 | RTG1          |
| YKL079W                                          | SMY1          | YEL022W                 | GEA2          |
| YOL126C                                          | MDH2          | YKR024C                 | DBP7          |
| YDR363W-A                                        | SEM1          | YLR398C                 | SKI2          |
| YBR200W                                          | BEM1          | YLR398C                 | SKI2          |
| YBL102W                                          | SFT2          | YDL077C                 | VAM6          |
| YIL053W                                          | RHR2          | YNL058C                 | YNL058C       |
| YCR086W                                          | CSM1          | YJL183W                 | MNN11         |
| YKL048C                                          | ELM1          | YKR020W                 | VPS51         |
| YHR111W                                          | UBA4          | YGL163C                 | RAD54         |
| YLR362W                                          | STE11         | YER118C                 | SHO1          |
| YGL153W                                          | PEX14         | YAL055W                 | PEX22         |
| YGR054W                                          | YGR054W       | YAL002W                 | VPS8          |
| YMR095C                                          | SNO1          | YPL057C                 | SUR1          |
| YBR084C-A                                        | RPL19A        | YOR275C                 | RIM20         |

| Predictions at threshold level 0.80 continued... |               |                         |               |
|--------------------------------------------------|---------------|-------------------------|---------------|
| Gene1 of predicted pair                          |               | Gene2 of predicted pair |               |
| Systematic Name                                  | Standard Name | Systematic Name         | Standard Name |
| YDL083C                                          | RPS16B        | YOL121C                 | RPS19A        |
| YLR090W                                          | XDJ1          | YHR200W                 | RPN10         |
| YDR137W                                          | RGP1          | YDR363W-A               | SEM1          |
| YGL066W                                          | SGF73         | YLR381W                 | CTF3          |
| YLR360W                                          | VPS38         | YBR082C                 | UBC4          |
| YPR084W                                          | YPR084W       | YGL054C                 | ERV14         |
| YJR060W                                          | CBF1          | YPL195W                 | APL5          |
| YJR024C                                          | MDE1          | YIL156W                 | UBP7          |
| YGL063W                                          | PUS2          | YPL240C                 | HSP82         |
| YDR335W                                          | MSN5          | YDL047W                 | SIT4          |
| YOR069W                                          | VPS5          | YCL001W                 | RER1          |
| YGL212W                                          | VAM7          | YER122C                 | GLO3          |
| YCR034W                                          | FEN1          | YLR234W                 | TOP3          |
| YMR153W                                          | NUP53         | YPR030W                 | CSR2          |
| YOR140W                                          | SFL1          | YPL253C                 | VIK1          |
| YMR016C                                          | SOK2          | YHR200W                 | RPN10         |
| YDR293C                                          | SSD1          | YPL253C                 | VIK1          |
| YOR033C                                          | EXO1          | YNL307C                 | MCK1          |
| YDR443C                                          | SSN2          | YOR035C                 | SHE4          |
| YLR234W                                          | TOP3          | YPL256C                 | CLN2          |
| YMR224C                                          | MRE11         | YGL025C                 | PGD1          |
| YOR337W                                          | TEA1          | YLR452C                 | SST2          |
| YFR010W                                          | UBP6          | YGR249W                 | MGA1          |
| YOR043W                                          | WHI2          | YPL137C                 | GIP3          |
| YNL215W                                          | IES2          | YNL248C                 | RPA49         |
| YDR137W                                          | RGP1          | YLR350W                 | ORM2          |
| YGR105W                                          | VMA21         | YAR014C                 | BUD14         |
| YCL014W                                          | BUD3          | YLR219W                 | MSC3          |
| YML001W                                          | YPT7          | YGL124C                 | MON1          |

| Predictions at threshold level 0.80 continued... |               |                         |               |
|--------------------------------------------------|---------------|-------------------------|---------------|
| Gene1 of predicted pair                          |               | Gene2 of predicted pair |               |
| Systematic Name                                  | Standard Name | Systematic Name         | Standard Name |
| YNL206C                                          | RTT106        | YDR207C                 | UME6          |
| YCR086W                                          | CSM1          | YML112W                 | CTK3          |
| YIR005W                                          | IST3          | YOL054W                 | PSH1          |
| YNL058C                                          | YNL058C       | YBR280C                 | SAF1          |
| YNL307C                                          | MCK1          | YHR115C                 | DMA1          |
| YLR191W                                          | PEX13         | YGR077C                 | PEX8          |
| YDR260C                                          | SWM1          | YFR036W                 | CDC26         |
| YKL010C                                          | UFD4          | YLR337C                 | VRP1          |
| YLR337C                                          | VRP1          | YDR207C                 | UME6          |
| YFL023W                                          | BUD27         | YJL183W                 | MNN11         |
| YIL033C                                          | BCY1          | YBL106C                 | SRO77         |
| YGL087C                                          | MMS2          | YHR114W                 | BZZ1          |
| YPL024W                                          | RMI1          | YOR327C                 | SNC2          |
| YNL206C                                          | RTT106        | YPR036W                 | VMA13         |
| YLR079W                                          | SIC1          | YNL225C                 | CNM67         |
| YIL053W                                          | RHR2          | YNL076W                 | MKS1          |
| YML115C                                          | VAN1          | YOR106W                 | VAM3          |
| YOR066W                                          | MSA1          | YOR035C                 | SHE4          |
| YPR040W                                          | TIP41         | YNL116W                 | DMA2          |
| YOR367W                                          | SCP1          | YDL226C                 | GCS1          |
| YOR358W                                          | HAP5          | YGR270W                 | YTA7          |
| YLR234W                                          | TOP3          | YLR410W                 | VIP1          |
| YER144C                                          | UBP5          | YER122C                 | GLO3          |
| YLR234W                                          | TOP3          | YBL051C                 | PIN4          |
| YDR004W                                          | RAD57         | YBR073W                 | RDH54         |
| YBR217W                                          | ATG12         | YMR311C                 | GLC8          |
| YLR360W                                          | VPS38         | YPR032W                 | SRO7          |
| YIL159W                                          | BNR1          | YKL116C                 | PRR1          |
| YJL172W                                          | CPS1          | YLR398C                 | SKI2          |

| Predictions at threshold level 0.80 continued... |               |                         |               |
|--------------------------------------------------|---------------|-------------------------|---------------|
| Gene1 of predicted pair                          |               | Gene2 of predicted pair |               |
| Systematic Name                                  | Standard Name | Systematic Name         | Standard Name |
| YEL053C                                          | MAK10         | YPR032W                 | SRO7          |
| YKR020W                                          | VPS51         | YNL041C                 | COG6          |
| YBR171W                                          | SEC66         | YGR152C                 | RSR1          |
| YKL007W                                          | CAP1          | YNL135C                 | FPR1          |
| YMR016C                                          | SOK2          | YER044C                 | ERG28         |
| YMR172W                                          | HOT1          | YGL151W                 | NUT1          |
| YER110C                                          | KAP123        | YEL053C                 | MAK10         |
| YNL236W                                          | SIN4          | YOL091W                 | SPO21         |
| YLR371W                                          | ROM2          | YNL090W                 | RHO2          |
| YJR059W                                          | PTK2          | YBL079W                 | NUP170        |
| YDL116W                                          | NUP84         | YBL008W                 | HIR1          |
| YML071C                                          | COG8          | YBR280C                 | SAF1          |
| YDR155C                                          | CPR1          | YBR114W                 | RAD16         |
| YER139C                                          | YER139C       | YJL183W                 | MNN11         |
| YHR200W                                          | RPN10         | YOL054W                 | PSH1          |
| YMR016C                                          | SOK2          | YFL023W                 | BUD27         |
| YGL223C                                          | COG1          | YPL195W                 | APL5          |
| YKL025C                                          | PAN3          | YDR293C                 | SSD1          |
| YGL078C                                          | DBP3          | YPR036W                 | VMA13         |
| YOR132W                                          | VPS17         | YDR183W                 | PLP1          |
| YMR199W                                          | CLN1          | YOR140W                 | SFL1          |
| YHR079C                                          | IRE1          | YER089C                 | PTC2          |
| YDR363W-A                                        | SEM1          | YPL248C                 | GAL4          |
| YKL126W                                          | YPK1          | YOR035C                 | SHE4          |
| YAL024C                                          | LTE1          | YOR337W                 | TEA1          |
| YDR080W                                          | VPS41         | YDR207C                 | UME6          |
| YKL116C                                          | PRR1          | YDR261C                 | EXG2          |
| YGL147C                                          | RPL9A         | YNR072W                 | HXT17         |
| YPR089W                                          | YPR089W       | YDL155W                 | CLB3          |

| Predictions at threshold level 0.80 continued... |               |                         |               |
|--------------------------------------------------|---------------|-------------------------|---------------|
| Gene1 of predicted pair                          |               | Gene2 of predicted pair |               |
| Systematic Name                                  | Standard Name | Systematic Name         | Standard Name |
| YER116C                                          | SLX8          | YER144C                 | UBP5          |
| YNL051W                                          | COG5          | YJR033C                 | RAV1          |
| YCR053W                                          | THR4          | YOR036W                 | PEP12         |
| YDL083C                                          | RPS16B        | YMR230W                 | RPS10B        |
| YDR225W                                          | HTA1          | YBR057C                 | MUM2          |
| YMR153W                                          | NUP53         | YMR311C                 | GLC8          |
| YDL184C                                          | RPL41A        | YBL025W                 | RRN10         |
| YMR224C                                          | MRE11         | YDR378C                 | LSM6          |
| YIL008W                                          | URM1          | YDR310C                 | SUM1          |
| YBR107C                                          | IML3          | YDR076W                 | RAD55         |
| YGR270W                                          | YTA7          | YOL081W                 | IRA2          |
| YLR144C                                          | ACF2          | YHR016C                 | YSC84         |
| YEL050C                                          | RML2          | YLR410W                 | VIP1          |
| YKR093W                                          | PTR2          | YFL044C                 | OTU1          |
| YGL054C                                          | ERV14         | YNL127W                 | FAR11         |
| YPR171W                                          | BSP1          | YNL094W                 | APP1          |
| YHR150W                                          | PEX28         | YLR324W                 | PEX30         |
| YPL042C                                          | SSN3          | YOR195W                 | SLK19         |
| YOR112W                                          | CEX1          | YDL077C                 | VAM6          |
| YDR004W                                          | RAD57         | YDR076W                 | RAD55         |
| YPL042C                                          | SSN3          | YHR167W                 | THP2          |
| YDR156W                                          | RPA14         | YKR061W                 | KTR2          |
| YER115C                                          | SPR6          | YPL256C                 | CLN2          |
| YAL020C                                          | ATS1          | YOR327C                 | SNC2          |
| YDR378C                                          | LSM6          | YPL161C                 | BEM4          |
| YMR224C                                          | MRE11         | YPL152W                 | RRD2          |
| YER087C-B                                        | SBH1          | YGL198W                 | YIP4          |
| YLR061W                                          | RPL22A        | YAL002W                 | VPS8          |
| YKL025C                                          | PAN3          | YHR012W                 | VPS29         |

| Predictions at threshold level 0.80 continued... |               |                         |               |
|--------------------------------------------------|---------------|-------------------------|---------------|
| Gene1 of predicted pair                          |               | Gene2 of predicted pair |               |
| Systematic Name                                  | Standard Name | Systematic Name         | Standard Name |
| YMR142C                                          | RPL13B        | YNL307C                 | MCK1          |
| YEL056W                                          | HAT2          | YLR233C                 | EST1          |
| YOR275C                                          | RIM20         | YKL101W                 | HSL1          |
| YOL051W                                          | GAL11         | YPR072W                 | NOT5          |
| YPL050C                                          | MNN9          | YBL072C                 | RPS8A         |
| YIL053W                                          | RHR2          | YCR053W                 | THR4          |
| YER116C                                          | SLX8          | YDR137W                 | RGP1          |
| YKL117W                                          | SBA1          | YOR358W                 | HAP5          |
| YDR129C                                          | SAC6          | YMR109W                 | MYO5          |
| YOL126C                                          | MDH2          | YPL246C                 | RBD2          |
| YJR140C                                          | HIR3          | YHR077C                 | NMD2          |
| YOR043W                                          | WHI2          | YPL195W                 | APL5          |
| YBL103C                                          | RTG3          | YHR012W                 | VPS29         |
| YKL213C                                          | DOA1          | YHR167W                 | THP2          |
| YJR090C                                          | GRR1          | YDR310C                 | SUM1          |
| YLR456W                                          | YLR456W       | YKR084C                 | HBS1          |
| YLR102C                                          | APC9          | YHR152W                 | SPO12         |
| YNL094W                                          | APP1          | YHR016C                 | YSC84         |
| YJR040W                                          | GEF1          | YJL004C                 | SYS1          |
| YGR108W                                          | CLB1          | YLR381W                 | CTF3          |
| YPL115C                                          | BEM3          | YHR134W                 | WSS1          |
| YGR217W                                          | CCH1          | YBR200W                 | BEM1          |
| YHR013C                                          | ARD1          | YOR141C                 | ARP8          |
| YFL023W                                          | BUD27         | YJR032W                 | CPR7          |
| YDR484W                                          | VPS52         | YMR214W                 | SCJ1          |
| YMR199W                                          | CLN1          | YNL116W                 | DMA2          |
| YGL115W                                          | SNF4          | YOL081W                 | IRA2          |
| YLR192C                                          | HCR1          | YFR036W                 | CDC26         |
| YBR278W                                          | DPB3          | YMR055C                 | BUB2          |



| Predictions at threshold level 0.80 continued... |               |                         |               |
|--------------------------------------------------|---------------|-------------------------|---------------|
| Gene1 of predicted pair                          |               | Gene2 of predicted pair |               |
| Systematic Name                                  | Standard Name | Systematic Name         | Standard Name |
| YLL039C                                          | UBI4          | YDR245W                 | MNN10         |
| YPL253C                                          | VIK1          | YGR188C                 | BUB1          |
| YOR038C                                          | HIR2          | YMR038C                 | CCS1          |
| YMR198W                                          | CIK1          | YJR060W                 | CBF1          |
| YPR017C                                          | DSS4          | YPL105C                 | YPL105C       |
| YMR198W                                          | CIK1          | YDL006W                 | PTC1          |
| YOR337W                                          | TEA1          | YHR156C                 | LIN1          |
| YLR399C                                          | BDF1          | YOR038C                 | HIR2          |
| YIR009W                                          | MSL1          | YPL178W                 | CBC2          |
| YOR275C                                          | RIM20         | YGR135W                 | PRE9          |
| YBR217W                                          | ATG12         | YML115C                 | VAN1          |
| YFL033C                                          | RIM15         | YJL004C                 | SYS1          |
| YKL032C                                          | IXR1          | YGR135W                 | PRE9          |
| YML095C                                          | RAD10         | YJR035W                 | RAD26         |
| YOL121C                                          | RPS19A        | YNL076W                 | MKS1          |
| YGR020C                                          | VMA7          | YKL119C                 | VPH2          |
| YDR443C                                          | SSN2          | YLR370C                 | ARC18         |
| YDR254W                                          | CHL4          | YDR171W                 | HSP42         |
| YBR200W                                          | BEM1          | YHR061C                 | GIC1          |
| YGR249W                                          | MGA1          | YHR081W                 | LRP1          |
| YLR399C                                          | BDF1          | YJR063W                 | RPA12         |
| YCL001W                                          | RER1          | YNR032W                 | PPG1          |
| YDR108W                                          | GSG1          | YPL234C                 | TFP3          |
| YOR270C                                          | VPH1          | YLR370C                 | ARC18         |
| YDL020C                                          | RPN4          | YHL030W                 | ECM29         |
| YBR131W                                          | CCZ1          | YNL238W                 | KEX2          |
| YBR195C                                          | MSI1          | YOR368W                 | RAD17         |
| YJL078C                                          | PRY3          | YKR093W                 | PTR2          |
| YBR111W-A                                        | SUS1          | YOL012C                 | HTZ1          |

| Predictions at threshold level 0.80 continued... |               |                         |               |
|--------------------------------------------------|---------------|-------------------------|---------------|
| Gene1 of predicted pair                          |               | Gene2 of predicted pair |               |
| Systematic Name                                  | Standard Name | Systematic Name         | Standard Name |
| YLR018C                                          | POM34         | YMR164C                 | MSS11         |
| YJR060W                                          | CBF1          | YML112W                 | CTK3          |
| YDR080W                                          | VPS41         | YOR327C                 | SNC2          |
| YGL033W                                          | HOP2          | YPL137C                 | GIP3          |
| YMR026C                                          | PEX12         | YOL111C                 | MDY2          |
| YFL047W                                          | RGD2          | YKR024C                 | DBP7          |
| YLR381W                                          | CTF3          | YLR429W                 | CRN1          |
| YPL057C                                          | SUR1          | YLR320W                 | MMS22         |
| YER087C-B                                        | SBH1          | YLR113W                 | HOG1          |
| YNL032W                                          | SIW14         | YKR035W-A               | DID2          |
| YER162C                                          | RAD4          | YEL060C                 | PRB1          |
| YKR014C                                          | YPT52         | YGL198W                 | YIP4          |
| YMR198W                                          | CIK1          | YOR368W                 | RAD17         |
| YKR099W                                          | BAS1          | YMR133W                 | REC114        |
| YBR260C                                          | RGD1          | YER049W                 | TPA1          |
| YMR016C                                          | SOK2          | YLR398C                 | SKI2          |
| YFR010W                                          | UBP6          | YDL155W                 | CLB3          |
| YBR131W                                          | CCZ1          | YDL006W                 | PTC1          |
| YGL115W                                          | SNF4          | YPR032W                 | SRO7          |
| YMR224C                                          | MRE11         | YLR254C                 | NDL1          |
| YNR072W                                          | HXT17         | YOR327C                 | SNC2          |
| YIL076W                                          | SEC28         | YBR215W                 | HPC2          |
| YGR019W                                          | UGA1          | YBR200W                 | BEM1          |
| YKL135C                                          | APL2          | YPL259C                 | APM1          |
| YKL135C                                          | APL2          | YJR125C                 | ENT3          |
| YBR041W                                          | FAT1          | YOR275C                 | RIM20         |
| YDR004W                                          | RAD57         | YLR150W                 | STM1          |
| YLR102C                                          | APC9          | YDR507C                 | GIN4          |
| YGR249W                                          | MGA1          | YKL048C                 | ELM1          |

| Predictions at threshold level 0.80 continued... |               |                         |               |
|--------------------------------------------------|---------------|-------------------------|---------------|
| Gene1 of predicted pair                          |               | Gene2 of predicted pair |               |
| Systematic Name                                  | Standard Name | Systematic Name         | Standard Name |
| YGL147C                                          | RPL9A         | YOR043W                 | WHI2          |
| YEL003W                                          | GIM4          | YHR056C                 | RSC30         |
| YDL223C                                          | HBT1          | YOR327C                 | SNC2          |
| YPL213W                                          | LEA1          | YDR440W                 | DOT1          |
| YJR060W                                          | CBF1          | YPL106C                 | SSE1          |
| YLR090W                                          | XDJ1          | YNL058C                 | YNL058C       |
| YDR004W                                          | RAD57         | YNL215W                 | IES2          |
| YAL024C                                          | LTE1          | YBR057C                 | MUM2          |
| YIL103W                                          | DPH1          | YNL225C                 | CNM67         |
| YGR261C                                          | APL6          | YNR032W                 | PPG1          |
| YNR072W                                          | HXT17         | YMR230W                 | RPS10B        |
| YGL190C                                          | CDC55         | YHR191C                 | CTF8          |
| YNL069C                                          | RPL16B        | YDR108W                 | GSG1          |
| YDR289C                                          | RTT103        | YOR124C                 | UBP2          |
| YLR043C                                          | TRX1          | YLR309C                 | IMH1          |
| YHR156C                                          | LIN1          | YOR066W                 | MSA1          |
| YMR164C                                          | MSS11         | YMR125W                 | STO1          |
| YJL176C                                          | SWI3          | YLR018C                 | POM34         |
| YLR090W                                          | XDJ1          | YDR484W                 | VPS52         |
| YDR335W                                          | MSN5          | YJR063W                 | RPA12         |
| YDR363W-A                                        | SEM1          | YER122C                 | GLO3          |
| YJL172W                                          | CPS1          | YNL238W                 | KEX2          |
| YKR059W                                          | TIF1          | YLR288C                 | MEC3          |
| YMR224C                                          | MRE11         | YBL101C                 | ECM21         |
| YMR095C                                          | SNO1          | YPR046W                 | MCM16         |
| YLR337C                                          | VRP1          | YPL161C                 | BEM4          |
| YBR108W                                          | YBR108W       | YAR014C                 | BUD14         |
| YBL102W                                          | SFT2          | YPL161C                 | BEM4          |
| YGL212W                                          | VAM7          | YOR327C                 | SNC2          |

| Predictions at threshold level 0.80 continued... |               |                         |               |
|--------------------------------------------------|---------------|-------------------------|---------------|
| Gene1 of predicted pair                          |               | Gene2 of predicted pair |               |
| Systematic Name                                  | Standard Name | Systematic Name         | Standard Name |
| YPR046W                                          | MCM16         | YHR115C                 | DMA1          |
| YLR079W                                          | SIC1          | YGR188C                 | BUB1          |
| YBL079W                                          | NUP170        | YOL090W                 | MSH2          |
| YOR195W                                          | SLK19         | YBL031W                 | SHE1          |
| YOR140W                                          | SFL1          | YBR260C                 | RGD1          |
| YML038C                                          | YMD8          | YDL006W                 | PTC1          |
| YNR072W                                          | HXT17         | YBR036C                 | CSG2          |
| YDR448W                                          | ADA2          | YLR357W                 | RSC2          |
| YOR127W                                          | RGA1          | YPL120W                 | VPS30         |
| YIL076W                                          | SEC28         | YBR280C                 | SAF1          |
| YGL212W                                          | VAM7          | YOR312C                 | RPL20B        |
| YER044C                                          | ERG28         | YLR452C                 | SST2          |
| YLR288C                                          | MEC3          | YGL151W                 | NUT1          |
| YKL032C                                          | IXR1          | YBL087C                 | RPL23A        |
| YGL087C                                          | MMS2          | YLR079W                 | SIC1          |
| YNL325C                                          | FIG4          | YNL058C                 | YNL058C       |
| YJR063W                                          | RPA12         | YOL054W                 | PSH1          |
| YKL160W                                          | ELF1          | YGL019W                 | CKB1          |
| YDL155W                                          | CLB3          | YDR310C                 | SUM1          |
| YLR234W                                          | TOP3          | YKL101W                 | HSL1          |
| YMR164C                                          | MSS11         | YKR024C                 | DBP7          |
| YBR030W                                          | YBR030W       | YBL025W                 | RRN10         |
| YPL137C                                          | GIP3          | YOR035C                 | SHE4          |
| YIL103W                                          | DPH1          | YOL054W                 | PSH1          |
| YOL145C                                          | CTR9          | YNL297C                 | MON2          |
| YDR293C                                          | SSD1          | YKR048C                 | NAP1          |
| YHR200W                                          | RPN10         | YNL076W                 | MKS1          |
| YDR004W                                          | RAD57         | YNL082W                 | PMS1          |
| YOR080W                                          | DIA2          | YOR001W                 | RRP6          |

| Predictions at threshold level 0.80 continued... |               |                         |               |
|--------------------------------------------------|---------------|-------------------------|---------------|
| Gene1 of predicted pair                          |               | Gene2 of predicted pair |               |
| Systematic Name                                  | Standard Name | Systematic Name         | Standard Name |
| YML001W                                          | YPT7          | YOL081W                 | IRA2          |
| YER161C                                          | SPT2          | YOR368W                 | RAD17         |
| YER116C                                          | SLX8          | YOR270C                 | VPH1          |
| YGL163C                                          | RAD54         | YBL087C                 | RPL23A        |
| YOR132W                                          | VPS17         | YDR108W                 | GSG1          |
| YMR224C                                          | MRE11         | YHR081W                 | LRP1          |
| YNL215W                                          | IES2          | YGR188C                 | BUB1          |
| YJL183W                                          | MNN11         | YBR280C                 | SAF1          |
| YGL223C                                          | COG1          | YPL037C                 | EGD1          |
| YDL059C                                          | RAD59         | YDR310C                 | SUM1          |
| YKL139W                                          | CTK1          | YOR066W                 | MSA1          |
| YDR293C                                          | SSD1          | YNL069C                 | RPL16B        |
| YLR381W                                          | CTF3          | YDR335W                 | MSN5          |
| YBR228W                                          | SLX1          | YOR243C                 | PUS7          |
| YML115C                                          | VAN1          | YDL083C                 | RPS16B        |
| YMR039C                                          | SUB1          | YBR278W                 | DPB3          |
| YHR098C                                          | SFB3          | YOL006C                 | TOP1          |
| YMR142C                                          | RPL13B        | YOR043W                 | WHI2          |
| YFR031C-A                                        | RPL2A         | YER122C                 | GLO3          |
| YOL054W                                          | PSH1          | YHR115C                 | DMA1          |
| YBR131W                                          | CCZ1          | YDR080W                 | VPS41         |
| YDL042C                                          | SIR2          | YNL031C                 | HHT2          |
| YMR016C                                          | SOK2          | YPR036W                 | VMA13         |
| YPL152W                                          | RRD2          | YAR014C                 | BUD14         |
| YNR052C                                          | POP2          | YHR111W                 | UBA4          |
| YOR083W                                          | WHI5          | YLR079W                 | SIC1          |
| YLL039C                                          | UBI4          | YGL212W                 | VAM7          |
| YBR108W                                          | YBR108W       | YOR290C                 | SNF2          |
| YPL253C                                          | VIK1          | YLR429W                 | CRN1          |

| Predictions at threshold level 0.80 continued... |               |                         |               |
|--------------------------------------------------|---------------|-------------------------|---------------|
| Gene1 of predicted pair                          |               | Gene2 of predicted pair |               |
| Systematic Name                                  | Standard Name | Systematic Name         | Standard Name |
| YDR320C                                          | SWA2          | YER120W                 | SCS2          |
| YOR001W                                          | RRP6          | YER122C                 | GLO3          |
| YNL215W                                          | IES2          | YLR386W                 | VAC14         |
| YMR172W                                          | HOT1          | YLR381W                 | CTF3          |
| YLR370C                                          | ARC18         | YNL076W                 | MKS1          |
| YER143W                                          | DDI1          | YGL095C                 | VPS45         |
| YCR066W                                          | RAD18         | YJR033C                 | RAV1          |
| YGR072W                                          | UPF3          | YDR207C                 | UME6          |
| YGL174W                                          | BUD13         | YDR335W                 | MSN5          |
| YBR108W                                          | YBR108W       | YJL172W                 | CPS1          |
| YBL102W                                          | SFT2          | YPR032W                 | SRO7          |
| YHR052W                                          | CIC1          | YJL189W                 | RPL39         |
| YDL077C                                          | VAM6          | YBR280C                 | SAF1          |
| YDL002C                                          | NHP10         | YBR195C                 | MSI1          |
| YMR199W                                          | CLN1          | YBL079W                 | NUP170        |
| YAL024C                                          | LTE1          | YOR141C                 | ARP8          |
| YHR039C-A                                        | VMA10         | YOL121C                 | RPS19A        |
| YLR452C                                          | SST2          | YPL195W                 | APL5          |
| YPL253C                                          | VIK1          | YDR183W                 | PLP1          |
| YJR032W                                          | CPR7          | YHL002W                 | HSE1          |
| YDL052C                                          | SLC1          | YKL140W                 | TGL1          |
| YHL031C                                          | GOS1          | YPR051W                 | MAK3          |
| YJL029C                                          | VPS53         | YOL018C                 | TLG2          |
| YKL116C                                          | PRR1          | YDL192W                 | ARF1          |
| YLR102C                                          | APC9          | YJL136C                 | RPS21B        |
| YNL206C                                          | RTT106        | YHR152W                 | SPO12         |
| YNL054W                                          | VAC7          | YHR013C                 | ARD1          |
| YPL037C                                          | EGD1          | YAL002W                 | VPS8          |
| YBL008W                                          | HIR1          | YHR178W                 | STB5          |

| Predictions at threshold level 0.80 continued... |               |                         |               |
|--------------------------------------------------|---------------|-------------------------|---------------|
| Gene1 of predicted pair                          |               | Gene2 of predicted pair |               |
| Systematic Name                                  | Standard Name | Systematic Name         | Standard Name |
| YBR128C                                          | ATG14         | YPR119W                 | CLB2          |
| YMR116C                                          | ASC1          | YOL081W                 | IRA2          |
| YBR030W                                          | YBR030W       | YBR108W                 | YBR108W       |
| YDR156W                                          | RPA14         | YJL117W                 | PHO86         |
| YOL090W                                          | MSH2          | YBR082C                 | UBC4          |
| YGL161C                                          | YIP5          | YER139C                 | YER139C       |
| YIL002C                                          | INP51         | YGL124C                 | MON1          |
| YBR200W                                          | BEM1          | YPR046W                 | MCM16         |
| YOR195W                                          | SLK19         | YDR318W                 | MCM21         |
| YGL147C                                          | RPL9A         | YBL025W                 | RRN10         |
| YIL076W                                          | SEC28         | YPR036W                 | VMA13         |
| YDR254W                                          | CHL4          | YCR086W                 | CSM1          |
| YBR260C                                          | RGD1          | YMR311C                 | GLC8          |
| YDR225W                                          | HTA1          | YDR440W                 | DOT1          |
| YDL020C                                          | RPN4          | YFR036W                 | CDC26         |
| YMR202W                                          | ERG2          | YJL058C                 | BIT61         |
| YER032W                                          | FIR1          | YOR363C                 | PIP2          |
| YHR111W                                          | UBA4          | YOL054W                 | PSH1          |
| YKR059W                                          | TIF1          | YLR350W                 | ORM2          |
| YDR289C                                          | RTT103        | YER122C                 | GLO3          |
| YMR026C                                          | PEX12         | YBR019C                 | GAL10         |
| YER110C                                          | KAP123        | YBR010W                 | HHT1          |
| YFR036W                                          | CDC26         | YCR053W                 | THR4          |
| YDL020C                                          | RPN4          | YHR167W                 | THP2          |
| YOR083W                                          | WHI5          | YOR080W                 | DIA2          |
| YER116C                                          | SLX8          | YMR016C                 | SOK2          |
| YNL025C                                          | SSN8          | YOR124C                 | UBP2          |
| YIL053W                                          | RHR2          | YLR192C                 | HCR1          |
| YLL007C                                          | YLL007C       | YPL018W                 | CTF19         |

| Predictions at threshold level 0.80 continued... |               |                         |               |
|--------------------------------------------------|---------------|-------------------------|---------------|
| Gene1 of predicted pair                          |               | Gene2 of predicted pair |               |
| Systematic Name                                  | Standard Name | Systematic Name         | Standard Name |
| YBR200W                                          | BEM1          | YBL047C                 | EDE1          |
| YER044C                                          | ERG28         | YLR370C                 | ARC18         |
| YLR192C                                          | HCR1          | YBL025W                 | RRN10         |
| YDR320C                                          | SWA2          | YHR012W                 | VPS29         |
| YJR060W                                          | CBF1          | YDR200C                 | VPS64         |
| YBR278W                                          | DPB3          | YGL151W                 | NUT1          |
| YIL159W                                          | BNR1          | YER044C                 | ERG28         |
| YMR116C                                          | ASC1          | YHR200W                 | RPN10         |
| YMR055C                                          | BUB2          | YLR435W                 | TSR2          |
| YPL096C-A                                        | ERI1          | YNL079C                 | TPM1          |
| YMR026C                                          | PEX12         | YNL076W                 | MKS1          |
| YML001W                                          | YPT7          | YPR032W                 | SRO7          |
| YBR200W                                          | BEM1          | YIL103W                 | DPH1          |
| YCR084C                                          | TUP1          | YPL248C                 | GAL4          |
| YLR090W                                          | XDJ1          | YDL083C                 | RPS16B        |
| YPR036W                                          | VMA13         | YLR398C                 | SKI2          |
| YCR066W                                          | RAD18         | YER120W                 | SCS2          |
| YKL135C                                          | APL2          | YPR119W                 | CLB2          |
| YER116C                                          | SLX8          | YFR036W                 | CDC26         |
| YEL053C                                          | MAK10         | YER139C                 | YER139C       |
| YDR335W                                          | MSN5          | YGR188C                 | BUB1          |
| YMR198W                                          | CIK1          | YKL101W                 | HSL1          |
| YKR072C                                          | SIS2          | YCR086W                 | CSM1          |
| YDR004W                                          | RAD57         | YGL148W                 | ARO2          |
| YLL007C                                          | YLL007C       | YGL151W                 | NUT1          |
| YMR026C                                          | PEX12         | YHR081W                 | LRP1          |
| YHR111W                                          | UBA4          | YGL031C                 | RPL24A        |
| YNL243W                                          | SLA2          | YHR181W                 | SVP26         |
| YIL034C                                          | CAP2          | YGR188C                 | BUB1          |



| Predictions at threshold level 0.80 continued... |               |                         |               |
|--------------------------------------------------|---------------|-------------------------|---------------|
| Gene1 of predicted pair                          |               | Gene2 of predicted pair |               |
| Systematic Name                                  | Standard Name | Systematic Name         | Standard Name |
| YNL297C                                          | MON2          | YHR060W                 | VMA22         |
| YOR106W                                          | VAM3          | YGL003C                 | CDH1          |
| YOR033C                                          | EXO1          | YHR010W                 | RPL27A        |
| YNL218W                                          | MGS1          | YDL013W                 | SLX5          |
| YLR429W                                          | CRN1          | YJR060W                 | CBF1          |
| YLR381W                                          | CTF3          | YKL114C                 | APN1          |
| YLL007C                                          | YLL007C       | YOR132W                 | VPS17         |
| YJL058C                                          | BIT61         | YLR370C                 | ARC18         |
| YKL101W                                          | HSL1          | YOR368W                 | RAD17         |
| YOL148C                                          | SPT20         | YGL252C                 | RTG2          |
| YGL223C                                          | COG1          | YGR105W                 | VMA21         |
| YKR001C                                          | VPS1          | YKL119C                 | VPH2          |
| YLR396C                                          | VPS33         | YDL077C                 | VAM6          |
| YPL047W                                          | SGF11         | YBR111W-A               | SUS1          |
| YMR273C                                          | ZDS1          | YDR227W                 | SIR4          |
| YBR200W                                          | BEM1          | YDR379W                 | RGA2          |
| YNL127W                                          | FAR11         | YPR032W                 | SRO7          |
| YPL024W                                          | RMI1          | YKR059W                 | TIF1          |
| YMR199W                                          | CLN1          | YKR024C                 | DBP7          |
| YER116C                                          | SLX8          | YGL163C                 | RAD54         |
| YHR200W                                          | RPN10         | YJL140W                 | RPB4          |
| YER162C                                          | RAD4          | YBL025W                 | RRN10         |
| YML016C                                          | PPZ1          | YDR289C                 | RTT103        |
| YMR224C                                          | MRE11         | YML016C                 | PPZ1          |
| YPL024W                                          | RMI1          | YML001W                 | YPT7          |
| YIL034C                                          | CAP2          | YDR254W                 | CHL4          |
| YBR108W                                          | YBR108W       | YDR261C                 | EXG2          |
| YHR111W                                          | UBA4          | YHR012W                 | VPS29         |
| YJR140C                                          | HIR3          | YPL079W                 | RPL21B        |

| Predictions at threshold level 0.80 continued... |               |                         |               |
|--------------------------------------------------|---------------|-------------------------|---------------|
| Gene1 of predicted pair                          |               | Gene2 of predicted pair |               |
| Systematic Name                                  | Standard Name | Systematic Name         | Standard Name |
| YNL201C                                          | PSY2          | YDR378C                 | LSM6          |
| YOR001W                                          | RRP6          | YBR215W                 | HPC2          |
| YKR099W                                          | BAS1          | YML071C                 | COG8          |
| YCL037C                                          | SRO9          | YDL077C                 | VAM6          |
| YBR200W                                          | BEM1          | YNL076W                 | MKS1          |
| YKL048C                                          | ELM1          | YJR060W                 | CBF1          |
| YMR116C                                          | ASC1          | YOR080W                 | DIA2          |
| YGL147C                                          | RPL9A         | YBR280C                 | SAF1          |
| YMR016C                                          | SOK2          | YPL195W                 | APL5          |
| YNR052C                                          | POP2          | YFR030W                 | MET10         |
| YGL163C                                          | RAD54         | YGR135W                 | PRE9          |
| YOR109W                                          | INP53         | YEL051W                 | VMA8          |
| YGL147C                                          | RPL9A         | YHR081W                 | LRP1          |
| YKR035W-A                                        | DID2          | YDR207C                 | UME6          |
| YLR441C                                          | RPS1A         | YGL212W                 | VAM7          |
| YHR013C                                          | ARD1          | YCR086W                 | CSM1          |
| YOR033C                                          | EXO1          | YDL020C                 | RPN4          |
| YIL002C                                          | INP51         | YDL226C                 | GCS1          |
| YBR126C                                          | TPS1          | YNL307C                 | MCK1          |
| YDL006W                                          | PTC1          | YER162C                 | RAD4          |
| YEL065W                                          | SIT1          | YLR441C                 | RPS1A         |
| YCL037C                                          | SRO9          | YLR182W                 | SWI6          |
| YML115C                                          | VAN1          | YNL117W                 | MLS1          |
| YNL243W                                          | SLA2          | YBR098W                 | MMS4          |
| YPL178W                                          | CBC2          | YMR125W                 | STO1          |
| YPL234C                                          | TFP3          | YER120W                 | SCS2          |
| YGL094C                                          | PAN2          | YBR089C-A               | NHP6B         |
| YNL288W                                          | CAF40         | YGR270W                 | YTA7          |
| YDR156W                                          | RPA14         | YPL089C                 | RLM1          |

| Predictions at threshold level 0.80 continued... |               |                         |               |
|--------------------------------------------------|---------------|-------------------------|---------------|
| Gene1 of predicted pair                          |               | Gene2 of predicted pair |               |
| Systematic Name                                  | Standard Name | Systematic Name         | Standard Name |
| YPL253C                                          | VIK1          | YDR335W                 | MSN5          |
| YLR095C                                          | IOC2          | YBR108W                 | YBR108W       |
| YDR443C                                          | SSN2          | YJR084W                 | CSN12         |
| YCR088W                                          | ABP1          | YLR370C                 | ARC18         |
| YDR379W                                          | RGA2          | YHR152W                 | SPO12         |
| YLR441C                                          | RPS1A         | YNL041C                 | COG6          |
| YLR234W                                          | TOP3          | YDR254W                 | CHL4          |
| YML062C                                          | MFT1          | YJR035W                 | RAD26         |
| YGR252W                                          | GCN5          | YBR089C-A               | NHP6B         |
| YNL201C                                          | PSY2          | YJL006C                 | CTK2          |
| YBR239C                                          | YBR239C       | YOR284W                 | HUA2          |
| YPL001W                                          | HAT1          | YER161C                 | SPT2          |
| YHR039C-A                                        | VMA10         | YMR054W                 | STV1          |
| YNL094W                                          | APP1          | YLR064W                 | YLR064W       |
| YBR217W                                          | ATG12         | YLR320W                 | MMS22         |
| YLR102C                                          | APC9          | YDR264C                 | AKR1          |
| YLR079W                                          | SIC1          | YKL101W                 | HSL1          |
| YMR052W                                          | FAR3          | YNL127W                 | FAR11         |
| YJL006C                                          | CTK2          | YIL103W                 | DPH1          |
| YDR253C                                          | MET32         | YLR079W                 | SIC1          |
| YOR290C                                          | SNF2          | YOR327C                 | SNC2          |
| YPL037C                                          | EGD1          | YPL195W                 | APL5          |
| YJL095W                                          | BCK1          | YBR036C                 | CSG2          |
| YML028W                                          | TSA1          | YJR035W                 | RAD26         |
| YPL253C                                          | VIK1          | YLR425W                 | TUS1          |
| YOR127W                                          | RGA1          | YGR135W                 | PRE9          |
| YBR114W                                          | RAD16         | YGR188C                 | BUB1          |
| YDR129C                                          | SAC6          | YGR135W                 | PRE9          |
| YLR133W                                          | CKI1          | YMR022W                 | UBC7          |

| Predictions at threshold level 0.80 continued... |               |                         |               |
|--------------------------------------------------|---------------|-------------------------|---------------|
| Gene1 of predicted pair                          |               | Gene2 of predicted pair |               |
| Systematic Name                                  | Standard Name | Systematic Name         | Standard Name |
| YLR093C                                          | NYV1          | YLR180W                 | SAM1          |
| YGL100W                                          | SEH1          | YNL082W                 | PMS1          |
| YDR318W                                          | MCM21         | YJL190C                 | RPS22A        |
| YDR004W                                          | RAD57         | YMR199W                 | CLN1          |
| YMR026C                                          | PEX12         | YHR156C                 | LIN1          |
| YOR069W                                          | VPS5          | YML071C                 | COG8          |
| YNL206C                                          | RTT106        | YPR120C                 | CLB5          |
| YLR337C                                          | VRP1          | YDR310C                 | SUM1          |
| YOR275C                                          | RIM20         | YHL011C                 | PRS3          |
| YFR031C-A                                        | RPL2A         | YHR156C                 | LIN1          |
| YDR293C                                          | SSD1          | YDR137W                 | RGP1          |
| YDL223C                                          | HBT1          | YLR370C                 | ARC18         |
| YDR363W-A                                        | SEM1          | YOR275C                 | RIM20         |
| YNL236W                                          | SIN4          | YJR135C                 | MCM22         |
| YPL253C                                          | VIK1          | YPL057C                 | SUR1          |
| YPL240C                                          | HSP82         | YCL018W                 | LEU2          |
| YER116C                                          | SLX8          | YDR254W                 | CHL4          |
| YPL234C                                          | TFP3          | YER162C                 | RAD4          |
| YIL076W                                          | SEC28         | YER116C                 | SLX8          |
| YHR178W                                          | STB5          | YLR381W                 | CTF3          |
| YMR167W                                          | MLH1          | YGL019W                 | CKB1          |
| YLR192C                                          | HCR1          | YNL041C                 | COG6          |
| YJR032W                                          | CPR7          | YJL095W                 | BCK1          |
| YPR084W                                          | YPR084W       | YFR031C-A               | RPL2A         |
| YMR109W                                          | MYO5          | YJR135C                 | MCM22         |
| YNL325C                                          | FIG4          | YML071C                 | COG8          |
| YGL078C                                          | DBP3          | YBR030W                 | YBR030W       |
| YLR064W                                          | YLR064W       | YHR016C                 | YSC84         |
| YJL036W                                          | SNX4          | YGL212W                 | VAM7          |

| Predictions at threshold level 0.80 continued... |               |                         |               |
|--------------------------------------------------|---------------|-------------------------|---------------|
| Gene1 of predicted pair                          |               | Gene2 of predicted pair |               |
| Systematic Name                                  | Standard Name | Systematic Name         | Standard Name |
| YER087C-B                                        | SBH1          | YBR171W                 | SEC66         |
| YBR126C                                          | TPS1          | YDL223C                 | HBT1          |
| YPL158C                                          | YPL158C       | YDL006W                 | PTC1          |
| YHR205W                                          | SCH9          | YNL199C                 | GCR2          |
| YOR191W                                          | RIS1          | YHR167W                 | THP2          |
| YNL215W                                          | IES2          | YKL110C                 | KTI12         |
| YLR119W                                          | SRN2          | YJR084W                 | CSN12         |
| YEL013W                                          | VAC8          | YMR038C                 | CCS1          |
| YNR032C-A                                        | HUB1          | YLR313C                 | SPH1          |
| YBR108W                                          | YBR108W       | YOR023C                 | AHC1          |
| YFR031C-A                                        | RPL2A         | YLR386W                 | VAC14         |
| YHR200W                                          | RPN10         | YKR020W                 | VPS51         |
| YDR363W-A                                        | SEM1          | YMR276W                 | DSK2          |
| YNL166C                                          | BNI5          | YJR135C                 | MCM22         |
| YBL103C                                          | RTG3          | YPL037C                 | EGD1          |
| YGL087C                                          | MMS2          | YAL002W                 | VPS8          |
| YDR108W                                          | GSG1          | YDR207C                 | UME6          |
| YPR051W                                          | MAK3          | YER122C                 | GLO3          |
| YNL307C                                          | MCK1          | YJL006C                 | CTK2          |
| YAL024C                                          | LTE1          | YER161C                 | SPT2          |
| YMR198W                                          | CIK1          | YDR318W                 | MCM21         |
| YFR010W                                          | UBP6          | YDL002C                 | NHP10         |
| YDR440W                                          | DOT1          | YDR289C                 | RTT103        |
| YKL025C                                          | PAN3          | YEL056W                 | HAT2          |
| YNL243W                                          | SLA2          | YBL047C                 | EDE1          |
| YER116C                                          | SLX8          | YLR313C                 | SPH1          |
| YER096W                                          | SHC1          | YGR188C                 | BUB1          |
| YPL042C                                          | SSN3          | YER161C                 | SPT2          |
| YPL137C                                          | GIP3          | YLR371W                 | ROM2          |

| Predictions at threshold level 0.80 continued... |               |                         |               |
|--------------------------------------------------|---------------|-------------------------|---------------|
| Gene1 of predicted pair                          |               | Gene2 of predicted pair |               |
| Systematic Name                                  | Standard Name | Systematic Name         | Standard Name |
| YER122C                                          | GLO3          | YDL137W                 | ARF2          |
| YER107C                                          | GLE2          | YNL271C                 | BNI1          |
| YDR383C                                          | NKP1          | YBR200W                 | BEM1          |
| YDL127W                                          | PCL2          | YDR076W                 | RAD55         |
| YNL238W                                          | KEX2          | YDL192W                 | ARF1          |
| YMR216C                                          | SKY1          | YHR039C-A               | VMA10         |
| YNL215W                                          | IES2          | YPR120C                 | CLB5          |
| YLR119W                                          | SRN2          | YLR094C                 | GIS3          |
| YDL083C                                          | RPS16B        | YOL081W                 | IRA2          |
| YBR107C                                          | IML3          | YOR014W                 | RTS1          |
| YBR171W                                          | SEC66         | YPL256C                 | CLN2          |
| YGR249W                                          | MGA1          | YLR093C                 | NYV1          |
| YOR001W                                          | RRP6          | YGL003C                 | CDH1          |
| YMR224C                                          | MRE11         | YLR320W                 | MMS22         |
| YIL034C                                          | CAP2          | YOR367W                 | SCP1          |
| YBR200W                                          | BEM1          | YPL253C                 | VIK1          |
| YIL076W                                          | SEC28         | YOR001W                 | RRP6          |
| YER120W                                          | SCS2          | YNL041C                 | COG6          |
| YMR179W                                          | SPT21         | YPR120C                 | CLB5          |
| YGR249W                                          | MGA1          | YKR035W-A               | DID2          |
| YAL024C                                          | LTE1          | YGR249W                 | MGA1          |
| YOR001W                                          | RRP6          | YDR318W                 | MCM21         |
| YKR059W                                          | TIF1          | YLR435W                 | TSR2          |
| YNL021W                                          | HDA1          | YDR295C                 | HDA2          |
| YDR318W                                          | MCM21         | YER122C                 | GLO3          |
| YBR200W                                          | BEM1          | YEL060C                 | PRB1          |
| YDR439W                                          | LRS4          | YNL116W                 | DMA2          |
| YNL087W                                          | TCB2          | YBR280C                 | SAF1          |
| YDL192W                                          | ARF1          | YBR036C                 | CSG2          |

| Predictions at threshold level 0.80 continued... |               |                         |               |
|--------------------------------------------------|---------------|-------------------------|---------------|
| Gene1 of predicted pair                          |               | Gene2 of predicted pair |               |
| Systematic Name                                  | Standard Name | Systematic Name         | Standard Name |
| YPL045W                                          | VPS16         | YOR035C                 | SHE4          |
| YJR060W                                          | CBF1          | YCR086W                 | CSM1          |
| YDL192W                                          | ARF1          | YNL051W                 | COG5          |
| YKR035W-A                                        | DID2          | YBR036C                 | CSG2          |
| YGR135W                                          | PRE9          | YMR038C                 | CCS1          |
| YDL056W                                          | MBP1          | YPL161C                 | BEM4          |
| YMR153W                                          | NUP53         | YLR370C                 | ARC18         |
| YDR385W                                          | EFT2          | YLR131C                 | ACE2          |
| YPL115C                                          | BEM3          | YGR188C                 | BUB1          |
| YGL135W                                          | RPL1B         | YGR105W                 | VMA21         |
| YNL206C                                          | RTT106        | YJL006C                 | CTK2          |
| YMR224C                                          | MRE11         | YLR192C                 | HCR1          |
| YGR054W                                          | YGR054W       | YEL056W                 | HAT2          |
| YDR484W                                          | VPS52         | YER122C                 | GLO3          |
| YBR010W                                          | HHT1          | YJL140W                 | RPB4          |
| YBL058W                                          | SHP1          | YLR398C                 | SKI2          |
| YFR010W                                          | UBP6          | YDR363W-A               | SEM1          |
| YFR010W                                          | UBP6          | YML071C                 | COG8          |
| YHL031C                                          | GOS1          | YDL192W                 | ARF1          |
| YPR084W                                          | YPR084W       | YDR080W                 | VPS41         |
| YHR134W                                          | WSS1          | YER116C                 | SLX8          |
| YFR031C-A                                        | RPL2A         | YOL018C                 | TLG2          |
| YNL201C                                          | PSY2          | YNL307C                 | MCK1          |
| YBR084C-A                                        | RPL19A        | YDR264C                 | AKR1          |
| YGL133W                                          | ITC1          | YJL136C                 | RPS21B        |
| YBR108W                                          | YBR108W       | YFL023W                 | BUD27         |
| YBR084C-A                                        | RPL19A        | YKL101W                 | HSL1          |
| YGR261C                                          | APL6          | YER122C                 | GLO3          |
| YDL020C                                          | RPN4          | YOR014W                 | RTS1          |

| Predictions at threshold level 0.80 continued... |               |                         |               |
|--------------------------------------------------|---------------|-------------------------|---------------|
| Gene1 of predicted pair                          |               | Gene2 of predicted pair |               |
| Systematic Name                                  | Standard Name | Systematic Name         | Standard Name |
| YMR273C                                          | ZDS1          | YIL033C                 | BCY1          |
| YDR261C                                          | EXG2          | YNL238W                 | KEX2          |
| YOR001W                                          | RRP6          | YML028W                 | TSA1          |
| YOR033C                                          | EXO1          | YJR035W                 | RAD26         |
| YLR079W                                          | SIC1          | YLR182W                 | SWI6          |
| YIL033C                                          | BCY1          | YJL164C                 | TPK1          |
| YBR217W                                          | ATG12         | YBR171W                 | SEC66         |
| YBR194W                                          | SOY1          | YER161C                 | SPT2          |
| YDR261C                                          | EXG2          | YNL041C                 | COG6          |
| YER116C                                          | SLX8          | YPR030W                 | CSR2          |
| YKL139W                                          | CTK1          | YGR188C                 | BUB1          |
| YNL201C                                          | PSY2          | YOL054W                 | PSH1          |
| YDR202C                                          | RAV2          | YAL002W                 | VPS8          |
| YNL054W                                          | VAC7          | YAL010C                 | MDM10         |
| YIL036W                                          | CST6          | YGR014W                 | MSB2          |
| YNL106C                                          | INP52         | YDR335W                 | MSN5          |
| YDR004W                                          | RAD57         | YHR200W                 | RPN10         |
| YLR119W                                          | SRN2          | YER144C                 | UBP5          |
| YNL025C                                          | SSN8          | YNL288W                 | CAF40         |
| YJR024C                                          | MDE1          | YMR199W                 | CLN1          |
| YML115C                                          | VAN1          | YKR035W-A               | DID2          |
| YNL201C                                          | PSY2          | YPR040W                 | TIP41         |
| YIL053W                                          | RHR2          | YPR036W                 | VMA13         |
| YPR018W                                          | RLF2          | YGL025C                 | PGD1          |
| YBL051C                                          | PIN4          | YGR054W                 | YGR054W       |
| YMR198W                                          | CIK1          | YHR200W                 | RPN10         |
| YHR111W                                          | UBA4          | YNL107W                 | YAF9          |
| YFR031C-A                                        | RPL2A         | YMR026C                 | PEX12         |
| YHR060W                                          | VMA22         | YCR053W                 | THR4          |



| Predictions at threshold level 0.80 continued... |               |                         |               |
|--------------------------------------------------|---------------|-------------------------|---------------|
| Gene1 of predicted pair                          |               | Gene2 of predicted pair |               |
| Systematic Name                                  | Standard Name | Systematic Name         | Standard Name |
| YMR199W                                          | CLN1          | YBR215W                 | HPC2          |
| YML095C                                          | RAD10         | YDL226C                 | GCS1          |
| YDR174W                                          | HMO1          | YDR254W                 | CHL4          |
| YBR019C                                          | GAL10         | YER040W                 | GLN3          |
| YOR141C                                          | ARP8          | YGR188C                 | BUB1          |
| YGR249W                                          | MGA1          | YLR441C                 | RPS1A         |
| YPR030W                                          | CSR2          | YNL076W                 | MKS1          |
| YLR429W                                          | CRN1          | YNL236W                 | SIN4          |
| YMR231W                                          | PEP5          | YOR036W                 | PEP12         |
| YBL058W                                          | SHP1          | YMR153W                 | NUP53         |
| YNL264C                                          | PDR17         | YOL110W                 | SHR5          |
| YDR108W                                          | GSG1          | YML038C                 | YMD8          |
| YDL047W                                          | SIT4          | YHR115C                 | DMA1          |
| YBL102W                                          | SFT2          | YOL108C                 | INO4          |
| YER116C                                          | SLX8          | YBR019C                 | GAL10         |
| YMR026C                                          | PEX12         | YKL116C                 | PRR1          |
| YEL065W                                          | SIT1          | YPL037C                 | EGD1          |
| YOR035C                                          | SHE4          | YER122C                 | GLO3          |
| YBR215W                                          | HPC2          | YEL056W                 | HAT2          |
| YMR224C                                          | MRE11         | YDL184C                 | RPL41A        |
| YBR194W                                          | SOY1          | YGL174W                 | BUD13         |
| YFL013C                                          | IES1          | YDR245W                 | MNN10         |
| YBR274W                                          | CHK1          | YGL175C                 | SAE2          |
| YML001W                                          | YPT7          | YGR105W                 | VMA21         |
| YNL215W                                          | IES2          | YHR013C                 | ARD1          |
| YHR200W                                          | RPN10         | YOR308C                 | SNU66         |
| YHR178W                                          | STB5          | YGL151W                 | NUT1          |
| YOR085W                                          | OST3          | YML019W                 | OST6          |
| YPL239W                                          | YAR1          | YKL143W                 | LTV1          |

| Predictions at threshold level 0.80 continued... |               |                         |               |
|--------------------------------------------------|---------------|-------------------------|---------------|
| Gene1 of predicted pair                          |               | Gene2 of predicted pair |               |
| Systematic Name                                  | Standard Name | Systematic Name         | Standard Name |
| YDR083W                                          | RRP8          | YOR001W                 | RRP6          |
| YDL059C                                          | RAD59         | YOR312C                 | RPL20B        |
| YHR156C                                          | LIN1          | YGL124C                 | MON1          |
| YNL032W                                          | SIW14         | YGL212W                 | VAM7          |
| YKR101W                                          | SIR1          | YKL160W                 | ELF1          |
| YGR104C                                          | SRB5          | YLR350W                 | ORM2          |
| YOR290C                                          | SNF2          | YBR280C                 | SAF1          |
| YMR080C                                          | NAM7          | YHR167W                 | THP2          |
| YBR131W                                          | CCZ1          | YKL048C                 | ELM1          |
| YMR311C                                          | GLC8          | YER122C                 | GLO3          |
| YDL232W                                          | OST4          | YER019C-A               | SBH2          |
| YMR152W                                          | YIM1          | YBR019C                 | GAL10         |
| YGR249W                                          | MGA1          | YNL032W                 | SIW14         |
| YKL116C                                          | PRR1          | YPL137C                 | GIP3          |
| YLR441C                                          | RPS1A         | YMR214W                 | SCJ1          |
| YKL160W                                          | ELF1          | YLR315W                 | NKP2          |
| YML115C                                          | VAN1          | YOR014W                 | RTS1          |
| YPR040W                                          | TIP41         | YJL095W                 | BCK1          |
| YLR292C                                          | SEC72         | YER110C                 | KAP123        |
| YMR153W                                          | NUP53         | YKL068W                 | NUP100        |
| YCL001W                                          | RER1          | YDL006W                 | PTC1          |
| YBR228W                                          | SLX1          | YER116C                 | SLX8          |
| YHR039C-A                                        | VMA10         | YGR105W                 | VMA21         |
| YCR066W                                          | RAD18         | YOL108C                 | INO4          |
| YHR013C                                          | ARD1          | YDR440W                 | DOT1          |
| YLR370C                                          | ARC18         | YKL114C                 | APN1          |
| YNL032W                                          | SIW14         | YPL195W                 | APL5          |
| YLR058C                                          | SHM2          | YJR060W                 | CBF1          |
| YKL139W                                          | CTK1          | YNL329C                 | PEX6          |

| Predictions at threshold level 0.80 continued... |               |                         |               |
|--------------------------------------------------|---------------|-------------------------|---------------|
| Gene1 of predicted pair                          |               | Gene2 of predicted pair |               |
| Systematic Name                                  | Standard Name | Systematic Name         | Standard Name |
| YLR386W                                          | VAC14         | YLR447C                 | VMA6          |
| YML071C                                          | COG8          | YOL108C                 | INO4          |
| YMR199W                                          | CLN1          | YJL187C                 | SWE1          |
| YOR109W                                          | INP53         | YKR001C                 | VPS1          |
| YDL184C                                          | RPL41A        | YBR108W                 | YBR108W       |
| YKR001C                                          | VPS1          | YPL259C                 | APM1          |
| YOL121C                                          | RPS19A        | YJL183W                 | MNN11         |
| YMR091C                                          | NPL6          | YNL041C                 | COG6          |
| YOR195W                                          | SLK19         | YLR254C                 | NDL1          |
| YDR484W                                          | VPS52         | YDR358W                 | GGA1          |
| YHL031C                                          | GOS1          | YCR066W                 | RAD18         |
| YML115C                                          | VAN1          | YKR014C                 | YPT52         |
| YOR106W                                          | VAM3          | YML001W                 | YPT7          |
| YPR171W                                          | BSP1          | YNL106C                 | INP52         |
| YJL154C                                          | VPS35         | YER049W                 | TPA1          |
| YMR153W                                          | NUP53         | YNL087W                 | TCB2          |
| YER129W                                          | SAK1          | YDR507C                 | GIN4          |
| YMR116C                                          | ASC1          | YKR020W                 | VPS51         |
| YOR337W                                          | TEA1          | YDR484W                 | VPS52         |
| YDR245W                                          | MNN10         | YAL002W                 | VPS8          |
| YOR039W                                          | CKB2          | YOL081W                 | IRA2          |
| YMR311C                                          | GLC8          | YER049W                 | TPA1          |
| YNL199C                                          | GCR2          | YLR425W                 | TUS1          |
| YLR119W                                          | SRN2          | YDR310C                 | SUM1          |
| YDR108W                                          | GSG1          | YNL041C                 | COG6          |
| YCL037C                                          | SRO9          | YKR030W                 | GMH1          |
| YMR224C                                          | MRE11         | YLR399C                 | BDF1          |
| YBR131W                                          | CCZ1          | YDR202C                 | RAV2          |
| YPL042C                                          | SSN3          | YDR469W                 | SDC1          |

| Predictions at threshold level 0.80 continued... |               |                         |               |
|--------------------------------------------------|---------------|-------------------------|---------------|
| Gene1 of predicted pair                          |               | Gene2 of predicted pair |               |
| Systematic Name                                  | Standard Name | Systematic Name         | Standard Name |
| YOL111C                                          | MDY2          | YPL161C                 | BEM4          |
| YPL042C                                          | SSN3          | YHL031C                 | GOS1          |
| YPL022W                                          | RAD1          | YGL190C                 | CDC55         |
| YDR108W                                          | GSG1          | YDR202C                 | RAV2          |
| YMR224C                                          | MRE11         | YDR183W                 | PLP1          |
| YDL083C                                          | RPS16B        | YNL041C                 | COG6          |
| YLR360W                                          | VPS38         | YPR046W                 | MCM16         |
| YLR410W                                          | VIP1          | YOL090W                 | MSH2          |
| YPL089C                                          | RLM1          | YMR038C                 | CCS1          |
| YLR288C                                          | MEC3          | YMR167W                 | MLH1          |
| YJL154C                                          | VPS35         | YNL044W                 | YIP3          |
| YOR069W                                          | VPS5          | YAL002W                 | VPS8          |
| YDL175C                                          | AIR2          | YJL124C                 | LSM1          |
| YLR371W                                          | ROM2          | YGL124C                 | MON1          |
| YIR009W                                          | MSL1          | YJR050W                 | ISY1          |
| YOR106W                                          | VAM3          | YMR311C                 | GLC8          |
| YJL141C                                          | YAK1          | YPR119W                 | CLB2          |
| YLR370C                                          | ARC18         | YEL060C                 | PRB1          |
| YJL124C                                          | LSM1          | YOR038C                 | HIR2          |
| YPR030W                                          | CSR2          | YMR152W                 | YIM1          |
| YNL031C                                          | HHT2          | YOR038C                 | HIR2          |
| YDR484W                                          | VPS52         | YGL124C                 | MON1          |
| YMR109W                                          | MYO5          | YPL234C                 | TFP3          |
| YGR252W                                          | GCN5          | YCR084C                 | TUP1          |
| YHL031C                                          | GOS1          | YDR202C                 | RAV2          |
| YLR452C                                          | SST2          | YMR214W                 | SCJ1          |
| YBR194W                                          | SOY1          | YDR335W                 | MSN5          |
| YJL095W                                          | BCK1          | YLR032W                 | RAD5          |
| YKL116C                                          | PRR1          | YJR056C                 | YJR056C       |

| Predictions at threshold level 0.80 continued... |               |                         |               |
|--------------------------------------------------|---------------|-------------------------|---------------|
| Gene1 of predicted pair                          |               | Gene2 of predicted pair |               |
| Systematic Name                                  | Standard Name | Systematic Name         | Standard Name |
| YLR192C                                          | HCR1          | YGL124C                 | MON1          |
| YER161C                                          | SPT2          | YCR077C                 | PAT1          |
| YNL069C                                          | RPL16B        | YNL297C                 | MON2          |
| YMR038C                                          | CCS1          | YJR035W                 | RAD26         |
| YDR293C                                          | SSD1          | YDR144C                 | MKC7          |
| YGL003C                                          | CDH1          | YBR036C                 | CSG2          |
| YJL004C                                          | SYS1          | YER162C                 | RAD4          |
| YPL024W                                          | RMI1          | YJL124C                 | LSM1          |
| YNL291C                                          | MID1          | YPL057C                 | SUR1          |
| YGL124C                                          | MON1          | YDR207C                 | UME6          |
| YDR225W                                          | HTA1          | YHR200W                 | RPN10         |
| YBR200W                                          | BEM1          | YBR036C                 | CSG2          |
| YOR195W                                          | SLK19         | YNL236W                 | SIN4          |
| YBR228W                                          | SLX1          | YNL016W                 | PUB1          |
| YLR441C                                          | RPS1A         | YOR327C                 | SNC2          |
| YGR054W                                          | YGR054W       | YJR032W                 | CPR7          |
| YLR381W                                          | CTF3          | YNL107W                 | YAF9          |
| YGL163C                                          | RAD54         | YLR352W                 | YLR352W       |
| YGL161C                                          | YIP5          | YAL002W                 | VPS8          |
| YGL054C                                          | ERV14         | YER120W                 | SCS2          |
| YOR231W                                          | MKK1          | YPR119W                 | CLB2          |
| YGL212W                                          | VAM7          | YPR051W                 | MAK3          |
| YBL102W                                          | SFT2          | YNL051W                 | COG5          |
| YPL161C                                          | BEM4          | YEL056W                 | HAT2          |
| YNL325C                                          | FIG4          | YGL124C                 | MON1          |
| YKL126W                                          | YPK1          | YGL003C                 | CDH1          |
| YPR051W                                          | MAK3          | YHL020C                 | OPI1          |
| YCR086W                                          | CSM1          | YKL101W                 | HSL1          |
| YNL041C                                          | COG6          | YJL004C                 | SYS1          |

| Predictions at threshold level 0.80 continued... |               |                         |               |
|--------------------------------------------------|---------------|-------------------------|---------------|
| Gene1 of predicted pair                          |               | Gene2 of predicted pair |               |
| Systematic Name                                  | Standard Name | Systematic Name         | Standard Name |
| YGL178W                                          | MPT5          | YDR293C                 | SSD1          |
| YLR435W                                          | TSR2          | YJR032W                 | CPR7          |
| YML016C                                          | PPZ1          | YKR061W                 | KTR2          |
| YLR352W                                          | YLR352W       | YOR368W                 | RAD17         |
| YMR055C                                          | BUB2          | YMR167W                 | MLH1          |
| YBR278W                                          | DPB3          | YGL163C                 | RAD54         |
| YOR327C                                          | SNC2          | YNL116W                 | DMA2          |
| YCR066W                                          | RAD18         | YEL053C                 | MAK10         |
| YKL139W                                          | CTK1          | YPR036W                 | VMA13         |
| YIL159W                                          | BNR1          | YER040W                 | GLN3          |
| YLR410W                                          | VIP1          | YFR030W                 | MET10         |
| YBR108W                                          | YBR108W       | YJR032W                 | CPR7          |
| YOR080W                                          | DIA2          | YGL174W                 | BUD13         |
| YGL087C                                          | MMS2          | YOR368W                 | RAD17         |
| YBR127C                                          | VMA2          | YKL119C                 | VPH2          |
| YNL041C                                          | COG6          | YOL081W                 | IRA2          |
| YKL116C                                          | PRR1          | YEL060C                 | PRB1          |
| YOR101W                                          | RAS1          | YNL236W                 | SIN4          |
| YLR306W                                          | UBC12         | YMR038C                 | CCS1          |
| YML001W                                          | YPT7          | YOL121C                 | RPS19A        |
| YMR164C                                          | MSS11         | YGL016W                 | KAP122        |
| YLR352W                                          | YLR352W       | YML028W                 | TSA1          |
| YGL178W                                          | MPT5          | YGR200C                 | ELP2          |
| YGL212W                                          | VAM7          | YPL195W                 | APL5          |
| YEL009C                                          | GCN4          | YDR443C                 | SSN2          |
| YDR363W                                          | ESC2          | YNL243W                 | SLA2          |
| YNL325C                                          | FIG4          | YOL121C                 | RPS19A        |
| YGL078C                                          | DBP3          | YLR180W                 | SAM1          |
| YNL307C                                          | MCK1          | YLR094C                 | GIS3          |

| Predictions at threshold level 0.80 continued... |               |                         |               |
|--------------------------------------------------|---------------|-------------------------|---------------|
| Gene1 of predicted pair                          |               | Gene2 of predicted pair |               |
| Systematic Name                                  | Standard Name | Systematic Name         | Standard Name |
| YMR016C                                          | SOK2          | YLR452C                 | SST2          |
| YFR040W                                          | SAP155        | YDR310C                 | SUM1          |
| YDL184C                                          | RPL41A        | YDL192W                 | ARF1          |
| YCR088W                                          | ABP1          | YHR016C                 | YSC84         |
| YOR270C                                          | VPH1          | YPR046W                 | MCM16         |
| YJL124C                                          | LSM1          | YNL145W                 | MFA2          |
| YLL007C                                          | YLL007C       | YNL107W                 | YAF9          |
| YBR173C                                          | UMP1          | YNL307C                 | MCK1          |
| YDR443C                                          | SSN2          | YKL126W                 | YPK1          |
| YFR010W                                          | UBP6          | YBR215W                 | HPC2          |
| YOR332W                                          | VMA4          | YBL047C                 | EDE1          |
| YLR093C                                          | NYV1          | YLR398C                 | SKI2          |
| YHR081W                                          | LRP1          | YPR030W                 | CSR2          |
| YNL325C                                          | FIG4          | YMR214W                 | SCJ1          |
| YMR284W                                          | YKU70         | YGL031C                 | RPL24A        |
| YGL223C                                          | COG1          | YEL051W                 | VMA8          |
| YHR178W                                          | STB5          | YGL253W                 | HXK2          |
| YML001W                                          | YPT7          | YBR036C                 | CSG2          |
| YHR079C                                          | IRE1          | YGR252W                 | GCN5          |
| YML095C                                          | RAD10         | YDR289C                 | RTT103        |
| YGL241W                                          | KAP114        | YGR252W                 | GCN5          |
| YNL107W                                          | YAF9          | YOL108C                 | INO4          |
| YLR288C                                          | MEC3          | YMR231W                 | PEP5          |
| YMR016C                                          | SOK2          | YKL048C                 | ELM1          |
| YPL253C                                          | VIK1          | YMR055C                 | BUB2          |
| YBR019C                                          | GAL10         | YGL252C                 | RTG2          |
| YLR192C                                          | HCR1          | YPL161C                 | BEM4          |
| YBR200W                                          | BEM1          | YML071C                 | COG8          |
| YGR229C                                          | SMI1          | YGL190C                 | CDC55         |

| Predictions at threshold level 0.80 continued... |               |                         |               |
|--------------------------------------------------|---------------|-------------------------|---------------|
| Gene1 of predicted pair                          |               | Gene2 of predicted pair |               |
| Systematic Name                                  | Standard Name | Systematic Name         | Standard Name |
| YDR490C                                          | PKH1          | YHR205W                 | SCH9          |
| YDR293C                                          | SSD1          | YBR131W                 | CCZ1          |
| YIL053W                                          | RHR2          | YOL081W                 | IRA2          |
| YPL195W                                          | APL5          | YJL183W                 | MNN11         |
| YDR004W                                          | RAD57         | YDR097C                 | MSH6          |
| YDR335W                                          | MSN5          | YGL163C                 | RAD54         |
| YPL057C                                          | SUR1          | YNL199C                 | GCR2          |
| YBR200W                                          | BEM1          | YCR077C                 | PAT1          |
| YFR010W                                          | UBP6          | YER040W                 | GLN3          |
| YDR174W                                          | HMO1          | YMR055C                 | BUB2          |
| YOR008C                                          | SLG1          | YPL256C                 | CLN2          |
| YLR192C                                          | HCR1          | YNL087W                 | TCB2          |
| YDR244W                                          | PEX5          | YNL214W                 | PEX17         |
| YGL163C                                          | RAD54         | YOL054W                 | PSH1          |
| YJR040W                                          | GEF1          | YNL041C                 | COG6          |
| YKR059W                                          | TIF1          | YGL250W                 | RMR1          |
| YPL057C                                          | SUR1          | YJR135C                 | MCM22         |
| YKL129C                                          | MYO3          | YJL095W                 | BCK1          |
| YJL176C                                          | SWI3          | YHR077C                 | NMD2          |
| YMR127C                                          | SAS2          | YLR447C                 | VMA6          |
| YBR215W                                          | HPC2          | YBR089C-A               | NHP6B         |
| YGL200C                                          | EMP24         | YEL036C                 | ANP1          |
| YLR083C                                          | EMP70         | YEL053C                 | MAK10         |
| YDR156W                                          | RPA14         | YCR086W                 | CSM1          |
| YMR026C                                          | PEX12         | YER044C                 | ERG28         |
| YDL116W                                          | NUP84         | YDL101C                 | DUN1          |
| YKL139W                                          | CTK1          | YBL103C                 | RTG3          |
| YDL116W                                          | NUP84         | YDR335W                 | MSN5          |
| YPR036W                                          | VMA13         | YDL185W                 | TFP1          |



| Predictions at threshold level 0.80 continued... |               |                         |               |
|--------------------------------------------------|---------------|-------------------------|---------------|
| Gene1 of predicted pair                          |               | Gene2 of predicted pair |               |
| Systematic Name                                  | Standard Name | Systematic Name         | Standard Name |
| YBR084C-A                                        | RPL19A        | YBL047C                 | EDE1          |
| YFR010W                                          | UBP6          | YLR381W                 | CTF3          |
| YKR001C                                          | VPS1          | YJR032W                 | CPR7          |
| YGR108W                                          | CLB1          | YJR032W                 | CPR7          |
| YPL057C                                          | SUR1          | YMR133W                 | REC114        |
| YDR202C                                          | RAV2          | YNL041C                 | COG6          |
| YLR410W                                          | VIP1          | YOL091W                 | SPO21         |
| YOR106W                                          | VAM3          | YCR066W                 | RAD18         |
| YMR199W                                          | CLN1          | YDL006W                 | PTC1          |
| YHR134W                                          | WSS1          | YDR155C                 | CPR1          |
| YBR172C                                          | SMY2          | YPR119W                 | CLB2          |
| YDR183W                                          | PLP1          | YBR114W                 | RAD16         |
| YAL024C                                          | LTE1          | YFR010W                 | UBP6          |
| YML109W                                          | ZDS2          | YPL161C                 | BEM4          |
| YKL139W                                          | CTK1          | YLR371W                 | ROM2          |
| YBR194W                                          | SOY1          | YKL160W                 | ELF1          |
| YMR153W                                          | NUP53         | YOR035C                 | SHE4          |
| YMR192W                                          | GYL1          | YPR154W                 | PIN3          |
| YPL115C                                          | BEM3          | YBR200W                 | BEM1          |
| YOR038C                                          | HIR2          | YAL002W                 | VPS8          |
| YKL139W                                          | CTK1          | YNL031C                 | HHT2          |
| YNL199C                                          | GCR2          | YOR124C                 | UBP2          |
| YML117W                                          | NAB6          | YPL089C                 | RLM1          |
| YMR127C                                          | SAS2          | YDR310C                 | SUM1          |
| YLR386W                                          | VAC14         | YMR230W                 | RPS10B        |
| YBL058W                                          | SHP1          | YPL057C                 | SUR1          |
| YOR195W                                          | SLK19         | YGR184C                 | UBR1          |
| YPL137C                                          | GIP3          | YDR358W                 | GGA1          |
| YOL030W                                          | GAS5          | YML028W                 | TSA1          |

| Predictions at threshold level 0.80 continued... |               |                         |               |
|--------------------------------------------------|---------------|-------------------------|---------------|
| Gene1 of predicted pair                          |               | Gene2 of predicted pair |               |
| Systematic Name                                  | Standard Name | Systematic Name         | Standard Name |
| YMR199W                                          | CLN1          | YPR120C                 | CLB5          |
| YKL048C                                          | ELM1          | YMR230W                 | RPS10B        |
| YDR245W                                          | MNN10         | YHR158C                 | KEL1          |
| YNL307C                                          | MCK1          | YCR086W                 | CSM1          |
| YML001W                                          | YPT7          | YDL006W                 | PTC1          |
| YML013W                                          | UBX2          | YDL155W                 | CLB3          |
| YDL006W                                          | PTC1          | YAR014C                 | BUD14         |
| YEL043W                                          | YEL043W       | YDR310C                 | SUM1          |
| YMR026C                                          | PEX12         | YOR327C                 | SNC2          |
| YHR081W                                          | LRP1          | YOR035C                 | SHE4          |
| YKL126W                                          | YPK1          | YPR036W                 | VMA13         |
| YDR264C                                          | AKR1          | YKL101W                 | HSL1          |
| YKR099W                                          | BAS1          | YGL124C                 | MON1          |
| YMR224C                                          | MRE11         | YOR032C                 | HMS1          |
| YHR111W                                          | UBA4          | YPL018W                 | CTF19         |
| YDL184C                                          | RPL41A        | YMR133W                 | REC114        |
| YMR133W                                          | REC114        | YML071C                 | COG8          |
| YBL019W                                          | APN2          | YHR056C                 | RSC30         |
| YDR261C                                          | EXG2          | YBR019C                 | GAL10         |
| YDR129C                                          | SAC6          | YFR040W                 | SAP155        |
| YGR072W                                          | UPF3          | YPL120W                 | VPS30         |
| YOR112W                                          | CEX1          | YDR202C                 | RAV2          |
| YOR358W                                          | HAP5          | YDR183W                 | PLP1          |
| YIL034C                                          | CAP2          | YPR051W                 | MAK3          |
| YML071C                                          | COG8          | YEL060C                 | PRB1          |
| YBR089C-A                                        | NHP6B         | YLR357W                 | RSC2          |
| YKR101W                                          | SIR1          | YNL107W                 | YAF9          |
| YMR133W                                          | REC114        | YPL195W                 | APL5          |
| YDL116W                                          | NUP84         | YIR005W                 | IST3          |

| Predictions at threshold level 0.80 continued... |               |                         |               |
|--------------------------------------------------|---------------|-------------------------|---------------|
| Gene1 of predicted pair                          |               | Gene2 of predicted pair |               |
| Systematic Name                                  | Standard Name | Systematic Name         | Standard Name |
| YDL059C                                          | RAD59         | YJR035W                 | RAD26         |
| YBR108W                                          | YBR108W       | YMR214W                 | SCJ1          |
| YER116C                                          | SLX8          | YMR055C                 | BUB2          |
| YNL025C                                          | SSN8          | YDR335W                 | MSN5          |
| YNL135C                                          | FPR1          | YGL212W                 | VAM7          |
| YBL103C                                          | RTG3          | YLR094C                 | GIS3          |
| YCR065W                                          | HCM1          | YJR060W                 | CBF1          |
| YJL095W                                          | BCK1          | YLR233C                 | EST1          |
| YOR212W                                          | STE4          | YPL161C                 | BEM4          |
| YFR031C-A                                        | RPL2A         | YPL024W                 | RMI1          |
| YBR200W                                          | BEM1          | YMR152W                 | YIM1          |
| YMR216C                                          | SKY1          | YCL001W                 | RER1          |
| YKL068W                                          | NUP100        | YGR059W                 | SPR3          |
| YDR245W                                          | MNN10         | YLR315W                 | NKP2          |
| YAL024C                                          | LTE1          | YGL025C                 | PGD1          |
| YBR173C                                          | UMP1          | YML115C                 | VAN1          |
| YDR293C                                          | SSD1          | YMR055C                 | BUB2          |
| YAL024C                                          | LTE1          | YKL080W                 | VMA5          |
| YHR156C                                          | LIN1          | YBR019C                 | GAL10         |
| YDR439W                                          | LRS4          | YIL103W                 | DPH1          |
| YDL006W                                          | PTC1          | YLR398C                 | SKI2          |
| YOR076C                                          | SKI7          | YCL037C                 | SRO9          |
| YDL042C                                          | SIR2          | YMR273C                 | ZDS1          |
| YLR447C                                          | VMA6          | YMR054W                 | STV1          |
| YNL044W                                          | YIP3          | YOL018C                 | TLG2          |
| YKL116C                                          | PRR1          | YER116C                 | SLX8          |
| YKL048C                                          | ELM1          | YHL002W                 | HSE1          |
| YGR004W                                          | PEX31         | YBR168W                 | PEX32         |
| YMR273C                                          | ZDS1          | YDR309C                 | GIC2          |

| Predictions at threshold level 0.80 continued... |               |                         |               |
|--------------------------------------------------|---------------|-------------------------|---------------|
| Gene1 of predicted pair                          |               | Gene2 of predicted pair |               |
| Systematic Name                                  | Standard Name | Systematic Name         | Standard Name |
| YIL053W                                          | RHR2          | YLR441C                 | RPS1A         |
| YGR166W                                          | KRE11         | YEL022W                 | GEA2          |
| YMR205C                                          | PFK2          | YJL117W                 | PHO86         |
| YDR477W                                          | SNF1          | YOR043W                 | WHI2          |
| YML016C                                          | PPZ1          | YOR368W                 | RAD17         |
| YMR116C                                          | ASC1          | YNL079C                 | TPM1          |
| YDR254W                                          | CHL4          | YJR135C                 | MCM22         |
| YKL116C                                          | PRR1          | YFL023W                 | BUD27         |
| YMR016C                                          | SOK2          | YGL115W                 | SNF4          |
| YDR254W                                          | CHL4          | YDL226C                 | GCS1          |
| YIL034C                                          | CAP2          | YCR088W                 | ABP1          |
| YLR386W                                          | VAC14         | YJL136C                 | RPS21B        |
| YGL115W                                          | SNF4          | YJL004C                 | SYS1          |
| YAL051W                                          | OAF1          | YGL161C                 | YIP5          |
| YNL068C                                          | FKH2          | YKL101W                 | HSL1          |
| YLR386W                                          | VAC14         | YGL031C                 | RPL24A        |
| YKL074C                                          | MUD2          | YLR357W                 | RSC2          |
| YAL024C                                          | LTE1          | YMR026C                 | PEX12         |
| YLR079W                                          | SIC1          | YJR060W                 | CBF1          |
| YOL111C                                          | MDY2          | YFR036W                 | CDC26         |
| YKR001C                                          | VPS1          | YNL107W                 | YAF9          |
| YNL291C                                          | MID1          | YNL117W                 | MLS1          |
| YLR095C                                          | IOC2          | YFR031C-A               | RPL2A         |
| YLR095C                                          | IOC2          | YMR214W                 | SCJ1          |
| YOL121C                                          | RPS19A        | YBR280C                 | SAF1          |
| YOR308C                                          | SNU66         | YBR036C                 | CSG2          |
| YPL024W                                          | RMI1          | YDR207C                 | UME6          |
| YLR337C                                          | VRP1          | YLR381W                 | CTF3          |
| YPR036W                                          | VMA13         | YPL037C                 | EGD1          |

| Predictions at threshold level 0.80 continued... |               |                         |               |
|--------------------------------------------------|---------------|-------------------------|---------------|
| Gene1 of predicted pair                          |               | Gene2 of predicted pair |               |
| Systematic Name                                  | Standard Name | Systematic Name         | Standard Name |
| YJR024C                                          | MDE1          | YGR059W                 | SPR3          |
| YKL126W                                          | YPK1          | YNL079C                 | TPM1          |
| YDR329C                                          | PEX3          | YGR077C                 | PEX8          |
| YLR090W                                          | XDJ1          | YLR370C                 | ARC18         |
| YGL054C                                          | ERV14         | YNL041C                 | COG6          |
| YPR084W                                          | YPR084W       | YKR020W                 | VPS51         |
| YMR198W                                          | CIK1          | YDR207C                 | UME6          |
| YDR334W                                          | SWR1          | YGL094C                 | PAN2          |
| YLR095C                                          | IOC2          | YDR484W                 | VPS52         |
| YGR135W                                          | PRE9          | YBL087C                 | RPL23A        |
| YKL116C                                          | PRR1          | YJR032W                 | CPR7          |
| YNL201C                                          | PSY2          | YBL046W                 | PSY4          |
| YLR429W                                          | CRN1          | YJR135C                 | MCM22         |
| YKL010C                                          | UFD4          | YHL002W                 | HSE1          |
| YJL053W                                          | PEP8          | YOR035C                 | SHE4          |
| YER162C                                          | RAD4          | YNR032W                 | PPG1          |
| YOR132W                                          | VPS17         | YNL044W                 | YIP3          |
| YJL080C                                          | SCP160        | YOR198C                 | BFR1          |
| YML016C                                          | PPZ1          | YOL054W                 | PSH1          |
| YLR386W                                          | VAC14         | YLR441C                 | RPS1A         |
| YNL041C                                          | COG6          | YER139C                 | YER139C       |
| YJR083C                                          | ACF4          | YHR016C                 | YSC84         |
| YNL068C                                          | FKH2          | YGL163C                 | RAD54         |
| YPL057C                                          | SUR1          | YNL307C                 | MCK1          |
| YKR061W                                          | KTR2          | YFR030W                 | MET10         |
| YGL124C                                          | MON1          | YLR180W                 | SAM1          |
| YPR171W                                          | BSP1          | YIL034C                 | CAP2          |
| YKL048C                                          | ELM1          | YEL053C                 | MAK10         |
| YLR083C                                          | EMP70         | YMR004W                 | MVP1          |

| Predictions at threshold level 0.80 continued... |               |                         |               |
|--------------------------------------------------|---------------|-------------------------|---------------|
| Gene1 of predicted pair                          |               | Gene2 of predicted pair |               |
| Systematic Name                                  | Standard Name | Systematic Name         | Standard Name |
| YLR337C                                          | VRP1          | YJR032W                 | CPR7          |
| YDR443C                                          | SSN2          | YGL078C                 | DBP3          |
| YOR083W                                          | WHI5          | YJL006C                 | CTK2          |
| YOR290C                                          | SNF2          | YDR261C                 | EXG2          |
| YML071C                                          | COG8          | YLR309C                 | IMH1          |
| YDL116W                                          | NUP84         | YLR254C                 | NDL1          |
| YLR018C                                          | POM34         | YDR192C                 | NUP42         |
| YHL020C                                          | OPI1          | YPR119W                 | CLB2          |
| YJL176C                                          | SWI3          | YOR038C                 | HIR2          |
| YJR082C                                          | EAF6          | YNL107W                 | YAF9          |
| YLR399C                                          | BDF1          | YDR318W                 | MCM21         |
| YNL201C                                          | PSY2          | YDR174W                 | HMO1          |
| YPR040W                                          | TIP41         | YJL187C                 | SWE1          |
| YBL047C                                          | EDE1          | YOR014W                 | RTS1          |
| YPL037C                                          | EGD1          | YGL003C                 | CDH1          |
| YDR383C                                          | NKP1          | YBR107C                 | IML3          |
| YBL058W                                          | SHP1          | YDR363W-A               | SEM1          |
| YDR320C                                          | SWA2          | YMR054W                 | STV1          |
| YDR156W                                          | RPA14         | YFR030W                 | MET10         |
| YKL126W                                          | YPK1          | YBL067C                 | UBP13         |
| YNL147W                                          | LSM7          | YNL107W                 | YAF9          |
| YKL025C                                          | PAN3          | YAL002W                 | VPS8          |
| YBR173C                                          | UMP1          | YDR484W                 | VPS52         |
| YER122C                                          | GLO3          | YNR032W                 | PPG1          |
| YJR060W                                          | CBF1          | YDR289C                 | RTT103        |
| YMR055C                                          | BUB2          | YIL103W                 | DPH1          |
| YDL059C                                          | RAD59         | YGL163C                 | RAD54         |
| YNL291C                                          | MID1          | YMR004W                 | MVP1          |
| YKL116C                                          | PRR1          | YFR036W                 | CDC26         |

| Predictions at threshold level 0.80 continued... |               |                         |               |
|--------------------------------------------------|---------------|-------------------------|---------------|
| Gene1 of predicted pair                          |               | Gene2 of predicted pair |               |
| Systematic Name                                  | Standard Name | Systematic Name         | Standard Name |
| YPL050C                                          | MNN9          | YDR310C                 | SUM1          |
| YBR194W                                          | SOY1          | YLR315W                 | NKP2          |
| YNL238W                                          | KEX2          | YOR327C                 | SNC2          |
| YDL005C                                          | MED2          | YBR010W                 | HHT1          |
| YAR064W                                          | YAR064W       | YPL240C                 | HSP82         |
| YDR080W                                          | VPS41         | YGL115W                 | SNF4          |
| YNL307C                                          | MCK1          | YHR060W                 | VMA22         |
| YLR386W                                          | VAC14         | YGR054W                 | YGR054W       |
| YBR274W                                          | CHK1          | YLR350W                 | ORM2          |
| YHR124W                                          | NDT80         | YJL106W                 | IME2          |
| YNL238W                                          | KEX2          | YMR230W                 | RPS10B        |
| YPL152W                                          | RRD2          | YFR030W                 | MET10         |
| YMR055C                                          | BUB2          | YGR135W                 | PRE9          |
| YFR034C                                          | PHO4          | YOL108C                 | INO4          |
| YKR057W                                          | RPS21A        | YDR363W-A               | SEM1          |
| YBR107C                                          | IML3          | YPR046W                 | MCM16         |
| YMR026C                                          | PEX12         | YBR036C                 | CSG2          |
| YKL135C                                          | APL2          | YAL030W                 | SNC1          |
| YEL056W                                          | HAT2          | YOR368W                 | RAD17         |
| YDR254W                                          | CHL4          | YHR013C                 | ARD1          |
| YMR055C                                          | BUB2          | YHR061C                 | GIC1          |
| YKR035W-A                                        | DID2          | YNL238W                 | KEX2          |
| YGL237C                                          | HAP2          | YDR310C                 | SUM1          |
| YDR443C                                          | SSN2          | YLR180W                 | SAM1          |
| YBL047C                                          | EDE1          | YPL161C                 | BEM4          |
| YDR146C                                          | SWI5          | YGL025C                 | PGD1          |
| YBR200W                                          | BEM1          | YGR054W                 | YGR054W       |
| YDL077C                                          | VAM6          | YER040W                 | GLN3          |
| YHR060W                                          | VMA22         | YMR133W                 | REC114        |

| Predictions at threshold level 0.80 continued... |               |                         |               |
|--------------------------------------------------|---------------|-------------------------|---------------|
| Gene1 of predicted pair                          |               | Gene2 of predicted pair |               |
| Systematic Name                                  | Standard Name | Systematic Name         | Standard Name |
| YOR080W                                          | DIA2          | YAL055W                 | PEX22         |
| YLR386W                                          | VAC14         | YOR039W                 | CKB2          |
| YOR106W                                          | VAM3          | YMR231W                 | PEP5          |
| YHL011C                                          | PRS3          | YKL161C                 | YKL161C       |
| YJL154C                                          | VPS35         | YHR012W                 | VPS29         |
| YJL176C                                          | SWI3          | YML071C                 | COG8          |
| YBR171W                                          | SEC66         | YFR040W                 | SAP155        |
| YGL237C                                          | HAP2          | YLR233C                 | EST1          |
| YOR270C                                          | VPH1          | YDR261C                 | EXG2          |
| YMR026C                                          | PEX12         | YMR214W                 | SCJ1          |
| YLR381W                                          | CTF3          | YOL081W                 | IRA2          |
| YFR036W                                          | CDC26         | YDR318W                 | MCM21         |
| YMR116C                                          | ASC1          | YBR131W                 | CCZ1          |
| YER116C                                          | SLX8          | YKL048C                 | ELM1          |
| YLR192C                                          | HCR1          | YIL071C                 | PCI8          |
| YMR026C                                          | PEX12         | YNL087W                 | TCB2          |
| YLR176C                                          | RFX1          | YGR252W                 | GCN5          |
| YJR135C                                          | MCM22         | YDR144C                 | MKC7          |
| YMR242C                                          | RPL20A        | YGL246C                 | RAI1          |
| YNL094W                                          | APP1          | YJL004C                 | SYS1          |
| YLR102C                                          | APC9          | YMR199W                 | CLN1          |
| YIL008W                                          | URM1          | YHL002W                 | HSE1          |
| YOR112W                                          | CEX1          | YGL054C                 | ERV14         |
| YDR080W                                          | VPS41         | YLR396C                 | VPS33         |
| YGL151W                                          | NUT1          | YGL253W                 | HXK2          |
| YKL126W                                          | YPK1          | YLR320W                 | MMS22         |
| YLR018C                                          | POM34         | YJR059W                 | PTK2          |
| YFR010W                                          | UBP6          | YOR014W                 | RTS1          |
| YBR171W                                          | SEC66         | YDR155C                 | CPR1          |



| Predictions at threshold level 0.80 continued... |               |                         |               |
|--------------------------------------------------|---------------|-------------------------|---------------|
| Gene1 of predicted pair                          |               | Gene2 of predicted pair |               |
| Systematic Name                                  | Standard Name | Systematic Name         | Standard Name |
| YMR172W                                          | HOT1          | YGR019W                 | UGA1          |
| YOR270C                                          | VPH1          | YHR060W                 | VMA22         |
| YNL076W                                          | MKS1          | YER122C                 | GLO3          |
| YJL053W                                          | PEP8          | YDL006W                 | PTC1          |
| YEL065W                                          | SIT1          | YML071C                 | COG8          |
| YMR199W                                          | CLN1          | YDR363W-A               | SEM1          |
| YBL058W                                          | SHP1          | YMR026C                 | PEX12         |
| YOR076C                                          | SKI7          | YDL020C                 | RPN4          |
| YML103C                                          | NUP188        | YGL100W                 | SEH1          |
| YEL050C                                          | RML2          | YDR363W-A               | SEM1          |
| YDR137W                                          | RGP1          | YOR327C                 | SNC2          |
| YCL011C                                          | GBP2          | YHR167W                 | THP2          |
| YJL136C                                          | RPS21B        | YPL256C                 | CLN2          |
| YFL023W                                          | BUD27         | YJR084W                 | CSN12         |
| YMR016C                                          | SOK2          | YNL238W                 | KEX2          |
| YPL037C                                          | EGD1          | YOR043W                 | WHI2          |
| YPL001W                                          | HAT1          | YPR120C                 | CLB5          |
| YGR019W                                          | UGA1          | YLR234W                 | TOP3          |
| YBL067C                                          | UBP13         | YBL072C                 | RPS8A         |
| YER116C                                          | SLX8          | YDR261C                 | EXG2          |
| YOR112W                                          | CEX1          | YJR060W                 | CBF1          |
| YNL079C                                          | TPM1          | YHR108W                 | GGA2          |
| YGR261C                                          | APL6          | YOL018C                 | TLG2          |
| YKL032C                                          | IXR1          | YGL163C                 | RAD54         |
| YOR337W                                          | TEA1          | YJR056C                 | YJR056C       |
| YNL087W                                          | TCB2          | YBL025W                 | RRN10         |
| YOR127W                                          | RGA1          | YPL234C                 | TFP3          |
| YDL052C                                          | SLC1          | YMR152W                 | YIM1          |
| YLR135W                                          | SLX4          | YLR410W                 | VIP1          |

| Predictions at threshold level 0.80 continued... |               |                         |               |
|--------------------------------------------------|---------------|-------------------------|---------------|
| Gene1 of predicted pair                          |               | Gene2 of predicted pair |               |
| Systematic Name                                  | Standard Name | Systematic Name         | Standard Name |
| YDL127W                                          | PCL2          | YKL032C                 | IXR1          |
| YML016C                                          | PPZ1          | YDL185W                 | TFP1          |
| YDR379W                                          | RGA2          | YPL256C                 | CLN2          |
| YMR153W                                          | NUP53         | YER122C                 | GLO3          |
| YJR140C                                          | HIR3          | YDR137W                 | RGP1          |
| YBL058W                                          | SHP1          | YER044C                 | ERG28         |
| YLR381W                                          | CTF3          | YLR182W                 | SWI6          |
| YDR295C                                          | HDA2          | YLR131C                 | ACE2          |
| YOR066W                                          | MSA1          | YER162C                 | RAD4          |
| YBR171W                                          | SEC66         | YJR135C                 | MCM22         |
| YBR057C                                          | MUM2          | YER116C                 | SLX8          |
| YML115C                                          | VAN1          | YEL027W                 | CUP5          |
| YBL003C                                          | HTA2          | YBR111W-A               | SUS1          |
| YJR140C                                          | HIR3          | YOR368W                 | RAD17         |
| YDR245W                                          | MNN10         | YOR312C                 | RPL20B        |
| YMR167W                                          | MLH1          | YDR310C                 | SUM1          |
| YOR308C                                          | SNU66         | YMR038C                 | CCS1          |
| YCL067C                                          | HMLALPHA2     | YAL040C                 | CLN3          |
| YLR309C                                          | IMH1          | YPR032W                 | SRO7          |
| YIL034C                                          | CAP2          | YOR127W                 | RGA1          |
| YLR313C                                          | SPH1          | YCR086W                 | CSM1          |
| YFL023W                                          | BUD27         | YOR368W                 | RAD17         |
| YDR378C                                          | LSM6          | YIR005W                 | IST3          |
| YOR327C                                          | SNC2          | YMR017W                 | SPO20         |
| YDR254W                                          | CHL4          | YIL008W                 | URM1          |
| YLR360W                                          | VPS38         | YMR055C                 | BUB2          |
| YBR278W                                          | DPB3          | YPR120C                 | CLB5          |
| YJL172W                                          | CPS1          | YJR032W                 | CPR7          |
| YPL161C                                          | BEM4          | YPL213W                 | LEA1          |

| Predictions at threshold level 0.80 continued... |               |                         |               |
|--------------------------------------------------|---------------|-------------------------|---------------|
| Gene1 of predicted pair                          |               | Gene2 of predicted pair |               |
| Systematic Name                                  | Standard Name | Systematic Name         | Standard Name |
| YJR032W                                          | CPR7          | YLR093C                 | NYV1          |
| YMR216C                                          | SKY1          | YPR051W                 | MAK3          |
| YGL133W                                          | ITC1          | YDR379W                 | RGA2          |
| YNL248C                                          | RPA49         | YFR030W                 | MET10         |
| YDR129C                                          | SAC6          | YEL044W                 | IES6          |
| YOR290C                                          | SNF2          | YNL031C                 | HHT2          |
| YNL307C                                          | MCK1          | YGL163C                 | RAD54         |
| YLR085C                                          | ARP6          | YBR089C-A               | NHP6B         |
| YLR360W                                          | VPS38         | YOL018C                 | TLG2          |
| YML115C                                          | VAN1          | YDR261C                 | EXG2          |
| YPL240C                                          | HSP82         | YNL220W                 | ADE12         |
| YGR108W                                          | CLB1          | YLR410W                 | VIP1          |
| YMR109W                                          | MYO5          | YDL155W                 | CLB3          |
| YPR036W                                          | VMA13         | YMR152W                 | YIM1          |
| YDR477W                                          | SNF1          | YLR398C                 | SKI2          |
| YNR052C                                          | POP2          | YDR207C                 | UME6          |
| YDR254W                                          | CHL4          | YEL053C                 | MAK10         |
| YNL106C                                          | INP52         | YOL054W                 | PSH1          |
| YER179W                                          | DMC1          | YCL014W                 | BUD3          |
| YML117W                                          | NAB6          | YDL006W                 | PTC1          |
| YJL190C                                          | RPS22A        | YHL002W                 | HSE1          |
| YGL100W                                          | SEH1          | YNL076W                 | MKS1          |
| YPR084W                                          | YPR084W       | YPR032W                 | SRO7          |
| YLR315W                                          | NKP2          | YGL252C                 | RTG2          |
| YDR507C                                          | GIN4          | YML095C                 | RAD10         |
| YLR227C                                          | ADY4          | YOL091W                 | SPO21         |
| YPL161C                                          | BEM4          | YPL195W                 | APL5          |
| YHR156C                                          | LIN1          | YJR032W                 | CPR7          |
| YAL024C                                          | LTE1          | YMR214W                 | SCJ1          |

| Predictions at threshold level 0.80 continued... |               |                         |               |
|--------------------------------------------------|---------------|-------------------------|---------------|
| Gene1 of predicted pair                          |               | Gene2 of predicted pair |               |
| Systematic Name                                  | Standard Name | Systematic Name         | Standard Name |
| YPR046W                                          | MCM16         | YMR152W                 | YIM1          |
| YLR095C                                          | IOC2          | YPR030W                 | CSR2          |
| YDL154W                                          | MSH5          | YLR394W                 | CST9          |
| YPL024W                                          | RMI1          | YDR254W                 | CHL4          |
| YBL103C                                          | RTG3          | YEL060C                 | PRB1          |
| YDL184C                                          | RPL41A        | YNL058C                 | YNL058C       |
| YNL307C                                          | MCK1          | YNL225C                 | CNM67         |
| YLR360W                                          | VPS38         | YOR132W                 | VPS17         |
| YPL042C                                          | SSN3          | YPL248C                 | GAL4          |
| YDR448W                                          | ADA2          | YCL010C                 | SGF29         |
| YBL103C                                          | RTG3          | YDR207C                 | UME6          |
| YGR072W                                          | UPF3          | YPL037C                 | EGD1          |
| YNL004W                                          | HRB1          | YHR167W                 | THP2          |
| YOR132W                                          | VPS17         | YDR153C                 | ENT5          |
| YGR054W                                          | YGR054W       | YJL183W                 | MNN11         |
| YMR095C                                          | SNO1          | YKR099W                 | BAS1          |
| YOR112W                                          | CEX1          | YLR309C                 | IMH1          |
| YPR018W                                          | RLF2          | YBR107C                 | IML3          |
| YGR270W                                          | YTA7          | YOR141C                 | ARP8          |
| YKL073W                                          | LHS1          | YMR022W                 | UBC7          |
| YLR090W                                          | XDJ1          | YBR171W                 | SEC66         |
| YNL297C                                          | MON2          | YNL044W                 | YIP3          |
| YKL110C                                          | KTI12         | YOR141C                 | ARP8          |
| YFR036W                                          | CDC26         | YCR086W                 | CSM1          |
| YMR224C                                          | MRE11         | YOR290C                 | SNF2          |
| YDR156W                                          | RPA14         | YJR063W                 | RPA12         |
| YJR040W                                          | GEF1          | YHL020C                 | OPI1          |
| YLR254C                                          | NDL1          | YHR115C                 | DMA1          |
| YNL032W                                          | SIW14         | YLR441C                 | RPS1A         |

| Predictions at threshold level 0.80 continued... |               |                         |               |
|--------------------------------------------------|---------------|-------------------------|---------------|
| Gene1 of predicted pair                          |               | Gene2 of predicted pair |               |
| Systematic Name                                  | Standard Name | Systematic Name         | Standard Name |
| YFR010W                                          | UBP6          | YER162C                 | RAD4          |
| YHR156C                                          | LIN1          | YPL161C                 | BEM4          |
| YMR133W                                          | REC114        | YLR370C                 | ARC18         |
| YLR410W                                          | VIP1          | YIR005W                 | IST3          |
| YLR386W                                          | VAC14         | YML001W                 | YPT7          |
| YPL057C                                          | SUR1          | YER122C                 | GLO3          |
| YIL008W                                          | URM1          | YCR086W                 | CSM1          |
| YKR061W                                          | KTR2          | YNL107W                 | YAF9          |
| YOR127W                                          | RGA1          | YNR032W                 | PPG1          |
| YBL003C                                          | HTA2          | YGR252W                 | GCN5          |
| YJL183W                                          | MNN11         | YDR310C                 | SUM1          |
| YOR033C                                          | EXO1          | YPR046W                 | MCM16         |
| YKL048C                                          | ELM1          | YHR111W                 | UBA4          |
| YNL199C                                          | GCR2          | YBL079W                 | NUP170        |
| YPR040W                                          | TIP41         | YKR048C                 | NAP1          |
| YNL201C                                          | PSY2          | YKL110C                 | KTI12         |
| YMR284W                                          | YKU70         | YBR082C                 | UBC4          |
| YDR293C                                          | SSD1          | YLR234W                 | TOP3          |
| YFR036W                                          | CDC26         | YGR188C                 | BUB1          |
| YOR127W                                          | RGA1          | YOL067C                 | RTG1          |
| YBR194W                                          | SOY1          | YDR440W                 | DOT1          |
| YOR290C                                          | SNF2          | YBR036C                 | CSG2          |
| YOR358W                                          | HAP5          | YLR233C                 | EST1          |
| YKL126W                                          | YPK1          | YDL077C                 | VAM6          |
| YML115C                                          | VAN1          | YOR290C                 | SNF2          |
| YNL307C                                          | MCK1          | YOR141C                 | ARP8          |
| YGR249W                                          | MGA1          | YER040W                 | GLN3          |
| YIR005W                                          | IST3          | YDR440W                 | DOT1          |
| YDR245W                                          | MNN10         | YKL213C                 | DOA1          |

| Predictions at threshold level 0.80 continued... |               |                         |               |
|--------------------------------------------------|---------------|-------------------------|---------------|
| Gene1 of predicted pair                          |               | Gene2 of predicted pair |               |
| Systematic Name                                  | Standard Name | Systematic Name         | Standard Name |
| YLR109W                                          | AHP1          | YPR167C                 | MET16         |
| YDL059C                                          | RAD59         | YDR207C                 | UME6          |
| YKR061W                                          | KTR2          | YKL110C                 | KTI12         |
| YKL139W                                          | CTK1          | YLR350W                 | ORM2          |
| YDR261C                                          | EXG2          | YEL060C                 | PRB1          |
| YBL003C                                          | HTA2          | YBR010W                 | HHT1          |
| YGR241C                                          | YAP1802       | YDR484W                 | VPS52         |
| YOR069W                                          | VPS5          | YOR109W                 | INP53         |
| YNL106C                                          | INP52         | YHR077C                 | NMD2          |
| YOR083W                                          | WHI5          | YGL025C                 | PGD1          |
| YNL215W                                          | IES2          | YHR178W                 | STB5          |
| YGL087C                                          | MMS2          | YKL101W                 | HSL1          |
| YDR137W                                          | RGP1          | YMR230W                 | RPS10B        |
| YMR095C                                          | SNO1          | YNL076W                 | MKS1          |
| YPL037C                                          | EGD1          | YBR280C                 | SAF1          |
| YNL288W                                          | CAF40         | YAR014C                 | BUD14         |
| YGR041W                                          | BUD9          | YLR353W                 | BUD8          |
| YPR052C                                          | NHP6A         | YML062C                 | MFT1          |
| YDR108W                                          | GSG1          | YLR309C                 | IMH1          |
| YPR131C                                          | NAT3          | YJL006C                 | CTK2          |
| YIL076W                                          | SEC28         | YDR440W                 | DOT1          |

## Predicted pairs at a threshold level of 0.85

| Predictions at threshold level 0.85 |               |                         |               |
|-------------------------------------|---------------|-------------------------|---------------|
| Gene1 of predicted pair             |               | Gene2 of predicted pair |               |
| Systematic Name                     | Standard Name | Systematic Name         | Standard Name |
| YGL025C                             | PGD1          | YJR032W                 | CPR7          |
| YNL199C                             | GCR2          | YGR059W                 | SPR3          |
| YHR056C                             | RSC30         | YPR119W                 | CLB2          |
| YEL027W                             | CUP5          | YHR039C-A               | VMA10         |
| YMR080C                             | NAM7          | YHR077C                 | NMD2          |
| YDL161W                             | ENT1          | YNR006W                 | VPS27         |
| YHR108W                             | GGA2          | YDL192W                 | ARF1          |
| YPL178W                             | CBC2          | YKL068W                 | NUP100        |
| YBR042C                             | CST26         | YDR137W                 | RGP1          |
| YJR063W                             | RPA12         | YOR064C                 | YNG1          |
| YPL105C                             | YPL105C       | YOR327C                 | SNC2          |
| YDR012W                             | RPL4B         | YOR078W                 | BUD21         |
| YOL018C                             | TLG2          | YOR036W                 | PEP12         |
| YDR320C                             | SWA2          | YCR066W                 | RAD18         |
| YNL238W                             | KEX2          | YHR108W                 | GGA2          |
| YBR017C                             | KAP104        | YKL057C                 | NUP120        |
| YCL001W                             | RER1          | YHR012W                 | VPS29         |
| YDL065C                             | PEX19         | YGL153W                 | PEX14         |
| YJR032W                             | CPR7          | YOL018C                 | TLG2          |
| YKR099W                             | BAS1          | YMR311C                 | GLC8          |
| YML099C                             | ARG81         | YDR207C                 | UME6          |
| YDR225W                             | HTA1          | YBL003C                 | HTA2          |
| YHR119W                             | SET1          | YBR175W                 | SWD3          |
| YER115C                             | SPR6          | YMR273C                 | ZDS1          |
| YDR004W                             | RAD57         | YFR036W                 | CDC26         |
| YLR079W                             | SIC1          | YOR195W                 | SLK19         |
| YGR184C                             | UBR1          | YDL013W                 | SLX5          |
| YDR395W                             | SXM1          | YKL068W                 | NUP100        |

| Predictions at threshold level 0.85 continued... |               |                         |               |
|--------------------------------------------------|---------------|-------------------------|---------------|
| Gene1 of predicted pair                          |               | Gene2 of predicted pair |               |
| Systematic Name                                  | Standard Name | Systematic Name         | Standard Name |
| YER114C                                          | BOI2          | YHR061C                 | GIC1          |
| YLR079W                                          | SIC1          | YMR199W                 | CLN1          |
| YPL046C                                          | ELC1          | YNL230C                 | ELA1          |
| YLR423C                                          | ATG17         | YPR119W                 | CLB2          |
| YHR052W                                          | CIC1          | YLR325C                 | RPL38         |
| YLR381W                                          | CTF3          | YJR060W                 | CBF1          |
| YBR164C                                          | ARL1          | YEL022W                 | GEA2          |
| YOR290C                                          | SNF2          | YKL109W                 | HAP4          |
| YBL051C                                          | PIN4          | YLR447C                 | VMA6          |
| YBR030W                                          | YBR030W       | YHR039C-A               | VMA10         |
| YOR039W                                          | CKB2          | YGR252W                 | GCN5          |
| YPL147W                                          | PXA1          | YPL145C                 | KES1          |
| YOR094W                                          | ARF3          | YCL034W                 | LSB5          |
| YPR018W                                          | RLF2          | YDR181C                 | SAS4          |
| YPL022W                                          | RAD1          | YML095C                 | RAD10         |
| YGL200C                                          | EMP24         | YML012W                 | ERV25         |
| YOR140W                                          | SFL1          | YDR207C                 | UME6          |
| YPR018W                                          | RLF2          | YOR033C                 | EXO1          |
| YDR101C                                          | ARX1          | YBR267W                 | REI1          |
| YLR043C                                          | TRX1          | YER042W                 | MXR1          |
| YNL307C                                          | MCK1          | YGR270W                 | YTA7          |
| YPL024W                                          | RMI1          | YML115C                 | VAN1          |
| YDR254W                                          | CHL4          | YJR060W                 | CBF1          |
| YKR048C                                          | NAP1          | YBR010W                 | HHT1          |
| YER122C                                          | GLO3          | YKR030W                 | GMH1          |
| YLR386W                                          | VAC14         | YEL060C                 | PRB1          |
| YBL008W                                          | HIR1          | YJL176C                 | SWI3          |
| YDL020C                                          | RPN4          | YNL206C                 | RTT106        |
| YNL180C                                          | RHO5          | YPL240C                 | HSP82         |



| Predictions at threshold level 0.85 continued... |               |                         |               |
|--------------------------------------------------|---------------|-------------------------|---------------|
| Gene1 of predicted pair                          |               | Gene2 of predicted pair |               |
| Systematic Name                                  | Standard Name | Systematic Name         | Standard Name |
| YPR029C                                          | APL4          | YDR153C                 | ENT5          |
| YLR234W                                          | TOP3          | YGL163C                 | RAD54         |
| YKL139W                                          | CTK1          | YPL022W                 | RAD1          |
| YIL076W                                          | SEC28         | YOR043W                 | WHI2          |
| YAL030W                                          | SNC1          | YPR032W                 | SRO7          |
| YPL042C                                          | SSN3          | YOL051W                 | GAL11         |
| YPL105C                                          | YPL105C       | YJR060W                 | CBF1          |
| YBR264C                                          | YPT10         | YNL044W                 | YIP3          |
| YPL046C                                          | ELC1          | YBR114W                 | RAD16         |
| YPL129W                                          | TAF14         | YBR289W                 | SNF5          |
| YGL200C                                          | EMP24         | YFL048C                 | EMP47         |
| YGL094C                                          | PAN2          | YKL114C                 | APN1          |
| YMR054W                                          | STV1          | YEL051W                 | VMA8          |
| YOL044W                                          | PEX15         | YGL153W                 | PEX14         |
| YKR014C                                          | YPT52         | YEL036C                 | ANP1          |
| YBR010W                                          | HHT1          | YNL030W                 | HHF2          |
| YBR274W                                          | CHK1          | YNL234W                 | YNL234W       |
| YLR093C                                          | NYV1          | YOR327C                 | SNC2          |
| YKR035W-A                                        | DID2          | YLR452C                 | SST2          |
| YNL307C                                          | MCK1          | YOR035C                 | SHE4          |
| YDL184C                                          | RPL41A        | YOR035C                 | SHE4          |
| YGL033W                                          | HOP2          | YER139C                 | YER139C       |
| YDR123C                                          | INO2          | YHL020C                 | OPI1          |
| YOR096W                                          | RPS7A         | YOR078W                 | BUD21         |
| YBL008W                                          | HIR1          | YHL025W                 | SNF6          |
| YDR137W                                          | RGP1          | YER044C                 | ERG28         |
| YDR245W                                          | MNN10         | YHR108W                 | GGA2          |
| YOL086C                                          | ADH1          | YPR119W                 | CLB2          |
| YIL034C                                          | CAP2          | YLR429W                 | CRN1          |

| Predictions at threshold level 0.85 continued... |               |                         |               |
|--------------------------------------------------|---------------|-------------------------|---------------|
| Gene1 of predicted pair                          |               | Gene2 of predicted pair |               |
| Systematic Name                                  | Standard Name | Systematic Name         | Standard Name |
| YGL223C                                          | COG1          | YJL029C                 | VPS53         |
| YDR277C                                          | MTH1          | YPR119W                 | CLB2          |
| YPL161C                                          | BEM4          | YDR358W                 | GGA1          |
| YML115C                                          | VAN1          | YPL195W                 | APL5          |
| YKR061W                                          | KTR2          | YML112W                 | CTK3          |
| YMR016C                                          | SOK2          | YML001W                 | YPT7          |
| YEL065W                                          | SIT1          | YBR200W                 | BEM1          |
| YDR448W                                          | ADA2          | YOL051W                 | GAL11         |
| YML016C                                          | PPZ1          | YJL124C                 | LSM1          |
| YPR189W                                          | SKI3          | YLR398C                 | SKI2          |
| YIL076W                                          | SEC28         | YBR217W                 | ATG12         |
| YBR089C-A                                        | NHP6B         | YPL248C                 | GAL4          |
| YLR386W                                          | VAC14         | YLR254C                 | NDL1          |
| YJL006C                                          | CTK2          | YML112W                 | CTK3          |
| YIR005W                                          | IST3          | YPL018W                 | CTF19         |
| YNL243W                                          | SLA2          | YCR009C                 | RVS161        |
| YIL076W                                          | SEC28         | YOR308C                 | SNU66         |
| YDL020C                                          | RPN4          | YLR024C                 | UBR2          |
| YNL201C                                          | PSY2          | YBR200W                 | BEM1          |
| YCL037C                                          | SRO9          | YEL013W                 | VAC8          |
| YIL076W                                          | SEC28         | YOR080W                 | DIA2          |
| YJL210W                                          | PEX2          | YLR191W                 | PEX13         |
| YLL039C                                          | UBI4          | YHL002W                 | HSE1          |
| YPL203W                                          | TPK2          | YIL033C                 | BCY1          |
| YNL248C                                          | RPA49         | YDR335W                 | MSN5          |
| YLR398C                                          | SKI2          | YBR280C                 | SAF1          |
| YDR261C                                          | EXG2          | YBL025W                 | RRN10         |
| YNL215W                                          | IES2          | YLR399C                 | BDF1          |
| YMR231W                                          | PEP5          | YGL095C                 | VPS45         |

| Predictions at threshold level 0.85 continued... |               |                         |               |
|--------------------------------------------------|---------------|-------------------------|---------------|
| Gene1 of predicted pair                          |               | Gene2 of predicted pair |               |
| Systematic Name                                  | Standard Name | Systematic Name         | Standard Name |
| YNL297C                                          | MON2          | YDR440W                 | DOT1          |
| YPR029C                                          | APL4          | YKL135C                 | APL2          |
| YLR273C                                          | PIG1          | YLR258W                 | GSY2          |
| YNL031C                                          | HHT2          | YMR273C                 | ZDS1          |
| YBR065C                                          | ECM2          | YGR006W                 | PRP18         |
| YDR363W-A                                        | SEM1          | YFR036W                 | CDC26         |
| YDR448W                                          | ADA2          | YDR216W                 | ADR1          |
| YDR293C                                          | SSD1          | YIL038C                 | NOT3          |
| YDR129C                                          | SAC6          | YER122C                 | GLO3          |
| YKR001C                                          | VPS1          | YKR030W                 | GMH1          |
| YOR001W                                          | RRP6          | YDR289C                 | RTT103        |
| YPL024W                                          | RMI1          | YLR386W                 | VAC14         |
| YDR080W                                          | VPS41         | YML071C                 | COG8          |
| YBR270C                                          | BIT2          | YIL105C                 | SLM1          |
| YHR200W                                          | RPN10         | YPR046W                 | MCM16         |
| YJL006C                                          | CTK2          | YGL003C                 | CDH1          |
| YKR059W                                          | TIF1          | YML016C                 | PPZ1          |
| YPL024W                                          | RMI1          | YOR035C                 | SHE4          |
| YBR171W                                          | SEC66         | YPL050C                 | MNN9          |
| YPR049C                                          | ATG11         | YPR119W                 | CLB2          |
| YPL161C                                          | BEM4          | YLR371W                 | ROM2          |
| YDR293C                                          | SSD1          | YOR109W                 | INP53         |
| YDR192C                                          | NUP42         | YER110C                 | KAP123        |
| YLR452C                                          | SST2          | YML001W                 | YPT7          |
| YER044C                                          | ERG28         | YBL025W                 | RRN10         |
| YML007W                                          | YAP1          | YER110C                 | KAP123        |
| YGL212W                                          | VAM7          | YNL051W                 | COG5          |
| YMR224C                                          | MRE11         | YJR035W                 | RAD26         |
| YLR381W                                          | CTF3          | YGL115W                 | SNF4          |

| Predictions at threshold level 0.85 continued... |               |                         |               |
|--------------------------------------------------|---------------|-------------------------|---------------|
| Gene1 of predicted pair                          |               | Gene2 of predicted pair |               |
| Systematic Name                                  | Standard Name | Systematic Name         | Standard Name |
| YJL210W                                          | PEX2          | YDR142C                 | PEX7          |
| YOR279C                                          | RFM1          | YDR310C                 | SUM1          |
| YLR093C                                          | NYV1          | YPL195W                 | APL5          |
| YLR234W                                          | TOP3          | YOL090W                 | MSH2          |
| YHR171W                                          | ATG7          | YNL223W                 | ATG4          |
| YLR234W                                          | TOP3          | YOR023C                 | AHC1          |
| YGL178W                                          | MPT5          | YLR452C                 | SST2          |
| YDR176W                                          | NGG1          | YGL252C                 | RTG2          |
| YDR202C                                          | RAV2          | YJR040W                 | GEF1          |
| YLR135W                                          | SLX4          | YLR313C                 | SPH1          |
| YJL151C                                          | SNA3          | YPL246C                 | RBD2          |
| YML012W                                          | ERV25         | YFL048C                 | EMP47         |
| YGR275W                                          | RTT102        | YDR073W                 | SNF11         |
| YJL083W                                          | TAX4          | YIL002C                 | INP51         |
| YKL139W                                          | CTK1          | YDR378C                 | LSM6          |
| YLR191W                                          | PEX13         | YDL065C                 | PEX19         |
| YKL114C                                          | APN1          | YLR032W                 | RAD5          |
| YMR192W                                          | GYL1          | YNL094W                 | APP1          |
| YBR173C                                          | UMP1          | YBR171W                 | SEC66         |
| YLR396C                                          | VPS33         | YPL195W                 | APL5          |
| YML001W                                          | YPT7          | YGL003C                 | CDH1          |
| YDR192C                                          | NUP42         | YBL047C                 | EDE1          |
| YDR123C                                          | INO2          | YOL108C                 | INO4          |
| YKL006W                                          | RPL14A        | YBL047C                 | EDE1          |
| YPL057C                                          | SUR1          | YDL077C                 | VAM6          |
| YIL140W                                          | AXL2          | YCR038C                 | BUD5          |
| YML016C                                          | PPZ1          | YGR252W                 | GCN5          |
| YDR225W                                          | HTA1          | YOR141C                 | ARP8          |
| YHR171W                                          | ATG7          | YNR049C                 | MSO1          |

| Predictions at threshold level 0.85 continued... |               |                         |               |
|--------------------------------------------------|---------------|-------------------------|---------------|
| Gene1 of predicted pair                          |               | Gene2 of predicted pair |               |
| Systematic Name                                  | Standard Name | Systematic Name         | Standard Name |
| YJL095W                                          | BCK1          | YLR370C                 | ARC18         |
| YHR108W                                          | GGA2          | YDL137W                 | ARF2          |
| YDL116W                                          | NUP84         | YGR270W                 | YTA7          |
| YJL183W                                          | MNN11         | YHL002W                 | HSE1          |
| YGR133W                                          | PEX4          | YHR013C                 | ARD1          |
| YGR261C                                          | APL6          | YAL002W                 | VPS8          |
| YCR020C-A                                        | MAK31         | YGR261C                 | APL6          |
| YHR200W                                          | RPN10         | YLR421C                 | RPN13         |
| YPL140C                                          | MKK2          | YOR208W                 | PTP2          |
| YIL076W                                          | SEC28         | YDR261C                 | EXG2          |
| YLR227C                                          | ADY4          | YNL225C                 | CNM67         |
| YJR132W                                          | NMD5          | YPR119W                 | CLB2          |
| YMR004W                                          | MVP1          | YAL002W                 | VPS8          |
| YOR327C                                          | SNC2          | YER122C                 | GLO3          |
| YFR021W                                          | ATG18         | YJR025C                 | BNA1          |
| YIL076W                                          | SEC28         | YEL013W                 | VAC8          |
| YLR064W                                          | YLR064W       | YMR253C                 | YMR253C       |
| YNL297C                                          | MON2          | YDL192W                 | ARF1          |
| YBL102W                                          | SFT2          | YLR309C                 | IMH1          |
| YDL080C                                          | THI3          | YER139C                 | YER139C       |
| YIL076W                                          | SEC28         | YCL001W                 | RER1          |
| YDR477W                                          | SNF1          | YPR119W                 | CLB2          |
| YIR025W                                          | MND2          | YDR260C                 | SWM1          |
| YBR041W                                          | FAT1          | YER044C                 | ERG28         |
| YMR055C                                          | BUB2          | YNL225C                 | CNM67         |
| YKL025C                                          | PAN3          | YLR234W                 | TOP3          |
| YDR358W                                          | GGA1          | YDL192W                 | ARF1          |
| YBR264C                                          | YPT10         | YER074W-A               | YOS1          |
| YBR217W                                          | ATG12         | YER044C                 | ERG28         |

| Predictions at threshold level 0.85 continued... |               |                         |               |
|--------------------------------------------------|---------------|-------------------------|---------------|
| Gene1 of predicted pair                          |               | Gene2 of predicted pair |               |
| Systematic Name                                  | Standard Name | Systematic Name         | Standard Name |
| YKL010C                                          | UFD4          | YGR135W                 | PRE9          |
| YOR023C                                          | AHC1          | YGR252W                 | GCN5          |
| YER129W                                          | SAK1          | YPL256C                 | CLN2          |
| YPR131C                                          | NAT3          | YPL018W                 | CTF19         |
| YFR010W                                          | UBP6          | YFR036W                 | CDC26         |
| YKR101W                                          | SIR1          | YBR009C                 | HHF1          |
| YER107C                                          | GLE2          | YML103C                 | NUP188        |
| YBR126C                                          | TPS1          | YDL192W                 | ARF1          |
| YDR448W                                          | ADA2          | YPL248C                 | GAL4          |
| YJL004C                                          | SYS1          | YHR016C                 | YSC84         |
| YBR131W                                          | CCZ1          | YMR231W                 | PEP5          |
| YGL178W                                          | MPT5          | YBR200W                 | BEM1          |
| YDL065C                                          | PEX19         | YGR077C                 | PEX8          |
| YJL095W                                          | BCK1          | YNL090W                 | RHO2          |
| YPR189W                                          | SKI3          | YPR119W                 | CLB2          |
| YML071C                                          | COG8          | YEL042W                 | GDA1          |
| YMR055C                                          | BUB2          | YJR135C                 | MCM22         |
| YIL105C                                          | SLM1          | YJL058C                 | BIT61         |
| YIL159W                                          | BNR1          | YBL051C                 | PIN4          |
| YLR360W                                          | VPS38         | YOR109W                 | INP53         |
| YOL145C                                          | CTR9          | YGL025C                 | PGD1          |
| YPL246C                                          | RBD2          | YKR030W                 | GMH1          |
| YMR095C                                          | SNO1          | YDR358W                 | GGA1          |
| YPL246C                                          | RBD2          | YOR284W                 | HUA2          |
| YPR119W                                          | CLB2          | YLR032W                 | RAD5          |
| YGL016W                                          | KAP122        | YKL068W                 | NUP100        |
| YER162C                                          | RAD4          | YDR358W                 | GGA1          |
| YDL002C                                          | NHP10         | YHR167W                 | THP2          |
| YPL152W                                          | RRD2          | YPR119W                 | CLB2          |

| Predictions at threshold level 0.85 continued... |               |                         |               |
|--------------------------------------------------|---------------|-------------------------|---------------|
| Gene1 of predicted pair                          |               | Gene2 of predicted pair |               |
| Systematic Name                                  | Standard Name | Systematic Name         | Standard Name |
| YFR031C-A                                        | RPL2A         | YER120W                 | SCS2          |
| YCR088W                                          | ABP1          | YOR284W                 | HUA2          |
| YPL001W                                          | HAT1          | YDL002C                 | NHP10         |
| YGL019W                                          | CKB1          | YPR119W                 | CLB2          |
| YHR039C-A                                        | VMA10         | YKL080W                 | VMA5          |
| YLL039C                                          | UBI4          | YDR477W                 | SNF1          |
| YGL066W                                          | SGF73         | YBR107C                 | IML3          |
| YDR225W                                          | HTA1          | YLR399C                 | BDF1          |
| YPR171W                                          | BSP1          | YHR016C                 | YSC84         |
| YGL115W                                          | SNF4          | YJR135C                 | MCM22         |
| YMR167W                                          | MLH1          | YNL082W                 | PMS1          |
| YGL208W                                          | SIP2          | YGL115W                 | SNF4          |
| YMR139W                                          | RIM11         | YJR094C                 | IME1          |
| YGR261C                                          | APL6          | YGL212W                 | VAM7          |
| YHR103W                                          | SBE22         | YFR021W                 | ATG18         |
| YGL208W                                          | SIP2          | YDR028C                 | REG1          |
| YLR234W                                          | TOP3          | YHR178W                 | STB5          |
| YHR013C                                          | ARD1          | YKL041W                 | VPS24         |
| YPR018W                                          | RLF2          | YML102W                 | CAC2          |
| YLR018C                                          | POM34         | YER110C                 | KAP123        |
| YLR337C                                          | VRP1          | YLR370C                 | ARC18         |
| YGL178W                                          | MPT5          | YLR182W                 | SWI6          |
| YDR225W                                          | HTA1          | YBL002W                 | HTB2          |
| YLR083C                                          | EMP70         | YGR020C                 | VMA7          |
| YHR200W                                          | RPN10         | YGR135W                 | PRE9          |
| YIL159W                                          | BNR1          | YJL095W                 | BCK1          |
| YDR379W                                          | RGA2          | YGR152C                 | RSR1          |
| YER087C-B                                        | SBH1          | YOR085W                 | OST3          |
| YPL049C                                          | DIG1          | YHR084W                 | STE12         |

| Predictions at threshold level 0.85 continued... |               |                         |               |
|--------------------------------------------------|---------------|-------------------------|---------------|
| Gene1 of predicted pair                          |               | Gene2 of predicted pair |               |
| Systematic Name                                  | Standard Name | Systematic Name         | Standard Name |
| YNL253W                                          | TEX1          | YCL011C                 | GBP2          |
| YJL154C                                          | VPS35         | YNL238W                 | KEX2          |
| YKR020W                                          | VPS51         | YDR309C                 | GIC2          |
| YDR137W                                          | RGP1          | YER139C                 | YER139C       |
| YER096W                                          | SHC1          | YPL161C                 | BEM4          |
| YBR030W                                          | YBR030W       | YML071C                 | COG8          |
| YAL024C                                          | LTE1          | YMR055C                 | BUB2          |
| YMR179W                                          | SPT21         | YML016C                 | PPZ1          |
| YPL057C                                          | SUR1          | YGL124C                 | MON1          |
| YNR052C                                          | POP2          | YJL124C                 | LSM1          |
| YBR200W                                          | BEM1          | YDR183W                 | PLP1          |
| YGR270W                                          | YTA7          | YJL006C                 | CTK2          |
| YDR254W                                          | CHL4          | YJL183W                 | MNN11         |
| YGL223C                                          | COG1          | YDL192W                 | ARF1          |
| YER044C                                          | ERG28         | YJL183W                 | MNN11         |
| YMR224C                                          | MRE11         | YIR002C                 | MPH1          |
| YDR265W                                          | PEX10         | YNL214W                 | PEX17         |
| YML007W                                          | YAP1          | YGL208W                 | SIP2          |
| YDR137W                                          | RGP1          | YEL042W                 | GDA1          |
| YDR129C                                          | SAC6          | YBL101C                 | ECM21         |
| YLR018C                                          | POM34         | YMR153W                 | NUP53         |
| YCR088W                                          | ABP1          | YKR001C                 | VPS1          |
| YDL127W                                          | PCL2          | YFR034C                 | PHO4          |
| YGR268C                                          | HUA1          | YHR016C                 | YSC84         |
| YNL139C                                          | RLR1          | YBR111W-A               | SUS1          |
| YGL212W                                          | VAM7          | YDR261C                 | EXG2          |
| YML115C                                          | VAN1          | YNL238W                 | KEX2          |
| YPR018W                                          | RLF2          | YDL155W                 | CLB3          |
| YDR146C                                          | SWI5          | YHR108W                 | GGA2          |



| Predictions at threshold level 0.85 continued... |               |                         |               |
|--------------------------------------------------|---------------|-------------------------|---------------|
| Gene1 of predicted pair                          |               | Gene2 of predicted pair |               |
| Systematic Name                                  | Standard Name | Systematic Name         | Standard Name |
| YNL044W                                          | YIP3          | YNL293W                 | MSB3          |
| YJR032W                                          | CPR7          | YPR119W                 | CLB2          |
| YEL013W                                          | VAC8          | YHR167W                 | THP2          |
| YLR234W                                          | TOP3          | YPL161C                 | BEM4          |
| YDR254W                                          | CHL4          | YHR200W                 | RPN10         |
| YPL042C                                          | SSN3          | YPR072W                 | NOT5          |
| YGR184C                                          | UBR1          | YGL163C                 | RAD54         |
| YER144C                                          | UBP5          | YER162C                 | RAD4          |
| YBR111W-A                                        | SUS1          | YDR216W                 | ADR1          |
| YBR200W                                          | BEM1          | YMR179W                 | SPT21         |
| YOR332W                                          | VMA4          | YJR033C                 | RAV1          |
| YBR107C                                          | IML3          | YJL183W                 | MNN11         |
| YFR036W                                          | CDC26         | YPR119W                 | CLB2          |
| YBR200W                                          | BEM1          | YHR200W                 | RPN10         |
| YDR137W                                          | RGP1          | YOR043W                 | WHI2          |
| YNL041C                                          | COG6          | YNL238W                 | KEX2          |
| YCL032W                                          | STE50         | YDR309C                 | GIC2          |
| YDL002C                                          | NHP10         | YNL107W                 | YAF9          |
| YPL001W                                          | HAT1          | YOR368W                 | RAD17         |
| YPL129W                                          | TAF14         | YMR127C                 | SAS2          |
| YDR080W                                          | VPS41         | YPL195W                 | APL5          |
| YPL001W                                          | HAT1          | YBR009C                 | HHF1          |
| YOR014W                                          | RTS1          | YPR119W                 | CLB2          |
| YLR102C                                          | APC9          | YHR200W                 | RPN10         |
| YDR293C                                          | SSD1          | YGR261C                 | APL6          |
| YJR040W                                          | GEF1          | YKR020W                 | VPS51         |
| YGL054C                                          | ERV14         | YOR327C                 | SNC2          |
| YDL161W                                          | ENT1          | YDR323C                 | PEP7          |
| YLR240W                                          | VPS34         | YPL120W                 | VPS30         |

| Predictions at threshold level 0.85 continued... |               |                         |               |
|--------------------------------------------------|---------------|-------------------------|---------------|
| Gene1 of predicted pair                          |               | Gene2 of predicted pair |               |
| Systematic Name                                  | Standard Name | Systematic Name         | Standard Name |
| YML115C                                          | VAN1          | YEL036C                 | ANP1          |
| YBR228W                                          | SLX1          | YGL031C                 | RPL24A        |
| YJL172W                                          | CPS1          | YDR358W                 | GGA1          |
| YOR080W                                          | DIA2          | YOR308C                 | SNU66         |
| YDL042C                                          | SIR2          | YBR009C                 | HHF1          |
| YLR386W                                          | VAC14         | YML095C                 | RAD10         |
| YIR009W                                          | MSL1          | YPR101W                 | SNT309        |
| YBR278W                                          | DPB3          | YOR304W                 | ISW2          |
| YJL004C                                          | SYS1          | YKR030W                 | GMH1          |
| YGL237C                                          | HAP2          | YAL002W                 | VPS8          |
| YLR288C                                          | MEC3          | YMR199W                 | CLN1          |
| YDR260C                                          | SWM1          | YDR254W                 | CHL4          |
| YDL020C                                          | RPN4          | YPR046W                 | MCM16         |
| YIL159W                                          | BNR1          | YKR048C                 | NAP1          |
| YLR216C                                          | CPR6          | YDR293C                 | SSD1          |
| YDL020C                                          | RPN4          | YDR207C                 | UME6          |
| YMR133W                                          | REC114        | YJL183W                 | MNN11         |
| YNL243W                                          | SLA2          | YJL187C                 | SWE1          |
| YMR091C                                          | NPL6          | YLL026W                 | HSP104        |
| YPR036W                                          | VMA13         | YPR119W                 | CLB2          |
| YGL060W                                          | YBP2          | YKL114C                 | APN1          |
| YJL172W                                          | CPS1          | YMR311C                 | GLC8          |
| YLR216C                                          | CPR6          | YER114C                 | BOI2          |
| YLR093C                                          | NYV1          | YJL183W                 | MNN11         |
| YDR254W                                          | CHL4          | YPL018W                 | CTF19         |
| YEL009C                                          | GCN4          | YDR146C                 | SWI5          |
| YJL124C                                          | LSM1          | YPL220W                 | RPL1A         |
| YDL052C                                          | SLC1          | YBR041W                 | FAT1          |
| YNL307C                                          | MCK1          | YLR254C                 | NDL1          |

| Predictions at threshold level 0.85 continued... |               |                         |               |
|--------------------------------------------------|---------------|-------------------------|---------------|
| Gene1 of predicted pair                          |               | Gene2 of predicted pair |               |
| Systematic Name                                  | Standard Name | Systematic Name         | Standard Name |
| YBR274W                                          | CHK1          | YJL138C                 | TIF2          |
| YHR119W                                          | SET1          | YLR015W                 | BRE2          |
| YER129W                                          | SAK1          | YDR028C                 | REG1          |
| YLR386W                                          | VAC14         | YGL237C                 | HAP2          |
| YPR046W                                          | MCM16         | YDR183W                 | PLP1          |
| YPL022W                                          | RAD1          | YPR119W                 | CLB2          |
| YIL076W                                          | SEC28         | YOR106W                 | VAM3          |
| YHL031C                                          | GOS1          | YEL013W                 | VAC8          |
| YOR304W                                          | ISW2          | YMR042W                 | ARG80         |
| YCR084C                                          | TUP1          | YBR009C                 | HHF1          |
| YDR223W                                          | CRF1          | YJL141C                 | YAK1          |
| YKL048C                                          | ELM1          | YPR120C                 | CLB5          |
| YHR039C-A                                        | VMA10         | YER120W                 | SCS2          |
| YER110C                                          | KAP123        | YNL031C                 | HHT2          |
| YKR082W                                          | NUP133        | YER105C                 | NUP157        |
| YDR477W                                          | SNF1          | YDR422C                 | SIP1          |
| YCL063W                                          | VAC17         | YFR021W                 | ATG18         |
| YLR043C                                          | TRX1          | YGL212W                 | VAM7          |
| YPL256C                                          | CLN2          | YPR119W                 | CLB2          |
| YLR150W                                          | STM1          | YGL246C                 | RAI1          |
| YJL154C                                          | VPS35         | YJL053W                 | PEP8          |
| YDR080W                                          | VPS41         | YGL223C                 | COG1          |
| YMR224C                                          | MRE11         | YDL013W                 | SLX5          |
| YJL183W                                          | MNN11         | YOR327C                 | SNC2          |
| YKR001C                                          | VPS1          | YPL195W                 | APL5          |
| YKL129C                                          | MYO3          | YLR370C                 | ARC18         |
| YPL234C                                          | TFP3          | YJR033C                 | RAV1          |
| YPR018W                                          | RLF2          | YMR199W                 | CLN1          |
| YDR146C                                          | SWI5          | YBR200W                 | BEM1          |

| Predictions at threshold level 0.85 continued... |               |                         |               |
|--------------------------------------------------|---------------|-------------------------|---------------|
| Gene1 of predicted pair                          |               | Gene2 of predicted pair |               |
| Systematic Name                                  | Standard Name | Systematic Name         | Standard Name |
| YBR127C                                          | VMA2          | YPL234C                 | TFP3          |
| YHR200W                                          | RPN10         | YNL107W                 | YAF9          |
| YOR106W                                          | VAM3          | YLR396C                 | VPS33         |
| YHR012W                                          | VPS29         | YKL119C                 | VPH2          |
| YDR260C                                          | SWM1          | YGL003C                 | CDH1          |
| YLR079W                                          | SIC1          | YDR171W                 | HSP42         |
| YDR225W                                          | HTA1          | YBR010W                 | HHT1          |
| YNL243W                                          | SLA2          | YNL271C                 | BNI1          |
| YDL160C                                          | DHH1          | YNL147W                 | LSM7          |
| YPL129W                                          | TAF14         | YBR112C                 | CYC8          |
| YHL031C                                          | GOS1          | YDL077C                 | VAM6          |
| YDR225W                                          | HTA1          | YBR289W                 | SNF5          |
| YER144C                                          | UBP5          | YML001W                 | YPT7          |
| YHR111W                                          | UBA4          | YIL008W                 | URM1          |
| YML058W                                          | SML1          | YIL066C                 | RNR3          |
| YHR167W                                          | THP2          | YAL002W                 | VPS8          |
| YOR001W                                          | RRP6          | YER041W                 | YEN1          |
| YDL160C                                          | DHH1          | YDR378C                 | LSM6          |
| YHR079C                                          | IRE1          | YFL031W                 | HAC1          |
| YMR026C                                          | PEX12         | YGR077C                 | PEX8          |
| YDR244W                                          | PEX5          | YAL055W                 | PEX22         |
| YOR106W                                          | VAM3          | YGL124C                 | MON1          |
| YGL066W                                          | SGF73         | YOR290C                 | SNF2          |
| YER107C                                          | GLE2          | YDR485C                 | VPS72         |
| YJL006C                                          | CTK2          | YPR119W                 | CLB2          |
| YFR021W                                          | ATG18         | YML059C                 | NTE1          |
| YOR005C                                          | DNL4          | YLR265C                 | NEJ1          |
| YPR017C                                          | DSS4          | YML001W                 | YPT7          |
| YPL042C                                          | SSN3          | YJL124C                 | LSM1          |

| Predictions at threshold level 0.85 continued... |               |                         |               |
|--------------------------------------------------|---------------|-------------------------|---------------|
| Gene1 of predicted pair                          |               | Gene2 of predicted pair |               |
| Systematic Name                                  | Standard Name | Systematic Name         | Standard Name |
| YDR329C                                          | PEX3          | YLR191W                 | PEX13         |
| YDL160C                                          | DHH1          | YDR507C                 | GIN4          |
| YKL025C                                          | PAN3          | YGL094C                 | PAN2          |
| YOR112W                                          | CEX1          | YPL120W                 | VPS30         |
| YHL006C                                          | SHU1          | YLR376C                 | PSY3          |
| YNL227C                                          | JJJ1          | YBR119W                 | MUD1          |
| YIL156W                                          | UBP7          | YKL129C                 | MYO3          |
| YFR031C-A                                        | RPL2A         | YLR180W                 | SAM1          |
| YMR109W                                          | MYO5          | YJL183W                 | MNN11         |
| YLR337C                                          | VRP1          | YBR108W                 | YBR108W       |
| YLR360W                                          | VPS38         | YCL001W                 | RER1          |
| YKL025C                                          | PAN3          | YLR386W                 | VAC14         |
| YIL076W                                          | SEC28         | YBL025W                 | RRN10         |
| YOL051W                                          | GAL11         | YPL248C                 | GAL4          |
| YBL021C                                          | HAP3          | YGL237C                 | HAP2          |
| YGL223C                                          | COG1          | YNR049C                 | MSO1          |
| YPL042C                                          | SSN3          | YNL107W                 | YAF9          |
| YMR224C                                          | MRE11         | YJR090C                 | GRR1          |
| YPL183C                                          | YPL183C       | YBR061C                 | TRM7          |
| YBL008W                                          | HIR1          | YDR363W-A               | SEM1          |
| YDR225W                                          | HTA1          | YBR111W-A               | SUS1          |
| YEL027W                                          | CUP5          | YEL051W                 | VMA8          |
| YDR080W                                          | VPS41         | YLR093C                 | NYV1          |
| YFR034C                                          | PHO4          | YNL289W                 | PCL1          |
| YPL129W                                          | TAF14         | YNL236W                 | SIN4          |
| YDL185W                                          | TFP1          | YMR054W                 | STV1          |
| YDR076W                                          | RAD55         | YKL114C                 | APN1          |
| YNL206C                                          | RTT106        | YKR048C                 | NAP1          |
| YDR477W                                          | SNF1          | YDL229W                 | SSB1          |

| Predictions at threshold level 0.85 continued... |               |                         |               |
|--------------------------------------------------|---------------|-------------------------|---------------|
| Gene1 of predicted pair                          |               | Gene2 of predicted pair |               |
| Systematic Name                                  | Standard Name | Systematic Name         | Standard Name |
| YNR031C                                          | SSK2          | YPR119W                 | CLB2          |
| YMR038C                                          | CCS1          | YKL114C                 | APN1          |
| YBR009C                                          | HHF1          | YDR071C                 | PAA1          |
| YLL039C                                          | UBI4          | YJL183W                 | MNN11         |
| YLR148W                                          | PEP3          | YML001W                 | YPT7          |
| YDL005C                                          | MED2          | YPL248C                 | GAL4          |
| YCL037C                                          | SRO9          | YOL108C                 | INO4          |
| YLR079W                                          | SIC1          | YGR270W                 | YTA7          |
| YMR004W                                          | MVP1          | YML038C                 | YMD8          |
| YDR484W                                          | VPS52         | YGL212W                 | VAM7          |
| YEL027W                                          | CUP5          | YGR105W                 | VMA21         |
| YJR040W                                          | GEF1          | YAL002W                 | VPS8          |
| YPL042C                                          | SSN3          | YOL145C                 | CTR9          |
| YHR052W                                          | CIC1          | YER002W                 | NOP16         |
| YDR320C                                          | SWA2          | YOR109W                 | INP53         |
| YMR068W                                          | AVO2          | YIL105C                 | SLM1          |
| YLL007C                                          | YLL007C       | YPL253C                 | VIK1          |
| YLR234W                                          | TOP3          | YHR114W                 | BZZ1          |
| YDR507C                                          | GIN4          | YPL161C                 | BEM4          |
| YMR204C                                          | INP1          | YBR168W                 | PEX32         |
| YOR106W                                          | VAM3          | YPL195W                 | APL5          |
| YKR020W                                          | VPS51         | YEL036C                 | ANP1          |
| YNL087W                                          | TCB2          | YGL013C                 | PDR1          |
| YHR012W                                          | VPS29         | YNL238W                 | KEX2          |
| YNL238W                                          | KEX2          | YLR093C                 | NYV1          |
| YDR293C                                          | SSD1          | YDR289C                 | RTT103        |
| YEL009C                                          | GCN4          | YGL025C                 | PGD1          |
| YCR097W                                          | HMRA1         | YCL067C                 | HMLALPHA2     |
| YHR200W                                          | RPN10         | YLR357W                 | RSC2          |

| Predictions at threshold level 0.85 continued... |               |                         |               |
|--------------------------------------------------|---------------|-------------------------|---------------|
| Gene1 of predicted pair                          |               | Gene2 of predicted pair |               |
| Systematic Name                                  | Standard Name | Systematic Name         | Standard Name |
| YLR148W                                          | PEP3          | YOR106W                 | VAM3          |
| YMR199W                                          | CLN1          | YJL157C                 | FAR1          |
| YKR014C                                          | YPT52         | YML071C                 | COG8          |
| YDL116W                                          | NUP84         | YKL110C                 | KTI12         |
| YOR212W                                          | STE4          | YJR086W                 | STE18         |
| YBR239C                                          | YBR239C       | YHR016C                 | YSC84         |
| YPL129W                                          | TAF14         | YIR009W                 | MSL1          |
| YGL135W                                          | RPL1B         | YDR137W                 | RGP1          |
| YDR004W                                          | RAD57         | YLR288C                 | MEC3          |
| YNL293W                                          | MSB3          | YNR049C                 | MSO1          |
| YPL019C                                          | VTC3          | YER072W                 | VTC1          |
| YKL025C                                          | PAN3          | YML058W                 | SML1          |
| YBR009C                                          | HHF1          | YBR010W                 | HHT1          |
| YJL176C                                          | SWI3          | YKL109W                 | HAP4          |
| YDR176W                                          | NGG1          | YOL051W                 | GAL11         |
| YNL288W                                          | CAF40         | YDL155W                 | CLB3          |
| YLR148W                                          | PEP3          | YBR131W                 | CCZ1          |
| YGR100W                                          | MDR1          | YPR028W                 | YOP1          |
| YMR243C                                          | ZRC1          | YPL058C                 | PDR12         |
| YGR133W                                          | PEX4          | YOR035C                 | SHE4          |
| YJR024C                                          | MDE1          | YKL068W                 | NUP100        |
| YHR013C                                          | ARD1          | YBR082C                 | UBC4          |
| YDR146C                                          | SWI5          | YGR089W                 | NNF2          |
| YNL135C                                          | FPR1          | YHR012W                 | VPS29         |
| YJL204C                                          | RCY1          | YAL030W                 | SNC1          |
| YPL024W                                          | RMI1          | YMR224C                 | MRE11         |
| YMR198W                                          | CIK1          | YJR135C                 | MCM22         |
| YDR440W                                          | DOT1          | YOR141C                 | ARP8          |
| YHR060W                                          | VMA22         | YGR105W                 | VMA21         |

| Predictions at threshold level 0.85 continued... |               |                         |               |
|--------------------------------------------------|---------------|-------------------------|---------------|
| Gene1 of predicted pair                          |               | Gene2 of predicted pair |               |
| Systematic Name                                  | Standard Name | Systematic Name         | Standard Name |
| YBR200W                                          | BEM1          | YPL256C                 | CLN2          |
| YBR065C                                          | ECM2          | YPL213W                 | LEA1          |
| YBR289W                                          | SNF5          | YNL030W                 | HHF2          |
| YDL065C                                          | PEX19         | YGR209C                 | TRX2          |
| YKR020W                                          | VPS51         | YLR396C                 | VPS33         |
| YDR195W                                          | REF2          | YOR179C                 | SYC1          |
| YNR023W                                          | SNF12         | YPL240C                 | HSP82         |
| YOL090W                                          | MSH2          | YGR258C                 | RAD2          |
| YDR156W                                          | RPA14         | YFR032C-A               | RPL29         |
| YHR200W                                          | RPN10         | YGR232W                 | NAS6          |
| YBR274W                                          | CHK1          | YOR043W                 | WHI2          |
| YMR139W                                          | RIM11         | YMR042W                 | ARG80         |
| YPL213W                                          | LEA1          | YNL079C                 | TPM1          |
| YMR284W                                          | YKU70         | YDR227W                 | SIR4          |
| YLR381W                                          | CTF3          | YPL161C                 | BEM4          |
| YOL148C                                          | SPT20         | YDR216W                 | ADR1          |
| YPR120C                                          | CLB5          | YNL225C                 | CNM67         |
| YDR174W                                          | HMO1          | YML016C                 | PPZ1          |
| YDR146C                                          | SWI5          | YMR055C                 | BUB2          |
| YNL069C                                          | RPL16B        | YHL020C                 | OPI1          |
| YGR129W                                          | SYF2          | YPR101W                 | SNT309        |
| YAL024C                                          | LTE1          | YOL081W                 | IRA2          |
| YLR119W                                          | SRN2          | YLR452C                 | SST2          |
| YPR018W                                          | RLF2          | YPR120C                 | CLB5          |
| YDR176W                                          | NGG1          | YNL107W                 | YAF9          |
| YGR270W                                          | YTA7          | YPR120C                 | CLB5          |
| YGL025C                                          | PGD1          | YLR370C                 | ARC18         |
| YNL025C                                          | SSN8          | YCR081W                 | SRB8          |
| YIL159W                                          | BNR1          | YJL172W                 | CPS1          |



| Predictions at threshold level 0.85 continued... |               |                         |               |
|--------------------------------------------------|---------------|-------------------------|---------------|
| Gene1 of predicted pair                          |               | Gene2 of predicted pair |               |
| Systematic Name                                  | Standard Name | Systematic Name         | Standard Name |
| YHR060W                                          | VMA22         | YBL025W                 | RRN10         |
| YBR171W                                          | SEC66         | YEL036C                 | ANP1          |
| YLR381W                                          | CTF3          | YLR032W                 | RAD5          |
| YIR005W                                          | IST3          | YFR036W                 | CDC26         |
| YBL079W                                          | NUP170        | YML057W                 | CMP2          |
| YDR383C                                          | NKP1          | YLR254C                 | NDL1          |
| YIL076W                                          | SEC28         | YNL307C                 | MCK1          |
| YLR381W                                          | CTF3          | YDR363W-A               | SEM1          |
| YHR157W                                          | REC104        | YMR133W                 | REC114        |
| YJL154C                                          | VPS35         | YKL119C                 | VPH2          |
| YNL215W                                          | IES2          | YDL002C                 | NHP10         |
| YOR109W                                          | INP53         | YJR058C                 | APS2          |
| YOR109W                                          | INP53         | YER120W                 | SCS2          |
| YNL069C                                          | RPL16B        | YER122C                 | GLO3          |
| YHR108W                                          | GGA2          | YDR153C                 | ENT5          |
| YHL006C                                          | SHU1          | YDR078C                 | SHU2          |
| YGL212W                                          | VAM7          | YEL036C                 | ANP1          |
| YDR309C                                          | GIC2          | YPL256C                 | CLN2          |
| YGL163C                                          | RAD54         | YKL114C                 | APN1          |
| YMR125W                                          | STO1          | YKL068W                 | NUP100        |
| YJL124C                                          | LSM1          | YPL152W                 | RRD2          |
| YLR384C                                          | IKI3          | YHR187W                 | IKI1          |
| YFR010W                                          | UBP6          | YGR135W                 | PRE9          |
| YDL154W                                          | MSH5          | YGL249W                 | ZIP2          |
| YDR245W                                          | MNN10         | YHR012W                 | VPS29         |
| YML095C                                          | RAD10         | YDL059C                 | RAD59         |
| YBL103C                                          | RTG3          | YPR119W                 | CLB2          |
| YKL048C                                          | ELM1          | YJL006C                 | CTK2          |
| YMR201C                                          | RAD14         | YGR258C                 | RAD2          |

| Predictions at threshold level 0.85 continued... |               |                         |               |
|--------------------------------------------------|---------------|-------------------------|---------------|
| Gene1 of predicted pair                          |               | Gene2 of predicted pair |               |
| Systematic Name                                  | Standard Name | Systematic Name         | Standard Name |
| YPL129W                                          | TAF14         | YBR111W-A               | SUS1          |
| YLR288C                                          | MEC3          | YER032W                 | FIR1          |
| YLR216C                                          | CPR6          | YNL135C                 | FPR1          |
| YOR033C                                          | EXO1          | YPR120C                 | CLB5          |
| YGL190C                                          | CDC55         | YPR135W                 | CTF4          |
| YHR134W                                          | WSS1          | YJL187C                 | SWE1          |
| YBL008W                                          | HIR1          | YGL115W                 | SNF4          |
| YFR008W                                          | FAR7          | YMR029C                 | FAR8          |
| YDR443C                                          | SSN2          | YNL288W                 | CAF40         |
| YGR019W                                          | UGA1          | YLR360W                 | VPS38         |
| YBR173C                                          | UMP1          | YGR184C                 | UBR1          |
| YNL079C                                          | TPM1          | YHR158C                 | KEL1          |
| YDL101C                                          | DUN1          | YHR134W                 | WSS1          |
| YPL161C                                          | BEM4          | YNL076W                 | MKS1          |
| YDR358W                                          | GGA1          | YER040W                 | GLN3          |
| YMR179W                                          | SPT21         | YKL101W                 | HSL1          |
| YOR231W                                          | MKK1          | YDL006W                 | PTC1          |
| YBR082C                                          | UBC4          | YDR207C                 | UME6          |
| YJL029C                                          | VPS53         | YJL164C                 | TPK1          |
| YPL024W                                          | RMI1          | YMR133W                 | REC114        |
| YBR107C                                          | IML3          | YJR060W                 | CBF1          |
| YBR127C                                          | VMA2          | YGR105W                 | VMA21         |
| YDR103W                                          | STE5          | YLR362W                 | STE11         |
| YMR192W                                          | GYL1          | YPL249C                 | GYP5          |
| YDR507C                                          | GIN4          | YCL032W                 | STE50         |
| YGL178W                                          | MPT5          | YDR334W                 | SWR1          |
| YDR254W                                          | CHL4          | YAL002W                 | VPS8          |
| YBR010W                                          | HHT1          | YOR141C                 | ARP8          |
| YGL190C                                          | CDC55         | YKL113C                 | RAD27         |

| Predictions at threshold level 0.85 continued... |               |                         |               |
|--------------------------------------------------|---------------|-------------------------|---------------|
| Gene1 of predicted pair                          |               | Gene2 of predicted pair |               |
| Systematic Name                                  | Standard Name | Systematic Name         | Standard Name |
| YHR111W                                          | UBA4          | YLR254C                 | NDL1          |
| YLR234W                                          | TOP3          | YML115C                 | VAN1          |
| YML109W                                          | ZDS2          | YER124C                 | DSE1          |
| YFR031C-A                                        | RPL2A         | YCL037C                 | SRO9          |
| YMR095C                                          | SNO1          | YGL033W                 | HOP2          |
| YGL051W                                          | MST27         | YAR033W                 | MST28         |
| YEL009C                                          | GCN4          | YBR010W                 | HHT1          |
| YHR134W                                          | WSS1          | YGL237C                 | HAP2          |
| YML109W                                          | ZDS2          | YCR077C                 | PAT1          |
| YFR032C-A                                        | RPL29         | YMR205C                 | PFK2          |
| YGR252W                                          | GCN5          | YDR216W                 | ADR1          |
| YDR477W                                          | SNF1          | YNL076W                 | MKS1          |
| YDR103W                                          | STE5          | YDL159W                 | STE7          |
| YOL090W                                          | MSH2          | YJR035W                 | RAD26         |
| YIL159W                                          | BNR1          | YML115C                 | VAN1          |
| YJR010C-A                                        | SPC1          | YDL006W                 | PTC1          |
| YBR133C                                          | HSL7          | YKL101W                 | HSL1          |
| YJL176C                                          | SWI3          | YHL025W                 | SNF6          |
| YMR055C                                          | BUB2          | YDR254W                 | CHL4          |
| YDR443C                                          | SSN2          | YNL236W                 | SIN4          |
| YNL094W                                          | APP1          | YOR284W                 | HUA2          |
| YDR192C                                          | NUP42         | YHR052W                 | CIC1          |
| YNL041C                                          | COG6          | YNL051W                 | COG5          |
| YOR327C                                          | SNC2          | YDR153C                 | ENT5          |
| YCR002C                                          | CDC10         | YNL078W                 | NIS1          |
| YNL288W                                          | CAF40         | YLR381W                 | CTF3          |
| YIL076W                                          | SEC28         | YKL160W                 | ELF1          |
| YGL212W                                          | VAM7          | YOR036W                 | PEP12         |
| YDR225W                                          | HTA1          | YBR133C                 | HSL7          |

| Predictions at threshold level 0.85 continued... |               |                         |               |
|--------------------------------------------------|---------------|-------------------------|---------------|
| Gene1 of predicted pair                          |               | Gene2 of predicted pair |               |
| Systematic Name                                  | Standard Name | Systematic Name         | Standard Name |
| YOR270C                                          | VPH1          | YER072W                 | VTC1          |
| YFR021W                                          | ATG18         | YER162C                 | RAD4          |
| YOL111C                                          | MDY2          | YEL060C                 | PRB1          |
| YDR078C                                          | SHU2          | YLR376C                 | PSY3          |
| YDR443C                                          | SSN2          | YGR104C                 | SRB5          |
| YPL129W                                          | TAF14         | YDR146C                 | SWI5          |
| YOR127W                                          | RGA1          | YGR270W                 | YTA7          |
| YLR396C                                          | VPS33         | YOR036W                 | PEP12         |
| YLR410W                                          | VIP1          | YJL140W                 | RPB4          |
| YDR484W                                          | VPS52         | YNL041C                 | COG6          |
| YBR017C                                          | KAP104        | YKL068W                 | NUP100        |
| YBR200W                                          | BEM1          | YDR507C                 | GIN4          |
| YPL129W                                          | TAF14         | YOL148C                 | SPT20         |
| YLR216C                                          | CPR6          | YNL069C                 | RPL16B        |
| YDR225W                                          | HTA1          | YER110C                 | KAP123        |
| YPL024W                                          | RMI1          | YBL025W                 | RRN10         |
| YEL043W                                          | YEL043W       | YDL006W                 | PTC1          |
| YGL237C                                          | HAP2          | YMR109W                 | MYO5          |
| YEL009C                                          | GCN4          | YPR072W                 | NOT5          |
| YNL106C                                          | INP52         | YDR080W                 | VPS41         |
| YGR067C                                          | YGR067C       | YPL240C                 | HSP82         |
| YDL227C                                          | HO            | YML088W                 | UFO1          |
| YPL234C                                          | TFP3          | YKL119C                 | VPH2          |
| YGL006W                                          | PMC1          | YLR093C                 | NYV1          |
| YER096W                                          | SHC1          | YJL095W                 | BCK1          |
| YGR275W                                          | RTT102        | YLR357W                 | RSC2          |
| YGR133W                                          | PEX4          | YBL047C                 | EDE1          |
| YGR239C                                          | PEX21         | YLR191W                 | PEX13         |
| YBL021C                                          | HAP3          | YKL109W                 | HAP4          |

| Predictions at threshold level 0.85 continued... |               |                         |               |
|--------------------------------------------------|---------------|-------------------------|---------------|
| Gene1 of predicted pair                          |               | Gene2 of predicted pair |               |
| Systematic Name                                  | Standard Name | Systematic Name         | Standard Name |
| YIL072W                                          | HOP1          | YOR351C                 | MEK1          |
| YPR029C                                          | APL4          | YOR036W                 | PEP12         |
| YPL129W                                          | TAF14         | YKL109W                 | HAP4          |
| YDR507C                                          | GIN4          | YDR309C                 | GIC2          |
| YDR076W                                          | RAD55         | YPR119W                 | CLB2          |
| YPL129W                                          | TAF14         | YGR252W                 | GCN5          |
| YKL007W                                          | CAP1          | YPR171W                 | BSP1          |
| YLL039C                                          | UBI4          | YPL050C                 | MNN9          |
| YGL066W                                          | SGF73         | YJL140W                 | RPB4          |
| YER087C-B                                        | SBH1          | YDL232W                 | OST4          |
| YGR261C                                          | APL6          | YNL051W                 | COG5          |
| YLR061W                                          | RPL22A        | YGR133W                 | PEX4          |
| YDR139C                                          | RUB1          | YLR128W                 | DCN1          |
| YEL009C                                          | GCN4          | YPL042C                 | SSN3          |
| YPL115C                                          | BEM3          | YJL187C                 | SWE1          |
| YEL009C                                          | GCN4          | YLR176C                 | RFX1          |
| YLR170C                                          | APS1          | YOR036W                 | PEP12         |
| YPL129W                                          | TAF14         | YER161C                 | SPT2          |
| YDR004W                                          | RAD57         | YDL154W                 | MSH5          |
| YLR240W                                          | VPS34         | YDR323C                 | PEP7          |
| YHL031C                                          | GOS1          | YAL030W                 | SNC1          |
| YEL027W                                          | CUP5          | YLR447C                 | VMA6          |
| YDR192C                                          | NUP42         | YLR131C                 | ACE2          |
| YNL229C                                          | URE2          | YDL047W                 | SIT4          |
| YLR191W                                          | PEX13         | YDR265W                 | PEX10         |
| YLR240W                                          | VPS34         | YLR360W                 | VPS38         |
| YEL009C                                          | GCN4          | YGL252C                 | RTG2          |
| YMR224C                                          | MRE11         | YMR179W                 | SPT21         |
| YKR048C                                          | NAP1          | YNL078W                 | NIS1          |

| Predictions at threshold level 0.85 continued... |               |                         |               |
|--------------------------------------------------|---------------|-------------------------|---------------|
| Gene1 of predicted pair                          |               | Gene2 of predicted pair |               |
| Systematic Name                                  | Standard Name | Systematic Name         | Standard Name |
| YHR178W                                          | STB5          | YGL013C                 | PDR1          |
| YFR024C-A                                        | LSB3          | YJL004C                 | SYS1          |
| YKR099W                                          | BAS1          | YOR035C                 | SHE4          |
| YER042W                                          | MXR1          | YGR209C                 | TRX2          |
| YDR496C                                          | PUF6          | YKL130C                 | SHE2          |
| YOR327C                                          | SNC2          | YDL047W                 | SIT4          |
| YOR083W                                          | WHI5          | YPR119W                 | CLB2          |
| YLR433C                                          | CNA1          | YGR006W                 | PRP18         |
| YPR084W                                          | YPR084W       | YLR360W                 | VPS38         |
| YNL041C                                          | COG6          | YKR014C                 | YPT52         |
| YKL139W                                          | CTK1          | YCL011C                 | GBP2          |
| YCL027W                                          | FUS1          | YKL092C                 | BUD2          |
| YNL218W                                          | MGS1          | YBR228W                 | SLX1          |
| YBL003C                                          | HTA2          | YNL107W                 | YAF9          |
| YDR146C                                          | SWI5          | YML016C                 | PPZ1          |
| YDL116W                                          | NUP84         | YML103C                 | NUP188        |
| YGL025C                                          | PGD1          | YPL248C                 | GAL4          |
| YDR245W                                          | MNN10         | YKL041W                 | VPS24         |
| YMR109W                                          | MYO5          | YOR247W                 | SRL1          |
| YGR104C                                          | SRB5          | YGL151W                 | NUT1          |
| YGL212W                                          | VAM7          | YGL200C                 | EMP24         |
| YHL025W                                          | SNF6          | YLR357W                 | RSC2          |
| YER052C                                          | HOM3          | YNL135C                 | FPR1          |
| YOR156C                                          | NFI1          | YDR469W                 | SDC1          |
| YKR001C                                          | VPS1          | YMR204C                 | INP1          |
| YCR065W                                          | HCM1          | YNL041C                 | COG6          |
| YPL161C                                          | BEM4          | YCR086W                 | CSM1          |
| YKL135C                                          | APL2          | YDR358W                 | GGA1          |
| YER019C-A                                        | SBH2          | YML019W                 | OST6          |

| Predictions at threshold level 0.85 continued... |               |                         |               |
|--------------------------------------------------|---------------|-------------------------|---------------|
| Gene1 of predicted pair                          |               | Gene2 of predicted pair |               |
| Systematic Name                                  | Standard Name | Systematic Name         | Standard Name |
| YKR001C                                          | VPS1          | YML001W                 | YPT7          |
| YOL051W                                          | GAL11         | YDR363W-A               | SEM1          |
| YNL243W                                          | SLA2          | YKL135C                 | APL2          |
| YDR448W                                          | ADA2          | YPL042C                 | SSN3          |
| YOR069W                                          | VPS5          | YPL037C                 | EGD1          |
| YHR206W                                          | SKN7          | YJR074W                 | MOG1          |
| YJL154C                                          | VPS35         | YHR134W                 | WSS1          |
| YOR270C                                          | VPH1          | YKL080W                 | VMA5          |
| YHR161C                                          | YAP1801       | YNR049C                 | MSO1          |
| YJL089W                                          | SIP4          | YMR280C                 | CAT8          |
| YPL115C                                          | BEM3          | YLR006C                 | SSK1          |
| YPL022W                                          | RAD1          | YML102W                 | CAC2          |
| YJL053W                                          | PEP8          | YKR001C                 | VPS1          |
| YBR200W                                          | BEM1          | YDR171W                 | HSP42         |
| YGL212W                                          | VAM7          | YAL030W                 | SNC1          |
| YEL009C                                          | GCN4          | YBR111W-A               | SUS1          |
| YHR098C                                          | SFB3          | YJR075W                 | HOC1          |
| YLR288C                                          | MEC3          | YDR076W                 | RAD55         |
| YLR192C                                          | HCR1          | YMR142C                 | RPL13B        |
| YNL307C                                          | MCK1          | YER122C                 | GLO3          |
| YOL147C                                          | PEX11         | YDL065C                 | PEX19         |
| YLL022C                                          | HIF1          | YBR009C                 | HHF1          |
| YPL161C                                          | BEM4          | YNL090W                 | RHO2          |
| YGL161C                                          | YIP5          | YDR289C                 | RTT103        |
| YDL185W                                          | TFP1          | YJR033C                 | RAV1          |
| YOR358W                                          | HAP5          | YJL095W                 | BCK1          |
| YDR245W                                          | MNN10         | YBR041W                 | FAT1          |
| YCL067C                                          | HMLALPHA2     | YCR084C                 | TUP1          |
| YER107C                                          | GLE2          | YKR082W                 | NUP133        |

| Predictions at threshold level 0.85 continued... |               |                         |               |
|--------------------------------------------------|---------------|-------------------------|---------------|
| Gene1 of predicted pair                          |               | Gene2 of predicted pair |               |
| Systematic Name                                  | Standard Name | Systematic Name         | Standard Name |
| YJL183W                                          | MNN11         | YEL036C                 | ANP1          |
| YOL044W                                          | PEX15         | YGR077C                 | PEX8          |
| YMR142C                                          | RPL13B        | YOL121C                 | RPS19A        |
| YLL026W                                          | HSP104        | YLR357W                 | RSC2          |
| YGL223C                                          | COG1          | YJR040W                 | GEF1          |
| YJR032W                                          | CPR7          | YJL183W                 | MNN11         |
| YDR335W                                          | MSN5          | YBL079W                 | NUP170        |
| YDR480W                                          | DIG2          | YBL016W                 | FUS3          |
| YBR200W                                          | BEM1          | YJR060W                 | CBF1          |
| YLR148W                                          | PEP3          | YPL195W                 | APL5          |
| YDR225W                                          | HTA1          | YNL206C                 | RTT106        |
| YBR127C                                          | VMA2          | YEL051W                 | VMA8          |
| YPL161C                                          | BEM4          | YPL256C                 | CLN2          |
| YML012W                                          | ERV25         | YML067C                 | ERV41         |
| YDR484W                                          | VPS52         | YLR093C                 | NYV1          |
| YOR304W                                          | ISW2          | YJR094C                 | IME1          |
| YCR084C                                          | TUP1          | YPR068C                 | HOS1          |
| YLR370C                                          | ARC18         | YHL002W                 | HSE1          |
| YBL102W                                          | SFT2          | YML001W                 | YPT7          |
| YOR038C                                          | HIR2          | YDR440W                 | DOT1          |
| YOR275C                                          | RIM20         | YHL027W                 | RIM101        |
| YCR020C-A                                        | MAK31         | YPR032W                 | SRO7          |
| YJR032W                                          | CPR7          | YAL002W                 | VPS8          |
| YNL325C                                          | FIG4          | YLR398C                 | SKI2          |
| YBR108W                                          | YBR108W       | YGL115W                 | SNF4          |
| YCR084C                                          | TUP1          | YBR010W                 | HHT1          |
| YDR244W                                          | PEX5          | YDR142C                 | PEX7          |
| YDR137W                                          | RGP1          | YOR035C                 | SHE4          |
| YOR132W                                          | VPS17         | YGR105W                 | VMA21         |



| Predictions at threshold level 0.85 continued... |               |                         |               |
|--------------------------------------------------|---------------|-------------------------|---------------|
| Gene1 of predicted pair                          |               | Gene2 of predicted pair |               |
| Systematic Name                                  | Standard Name | Systematic Name         | Standard Name |
| YOR231W                                          | MKK1          | YLR313C                 | SPH1          |
| YOR358W                                          | HAP5          | YML057W                 | CMP2          |
| YBR215W                                          | HPC2          | YDL226C                 | GCS1          |
| YLR360W                                          | VPS38         | YHR013C                 | ARD1          |
| YBR107C                                          | IML3          | YHR200W                 | RPN10         |
| YLR452C                                          | SST2          | YPR119W                 | CLB2          |
| YDL065C                                          | PEX19         | YPL112C                 | PEX25         |
| YLR148W                                          | PEP3          | YDL077C                 | VAM6          |
| YPR131C                                          | NAT3          | YDR254W                 | CHL4          |
| YJL176C                                          | SWI3          | YBR289W                 | SNF5          |
| YJL122W                                          | ALB1          | YHR052W                 | CIC1          |
| YLR094C                                          | GIS3          | YER162C                 | RAD4          |
| YLR381W                                          | CTF3          | YBR107C                 | IML3          |
| YGR192C                                          | TDH3          | YPR119W                 | CLB2          |
| YJL128C                                          | PBS2          | YDL006W                 | PTC1          |
| YBR020W                                          | GAL1          | YCL011C                 | GBP2          |
| YOR083W                                          | WHI5          | YNL107W                 | YAF9          |
| YGR020C                                          | VMA7          | YDL185W                 | TFP1          |
| YIL076W                                          | SEC28         | YML115C                 | VAN1          |
| YER143W                                          | DDI1          | YOR327C                 | SNC2          |
| YBR228W                                          | SLX1          | YGL175C                 | SAE2          |
| YNL215W                                          | IES2          | YPL129W                 | TAF14         |
| YOL151W                                          | GRE2          | YPR119W                 | CLB2          |
| YER107C                                          | GLE2          | YKL057C                 | NUP120        |
| YFL026W                                          | STE2          | YNR006W                 | VPS27         |
| YPL024W                                          | RMI1          | YGR071C                 | YGR071C       |
| YOR101W                                          | RAS1          | YIL033C                 | BCY1          |
| YDR448W                                          | ADA2          | YGL025C                 | PGD1          |
| YOR083W                                          | WHI5          | YBR200W                 | BEM1          |

| Predictions at threshold level 0.85 continued... |               |                         |               |
|--------------------------------------------------|---------------|-------------------------|---------------|
| Gene1 of predicted pair                          |               | Gene2 of predicted pair |               |
| Systematic Name                                  | Standard Name | Systematic Name         | Standard Name |
| YLR234W                                          | TOP3          | YDR076W                 | RAD55         |
| YBR173C                                          | UMP1          | YER144C                 | UBP5          |
| YHR084W                                          | STE12         | YLR441C                 | RPS1A         |
| YOR127W                                          | RGA1          | YCR086W                 | CSM1          |
| YGR252W                                          | GCN5          | YNL107W                 | YAF9          |
| YDL020C                                          | RPN4          | YKR030W                 | GMH1          |
| YNL068C                                          | FKH2          | YOR195W                 | SLK19         |
| YOL051W                                          | GAL11         | YNL031C                 | HHT2          |
| YPL129W                                          | TAF14         | YDR073W                 | SNF11         |
| YJL058C                                          | BIT61         | YPR119W                 | CLB2          |
| YPR046W                                          | MCM16         | YGL003C                 | CDH1          |
| YNL215W                                          | IES2          | YDR363W-A               | SEM1          |
| YLR109W                                          | AHP1          | YIL008W                 | URM1          |
| YDR439W                                          | LRS4          | YLR182W                 | SWI6          |
| YBL017C                                          | PEP1          | YJL029C                 | VPS53         |
| YPR018W                                          | RLF2          | YBR010W                 | HHT1          |
| YLR079W                                          | SIC1          | YOR080W                 | DIA2          |
| YFL023W                                          | BUD27         | YMR311C                 | GLC8          |
| YNL288W                                          | CAF40         | YPR072W                 | NOT5          |
| YML103C                                          | NUP188        | YML057W                 | CMP2          |
| YLL039C                                          | UBI4          | YKR020W                 | VPS51         |
| YNR052C                                          | POP2          | YGR134W                 | CAF130        |
| YGL060W                                          | YBP2          | YGL115W                 | SNF4          |
| YLL010C                                          | PSR1          | YOR043W                 | WHI2          |
| YJR040W                                          | GEF1          | YHR039C-A               | VMA10         |
| YMR224C                                          | MRE11         | YCR066W                 | RAD18         |
| YPL213W                                          | LEA1          | YGR135W                 | PRE9          |
| YNR031C                                          | SSK2          | YCR073C                 | SSK22         |
| YDR202C                                          | RAV2          | YGR105W                 | VMA21         |

| Predictions at threshold level 0.85 continued... |               |                         |               |
|--------------------------------------------------|---------------|-------------------------|---------------|
| Gene1 of predicted pair                          |               | Gene2 of predicted pair |               |
| Systematic Name                                  | Standard Name | Systematic Name         | Standard Name |
| YDR073W                                          | SNF11         | YKL109W                 | HAP4          |
| YFR010W                                          | UBP6          | YPR119W                 | CLB2          |
| YGR071C                                          | YGR071C       | YPL079W                 | RPL21B        |
| YGL174W                                          | BUD13         | YIR005W                 | IST3          |
| YPL045W                                          | VPS16         | YDR323C                 | PEP7          |
| YER161C                                          | SPT2          | YOR308C                 | SNU66         |
| YMR201C                                          | RAD14         | YJR052W                 | RAD7          |
| YDL160C                                          | DHH1          | YML109W                 | ZDS2          |
| YOR080W                                          | DIA2          | YDR385W                 | EFT2          |
| YLR303W                                          | MET17         | YLR377C                 | FBP1          |
| YDL020C                                          | RPN4          | YKL041W                 | VPS24         |
| YJL154C                                          | VPS35         | YKR001C                 | VPS1          |
| YLR148W                                          | PEP3          | YDR080W                 | VPS41         |
| YKL139W                                          | CTK1          | YLR398C                 | SKI2          |
| YJL210W                                          | PEX2          | YGL153W                 | PEX14         |
| YFR024C-A                                        | LSB3          | YPL246C                 | RBD2          |
| YKR101W                                          | SIR1          | YMR273C                 | ZDS1          |
| YBR270C                                          | BIT2          | YJL058C                 | BIT61         |
| YJL190C                                          | RPS22A        | YAR014C                 | BUD14         |
| YDR425W                                          | SNX41         | YJL036W                 | SNX4          |
| YDR137W                                          | RGP1          | YLR452C                 | SST2          |
| YML115C                                          | VAN1          | YHL002W                 | HSE1          |
| YJL124C                                          | LSM1          | YCR077C                 | PAT1          |
| YOL082W                                          | ATG19         | YKL103C                 | LAP4          |
| YEL022W                                          | GEA2          | YER122C                 | GLO3          |
| YJL089W                                          | SIP4          | YER027C                 | GAL83         |
| YKL139W                                          | CTK1          | YDL192W                 | ARF1          |
| YMR219W                                          | ESC1          | YPR119W                 | CLB2          |
| YKL139W                                          | CTK1          | YHR167W                 | THP2          |

| Predictions at threshold level 0.85 continued... |               |                         |               |
|--------------------------------------------------|---------------|-------------------------|---------------|
| Gene1 of predicted pair                          |               | Gene2 of predicted pair |               |
| Systematic Name                                  | Standard Name | Systematic Name         | Standard Name |
| YDR448W                                          | ADA2          | YJL140W                 | RPB4          |
| YHL022C                                          | SPO11         | YGL003C                 | CDH1          |
| YDR363W-A                                        | SEM1          | YJR135C                 | MCM22         |
| YIL076W                                          | SEC28         | YNR072W                 | HXT17         |
| YHR134W                                          | WSS1          | YBR108W                 | YBR108W       |
| YGR135W                                          | PRE9          | YBR082C                 | UBC4          |
| YLR337C                                          | VRP1          | YIL130W                 | ASG1          |
| YKL007W                                          | CAP1          | YIR003W                 | YIR003W       |
| YDR484W                                          | VPS52         | YKR020W                 | VPS51         |
| YCR065W                                          | HCM1          | YNL107W                 | YAF9          |
| YFR031C-A                                        | RPL2A         | YNL238W                 | KEX2          |
| YPL240C                                          | HSP82         | YER074W-A               | YOS1          |
| YOR106W                                          | VAM3          | YKR001C                 | VPS1          |
| YOR275C                                          | RIM20         | YPR173C                 | VPS4          |
| YDL116W                                          | NUP84         | YBR215W                 | HPC2          |
| YGR040W                                          | KSS1          | YDR480W                 | DIG2          |
| YBL008W                                          | HIR1          | YPL001W                 | HAT1          |
| YHR193C                                          | EGD2          | YPL037C                 | EGD1          |
| YNL206C                                          | RTT106        | YNL031C                 | HHT2          |
| YLR360W                                          | VPS38         | YPL253C                 | VIK1          |
| YML115C                                          | VAN1          | YDR245W                 | MNN10         |
| YDR244W                                          | PEX5          | YIL160C                 | POT1          |
| YER102W                                          | RPS8B         | YBL072C                 | RPS8A         |
| YLR248W                                          | RCK2          | YMR243C                 | ZRC1          |
| YMR159C                                          | ATG16         | YPL149W                 | ATG5          |
| YNL079C                                          | TPM1          | YMR311C                 | GLC8          |
| YKR014C                                          | YPT52         | YAL002W                 | VPS8          |
| YDL116W                                          | NUP84         | YDR439W                 | LRS4          |
| YBR107C                                          | IML3          | YFR036W                 | CDC26         |

| Predictions at threshold level 0.85 continued... |               |                         |               |
|--------------------------------------------------|---------------|-------------------------|---------------|
| Gene1 of predicted pair                          |               | Gene2 of predicted pair |               |
| Systematic Name                                  | Standard Name | Systematic Name         | Standard Name |
| YOR127W                                          | RGA1          | YKL048C                 | ELM1          |
| YIL159W                                          | BNR1          | YKR020W                 | VPS51         |
| YOR115C                                          | TRS33         | YEL022W                 | GEA2          |
| YDR004W                                          | RAD57         | YOR368W                 | RAD17         |
| YPL240C                                          | HSP82         | YER180C-A               | SLO1          |
| YNL293W                                          | MSB3          | YPL256C                 | CLN2          |
| YBR171W                                          | SEC66         | YCL001W                 | RER1          |
| YDL160C                                          | DHH1          | YDR071C                 | PAA1          |
| YBR020W                                          | GAL1          | YPL248C                 | GAL4          |
| YNL236W                                          | SIN4          | YBR089C-A               | NHP6B         |
| YKL048C                                          | ELM1          | YPL018W                 | CTF19         |
| YGL212W                                          | VAM7          | YGL223C                 | COG1          |
| YKL117W                                          | SBA1          | YFL047W                 | RGD2          |
| YLR418C                                          | CDC73         | YBR089C-A               | NHP6B         |
| YGL174W                                          | BUD13         | YLR182W                 | SWI6          |
| YLL039C                                          | UBI4          | YDL190C                 | UFD2          |
| YFR010W                                          | UBP6          | YGR184C                 | UBR1          |
| YOR195W                                          | SLK19         | YLR386W                 | VAC14         |
| YDR171W                                          | HSP42         | YPR119W                 | CLB2          |
| YFR024C-A                                        | LSB3          | YHR114W                 | BZZ1          |
| YGR129W                                          | SYF2          | YPL213W                 | LEA1          |
| YHR161C                                          | YAP1801       | YBL106C                 | SRO77         |
| YDR202C                                          | RAV2          | YPL234C                 | TFP3          |
| YOR270C                                          | VPH1          | YBR127C                 | VMA2          |
| YDR378C                                          | LSM6          | YPL152W                 | RRD2          |
| YKL135C                                          | APL2          | YNR006W                 | VPS27         |
| YDR225W                                          | HTA1          | YNL031C                 | HHT2          |
| YHR061C                                          | GIC1          | YBL085W                 | BOI1          |
| YLR093C                                          | NYV1          | YOL018C                 | TLG2          |

| Predictions at threshold level 0.85 continued... |               |                         |               |
|--------------------------------------------------|---------------|-------------------------|---------------|
| Gene1 of predicted pair                          |               | Gene2 of predicted pair |               |
| Systematic Name                                  | Standard Name | Systematic Name         | Standard Name |
| YLR083C                                          | EMP70         | YCR066W                 | RAD18         |
| YGR261C                                          | APL6          | YPL195W                 | APL5          |
| YPR036W                                          | VMA13         | YEL051W                 | VMA8          |
| YNL199C                                          | GCR2          | YDR207C                 | UME6          |
| YKR020W                                          | VPS51         | YNL238W                 | KEX2          |
| YHR119W                                          | SET1          | YOL145C                 | CTR9          |
| YDR443C                                          | SSN2          | YGR134W                 | CAF130        |
| YJL060W                                          | BNA3          | YPR119W                 | CLB2          |
| YKR001C                                          | VPS1          | YAL002W                 | VPS8          |
| YOL110W                                          | SHR5          | YLR246W                 | ERF2          |
| YGR184C                                          | UBR1          | YDR076W                 | RAD55         |
| YPR036W                                          | VMA13         | YBR171W                 | SEC66         |
| YDR320C                                          | SWA2          | YDL137W                 | ARF2          |
| YML115C                                          | VAN1          | YKR020W                 | VPS51         |
| YOR109W                                          | INP53         | YJL004C                 | SYS1          |
| YMR276W                                          | DSK2          | YHR108W                 | GGA2          |
| YBR200W                                          | BEM1          | YNL248C                 | RPA49         |
| YMR026C                                          | PEX12         | YDR265W                 | PEX10         |
| YGL066W                                          | SGF73         | YNL236W                 | SIN4          |
| YOR033C                                          | EXO1          | YMR106C                 | YKU80         |
| YDR443C                                          | SSN2          | YER068W                 | MOT2          |
| YBL003C                                          | HTA2          | YBR009C                 | HHF1          |
| YER143W                                          | DDI1          | YDL047W                 | SIT4          |
| YJL183W                                          | MNN11         | YJL095W                 | BCK1          |
| YKR099W                                          | BAS1          | YER122C                 | GLO3          |
| YMR127C                                          | SAS2          | YML102W                 | CAC2          |
| YBR111W-A                                        | SUS1          | YLR055C                 | SPT8          |
| YNL106C                                          | INP52         | YJL004C                 | SYS1          |
| YLR324W                                          | PEX30         | YBR168W                 | PEX32         |

| Predictions at threshold level 0.85 continued... |               |                         |               |
|--------------------------------------------------|---------------|-------------------------|---------------|
| Gene1 of predicted pair                          |               | Gene2 of predicted pair |               |
| Systematic Name                                  | Standard Name | Systematic Name         | Standard Name |
| YLR135W                                          | SLX4          | YJL124C                 | LSM1          |
| YLL022C                                          | HIF1          | YEL056W                 | HAT2          |
| YBL102W                                          | SFT2          | YOL018C                 | TLG2          |
| YLR102C                                          | APC9          | YBR200W                 | BEM1          |
| YOR368W                                          | RAD17         | YNL082W                 | PMS1          |
| YMR312W                                          | ELP6          | YHR187W                 | IKI1          |
| YDR244W                                          | PEX5          | YDL065C                 | PEX19         |
| YNL199C                                          | GCR2          | YKL160W                 | ELF1          |
| YLR292C                                          | SEC72         | YLR301W                 | YLR301W       |
| YGL124C                                          | MON1          | YDL077C                 | VAM6          |
| YBR200W                                          | BEM1          | YLR180W                 | SAM1          |
| YDR293C                                          | SSD1          | YHR111W                 | UBA4          |
| YJL004C                                          | SYS1          | YDL226C                 | GCS1          |
| YKR072C                                          | SIS2          | YOR043W                 | WHI2          |
| YGL190C                                          | CDC55         | YDR422C                 | SIP1          |
| YCR084C                                          | TUP1          | YNL167C                 | SKO1          |
| YHR161C                                          | YAP1801       | YDL161W                 | ENT1          |
| YAL051W                                          | OAF1          | YDR310C                 | SUM1          |
| YMR199W                                          | CLN1          | YLR182W                 | SWI6          |
| YBR173C                                          | UMP1          | YER162C                 | RAD4          |
| YBR200W                                          | BEM1          | YKL114C                 | APN1          |
| YGR104C                                          | SRB5          | YDL005C                 | MED2          |
| YLR309C                                          | IMH1          | YER122C                 | GLO3          |
| YLR083C                                          | EMP70         | YNL051W                 | COG5          |
| YNR072W                                          | HXT17         | YML071C                 | COG8          |
| YOR109W                                          | INP53         | YGL115W                 | SNF4          |
| YPL096C-A                                        | ERI1          | YMR089C                 | YTA12         |
| YKL025C                                          | PAN3          | YKL114C                 | APN1          |
| YBL085W                                          | BOI1          | YER158C                 | YER158C       |

| Predictions at threshold level 0.85 continued... |               |                         |               |
|--------------------------------------------------|---------------|-------------------------|---------------|
| Gene1 of predicted pair                          |               | Gene2 of predicted pair |               |
| Systematic Name                                  | Standard Name | Systematic Name         | Standard Name |
| YOR109W                                          | INP53         | YPL259C                 | APM1          |
| YDR245W                                          | MNN10         | YBR260C                 | RGD1          |
| YBR111W-A                                        | SUS1          | YGR252W                 | GCN5          |
| YDR080W                                          | VPS41         | YOL018C                 | TLG2          |
| YFR021W                                          | ATG18         | YLR094C                 | GIS3          |
| YPR101W                                          | SNT309        | YDR163W                 | CWC15         |
| YLR360W                                          | VPS38         | YML001W                 | YPT7          |
| YDR129C                                          | SAC6          | YHL002W                 | HSE1          |
| YPR046W                                          | MCM16         | YJR090C                 | GRR1          |
| YIR003W                                          | YIR003W       | YMR109W                 | MYO5          |
| YHR134W                                          | WSS1          | YDR207C                 | UME6          |
| YBL003C                                          | HTA2          | YKR048C                 | NAP1          |
| YDR378C                                          | LSM6          | YLR182W                 | SWI6          |
| YDL232W                                          | OST4          | YJR010C-A               | SPC1          |
| YPL240C                                          | HSP82         | YML132W                 | COS3          |
| YCR066W                                          | RAD18         | YJL004C                 | SYS1          |
| YLR337C                                          | VRP1          | YBR200W                 | BEM1          |
| YOL072W                                          | THP1          | YBR111W-A               | SUS1          |
| YBL047C                                          | EDE1          | YHR111W                 | UBA4          |
| YNL016W                                          | PUB1          | YBR082C                 | UBC4          |
| YIL053W                                          | RHR2          | YHR039C-A               | VMA10         |
| YHR064C                                          | SSZ1          | YGR285C                 | ZUO1          |
| YNL201C                                          | PSY2          | YNL248C                 | RPA49         |
| YLR018C                                          | POM34         | YER115C                 | SPR6          |
| YFR010W                                          | UBP6          | YAL002W                 | VPS8          |
| YKL032C                                          | IXR1          | YNL229C                 | URE2          |
| YLR148W                                          | PEP3          | YDR323C                 | PEP7          |
| YKR028W                                          | SAP190        | YDL047W                 | SIT4          |
| YCR066W                                          | RAD18         | YPR119W                 | CLB2          |



| Predictions at threshold level 0.85 continued... |               |                         |               |
|--------------------------------------------------|---------------|-------------------------|---------------|
| Gene1 of predicted pair                          |               | Gene2 of predicted pair |               |
| Systematic Name                                  | Standard Name | Systematic Name         | Standard Name |
| YDL113C                                          | ATG20         | YLR191W                 | PEX13         |
| YNL079C                                          | TPM1          | YPL256C                 | CLN2          |
| YNL243W                                          | SLA2          | YPR029C                 | APL4          |
| YOR069W                                          | VPS5          | YEL042W                 | GDA1          |
| YHR134W                                          | WSS1          | YMR284W                 | YKU70         |
| YBR200W                                          | BEM1          | YKR020W                 | VPS51         |
| YKR020W                                          | VPS51         | YAL002W                 | VPS8          |
| YNL076W                                          | MKS1          | YGL252C                 | RTG2          |
| YGL223C                                          | COG1          | YKR020W                 | VPS51         |
| YOR035C                                          | SHE4          | YHR114W                 | BZZ1          |
| YDR363W-A                                        | SEM1          | YOR038C                 | HIR2          |
| YHR150W                                          | PEX28         | YBR168W                 | PEX32         |
| YOR275C                                          | RIM20         | YDR264C                 | AKR1          |
| YDR329C                                          | PEX3          | YGL153W                 | PEX14         |
| YLR452C                                          | SST2          | YLR093C                 | NYV1          |
| YLR079W                                          | SIC1          | YGL019W                 | CKB1          |
| YHL031C                                          | GOS1          | YML071C                 | COG8          |
| YNL107W                                          | YAF9          | YPR119W                 | CLB2          |
| YLR093C                                          | NYV1          | YJR125C                 | ENT3          |
| YOR080W                                          | DIA2          | YJL006C                 | CTK2          |
| YNL307C                                          | MCK1          | YMR311C                 | GLC8          |
| YJR063W                                          | RPA12         | YNL030W                 | HHF2          |
| YML001W                                          | YPT7          | YDL077C                 | VAM6          |
| YNR023W                                          | SNF12         | YDR073W                 | SNF11         |
| YIL034C                                          | CAP2          | YDL226C                 | GCS1          |
| YKR099W                                          | BAS1          | YBL025W                 | RRN10         |
| YLR441C                                          | RPS1A         | YLR180W                 | SAM1          |
| YDL185W                                          | TFP1          | YEL051W                 | VMA8          |
| YKL007W                                          | CAP1          | YNL293W                 | MSB3          |

| Predictions at threshold level 0.85 continued... |               |                         |               |
|--------------------------------------------------|---------------|-------------------------|---------------|
| Gene1 of predicted pair                          |               | Gene2 of predicted pair |               |
| Systematic Name                                  | Standard Name | Systematic Name         | Standard Name |
| YDL042C                                          | SIR2          | YML109W                 | ZDS2          |
| YKL117W                                          | SBA1          | YGR059W                 | SPR3          |
| YHR200W                                          | RPN10         | YPL018W                 | CTF19         |
| YGL078C                                          | DBP3          | YNL076W                 | MKS1          |
| YDL160C                                          | DHH1          | YLR079W                 | SIC1          |
| YDR439W                                          | LRS4          | YPR120C                 | CLB5          |
| YPR120C                                          | CLB5          | YDR310C                 | SUM1          |
| YGL033W                                          | HOP2          | YOL111C                 | MDY2          |
| YCR077C                                          | PAT1          | YNL147W                 | LSM7          |
| YBR171W                                          | SEC66         | YPL195W                 | APL5          |
| YNL248C                                          | RPA49         | YJR063W                 | RPA12         |
| YHR134W                                          | WSS1          | YDL013W                 | SLX5          |
| YOR132W                                          | VPS17         | YHR114W                 | BZZ1          |
| YDL042C                                          | SIR2          | YDR440W                 | DOT1          |
| YDR202C                                          | RAV2          | YJR033C                 | RAV1          |
| YCL067C                                          | HMLALPHA2     | YBR112C                 | CYC8          |
| YHL022C                                          | SPO11         | YGL213C                 | SKI8          |
| YPR046W                                          | MCM16         | YDR318W                 | MCM21         |
| YDL184C                                          | RPL41A        | YML001W                 | YPT7          |
| YHR156C                                          | LIN1          | YNL076W                 | MKS1          |
| YIL076W                                          | SEC28         | YOR327C                 | SNC2          |
| YPR017C                                          | DSS4          | YHL031C                 | GOS1          |
| YCL032W                                          | STE50         | YER118C                 | SHO1          |
| YLR386W                                          | VAC14         | YGR270W                 | YTA7          |
| YGR105W                                          | VMA21         | YML071C                 | COG8          |
| YPR051W                                          | MAK3          | YEL053C                 | MAK10         |
| YJL172W                                          | CPS1          | YDR137W                 | RGP1          |
| YOR304W                                          | ISW2          | YMR139W                 | RIM11         |
| YPL161C                                          | BEM4          | YDR183W                 | PLP1          |

| Predictions at threshold level 0.85 continued... |               |                         |               |
|--------------------------------------------------|---------------|-------------------------|---------------|
| Gene1 of predicted pair                          |               | Gene2 of predicted pair |               |
| Systematic Name                                  | Standard Name | Systematic Name         | Standard Name |
| YGL135W                                          | RPL1B         | YOR080W                 | DIA2          |
| YBR041W                                          | FAT1          | YJL052W                 | TDH1          |
| YCR063W                                          | BUD31         | YPR101W                 | SNT309        |
| YBR108W                                          | YBR108W       | YJR090C                 | GRR1          |
| YNL243W                                          | SLA2          | YNL094W                 | APP1          |
| YPR189W                                          | SKI3          | YGL213C                 | SKI8          |
| YDR137W                                          | RGP1          | YNL044W                 | YIP3          |
| YIL076W                                          | SEC28         | YML071C                 | COG8          |
| YDR195W                                          | REF2          | YAR014C                 | BUD14         |
| YDR358W                                          | GGA1          | YER122C                 | GLO3          |
| YGR261C                                          | APL6          | YDR153C                 | ENT5          |
| YJL030W                                          | MAD2          | YIL033C                 | BCY1          |
| YIL159W                                          | BNR1          | YPL195W                 | APL5          |
| YKL129C                                          | MYO3          | YBR260C                 | RGD1          |
| YOR035C                                          | SHE4          | YJL095W                 | BCK1          |
| YBR173C                                          | UMP1          | YPR119W                 | CLB2          |
| YPR017C                                          | DSS4          | YPR032W                 | SRO7          |
| YLR399C                                          | BDF1          | YBR010W                 | HHT1          |
| YDR289C                                          | RTT103        | YBR114W                 | RAD16         |
| YKR014C                                          | YPT52         | YML097C                 | VPS9          |
| YMR095C                                          | SNO1          | YOR043W                 | WHI2          |
| YNL206C                                          | RTT106        | YBR009C                 | HHF1          |
| YGR040W                                          | KSS1          | YBL016W                 | FUS3          |
| YGL178W                                          | MPT5          | YML041C                 | VPS71         |
| YLR396C                                          | VPS33         | YDR323C                 | PEP7          |
| YCR020W-B                                        | HTL1          | YGR275W                 | RTT102        |
| YKR059W                                          | TIF1          | YJL138C                 | TIF2          |
| YPR017C                                          | DSS4          | YNL051W                 | COG5          |
| YIL076W                                          | SEC28         | YJR040W                 | GEF1          |

| Predictions at threshold level 0.85 continued... |               |                         |               |
|--------------------------------------------------|---------------|-------------------------|---------------|
| Gene1 of predicted pair                          |               | Gene2 of predicted pair |               |
| Systematic Name                                  | Standard Name | Systematic Name         | Standard Name |
| YOR132W                                          | VPS17         | YKL119C                 | VPH2          |
| YBR107C                                          | IML3          | YLR315W                 | NKP2          |
| YBR260C                                          | RGD1          | YHR012W                 | VPS29         |
| YBR278W                                          | DPB3          | YDR310C                 | SUM1          |
| YBR228W                                          | SLX1          | YLR135W                 | SLX4          |
| YDL042C                                          | SIR2          | YNL206C                 | RTT106        |
| YPL042C                                          | SSN3          | YGL115W                 | SNF4          |
| YFR031C-A                                        | RPL2A         | YDR137W                 | RGP1          |
| YNL180C                                          | RHO5          | YFL047W                 | RGD2          |
| YGL237C                                          | HAP2          | YGL253W                 | HXK2          |
| YPL240C                                          | HSP82         | YER102W                 | RPS8B         |
| YGL115W                                          | SNF4          | YER162C                 | RAD4          |
| YJL124C                                          | LSM1          | YEL013W                 | VAC8          |
| YJR135C                                          | MCM22         | YDR310C                 | SUM1          |
| YPR036W                                          | VMA13         | YLR180W                 | SAM1          |
| YLR006C                                          | SSK1          | YJL187C                 | SWE1          |
| YDR137W                                          | RGP1          | YGR071C                 | YGR071C       |
| YML057W                                          | CMP2          | YPR119W                 | CLB2          |
| YHR161C                                          | YAP1801       | YJL029C                 | VPS53         |
| YLR234W                                          | TOP3          | YCR066W                 | RAD18         |
| YJR058C                                          | APS2          | YDR358W                 | GGA1          |
| YNL238W                                          | KEX2          | YJL183W                 | MNN11         |
| YDR227W                                          | SIR4          | YBR010W                 | HHT1          |
| YNL031C                                          | HHT2          | YNL030W                 | HHF2          |
| YPR120C                                          | CLB5          | YDR183W                 | PLP1          |
| YAL024C                                          | LTE1          | YLR452C                 | SST2          |
| YLR148W                                          | PEP3          | YLR093C                 | NYV1          |
| YBR010W                                          | HHT1          | YNL107W                 | YAF9          |
| YHR073W                                          | OSH3          | YMR164C                 | MSS11         |

| Predictions at threshold level 0.85 continued... |               |                         |               |
|--------------------------------------------------|---------------|-------------------------|---------------|
| Gene1 of predicted pair                          |               | Gene2 of predicted pair |               |
| Systematic Name                                  | Standard Name | Systematic Name         | Standard Name |
| YPL195W                                          | APL5          | YBR036C                 | CSG2          |
| YBR200W                                          | BEM1          | YNL166C                 | BNI5          |
| YBR107C                                          | IML3          | YJR135C                 | MCM22         |
| YKL110C                                          | KTI12         | YDR289C                 | RTT103        |
| YJR010C-A                                        | SPC1          | YER019C-A               | SBH2          |
| YLR301W                                          | YLR301W       | YBR171W                 | SEC66         |
| YHR084W                                          | STE12         | YER109C                 | FLO8          |
| YNL166C                                          | BNI5          | YAL002W                 | VPS8          |
| YHR203C                                          | RPS4B         | YBL072C                 | RPS8A         |
| YLR135W                                          | SLX4          | YGL175C                 | SAE2          |
| YOR033C                                          | EXO1          | YBR215W                 | HPC2          |
| YGR104C                                          | SRB5          | YJL140W                 | RPB4          |
| YCR081W                                          | SRB8          | YDR477W                 | SNF1          |
| YLR170C                                          | APS1          | YOR035C                 | SHE4          |
| YOR197W                                          | MCA1          | YLL017W                 | YLL017W       |
| YDR202C                                          | RAV2          | YLR447C                 | VMA6          |
| YGR104C                                          | SRB5          | YCR081W                 | SRB8          |
| YJR063W                                          | RPA12         | YCR086W                 | CSM1          |
| YKR099W                                          | BAS1          | YDR358W                 | GGA1          |
| YLR240W                                          | VPS34         | YOR035C                 | SHE4          |
| YOR033C                                          | EXO1          | YMR116C                 | ASC1          |
| YDL116W                                          | NUP84         | YPR120C                 | CLB5          |
| YBR030W                                          | YBR030W       | YML115C                 | VAN1          |
| YDR146C                                          | SWI5          | YDL155W                 | CLB3          |
| YBR009C                                          | HHF1          | YEL056W                 | HAT2          |
| YNL166C                                          | BNI5          | YHL002W                 | HSE1          |
| YHR178W                                          | STB5          | YNL166C                 | BNI5          |
| YKR059W                                          | TIF1          | YOL045W                 | PSK2          |
| YBR112C                                          | CYC8          | YGR252W                 | GCN5          |

| Predictions at threshold level 0.85 continued... |               |                         |               |
|--------------------------------------------------|---------------|-------------------------|---------------|
| Gene1 of predicted pair                          |               | Gene2 of predicted pair |               |
| Systematic Name                                  | Standard Name | Systematic Name         | Standard Name |
| YNL093W                                          | YPT53         | YBR264C                 | YPT10         |
| YPR120C                                          | CLB5          | YJL157C                 | FAR1          |
| YDR293C                                          | SSD1          | YNL135C                 | FPR1          |
| YGR072W                                          | UPF3          | YPL079W                 | RPL21B        |
| YHR086W                                          | NAM8          | YMR133W                 | REC114        |
| YDL160C                                          | DHH1          | YGR054W                 | YGR054W       |
| YLR018C                                          | POM34         | YML115C                 | VAN1          |
| YOR039W                                          | CKB2          | YGL019W                 | CKB1          |
| YOR290C                                          | SNF2          | YJR063W                 | RPA12         |
| YAL014C                                          | SYN8          | YLR093C                 | NYV1          |
| YDR443C                                          | SSN2          | YKL048C                 | ELM1          |
| YPR131C                                          | NAT3          | YBR107C                 | IML3          |
| YGR184C                                          | UBR1          | YPL248C                 | GAL4          |
| YOR351C                                          | MEK1          | YLR263W                 | RED1          |
| YFR010W                                          | UBP6          | YOL051W                 | GAL11         |
| YHR073W                                          | OSH3          | YER115C                 | SPR6          |
| YOR290C                                          | SNF2          | YNR023W                 | SNF12         |
| YOR035C                                          | SHE4          | YBR082C                 | UBC4          |
| YCL001W                                          | RER1          | YML071C                 | COG8          |
| YMR231W                                          | PEP5          | YPL045W                 | VPS16         |
| YDL101C                                          | DUN1          | YLR313C                 | SPH1          |
| YHR200W                                          | RPN10         | YBR082C                 | UBC4          |
| YBR188C                                          | NTC20         | YIR009W                 | MSL1          |
| YPR018W                                          | RLF2          | YOR195W                 | SLK19         |
| YPL018W                                          | CTF19         | YPR119W                 | CLB2          |
| YGL190C                                          | CDC55         | YLR200W                 | YKE2          |
| YDL116W                                          | NUP84         | YDR174W                 | HMO1          |
| YPR084W                                          | YPR084W       | YOR124C                 | UBP2          |
| YDR244W                                          | PEX5          | YGR077C                 | PEX8          |

| Predictions at threshold level 0.85 continued... |               |                         |               |
|--------------------------------------------------|---------------|-------------------------|---------------|
| Gene1 of predicted pair                          |               | Gene2 of predicted pair |               |
| Systematic Name                                  | Standard Name | Systematic Name         | Standard Name |
| YPL253C                                          | VIK1          | YPR120C                 | CLB5          |
| YGL115W                                          | SNF4          | YDR422C                 | SIP1          |
| YOR080W                                          | DIA2          | YBR082C                 | UBC4          |
| YHL031C                                          | GOS1          | YAL002W                 | VPS8          |
| YDR385W                                          | EFT2          | YDR137W                 | RGP1          |
| YEL005C                                          | VAB2          | YEL013W                 | VAC8          |
| YDL226C                                          | GCS1          | YDL137W                 | ARF2          |
| YDL184C                                          | RPL41A        | YJL095W                 | BCK1          |
| YNL307C                                          | MCK1          | YGL003C                 | CDH1          |
| YPR028W                                          | YOP1          | YGL198W                 | YIP4          |
| YFR030W                                          | MET10         | YGR262C                 | BUD32         |
| YBR200W                                          | BEM1          | YBR215W                 | HPC2          |
| YHR156C                                          | LIN1          | YJL183W                 | MNN11         |
| YDL065C                                          | PEX19         | YOL044W                 | PEX15         |
| YMR109W                                          | MYO5          | YJR090C                 | GRR1          |
| YER075C                                          | PTP3          | YER089C                 | PTC2          |
| YOR327C                                          | SNC2          | YKR030W                 | GMH1          |
| YOR033C                                          | EXO1          | YNL076W                 | MKS1          |
| YMR224C                                          | MRE11         | YNL291C                 | MID1          |
| YFR024C-A                                        | LSB3          | YPR119W                 | CLB2          |
| YIL076W                                          | SEC28         | YKR020W                 | VPS51         |
| YJR052W                                          | RAD7          | YBR114W                 | RAD16         |
| YJR135C                                          | MCM22         | YDR318W                 | MCM21         |
| YCR002C                                          | CDC10         | YDR309C                 | GIC2          |
| YBR194W                                          | SOY1          | YKL114C                 | APN1          |
| YLR360W                                          | VPS38         | YBL051C                 | PIN4          |
| YDR129C                                          | SAC6          | YDL161W                 | ENT1          |
| YOR018W                                          | ROD1          | YLR248W                 | RCK2          |
| YFL003C                                          | MSH4          | YPR119W                 | CLB2          |

| Predictions at threshold level 0.85 continued... |               |                         |               |
|--------------------------------------------------|---------------|-------------------------|---------------|
| Gene1 of predicted pair                          |               | Gene2 of predicted pair |               |
| Systematic Name                                  | Standard Name | Systematic Name         | Standard Name |
| YML109W                                          | ZDS2          | YDR309C                 | GIC2          |
| YDR496C                                          | PUF6          | YHR052W                 | CIC1          |
| YMR231W                                          | PEP5          | YDL226C                 | GCS1          |
| YDR156W                                          | RPA14         | YDR335W                 | MSN5          |
| YML016C                                          | PPZ1          | YNL147W                 | LSM7          |
| YBL025W                                          | RRN10         | YLR398C                 | SKI2          |
| YML121W                                          | GTR1          | YKR007W                 | MEH1          |
| YKL213C                                          | DOA1          | YER122C                 | GLO3          |
| YDR004W                                          | RAD57         | YMR224C                 | MRE11         |
| YPL024W                                          | RMI1          | YBR215W                 | HPC2          |
| YDR363W-A                                        | SEM1          | YOR312C                 | RPL20B        |
| YGL174W                                          | BUD13         | YDR378C                 | LSM6          |
| YOR132W                                          | VPS17         | YHR060W                 | VMA22         |
| YJL127C                                          | SPT10         | YPL018W                 | CTF19         |
| YBR171W                                          | SEC66         | YDL006W                 | PTC1          |
| YGR217W                                          | CCH1          | YBR041W                 | FAT1          |
| YPR032W                                          | SRO7          | YAL002W                 | VPS8          |
| YLR386W                                          | VAC14         | YER122C                 | GLO3          |
| YKL119C                                          | VPH2          | YKL041W                 | VPS24         |
| YDR225W                                          | HTA1          | YPL129W                 | TAF14         |
| YMR109W                                          | MYO5          | YER118C                 | SHO1          |
| YAL024C                                          | LTE1          | YGL003C                 | CDH1          |
| YHR079C                                          | IRE1          | YOL031C                 | SIL1          |
| YPL024W                                          | RMI1          | YKR099W                 | BAS1          |
| YDR378C                                          | LSM6          | YPL213W                 | LEA1          |
| YGL033W                                          | HOP2          | YPL037C                 | EGD1          |
| YER044C                                          | ERG28         | YKR035W-A               | DID2          |
| YDR320C                                          | SWA2          | YPR119W                 | CLB2          |
| YMR139W                                          | RIM11         | YDR207C                 | UME6          |



| Predictions at threshold level 0.85 continued... |               |                         |               |
|--------------------------------------------------|---------------|-------------------------|---------------|
| Gene1 of predicted pair                          |               | Gene2 of predicted pair |               |
| Systematic Name                                  | Standard Name | Systematic Name         | Standard Name |
| YDR395W                                          | SXM1          | YER110C                 | KAP123        |
| YML115C                                          | VAN1          | YER044C                 | ERG28         |
| YOR276W                                          | CAF20         | YOL045W                 | PSK2          |
| YPR131C                                          | NAT3          | YKL114C                 | APN1          |
| YDR156W                                          | RPA14         | YML103C                 | NUP188        |
| YPL046C                                          | ELC1          | YGL115W                 | SNF4          |
| YKL213C                                          | DOA1          | YHL002W                 | HSE1          |
| YHR160C                                          | PEX18         | YNL214W                 | PEX17         |
| YDR383C                                          | NKP1          | YJR060W                 | CBF1          |
| YDR181C                                          | SAS4          | YMR127C                 | SAS2          |
| YML103C                                          | NUP188        | YGR270W                 | YTA7          |
| YMR142C                                          | RPL13B        | YKR035W-A               | DID2          |
| YDL047W                                          | SIT4          | YKL114C                 | APN1          |
| YBR171W                                          | SEC66         | YJL183W                 | MNN11         |
| YPL240C                                          | HSP82         | YBR089C-A               | NHP6B         |
| YPR120C                                          | CLB5          | YOR368W                 | RAD17         |
| YDR129C                                          | SAC6          | YLR371W                 | ROM2          |
| YPR018W                                          | RLF2          | YLR102C                 | APC9          |
| YBL008W                                          | HIR1          | YDL042C                 | SIR2          |
| YCL067C                                          | HMLALPHA2     | YCR039C                 | MATALPHA2     |
| YMR179W                                          | SPT21         | YPL253C                 | VIK1          |
| YOR080W                                          | DIA2          | YDL002C                 | NHP10         |
| YNL079C                                          | TPM1          | YGL019W                 | CKB1          |
| YMR004W                                          | MVP1          | YOL018C                 | TLG2          |
| YDR254W                                          | CHL4          | YPR119W                 | CLB2          |
| YER179W                                          | DMC1          | YBR073W                 | RDH54         |
| YBR289W                                          | SNF5          | YKL109W                 | HAP4          |
| YMR153W                                          | NUP53         | YGL003C                 | CDH1          |
| YPL046C                                          | ELC1          | YOR028C                 | CIN5          |

| Predictions at threshold level 0.85 continued... |               |                         |               |
|--------------------------------------------------|---------------|-------------------------|---------------|
| Gene1 of predicted pair                          |               | Gene2 of predicted pair |               |
| Systematic Name                                  | Standard Name | Systematic Name         | Standard Name |
| YIL159W                                          | BNR1          | YNL058C                 | YNL058C       |
| YJL036W                                          | SNX4          | YOR109W                 | INP53         |
| YOR195W                                          | SLK19         | YPR120C                 | CLB5          |
| YDL155W                                          | CLB3          | YOL067C                 | RTG1          |
| YGR252W                                          | GCN5          | YHR200W                 | RPN10         |
| YBR009C                                          | HHF1          | YOR141C                 | ARP8          |
| YDR176W                                          | NGG1          | YJL140W                 | RPB4          |
| YLR386W                                          | VAC14         | YER162C                 | RAD4          |
| YDL184C                                          | RPL41A        | YER040W                 | GLN3          |
| YHR060W                                          | VMA22         | YAL002W                 | VPS8          |
| YPL046C                                          | ELC1          | YER059W                 | PCL6          |
| YOR106W                                          | VAM3          | YOL018C                 | TLG2          |
| YMR273C                                          | ZDS1          | YBR009C                 | HHF1          |
| YBR200W                                          | BEM1          | YJL187C                 | SWE1          |
| YKR035W-A                                        | DID2          | YPL195W                 | APL5          |
| YER116C                                          | SLX8          | YDR076W                 | RAD55         |
| YBR127C                                          | VMA2          | YKL080W                 | VMA5          |
| YLR083C                                          | EMP70         | YDR202C                 | RAV2          |
| YOR080W                                          | DIA2          | YLR350W                 | ORM2          |
| YLR386W                                          | VAC14         | YDR289C                 | RTT103        |
| YER115C                                          | SPR6          | YNL199C                 | GCR2          |
| YLR386W                                          | VAC14         | YJL172W                 | CPS1          |
| YBL103C                                          | RTG3          | YOL108C                 | INO4          |
| YHR012W                                          | VPS29         | YKR030W                 | GMH1          |
| YML095C                                          | RAD10         | YPR119W                 | CLB2          |
| YGR104C                                          | SRB5          | YPL042C                 | SSN3          |
| YLR006C                                          | SSK1          | YNR031C                 | SSK2          |
| YLR441C                                          | RPS1A         | YDL083C                 | RPS16B        |
| YER114C                                          | BOI2          | YBL085W                 | BOI1          |

| Predictions at threshold level 0.85 continued... |               |                         |               |
|--------------------------------------------------|---------------|-------------------------|---------------|
| Gene1 of predicted pair                          |               | Gene2 of predicted pair |               |
| Systematic Name                                  | Standard Name | Systematic Name         | Standard Name |
| YPR018W                                          | RLF2          | YLR032W                 | RAD5          |
| YLR360W                                          | VPS38         | YHR060W                 | VMA22         |
| YBR195C                                          | MSI1          | YNL183C                 | NPR1          |
| YOR145C                                          | PNO1          | YHR081W                 | LRP1          |
| YHR200W                                          | RPN10         | YFL007W                 | BLM10         |
| YDL185W                                          | TFP1          | YKL080W                 | VMA5          |
| YLR148W                                          | PEP3          | YOR036W                 | PEP12         |
| YNL236W                                          | SIN4          | YOR141C                 | ARP8          |
| YBL008W                                          | HIR1          | YPR046W                 | MCM16         |
| YPR101W                                          | SNT309        | YBR114W                 | RAD16         |
| YPL045W                                          | VPS16         | YAL002W                 | VPS8          |
| YGL025C                                          | PGD1          | YHR200W                 | RPN10         |
| YBR041W                                          | FAT1          | YJL183W                 | MNN11         |
| YNL243W                                          | SLA2          | YIL002C                 | INP51         |
| YML016C                                          | PPZ1          | YHR108W                 | GGA2          |
| YBR200W                                          | BEM1          | YOR212W                 | STE4          |
| YNL020C                                          | ARK1          | YCR088W                 | ABP1          |
| YOR112W                                          | CEX1          | YDL006W                 | PTC1          |
| YLR386W                                          | VAC14         | YOR043W                 | WHI2          |
| YJL053W                                          | PEP8          | YHR060W                 | VMA22         |
| YHR134W                                          | WSS1          | YLR386W                 | VAC14         |
| YDL077C                                          | VAM6          | YAL002W                 | VPS8          |
| YJL172W                                          | CPS1          | YEL060C                 | PRB1          |
| YBR112C                                          | CYC8          | YNL167C                 | SKO1          |
| YOL090W                                          | MSH2          | YOR368W                 | RAD17         |
| YJL129C                                          | TRK1          | YGR262C                 | BUD32         |
| YOR127W                                          | RGA1          | YPL256C                 | CLN2          |
| YLR386W                                          | VAC14         | YNL079C                 | TPM1          |
| YDR507C                                          | GIN4          | YDR379W                 | RGA2          |

| Predictions at threshold level 0.85 continued... |               |                         |               |
|--------------------------------------------------|---------------|-------------------------|---------------|
| Gene1 of predicted pair                          |               | Gene2 of predicted pair |               |
| Systematic Name                                  | Standard Name | Systematic Name         | Standard Name |
| YGL054C                                          | ERV14         | YLR309C                 | IMH1          |
| YMR179W                                          | SPT21         | YJL124C                 | LSM1          |
| YGR159C                                          | NSR1          | YPL161C                 | BEM4          |
| YIL053W                                          | RHR2          | YDR137W                 | RGP1          |
| YDL020C                                          | RPN4          | YBR108W                 | YBR108W       |
| YNR052C                                          | POP2          | YJL141C                 | YAK1          |
| YDL160C                                          | DHH1          | YJL124C                 | LSM1          |
| YPL234C                                          | TFP3          | YML001W                 | YPT7          |
| YHR203C                                          | RPS4B         | YER102W                 | RPS8B         |
| YBR289W                                          | SNF5          | YNL236W                 | SIN4          |
| YDL184C                                          | RPL41A        | YEL060C                 | PRB1          |
| YLR148W                                          | PEP3          | YKR001C                 | VPS1          |
| YGR188C                                          | BUB1          | YDR310C                 | SUM1          |
| YHR013C                                          | ARD1          | YAL002W                 | VPS8          |
| YBR131W                                          | CCZ1          | YOR275C                 | RIM20         |
| YMR052W                                          | FAR3          | YPR119W                 | CLB2          |
| YNL068C                                          | FKH2          | YOR127W                 | RGA1          |
| YDR225W                                          | HTA1          | YDR448W                 | ADA2          |
| YGR270W                                          | YTA7          | YDL155W                 | CLB3          |
| YLR170C                                          | APS1          | YJR058C                 | APS2          |
| YLR386W                                          | VAC14         | YBR171W                 | SEC66         |
| YLR360W                                          | VPS38         | YIL076W                 | SEC28         |
| YDR153C                                          | ENT5          | YER122C                 | GLO3          |
| YNL031C                                          | HHT2          | YOR141C                 | ARP8          |
| YPL024W                                          | RMI1          | YHR156C                 | LIN1          |
| YML001W                                          | YPT7          | YBL025W                 | RRN10         |
| YKL057C                                          | NUP120        | YER105C                 | NUP157        |
| YJR060W                                          | CBF1          | YJR135C                 | MCM22         |
| YEL009C                                          | GCN4          | YOL051W                 | GAL11         |

| Predictions at threshold level 0.85 continued... |               |                         |               |
|--------------------------------------------------|---------------|-------------------------|---------------|
| Gene1 of predicted pair                          |               | Gene2 of predicted pair |               |
| Systematic Name                                  | Standard Name | Systematic Name         | Standard Name |
| YMR224C                                          | MRE11         | YDR076W                 | RAD55         |
| YLR191W                                          | PEX13         | YAR042W                 | SWH1          |
| YJL127C                                          | SPT10         | YDR200C                 | VPS64         |
| YJL124C                                          | LSM1          | YPL057C                 | SUR1          |
| YHR016C                                          | YSC84         | YKR030W                 | GMH1          |
| YNL330C                                          | RPD3          | YBR089C-A               | NHP6B         |
| YEL027W                                          | CUP5          | YDL185W                 | TFP1          |
| YJL006C                                          | CTK2          | YCR086W                 | CSM1          |
| YDL155W                                          | CLB3          | YOR014W                 | RTS1          |
| YBR264C                                          | YPT10         | YKR014C                 | YPT52         |
| YHR178W                                          | STB5          | YER161C                 | SPT2          |
| YLR315W                                          | NKP2          | YGR188C                 | BUB1          |
| YDR335W                                          | MSN5          | YKL068W                 | NUP100        |
| YOR039W                                          | CKB2          | YNL030W                 | HHF2          |
| YJL151C                                          | SNA3          | YNL094W                 | APP1          |
| YDR363W-A                                        | SEM1          | YPR046W                 | MCM16         |
| YOR039W                                          | CKB2          | YLR399C                 | BDF1          |
| YMR095C                                          | SNO1          | YER122C                 | GLO3          |
| YPR120C                                          | CLB5          | YPL152W                 | RRD2          |
| YBR290W                                          | BSD2          | YGL124C                 | MON1          |
| YDR080W                                          | VPS41         | YDL077C                 | VAM6          |
| YHR012W                                          | VPS29         | YER122C                 | GLO3          |
| YFL013C                                          | IES1          | YNL107W                 | YAF9          |
| YGL078C                                          | DBP3          | YGR159C                 | NSR1          |
| YPL024W                                          | RMI1          | YLR452C                 | SST2          |
| YEL051W                                          | VMA8          | YKL080W                 | VMA5          |
| YNL206C                                          | RTT106        | YBR010W                 | HHT1          |
| YNL199C                                          | GCR2          | YBR260C                 | RGD1          |
| YDR129C                                          | SAC6          | YOR036W                 | PEP12         |

| Predictions at threshold level 0.85 continued... |               |                         |               |
|--------------------------------------------------|---------------|-------------------------|---------------|
| Gene1 of predicted pair                          |               | Gene2 of predicted pair |               |
| Systematic Name                                  | Standard Name | Systematic Name         | Standard Name |
| YDR171W                                          | HSP42         | YGL003C                 | CDH1          |
| YBR017C                                          | KAP104        | YDR335W                 | MSN5          |
| YDR080W                                          | VPS41         | YMR231W                 | PEP5          |
| YDR225W                                          | HTA1          | YPL248C                 | GAL4          |
| YBR200W                                          | BEM1          | YGR134W                 | CAF130        |
| YLR423C                                          | ATG17         | YPR185W                 | ATG13         |
| YMR142C                                          | RPL13B        | YLR441C                 | RPS1A         |
| YAL042W                                          | ERV46         | YPR119W                 | CLB2          |
| YBR108W                                          | YBR108W       | YER122C                 | GLO3          |
| YGR209C                                          | TRX2          | YML028W                 | TSA1          |
| YPL057C                                          | SUR1          | YEL013W                 | VAC8          |
| YER001W                                          | MNN1          | YGL200C                 | EMP24         |
| YHR200W                                          | RPN10         | YPR120C                 | CLB5          |
| YIL034C                                          | CAP2          | YLR360W                 | VPS38         |
| YGL095C                                          | VPS45         | YDL226C                 | GCS1          |
| YLR102C                                          | APC9          | YDR260C                 | SWM1          |
| YBL021C                                          | HAP3          | YHR187W                 | IKI1          |
| YJL154C                                          | VPS35         | YKR030W                 | GMH1          |
| YGL066W                                          | SGF73         | YHR200W                 | RPN10         |
| YPL137C                                          | GIP3          | YMR311C                 | GLC8          |
| YHL031C                                          | GOS1          | YGL223C                 | COG1          |
| YOL051W                                          | GAL11         | YBR289W                 | SNF5          |
| YJR032W                                          | CPR7          | YDR289C                 | RTT103        |
| YBL051C                                          | PIN4          | YPR040W                 | TIP41         |
| YAL009W                                          | SPO7          | YMR165C                 | PAH1          |
| YNL243W                                          | SLA2          | YDR245W                 | MNN10         |
| YPL042C                                          | SSN3          | YPL106C                 | SSE1          |
| YPL057C                                          | SUR1          | YLR093C                 | NYV1          |
| YCR063W                                          | BUD31         | YJR050W                 | ISY1          |

| Predictions at threshold level 0.85 continued... |               |                         |               |
|--------------------------------------------------|---------------|-------------------------|---------------|
| Gene1 of predicted pair                          |               | Gene2 of predicted pair |               |
| Systematic Name                                  | Standard Name | Systematic Name         | Standard Name |
| YBR111W-A                                        | SUS1          | YHR167W                 | THP2          |
| YBL003C                                          | HTA2          | YGL241W                 | KAP114        |
| YBR112C                                          | CYC8          | YHL027W                 | RIM101        |
| YJL137C                                          | GLG2          | YLR273C                 | PIG1          |
| YPL115C                                          | BEM3          | YGL038C                 | OCH1          |
| YIL034C                                          | CAP2          | YHR114W                 | BZZ1          |
| YMR224C                                          | MRE11         | YGR184C                 | UBR1          |
| YER019C-A                                        | SBH2          | YGL226C-A               | OST5          |
| YDL116W                                          | NUP84         | YLR410W                 | VIP1          |
| YPL050C                                          | MNN9          | YPR154W                 | PIN3          |
| YML001W                                          | YPT7          | YOL018C                 | TLG2          |
| YJL029C                                          | VPS53         | YDL047W                 | SIT4          |
| YGR249W                                          | MGA1          | YBR200W                 | BEM1          |
| YBR108W                                          | YBR108W       | YMR055C                 | BUB2          |
| YDR383C                                          | NKP1          | YGR188C                 | BUB1          |
| YKL181W                                          | PRS1          | YHR030C                 | SLT2          |
| YMR179W                                          | SPT21         | YDL155W                 | CLB3          |
| YNL236W                                          | SIN4          | YPR119W                 | CLB2          |
| YDR477W                                          | SNF1          | YER040W                 | GLN3          |
| YJL127C                                          | SPT10         | YDR318W                 | MCM21         |
| YBR274W                                          | CHK1          | YCR077C                 | PAT1          |
| YAL024C                                          | LTE1          | YPL256C                 | CLN2          |
| YLR386W                                          | VAC14         | YMR311C                 | GLC8          |
| YBR009C                                          | HHF1          | YKR048C                 | NAP1          |
| YKL007W                                          | CAP1          | YER114C                 | BOI2          |
| YJR092W                                          | BUD4          | YPR122W                 | AXL1          |
| YJL172W                                          | CPS1          | YBL025W                 | RRN10         |
| YEL009C                                          | GCN4          | YDR448W                 | ADA2          |
| YDR254W                                          | CHL4          | YLR315W                 | NKP2          |

| Predictions at threshold level 0.85 continued... |               |                         |               |
|--------------------------------------------------|---------------|-------------------------|---------------|
| Gene1 of predicted pair                          |               | Gene2 of predicted pair |               |
| Systematic Name                                  | Standard Name | Systematic Name         | Standard Name |
| YDR176W                                          | NGG1          | YKR048C                 | NAP1          |
| YEL009C                                          | GCN4          | YOL148C                 | SPT20         |
| YOR270C                                          | VPH1          | YEL027W                 | CUP5          |
| YHR039C-A                                        | VMA10         | YDR261C                 | EXG2          |
| YEL059C-A                                        | SOM1          | YMR035W                 | IMP2          |
| YDL020C                                          | RPN4          | YOR023C                 | AHC1          |
| YML016C                                          | PPZ1          | YDL155W                 | CLB3          |
| YBR171W                                          | SEC66         | YLR093C                 | NYV1          |
| YDR174W                                          | HMO1          | YBR073W                 | RDH54         |
| YDR363W-A                                        | SEM1          | YGR232W                 | NAS6          |
| YMR224C                                          | MRE11         | YGR275W                 | RTT102        |
| YKL025C                                          | PAN3          | YBR274W                 | CHK1          |
| YLR018C                                          | POM34         | YGL016W                 | KAP122        |
| YJR060W                                          | CBF1          | YPR046W                 | MCM16         |
| YJL183W                                          | MNN11         | YER122C                 | GLO3          |
| YBR133C                                          | HSL7          | YJL187C                 | SWE1          |
| YGR184C                                          | UBR1          | YJR135C                 | MCM22         |
| YDR320C                                          | SWA2          | YNL238W                 | KEX2          |
| YNL264C                                          | PDR17         | YGL200C                 | EMP24         |
| YOR270C                                          | VPH1          | YMR054W                 | STV1          |
| YBR128C                                          | ATG14         | YPL120W                 | VPS30         |
| YPL050C                                          | MNN9          | YGL200C                 | EMP24         |
| YDL160C                                          | DHH1          | YCR077C                 | PAT1          |
| YML062C                                          | MFT1          | YHR081W                 | LRP1          |
| YMR026C                                          | PEX12         | YDR261C                 | EXG2          |
| YMR194W                                          | RPL36A        | YGL246C                 | RAI1          |
| YDR080W                                          | VPS41         | YML001W                 | YPT7          |
| YNL135C                                          | FPR1          | YNL023C                 | FAP1          |
| YDL232W                                          | OST4          | YEL036C                 | ANP1          |



| Predictions at threshold level 0.85 continued... |               |                         |               |
|--------------------------------------------------|---------------|-------------------------|---------------|
| Gene1 of predicted pair                          |               | Gene2 of predicted pair |               |
| Systematic Name                                  | Standard Name | Systematic Name         | Standard Name |
| YML115C                                          | VAN1          | YBR171W                 | SEC66         |
| YDR137W                                          | RGP1          | YML001W                 | YPT7          |
| YKL135C                                          | APL2          | YOR036W                 | PEP12         |
| YBR111W-A                                        | SUS1          | YOR001W                 | RRP6          |
| YGL223C                                          | COG1          | YAL002W                 | VPS8          |
| YBR200W                                          | BEM1          | YOL121C                 | RPS19A        |
| YDL116W                                          | NUP84         | YBL079W                 | NUP170        |
| YMR198W                                          | CIK1          | YER114C                 | BOI2          |
| YDR195W                                          | REF2          | YER032W                 | FIR1          |
| YLR432W                                          | IMD3          | YML056C                 | IMD4          |
| YPL042C                                          | SSN3          | YDR477W                 | SNF1          |
| YLL026W                                          | HSP104        | YGR275W                 | RTT102        |
| YML071C                                          | COG8          | YOR327C                 | SNC2          |
| YJR058C                                          | APS2          | YPL259C                 | APM1          |
| YDR080W                                          | VPS41         | YDL192W                 | ARF1          |
| YMR127C                                          | SAS2          | YOR213C                 | SAS5          |
| YIL148W                                          | RPL40A        | YPL178W                 | CBC2          |
| YDR101C                                          | ARX1          | YOR312C                 | RPL20B        |
| YPR046W                                          | MCM16         | YPL195W                 | APL5          |
| YKL139W                                          | CTK1          | YNL236W                 | SIN4          |
| YPR036W                                          | VMA13         | YKL080W                 | VMA5          |
| YML103C                                          | NUP188        | YLR386W                 | VAC14         |
| YDL101C                                          | DUN1          | YMR224C                 | MRE11         |
| YJL176C                                          | SWI3          | YPL129W                 | TAF14         |
| YLR043C                                          | TRX1          | YML028W                 | TSA1          |
| YJL172W                                          | CPS1          | YER122C                 | GLO3          |
| YML115C                                          | VAN1          | YDR484W                 | VPS52         |
| YBR217W                                          | ATG12         | YNR007C                 | ATG3          |
| YLR043C                                          | TRX1          | YPL195W                 | APL5          |

| Predictions at threshold level 0.85 continued... |               |                         |               |
|--------------------------------------------------|---------------|-------------------------|---------------|
| Gene1 of predicted pair                          |               | Gene2 of predicted pair |               |
| Systematic Name                                  | Standard Name | Systematic Name         | Standard Name |
| YKR001C                                          | VPS1          | YNL238W                 | KEX2          |
| YLR396C                                          | VPS33         | YDL226C                 | GCS1          |
| YEL022W                                          | GEA2          | YDL226C                 | GCS1          |
| YML097C                                          | VPS9          | YAL002W                 | VPS8          |
| YKL117W                                          | SBA1          | YMR125W                 | STO1          |
| YOR078W                                          | BUD21         | YHR203C                 | RPS4B         |
| YIR005W                                          | IST3          | YOR308C                 | SNU66         |
| YDR129C                                          | SAC6          | YBL067C                 | UBP13         |
| YOR078W                                          | BUD21         | YGR100W                 | MDR1          |
| YDR264C                                          | AKR1          | YKL178C                 | STE3          |
| YPL024W                                          | RMI1          | YGR184C                 | UBR1          |
| YNL214W                                          | PEX17         | YGR077C                 | PEX8          |
| YBR041W                                          | FAT1          | YKR020W                 | VPS51         |
| YBR009C                                          | HHF1          | YJL140W                 | RPB4          |
| YOR178C                                          | GAC1          | YLR258W                 | GSY2          |
| YEL013W                                          | VAC8          | YGR262C                 | BUD32         |
| YML016C                                          | PPZ1          | YJL138C                 | TIF2          |
| YHR084W                                          | STE12         | YPL042C                 | SSN3          |
| YML100W                                          | TSL1          | YMR261C                 | TPS3          |
| YLR109W                                          | AHP1          | YHR111W                 | UBA4          |
| YEL009C                                          | GCN4          | YKL109W                 | HAP4          |
| YBL003C                                          | HTA2          | YNL031C                 | HHT2          |
| YNL032W                                          | SIW14         | YEL060C                 | PRB1          |
| YGL066W                                          | SGF73         | YOL148C                 | SPT20         |
| YDR254W                                          | CHL4          | YGR188C                 | BUB1          |
| YIL053W                                          | RHR2          | YLR398C                 | SKI2          |
| YML001W                                          | YPT7          | YGL198W                 | YIP4          |
| YBL025W                                          | RRN10         | YBR280C                 | SAF1          |
| YNL307C                                          | MCK1          | YJR060W                 | CBF1          |

| Predictions at threshold level 0.85 continued... |               |                         |               |
|--------------------------------------------------|---------------|-------------------------|---------------|
| Gene1 of predicted pair                          |               | Gene2 of predicted pair |               |
| Systematic Name                                  | Standard Name | Systematic Name         | Standard Name |
| YLR381W                                          | CTF3          | YKL101W                 | HSL1          |
| YBR036C                                          | CSG2          | YBR161W                 | CSH1          |
| YBL078C                                          | ATG8          | YPL195W                 | APL5          |
| YIL002C                                          | INP51         | YJL004C                 | SYS1          |
| YNL243W                                          | SLA2          | YOR109W                 | INP53         |
| YLR441C                                          | RPS1A         | YMR311C                 | GLC8          |
| YML095C                                          | RAD10         | YGL175C                 | SAE2          |
| YBR131W                                          | CCZ1          | YKR001C                 | VPS1          |
| YMR231W                                          | PEP5          | YML028W                 | TSA1          |
| YCL010C                                          | SGF29         | YBR111W-A               | SUS1          |
| YHR052W                                          | CIC1          | YOL041C                 | NOP12         |
| YNL288W                                          | CAF40         | YBR200W                 | BEM1          |
| YBR194W                                          | SOY1          | YDR137W                 | RGP1          |
| YMR127C                                          | SAS2          | YOR038C                 | HIR2          |
| YLL007C                                          | YLL007C       | YNL166C                 | BNI5          |
| YDL185W                                          | TFP1          | YDR318W                 | MCM21         |
| YKL007W                                          | CAP1          | YDR309C                 | GIC2          |
| YDR192C                                          | NUP42         | YDR101C                 | ARX1          |
| YFR031C-A                                        | RPL2A         | YOR109W                 | INP53         |
| YIL076W                                          | SEC28         | YDR358W                 | GGA1          |
| YBR131W                                          | CCZ1          | YJL117W                 | PHO86         |
| YAL024C                                          | LTE1          | YGL161C                 | YIP5          |
| YGR040W                                          | KSS1          | YHR084W                 | STE12         |
| YNL041C                                          | COG6          | YER122C                 | GLO3          |
| YCR024C-A                                        | PMP1          | YKL117W                 | SBA1          |
| YOR332W                                          | VMA4          | YHR039C-A               | VMA10         |
| YOR033C                                          | EXO1          | YNL082W                 | PMS1          |
| YPR120C                                          | CLB5          | YKL101W                 | HSL1          |
| YHR134W                                          | WSS1          | YHR012W                 | VPS29         |

| Predictions at threshold level 0.85 continued... |               |                         |               |
|--------------------------------------------------|---------------|-------------------------|---------------|
| Gene1 of predicted pair                          |               | Gene2 of predicted pair |               |
| Systematic Name                                  | Standard Name | Systematic Name         | Standard Name |
| YOR156C                                          | NFI1          | YDR155C                 | CPR1          |
| YOR083W                                          | WHI5          | YDR335W                 | MSN5          |
| YPL129W                                          | TAF14         | YMR109W                 | MYO5          |
| YJL128C                                          | PBS2          | YER118C                 | SHO1          |
| YOR083W                                          | WHI5          | YGL003C                 | CDH1          |
| YDL116W                                          | NUP84         | YER110C                 | KAP123        |
| YAL024C                                          | LTE1          | YLR182W                 | SWI6          |
| YNL253W                                          | TEX1          | YNL004W                 | HRB1          |
| YML001W                                          | YPT7          | YAL002W                 | VPS8          |
| YCR020C-A                                        | MAK31         | YJL004C                 | SYS1          |
| YJL210W                                          | PEX2          | YDL065C                 | PEX19         |
| YLR135W                                          | SLX4          | YOL090W                 | MSH2          |
| YCL037C                                          | SRO9          | YOL045W                 | PSK2          |
| YLR148W                                          | PEP3          | YLR043C                 | TRX1          |
| YKR020W                                          | VPS51         | YDR323C                 | PEP7          |
| YOR043W                                          | WHI2          | YEL060C                 | PRB1          |
| YPL105C                                          | YPL105C       | YDL006W                 | PTC1          |
| YDR142C                                          | PEX7          | YNL214W                 | PEX17         |
| YNL314W                                          | DAL82         | YIR023W                 | DAL81         |
| YKL160W                                          | ELF1          | YOR308C                 | SNU66         |
| YNL243W                                          | SLA2          | YBR200W                 | BEM1          |
| YMR080C                                          | NAM7          | YLR135W                 | SLX4          |
| YPL180W                                          | TCO89         | YLR398C                 | SKI2          |
| YDR137W                                          | RGP1          | YNL297C                 | MON2          |
| YPL057C                                          | SUR1          | YML001W                 | YPT7          |
| YNL297C                                          | MON2          | YOR109W                 | INP53         |
| YGR072W                                          | UPF3          | YKR001C                 | VPS1          |
| YOR290C                                          | SNF2          | YDR469W                 | SDC1          |
| YOR080W                                          | DIA2          | YDR318W                 | MCM21         |

| Predictions at threshold level 0.85 continued... |               |                         |               |
|--------------------------------------------------|---------------|-------------------------|---------------|
| Gene1 of predicted pair                          |               | Gene2 of predicted pair |               |
| Systematic Name                                  | Standard Name | Systematic Name         | Standard Name |
| YPL042C                                          | SSN3          | YMR037C                 | MSN2          |
| YMR092C                                          | AIP1          | YDR389W                 | SAC7          |
| YDL059C                                          | RAD59         | YGL175C                 | SAE2          |
| YPL042C                                          | SSN3          | YGR252W                 | GCN5          |
| YML095C                                          | RAD10         | YMR201C                 | RAD14         |
| YJR056C                                          | YJR056C       | YML001W                 | YPT7          |
| YOR132W                                          | VPS17         | YER122C                 | GLO3          |
| YBL088C                                          | TEL1          | YML095C                 | RAD10         |
| YBR010W                                          | HHT1          | YLR357W                 | RSC2          |
| YDL161W                                          | ENT1          | YCR088W                 | ABP1          |
| YJL006C                                          | CTK2          | YNL079C                 | TPM1          |
| YDR507C                                          | GIN4          | YHR200W                 | RPN10         |
| YOR358W                                          | HAP5          | YKL109W                 | HAP4          |
| YEL065W                                          | SIT1          | YML001W                 | YPT7          |
| YPL024W                                          | RMI1          | YLR320W                 | MMS22         |
| YML001W                                          | YPT7          | YMR231W                 | PEP5          |
| YDR477W                                          | SNF1          | YNL199C                 | GCR2          |
| YJL006C                                          | CTK2          | YFR036W                 | CDC26         |
| YLL039C                                          | UBI4          | YER143W                 | DDI1          |
| YGL033W                                          | HOP2          | YFL023W                 | BUD27         |
| YOR038C                                          | HIR2          | YOR308C                 | SNU66         |
| YDR245W                                          | MNN10         | YKR020W                 | VPS51         |
| YBR107C                                          | IML3          | YDR260C                 | SWM1          |
| YOR033C                                          | EXO1          | YML062C                 | MFT1          |
| YCR066W                                          | RAD18         | YKL114C                 | APN1          |
| YNL031C                                          | HHT2          | YJR063W                 | RPA12         |
| YJL128C                                          | PBS2          | YCR073C                 | SSK22         |
| YLR018C                                          | POM34         | YNL199C                 | GCR2          |
| YGL212W                                          | VAM7          | YJR040W                 | GEF1          |

| Predictions at threshold level 0.85 continued... |               |                         |               |
|--------------------------------------------------|---------------|-------------------------|---------------|
| Gene1 of predicted pair                          |               | Gene2 of predicted pair |               |
| Systematic Name                                  | Standard Name | Systematic Name         | Standard Name |
| YHR052W                                          | CIC1          | YDR312W                 | SSF2          |
| YNL229C                                          | URE2          | YER040W                 | GLN3          |
| YDL216C                                          | RRI1          | YOL117W                 | RRI2          |
| YDR392W                                          | SPT3          | YBR111W-A               | SUS1          |
| YNR049C                                          | MSO1          | YPR032W                 | SRO7          |
| YJL154C                                          | VPS35         | YDL161W                 | ENT1          |
| YLR288C                                          | MEC3          | YOR368W                 | RAD17         |
| YDR329C                                          | PEX3          | YJL210W                 | PEX2          |
| YOL062C                                          | APM4          | YPL259C                 | APM1          |
| YLR181C                                          | VTA1          | YPR173C                 | VPS4          |
| YDR245W                                          | MNN10         | YEL013W                 | VAC8          |
| YKR020W                                          | VPS51         | YOL018C                 | TLG2          |
| YNL032W                                          | SIW14         | YGL115W                 | SNF4          |
| YNR023W                                          | SNF12         | YER161C                 | SPT2          |
| YHL031C                                          | GOS1          | YOR036W                 | PEP12         |
| YHR052W                                          | CIC1          | YKR057W                 | RPS21A        |
| YBR200W                                          | BEM1          | YKL129C                 | MYO3          |
| YOR290C                                          | SNF2          | YOR064C                 | YNG1          |
| YBR126C                                          | TPS1          | YFL033C                 | RIM15         |
| YKR001C                                          | VPS1          | YER120W                 | SCS2          |
| YJL006C                                          | CTK2          | YNL107W                 | YAF9          |
| YLR079W                                          | SIC1          | YMR164C                 | MSS11         |
| YPL115C                                          | BEM3          | YOR127W                 | RGA1          |
| YGL246C                                          | RAI1          | YIL133C                 | RPL16A        |
| YBL071W-A                                        | KTI11         | YOL121C                 | RPS19A        |
| YOR290C                                          | SNF2          | YLR180W                 | SAM1          |
| YDR137W                                          | RGP1          | YAL002W                 | VPS8          |
| YNL201C                                          | PSY2          | YLR410W                 | VIP1          |
| YOR156C                                          | NFI1          | YGL237C                 | HAP2          |

| Predictions at threshold level 0.85 continued... |               |                         |               |
|--------------------------------------------------|---------------|-------------------------|---------------|
| Gene1 of predicted pair                          |               | Gene2 of predicted pair |               |
| Systematic Name                                  | Standard Name | Systematic Name         | Standard Name |
| YOR191W                                          | RIS1          | YHR077C                 | NMD2          |
| YDR484W                                          | VPS52         | YOL018C                 | TLG2          |
| YPL195W                                          | APL5          | YOR327C                 | SNC2          |
| YOL117W                                          | RRI2          | YJR084W                 | CSN12         |
| YGR261C                                          | APL6          | YNL238W                 | KEX2          |
| YHR161C                                          | YAP1801       | YOR035C                 | SHE4          |
| YDL184C                                          | RPL41A        | YMR153W                 | NUP53         |
| YHL020C                                          | OPI1          | YER120W                 | SCS2          |
| YGR184C                                          | UBR1          | YLR032W                 | RAD5          |
| YOR132W                                          | VPS17         | YHR012W                 | VPS29         |
| YLR135W                                          | SLX4          | YGR071C                 | YGR071C       |
| YDR110W                                          | FOB1          | YBR119W                 | MUD1          |
| YDR004W                                          | RAD57         | YLR234W                 | TOP3          |
| YLR386W                                          | VAC14         | YNL307C                 | MCK1          |
| YPL057C                                          | SUR1          | YAL002W                 | VPS8          |
| YPL213W                                          | LEA1          | YJL006C                 | CTK2          |
| YOL051W                                          | GAL11         | YCR084C                 | TUP1          |
| YPL057C                                          | SUR1          | YNL238W                 | KEX2          |
| YGR142W                                          | BTN2          | YER074W-A               | YOS1          |
| YPL129W                                          | TAF14         | YEL044W                 | IES6          |
| YBR111W-A                                        | SUS1          | YPL248C                 | GAL4          |
| YBL021C                                          | HAP3          | YOR358W                 | HAP5          |
| YDR335W                                          | MSN5          | YER105C                 | NUP157        |
| YJL157C                                          | FAR1          | YJL187C                 | SWE1          |
| YPL121C                                          | MEI5          | YHR079C-A               | SAE3          |
| YDR378C                                          | LSM6          | YGR135W                 | PRE9          |
| YMR179W                                          | SPT21         | YLR429W                 | CRN1          |
| YJR125C                                          | ENT3          | YNR006W                 | VPS27         |
| YNL243W                                          | SLA2          | YIL034C                 | CAP2          |

| Predictions at threshold level 0.85 continued... |               |                         |               |
|--------------------------------------------------|---------------|-------------------------|---------------|
| Gene1 of predicted pair                          |               | Gene2 of predicted pair |               |
| Systematic Name                                  | Standard Name | Systematic Name         | Standard Name |
| YLR254C                                          | NDL1          | YML112W                 | CTK3          |
| YFR043C                                          | IRC6          | YLR248W                 | RCK2          |
| YFL003C                                          | MSH4          | YDL154W                 | MSH5          |
| YDR146C                                          | SWI5          | YOL051W                 | GAL11         |
| YJR058C                                          | APS2          | YOR035C                 | SHE4          |
| YCR084C                                          | TUP1          | YKL181W                 | PRS1          |
| YBR228W                                          | SLX1          | YPL079W                 | RPL21B        |
| YDR192C                                          | NUP42         | YBL079W                 | NUP170        |
| YDR507C                                          | GIN4          | YBR267W                 | REI1          |
| YDR146C                                          | SWI5          | YOR014W                 | RTS1          |
| YOR195W                                          | SLK19         | YDL226C                 | GCS1          |
| YLR170C                                          | APS1          | YPR029C                 | APL4          |
| YAL024C                                          | LTE1          | YGR270W                 | YTA7          |
| YER158C                                          | YER158C       | YAR014C                 | BUD14         |
| YML115C                                          | VAN1          | YDL192W                 | ARF1          |
| YCR034W                                          | FEN1          | YMR167W                 | MLH1          |
| YPL046C                                          | ELC1          | YJR052W                 | RAD7          |
| YDR137W                                          | RGP1          | YKL160W                 | ELF1          |
| YGL003C                                          | CDH1          | YDL226C                 | GCS1          |
| YDR156W                                          | RPA14         | YNL307C                 | MCK1          |
| YPL105C                                          | YPL105C       | YJL004C                 | SYS1          |
| YBL088C                                          | TEL1          | YJL106W                 | IME2          |
| YHR061C                                          | GIC1          | YCR086W                 | CSM1          |
| YIL076W                                          | SEC28         | YHR200W                 | RPN10         |
| YLR324W                                          | PEX30         | YMR204C                 | INP1          |
| YLR381W                                          | CTF3          | YJL183W                 | MNN11         |
| YER143W                                          | DDI1          | YOL018C                 | TLG2          |
| YDR329C                                          | PEX3          | YDR265W                 | PEX10         |
| YMR198W                                          | CIK1          | YDR254W                 | CHL4          |



| Predictions at threshold level 0.85 continued... |               |                         |               |
|--------------------------------------------------|---------------|-------------------------|---------------|
| Gene1 of predicted pair                          |               | Gene2 of predicted pair |               |
| Systematic Name                                  | Standard Name | Systematic Name         | Standard Name |
| YBL008W                                          | HIR1          | YDR225W                 | HTA1          |
| YOR080W                                          | DIA2          | YML095C                 | RAD10         |
| YPL057C                                          | SUR1          | YBR036C                 | CSG2          |
| YFR031C-A                                        | RPL2A         | YHR060W                 | VMA22         |
| YML012W                                          | ERV25         | YKR014C                 | YPT52         |
| YGR188C                                          | BUB1          | YPR119W                 | CLB2          |
| YDR448W                                          | ADA2          | YNL107W                 | YAF9          |
| YKL002W                                          | DID4          | YKL041W                 | VPS24         |
| YDR137W                                          | RGP1          | YNL307C                 | MCK1          |
| YLR119W                                          | SRN2          | YER139C                 | YER139C       |
| YIL148W                                          | RPL40A        | YNL199C                 | GCR2          |
| YBR200W                                          | BEM1          | YMR199W                 | CLN1          |
| YDR176W                                          | NGG1          | YPL248C                 | GAL4          |
| YLR234W                                          | TOP3          | YMR167W                 | MLH1          |
| YBR112C                                          | CYC8          | YCR084C                 | TUP1          |
| YOR080W                                          | DIA2          | YJL187C                 | SWE1          |
| YBL079W                                          | NUP170        | YGL016W                 | KAP122        |
| YHR157W                                          | REC104        | YHL022C                 | SPO11         |
| YER044C                                          | ERG28         | YLR180W                 | SAM1          |
| YLR386W                                          | VAC14         | YOR035C                 | SHE4          |
| YHR084W                                          | STE12         | YBL016W                 | FUS3          |
| YDL101C                                          | DUN1          | YBL088C                 | TEL1          |
| YDR363W-A                                        | SEM1          | YNL236W                 | SIN4          |
| YBR171W                                          | SEC66         | YNL041C                 | COG6          |
| YLR170C                                          | APS1          | YHL019C                 | APM2          |
| YER114C                                          | BOI2          | YDR309C                 | GIC2          |
| YAR014C                                          | BUD14         | YDR207C                 | UME6          |
| YCL037C                                          | SRO9          | YER120W                 | SCS2          |
| YGR275W                                          | RTT102        | YOR290C                 | SNF2          |

| Predictions at threshold level 0.85 continued... |               |                         |               |
|--------------------------------------------------|---------------|-------------------------|---------------|
| Gene1 of predicted pair                          |               | Gene2 of predicted pair |               |
| Systematic Name                                  | Standard Name | Systematic Name         | Standard Name |
| YFR036W                                          | CDC26         | YML071C                 | COG8          |
| YDR329C                                          | PEX3          | YDR142C                 | PEX7          |
| YDR080W                                          | VPS41         | YGL124C                 | MON1          |
| YBR278W                                          | DPB3          | YBR274W                 | CHK1          |
| YJL154C                                          | VPS35         | YBR260C                 | RGD1          |
| YLR064W                                          | YLR064W       | YHR114W                 | BZZ1          |
| YDR254W                                          | CHL4          | YDR318W                 | MCM21         |
| YLR313C                                          | SPH1          | YLR362W                 | STE11         |
| YDR309C                                          | GIC2          | YGR152C                 | RSR1          |
| YAR014C                                          | BUD14         | YKR030W                 | GMH1          |
| YGL178W                                          | MPT5          | YNL271C                 | BNI1          |
| YJR005W                                          | APL1          | YDL226C                 | GCS1          |
| YDR176W                                          | NGG1          | YOR023C                 | AHC1          |
| YBR031W                                          | RPL4A         | YOR078W                 | BUD21         |
| YBR260C                                          | RGD1          | YHR114W                 | BZZ1          |
| YER087C-B                                        | SBH1          | YJR010C-A               | SPC1          |
| YER115C                                          | SPR6          | YCR024C-A               | PMP1          |
| YLR135W                                          | SLX4          | YMR038C                 | CCS1          |
| YDR129C                                          | SAC6          | YDR323C                 | PEP7          |
| YHR161C                                          | YAP1801       | YKR001C                 | VPS1          |
| YER011W                                          | TIR1          | YPL178W                 | CBC2          |
| YER143W                                          | DDI1          | YNR049C                 | MSO1          |
| YGL212W                                          | VAM7          | YLR452C                 | SST2          |
| YJR024C                                          | MDE1          | YMR164C                 | MSS11         |
| YAR014C                                          | BUD14         | YPR119W                 | CLB2          |
| YKL048C                                          | ELM1          | YGR270W                 | YTA7          |
| YDR176W                                          | NGG1          | YLR357W                 | RSC2          |
| YHR086W                                          | NAM8          | YBR119W                 | MUD1          |
| YGL095C                                          | VPS45         | YOR327C                 | SNC2          |

| Predictions at threshold level 0.85 continued... |               |                         |               |
|--------------------------------------------------|---------------|-------------------------|---------------|
| Gene1 of predicted pair                          |               | Gene2 of predicted pair |               |
| Systematic Name                                  | Standard Name | Systematic Name         | Standard Name |
| YMR142C                                          | RPL13B        | YDR358W                 | GGA1          |
| YPR072W                                          | NOT5          | YLR357W                 | RSC2          |
| YPL057C                                          | SUR1          | YPL195W                 | APL5          |
| YLR109W                                          | AHP1          | YER042W                 | MXR1          |
| YCL067C                                          | HMLALPHA2     | YPL240C                 | HSP82         |
| YDR477W                                          | SNF1          | YPL256C                 | CLN2          |
| YJL029C                                          | VPS53         | YGL095C                 | VPS45         |
| YHL031C                                          | GOS1          | YNL041C                 | COG6          |
| YPL161C                                          | BEM4          | YDL192W                 | ARF1          |
| YHR052W                                          | CIC1          | YLR150W                 | STM1          |
| YHR160C                                          | PEX18         | YLR191W                 | PEX13         |
| YIL159W                                          | BNR1          | YDR137W                 | RGP1          |
| YLR093C                                          | NYV1          | YML071C                 | COG8          |
| YOL044W                                          | PEX15         | YAL055W                 | PEX22         |
| YPR029C                                          | APL4          | YJR125C                 | ENT3          |
| YJR135C                                          | MCM22         | YJR032W                 | CPR7          |
| YBL071W-A                                        | KTI11         | YIL103W                 | DPH1          |
| YPL018W                                          | CTF19         | YKL114C                 | APN1          |
| YBR107C                                          | IML3          | YDR254W                 | CHL4          |
| YER114C                                          | BOI2          | YBR200W                 | BEM1          |
| YJL176C                                          | SWI3          | YGR275W                 | RTT102        |
| YDR443C                                          | SSN2          | YPL042C                 | SSN3          |
| YDR295C                                          | HDA2          | YDR318W                 | MCM21         |
| YFR036W                                          | CDC26         | YGL003C                 | CDH1          |
| YDR245W                                          | MNN10         | YGL200C                 | EMP24         |
| YPR046W                                          | MCM16         | YMR214W                 | SCJ1          |
| YOR014W                                          | RTS1          | YLR182W                 | SWI6          |
| YHL027W                                          | RIM101        | YPR173C                 | VPS4          |
| YPL024W                                          | RMI1          | YER044C                 | ERG28         |

| Predictions at threshold level 0.85 continued... |               |                         |               |
|--------------------------------------------------|---------------|-------------------------|---------------|
| Gene1 of predicted pair                          |               | Gene2 of predicted pair |               |
| Systematic Name                                  | Standard Name | Systematic Name         | Standard Name |
| YLR234W                                          | TOP3          | YBR114W                 | RAD16         |
| YLR288C                                          | MEC3          | YER161C                 | SPT2          |
| YDR264C                                          | AKR1          | YJR086W                 | STE18         |
| YGR104C                                          | SRB5          | YDR477W                 | SNF1          |
| YGL095C                                          | VPS45         | YOR036W                 | PEP12         |
| YHL027W                                          | RIM101        | YJL095W                 | BCK1          |
| YHL031C                                          | GOS1          | YEL036C                 | ANP1          |
| YDR329C                                          | PEX3          | YDL065C                 | PEX19         |
| YLR353W                                          | BUD8          | YOR301W                 | RAX1          |
| YGL087C                                          | MMS2          | YLR032W                 | RAD5          |
| YDR080W                                          | VPS41         | YKR001C                 | VPS1          |
| YNR052C                                          | POP2          | YDR378C                 | LSM6          |
| YNL051W                                          | COG5          | YAL002W                 | VPS8          |
| YMR055C                                          | BUB2          | YKL101W                 | HSL1          |
| YNL031C                                          | HHT2          | YEL056W                 | HAT2          |
| YBR111W-A                                        | SUS1          | YOL148C                 | SPT20         |
| YOR145C                                          | PNO1          | YKL143W                 | LTV1          |
| YKR069W                                          | MET1          | YKL129C                 | MYO3          |
| YOR253W                                          | NAT5          | YHR013C                 | ARD1          |
| YGL066W                                          | SGF73         | YGR252W                 | GCN5          |
| YDR146C                                          | SWI5          | YFR034C                 | PHO4          |
| YIL076W                                          | SEC28         | YDR080W                 | VPS41         |
| YPL256C                                          | CLN2          | YJR090C                 | GRR1          |
| YML095C                                          | RAD10         | YKR048C                 | NAP1          |
| YKR035W-A                                        | DID2          | YJR084W                 | CSN12         |
| YML115C                                          | VAN1          | YGL200C                 | EMP24         |
| YLR288C                                          | MEC3          | YDR289C                 | RTT103        |
| YHR052W                                          | CIC1          | YGL246C                 | RAI1          |
| YCR065W                                          | HCM1          | YPR119W                 | CLB2          |

| Predictions at threshold level 0.85 continued... |               |                         |               |
|--------------------------------------------------|---------------|-------------------------|---------------|
| Gene1 of predicted pair                          |               | Gene2 of predicted pair |               |
| Systematic Name                                  | Standard Name | Systematic Name         | Standard Name |
| YIL034C                                          | CAP2          | YBR108W                 | YBR108W       |
| YJL053W                                          | PEP8          | YDL161W                 | ENT1          |
| YHR060W                                          | VMA22         | YHR012W                 | VPS29         |
| YPL140C                                          | MKK2          | YJL095W                 | BCK1          |
| YNL206C                                          | RTT106        | YGR252W                 | GCN5          |
| YLR148W                                          | PEP3          | YAL002W                 | VPS8          |
| YDR484W                                          | VPS52         | YOR327C                 | SNC2          |
| YBR108W                                          | YBR108W       | YKR035W-A               | DID2          |
| YOR141C                                          | ARP8          | YNL107W                 | YAF9          |
| YDR477W                                          | SNF1          | YBR010W                 | HHT1          |
| YOR127W                                          | RGA1          | YGL054C                 | ERV14         |
| YDR379W                                          | RGA2          | YKR048C                 | NAP1          |
| YBR217W                                          | ATG12         | YLL042C                 | ATG10         |
| YNL307C                                          | MCK1          | YNL082W                 | PMS1          |
| YDR335W                                          | MSN5          | YDR183W                 | PLP1          |
| YDL116W                                          | NUP84         | YNL199C                 | GCR2          |
| YMR142C                                          | RPL13B        | YBR200W                 | BEM1          |
| YBR020W                                          | GAL1          | YNL004W                 | HRB1          |
| YAL024C                                          | LTE1          | YHR158C                 | KEL1          |
| YPL096C-A                                        | ERI1          | YDL223C                 | HBT1          |
| YEL043W                                          | YEL043W       | YPL120W                 | VPS30         |
| YCR084C                                          | TUP1          | YNL236W                 | SIN4          |
| YPR120C                                          | CLB5          | YGL003C                 | CDH1          |
| YDR245W                                          | MNN10         | YGL212W                 | VAM7          |
| YGR241C                                          | YAP1802       | YNR006W                 | VPS27         |
| YBL102W                                          | SFT2          | YKR020W                 | VPS51         |
| YDR378C                                          | LSM6          | YDL226C                 | GCS1          |
| YGL124C                                          | MON1          | YBR036C                 | CSG2          |
| YJL053W                                          | PEP8          | YKR030W                 | GMH1          |

| Predictions at threshold level 0.85 continued... |               |                         |               |
|--------------------------------------------------|---------------|-------------------------|---------------|
| Gene1 of predicted pair                          |               | Gene2 of predicted pair |               |
| Systematic Name                                  | Standard Name | Systematic Name         | Standard Name |
| YLR064W                                          | YLR064W       | YPL246C                 | RBD2          |
| YOR033C                                          | EXO1          | YMR199W                 | CLN1          |
| YLL007C                                          | YLL007C       | YML095C                 | RAD10         |
| YLR018C                                          | POM34         | YBL079W                 | NUP170        |
| YHR144C                                          | DCD1          | YMR201C                 | RAD14         |
| YJR063W                                          | RPA12         | YDR071C                 | PAA1          |
| YLR396C                                          | VPS33         | YPL045W                 | VPS16         |
| YLR093C                                          | NYV1          | YBR036C                 | CSG2          |
| YGL095C                                          | VPS45         | YDR323C                 | PEP7          |
| YDR363W-A                                        | SEM1          | YDR260C                 | SWM1          |
| YOR076C                                          | SKI7          | YOR145C                 | PNO1          |
| YKL006W                                          | RPL14A        | YJL095W                 | BCK1          |
| YKL135C                                          | APL2          | YJR005W                 | APL1          |
| YKR048C                                          | NAP1          | YPL256C                 | CLN2          |
| YFR010W                                          | UBP6          | YLR386W                 | VAC14         |
| YGL178W                                          | MPT5          | YBR231C                 | SWC5          |
| YDR137W                                          | RGP1          | YCL037C                 | SRO9          |
| YPL022W                                          | RAD1          | YOL090W                 | MSH2          |
| YDL020C                                          | RPN4          | YGR135W                 | PRE9          |
| YMR026C                                          | PEX12         | YAL055W                 | PEX22         |
| YJR135C                                          | MCM22         | YJL183W                 | MNN11         |
| YML115C                                          | VAN1          | YPR119W                 | CLB2          |
| YML109W                                          | ZDS2          | YHR061C                 | GIC1          |
| YOR005C                                          | DNL4          | YGL090W                 | LIF1          |
| YOR127W                                          | RGA1          | YMR199W                 | CLN1          |
| YBR108W                                          | YBR108W       | YJL095W                 | BCK1          |
| YJL172W                                          | CPS1          | YGL003C                 | CDH1          |
| YLR386W                                          | VAC14         | YDR137W                 | RGP1          |
| YDR335W                                          | MSN5          | YKL160W                 | ELF1          |

| Predictions at threshold level 0.85 continued... |               |                         |               |
|--------------------------------------------------|---------------|-------------------------|---------------|
| Gene1 of predicted pair                          |               | Gene2 of predicted pair |               |
| Systematic Name                                  | Standard Name | Systematic Name         | Standard Name |
| YKR009C                                          | FOX2          | YOL147C                 | PEX11         |
| YHR171W                                          | ATG7          | YLL042C                 | ATG10         |
| YMR153W                                          | NUP53         | YBL079W                 | NUP170        |
| YKL117W                                          | SBA1          | YNL199C                 | GCR2          |
| YJL029C                                          | VPS53         | YAL030W                 | SNC1          |
| YGR020C                                          | VMA7          | YJR040W                 | GEF1          |
| YIR009W                                          | MSL1          | YPR119W                 | CLB2          |
| YGL226C-A                                        | OST5          | YML019W                 | OST6          |
| YDR443C                                          | SSN2          | YDR146C                 | SWI5          |
| YBR200W                                          | BEM1          | YGL003C                 | CDH1          |
| YDL116W                                          | NUP84         | YGL100W                 | SEH1          |
| YLR006C                                          | SSK1          | YOR127W                 | RGA1          |
| YBR200W                                          | BEM1          | YDR245W                 | MNN10         |
| YLR234W                                          | TOP3          | YGR270W                 | YTA7          |
| YML103C                                          | NUP188        | YMR153W                 | NUP53         |
| YGL134W                                          | PCL10         | YPL219W                 | PCL8          |
| YHR052W                                          | CIC1          | YKL009W                 | MRT4          |
| YGL115W                                          | SNF4          | YEL060C                 | PRB1          |
| YDR135C                                          | YCF1          | YGL181W                 | GTS1          |
| YCR088W                                          | ABP1          | YJL187C                 | SWE1          |
| YPL024W                                          | RMI1          | YOR368W                 | RAD17         |
| YIL034C                                          | CAP2          | YLR234W                 | TOP3          |
| YMR179W                                          | SPT21         | YJR060W                 | CBF1          |
| YDR378C                                          | LSM6          | YCR077C                 | PAT1          |
| YML115C                                          | VAN1          | YML028W                 | TSA1          |
| YNL199C                                          | GCR2          | YER122C                 | GLO3          |
| YDR146C                                          | SWI5          | YOR290C                 | SNF2          |
| YKR020W                                          | VPS51         | YML001W                 | YPT7          |
| YIR025W                                          | MND2          | YGL003C                 | CDH1          |

| Predictions at threshold level 0.85 continued... |               |                         |               |
|--------------------------------------------------|---------------|-------------------------|---------------|
| Gene1 of predicted pair                          |               | Gene2 of predicted pair |               |
| Systematic Name                                  | Standard Name | Systematic Name         | Standard Name |
| YDL116W                                          | NUP84         | YKL048C                 | ELM1          |
| YER068W                                          | MOT2          | YLR357W                 | RSC2          |
| YFR036W                                          | CDC26         | YKL101W                 | HSL1          |
| YDL116W                                          | NUP84         | YBR200W                 | BEM1          |
| YPR154W                                          | PIN3          | YHR016C                 | YSC84         |
| YDR318W                                          | MCM21         | YPR119W                 | CLB2          |
| YOR035C                                          | SHE4          | YAL002W                 | VPS8          |
| YBR200W                                          | BEM1          | YGR270W                 | YTA7          |
| YOR290C                                          | SNF2          | YJL140W                 | RPB4          |
| YDR137W                                          | RGP1          | YBL025W                 | RRN10         |
| YDL013W                                          | SLX5          | YDR076W                 | RAD55         |
| YKL139W                                          | CTK1          | YGL115W                 | SNF4          |
| YOL051W                                          | GAL11         | YHR200W                 | RPN10         |
| YDL116W                                          | NUP84         | YNL248C                 | RPA49         |
| YPR036W                                          | VMA13         | YGR105W                 | VMA21         |
| YIL159W                                          | BNR1          | YBR200W                 | BEM1          |
| YHL025W                                          | SNF6          | YOR038C                 | HIR2          |
| YDR260C                                          | SWM1          | YDR318W                 | MCM21         |
| YML062C                                          | MFT1          | YCL011C                 | GBP2          |
| YCL010C                                          | SGF29         | YPL248C                 | GAL4          |
| YDR103W                                          | STE5          | YJL157C                 | FAR1          |
| YLR386W                                          | VAC14         | YOR156C                 | NFI1          |
| YMR153W                                          | NUP53         | YGL016W                 | KAP122        |
| YIL159W                                          | BNR1          | YDR309C                 | GIC2          |
| YPR120C                                          | CLB5          | YHR158C                 | KEL1          |
| YLR381W                                          | CTF3          | YLR447C                 | VMA6          |
| YPL106C                                          | SSE1          | YGL003C                 | CDH1          |
| YHR114W                                          | BZZ1          | YKR030W                 | GMH1          |
| YDR146C                                          | SWI5          | YGR252W                 | GCN5          |



| Predictions at threshold level 0.85 continued... |               |                         |               |
|--------------------------------------------------|---------------|-------------------------|---------------|
| Gene1 of predicted pair                          |               | Gene2 of predicted pair |               |
| Systematic Name                                  | Standard Name | Systematic Name         | Standard Name |
| YML115C                                          | VAN1          | YOR327C                 | SNC2          |
| YDR146C                                          | SWI5          | YMR311C                 | GLC8          |
| YOR195W                                          | SLK19         | YLR182W                 | SWI6          |
| YLR381W                                          | CTF3          | YLR315W                 | NKP2          |
| YDL042C                                          | SIR2          | YDR110W                 | FOB1          |
| YDR293C                                          | SSD1          | YOL018C                 | TLG2          |
| YHR134W                                          | WSS1          | YLR135W                 | SLX4          |
| YNL307C                                          | MCK1          | YAR014C                 | BUD14         |
| YOR106W                                          | VAM3          | YGL212W                 | VAM7          |
| YPL203W                                          | TPK2          | YER068W                 | MOT2          |
| YER118C                                          | SHO1          | YLR398C                 | SKI2          |
| YKL116C                                          | PRR1          | YIL076W                 | SEC28         |
| YLR083C                                          | EMP70         | YHR039C-A               | VMA10         |
| YDL239C                                          | ADY3          | YOR177C                 | MPC54         |
| YHR171W                                          | ATG7          | YPL149W                 | ATG5          |
| YDR103W                                          | STE5          | YBL016W                 | FUS3          |
| YMR095C                                          | SNO1          | YLR386W                 | VAC14         |
| YBR200W                                          | BEM1          | YPL161C                 | BEM4          |
| YLR138W                                          | NHA1          | YML132W                 | COS3          |
| YPR029C                                          | APL4          | YPL259C                 | APM1          |
| YLR083C                                          | EMP70         | YLR360W                 | VPS38         |
| YIL159W                                          | BNR1          | YOR035C                 | SHE4          |
| YBL103C                                          | RTG3          | YBL025W                 | RRN10         |
| YER122C                                          | GLO3          | YPR032W                 | SRO7          |
| YJL124C                                          | LSM1          | YPR119W                 | CLB2          |
| YHR039C-A                                        | VMA10         | YGL148W                 | ARO2          |
| YBL008W                                          | HIR1          | YNL206C                 | RTT106        |
| YNL206C                                          | RTT106        | YML102W                 | CAC2          |
| YPL129W                                          | TAF14         | YOR189W                 | IES4          |

| Predictions at threshold level 0.85 continued... |               |                         |               |
|--------------------------------------------------|---------------|-------------------------|---------------|
| Gene1 of predicted pair                          |               | Gene2 of predicted pair |               |
| Systematic Name                                  | Standard Name | Systematic Name         | Standard Name |
| YLR093C                                          | NYV1          | YDL077C                 | VAM6          |
| YLR102C                                          | APC9          | YGL003C                 | CDH1          |
| YDR335W                                          | MSN5          | YJL157C                 | FAR1          |
| YMR224C                                          | MRE11         | YLR394W                 | CST9          |
| YDR378C                                          | LSM6          | YOR320C                 | GNT1          |
| YJR099W                                          | YUH1          | YOR124C                 | UBP2          |
| YLL007C                                          | YLL007C       | YAL002W                 | VPS8          |
| YGL033W                                          | HOP2          | YNL325C                 | FIG4          |
| YBR107C                                          | IML3          | YGR188C                 | BUB1          |
| YGR104C                                          | SRB5          | YCR077C                 | PAT1          |
| YDR443C                                          | SSN2          | YGR249W                 | MGA1          |
| YBR216C                                          | YBP1          | YML007W                 | YAP1          |
| YGL223C                                          | COG1          | YNL041C                 | COG6          |
| YOR106W                                          | VAM3          | YLR309C                 | IMH1          |
| YPL115C                                          | BEM3          | YMR273C                 | ZDS1          |
| YCR020C-A                                        | MAK31         | YCR066W                 | RAD18         |
| YNL307C                                          | MCK1          | YPL018W                 | CTF19         |
| YBR108W                                          | YBR108W       | YKR099W                 | BAS1          |
| YBL078C                                          | ATG8          | YHL031C                 | GOS1          |
| YPR066W                                          | UBA3          | YDR139C                 | RUB1          |
| YGL200C                                          | EMP24         | YKR014C                 | YPT52         |
| YEL013W                                          | VAC8          | YAL002W                 | VPS8          |
| YOR069W                                          | VPS5          | YJR040W                 | GEF1          |
| YPL249C-A                                        | RPL36B        | YCR009C                 | RVS161        |
| YMR026C                                          | PEX12         | YDR142C                 | PEX7          |
| YPL022W                                          | RAD1          | YOR368W                 | RAD17         |
| YKL139W                                          | CTK1          | YKL110C                 | KTI12         |
| YOL051W                                          | GAL11         | YER068W                 | MOT2          |
| YOR076C                                          | SKI7          | YHR077C                 | NMD2          |

| Predictions at threshold level 0.85 continued... |               |                         |               |
|--------------------------------------------------|---------------|-------------------------|---------------|
| Gene1 of predicted pair                          |               | Gene2 of predicted pair |               |
| Systematic Name                                  | Standard Name | Systematic Name         | Standard Name |
| YOR039W                                          | CKB2          | YNL079C                 | TPM1          |
| YDL082W                                          | RPL13A        | YGL246C                 | RAI1          |
| YBL071W-A                                        | KTI11         | YKL191W                 | DPH2          |
| YGL078C                                          | DBP3          | YIL076W                 | SEC28         |
| YML095C                                          | RAD10         | YML102W                 | CAC2          |
| YNL090W                                          | RHO2          | YDL240W                 | LRG1          |
| YER118C                                          | SHO1          | YJL183W                 | MNN11         |
| YNL044W                                          | YIP3          | YKR020W                 | VPS51         |
| YGR200C                                          | ELP2          | YBL071W-A               | KTI11         |
| YDR477W                                          | SNF1          | YDR358W                 | GGA1          |
| YCR097W                                          | HMRA1         | YCR039C                 | MATALPHA2     |
| YPR120C                                          | CLB5          | YOL091W                 | SPO21         |
| YNL106C                                          | INP52         | YML016C                 | PPZ1          |
| YCL001W                                          | RER1          | YNL238W                 | KEX2          |
| YOR197W                                          | MCA1          | YBL106C                 | SRO77         |
| YDR363W-A                                        | SEM1          | YGR252W                 | GCN5          |
| YDR443C                                          | SSN2          | YGL115W                 | SNF4          |
| YLR135W                                          | SLX4          | YCR086W                 | CSM1          |
| YER068W                                          | MOT2          | YGR134W                 | CAF130        |
| YGL212W                                          | VAM7          | YDR080W                 | VPS41         |
| YMR055C                                          | BUB2          | YPR046W                 | MCM16         |
| YMR231W                                          | PEP5          | YLR093C                 | NYV1          |
| YDR103W                                          | STE5          | YCL032W                 | STE50         |
| YFL048C                                          | EMP47         | YEL036C                 | ANP1          |
| YBL103C                                          | RTG3          | YOL067C                 | RTG1          |
| YMR199W                                          | CLN1          | YMR311C                 | GLC8          |
| YHR161C                                          | YAP1801       | YAL030W                 | SNC1          |
| YER044C                                          | ERG28         | YML071C                 | COG8          |
| YAL014C                                          | SYN8          | YOR036W                 | PEP12         |

| Predictions at threshold level 0.85 continued... |               |                         |               |
|--------------------------------------------------|---------------|-------------------------|---------------|
| Gene1 of predicted pair                          |               | Gene2 of predicted pair |               |
| Systematic Name                                  | Standard Name | Systematic Name         | Standard Name |
| YLR360W                                          | VPS38         | YOR035C                 | SHE4          |
| YHR013C                                          | ARD1          | YBL025W                 | RRN10         |
| YDR071C                                          | PAA1          | YKL114C                 | APN1          |
| YPR072W                                          | NOT5          | YGR134W                 | CAF130        |
| YPR084W                                          | YPR084W       | YOR069W                 | VPS5          |
| YBR065C                                          | ECM2          | YBR188C                 | NTC20         |
| YLR357W                                          | RSC2          | YNL107W                 | YAF9          |
| YDL065C                                          | PEX19         | YAL055W                 | PEX22         |
| YLR447C                                          | VMA6          | YEL051W                 | VMA8          |
| YMR095C                                          | SNO1          | YNL333W                 | SNZ2          |
| YOR106W                                          | VAM3          | YAL002W                 | VPS8          |
| YOL062C                                          | APM4          | YJR005W                 | APL1          |
| YOR290C                                          | SNF2          | YGL025C                 | PGD1          |
| YMR142C                                          | RPL13B        | YMR311C                 | GLC8          |
| YPL161C                                          | BEM4          | YKL101W                 | HSL1          |
| YLR452C                                          | SST2          | YOR327C                 | SNC2          |
| YMR029C                                          | FAR8          | YMR052W                 | FAR3          |
| YDR225W                                          | HTA1          | YOL148C                 | SPT20         |
| YOR195W                                          | SLK19         | YDR378C                 | LSM6          |
| YCL037C                                          | SRO9          | YDR378C                 | LSM6          |
| YNL236W                                          | SIN4          | YGL151W                 | NUT1          |
| YLR181C                                          | VTA1          | YKL002W                 | DID4          |
| YIL159W                                          | BNR1          | YJR032W                 | CPR7          |
| YDR225W                                          | HTA1          | YDR176W                 | NGG1          |
| YHR119W                                          | SET1          | YDR469W                 | SDC1          |
| YGL237C                                          | HAP2          | YKL109W                 | HAP4          |
| YNL214W                                          | PEX17         | YAL055W                 | PEX22         |
| YDR174W                                          | HMO1          | YLR254C                 | NDL1          |
| YIL034C                                          | CAP2          | YJL095W                 | BCK1          |

| Predictions at threshold level 0.85 continued... |               |                         |               |
|--------------------------------------------------|---------------|-------------------------|---------------|
| Gene1 of predicted pair                          |               | Gene2 of predicted pair |               |
| Systematic Name                                  | Standard Name | Systematic Name         | Standard Name |
| YOR109W                                          | INP53         | YNR006W                 | VPS27         |
| YDR137W                                          | RGP1          | YBR280C                 | SAF1          |
| YGR105W                                          | VMA21         | YKL119C                 | VPH2          |
| YMR276W                                          | DSK2          | YJR099W                 | YUH1          |
| YEL009C                                          | GCN4          | YLR399C                 | BDF1          |
| YLR381W                                          | CTF3          | YGL124C                 | MON1          |
| YDR379W                                          | RGA2          | YPL161C                 | BEM4          |
| YGR133W                                          | PEX4          | YAL055W                 | PEX22         |
| YJR135C                                          | MCM22         | YPR119W                 | CLB2          |
| YHR119W                                          | SET1          | YLR288C                 | MEC3          |
| YIL159W                                          | BNR1          | YNL307C                 | MCK1          |
| YMR224C                                          | MRE11         | YGL161C                 | YIP5          |
| YLR429W                                          | CRN1          | YDL226C                 | GCS1          |
| YDR323C                                          | PEP7          | YOR036W                 | PEP12         |
| YOR001W                                          | RRP6          | YPL178W                 | CBC2          |
| YFL031W                                          | HAC1          | YDR207C                 | UME6          |
| YDR334W                                          | SWR1          | YBR089C-A               | NHP6B         |
| YMR231W                                          | PEP5          | YDL077C                 | VAM6          |
| YCR066W                                          | RAD18         | YER122C                 | GLO3          |
| YPL018W                                          | CTF19         | YEL056W                 | HAT2          |
| YGL212W                                          | VAM7          | YDR153C                 | ENT5          |
| YDL006W                                          | PTC1          | YDR153C                 | ENT5          |
| YHR060W                                          | VMA22         | YML001W                 | YPT7          |
| YNL288W                                          | CAF40         | YGR134W                 | CAF130        |
| YLR234W                                          | TOP3          | YGR184C                 | UBR1          |
| YDR422C                                          | SIP1          | YJR090C                 | GRR1          |
| YOR275C                                          | RIM20         | YKL041W                 | VPS24         |
| YBL008W                                          | HIR1          | YJR032W                 | CPR7          |
| YJL210W                                          | PEX2          | YGR077C                 | PEX8          |

| Predictions at threshold level 0.85 continued... |               |                         |               |
|--------------------------------------------------|---------------|-------------------------|---------------|
| Gene1 of predicted pair                          |               | Gene2 of predicted pair |               |
| Systematic Name                                  | Standard Name | Systematic Name         | Standard Name |
| YMR273C                                          | ZDS1          | YPL256C                 | CLN2          |
| YOR035C                                          | SHE4          | YLR370C                 | ARC18         |
| YEL027W                                          | CUP5          | YHR060W                 | VMA22         |
| YKR020W                                          | VPS51         | YER122C                 | GLO3          |
| YIL162W                                          | SUC2          | YEL036C                 | ANP1          |
| YNL025C                                          | SSN8          | YBL075C                 | SSA3          |
| YMR253C                                          | YMR253C       | YHR114W                 | BZZ1          |
| YDR448W                                          | ADA2          | YBL003C                 | HTA2          |
| YOR106W                                          | VAM3          | YGL223C                 | COG1          |
| YBR200W                                          | BEM1          | YJL058C                 | BIT61         |
| YOR043W                                          | WHI2          | YER122C                 | GLO3          |
| YML115C                                          | VAN1          | YDR137W                 | RGP1          |
| YDR245W                                          | MNN10         | YMR109W                 | MYO5          |
| YBR200W                                          | BEM1          | YDL226C                 | GCS1          |
| YHR086W                                          | NAM8          | YPR101W                 | SNT309        |
| YIL076W                                          | SEC28         | YGL124C                 | MON1          |
| YLR386W                                          | VAC14         | YDL006W                 | PTC1          |
| YMR199W                                          | CLN1          | YHR158C                 | KEL1          |
| YOR337W                                          | TEA1          | YNL307C                 | MCK1          |
| YDR260C                                          | SWM1          | YPR119W                 | CLB2          |
| YKR014C                                          | YPT52         | YPR028W                 | YOP1          |
| YNL215W                                          | IES2          | YJL183W                 | MNN11         |
| YPL115C                                          | BEM3          | YJR090C                 | GRR1          |
| YDR477W                                          | SNF1          | YPL248C                 | GAL4          |
| YMR026C                                          | PEX12         | YOL044W                 | PEX15         |
| YNL307C                                          | MCK1          | YKR001C                 | VPS1          |
| YDR192C                                          | NUP42         | YBR017C                 | KAP104        |
| YNL288W                                          | CAF40         | YNR052C                 | POP2          |
| YDR329C                                          | PEX3          | YOL147C                 | PEX11         |

| Predictions at threshold level 0.85 continued... |               |                         |               |
|--------------------------------------------------|---------------|-------------------------|---------------|
| Gene1 of predicted pair                          |               | Gene2 of predicted pair |               |
| Systematic Name                                  | Standard Name | Systematic Name         | Standard Name |
| YMR055C                                          | BUB2          | YCR086W                 | CSM1          |
| YNL238W                                          | KEX2          | YBR036C                 | CSG2          |
| YMR198W                                          | CIK1          | YPR119W                 | CLB2          |
| YIR009W                                          | MSL1          | YDR184C                 | ATC1          |
| YLR377C                                          | FBP1          | YNR065C                 | YNR065C       |
| YBR171W                                          | SEC66         | YPL227C                 | ALG5          |
| YHR084W                                          | STE12         | YDL159W                 | STE7          |
| YMR055C                                          | BUB2          | YPR119W                 | CLB2          |
| YBR200W                                          | BEM1          | YFR036W                 | CDC26         |
| YDR225W                                          | HTA1          | YDL155W                 | CLB3          |
| YPL234C                                          | TFP3          | YMR054W                 | STV1          |
| YNL106C                                          | INP52         | YCR088W                 | ABP1          |
| YHR012W                                          | VPS29         | YJL183W                 | MNN11         |
| YGR105W                                          | VMA21         | YJL183W                 | MNN11         |
| YLR058C                                          | SHM2          | YDL226C                 | GCS1          |
| YPL086C                                          | ELP3          | YHR187W                 | IKI1          |
| YIL002C                                          | INP51         | YMR070W                 | MOT3          |
| YBR030W                                          | YBR030W       | YDR137W                 | RGP1          |
| YIL053W                                          | RHR2          | YBL025W                 | RRN10         |
| YDR443C                                          | SSN2          | YFL028C                 | CAF16         |
| YLR447C                                          | VMA6          | YGR188C                 | BUB1          |
| YEL027W                                          | CUP5          | YPL234C                 | TFP3          |
| YGR105W                                          | VMA21         | YEL051W                 | VMA8          |
| YLR360W                                          | VPS38         | YOR112W                 | CEX1          |
| YLR381W                                          | CTF3          | YPR046W                 | MCM16         |
| YOR140W                                          | SFL1          | YNL236W                 | SIN4          |
| YKL139W                                          | CTK1          | YDL002C                 | NHP10         |
| YPL024W                                          | RMI1          | YKR035W-A               | DID2          |
| YLR191W                                          | PEX13         | YOL044W                 | PEX15         |

| Predictions at threshold level 0.85 continued... |               |                         |               |
|--------------------------------------------------|---------------|-------------------------|---------------|
| Gene1 of predicted pair                          |               | Gene2 of predicted pair |               |
| Systematic Name                                  | Standard Name | Systematic Name         | Standard Name |
| YKL048C                                          | ELM1          | YDR130C                 | FIN1          |
| YAR042W                                          | SWH1          | YHR195W                 | NVJ1          |
| YLR093C                                          | NYV1          | YDR358W                 | GGA1          |
| YIL076W                                          | SEC28         | YDR245W                 | MNN10         |
| YDR137W                                          | RGP1          | YNR072W                 | HXT17         |
| YHL031C                                          | GOS1          | YNL051W                 | COG5          |
| YML095C                                          | RAD10         | YOL090W                 | MSH2          |
| YBL019W                                          | APN2          | YCR066W                 | RAD18         |
| YLR386W                                          | VAC14         | YGL163C                 | RAD54         |
| YKL139W                                          | CTK1          | YNL253W                 | TEX1          |
| YEL009C                                          | GCN4          | YDR176W                 | NGG1          |
| YGR104C                                          | SRB5          | YGR252W                 | GCN5          |
| YDR080W                                          | VPS41         | YAL002W                 | VPS8          |
| YBR171W                                          | SEC66         | YKR014C                 | YPT52         |
| YKL160W                                          | ELF1          | YAL002W                 | VPS8          |
| YBR200W                                          | BEM1          | YPR120C                 | CLB5          |
| YGR252W                                          | GCN5          | YBL002W                 | HTB2          |
| YML016C                                          | PPZ1          | YOR275C                 | RIM20         |
| YPR007C                                          | REC8          | YPR119W                 | CLB2          |
| YML088W                                          | UFO1          | YJL204C                 | RCY1          |
| YML071C                                          | COG8          | YDL192W                 | ARF1          |
| YMR202W                                          | ERG2          | YER044C                 | ERG28         |
| YGL178W                                          | MPT5          | YDR485C                 | VPS72         |
| YDR174W                                          | HMO1          | YDR289C                 | RTT103        |
| YDR484W                                          | VPS52         | YJL204C                 | RCY1          |
| YNL288W                                          | CAF40         | YPL042C                 | SSN3          |
| YDR382W                                          | RPP2B         | YPL220W                 | RPL1A         |
| YBR260C                                          | RGD1          | YNL090W                 | RHO2          |
| YJL029C                                          | VPS53         | YDL226C                 | GCS1          |



| Predictions at threshold level 0.85 continued... |               |                         |               |
|--------------------------------------------------|---------------|-------------------------|---------------|
| Gene1 of predicted pair                          |               | Gene2 of predicted pair |               |
| Systematic Name                                  | Standard Name | Systematic Name         | Standard Name |
| YBL078C                                          | ATG8          | YNL223W                 | ATG4          |
| YNL288W                                          | CAF40         | YAL002W                 | VPS8          |
| YDR245W                                          | MNN10         | YFL048C                 | EMP47         |
| YDR004W                                          | RAD57         | YMR198W                 | CIK1          |
| YOR195W                                          | SLK19         | YNL307C                 | MCK1          |
| YBR171W                                          | SEC66         | YML071C                 | COG8          |
| YLR385C                                          | SWC7          | YLR399C                 | BDF1          |
| YHR060W                                          | VMA22         | YKL041W                 | VPS24         |
| YOR076C                                          | SKI7          | YPR189W                 | SKI3          |
| YJL172W                                          | CPS1          | YLR180W                 | SAM1          |
| YCR092C                                          | MSH3          | YOL090W                 | MSH2          |
| YKL006W                                          | RPL14A        | YGR135W                 | PRE9          |
| YNL243W                                          | SLA2          | YLR337C                 | VRP1          |
| YDR363W-A                                        | SEM1          | YLR421C                 | RPN13         |
| YDR358W                                          | GGA1          | YMR311C                 | GLC8          |
| YOR290C                                          | SNF2          | YKL160W                 | ELF1          |
| YPL161C                                          | BEM4          | YHR061C                 | GIC1          |
| YML001W                                          | YPT7          | YLR093C                 | NYV1          |
| YHR098C                                          | SFB3          | YPR135W                 | CTF4          |
| YNL199C                                          | GCR2          | YDR289C                 | RTT103        |
| YHL031C                                          | GOS1          | YGL212W                 | VAM7          |
| YLR423C                                          | ATG17         | YNL090W                 | RHO2          |
| YMR198W                                          | CIK1          | YPL018W                 | CTF19         |
| YGR252W                                          | GCN5          | YGL252C                 | RTG2          |
| YDR507C                                          | GIN4          | YJL187C                 | SWE1          |
| YOL145C                                          | CTR9          | YJL140W                 | RPB4          |
| YDR103W                                          | STE5          | YOR212W                 | STE4          |
| YDR192C                                          | NUP42         | YGR081C                 | SLX9          |
| YBR030W                                          | YBR030W       | YLR398C                 | SKI2          |

| Predictions at threshold level 0.85 continued... |               |                         |               |
|--------------------------------------------------|---------------|-------------------------|---------------|
| Gene1 of predicted pair                          |               | Gene2 of predicted pair |               |
| Systematic Name                                  | Standard Name | Systematic Name         | Standard Name |
| YMR224C                                          | MRE11         | YLR032W                 | RAD5          |
| YLR234W                                          | TOP3          | YHR013C                 | ARD1          |
| YBR171W                                          | SEC66         | YDL056W                 | MBP1          |
| YAL024C                                          | LTE1          | YHL022C                 | SPO11         |
| YDR383C                                          | NKP1          | YLR381W                 | CTF3          |
| YLR079W                                          | SIC1          | YDR378C                 | LSM6          |
| YLR386W                                          | VAC14         | YHR013C                 | ARD1          |
| YMR025W                                          | CSI1          | YJR084W                 | CSN12         |
| YOL051W                                          | GAL11         | YLR357W                 | RSC2          |
| YKL068W                                          | NUP100        | YJR090C                 | GRR1          |
| YOR106W                                          | VAM3          | YML071C                 | COG8          |
| YOR230W                                          | WTM1          | YOR229W                 | WTM2          |
| YGR173W                                          | RBG2          | YDR152W                 | GIR2          |
| YNL238W                                          | KEX2          | YMR311C                 | GLC8          |
| YDR137W                                          | RGP1          | YLR371W                 | ROM2          |
| YOR109W                                          | INP53         | YNL238W                 | KEX2          |
| YBR274W                                          | CHK1          | YKL114C                 | APN1          |
| YJR035W                                          | RAD26         | YKL054C                 | DEF1          |
| YEL013W                                          | VAC8          | YPR185W                 | ATG13         |
| YHR167W                                          | THP2          | YLR350W                 | ORM2          |
| YOL044W                                          | PEX15         | YNL214W                 | PEX17         |
| YPR036W                                          | VMA13         | YER005W                 | YND1          |
| YGR270W                                          | YTA7          | YOL054W                 | PSH1          |
| YOR080W                                          | DIA2          | YPR119W                 | CLB2          |
| YGL025C                                          | PGD1          | YML001W                 | YPT7          |
| YML016C                                          | PPZ1          | YGL003C                 | CDH1          |
| YLR447C                                          | VMA6          | YAL002W                 | VPS8          |
| YBR215W                                          | HPC2          | YDR171W                 | HSP42         |
| YDR484W                                          | VPS52         | YJL029C                 | VPS53         |

| Predictions at threshold level 0.85 continued... |               |                         |               |
|--------------------------------------------------|---------------|-------------------------|---------------|
| Gene1 of predicted pair                          |               | Gene2 of predicted pair |               |
| Systematic Name                                  | Standard Name | Systematic Name         | Standard Name |
| YNL025C                                          | SSN8          | YKL139W                 | CTK1          |
| YKR101W                                          | SIR1          | YBR010W                 | HHT1          |
| YLR109W                                          | AHP1          | YOL151W                 | GRE2          |
| YGL237C                                          | HAP2          | YNL107W                 | YAF9          |
| YGR159C                                          | NSR1          | YLR410W                 | VIP1          |
| YLR148W                                          | PEP3          | YMR231W                 | PEP5          |
| YCR086W                                          | CSM1          | YDR183W                 | PLP1          |
| YLR447C                                          | VMA6          | YKL080W                 | VMA5          |
| YIR025W                                          | MND2          | YFR036W                 | CDC26         |
| YDL006W                                          | PTC1          | YPL089C                 | RLM1          |
| YOR195W                                          | SLK19         | YOR127W                 | RGA1          |
| YDR176W                                          | NGG1          | YCL010C                 | SGF29         |
| YLR396C                                          | VPS33         | YAL002W                 | VPS8          |
| YGL066W                                          | SGF73         | YPL248C                 | GAL4          |
| YMR284W                                          | YKU70         | YLR135W                 | SLX4          |
| YLR043C                                          | TRX1          | YDR080W                 | VPS41         |
| YJL154C                                          | VPS35         | YER122C                 | GLO3          |
| YDL239C                                          | ADY3          | YNL225C                 | CNM67         |
| YJL029C                                          | VPS53         | YER143W                 | DDI1          |
| YML115C                                          | VAN1          | YLR398C                 | SKI2          |
| YIL159W                                          | BNR1          | YPL161C                 | BEM4          |
| YML062C                                          | MFT1          | YNL004W                 | HRB1          |
| YHR200W                                          | RPN10         | YPL256C                 | CLN2          |
| YML095C                                          | RAD10         | YGL163C                 | RAD54         |
| YBR215W                                          | HPC2          | YDR378C                 | LSM6          |
| YOR212W                                          | STE4          | YCL032W                 | STE50         |
| YIL076W                                          | SEC28         | YAL002W                 | VPS8          |
| YDR484W                                          | VPS52         | YDR137W                 | RGP1          |
| YLR381W                                          | CTF3          | YPR119W                 | CLB2          |

| Predictions at threshold level 0.85 continued... |               |                         |               |
|--------------------------------------------------|---------------|-------------------------|---------------|
| Gene1 of predicted pair                          |               | Gene2 of predicted pair |               |
| Systematic Name                                  | Standard Name | Systematic Name         | Standard Name |
| YCR081W                                          | SRB8          | YDR146C                 | SWI5          |
| YPL042C                                          | SSN3          | YNR052C                 | POP2          |
| YGR241C                                          | YAP1802       | YFL026W                 | STE2          |
| YBR111W-A                                        | SUS1          | YBR009C                 | HHF1          |
| YOR106W                                          | VAM3          | YDL077C                 | VAM6          |
| YHR134W                                          | WSS1          | YHR178W                 | STB5          |
| YDR080W                                          | VPS41         | YKR030W                 | GMH1          |
| YCL037C                                          | SRO9          | YPR032W                 | SRO7          |
| YPL037C                                          | EGD1          | YDR252W                 | BTT1          |
| YPR017C                                          | DSS4          | YML071C                 | COG8          |
| YHR013C                                          | ARD1          | YJR084W                 | CSN12         |
| YGR239C                                          | PEX21         | YDR142C                 | PEX7          |
| YJR032W                                          | CPR7          | YBR114W                 | RAD16         |
| YBR112C                                          | CYC8          | YGL025C                 | PGD1          |
| YJL138C                                          | TIF2          | YPR119W                 | CLB2          |
| YNL307C                                          | MCK1          | YLR180W                 | SAM1          |
| YDR293C                                          | SSD1          | YBR171W                 | SEC66         |
| YLR396C                                          | VPS33         | YGL095C                 | VPS45         |
| YML006C                                          | GIS4          | YGL115W                 | SNF4          |
| YLR238W                                          | FAR10         | YMR052W                 | FAR3          |
| YDR507C                                          | GIN4          | YNL078W                 | NIS1          |
| YNL307C                                          | MCK1          | YBL025W                 | RRN10         |
| YBR107C                                          | IML3          | YPL018W                 | CTF19         |
| YMR095C                                          | SNO1          | YDR207C                 | UME6          |
| YML115C                                          | VAN1          | YER049W                 | TPA1          |
| YDL042C                                          | SIR2          | YGR252W                 | GCN5          |
| YMR026C                                          | PEX12         | YLR191W                 | PEX13         |
| YFR032C-A                                        | RPL29         | YML115C                 | VAN1          |
| YDR289C                                          | RTT103        | YNL147W                 | LSM7          |

| Predictions at threshold level 0.85 continued... |               |                         |               |
|--------------------------------------------------|---------------|-------------------------|---------------|
| Gene1 of predicted pair                          |               | Gene2 of predicted pair |               |
| Systematic Name                                  | Standard Name | Systematic Name         | Standard Name |
| YPL234C                                          | TFP3          | YHR039C-A               | VMA10         |
| YDR443C                                          | SSN2          | YGL025C                 | PGD1          |
| YNL243W                                          | SLA2          | YLR206W                 | ENT2          |
| YLR337C                                          | VRP1          | YJL095W                 | BCK1          |
| YDR202C                                          | RAV2          | YHR039C-A               | VMA10         |
| YDR507C                                          | GIN4          | YJL157C                 | FAR1          |
| YER001W                                          | MNN1          | YEL036C                 | ANP1          |
| YNL025C                                          | SSN8          | YIL076W                 | SEC28         |
| YNL243W                                          | SLA2          | YMR022W                 | UBC7          |
| YKL160W                                          | ELF1          | YIR005W                 | IST3          |
| YMR004W                                          | MVP1          | YGL212W                 | VAM7          |
| YLL039C                                          | UBI4          | YMR276W                 | DSK2          |
| YMR039C                                          | SUB1          | YOL145C                 | CTR9          |
| YHR052W                                          | CIC1          | YGL189C                 | RPS26A        |
| YJL124C                                          | LSM1          | YNL147W                 | LSM7          |
| YGR004W                                          | PEX31         | YLR324W                 | PEX30         |
| YLR079W                                          | SIC1          | YOR039W                 | CKB2          |
| YMR179W                                          | SPT21         | YMR038C                 | CCS1          |
| YKR020W                                          | VPS51         | YDR153C                 | ENT5          |
| YHR134W                                          | WSS1          | YCL037C                 | SRO9          |
| YDR295C                                          | HDA2          | YPR179C                 | HDA3          |
| YDR363W-A                                        | SEM1          | YPR120C                 | CLB5          |
| YER044C-A                                        | MEI4          | YMR133W                 | REC114        |
| YDR142C                                          | PEX7          | YGL153W                 | PEX14         |
| YPL024W                                          | RMI1          | YCL037C                 | SRO9          |
| YBR111W-A                                        | SUS1          | YBR010W                 | HHT1          |
| YJL124C                                          | LSM1          | YJR060W                 | CBF1          |
| YDR137W                                          | RGP1          | YER161C                 | SPT2          |
| YGR129W                                          | SYF2          | YCR063W                 | BUD31         |

| Predictions at threshold level 0.85 continued... |               |                         |               |
|--------------------------------------------------|---------------|-------------------------|---------------|
| Gene1 of predicted pair                          |               | Gene2 of predicted pair |               |
| Systematic Name                                  | Standard Name | Systematic Name         | Standard Name |
| YMR243C                                          | ZRC1          | YGL158W                 | RCK1          |
| YOL018C                                          | TLG2          | YDL047W                 | SIT4          |
| YDR363W-A                                        | SEM1          | YOR141C                 | ARP8          |
| YEL009C                                          | GCN4          | YOR290C                 | SNF2          |
| YOR290C                                          | SNF2          | YNL236W                 | SIN4          |
| YBR215W                                          | HPC2          | YJR005W                 | APL1          |
| YNL106C                                          | INP52         | YBL027W                 | RPL19B        |
| YGR020C                                          | VMA7          | YLR447C                 | VMA6          |
| YML095C                                          | RAD10         | YDR076W                 | RAD55         |
| YGR105W                                          | VMA21         | YMR054W                 | STV1          |
| YGR104C                                          | SRB5          | YBR009C                 | HHF1          |
| YOR033C                                          | EXO1          | YOL090W                 | MSH2          |
| YNL047C                                          | SLM2          | YJL058C                 | BIT61         |
| YEL065W                                          | SIT1          | YGL003C                 | CDH1          |
| YCL001W                                          | RER1          | YGL054C                 | ERV14         |
| YNL025C                                          | SSN8          | YKL160W                 | ELF1          |
| YHR010W                                          | RPL27A        | YGL246C                 | RAI1          |
| YLR447C                                          | VMA6          | YGR105W                 | VMA21         |
| YMR116C                                          | ASC1          | YBL025W                 | RRN10         |
| YOR195W                                          | SLK19         | YDR439W                 | LRS4          |
| YEL027W                                          | CUP5          | YKL119C                 | VPH2          |
| YPL240C                                          | HSP82         | YMR165C                 | PAH1          |
| YML115C                                          | VAN1          | YOR035C                 | SHE4          |
| YGR241C                                          | YAP1802       | YDL161W                 | ENT1          |
| YDR477W                                          | SNF1          | YJL172W                 | CPS1          |
| YPL105C                                          | YPL105C       | YPR032W                 | SRO7          |
| YMR164C                                          | MSS11         | YMR199W                 | CLN1          |
| YHL031C                                          | GOS1          | YOR327C                 | SNC2          |
| YFL003C                                          | MSH4          | YGL249W                 | ZIP2          |

| Predictions at threshold level 0.85 continued... |               |                         |               |
|--------------------------------------------------|---------------|-------------------------|---------------|
| Gene1 of predicted pair                          |               | Gene2 of predicted pair |               |
| Systematic Name                                  | Standard Name | Systematic Name         | Standard Name |
| YNL243W                                          | SLA2          | YJR058C                 | APS2          |
| YML012W                                          | ERV25         | YLR093C                 | NYV1          |
| YER110C                                          | KAP123        | YBR009C                 | HHF1          |
| YJL210W                                          | PEX2          | YDR244W                 | PEX5          |
| YLR399C                                          | BDF1          | YNL031C                 | HHT2          |
| YNL238W                                          | KEX2          | YPL195W                 | APL5          |
| YNL243W                                          | SLA2          | YPL031C                 | PHO85         |
| YMR224C                                          | MRE11         | YGL163C                 | RAD54         |
| YFR024C-A                                        | LSB3          | YMR253C                 | YMR253C       |
| YIL076W                                          | SEC28         | YBR171W                 | SEC66         |
| YMR004W                                          | MVP1          | YDR137W                 | RGP1          |
| YOR035C                                          | SHE4          | YOR036W                 | PEP12         |
| YOR132W                                          | VPS17         | YDR358W                 | GGA1          |
| YMR109W                                          | MYO5          | YHL002W                 | HSE1          |
| YDR137W                                          | RGP1          | YLR398C                 | SKI2          |
| YOR332W                                          | VMA4          | YMR054W                 | STV1          |
| YJL176C                                          | SWI3          | YLR357W                 | RSC2          |
| YBR270C                                          | BIT2          | YPR119W                 | CLB2          |
| YDR080W                                          | VPS41         | YEL013W                 | VAC8          |
| YKR020W                                          | VPS51         | YOR036W                 | PEP12         |
| YFR036W                                          | CDC26         | YPL018W                 | CTF19         |
| YKL092C                                          | BUD2          | YGR152C                 | RSR1          |
| YLR018C                                          | POM34         | YKL068W                 | NUP100        |
| YGL033W                                          | HOP2          | YLR093C                 | NYV1          |
| YLR083C                                          | EMP70         | YGL223C                 | COG1          |
| YLR083C                                          | EMP70         | YGL212W                 | VAM7          |
| YLR337C                                          | VRP1          | YMR032W                 | HOF1          |
| YAL051W                                          | OAF1          | YOR363C                 | PIP2          |
| YNL025C                                          | SSN8          | YPL248C                 | GAL4          |

| Predictions at threshold level 0.85 continued... |               |                         |               |
|--------------------------------------------------|---------------|-------------------------|---------------|
| Gene1 of predicted pair                          |               | Gene2 of predicted pair |               |
| Systematic Name                                  | Standard Name | Systematic Name         | Standard Name |
| YBR131W                                          | CCZ1          | YML001W                 | YPT7          |
| YML001W                                          | YPT7          | YPL045W                 | VPS16         |
| YHR205W                                          | SCH9          | YEL036C                 | ANP1          |
| YNL307C                                          | MCK1          | YLR398C                 | SKI2          |
| YLR191W                                          | PEX13         | YDR142C                 | PEX7          |
| YBR200W                                          | BEM1          | YBL051C                 | PIN4          |
| YGL054C                                          | ERV14         | YML001W                 | YPT7          |
| YNL243W                                          | SLA2          | YLL021W                 | SPA2          |
| YER110C                                          | KAP123        | YGL016W                 | KAP122        |
| YOR080W                                          | DIA2          | YPR120C                 | CLB5          |
| YLR396C                                          | VPS33         | YMR231W                 | PEP5          |
| YDR484W                                          | VPS52         | YOR036W                 | PEP12         |
| YAL020C                                          | ATS1          | YDR507C                 | GIN4          |
| YDR245W                                          | MNN10         | YJL183W                 | MNN11         |
| YBR107C                                          | IML3          | YDR363W-A               | SEM1          |
| YLR433C                                          | CNA1          | YIR009W                 | MSL1          |
| YGL115W                                          | SNF4          | YER027C                 | GAL83         |
| YPR167C                                          | MET16         | YLR093C                 | NYV1          |
| YJL124C                                          | LSM1          | YML088W                 | UFO1          |
| YJL140W                                          | RPB4          | YNL107W                 | YAF9          |
| YDR129C                                          | SAC6          | YKL032C                 | IXR1          |
| YIL034C                                          | CAP2          | YPL161C                 | BEM4          |
| YPL024W                                          | RMI1          | YPL161C                 | BEM4          |
| YPL129W                                          | TAF14         | YNR023W                 | SNF12         |
| YGR241C                                          | YAP1802       | YCR088W                 | ABP1          |
| YGR261C                                          | APL6          | YPL105C                 | YPL105C       |
| YCL037C                                          | SRO9          | YDR207C                 | UME6          |
| YPL001W                                          | HAT1          | YNL031C                 | HHT2          |
| YBR041W                                          | FAT1          | YPL161C                 | BEM4          |



| Predictions at threshold level 0.85 continued... |               |                         |               |
|--------------------------------------------------|---------------|-------------------------|---------------|
| Gene1 of predicted pair                          |               | Gene2 of predicted pair |               |
| Systematic Name                                  | Standard Name | Systematic Name         | Standard Name |
| YLR240W                                          | VPS34         | YCR088W                 | ABP1          |
| YJL106W                                          | IME2          | YJR094C                 | IME1          |
| YLR386W                                          | VAC14         | YDR358W                 | GGA1          |
| YGL033W                                          | HOP2          | YNL041C                 | COG6          |
| YOR005C                                          | DNL4          | YCR014C                 | POL4          |
| YNL094W                                          | APP1          | YKR030W                 | GMH1          |
| YDR363W-A                                        | SEM1          | YAL002W                 | VPS8          |
| YFR024C-A                                        | LSB3          | YKR030W                 | GMH1          |
| YPL024W                                          | RMI1          | YGL163C                 | RAD54         |
| YMR172W                                          | HOT1          | YOL067C                 | RTG1          |
| YBR107C                                          | IML3          | YAL002W                 | VPS8          |
| YNL166C                                          | BNI5          | YPL018W                 | CTF19         |
| YGL161C                                          | YIP5          | YDR310C                 | SUM1          |
| YGL135W                                          | RPL1B         | YLR360W                 | VPS38         |
| YML115C                                          | VAN1          | YBR041W                 | FAT1          |
| YPL042C                                          | SSN3          | YJL089W                 | SIP4          |
| YLR399C                                          | BDF1          | YOR141C                 | ARP8          |
| YGR105W                                          | VMA21         | YKL080W                 | VMA5          |
| YLR447C                                          | VMA6          | YPL234C                 | TFP3          |
| YEL009C                                          | GCN4          | YOR298C-A               | MBF1          |
| YLR370C                                          | ARC18         | YPR119W                 | CLB2          |
| YOR132W                                          | VPS17         | YJR058C                 | APS2          |
| YGL223C                                          | COG1          | YML001W                 | YPT7          |
| YPL042C                                          | SSN3          | YDR289C                 | RTT103        |
| YKL101W                                          | HSL1          | YGR188C                 | BUB1          |
| YAR014C                                          | BUD14         | YER122C                 | GLO3          |
| YNL259C                                          | ATX1          | YDR270W                 | CCC2          |
| YOR033C                                          | EXO1          | YGL175C                 | SAE2          |
| YLR234W                                          | TOP3          | YML016C                 | PPZ1          |

| Predictions at threshold level 0.85 continued... |               |                         |               |
|--------------------------------------------------|---------------|-------------------------|---------------|
| Gene1 of predicted pair                          |               | Gene2 of predicted pair |               |
| Systematic Name                                  | Standard Name | Systematic Name         | Standard Name |
| YDR176W                                          | NGG1          | YBL005W                 | PDR3          |
| YNL329C                                          | PEX6          | YKL041W                 | VPS24         |
| YNL025C                                          | SSN8          | YNL236W                 | SIN4          |
| YGR129W                                          | SYF2          | YKL074C                 | MUD2          |
| YKL007W                                          | CAP1          | YLR216C                 | CPR6          |
| YML095C                                          | RAD10         | YGL031C                 | RPL24A        |
| YNL307C                                          | MCK1          | YJL095W                 | BCK1          |
| YPL246C                                          | RBD2          | YHR016C                 | YSC84         |
| YLR399C                                          | BDF1          | YNL107W                 | YAF9          |
| YDR165W                                          | TRM82         | YDL201W                 | TRM8          |
| YHR060W                                          | VMA22         | YPL234C                 | TFP3          |
| YKL130C                                          | SHE2          | YKL185W                 | ASH1          |
| YDL213C                                          | NOP6          | YOR078W                 | BUD21         |
| YBR200W                                          | BEM1          | YMR109W                 | MYO5          |
| YPL129W                                          | TAF14         | YLR176C                 | RFX1          |
| YDR320C                                          | SWA2          | YDL226C                 | GCS1          |
| YLR386W                                          | VAC14         | YKR035W-A               | DID2          |
| YDR260C                                          | SWM1          | YPL018W                 | CTF19         |
| YFL023W                                          | BUD27         | YPL137C                 | GIP3          |
| YLR313C                                          | SPH1          | YBR082C                 | UBC4          |
| YBR138C                                          | YBR138C       | YGR223C                 | HSV2          |
| YBR127C                                          | VMA2          | YMR054W                 | STV1          |
| YPL256C                                          | CLN2          | YKL101W                 | HSL1          |
| YGL223C                                          | COG1          | YEL036C                 | ANP1          |
| YGL066W                                          | SGF73         | YDR254W                 | CHL4          |
| YHR134W                                          | WSS1          | YOR080W                 | DIA2          |
| YNL004W                                          | HRB1          | YCL011C                 | GBP2          |
| YGL161C                                          | YIP5          | YNL107W                 | YAF9          |
| YEL053C                                          | MAK10         | YJL004C                 | SYS1          |

| Predictions at threshold level 0.85 continued... |               |                         |               |
|--------------------------------------------------|---------------|-------------------------|---------------|
| Gene1 of predicted pair                          |               | Gene2 of predicted pair |               |
| Systematic Name                                  | Standard Name | Systematic Name         | Standard Name |
| YHR152W                                          | SPO12         | YDL047W                 | SIT4          |
| YGR239C                                          | PEX21         | YGL153W                 | PEX14         |
| YLR192C                                          | HCR1          | YLR441C                 | RPS1A         |
| YHL031C                                          | GOS1          | YDR080W                 | VPS41         |
| YIL034C                                          | CAP2          | YAL002W                 | VPS8          |
| YBR127C                                          | VMA2          | YEL027W                 | CUP5          |
| YLR386W                                          | VAC14         | YOR023C                 | AHC1          |
| YIR005W                                          | IST3          | YPR046W                 | MCM16         |
| YJL036W                                          | SNX4          | YAL030W                 | SNC1          |
| YPL042C                                          | SSN3          | YOL091W                 | SPO21         |
| YMR109W                                          | MYO5          | YKL213C                 | DOA1          |
| YDR092W                                          | UBC13         | YLR032W                 | RAD5          |
| YIL159W                                          | BNR1          | YMR026C                 | PEX12         |
| YMR273C                                          | ZDS1          | YHR061C                 | GIC1          |
| YGL163C                                          | RAD54         | YDR076W                 | RAD55         |
| YAL024C                                          | LTE1          | YKL048C                 | ELM1          |
| YNL243W                                          | SLA2          | YPL024W                 | RMI1          |
| YDR123C                                          | INO2          | YPL248C                 | GAL4          |
| YDR142C                                          | PEX7          | YDL065C                 | PEX19         |
| YDR244W                                          | PEX5          | YOL044W                 | PEX15         |
| YIL034C                                          | CAP2          | YHL002W                 | HSE1          |
| YCL010C                                          | SGF29         | YGR252W                 | GCN5          |
| YDL155W                                          | CLB3          | YLR131C                 | ACE2          |
| YHR161C                                          | YAP1801       | YOR327C                 | SNC2          |
| YDL116W                                          | NUP84         | YML112W                 | CTK3          |
| YBR200W                                          | BEM1          | YMR032W                 | HOF1          |
| YGR105W                                          | VMA21         | YAL002W                 | VPS8          |
| YDR101C                                          | ARX1          | YKL068W                 | NUP100        |
| YKL048C                                          | ELM1          | YJL157C                 | FAR1          |

| Predictions at threshold level 0.85 continued... |               |                         |               |
|--------------------------------------------------|---------------|-------------------------|---------------|
| Gene1 of predicted pair                          |               | Gene2 of predicted pair |               |
| Systematic Name                                  | Standard Name | Systematic Name         | Standard Name |
| YPL115C                                          | BEM3          | YDL155W                 | CLB3          |
| YHR185C                                          | PFS1          | YIL007C                 | NAS2          |
| YDL005C                                          | MED2          | YCR084C                 | TUP1          |
| YLR360W                                          | VPS38         | YOR036W                 | PEP12         |
| YPR084W                                          | YPR084W       | YKL213C                 | DOA1          |
| YFL003C                                          | MSH4          | YLR394W                 | CST9          |
| YOR132W                                          | VPS17         | YKR030W                 | GMH1          |
| YNL116W                                          | DMA2          | YHR115C                 | DMA1          |
| YCR002C                                          | CDC10         | YDR507C                 | GIN4          |
| YLR181C                                          | VTA1          | YKR035W-A               | DID2          |
| YNL032W                                          | SIW14         | YLR398C                 | SKI2          |
| YPR167C                                          | MET16         | YML028W                 | TSA1          |
| YCL037C                                          | SRO9          | YJL004C                 | SYS1          |
| YGR104C                                          | SRB5          | YJL124C                 | LSM1          |
| YLR191W                                          | PEX13         | YDR244W                 | PEX5          |
| YPL129W                                          | TAF14         | YHL025W                 | SNF6          |
| YDR378C                                          | LSM6          | YKL048C                 | ELM1          |
| YGR241C                                          | YAP1802       | YBL047C                 | EDE1          |
| YBR200W                                          | BEM1          | YBR114W                 | RAD16         |
| YKL135C                                          | APL2          | YJR058C                 | APS2          |
| YNR064C                                          | YNR064C       | YOL108C                 | INO4          |
| YER044C                                          | ERG28         | YLR398C                 | SKI2          |
| YDL002C                                          | NHP10         | YOR308C                 | SNU66         |
| YLR360W                                          | VPS38         | YPL161C                 | BEM4          |
| YGL133W                                          | ITC1          | YHR152W                 | SPO12         |
| YOR001W                                          | RRP6          | YMR125W                 | STO1          |
| YNL041C                                          | COG6          | YML071C                 | COG8          |
| YDR379W                                          | RGA2          | YJL187C                 | SWE1          |
| YEL043W                                          | YEL043W       | YJL004C                 | SYS1          |

| Predictions at threshold level 0.85 continued... |               |                         |               |
|--------------------------------------------------|---------------|-------------------------|---------------|
| Gene1 of predicted pair                          |               | Gene2 of predicted pair |               |
| Systematic Name                                  | Standard Name | Systematic Name         | Standard Name |
| YOR080W                                          | DIA2          | YNL016W                 | PUB1          |
| YHR114W                                          | BZZ1          | YHL002W                 | HSE1          |
| YLR362W                                          | STE11         | YDL159W                 | STE7          |
| YHL031C                                          | GOS1          | YDR245W                 | MNN10         |
| YPR120C                                          | CLB5          | YDL155W                 | CLB3          |
| YMR091C                                          | NPL6          | YLR357W                 | RSC2          |
| YOL013C                                          | HRD1          | YMR022W                 | UBC7          |
| YOR212W                                          | STE4          | YDR183W                 | PLP1          |
| YJR021C                                          | REC107        | YMR133W                 | REC114        |
| YGR133W                                          | PEX4          | YKR020W                 | VPS51         |
| YMR179W                                          | SPT21         | YDL047W                 | SIT4          |
| YFR021W                                          | ATG18         | YPR119W                 | CLB2          |
| YDR225W                                          | HTA1          | YNL030W                 | HHF2          |
| YBL078C                                          | ATG8          | YNR007C                 | ATG3          |
| YFR024C-A                                        | LSB3          | YGR268C                 | HUA1          |
| YER087C-B                                        | SBH1          | YGL226C-A               | OST5          |
| YDR156W                                          | RPA14         | YML016C                 | PPZ1          |
| YGL212W                                          | VAM7          | YKR020W                 | VPS51         |
| YLR170C                                          | APS1          | YKL135C                 | APL2          |
| YDL042C                                          | SIR2          | YDR227W                 | SIR4          |
| YLR144C                                          | ACF2          | YOR284W                 | HUA2          |
| YJL172W                                          | CPS1          | YGL115W                 | SNF4          |
| YBR112C                                          | CYC8          | YPR068C                 | HOS1          |
| YDL155W                                          | CLB3          | YKL101W                 | HSL1          |
| YNL253W                                          | TEX1          | YHR167W                 | THP2          |
| YNL333W                                          | SNZ2          | YMR096W                 | SNZ1          |
| YDL002C                                          | NHP10         | YHR200W                 | RPN10         |
| YDR285W                                          | ZIP1          | YLR394W                 | CST9          |
| YIL053W                                          | RHR2          | YGL033W                 | HOP2          |

| Predictions at threshold level 0.85 continued... |               |                         |               |
|--------------------------------------------------|---------------|-------------------------|---------------|
| Gene1 of predicted pair                          |               | Gene2 of predicted pair |               |
| Systematic Name                                  | Standard Name | Systematic Name         | Standard Name |
| YMR198W                                          | CIK1          | YBR171W                 | SEC66         |
| YPL042C                                          | SSN3          | YEL013W                 | VAC8          |
| YJL183W                                          | MNN11         | YKL041W                 | VPS24         |
| YHL031C                                          | GOS1          | YML001W                 | YPT7          |
| YJL122W                                          | ALB1          | YDR101C                 | ARX1          |
| YPR017C                                          | DSS4          | YNR049C                 | MSO1          |
| YML115C                                          | VAN1          | YAL002W                 | VPS8          |
| YJR094C                                          | IME1          | YDR207C                 | UME6          |
| YDR225W                                          | HTA1          | YDR318W                 | MCM21         |
| YOR008C                                          | SLG1          | YEL036C                 | ANP1          |
| YGL135W                                          | RPL1B         | YDR129C                 | SAC6          |
| YHR156C                                          | LIN1          | YNL307C                 | MCK1          |
| YDL006W                                          | PTC1          | YER118C                 | SHO1          |
| YIL132C                                          | CSM2          | YHL006C                 | SHU1          |
| YOR270C                                          | VPH1          | YGR020C                 | VMA7          |
| YNL291C                                          | MID1          | YPR046W                 | MCM16         |
| YGL212W                                          | VAM7          | YBR171W                 | SEC66         |
| YOR127W                                          | RGA1          | YDR379W                 | RGA2          |
| YKR020W                                          | VPS51         | YJL117W                 | PHO86         |
| YCL027W                                          | FUS1          | YPR119W                 | CLB2          |
| YKL213C                                          | DOA1          | YOR124C                 | UBP2          |
| YGR104C                                          | SRB5          | YPL129W                 | TAF14         |
| YBR108W                                          | YBR108W       | YEL060C                 | PRB1          |
| YMR042W                                          | ARG80         | YDR207C                 | UME6          |
| YDR004W                                          | RAD57         | YPL024W                 | RMI1          |
| YNL106C                                          | INP52         | YGR072W                 | UPF3          |
| YLR043C                                          | TRX1          | YOR106W                 | VAM3          |
| YKR001C                                          | VPS1          | YJL004C                 | SYS1          |
| YML115C                                          | VAN1          | YNR072W                 | HXT17         |

| Predictions at threshold level 0.85 continued... |               |                         |               |
|--------------------------------------------------|---------------|-------------------------|---------------|
| Gene1 of predicted pair                          |               | Gene2 of predicted pair |               |
| Systematic Name                                  | Standard Name | Systematic Name         | Standard Name |
| YMR026C                                          | PEX12         | YNL214W                 | PEX17         |
| YNL153C                                          | GIM3          | YHR056C                 | RSC30         |
| YBR200W                                          | BEM1          | YBR260C                 | RGD1          |
| YDR245W                                          | MNN10         | YCR088W                 | ABP1          |
| YDR156W                                          | RPA14         | YKL139W                 | CTK1          |
| YFR031C-A                                        | RPL2A         | YGL054C                 | ERV14         |
| YOR275C                                          | RIM20         | YDL006W                 | PTC1          |
| YBR188C                                          | NTC20         | YPL213W                 | LEA1          |
| YDL116W                                          | NUP84         | YFR036W                 | CDC26         |
| YPL161C                                          | BEM4          | YGR152C                 | RSR1          |
| YDL002C                                          | NHP10         | YEL056W                 | HAT2          |
| YIL076W                                          | SEC28         | YER122C                 | GLO3          |
| YDL190C                                          | UFD2          | YMR276W                 | DSK2          |
| YML095C                                          | RAD10         | YOR368W                 | RAD17         |
| YKL139W                                          | CTK1          | YML006C                 | GIS4          |
| YDL116W                                          | NUP84         | YJL124C                 | LSM1          |
| YCL001W                                          | RER1          | YKR020W                 | VPS51         |
| YJL183W                                          | MNN11         | YFL048C                 | EMP47         |
| YER115C                                          | SPR6          | YFL047W                 | RGD2          |
| YMR068W                                          | AVO2          | YBR270C                 | BIT2          |
| YCR038C                                          | BUD5          | YPR122W                 | AXL1          |
| YJL124C                                          | LSM1          | YGL115W                 | SNF4          |
| YDR293C                                          | SSD1          | YJL036W                 | SNX4          |
| YJR090C                                          | GRR1          | YDR207C                 | UME6          |
| YIL113W                                          | SDP1          | YOR208W                 | PTP2          |
| YDR176W                                          | NGG1          | YGR252W                 | GCN5          |
| YPL129W                                          | TAF14         | YBR009C                 | HHF1          |
| YDR293C                                          | SSD1          | YKR001C                 | VPS1          |
| YNL288W                                          | CAF40         | YJR135C                 | MCM22         |

| Predictions at threshold level 0.85 continued... |               |                         |               |
|--------------------------------------------------|---------------|-------------------------|---------------|
| Gene1 of predicted pair                          |               | Gene2 of predicted pair |               |
| Systematic Name                                  | Standard Name | Systematic Name         | Standard Name |
| YNL145W                                          | MFA2          | YCR077C                 | PAT1          |
| YDR101C                                          | ARX1          | YHR052W                 | CIC1          |
| YML109W                                          | ZDS2          | YPR119W                 | CLB2          |
| YNL078W                                          | NIS1          | YCL024W                 | KCC4          |
| YHR156C                                          | LIN1          | YJL095W                 | BCK1          |
| YBR108W                                          | YBR108W       | YER040W                 | GLN3          |
| YFR024C-A                                        | LSB3          | YHR016C                 | YSC84         |
| YLR306W                                          | UBC12         | YDR139C                 | RUB1          |
| YDR176W                                          | NGG1          | YGL066W                 | SGF73         |
| YFL023W                                          | BUD27         | YHR010W                 | RPL27A        |
| YNL291C                                          | MID1          | YDR254W                 | CHL4          |
| YNL243W                                          | SLA2          | YDR388W                 | RVS167        |
| YAL024C                                          | LTE1          | YKR099W                 | BAS1          |
| YER044C-A                                        | MEI4          | YHR086W                 | NAM8          |
| YPR101W                                          | SNT309        | YDR378C                 | LSM6          |
| YPL234C                                          | TFP3          | YEL051W                 | VMA8          |
| YGR040W                                          | KSS1          | YDR103W                 | STE5          |
| YNL307C                                          | MCK1          | YPL152W                 | RRD2          |
| YLR234W                                          | TOP3          | YLR320W                 | MMS22         |
| YML016C                                          | PPZ1          | YDL047W                 | SIT4          |
| YPR017C                                          | DSS4          | YNL041C                 | COG6          |
| YOR127W                                          | RGA1          | YJR090C                 | GRR1          |
| YHR161C                                          | YAP1801       | YHR108W                 | GGA2          |
| YLR079W                                          | SIC1          | YDL226C                 | GCS1          |
| YBL058W                                          | SHP1          | YDR137W                 | RGP1          |
| YGR081C                                          | SLX9          | YDL059C                 | RAD59         |
| YOR080W                                          | DIA2          | YMR202W                 | ERG2          |
| YHR013C                                          | ARD1          | YMR089C                 | YTA12         |
| YPL195W                                          | APL5          | YOL018C                 | TLG2          |



| Predictions at threshold level 0.85 continued... |               |                         |               |
|--------------------------------------------------|---------------|-------------------------|---------------|
| Gene1 of predicted pair                          |               | Gene2 of predicted pair |               |
| Systematic Name                                  | Standard Name | Systematic Name         | Standard Name |
| YLL039C                                          | UBI4          | YNR006W                 | VPS27         |
| YGL033W                                          | HOP2          | YBR036C                 | CSG2          |
| YGL033W                                          | HOP2          | YDL223C                 | HBT1          |
| YMR026C                                          | PEX12         | YNR072W                 | HXT17         |
| YPR017C                                          | DSS4          | YNL293W                 | MSB3          |
| YLR064W                                          | YLR064W       | YKR030W                 | GMH1          |
| YMR109W                                          | MYO5          | YOR358W                 | HAP5          |
| YBL078C                                          | ATG8          | YGL212W                 | VAM7          |
| YHR012W                                          | VPS29         | YHR114W                 | BZZ1          |
| YLR170C                                          | APS1          | YOR109W                 | INP53         |
| YNL199C                                          | GCR2          | YPL256C                 | CLN2          |
| YJL154C                                          | VPS35         | YDR245W                 | MNN10         |
| YJL151C                                          | SNA3          | YLR064W                 | YLR064W       |
| YOR270C                                          | VPH1          | YPL234C                 | TFP3          |
| YGR054W                                          | YGR054W       | YPR163C                 | TIF3          |
| YLR102C                                          | APC9          | YPL256C                 | CLN2          |
| YIL076W                                          | SEC28         | YOR066W                 | MSA1          |
| YPR052C                                          | NHP6A         | YLR357W                 | RSC2          |
| YDR293C                                          | SSD1          | YHR178W                 | STB5          |
| YGL223C                                          | COG1          | YDR153C                 | ENT5          |
| YHR161C                                          | YAP1801       | YJR125C                 | ENT3          |
| YLR234W                                          | TOP3          | YBR215W                 | HPC2          |
| YMR026C                                          | PEX12         | YBR030W                 | YBR030W       |
| YDR293C                                          | SSD1          | YDL155W                 | CLB3          |
| YML115C                                          | VAN1          | YJL117W                 | PHO86         |
| YDL155W                                          | CLB3          | YJR090C                 | GRR1          |
| YNL044W                                          | YIP3          | YPR028W                 | YOP1          |
| YBR200W                                          | BEM1          | YNL293W                 | MSB3          |
| YLL039C                                          | UBI4          | YKL041W                 | VPS24         |

| Predictions at threshold level 0.85 continued... |               |                         |               |
|--------------------------------------------------|---------------|-------------------------|---------------|
| Gene1 of predicted pair                          |               | Gene2 of predicted pair |               |
| Systematic Name                                  | Standard Name | Systematic Name         | Standard Name |
| YPR036W                                          | VMA13         | YMR054W                 | STV1          |
| YNL186W                                          | UBP10         | YPR119W                 | CLB2          |
| YDR378C                                          | LSM6          | YDR289C                 | RTT103        |
| YLR360W                                          | VPS38         | YCR088W                 | ABP1          |
| YNL094W                                          | APP1          | YCR088W                 | ABP1          |
| YKR072C                                          | SIS2          | YLR135W                 | SLX4          |
| YDR265W                                          | PEX10         | YOL044W                 | PEX15         |
| YNL025C                                          | SSN8          | YDR477W                 | SNF1          |
| YER087C-B                                        | SBH1          | YML019W                 | OST6          |
| YOR033C                                          | EXO1          | YGL100W                 | SEH1          |
| YLR360W                                          | VPS38         | YDR323C                 | PEP7          |
| YLR135W                                          | SLX4          | YPL079W                 | RPL21B        |
| YNL238W                                          | KEX2          | YNL051W                 | COG5          |
| YLR079W                                          | SIC1          | YKL048C                 | ELM1          |
| YBR289W                                          | SNF5          | YOR038C                 | HIR2          |
| YGR108W                                          | CLB1          | YAL002W                 | VPS8          |
| YOR083W                                          | WHI5          | YPL018W                 | CTF19         |
| YLR135W                                          | SLX4          | YGL031C                 | RPL24A        |
| YMR116C                                          | ASC1          | YGR135W                 | PRE9          |
| YHL020C                                          | OPI1          | YDR153C                 | ENT5          |
| YDR443C                                          | SSN2          | YNL079C                 | TPM1          |
| YBR041W                                          | FAT1          | YKR046C                 | PET10         |
| YBR273C                                          | UBX7          | YJL048C                 | UBX6          |
| YLL039C                                          | UBI4          | YBL047C                 | EDE1          |
| YJL176C                                          | SWI3          | YOR290C                 | SNF2          |
| YNL215W                                          | IES2          | YDR245W                 | MNN10         |
| YIL076W                                          | SEC28         | YOL018C                 | TLG2          |
| YHR056C                                          | RSC30         | YLR357W                 | RSC2          |
| YGL100W                                          | SEH1          | YKL068W                 | NUP100        |

| Predictions at threshold level 0.85 continued... |               |                         |               |
|--------------------------------------------------|---------------|-------------------------|---------------|
| Gene1 of predicted pair                          |               | Gene2 of predicted pair |               |
| Systematic Name                                  | Standard Name | Systematic Name         | Standard Name |
| YDR142C                                          | PEX7          | YLL061W                 | MMP1          |
| YDR080W                                          | VPS41         | YNL051W                 | COG5          |
| YNL051W                                          | COG5          | YEL042W                 | GDA1          |
| YMR055C                                          | BUB2          | YPL161C                 | BEM4          |
| YGL178W                                          | MPT5          | YGL003C                 | CDH1          |
| YER161C                                          | SPT2          | YBR009C                 | HHF1          |
| YLR386W                                          | VAC14         | YDL223C                 | HBT1          |
| YDR129C                                          | SAC6          | YHL027W                 | RIM101        |
| YDR085C                                          | AFR1          | YBL085W                 | BOI1          |
| YCR081W                                          | SRB8          | YGL025C                 | PGD1          |
| YBR127C                                          | VMA2          | YHR060W                 | VMA22         |
| YBR111W-A                                        | SUS1          | YDR159W                 | SAC3          |
| YGR249W                                          | MGA1          | YPL203W                 | TPK2          |
| YLR119W                                          | SRN2          | YJL172W                 | CPS1          |
| YFR024C-A                                        | LSB3          | YOR284W                 | HUA2          |
| YHR086W                                          | NAM8          | YJR021C                 | REC107        |
| YIL076W                                          | SEC28         | YPR032W                 | SRO7          |
| YPL195W                                          | APL5          | YDL077C                 | VAM6          |
| YFL066C                                          | YFL066C       | YNL147W                 | LSM7          |
| YDR440W                                          | DOT1          | YBR010W                 | HHT1          |
| YBR258C                                          | SHG1          | YOL145C                 | CTR9          |
| YHR119W                                          | SET1          | YBR258C                 | SHG1          |
| YHR200W                                          | RPN10         | YJR135C                 | MCM22         |
| YGL246C                                          | RAI1          | YDR025W                 | RPS11A        |
| YBL046W                                          | PSY4          | YPR040W                 | TIP41         |
| YBR019C                                          | GAL10         | YNL076W                 | MKS1          |
| YHR134W                                          | WSS1          | YOR132W                 | VPS17         |
| YML115C                                          | VAN1          | YER001W                 | MNN1          |
| YBR173C                                          | UMP1          | YLR192C                 | HCR1          |

| Predictions at threshold level 0.85 continued... |               |                         |               |
|--------------------------------------------------|---------------|-------------------------|---------------|
| Gene1 of predicted pair                          |               | Gene2 of predicted pair |               |
| Systematic Name                                  | Standard Name | Systematic Name         | Standard Name |
| YGL180W                                          | ATG1          | YPR185W                 | ATG13         |
| YIL076W                                          | SEC28         | YDR137W                 | RGP1          |
| YOR132W                                          | VPS17         | YKR001C                 | VPS1          |
| YBR258C                                          | SHG1          | YOR156C                 | NFI1          |
| YER115C                                          | SPR6          | YML109W                 | ZDS2          |
| YML058W                                          | SML1          | YBL088C                 | TEL1          |
| YPR049C                                          | ATG11         | YGL180W                 | ATG1          |
| YDL116W                                          | NUP84         | YLR386W                 | VAC14         |
| YFL013C                                          | IES1          | YPL129W                 | TAF14         |
| YDL227C                                          | HO            | YLL013C                 | PUF3          |
| YLR386W                                          | VAC14         | YDR378C                 | LSM6          |
| YFL031W                                          | HAC1          | YOR036W                 | PEP12         |
| YBL102W                                          | SFT2          | YER122C                 | GLO3          |
| YPR101W                                          | SNT309        | YPL213W                 | LEA1          |
| YOR195W                                          | SLK19         | YBR200W                 | BEM1          |
| YNL166C                                          | BNI5          | YMR055C                 | BUB2          |
| YFR010W                                          | UBP6          | YPR120C                 | CLB5          |
| YDL020C                                          | RPN4          | YPL161C                 | BEM4          |
| YDR137W                                          | RGP1          | YMR311C                 | GLC8          |
| YPL115C                                          | BEM3          | YDR379W                 | RGA2          |
| YNL199C                                          | GCR2          | YNL079C                 | TPM1          |
| YDR071C                                          | PAA1          | YBR010W                 | HHT1          |
| YLR447C                                          | VMA6          | YPR046W                 | MCM16         |
| YNL325C                                          | FIG4          | YML001W                 | YPT7          |
| YER059W                                          | PCL6          | YPL219W                 | PCL8          |
| YNL031C                                          | HHT2          | YBR009C                 | HHF1          |
| YDR176W                                          | NGG1          | YBL003C                 | HTA2          |
| YKL048C                                          | ELM1          | YPL152W                 | RRD2          |
| YGR184C                                          | UBR1          | YHR013C                 | ARD1          |

| Predictions at threshold level 0.85 continued... |               |                         |               |
|--------------------------------------------------|---------------|-------------------------|---------------|
| Gene1 of predicted pair                          |               | Gene2 of predicted pair |               |
| Systematic Name                                  | Standard Name | Systematic Name         | Standard Name |
| YOL062C                                          | APM4          | YJR058C                 | APS2          |
| YDR254W                                          | CHL4          | YIR005W                 | IST3          |
| YGL115W                                          | SNF4          | YDR153C                 | ENT5          |
| YBR108W                                          | YBR108W       | YMR127C                 | SAS2          |
| YLR043C                                          | TRX1          | YLR396C                 | VPS33         |
| YDR443C                                          | SSN2          | YCR084C                 | TUP1          |
| YGR072W                                          | UPF3          | YJL036W                 | SNX4          |
| YBR108W                                          | YBR108W       | YNL238W                 | KEX2          |
| YEL056W                                          | HAT2          | YNL107W                 | YAF9          |
| YHR052W                                          | CIC1          | YIL133C                 | RPL16A        |
| YNL032W                                          | SIW14         | YDL184C                 | RPL41A        |
| YKR059W                                          | TIF1          | YLR234W                 | TOP3          |
| YBR217W                                          | ATG12         | YPL149W                 | ATG5          |
| YPR167C                                          | MET16         | YGR209C                 | TRX2          |
| YOR033C                                          | EXO1          | YBR082C                 | UBC4          |
| YNL139C                                          | RLR1          | YNL004W                 | HRB1          |
| YGL033W                                          | HOP2          | YGR249W                 | MGA1          |
| YBR200W                                          | BEM1          | YEL043W                 | YEL043W       |
| YFR010W                                          | UBP6          | YDR254W                 | CHL4          |
| YLR093C                                          | NYV1          | YEL036C                 | ANP1          |
| YPL140C                                          | MKK2          | YLR313C                 | SPH1          |
| YGR072W                                          | UPF3          | YIL076W                 | SEC28         |
| YJR140C                                          | HIR3          | YFR021W                 | ATG18         |
| YDL223C                                          | HBT1          | YEL036C                 | ANP1          |
| YMR224C                                          | MRE11         | YJL176C                 | SWI3          |
| YCR020C-A                                        | MAK31         | YPL105C                 | YPL105C       |
| YHR216W                                          | IMD2          | YGR262C                 | BUD32         |
| YLR315W                                          | NKP2          | YPL018W                 | CTF19         |
| YDR181C                                          | SAS4          | YOR213C                 | SAS5          |

| Predictions at threshold level 0.85 continued... |               |                         |               |
|--------------------------------------------------|---------------|-------------------------|---------------|
| Gene1 of predicted pair                          |               | Gene2 of predicted pair |               |
| Systematic Name                                  | Standard Name | Systematic Name         | Standard Name |
| YGR020C                                          | VMA7          | YMR054W                 | STV1          |
| YEL009C                                          | GCN4          | YDL005C                 | MED2          |
| YBR107C                                          | IML3          | YPR119W                 | CLB2          |
| YBR215W                                          | HPC2          | YDR137W                 | RGP1          |
| YBR200W                                          | BEM1          | YJL172W                 | CPS1          |
| YMR142C                                          | RPL13B        | YEL060C                 | PRB1          |
| YLR234W                                          | TOP3          | YML095C                 | RAD10         |
| YGL178W                                          | MPT5          | YPR120C                 | CLB5          |
| YDL216C                                          | RRI1          | YMR025W                 | CSI1          |
| YDR174W                                          | HMO1          | YAR014C                 | BUD14         |
| YCL037C                                          | SRO9          | YHR060W                 | VMA22         |
| YDL116W                                          | NUP84         | YMR153W                 | NUP53         |
| YPL115C                                          | BEM3          | YDR309C                 | GIC2          |
| YER001W                                          | MNN1          | YPL050C                 | MNN9          |
| YGL060W                                          | YBP2          | YML007W                 | YAP1          |
| YNL329C                                          | PEX6          | YBL025W                 | RRN10         |
| YOL148C                                          | SPT20         | YNL107W                 | YAF9          |
| YMR224C                                          | MRE11         | YPR046W                 | MCM16         |
| YMR164C                                          | MSS11         | YPL256C                 | CLN2          |
| YGR104C                                          | SRB5          | YOL145C                 | CTR9          |
| YOL018C                                          | TLG2          | YNR032W                 | PPG1          |
| YDR320C                                          | SWA2          | YER162C                 | RAD4          |
| YOR195W                                          | SLK19         | YDR289C                 | RTT103        |
| YDR309C                                          | GIC2          | YNL293W                 | MSB3          |
| YOR076C                                          | SKI7          | YOR001W                 | RRP6          |
| YGL025C                                          | PGD1          | YNL031C                 | HHT2          |
| YLR061W                                          | RPL22A        | YLR360W                 | VPS38         |
| YDL106C                                          | PHO2          | YDR146C                 | SWI5          |
| YDR448W                                          | ADA2          | YBR111W-A               | SUS1          |

| Predictions at threshold level 0.85 continued... |               |                         |               |
|--------------------------------------------------|---------------|-------------------------|---------------|
| Gene1 of predicted pair                          |               | Gene2 of predicted pair |               |
| Systematic Name                                  | Standard Name | Systematic Name         | Standard Name |
| YDL216C                                          | RRI1          | YJR084W                 | CSN12         |
| YML071C                                          | COG8          | YJL183W                 | MNN11         |
| YKL048C                                          | ELM1          | YGL003C                 | CDH1          |
| YHR013C                                          | ARD1          | YOR035C                 | SHE4          |
| YEL009C                                          | GCN4          | YDR225W                 | HTA1          |
| YNR052C                                          | POP2          | YNL206C                 | RTT106        |
| YKR059W                                          | TIF1          | YBR215W                 | HPC2          |
| YPL115C                                          | BEM3          | YHR061C                 | GIC1          |
| YDR448W                                          | ADA2          | YBR010W                 | HHT1          |
| YDR129C                                          | SAC6          | YMR116C                 | ASC1          |
| YPR046W                                          | MCM16         | YPL018W                 | CTF19         |
| YJR040W                                          | GEF1          | YNL051W                 | COG5          |
| YBR172C                                          | SMY2          | YKL074C                 | MUD2          |
| YPR084W                                          | YPR084W       | YDR137W                 | RGP1          |
| YPL018W                                          | CTF19         | YAL002W                 | VPS8          |
| YHL025W                                          | SNF6          | YER161C                 | SPT2          |
| YNL297C                                          | MON2          | YER122C                 | GLO3          |
| YNL218W                                          | MGS1          | YLR135W                 | SLX4          |
| YBL008W                                          | HIR1          | YEL056W                 | HAT2          |
| YOR043W                                          | WHI2          | YMR037C                 | MSN2          |
| YFR024C-A                                        | LSB3          | YPR171W                 | BSP1          |
| YIR009W                                          | MSL1          | YBR114W                 | RAD16         |
| YDR309C                                          | GIC2          | YCR086W                 | CSM1          |
| YIL076W                                          | SEC28         | YJL036W                 | SNX4          |
| YKL130C                                          | SHE2          | YBR130C                 | SHE3          |
| YPR154W                                          | PIN3          | YPR119W                 | CLB2          |
| YEL015W                                          | EDC3          | YBL066C                 | SEF1          |
| YOR023C                                          | AHC1          | YBR114W                 | RAD16         |
| YKL197C                                          | PEX1          | YNL329C                 | PEX6          |

| Predictions at threshold level 0.85 continued... |               |                         |               |
|--------------------------------------------------|---------------|-------------------------|---------------|
| Gene1 of predicted pair                          |               | Gene2 of predicted pair |               |
| Systematic Name                                  | Standard Name | Systematic Name         | Standard Name |
| YJR032W                                          | CPR7          | YGL019W                 | CKB1          |
| YDL184C                                          | RPL41A        | YJL124C                 | LSM1          |
| YER042W                                          | MXR1          | YML028W                 | TSA1          |
| YNL238W                                          | KEX2          | YDR153C                 | ENT5          |
| YPL050C                                          | MNN9          | YEL036C                 | ANP1          |
| YKL025C                                          | PAN3          | YHR178W                 | STB5          |
| YMR179W                                          | SPT21         | YGR184C                 | UBR1          |
| YGR270W                                          | YTA7          | YEL013W                 | VAC8          |
| YPR154W                                          | PIN3          | YPL249C                 | GYP5          |
| YML115C                                          | VAN1          | YGL212W                 | VAM7          |
| YEL009C                                          | GCN4          | YHL025W                 | SNF6          |
| YNL243W                                          | SLA2          | YPL240C                 | HSP82         |
| YGL249W                                          | ZIP2          | YPR119W                 | CLB2          |
| YLR170C                                          | APS1          | YDL192W                 | ARF1          |
| YKL214C                                          | YRA2          | YML062C                 | MFT1          |
| YOR270C                                          | VPH1          | YDL185W                 | TFP1          |
| YMR311C                                          | GLC8          | YAR014C                 | BUD14         |
| YHR016C                                          | YSC84         | YHR114W                 | BZZ1          |
| YCL029C                                          | BIK1          | YIL033C                 | BCY1          |
| YGL115W                                          | SNF4          | YNL076W                 | MKS1          |
| YNL307C                                          | MCK1          | YJR035W                 | RAD26         |
| YPR084W                                          | YPR084W       | YGR072W                 | UPF3          |
| YPR036W                                          | VMA13         | YHR060W                 | VMA22         |
| YML016C                                          | PPZ1          | YDR155C                 | CPR1          |
| YKL048C                                          | ELM1          | YLR182W                 | SWI6          |
| YKR020W                                          | VPS51         | YOR327C                 | SNC2          |
| YPL246C                                          | RBD2          | YHR114W                 | BZZ1          |
| YGL033W                                          | HOP2          | YMR214W                 | SCJ1          |
| YKR099W                                          | BAS1          | YBR171W                 | SEC66         |



| Predictions at threshold level 0.85 continued... |               |                         |               |
|--------------------------------------------------|---------------|-------------------------|---------------|
| Gene1 of predicted pair                          |               | Gene2 of predicted pair |               |
| Systematic Name                                  | Standard Name | Systematic Name         | Standard Name |
| YMR198W                                          | CIK1          | YLR381W                 | CTF3          |
| YGR056W                                          | RSC1          | YHR056C                 | RSC30         |
| YNR072W                                          | HXT17         | YBL025W                 | RRN10         |
| YBR200W                                          | BEM1          | YJL006C                 | CTK2          |
| YDR245W                                          | MNN10         | YER122C                 | GLO3          |
| YHR178W                                          | STB5          | YGL161C                 | YIP5          |
| YBR127C                                          | VMA2          | YLR447C                 | VMA6          |
| YPL178W                                          | CBC2          | YML057W                 | CMP2          |
| YCL010C                                          | SGF29         | YGL252C                 | RTG2          |
| YOR047C                                          | STD1          | YGL252C                 | RTG2          |
| YGR072W                                          | UPF3          | YHR134W                 | WSS1          |
| YNL215W                                          | IES2          | YOR141C                 | ARP8          |
| YBL008W                                          | HIR1          | YOR290C                 | SNF2          |
| YHL031C                                          | GOS1          | YLR093C                 | NYV1          |
| YDL116W                                          | NUP84         | YBR017C                 | KAP104        |
| YBL016W                                          | FUS3          | YBR083W                 | TEC1          |
| YGL200C                                          | EMP24         | YJL183W                 | MNN11         |
| YBR107C                                          | IML3          | YEL056W                 | HAT2          |
| YLR079W                                          | SIC1          | YBR200W                 | BEM1          |
| YHR200W                                          | RPN10         | YFR036W                 | CDC26         |
| YDL226C                                          | GCS1          | YNL107W                 | YAF9          |
| YKR020W                                          | VPS51         | YKR048C                 | NAP1          |
| YOR332W                                          | VMA4          | YDR202C                 | RAV2          |
| YDR448W                                          | ADA2          | YGL252C                 | RTG2          |
| YCR081W                                          | SRB8          | YOR140W                 | SFL1          |
| YGL158W                                          | RCK1          | YPL058C                 | PDR12         |
| YNL264C                                          | PDR17         | YOR101W                 | RAS1          |
| YDR383C                                          | NKP1          | YFR036W                 | CDC26         |
| YMR224C                                          | MRE11         | YNL079C                 | TPM1          |

| Predictions at threshold level 0.85 continued... |               |                         |               |
|--------------------------------------------------|---------------|-------------------------|---------------|
| Gene1 of predicted pair                          |               | Gene2 of predicted pair |               |
| Systematic Name                                  | Standard Name | Systematic Name         | Standard Name |
| YOR080W                                          | DIA2          | YBR107C                 | IML3          |
| YLR384C                                          | IKI3          | YBL071W-A               | KTI11         |
| YJL172W                                          | CPS1          | YBL103C                 | RTG3          |
| YNL031C                                          | HHT2          | YER068W                 | MOT2          |
| YGR241C                                          | YAP1802       | YJL029C                 | VPS53         |
| YOR371C                                          | GPB1          | YGL121C                 | GPG1          |
| YDR296W                                          | MHR1          | YPL248C                 | GAL4          |
| YGL212W                                          | VAM7          | YPL050C                 | MNN9          |
| YLR399C                                          | BDF1          | YJR060W                 | CBF1          |
| YNL307C                                          | MCK1          | YDR207C                 | UME6          |
| YHR200W                                          | RPN10         | YAL002W                 | VPS8          |
| YMR142C                                          | RPL13B        | YER122C                 | GLO3          |
| YHR160C                                          | PEX18         | YGL153W                 | PEX14         |
| YLR452C                                          | SST2          | YNL147W                 | LSM7          |
| YNL288W                                          | CAF40         | YGL151W                 | NUT1          |
| YEL009C                                          | GCN4          | YPL129W                 | TAF14         |
| YJL154C                                          | VPS35         | YGR105W                 | VMA21         |
| YPL037C                                          | EGD1          | YPL234C                 | TFP3          |
| YER109C                                          | FLO8          | YBR083W                 | TEC1          |
| YMR199W                                          | CLN1          | YML057W                 | CMP2          |
| YIL034C                                          | CAP2          | YDR309C                 | GIC2          |
| YAL024C                                          | LTE1          | YPR120C                 | CLB5          |
| YIL072W                                          | HOP1          | YLR263W                 | RED1          |
| YPL195W                                          | APL5          | YAL002W                 | VPS8          |
| YDR225W                                          | HTA1          | YPR120C                 | CLB5          |
| YDR192C                                          | NUP42         | YMR255W                 | GFD1          |
| YNL329C                                          | PEX6          | YOL044W                 | PEX15         |
| YLR288C                                          | MEC3          | YML095C                 | RAD10         |
| YDR507C                                          | GIN4          | YKR048C                 | NAP1          |

| Predictions at threshold level 0.85 continued... |               |                         |               |
|--------------------------------------------------|---------------|-------------------------|---------------|
| Gene1 of predicted pair                          |               | Gene2 of predicted pair |               |
| Systematic Name                                  | Standard Name | Systematic Name         | Standard Name |
| YOR078W                                          | BUD21         | YHR052W                 | CIC1          |
| YPL115C                                          | BEM3          | YBR108W                 | YBR108W       |
| YBL016W                                          | FUS3          | YLR452C                 | SST2          |
| YGL223C                                          | COG1          | YJL004C                 | SYS1          |
| YOR026W                                          | BUB3          | YIL033C                 | BCY1          |
| YLR135W                                          | SLX4          | YNL016W                 | PUB1          |
| YML062C                                          | MFT1          | YBR111W-A               | SUS1          |
| YOR076C                                          | SKI7          | YGR072W                 | UPF3          |
| YPL019C                                          | VTC3          | YFL004W                 | VTC2          |
| YNL206C                                          | RTT106        | YER110C                 | KAP123        |
| YGR270W                                          | YTA7          | YDR289C                 | RTT103        |
| YLR315W                                          | NKP2          | YDR318W                 | MCM21         |
| YJL106W                                          | IME2          | YPR119W                 | CLB2          |
| YHR195W                                          | NVJ1          | YEL013W                 | VAC8          |
| YMR127C                                          | SAS2          | YLR399C                 | BDF1          |
| YFR031C-A                                        | RPL2A         | YGR072W                 | UPF3          |
| YGL090W                                          | LIF1          | YCR014C                 | POL4          |
| YDR129C                                          | SAC6          | YLR429W                 | CRN1          |
| YLR083C                                          | EMP70         | YML071C                 | COG8          |
| YDR142C                                          | PEX7          | YOL044W                 | PEX15         |
| YDL154W                                          | MSH5          | YLR234W                 | TOP3          |
| YPL024W                                          | RMI1          | YHR134W                 | WSS1          |
| YPL125W                                          | KAP120        | YKL068W                 | NUP100        |
| YOR191W                                          | RIS1          | YCL037C                 | SRO9          |
| YOR080W                                          | DIA2          | YKL160W                 | ELF1          |
| YKR099W                                          | BAS1          | YNL238W                 | KEX2          |
| YOL018C                                          | TLG2          | YLR309C                 | IMH1          |
| YDR358W                                          | GGA1          | YJL183W                 | MNN11         |
| YPL140C                                          | MKK2          | YIL113W                 | SDP1          |

| Predictions at threshold level 0.85 continued... |               |                         |               |
|--------------------------------------------------|---------------|-------------------------|---------------|
| Gene1 of predicted pair                          |               | Gene2 of predicted pair |               |
| Systematic Name                                  | Standard Name | Systematic Name         | Standard Name |
| YDR108W                                          | GSG1          | YOR069W                 | VPS5          |
| YLR191W                                          | PEX13         | YNL214W                 | PEX17         |
| YGR252W                                          | GCN5          | YKR048C                 | NAP1          |
| YMR273C                                          | ZDS1          | YBR010W                 | HHT1          |
| YGL208W                                          | SIP2          | YGL179C                 | TOS3          |
| YIL076W                                          | SEC28         | YER120W                 | SCS2          |
| YIL076W                                          | SEC28         | YCL037C                 | SRO9          |
| YJL095W                                          | BCK1          | YHR114W                 | BZZ1          |
| YPR072W                                          | NOT5          | YJL140W                 | RPB4          |
| YHR187W                                          | IKI1          | YPL101W                 | ELP4          |
| YDR174W                                          | HMO1          | YLR386W                 | VAC14         |
| YGL025C                                          | PGD1          | YGR252W                 | GCN5          |
| YJL124C                                          | LSM1          | YDR378C                 | LSM6          |
| YPL129W                                          | TAF14         | YGL025C                 | PGD1          |
| YGL003C                                          | CDH1          | YDR310C                 | SUM1          |
| YLR399C                                          | BDF1          | YPL248C                 | GAL4          |
| YGL033W                                          | HOP2          | YMR230W                 | RPS10B        |
| YKL020C                                          | SPT23         | YOR124C                 | UBP2          |
| YIL050W                                          | PCL7          | YGR233C                 | PHO81         |
| YHR013C                                          | ARD1          | YDR076W                 | RAD55         |
| YBR111W-A                                        | SUS1          | YPR072W                 | NOT5          |
| YOL091W                                          | SPO21         | YNL225C                 | CNM67         |
| YDL080C                                          | THI3          | YBR240C                 | THI2          |
| YGL212W                                          | VAM7          | YLR396C                 | VPS33         |
| YEL054C                                          | RPL12A        | YGL246C                 | RAI1          |
| YLR360W                                          | VPS38         | YHR205W                 | SCH9          |
| YIL076W                                          | SEC28         | YNL199C                 | GCR2          |
| YLR083C                                          | EMP70         | YKR020W                 | VPS51         |
| YOR106W                                          | VAM3          | YNL051W                 | COG5          |

| Predictions at threshold level 0.85 continued... |               |                         |               |
|--------------------------------------------------|---------------|-------------------------|---------------|
| Gene1 of predicted pair                          |               | Gene2 of predicted pair |               |
| Systematic Name                                  | Standard Name | Systematic Name         | Standard Name |
| YOR080W                                          | DIA2          | YLR315W                 | NKP2          |
| YGR020C                                          | VMA7          | YBR127C                 | VMA2          |
| YML012W                                          | ERV25         | YEL036C                 | ANP1          |
| YOR080W                                          | DIA2          | YDL013W                 | SLX5          |
| YGR241C                                          | YAP1802       | YKR001C                 | VPS1          |
| YPL086C                                          | ELP3          | YBL071W-A               | KTI11         |
| YML115C                                          | VAN1          | YGR133W                 | PEX4          |
| YBR200W                                          | BEM1          | YDR309C                 | GIC2          |
| YFR031C-A                                        | RPL2A         | YKR030W                 | GMH1          |
| YPL050C                                          | MNN9          | YJL183W                 | MNN11         |
| YLR381W                                          | CTF3          | YDR318W                 | MCM21         |
| YGL212W                                          | VAM7          | YML001W                 | YPT7          |
| YGL066W                                          | SGF73         | YNL206C                 | RTT106        |
| YMR179W                                          | SPT21         | YPL018W                 | CTF19         |
| YOR195W                                          | SLK19         | YGL003C                 | CDH1          |
| YPL240C                                          | HSP82         | YGL076C                 | RPL7A         |
| YIL076W                                          | SEC28         | YGL212W                 | VAM7          |
| YMR116C                                          | ASC1          | YBR082C                 | UBC4          |
| YLR234W                                          | TOP3          | YJL095W                 | BCK1          |
| YOL051W                                          | GAL11         | YGR252W                 | GCN5          |
| YMR095C                                          | SNO1          | YER044C                 | ERG28         |
| YNL307C                                          | MCK1          | YDR358W                 | GGA1          |
| YMR026C                                          | PEX12         | YDR244W                 | PEX5          |
| YPR029C                                          | APL4          | YNR006W                 | VPS27         |
| YHR052W                                          | CIC1          | YKL068W                 | NUP100        |
| YKR020W                                          | VPS51         | YJL204C                 | RCY1          |
| YHR034C                                          | PIH1          | YCR060W                 | TAH1          |
| YOR127W                                          | RGA1          | YDR309C                 | GIC2          |
| YDR378C                                          | LSM6          | YNL199C                 | GCR2          |

| Predictions at threshold level 0.85 continued... |               |                         |               |
|--------------------------------------------------|---------------|-------------------------|---------------|
| Gene1 of predicted pair                          |               | Gene2 of predicted pair |               |
| Systematic Name                                  | Standard Name | Systematic Name         | Standard Name |
| YOR195W                                          | SLK19         | YGR270W                 | YTA7          |
| YGR268C                                          | HUA1          | YOR284W                 | HUA2          |
| YDL006W                                          | PTC1          | YER122C                 | GLO3          |
| YGL115W                                          | SNF4          | YDR358W                 | GGA1          |
| YOR367W                                          | SCP1          | YJL187C                 | SWE1          |
| YIR017C                                          | MET28         | YJR060W                 | CBF1          |
| YGR020C                                          | VMA7          | YJR033C                 | RAV1          |
| YPL120W                                          | VPS30         | YLR309C                 | IMH1          |
| YDL065C                                          | PEX19         | YMR204C                 | INP1          |
| YOR109W                                          | INP53         | YCL001W                 | RER1          |
| YKR084C                                          | HBS1          | YNL001W                 | DOM34         |
| YBL003C                                          | HTA2          | YBL002W                 | HTB2          |
| YDL056W                                          | MBP1          | YDR335W                 | MSN5          |
| YKL110C                                          | KTI12         | YPL152W                 | RRD2          |
| YNL243W                                          | SLA2          | YOR367W                 | SCP1          |
| YGL223C                                          | COG1          | YLR093C                 | NYV1          |
| YEL065W                                          | SIT1          | YAL024C                 | LTE1          |
| YHR161C                                          | YAP1801       | YCR088W                 | ABP1          |
| YGL066W                                          | SGF73         | YFR010W                 | UBP6          |
| YNL025C                                          | SSN8          | YGL025C                 | PGD1          |
| YOL043C                                          | NTG2          | YKL114C                 | APN1          |
| YDR245W                                          | MNN10         | YBR171W                 | SEC66         |
| YIL076W                                          | SEC28         | YLR350W                 | ORM2          |
| YMR016C                                          | SOK2          | YOR043W                 | WHI2          |
| YJR091C                                          | JSN1          | YLR370C                 | ARC18         |
| YML001W                                          | YPT7          | YDR310C                 | SUM1          |
| YDR192C                                          | NUP42         | YPR119W                 | CLB2          |
| YLR396C                                          | VPS33         | YGL124C                 | MON1          |
| YIL140W                                          | AXL2          | YGL054C                 | ERV14         |

| Predictions at threshold level 0.85 continued... |               |                         |               |
|--------------------------------------------------|---------------|-------------------------|---------------|
| Gene1 of predicted pair                          |               | Gene2 of predicted pair |               |
| Systematic Name                                  | Standard Name | Systematic Name         | Standard Name |
| YDR448W                                          | ADA2          | YBR009C                 | HHF1          |
| YNL031C                                          | HHT2          | YBR010W                 | HHT1          |
| YBL106C                                          | SRO77         | YLR423C                 | ATG17         |
| YGL153W                                          | PEX14         | YGR077C                 | PEX8          |
| YDR225W                                          | HTA1          | YDR335W                 | MSN5          |
| YHL019C                                          | APM2          | YKL135C                 | APL2          |
| YDR439W                                          | LRS4          | YOR141C                 | ARP8          |
| YER110C                                          | KAP123        | YBL079W                 | NUP170        |
| YJL053W                                          | PEP8          | YHR012W                 | VPS29         |
| YEL050C                                          | RML2          | YJL127C                 | SPT10         |
| YJR083C                                          | ACF4          | YDR507C                 | GIN4          |
| YCR020C-A                                        | MAK31         | YPL234C                 | TFP3          |
| YDR001C                                          | NTH1          | YPR119W                 | CLB2          |
| YMR223W                                          | UBP8          | YBR111W-A               | SUS1          |
| YDL223C                                          | HBT1          | YPR046W                 | MCM16         |
| YPR018W                                          | RLF2          | YGL175C                 | SAE2          |
| YML103C                                          | NUP188        | YGL016W                 | KAP122        |
| YML115C                                          | VAN1          | YML071C                 | COG8          |
| YNL027W                                          | CRZ1          | YJL164C                 | TPK1          |
| YJL036W                                          | SNX4          | YKR020W                 | VPS51         |
| YMR199W                                          | CLN1          | YDR207C                 | UME6          |
| YBR057C                                          | MUM2          | YPL018W                 | CTF19         |
| YHR178W                                          | STB5          | YBR114W                 | RAD16         |
| YGL025C                                          | PGD1          | YJL140W                 | RPB4          |
| YFR009W                                          | GCN20         | YJL189W                 | RPL39         |
| YOR033C                                          | EXO1          | YPL256C                 | CLN2          |
| YNL068C                                          | FKH2          | YDR507C                 | GIN4          |
| YLR452C                                          | SST2          | YER040W                 | GLN3          |
| YBR215W                                          | HPC2          | YOR038C                 | HIR2          |

| Predictions at threshold level 0.85 continued... |               |                         |               |
|--------------------------------------------------|---------------|-------------------------|---------------|
| Gene1 of predicted pair                          |               | Gene2 of predicted pair |               |
| Systematic Name                                  | Standard Name | Systematic Name         | Standard Name |
| YAL016W                                          | TPD3          | YPR040W                 | TIP41         |
| YHR134W                                          | WSS1          | YJR035W                 | RAD26         |
| YPL096C-A                                        | ERI1          | YEL044W                 | IES6          |
| YBR031W                                          | RPL4A         | YHR203C                 | RPS4B         |
| YLR234W                                          | TOP3          | YOL043C                 | NTG2          |
| YMR224C                                          | MRE11         | YKL139W                 | CTK1          |
| YPL129W                                          | TAF14         | YLR182W                 | SWI6          |
| YDR129C                                          | SAC6          | YKR001C                 | VPS1          |
| YBR260C                                          | RGD1          | YDR207C                 | UME6          |
| YDR225W                                          | HTA1          | YGL241W                 | KAP114        |
| YDR142C                                          | PEX7          | YDR265W                 | PEX10         |
| YGR081C                                          | SLX9          | YML095C                 | RAD10         |
| YHR016C                                          | YSC84         | YOR284W                 | HUA2          |
| YDR244W                                          | PEX5          | YGL153W                 | PEX14         |
| YLR181C                                          | VTA1          | YDR486C                 | VPS60         |
| YHR030C                                          | SLT2          | YER099C                 | PRS2          |
| YIL076W                                          | SEC28         | YNL238W                 | KEX2          |
| YDR265W                                          | PEX10         | YDL065C                 | PEX19         |
| YJL006C                                          | CTK2          | YLR254C                 | NDL1          |
| YHR171W                                          | ATG7          | YHR161C                 | YAP1801       |
| YPL129W                                          | TAF14         | YNL059C                 | ARP5          |
| YLR148W                                          | PEP3          | YPL045W                 | VPS16         |
| YLR093C                                          | NYV1          | YER122C                 | GLO3          |
| YLR148W                                          | PEP3          | YGL124C                 | MON1          |
| YLR292C                                          | SEC72         | YCL001W                 | RER1          |
| YDR265W                                          | PEX10         | YGR077C                 | PEX8          |
| YGR040W                                          | KSS1          | YBR083W                 | TEC1          |
| YPR018W                                          | RLF2          | YOR014W                 | RTS1          |
| YCL037C                                          | SRO9          | YNL238W                 | KEX2          |



| Predictions at threshold level 0.85 continued... |               |                         |               |
|--------------------------------------------------|---------------|-------------------------|---------------|
| Gene1 of predicted pair                          |               | Gene2 of predicted pair |               |
| Systematic Name                                  | Standard Name | Systematic Name         | Standard Name |
| YDR318W                                          | MCM21         | YGR188C                 | BUB1          |
| YKL139W                                          | CTK1          | YER161C                 | SPT2          |
| YFR024C-A                                        | LSB3          | YNL094W                 | APP1          |
| YGR283C                                          | YGR283C       | YMR310C                 | YMR310C       |
| YBL003C                                          | HTA2          | YGR275W                 | RTT102        |
| YLR234W                                          | TOP3          | YMR106C                 | YKU80         |
| YML062C                                          | MFT1          | YHR167W                 | THP2          |
| YHR079C                                          | IRE1          | YDR448W                 | ADA2          |
| YGL174W                                          | BUD13         | YDR363W-A               | SEM1          |
| YCL001W                                          | RER1          | YOR327C                 | SNC2          |
| YJR140C                                          | HIR3          | YBR215W                 | HPC2          |
| YPR049C                                          | ATG11         | YOL082W                 | ATG19         |
| YDR484W                                          | VPS52         | YHR161C                 | YAP1801       |
| YGL025C                                          | PGD1          | YGL003C                 | CDH1          |
| YGR252W                                          | GCN5          | YPL256C                 | CLN2          |
| YLR234W                                          | TOP3          | YER161C                 | SPT2          |
| YBR107C                                          | IML3          | YKL101W                 | HSL1          |
| YNL288W                                          | CAF40         | YJL183W                 | MNN11         |
| YDR004W                                          | RAD57         | YGL175C                 | SAE2          |
| YOR290C                                          | SNF2          | YLR176C                 | RFX1          |
| YDR244W                                          | PEX5          | YDL078C                 | MDH3          |
| YPL256C                                          | CLN2          | YGR152C                 | RSR1          |
| YMR025W                                          | CSI1          | YOL117W                 | RRI2          |
| YBR217W                                          | ATG12         | YKR035W-A               | DID2          |
| YLR234W                                          | TOP3          | YLR452C                 | SST2          |
| YNL145W                                          | MFA2          | YNL147W                 | LSM7          |
| YDR137W                                          | RGP1          | YNL199C                 | GCR2          |
| YGL134W                                          | PCL10         | YLR258W                 | GSY2          |
| YIL159W                                          | BNR1          | YBL025W                 | RRN10         |

| Predictions at threshold level 0.85 continued... |               |                         |               |
|--------------------------------------------------|---------------|-------------------------|---------------|
| Gene1 of predicted pair                          |               | Gene2 of predicted pair |               |
| Systematic Name                                  | Standard Name | Systematic Name         | Standard Name |
| YPL105C                                          | YPL105C       | YDR153C                 | ENT5          |
| YHR161C                                          | YAP1801       | YDR323C                 | PEP7          |
| YIL053W                                          | RHR2          | YML115C                 | VAN1          |
| YHL031C                                          | GOS1          | YCL001W                 | RER1          |
| YBR041W                                          | FAT1          | YMR313C                 | TGL3          |
| YPL022W                                          | RAD1          | YJR035W                 | RAD26         |
| YOR043W                                          | WHI2          | YCR077C                 | PAT1          |
| YBR215W                                          | HPC2          | YOR043W                 | WHI2          |
| YKL135C                                          | APL2          | YOR035C                 | SHE4          |
| YBR200W                                          | BEM1          | YKL048C                 | ELM1          |
| YNL307C                                          | MCK1          | YJR063W                 | RPA12         |
| YCR039C                                          | MATALPHA2     | YCR084C                 | TUP1          |
| YMR055C                                          | BUB2          | YGL003C                 | CDH1          |
| YCR020C-A                                        | MAK31         | YER122C                 | GLO3          |
| YMR008C                                          | PLB1          | YMR127C                 | SAS2          |
| YOR127W                                          | RGA1          | YDR310C                 | SUM1          |
| YKR001C                                          | VPS1          | YAR014C                 | BUD14         |
| YOR106W                                          | VAM3          | YLR093C                 | NYV1          |
| YNL297C                                          | MON2          | YPR032W                 | SRO7          |
| YKL139W                                          | CTK1          | YER040W                 | GLN3          |
| YNL297C                                          | MON2          | YCR066W                 | RAD18         |
| YPR167C                                          | MET16         | YLR043C                 | TRX1          |
| YJL124C                                          | LSM1          | YOR320C                 | GNT1          |
| YPL022W                                          | RAD1          | YGL175C                 | SAE2          |
| YPL213W                                          | LEA1          | YJR050W                 | ISY1          |
| YML115C                                          | VAN1          | YML001W                 | YPT7          |
| YDR378C                                          | LSM6          | YGR270W                 | YTA7          |
| YBR200W                                          | BEM1          | YGR135W                 | PRE9          |
| YHL031C                                          | GOS1          | YNL238W                 | KEX2          |

| Predictions at threshold level 0.85 continued... |               |                         |               |
|--------------------------------------------------|---------------|-------------------------|---------------|
| Gene1 of predicted pair                          |               | Gene2 of predicted pair |               |
| Systematic Name                                  | Standard Name | Systematic Name         | Standard Name |
| YOR212W                                          | STE4          | YFL026W                 | STE2          |
| YML115C                                          | VAN1          | YJL172W                 | CPS1          |
| YDR477W                                          | SNF1          | YGL124C                 | MON1          |
| YOR290C                                          | SNF2          | YHL025W                 | SNF6          |
| YKL101W                                          | HSL1          | YDR207C                 | UME6          |
| YFL026W                                          | STE2          | YPL187W                 | MF(ALPHA)1    |
| YJR125C                                          | ENT3          | YHR108W                 | GGA2          |
| YER110C                                          | KAP123        | YDR335W                 | MSN5          |
| YBR278W                                          | DPB3          | YOR368W                 | RAD17         |
| YBL103C                                          | RTG3          | YER162C                 | RAD4          |
| YHR111W                                          | UBA4          | YAR014C                 | BUD14         |
| YBR267W                                          | REI1          | YKR048C                 | NAP1          |
| YMR231W                                          | PEP5          | YDR323C                 | PEP7          |
| YOL061W                                          | PRS5          | YER099C                 | PRS2          |
| YJR060W                                          | CBF1          | YLR254C                 | NDL1          |
| YNL079C                                          | TPM1          | YOR035C                 | SHE4          |
| YDR329C                                          | PEX3          | YAL055W                 | PEX22         |
| YJL036W                                          | SNX4          | YPR032W                 | SRO7          |
| YLR043C                                          | TRX1          | YLR093C                 | NYV1          |
| YDL083C                                          | RPS16B        | YLR180W                 | SAM1          |
| YDR076W                                          | RAD55         | YJR090C                 | GRR1          |
| YBR200W                                          | BEM1          | YNL079C                 | TPM1          |
| YNL135C                                          | FPR1          | YOR208W                 | PTP2          |
| YKR020W                                          | VPS51         | YEL042W                 | GDA1          |
| YBR171W                                          | SEC66         | YOR327C                 | SNC2          |
| YHR084W                                          | STE12         | YMR164C                 | MSS11         |
| YNL021W                                          | HDA1          | YPR179C                 | HDA3          |
| YMR026C                                          | PEX12         | YJL172W                 | CPS1          |
| YOR132W                                          | VPS17         | YJL053W                 | PEP8          |

| Predictions at threshold level 0.85 continued... |               |                         |               |
|--------------------------------------------------|---------------|-------------------------|---------------|
| Gene1 of predicted pair                          |               | Gene2 of predicted pair |               |
| Systematic Name                                  | Standard Name | Systematic Name         | Standard Name |
| YKL139W                                          | CTK1          | YNL076W                 | MKS1          |
| YHR156C                                          | LIN1          | YLR386W                 | VAC14         |
| YDR440W                                          | DOT1          | YER122C                 | GLO3          |
| YIL132C                                          | CSM2          | YLR376C                 | PSY3          |
| YGL133W                                          | ITC1          | YOR304W                 | ISW2          |
| YMR095C                                          | SNO1          | YMR096W                 | SNZ1          |
| YMR179W                                          | SPT21         | YOL091W                 | SPO21         |
| YGL237C                                          | HAP2          | YJL183W                 | MNN11         |
| YML109W                                          | ZDS2          | YBR009C                 | HHF1          |
| YFR031C-A                                        | RPL2A         | YJL036W                 | SNX4          |
| YML115C                                          | VAN1          | YJL183W                 | MNN11         |
| YPR029C                                          | APL4          | YOR035C                 | SHE4          |
| YMR224C                                          | MRE11         | YDR335W                 | MSN5          |
| YOR138C                                          | RUP1          | YOR124C                 | UBP2          |
| YLR058C                                          | SHM2          | YBR215W                 | HPC2          |
| YLR079W                                          | SIC1          | YOR106W                 | VAM3          |
| YNR023W                                          | SNF12         | YBR289W                 | SNF5          |
| YOR033C                                          | EXO1          | YDL101C                 | DUN1          |
| YBR065C                                          | ECM2          | YIR009W                 | MSL1          |
| YIL076W                                          | SEC28         | YPL195W                 | APL5          |
| YBL016W                                          | FUS3          | YDL159W                 | STE7          |
| YML095C                                          | RAD10         | YGL253W                 | HXK2          |
| YBL047C                                          | EDE1          | YML097C                 | VPS9          |
| YHR134W                                          | WSS1          | YLR313C                 | SPH1          |
| YLR176C                                          | RFX1          | YCR084C                 | TUP1          |
| YGL133W                                          | ITC1          | YKL032C                 | IXR1          |
| YDR103W                                          | STE5          | YBR200W                 | BEM1          |
| YIL076W                                          | SEC28         | YNL051W                 | COG5          |
| YDR174W                                          | HMO1          | YDL013W                 | SLX5          |

| Predictions at threshold level 0.85 continued... |               |                         |               |
|--------------------------------------------------|---------------|-------------------------|---------------|
| Gene1 of predicted pair                          |               | Gene2 of predicted pair |               |
| Systematic Name                                  | Standard Name | Systematic Name         | Standard Name |
| YLR102C                                          | APC9          | YOR127W                 | RGA1          |
| YGR261C                                          | APL6          | YPL234C                 | TFP3          |
| YOR195W                                          | SLK19         | YDL155W                 | CLB3          |
| YNL215W                                          | IES2          | YEL013W                 | VAC8          |
| YIL159W                                          | BNR1          | YKR035W-A               | DID2          |
| YLR452C                                          | SST2          | YDL047W                 | SIT4          |
| YPL105C                                          | YPL105C       | YER120W                 | SCS2          |
| YJL172W                                          | CPS1          | YOR043W                 | WHI2          |
| YLR135W                                          | SLX4          | YJR035W                 | RAD26         |
| YOR212W                                          | STE4          | YJL157C                 | FAR1          |
| YLR386W                                          | VAC14         | YHR200W                 | RPN10         |
| YHR012W                                          | VPS29         | YGR105W                 | VMA21         |
| YEL053C                                          | MAK10         | YML001W                 | YPT7          |
| YKL110C                                          | KTI12         | YNL107W                 | YAF9          |
| YNL209W                                          | SSB2          | YDR028C                 | REG1          |
| YDR176W                                          | NGG1          | YDR216W                 | ADR1          |
| YAL024C                                          | LTE1          | YGR238C                 | KEL2          |
| YKL135C                                          | APL2          | YOR109W                 | INP53         |
| YDR171W                                          | HSP42         | YNL107W                 | YAF9          |
| YMR091C                                          | NPL6          | YCR020W-B               | HTL1          |
| YIL034C                                          | CAP2          | YGR080W                 | TWF1          |
| YDL116W                                          | NUP84         | YJR024C                 | MDE1          |
| YER129W                                          | SAK1          | YJL187C                 | SWE1          |
| YGL163C                                          | RAD54         | YLR032W                 | RAD5          |
| YNL201C                                          | PSY2          | YLR182W                 | SWI6          |
| YGL174W                                          | BUD13         | YJR135C                 | MCM22         |
| YGL134W                                          | PCL10         | YPL031C                 | PHO85         |
| YNL264C                                          | PDR17         | YBL078C                 | ATG8          |
| YNL106C                                          | INP52         | YKR061W                 | KTR2          |

| Predictions at threshold level 0.85 continued... |               |                         |               |
|--------------------------------------------------|---------------|-------------------------|---------------|
| Gene1 of predicted pair                          |               | Gene2 of predicted pair |               |
| Systematic Name                                  | Standard Name | Systematic Name         | Standard Name |
| YOR023C                                          | AHC1          | YGR270W                 | YTA7          |
| YDR176W                                          | NGG1          | YGL025C                 | PGD1          |
| YPR018W                                          | RLF2          | YNL206C                 | RTT106        |
| YDR176W                                          | NGG1          | YPR072W                 | NOT5          |
| YDR156W                                          | RPA14         | YBR041W                 | FAT1          |
| YDR137W                                          | RGP1          | YLR320W                 | MMS22         |
| YER110C                                          | KAP123        | YNL030W                 | HHF2          |
| YNL230C                                          | ELA1          | YOR028C                 | CIN5          |
| YLR119W                                          | SRN2          | YPR173C                 | VPS4          |
| YPL115C                                          | BEM3          | YML109W                 | ZDS2          |
| YML016C                                          | PPZ1          | YLR452C                 | SST2          |
| YER114C                                          | BOI2          | YLR362W                 | STE11         |
| YER143W                                          | DDI1          | YAL030W                 | SNC1          |
| YNL307C                                          | MCK1          | YDR076W                 | RAD55         |
| YDL185W                                          | TFP1          | YHR039C-A               | VMA10         |
| YGR072W                                          | UPF3          | YKR020W                 | VPS51         |
| YLR079W                                          | SIC1          | YNL236W                 | SIN4          |
| YLR447C                                          | VMA6          | YDL185W                 | TFP1          |
| YLR399C                                          | BDF1          | YNL030W                 | HHF2          |
| YJL095W                                          | BCK1          | YHL002W                 | HSE1          |
| YDR363W-A                                        | SEM1          | YGR135W                 | PRE9          |
| YBR009C                                          | HHF1          | YDR227W                 | SIR4          |
| YPL042C                                          | SSN3          | YGL025C                 | PGD1          |
| YGL054C                                          | ERV14         | YNL238W                 | KEX2          |
| YMR026C                                          | PEX12         | YGL153W                 | PEX14         |
| YDR137W                                          | RGP1          | YKR020W                 | VPS51         |
| YGR270W                                          | YTA7          | YBR114W                 | RAD16         |
| YER059W                                          | PCL6          | YIL050W                 | PCL7          |
| YJL151C                                          | SNA3          | YHR016C                 | YSC84         |

| Predictions at threshold level 0.85 continued... |               |                         |               |
|--------------------------------------------------|---------------|-------------------------|---------------|
| Gene1 of predicted pair                          |               | Gene2 of predicted pair |               |
| Systematic Name                                  | Standard Name | Systematic Name         | Standard Name |
| YEL043W                                          | YEL043W       | YGR089W                 | NNF2          |
| YBR289W                                          | SNF5          | YOR064C                 | YNG1          |
| YGR261C                                          | APL6          | YOR109W                 | INP53         |
| YLR362W                                          | STE11         | YBL016W                 | FUS3          |
| YJL210W                                          | PEX2          | YOL044W                 | PEX15         |
| YER118C                                          | SHO1          | YHL002W                 | HSE1          |
| YDR329C                                          | PEX3          | YOL044W                 | PEX15         |
| YJR060W                                          | CBF1          | YPL018W                 | CTF19         |
| YGL237C                                          | HAP2          | YEL056W                 | HAT2          |
| YDR329C                                          | PEX3          | YDR244W                 | PEX5          |
| YIL148W                                          | RPL40A        | YMR164C                 | MSS11         |
| YMR216C                                          | SKY1          | YOL018C                 | TLG2          |
| YJL029C                                          | VPS53         | YKR020W                 | VPS51         |
| YGR004W                                          | PEX31         | YDR479C                 | PEX29         |
| YOL061W                                          | PRS5          | YBL068W                 | PRS4          |
| YHR060W                                          | VMA22         | YOR035C                 | SHE4          |
| YJL124C                                          | LSM1          | YKR026C                 | GCN3          |
| YBR030W                                          | YBR030W       | YGL212W                 | VAM7          |
| YDR080W                                          | VPS41         | YNL041C                 | COG6          |
| YPL256C                                          | CLN2          | YHR108W                 | GGA2          |
| YDL160C                                          | DHH1          | YDR422C                 | SIP1          |
| YDR057W                                          | YOS9          | YDR144C                 | MKC7          |
| YLR135W                                          | SLX4          | YBR082C                 | UBC4          |
| YNL206C                                          | RTT106        | YNL030W                 | HHF2          |
| YLR109W                                          | AHP1          | YLR043C                 | TRX1          |
| YPL045W                                          | VPS16         | YDL077C                 | VAM6          |
| YDR004W                                          | RAD57         | YGL163C                 | RAD54         |
| YDR383C                                          | NKP1          | YLR315W                 | NKP2          |
| YML100W                                          | TSL1          | YFL033C                 | RIM15         |

| Predictions at threshold level 0.85 continued... |               |                         |               |
|--------------------------------------------------|---------------|-------------------------|---------------|
| Gene1 of predicted pair                          |               | Gene2 of predicted pair |               |
| Systematic Name                                  | Standard Name | Systematic Name         | Standard Name |
| YMR095C                                          | SNO1          | YNL238W                 | KEX2          |
| YDL020C                                          | RPN4          | YOR127W                 | RGA1          |
| YLR288C                                          | MEC3          | YHR178W                 | STB5          |
| YJL172W                                          | CPS1          | YNL307C                 | MCK1          |
| YLR083C                                          | EMP70         | YOR069W                 | VPS5          |
| YAL016W                                          | TPD3          | YGL190C                 | CDC55         |
| YOL145C                                          | CTR9          | YHR200W                 | RPN10         |
| YLR096W                                          | KIN2          | YPR032W                 | SRO7          |
| YLR079W                                          | SIC1          | YDR146C                 | SWI5          |
| YJL172W                                          | CPS1          | YOR035C                 | SHE4          |
| YDR477W                                          | SNF1          | YER027C                 | GAL83         |
| YIL076W                                          | SEC28         | YJL172W                 | CPS1          |
| YER044C                                          | ERG28         | YPL195W                 | APL5          |
| YLR315W                                          | NKP2          | YJR135C                 | MCM22         |
| YBL047C                                          | EDE1          | YJR035W                 | RAD26         |
| YPR119W                                          | CLB2          | YNL197C                 | WHI3          |
| YGL033W                                          | HOP2          | YNL032W                 | SIW14         |
| YLR288C                                          | MEC3          | YDL059C                 | RAD59         |
| YNL051W                                          | COG5          | YER122C                 | GLO3          |
| YDR129C                                          | SAC6          | YBR200W                 | BEM1          |
| YMR179W                                          | SPT21         | YPR046W                 | MCM16         |
| YBL103C                                          | RTG3          | YDR137W                 | RGP1          |
| YCR002C                                          | CDC10         | YJL187C                 | SWE1          |
| YDR176W                                          | NGG1          | YBR010W                 | HHT1          |
| YPL105C                                          | YPL105C       | YKL074C                 | MUD2          |
| YGL025C                                          | PGD1          | YBR010W                 | HHT1          |
| YBR108W                                          | YBR108W       | YLR144C                 | ACF2          |
| YMR199W                                          | CLN1          | YMR125W                 | STO1          |
| YDR477W                                          | SNF1          | YGL035C                 | MIG1          |



| Predictions at threshold level 0.85 continued... |               |                         |               |
|--------------------------------------------------|---------------|-------------------------|---------------|
| Gene1 of predicted pair                          |               | Gene2 of predicted pair |               |
| Systematic Name                                  | Standard Name | Systematic Name         | Standard Name |
| YOR106W                                          | VAM3          | YDR080W                 | VPS41         |
| YGR261C                                          | APL6          | YML071C                 | COG8          |
| YCL010C                                          | SGF29         | YOL148C                 | SPT20         |
| YGL033W                                          | HOP2          | YBR280C                 | SAF1          |
| YDR318W                                          | MCM21         | YPL018W                 | CTF19         |
| YOR001W                                          | RRP6          | YEL013W                 | VAC8          |
| YDR335W                                          | MSN5          | YPR120C                 | CLB5          |
| YDR156W                                          | RPA14         | YNL248C                 | RPA49         |
| YDR174W                                          | HMO1          | YHR134W                 | WSS1          |
| YLR234W                                          | TOP3          | YOR368W                 | RAD17         |
| YHR119W                                          | SET1          | YPL138C                 | SPP1          |
| YCL037C                                          | SRO9          | YNL199C                 | GCR2          |
| YKR020W                                          | VPS51         | YGL095C                 | VPS45         |
| YKL139W                                          | CTK1          | YJR063W                 | RPA12         |
| YML001W                                          | YPT7          | YLR398C                 | SKI2          |
| YGL223C                                          | COG1          | YKR014C                 | YPT52         |
| YBR112C                                          | CYC8          | YDL005C                 | MED2          |
| YML071C                                          | COG8          | YER122C                 | GLO3          |
| YPR036W                                          | VMA13         | YGR020C                 | VMA7          |
| YKR001C                                          | VPS1          | YMR022W                 | UBC7          |
| YMR179W                                          | SPT21         | YDR318W                 | MCM21         |
| YDR378C                                          | LSM6          | YNL145W                 | MFA2          |
| YDR382W                                          | RPP2B         | YJL124C                 | LSM1          |
| YMR153W                                          | NUP53         | YER110C                 | KAP123        |
| YHR156C                                          | LIN1          | YNL238W                 | KEX2          |
| YBR200W                                          | BEM1          | YGR152C                 | RSR1          |
| YNL243W                                          | SLA2          | YHR016C                 | YSC84         |
| YOR304W                                          | ISW2          | YDR207C                 | UME6          |
| YNL291C                                          | MID1          | YPL120W                 | VPS30         |

| Predictions at threshold level 0.85 continued... |               |                         |               |
|--------------------------------------------------|---------------|-------------------------|---------------|
| Gene1 of predicted pair                          |               | Gene2 of predicted pair |               |
| Systematic Name                                  | Standard Name | Systematic Name         | Standard Name |
| YDR378C                                          | LSM6          | YGL163C                 | RAD54         |
| YDL077C                                          | VAM6          | YNL147W                 | LSM7          |
| YMR198W                                          | CIK1          | YPL253C                 | VIK1          |
| YCL037C                                          | SRO9          | YJR033C                 | RAV1          |
| YFR010W                                          | UBP6          | YHR200W                 | RPN10         |
| YDL239C                                          | ADY3          | YOL091W                 | SPO21         |
| YOL091W                                          | SPO21         | YOR177C                 | MPC54         |
| YMR092C                                          | AIP1          | YGR080W                 | TWF1          |
| YHR160C                                          | PEX18         | YDR142C                 | PEX7          |
| YHR060W                                          | VMA22         | YPL195W                 | APL5          |
| YBR171W                                          | SEC66         | YNL238W                 | KEX2          |
| YPR036W                                          | VMA13         | YGR188C                 | BUB1          |
| YML001W                                          | YPT7          | YJL183W                 | MNN11         |
| YCR086W                                          | CSM1          | YDR310C                 | SUM1          |
| YNL199C                                          | GCR2          | YMR311C                 | GLC8          |
| YDR448W                                          | ADA2          | YPL129W                 | TAF14         |
| YGL158W                                          | RCK1          | YDR423C                 | CAD1          |
| YDR283C                                          | GCN2          | YFR009W                 | GCN20         |
| YPL145C                                          | KES1          | YKL188C                 | PXA2          |
| YHR178W                                          | STB5          | YHR111W                 | UBA4          |
| YGL200C                                          | EMP24         | YML067C                 | ERV41         |
| YDR490C                                          | PKH1          | YGR086C                 | PIL1          |
| YPL164C                                          | MLH3          | YMR167W                 | MLH1          |
| YMR198W                                          | CIK1          | YJR005W                 | APL1          |
| YEL009C                                          | GCN4          | YJL176C                 | SWI3          |
| YOR212W                                          | STE4          | YDR264C                 | AKR1          |
| YDR004W                                          | RAD57         | YJR135C                 | MCM22         |
| YGR133W                                          | PEX4          | YAL002W                 | VPS8          |
| YOR127W                                          | RGA1          | YKR020W                 | VPS51         |

| Predictions at threshold level 0.85 continued... |               |                         |               |
|--------------------------------------------------|---------------|-------------------------|---------------|
| Gene1 of predicted pair                          |               | Gene2 of predicted pair |               |
| Systematic Name                                  | Standard Name | Systematic Name         | Standard Name |
| YPR102C                                          | RPL11A        | YOR078W                 | BUD21         |
| YKR020W                                          | VPS51         | YNR032W                 | PPG1          |
| YHR149C                                          | SKG6          | YMR273C                 | ZDS1          |
| YGR041W                                          | BUD9          | YOR301W                 | RAX1          |
| YGR142W                                          | BTN2          | YBR264C                 | YPT10         |
| YIR005W                                          | IST3          | YOR141C                 | ARP8          |
| YGL174W                                          | BUD13         | YOR308C                 | SNU66         |
| YBR217W                                          | ATG12         | YPL057C                 | SUR1          |
| YOR035C                                          | SHE4          | YDR323C                 | PEP7          |
| YEL043W                                          | YEL043W       | YOL018C                 | TLG2          |
| YKL139W                                          | CTK1          | YKL160W                 | ELF1          |
| YGL033W                                          | HOP2          | YKL126W                 | YPK1          |
| YCL001W                                          | RER1          | YFL033C                 | RIM15         |
| YBR009C                                          | HHF1          | YNL030W                 | HHF2          |
| YJL053W                                          | PEP8          | YCL001W                 | RER1          |
| YBL078C                                          | ATG8          | YOR106W                 | VAM3          |
| YJL151C                                          | SNA3          | YOR284W                 | HUA2          |
| YDL101C                                          | DUN1          | YLR135W                 | SLX4          |
| YOR033C                                          | EXO1          | YDR097C                 | MSH6          |
| YBR057C                                          | MUM2          | YDR254W                 | CHL4          |
| YJR099W                                          | YUH1          | YHR108W                 | GGA2          |
| YDR293C                                          | SSD1          | YER122C                 | GLO3          |
| YHR060W                                          | VMA22         | YKL119C                 | VPH2          |
| YNL215W                                          | IES2          | YIL076W                 | SEC28         |
| YLR079W                                          | SIC1          | YLR399C                 | BDF1          |
| YNR052C                                          | POP2          | YLR399C                 | BDF1          |
| YPR040W                                          | TIP41         | YGL190C                 | CDC55         |
| YML095C                                          | RAD10         | YBL019W                 | APN2          |
| YOR132W                                          | VPS17         | YCL001W                 | RER1          |

| Predictions at threshold level 0.85 continued... |               |                         |               |
|--------------------------------------------------|---------------|-------------------------|---------------|
| Gene1 of predicted pair                          |               | Gene2 of predicted pair |               |
| Systematic Name                                  | Standard Name | Systematic Name         | Standard Name |
| YKL048C                                          | ELM1          | YKL101W                 | HSL1          |
| YKR020W                                          | VPS51         | YLR309C                 | IMH1          |
| YMR142C                                          | RPL13B        | YBR108W                 | YBR108W       |
| YJL124C                                          | LSM1          | YDL047W                 | SIT4          |
| YLR435W                                          | TSR2          | YGL189C                 | RPS26A        |
| YJR090C                                          | GRR1          | YLR352W                 | YLR352W       |
| YLR362W                                          | STE11         | YPR119W                 | CLB2          |
| YNL291C                                          | MID1          | YGR217W                 | CCH1          |
| YGR129W                                          | SYF2          | YIR009W                 | MSL1          |
| YGR020C                                          | VMA7          | YHR060W                 | VMA22         |
| YNL291C                                          | MID1          | YDR318W                 | MCM21         |
| YDR179C                                          | CSN9          | YMR025W                 | CSI1          |
| YKL160W                                          | ELF1          | YLR350W                 | ORM2          |
| YGL100W                                          | SEH1          | YKL057C                 | NUP120        |
| YKL139W                                          | CTK1          | YBL025W                 | RRN10         |
| YDR004W                                          | RAD57         | YLR032W                 | RAD5          |
| YKL048C                                          | ELM1          | YDR309C                 | GIC2          |
| YGL223C                                          | COG1          | YOR036W                 | PEP12         |
| YDR101C                                          | ARX1          | YBR031W                 | RPL4A         |
| YDR216W                                          | ADR1          | YMR280C                 | CAT8          |
| YBR020W                                          | GAL1          | YML051W                 | GAL80         |
| YGR200C                                          | ELP2          | YHR187W                 | IKI1          |
| YOR109W                                          | INP53         | YHL020C                 | OPI1          |
| YGR261C                                          | APL6          | YOR106W                 | VAM3          |
| YGR072W                                          | UPF3          | YKR030W                 | GMH1          |
| YGL223C                                          | COG1          | YGL054C                 | ERV14         |
| YPL256C                                          | CLN2          | YOR014W                 | RTS1          |
| YDR309C                                          | GIC2          | YJL187C                 | SWE1          |
| YPR018W                                          | RLF2          | YGR184C                 | UBR1          |

| Predictions at threshold level 0.85 continued... |               |                         |               |
|--------------------------------------------------|---------------|-------------------------|---------------|
| Gene1 of predicted pair                          |               | Gene2 of predicted pair |               |
| Systematic Name                                  | Standard Name | Systematic Name         | Standard Name |
| YMR153W                                          | NUP53         | YML057W                 | CMP2          |
| YFR031C-A                                        | RPL2A         | YJL095W                 | BCK1          |
| YBR173C                                          | UMP1          | YHR056C                 | RSC30         |
| YCL001W                                          | RER1          | YNL051W                 | COG5          |
| YJL029C                                          | VPS53         | YOR327C                 | SNC2          |
| YJR040W                                          | GEF1          | YML071C                 | COG8          |
| YDR146C                                          | SWI5          | YMR199W                 | CLN1          |
| YDR379W                                          | RGA2          | YKL048C                 | ELM1          |
| YOR127W                                          | RGA1          | YGR152C                 | RSR1          |
| YLR135W                                          | SLX4          | YOL030W                 | GAS5          |
| YBR200W                                          | BEM1          | YLR362W                 | STE11         |
| YNL238W                                          | KEX2          | YAR014C                 | BUD14         |
| YHL020C                                          | OPI1          | YOL108C                 | INO4          |
| YDR443C                                          | SSN2          | YDL005C                 | MED2          |
| YPL129W                                          | TAF14         | YOR141C                 | ARP8          |
| YAL024C                                          | LTE1          | YJL187C                 | SWE1          |
| YDR176W                                          | NGG1          | YPL129W                 | TAF14         |
| YMR071C                                          | TVP18         | YAR014C                 | BUD14         |
| YGR105W                                          | VMA21         | YNL051W                 | COG5          |
| YDL106C                                          | PHO2          | YFR034C                 | PHO4          |
| YBR127C                                          | VMA2          | YDL185W                 | TFP1          |
| YCR002C                                          | CDC10         | YHR061C                 | GIC1          |
| YNL199C                                          | GCR2          | YJL095W                 | BCK1          |
| YKR099W                                          | BAS1          | YNL307C                 | MCK1          |
| YLR386W                                          | VAC14         | YBR114W                 | RAD16         |
| YBL003C                                          | HTA2          | YNL030W                 | HHF2          |
| YNL238W                                          | KEX2          | YDR358W                 | GGA1          |
| YJL151C                                          | SNA3          | YKR030W                 | GMH1          |
| YGL212W                                          | VAM7          | YML071C                 | COG8          |

| Predictions at threshold level 0.85 continued... |               |                         |               |
|--------------------------------------------------|---------------|-------------------------|---------------|
| Gene1 of predicted pair                          |               | Gene2 of predicted pair |               |
| Systematic Name                                  | Standard Name | Systematic Name         | Standard Name |
| YGR004W                                          | PEX31         | YMR204C                 | INP1          |
| YPL050C                                          | MNN9          | YKR020W                 | VPS51         |
| YLR453C                                          | RIF2          | YBR275C                 | RIF1          |
| YDR225W                                          | HTA1          | YDL013W                 | SLX5          |
| YLR090W                                          | XDJ1          | YGL033W                 | HOP2          |
| YHR079C                                          | IRE1          | YPL248C                 | GAL4          |
| YEL050C                                          | RML2          | YMR179W                 | SPT21         |
| YBR009C                                          | HHF1          | YPR119W                 | CLB2          |
| YNL243W                                          | SLA2          | YEL003W                 | GIM4          |
| YLL039C                                          | UBI4          | YPL256C                 | CLN2          |
| YDR137W                                          | RGP1          | YDR261C                 | EXG2          |
| YOR332W                                          | VMA4          | YBR127C                 | VMA2          |
| YOL126C                                          | MDH2          | YNR065C                 | YNR065C       |
| YGL054C                                          | ERV14         | YJL004C                 | SYS1          |
| YPR029C                                          | APL4          | YOR109W                 | INP53         |
| YKL007W                                          | CAP1          | YBR171W                 | SEC66         |
| YDL101C                                          | DUN1          | YLR234W                 | TOP3          |
| YPL129W                                          | TAF14         | YFR034C                 | PHO4          |
| YGR020C                                          | VMA7          | YKL080W                 | VMA5          |
| YER044C                                          | ERG28         | YHR039C-A               | VMA10         |
| YLR386W                                          | VAC14         | YOR275C                 | RIM20         |
| YGR184C                                          | UBR1          | YHR200W                 | RPN10         |
| YKR035W-A                                        | DID2          | YPR173C                 | VPS4          |
| YGR072W                                          | UPF3          | YAL002W                 | VPS8          |
| YGL115W                                          | SNF4          | YER040W                 | GLN3          |
| YMR192W                                          | GYL1          | YHR016C                 | YSC84         |
| YLR119W                                          | SRN2          | YDR358W                 | GGA1          |
| YKL010C                                          | UFD4          | YJL183W                 | MNN11         |
| YHR200W                                          | RPN10         | YPR119W                 | CLB2          |

| Predictions at threshold level 0.85 continued... |               |                         |               |
|--------------------------------------------------|---------------|-------------------------|---------------|
| Gene1 of predicted pair                          |               | Gene2 of predicted pair |               |
| Systematic Name                                  | Standard Name | Systematic Name         | Standard Name |
| YOR127W                                          | RGA1          | YHR061C                 | GIC1          |
| YBL078C                                          | ATG8          | YGL223C                 | COG1          |
| YMR199W                                          | CLN1          | YOR368W                 | RAD17         |
| YIL076W                                          | SEC28         | YER044C                 | ERG28         |
| YKR020W                                          | VPS51         | YJL187C                 | SWE1          |
| YDR448W                                          | ADA2          | YLR182W                 | SWI6          |
| YMR198W                                          | CIK1          | YPR120C                 | CLB5          |
| YLR447C                                          | VMA6          | YHR039C-A               | VMA10         |
| YFR010W                                          | UBP6          | YJR135C                 | MCM22         |
| YPL161C                                          | BEM4          | YNL293W                 | MSB3          |
| YJL124C                                          | LSM1          | YAR014C                 | BUD14         |
| YPL024W                                          | RMI1          | YHR060W                 | VMA22         |
| YML016C                                          | PPZ1          | YDL226C                 | GCS1          |
| YNL166C                                          | BNI5          | YPL161C                 | BEM4          |
| YBR264C                                          | YPT10         | YGL198W                 | YIP4          |
| YPR046W                                          | MCM16         | YBR280C                 | SAF1          |
| YGR241C                                          | YAP1802       | YGL095C                 | VPS45         |
| YKR001C                                          | VPS1          | YHR012W                 | VPS29         |
| YLR433C                                          | CNA1          | YPR101W                 | SNT309        |
| YNL309W                                          | STB1          | YPL256C                 | CLN2          |
| YCR020W-B                                        | HTL1          | YLR357W                 | RSC2          |
| YPL050C                                          | MNN9          | YKR014C                 | YPT52         |
| YMR198W                                          | CIK1          | YBR215W                 | HPC2          |
| YBL008W                                          | HIR1          | YDR448W                 | ADA2          |
| YPL178W                                          | CBC2          | YKL117W                 | SBA1          |
| YLR119W                                          | SRN2          | YKL041W                 | VPS24         |
| YKL213C                                          | DOA1          | YMR067C                 | UBX4          |
| YKL025C                                          | PAN3          | YHR111W                 | UBA4          |
| YJL154C                                          | VPS35         | YHR060W                 | VMA22         |

| Predictions at threshold level 0.85 continued... |               |                         |               |
|--------------------------------------------------|---------------|-------------------------|---------------|
| Gene1 of predicted pair                          |               | Gene2 of predicted pair |               |
| Systematic Name                                  | Standard Name | Systematic Name         | Standard Name |
| YAL051W                                          | OAF1          | YKL032C                 | IXR1          |
| YHR098C                                          | SFB3          | YDR485C                 | VPS72         |
| YER118C                                          | SHO1          | YPR119W                 | CLB2          |
| YGR261C                                          | APL6          | YDR320C                 | SWA2          |
| YGL212W                                          | VAM7          | YPL057C                 | SUR1          |
| YDR179C                                          | CSN9          | YJR084W                 | CSN12         |
| YOR078W                                          | BUD21         | YER102W                 | RPS8B         |
| YBR108W                                          | YBR108W       | YDR310C                 | SUM1          |
| YHR200W                                          | RPN10         | YPL248C                 | GAL4          |
| YGL033W                                          | HOP2          | YEL060C                 | PRB1          |
| YEL043W                                          | YEL043W       | YPR032W                 | SRO7          |
| YER089C                                          | PTC2          | YDL006W                 | PTC1          |
| YLR079W                                          | SIC1          | YNL079C                 | TPM1          |
| YDL059C                                          | RAD59         | YDR076W                 | RAD55         |
| YNL243W                                          | SLA2          | YLR170C                 | APS1          |
| YEL009C                                          | GCN4          | YPL248C                 | GAL4          |
| YDR244W                                          | PEX5          | YGL205W                 | POX1          |
| YNL166C                                          | BNI5          | YDR183W                 | PLP1          |
| YDR097C                                          | MSH6          | YMR167W                 | MLH1          |
| YPR036W                                          | VMA13         | YBR280C                 | SAF1          |
| YOR290C                                          | SNF2          | YDR073W                 | SNF11         |
| YNL243W                                          | SLA2          | YOR284W                 | HUA2          |
| YEL013W                                          | VAC8          | YNL107W                 | YAF9          |
| YDR358W                                          | GGA1          | YOR327C                 | SNC2          |
| YOL145C                                          | CTR9          | YLR357W                 | RSC2          |
| YER001W                                          | MNN1          | YDR245W                 | MNN10         |
| YJR060W                                          | CBF1          | YKL114C                 | APN1          |
| YDR254W                                          | CHL4          | YFR036W                 | CDC26         |
| YHL025W                                          | SNF6          | YKL109W                 | HAP4          |



| Predictions at threshold level 0.85 continued... |               |                         |               |
|--------------------------------------------------|---------------|-------------------------|---------------|
| Gene1 of predicted pair                          |               | Gene2 of predicted pair |               |
| Systematic Name                                  | Standard Name | Systematic Name         | Standard Name |
| YBL088C                                          | TEL1          | YPL022W                 | RAD1          |
| YGL033W                                          | HOP2          | YLR320W                 | MMS22         |
| YGL175C                                          | SAE2          | YGL031C                 | RPL24A        |
| YIL034C                                          | CAP2          | YOR035C                 | SHE4          |
| YHR134W                                          | WSS1          | YBR073W                 | RDH54         |
| YIL159W                                          | BNR1          | YDR477W                 | SNF1          |
| YGR261C                                          | APL6          | YIL076W                 | SEC28         |
| YHR134W                                          | WSS1          | YBR082C                 | UBC4          |
| YDR101C                                          | ARX1          | YKL009W                 | MRT4          |
| YOR080W                                          | DIA2          | YKL213C                 | DOA1          |
| YBR200W                                          | BEM1          | YGL124C                 | MON1          |
| YEL009C                                          | GCN4          | YGR252W                 | GCN5          |
| YOR112W                                          | CEX1          | YOR069W                 | VPS5          |
| YNL094W                                          | APP1          | YBR133C                 | HSL7          |
| YNR052C                                          | POP2          | YPL203W                 | TPK2          |
| YLR292C                                          | SEC72         | YJL183W                 | MNN11         |
| YGR268C                                          | HUA1          | YPL246C                 | RBD2          |
| YMR116C                                          | ASC1          | YNL329C                 | PEX6          |
| YJL140W                                          | RPB4          | YLR357W                 | RSC2          |
| YPR120C                                          | CLB5          | YPL256C                 | CLN2          |
| YLL007C                                          | YLL007C       | YBR107C                 | IML3          |
| YOR195W                                          | SLK19         | YKL048C                 | ELM1          |
| YOR191W                                          | RIS1          | YPL024W                 | RMI1          |
| YML001W                                          | YPT7          | YKR014C                 | YPT52         |
| YDR129C                                          | SAC6          | YBR260C                 | RGD1          |
| YPL032C                                          | SVL3          | YLR429W                 | CRN1          |
| YIL036W                                          | CST6          | YER118C                 | SHO1          |
| YPL042C                                          | SSN3          | YDR378C                 | LSM6          |
| YEL022W                                          | GEA2          | YKR030W                 | GMH1          |

| Predictions at threshold level 0.85 continued... |               |                         |               |
|--------------------------------------------------|---------------|-------------------------|---------------|
| Gene1 of predicted pair                          |               | Gene2 of predicted pair |               |
| Systematic Name                                  | Standard Name | Systematic Name         | Standard Name |
| YBR200W                                          | BEM1          | YJR032W                 | CPR7          |
| YDR146C                                          | SWI5          | YPL248C                 | GAL4          |
| YDR176W                                          | NGG1          | YDL005C                 | MED2          |
| YDR004W                                          | RAD57         | YLR394W                 | CST9          |
| YOR375C                                          | GDH1          | YKL041W                 | VPS24         |
| YDR484W                                          | VPS52         | YLR396C                 | VPS33         |
| YER161C                                          | SPT2          | YEL013W                 | VAC8          |
| YHR171W                                          | ATG7          | YMR159C                 | ATG16         |
| YNL238W                                          | KEX2          | YOL018C                 | TLG2          |
| YKL213C                                          | DOA1          | YJL048C                 | UBX6          |
| YNL238W                                          | KEX2          | YAL002W                 | VPS8          |
| YBR200W                                          | BEM1          | YOR023C                 | AHC1          |
| YDR176W                                          | NGG1          | YBR111W-A               | SUS1          |
| YDL065C                                          | PEX19         | YNL214W                 | PEX17         |
| YDR179C                                          | CSN9          | YDL216C                 | RRI1          |
| YNL044W                                          | YIP3          | YKR014C                 | YPT52         |
| YGR261C                                          | APL6          | YDR080W                 | VPS41         |
| YGL133W                                          | ITC1          | YLR386W                 | VAC14         |
| YDR358W                                          | GGA1          | YPL259C                 | APM1          |
| YDR395W                                          | SXM1          | YBR017C                 | KAP104        |
| YGR241C                                          | YAP1802       | YHR108W                 | GGA2          |
| YBL021C                                          | HAP3          | YEL056W                 | HAT2          |
| YMR153W                                          | NUP53         | YPR046W                 | MCM16         |
| YLR313C                                          | SPH1          | YDL159W                 | STE7          |
| YML115C                                          | VAN1          | YPL050C                 | MNN9          |
| YLR381W                                          | CTF3          | YHR200W                 | RPN10         |
| YHR178W                                          | STB5          | YBR171W                 | SEC66         |
| YLR386W                                          | VAC14         | YLR398C                 | SKI2          |
| YNL021W                                          | HDA1          | YCR084C                 | TUP1          |

| Predictions at threshold level 0.85 continued... |               |                         |               |
|--------------------------------------------------|---------------|-------------------------|---------------|
| Gene1 of predicted pair                          |               | Gene2 of predicted pair |               |
| Systematic Name                                  | Standard Name | Systematic Name         | Standard Name |
| YBR041W                                          | FAT1          | YKL094W                 | YJU3          |
| YGL212W                                          | VAM7          | YNR072W                 | HXT17         |
| YER001W                                          | MNN1          | YKR020W                 | VPS51         |
| YBL008W                                          | HIR1          | YBR289W                 | SNF5          |
| YLR079W                                          | SIC1          | YPL106C                 | SSE1          |
| YPL152W                                          | RRD2          | YDL047W                 | SIT4          |
| YJR032W                                          | CPR7          | YMR167W                 | MLH1          |
| YBL008W                                          | HIR1          | YLR399C                 | BDF1          |
| YDR129C                                          | SAC6          | YNL079C                 | TPM1          |
| YKL110C                                          | KTI12         | YDL047W                 | SIT4          |
| YMR142C                                          | RPL13B        | YDL083C                 | RPS16B        |
| YGL033W                                          | HOP2          | YGL183C                 | MND1          |
| YAL024C                                          | LTE1          | YBR200W                 | BEM1          |
| YFR010W                                          | UBP6          | YHL030W                 | ECM29         |
| YPL129W                                          | TAF14         | YOL051W                 | GAL11         |
| YBR017C                                          | KAP104        | YKR082W                 | NUP133        |
| YNL288W                                          | CAF40         | YMR055C                 | BUB2          |
| YJL036W                                          | SNX4          | YER120W                 | SCS2          |
| YER116C                                          | SLX8          | YML095C                 | RAD10         |
| YBR270C                                          | BIT2          | YNL047C                 | SLM2          |
| YPL178W                                          | CBC2          | YGL016W                 | KAP122        |
| YPL018W                                          | CTF19         | YKL101W                 | HSL1          |
| YBR182C                                          | SMP1          | YPL089C                 | RLM1          |
| YER114C                                          | BOI2          | YGR152C                 | RSR1          |
| YLR360W                                          | VPS38         | YBR128C                 | ATG14         |
| YDR448W                                          | ADA2          | YOR023C                 | AHC1          |
| YPR018W                                          | RLF2          | YBR009C                 | HHF1          |
| YPL129W                                          | TAF14         | YBR010W                 | HHT1          |
| YIL036W                                          | CST6          | YBR200W                 | BEM1          |

| Predictions at threshold level 0.85 continued... |               |                         |               |
|--------------------------------------------------|---------------|-------------------------|---------------|
| Gene1 of predicted pair                          |               | Gene2 of predicted pair |               |
| Systematic Name                                  | Standard Name | Systematic Name         | Standard Name |
| YER173W                                          | RAD24         | YHR079C-A               | SAE3          |
| YKL213C                                          | DOA1          | YDR310C                 | SUM1          |
| YMR109W                                          | MYO5          | YMR032W                 | HOF1          |
| YLR079W                                          | SIC1          | YMR311C                 | GLC8          |
| YDL116W                                          | NUP84         | YLR399C                 | BDF1          |
| YIL159W                                          | BNR1          | YIL076W                 | SEC28         |
| YBL008W                                          | HIR1          | YBR009C                 | HHF1          |
| YOL145C                                          | CTR9          | YDR363W-A               | SEM1          |
| YBR200W                                          | BEM1          | YJL183W                 | MNN11         |
| YHR178W                                          | STB5          | YOR308C                 | SNU66         |
| YLR337C                                          | VRP1          | YHL027W                 | RIM101        |
| YMR055C                                          | BUB2          | YJR090C                 | GRR1          |
| YGL115W                                          | SNF4          | YNL236W                 | SIN4          |
| YKL139W                                          | CTK1          | YNL004W                 | HRB1          |
| YGR104C                                          | SRB5          | YOR001W                 | RRP6          |
| YDR254W                                          | CHL4          | YPR046W                 | MCM16         |
| YIL076W                                          | SEC28         | YGL054C                 | ERV14         |
| YHR010W                                          | RPL27A        | YIL133C                 | RPL16A        |
| YBR112C                                          | CYC8          | YLR176C                 | RFX1          |
| YPR072W                                          | NOT5          | YOL148C                 | SPT20         |
| YDR192C                                          | NUP42         | YKL068W                 | NUP100        |
| YOR038C                                          | HIR2          | YBR010W                 | HHT1          |
| YML095C                                          | RAD10         | YHL002W                 | HSE1          |
| YLR061W                                          | RPL22A        | YDR129C                 | SAC6          |
| YKR020W                                          | VPS51         | YPL195W                 | APL5          |
| YKR020W                                          | VPS51         | YJL183W                 | MNN11         |
| YHR079C                                          | IRE1          | YBR111W-A               | SUS1          |
| YJR135C                                          | MCM22         | YAL002W                 | VPS8          |
| YPL042C                                          | SSN3          | YNL215W                 | IES2          |

| Predictions at threshold level 0.85 continued... |               |                         |               |
|--------------------------------------------------|---------------|-------------------------|---------------|
| Gene1 of predicted pair                          |               | Gene2 of predicted pair |               |
| Systematic Name                                  | Standard Name | Systematic Name         | Standard Name |
| YGL066W                                          | SGF73         | YCL010C                 | SGF29         |
| YKL181W                                          | PRS1          | YER099C                 | PRS2          |
| YKL007W                                          | CAP1          | YGR080W                 | TWF1          |
| YDR293C                                          | SSD1          | YDL006W                 | PTC1          |
| YNL248C                                          | RPA49         | YLR410W                 | VIP1          |
| YDR265W                                          | PEX10         | YAL055W                 | PEX22         |
| YBL103C                                          | RTG3          | YML001W                 | YPT7          |
| YOR332W                                          | VMA4          | YDL185W                 | TFP1          |
| YBR065C                                          | ECM2          | YPR101W                 | SNT309        |
| YPL129W                                          | TAF14         | YLR399C                 | BDF1          |
| YBL102W                                          | SFT2          | YNL297C                 | MON2          |
| YOR327C                                          | SNC2          | YPR032W                 | SRO7          |
| YCR066W                                          | RAD18         | YLR032W                 | RAD5          |
| YLR337C                                          | VRP1          | YJR135C                 | MCM22         |
| YDR477W                                          | SNF1          | YDR028C                 | REG1          |
| YML016C                                          | PPZ1          | YNL225C                 | CNM67         |
| YJL124C                                          | LSM1          | YLR313C                 | SPH1          |
| YBR057C                                          | MUM2          | YPL096C-A               | ERI1          |
| YBR126C                                          | TPS1          | YMR261C                 | TPS3          |
| YPL129W                                          | TAF14         | YDL005C                 | MED2          |
| YGL161C                                          | YIP5          | YGL198W                 | YIP4          |
| YJL154C                                          | VPS35         | YCL001W                 | RER1          |
| YHR111W                                          | UBA4          | YGL253W                 | HXK2          |
| YCL037C                                          | SRO9          | YOR124C                 | UBP2          |
| YPR049C                                          | ATG11         | YLR423C                 | ATG17         |
| YDR293C                                          | SSD1          | YER033C                 | ZRG8          |
| YKL048C                                          | ELM1          | YPL161C                 | BEM4          |
| YHL031C                                          | GOS1          | YKR014C                 | YPT52         |
| YDR318W                                          | MCM21         | YJR090C                 | GRR1          |

| Predictions at threshold level 0.85 continued... |               |                         |               |
|--------------------------------------------------|---------------|-------------------------|---------------|
| Gene1 of predicted pair                          |               | Gene2 of predicted pair |               |
| Systematic Name                                  | Standard Name | Systematic Name         | Standard Name |
| YBL103C                                          | RTG3          | YJL095W                 | BCK1          |
| YDR335W                                          | MSN5          | YER139C                 | YER139C       |
| YDR245W                                          | MNN10         | YOR106W                 | VAM3          |
| YNL297C                                          | MON2          | YKR020W                 | VPS51         |
| YPR173C                                          | VPS4          | YKL041W                 | VPS24         |
| YHR013C                                          | ARD1          | YPR119W                 | CLB2          |
| YKR035W-A                                        | DID2          | YMR133W                 | REC114        |
| YIL038C                                          | NOT3          | YGR134W                 | CAF130        |
| YJL044C                                          | GYP6          | YDR456W                 | NHX1          |
| YNL044W                                          | YIP3          | YNL051W                 | COG5          |
| YDR443C                                          | SSN2          | YPR072W                 | NOT5          |
| YNL264C                                          | PDR17         | YNL079C                 | TPM1          |
| YHR060W                                          | VMA22         | YER044C                 | ERG28         |
| YHR084W                                          | STE12         | YBR083W                 | TEC1          |
| YLR170C                                          | APS1          | YDR358W                 | GGA1          |
| YNL094W                                          | APP1          | YLR144C                 | ACF2          |
| YBR171W                                          | SEC66         | YHL011C                 | PRS3          |
| YGL175C                                          | SAE2          | YDR076W                 | RAD55         |
| YER087C-B                                        | SBH1          | YNR049C                 | MSO1          |
| YMR164C                                          | MSS11         | YER109C                 | FLO8          |
| YJL127C                                          | SPT10         | YMR202W                 | ERG2          |
| YBR217W                                          | ATG12         | YHR171W                 | ATG7          |
| YNL243W                                          | SLA2          | YLR234W                 | TOP3          |
| YDR261C                                          | EXG2          | YML071C                 | COG8          |
| YDR383C                                          | NKP1          | YDR318W                 | MCM21         |
| YNL069C                                          | RPL16B        | YGL246C                 | RAI1          |
| YKL073W                                          | LHS1          | YJL159W                 | HSP150        |
| YHR119W                                          | SET1          | YAR003W                 | SWD1          |
| YFL026W                                          | STE2          | YJR086W                 | STE18         |

| Predictions at threshold level 0.85 continued... |               |                         |               |
|--------------------------------------------------|---------------|-------------------------|---------------|
| Gene1 of predicted pair                          |               | Gene2 of predicted pair |               |
| Systematic Name                                  | Standard Name | Systematic Name         | Standard Name |
| YDR477W                                          | SNF1          | YGL208W                 | SIP2          |
| YLR432W                                          | IMD3          | YHR216W                 | IMD2          |
| YDR443C                                          | SSN2          | YPL248C                 | GAL4          |
| YMR198W                                          | CIK1          | YPR046W                 | MCM16         |
| YLR234W                                          | TOP3          | YPR119W                 | CLB2          |
| YDR484W                                          | VPS52         | YGL095C                 | VPS45         |
| YGL153W                                          | PEX14         | YNL214W                 | PEX17         |
| YPL042C                                          | SSN3          | YCR084C                 | TUP1          |
| YBL008W                                          | HIR1          | YOR039W                 | CKB2          |
| YDR260C                                          | SWM1          | YPR046W                 | MCM16         |
| YIL076W                                          | SEC28         | YJL183W                 | MNN11         |
| YLR447C                                          | VMA6          | YHR060W                 | VMA22         |
| YNL153C                                          | GIM3          | YGL190C                 | CDC55         |
| YOR076C                                          | SKI7          | YHR081W                 | LRP1          |
| YPL161C                                          | BEM4          | YDR218C                 | SPR28         |
| YDL161W                                          | ENT1          | YKR001C                 | VPS1          |
| YDR507C                                          | GIN4          | YKL101W                 | HSL1          |
| YBR258C                                          | SHG1          | YDR469W                 | SDC1          |
| YDL160C                                          | DHH1          | YER129W                 | SAK1          |
| YCR084C                                          | TUP1          | YBR089C-A               | NHP6B         |
| YHL002W                                          | HSE1          | YNR006W                 | VPS27         |
| YOR193W                                          | PEX27         | YMR204C                 | INP1          |
| YLR083C                                          | EMP70         | YAL002W                 | VPS8          |
| YDR480W                                          | DIG2          | YMR199W                 | CLN1          |
| YBR127C                                          | VMA2          | YHR039C-A               | VMA10         |
| YPR017C                                          | DSS4          | YAL030W                 | SNC1          |
| YJL124C                                          | LSM1          | YNL107W                 | YAF9          |
| YOR324C                                          | FRT1          | YML057W                 | CMP2          |
| YEL065W                                          | SIT1          | YKL048C                 | ELM1          |

| Predictions at threshold level 0.85 continued... |               |                         |               |
|--------------------------------------------------|---------------|-------------------------|---------------|
| Gene1 of predicted pair                          |               | Gene2 of predicted pair |               |
| Systematic Name                                  | Standard Name | Systematic Name         | Standard Name |
| YNL094W                                          | APP1          | YJL187C                 | SWE1          |
| YNL307C                                          | MCK1          | YML001W                 | YPT7          |
| YBR200W                                          | BEM1          | YGL031C                 | RPL24A        |
| YBL008W                                          | HIR1          | YDR073W                 | SNF11         |
| YPL234C                                          | TFP3          | YDL006W                 | PTC1          |
| YKR069W                                          | MET1          | YMR109W                 | MYO5          |
| YLR337C                                          | VRP1          | YAL002W                 | VPS8          |
| YIL076W                                          | SEC28         | YJL004C                 | SYS1          |
| YKL139W                                          | CTK1          | YDR289C                 | RTT103        |
| YJL183W                                          | MNN11         | YDL192W                 | ARF1          |
| YIL148W                                          | RPL40A        | YML057W                 | CMP2          |
| YLR360W                                          | VPS38         | YJL036W                 | SNX4          |
| YLR079W                                          | SIC1          | YMR055C                 | BUB2          |
| YEL022W                                          | GEA2          | YDL137W                 | ARF2          |
| YBR108W                                          | YBR108W       | YOR358W                 | HAP5          |
| YLR095C                                          | IOC2          | YGL033W                 | HOP2          |
| YOR156C                                          | NFI1          | YPL161C                 | BEM4          |
| YDL184C                                          | RPL41A        | YGL115W                 | SNF4          |
| YBR171W                                          | SEC66         | YNL079C                 | TPM1          |
| YKR059W                                          | TIF1          | YBR274W                 | CHK1          |
| YDR192C                                          | NUP42         | YNL049C                 | SFB2          |
| YML115C                                          | VAN1          | YNL041C                 | COG6          |
| YNL025C                                          | SSN8          | YNL215W                 | IES2          |
| YPL024W                                          | RMI1          | YIL076W                 | SEC28         |
| YDL161W                                          | ENT1          | YBL047C                 | EDE1          |
| YOR327C                                          | SNC2          | YAL002W                 | VPS8          |
| YDR320C                                          | SWA2          | YDR080W                 | VPS41         |
| YLR006C                                          | SSK1          | YBR200W                 | BEM1          |
| YHR119W                                          | SET1          | YJL168C                 | SET2          |



| Predictions at threshold level 0.85 continued... |               |                         |               |
|--------------------------------------------------|---------------|-------------------------|---------------|
| Gene1 of predicted pair                          |               | Gene2 of predicted pair |               |
| Systematic Name                                  | Standard Name | Systematic Name         | Standard Name |
| YOR332W                                          | VMA4          | YLR447C                 | VMA6          |
| YLR371W                                          | ROM2          | YJL183W                 | MNN11         |
| YDR479C                                          | PEX29         | YBR168W                 | PEX32         |
| YDR293C                                          | SSD1          | YGL054C                 | ERV14         |
| YDR320C                                          | SWA2          | YDR153C                 | ENT5          |
| YDR174W                                          | HMO1          | YPL152W                 | RRD2          |
| YBR173C                                          | UMP1          | YHR200W                 | RPN10         |
| YMR080C                                          | NAM7          | YGR072W                 | UPF3          |
| YLL007C                                          | YLL007C       | YLR360W                 | VPS38         |
| YMR201C                                          | RAD14         | YBR114W                 | RAD16         |
| YLR452C                                          | SST2          | YOL018C                 | TLG2          |
| YLR337C                                          | VRP1          | YJR090C                 | GRR1          |
| YFR032C-A                                        | RPL29         | YKR020W                 | VPS51         |
| YDL059C                                          | RAD59         | YOR368W                 | RAD17         |
| YOR047C                                          | STD1          | YDL194W                 | SNF3          |
| YPL161C                                          | BEM4          | YJL095W                 | BCK1          |
| YER120W                                          | SCS2          | YOL108C                 | INO4          |
| YMR231W                                          | PEP5          | YAL002W                 | VPS8          |
| YGR003W                                          | CUL3          | YDR139C                 | RUB1          |
| YMR164C                                          | MSS11         | YCR024C-A               | PMP1          |
| YNL041C                                          | COG6          | YLR093C                 | NYV1          |
| YDR129C                                          | SAC6          | YML097C                 | VPS9          |
| YDL056W                                          | MBP1          | YLR182W                 | SWI6          |
| YER042W                                          | MXR1          | YLR093C                 | NYV1          |
| YIL159W                                          | BNR1          | YML001W                 | YPT7          |
| YJL172W                                          | CPS1          | YDL083C                 | RPS16B        |
| YHR156C                                          | LIN1          | YBR200W                 | BEM1          |
| YJR099W                                          | YUH1          | YDR139C                 | RUB1          |
| YMR179W                                          | SPT21         | YGL163C                 | RAD54         |

| Predictions at threshold level 0.85 continued... |               |                         |               |
|--------------------------------------------------|---------------|-------------------------|---------------|
| Gene1 of predicted pair                          |               | Gene2 of predicted pair |               |
| Systematic Name                                  | Standard Name | Systematic Name         | Standard Name |
| YGR072W                                          | UPF3          | YNL238W                 | KEX2          |
| YHR098C                                          | SFB3          | YMR048W                 | CSM3          |
| YOR270C                                          | VPH1          | YKL119C                 | VPH2          |
| YDR225W                                          | HTA1          | YNL107W                 | YAF9          |
| YIL076W                                          | SEC28         | YMR133W                 | REC114        |
| YGR241C                                          | YAP1802       | YDL226C                 | GCS1          |
| YEL009C                                          | GCN4          | YNL236W                 | SIN4          |
| YJL127C                                          | SPT10         | YPL253C                 | VIK1          |
| YLR429W                                          | CRN1          | YNL107W                 | YAF9          |
| YDR260C                                          | SWM1          | YJR135C                 | MCM22         |
| YPL042C                                          | SSN3          | YNL236W                 | SIN4          |
| YLR181C                                          | VTA1          | YKL041W                 | VPS24         |
| YOL018C                                          | TLG2          | YJL164C                 | TPK1          |
| YNL293W                                          | MSB3          | YGR152C                 | RSR1          |
| YIL076W                                          | SEC28         | YGL223C                 | COG1          |
| YLR258W                                          | GSY2          | YPR119W                 | CLB2          |
| YER044C                                          | ERG28         | YOL121C                 | RPS19A        |
| YGL033W                                          | HOP2          | YMR152W                 | YIM1          |
| YMR224C                                          | MRE11         | YMR133W                 | REC114        |
| YAL014C                                          | SYN8          | YAL030W                 | SNC1          |
| YHR039C-A                                        | VMA10         | YJR033C                 | RAV1          |
| YNL236W                                          | SIN4          | YLR357W                 | RSC2          |
| YOR290C                                          | SNF2          | YOR038C                 | HIR2          |
| YMR167W                                          | MLH1          | YOL090W                 | MSH2          |
| YEL051W                                          | VMA8          | YJR033C                 | RAV1          |
| YOR191W                                          | RIS1          | YGR072W                 | UPF3          |
| YJL127C                                          | SPT10         | YDR254W                 | CHL4          |
| YOR001W                                          | RRP6          | YJL124C                 | LSM1          |
| YNL238W                                          | KEX2          | YKR014C                 | YPT52         |

| Predictions at threshold level 0.85 continued... |               |                         |               |
|--------------------------------------------------|---------------|-------------------------|---------------|
| Gene1 of predicted pair                          |               | Gene2 of predicted pair |               |
| Systematic Name                                  | Standard Name | Systematic Name         | Standard Name |
| YKL117W                                          | SBA1          | YGL016W                 | KAP122        |
| YGR249W                                          | MGA1          | YML001W                 | YPT7          |
| YLR381W                                          | CTF3          | YMR055C                 | BUB2          |
| YGL033W                                          | HOP2          | YOR327C                 | SNC2          |
| YML038C                                          | YMD8          | YAL002W                 | VPS8          |
| YGR040W                                          | KSS1          | YLR362W                 | STE11         |
| YPL089C                                          | RLM1          | YKL161C                 | YKL161C       |
| YNL041C                                          | COG6          | YOR327C                 | SNC2          |
| YPL096C-A                                        | ERI1          | YGL200C                 | EMP24         |
| YBL017C                                          | PEP1          | YDR484W                 | VPS52         |
| YMR109W                                          | MYO5          | YNL107W                 | YAF9          |
| YMR164C                                          | MSS11         | YBR083W                 | TEC1          |
| YNL243W                                          | SLA2          | YPL051W                 | ARL3          |
| YAL024C                                          | LTE1          | YDR146C                 | SWI5          |
| YDR097C                                          | MSH6          | YOL090W                 | MSH2          |
| YPL198W                                          | RPL7B         | YOR078W                 | BUD21         |
| YIR003W                                          | YIR003W       | YCR088W                 | ABP1          |
| YER114C                                          | BOI2          | YML109W                 | ZDS2          |
| YBR131W                                          | CCZ1          | YOR106W                 | VAM3          |
| YPL022W                                          | RAD1          | YDL059C                 | RAD59         |
| YML016C                                          | PPZ1          | YOL091W                 | SPO21         |
| YLR288C                                          | MEC3          | YPL022W                 | RAD1          |
| YJL036W                                          | SNX4          | YER122C                 | GLO3          |
| YMR095C                                          | SNO1          | YOR270C                 | VPH1          |
| YOR109W                                          | INP53         | YER122C                 | GLO3          |
| YDR378C                                          | LSM6          | YLR350W                 | ORM2          |
| YHL031C                                          | GOS1          | YKR020W                 | VPS51         |
| YHR119W                                          | SET1          | YPL240C                 | HSP82         |
| YLR135W                                          | SLX4          | YDR207C                 | UME6          |

| Predictions at threshold level 0.85 continued... |               |                         |               |
|--------------------------------------------------|---------------|-------------------------|---------------|
| Gene1 of predicted pair                          |               | Gene2 of predicted pair |               |
| Systematic Name                                  | Standard Name | Systematic Name         | Standard Name |
| YOR033C                                          | EXO1          | YCR086W                 | CSM1          |
| YBL103C                                          | RTG3          | YNL307C                 | MCK1          |
| YNL027W                                          | CRZ1          | YIL033C                 | BCY1          |
| YDL232W                                          | OST4          | YOR085W                 | OST3          |
| YKL007W                                          | CAP1          | YOR367W                 | SCP1          |
| YPL256C                                          | CLN2          | YDR207C                 | UME6          |
| YPL045W                                          | VPS16         | YLR093C                 | NYV1          |
| YGL025C                                          | PGD1          | YGL151W                 | NUT1          |
| YNL106C                                          | INP52         | YDR254W                 | CHL4          |
| YLR178C                                          | TFS1          | YOL081W                 | IRA2          |
| YJL210W                                          | PEX2          | YNL214W                 | PEX17         |
| YHR152W                                          | SPO12         | YPR119W                 | CLB2          |
| YLR206W                                          | ENT2          | YBL106C                 | SRO77         |
| YDR254W                                          | CHL4          | YDR183W                 | PLP1          |
| YOL100W                                          | PKH2          | YPL004C                 | LSP1          |
| YNL236W                                          | SIN4          | YPL106C                 | SSE1          |
| YJL124C                                          | LSM1          | YLR429W                 | CRN1          |
| YNL145W                                          | MFA2          | YPL220W                 | RPL1A         |
| YDR202C                                          | RAV2          | YDL185W                 | TFP1          |
| YJR040W                                          | GEF1          | YCR066W                 | RAD18         |
| YKL213C                                          | DOA1          | YIR005W                 | IST3          |
| YMR116C                                          | ASC1          | YNL016W                 | PUB1          |
| YOR109W                                          | INP53         | YDR153C                 | ENT5          |
| YDR448W                                          | ADA2          | YGR252W                 | GCN5          |
| YJR135C                                          | MCM22         | YFR036W                 | CDC26         |
| YGL133W                                          | ITC1          | YML095C                 | RAD10         |
| YHR086W                                          | NAM8          | YKL074C                 | MUD2          |
| YPR120C                                          | CLB5          | YPR119W                 | CLB2          |
| YBR215W                                          | HPC2          | YJR035W                 | RAD26         |

| Predictions at threshold level 0.85 continued... |               |                         |               |
|--------------------------------------------------|---------------|-------------------------|---------------|
| Gene1 of predicted pair                          |               | Gene2 of predicted pair |               |
| Systematic Name                                  | Standard Name | Systematic Name         | Standard Name |
| YBR107C                                          | IML3          | YDR318W                 | MCM21         |
| YKL214C                                          | YRA2          | YHR167W                 | THP2          |
| YMR054W                                          | STV1          | YJR033C                 | RAV1          |
| YNL206C                                          | RTT106        | YOR038C                 | HIR2          |
| YDR004W                                          | RAD57         | YML095C                 | RAD10         |
| YMR167W                                          | MLH1          | YOR368W                 | RAD17         |
| YOR145C                                          | PNO1          | YOR001W                 | RRP6          |
| YOR327C                                          | SNC2          | YNR049C                 | MSO1          |
| YHR158C                                          | KEL1          | YOL081W                 | IRA2          |
| YGL025C                                          | PGD1          | YNL236W                 | SIN4          |
| YIL002C                                          | INP51         | YDR080W                 | VPS41         |
| YDR448W                                          | ADA2          | YNL031C                 | HHT2          |
| YDL005C                                          | MED2          | YJL140W                 | RPB4          |
| YML099C                                          | ARG81         | YMR042W                 | ARG80         |
| YDR245W                                          | MNN10         | YHL002W                 | HSE1          |
| YLR093C                                          | NYV1          | YEL013W                 | VAC8          |
| YOR039W                                          | CKB2          | YPR119W                 | CLB2          |
| YLR170C                                          | APS1          | YPL259C                 | APM1          |
| YDR009W                                          | GAL3          | YML051W                 | GAL80         |
| YGL003C                                          | CDH1          | YOR368W                 | RAD17         |
| YOR212W                                          | STE4          | YBL016W                 | FUS3          |
| YDL149W                                          | ATG9          | YLR431C                 | ATG23         |
| YFR008W                                          | FAR7          | YMR052W                 | FAR3          |
| YPL195W                                          | APL5          | YGL124C                 | MON1          |
| YBR057C                                          | MUM2          | YDR318W                 | MCM21         |
| YDR378C                                          | LSM6          | YDR440W                 | DOT1          |
| YOR180C                                          | DCI1          | YLR284C                 | ECI1          |
| YDR309C                                          | GIC2          | YDR310C                 | SUM1          |
| YJL172W                                          | CPS1          | YNL076W                 | MKS1          |

| Predictions at threshold level 0.85 continued... |               |                         |               |
|--------------------------------------------------|---------------|-------------------------|---------------|
| Gene1 of predicted pair                          |               | Gene2 of predicted pair |               |
| Systematic Name                                  | Standard Name | Systematic Name         | Standard Name |
| YOR358W                                          | HAP5          | YPL248C                 | GAL4          |
| YNR052C                                          | POP2          | YBR200W                 | BEM1          |
| YKL032C                                          | IXR1          | YKR020W                 | VPS51         |
| YPL022W                                          | RAD1          | YBR274W                 | CHK1          |
| YPL049C                                          | DIG1          | YDR480W                 | DIG2          |
| YCR088W                                          | ABP1          | YMR109W                 | MYO5          |
| YDR320C                                          | SWA2          | YDL006W                 | PTC1          |
| YPR017C                                          | DSS4          | YIL076W                 | SEC28         |
| YBR279W                                          | PAF1          | YBR089C-A               | NHP6B         |
| YJL210W                                          | PEX2          | YMR026C                 | PEX12         |
| YPL050C                                          | MNN9          | YJL095W                 | BCK1          |
| YDR176W                                          | NGG1          | YNL031C                 | HHT2          |
| YLR240W                                          | VPS34         | YOR036W                 | PEP12         |
| YER110C                                          | KAP123        | YLR447C                 | VMA6          |
| YML109W                                          | ZDS2          | YDR227W                 | SIR4          |
| YDR192C                                          | NUP42         | YGL100W                 | SEH1          |
| YHR098C                                          | SFB3          | YGL223C                 | COG1          |
| YNL215W                                          | IES2          | YJR063W                 | RPA12         |
| YKR101W                                          | SIR1          | YML102W                 | CAC2          |
| YCR065W                                          | HCM1          | YCR077C                 | PAT1          |
| YIL033C                                          | BCY1          | YGR188C                 | BUB1          |
| YOR106W                                          | VAM3          | YEL036C                 | ANP1          |
| YCR002C                                          | CDC10         | YCL024W                 | KCC4          |
| YOR127W                                          | RGA1          | YDL155W                 | CLB3          |
| YOL145C                                          | CTR9          | YDR469W                 | SDC1          |
| YDR358W                                          | GGA1          | YDL137W                 | ARF2          |
| YFR010W                                          | UBP6          | YBR107C                 | IML3          |
| YKL010C                                          | UFD4          | YJL095W                 | BCK1          |
| YGR104C                                          | SRB5          | YDR146C                 | SWI5          |

| Predictions at threshold level 0.85 continued... |               |                         |               |
|--------------------------------------------------|---------------|-------------------------|---------------|
| Gene1 of predicted pair                          |               | Gene2 of predicted pair |               |
| Systematic Name                                  | Standard Name | Systematic Name         | Standard Name |
| YMR224C                                          | MRE11         | YDR225W                 | HTA1          |
| YIL153W                                          | RRD1          | YGL190C                 | CDC55         |
| YBR009C                                          | HHF1          | YLR357W                 | RSC2          |
| YIL034C                                          | CAP2          | YNL307C                 | MCK1          |
| YNL206C                                          | RTT106        | YLR399C                 | BDF1          |
| YGL033W                                          | HOP2          | YJR056C                 | YJR056C       |
| YDR244W                                          | PEX5          | YLR284C                 | ECI1          |
| YAL024C                                          | LTE1          | YLR006C                 | SSK1          |
| YMR116C                                          | ASC1          | YJR035W                 | RAD26         |
| YPL161C                                          | BEM4          | YDR309C                 | GIC2          |
| YIR003W                                          | YIR003W       | YPR171W                 | BSP1          |
| YDR200C                                          | VPS64         | YMR052W                 | FAR3          |
| YMR095C                                          | SNO1          | YMR311C                 | GLC8          |
| YPR131C                                          | NAT3          | YKR024C                 | DBP7          |
| YFR031C-A                                        | RPL2A         | YBL025W                 | RRN10         |
| YER115C                                          | SPR6          | YGR059W                 | SPR3          |
| YBR200W                                          | BEM1          | YBL085W                 | BOI1          |
| YGL095C                                          | VPS45         | YOL018C                 | TLG2          |
| YBL103C                                          | RTG3          | YOR035C                 | SHE4          |
| YJR140C                                          | HIR3          | YOR038C                 | HIR2          |
| YBR228W                                          | SLX1          | YGR071C                 | YGR071C       |
| YGL066W                                          | SGF73         | YBR111W-A               | SUS1          |
| YIL076W                                          | SEC28         | YHR060W                 | VMA22         |
| YLR135W                                          | SLX4          | YER116C                 | SLX8          |
| YIL156W                                          | UBP7          | YPL246C                 | RBD2          |
| YPR120C                                          | CLB5          | YDL226C                 | GCS1          |
| YDR443C                                          | SSN2          | YCR081W                 | SRB8          |
| YKR014C                                          | YPT52         | YLR093C                 | NYV1          |
| YER054C                                          | GIP2          | YML016C                 | PPZ1          |

| Predictions at threshold level 0.85 continued... |               |                         |               |
|--------------------------------------------------|---------------|-------------------------|---------------|
| Gene1 of predicted pair                          |               | Gene2 of predicted pair |               |
| Systematic Name                                  | Standard Name | Systematic Name         | Standard Name |
| YMR109W                                          | MYO5          | YBR260C                 | RGD1          |
| YPL115C                                          | BEM3          | YPL161C                 | BEM4          |
| YPR018W                                          | RLF2          | YNL079C                 | TPM1          |
| YHR052W                                          | CIC1          | YHR010W                 | RPL27A        |
| YNL209W                                          | SSB2          | YDR477W                 | SNF1          |
| YFR010W                                          | UBP6          | YBR173C                 | UMP1          |
| YHR060W                                          | VMA22         | YKL080W                 | VMA5          |
| YBR107C                                          | IML3          | YLR254C                 | NDL1          |
| YDR176W                                          | NGG1          | YGL221C                 | NIF3          |
| YLR360W                                          | VPS38         | YHR114W                 | BZZ1          |
| YPL024W                                          | RMI1          | YDR076W                 | RAD55         |
| YDR448W                                          | ADA2          | YLR399C                 | BDF1          |
| YHR052W                                          | CIC1          | YKR024C                 | DBP7          |
| YJL154C                                          | VPS35         | YHR114W                 | BZZ1          |
| YHR171W                                          | ATG7          | YLR093C                 | NYV1          |
| YPL129W                                          | TAF14         | YJL124C                 | LSM1          |
| YHR200W                                          | RPN10         | YLR182W                 | SWI6          |
| YBR188C                                          | NTC20         | YKL074C                 | MUD2          |
| YOL018C                                          | TLG2          | YER122C                 | GLO3          |
| YER114C                                          | BOI2          | YER124C                 | DSE1          |
| YER161C                                          | SPT2          | YOR124C                 | UBP2          |
| YOR324C                                          | FRT1          | YLR433C                 | CNA1          |
| YOR270C                                          | VPH1          | YDR202C                 | RAV2          |
| YPL234C                                          | TFP3          | YGR105W                 | VMA21         |
| YDR293C                                          | SSD1          | YKR028W                 | SAP190        |
| YPL161C                                          | BEM4          | YJL187C                 | SWE1          |
| YML051W                                          | GAL80         | YPL248C                 | GAL4          |
| YJL029C                                          | VPS53         | YOR036W                 | PEP12         |
| YGL223C                                          | COG1          | YPL050C                 | MNN9          |



| Predictions at threshold level 0.85 continued... |               |                         |               |
|--------------------------------------------------|---------------|-------------------------|---------------|
| Gene1 of predicted pair                          |               | Gene2 of predicted pair |               |
| Systematic Name                                  | Standard Name | Systematic Name         | Standard Name |
| YOR035C                                          | SHE4          | YLR398C                 | SKI2          |
| YDR153C                                          | ENT5          | YDR310C                 | SUM1          |
| YBR274W                                          | CHK1          | YJL124C                 | LSM1          |
| YGL251C                                          | HFM1          | YDR378C                 | LSM6          |
| YGR072W                                          | UPF3          | YJR040W                 | GEF1          |
| YDL006W                                          | PTC1          | YHR108W                 | GGA2          |
| YIL159W                                          | BNR1          | YLR180W                 | SAM1          |
| YDL020C                                          | RPN4          | YIL007C                 | NAS2          |
| YCR063W                                          | BUD31         | YPL213W                 | LEA1          |
| YDR289C                                          | RTT103        | YGL246C                 | RAI1          |
| YOR069W                                          | VPS5          | YJL004C                 | SYS1          |
| YNL307C                                          | MCK1          | YGL115W                 | SNF4          |
| YDR265W                                          | PEX10         | YGL153W                 | PEX14         |
| YHR084W                                          | STE12         | YPL220W                 | RPL1A         |
| YJL053W                                          | PEP8          | YER122C                 | GLO3          |
| YDR245W                                          | MNN10         | YJL124C                 | LSM1          |
| YER114C                                          | BOI2          | YMR055C                 | BUB2          |
| YNL242W                                          | ATG2          | YDL149W                 | ATG9          |
| YFL026W                                          | STE2          | YDR264C                 | AKR1          |
| YJR024C                                          | MDE1          | YER115C                 | SPR6          |
| YOL145C                                          | CTR9          | YGR135W                 | PRE9          |
| YML001W                                          | YPT7          | YOR035C                 | SHE4          |
| YOR332W                                          | VMA4          | YEL051W                 | VMA8          |
| YDR439W                                          | LRS4          | YBR200W                 | BEM1          |
| YDR225W                                          | HTA1          | YGL066W                 | SGF73         |
| YOR080W                                          | DIA2          | YPR046W                 | MCM16         |
| YLR337C                                          | VRP1          | YNL215W                 | IES2          |
| YBR200W                                          | BEM1          | YGR188C                 | BUB1          |
| YOR127W                                          | RGA1          | YJR033C                 | RAV1          |

| Predictions at threshold level 0.85 continued... |               |                         |               |
|--------------------------------------------------|---------------|-------------------------|---------------|
| Gene1 of predicted pair                          |               | Gene2 of predicted pair |               |
| Systematic Name                                  | Standard Name | Systematic Name         | Standard Name |
| YML016C                                          | PPZ1          | YLR399C                 | BDF1          |
| YER122C                                          | GLO3          | YOL108C                 | INO4          |
| YOR109W                                          | INP53         | YDL226C                 | GCS1          |
| YBR171W                                          | SEC66         | YPL234C                 | TFP3          |
| YHR171W                                          | ATG7          | YBL078C                 | ATG8          |
| YLR315W                                          | NKP2          | YLR254C                 | NDL1          |
| YKR101W                                          | SIR1          | YDR227W                 | SIR4          |
| YDL101C                                          | DUN1          | YMR116C                 | ASC1          |
| YMR091C                                          | NPL6          | YGR275W                 | RTT102        |
| YKL068W                                          | NUP100        | YML057W                 | CMP2          |
| YDR225W                                          | HTA1          | YDL042C                 | SIR2          |
| YPR173C                                          | VPS4          | YDR486C                 | VPS60         |
| YOR127W                                          | RGA1          | YDR507C                 | GIN4          |
| YPL024W                                          | RMI1          | YMR167W                 | MLH1          |
| YNL238W                                          | KEX2          | YML071C                 | COG8          |
| YAL024C                                          | LTE1          | YLR079W                 | SIC1          |
| YNL041C                                          | COG6          | YJL183W                 | MNN11         |
| YMR198W                                          | CIK1          | YGL115W                 | SNF4          |
| YOR080W                                          | DIA2          | YAL002W                 | VPS8          |
| YML016C                                          | PPZ1          | YHR012W                 | VPS29         |
| YPL161C                                          | BEM4          | YPL018W                 | CTF19         |
| YIL076W                                          | SEC28         | YJR032W                 | CPR7          |
| YDL127W                                          | PCL2          | YDR146C                 | SWI5          |
| YBL103C                                          | RTG3          | YGL003C                 | CDH1          |
| YIL076W                                          | SEC28         | YOR035C                 | SHE4          |
| YLR360W                                          | VPS38         | YEL036C                 | ANP1          |
| YNL068C                                          | FKH2          | YBR200W                 | BEM1          |
| YDL077C                                          | VAM6          | YEL060C                 | PRB1          |
| YDL116W                                          | NUP84         | YDL226C                 | GCS1          |

| Predictions at threshold level 0.85 continued... |               |                         |               |
|--------------------------------------------------|---------------|-------------------------|---------------|
| Gene1 of predicted pair                          |               | Gene2 of predicted pair |               |
| Systematic Name                                  | Standard Name | Systematic Name         | Standard Name |
| YBR215W                                          | HPC2          | YGR188C                 | BUB1          |
| YPR046W                                          | MCM16         | YLR254C                 | NDL1          |
| YPR051W                                          | MAK3          | YML001W                 | YPT7          |
| YKR020W                                          | VPS51         | YKR014C                 | YPT52         |
| YHR178W                                          | STB5          | YJR090C                 | GRR1          |
| YFR036W                                          | CDC26         | YPR046W                 | MCM16         |
| YHR060W                                          | VMA22         | YKR035W-A               | DID2          |
| YMR116C                                          | ASC1          | YMR284W                 | YKU70         |
| YFR024C-A                                        | LSB3          | YJL151C                 | SNA3          |
| YLR079W                                          | SIC1          | YDR439W                 | LRS4          |
| YDL185W                                          | TFP1          | YPL234C                 | TFP3          |
| YNL293W                                          | MSB3          | YGL198W                 | YIP4          |
| YLR381W                                          | CTF3          | YGR184C                 | UBR1          |
| YHR012W                                          | VPS29         | YMR022W                 | UBC7          |
| YJR135C                                          | MCM22         | YGR188C                 | BUB1          |
| YHR119W                                          | SET1          | YGL058W                 | RAD6          |
| YNL238W                                          | KEX2          | YJL004C                 | SYS1          |
| YMR224C                                          | MRE11         | YLR357W                 | RSC2          |
| YMR055C                                          | BUB2          | YIR005W                 | IST3          |
| YGR252W                                          | GCN5          | YPL248C                 | GAL4          |
| YFR031C-A                                        | RPL2A         | YDR358W                 | GGA1          |
| YPL024W                                          | RMI1          | YHR178W                 | STB5          |
| YJL172W                                          | CPS1          | YHR039C-A               | VMA10         |
| YDR395W                                          | SXM1          | YDL116W                 | NUP84         |
| YLR109W                                          | AHP1          | YML028W                 | TSA1          |
| YGL223C                                          | COG1          | YER122C                 | GLO3          |
| YGL190C                                          | CDC55         | YEL003W                 | GIM4          |
| YLR191W                                          | PEX13         | YPR119W                 | CLB2          |
| YPL106C                                          | SSE1          | YPR119W                 | CLB2          |

| Predictions at threshold level 0.85 continued... |               |                         |               |
|--------------------------------------------------|---------------|-------------------------|---------------|
| Gene1 of predicted pair                          |               | Gene2 of predicted pair |               |
| Systematic Name                                  | Standard Name | Systematic Name         | Standard Name |
| YPR046W                                          | MCM16         | YKL114C                 | APN1          |
| YBL058W                                          | SHP1          | YIL076W                 | SEC28         |
| YGR275W                                          | RTT102        | YHL025W                 | SNF6          |
| YDL006W                                          | PTC1          | YDR207C                 | UME6          |
| YDR004W                                          | RAD57         | YBR173C                 | UMP1          |
| YML038C                                          | YMD8          | YOL018C                 | TLG2          |
| YER044C                                          | ERG28         | YMR152W                 | YIM1          |
| YDL113C                                          | ATG20         | YJL036W                 | SNX4          |
| YPL129W                                          | TAF14         | YJL140W                 | RPB4          |
| YDR477W                                          | SNF1          | YOR140W                 | SFL1          |
| YPL195W                                          | APL5          | YNL051W                 | COG5          |
| YEL009C                                          | GCN4          | YBR289W                 | SNF5          |
| YLR018C                                          | POM34         | YML103C                 | NUP188        |
| YPR046W                                          | MCM16         | YGR188C                 | BUB1          |
| YML071C                                          | COG8          | YAL002W                 | VPS8          |
| YPL024W                                          | RMI1          | YJL095W                 | BCK1          |
| YBR127C                                          | VMA2          | YDL226C                 | GCS1          |
| YMR109W                                          | MYO5          | YLR370C                 | ARC18         |
| YDR477W                                          | SNF1          | YNL079C                 | TPM1          |
| YMR089C                                          | YTA12         | YKL041W                 | VPS24         |
| YDR146C                                          | SWI5          | YPR120C                 | CLB5          |
| YER179W                                          | DMC1          | YDR146C                 | SWI5          |
| YHR178W                                          | STB5          | YLR386W                 | VAC14         |
| YBR200W                                          | BEM1          | YNL107W                 | YAF9          |
| YOL018C                                          | TLG2          | YPR032W                 | SRO7          |
| YBL078C                                          | ATG8          | YDR080W                 | VPS41         |
| YNL031C                                          | HHT2          | YDR440W                 | DOT1          |
| YER174C                                          | GRX4          | YGR262C                 | BUD32         |
| YKL010C                                          | UFD4          | YDR245W                 | MNN10         |

| Predictions at threshold level 0.85 continued... |               |                         |               |
|--------------------------------------------------|---------------|-------------------------|---------------|
| Gene1 of predicted pair                          |               | Gene2 of predicted pair |               |
| Systematic Name                                  | Standard Name | Systematic Name         | Standard Name |
| YDR245W                                          | MNN10         | YLR371W                 | ROM2          |
| YMR016C                                          | SOK2          | YMR037C                 | MSN2          |
| YGL124C                                          | MON1          | YAL002W                 | VPS8          |
| YAL024C                                          | LTE1          | YDR439W                 | LRS4          |
| YDR439W                                          | LRS4          | YCR086W                 | CSM1          |
| YBR264C                                          | YPT10         | YML001W                 | YPT7          |
| YOR127W                                          | RGA1          | YBR200W                 | BEM1          |
| YNL139C                                          | RLR1          | YCL011C                 | GBP2          |
| YLR080W                                          | EMP46         | YFL048C                 | EMP47         |
| YLR234W                                          | TOP3          | YAL002W                 | VPS8          |
| YLR452C                                          | SST2          | YDL192W                 | ARF1          |
| YNR058W                                          | BIO3          | YFR021W                 | ATG18         |
| YOR195W                                          | SLK19         | YJL006C                 | CTK2          |
| YPL024W                                          | RMI1          | YHR013C                 | ARD1          |
| YOR308C                                          | SNU66         | YAL002W                 | VPS8          |
| YIL156W                                          | UBP7          | YMR109W                 | MYO5          |
| YOR275C                                          | RIM20         | YNL079C                 | TPM1          |
| YJR052W                                          | RAD7          | YER162C                 | RAD4          |
| YDR009W                                          | GAL3          | YPL248C                 | GAL4          |
| YGR104C                                          | SRB5          | YBR010W                 | HHT1          |
| YBR108W                                          | YBR108W       | YDR289C                 | RTT103        |
| YDR202C                                          | RAV2          | YEL051W                 | VMA8          |
| YLR360W                                          | VPS38         | YOL108C                 | INO4          |
| YDR358W                                          | GGA1          | YAL030W                 | SNC1          |
| YFL004W                                          | VTC2          | YER072W                 | VTC1          |
| YBL016W                                          | FUS3          | YJL157C                 | FAR1          |
| YER110C                                          | KAP123        | YMR109W                 | MYO5          |
| YOR109W                                          | INP53         | YOR035C                 | SHE4          |
| YGL115W                                          | SNF4          | YKR030W                 | GMH1          |

| Predictions at threshold level 0.85 continued... |               |                         |               |
|--------------------------------------------------|---------------|-------------------------|---------------|
| Gene1 of predicted pair                          |               | Gene2 of predicted pair |               |
| Systematic Name                                  | Standard Name | Systematic Name         | Standard Name |
| YIL045W                                          | PIG2          | YLR258W                 | GSY2          |
| YGL033W                                          | HOP2          | YMR016C                 | SOK2          |
| YDR174W                                          | HMO1          | YDR156W                 | RPA14         |
| YNL025C                                          | SSN8          | YNR052C                 | POP2          |
| YDL020C                                          | RPN4          | YLR135W                 | SLX4          |
| YOR327C                                          | SNC2          | YNL051W                 | COG5          |
| YDR176W                                          | NGG1          | YDR448W                 | ADA2          |
| YMR054W                                          | STV1          | YKL080W                 | VMA5          |
| YNL094W                                          | APP1          | YMR109W                 | MYO5          |
| YCR077C                                          | PAT1          | YPR119W                 | CLB2          |
| YDL020C                                          | RPN4          | YPR120C                 | CLB5          |
| YJR060W                                          | CBF1          | YLR182W                 | SWI6          |
| YMR039C                                          | SUB1          | YNL147W                 | LSM7          |
| YKR099W                                          | BAS1          | YKR035W-A               | DID2          |
| YDR174W                                          | HMO1          | YML112W                 | CTK3          |
| YMR095C                                          | SNO1          | YMR142C                 | RPL13B        |
| YDL185W                                          | TFP1          | YGR105W                 | VMA21         |
| YLR447C                                          | VMA6          | YKR001C                 | VPS1          |
| YDR320C                                          | SWA2          | YML001W                 | YPT7          |
| YLR377C                                          | FBP1          | YOL126C                 | MDH2          |
| YBR200W                                          | BEM1          | YJR056C                 | YJR056C       |
| YMR142C                                          | RPL13B        | YKR099W                 | BAS1          |
| YDR479C                                          | PEX29         | YLR324W                 | PEX30         |
| YJL065C                                          | DLS1          | YOR304W                 | ISW2          |
| YGL212W                                          | VAM7          | YAL002W                 | VPS8          |
| YER001W                                          | MNN1          | YGL212W                 | VAM7          |
| YNL243W                                          | SLA2          | YDR358W                 | GGA1          |
| YPL024W                                          | RMI1          | YPL022W                 | RAD1          |
| YJR060W                                          | CBF1          | YLR315W                 | NKP2          |

| Predictions at threshold level 0.85 continued... |               |                         |               |
|--------------------------------------------------|---------------|-------------------------|---------------|
| Gene1 of predicted pair                          |               | Gene2 of predicted pair |               |
| Systematic Name                                  | Standard Name | Systematic Name         | Standard Name |
| YKL117W                                          | SBA1          | YMR273C                 | ZDS1          |
| YNL307C                                          | MCK1          | YNL238W                 | KEX2          |
| YDR448W                                          | ADA2          | YGL066W                 | SGF73         |
| YBR200W                                          | BEM1          | YDL155W                 | CLB3          |
| YML001W                                          | YPT7          | YJR032W                 | CPR7          |
| YJL183W                                          | MNN11         | YML097C                 | VPS9          |
| YER068W                                          | MOT2          | YJL140W                 | RPB4          |
| YKL135C                                          | APL2          | YDL192W                 | ARF1          |
| YAL024C                                          | LTE1          | YDR309C                 | GIC2          |
| YOR195W                                          | SLK19         | YDR379W                 | RGA2          |
| YPR167C                                          | MET16         | YER042W                 | MXR1          |
| YPR131C                                          | NAT3          | YPR046W                 | MCM16         |
| YPR018W                                          | RLF2          | YDR076W                 | RAD55         |
| YGL087C                                          | MMS2          | YDR092W                 | UBC13         |
| YDR507C                                          | GIN4          | YKR020W                 | VPS51         |
| YLR441C                                          | RPS1A         | YHR203C                 | RPS4B         |
| YPL105C                                          | YPL105C       | YDL077C                 | VAM6          |
| YOR270C                                          | VPH1          | YHR039C-A               | VMA10         |
| YML103C                                          | NUP188        | YDR335W                 | MSN5          |
| YLR381W                                          | CTF3          | YAL002W                 | VPS8          |
| YIL156W                                          | UBP7          | YHR114W                 | BZZ1          |
| YJL151C                                          | SNA3          | YHR114W                 | BZZ1          |
| YKR059W                                          | TIF1          | YHR178W                 | STB5          |
| YPR120C                                          | CLB5          | YJL006C                 | CTK2          |
| YER110C                                          | KAP123        | YNL199C                 | GCR2          |
| YIL159W                                          | BNR1          | YHR060W                 | VMA22         |
| YGL212W                                          | VAM7          | YLR093C                 | NYV1          |
| YDR443C                                          | SSN2          | YNR052C                 | POP2          |
| YAL014C                                          | SYN8          | YGL212W                 | VAM7          |

| Predictions at threshold level 0.85 continued... |               |                         |               |
|--------------------------------------------------|---------------|-------------------------|---------------|
| Gene1 of predicted pair                          |               | Gene2 of predicted pair |               |
| Systematic Name                                  | Standard Name | Systematic Name         | Standard Name |
| YNL291C                                          | MID1          | YOR069W                 | VPS5          |
| YNR052C                                          | POP2          | YLR135W                 | SLX4          |
| YDR216W                                          | ADR1          | YPL248C                 | GAL4          |
| YPL115C                                          | BEM3          | YDR310C                 | SUM1          |
| YIL034C                                          | CAP2          | YGL237C                 | HAP2          |
| YMR231W                                          | PEP5          | YGL124C                 | MON1          |
| YBR195C                                          | MSI1          | YML102W                 | CAC2          |
| YLR360W                                          | VPS38         | YGR133W                 | PEX4          |
| YIL159W                                          | BNR1          | YPR119W                 | CLB2          |
| YGR086C                                          | PIL1          | YOL100W                 | PKH2          |
| YKL135C                                          | APL2          | YKR001C                 | VPS1          |
| YEL009C                                          | GCN4          | YCL010C                 | SGF29         |
| YGL212W                                          | VAM7          | YOL018C                 | TLG2          |
| YIL076W                                          | SEC28         | YGR105W                 | VMA21         |
| YHR084W                                          | STE12         | YDR480W                 | DIG2          |
| YNL031C                                          | HHT2          | YKR048C                 | NAP1          |
| YCR063W                                          | BUD31         | YBR065C                 | ECM2          |
| YDL155W                                          | CLB3          | YGL003C                 | CDH1          |
| YNL044W                                          | YIP3          | YNL238W                 | KEX2          |
| YDR443C                                          | SSN2          | YIL038C                 | NOT3          |
| YAL024C                                          | LTE1          | YPL115C                 | BEM3          |
| YDR225W                                          | HTA1          | YGR252W                 | GCN5          |
| YER075C                                          | PTP3          | YDL006W                 | PTC1          |
| YJR090C                                          | GRR1          | YDR028C                 | REG1          |
| YNL215W                                          | IES2          | YBR200W                 | BEM1          |
| YHR039C-A                                        | VMA10         | YEL051W                 | VMA8          |
| YDR225W                                          | HTA1          | YBR009C                 | HHF1          |
| YLR192C                                          | HCR1          | YAL002W                 | VPS8          |
| YJL204C                                          | RCY1          | YJR090C                 | GRR1          |



| Predictions at threshold level 0.85 continued... |               |                         |               |
|--------------------------------------------------|---------------|-------------------------|---------------|
| Gene1 of predicted pair                          |               | Gene2 of predicted pair |               |
| Systematic Name                                  | Standard Name | Systematic Name         | Standard Name |
| YJR060W                                          | CBF1          | YDR207C                 | UME6          |
| YNR023W                                          | SNF12         | YHL025W                 | SNF6          |
| YLR386W                                          | VAC14         | YDR207C                 | UME6          |
| YGL066W                                          | SGF73         | YDR363W-A               | SEM1          |
| YDL020C                                          | RPN4          | YGL124C                 | MON1          |
| YDL020C                                          | RPN4          | YDR363W-A               | SEM1          |
| YIR009W                                          | MSL1          | YPL213W                 | LEA1          |
| YCL001W                                          | RER1          | YAL007C                 | ERP2          |
| YPR072W                                          | NOT5          | YBR010W                 | HHT1          |
| YFR034C                                          | PHO4          | YPL248C                 | GAL4          |
| YIL053W                                          | RHR2          | YIL076W                 | SEC28         |
| YDR192C                                          | NUP42         | YDR335W                 | MSN5          |
| YIL076W                                          | SEC28         | YDL192W                 | ARF1          |
| YMR026C                                          | PEX12         | YDL065C                 | PEX19         |
| YDR245W                                          | MNN10         | YEL036C                 | ANP1          |
| YGR270W                                          | YTA7          | YER161C                 | SPT2          |
| YJL095W                                          | BCK1          | YBR114W                 | RAD16         |
| YLR385C                                          | SWC7          | YNL107W                 | YAF9          |
| YAL031C                                          | GIP4          | YCL027W                 | FUS1          |
| YPL161C                                          | BEM4          | YBR260C                 | RGD1          |
| YKL139W                                          | CTK1          | YDR137W                 | RGP1          |
| YHR171W                                          | ATG7          | YNR007C                 | ATG3          |
| YOR035C                                          | SHE4          | YBL025W                 | RRN10         |
| YGL053W                                          | PRM8          | YAR031W                 | PRM9          |
| YPL129W                                          | TAF14         | YGL151W                 | NUT1          |
| YPL050C                                          | MNN9          | YLR093C                 | NYV1          |
| YBR111W-A                                        | SUS1          | YPL181W                 | CTI6          |
| YLR240W                                          | VPS34         | YBR128C                 | ATG14         |
| YDR507C                                          | GIN4          | YNL166C                 | BNI5          |

| Predictions at threshold level 0.85 continued... |               |                         |               |
|--------------------------------------------------|---------------|-------------------------|---------------|
| Gene1 of predicted pair                          |               | Gene2 of predicted pair |               |
| Systematic Name                                  | Standard Name | Systematic Name         | Standard Name |
| YNL215W                                          | IES2          | YNL107W                 | YAF9          |
| YKR020W                                          | VPS51         | YPR032W                 | SRO7          |
| YDR129C                                          | SAC6          | YBR057C                 | MUM2          |
| YGR063C                                          | SPT4          | YBR089C-A               | NHP6B         |
| YPR051W                                          | MAK3          | YJL004C                 | SYS1          |
| YLR083C                                          | EMP70         | YIL076W                 | SEC28         |
| YBR217W                                          | ATG12         | YMR159C                 | ATG16         |
| YPL024W                                          | RMI1          | YDL154W                 | MSH5          |
| YLR337C                                          | VRP1          | YHL002W                 | HSE1          |
| YCR020C-A                                        | MAK31         | YER120W                 | SCS2          |
| YML071C                                          | COG8          | YPL195W                 | APL5          |
| YJL204C                                          | RCY1          | YGL198W                 | YIP4          |
| YLR441C                                          | RPS1A         | YPL137C                 | GIP3          |
| YLR399C                                          | BDF1          | YGR252W                 | GCN5          |
| YLR381W                                          | CTF3          | YPL018W                 | CTF19         |
| YLR447C                                          | VMA6          | YJR135C                 | MCM22         |
| YCL037C                                          | SRO9          | YEL043W                 | YEL043W       |
| YPR052C                                          | NHP6A         | YGL071W                 | AFT1          |
| YOR327C                                          | SNC2          | YDL192W                 | ARF1          |
| YKR101W                                          | SIR1          | YML109W                 | ZDS2          |
| YML103C                                          | NUP188        | YER110C                 | KAP123        |
| YMR224C                                          | MRE11         | YLR313C                 | SPH1          |
| YOR001W                                          | RRP6          | YHR167W                 | THP2          |
| YJR060W                                          | CBF1          | YJR035W                 | RAD26         |
| YCL032W                                          | STE50         | YMR139W                 | RIM11         |
| YGR104C                                          | SRB5          | YLR357W                 | RSC2          |
| YNR072W                                          | HXT17         | YLR398C                 | SKI2          |
| YPL195W                                          | APL5          | YJR084W                 | CSN12         |
| YBR041W                                          | FAT1          | YKL140W                 | TGL1          |

| Predictions at threshold level 0.85 continued... |               |                         |               |
|--------------------------------------------------|---------------|-------------------------|---------------|
| Gene1 of predicted pair                          |               | Gene2 of predicted pair |               |
| Systematic Name                                  | Standard Name | Systematic Name         | Standard Name |
| YBL078C                                          | ATG8          | YLR093C                 | NYV1          |
| YDL020C                                          | RPN4          | YHR013C                 | ARD1          |
| YOR290C                                          | SNF2          | YBR289W                 | SNF5          |
| YDR202C                                          | RAV2          | YGR020C                 | VMA7          |
| YNL025C                                          | SSN8          | YPL042C                 | SSN3          |
| YML019W                                          | OST6          | YEL036C                 | ANP1          |
| YPL045W                                          | VPS16         | YGL095C                 | VPS45         |
| YJL124C                                          | LSM1          | YOR124C                 | UBP2          |
| YOR038C                                          | HIR2          | YEL056W                 | HAT2          |
| YJL084C                                          | ALY2          | YIL050W                 | PCL7          |
| YDR129C                                          | SAC6          | YOR035C                 | SHE4          |
| YJR056C                                          | YJR056C       | YPL161C                 | BEM4          |
| YER161C                                          | SPT2          | YBR010W                 | HHT1          |
| YKL032C                                          | IXR1          | YDR378C                 | LSM6          |
| YMR261C                                          | TPS3          | YFL033C                 | RIM15         |
| YHL031C                                          | GOS1          | YBR131W                 | CCZ1          |
| YOR140W                                          | SFL1          | YPL203W                 | TPK2          |
| YOR231W                                          | MKK1          | YJL095W                 | BCK1          |
| YJL157C                                          | FAR1          | YJR086W                 | STE18         |
| YPR072W                                          | NOT5          | YPL248C                 | GAL4          |
| YOR191W                                          | RIS1          | YNL106C                 | INP52         |
| YAR014C                                          | BUD14         | YOL108C                 | INO4          |
| YJL029C                                          | VPS53         | YLR396C                 | VPS33         |
| YHL031C                                          | GOS1          | YOR106W                 | VAM3          |
| YDL116W                                          | NUP84         | YDR192C                 | NUP42         |
| YML097C                                          | VPS9          | YLR398C                 | SKI2          |
| YOL090W                                          | MSH2          | YNL082W                 | PMS1          |
| YMR127C                                          | SAS2          | YNL107W                 | YAF9          |
| YLR447C                                          | VMA6          | YKL119C                 | VPH2          |

| Predictions at threshold level 0.85 continued... |               |                         |               |
|--------------------------------------------------|---------------|-------------------------|---------------|
| Gene1 of predicted pair                          |               | Gene2 of predicted pair |               |
| Systematic Name                                  | Standard Name | Systematic Name         | Standard Name |
| YJL036W                                          | SNX4          | YGL054C                 | ERV14         |
| YPL115C                                          | BEM3          | YDL020C                 | RPN4          |
| YNL291C                                          | MID1          | YPL018W                 | CTF19         |
| YGR159C                                          | NSR1          | YHR052W                 | CIC1          |
| YMR198W                                          | CIK1          | YJL058C                 | BIT61         |
| YGR072W                                          | UPF3          | YOR243C                 | PUS7          |
| YFR031C-A                                        | RPL2A         | YKR099W                 | BAS1          |
| YOR327C                                          | SNC2          | YEL036C                 | ANP1          |
| YHR134W                                          | WSS1          | YJL095W                 | BCK1          |
| YGL043W                                          | DST1          | YBR089C-A               | NHP6B         |
| YLR248W                                          | RCK2          | YDL047W                 | SIT4          |
| YER180C-A                                        | SLO1          | YPL051W                 | ARL3          |
| YCR077C                                          | PAT1          | YOR124C                 | UBP2          |
| YPL234C                                          | TFP3          | YKL080W                 | VMA5          |
| YMR068W                                          | AVO2          | YNL047C                 | SLM2          |
| YLL039C                                          | UBI4          | YML115C                 | VAN1          |
| YPR018W                                          | RLF2          | YLR399C                 | BDF1          |
| YHR134W                                          | WSS1          | YML016C                 | PPZ1          |
| YOR109W                                          | INP53         | YPR173C                 | VPS4          |
| YDL099W                                          | BUG1          | YKL050C                 | YKL050C       |
| YMR055C                                          | BUB2          | YLR254C                 | NDL1          |
| YPR036W                                          | VMA13         | YLR447C                 | VMA6          |
| YDR383C                                          | NKP1          | YPL018W                 | CTF19         |
| YGL033W                                          | HOP2          | YER116C                 | SLX8          |
| YDR385W                                          | EFT2          | YDR358W                 | GGA1          |
| YBR200W                                          | BEM1          | YDL159W                 | STE7          |
| YBR107C                                          | IML3          | YPL106C                 | SSE1          |
| YDR456W                                          | NHX1          | YEL036C                 | ANP1          |
| YCR002C                                          | CDC10         | YNL166C                 | BNI5          |

| Predictions at threshold level 0.85 continued... |               |                         |               |
|--------------------------------------------------|---------------|-------------------------|---------------|
| Gene1 of predicted pair                          |               | Gene2 of predicted pair |               |
| Systematic Name                                  | Standard Name | Systematic Name         | Standard Name |
| YLR093C                                          | NYV1          | YDL192W                 | ARF1          |
| YKL129C                                          | MYO3          | YMR032W                 | HOF1          |
| YGL133W                                          | ITC1          | YJL065C                 | DLS1          |
| YLR191W                                          | PEX13         | YGL153W                 | PEX14         |
| YOR195W                                          | SLK19         | YMR199W                 | CLN1          |
| YBR009C                                          | HHF1          | YNL107W                 | YAF9          |
| YNL243W                                          | SLA2          | YER122C                 | GLO3          |
| YGR072W                                          | UPF3          | YNL069C                 | RPL16B        |
| YGL066W                                          | SGF73         | YPR119W                 | CLB2          |
| YOR033C                                          | EXO1          | YML095C                 | RAD10         |
| YNL025C                                          | SSN8          | YOR140W                 | SFL1          |
| YDR142C                                          | PEX7          | YGR077C                 | PEX8          |
| YNL297C                                          | MON2          | YOL018C                 | TLG2          |
| YDL116W                                          | NUP84         | YGL016W                 | KAP122        |
| YAL016W                                          | TPD3          | YPL152W                 | RRD2          |
| YBR200W                                          | BEM1          | YDL083C                 | RPS16B        |
| YJL137C                                          | GLG2          | YLR258W                 | GSY2          |
| YJR135C                                          | MCM22         | YPL018W                 | CTF19         |
| YGR261C                                          | APL6          | YKR001C                 | VPS1          |
| YDR383C                                          | NKP1          | YDR254W                 | CHL4          |
| YPL129W                                          | TAF14         | YOR290C                 | SNF2          |
| YDL042C                                          | SIR2          | YNL030W                 | HHF2          |
| YAL056W                                          | GPB2          | YGL121C                 | GPG1          |
| YDL232W                                          | OST4          | YML019W                 | OST6          |
| YGL071W                                          | AFT1          | YBR112C                 | CYC8          |
| YHR156C                                          | LIN1          | YIL076W                 | SEC28         |
| YOR106W                                          | VAM3          | YPL045W                 | VPS16         |
| YHR052W                                          | CIC1          | YJL190C                 | RPS22A        |
| YMR080C                                          | NAM7          | YKL068W                 | NUP100        |

| Predictions at threshold level 0.85 continued... |               |                         |               |
|--------------------------------------------------|---------------|-------------------------|---------------|
| Gene1 of predicted pair                          |               | Gene2 of predicted pair |               |
| Systematic Name                                  | Standard Name | Systematic Name         | Standard Name |
| YOR080W                                          | DIA2          | YLR429W                 | CRN1          |
| YOR080W                                          | DIA2          | YDL155W                 | CLB3          |
| YDL232W                                          | OST4          | YGL226C-A               | OST5          |
| YOR191W                                          | RIS1          | YHR134W                 | WSS1          |
| YBR131W                                          | CCZ1          | YGL124C                 | MON1          |
| YGL003C                                          | CDH1          | YDL192W                 | ARF1          |
| YGL158W                                          | RCK1          | YNL065W                 | AQR1          |
| YMR116C                                          | ASC1          | YDR378C                 | LSM6          |
| YLR386W                                          | VAC14         | YDR144C                 | MKC7          |
| YOL145C                                          | CTR9          | YOL051W                 | GAL11         |
| YLR079W                                          | SIC1          | YML016C                 | PPZ1          |
| YHR160C                                          | PEX18         | YDR244W                 | PEX5          |
| YPL112C                                          | PEX25         | YMR204C                 | INP1          |
| YBR010W                                          | HHT1          | YPL248C                 | GAL4          |
| YBR260C                                          | RGD1          | YMR032W                 | HOF1          |
| YDL160C                                          | DHH1          | YPR119W                 | CLB2          |
| YLR234W                                          | TOP3          | YGL175C                 | SAE2          |
| YEL027W                                          | CUP5          | YKL080W                 | VMA5          |
| YGR275W                                          | RTT102        | YNL041C                 | COG6          |
| YLR006C                                          | SSK1          | YDR309C                 | GIC2          |
| YDR245W                                          | MNN10         | YJL095W                 | BCK1          |
| YPL042C                                          | SSN3          | YDL155W                 | CLB3          |
| YPL042C                                          | SSN3          | YBR200W                 | BEM1          |
| YOR344C                                          | TYE7          | YOL108C                 | INO4          |
| YLR386W                                          | VAC14         | YDR363W-A               | SEM1          |
| YBR131W                                          | CCZ1          | YLR396C                 | VPS33         |
| YDR448W                                          | ADA2          | YLR176C                 | RFX1          |
| YDR097C                                          | MSH6          | YNL082W                 | PMS1          |
| YML115C                                          | VAN1          | YOR080W                 | DIA2          |

| Predictions at threshold level 0.85 continued... |               |                         |               |
|--------------------------------------------------|---------------|-------------------------|---------------|
| Gene1 of predicted pair                          |               | Gene2 of predicted pair |               |
| Systematic Name                                  | Standard Name | Systematic Name         | Standard Name |
| YDL155W                                          | CLB3          | YDL226C                 | GCS1          |
| YLR386W                                          | VAC14         | YLR320W                 | MMS22         |
| YBR217W                                          | ATG12         | YJL183W                 | MNN11         |
| YMR224C                                          | MRE11         | YOR035C                 | SHE4          |
| YLR337C                                          | VRP1          | YMR109W                 | MYO5          |
| YLR265C                                          | NEJ1          | YGL090W                 | LIF1          |
| YPL129W                                          | TAF14         | YCR084C                 | TUP1          |
| YDR153C                                          | ENT5          | YAL002W                 | VPS8          |
| YGR105W                                          | VMA21         | YER072W                 | VTC1          |
| YOR076C                                          | SKI7          | YLR135W                 | SLX4          |
| YBR200W                                          | BEM1          | YLR452C                 | SST2          |
| YBR289W                                          | SNF5          | YDR073W                 | SNF11         |
| YPR018W                                          | RLF2          | YDR225W                 | HTA1          |
| YOR195W                                          | SLK19         | YDR507C                 | GIN4          |
| YKR101W                                          | SIR1          | YDR310C                 | SUM1          |
| YGR241C                                          | YAP1802       | YDR129C                 | SAC6          |
| YGL249W                                          | ZIP2          | YLR394W                 | CST9          |
| YGL134W                                          | PCL10         | YER059W                 | PCL6          |
| YBR200W                                          | BEM1          | YDR335W                 | MSN5          |
| YHR160C                                          | PEX18         | YIL160C                 | POT1          |
| YOR270C                                          | VPH1          | YEL051W                 | VMA8          |
| YDR378C                                          | LSM6          | YER161C                 | SPT2          |
| YPR084W                                          | YPR084W       | YPL120W                 | VPS30         |
| YJL210W                                          | PEX2          | YDR265W                 | PEX10         |
| YLR079W                                          | SIC1          | YJL157C                 | FAR1          |
| YNL068C                                          | FKH2          | YPL256C                 | CLN2          |
| YOL031C                                          | SIL1          | YMR214W                 | SCJ1          |
| YLR360W                                          | VPS38         | YDR108W                 | GSG1          |
| YMR255W                                          | GFD1          | YMR273C                 | ZDS1          |

| Predictions at threshold level 0.85 continued... |               |                         |               |
|--------------------------------------------------|---------------|-------------------------|---------------|
| Gene1 of predicted pair                          |               | Gene2 of predicted pair |               |
| Systematic Name                                  | Standard Name | Systematic Name         | Standard Name |
| YCL032W                                          | STE50         | YHR061C                 | GIC1          |
| YOR035C                                          | SHE4          | YMR311C                 | GLC8          |
| YNL094W                                          | APP1          | YBR108W                 | YBR108W       |
| YLR192C                                          | HCR1          | YDL083C                 | RPS16B        |
| YDL047W                                          | SIT4          | YDL226C                 | GCS1          |
| YDR137W                                          | RGP1          | YKR099W                 | BAS1          |
| YHR205W                                          | SCH9          | YPL240C                 | HSP82         |
| YPR018W                                          | RLF2          | YOR213C                 | SAS5          |
| YHR084W                                          | STE12         | YPR119W                 | CLB2          |
| YDL042C                                          | SIR2          | YBR010W                 | HHT1          |
| YKL139W                                          | CTK1          | YJL140W                 | RPB4          |
| YIL162W                                          | SUC2          | YBR283C                 | SSH1          |
| YKL213C                                          | DOA1          | YJL095W                 | BCK1          |
| YJL004C                                          | SYS1          | YAR014C                 | BUD14         |
| YDL192W                                          | ARF1          | YJR033C                 | RAV1          |
| YGR080W                                          | TWF1          | YLR429W                 | CRN1          |
| YLR093C                                          | NYV1          | YGL124C                 | MON1          |
| YOR270C                                          | VPH1          | YGR105W                 | VMA21         |
| YIR003W                                          | YIR003W       | YJL095W                 | BCK1          |
| YNL243W                                          | SLA2          | YJR075W                 | HOC1          |
| YIL076W                                          | SEC28         | YLR093C                 | NYV1          |
| YDR153C                                          | ENT5          | YNR006W                 | VPS27         |
| YDL155W                                          | CLB3          | YPL256C                 | CLN2          |
| YDR146C                                          | SWI5          | YNL079C                 | TPM1          |
| YDR174W                                          | HMO1          | YJR063W                 | RPA12         |
| YGR184C                                          | UBR1          | YPL177C                 | CUP9          |
| YLR135W                                          | SLX4          | YOR243C                 | PUS7          |
| YDR174W                                          | HMO1          | YIL036W                 | CST6          |
| YEL009C                                          | GCN4          | YNR023W                 | SNF12         |



| Predictions at threshold level 0.85 continued... |               |                         |               |
|--------------------------------------------------|---------------|-------------------------|---------------|
| Gene1 of predicted pair                          |               | Gene2 of predicted pair |               |
| Systematic Name                                  | Standard Name | Systematic Name         | Standard Name |
| YPL042C                                          | SSN3          | YML016C                 | PPZ1          |
| YBR200W                                          | BEM1          | YBL016W                 | FUS3          |
| YJL053W                                          | PEP8          | YGR105W                 | VMA21         |
| YKR020W                                          | VPS51         | YDL047W                 | SIT4          |
| YBR107C                                          | IML3          | YGL151W                 | NUT1          |
| YFL023W                                          | BUD27         | YLR441C                 | RPS1A         |
| YKL129C                                          | MYO3          | YOR247W                 | SRL1          |
| YPL024W                                          | RMI1          | YPR119W                 | CLB2          |
| YBR108W                                          | YBR108W       | YHR016C                 | YSC84         |
| YNR049C                                          | MSO1          | YAL030W                 | SNC1          |
| YDR174W                                          | HMO1          | YLR079W                 | SIC1          |
| YDL047W                                          | SIT4          | YNL107W                 | YAF9          |
| YDR225W                                          | HTA1          | YLR150W                 | STM1          |
| YEL009C                                          | GCN4          | YGR104C                 | SRB5          |
| YLR216C                                          | CPR6          | YBR057C                 | MUM2          |
| YLR148W                                          | PEP3          | YGL095C                 | VPS45         |
| YJL176C                                          | SWI3          | YNR023W                 | SNF12         |
| YPL240C                                          | HSP82         | YOR180C                 | DCI1          |
| YLR093C                                          | NYV1          | YML028W                 | TSA1          |
| YLR150W                                          | STM1          | YOR014W                 | RTS1          |
| YKR020W                                          | VPS51         | YDL155W                 | CLB3          |
| YLR337C                                          | VRP1          | YKL129C                 | MYO3          |
| YDL116W                                          | NUP84         | YOR141C                 | ARP8          |
| YKL034W                                          | TUL1          | YBR082C                 | UBC4          |
| YGR104C                                          | SRB5          | YPL248C                 | GAL4          |
| YLR381W                                          | CTF3          | YDR254W                 | CHL4          |
| YNL297C                                          | MON2          | YLR309C                 | IMH1          |
| YPL042C                                          | SSN3          | YPL129W                 | TAF14         |
| YGL066W                                          | SGF73         | YBR173C                 | UMP1          |

| Predictions at threshold level 0.85 continued... |               |                         |               |
|--------------------------------------------------|---------------|-------------------------|---------------|
| Gene1 of predicted pair                          |               | Gene2 of predicted pair |               |
| Systematic Name                                  | Standard Name | Systematic Name         | Standard Name |
| YDL127W                                          | PCL2          | YKR001C                 | VPS1          |
| YDL065C                                          | PEX19         | YLR043C                 | TRX1          |
| YNL087W                                          | TCB2          | YGL003C                 | CDH1          |
| YOR096W                                          | RPS7A         | YBL071W-A               | KTI11         |
| YDR179C                                          | CSN9          | YOL117W                 | RRI2          |
| YGR261C                                          | APL6          | YML001W                 | YPT7          |
| YKL048C                                          | ELM1          | YOR141C                 | ARP8          |
| YDR155C                                          | CPR1          | YDR310C                 | SUM1          |
| YDR329C                                          | PEX3          | YNL214W                 | PEX17         |
| YOR127W                                          | RGA1          | YJL187C                 | SWE1          |
| YDR261C                                          | EXG2          | YLR398C                 | SKI2          |
| YNL236W                                          | SIN4          | YPL248C                 | GAL4          |
| YDR244W                                          | PEX5          | YDR265W                 | PEX10         |
| YDR137W                                          | RGP1          | YPL137C                 | GIP3          |
| YMR198W                                          | CIK1          | YBR107C                 | IML3          |
| YDR080W                                          | VPS41         | YJL004C                 | SYS1          |
| YDR129C                                          | SAC6          | YJL095W                 | BCK1          |
| YMR198W                                          | CIK1          | YDL226C                 | GCS1          |
| YGR040W                                          | KSS1          | YDL159W                 | STE7          |
| YKR059W                                          | TIF1          | YOR368W                 | RAD17         |
| YBL008W                                          | HIR1          | YBR215W                 | HPC2          |
| YGL223C                                          | COG1          | YOL018C                 | TLG2          |
| YOR270C                                          | VPH1          | YPR036W                 | VMA13         |
| YPL042C                                          | SSN3          | YBR089C-A               | NHP6B         |
| YPL220W                                          | RPL1A         | YNL147W                 | LSM7          |
| YBR239C                                          | YBR239C       | YLR144C                 | ACF2          |
| YNL044W                                          | YIP3          | YGL198W                 | YIP4          |
| YOR195W                                          | SLK19         | YLR102C                 | APC9          |
| YBR217W                                          | ATG12         | YBL078C                 | ATG8          |

| Predictions at threshold level 0.85 continued... |               |                         |               |
|--------------------------------------------------|---------------|-------------------------|---------------|
| Gene1 of predicted pair                          |               | Gene2 of predicted pair |               |
| Systematic Name                                  | Standard Name | Systematic Name         | Standard Name |
| YOL147C                                          | PEX11         | YPR119W                 | CLB2          |
| YGR020C                                          | VMA7          | YPL234C                 | TFP3          |
| YLR399C                                          | BDF1          | YBR009C                 | HHF1          |
| YHL031C                                          | GOS1          | YOL018C                 | TLG2          |
| YEL009C                                          | GCN4          | YLR357W                 | RSC2          |
| YJL183W                                          | MNN11         | YAL002W                 | VPS8          |
| YGR238C                                          | KEL2          | YHR158C                 | KEL1          |
| YCL037C                                          | SRO9          | YJL187C                 | SWE1          |
| YBR119W                                          | MUD1          | YKL074C                 | MUD2          |
| YLR191W                                          | PEX13         | YML035C                 | AMD1          |
| YDR448W                                          | ADA2          | YFL031W                 | HAC1          |
| YDR329C                                          | PEX3          | YMR026C                 | PEX12         |
| YOL067C                                          | RTG1          | YOL108C                 | INO4          |
| YER110C                                          | KAP123        | YBR017C                 | KAP104        |
| YOR032C                                          | HMS1          | YNL289W                 | PCL1          |
| YOL051W                                          | GAL11         | YGL151W                 | NUT1          |
| YGL190C                                          | CDC55         | YMR048W                 | CSM3          |
| YGR104C                                          | SRB5          | YGL025C                 | PGD1          |
| YPL129W                                          | TAF14         | YPL248C                 | GAL4          |
| YBL016W                                          | FUS3          | YPL256C                 | CLN2          |
| YFR034C                                          | PHO4          | YGR233C                 | PHO81         |
| YDL020C                                          | RPN4          | YJL095W                 | BCK1          |
| YBR200W                                          | BEM1          | YKR048C                 | NAP1          |
| YDR245W                                          | MNN10         | YPL050C                 | MNN9          |
| YML016C                                          | PPZ1          | YBR119W                 | MUD1          |
| YNL106C                                          | INP52         | YDR358W                 | GGA1          |
| YGL033W                                          | HOP2          | YNL087W                 | TCB2          |
| YIL076W                                          | SEC28         | YBR030W                 | YBR030W       |
| YHR149C                                          | SKG6          | YML109W                 | ZDS2          |

| Predictions at threshold level 0.85 continued... |               |                         |               |
|--------------------------------------------------|---------------|-------------------------|---------------|
| Gene1 of predicted pair                          |               | Gene2 of predicted pair |               |
| Systematic Name                                  | Standard Name | Systematic Name         | Standard Name |
| YBR107C                                          | IML3          | YPL161C                 | BEM4          |
| YIL159W                                          | BNR1          | YBL103C                 | RTG3          |
| YIL148W                                          | RPL40A        | YKL068W                 | NUP100        |
| YPR189W                                          | SKI3          | YNR052C                 | POP2          |
| YDR202C                                          | RAV2          | YBR127C                 | VMA2          |
| YIL034C                                          | CAP2          | YCR086W                 | CSM1          |
| YGR252W                                          | GCN5          | YFL031W                 | HAC1          |
| YML103C                                          | NUP188        | YBL079W                 | NUP170        |
| YBL008W                                          | HIR1          | YJR140C                 | HIR3          |
| YBR273C                                          | UBX7          | YKL213C                 | DOA1          |
| YAL024C                                          | LTE1          | YOR127W                 | RGA1          |
| YLR399C                                          | BDF1          | YLR357W                 | RSC2          |
| YOR127W                                          | RGA1          | YPL161C                 | BEM4          |
| YPL180W                                          | TCO89         | YER118C                 | SHO1          |
| YPR036W                                          | VMA13         | YEL027W                 | CUP5          |
| YGR104C                                          | SRB5          | YBR112C                 | CYC8          |
| YOR332W                                          | VMA4          | YEL027W                 | CUP5          |
| YPL049C                                          | DIG1          | YBL016W                 | FUS3          |
| YGL212W                                          | VAM7          | YGL124C                 | MON1          |
| YFL023W                                          | BUD27         | YDR137W                 | RGP1          |
| YMR042W                                          | ARG80         | YJR094C                 | IME1          |
| YJL058C                                          | BIT61         | YDL226C                 | GCS1          |
| YFR031C-A                                        | RPL2A         | YOL108C                 | INO4          |
| YLR386W                                          | VAC14         | YHR111W                 | UBA4          |
| YER016W                                          | BIM1          | YER105C                 | NUP157        |
| YOR001W                                          | RRP6          | YJR060W                 | CBF1          |
| YHR119W                                          | SET1          | YLR418C                 | CDC73         |
| YDR490C                                          | PKH1          | YMR104C                 | YPK2          |
| YJR058C                                          | APS2          | YJR005W                 | APL1          |

| Predictions at threshold level 0.85 continued... |               |                         |               |
|--------------------------------------------------|---------------|-------------------------|---------------|
| Gene1 of predicted pair                          |               | Gene2 of predicted pair |               |
| Systematic Name                                  | Standard Name | Systematic Name         | Standard Name |
| YCR066W                                          | RAD18         | YPR032W                 | SRO7          |
| YJL089W                                          | SIP4          | YDR477W                 | SNF1          |
| YGR072W                                          | UPF3          | YER120W                 | SCS2          |
| YDR092W                                          | UBC13         | YCR066W                 | RAD18         |
| YBR041W                                          | FAT1          | YOR059C                 | YOR059C       |
| YOL082W                                          | ATG19         | YGL156W                 | AMS1          |
| YMR153W                                          | NUP53         | YPL178W                 | CBC2          |
| YDR004W                                          | RAD57         | YBR107C                 | IML3          |
| YPL024W                                          | RMI1          | YGL175C                 | SAE2          |
| YAL024C                                          | LTE1          | YDR379W                 | RGA2          |
| YLR288C                                          | MEC3          | YHR152W                 | SPO12         |
| YIL076W                                          | SEC28         | YLR386W                 | VAC14         |
| YOR033C                                          | EXO1          | YPL022W                 | RAD1          |
| YLR360W                                          | VPS38         | YJR040W                 | GEF1          |
| YLR006C                                          | SSK1          | YPL256C                 | CLN2          |
| YDR176W                                          | NGG1          | YLR399C                 | BDF1          |
| YFR021W                                          | ATG18         | YDL149W                 | ATG9          |
| YDL020C                                          | RPN4          | YMR179W                 | SPT21         |
| YCR088W                                          | ABP1          | YDL226C                 | GCS1          |
| YGL178W                                          | MPT5          | YER167W                 | BCK2          |
| YMR284W                                          | YKU70         | YKL114C                 | APN1          |
| YKR014C                                          | YPT52         | YJL095W                 | BCK1          |
| YDL113C                                          | ATG20         | YPR049C                 | ATG11         |
| YGL161C                                          | YIP5          | YOR308C                 | SNU66         |
| YJL110C                                          | GZF3          | YKR034W                 | DAL80         |
| YIL156W                                          | UBP7          | YHL002W                 | HSE1          |
| YDR004W                                          | RAD57         | YDL059C                 | RAD59         |
| YGR241C                                          | YAP1802       | YJR125C                 | ENT3          |
| YDR484W                                          | VPS52         | YJL183W                 | MNN11         |

| Predictions at threshold level 0.85 continued... |               |                         |               |
|--------------------------------------------------|---------------|-------------------------|---------------|
| Gene1 of predicted pair                          |               | Gene2 of predicted pair |               |
| Systematic Name                                  | Standard Name | Systematic Name         | Standard Name |
| YDR359C                                          | EAF1          | YGL190C                 | CDC55         |
| YNL238W                                          | KEX2          | YKR030W                 | GMH1          |
| YBL088C                                          | TEL1          | YJR021C                 | REC107        |
| YIL076W                                          | SEC28         | YLR398C                 | SKI2          |
| YPL090C                                          | RPS6A         | YGL246C                 | RAI1          |
| YPL022W                                          | RAD1          | YBR073W                 | RDH54         |
| YNL032W                                          | SIW14         | YDR137W                 | RGP1          |
| YMR224C                                          | MRE11         | YDR318W                 | MCM21         |
| YLR234W                                          | TOP3          | YGL237C                 | HAP2          |
| YOR127W                                          | RGA1          | YDR183W                 | PLP1          |
| YML001W                                          | YPT7          | YPR028W                 | YOP1          |
| YDL116W                                          | NUP84         | YLR018C                 | POM34         |
| YJR060W                                          | CBF1          | YGL252C                 | RTG2          |
| YNL069C                                          | RPL16B        | YNL238W                 | KEX2          |
| YOL051W                                          | GAL11         | YJL140W                 | RPB4          |
| YNL032W                                          | SIW14         | YOL111C                 | MDY2          |
| YBR215W                                          | HPC2          | YOR308C                 | SNU66         |
| YMR116C                                          | ASC1          | YHR013C                 | ARD1          |
| YGR241C                                          | YAP1802       | YHR161C                 | YAP1801       |
| YGL223C                                          | COG1          | YCL001W                 | RER1          |
| YHR134W                                          | WSS1          | YMR116C                 | ASC1          |
| YOR069W                                          | VPS5          | YNL238W                 | KEX2          |
| YER044C-A                                        | MEI4          | YJR021C                 | REC107        |
| YML095C                                          | RAD10         | YJL183W                 | MNN11         |
| YKL048C                                          | ELM1          | YDL155W                 | CLB3          |
| YGR239C                                          | PEX21         | YDR244W                 | PEX5          |
| YNL094W                                          | APP1          | YPL246C                 | RBD2          |
| YPR018W                                          | RLF2          | YMR224C                 | MRE11         |
| YLR320W                                          | MMS22         | YLR398C                 | SKI2          |

| Predictions at threshold level 0.85 continued... |               |                         |               |
|--------------------------------------------------|---------------|-------------------------|---------------|
| Gene1 of predicted pair                          |               | Gene2 of predicted pair |               |
| Systematic Name                                  | Standard Name | Systematic Name         | Standard Name |
| YBR065C                                          | ECM2          | YJR050W                 | ISY1          |
| YJR135C                                          | MCM22         | YGL124C                 | MON1          |
| YKL048C                                          | ELM1          | YPR119W                 | CLB2          |
| YML109W                                          | ZDS2          | YBR010W                 | HHT1          |
| YDR318W                                          | MCM21         | YKL114C                 | APN1          |
| YMR055C                                          | BUB2          | YPL018W                 | CTF19         |
| YNR072W                                          | HXT17         | YHR039C-A               | VMA10         |
| YBR041W                                          | FAT1          | YPR119W                 | CLB2          |
| YPL001W                                          | HAT1          | YOR038C                 | HIR2          |
| YGR072W                                          | UPF3          | YML001W                 | YPT7          |
| YPL024W                                          | RMI1          | YER161C                 | SPT2          |
| YJL176C                                          | SWI3          | YDR073W                 | SNF11         |
| YNR052C                                          | POP2          | YOL090W                 | MSH2          |
| YMR224C                                          | MRE11         | YOR327C                 | SNC2          |
| YDR028C                                          | REG1          | YDL229W                 | SSB1          |
| YDR479C                                          | PEX29         | YMR204C                 | INP1          |
| YOR332W                                          | VMA4          | YPR036W                 | VMA13         |
| YNL166C                                          | BNI5          | YKL048C                 | ELM1          |
| YNL307C                                          | MCK1          | YHR111W                 | UBA4          |
| YNL025C                                          | SSN8          | YCR084C                 | TUP1          |
| YDR363W-A                                        | SEM1          | YIR005W                 | IST3          |
| YDL226C                                          | GCS1          | YPR119W                 | CLB2          |
| YKR035W-A                                        | DID2          | YDR486C                 | VPS60         |
| YLR216C                                          | CPR6          | YOL054W                 | PSH1          |
| YJR035W                                          | RAD26         | YKL114C                 | APN1          |
| YDL005C                                          | MED2          | YNL107W                 | YAF9          |
| YDR142C                                          | PEX7          | YIL160C                 | POT1          |
| YLR433C                                          | CNA1          | YDR184C                 | ATC1          |
| YGR020C                                          | VMA7          | YGR105W                 | VMA21         |

| Predictions at threshold level 0.85 continued... |               |                         |               |
|--------------------------------------------------|---------------|-------------------------|---------------|
| Gene1 of predicted pair                          |               | Gene2 of predicted pair |               |
| Systematic Name                                  | Standard Name | Systematic Name         | Standard Name |
| YHR079C                                          | IRE1          | YOL148C                 | SPT20         |
| YOR127W                                          | RGA1          | YDR264C                 | AKR1          |
| YKR057W                                          | RPS21A        | YBL047C                 | EDE1          |
| YLR119W                                          | SRN2          | YLR180W                 | SAM1          |
| YDR507C                                          | GIN4          | YLL054C                 | YLL054C       |
| YIL159W                                          | BNR1          | YOL081W                 | IRA2          |
| YNL238W                                          | KEX2          | YDL077C                 | VAM6          |
| YEL009C                                          | GCN4          | YDR073W                 | SNF11         |
| YLR079W                                          | SIC1          | YPL256C                 | CLN2          |
| YPR135W                                          | CTF4          | YHR056C                 | RSC30         |
| YEL009C                                          | GCN4          | YDR216W                 | ADR1          |
| YBR111W-A                                        | SUS1          | YGL252C                 | RTG2          |
| YML016C                                          | PPZ1          | YJR063W                 | RPA12         |
| YDL020C                                          | RPN4          | YPR131C                 | NAT3          |
| YDL013W                                          | SLX5          | YLR032W                 | RAD5          |
| YJL149W                                          | YJL149W       | YJL204C                 | RCY1          |
| YLR447C                                          | VMA6          | YJR033C                 | RAV1          |
| YNL253W                                          | TEX1          | YML062C                 | MFT1          |
| YKL139W                                          | CTK1          | YBR020W                 | GAL1          |
| YJL124C                                          | LSM1          | YAL002W                 | VPS8          |
| YLR399C                                          | BDF1          | YDR378C                 | LSM6          |
| YNR032C-A                                        | HUB1          | YDL223C                 | HBT1          |
| YOR195W                                          | SLK19         | YOR014W                 | RTS1          |
| YDR146C                                          | SWI5          | YHR158C                 | KEL1          |
| YGL200C                                          | EMP24         | YLR093C                 | NYV1          |
| YGL223C                                          | COG1          | YNL293W                 | MSB3          |
| YGL025C                                          | PGD1          | YCR084C                 | TUP1          |
| YCR065W                                          | HCM1          | YJL058C                 | BIT61         |
| YLR079W                                          | SIC1          | YOR014W                 | RTS1          |



| Predictions at threshold level 0.85 continued... |               |                         |               |
|--------------------------------------------------|---------------|-------------------------|---------------|
| Gene1 of predicted pair                          |               | Gene2 of predicted pair |               |
| Systematic Name                                  | Standard Name | Systematic Name         | Standard Name |
| YJR031C                                          | GEA1          | YKR030W                 | GMH1          |
| YOR106W                                          | VAM3          | YEL013W                 | VAC8          |
| YPL045W                                          | VPS16         | YOR036W                 | PEP12         |
| YNL139C                                          | RLR1          | YNL253W                 | TEX1          |
| YCL067C                                          | HMLALPHA2     | YCL066W                 | HMLALPHA1     |
| YOR231W                                          | MKK1          | YER089C                 | PTC2          |
| YOR076C                                          | SKI7          | YGL213C                 | SKI8          |
| YDR363W-A                                        | SEM1          | YDR254W                 | CHL4          |
| YLR386W                                          | VAC14         | YBR108W                 | YBR108W       |
| YGL237C                                          | HAP2          | YOR358W                 | HAP5          |
| YBR200W                                          | BEM1          | YER049W                 | TPA1          |
| YOR033C                                          | EXO1          | YMR284W                 | YKU70         |
| YDL020C                                          | RPN4          | YGR184C                 | UBR1          |
| YIL034C                                          | CAP2          | YML016C                 | PPZ1          |
| YDR080W                                          | VPS41         | YPL045W                 | VPS16         |
| YJR140C                                          | HIR3          | YKL213C                 | DOA1          |
| YNL076W                                          | MKS1          | YER040W                 | GLN3          |
| YBL058W                                          | SHP1          | YGL033W                 | HOP2          |
| YER143W                                          | DDI1          | YJL164C                 | TPK1          |
| YNL307C                                          | MCK1          | YKL110C                 | KTI12         |
| YLR093C                                          | NYV1          | YOR036W                 | PEP12         |
| YGL212W                                          | VAM7          | YJL183W                 | MNN11         |
| YBL008W                                          | HIR1          | YOR141C                 | ARP8          |
| YLR396C                                          | VPS33         | YML001W                 | YPT7          |
| YBR228W                                          | SLX1          | YOL030W                 | GAS5          |
| YGL033W                                          | HOP2          | YCR053W                 | THR4          |
| YCL001W                                          | RER1          | YNL041C                 | COG6          |
| YLR292C                                          | SEC72         | YBR171W                 | SEC66         |
| YNL044W                                          | YIP3          | YJL204C                 | RCY1          |

| Predictions at threshold level 0.85 continued... |               |                         |               |
|--------------------------------------------------|---------------|-------------------------|---------------|
| Gene1 of predicted pair                          |               | Gene2 of predicted pair |               |
| Systematic Name                                  | Standard Name | Systematic Name         | Standard Name |
| YBR041W                                          | FAT1          | YMR038C                 | CCS1          |
| YJL183W                                          | MNN11         | YJR084W                 | CSN12         |
| YNL288W                                          | CAF40         | YIL038C                 | NOT3          |
| YPL256C                                          | CLN2          | YGL003C                 | CDH1          |
| YKR001C                                          | VPS1          | YLR396C                 | VPS33         |
| YPL022W                                          | RAD1          | YMR201C                 | RAD14         |
| YPL147W                                          | PXA1          | YKL188C                 | PXA2          |
| YIL159W                                          | BNR1          | YKL129C                 | MYO3          |
| YOR129C                                          | YOR129C       | YNL225C                 | CNM67         |
| YNL307C                                          | MCK1          | YDR254W                 | CHL4          |
| YDR174W                                          | HMO1          | YNL307C                 | MCK1          |
| YKL110C                                          | KTI12         | YHR187W                 | IKI1          |
| YOR085W                                          | OST3          | YEL036C                 | ANP1          |
| YER116C                                          | SLX8          | YGL031C                 | RPL24A        |
| YMR198W                                          | CIK1          | YOR195W                 | SLK19         |
| YLR360W                                          | VPS38         | YNL199C                 | GCR2          |
| YPR036W                                          | VMA13         | YHR039C-A               | VMA10         |
| YDL227C                                          | HO            | YER143W                 | DDI1          |
| YLR181C                                          | VTA1          | YOR275C                 | RIM20         |
| YLR109W                                          | AHP1          | YGR209C                 | TRX2          |
| YHL025W                                          | SNF6          | YDR073W                 | SNF11         |
| YER054C                                          | GIP2          | YAR014C                 | BUD14         |
| YLR079W                                          | SIC1          | YDL155W                 | CLB3          |
| YGR241C                                          | YAP1802       | YBL017C                 | PEP1          |
| YDR422C                                          | SIP1          | YDR028C                 | REG1          |
| YLR234W                                          | TOP3          | YLR386W                 | VAC14         |
| YLR399C                                          | BDF1          | YGL019W                 | CKB1          |
| YLR148W                                          | PEP3          | YLR396C                 | VPS33         |
| YBR057C                                          | MUM2          | YPR046W                 | MCM16         |

| Predictions at threshold level 0.85 continued... |               |                         |               |
|--------------------------------------------------|---------------|-------------------------|---------------|
| Gene1 of predicted pair                          |               | Gene2 of predicted pair |               |
| Systematic Name                                  | Standard Name | Systematic Name         | Standard Name |
| YBR041W                                          | FAT1          | YMR152W                 | YIM1          |
| YER110C                                          | KAP123        | YGR252W                 | GCN5          |
| YGR261C                                          | APL6          | YKL135C                 | APL2          |
| YML095C                                          | RAD10         | YKL032C                 | IXR1          |
| YJL127C                                          | SPT10         | YMR179W                 | SPT21         |
| YDR176W                                          | NGG1          | YGL013C                 | PDR1          |
| YPR171W                                          | BSP1          | YKL213C                 | DOA1          |
| YBR108W                                          | YBR108W       | YMR109W                 | MYO5          |
| YBL078C                                          | ATG8          | YLR043C                 | TRX1          |
| YDR293C                                          | SSD1          | YLR386W                 | VAC14         |
| YGR252W                                          | GCN5          | YOR141C                 | ARP8          |
| YDR363W-A                                        | SEM1          | YLR357W                 | RSC2          |
| YJL183W                                          | MNN11         | YGL124C                 | MON1          |
| YNL243W                                          | SLA2          | YNL084C                 | END3          |
| YML001W                                          | YPT7          | YPL195W                 | APL5          |
| YLR303W                                          | MET17         | YNR065C                 | YNR065C       |
| YER120W                                          | SCS2          | YPL120W                 | VPS30         |
| YPL001W                                          | HAT1          | YLL022C                 | HIF1          |
| YLR303W                                          | MET17         | YOL126C                 | MDH2          |
| YLR288C                                          | MEC3          | YDR310C                 | SUM1          |
| YJL176C                                          | SWI3          | YMR091C                 | NPL6          |
| YML115C                                          | VAN1          | YJR032W                 | CPR7          |
| YBR200W                                          | BEM1          | YJL157C                 | FAR1          |
| YBR200W                                          | BEM1          | YLR429W                 | CRN1          |
| YJR090C                                          | GRR1          | YHR114W                 | BZZ1          |
| YLR386W                                          | VAC14         | YBL047C                 | EDE1          |
| YCL001W                                          | RER1          | YER120W                 | SCS2          |
| YPL195W                                          | APL5          | YKR030W                 | GMH1          |
| YLR452C                                          | SST2          | YJL183W                 | MNN11         |

| Predictions at threshold level 0.85 continued... |               |                         |               |
|--------------------------------------------------|---------------|-------------------------|---------------|
| Gene1 of predicted pair                          |               | Gene2 of predicted pair |               |
| Systematic Name                                  | Standard Name | Systematic Name         | Standard Name |
| YOR109W                                          | INP53         | YGL054C                 | ERV14         |
| YDR480W                                          | DIG2          | YBR083W                 | TEC1          |
| YHR114W                                          | BZZ1          | YPR119W                 | CLB2          |
| YBR289W                                          | SNF5          | YHL025W                 | SNF6          |
| YML109W                                          | ZDS2          | YBL085W                 | BOI1          |
| YJR135C                                          | MCM22         | YPR046W                 | MCM16         |
| YML115C                                          | VAN1          | YKL032C                 | IXR1          |
| YJL004C                                          | SYS1          | YPR032W                 | SRO7          |
| YPR017C                                          | DSS4          | YOR327C                 | SNC2          |
| YCL001W                                          | RER1          | YFL048C                 | EMP47         |
| YPR119W                                          | CLB2          | YOL108C                 | INO4          |
| YOR327C                                          | SNC2          | YJL164C                 | TPK1          |
| YDR004W                                          | RAD57         | YGR184C                 | UBR1          |
| YDR146C                                          | SWI5          | YGL151W                 | NUT1          |
| YKL164C                                          | PIR1          | YKL114C                 | APN1          |
| YMR201C                                          | RAD14         | YOL090W                 | MSH2          |
| YBR009C                                          | HHF1          | YOR038C                 | HIR2          |
| YJR005W                                          | APL1          | YKL114C                 | APN1          |
| YER124C                                          | DSE1          | YBL085W                 | BOI1          |
| YML115C                                          | VAN1          | YLR093C                 | NYV1          |
| YGL033W                                          | HOP2          | YEL053C                 | MAK10         |
| YEL046C                                          | GLY1          | YPL249C                 | GYP5          |
| YGL115W                                          | SNF4          | YNL238W                 | KEX2          |
| YIL159W                                          | BNR1          | YLR370C                 | ARC18         |
| YNL068C                                          | FKH2          | YKR048C                 | NAP1          |
| YLR234W                                          | TOP3          | YMR116C                 | ASC1          |
| YOR270C                                          | VPH1          | YLR447C                 | VMA6          |
| YPL129W                                          | TAF14         | YDL002C                 | NHP10         |
| YDR363W-A                                        | SEM1          | YPL018W                 | CTF19         |

| Predictions at threshold level 0.85 continued... |               |                         |               |
|--------------------------------------------------|---------------|-------------------------|---------------|
| Gene1 of predicted pair                          |               | Gene2 of predicted pair |               |
| Systematic Name                                  | Standard Name | Systematic Name         | Standard Name |
| YNL199C                                          | GCR2          | YEL013W                 | VAC8          |
| YPR018W                                          | RLF2          | YNL236W                 | SIN4          |
| YOR132W                                          | VPS17         | YNL238W                 | KEX2          |
| YDR484W                                          | VPS52         | YBR171W                 | SEC66         |
| YMR224C                                          | MRE11         | YJL006C                 | CTK2          |
| YKL010C                                          | UFD4          | YBR082C                 | UBC4          |
| YPL001W                                          | HAT1          | YEL056W                 | HAT2          |
| YMR224C                                          | MRE11         | YLR135W                 | SLX4          |
| YDR129C                                          | SAC6          | YML016C                 | PPZ1          |
| YGR135W                                          | PRE9          | YDR440W                 | DOT1          |
| YER019C-A                                        | SBH2          | YOR085W                 | OST3          |
| YML095C                                          | RAD10         | YNL236W                 | SIN4          |
| YCL037C                                          | SRO9          | YOR109W                 | INP53         |
| YMR092C                                          | AIP1          | YLR429W                 | CRN1          |
| YPR017C                                          | DSS4          | YNL238W                 | KEX2          |
| YIL076W                                          | SEC28         | YHL031C                 | GOS1          |
| YNL031C                                          | HHT2          | YBR289W                 | SNF5          |
| YDR490C                                          | PKH1          | YPL004C                 | LSP1          |
| YLR083C                                          | EMP70         | YGR072W                 | UPF3          |
| YPL042C                                          | SSN3          | YIL038C                 | NOT3          |
| YGR081C                                          | SLX9          | YKL068W                 | NUP100        |
| YNL093W                                          | YPT53         | YKR014C                 | YPT52         |
| YKL080W                                          | VMA5          | YKL119C                 | VPH2          |
| YJL172W                                          | CPS1          | YER044C                 | ERG28         |
| YOR096W                                          | RPS7A         | YHR203C                 | RPS4B         |
| YNL288W                                          | CAF40         | YER068W                 | MOT2          |
| YBR200W                                          | BEM1          | YKL101W                 | HSL1          |
| YNR052C                                          | POP2          | YJL006C                 | CTK2          |
| YIL076W                                          | SEC28         | YPR030W                 | CSR2          |

| Predictions at threshold level 0.85 continued... |               |                         |               |
|--------------------------------------------------|---------------|-------------------------|---------------|
| Gene1 of predicted pair                          |               | Gene2 of predicted pair |               |
| Systematic Name                                  | Standard Name | Systematic Name         | Standard Name |
| YDR383C                                          | NKP1          | YJR135C                 | MCM22         |
| YNL199C                                          | GCR2          | YML057W                 | CMP2          |
| YPL161C                                          | BEM4          | YDR264C                 | AKR1          |
| YOR033C                                          | EXO1          | YMR167W                 | MLH1          |
| YHR156C                                          | LIN1          | YBL103C                 | RTG3          |
| YIL045W                                          | PIG2          | YAR014C                 | BUD14         |
| YIL159W                                          | BNR1          | YLR398C                 | SKI2          |
| YEL043W                                          | YEL043W       | YDR153C                 | ENT5          |
| YKL048C                                          | ELM1          | YML001W                 | YPT7          |
| YGL200C                                          | EMP24         | YKR020W                 | VPS51         |
| YLR191W                                          | PEX13         | YAL055W                 | PEX22         |
| YPR029C                                          | APL4          | YDR358W                 | GGA1          |
| YMR198W                                          | CIK1          | YMR055C                 | BUB2          |
| YBR126C                                          | TPS1          | YLR452C                 | SST2          |
| YLL039C                                          | UBI4          | YPL161C                 | BEM4          |
| YBR126C                                          | TPS1          | YML100W                 | TSL1          |
| YML016C                                          | PPZ1          | YAR014C                 | BUD14         |
| YKR020W                                          | VPS51         | YDL226C                 | GCS1          |
| YDR383C                                          | NKP1          | YPR046W                 | MCM16         |
| YOR069W                                          | VPS5          | YKR001C                 | VPS1          |
| YOL013C                                          | HRD1          | YLR207W                 | HRD3          |
| YGR100W                                          | MDR1          | YGL198W                 | YIP4          |
| YMR198W                                          | CIK1          | YPL022W                 | RAD1          |
| YHR152W                                          | SPO12         | YHR111W                 | UBA4          |
| YIL148W                                          | RPL40A        | YER115C                 | SPR6          |
| YLR381W                                          | CTF3          | YFR036W                 | CDC26         |
| YBR084C-A                                        | RPL19A        | YGL246C                 | RAI1          |
| YFR008W                                          | FAR7          | YDR200C                 | VPS64         |
| YBR289W                                          | SNF5          | YJL140W                 | RPB4          |

| Predictions at threshold level 0.85 continued... |               |                         |               |
|--------------------------------------------------|---------------|-------------------------|---------------|
| Gene1 of predicted pair                          |               | Gene2 of predicted pair |               |
| Systematic Name                                  | Standard Name | Systematic Name         | Standard Name |
| YCL073C                                          | YCL073C       | YPL240C                 | HSP82         |
| YLR061W                                          | RPL22A        | YOR035C                 | SHE4          |
| YLR396C                                          | VPS33         | YLR093C                 | NYV1          |
| YNL044W                                          | YIP3          | YML071C                 | COG8          |
| YMR153W                                          | NUP53         | YJL172W                 | CPS1          |
| YLR386W                                          | VAC14         | YNL229C                 | URE2          |
| YJL151C                                          | SNA3          | YMR253C                 | YMR253C       |
| YLR360W                                          | VPS38         | YEL043W                 | YEL043W       |
| YPL042C                                          | SSN3          | YOR001W                 | RRP6          |
| YPL115C                                          | BEM3          | YKL048C                 | ELM1          |
| YBR200W                                          | BEM1          | YOR014W                 | RTS1          |
| YDL020C                                          | RPN4          | YBR114W                 | RAD16         |
| YDR076W                                          | RAD55         | YOR368W                 | RAD17         |
| YDL020C                                          | RPN4          | YFR010W                 | UBP6          |
| YJL154C                                          | VPS35         | YOR132W                 | VPS17         |
| YJL204C                                          | RCY1          | YDR139C                 | RUB1          |
| YBR228W                                          | SLX1          | YMR038C                 | CCS1          |
| YDL116W                                          | NUP84         | YPL125W                 | KAP120        |
| YIL076W                                          | SEC28         | YML001W                 | YPT7          |
| YNL236W                                          | SIN4          | YJL140W                 | RPB4          |
| YBR200W                                          | BEM1          | YPL106C                 | SSE1          |
| YJL172W                                          | CPS1          | YDR310C                 | SUM1          |
| YGL115W                                          | SNF4          | YJL095W                 | BCK1          |
| YBL008W                                          | HIR1          | YBR010W                 | HHT1          |
| YER096W                                          | SHC1          | YLR371W                 | ROM2          |
| YIR025W                                          | MND2          | YLR102C                 | APC9          |
| YMR179W                                          | SPT21         | YDR207C                 | UME6          |
| YCL001W                                          | RER1          | YPL227C                 | ALG5          |
| YDR225W                                          | HTA1          | YKR048C                 | NAP1          |

| Predictions at threshold level 0.85 continued... |               |                         |               |
|--------------------------------------------------|---------------|-------------------------|---------------|
| Gene1 of predicted pair                          |               | Gene2 of predicted pair |               |
| Systematic Name                                  | Standard Name | Systematic Name         | Standard Name |
| YLR288C                                          | MEC3          | YBR278W                 | DPB3          |
| YNL333W                                          | SNZ2          | YAR014C                 | BUD14         |
| YFR010W                                          | UBP6          | YPR046W                 | MCM16         |
| YGR020C                                          | VMA7          | YEL027W                 | CUP5          |
| YMR199W                                          | CLN1          | YKL068W                 | NUP100        |
| YKL214C                                          | YRA2          | YNL139C                 | RLR1          |
| YOR332W                                          | VMA4          | YOR270C                 | VPH1          |
| YMR116C                                          | ASC1          | YOR275C                 | RIM20         |
| YPL161C                                          | BEM4          | YNL107W                 | YAF9          |
| YGL180W                                          | ATG1          | YLR423C                 | ATG17         |
| YLR422W                                          | YLR422W       | YOL108C                 | INO4          |
| YCR063W                                          | BUD31         | YBR188C                 | NTC20         |
| YIL034C                                          | CAP2          | YHR134W                 | WSS1          |
| YGL033W                                          | HOP2          | YLR094C                 | GIS3          |
| YGR104C                                          | SRB5          | YCR084C                 | TUP1          |
| YIL034C                                          | CAP2          | YOR208W                 | PTP2          |
| YOR038C                                          | HIR2          | YDR073W                 | SNF11         |
| YEL013W                                          | VAC8          | YOR124C                 | UBP2          |
| YKL048C                                          | ELM1          | YKR020W                 | VPS51         |
| YLR362W                                          | STE11         | YER118C                 | SHO1          |
| YGL153W                                          | PEX14         | YAL055W                 | PEX22         |
| YGL066W                                          | SGF73         | YLR381W                 | CTF3          |
| YOR033C                                          | EXO1          | YNL307C                 | MCK1          |
| YDR137W                                          | RGP1          | YLR350W                 | ORM2          |
| YML001W                                          | YPT7          | YGL124C                 | MON1          |
| YLR191W                                          | PEX13         | YGR077C                 | PEX8          |
| YDR260C                                          | SWM1          | YFR036W                 | CDC26         |
| YIL033C                                          | BCY1          | YBL106C                 | SRO77         |
| YML115C                                          | VAN1          | YOR106W                 | VAM3          |



| Predictions at threshold level 0.85 continued... |               |                         |               |
|--------------------------------------------------|---------------|-------------------------|---------------|
| Gene1 of predicted pair                          |               | Gene2 of predicted pair |               |
| Systematic Name                                  | Standard Name | Systematic Name         | Standard Name |
| YOR367W                                          | SCP1          | YDL226C                 | GCS1          |
| YLR360W                                          | VPS38         | YPR032W                 | SRO7          |
| YJL172W                                          | CPS1          | YLR398C                 | SKI2          |
| YKL007W                                          | CAP1          | YNL135C                 | FPR1          |
| YLR371W                                          | ROM2          | YNL090W                 | RHO2          |
| YDL116W                                          | NUP84         | YBL008W                 | HIR1          |
| YGL223C                                          | COG1          | YPL195W                 | APL5          |
| YHR079C                                          | IRE1          | YER089C                 | PTC2          |
| YDR363W-A                                        | SEM1          | YPL248C                 | GAL4          |
| YLR144C                                          | ACF2          | YHR016C                 | YSC84         |
| YPR171W                                          | BSP1          | YNL094W                 | APP1          |
| YHR150W                                          | PEX28         | YLR324W                 | PEX30         |
| YDR004W                                          | RAD57         | YDR076W                 | RAD55         |
| YER087C-B                                        | SBH1          | YGL198W                 | YIP4          |
| YOL051W                                          | GAL11         | YPR072W                 | NOT5          |
| YER116C                                          | SLX8          | YDR137W                 | RGP1          |
| YDR129C                                          | SAC6          | YMR109W                 | MYO5          |
| YLR456W                                          | YLR456W       | YKR084C                 | HBS1          |
| YNL094W                                          | APP1          | YHR016C                 | YSC84         |
| YLL039C                                          | UBI4          | YDR245W                 | MNN10         |
| YMR198W                                          | CIK1          | YDL006W                 | PTC1          |
| YLR399C                                          | BDF1          | YOR038C                 | HIR2          |
| YML095C                                          | RAD10         | YJR035W                 | RAD26         |
| YGR020C                                          | VMA7          | YKL119C                 | VPH2          |
| YDL020C                                          | RPN4          | YHL030W                 | ECM29         |
| YBR111W-A                                        | SUS1          | YOL012C                 | HTZ1          |
| YDR080W                                          | VPS41         | YOR327C                 | SNC2          |
| YGL033W                                          | HOP2          | YPL137C                 | GIP3          |
| YKR014C                                          | YPT52         | YGL198W                 | YIP4          |

| Predictions at threshold level 0.85 continued... |               |                         |               |
|--------------------------------------------------|---------------|-------------------------|---------------|
| Gene1 of predicted pair                          |               | Gene2 of predicted pair |               |
| Systematic Name                                  | Standard Name | Systematic Name         | Standard Name |
| YMR198W                                          | CIK1          | YOR368W                 | RAD17         |
| YKL135C                                          | APL2          | YPL259C                 | APM1          |
| YKL135C                                          | APL2          | YJR125C                 | ENT3          |
| YLR102C                                          | APC9          | YDR507C                 | GIN4          |
| YGL190C                                          | CDC55         | YHR191C                 | CTF8          |
| YDR335W                                          | MSN5          | YJR063W                 | RPA12         |
| YJL172W                                          | CPS1          | YNL238W                 | KEX2          |
| YKR059W                                          | TIF1          | YLR288C                 | MEC3          |
| YGL212W                                          | VAM7          | YOR327C                 | SNC2          |
| YDR448W                                          | ADA2          | YLR357W                 | RSC2          |
| YKL160W                                          | ELF1          | YGL019W                 | CKB1          |
| YDL155W                                          | CLB3          | YDR310C                 | SUM1          |
| YBR030W                                          | YBR030W       | YBL025W                 | RRN10         |
| YBR228W                                          | SLX1          | YOR243C                 | PUS7          |
| YFR031C-A                                        | RPL2A         | YER122C                 | GLO3          |
| YBR131W                                          | CCZ1          | YDR080W                 | VPS41         |
| YDL042C                                          | SIR2          | YNL031C                 | HHT2          |
| YOR083W                                          | WHI5          | YLR079W                 | SIC1          |
| YHR052W                                          | CIC1          | YJL189W                 | RPL39         |
| YLR452C                                          | SST2          | YPL195W                 | APL5          |
| YJL029C                                          | VPS53         | YOL018C                 | TLG2          |
| YDR156W                                          | RPA14         | YJL117W                 | PHO86         |
| YOR195W                                          | SLK19         | YDR318W                 | MCM21         |
| YER110C                                          | KAP123        | YBR010W                 | HHT1          |
| YER044C                                          | ERG28         | YLR370C                 | ARC18         |
| YCR084C                                          | TUP1          | YPL248C                 | GAL4          |
| YKL135C                                          | APL2          | YPR119W                 | CLB2          |
| YMR198W                                          | CIK1          | YKL101W                 | HSL1          |
| YOL148C                                          | SPT20         | YGL252C                 | RTG2          |

| Predictions at threshold level 0.85 continued... |               |                         |               |
|--------------------------------------------------|---------------|-------------------------|---------------|
| Gene1 of predicted pair                          |               | Gene2 of predicted pair |               |
| Systematic Name                                  | Standard Name | Systematic Name         | Standard Name |
| YLR396C                                          | VPS33         | YDL077C                 | VAM6          |
| YPL047W                                          | SGF11         | YBR111W-A               | SUS1          |
| YMR273C                                          | ZDS1          | YDR227W                 | SIR4          |
| YBR200W                                          | BEM1          | YDR379W                 | RGA2          |
| YPL024W                                          | RMI1          | YKR059W                 | TIF1          |
| YHR200W                                          | RPN10         | YJL140W                 | RPB4          |
| YBR200W                                          | BEM1          | YNL076W                 | MKS1          |
| YMR116C                                          | ASC1          | YOR080W                 | DIA2          |
| YOR033C                                          | EXO1          | YDL020C                 | RPN4          |
| YNL243W                                          | SLA2          | YBR098W                 | MMS4          |
| YPL178W                                          | CBC2          | YMR125W                 | STO1          |
| YHR039C-A                                        | VMA10         | YMR054W                 | STV1          |
| YMR052W                                          | FAR3          | YNL127W                 | FAR11         |
| YLR133W                                          | CKI1          | YMR022W                 | UBC7          |
| YOR275C                                          | RIM20         | YHL011C                 | PRS3          |
| YLR064W                                          | YLR064W       | YHR016C                 | YSC84         |
| YNR032C-A                                        | HUB1          | YLR313C                 | SPH1          |
| YFR031C-A                                        | RPL2A         | YLR386W                 | VAC14         |
| YHR200W                                          | RPN10         | YKR020W                 | VPS51         |
| YDR363W-A                                        | SEM1          | YMR276W                 | DSK2          |
| YNL307C                                          | MCK1          | YJL006C                 | CTK2          |
| YMR198W                                          | CIK1          | YDR318W                 | MCM21         |
| YER122C                                          | GLO3          | YDL137W                 | ARF2          |
| YNL238W                                          | KEX2          | YDL192W                 | ARF1          |
| YNL215W                                          | IES2          | YPR120C                 | CLB5          |
| YNL021W                                          | HDA1          | YDR295C                 | HDA2          |
| YDL192W                                          | ARF1          | YNL051W                 | COG5          |
| YGL135W                                          | RPL1B         | YGR105W                 | VMA21         |
| YDR484W                                          | VPS52         | YER122C                 | GLO3          |

| Predictions at threshold level 0.85 continued... |               |                         |               |
|--------------------------------------------------|---------------|-------------------------|---------------|
| Gene1 of predicted pair                          |               | Gene2 of predicted pair |               |
| Systematic Name                                  | Standard Name | Systematic Name         | Standard Name |
| YBR010W                                          | HHT1          | YJL140W                 | RPB4          |
| YHL031C                                          | GOS1          | YDL192W                 | ARF1          |
| YNL201C                                          | PSY2          | YNL307C                 | MCK1          |
| YMR273C                                          | ZDS1          | YIL033C                 | BCY1          |
| YOR033C                                          | EXO1          | YJR035W                 | RAD26         |
| YIL033C                                          | BCY1          | YJL164C                 | TPK1          |
| YNL025C                                          | SSN8          | YNL288W                 | CAF40         |
| YNL201C                                          | PSY2          | YPR040W                 | TIP41         |
| YMR231W                                          | PEP5          | YOR036W                 | PEP12         |
| YOR085W                                          | OST3          | YML019W                 | OST6          |
| YPL239W                                          | YAR1          | YKL143W                 | LTV1          |
| YDR083W                                          | RRP8          | YOR001W                 | RRP6          |
| YHR156C                                          | LIN1          | YGL124C                 | MON1          |
| YMR311C                                          | GLC8          | YER122C                 | GLO3          |
| YDL232W                                          | OST4          | YER019C-A               | SBH2          |
| YMR153W                                          | NUP53         | YKL068W                 | NUP100        |
| YBR228W                                          | SLX1          | YER116C                 | SLX8          |
| YHR039C-A                                        | VMA10         | YGR105W                 | VMA21         |
| YMR199W                                          | CLN1          | YJL187C                 | SWE1          |
| YOR109W                                          | INP53         | YKR001C                 | VPS1          |
| YDL184C                                          | RPL41A        | YBR108W                 | YBR108W       |
| YMR091C                                          | NPL6          | YNL041C                 | COG6          |
| YML115C                                          | VAN1          | YKR014C                 | YPT52         |
| YER129W                                          | SAK1          | YDR507C                 | GIN4          |
| YDR245W                                          | MNN10         | YAL002W                 | VPS8          |
| YCL037C                                          | SRO9          | YKR030W                 | GMH1          |
| YMR224C                                          | MRE11         | YLR399C                 | BDF1          |
| YLR360W                                          | VPS38         | YPR046W                 | MCM16         |
| YDL175C                                          | AIR2          | YJL124C                 | LSM1          |

| Predictions at threshold level 0.85 continued... |               |                         |               |
|--------------------------------------------------|---------------|-------------------------|---------------|
| Gene1 of predicted pair                          |               | Gene2 of predicted pair |               |
| Systematic Name                                  | Standard Name | Systematic Name         | Standard Name |
| YIR009W                                          | MSL1          | YJR050W                 | ISY1          |
| YGR252W                                          | GCN5          | YCR084C                 | TUP1          |
| YBR194W                                          | SOY1          | YDR335W                 | MSN5          |
| YDR225W                                          | HTA1          | YHR200W                 | RPN10         |
| YBR228W                                          | SLX1          | YNL016W                 | PUB1          |
| YGR054W                                          | YGR054W       | YJR032W                 | CPR7          |
| YGL054C                                          | ERV14         | YER120W                 | SCS2          |
| YOR231W                                          | MKK1          | YPR119W                 | CLB2          |
| YBR127C                                          | VMA2          | YKL119C                 | VPH2          |
| YGL212W                                          | VAM7          | YPL195W                 | APL5          |
| YCR088W                                          | ABP1          | YHR016C                 | YSC84         |
| YJL124C                                          | LSM1          | YNL145W                 | MFA2          |
| YML001W                                          | YPT7          | YBR036C                 | CSG2          |
| YHR079C                                          | IRE1          | YGR252W                 | GCN5          |
| YML095C                                          | RAD10         | YDR289C                 | RTT103        |
| YGL241W                                          | KAP114        | YGR252W                 | GCN5          |
| YBR019C                                          | GAL10         | YGL252C                 | RTG2          |
| YDR490C                                          | PKH1          | YHR205W                 | SCH9          |
| YPL195W                                          | APL5          | YJL183W                 | MNN11         |
| YDR244W                                          | PEX5          | YNL214W                 | PEX17         |
| YKL129C                                          | MYO3          | YJL095W                 | BCK1          |
| YGL200C                                          | EMP24         | YEL036C                 | ANP1          |
| YDR156W                                          | RPA14         | YCR086W                 | CSM1          |
| YMR026C                                          | PEX12         | YER044C                 | ERG28         |
| YDL116W                                          | NUP84         | YDR335W                 | MSN5          |
| YPR036W                                          | VMA13         | YDL185W                 | TFP1          |
| YFR010W                                          | UBP6          | YLR381W                 | CTF3          |
| YHR134W                                          | WSS1          | YDR155C                 | CPR1          |
| YML109W                                          | ZDS2          | YPL161C                 | BEM4          |

| Predictions at threshold level 0.85 continued... |               |                         |               |
|--------------------------------------------------|---------------|-------------------------|---------------|
| Gene1 of predicted pair                          |               | Gene2 of predicted pair |               |
| Systematic Name                                  | Standard Name | Systematic Name         | Standard Name |
| YMR192W                                          | GYL1          | YPR154W                 | PIN3          |
| YPL115C                                          | BEM3          | YBR200W                 | BEM1          |
| YNL199C                                          | GCR2          | YOR124C                 | UBP2          |
| YMR199W                                          | CLN1          | YPR120C                 | CLB5          |
| YKR101W                                          | SIR1          | YNL107W                 | YAF9          |
| YBL103C                                          | RTG3          | YLR094C                 | GIS3          |
| YCR065W                                          | HCM1          | YJR060W                 | CBF1          |
| YOR212W                                          | STE4          | YPL161C                 | BEM4          |
| YFR031C-A                                        | RPL2A         | YPL024W                 | RMI1          |
| YMR216C                                          | SKY1          | YCL001W                 | RER1          |
| YDL042C                                          | SIR2          | YMR273C                 | ZDS1          |
| YGR004W                                          | PEX31         | YBR168W                 | PEX32         |
| YMR273C                                          | ZDS1          | YDR309C                 | GIC2          |
| YMR116C                                          | ASC1          | YNL079C                 | TPM1          |
| YDR254W                                          | CHL4          | YJR135C                 | MCM22         |
| YIL034C                                          | CAP2          | YCR088W                 | ABP1          |
| YKL074C                                          | MUD2          | YLR357W                 | RSC2          |
| YLR337C                                          | VRP1          | YLR381W                 | CTF3          |
| YDR329C                                          | PEX3          | YGR077C                 | PEX8          |
| YGL054C                                          | ERV14         | YNL041C                 | COG6          |
| YNL201C                                          | PSY2          | YBL046W                 | PSY4          |
| YJL080C                                          | SCP160        | YOR198C                 | BFR1          |
| YJR083C                                          | ACF4          | YHR016C                 | YSC84         |
| YPR171W                                          | BSP1          | YIL034C                 | CAP2          |
| YLR018C                                          | POM34         | YDR192C                 | NUP42         |
| YJL176C                                          | SWI3          | YOR038C                 | HIR2          |
| YJR082C                                          | EAF6          | YNL107W                 | YAF9          |
| YLR399C                                          | BDF1          | YDR318W                 | MCM21         |
| YDR383C                                          | NKP1          | YBR107C                 | IML3          |

| Predictions at threshold level 0.85 continued... |               |                         |               |
|--------------------------------------------------|---------------|-------------------------|---------------|
| Gene1 of predicted pair                          |               | Gene2 of predicted pair |               |
| Systematic Name                                  | Standard Name | Systematic Name         | Standard Name |
| YDL059C                                          | RAD59         | YGL163C                 | RAD54         |
| YNL238W                                          | KEX2          | YOR327C                 | SNC2          |
| YDL005C                                          | MED2          | YBR010W                 | HHT1          |
| YNL307C                                          | MCK1          | YHR060W                 | VMA22         |
| YHR124W                                          | NDT80         | YJL106W                 | IME2          |
| YFR034C                                          | PHO4          | YOL108C                 | INO4          |
| YBR107C                                          | IML3          | YPR046W                 | MCM16         |
| YEL056W                                          | HAT2          | YOR368W                 | RAD17         |
| YMR055C                                          | BUB2          | YHR061C                 | GIC1          |
| YBR200W                                          | BEM1          | YGR054W                 | YGR054W       |
| YHR060W                                          | VMA22         | YMR133W                 | REC114        |
| YOR106W                                          | VAM3          | YMR231W                 | PEP5          |
| YHL011C                                          | PRS3          | YKL161C                 | YKL161C       |
| YJL154C                                          | VPS35         | YHR012W                 | VPS29         |
| YLR192C                                          | HCR1          | YIL071C                 | PCI8          |
| YMR242C                                          | RPL20A        | YGL246C                 | RAI1          |
| YLR102C                                          | APC9          | YMR199W                 | CLN1          |
| YDR080W                                          | VPS41         | YLR396C                 | VPS33         |
| YML103C                                          | NUP188        | YGL100W                 | SEH1          |
| YCL011C                                          | GBP2          | YHR167W                 | THP2          |
| YDR379W                                          | RGA2          | YPL256C                 | CLN2          |
| YDR295C                                          | HDA2          | YLR131C                 | ACE2          |
| YBL003C                                          | HTA2          | YBR111W-A               | SUS1          |
| YIL034C                                          | CAP2          | YOR127W                 | RGA1          |
| YDR378C                                          | LSM6          | YIR005W                 | IST3          |
| YOR327C                                          | SNC2          | YMR017W                 | SPO20         |
| YOR290C                                          | SNF2          | YNL031C                 | HHT2          |
| YML115C                                          | VAN1          | YDR261C                 | EXG2          |
| YML117W                                          | NAB6          | YDL006W                 | PTC1          |

| Predictions at threshold level 0.85 continued... |               |                         |               |
|--------------------------------------------------|---------------|-------------------------|---------------|
| Gene1 of predicted pair                          |               | Gene2 of predicted pair |               |
| Systematic Name                                  | Standard Name | Systematic Name         | Standard Name |
| YLR227C                                          | ADY4          | YOL091W                 | SPO21         |
| YDL154W                                          | MSH5          | YLR394W                 | CST9          |
| YPL042C                                          | SSN3          | YPL248C                 | GAL4          |
| YDR448W                                          | ADA2          | YCL010C                 | SGF29         |
| YNL004W                                          | HRB1          | YHR167W                 | THP2          |
| YMR095C                                          | SNO1          | YKR099W                 | BAS1          |
| YMR224C                                          | MRE11         | YOR290C                 | SNF2          |
| YDR156W                                          | RPA14         | YJR063W                 | RPA12         |
| YHR156C                                          | LIN1          | YPL161C                 | BEM4          |
| YBL003C                                          | HTA2          | YGR252W                 | GCN5          |
| YFR036W                                          | CDC26         | YGR188C                 | BUB1          |
| YIR005W                                          | IST3          | YDR440W                 | DOT1          |
| YLR109W                                          | AHP1          | YPR167C                 | MET16         |
| YBL003C                                          | HTA2          | YBR010W                 | HHT1          |
| YGR241C                                          | YAP1802       | YDR484W                 | VPS52         |
| YNL106C                                          | INP52         | YHR077C                 | NMD2          |
| YGR041W                                          | BUD9          | YLR353W                 | BUD8          |



Predicted pairs at a threshold level of 0.90

| Predictions at threshold level 0.90 |               |                         |               |
|-------------------------------------|---------------|-------------------------|---------------|
| Gene1 of predicted pair             |               | Gene2 of predicted pair |               |
| Systematic Name                     | Standard Name | Systematic Name         | Standard Name |
| YHR056C                             | RSC30         | YPR119W                 | CLB2          |
| YDR012W                             | RPL4B         | YOR078W                 | BUD21         |
| YBR017C                             | KAP104        | YKL057C                 | NUP120        |
| YDL065C                             | PEX19         | YGL153W                 | PEX14         |
| YML099C                             | ARG81         | YDR207C                 | UME6          |
| YDR225W                             | HTA1          | YBL003C                 | HTA2          |
| YHR119W                             | SET1          | YBR175W                 | SWD3          |
| YDR395W                             | SXM1          | YKL068W                 | NUP100        |
| YPL046C                             | ELC1          | YNL230C                 | ELA1          |
| YLR423C                             | ATG17         | YPR119W                 | CLB2          |
| YHR052W                             | CIC1          | YLR325C                 | RPL38         |
| YOR290C                             | SNF2          | YKL109W                 | HAP4          |
| YOR039W                             | CKB2          | YGR252W                 | GCN5          |
| YPL147W                             | PXA1          | YPL145C                 | KES1          |
| YOR094W                             | ARF3          | YCL034W                 | LSB5          |
| YPR018W                             | RLF2          | YDR181C                 | SAS4          |
| YGL200C                             | EMP24         | YML012W                 | ERV25         |
| YDR101C                             | ARX1          | YBR267W                 | REI1          |
| YLR043C                             | TRX1          | YER042W                 | MXR1          |
| YBL008W                             | HIR1          | YJL176C                 | SWI3          |
| YPR029C                             | APL4          | YDR153C                 | ENT5          |
| YAL030W                             | SNC1          | YPR032W                 | SRO7          |
| YPL042C                             | SSN3          | YOL051W                 | GAL11         |
| YBR264C                             | YPT10         | YNL044W                 | YIP3          |
| YPL046C                             | ELC1          | YBR114W                 | RAD16         |
| YPL129W                             | TAF14         | YBR289W                 | SNF5          |
| YGL200C                             | EMP24         | YFL048C                 | EMP47         |
| YOL044W                             | PEX15         | YGL153W                 | PEX14         |

| Predictions at threshold level 0.90 continued... |               |                         |               |
|--------------------------------------------------|---------------|-------------------------|---------------|
| Gene1 of predicted pair                          |               | Gene2 of predicted pair |               |
| Systematic Name                                  | Standard Name | Systematic Name         | Standard Name |
| YKR014C                                          | YPT52         | YEL036C                 | ANP1          |
| YBR274W                                          | CHK1          | YNL234W                 | YNL234W       |
| YDR123C                                          | INO2          | YHL020C                 | OPI1          |
| YOR096W                                          | RPS7A         | YOR078W                 | BUD21         |
| YBR089C-A                                        | NHP6B         | YPL248C                 | GAL4          |
| YDL020C                                          | RPN4          | YLR024C                 | UBR2          |
| YJL210W                                          | PEX2          | YLR191W                 | PEX13         |
| YPL203W                                          | TPK2          | YIL033C                 | BCY1          |
| YLR273C                                          | PIG1          | YLR258W                 | GSY2          |
| YDR448W                                          | ADA2          | YDR216W                 | ADR1          |
| YBR270C                                          | BIT2          | YIL105C                 | SLM1          |
| YDR192C                                          | NUP42         | YER110C                 | KAP123        |
| YJL210W                                          | PEX2          | YDR142C                 | PEX7          |
| YOR279C                                          | RFM1          | YDR310C                 | SUM1          |
| YGL178W                                          | MPT5          | YLR452C                 | SST2          |
| YDR176W                                          | NGG1          | YGL252C                 | RTG2          |
| YJL151C                                          | SNA3          | YPL246C                 | RBD2          |
| YML012W                                          | ERV25         | YFL048C                 | EMP47         |
| YGR275W                                          | RTT102        | YDR073W                 | SNF11         |
| YJL083W                                          | TAX4          | YIL002C                 | INP51         |
| YLR191W                                          | PEX13         | YDL065C                 | PEX19         |
| YDR123C                                          | INO2          | YOL108C                 | INO4          |
| YIL140W                                          | AXL2          | YCR038C                 | BUD5          |
| YDR225W                                          | HTA1          | YOR141C                 | ARP8          |
| YHR108W                                          | GGA2          | YDL137W                 | ARF2          |
| YHR200W                                          | RPN10         | YLR421C                 | RPN13         |
| YLR227C                                          | ADY4          | YNL225C                 | CNM67         |
| YFR021W                                          | ATG18         | YJR025C                 | BNA1          |
| YDR477W                                          | SNF1          | YPR119W                 | CLB2          |

| Predictions at threshold level 0.90 continued... |               |                         |               |
|--------------------------------------------------|---------------|-------------------------|---------------|
| Gene1 of predicted pair                          |               | Gene2 of predicted pair |               |
| Systematic Name                                  | Standard Name | Systematic Name         | Standard Name |
| YIR025W                                          | MND2          | YDR260C                 | SWM1          |
| YBR041W                                          | FAT1          | YER044C                 | ERG28         |
| YOR023C                                          | AHC1          | YGR252W                 | GCN5          |
| YDR448W                                          | ADA2          | YPL248C                 | GAL4          |
| YJL004C                                          | SYS1          | YHR016C                 | YSC84         |
| YDL065C                                          | PEX19         | YGR077C                 | PEX8          |
| YIL105C                                          | SLM1          | YJL058C                 | BIT61         |
| YPR119W                                          | CLB2          | YLR032W                 | RAD5          |
| YCR088W                                          | ABP1          | YOR284W                 | HUA2          |
| YGL019W                                          | CKB1          | YPR119W                 | CLB2          |
| YDR225W                                          | HTA1          | YLR399C                 | BDF1          |
| YPR171W                                          | BSP1          | YHR016C                 | YSC84         |
| YGL208W                                          | SIP2          | YGL115W                 | SNF4          |
| YMR139W                                          | RIM11         | YJR094C                 | IME1          |
| YHR103W                                          | SBE22         | YFR021W                 | ATG18         |
| YDR225W                                          | HTA1          | YBL002W                 | HTB2          |
| YDR379W                                          | RGA2          | YGR152C                 | RSR1          |
| YER087C-B                                        | SBH1          | YOR085W                 | OST3          |
| YPL049C                                          | DIG1          | YHR084W                 | STE12         |
| YNL253W                                          | TEX1          | YCL011C                 | GBP2          |
| YDR265W                                          | PEX10         | YNL214W                 | PEX17         |
| YML007W                                          | YAP1          | YGL208W                 | SIP2          |
| YDL127W                                          | PCL2          | YFR034C                 | PHO4          |
| YGR268C                                          | HUA1          | YHR016C                 | YSC84         |
| YNL044W                                          | YIP3          | YNL293W                 | MSB3          |
| YJR032W                                          | CPR7          | YPR119W                 | CLB2          |
| YOR332W                                          | VMA4          | YJR033C                 | RAV1          |
| YFR036W                                          | CDC26         | YPR119W                 | CLB2          |
| YCL032W                                          | STE50         | YDR309C                 | GIC2          |

| Predictions at threshold level 0.90 continued... |               |                         |               |
|--------------------------------------------------|---------------|-------------------------|---------------|
| Gene1 of predicted pair                          |               | Gene2 of predicted pair |               |
| Systematic Name                                  | Standard Name | Systematic Name         | Standard Name |
| YPL001W                                          | HAT1          | YBR009C                 | HHF1          |
| YOR014W                                          | RTS1          | YPR119W                 | CLB2          |
| YLR240W                                          | VPS34         | YPL120W                 | VPS30         |
| YDL042C                                          | SIR2          | YBR009C                 | HHF1          |
| YIR009W                                          | MSL1          | YPR101W                 | SNT309        |
| YMR091C                                          | NPL6          | YLL026W                 | HSP104        |
| YEL009C                                          | GCN4          | YDR146C                 | SWI5          |
| YJL124C                                          | LSM1          | YPL220W                 | RPL1A         |
| YDL052C                                          | SLC1          | YBR041W                 | FAT1          |
| YHR119W                                          | SET1          | YLR015W                 | BRE2          |
| YCR084C                                          | TUP1          | YBR009C                 | HHF1          |
| YDR223W                                          | CRF1          | YJL141C                 | YAK1          |
| YER110C                                          | KAP123        | YNL031C                 | HHT2          |
| YDR477W                                          | SNF1          | YDR422C                 | SIP1          |
| YPL256C                                          | CLN2          | YPR119W                 | CLB2          |
| YOR106W                                          | VAM3          | YLR396C                 | VPS33         |
| YDR225W                                          | HTA1          | YBR010W                 | HHT1          |
| YPL129W                                          | TAF14         | YBR112C                 | CYC8          |
| YML058W                                          | SML1          | YIL066C                 | RNR3          |
| YDL160C                                          | DHH1          | YDR378C                 | LSM6          |
| YMR026C                                          | PEX12         | YGR077C                 | PEX8          |
| YOR106W                                          | VAM3          | YGL124C                 | MON1          |
| YJL006C                                          | CTK2          | YPR119W                 | CLB2          |
| YFR021W                                          | ATG18         | YML059C                 | NTE1          |
| YOR005C                                          | DNL4          | YLR265C                 | NEJ1          |
| YDR329C                                          | PEX3          | YLR191W                 | PEX13         |
| YHL006C                                          | SHU1          | YLR376C                 | PSY3          |
| YIL156W                                          | UBP7          | YKL129C                 | MYO3          |
| YOL051W                                          | GAL11         | YPL248C                 | GAL4          |

| Predictions at threshold level 0.90 continued... |               |                         |               |
|--------------------------------------------------|---------------|-------------------------|---------------|
| Gene1 of predicted pair                          |               | Gene2 of predicted pair |               |
| Systematic Name                                  | Standard Name | Systematic Name         | Standard Name |
| YPL183C                                          | YPL183C       | YBR061C                 | TRM7          |
| YDR225W                                          | HTA1          | YBR111W-A               | SUS1          |
| YDR080W                                          | VPS41         | YLR093C                 | NYV1          |
| YFR034C                                          | PHO4          | YNL289W                 | PCL1          |
| YPL129W                                          | TAF14         | YNL236W                 | SIN4          |
| YDL185W                                          | TFP1          | YMR054W                 | STV1          |
| YDR477W                                          | SNF1          | YDL229W                 | SSB1          |
| YLR148W                                          | PEP3          | YML001W                 | YPT7          |
| YDL005C                                          | MED2          | YPL248C                 | GAL4          |
| YHR052W                                          | CIC1          | YER002W                 | NOP16         |
| YMR068W                                          | AVO2          | YIL105C                 | SLM1          |
| YNL087W                                          | TCB2          | YGL013C                 | PDR1          |
| YEL009C                                          | GCN4          | YGL025C                 | PGD1          |
| YCR097W                                          | HMRA1         | YCL067C                 | HMLALPHA2     |
| YLR148W                                          | PEP3          | YOR106W                 | VAM3          |
| YOR212W                                          | STE4          | YJR086W                 | STE18         |
| YBR239C                                          | YBR239C       | YHR016C                 | YSC84         |
| YPL019C                                          | VTC3          | YER072W                 | VTC1          |
| YJL176C                                          | SWI3          | YKL109W                 | HAP4          |
| YLR148W                                          | PEP3          | YBR131W                 | CCZ1          |
| YDR146C                                          | SWI5          | YGR089W                 | NNF2          |
| YJL204C                                          | RCY1          | YAL030W                 | SNC1          |
| YBR065C                                          | ECM2          | YPL213W                 | LEA1          |
| YDR195W                                          | REF2          | YOR179C                 | SYC1          |
| YOL090W                                          | MSH2          | YGR258C                 | RAD2          |
| YHR200W                                          | RPN10         | YGR232W                 | NAS6          |
| YOL148C                                          | SPT20         | YDR216W                 | ADR1          |
| YGR129W                                          | SYF2          | YPR101W                 | SNT309        |
| YNL025C                                          | SSN8          | YCR081W                 | SRB8          |

| Predictions at threshold level 0.90 continued... |               |                         |               |
|--------------------------------------------------|---------------|-------------------------|---------------|
| Gene1 of predicted pair                          |               | Gene2 of predicted pair |               |
| Systematic Name                                  | Standard Name | Systematic Name         | Standard Name |
| YHR157W                                          | REC104        | YMR133W                 | REC114        |
| YHR108W                                          | GGA2          | YDR153C                 | ENT5          |
| YHL006C                                          | SHU1          | YDR078C                 | SHU2          |
| YLR384C                                          | IKI3          | YHR187W                 | IKI1          |
| YPL129W                                          | TAF14         | YBR111W-A               | SUS1          |
| YFR008W                                          | FAR7          | YMR029C                 | FAR8          |
| YDR443C                                          | SSN2          | YNL288W                 | CAF40         |
| YDR103W                                          | STE5          | YLR362W                 | STE11         |
| YMR192W                                          | GYL1          | YPL249C                 | GYP5          |
| YBR010W                                          | HHT1          | YOR141C                 | ARP8          |
| YML109W                                          | ZDS2          | YER124C                 | DSE1          |
| YGL051W                                          | MST27         | YAR033W                 | MST28         |
| YEL009C                                          | GCN4          | YBR010W                 | HHT1          |
| YML109W                                          | ZDS2          | YCR077C                 | PAT1          |
| YGR252W                                          | GCN5          | YDR216W                 | ADR1          |
| YDR103W                                          | STE5          | YDL159W                 | STE7          |
| YJR010C-A                                        | SPC1          | YDL006W                 | PTC1          |
| YJL176C                                          | SWI3          | YHL025W                 | SNF6          |
| YDR443C                                          | SSN2          | YNL236W                 | SIN4          |
| YNL094W                                          | APP1          | YOR284W                 | HUA2          |
| YCR002C                                          | CDC10         | YNL078W                 | NIS1          |
| YGL212W                                          | VAM7          | YOR036W                 | PEP12         |
| YDR225W                                          | HTA1          | YBR133C                 | HSL7          |
| YOR270C                                          | VPH1          | YER072W                 | VTC1          |
| YFR021W                                          | ATG18         | YER162C                 | RAD4          |
| YDR078C                                          | SHU2          | YLR376C                 | PSY3          |
| YPL129W                                          | TAF14         | YDR146C                 | SWI5          |
| YBR017C                                          | KAP104        | YKL068W                 | NUP100        |
| YPL129W                                          | TAF14         | YOL148C                 | SPT20         |

| Predictions at threshold level 0.90 continued... |               |                         |               |
|--------------------------------------------------|---------------|-------------------------|---------------|
| Gene1 of predicted pair                          |               | Gene2 of predicted pair |               |
| Systematic Name                                  | Standard Name | Systematic Name         | Standard Name |
| YEL009C                                          | GCN4          | YPR072W                 | NOT5          |
| YDL227C                                          | HO            | YML088W                 | UFO1          |
| YGL006W                                          | PMC1          | YLR093C                 | NYV1          |
| YGR275W                                          | RTT102        | YLR357W                 | RSC2          |
| YGR239C                                          | PEX21         | YLR191W                 | PEX13         |
| YBL021C                                          | HAP3          | YKL109W                 | HAP4          |
| YIL072W                                          | HOP1          | YOR351C                 | MEK1          |
| YPL129W                                          | TAF14         | YKL109W                 | HAP4          |
| YDR076W                                          | RAD55         | YPR119W                 | CLB2          |
| YPL129W                                          | TAF14         | YGR252W                 | GCN5          |
| YER087C-B                                        | SBH1          | YDL232W                 | OST4          |
| YDR139C                                          | RUB1          | YLR128W                 | DCN1          |
| YEL009C                                          | GCN4          | YPL042C                 | SSN3          |
| YHL031C                                          | GOS1          | YAL030W                 | SNC1          |
| YDR192C                                          | NUP42         | YLR131C                 | ACE2          |
| YLR191W                                          | PEX13         | YDR265W                 | PEX10         |
| YKR048C                                          | NAP1          | YNL078W                 | NIS1          |
| YHR178W                                          | STB5          | YGL013C                 | PDR1          |
| YER042W                                          | MXR1          | YGR209C                 | TRX2          |
| YDR496C                                          | PUF6          | YKL130C                 | SHE2          |
| YOR083W                                          | WHI5          | YPR119W                 | CLB2          |
| YLR433C                                          | CNA1          | YGR006W                 | PRP18         |
| YKL139W                                          | CTK1          | YCL011C                 | GBP2          |
| YGL025C                                          | PGD1          | YPL248C                 | GAL4          |
| YMR109W                                          | MYO5          | YOR247W                 | SRL1          |
| YGR104C                                          | SRB5          | YGL151W                 | NUT1          |
| YER052C                                          | HOM3          | YNL135C                 | FPR1          |
| YKR001C                                          | VPS1          | YMR204C                 | INP1          |
| YER019C-A                                        | SBH2          | YML019W                 | OST6          |

| Predictions at threshold level 0.90 continued... |               |                         |               |
|--------------------------------------------------|---------------|-------------------------|---------------|
| Gene1 of predicted pair                          |               | Gene2 of predicted pair |               |
| Systematic Name                                  | Standard Name | Systematic Name         | Standard Name |
| YHR206W                                          | SKN7          | YJR074W                 | MOG1          |
| YOR270C                                          | VPH1          | YKL080W                 | VMA5          |
| YJL089W                                          | SIP4          | YMR280C                 | CAT8          |
| YEL009C                                          | GCN4          | YBR111W-A               | SUS1          |
| YOL147C                                          | PEX11         | YDL065C                 | PEX19         |
| YLL022C                                          | HIF1          | YBR009C                 | HHF1          |
| YDL185W                                          | TFP1          | YJR033C                 | RAV1          |
| YCL067C                                          | HMLALPHA2     | YCR084C                 | TUP1          |
| YJL183W                                          | MNN11         | YEL036C                 | ANP1          |
| YOL044W                                          | PEX15         | YGR077C                 | PEX8          |
| YLL026W                                          | HSP104        | YLR357W                 | RSC2          |
| YDR480W                                          | DIG2          | YBL016W                 | FUS3          |
| YDR225W                                          | HTA1          | YNL206C                 | RTT106        |
| YBR127C                                          | VMA2          | YEL051W                 | VMA8          |
| YML012W                                          | ERV25         | YML067C                 | ERV41         |
| YOR304W                                          | ISW2          | YJR094C                 | IME1          |
| YCR084C                                          | TUP1          | YPR068C                 | HOS1          |
| YOR275C                                          | RIM20         | YHL027W                 | RIM101        |
| YCR084C                                          | TUP1          | YBR010W                 | HHT1          |
| YDR244W                                          | PEX5          | YDR142C                 | PEX7          |
| YOR231W                                          | MKK1          | YLR313C                 | SPH1          |
| YLR452C                                          | SST2          | YPR119W                 | CLB2          |
| YDL065C                                          | PEX19         | YPL112C                 | PEX25         |
| YLR148W                                          | PEP3          | YDL077C                 | VAM6          |
| YJL176C                                          | SWI3          | YBR289W                 | SNF5          |
| YJL122W                                          | ALB1          | YHR052W                 | CIC1          |
| YGR192C                                          | TDH3          | YPR119W                 | CLB2          |
| YJL128C                                          | PBS2          | YDL006W                 | PTC1          |
| YBR020W                                          | GAL1          | YCL011C                 | GBP2          |



| Predictions at threshold level 0.90 continued... |               |                         |               |
|--------------------------------------------------|---------------|-------------------------|---------------|
| Gene1 of predicted pair                          |               | Gene2 of predicted pair |               |
| Systematic Name                                  | Standard Name | Systematic Name         | Standard Name |
| YGR020C                                          | VMA7          | YDL185W                 | TFP1          |
| YER143W                                          | DDI1          | YOR327C                 | SNC2          |
| YNL215W                                          | IES2          | YPL129W                 | TAF14         |
| YOL151W                                          | GRE2          | YPR119W                 | CLB2          |
| YPL129W                                          | TAF14         | YDR073W                 | SNF11         |
| YJL058C                                          | BIT61         | YPR119W                 | CLB2          |
| YLR109W                                          | AHP1          | YIL008W                 | URM1          |
| YBL017C                                          | PEP1          | YJL029C                 | VPS53         |
| YPR018W                                          | RLF2          | YBR010W                 | HHT1          |
| YNL288W                                          | CAF40         | YPR072W                 | NOT5          |
| YNR052C                                          | POP2          | YGR134W                 | CAF130        |
| YLL010C                                          | PSR1          | YOR043W                 | WHI2          |
| YDR073W                                          | SNF11         | YKL109W                 | HAP4          |
| YFR010W                                          | UBP6          | YPR119W                 | CLB2          |
| YMR201C                                          | RAD14         | YJR052W                 | RAD7          |
| YLR303W                                          | MET17         | YLR377C                 | FBP1          |
| YLR148W                                          | PEP3          | YDR080W                 | VPS41         |
| YJL210W                                          | PEX2          | YGL153W                 | PEX14         |
| YFR024C-A                                        | LSB3          | YPL246C                 | RBD2          |
| YDR425W                                          | SNX41         | YJL036W                 | SNX4          |
| YJL124C                                          | LSM1          | YCR077C                 | PAT1          |
| YOL082W                                          | ATG19         | YKL103C                 | LAP4          |
| YJL089W                                          | SIP4          | YER027C                 | GAL83         |
| YLR337C                                          | VRP1          | YIL130W                 | ASG1          |
| YOR275C                                          | RIM20         | YPR173C                 | VPS4          |
| YHR193C                                          | EGD2          | YPL037C                 | EGD1          |
| YNL206C                                          | RTT106        | YNL031C                 | HHT2          |
| YER102W                                          | RPS8B         | YBL072C                 | RPS8A         |
| YLR248W                                          | RCK2          | YMR243C                 | ZRC1          |

| Predictions at threshold level 0.90 continued... |               |                         |               |
|--------------------------------------------------|---------------|-------------------------|---------------|
| Gene1 of predicted pair                          |               | Gene2 of predicted pair |               |
| Systematic Name                                  | Standard Name | Systematic Name         | Standard Name |
| YMR159C                                          | ATG16         | YPL149W                 | ATG5          |
| YBR171W                                          | SEC66         | YCL001W                 | RER1          |
| YBR020W                                          | GAL1          | YPL248C                 | GAL4          |
| YLL039C                                          | UBI4          | YDL190C                 | UFD2          |
| YDR171W                                          | HSP42         | YPR119W                 | CLB2          |
| YFR024C-A                                        | LSB3          | YHR114W                 | BZZ1          |
| YGR129W                                          | SYF2          | YPL213W                 | LEA1          |
| YOR270C                                          | VPH1          | YBR127C                 | VMA2          |
| YLR093C                                          | NYV1          | YOL018C                 | TLG2          |
| YPR036W                                          | VMA13         | YEL051W                 | VMA8          |
| YHR119W                                          | SET1          | YOL145C                 | CTR9          |
| YDR443C                                          | SSN2          | YGR134W                 | CAF130        |
| YJL060W                                          | BNA3          | YPR119W                 | CLB2          |
| YOL110W                                          | SHR5          | YLR246W                 | ERF2          |
| YMR026C                                          | PEX12         | YDR265W                 | PEX10         |
| YDR443C                                          | SSN2          | YER068W                 | MOT2          |
| YBL003C                                          | HTA2          | YBR009C                 | HHF1          |
| YBR111W-A                                        | SUS1          | YLR055C                 | SPT8          |
| YLR324W                                          | PEX30         | YBR168W                 | PEX32         |
| YLL022C                                          | HIF1          | YEL056W                 | HAT2          |
| YMR312W                                          | ELP6          | YHR187W                 | IKI1          |
| YDR244W                                          | PEX5          | YDL065C                 | PEX19         |
| YLR292C                                          | SEC72         | YLR301W                 | YLR301W       |
| YCR084C                                          | TUP1          | YNL167C                 | SKO1          |
| YGR104C                                          | SRB5          | YDL005C                 | MED2          |
| YBL085W                                          | BOI1          | YER158C                 | YER158C       |
| YBR111W-A                                        | SUS1          | YGR252W                 | GCN5          |
| YFR021W                                          | ATG18         | YLR094C                 | GIS3          |
| YPR101W                                          | SNT309        | YDR163W                 | CWC15         |

| Predictions at threshold level 0.90 continued... |               |                         |               |
|--------------------------------------------------|---------------|-------------------------|---------------|
| Gene1 of predicted pair                          |               | Gene2 of predicted pair |               |
| Systematic Name                                  | Standard Name | Systematic Name         | Standard Name |
| YBL003C                                          | HTA2          | YKR048C                 | NAP1          |
| YHR064C                                          | SSZ1          | YGR285C                 | ZUO1          |
| YKR028W                                          | SAP190        | YDL047W                 | SIT4          |
| YDL113C                                          | ATG20         | YLR191W                 | PEX13         |
| YNL076W                                          | MKS1          | YGL252C                 | RTG2          |
| YHR150W                                          | PEX28         | YBR168W                 | PEX32         |
| YDR329C                                          | PEX3          | YGL153W                 | PEX14         |
| YLR079W                                          | SIC1          | YGL019W                 | CKB1          |
| YNL107W                                          | YAF9          | YPR119W                 | CLB2          |
| YNR023W                                          | SNF12         | YDR073W                 | SNF11         |
| YDL185W                                          | TFP1          | YEL051W                 | VMA8          |
| YDL042C                                          | SIR2          | YML109W                 | ZDS2          |
| YCR077C                                          | PAT1          | YNL147W                 | LSM7          |
| YDL042C                                          | SIR2          | YDR440W                 | DOT1          |
| YCL067C                                          | HMLALPHA2     | YBR112C                 | CYC8          |
| YHL022C                                          | SPO11         | YGL213C                 | SKI8          |
| YBR041W                                          | FAT1          | YJL052W                 | TDH1          |
| YCR063W                                          | BUD31         | YPR101W                 | SNT309        |
| YNL243W                                          | SLA2          | YNL094W                 | APP1          |
| YDR195W                                          | REF2          | YAR014C                 | BUD14         |
| YBR173C                                          | UMP1          | YPR119W                 | CLB2          |
| YLR399C                                          | BDF1          | YBR010W                 | HHT1          |
| YNL206C                                          | RTT106        | YBR009C                 | HHF1          |
| YGR040W                                          | KSS1          | YBL016W                 | FUS3          |
| YCR020W-B                                        | HTL1          | YGR275W                 | RTT102        |
| YBR228W                                          | SLX1          | YLR135W                 | SLX4          |
| YNL180C                                          | RHO5          | YFL047W                 | RGD2          |
| YDR227W                                          | SIR4          | YBR010W                 | HHT1          |
| YLR148W                                          | PEP3          | YLR093C                 | NYV1          |

| Predictions at threshold level 0.90 continued... |               |                         |               |
|--------------------------------------------------|---------------|-------------------------|---------------|
| Gene1 of predicted pair                          |               | Gene2 of predicted pair |               |
| Systematic Name                                  | Standard Name | Systematic Name         | Standard Name |
| YJR010C-A                                        | SPC1          | YER019C-A               | SBH2          |
| YHR084W                                          | STE12         | YER109C                 | FLO8          |
| YOR197W                                          | MCA1          | YLL017W                 | YLL017W       |
| YGR104C                                          | SRB5          | YCR081W                 | SRB8          |
| YDR146C                                          | SWI5          | YDL155W                 | CLB3          |
| YBR009C                                          | HHF1          | YEL056W                 | HAT2          |
| YBR112C                                          | CYC8          | YGR252W                 | GCN5          |
| YNL093W                                          | YPT53         | YBR264C                 | YPT10         |
| YGR184C                                          | UBR1          | YPL248C                 | GAL4          |
| YOR351C                                          | MEK1          | YLR263W                 | RED1          |
| YPL018W                                          | CTF19         | YPR119W                 | CLB2          |
| YDR244W                                          | PEX5          | YGR077C                 | PEX8          |
| YGL115W                                          | SNF4          | YDR422C                 | SIP1          |
| YPR028W                                          | YOP1          | YGL198W                 | YIP4          |
| YFR030W                                          | MET10         | YGR262C                 | BUD32         |
| YDL065C                                          | PEX19         | YOL044W                 | PEX15         |
| YFR024C-A                                        | LSB3          | YPR119W                 | CLB2          |
| YJR052W                                          | RAD7          | YBR114W                 | RAD16         |
| YOR018W                                          | ROD1          | YLR248W                 | RCK2          |
| YML109W                                          | ZDS2          | YDR309C                 | GIC2          |
| YDR496C                                          | PUF6          | YHR052W                 | CIC1          |
| YML121W                                          | GTR1          | YKR007W                 | MEH1          |
| YDR225W                                          | HTA1          | YPL129W                 | TAF14         |
| YMR109W                                          | MYO5          | YER118C                 | SHO1          |
| YMR139W                                          | RIM11         | YDR207C                 | UME6          |
| YDR395W                                          | SXM1          | YER110C                 | KAP123        |
| YOR276W                                          | CAF20         | YOL045W                 | PSK2          |
| YPL046C                                          | ELC1          | YGL115W                 | SNF4          |
| YDR181C                                          | SAS4          | YMR127C                 | SAS2          |

| Predictions at threshold level 0.90 continued... |               |                         |               |
|--------------------------------------------------|---------------|-------------------------|---------------|
| Gene1 of predicted pair                          |               | Gene2 of predicted pair |               |
| Systematic Name                                  | Standard Name | Systematic Name         | Standard Name |
| YDR254W                                          | CHL4          | YPR119W                 | CLB2          |
| YER179W                                          | DMC1          | YBR073W                 | RDH54         |
| YBR289W                                          | SNF5          | YKL109W                 | HAP4          |
| YPL046C                                          | ELC1          | YOR028C                 | CIN5          |
| YBR009C                                          | HHF1          | YOR141C                 | ARP8          |
| YPL046C                                          | ELC1          | YER059W                 | PCL6          |
| YBL103C                                          | RTG3          | YOL108C                 | INO4          |
| YML095C                                          | RAD10         | YPR119W                 | CLB2          |
| YER114C                                          | BOI2          | YBL085W                 | BOI1          |
| YBR195C                                          | MSI1          | YNL183C                 | NPR1          |
| YDL185W                                          | TFP1          | YKL080W                 | VMA5          |
| YPL045W                                          | VPS16         | YAL002W                 | VPS8          |
| YBR112C                                          | CYC8          | YNL167C                 | SKO1          |
| YJL129C                                          | TRK1          | YGR262C                 | BUD32         |
| YNR052C                                          | POP2          | YJL141C                 | YAK1          |
| YDL160C                                          | DHH1          | YJL124C                 | LSM1          |
| YHR203C                                          | RPS4B         | YER102W                 | RPS8B         |
| YDR225W                                          | HTA1          | YDR448W                 | ADA2          |
| YEL009C                                          | GCN4          | YOL051W                 | GAL11         |
| YLR191W                                          | PEX13         | YAR042W                 | SWH1          |
| YHR016C                                          | YSC84         | YKR030W                 | GMH1          |
| YEL027W                                          | CUP5          | YDL185W                 | TFP1          |
| YBR264C                                          | YPT10         | YKR014C                 | YPT52         |
| YDR335W                                          | MSN5          | YKL068W                 | NUP100        |
| YOR039W                                          | CKB2          | YNL030W                 | HHF2          |
| YOR039W                                          | CKB2          | YLR399C                 | BDF1          |
| YGL078C                                          | DBP3          | YGR159C                 | NSR1          |
| YNL206C                                          | RTT106        | YBR010W                 | HHT1          |
| YBR017C                                          | KAP104        | YDR335W                 | MSN5          |

| Predictions at threshold level 0.90 continued... |               |                         |               |
|--------------------------------------------------|---------------|-------------------------|---------------|
| Gene1 of predicted pair                          |               | Gene2 of predicted pair |               |
| Systematic Name                                  | Standard Name | Systematic Name         | Standard Name |
| YDR080W                                          | VPS41         | YMR231W                 | PEP5          |
| YDR225W                                          | HTA1          | YPL248C                 | GAL4          |
| YBR200W                                          | BEM1          | YGR134W                 | CAF130        |
| YLR423C                                          | ATG17         | YPR185W                 | ATG13         |
| YGR209C                                          | TRX2          | YML028W                 | TSA1          |
| YLR102C                                          | APC9          | YDR260C                 | SWM1          |
| YBL021C                                          | HAP3          | YHR187W                 | IKI1          |
| YAL009W                                          | SPO7          | YMR165C                 | PAH1          |
| YCR063W                                          | BUD31         | YJR050W                 | ISY1          |
| YBL003C                                          | HTA2          | YGL241W                 | KAP114        |
| YER019C-A                                        | SBH2          | YGL226C-A               | OST5          |
| YPL050C                                          | MNN9          | YPR154W                 | PIN3          |
| YBR009C                                          | HHF1          | YKR048C                 | NAP1          |
| YJR092W                                          | BUD4          | YPR122W                 | AXL1          |
| YEL009C                                          | GCN4          | YDR448W                 | ADA2          |
| YEL009C                                          | GCN4          | YOL148C                 | SPT20         |
| YOR270C                                          | VPH1          | YEL027W                 | CUP5          |
| YEL059C-A                                        | SOM1          | YMR035W                 | IMP2          |
| YBR133C                                          | HSL7          | YJL187C                 | SWE1          |
| YOR270C                                          | VPH1          | YMR054W                 | STV1          |
| YBR128C                                          | ATG14         | YPL120W                 | VPS30         |
| YDL160C                                          | DHH1          | YCR077C                 | PAT1          |
| YMR194W                                          | RPL36A        | YGL246C                 | RAI1          |
| YNL135C                                          | FPR1          | YNL023C                 | FAP1          |
| YLR432W                                          | IMD3          | YML056C                 | IMD4          |
| YLL026W                                          | HSP104        | YGR275W                 | RTT102        |
| YMR127C                                          | SAS2          | YOR213C                 | SAS5          |
| YJL176C                                          | SWI3          | YPL129W                 | TAF14         |
| YLR043C                                          | TRX1          | YML028W                 | TSA1          |

| Predictions at threshold level 0.90 continued... |               |                         |               |
|--------------------------------------------------|---------------|-------------------------|---------------|
| Gene1 of predicted pair                          |               | Gene2 of predicted pair |               |
| Systematic Name                                  | Standard Name | Systematic Name         | Standard Name |
| YOR078W                                          | BUD21         | YHR203C                 | RPS4B         |
| YOR078W                                          | BUD21         | YGR100W                 | MDR1          |
| YDR264C                                          | AKR1          | YKL178C                 | STE3          |
| YNL214W                                          | PEX17         | YGR077C                 | PEX8          |
| YOR178C                                          | GAC1          | YLR258W                 | GSY2          |
| YHR084W                                          | STE12         | YPL042C                 | SSN3          |
| YML100W                                          | TSL1          | YMR261C                 | TPS3          |
| YEL009C                                          | GCN4          | YKL109W                 | HAP4          |
| YBL003C                                          | HTA2          | YNL031C                 | HHT2          |
| YGL066W                                          | SGF73         | YOL148C                 | SPT20         |
| YML001W                                          | YPT7          | YGL198W                 | YIP4          |
| YBR036C                                          | CSG2          | YBR161W                 | CSH1          |
| YCL010C                                          | SGF29         | YBR111W-A               | SUS1          |
| YHR052W                                          | CIC1          | YOL041C                 | NOP12         |
| YDR192C                                          | NUP42         | YDR101C                 | ARX1          |
| YGR040W                                          | KSS1          | YHR084W                 | STE12         |
| YNL253W                                          | TEX1          | YNL004W                 | HRB1          |
| YJL210W                                          | PEX2          | YDL065C                 | PEX19         |
| YCL037C                                          | SRO9          | YOL045W                 | PSK2          |
| YDR142C                                          | PEX7          | YNL214W                 | PEX17         |
| YNL314W                                          | DAL82         | YIR023W                 | DAL81         |
| YPL042C                                          | SSN3          | YMR037C                 | MSN2          |
| YML095C                                          | RAD10         | YMR201C                 | RAD14         |
| YOR358W                                          | HAP5          | YKL109W                 | HAP4          |
| YML001W                                          | YPT7          | YMR231W                 | PEP5          |
| YLL039C                                          | UBI4          | YER143W                 | DDI1          |
| YJL128C                                          | PBS2          | YCR073C                 | SSK22         |
| YHR052W                                          | CIC1          | YDR312W                 | SSF2          |
| YNL229C                                          | URE2          | YER040W                 | GLN3          |

| Predictions at threshold level 0.90 continued... |               |                         |               |
|--------------------------------------------------|---------------|-------------------------|---------------|
| Gene1 of predicted pair                          |               | Gene2 of predicted pair |               |
| Systematic Name                                  | Standard Name | Systematic Name         | Standard Name |
| YDL216C                                          | RRI1          | YOL117W                 | RRI2          |
| YDR392W                                          | SPT3          | YBR111W-A               | SUS1          |
| YNR049C                                          | MSO1          | YPR032W                 | SRO7          |
| YOL062C                                          | APM4          | YPL259C                 | APM1          |
| YLR181C                                          | VTA1          | YPR173C                 | VPS4          |
| YNR023W                                          | SNF12         | YER161C                 | SPT2          |
| YHL031C                                          | GOS1          | YOR036W                 | PEP12         |
| YBR126C                                          | TPS1          | YFL033C                 | RIM15         |
| YOL117W                                          | RRI2          | YJR084W                 | CSN12         |
| YDR110W                                          | FOB1          | YBR119W                 | MUD1          |
| YOL051W                                          | GAL11         | YCR084C                 | TUP1          |
| YPL129W                                          | TAF14         | YEL044W                 | IES6          |
| YBR111W-A                                        | SUS1          | YPL248C                 | GAL4          |
| YPL121C                                          | MEI5          | YHR079C-A               | SAE3          |
| YJR125C                                          | ENT3          | YNR006W                 | VPS27         |
| YFR043C                                          | IRC6          | YLR248W                 | RCK2          |
| YFL003C                                          | MSH4          | YDL154W                 | MSH5          |
| YDR146C                                          | SWI5          | YOL051W                 | GAL11         |
| YCR084C                                          | TUP1          | YKL181W                 | PRS1          |
| YDR507C                                          | GIN4          | YBR267W                 | REI1          |
| YER158C                                          | YER158C       | YAR014C                 | BUD14         |
| YPL046C                                          | ELC1          | YJR052W                 | RAD7          |
| YHR061C                                          | GIC1          | YCR086W                 | CSM1          |
| YLR324W                                          | PEX30         | YMR204C                 | INP1          |
| YER143W                                          | DDI1          | YOL018C                 | TLG2          |
| YGR188C                                          | BUB1          | YPR119W                 | CLB2          |
| YKL002W                                          | DID4          | YKL041W                 | VPS24         |
| YDR176W                                          | NGG1          | YPL248C                 | GAL4          |
| YBR112C                                          | CYC8          | YCR084C                 | TUP1          |



| Predictions at threshold level 0.90 continued... |               |                         |               |
|--------------------------------------------------|---------------|-------------------------|---------------|
| Gene1 of predicted pair                          |               | Gene2 of predicted pair |               |
| Systematic Name                                  | Standard Name | Systematic Name         | Standard Name |
| YHR157W                                          | REC104        | YHL022C                 | SPO11         |
| YHR084W                                          | STE12         | YBL016W                 | FUS3          |
| YDL101C                                          | DUN1          | YBL088C                 | TEL1          |
| YLR170C                                          | APS1          | YHL019C                 | APM2          |
| YDR329C                                          | PEX3          | YDR142C                 | PEX7          |
| YLR064W                                          | YLR064W       | YHR114W                 | BZZ1          |
| YLR313C                                          | SPH1          | YLR362W                 | STE11         |
| YDR176W                                          | NGG1          | YOR023C                 | AHC1          |
| YBR031W                                          | RPL4A         | YOR078W                 | BUD21         |
| YER087C-B                                        | SBH1          | YJR010C-A               | SPC1          |
| YER011W                                          | TIR1          | YPL178W                 | CBC2          |
| YER143W                                          | DDI1          | YNR049C                 | MSO1          |
| YAR014C                                          | BUD14         | YPR119W                 | CLB2          |
| YLR109W                                          | AHP1          | YER042W                 | MXR1          |
| YHR052W                                          | CIC1          | YLR150W                 | STM1          |
| YHR160C                                          | PEX18         | YLR191W                 | PEX13         |
| YOL044W                                          | PEX15         | YAL055W                 | PEX22         |
| YPR029C                                          | APL4          | YJR125C                 | ENT3          |
| YBL071W-A                                        | KTI11         | YIL103W                 | DPH1          |
| YER114C                                          | BOI2          | YBR200W                 | BEM1          |
| YJL176C                                          | SWI3          | YGR275W                 | RTT102        |
| YDR443C                                          | SSN2          | YPL042C                 | SSN3          |
| YDR295C                                          | HDA2          | YDR318W                 | MCM21         |
| YDR264C                                          | AKR1          | YJR086W                 | STE18         |
| YHL031C                                          | GOS1          | YEL036C                 | ANP1          |
| YDR329C                                          | PEX3          | YDL065C                 | PEX19         |
| YLR353W                                          | BUD8          | YOR301W                 | RAX1          |
| YNL031C                                          | HHT2          | YEL056W                 | HAT2          |
| YBR111W-A                                        | SUS1          | YOL148C                 | SPT20         |

| Predictions at threshold level 0.90 continued... |               |                         |               |
|--------------------------------------------------|---------------|-------------------------|---------------|
| Gene1 of predicted pair                          |               | Gene2 of predicted pair |               |
| Systematic Name                                  | Standard Name | Systematic Name         | Standard Name |
| YKR069W                                          | MET1          | YKL129C                 | MYO3          |
| YOR253W                                          | NAT5          | YHR013C                 | ARD1          |
| YGL066W                                          | SGF73         | YGR252W                 | GCN5          |
| YDR146C                                          | SWI5          | YFR034C                 | PHO4          |
| YHR052W                                          | CIC1          | YGL246C                 | RAI1          |
| YCR065W                                          | HCM1          | YPR119W                 | CLB2          |
| YPL140C                                          | MKK2          | YJL095W                 | BCK1          |
| YNL206C                                          | RTT106        | YGR252W                 | GCN5          |
| YLR148W                                          | PEP3          | YAL002W                 | VPS8          |
| YDR477W                                          | SNF1          | YBR010W                 | HHT1          |
| YBR217W                                          | ATG12         | YLL042C                 | ATG10         |
| YBR020W                                          | GAL1          | YNL004W                 | HRB1          |
| YAL024C                                          | LTE1          | YHR158C                 | KEL1          |
| YCR084C                                          | TUP1          | YNL236W                 | SIN4          |
| YHR144C                                          | DCD1          | YMR201C                 | RAD14         |
| YML115C                                          | VAN1          | YPR119W                 | CLB2          |
| YML109W                                          | ZDS2          | YHR061C                 | GIC1          |
| YOR005C                                          | DNL4          | YGL090W                 | LIF1          |
| YHR171W                                          | ATG7          | YLL042C                 | ATG10         |
| YIR009W                                          | MSL1          | YPR119W                 | CLB2          |
| YGL226C-A                                        | OST5          | YML019W                 | OST6          |
| YHR052W                                          | CIC1          | YKL009W                 | MRT4          |
| YDR135C                                          | YCF1          | YGL181W                 | GTS1          |
| YDR318W                                          | MCM21         | YPR119W                 | CLB2          |
| YML062C                                          | MFT1          | YCL011C                 | GBP2          |
| YCL010C                                          | SGF29         | YPL248C                 | GAL4          |
| YDR103W                                          | STE5          | YJL157C                 | FAR1          |
| YDL042C                                          | SIR2          | YDR110W                 | FOB1          |
| YDL239C                                          | ADY3          | YOR177C                 | MPC54         |

| Predictions at threshold level 0.90 continued... |               |                         |               |
|--------------------------------------------------|---------------|-------------------------|---------------|
| Gene1 of predicted pair                          |               | Gene2 of predicted pair |               |
| Systematic Name                                  | Standard Name | Systematic Name         | Standard Name |
| YHR171W                                          | ATG7          | YPL149W                 | ATG5          |
| YDR103W                                          | STE5          | YBL016W                 | FUS3          |
| YLR138W                                          | NHA1          | YML132W                 | COS3          |
| YJL124C                                          | LSM1          | YPR119W                 | CLB2          |
| YNL206C                                          | RTT106        | YML102W                 | CAC2          |
| YPL129W                                          | TAF14         | YOR189W                 | IES4          |
| YDR378C                                          | LSM6          | YOR320C                 | GNT1          |
| YBR216C                                          | YBP1          | YML007W                 | YAP1          |
| YPL115C                                          | BEM3          | YMR273C                 | ZDS1          |
| YBL078C                                          | ATG8          | YHL031C                 | GOS1          |
| YPR066W                                          | UBA3          | YDR139C                 | RUB1          |
| YPL249C-A                                        | RPL36B        | YCR009C                 | RVS161        |
| YMR026C                                          | PEX12         | YDR142C                 | PEX7          |
| YDL082W                                          | RPL13A        | YGL246C                 | RAI1          |
| YBL071W-A                                        | KTI11         | YKL191W                 | DPH2          |
| YNL090W                                          | RHO2          | YDL240W                 | LRG1          |
| YGR200C                                          | ELP2          | YBL071W-A               | KTI11         |
| YCR097W                                          | HMRA1         | YCR039C                 | MATALPHA2     |
| YER068W                                          | MOT2          | YGR134W                 | CAF130        |
| YDR103W                                          | STE5          | YCL032W                 | STE50         |
| YFL048C                                          | EMP47         | YEL036C                 | ANP1          |
| YAL014C                                          | SYN8          | YOR036W                 | PEP12         |
| YPR072W                                          | NOT5          | YGR134W                 | CAF130        |
| YBR065C                                          | ECM2          | YBR188C                 | NTC20         |
| YDL065C                                          | PEX19         | YAL055W                 | PEX22         |
| YLR447C                                          | VMA6          | YEL051W                 | VMA8          |
| YOL062C                                          | APM4          | YJR005W                 | APL1          |
| YMR029C                                          | FAR8          | YMR052W                 | FAR3          |
| YNL236W                                          | SIN4          | YGL151W                 | NUT1          |

| Predictions at threshold level 0.90 continued... |               |                         |               |
|--------------------------------------------------|---------------|-------------------------|---------------|
| Gene1 of predicted pair                          |               | Gene2 of predicted pair |               |
| Systematic Name                                  | Standard Name | Systematic Name         | Standard Name |
| YDR225W                                          | HTA1          | YDR176W                 | NGG1          |
| YHR119W                                          | SET1          | YDR469W                 | SDC1          |
| YGL237C                                          | HAP2          | YKL109W                 | HAP4          |
| YNL214W                                          | PEX17         | YAL055W                 | PEX22         |
| YEL009C                                          | GCN4          | YLR399C                 | BDF1          |
| YGR133W                                          | PEX4          | YAL055W                 | PEX22         |
| YJR135C                                          | MCM22         | YPR119W                 | CLB2          |
| YHR119W                                          | SET1          | YLR288C                 | MEC3          |
| YMR231W                                          | PEP5          | YDL077C                 | VAM6          |
| YNL288W                                          | CAF40         | YGR134W                 | CAF130        |
| YJL210W                                          | PEX2          | YGR077C                 | PEX8          |
| YNL025C                                          | SSN8          | YBL075C                 | SSA3          |
| YDR448W                                          | ADA2          | YBL003C                 | HTA2          |
| YHR086W                                          | NAM8          | YPR101W                 | SNT309        |
| YDR260C                                          | SWM1          | YPR119W                 | CLB2          |
| YKR014C                                          | YPT52         | YPR028W                 | YOP1          |
| YDR477W                                          | SNF1          | YPL248C                 | GAL4          |
| YMR026C                                          | PEX12         | YOL044W                 | PEX15         |
| YDR192C                                          | NUP42         | YBR017C                 | KAP104        |
| YNL288W                                          | CAF40         | YNR052C                 | POP2          |
| YDR329C                                          | PEX3          | YOL147C                 | PEX11         |
| YIR009W                                          | MSL1          | YDR184C                 | ATC1          |
| YLR377C                                          | FBP1          | YNR065C                 | YNR065C       |
| YMR055C                                          | BUB2          | YPR119W                 | CLB2          |
| YNL106C                                          | INP52         | YCR088W                 | ABP1          |
| YPL086C                                          | ELP3          | YHR187W                 | IKI1          |
| YDR443C                                          | SSN2          | YFL028C                 | CAF16         |
| YOR140W                                          | SFL1          | YNL236W                 | SIN4          |
| YLR191W                                          | PEX13         | YOL044W                 | PEX15         |

| Predictions at threshold level 0.90 continued... |               |                         |               |
|--------------------------------------------------|---------------|-------------------------|---------------|
| Gene1 of predicted pair                          |               | Gene2 of predicted pair |               |
| Systematic Name                                  | Standard Name | Systematic Name         | Standard Name |
| YAR042W                                          | SWH1          | YHR195W                 | NVJ1          |
| YML095C                                          | RAD10         | YOL090W                 | MSH2          |
| YEL009C                                          | GCN4          | YDR176W                 | NGG1          |
| YGR252W                                          | GCN5          | YBL002W                 | HTB2          |
| YPR007C                                          | REC8          | YPR119W                 | CLB2          |
| YMR202W                                          | ERG2          | YER044C                 | ERG28         |
| YNL288W                                          | CAF40         | YPL042C                 | SSN3          |
| YBR260C                                          | RGD1          | YNL090W                 | RHO2          |
| YBL078C                                          | ATG8          | YNL223W                 | ATG4          |
| YLR385C                                          | SWC7          | YLR399C                 | BDF1          |
| YCR092C                                          | MSH3          | YOL090W                 | MSH2          |
| YPL161C                                          | BEM4          | YHR061C                 | GIC1          |
| YGR252W                                          | GCN5          | YGL252C                 | RTG2          |
| YDR103W                                          | STE5          | YOR212W                 | STE4          |
| YMR025W                                          | CSI1          | YJR084W                 | CSN12         |
| YOR230W                                          | WTM1          | YOR229W                 | WTM2          |
| YGR173W                                          | RBG2          | YDR152W                 | GIR2          |
| YJR035W                                          | RAD26         | YKL054C                 | DEF1          |
| YEL013W                                          | VAC8          | YPR185W                 | ATG13         |
| YOL044W                                          | PEX15         | YNL214W                 | PEX17         |
| YPR036W                                          | VMA13         | YER005W                 | YND1          |
| YOR080W                                          | DIA2          | YPR119W                 | CLB2          |
| YGR159C                                          | NSR1          | YLR410W                 | VIP1          |
| YIR025W                                          | MND2          | YFR036W                 | CDC26         |
| YDR176W                                          | NGG1          | YCL010C                 | SGF29         |
| YLR396C                                          | VPS33         | YAL002W                 | VPS8          |
| YLR043C                                          | TRX1          | YDR080W                 | VPS41         |
| YDL239C                                          | ADY3          | YNL225C                 | CNM67         |
| YML062C                                          | MFT1          | YNL004W                 | HRB1          |

| Predictions at threshold level 0.90 continued... |               |                         |               |
|--------------------------------------------------|---------------|-------------------------|---------------|
| Gene1 of predicted pair                          |               | Gene2 of predicted pair |               |
| Systematic Name                                  | Standard Name | Systematic Name         | Standard Name |
| YOR212W                                          | STE4          | YCL032W                 | STE50         |
| YLR381W                                          | CTF3          | YPR119W                 | CLB2          |
| YPL037C                                          | EGD1          | YDR252W                 | BTT1          |
| YGR239C                                          | PEX21         | YDR142C                 | PEX7          |
| YBR112C                                          | CYC8          | YGL025C                 | PGD1          |
| YLR238W                                          | FAR10         | YMR052W                 | FAR3          |
| YDR507C                                          | GIN4          | YNL078W                 | NIS1          |
| YMR026C                                          | PEX12         | YLR191W                 | PEX13         |
| YLL039C                                          | UBI4          | YMR276W                 | DSK2          |
| YHR052W                                          | CIC1          | YGL189C                 | RPS26A        |
| YJL124C                                          | LSM1          | YNL147W                 | LSM7          |
| YGR004W                                          | PEX31         | YLR324W                 | PEX30         |
| YLR079W                                          | SIC1          | YOR039W                 | CKB2          |
| YDR295C                                          | HDA2          | YPR179C                 | HDA3          |
| YER044C-A                                        | MEI4          | YMR133W                 | REC114        |
| YDR142C                                          | PEX7          | YGL153W                 | PEX14         |
| YBR111W-A                                        | SUS1          | YBR010W                 | HHT1          |
| YGR129W                                          | SYF2          | YCR063W                 | BUD31         |
| YMR243C                                          | ZRC1          | YGL158W                 | RCK1          |
| YOL018C                                          | TLG2          | YDL047W                 | SIT4          |
| YEL009C                                          | GCN4          | YOR290C                 | SNF2          |
| YNL047C                                          | SLM2          | YJL058C                 | BIT61         |
| YFL003C                                          | MSH4          | YGL249W                 | ZIP2          |
| YER110C                                          | KAP123        | YBR009C                 | HHF1          |
| YJL210W                                          | PEX2          | YDR244W                 | PEX5          |
| YOR332W                                          | VMA4          | YMR054W                 | STV1          |
| YJL176C                                          | SWI3          | YLR357W                 | RSC2          |
| YDR080W                                          | VPS41         | YEL013W                 | VAC8          |
| YKL092C                                          | BUD2          | YGR152C                 | RSR1          |

| Predictions at threshold level 0.90 continued... |               |                         |               |
|--------------------------------------------------|---------------|-------------------------|---------------|
| Gene1 of predicted pair                          |               | Gene2 of predicted pair |               |
| Systematic Name                                  | Standard Name | Systematic Name         | Standard Name |
| YAL051W                                          | OAF1          | YOR363C                 | PIP2          |
| YNL025C                                          | SSN8          | YPL248C                 | GAL4          |
| YBR131W                                          | CCZ1          | YML001W                 | YPT7          |
| YML001W                                          | YPT7          | YPL045W                 | VPS16         |
| YLR191W                                          | PEX13         | YDR142C                 | PEX7          |
| YLR433C                                          | CNA1          | YIR009W                 | MSL1          |
| YGL115W                                          | SNF4          | YER027C                 | GAL83         |
| YPL129W                                          | TAF14         | YNR023W                 | SNF12         |
| YPL001W                                          | HAT1          | YNL031C                 | HHT2          |
| YJL106W                                          | IME2          | YJR094C                 | IME1          |
| YOR005C                                          | DNL4          | YCR014C                 | POL4          |
| YFR024C-A                                        | LSB3          | YKR030W                 | GMH1          |
| YPL042C                                          | SSN3          | YJL089W                 | SIP4          |
| YEL009C                                          | GCN4          | YOR298C-A               | MBF1          |
| YLR370C                                          | ARC18         | YPR119W                 | CLB2          |
| YNL259C                                          | ATX1          | YDR270W                 | CCC2          |
| YPL246C                                          | RBD2          | YHR016C                 | YSC84         |
| YDR165W                                          | TRM82         | YDL201W                 | TRM8          |
| YKL130C                                          | SHE2          | YKL185W                 | ASH1          |
| YDL213C                                          | NOP6          | YOR078W                 | BUD21         |
| YBR138C                                          | YBR138C       | YGR223C                 | HSV2          |
| YBR127C                                          | VMA2          | YMR054W                 | STV1          |
| YNL004W                                          | HRB1          | YCL011C                 | GBP2          |
| YDR092W                                          | UBC13         | YLR032W                 | RAD5          |
| YMR273C                                          | ZDS1          | YHR061C                 | GIC1          |
| YDR123C                                          | INO2          | YPL248C                 | GAL4          |
| YDR142C                                          | PEX7          | YDL065C                 | PEX19         |
| YDR244W                                          | PEX5          | YOL044W                 | PEX15         |
| YCL010C                                          | SGF29         | YGR252W                 | GCN5          |

| Predictions at threshold level 0.90 continued... |               |                         |               |
|--------------------------------------------------|---------------|-------------------------|---------------|
| Gene1 of predicted pair                          |               | Gene2 of predicted pair |               |
| Systematic Name                                  | Standard Name | Systematic Name         | Standard Name |
| YDL155W                                          | CLB3          | YLR131C                 | ACE2          |
| YDR101C                                          | ARX1          | YKL068W                 | NUP100        |
| YHR185C                                          | PFS1          | YIL007C                 | NAS2          |
| YDL005C                                          | MED2          | YCR084C                 | TUP1          |
| YFL003C                                          | MSH4          | YLR394W                 | CST9          |
| YCR002C                                          | CDC10         | YDR507C                 | GIN4          |
| YLR181C                                          | VTA1          | YKR035W-A               | DID2          |
| YPR167C                                          | MET16         | YML028W                 | TSA1          |
| YLR191W                                          | PEX13         | YDR244W                 | PEX5          |
| YPL129W                                          | TAF14         | YHL025W                 | SNF6          |
| YGR241C                                          | YAP1802       | YBL047C                 | EDE1          |
| YNR064C                                          | YNR064C       | YOL108C                 | INO4          |
| YMR091C                                          | NPL6          | YLR357W                 | RSC2          |
| YOL013C                                          | HRD1          | YMR022W                 | UBC7          |
| YJR021C                                          | REC107        | YMR133W                 | REC114        |
| YFR021W                                          | ATG18         | YPR119W                 | CLB2          |
| YBL078C                                          | ATG8          | YNR007C                 | ATG3          |
| YFR024C-A                                        | LSB3          | YGR268C                 | HUA1          |
| YER087C-B                                        | SBH1          | YGL226C-A               | OST5          |
| YBR112C                                          | CYC8          | YPR068C                 | HOS1          |
| YNL253W                                          | TEX1          | YHR167W                 | THP2          |
| YNL333W                                          | SNZ2          | YMR096W                 | SNZ1          |
| YDR285W                                          | ZIP1          | YLR394W                 | CST9          |
| YJL122W                                          | ALB1          | YDR101C                 | ARX1          |
| YJR094C                                          | IME1          | YDR207C                 | UME6          |
| YIL132C                                          | CSM2          | YHL006C                 | SHU1          |
| YOR270C                                          | VPH1          | YGR020C                 | VMA7          |
| YCL027W                                          | FUS1          | YPR119W                 | CLB2          |
| YGR104C                                          | SRB5          | YPL129W                 | TAF14         |



| Predictions at threshold level 0.90 continued... |               |                         |               |
|--------------------------------------------------|---------------|-------------------------|---------------|
| Gene1 of predicted pair                          |               | Gene2 of predicted pair |               |
| Systematic Name                                  | Standard Name | Systematic Name         | Standard Name |
| YMR042W                                          | ARG80         | YDR207C                 | UME6          |
| YLR043C                                          | TRX1          | YOR106W                 | VAM3          |
| YMR026C                                          | PEX12         | YNL214W                 | PEX17         |
| YBR188C                                          | NTC20         | YPL213W                 | LEA1          |
| YDL190C                                          | UFD2          | YMR276W                 | DSK2          |
| YCR038C                                          | BUD5          | YPR122W                 | AXL1          |
| YPL129W                                          | TAF14         | YBR009C                 | HHF1          |
| YNL145W                                          | MFA2          | YCR077C                 | PAT1          |
| YDR101C                                          | ARX1          | YHR052W                 | CIC1          |
| YNL078W                                          | NIS1          | YCL024W                 | KCC4          |
| YFR024C-A                                        | LSB3          | YHR016C                 | YSC84         |
| YLR306W                                          | UBC12         | YDR139C                 | RUB1          |
| YDR176W                                          | NGG1          | YGL066W                 | SGF73         |
| YER044C-A                                        | MEI4          | YHR086W                 | NAM8          |
| YPR101W                                          | SNT309        | YDR378C                 | LSM6          |
| YGR040W                                          | KSS1          | YDR103W                 | STE5          |
| YLL039C                                          | UBI4          | YNR006W                 | VPS27         |
| YBL078C                                          | ATG8          | YGL212W                 | VAM7          |
| YJL151C                                          | SNA3          | YLR064W                 | YLR064W       |
| YPR036W                                          | VMA13         | YMR054W                 | STV1          |
| YNL094W                                          | APP1          | YCR088W                 | ABP1          |
| YDR265W                                          | PEX10         | YOL044W                 | PEX15         |
| YNL025C                                          | SSN8          | YDR477W                 | SNF1          |
| YER087C-B                                        | SBH1          | YML019W                 | OST6          |
| YBR289W                                          | SNF5          | YOR038C                 | HIR2          |
| YBR041W                                          | FAT1          | YKR046C                 | PET10         |
| YBR273C                                          | UBX7          | YJL048C                 | UBX6          |
| YJL176C                                          | SWI3          | YOR290C                 | SNF2          |
| YHR056C                                          | RSC30         | YLR357W                 | RSC2          |

| Predictions at threshold level 0.90 continued... |               |                         |               |
|--------------------------------------------------|---------------|-------------------------|---------------|
| Gene1 of predicted pair                          |               | Gene2 of predicted pair |               |
| Systematic Name                                  | Standard Name | Systematic Name         | Standard Name |
| YDR142C                                          | PEX7          | YLL061W                 | MMP1          |
| YCR081W                                          | SRB8          | YGL025C                 | PGD1          |
| YGR249W                                          | MGA1          | YPL203W                 | TPK2          |
| YFR024C-A                                        | LSB3          | YOR284W                 | HUA2          |
| YHR086W                                          | NAM8          | YJR021C                 | REC107        |
| YDR440W                                          | DOT1          | YBR010W                 | HHT1          |
| YHR119W                                          | SET1          | YBR258C                 | SHG1          |
| YGL246C                                          | RAI1          | YDR025W                 | RPS11A        |
| YBL046W                                          | PSY4          | YPR040W                 | TIP41         |
| YGL180W                                          | ATG1          | YPR185W                 | ATG13         |
| YPR049C                                          | ATG11         | YGL180W                 | ATG1          |
| YDL227C                                          | HO            | YLL013C                 | PUF3          |
| YPR101W                                          | SNT309        | YPL213W                 | LEA1          |
| YOL062C                                          | APM4          | YJR058C                 | APS2          |
| YHR052W                                          | CIC1          | YIL133C                 | RPL16A        |
| YBR217W                                          | ATG12         | YPL149W                 | ATG5          |
| YPR167C                                          | MET16         | YGR209C                 | TRX2          |
| YNL139C                                          | RLR1          | YNL004W                 | HRB1          |
| YLR093C                                          | NYV1          | YEL036C                 | ANP1          |
| YPL140C                                          | MKK2          | YLR313C                 | SPH1          |
| YJR140C                                          | HIR3          | YFR021W                 | ATG18         |
| YDR181C                                          | SAS4          | YOR213C                 | SAS5          |
| YEL009C                                          | GCN4          | YDL005C                 | MED2          |
| YBR107C                                          | IML3          | YPR119W                 | CLB2          |
| YGL060W                                          | YBP2          | YML007W                 | YAP1          |
| YOR076C                                          | SKI7          | YOR001W                 | RRP6          |
| YDL106C                                          | PHO2          | YDR146C                 | SWI5          |
| YDR448W                                          | ADA2          | YBR111W-A               | SUS1          |
| YDL216C                                          | RRI1          | YJR084W                 | CSN12         |

| Predictions at threshold level 0.90 continued... |               |                         |               |
|--------------------------------------------------|---------------|-------------------------|---------------|
| Gene1 of predicted pair                          |               | Gene2 of predicted pair |               |
| Systematic Name                                  | Standard Name | Systematic Name         | Standard Name |
| YNR052C                                          | POP2          | YNL206C                 | RTT106        |
| YPL115C                                          | BEM3          | YHR061C                 | GIC1          |
| YDR448W                                          | ADA2          | YBR010W                 | HHT1          |
| YHL025W                                          | SNF6          | YER161C                 | SPT2          |
| YOR043W                                          | WHI2          | YMR037C                 | MSN2          |
| YKL130C                                          | SHE2          | YBR130C                 | SHE3          |
| YEL015W                                          | EDC3          | YBL066C                 | SEF1          |
| YKL197C                                          | PEX1          | YNL329C                 | PEX6          |
| YDL184C                                          | RPL41A        | YJL124C                 | LSM1          |
| YER042W                                          | MXR1          | YML028W                 | TSA1          |
| YPR154W                                          | PIN3          | YPL249C                 | GYP5          |
| YEL009C                                          | GCN4          | YHL025W                 | SNF6          |
| YOR270C                                          | VPH1          | YDL185W                 | TFP1          |
| YHR016C                                          | YSC84         | YHR114W                 | BZZ1          |
| YPL246C                                          | RBD2          | YHR114W                 | BZZ1          |
| YGR056W                                          | RSC1          | YHR056C                 | RSC30         |
| YBL008W                                          | HIR1          | YOR290C                 | SNF2          |
| YHL031C                                          | GOS1          | YLR093C                 | NYV1          |
| YDL116W                                          | NUP84         | YBR017C                 | KAP104        |
| YBL016W                                          | FUS3          | YBR083W                 | TEC1          |
| YOR332W                                          | VMA4          | YDR202C                 | RAV2          |
| YDR448W                                          | ADA2          | YGL252C                 | RTG2          |
| YGL158W                                          | RCK1          | YPL058C                 | PDR12         |
| YLR384C                                          | IKI3          | YBL071W-A               | KTI11         |
| YOR371C                                          | GPB1          | YGL121C                 | GPG1          |
| YDR296W                                          | MHR1          | YPL248C                 | GAL4          |
| YEL009C                                          | GCN4          | YPL129W                 | TAF14         |
| YER109C                                          | FLO8          | YBR083W                 | TEC1          |
| YIL072W                                          | HOP1          | YLR263W                 | RED1          |

| Predictions at threshold level 0.90 continued... |               |                         |               |
|--------------------------------------------------|---------------|-------------------------|---------------|
| Gene1 of predicted pair                          |               | Gene2 of predicted pair |               |
| Systematic Name                                  | Standard Name | Systematic Name         | Standard Name |
| YDR192C                                          | NUP42         | YMR255W                 | GFD1          |
| YNL329C                                          | PEX6          | YOL044W                 | PEX15         |
| YOR078W                                          | BUD21         | YHR052W                 | CIC1          |
| YBL016W                                          | FUS3          | YLR452C                 | SST2          |
| YPL019C                                          | VTC3          | YFL004W                 | VTC2          |
| YHR195W                                          | NVJ1          | YEL013W                 | VAC8          |
| YGL090W                                          | LIF1          | YCR014C                 | POL4          |
| YDR142C                                          | PEX7          | YOL044W                 | PEX15         |
| YPL125W                                          | KAP120        | YKL068W                 | NUP100        |
| YLR191W                                          | PEX13         | YNL214W                 | PEX17         |
| YGR252W                                          | GCN5          | YKR048C                 | NAP1          |
| YHR187W                                          | IKI1          | YPL101W                 | ELP4          |
| YPL129W                                          | TAF14         | YGL025C                 | PGD1          |
| YKL020C                                          | SPT23         | YOR124C                 | UBP2          |
| YIL050W                                          | PCL7          | YGR233C                 | PHO81         |
| YOL091W                                          | SPO21         | YNL225C                 | CNM67         |
| YDL080C                                          | THI3          | YBR240C                 | THI2          |
| YEL054C                                          | RPL12A        | YGL246C                 | RAI1          |
| YPL086C                                          | ELP3          | YBL071W-A               | KTI11         |
| YPL050C                                          | MNN9          | YJL183W                 | MNN11         |
| YMR026C                                          | PEX12         | YDR244W                 | PEX5          |
| YOR127W                                          | RGA1          | YDR309C                 | GIC2          |
| YIR017C                                          | MET28         | YJR060W                 | CBF1          |
| YKR084C                                          | HBS1          | YNL001W                 | DOM34         |
| YNL025C                                          | SSN8          | YGL025C                 | PGD1          |
| YJR091C                                          | JSN1          | YLR370C                 | ARC18         |
| YLR396C                                          | VPS33         | YGL124C                 | MON1          |
| YIL140W                                          | AXL2          | YGL054C                 | ERV14         |
| YBL106C                                          | SRO77         | YLR423C                 | ATG17         |

| Predictions at threshold level 0.90 continued... |               |                         |               |
|--------------------------------------------------|---------------|-------------------------|---------------|
| Gene1 of predicted pair                          |               | Gene2 of predicted pair |               |
| Systematic Name                                  | Standard Name | Systematic Name         | Standard Name |
| YGL153W                                          | PEX14         | YGR077C                 | PEX8          |
| YHL019C                                          | APM2          | YKL135C                 | APL2          |
| YJR083C                                          | ACF4          | YDR507C                 | GIN4          |
| YDR001C                                          | NTH1          | YPR119W                 | CLB2          |
| YMR223W                                          | UBP8          | YBR111W-A               | SUS1          |
| YGL025C                                          | PGD1          | YJL140W                 | RPB4          |
| YFR009W                                          | GCN20         | YJL189W                 | RPL39         |
| YAL016W                                          | TPD3          | YPR040W                 | TIP41         |
| YDR225W                                          | HTA1          | YGL241W                 | KAP114        |
| YDR142C                                          | PEX7          | YDR265W                 | PEX10         |
| YHR016C                                          | YSC84         | YOR284W                 | HUA2          |
| YDR244W                                          | PEX5          | YGL153W                 | PEX14         |
| YLR181C                                          | VTA1          | YDR486C                 | VPS60         |
| YHR030C                                          | SLT2          | YER099C                 | PRS2          |
| YDR265W                                          | PEX10         | YDL065C                 | PEX19         |
| YPL129W                                          | TAF14         | YNL059C                 | ARP5          |
| YLR148W                                          | PEP3          | YGL124C                 | MON1          |
| YDR265W                                          | PEX10         | YGR077C                 | PEX8          |
| YGR040W                                          | KSS1          | YBR083W                 | TEC1          |
| YGR283C                                          | YGR283C       | YMR310C                 | YMR310C       |
| YBL003C                                          | HTA2          | YGR275W                 | RTT102        |
| YHR079C                                          | IRE1          | YDR448W                 | ADA2          |
| YPR049C                                          | ATG11         | YOL082W                 | ATG19         |
| YDR244W                                          | PEX5          | YDL078C                 | MDH3          |
| YGL134W                                          | PCL10         | YLR258W                 | GSY2          |
| YBR041W                                          | FAT1          | YMR313C                 | TGL3          |
| YCR039C                                          | MATALPHA2     | YCR084C                 | TUP1          |
| YMR008C                                          | PLB1          | YMR127C                 | SAS2          |
| YOR106W                                          | VAM3          | YLR093C                 | NYV1          |

| Predictions at threshold level 0.90 continued... |               |                         |               |
|--------------------------------------------------|---------------|-------------------------|---------------|
| Gene1 of predicted pair                          |               | Gene2 of predicted pair |               |
| Systematic Name                                  | Standard Name | Systematic Name         | Standard Name |
| YPR167C                                          | MET16         | YLR043C                 | TRX1          |
| YJL124C                                          | LSM1          | YOR320C                 | GNT1          |
| YPL213W                                          | LEA1          | YJR050W                 | ISY1          |
| YOR212W                                          | STE4          | YFL026W                 | STE2          |
| YOR290C                                          | SNF2          | YHL025W                 | SNF6          |
| YFL026W                                          | STE2          | YPL187W                 | MF(ALPHA)1    |
| YJR125C                                          | ENT3          | YHR108W                 | GGA2          |
| YER110C                                          | KAP123        | YDR335W                 | MSN5          |
| YBR267W                                          | REI1          | YKR048C                 | NAP1          |
| YOL061W                                          | PRS5          | YER099C                 | PRS2          |
| YLR043C                                          | TRX1          | YLR093C                 | NYV1          |
| YHR084W                                          | STE12         | YMR164C                 | MSS11         |
| YNL021W                                          | HDA1          | YPR179C                 | HDA3          |
| YIL132C                                          | CSM2          | YLR376C                 | PSY3          |
| YMR095C                                          | SNO1          | YMR096W                 | SNZ1          |
| YOR138C                                          | RUP1          | YOR124C                 | UBP2          |
| YNR023W                                          | SNF12         | YBR289W                 | SNF5          |
| YBL016W                                          | FUS3          | YDL159W                 | STE7          |
| YLR176C                                          | RFX1          | YCR084C                 | TUP1          |
| YDR103W                                          | STE5          | YBR200W                 | BEM1          |
| YOR212W                                          | STE4          | YJL157C                 | FAR1          |
| YDR176W                                          | NGG1          | YDR216W                 | ADR1          |
| YAL024C                                          | LTE1          | YGR238C                 | KEL2          |
| YMR091C                                          | NPL6          | YCR020W-B               | HTL1          |
| YIL034C                                          | CAP2          | YGR080W                 | TWF1          |
| YPR018W                                          | RLF2          | YNL206C                 | RTT106        |
| YDR176W                                          | NGG1          | YPR072W                 | NOT5          |
| YER110C                                          | KAP123        | YNL030W                 | HHF2          |
| YPL115C                                          | BEM3          | YML109W                 | ZDS2          |

| Predictions at threshold level 0.90 continued... |               |                         |               |
|--------------------------------------------------|---------------|-------------------------|---------------|
| Gene1 of predicted pair                          |               | Gene2 of predicted pair |               |
| Systematic Name                                  | Standard Name | Systematic Name         | Standard Name |
| YER143W                                          | DDI1          | YAL030W                 | SNC1          |
| YDL185W                                          | TFP1          | YHR039C-A               | VMA10         |
| YLR447C                                          | VMA6          | YDL185W                 | TFP1          |
| YLR399C                                          | BDF1          | YNL030W                 | HHF2          |
| YBR009C                                          | HHF1          | YDR227W                 | SIR4          |
| YPL042C                                          | SSN3          | YGL025C                 | PGD1          |
| YMR026C                                          | PEX12         | YGL153W                 | PEX14         |
| YJL151C                                          | SNA3          | YHR016C                 | YSC84         |
| YLR362W                                          | STE11         | YBL016W                 | FUS3          |
| YJL210W                                          | PEX2          | YOL044W                 | PEX15         |
| YER118C                                          | SHO1          | YHL002W                 | HSE1          |
| YDR329C                                          | PEX3          | YOL044W                 | PEX15         |
| YDR329C                                          | PEX3          | YDR244W                 | PEX5          |
| YOL061W                                          | PRS5          | YBL068W                 | PRS4          |
| YJL124C                                          | LSM1          | YKR026C                 | GCN3          |
| YDR057W                                          | YOS9          | YDR144C                 | MKC7          |
| YNL206C                                          | RTT106        | YNL030W                 | HHF2          |
| YLR109W                                          | AHP1          | YLR043C                 | TRX1          |
| YPL045W                                          | VPS16         | YDL077C                 | VAM6          |
| YML100W                                          | TSL1          | YFL033C                 | RIM15         |
| YAL016W                                          | TPD3          | YGL190C                 | CDC55         |
| YLR096W                                          | KIN2          | YPR032W                 | SRO7          |
| YDR477W                                          | SNF1          | YER027C                 | GAL83         |
| YPR119W                                          | CLB2          | YNL197C                 | WHI3          |
| YPL105C                                          | YPL105C       | YKL074C                 | MUD2          |
| YBR108W                                          | YBR108W       | YLR144C                 | ACF2          |
| YCL010C                                          | SGF29         | YOL148C                 | SPT20         |
| YHR119W                                          | SET1          | YPL138C                 | SPP1          |
| YBR112C                                          | CYC8          | YDL005C                 | MED2          |

| Predictions at threshold level 0.90 continued... |               |                         |               |
|--------------------------------------------------|---------------|-------------------------|---------------|
| Gene1 of predicted pair                          |               | Gene2 of predicted pair |               |
| Systematic Name                                  | Standard Name | Systematic Name         | Standard Name |
| YDR382W                                          | RPP2B         | YJL124C                 | LSM1          |
| YNL243W                                          | SLA2          | YHR016C                 | YSC84         |
| YOR304W                                          | ISW2          | YDR207C                 | UME6          |
| YDL077C                                          | VAM6          | YNL147W                 | LSM7          |
| YDL239C                                          | ADY3          | YOL091W                 | SPO21         |
| YOL091W                                          | SPO21         | YOR177C                 | MPC54         |
| YHR160C                                          | PEX18         | YDR142C                 | PEX7          |
| YDR448W                                          | ADA2          | YPL129W                 | TAF14         |
| YGL158W                                          | RCK1          | YDR423C                 | CAD1          |
| YDR283C                                          | GCN2          | YFR009W                 | GCN20         |
| YGL200C                                          | EMP24         | YML067C                 | ERV41         |
| YPL164C                                          | MLH3          | YMR167W                 | MLH1          |
| YEL009C                                          | GCN4          | YJL176C                 | SWI3          |
| YOR212W                                          | STE4          | YDR264C                 | AKR1          |
| YHR149C                                          | SKG6          | YMR273C                 | ZDS1          |
| YGR041W                                          | BUD9          | YOR301W                 | RAX1          |
| YBL078C                                          | ATG8          | YOR106W                 | VAM3          |
| YPR040W                                          | TIP41         | YGL190C                 | CDC55         |
| YLR435W                                          | TSR2          | YGL189C                 | RPS26A        |
| YLR362W                                          | STE11         | YPR119W                 | CLB2          |
| YNL291C                                          | MID1          | YGR217W                 | CCH1          |
| YDR179C                                          | CSN9          | YMR025W                 | CSI1          |
| YBR020W                                          | GAL1          | YML051W                 | GAL80         |
| YGR200C                                          | ELP2          | YHR187W                 | IKI1          |
| YOR127W                                          | RGA1          | YGR152C                 | RSR1          |
| YBR200W                                          | BEM1          | YLR362W                 | STE11         |
| YPL129W                                          | TAF14         | YOR141C                 | ARP8          |
| YDR176W                                          | NGG1          | YPL129W                 | TAF14         |
| YDL106C                                          | PHO2          | YFR034C                 | PHO4          |



| Predictions at threshold level 0.90 continued... |               |                         |               |
|--------------------------------------------------|---------------|-------------------------|---------------|
| Gene1 of predicted pair                          |               | Gene2 of predicted pair |               |
| Systematic Name                                  | Standard Name | Systematic Name         | Standard Name |
| YBR127C                                          | VMA2          | YDL185W                 | TFP1          |
| YJL151C                                          | SNA3          | YKR030W                 | GMH1          |
| YLR453C                                          | RIF2          | YBR275C                 | RIF1          |
| YLL039C                                          | UBI4          | YPL256C                 | CLN2          |
| YKR035W-A                                        | DID2          | YPR173C                 | VPS4          |
| YHR200W                                          | RPN10         | YPR119W                 | CLB2          |
| YBR264C                                          | YPT10         | YGL198W                 | YIP4          |
| YCR020W-B                                        | HTL1          | YLR357W                 | RSC2          |
| YLR119W                                          | SRN2          | YKL041W                 | VPS24         |
| YKL213C                                          | DOA1          | YMR067C                 | UBX4          |
| YER118C                                          | SHO1          | YPR119W                 | CLB2          |
| YDR179C                                          | CSN9          | YJR084W                 | CSN12         |
| YOR078W                                          | BUD21         | YER102W                 | RPS8B         |
| YHR200W                                          | RPN10         | YPL248C                 | GAL4          |
| YEL009C                                          | GCN4          | YPL248C                 | GAL4          |
| YDR244W                                          | PEX5          | YGL205W                 | POX1          |
| YOR290C                                          | SNF2          | YDR073W                 | SNF11         |
| YNL243W                                          | SLA2          | YOR284W                 | HUA2          |
| YHL025W                                          | SNF6          | YKL109W                 | HAP4          |
| YEL009C                                          | GCN4          | YGR252W                 | GCN5          |
| YML001W                                          | YPT7          | YKR014C                 | YPT52         |
| YEL022W                                          | GEA2          | YKR030W                 | GMH1          |
| YDR146C                                          | SWI5          | YPL248C                 | GAL4          |
| YDR004W                                          | RAD57         | YLR394W                 | CST9          |
| YHR171W                                          | ATG7          | YMR159C                 | ATG16         |
| YKL213C                                          | DOA1          | YJL048C                 | UBX6          |
| YDR176W                                          | NGG1          | YBR111W-A               | SUS1          |
| YDL065C                                          | PEX19         | YNL214W                 | PEX17         |
| YNL044W                                          | YIP3          | YKR014C                 | YPT52         |

| Predictions at threshold level 0.90 continued... |               |                         |               |
|--------------------------------------------------|---------------|-------------------------|---------------|
| Gene1 of predicted pair                          |               | Gene2 of predicted pair |               |
| Systematic Name                                  | Standard Name | Systematic Name         | Standard Name |
| YLR313C                                          | SPH1          | YDL159W                 | STE7          |
| YNL021W                                          | HDA1          | YCR084C                 | TUP1          |
| YBR041W                                          | FAT1          | YKL094W                 | YJU3          |
| YBL008W                                          | HIR1          | YBR289W                 | SNF5          |
| YPL152W                                          | RRD2          | YDL047W                 | SIT4          |
| YKL110C                                          | KTI12         | YDL047W                 | SIT4          |
| YGL033W                                          | HOP2          | YGL183C                 | MND1          |
| YFR010W                                          | UBP6          | YHL030W                 | ECM29         |
| YPL129W                                          | TAF14         | YOL051W                 | GAL11         |
| YBR017C                                          | KAP104        | YKR082W                 | NUP133        |
| YBR270C                                          | BIT2          | YNL047C                 | SLM2          |
| YBR182C                                          | SMP1          | YPL089C                 | RLM1          |
| YLR360W                                          | VPS38         | YBR128C                 | ATG14         |
| YDR448W                                          | ADA2          | YOR023C                 | AHC1          |
| YPR018W                                          | RLF2          | YBR009C                 | HHF1          |
| YPL129W                                          | TAF14         | YBR010W                 | HHT1          |
| YER173W                                          | RAD24         | YHR079C-A               | SAE3          |
| YMR109W                                          | MYO5          | YMR032W                 | HOF1          |
| YBL008W                                          | HIR1          | YBR009C                 | HHF1          |
| YKL139W                                          | CTK1          | YNL004W                 | HRB1          |
| YHR010W                                          | RPL27A        | YIL133C                 | RPL16A        |
| YBR112C                                          | CYC8          | YLR176C                 | RFX1          |
| YPR072W                                          | NOT5          | YOL148C                 | SPT20         |
| YDR192C                                          | NUP42         | YKL068W                 | NUP100        |
| YOR038C                                          | HIR2          | YBR010W                 | HHT1          |
| YGL066W                                          | SGF73         | YCL010C                 | SGF29         |
| YKL181W                                          | PRS1          | YER099C                 | PRS2          |
| YKL007W                                          | CAP1          | YGR080W                 | TWF1          |
| YDR265W                                          | PEX10         | YAL055W                 | PEX22         |

| Predictions at threshold level 0.90 continued... |               |                         |               |
|--------------------------------------------------|---------------|-------------------------|---------------|
| Gene1 of predicted pair                          |               | Gene2 of predicted pair |               |
| Systematic Name                                  | Standard Name | Systematic Name         | Standard Name |
| YOR332W                                          | VMA4          | YDL185W                 | TFP1          |
| YBR065C                                          | ECM2          | YPR101W                 | SNT309        |
| YPL129W                                          | TAF14         | YLR399C                 | BDF1          |
| YDR477W                                          | SNF1          | YDR028C                 | REG1          |
| YBR126C                                          | TPS1          | YMR261C                 | TPS3          |
| YPL129W                                          | TAF14         | YDL005C                 | MED2          |
| YGL161C                                          | YIP5          | YGL198W                 | YIP4          |
| YPR049C                                          | ATG11         | YLR423C                 | ATG17         |
| YDR293C                                          | SSD1          | YER033C                 | ZRG8          |
| YPR173C                                          | VPS4          | YKL041W                 | VPS24         |
| YHR013C                                          | ARD1          | YPR119W                 | CLB2          |
| YIL038C                                          | NOT3          | YGR134W                 | CAF130        |
| YJL044C                                          | GYP6          | YDR456W                 | NHX1          |
| YDR443C                                          | SSN2          | YPR072W                 | NOT5          |
| YHR084W                                          | STE12         | YBR083W                 | TEC1          |
| YER087C-B                                        | SBH1          | YNR049C                 | MSO1          |
| YMR164C                                          | MSS11         | YER109C                 | FLO8          |
| YBR217W                                          | ATG12         | YHR171W                 | ATG7          |
| YNL069C                                          | RPL16B        | YGL246C                 | RAI1          |
| YKL073W                                          | LHS1          | YJL159W                 | HSP150        |
| YHR119W                                          | SET1          | YAR003W                 | SWD1          |
| YDR477W                                          | SNF1          | YGL208W                 | SIP2          |
| YLR432W                                          | IMD3          | YHR216W                 | IMD2          |
| YDR443C                                          | SSN2          | YPL248C                 | GAL4          |
| YLR234W                                          | TOP3          | YPR119W                 | CLB2          |
| YGL153W                                          | PEX14         | YNL214W                 | PEX17         |
| YPL042C                                          | SSN3          | YCR084C                 | TUP1          |
| YOR076C                                          | SKI7          | YHR081W                 | LRP1          |
| YPL161C                                          | BEM4          | YDR218C                 | SPR28         |

| Predictions at threshold level 0.90 continued... |               |                         |               |
|--------------------------------------------------|---------------|-------------------------|---------------|
| Gene1 of predicted pair                          |               | Gene2 of predicted pair |               |
| Systematic Name                                  | Standard Name | Systematic Name         | Standard Name |
| YCR084C                                          | TUP1          | YBR089C-A               | NHP6B         |
| YHL002W                                          | HSE1          | YNR006W                 | VPS27         |
| YOR324C                                          | FRT1          | YML057W                 | CMP2          |
| YNL094W                                          | APP1          | YJL187C                 | SWE1          |
| YKR069W                                          | MET1          | YMR109W                 | MYO5          |
| YDR192C                                          | NUP42         | YNL049C                 | SFB2          |
| YMR201C                                          | RAD14         | YBR114W                 | RAD16         |
| YOR047C                                          | STD1          | YDL194W                 | SNF3          |
| YMR231W                                          | PEP5          | YAL002W                 | VPS8          |
| YGR003W                                          | CUL3          | YDR139C                 | RUB1          |
| YJR099W                                          | YUH1          | YDR139C                 | RUB1          |
| YOR270C                                          | VPH1          | YKL119C                 | VPH2          |
| YDR225W                                          | HTA1          | YNL107W                 | YAF9          |
| YLR181C                                          | VTA1          | YKL041W                 | VPS24         |
| YOL018C                                          | TLG2          | YJL164C                 | TPK1          |
| YLR258W                                          | GSY2          | YPR119W                 | CLB2          |
| YAL014C                                          | SYN8          | YAL030W                 | SNC1          |
| YOR290C                                          | SNF2          | YOR038C                 | HIR2          |
| YGR040W                                          | KSS1          | YLR362W                 | STE11         |
| YPL089C                                          | RLM1          | YKL161C                 | YKL161C       |
| YBL017C                                          | PEP1          | YDR484W                 | VPS52         |
| YMR164C                                          | MSS11         | YBR083W                 | TEC1          |
| YPL198W                                          | RPL7B         | YOR078W                 | BUD21         |
| YER114C                                          | BOI2          | YML109W                 | ZDS2          |
| YBR131W                                          | CCZ1          | YOR106W                 | VAM3          |
| YNL027W                                          | CRZ1          | YIL033C                 | BCY1          |
| YDL232W                                          | OST4          | YOR085W                 | OST3          |
| YGL025C                                          | PGD1          | YGL151W                 | NUT1          |
| YLR178C                                          | TFS1          | YOL081W                 | IRA2          |

| Predictions at threshold level 0.90 continued... |               |                         |               |
|--------------------------------------------------|---------------|-------------------------|---------------|
| Gene1 of predicted pair                          |               | Gene2 of predicted pair |               |
| Systematic Name                                  | Standard Name | Systematic Name         | Standard Name |
| YJL210W                                          | PEX2          | YNL214W                 | PEX17         |
| YHR152W                                          | SPO12         | YPR119W                 | CLB2          |
| YLR206W                                          | ENT2          | YBL106C                 | SRO77         |
| YOL100W                                          | PKH2          | YPL004C                 | LSP1          |
| YDR202C                                          | RAV2          | YDL185W                 | TFP1          |
| YOR145C                                          | PNO1          | YOR001W                 | RRP6          |
| YML099C                                          | ARG81         | YMR042W                 | ARG80         |
| YLR093C                                          | NYV1          | YEL013W                 | VAC8          |
| YDR009W                                          | GAL3          | YML051W                 | GAL80         |
| YDL149W                                          | ATG9          | YLR431C                 | ATG23         |
| YFR008W                                          | FAR7          | YMR052W                 | FAR3          |
| YOR180C                                          | DCI1          | YLR284C                 | ECI1          |
| YOR358W                                          | HAP5          | YPL248C                 | GAL4          |
| YPL049C                                          | DIG1          | YDR480W                 | DIG2          |
| YJL210W                                          | PEX2          | YMR026C                 | PEX12         |
| YML109W                                          | ZDS2          | YDR227W                 | SIR4          |
| YCR002C                                          | CDC10         | YCL024W                 | KCC4          |
| YDR358W                                          | GGA1          | YDL137W                 | ARF2          |
| YIL153W                                          | RRD1          | YGL190C                 | CDC55         |
| YNL206C                                          | RTT106        | YLR399C                 | BDF1          |
| YDR200C                                          | VPS64         | YMR052W                 | FAR3          |
| YPR131C                                          | NAT3          | YKR024C                 | DBP7          |
| YBR200W                                          | BEM1          | YBL085W                 | BOI1          |
| YGL095C                                          | VPS45         | YOL018C                 | TLG2          |
| YGL066W                                          | SGF73         | YBR111W-A               | SUS1          |
| YKR014C                                          | YPT52         | YLR093C                 | NYV1          |
| YHR052W                                          | CIC1          | YHR010W                 | RPL27A        |
| YNL209W                                          | SSB2          | YDR477W                 | SNF1          |
| YDR448W                                          | ADA2          | YLR399C                 | BDF1          |

| Predictions at threshold level 0.90 continued... |               |                         |               |
|--------------------------------------------------|---------------|-------------------------|---------------|
| Gene1 of predicted pair                          |               | Gene2 of predicted pair |               |
| Systematic Name                                  | Standard Name | Systematic Name         | Standard Name |
| YHR052W                                          | CIC1          | YKR024C                 | DBP7          |
| YHR171W                                          | ATG7          | YLR093C                 | NYV1          |
| YPL129W                                          | TAF14         | YJL124C                 | LSM1          |
| YER114C                                          | BOI2          | YER124C                 | DSE1          |
| YOR324C                                          | FRT1          | YLR433C                 | CNA1          |
| YDR293C                                          | SSD1          | YKR028W                 | SAP190        |
| YML051W                                          | GAL80         | YPL248C                 | GAL4          |
| YDL020C                                          | RPN4          | YIL007C                 | NAS2          |
| YCR063W                                          | BUD31         | YPL213W                 | LEA1          |
| YDR289C                                          | RTT103        | YGL246C                 | RAI1          |
| YDR265W                                          | PEX10         | YGL153W                 | PEX14         |
| YNL242W                                          | ATG2          | YDL149W                 | ATG9          |
| YOR332W                                          | VMA4          | YEL051W                 | VMA8          |
| YHR171W                                          | ATG7          | YBL078C                 | ATG8          |
| YKR101W                                          | SIR1          | YDR227W                 | SIR4          |
| YMR091C                                          | NPL6          | YGR275W                 | RTT102        |
| YDR225W                                          | HTA1          | YDL042C                 | SIR2          |
| YPR173C                                          | VPS4          | YDR486C                 | VPS60         |
| YDL127W                                          | PCL2          | YDR146C                 | SWI5          |
| YFR024C-A                                        | LSB3          | YJL151C                 | SNA3          |
| YDL185W                                          | TFP1          | YPL234C                 | TFP3          |
| YNL293W                                          | MSB3          | YGL198W                 | YIP4          |
| YMR224C                                          | MRE11         | YLR357W                 | RSC2          |
| YGR252W                                          | GCN5          | YPL248C                 | GAL4          |
| YLR109W                                          | AHP1          | YML028W                 | TSA1          |
| YLR191W                                          | PEX13         | YPR119W                 | CLB2          |
| YPL106C                                          | SSE1          | YPR119W                 | CLB2          |
| YGR275W                                          | RTT102        | YHL025W                 | SNF6          |
| YDL113C                                          | ATG20         | YJL036W                 | SNX4          |

| Predictions at threshold level 0.90 continued... |               |                         |               |
|--------------------------------------------------|---------------|-------------------------|---------------|
| Gene1 of predicted pair                          |               | Gene2 of predicted pair |               |
| Systematic Name                                  | Standard Name | Systematic Name         | Standard Name |
| YPL129W                                          | TAF14         | YJL140W                 | RPB4          |
| YEL009C                                          | GCN4          | YBR289W                 | SNF5          |
| YER179W                                          | DMC1          | YDR146C                 | SWI5          |
| YBL078C                                          | ATG8          | YDR080W                 | VPS41         |
| YNL031C                                          | HHT2          | YDR440W                 | DOT1          |
| YER174C                                          | GRX4          | YGR262C                 | BUD32         |
| YMR016C                                          | SOK2          | YMR037C                 | MSN2          |
| YNL139C                                          | RLR1          | YCL011C                 | GBP2          |
| YLR080W                                          | EMP46         | YFL048C                 | EMP47         |
| YNR058W                                          | BIO3          | YFR021W                 | ATG18         |
| YIL156W                                          | UBP7          | YMR109W                 | MYO5          |
| YJR052W                                          | RAD7          | YER162C                 | RAD4          |
| YDR009W                                          | GAL3          | YPL248C                 | GAL4          |
| YFL004W                                          | VTC2          | YER072W                 | VTC1          |
| YIL045W                                          | PIG2          | YLR258W                 | GSY2          |
| YMR054W                                          | STV1          | YKL080W                 | VMA5          |
| YDL185W                                          | TFP1          | YGR105W                 | VMA21         |
| YLR377C                                          | FBP1          | YOL126C                 | MDH2          |
| YDR479C                                          | PEX29         | YLR324W                 | PEX30         |
| YJL065C                                          | DLS1          | YOR304W                 | ISW2          |
| YDR448W                                          | ADA2          | YGL066W                 | SGF73         |
| YPR167C                                          | MET16         | YER042W                 | MXR1          |
| YGL087C                                          | MMS2          | YDR092W                 | UBC13         |
| YLR441C                                          | RPS1A         | YHR203C                 | RPS4B         |
| YIL156W                                          | UBP7          | YHR114W                 | BZZ1          |
| YDR443C                                          | SSN2          | YNR052C                 | POP2          |
| YDR216W                                          | ADR1          | YPL248C                 | GAL4          |
| YMR231W                                          | PEP5          | YGL124C                 | MON1          |
| YIL159W                                          | BNR1          | YPR119W                 | CLB2          |

| Predictions at threshold level 0.90 continued... |               |                         |               |
|--------------------------------------------------|---------------|-------------------------|---------------|
| Gene1 of predicted pair                          |               | Gene2 of predicted pair |               |
| Systematic Name                                  | Standard Name | Systematic Name         | Standard Name |
| YGR086C                                          | PIL1          | YOL100W                 | PKH2          |
| YEL009C                                          | GCN4          | YCL010C                 | SGF29         |
| YHR084W                                          | STE12         | YDR480W                 | DIG2          |
| YCR063W                                          | BUD31         | YBR065C                 | ECM2          |
| YDR443C                                          | SSN2          | YIL038C                 | NOT3          |
| YDR225W                                          | HTA1          | YGR252W                 | GCN5          |
| YJR090C                                          | GRR1          | YDR028C                 | REG1          |
| YDR225W                                          | HTA1          | YBR009C                 | HHF1          |
| YNR023W                                          | SNF12         | YHL025W                 | SNF6          |
| YIR009W                                          | MSL1          | YPL213W                 | LEA1          |
| YFR034C                                          | PHO4          | YPL248C                 | GAL4          |
| YDR192C                                          | NUP42         | YDR335W                 | MSN5          |
| YMR026C                                          | PEX12         | YDL065C                 | PEX19         |
| YDR245W                                          | MNN10         | YEL036C                 | ANP1          |
| YLR385C                                          | SWC7          | YNL107W                 | YAF9          |
| YHR171W                                          | ATG7          | YNR007C                 | ATG3          |
| YGL053W                                          | PRM8          | YAR031W                 | PRM9          |
| YPL129W                                          | TAF14         | YGL151W                 | NUT1          |
| YBR111W-A                                        | SUS1          | YPL181W                 | CTI6          |
| YLR240W                                          | VPS34         | YBR128C                 | ATG14         |
| YDR507C                                          | GIN4          | YNL166C                 | BNI5          |
| YBR217W                                          | ATG12         | YMR159C                 | ATG16         |
| YJL204C                                          | RCY1          | YGL198W                 | YIP4          |
| YLR399C                                          | BDF1          | YGR252W                 | GCN5          |
| YPR052C                                          | NHP6A         | YGL071W                 | AFT1          |
| YCL032W                                          | STE50         | YMR139W                 | RIM11         |
| YBR041W                                          | FAT1          | YKL140W                 | TGL1          |
| YBL078C                                          | ATG8          | YLR093C                 | NYV1          |
| YJL084C                                          | ALY2          | YIL050W                 | PCL7          |



| Predictions at threshold level 0.90 continued... |               |                         |               |
|--------------------------------------------------|---------------|-------------------------|---------------|
| Gene1 of predicted pair                          |               | Gene2 of predicted pair |               |
| Systematic Name                                  | Standard Name | Systematic Name         | Standard Name |
| YMR261C                                          | TPS3          | YFL033C                 | RIM15         |
| YOR140W                                          | SFL1          | YPL203W                 | TPK2          |
| YOR231W                                          | MKK1          | YJL095W                 | BCK1          |
| YJL157C                                          | FAR1          | YJR086W                 | STE18         |
| YOR327C                                          | SNC2          | YEL036C                 | ANP1          |
| YLR248W                                          | RCK2          | YDL047W                 | SIT4          |
| YER180C-A                                        | SLO1          | YPL051W                 | ARL3          |
| YMR068W                                          | AVO2          | YNL047C                 | SLM2          |
| YDL099W                                          | BUG1          | YKL050C                 | YKL050C       |
| YPR036W                                          | VMA13         | YLR447C                 | VMA6          |
| YBR200W                                          | BEM1          | YDL159W                 | STE7          |
| YCR002C                                          | CDC10         | YNL166C                 | BNI5          |
| YKL129C                                          | MYO3          | YMR032W                 | HOF1          |
| YGL133W                                          | ITC1          | YJL065C                 | DLS1          |
| YLR191W                                          | PEX13         | YGL153W                 | PEX14         |
| YBR009C                                          | HHF1          | YNL107W                 | YAF9          |
| YGL066W                                          | SGF73         | YPR119W                 | CLB2          |
| YNL025C                                          | SSN8          | YOR140W                 | SFL1          |
| YDR142C                                          | PEX7          | YGR077C                 | PEX8          |
| YAL016W                                          | TPD3          | YPL152W                 | RRD2          |
| YJL137C                                          | GLG2          | YLR258W                 | GSY2          |
| YPL129W                                          | TAF14         | YOR290C                 | SNF2          |
| YAL056W                                          | GPB2          | YGL121C                 | GPG1          |
| YDL232W                                          | OST4          | YML019W                 | OST6          |
| YOR106W                                          | VAM3          | YPL045W                 | VPS16         |
| YHR052W                                          | CIC1          | YJL190C                 | RPS22A        |
| YMR080C                                          | NAM7          | YKL068W                 | NUP100        |
| YDL232W                                          | OST4          | YGL226C-A               | OST5          |
| YBR131W                                          | CCZ1          | YGL124C                 | MON1          |

| Predictions at threshold level 0.90 continued... |               |                         |               |
|--------------------------------------------------|---------------|-------------------------|---------------|
| Gene1 of predicted pair                          |               | Gene2 of predicted pair |               |
| Systematic Name                                  | Standard Name | Systematic Name         | Standard Name |
| YGL158W                                          | RCK1          | YNL065W                 | AQR1          |
| YPL112C                                          | PEX25         | YMR204C                 | INP1          |
| YBR010W                                          | HHT1          | YPL248C                 | GAL4          |
| YDL160C                                          | DHH1          | YPR119W                 | CLB2          |
| YOR344C                                          | TYE7          | YOL108C                 | INO4          |
| YBR131W                                          | CCZ1          | YLR396C                 | VPS33         |
| YLR265C                                          | NEJ1          | YGL090W                 | LIF1          |
| YPL129W                                          | TAF14         | YCR084C                 | TUP1          |
| YBR289W                                          | SNF5          | YDR073W                 | SNF11         |
| YGL249W                                          | ZIP2          | YLR394W                 | CST9          |
| YHR160C                                          | PEX18         | YIL160C                 | POT1          |
| YOR270C                                          | VPH1          | YEL051W                 | VMA8          |
| YJL210W                                          | PEX2          | YDR265W                 | PEX10         |
| YMR255W                                          | GFD1          | YMR273C                 | ZDS1          |
| YCL032W                                          | STE50         | YHR061C                 | GIC1          |
| YPR018W                                          | RLF2          | YOR213C                 | SAS5          |
| YHR084W                                          | STE12         | YPR119W                 | CLB2          |
| YDL042C                                          | SIR2          | YBR010W                 | HHT1          |
| YIL162W                                          | SUC2          | YBR283C                 | SSH1          |
| YOR270C                                          | VPH1          | YGR105W                 | VMA21         |
| YDR153C                                          | ENT5          | YNR006W                 | VPS27         |
| YDL155W                                          | CLB3          | YPL256C                 | CLN2          |
| YEL009C                                          | GCN4          | YNR023W                 | SNF12         |
| YBR200W                                          | BEM1          | YBL016W                 | FUS3          |
| YKL129C                                          | MYO3          | YOR247W                 | SRL1          |
| YPL024W                                          | RMI1          | YPR119W                 | CLB2          |
| YBR108W                                          | YBR108W       | YHR016C                 | YSC84         |
| YEL009C                                          | GCN4          | YGR104C                 | SRB5          |
| YJL176C                                          | SWI3          | YNR023W                 | SNF12         |

| Predictions at threshold level 0.90 continued... |               |                         |               |
|--------------------------------------------------|---------------|-------------------------|---------------|
| Gene1 of predicted pair                          |               | Gene2 of predicted pair |               |
| Systematic Name                                  | Standard Name | Systematic Name         | Standard Name |
| YKL034W                                          | TUL1          | YBR082C                 | UBC4          |
| YGR104C                                          | SRB5          | YPL248C                 | GAL4          |
| YPL042C                                          | SSN3          | YPL129W                 | TAF14         |
| YOR096W                                          | RPS7A         | YBL071W-A               | KTI11         |
| YDR329C                                          | PEX3          | YNL214W                 | PEX17         |
| YNL236W                                          | SIN4          | YPL248C                 | GAL4          |
| YDR244W                                          | PEX5          | YDR265W                 | PEX10         |
| YGR040W                                          | KSS1          | YDL159W                 | STE7          |
| YNL044W                                          | YIP3          | YGL198W                 | YIP4          |
| YBR217W                                          | ATG12         | YBL078C                 | ATG8          |
| YLR399C                                          | BDF1          | YBR009C                 | HHF1          |
| YGR238C                                          | KEL2          | YHR158C                 | KEL1          |
| YDR329C                                          | PEX3          | YMR026C                 | PEX12         |
| YOL067C                                          | RTG1          | YOL108C                 | INO4          |
| YER110C                                          | KAP123        | YBR017C                 | KAP104        |
| YOR032C                                          | HMS1          | YNL289W                 | PCL1          |
| YOL051W                                          | GAL11         | YGL151W                 | NUT1          |
| YPL129W                                          | TAF14         | YPL248C                 | GAL4          |
| YFR034C                                          | PHO4          | YGR233C                 | PHO81         |
| YML016C                                          | PPZ1          | YBR119W                 | MUD1          |
| YDR202C                                          | RAV2          | YBR127C                 | VMA2          |
| YGR252W                                          | GCN5          | YFL031W                 | HAC1          |
| YBR273C                                          | UBX7          | YKL213C                 | DOA1          |
| YGR104C                                          | SRB5          | YBR112C                 | CYC8          |
| YDR490C                                          | PKH1          | YMR104C                 | YPK2          |
| YJR058C                                          | APS2          | YJR005W                 | APL1          |
| YJL089W                                          | SIP4          | YDR477W                 | SNF1          |
| YDR092W                                          | UBC13         | YCR066W                 | RAD18         |
| YBR041W                                          | FAT1          | YOR059C                 | YOR059C       |

| Predictions at threshold level 0.90 continued... |               |                         |               |
|--------------------------------------------------|---------------|-------------------------|---------------|
| Gene1 of predicted pair                          |               | Gene2 of predicted pair |               |
| Systematic Name                                  | Standard Name | Systematic Name         | Standard Name |
| YOL082W                                          | ATG19         | YGL156W                 | AMS1          |
| YLR288C                                          | MEC3          | YHR152W                 | SPO12         |
| YFR021W                                          | ATG18         | YDL149W                 | ATG9          |
| YDL113C                                          | ATG20         | YPR049C                 | ATG11         |
| YJL110C                                          | GZF3          | YKR034W                 | DAL80         |
| YIL156W                                          | UBP7          | YHL002W                 | HSE1          |
| YGR241C                                          | YAP1802       | YJR125C                 | ENT3          |
| YBL088C                                          | TEL1          | YJR021C                 | REC107        |
| YPL090C                                          | RPS6A         | YGL246C                 | RAI1          |
| YML001W                                          | YPT7          | YPR028W                 | YOP1          |
| YOL051W                                          | GAL11         | YJL140W                 | RPB4          |
| YER044C-A                                        | MEI4          | YJR021C                 | REC107        |
| YBR065C                                          | ECM2          | YJR050W                 | ISY1          |
| YKL048C                                          | ELM1          | YPR119W                 | CLB2          |
| YBR041W                                          | FAT1          | YPR119W                 | CLB2          |
| YJL176C                                          | SWI3          | YDR073W                 | SNF11         |
| YDR028C                                          | REG1          | YDL229W                 | SSB1          |
| YOR332W                                          | VMA4          | YPR036W                 | VMA13         |
| YNL025C                                          | SSN8          | YCR084C                 | TUP1          |
| YDR142C                                          | PEX7          | YIL160C                 | POT1          |
| YLR433C                                          | CNA1          | YDR184C                 | ATC1          |
| YHR079C                                          | IRE1          | YOL148C                 | SPT20         |
| YEL009C                                          | GCN4          | YDR073W                 | SNF11         |
| YBR111W-A                                        | SUS1          | YGL252C                 | RTG2          |
| YNL253W                                          | TEX1          | YML062C                 | MFT1          |
| YNR032C-A                                        | HUB1          | YDL223C                 | HBT1          |
| YGL025C                                          | PGD1          | YCR084C                 | TUP1          |
| YJR031C                                          | GEA1          | YKR030W                 | GMH1          |
| YOR106W                                          | VAM3          | YEL013W                 | VAC8          |

| Predictions at threshold level 0.90 continued... |               |                         |               |
|--------------------------------------------------|---------------|-------------------------|---------------|
| Gene1 of predicted pair                          |               | Gene2 of predicted pair |               |
| Systematic Name                                  | Standard Name | Systematic Name         | Standard Name |
| YNL139C                                          | RLR1          | YNL253W                 | TEX1          |
| YCL067C                                          | HMLALPHA2     | YCL066W                 | HMLALPHA1     |
| YDR080W                                          | VPS41         | YPL045W                 | VPS16         |
| YLR093C                                          | NYV1          | YOR036W                 | PEP12         |
| YLR396C                                          | VPS33         | YML001W                 | YPT7          |
| YNL288W                                          | CAF40         | YIL038C                 | NOT3          |
| YPL147W                                          | PXA1          | YKL188C                 | PXA2          |
| YIL159W                                          | BNR1          | YKL129C                 | MYO3          |
| YOR129C                                          | YOR129C       | YNL225C                 | CNM67         |
| YKL110C                                          | KTI12         | YHR187W                 | IKI1          |
| YDL227C                                          | HO            | YER143W                 | DDI1          |
| YLR181C                                          | VTA1          | YOR275C                 | RIM20         |
| YLR109W                                          | AHP1          | YGR209C                 | TRX2          |
| YHL025W                                          | SNF6          | YDR073W                 | SNF11         |
| YER054C                                          | GIP2          | YAR014C                 | BUD14         |
| YLR399C                                          | BDF1          | YGL019W                 | CKB1          |
| YBR041W                                          | FAT1          | YMR152W                 | YIM1          |
| YER110C                                          | KAP123        | YGR252W                 | GCN5          |
| YGR261C                                          | APL6          | YKL135C                 | APL2          |
| YJL127C                                          | SPT10         | YMR179W                 | SPT21         |
| YDR176W                                          | NGG1          | YGL013C                 | PDR1          |
| YBL078C                                          | ATG8          | YLR043C                 | TRX1          |
| YGR252W                                          | GCN5          | YOR141C                 | ARP8          |
| YPL001W                                          | HAT1          | YLL022C                 | HIF1          |
| YBR200W                                          | BEM1          | YJL157C                 | FAR1          |
| YBR289W                                          | SNF5          | YHL025W                 | SNF6          |
| YPR119W                                          | CLB2          | YOL108C                 | INO4          |
| YOR327C                                          | SNC2          | YJL164C                 | TPK1          |
| YKL164C                                          | PIR1          | YKL114C                 | APN1          |

| Predictions at threshold level 0.90 continued... |               |                         |               |
|--------------------------------------------------|---------------|-------------------------|---------------|
| Gene1 of predicted pair                          |               | Gene2 of predicted pair |               |
| Systematic Name                                  | Standard Name | Systematic Name         | Standard Name |
| YMR201C                                          | RAD14         | YOL090W                 | MSH2          |
| YBR009C                                          | HHF1          | YOR038C                 | HIR2          |
| YER124C                                          | DSE1          | YBL085W                 | BOI1          |
| YEL046C                                          | GLY1          | YPL249C                 | GYP5          |
| YOR270C                                          | VPH1          | YLR447C                 | VMA6          |
| YKL010C                                          | UFD4          | YBR082C                 | UBC4          |
| YER019C-A                                        | SBH2          | YOR085W                 | OST3          |
| YNL093W                                          | YPT53         | YKR014C                 | YPT52         |
| YOR096W                                          | RPS7A         | YHR203C                 | RPS4B         |
| YNL288W                                          | CAF40         | YER068W                 | MOT2          |
| YIL045W                                          | PIG2          | YAR014C                 | BUD14         |
| YBR126C                                          | TPS1          | YML100W                 | TSL1          |
| YOL013C                                          | HRD1          | YLR207W                 | HRD3          |
| YBR084C-A                                        | RPL19A        | YGL246C                 | RAI1          |
| YFR008W                                          | FAR7          | YDR200C                 | VPS64         |
| YLR396C                                          | VPS33         | YLR093C                 | NYV1          |
| YBL008W                                          | HIR1          | YBR010W                 | HHT1          |
| YIR025W                                          | MND2          | YLR102C                 | APC9          |
| YCL001W                                          | RER1          | YPL227C                 | ALG5          |
| YDR225W                                          | HTA1          | YKR048C                 | NAP1          |
| YNL333W                                          | SNZ2          | YAR014C                 | BUD14         |
| YOR332W                                          | VMA4          | YOR270C                 | VPH1          |
| YGL180W                                          | ATG1          | YLR423C                 | ATG17         |
| YLR422W                                          | YLR422W       | YOL108C                 | INO4          |
| YGR104C                                          | SRB5          | YCR084C                 | TUP1          |
| YGL153W                                          | PEX14         | YAL055W                 | PEX22         |
| YLR191W                                          | PEX13         | YGR077C                 | PEX8          |
| YIL033C                                          | BCY1          | YBL106C                 | SRO77         |
| YHR079C                                          | IRE1          | YER089C                 | PTC2          |

| Predictions at threshold level 0.90 continued... |               |                         |               |
|--------------------------------------------------|---------------|-------------------------|---------------|
| Gene1 of predicted pair                          |               | Gene2 of predicted pair |               |
| Systematic Name                                  | Standard Name | Systematic Name         | Standard Name |
| YDR363W-A                                        | SEM1          | YPL248C                 | GAL4          |
| YLR144C                                          | ACF2          | YHR016C                 | YSC84         |
| YLR456W                                          | YLR456W       | YKR084C                 | HBS1          |
| YNL094W                                          | APP1          | YHR016C                 | YSC84         |
| YKR014C                                          | YPT52         | YGL198W                 | YIP4          |
| YKL135C                                          | APL2          | YJR125C                 | ENT3          |
| YKL160W                                          | ELF1          | YGL019W                 | CKB1          |
| YBR131W                                          | CCZ1          | YDR080W                 | VPS41         |
| YDL042C                                          | SIR2          | YNL031C                 | HHT2          |
| YHR052W                                          | CIC1          | YJL189W                 | RPL39         |
| YJL029C                                          | VPS53         | YOL018C                 | TLG2          |
| YER110C                                          | KAP123        | YBR010W                 | HHT1          |
| YCR084C                                          | TUP1          | YPL248C                 | GAL4          |
| YOL148C                                          | SPT20         | YGL252C                 | RTG2          |
| YLR396C                                          | VPS33         | YDL077C                 | VAM6          |
| YPL047W                                          | SGF11         | YBR111W-A               | SUS1          |
| YMR273C                                          | ZDS1          | YDR227W                 | SIR4          |
| YMR052W                                          | FAR3          | YNL127W                 | FAR11         |
| YLR064W                                          | YLR064W       | YHR016C                 | YSC84         |
| YNR032C-A                                        | HUB1          | YLR313C                 | SPH1          |
| YNL021W                                          | HDA1          | YDR295C                 | HDA2          |
| YMR273C                                          | ZDS1          | YIL033C                 | BCY1          |
| YIL033C                                          | BCY1          | YJL164C                 | TPK1          |
| YNL201C                                          | PSY2          | YPR040W                 | TIP41         |
| YOR085W                                          | OST3          | YML019W                 | OST6          |
| YPL239W                                          | YAR1          | YKL143W                 | LTV1          |
| YDR083W                                          | RRP8          | YOR001W                 | RRP6          |
| YDL232W                                          | OST4          | YER019C-A               | SBH2          |
| YMR091C                                          | NPL6          | YNL041C                 | COG6          |

| Predictions at threshold level 0.90 continued... |               |                         |               |
|--------------------------------------------------|---------------|-------------------------|---------------|
| Gene1 of predicted pair                          |               | Gene2 of predicted pair |               |
| Systematic Name                                  | Standard Name | Systematic Name         | Standard Name |
| YDL175C                                          | AIR2          | YJL124C                 | LSM1          |
| YIR009W                                          | MSL1          | YJR050W                 | ISY1          |
| YOR231W                                          | MKK1          | YPR119W                 | CLB2          |
| YCR088W                                          | ABP1          | YHR016C                 | YSC84         |
| YJL124C                                          | LSM1          | YNL145W                 | MFA2          |
| YHR079C                                          | IRE1          | YGR252W                 | GCN5          |
| YGL241W                                          | KAP114        | YGR252W                 | GCN5          |
| YBR019C                                          | GAL10         | YGL252C                 | RTG2          |
| YDR244W                                          | PEX5          | YNL214W                 | PEX17         |
| YKL129C                                          | MYO3          | YJL095W                 | BCK1          |
| YPR036W                                          | VMA13         | YDL185W                 | TFP1          |
| YDL042C                                          | SIR2          | YMR273C                 | ZDS1          |
| YMR273C                                          | ZDS1          | YDR309C                 | GIC2          |
| YKL074C                                          | MUD2          | YLR357W                 | RSC2          |
| YNL201C                                          | PSY2          | YBL046W                 | PSY4          |
| YJL080C                                          | SCP160        | YOR198C                 | BFR1          |
| YJR083C                                          | ACF4          | YHR016C                 | YSC84         |
| YJL176C                                          | SWI3          | YOR038C                 | HIR2          |
| YJR082C                                          | EAF6          | YNL107W                 | YAF9          |
| YHR124W                                          | NDT80         | YJL106W                 | IME2          |
| YFR034C                                          | PHO4          | YOL108C                 | INO4          |
| YMR055C                                          | BUB2          | YHR061C                 | GIC1          |
| YOR106W                                          | VAM3          | YMR231W                 | PEP5          |
| YMR242C                                          | RPL20A        | YGL246C                 | RAI1          |
| YDR080W                                          | VPS41         | YLR396C                 | VPS33         |
| YCL011C                                          | GBP2          | YHR167W                 | THP2          |
| YOR327C                                          | SNC2          | YMR017W                 | SPO20         |
| YLR227C                                          | ADY4          | YOL091W                 | SPO21         |
| YDL154W                                          | MSH5          | YLR394W                 | CST9          |



| Predictions at threshold level 0.90 continued... |               |                         |               |
|--------------------------------------------------|---------------|-------------------------|---------------|
| Gene1 of predicted pair                          |               | Gene2 of predicted pair |               |
| Systematic Name                                  | Standard Name | Systematic Name         | Standard Name |
| YPL042C                                          | SSN3          | YPL248C                 | GAL4          |
| YDR448W                                          | ADA2          | YCL010C                 | SGF29         |
| YNL004W                                          | HRB1          | YHR167W                 | THP2          |
| YBL003C                                          | HTA2          | YGR252W                 | GCN5          |
| YLR109W                                          | AHP1          | YPR167C                 | MET16         |
| YBL003C                                          | HTA2          | YBR010W                 | HHT1          |
| YGR041W                                          | BUD9          | YLR353W                 | BUD8          |

Predicted pairs at a threshold level of 0.95

| Predictions at threshold level 0.95 |               |                         |               |
|-------------------------------------|---------------|-------------------------|---------------|
| Gene1 of predicted pair             |               | Gene2 of predicted pair |               |
| Systematic Name                     | Standard Name | Systematic Name         | Standard Name |
| YBR017C                             | KAP104        | YKL057C                 | NUP120        |
| YDL065C                             | PEX19         | YGL153W                 | PEX14         |
| YML099C                             | ARG81         | YDR207C                 | UME6          |
| YDR225W                             | HTA1          | YBL003C                 | HTA2          |
| YHR119W                             | SET1          | YBR175W                 | SWD3          |
| YPL046C                             | ELC1          | YNL230C                 | ELA1          |
| YHR052W                             | CIC1          | YLR325C                 | RPL38         |
| YOR290C                             | SNF2          | YKL109W                 | HAP4          |
| YPL147W                             | PXA1          | YPL145C                 | KES1          |
| YOR094W                             | ARF3          | YCL034W                 | LSB5          |
| YPR018W                             | RLF2          | YDR181C                 | SAS4          |
| YGL200C                             | EMP24         | YML012W                 | ERV25         |
| YDR101C                             | ARX1          | YBR267W                 | REI1          |
| YLR043C                             | TRX1          | YER042W                 | MXR1          |
| YBL008W                             | HIR1          | YJL176C                 | SWI3          |
| YPR029C                             | APL4          | YDR153C                 | ENT5          |
| YAL030W                             | SNC1          | YPR032W                 | SRO7          |
| YPL042C                             | SSN3          | YOL051W                 | GAL11         |
| YBR264C                             | YPT10         | YNL044W                 | YIP3          |
| YPL046C                             | ELC1          | YBR114W                 | RAD16         |
| YPL129W                             | TAF14         | YBR289W                 | SNF5          |
| YOL044W                             | PEX15         | YGL153W                 | PEX14         |
| YDR123C                             | INO2          | YHL020C                 | OPI1          |
| YBR089C-A                           | NHP6B         | YPL248C                 | GAL4          |
| YDL020C                             | RPN4          | YLR024C                 | UBR2          |
| YJL210W                             | PEX2          | YLR191W                 | PEX13         |
| YPL203W                             | TPK2          | YIL033C                 | BCY1          |
| YLR273C                             | PIG1          | YLR258W                 | GSY2          |

| Predictions at threshold level 0.95 continued... |               |                         |               |
|--------------------------------------------------|---------------|-------------------------|---------------|
| Gene1 of predicted pair                          |               | Gene2 of predicted pair |               |
| Systematic Name                                  | Standard Name | Systematic Name         | Standard Name |
| YBR270C                                          | BIT2          | YIL105C                 | SLM1          |
| YDR192C                                          | NUP42         | YER110C                 | KAP123        |
| YJL210W                                          | PEX2          | YDR142C                 | PEX7          |
| YOR279C                                          | RFM1          | YDR310C                 | SUM1          |
| YDR176W                                          | NGG1          | YGL252C                 | RTG2          |
| YJL083W                                          | TAX4          | YIL002C                 | INP51         |
| YLR191W                                          | PEX13         | YDL065C                 | PEX19         |
| YDR123C                                          | INO2          | YOL108C                 | INO4          |
| YDR225W                                          | HTA1          | YOR141C                 | ARP8          |
| YHR200W                                          | RPN10         | YLR421C                 | RPN13         |
| YLR227C                                          | ADY4          | YNL225C                 | CNM67         |
| YIR025W                                          | MND2          | YDR260C                 | SWM1          |
| YOR023C                                          | AHC1          | YGR252W                 | GCN5          |
| YDR448W                                          | ADA2          | YPL248C                 | GAL4          |
| YDL065C                                          | PEX19         | YGR077C                 | PEX8          |
| YIL105C                                          | SLM1          | YJL058C                 | BIT61         |
| YCR088W                                          | ABP1          | YOR284W                 | HUA2          |
| YDR225W                                          | HTA1          | YLR399C                 | BDF1          |
| YGL208W                                          | SIP2          | YGL115W                 | SNF4          |
| YMR139W                                          | RIM11         | YJR094C                 | IME1          |
| YDR225W                                          | HTA1          | YBL002W                 | HTB2          |
| YDR379W                                          | RGA2          | YGR152C                 | RSR1          |
| YER087C-B                                        | SBH1          | YOR085W                 | OST3          |
| YNL253W                                          | TEX1          | YCL011C                 | GBP2          |
| YDR265W                                          | PEX10         | YNL214W                 | PEX17         |
| YML007W                                          | YAP1          | YGL208W                 | SIP2          |
| YDL127W                                          | PCL2          | YFR034C                 | PHO4          |
| YGR268C                                          | HUA1          | YHR016C                 | YSC84         |
| YOR332W                                          | VMA4          | YJR033C                 | RAV1          |

| Predictions at threshold level 0.95 continued... |               |                         |               |
|--------------------------------------------------|---------------|-------------------------|---------------|
| Gene1 of predicted pair                          |               | Gene2 of predicted pair |               |
| Systematic Name                                  | Standard Name | Systematic Name         | Standard Name |
| YFR036W                                          | CDC26         | YPR119W                 | CLB2          |
| YPL001W                                          | HAT1          | YBR009C                 | HHF1          |
| YOR014W                                          | RTS1          | YPR119W                 | CLB2          |
| YLR240W                                          | VPS34         | YPL120W                 | VPS30         |
| YDL042C                                          | SIR2          | YBR009C                 | HHF1          |
| YIR009W                                          | MSL1          | YPR101W                 | SNT309        |
| YMR091C                                          | NPL6          | YLL026W                 | HSP104        |
| YJL124C                                          | LSM1          | YPL220W                 | RPL1A         |
| YHR119W                                          | SET1          | YLR015W                 | BRE2          |
| YER110C                                          | KAP123        | YNL031C                 | HHT2          |
| YPL256C                                          | CLN2          | YPR119W                 | CLB2          |
| YOR106W                                          | VAM3          | YLR396C                 | VPS33         |
| YDR225W                                          | HTA1          | YBR010W                 | HHT1          |
| YML058W                                          | SML1          | YIL066C                 | RNR3          |
| YMR026C                                          | PEX12         | YGR077C                 | PEX8          |
| YOR106W                                          | VAM3          | YGL124C                 | MON1          |
| YDR329C                                          | PEX3          | YLR191W                 | PEX13         |
| YHL006C                                          | SHU1          | YLR376C                 | PSY3          |
| YIL156W                                          | UBP7          | YKL129C                 | MYO3          |
| YOL051W                                          | GAL11         | YPL248C                 | GAL4          |
| YPL183C                                          | YPL183C       | YBR061C                 | TRM7          |
| YDR225W                                          | HTA1          | YBR111W-A               | SUS1          |
| YDR080W                                          | VPS41         | YLR093C                 | NYV1          |
| YFR034C                                          | PHO4          | YNL289W                 | PCL1          |
| YPL129W                                          | TAF14         | YNL236W                 | SIN4          |
| YDL185W                                          | TFP1          | YMR054W                 | STV1          |
| YLR148W                                          | PEP3          | YML001W                 | YPT7          |
| YHR052W                                          | CIC1          | YER002W                 | NOP16         |
| YMR068W                                          | AVO2          | YIL105C                 | SLM1          |

| Predictions at threshold level 0.95 continued... |               |                         |               |
|--------------------------------------------------|---------------|-------------------------|---------------|
| Gene1 of predicted pair                          |               | Gene2 of predicted pair |               |
| Systematic Name                                  | Standard Name | Systematic Name         | Standard Name |
| YNL087W                                          | TCB2          | YGL013C                 | PDR1          |
| YCR097W                                          | HMRA1         | YCL067C                 | HMLALPHA2     |
| YLR148W                                          | PEP3          | YOR106W                 | VAM3          |
| YOR212W                                          | STE4          | YJR086W                 | STE18         |
| YPL019C                                          | VTC3          | YER072W                 | VTC1          |
| YBR065C                                          | ECM2          | YPL213W                 | LEA1          |
| YDR195W                                          | REF2          | YOR179C                 | SYC1          |
| YOL090W                                          | MSH2          | YGR258C                 | RAD2          |
| YHR200W                                          | RPN10         | YGR232W                 | NAS6          |
| YGR129W                                          | SYF2          | YPR101W                 | SNT309        |
| YHR157W                                          | REC104        | YMR133W                 | REC114        |
| YHR108W                                          | GGA2          | YDR153C                 | ENT5          |
| YHL006C                                          | SHU1          | YDR078C                 | SHU2          |
| YLR384C                                          | IKI3          | YHR187W                 | IKI1          |
| YFR008W                                          | FAR7          | YMR029C                 | FAR8          |
| YDR443C                                          | SSN2          | YNL288W                 | CAF40         |
| YDR103W                                          | STE5          | YLR362W                 | STE11         |
| YMR192W                                          | GYL1          | YPL249C                 | GYP5          |
| YBR010W                                          | HHT1          | YOR141C                 | ARP8          |
| YML109W                                          | ZDS2          | YER124C                 | DSE1          |
| YGL051W                                          | MST27         | YAR033W                 | MST28         |
| YDR103W                                          | STE5          | YDL159W                 | STE7          |
| YJR010C-A                                        | SPC1          | YDL006W                 | PTC1          |
| YJL176C                                          | SWI3          | YHL025W                 | SNF6          |
| YCR002C                                          | CDC10         | YNL078W                 | NIS1          |
| YGL212W                                          | VAM7          | YOR036W                 | PEP12         |
| YDR225W                                          | HTA1          | YBR133C                 | HSL7          |
| YOR270C                                          | VPH1          | YER072W                 | VTC1          |
| YFR021W                                          | ATG18         | YER162C                 | RAD4          |

| Predictions at threshold level 0.95 continued... |               |                         |               |
|--------------------------------------------------|---------------|-------------------------|---------------|
| Gene1 of predicted pair                          |               | Gene2 of predicted pair |               |
| Systematic Name                                  | Standard Name | Systematic Name         | Standard Name |
| YDR078C                                          | SHU2          | YLR376C                 | PSY3          |
| YBR017C                                          | KAP104        | YKL068W                 | NUP100        |
| YDL227C                                          | HO            | YML088W                 | UFO1          |
| YGL006W                                          | PMC1          | YLR093C                 | NYV1          |
| YGR275W                                          | RTT102        | YLR357W                 | RSC2          |
| YGR239C                                          | PEX21         | YLR191W                 | PEX13         |
| YBL021C                                          | HAP3          | YKL109W                 | HAP4          |
| YIL072W                                          | HOP1          | YOR351C                 | MEK1          |
| YPL129W                                          | TAF14         | YKL109W                 | HAP4          |
| YPL129W                                          | TAF14         | YGR252W                 | GCN5          |
| YER087C-B                                        | SBH1          | YDL232W                 | OST4          |
| YDR139C                                          | RUB1          | YLR128W                 | DCN1          |
| YEL009C                                          | GCN4          | YPL042C                 | SSN3          |
| YLR191W                                          | PEX13         | YDR265W                 | PEX10         |
| YHR178W                                          | STB5          | YGL013C                 | PDR1          |
| YER042W                                          | MXR1          | YGR209C                 | TRX2          |
| YDR496C                                          | PUF6          | YKL130C                 | SHE2          |
| YKL139W                                          | CTK1          | YCL011C                 | GBP2          |
| YGL025C                                          | PGD1          | YPL248C                 | GAL4          |
| YMR109W                                          | MYO5          | YOR247W                 | SRL1          |
| YGR104C                                          | SRB5          | YGL151W                 | NUT1          |
| YER052C                                          | HOM3          | YNL135C                 | FPR1          |
| YKR001C                                          | VPS1          | YMR204C                 | INP1          |
| YER019C-A                                        | SBH2          | YML019W                 | OST6          |
| YOR270C                                          | VPH1          | YKL080W                 | VMA5          |
| YJL089W                                          | SIP4          | YMR280C                 | CAT8          |
| YEL009C                                          | GCN4          | YBR111W-A               | SUS1          |
| YOL147C                                          | PEX11         | YDL065C                 | PEX19         |
| YLL022C                                          | HIF1          | YBR009C                 | HHF1          |

| Predictions at threshold level 0.95 continued... |               |                         |               |
|--------------------------------------------------|---------------|-------------------------|---------------|
| Gene1 of predicted pair                          |               | Gene2 of predicted pair |               |
| Systematic Name                                  | Standard Name | Systematic Name         | Standard Name |
| YDL185W                                          | TFP1          | YJR033C                 | RAV1          |
| YCL067C                                          | HMLALPHA2     | YCR084C                 | TUP1          |
| YJL183W                                          | MNN11         | YEL036C                 | ANP1          |
| YLL026W                                          | HSP104        | YLR357W                 | RSC2          |
| YBR127C                                          | VMA2          | YEL051W                 | VMA8          |
| YCR084C                                          | TUP1          | YPR068C                 | HOS1          |
| YOR275C                                          | RIM20         | YHL027W                 | RIM101        |
| YCR084C                                          | TUP1          | YBR010W                 | HHT1          |
| YDR244W                                          | PEX5          | YDR142C                 | PEX7          |
| YOR231W                                          | MKK1          | YLR313C                 | SPH1          |
| YDL065C                                          | PEX19         | YPL112C                 | PEX25         |
| YLR148W                                          | PEP3          | YDL077C                 | VAM6          |
| YJL176C                                          | SWI3          | YBR289W                 | SNF5          |
| YJL122W                                          | ALB1          | YHR052W                 | CIC1          |
| YJL128C                                          | PBS2          | YDL006W                 | PTC1          |
| YGR020C                                          | VMA7          | YDL185W                 | TFP1          |
| YER143W                                          | DDI1          | YOR327C                 | SNC2          |
| YNL215W                                          | IES2          | YPL129W                 | TAF14         |
| YPL129W                                          | TAF14         | YDR073W                 | SNF11         |
| YLR109W                                          | AHP1          | YIL008W                 | URM1          |
| YBL017C                                          | PEP1          | YJL029C                 | VPS53         |
| YPR018W                                          | RLF2          | YBR010W                 | HHT1          |
| YNL288W                                          | CAF40         | YPR072W                 | NOT5          |
| YNR052C                                          | POP2          | YGR134W                 | CAF130        |
| YLL010C                                          | PSR1          | YOR043W                 | WHI2          |
| YMR201C                                          | RAD14         | YJR052W                 | RAD7          |
| YLR303W                                          | MET17         | YLR377C                 | FBP1          |
| YLR148W                                          | PEP3          | YDR080W                 | VPS41         |
| YJL210W                                          | PEX2          | YGL153W                 | PEX14         |

| Predictions at threshold level 0.95 continued... |               |                         |               |
|--------------------------------------------------|---------------|-------------------------|---------------|
| Gene1 of predicted pair                          |               | Gene2 of predicted pair |               |
| Systematic Name                                  | Standard Name | Systematic Name         | Standard Name |
| YFR024C-A                                        | LSB3          | YPL246C                 | RBD2          |
| YDR425W                                          | SNX41         | YJL036W                 | SNX4          |
| YOL082W                                          | ATG19         | YKL103C                 | LAP4          |
| YJL089W                                          | SIP4          | YER027C                 | GAL83         |
| YLR337C                                          | VRP1          | YIL130W                 | ASG1          |
| YOR275C                                          | RIM20         | YPR173C                 | VPS4          |
| YHR193C                                          | EGD2          | YPL037C                 | EGD1          |
| YNL206C                                          | RTT106        | YNL031C                 | HHT2          |
| YER102W                                          | RPS8B         | YBL072C                 | RPS8A         |
| YLR248W                                          | RCK2          | YMR243C                 | ZRC1          |
| YMR159C                                          | ATG16         | YPL149W                 | ATG5          |
| YBR171W                                          | SEC66         | YCL001W                 | RER1          |
| YBR020W                                          | GAL1          | YPL248C                 | GAL4          |
| YLL039C                                          | UBI4          | YDL190C                 | UFD2          |
| YDR171W                                          | HSP42         | YPR119W                 | CLB2          |
| YFR024C-A                                        | LSB3          | YHR114W                 | BZZ1          |
| YGR129W                                          | SYF2          | YPL213W                 | LEA1          |
| YOR270C                                          | VPH1          | YBR127C                 | VMA2          |
| YHR119W                                          | SET1          | YOL145C                 | CTR9          |
| YJL060W                                          | BNA3          | YPR119W                 | CLB2          |
| YOL110W                                          | SHR5          | YLR246W                 | ERF2          |
| YMR026C                                          | PEX12         | YDR265W                 | PEX10         |
| YDR443C                                          | SSN2          | YER068W                 | MOT2          |
| YBR111W-A                                        | SUS1          | YLR055C                 | SPT8          |
| YLR324W                                          | PEX30         | YBR168W                 | PEX32         |
| YLL022C                                          | HIF1          | YEL056W                 | HAT2          |
| YMR312W                                          | ELP6          | YHR187W                 | IKI1          |
| YDR244W                                          | PEX5          | YDL065C                 | PEX19         |
| YLR292C                                          | SEC72         | YLR301W                 | YLR301W       |



| Predictions at threshold level 0.95 continued... |               |                         |               |
|--------------------------------------------------|---------------|-------------------------|---------------|
| Gene1 of predicted pair                          |               | Gene2 of predicted pair |               |
| Systematic Name                                  | Standard Name | Systematic Name         | Standard Name |
| YCR084C                                          | TUP1          | YNL167C                 | SKO1          |
| YGR104C                                          | SRB5          | YDL005C                 | MED2          |
| YBR111W-A                                        | SUS1          | YGR252W                 | GCN5          |
| YNL076W                                          | MKS1          | YGL252C                 | RTG2          |
| YHR150W                                          | PEX28         | YBR168W                 | PEX32         |
| YDR329C                                          | PEX3          | YGL153W                 | PEX14         |
| YLR079W                                          | SIC1          | YGL019W                 | CKB1          |
| YNR023W                                          | SNF12         | YDR073W                 | SNF11         |
| YDL185W                                          | TFP1          | YEL051W                 | VMA8          |
| YDL042C                                          | SIR2          | YML109W                 | ZDS2          |
| YCR077C                                          | PAT1          | YNL147W                 | LSM7          |
| YDL042C                                          | SIR2          | YDR440W                 | DOT1          |
| YCL067C                                          | HMLALPHA2     | YBR112C                 | CYC8          |
| YHL022C                                          | SPO11         | YGL213C                 | SKI8          |
| YCR063W                                          | BUD31         | YPR101W                 | SNT309        |
| YNL243W                                          | SLA2          | YNL094W                 | APP1          |
| YDR195W                                          | REF2          | YAR014C                 | BUD14         |
| YLR399C                                          | BDF1          | YBR010W                 | HHT1          |
| YNL206C                                          | RTT106        | YBR009C                 | HHF1          |
| YGR040W                                          | KSS1          | YBL016W                 | FUS3          |
| YCR020W-B                                        | HTL1          | YGR275W                 | RTT102        |
| YNL180C                                          | RHO5          | YFL047W                 | RGD2          |
| YDR227W                                          | SIR4          | YBR010W                 | HHT1          |
| YJR010C-A                                        | SPC1          | YER019C-A               | SBH2          |
| YHR084W                                          | STE12         | YER109C                 | FLO8          |
| YOR197W                                          | MCA1          | YLL017W                 | YLL017W       |
| YDR146C                                          | SWI5          | YDL155W                 | CLB3          |
| YBR009C                                          | HHF1          | YEL056W                 | HAT2          |
| YBR112C                                          | CYC8          | YGR252W                 | GCN5          |

| Predictions at threshold level 0.95 continued... |               |                         |               |
|--------------------------------------------------|---------------|-------------------------|---------------|
| Gene1 of predicted pair                          |               | Gene2 of predicted pair |               |
| Systematic Name                                  | Standard Name | Systematic Name         | Standard Name |
| YOR351C                                          | MEK1          | YLR263W                 | RED1          |
| YDR244W                                          | PEX5          | YGR077C                 | PEX8          |
| YGL115W                                          | SNF4          | YDR422C                 | SIP1          |
| YPR028W                                          | YOP1          | YGL198W                 | YIP4          |
| YDL065C                                          | PEX19         | YOL044W                 | PEX15         |
| YJR052W                                          | RAD7          | YBR114W                 | RAD16         |
| YOR018W                                          | ROD1          | YLR248W                 | RCK2          |
| YML109W                                          | ZDS2          | YDR309C                 | GIC2          |
| YDR496C                                          | PUF6          | YHR052W                 | CIC1          |
| YML121W                                          | GTR1          | YKR007W                 | MEH1          |
| YMR139W                                          | RIM11         | YDR207C                 | UME6          |
| YOR276W                                          | CAF20         | YOL045W                 | PSK2          |
| YPL046C                                          | ELC1          | YGL115W                 | SNF4          |
| YDR181C                                          | SAS4          | YMR127C                 | SAS2          |
| YBR289W                                          | SNF5          | YKL109W                 | HAP4          |
| YPL046C                                          | ELC1          | YOR028C                 | CIN5          |
| YBR009C                                          | HHF1          | YOR141C                 | ARP8          |
| YPL046C                                          | ELC1          | YER059W                 | PCL6          |
| YBR195C                                          | MSI1          | YNL183C                 | NPR1          |
| YDL185W                                          | TFP1          | YKL080W                 | VMA5          |
| YPL045W                                          | VPS16         | YAL002W                 | VPS8          |
| YDL160C                                          | DHH1          | YJL124C                 | LSM1          |
| YDR225W                                          | HTA1          | YDR448W                 | ADA2          |
| YEL027W                                          | CUP5          | YDL185W                 | TFP1          |
| YBR264C                                          | YPT10         | YKR014C                 | YPT52         |
| YOR039W                                          | CKB2          | YLR399C                 | BDF1          |
| YGL078C                                          | DBP3          | YGR159C                 | NSR1          |
| YNL206C                                          | RTT106        | YBR010W                 | HHT1          |
| YDR080W                                          | VPS41         | YMR231W                 | PEP5          |

| Predictions at threshold level 0.95 continued... |               |                         |               |
|--------------------------------------------------|---------------|-------------------------|---------------|
| Gene1 of predicted pair                          |               | Gene2 of predicted pair |               |
| Systematic Name                                  | Standard Name | Systematic Name         | Standard Name |
| YGR209C                                          | TRX2          | YML028W                 | TSA1          |
| YLR102C                                          | APC9          | YDR260C                 | SWM1          |
| YBL021C                                          | HAP3          | YHR187W                 | IKI1          |
| YAL009W                                          | SPO7          | YMR165C                 | PAH1          |
| YBL003C                                          | HTA2          | YGL241W                 | KAP114        |
| YPL050C                                          | MNN9          | YPR154W                 | PIN3          |
| YBR009C                                          | HHF1          | YKR048C                 | NAP1          |
| YJR092W                                          | BUD4          | YPR122W                 | AXL1          |
| YEL009C                                          | GCN4          | YDR448W                 | ADA2          |
| YOR270C                                          | VPH1          | YEL027W                 | CUP5          |
| YEL059C-A                                        | SOM1          | YMR035W                 | IMP2          |
| YOR270C                                          | VPH1          | YMR054W                 | STV1          |
| YBR128C                                          | ATG14         | YPL120W                 | VPS30         |
| YDL160C                                          | DHH1          | YCR077C                 | PAT1          |
| YNL135C                                          | FPR1          | YNL023C                 | FAP1          |
| YMR127C                                          | SAS2          | YOR213C                 | SAS5          |
| YJL176C                                          | SWI3          | YPL129W                 | TAF14         |
| YLR043C                                          | TRX1          | YML028W                 | TSA1          |
| YOR078W                                          | BUD21         | YHR203C                 | RPS4B         |
| YDR264C                                          | AKR1          | YKL178C                 | STE3          |
| YNL214W                                          | PEX17         | YGR077C                 | PEX8          |
| YOR178C                                          | GAC1          | YLR258W                 | GSY2          |
| YML100W                                          | TSL1          | YMR261C                 | TPS3          |
| YGL066W                                          | SGF73         | YOL148C                 | SPT20         |
| YML001W                                          | YPT7          | YGL198W                 | YIP4          |
| YBR036C                                          | CSG2          | YBR161W                 | CSH1          |
| YCL010C                                          | SGF29         | YBR111W-A               | SUS1          |
| YHR052W                                          | CIC1          | YOL041C                 | NOP12         |
| YNL253W                                          | TEX1          | YNL004W                 | HRB1          |

| Predictions at threshold level 0.95 continued... |               |                         |               |
|--------------------------------------------------|---------------|-------------------------|---------------|
| Gene1 of predicted pair                          |               | Gene2 of predicted pair |               |
| Systematic Name                                  | Standard Name | Systematic Name         | Standard Name |
| YJL210W                                          | PEX2          | YDL065C                 | PEX19         |
| YDR142C                                          | PEX7          | YNL214W                 | PEX17         |
| YNL314W                                          | DAL82         | YIR023W                 | DAL81         |
| YPL042C                                          | SSN3          | YMR037C                 | MSN2          |
| YML095C                                          | RAD10         | YMR201C                 | RAD14         |
| YOR358W                                          | HAP5          | YKL109W                 | HAP4          |
| YML001W                                          | YPT7          | YMR231W                 | PEP5          |
| YHR052W                                          | CIC1          | YDR312W                 | SSF2          |
| YNL229C                                          | URE2          | YER040W                 | GLN3          |
| YDR392W                                          | SPT3          | YBR111W-A               | SUS1          |
| YOL062C                                          | APM4          | YPL259C                 | APM1          |
| YLR181C                                          | VTA1          | YPR173C                 | VPS4          |
| YNR023W                                          | SNF12         | YER161C                 | SPT2          |
| YHL031C                                          | GOS1          | YOR036W                 | PEP12         |
| YBR126C                                          | TPS1          | YFL033C                 | RIM15         |
| YOL117W                                          | RRI2          | YJR084W                 | CSN12         |
| YPL129W                                          | TAF14         | YEL044W                 | IES6          |
| YBR111W-A                                        | SUS1          | YPL248C                 | GAL4          |
| YPL121C                                          | MEI5          | YHR079C-A               | SAE3          |
| YJR125C                                          | ENT3          | YNR006W                 | VPS27         |
| YFR043C                                          | IRC6          | YLR248W                 | RCK2          |
| YFL003C                                          | MSH4          | YDL154W                 | MSH5          |
| YPL046C                                          | ELC1          | YJR052W                 | RAD7          |
| YLR324W                                          | PEX30         | YMR204C                 | INP1          |
| YER143W                                          | DDI1          | YOL018C                 | TLG2          |
| YKL002W                                          | DID4          | YKL041W                 | VPS24         |
| YDR176W                                          | NGG1          | YPL248C                 | GAL4          |
| YBR112C                                          | CYC8          | YCR084C                 | TUP1          |
| YHR157W                                          | REC104        | YHL022C                 | SPO11         |

| Predictions at threshold level 0.95 continued... |               |                         |               |
|--------------------------------------------------|---------------|-------------------------|---------------|
| Gene1 of predicted pair                          |               | Gene2 of predicted pair |               |
| Systematic Name                                  | Standard Name | Systematic Name         | Standard Name |
| YHR084W                                          | STE12         | YBL016W                 | FUS3          |
| YDL101C                                          | DUN1          | YBL088C                 | TEL1          |
| YLR170C                                          | APS1          | YHL019C                 | APM2          |
| YDR176W                                          | NGG1          | YOR023C                 | AHC1          |
| YER087C-B                                        | SBH1          | YJR010C-A               | SPC1          |
| YER011W                                          | TIR1          | YPL178W                 | CBC2          |
| YHR160C                                          | PEX18         | YLR191W                 | PEX13         |
| YOL044W                                          | PEX15         | YAL055W                 | PEX22         |
| YPR029C                                          | APL4          | YJR125C                 | ENT3          |
| YBL071W-A                                        | KTI11         | YIL103W                 | DPH1          |
| YER114C                                          | BOI2          | YBR200W                 | BEM1          |
| YJL176C                                          | SWI3          | YGR275W                 | RTT102        |
| YDR443C                                          | SSN2          | YPL042C                 | SSN3          |
| YDR264C                                          | AKR1          | YJR086W                 | STE18         |
| YDR329C                                          | PEX3          | YDL065C                 | PEX19         |
| YLR353W                                          | BUD8          | YOR301W                 | RAX1          |
| YNL031C                                          | HHT2          | YEL056W                 | HAT2          |
| YBR111W-A                                        | SUS1          | YOL148C                 | SPT20         |
| YOR253W                                          | NAT5          | YHR013C                 | ARD1          |
| YGL066W                                          | SGF73         | YGR252W                 | GCN5          |
| YHR052W                                          | CIC1          | YGL246C                 | RAI1          |
| YCR065W                                          | HCM1          | YPR119W                 | CLB2          |
| YBR217W                                          | ATG12         | YLL042C                 | ATG10         |
| YAL024C                                          | LTE1          | YHR158C                 | KEL1          |
| YCR084C                                          | TUP1          | YNL236W                 | SIN4          |
| YML109W                                          | ZDS2          | YHR061C                 | GIC1          |
| YOR005C                                          | DNL4          | YGL090W                 | LIF1          |
| YHR171W                                          | ATG7          | YLL042C                 | ATG10         |
| YGL226C-A                                        | OST5          | YML019W                 | OST6          |

| Predictions at threshold level 0.95 continued... |               |                         |               |
|--------------------------------------------------|---------------|-------------------------|---------------|
| Gene1 of predicted pair                          |               | Gene2 of predicted pair |               |
| Systematic Name                                  | Standard Name | Systematic Name         | Standard Name |
| YHR052W                                          | CIC1          | YKL009W                 | MRT4          |
| YDR135C                                          | YCF1          | YGL181W                 | GTS1          |
| YML062C                                          | MFT1          | YCL011C                 | GBP2          |
| YDR103W                                          | STE5          | YBL016W                 | FUS3          |
| YLR138W                                          | NHA1          | YML132W                 | COS3          |
| YJL124C                                          | LSM1          | YPR119W                 | CLB2          |
| YNL206C                                          | RTT106        | YML102W                 | CAC2          |
| YPL129W                                          | TAF14         | YOR189W                 | IES4          |
| YDR378C                                          | LSM6          | YOR320C                 | GNT1          |
| YPR066W                                          | UBA3          | YDR139C                 | RUB1          |
| YMR026C                                          | PEX12         | YDR142C                 | PEX7          |
| YBL071W-A                                        | KTI11         | YKL191W                 | DPH2          |
| YNL090W                                          | RHO2          | YDL240W                 | LRG1          |
| YGR200C                                          | ELP2          | YBL071W-A               | KTI11         |
| YCR097W                                          | HMRA1         | YCR039C                 | MATALPHA2     |
| YER068W                                          | MOT2          | YGR134W                 | CAF130        |
| YDR103W                                          | STE5          | YCL032W                 | STE50         |
| YFL048C                                          | EMP47         | YEL036C                 | ANP1          |
| YAL014C                                          | SYN8          | YOR036W                 | PEP12         |
| YPR072W                                          | NOT5          | YGR134W                 | CAF130        |
| YDL065C                                          | PEX19         | YAL055W                 | PEX22         |
| YOL062C                                          | APM4          | YJR005W                 | APL1          |
| YMR029C                                          | FAR8          | YMR052W                 | FAR3          |
| YNL236W                                          | SIN4          | YGL151W                 | NUT1          |
| YDR225W                                          | HTA1          | YDR176W                 | NGG1          |
| YHR119W                                          | SET1          | YDR469W                 | SDC1          |
| YGL237C                                          | HAP2          | YKL109W                 | HAP4          |
| YGR133W                                          | PEX4          | YAL055W                 | PEX22         |
| YHR119W                                          | SET1          | YLR288C                 | MEC3          |

| Predictions at threshold level 0.95 continued... |               |                         |               |
|--------------------------------------------------|---------------|-------------------------|---------------|
| Gene1 of predicted pair                          |               | Gene2 of predicted pair |               |
| Systematic Name                                  | Standard Name | Systematic Name         | Standard Name |
| YMR231W                                          | PEP5          | YDL077C                 | VAM6          |
| YNL288W                                          | CAF40         | YGR134W                 | CAF130        |
| YJL210W                                          | PEX2          | YGR077C                 | PEX8          |
| YDR260C                                          | SWM1          | YPR119W                 | CLB2          |
| YKR014C                                          | YPT52         | YPR028W                 | YOP1          |
| YDR477W                                          | SNF1          | YPL248C                 | GAL4          |
| YMR026C                                          | PEX12         | YOL044W                 | PEX15         |
| YDR192C                                          | NUP42         | YBR017C                 | KAP104        |
| YNL288W                                          | CAF40         | YNR052C                 | POP2          |
| YDR329C                                          | PEX3          | YOL147C                 | PEX11         |
| YLR377C                                          | FBP1          | YNR065C                 | YNR065C       |
| YNL106C                                          | INP52         | YCR088W                 | ABP1          |
| YPL086C                                          | ELP3          | YHR187W                 | IKI1          |
| YDR443C                                          | SSN2          | YFL028C                 | CAF16         |
| YLR191W                                          | PEX13         | YOL044W                 | PEX15         |
| YAR042W                                          | SWH1          | YHR195W                 | NVJ1          |
| YML095C                                          | RAD10         | YOL090W                 | MSH2          |
| YEL009C                                          | GCN4          | YDR176W                 | NGG1          |
| YGR252W                                          | GCN5          | YBL002W                 | HTB2          |
| YMR202W                                          | ERG2          | YER044C                 | ERG28         |
| YBL078C                                          | ATG8          | YNL223W                 | ATG4          |
| YCR092C                                          | MSH3          | YOL090W                 | MSH2          |
| YPL161C                                          | BEM4          | YHR061C                 | GIC1          |
| YDR103W                                          | STE5          | YOR212W                 | STE4          |
| YMR025W                                          | CSI1          | YJR084W                 | CSN12         |
| YOR230W                                          | WTM1          | YOR229W                 | WTM2          |
| YGR173W                                          | RBG2          | YDR152W                 | GIR2          |
| YOL044W                                          | PEX15         | YNL214W                 | PEX17         |
| YPR036W                                          | VMA13         | YER005W                 | YND1          |

| Predictions at threshold level 0.95 continued... |               |                         |               |
|--------------------------------------------------|---------------|-------------------------|---------------|
| Gene1 of predicted pair                          |               | Gene2 of predicted pair |               |
| Systematic Name                                  | Standard Name | Systematic Name         | Standard Name |
| YOR080W                                          | DIA2          | YPR119W                 | CLB2          |
| YGR159C                                          | NSR1          | YLR410W                 | VIP1          |
| YIR025W                                          | MND2          | YFR036W                 | CDC26         |
| YDR176W                                          | NGG1          | YCL010C                 | SGF29         |
| YLR396C                                          | VPS33         | YAL002W                 | VPS8          |
| YDL239C                                          | ADY3          | YNL225C                 | CNM67         |
| YML062C                                          | MFT1          | YNL004W                 | HRB1          |
| YPL037C                                          | EGD1          | YDR252W                 | BTT1          |
| YGR239C                                          | PEX21         | YDR142C                 | PEX7          |
| YBR112C                                          | CYC8          | YGL025C                 | PGD1          |
| YLR238W                                          | FAR10         | YMR052W                 | FAR3          |
| YDR507C                                          | GIN4          | YNL078W                 | NIS1          |
| YMR026C                                          | PEX12         | YLR191W                 | PEX13         |
| YHR052W                                          | CIC1          | YGL189C                 | RPS26A        |
| YJL124C                                          | LSM1          | YNL147W                 | LSM7          |
| YGR004W                                          | PEX31         | YLR324W                 | PEX30         |
| YLR079W                                          | SIC1          | YOR039W                 | CKB2          |
| YDR295C                                          | HDA2          | YPR179C                 | HDA3          |
| YER044C-A                                        | MEI4          | YMR133W                 | REC114        |
| YDR142C                                          | PEX7          | YGL153W                 | PEX14         |
| YBR111W-A                                        | SUS1          | YBR010W                 | HHT1          |
| YMR243C                                          | ZRC1          | YGL158W                 | RCK1          |
| YOL018C                                          | TLG2          | YDL047W                 | SIT4          |
| YEL009C                                          | GCN4          | YOR290C                 | SNF2          |
| YNL047C                                          | SLM2          | YJL058C                 | BIT61         |
| YFL003C                                          | MSH4          | YGL249W                 | ZIP2          |
| YER110C                                          | KAP123        | YBR009C                 | HHF1          |
| YJL210W                                          | PEX2          | YDR244W                 | PEX5          |
| YOR332W                                          | VMA4          | YMR054W                 | STV1          |



| Predictions at threshold level 0.95 continued... |               |                         |               |
|--------------------------------------------------|---------------|-------------------------|---------------|
| Gene1 of predicted pair                          |               | Gene2 of predicted pair |               |
| Systematic Name                                  | Standard Name | Systematic Name         | Standard Name |
| YKL092C                                          | BUD2          | YGR152C                 | RSR1          |
| YAL051W                                          | OAF1          | YOR363C                 | PIP2          |
| YNL025C                                          | SSN8          | YPL248C                 | GAL4          |
| YBR131W                                          | CCZ1          | YML001W                 | YPT7          |
| YML001W                                          | YPT7          | YPL045W                 | VPS16         |
| YLR191W                                          | PEX13         | YDR142C                 | PEX7          |
| YGL115W                                          | SNF4          | YER027C                 | GAL83         |
| YPL129W                                          | TAF14         | YNR023W                 | SNF12         |
| YPL001W                                          | HAT1          | YNL031C                 | HHT2          |
| YJL106W                                          | IME2          | YJR094C                 | IME1          |
| YOR005C                                          | DNL4          | YCR014C                 | POL4          |
| YPL042C                                          | SSN3          | YJL089W                 | SIP4          |
| YEL009C                                          | GCN4          | YOR298C-A               | MBF1          |
| YLR370C                                          | ARC18         | YPR119W                 | CLB2          |
| YNL259C                                          | ATX1          | YDR270W                 | CCC2          |
| YPL246C                                          | RBD2          | YHR016C                 | YSC84         |
| YDR165W                                          | TRM82         | YDL201W                 | TRM8          |
| YKL130C                                          | SHE2          | YKL185W                 | ASH1          |
| YDL213C                                          | NOP6          | YOR078W                 | BUD21         |
| YBR138C                                          | YBR138C       | YGR223C                 | HSV2          |
| YBR127C                                          | VMA2          | YMR054W                 | STV1          |
| YNL004W                                          | HRB1          | YCL011C                 | GBP2          |
| YDR092W                                          | UBC13         | YLR032W                 | RAD5          |
| YMR273C                                          | ZDS1          | YHR061C                 | GIC1          |
| YDR142C                                          | PEX7          | YDL065C                 | PEX19         |
| YDR244W                                          | PEX5          | YOL044W                 | PEX15         |
| YCL010C                                          | SGF29         | YGR252W                 | GCN5          |
| YDR101C                                          | ARX1          | YKL068W                 | NUP100        |
| YHR185C                                          | PFS1          | YIL007C                 | NAS2          |

| Predictions at threshold level 0.95 continued... |               |                         |               |
|--------------------------------------------------|---------------|-------------------------|---------------|
| Gene1 of predicted pair                          |               | Gene2 of predicted pair |               |
| Systematic Name                                  | Standard Name | Systematic Name         | Standard Name |
| YDL005C                                          | MED2          | YCR084C                 | TUP1          |
| YFL003C                                          | MSH4          | YLR394W                 | CST9          |
| YCR002C                                          | CDC10         | YDR507C                 | GIN4          |
| YLR181C                                          | VTA1          | YKR035W-A               | DID2          |
| YLR191W                                          | PEX13         | YDR244W                 | PEX5          |
| YPL129W                                          | TAF14         | YHL025W                 | SNF6          |
| YGR241C                                          | YAP1802       | YBL047C                 | EDE1          |
| YMR091C                                          | NPL6          | YLR357W                 | RSC2          |
| YOL013C                                          | HRD1          | YMR022W                 | UBC7          |
| YJR021C                                          | REC107        | YMR133W                 | REC114        |
| YBL078C                                          | ATG8          | YNR007C                 | ATG3          |
| YNL253W                                          | TEX1          | YHR167W                 | THP2          |
| YNL333W                                          | SNZ2          | YMR096W                 | SNZ1          |
| YJL122W                                          | ALB1          | YDR101C                 | ARX1          |
| YJR094C                                          | IME1          | YDR207C                 | UME6          |
| YIL132C                                          | CSM2          | YHL006C                 | SHU1          |
| YOR270C                                          | VPH1          | YGR020C                 | VMA7          |
| YCL027W                                          | FUS1          | YPR119W                 | CLB2          |
| YGR104C                                          | SRB5          | YPL129W                 | TAF14         |
| YMR042W                                          | ARG80         | YDR207C                 | UME6          |
| YLR043C                                          | TRX1          | YOR106W                 | VAM3          |
| YMR026C                                          | PEX12         | YNL214W                 | PEX17         |
| YBR188C                                          | NTC20         | YPL213W                 | LEA1          |
| YCR038C                                          | BUD5          | YPR122W                 | AXL1          |
| YNL145W                                          | MFA2          | YCR077C                 | PAT1          |
| YDR101C                                          | ARX1          | YHR052W                 | CIC1          |
| YNL078W                                          | NIS1          | YCL024W                 | KCC4          |
| YFR024C-A                                        | LSB3          | YHR016C                 | YSC84         |
| YLR306W                                          | UBC12         | YDR139C                 | RUB1          |

| Predictions at threshold level 0.95 continued... |               |                         |               |
|--------------------------------------------------|---------------|-------------------------|---------------|
| Gene1 of predicted pair                          |               | Gene2 of predicted pair |               |
| Systematic Name                                  | Standard Name | Systematic Name         | Standard Name |
| YDR176W                                          | NGG1          | YGL066W                 | SGF73         |
| YER044C-A                                        | MEI4          | YHR086W                 | NAM8          |
| YLL039C                                          | UBI4          | YNR006W                 | VPS27         |
| YPR036W                                          | VMA13         | YMR054W                 | STV1          |
| YNL094W                                          | APP1          | YCR088W                 | ABP1          |
| YDR265W                                          | PEX10         | YOL044W                 | PEX15         |
| YNL025C                                          | SSN8          | YDR477W                 | SNF1          |
| YER087C-B                                        | SBH1          | YML019W                 | OST6          |
| YBR289W                                          | SNF5          | YOR038C                 | HIR2          |
| YBR273C                                          | UBX7          | YJL048C                 | UBX6          |
| YJL176C                                          | SWI3          | YOR290C                 | SNF2          |
| YHR056C                                          | RSC30         | YLR357W                 | RSC2          |
| YCR081W                                          | SRB8          | YGL025C                 | PGD1          |
| YGR249W                                          | MGA1          | YPL203W                 | TPK2          |
| YHR086W                                          | NAM8          | YJR021C                 | REC107        |
| YDR440W                                          | DOT1          | YBR010W                 | HHT1          |
| YHR119W                                          | SET1          | YBR258C                 | SHG1          |
| YBL046W                                          | PSY4          | YPR040W                 | TIP41         |
| YGL180W                                          | ATG1          | YPR185W                 | ATG13         |
| YPR049C                                          | ATG11         | YGL180W                 | ATG1          |
| YDL227C                                          | HO            | YLL013C                 | PUF3          |
| YPR101W                                          | SNT309        | YPL213W                 | LEA1          |
| YOL062C                                          | APM4          | YJR058C                 | APS2          |
| YHR052W                                          | CIC1          | YIL133C                 | RPL16A        |
| YBR217W                                          | ATG12         | YPL149W                 | ATG5          |
| YPR167C                                          | MET16         | YGR209C                 | TRX2          |
| YNL139C                                          | RLR1          | YNL004W                 | HRB1          |
| YLR093C                                          | NYV1          | YEL036C                 | ANP1          |
| YJR140C                                          | HIR3          | YFR021W                 | ATG18         |

| Predictions at threshold level 0.95 continued... |               |                         |               |
|--------------------------------------------------|---------------|-------------------------|---------------|
| Gene1 of predicted pair                          |               | Gene2 of predicted pair |               |
| Systematic Name                                  | Standard Name | Systematic Name         | Standard Name |
| YDR181C                                          | SAS4          | YOR213C                 | SAS5          |
| YOR076C                                          | SKI7          | YOR001W                 | RRP6          |
| YDL106C                                          | PHO2          | YDR146C                 | SWI5          |
| YDR448W                                          | ADA2          | YBR111W-A               | SUS1          |
| YDL216C                                          | RRI1          | YJR084W                 | CSN12         |
| YDR448W                                          | ADA2          | YBR010W                 | HHT1          |
| YHL025W                                          | SNF6          | YER161C                 | SPT2          |
| YOR043W                                          | WHI2          | YMR037C                 | MSN2          |
| YKL130C                                          | SHE2          | YBR130C                 | SHE3          |
| YEL015W                                          | EDC3          | YBL066C                 | SEF1          |
| YKL197C                                          | PEX1          | YNL329C                 | PEX6          |
| YDL184C                                          | RPL41A        | YJL124C                 | LSM1          |
| YEL009C                                          | GCN4          | YHL025W                 | SNF6          |
| YOR270C                                          | VPH1          | YDL185W                 | TFP1          |
| YHR016C                                          | YSC84         | YHR114W                 | BZZ1          |
| YPL246C                                          | RBD2          | YHR114W                 | BZZ1          |
| YBL008W                                          | HIR1          | YOR290C                 | SNF2          |
| YHL031C                                          | GOS1          | YLR093C                 | NYV1          |
| YDL116W                                          | NUP84         | YBR017C                 | KAP104        |
| YOR332W                                          | VMA4          | YDR202C                 | RAV2          |
| YGL158W                                          | RCK1          | YPL058C                 | PDR12         |
| YLR384C                                          | IKI3          | YBL071W-A               | KTI11         |
| YOR371C                                          | GPB1          | YGL121C                 | GPG1          |
| YDR296W                                          | MHR1          | YPL248C                 | GAL4          |
| YEL009C                                          | GCN4          | YPL129W                 | TAF14         |
| YER109C                                          | FLO8          | YBR083W                 | TEC1          |
| YIL072W                                          | HOP1          | YLR263W                 | RED1          |
| YDR192C                                          | NUP42         | YMR255W                 | GFD1          |
| YNL329C                                          | PEX6          | YOL044W                 | PEX15         |

| Predictions at threshold level 0.95 continued... |               |                         |               |
|--------------------------------------------------|---------------|-------------------------|---------------|
| Gene1 of predicted pair                          |               | Gene2 of predicted pair |               |
| Systematic Name                                  | Standard Name | Systematic Name         | Standard Name |
| YDR142C                                          | PEX7          | YOL044W                 | PEX15         |
| YPL125W                                          | KAP120        | YKL068W                 | NUP100        |
| YLR191W                                          | PEX13         | YNL214W                 | PEX17         |
| YHR187W                                          | IKI1          | YPL101W                 | ELP4          |
| YPL129W                                          | TAF14         | YGL025C                 | PGD1          |
| YKL020C                                          | SPT23         | YOR124C                 | UBP2          |
| YIL050W                                          | PCL7          | YGR233C                 | PHO81         |
| YOL091W                                          | SPO21         | YNL225C                 | CNM67         |
| YDL080C                                          | THI3          | YBR240C                 | THI2          |
| YEL054C                                          | RPL12A        | YGL246C                 | RAI1          |
| YPL086C                                          | ELP3          | YBL071W-A               | KTI11         |
| YPL050C                                          | MNN9          | YJL183W                 | MNN11         |
| YMR026C                                          | PEX12         | YDR244W                 | PEX5          |
| YOR127W                                          | RGA1          | YDR309C                 | GIC2          |
| YIR017C                                          | MET28         | YJR060W                 | CBF1          |
| YKR084C                                          | HBS1          | YNL001W                 | DOM34         |
| YLR396C                                          | VPS33         | YGL124C                 | MON1          |
| YIL140W                                          | AXL2          | YGL054C                 | ERV14         |
| YGL153W                                          | PEX14         | YGR077C                 | PEX8          |
| YMR223W                                          | UBP8          | YBR111W-A               | SUS1          |
| YFR009W                                          | GCN20         | YJL189W                 | RPL39         |
| YDR225W                                          | HTA1          | YGL241W                 | KAP114        |
| YHR016C                                          | YSC84         | YOR284W                 | HUA2          |
| YDR244W                                          | PEX5          | YGL153W                 | PEX14         |
| YLR181C                                          | VTA1          | YDR486C                 | VPS60         |
| YDR265W                                          | PEX10         | YDL065C                 | PEX19         |
| YLR148W                                          | PEP3          | YGL124C                 | MON1          |
| YGR283C                                          | YGR283C       | YMR310C                 | YMR310C       |
| YBL003C                                          | HTA2          | YGR275W                 | RTT102        |

| Predictions at threshold level 0.95 continued... |               |                         |               |
|--------------------------------------------------|---------------|-------------------------|---------------|
| Gene1 of predicted pair                          |               | Gene2 of predicted pair |               |
| Systematic Name                                  | Standard Name | Systematic Name         | Standard Name |
| YHR079C                                          | IRE1          | YDR448W                 | ADA2          |
| YPR049C                                          | ATG11         | YOL082W                 | ATG19         |
| YGL134W                                          | PCL10         | YLR258W                 | GSY2          |
| YOR106W                                          | VAM3          | YLR093C                 | NYV1          |
| YPR167C                                          | MET16         | YLR043C                 | TRX1          |
| YJL124C                                          | LSM1          | YOR320C                 | GNT1          |
| YPL213W                                          | LEA1          | YJR050W                 | ISY1          |
| YOR212W                                          | STE4          | YFL026W                 | STE2          |
| YOR290C                                          | SNF2          | YHL025W                 | SNF6          |
| YFL026W                                          | STE2          | YPL187W                 | MF(ALPHA)1    |
| YJR125C                                          | ENT3          | YHR108W                 | GGA2          |
| YOL061W                                          | PRS5          | YER099C                 | PRS2          |
| YLR043C                                          | TRX1          | YLR093C                 | NYV1          |
| YHR084W                                          | STE12         | YMR164C                 | MSS11         |
| YNL021W                                          | HDA1          | YPR179C                 | HDA3          |
| YIL132C                                          | CSM2          | YLR376C                 | PSY3          |
| YMR095C                                          | SNO1          | YMR096W                 | SNZ1          |
| YOR138C                                          | RUP1          | YOR124C                 | UBP2          |
| YBL016W                                          | FUS3          | YDL159W                 | STE7          |
| YLR176C                                          | RFX1          | YCR084C                 | TUP1          |
| YDR103W                                          | STE5          | YBR200W                 | BEM1          |
| YOR212W                                          | STE4          | YJL157C                 | FAR1          |
| YAL024C                                          | LTE1          | YGR238C                 | KEL2          |
| YMR091C                                          | NPL6          | YCR020W-B               | HTL1          |
| YIL034C                                          | CAP2          | YGR080W                 | TWF1          |
| YPR018W                                          | RLF2          | YNL206C                 | RTT106        |
| YER143W                                          | DDI1          | YAL030W                 | SNC1          |
| YDL185W                                          | TFP1          | YHR039C-A               | VMA10         |
| YLR447C                                          | VMA6          | YDL185W                 | TFP1          |

| Predictions at threshold level 0.95 continued... |               |                         |               |
|--------------------------------------------------|---------------|-------------------------|---------------|
| Gene1 of predicted pair                          |               | Gene2 of predicted pair |               |
| Systematic Name                                  | Standard Name | Systematic Name         | Standard Name |
| YLR399C                                          | BDF1          | YNL030W                 | HHF2          |
| YBR009C                                          | HHF1          | YDR227W                 | SIR4          |
| YPL042C                                          | SSN3          | YGL025C                 | PGD1          |
| YMR026C                                          | PEX12         | YGL153W                 | PEX14         |
| YJL151C                                          | SNA3          | YHR016C                 | YSC84         |
| YJL210W                                          | PEX2          | YOL044W                 | PEX15         |
| YDR329C                                          | PEX3          | YOL044W                 | PEX15         |
| YOL061W                                          | PRS5          | YBL068W                 | PRS4          |
| YDR057W                                          | YOS9          | YDR144C                 | MKC7          |
| YNL206C                                          | RTT106        | YNL030W                 | HHF2          |
| YLR109W                                          | AHP1          | YLR043C                 | TRX1          |
| YPL045W                                          | VPS16         | YDL077C                 | VAM6          |
| YML100W                                          | TSL1          | YFL033C                 | RIM15         |
| YAL016W                                          | TPD3          | YGL190C                 | CDC55         |
| YDR477W                                          | SNF1          | YER027C                 | GAL83         |
| YPL105C                                          | YPL105C       | YKL074C                 | MUD2          |
| YCL010C                                          | SGF29         | YOL148C                 | SPT20         |
| YHR119W                                          | SET1          | YPL138C                 | SPP1          |
| YBR112C                                          | CYC8          | YDL005C                 | MED2          |
| YDR382W                                          | RPP2B         | YJL124C                 | LSM1          |
| YNL243W                                          | SLA2          | YHR016C                 | YSC84         |
| YOR304W                                          | ISW2          | YDR207C                 | UME6          |
| YDL239C                                          | ADY3          | YOL091W                 | SPO21         |
| YOL091W                                          | SPO21         | YOR177C                 | MPC54         |
| YHR160C                                          | PEX18         | YDR142C                 | PEX7          |
| YDR448W                                          | ADA2          | YPL129W                 | TAF14         |
| YGL158W                                          | RCK1          | YDR423C                 | CAD1          |
| YDR283C                                          | GCN2          | YFR009W                 | GCN20         |
| YPL164C                                          | MLH3          | YMR167W                 | MLH1          |

| Predictions at threshold level 0.95 continued... |               |                         |               |
|--------------------------------------------------|---------------|-------------------------|---------------|
| Gene1 of predicted pair                          |               | Gene2 of predicted pair |               |
| Systematic Name                                  | Standard Name | Systematic Name         | Standard Name |
| YEL009C                                          | GCN4          | YJL176C                 | SWI3          |
| YOR212W                                          | STE4          | YDR264C                 | AKR1          |
| YHR149C                                          | SKG6          | YMR273C                 | ZDS1          |
| YGR041W                                          | BUD9          | YOR301W                 | RAX1          |
| YBL078C                                          | ATG8          | YOR106W                 | VAM3          |
| YLR435W                                          | TSR2          | YGL189C                 | RPS26A        |
| YNL291C                                          | MID1          | YGR217W                 | CCH1          |
| YDR179C                                          | CSN9          | YMR025W                 | CSI1          |
| YGR200C                                          | ELP2          | YHR187W                 | IKI1          |
| YOR127W                                          | RGA1          | YGR152C                 | RSR1          |
| YBR200W                                          | BEM1          | YLR362W                 | STE11         |
| YPL129W                                          | TAF14         | YOR141C                 | ARP8          |
| YDR176W                                          | NGG1          | YPL129W                 | TAF14         |
| YDL106C                                          | PHO2          | YFR034C                 | PHO4          |
| YBR127C                                          | VMA2          | YDL185W                 | TFP1          |
| YLR453C                                          | RIF2          | YBR275C                 | RIF1          |
| YKR035W-A                                        | DID2          | YPR173C                 | VPS4          |
| YBR264C                                          | YPT10         | YGL198W                 | YIP4          |
| YDR179C                                          | CSN9          | YJR084W                 | CSN12         |
| YOR078W                                          | BUD21         | YER102W                 | RPS8B         |
| YEL009C                                          | GCN4          | YPL248C                 | GAL4          |
| YDR244W                                          | PEX5          | YGL205W                 | POX1          |
| YOR290C                                          | SNF2          | YDR073W                 | SNF11         |
| YNL243W                                          | SLA2          | YOR284W                 | HUA2          |
| YEL009C                                          | GCN4          | YGR252W                 | GCN5          |
| YML001W                                          | YPT7          | YKR014C                 | YPT52         |
| YEL022W                                          | GEA2          | YKR030W                 | GMH1          |
| YDR004W                                          | RAD57         | YLR394W                 | CST9          |
| YKL213C                                          | DOA1          | YJL048C                 | UBX6          |



| Predictions at threshold level 0.95 continued... |               |                         |               |
|--------------------------------------------------|---------------|-------------------------|---------------|
| Gene1 of predicted pair                          |               | Gene2 of predicted pair |               |
| Systematic Name                                  | Standard Name | Systematic Name         | Standard Name |
| YDR176W                                          | NGG1          | YBR111W-A               | SUS1          |
| YDL065C                                          | PEX19         | YNL214W                 | PEX17         |
| YNL044W                                          | YIP3          | YKR014C                 | YPT52         |
| YLR313C                                          | SPH1          | YDL159W                 | STE7          |
| YBL008W                                          | HIR1          | YBR289W                 | SNF5          |
| YKL110C                                          | KTI12         | YDL047W                 | SIT4          |
| YGL033W                                          | HOP2          | YGL183C                 | MND1          |
| YPL129W                                          | TAF14         | YOL051W                 | GAL11         |
| YBR270C                                          | BIT2          | YNL047C                 | SLM2          |
| YBR182C                                          | SMP1          | YPL089C                 | RLM1          |
| YLR360W                                          | VPS38         | YBR128C                 | ATG14         |
| YDR448W                                          | ADA2          | YOR023C                 | AHC1          |
| YPR018W                                          | RLF2          | YBR009C                 | HHF1          |
| YER173W                                          | RAD24         | YHR079C-A               | SAE3          |
| YMR109W                                          | MYO5          | YMR032W                 | HOF1          |
| YBL008W                                          | HIR1          | YBR009C                 | HHF1          |
| YKL139W                                          | CTK1          | YNL004W                 | HRB1          |
| YOR038C                                          | HIR2          | YBR010W                 | HHT1          |
| YGL066W                                          | SGF73         | YCL010C                 | SGF29         |
| YKL181W                                          | PRS1          | YER099C                 | PRS2          |
| YKL007W                                          | CAP1          | YGR080W                 | TWF1          |
| YDR265W                                          | PEX10         | YAL055W                 | PEX22         |
| YOR332W                                          | VMA4          | YDL185W                 | TFP1          |
| YBR065C                                          | ECM2          | YPR101W                 | SNT309        |
| YDR477W                                          | SNF1          | YDR028C                 | REG1          |
| YBR126C                                          | TPS1          | YMR261C                 | TPS3          |
| YPL129W                                          | TAF14         | YDL005C                 | MED2          |
| YDR293C                                          | SSD1          | YER033C                 | ZRG8          |
| YIL038C                                          | NOT3          | YGR134W                 | CAF130        |

| Predictions at threshold level 0.95 continued... |               |                         |               |
|--------------------------------------------------|---------------|-------------------------|---------------|
| Gene1 of predicted pair                          |               | Gene2 of predicted pair |               |
| Systematic Name                                  | Standard Name | Systematic Name         | Standard Name |
| YJL044C                                          | GYP6          | YDR456W                 | NHX1          |
| YDR443C                                          | SSN2          | YPR072W                 | NOT5          |
| YHR084W                                          | STE12         | YBR083W                 | TEC1          |
| YMR164C                                          | MSS11         | YER109C                 | FLO8          |
| YBR217W                                          | ATG12         | YHR171W                 | ATG7          |
| YKL073W                                          | LHS1          | YJL159W                 | HSP150        |
| YHR119W                                          | SET1          | YAR003W                 | SWD1          |
| YLR432W                                          | IMD3          | YHR216W                 | IMD2          |
| YGL153W                                          | PEX14         | YNL214W                 | PEX17         |
| YPL042C                                          | SSN3          | YCR084C                 | TUP1          |
| YPL161C                                          | BEM4          | YDR218C                 | SPR28         |
| YHL002W                                          | HSE1          | YNR006W                 | VPS27         |
| YKR069W                                          | MET1          | YMR109W                 | MYO5          |
| YDR192C                                          | NUP42         | YNL049C                 | SFB2          |
| YMR231W                                          | PEP5          | YAL002W                 | VPS8          |
| YGR003W                                          | CUL3          | YDR139C                 | RUB1          |
| YJR099W                                          | YUH1          | YDR139C                 | RUB1          |
| YOR270C                                          | VPH1          | YKL119C                 | VPH2          |
| YDR225W                                          | HTA1          | YNL107W                 | YAF9          |
| YOL018C                                          | TLG2          | YJL164C                 | TPK1          |
| YAL014C                                          | SYN8          | YAL030W                 | SNC1          |
| YOR290C                                          | SNF2          | YOR038C                 | HIR2          |
| YPL089C                                          | RLM1          | YKL161C                 | YKL161C       |
| YBL017C                                          | PEP1          | YDR484W                 | VPS52         |
| YMR164C                                          | MSS11         | YBR083W                 | TEC1          |
| YPL198W                                          | RPL7B         | YOR078W                 | BUD21         |
| YER114C                                          | BOI2          | YML109W                 | ZDS2          |
| YBR131W                                          | CCZ1          | YOR106W                 | VAM3          |
| YDL232W                                          | OST4          | YOR085W                 | OST3          |

| Predictions at threshold level 0.95 continued... |               |                         |               |
|--------------------------------------------------|---------------|-------------------------|---------------|
| Gene1 of predicted pair                          |               | Gene2 of predicted pair |               |
| Systematic Name                                  | Standard Name | Systematic Name         | Standard Name |
| YGL025C                                          | PGD1          | YGL151W                 | NUT1          |
| YLR178C                                          | TFS1          | YOL081W                 | IRA2          |
| YJL210W                                          | PEX2          | YNL214W                 | PEX17         |
| YDR202C                                          | RAV2          | YDL185W                 | TFP1          |
| YOR145C                                          | PNO1          | YOR001W                 | RRP6          |
| YML099C                                          | ARG81         | YMR042W                 | ARG80         |
| YDR009W                                          | GAL3          | YML051W                 | GAL80         |
| YDL149W                                          | ATG9          | YLR431C                 | ATG23         |
| YFR008W                                          | FAR7          | YMR052W                 | FAR3          |
| YOR358W                                          | HAP5          | YPL248C                 | GAL4          |
| YJL210W                                          | PEX2          | YMR026C                 | PEX12         |
| YML109W                                          | ZDS2          | YDR227W                 | SIR4          |
| YCR002C                                          | CDC10         | YCL024W                 | KCC4          |
| YDR358W                                          | GGA1          | YDL137W                 | ARF2          |
| YDR200C                                          | VPS64         | YMR052W                 | FAR3          |
| YPR131C                                          | NAT3          | YKR024C                 | DBP7          |
| YBR200W                                          | BEM1          | YBL085W                 | BOI1          |
| YGL095C                                          | VPS45         | YOL018C                 | TLG2          |
| YGL066W                                          | SGF73         | YBR111W-A               | SUS1          |
| YHR052W                                          | CIC1          | YHR010W                 | RPL27A        |
| YDR448W                                          | ADA2          | YLR399C                 | BDF1          |
| YER114C                                          | BOI2          | YER124C                 | DSE1          |
| YDR293C                                          | SSD1          | YKR028W                 | SAP190        |
| YML051W                                          | GAL80         | YPL248C                 | GAL4          |
| YDL020C                                          | RPN4          | YIL007C                 | NAS2          |
| YDR289C                                          | RTT103        | YGL246C                 | RAI1          |
| YDR265W                                          | PEX10         | YGL153W                 | PEX14         |
| YNL242W                                          | ATG2          | YDL149W                 | ATG9          |
| YOR332W                                          | VMA4          | YEL051W                 | VMA8          |

| Predictions at threshold level 0.95 continued... |               |                         |               |
|--------------------------------------------------|---------------|-------------------------|---------------|
| Gene1 of predicted pair                          |               | Gene2 of predicted pair |               |
| Systematic Name                                  | Standard Name | Systematic Name         | Standard Name |
| YHR171W                                          | ATG7          | YBL078C                 | ATG8          |
| YKR101W                                          | SIR1          | YDR227W                 | SIR4          |
| YMR091C                                          | NPL6          | YGR275W                 | RTT102        |
| YDL127W                                          | PCL2          | YDR146C                 | SWI5          |
| YDL185W                                          | TFP1          | YPL234C                 | TFP3          |
| YMR224C                                          | MRE11         | YLR357W                 | RSC2          |
| YGR252W                                          | GCN5          | YPL248C                 | GAL4          |
| YPL106C                                          | SSE1          | YPR119W                 | CLB2          |
| YGR275W                                          | RTT102        | YHL025W                 | SNF6          |
| YDL113C                                          | ATG20         | YJL036W                 | SNX4          |
| YPL129W                                          | TAF14         | YJL140W                 | RPB4          |
| YEL009C                                          | GCN4          | YBR289W                 | SNF5          |
| YBL078C                                          | ATG8          | YDR080W                 | VPS41         |
| YNL031C                                          | HHT2          | YDR440W                 | DOT1          |
| YMR016C                                          | SOK2          | YMR037C                 | MSN2          |
| YNL139C                                          | RLR1          | YCL011C                 | GBP2          |
| YLR080W                                          | EMP46         | YFL048C                 | EMP47         |
| YIL156W                                          | UBP7          | YMR109W                 | MYO5          |
| YJR052W                                          | RAD7          | YER162C                 | RAD4          |
| YDR009W                                          | GAL3          | YPL248C                 | GAL4          |
| YFL004W                                          | VTC2          | YER072W                 | VTC1          |
| YIL045W                                          | PIG2          | YLR258W                 | GSY2          |
| YMR054W                                          | STV1          | YKL080W                 | VMA5          |
| YLR377C                                          | FBP1          | YOL126C                 | MDH2          |
| YDR479C                                          | PEX29         | YLR324W                 | PEX30         |
| YJL065C                                          | DLS1          | YOR304W                 | ISW2          |
| YDR448W                                          | ADA2          | YGL066W                 | SGF73         |
| YGL087C                                          | MMS2          | YDR092W                 | UBC13         |
| YIL156W                                          | UBP7          | YHR114W                 | BZZ1          |

| Predictions at threshold level 0.95 continued... |               |                         |               |
|--------------------------------------------------|---------------|-------------------------|---------------|
| Gene1 of predicted pair                          |               | Gene2 of predicted pair |               |
| Systematic Name                                  | Standard Name | Systematic Name         | Standard Name |
| YDR443C                                          | SSN2          | YNR052C                 | POP2          |
| YMR231W                                          | PEP5          | YGL124C                 | MON1          |
| YHR084W                                          | STE12         | YDR480W                 | DIG2          |
| YDR443C                                          | SSN2          | YIL038C                 | NOT3          |
| YDR225W                                          | HTA1          | YGR252W                 | GCN5          |
| YDR225W                                          | HTA1          | YBR009C                 | HHF1          |
| YNR023W                                          | SNF12         | YHL025W                 | SNF6          |
| YIR009W                                          | MSL1          | YPL213W                 | LEA1          |
| YDR192C                                          | NUP42         | YDR335W                 | MSN5          |
| YMR026C                                          | PEX12         | YDL065C                 | PEX19         |
| YLR385C                                          | SWC7          | YNL107W                 | YAF9          |
| YHR171W                                          | ATG7          | YNR007C                 | ATG3          |
| YGL053W                                          | PRM8          | YAR031W                 | PRM9          |
| YLR240W                                          | VPS34         | YBR128C                 | ATG14         |
| YDR507C                                          | GIN4          | YNL166C                 | BNI5          |
| YBR217W                                          | ATG12         | YMR159C                 | ATG16         |
| YLR399C                                          | BDF1          | YGR252W                 | GCN5          |
| YBL078C                                          | ATG8          | YLR093C                 | NYV1          |
| YMR261C                                          | TPS3          | YFL033C                 | RIM15         |
| YOR231W                                          | MKK1          | YJL095W                 | BCK1          |
| YJL157C                                          | FAR1          | YJR086W                 | STE18         |
| YER180C-A                                        | SLO1          | YPL051W                 | ARL3          |
| YMR068W                                          | AVO2          | YNL047C                 | SLM2          |
| YDL099W                                          | BUG1          | YKL050C                 | YKL050C       |
| YBR200W                                          | BEM1          | YDL159W                 | STE7          |
| YCR002C                                          | CDC10         | YNL166C                 | BNI5          |
| YKL129C                                          | MYO3          | YMR032W                 | HOF1          |
| YGL133W                                          | ITC1          | YJL065C                 | DLS1          |
| YLR191W                                          | PEX13         | YGL153W                 | PEX14         |

| Predictions at threshold level 0.95 continued... |               |                         |               |
|--------------------------------------------------|---------------|-------------------------|---------------|
| Gene1 of predicted pair                          |               | Gene2 of predicted pair |               |
| Systematic Name                                  | Standard Name | Systematic Name         | Standard Name |
| YGL066W                                          | SGF73         | YPR119W                 | CLB2          |
| YDR142C                                          | PEX7          | YGR077C                 | PEX8          |
| YAL016W                                          | TPD3          | YPL152W                 | RRD2          |
| YJL137C                                          | GLG2          | YLR258W                 | GSY2          |
| YPL129W                                          | TAF14         | YOR290C                 | SNF2          |
| YAL056W                                          | GPB2          | YGL121C                 | GPG1          |
| YDL232W                                          | OST4          | YML019W                 | OST6          |
| YMR080C                                          | NAM7          | YKL068W                 | NUP100        |
| YGL158W                                          | RCK1          | YNL065W                 | AQR1          |
| YPL112C                                          | PEX25         | YMR204C                 | INP1          |
| YLR265C                                          | NEJ1          | YGL090W                 | LIF1          |
| YPL129W                                          | TAF14         | YCR084C                 | TUP1          |
| YBR289W                                          | SNF5          | YDR073W                 | SNF11         |
| YGL249W                                          | ZIP2          | YLR394W                 | CST9          |
| YHR160C                                          | PEX18         | YIL160C                 | POT1          |
| YOR270C                                          | VPH1          | YEL051W                 | VMA8          |
| YJL210W                                          | PEX2          | YDR265W                 | PEX10         |
| YMR255W                                          | GFD1          | YMR273C                 | ZDS1          |
| YPR018W                                          | RLF2          | YOR213C                 | SAS5          |
| YDL042C                                          | SIR2          | YBR010W                 | HHT1          |
| YIL162W                                          | SUC2          | YBR283C                 | SSH1          |
| YOR270C                                          | VPH1          | YGR105W                 | VMA21         |
| YDR153C                                          | ENT5          | YNR006W                 | VPS27         |
| YDL155W                                          | CLB3          | YPL256C                 | CLN2          |
| YEL009C                                          | GCN4          | YNR023W                 | SNF12         |
| YBR200W                                          | BEM1          | YBL016W                 | FUS3          |
| YEL009C                                          | GCN4          | YGR104C                 | SRB5          |
| YJL176C                                          | SWI3          | YNR023W                 | SNF12         |
| YKL034W                                          | TUL1          | YBR082C                 | UBC4          |

| Predictions at threshold level 0.95 continued... |               |                         |               |
|--------------------------------------------------|---------------|-------------------------|---------------|
| Gene1 of predicted pair                          |               | Gene2 of predicted pair |               |
| Systematic Name                                  | Standard Name | Systematic Name         | Standard Name |
| YGR104C                                          | SRB5          | YPL248C                 | GAL4          |
| YPL042C                                          | SSN3          | YPL129W                 | TAF14         |
| YOR096W                                          | RPS7A         | YBL071W-A               | KTI11         |
| YDR244W                                          | PEX5          | YDR265W                 | PEX10         |
| YNL044W                                          | YIP3          | YGL198W                 | YIP4          |
| YLR399C                                          | BDF1          | YBR009C                 | HHF1          |
| YGR238C                                          | KEL2          | YHR158C                 | KEL1          |
| YOL067C                                          | RTG1          | YOL108C                 | INO4          |
| YOR032C                                          | HMS1          | YNL289W                 | PCL1          |
| YPL129W                                          | TAF14         | YPL248C                 | GAL4          |
| YFR034C                                          | PHO4          | YGR233C                 | PHO81         |
| YDR202C                                          | RAV2          | YBR127C                 | VMA2          |
| YGR252W                                          | GCN5          | YFL031W                 | HAC1          |
| YBR273C                                          | UBX7          | YKL213C                 | DOA1          |
| YJR058C                                          | APS2          | YJR005W                 | APL1          |
| YJL089W                                          | SIP4          | YDR477W                 | SNF1          |
| YDR092W                                          | UBC13         | YCR066W                 | RAD18         |
| YOL082W                                          | ATG19         | YGL156W                 | AMS1          |
| YFR021W                                          | ATG18         | YDL149W                 | ATG9          |
| YDL113C                                          | ATG20         | YPR049C                 | ATG11         |
| YJL110C                                          | GZF3          | YKR034W                 | DAL80         |
| YIL156W                                          | UBP7          | YHL002W                 | HSE1          |
| YOL051W                                          | GAL11         | YJL140W                 | RPB4          |
| YER044C-A                                        | MEI4          | YJR021C                 | REC107        |
| YKL048C                                          | ELM1          | YPR119W                 | CLB2          |
| YJL176C                                          | SWI3          | YDR073W                 | SNF11         |
| YOR332W                                          | VMA4          | YPR036W                 | VMA13         |
| YNL025C                                          | SSN8          | YCR084C                 | TUP1          |
| YDR142C                                          | PEX7          | YIL160C                 | POT1          |

| Predictions at threshold level 0.95 continued... |               |                         |               |
|--------------------------------------------------|---------------|-------------------------|---------------|
| Gene1 of predicted pair                          |               | Gene2 of predicted pair |               |
| Systematic Name                                  | Standard Name | Systematic Name         | Standard Name |
| YHR079C                                          | IRE1          | YOL148C                 | SPT20         |
| YNL253W                                          | TEX1          | YML062C                 | MFT1          |
| YNR032C-A                                        | HUB1          | YDL223C                 | HBT1          |
| YGL025C                                          | PGD1          | YCR084C                 | TUP1          |
| YJR031C                                          | GEA1          | YKR030W                 | GMH1          |
| YOR106W                                          | VAM3          | YEL013W                 | VAC8          |
| YNL139C                                          | RLR1          | YNL253W                 | TEX1          |
| YCL067C                                          | HMLALPHA2     | YCL066W                 | HMLALPHA1     |
| YDR080W                                          | VPS41         | YPL045W                 | VPS16         |
| YLR396C                                          | VPS33         | YML001W                 | YPT7          |
| YNL288W                                          | CAF40         | YIL038C                 | NOT3          |
| YPL147W                                          | PXA1          | YKL188C                 | PXA2          |
| YKL110C                                          | KTI12         | YHR187W                 | IKI1          |
| YDL227C                                          | HO            | YER143W                 | DDI1          |
| YLR109W                                          | AHP1          | YGR209C                 | TRX2          |
| YHL025W                                          | SNF6          | YDR073W                 | SNF11         |
| YER054C                                          | GIP2          | YAR014C                 | BUD14         |
| YDR176W                                          | NGG1          | YGL013C                 | PDR1          |
| YPL001W                                          | HAT1          | YLL022C                 | HIF1          |
| YBR200W                                          | BEM1          | YJL157C                 | FAR1          |
| YBR289W                                          | SNF5          | YHL025W                 | SNF6          |
| YKL164C                                          | PIR1          | YKL114C                 | APN1          |
| YMR201C                                          | RAD14         | YOL090W                 | MSH2          |
| YBR009C                                          | HHF1          | YOR038C                 | HIR2          |
| YOR270C                                          | VPH1          | YLR447C                 | VMA6          |
| YER019C-A                                        | SBH2          | YOR085W                 | OST3          |
| YNL288W                                          | CAF40         | YER068W                 | MOT2          |
| YBR126C                                          | TPS1          | YML100W                 | TSL1          |
| YOL013C                                          | HRD1          | YLR207W                 | HRD3          |



| Predictions at threshold level 0.95 continued... |               |                         |               |
|--------------------------------------------------|---------------|-------------------------|---------------|
| Gene1 of predicted pair                          |               | Gene2 of predicted pair |               |
| Systematic Name                                  | Standard Name | Systematic Name         | Standard Name |
| YFR008W                                          | FAR7          | YDR200C                 | VPS64         |
| YBL008W                                          | HIR1          | YBR010W                 | HHT1          |
| YIR025W                                          | MND2          | YLR102C                 | APC9          |
| YCL001W                                          | RER1          | YPL227C                 | ALG5          |
| YDR225W                                          | HTA1          | YKR048C                 | NAP1          |
| YNL333W                                          | SNZ2          | YAR014C                 | BUD14         |
| YOR332W                                          | VMA4          | YOR270C                 | VPH1          |
| YGL180W                                          | ATG1          | YLR423C                 | ATG17         |
| YGR104C                                          | SRB5          | YCR084C                 | TUP1          |
| YLR191W                                          | PEX13         | YGR077C                 | PEX8          |
| YHR079C                                          | IRE1          | YER089C                 | PTC2          |
| YDR363W-A                                        | SEM1          | YPL248C                 | GAL4          |
| YLR144C                                          | ACF2          | YHR016C                 | YSC84         |
| YNL094W                                          | APP1          | YHR016C                 | YSC84         |
| YKR014C                                          | YPT52         | YGL198W                 | YIP4          |
| YDL042C                                          | SIR2          | YNL031C                 | HHT2          |
| YHR052W                                          | CIC1          | YJL189W                 | RPL39         |
| YJL029C                                          | VPS53         | YOL018C                 | TLG2          |
| YER110C                                          | KAP123        | YBR010W                 | HHT1          |
| YLR396C                                          | VPS33         | YDL077C                 | VAM6          |
| YPL047W                                          | SGF11         | YBR111W-A               | SUS1          |
| YMR273C                                          | ZDS1          | YDR227W                 | SIR4          |
| YMR052W                                          | FAR3          | YNL127W                 | FAR11         |
| YLR064W                                          | YLR064W       | YHR016C                 | YSC84         |
| YNR032C-A                                        | HUB1          | YLR313C                 | SPH1          |
| YIL033C                                          | BCY1          | YJL164C                 | TPK1          |
| YNL201C                                          | PSY2          | YPR040W                 | TIP41         |
| YOR085W                                          | OST3          | YML019W                 | OST6          |
| YPL239W                                          | YAR1          | YKL143W                 | LTV1          |

| Predictions at threshold level 0.95 continued... |               |                         |               |
|--------------------------------------------------|---------------|-------------------------|---------------|
| Gene1 of predicted pair                          |               | Gene2 of predicted pair |               |
| Systematic Name                                  | Standard Name | Systematic Name         | Standard Name |
| YDR083W                                          | RRP8          | YOR001W                 | RRP6          |
| YDL232W                                          | OST4          | YER019C-A               | SBH2          |
| YMR091C                                          | NPL6          | YNL041C                 | COG6          |
| YJL124C                                          | LSM1          | YNL145W                 | MFA2          |
| YHR079C                                          | IRE1          | YGR252W                 | GCN5          |
| YBR019C                                          | GAL10         | YGL252C                 | RTG2          |
| YDR244W                                          | PEX5          | YNL214W                 | PEX17         |
| YPR036W                                          | VMA13         | YDL185W                 | TFP1          |
| YDL042C                                          | SIR2          | YMR273C                 | ZDS1          |
| YMR273C                                          | ZDS1          | YDR309C                 | GIC2          |
| YNL201C                                          | PSY2          | YBL046W                 | PSY4          |
| YJL176C                                          | SWI3          | YOR038C                 | HIR2          |
| YJR082C                                          | EAF6          | YNL107W                 | YAF9          |
| YHR124W                                          | NDT80         | YJL106W                 | IME2          |
| YMR055C                                          | BUB2          | YHR061C                 | GIC1          |
| YOR106W                                          | VAM3          | YMR231W                 | PEP5          |
| YDR080W                                          | VPS41         | YLR396C                 | VPS33         |
| YCL011C                                          | GBP2          | YHR167W                 | THP2          |
| YOR327C                                          | SNC2          | YMR017W                 | SPO20         |
| YLR227C                                          | ADY4          | YOL091W                 | SPO21         |
| YDL154W                                          | MSH5          | YLR394W                 | CST9          |
| YPL042C                                          | SSN3          | YPL248C                 | GAL4          |
| YDR448W                                          | ADA2          | YCL010C                 | SGF29         |
| YNL004W                                          | HRB1          | YHR167W                 | THP2          |
| YBL003C                                          | HTA2          | YGR252W                 | GCN5          |
| YGR041W                                          | BUD9          | YLR353W                 | BUD8          |

Predicted pairs at a threshold level of 0.999

| Predictions at threshold level 0.999 |               |                         |               |
|--------------------------------------|---------------|-------------------------|---------------|
| Gene1 of predicted pair              |               | Gene2 of predicted pair |               |
| Systematic Name                      | Standard Name | Systematic Name         | Standard Name |
| YDL065C                              | PEX19         | YGL153W                 | PEX14         |
| YDR225W                              | HTA1          | YBL003C                 | HTA2          |
| YPL147W                              | PXA1          | YPL145C                 | KES1          |
| YGL200C                              | EMP24         | YML012W                 | ERV25         |
| YOL044W                              | PEX15         | YGL153W                 | PEX14         |
| YJL210W                              | PEX2          | YLR191W                 | PEX13         |
| YLR191W                              | PEX13         | YDL065C                 | PEX19         |
| YIR025W                              | MND2          | YDR260C                 | SWM1          |
| YMR139W                              | RIM11         | YJR094C                 | IME1          |
| YER087C-B                            | SBH1          | YOR085W                 | OST3          |
| YDR265W                              | PEX10         | YNL214W                 | PEX17         |
| YDR225W                              | HTA1          | YBR010W                 | HHT1          |
| YMR026C                              | PEX12         | YGR077C                 | PEX8          |
| YHL006C                              | SHU1          | YLR376C                 | PSY3          |
| YPL183C                              | YPL183C       | YBR061C                 | TRM7          |
| YDL185W                              | TFP1          | YMR054W                 | STV1          |
| YLR148W                              | PEP3          | YOR106W                 | VAM3          |
| YPL019C                              | VTC3          | YER072W                 | VTC1          |
| YGR129W                              | SYF2          | YPR101W                 | SNT309        |
| YHR157W                              | REC104        | YMR133W                 | REC114        |
| YHL006C                              | SHU1          | YDR078C                 | SHU2          |
| YLR384C                              | IKI3          | YHR187W                 | IKI1          |
| YGL051W                              | MST27         | YAR033W                 | MST28         |
| YJL176C                              | SWI3          | YHL025W                 | SNF6          |
| YDR078C                              | SHU2          | YLR376C                 | PSY3          |
| YGR275W                              | RTT102        | YLR357W                 | RSC2          |
| YER087C-B                            | SBH1          | YDL232W                 | OST4          |
| YLR191W                              | PEX13         | YDR265W                 | PEX10         |

| Predictions at threshold level 0.999 continued... |               |                         |               |
|---------------------------------------------------|---------------|-------------------------|---------------|
| Gene1 of predicted pair                           |               | Gene2 of predicted pair |               |
| Systematic Name                                   | Standard Name | Systematic Name         | Standard Name |
| YER019C-A                                         | SBH2          | YML019W                 | OST6          |
| YJL183W                                           | MNN11         | YEL036C                 | ANP1          |
| YDR244W                                           | PEX5          | YDR142C                 | PEX7          |
| YLR148W                                           | PEP3          | YDL077C                 | VAM6          |
| YPL129W                                           | TAF14         | YDR073W                 | SNF11         |
| YNL288W                                           | CAF40         | YPR072W                 | NOT5          |
| YLR148W                                           | PEP3          | YDR080W                 | VPS41         |
| YJL210W                                           | PEX2          | YGL153W                 | PEX14         |
| YOL082W                                           | ATG19         | YKL103C                 | LAP4          |
| YMR159C                                           | ATG16         | YPL149W                 | ATG5          |
| YOL110W                                           | SHR5          | YLR246W                 | ERF2          |
| YMR026C                                           | PEX12         | YDR265W                 | PEX10         |
| YDR244W                                           | PEX5          | YDL065C                 | PEX19         |
| YLR292C                                           | SEC72         | YLR301W                 | YLR301W       |
| YGR104C                                           | SRB5          | YDL005C                 | MED2          |
| YBR111W-A                                         | SUS1          | YGR252W                 | GCN5          |
| YHR150W                                           | PEX28         | YBR168W                 | PEX32         |
| YDL185W                                           | TFP1          | YEL051W                 | VMA8          |
| YCR077C                                           | PAT1          | YNL147W                 | LSM7          |
| YDR244W                                           | PEX5          | YGR077C                 | PEX8          |
| YDR080W                                           | VPS41         | YMR231W                 | PEP5          |
| YLR102C                                           | APC9          | YDR260C                 | SWM1          |
| YAL009W                                           | SPO7          | YMR165C                 | PAH1          |
| YEL059C-A                                         | SOM1          | YMR035W                 | IMP2          |
| YJL176C                                           | SWI3          | YPL129W                 | TAF14         |
| YNL214W                                           | PEX17         | YGR077C                 | PEX8          |
| YBR036C                                           | CSG2          | YBR161W                 | CSH1          |
| YJL210W                                           | PEX2          | YDL065C                 | PEX19         |
| YDR142C                                           | PEX7          | YNL214W                 | PEX17         |

| Predictions at threshold level 0.999 continued... |               |                         |               |
|---------------------------------------------------|---------------|-------------------------|---------------|
| Gene1 of predicted pair                           |               | Gene2 of predicted pair |               |
| Systematic Name                                   | Standard Name | Systematic Name         | Standard Name |
| YLR181C                                           | VTA1          | YPR173C                 | VPS4          |
| YBR126C                                           | TPS1          | YFL033C                 | RIM15         |
| YOL117W                                           | RRI2          | YJR084W                 | CSN12         |
| YKL002W                                           | DID4          | YKL041W                 | VPS24         |
| YBR112C                                           | CYC8          | YCR084C                 | TUP1          |
| YDR443C                                           | SSN2          | YPL042C                 | SSN3          |
| YOR253W                                           | NAT5          | YHR013C                 | ARD1          |
| YBR217W                                           | ATG12         | YLL042C                 | ATG10         |
| YOR005C                                           | DNL4          | YGL090W                 | LIF1          |
| YHR171W                                           | ATG7          | YLL042C                 | ATG10         |
| YGL226C-A                                         | OST5          | YML019W                 | OST6          |
| YML062C                                           | MFT1          | YCL011C                 | GBP2          |
| YPR072W                                           | NOT5          | YGR134W                 | CAF130        |
| YMR231W                                           | PEP5          | YDL077C                 | VAM6          |
| YMR026C                                           | PEX12         | YOL044W                 | PEX15         |
| YNL288W                                           | CAF40         | YNR052C                 | POP2          |
| YPL086C                                           | ELP3          | YHR187W                 | IKI1          |
| YLR191W                                           | PEX13         | YOL044W                 | PEX15         |
| YMR202W                                           | ERG2          | YER044C                 | ERG28         |
| YMR025W                                           | CSI1          | YJR084W                 | CSN12         |
| YGR173W                                           | RBG2          | YDR152W                 | GIR2          |
| YOL044W                                           | PEX15         | YNL214W                 | PEX17         |
| YIR025W                                           | MND2          | YFR036W                 | CDC26         |
| YML062C                                           | MFT1          | YNL004W                 | HRB1          |
| YGR239C                                           | PEX21         | YDR142C                 | PEX7          |
| YMR026C                                           | PEX12         | YLR191W                 | PEX13         |
| YJL124C                                           | LSM1          | YNL147W                 | LSM7          |
| YER044C-A                                         | MEI4          | YMR133W                 | REC114        |
| YDR142C                                           | PEX7          | YGL153W                 | PEX14         |

| Predictions at threshold level 0.999 continued... |               |                         |               |
|---------------------------------------------------|---------------|-------------------------|---------------|
| Gene1 of predicted pair                           |               | Gene2 of predicted pair |               |
| Systematic Name                                   | Standard Name | Systematic Name         | Standard Name |
| YNL047C                                           | SLM2          | YJL058C                 | BIT61         |
| YJL210W                                           | PEX2          | YDR244W                 | PEX5          |
| YLR191W                                           | PEX13         | YDR142C                 | PEX7          |
| YOR005C                                           | DNL4          | YCR014C                 | POL4          |
| YNL259C                                           | ATX1          | YDR270W                 | CCC2          |
| YDR165W                                           | TRM82         | YDL201W                 | TRM8          |
| YNL004W                                           | HRB1          | YCL011C                 | GBP2          |
| YLR181C                                           | VTA1          | YKR035W-A               | DID2          |
| YLR191W                                           | PEX13         | YDR244W                 | PEX5          |
| YPL129W                                           | TAF14         | YHL025W                 | SNF6          |
| YMR091C                                           | NPL6          | YLR357W                 | RSC2          |
| YOL013C                                           | HRD1          | YMR022W                 | UBC7          |
| YJR021C                                           | REC107        | YMR133W                 | REC114        |
| YBL078C                                           | ATG8          | YNR007C                 | ATG3          |
| YNL333W                                           | SNZ2          | YMR096W                 | SNZ1          |
| YOR270C                                           | VPH1          | YGR020C                 | VMA7          |
| YGR104C                                           | SRB5          | YPL129W                 | TAF14         |
| YMR026C                                           | PEX12         | YNL214W                 | PEX17         |
| YDR101C                                           | ARX1          | YHR052W                 | CIC1          |
| YFR024C-A                                         | LSB3          | YHR016C                 | YSC84         |
| YER087C-B                                         | SBH1          | YML019W                 | OST6          |
| YJL176C                                           | SWI3          | YOR290C                 | SNF2          |
| YHR119W                                           | SET1          | YBR258C                 | SHG1          |
| YPR101W                                           | SNT309        | YPL213W                 | LEA1          |
| YOL062C                                           | APM4          | YJR058C                 | APS2          |
| YBR217W                                           | ATG12         | YPL149W                 | ATG5          |
| YDR448W                                           | ADA2          | YBR111W-A               | SUS1          |
| YDL216C                                           | RRI1          | YJR084W                 | CSN12         |
| YOR270C                                           | VPH1          | YDL185W                 | TFP1          |

| Predictions at threshold level 0.999 continued... |               |                         |               |
|---------------------------------------------------|---------------|-------------------------|---------------|
| Gene1 of predicted pair                           |               | Gene2 of predicted pair |               |
| Systematic Name                                   | Standard Name | Systematic Name         | Standard Name |
| YEL009C                                           | GCN4          | YPL129W                 | TAF14         |
| YLR191W                                           | PEX13         | YNL214W                 | PEX17         |
| YPL129W                                           | TAF14         | YGL025C                 | PGD1          |
| YDL080C                                           | THI3          | YBR240C                 | THI2          |
| YPL050C                                           | MNN9          | YJL183W                 | MNN11         |
| YMR026C                                           | PEX12         | YDR244W                 | PEX5          |
| YGL153W                                           | PEX14         | YGR077C                 | PEX8          |
| YMR223W                                           | UBP8          | YBR111W-A               | SUS1          |
| YDR244W                                           | PEX5          | YGL153W                 | PEX14         |
| YLR181C                                           | VTA1          | YDR486C                 | VPS60         |
| YDR265W                                           | PEX10         | YDL065C                 | PEX19         |
| YOR106W                                           | VAM3          | YLR093C                 | NYV1          |
| YMR095C                                           | SNO1          | YMR096W                 | SNZ1          |
| YDL185W                                           | TFP1          | YHR039C-A               | VMA10         |
| YMR026C                                           | PEX12         | YGL153W                 | PEX14         |
| YPL045W                                           | VPS16         | YDL077C                 | VAM6          |
| YAL016W                                           | TPD3          | YGL190C                 | CDC55         |
| YHR119W                                           | SET1          | YPL138C                 | SPP1          |
| YHR160C                                           | PEX18         | YDR142C                 | PEX7          |
| YGR041W                                           | BUD9          | YOR301W                 | RAX1          |
| YDR179C                                           | CSN9          | YMR025W                 | CSI1          |
| YGR200C                                           | ELP2          | YHR187W                 | IKI1          |
| YKR035W-A                                         | DID2          | YPR173C                 | VPS4          |
| YDR179C                                           | CSN9          | YJR084W                 | CSN12         |
| YDL065C                                           | PEX19         | YNL214W                 | PEX17         |
| YGL033W                                           | HOP2          | YGL183C                 | MND1          |
| YPL129W                                           | TAF14         | YOL051W                 | GAL11         |
| YOR332W                                           | VMA4          | YDL185W                 | TFP1          |
| YBR065C                                           | ECM2          | YPR101W                 | SNT309        |

| Predictions at threshold level 0.999 continued... |               |                         |               |
|---------------------------------------------------|---------------|-------------------------|---------------|
| Gene1 of predicted pair                           |               | Gene2 of predicted pair |               |
| Systematic Name                                   | Standard Name | Systematic Name         | Standard Name |
| YBR126C                                           | TPS1          | YMR261C                 | TPS3          |
| YMR164C                                           | MSS11         | YER109C                 | FLO8          |
| YBR217W                                           | ATG12         | YHR171W                 | ATG7          |
| YGL153W                                           | PEX14         | YNL214W                 | PEX17         |
| YDL232W                                           | OST4          | YOR085W                 | OST3          |
| YLR178C                                           | TFS1          | YOL081W                 | IRA2          |
| YJL210W                                           | PEX2          | YNL214W                 | PEX17         |
| YDL149W                                           | ATG9          | YLR431C                 | ATG23         |
| YFR008W                                           | FAR7          | YMR052W                 | FAR3          |
| YJL210W                                           | PEX2          | YMR026C                 | PEX12         |
| YDR265W                                           | PEX10         | YGL153W                 | PEX14         |
| YMR091C                                           | NPL6          | YGR275W                 | RTT102        |
| YFL004W                                           | VTC2          | YER072W                 | VTC1          |
| YJL065C                                           | DLS1          | YOR304W                 | ISW2          |
| YGL087C                                           | MMS2          | YDR092W                 | UBC13         |
| YDR225W                                           | HTA1          | YGR252W                 | GCN5          |
| YDR225W                                           | HTA1          | YBR009C                 | HHF1          |
| YIR009W                                           | MSL1          | YPL213W                 | LEA1          |
| YMR026C                                           | PEX12         | YDL065C                 | PEX19         |
| YHR171W                                           | ATG7          | YNR007C                 | ATG3          |
| YGL053W                                           | PRM8          | YAR031W                 | PRM9          |
| YBR217W                                           | ATG12         | YMR159C                 | ATG16         |
| YBL078C                                           | ATG8          | YLR093C                 | NYV1          |
| YER180C-A                                         | SLO1          | YPL051W                 | ARL3          |
| YMR068W                                           | AVO2          | YNL047C                 | SLM2          |
| YDL099W                                           | BUG1          | YKL050C                 | YKL050C       |
| YGL133W                                           | ITC1          | YJL065C                 | DLS1          |
| YLR191W                                           | PEX13         | YGL153W                 | PEX14         |
| YAL056W                                           | GPB2          | YGL121C                 | GPG1          |



| Predictions at threshold level 0.999 continued... |               |                         |               |
|---------------------------------------------------|---------------|-------------------------|---------------|
| Gene1 of predicted pair                           |               | Gene2 of predicted pair |               |
| Systematic Name                                   | Standard Name | Systematic Name         | Standard Name |
| YDL232W                                           | OST4          | YML019W                 | OST6          |
| YLR265C                                           | NEJ1          | YGL090W                 | LIF1          |
| YHR160C                                           | PEX18         | YIL160C                 | POT1          |
| YOR270C                                           | VPH1          | YEL051W                 | VMA8          |
| YER044C-A                                         | MEI4          | YJR021C                 | REC107        |
| YJL176C                                           | SWI3          | YDR073W                 | SNF11         |
| YDR142C                                           | PEX7          | YIL160C                 | POT1          |
| YNR032C-A                                         | HUB1          | YDL223C                 | HBT1          |
| YDR080W                                           | VPS41         | YPL045W                 | VPS16         |
| YNL288W                                           | CAF40         | YIL038C                 | NOT3          |
| YPL147W                                           | PXA1          | YKL188C                 | PXA2          |
| YHL025W                                           | SNF6          | YDR073W                 | SNF11         |
| YKL164C                                           | PIR1          | YKL114C                 | APN1          |
| YNL288W                                           | CAF40         | YER068W                 | MOT2          |
| YBR126C                                           | TPS1          | YML100W                 | TSL1          |
| YOL013C                                           | HRD1          | YLR207W                 | HRD3          |
| YFR008W                                           | FAR7          | YDR200C                 | VPS64         |
| YIR025W                                           | MND2          | YLR102C                 | APC9          |
| YCL001W                                           | RER1          | YPL227C                 | ALG5          |
| YGR104C                                           | SRB5          | YCR084C                 | TUP1          |
| YLR191W                                           | PEX13         | YGR077C                 | PEX8          |
| YLR396C                                           | VPS33         | YDL077C                 | VAM6          |
| YPL047W                                           | SGF11         | YBR111W-A               | SUS1          |
| YOR085W                                           | OST3          | YML019W                 | OST6          |
| YDL232W                                           | OST4          | YER019C-A               | SBH2          |
| YDR244W                                           | PEX5          | YNL214W                 | PEX17         |
| YDR080W                                           | VPS41         | YLR396C                 | VPS33         |
| YCL011C                                           | GBP2          | YHR167W                 | THP2          |
| YNL004W                                           | HRB1          | YHR167W                 | THP2          |
